# Supplementary material for: High-throughput mapping of the phage resistance landscape in E. coli
Source: PLoS Biol. 2020 Oct 13;18(10):e3000877. doi: 10.1371/journal.pbio.3000877 (PMC7553319; doi:10.1371/journal.pbio.3000877)
Supplement: S1 Table — RB-TnSeq, random barcode transposon site sequencing. (XLSX) [file pbio.3000877.s009.xlsx]

## Sheet: Overview
S1 Table
This file contains RB-Tnseq K-12 data for diverse phages
Planktonic assay1	sheet provide fitness score data for each gene at different condition. Column headers provide information on phages and its multiplicity of infection value.
Planktonic assay2	sheet provide fitness score data for each gene at different condition. Column headers provide information on phages and its multiplicity of infection value.
Solid plate assay	sheet provide fitness score data for each gene at different condition. Column headers provide information on phages and its multiplicity of infection value.
keio_hits	sheet provides filtered data that pass our stringent filters (Methods)
Fig2 data	dataset used in generating Fig 2 heatmap in the main text
new gene names	yrfF (igaA) pdeN(rtn); gmr (pdeR); yjcC (pdeC); dosP (pdeO); pdeL (yahA); pdeB (ylaB); pdeI (yliE); dgcJ (yeaJ); yhbJ(rapZ)

## Sheet: planktonic assays1
locusId	sysName	desc	set16IT007 LB_plus_SM_buffer	set16IT008 LB_plus_SM_buffer with T2_phage 187.5 MOI	set16IT009 LB_plus_SM_buffer with T2_phage 18.75 MOI	set16IT010 LB_plus_SM_buffer with T2_phage 1.875 MOI	set16IT011 LB_plus_SM_buffer with T2_phage 0.1875 MOI	set16IT012 LB_plus_SM_buffer with T2_phage 0.01875 MOI	set16IT021 LB_plus_SM_buffer with T3_phage 234.375 MOI	set16IT022 LB_plus_SM_buffer with T3_phage 23.4375 MOI	set16IT023 LB_plus_SM_buffer with T3_phage 2.34375 MOI	set16IT024 LB_plus_SM_buffer with T3_phage 0.234375 MOI	set16IT025 LB_plus_SM_buffer with T3_phage 0.00234375 MOI	set16IT027 LB_plus_SM_buffer with T4_phage 54.6875 MOI	set16IT028 LB_plus_SM_buffer with T4_phage 5.46875 MOI	set16IT029 LB_plus_SM_buffer with T4_phage 0.546875 MOI	set16IT030 LB_plus_SM_buffer with T4_phage 0.0546875 MOI	set16IT031 LB_plus_SM_buffer with T4_phage 0.00546875 MOI	set16IT034 LB_plus_SM_buffer with T5_phage 359.375 MOI	set16IT035 LB_plus_SM_buffer with T5_phage 35.9375 MOI	set16IT036 LB_plus_SM_buffer with T5_phage 3.59375 MOI	set16IT037 LB_plus_SM_buffer with T5_phage 0.359375 MOI	set16IT039 LB_plus_SM_buffer with T6_phage 234.375 MOI	set16IT040 LB_plus_SM_buffer with T6_phage 23.4375 MOI	set16IT041 LB_plus_SM_buffer with T6_phage 2.34375 MOI	set16IT042 LB_plus_SM_buffer with T6_phage 0.234375 MOI	set16IT043 LB_plus_SM_buffer with T6_phage 0.0234375 MOI	set16IT049 LB_plus_SM_buffer with CEV1_phage 17.1875 MOI	set16IT050 LB_plus_SM_buffer with CEV1_phage 1.71875 MOI	set16IT051 LB_plus_SM_buffer with CEV1_phage 0.171875 MOI	set16IT053 LB_plus_SM_buffer with CEV2_phage 6.40625 MOI	set16IT054 LB_plus_SM_buffer with CEV2_phage 0.640625 MOI	set16IT055 LB_plus_SM_buffer with CEV2_phage 0.0640625 MOI	set16IT045 LB_plus_SM_buffer with LZ4_phage 4.375 MOI	set16IT046 LB_plus_SM_buffer with LZ4_phage 0.4375 MOI	set16IT047 LB_plus_SM_buffer with LZ4_phage 0.04375 MOI	set16IT048 LB_plus_SM_buffer with LZ4_phage 0.004375 MOI	set16IT073 LB_plus_SM_buffer with CI1857_phage 4.84375 MOI	set16IT078 LB_plus_SM_buffer with I86_phage 143.75 MOI	set16IT079 LB_plus_SM_buffer with I86_phage 14.375 MOI	set16IT080 LB_plus_SM_buffer with I86_phage 1.4375 MOI	set16IT081 LB_plus_SM_buffer with I86_phage 0.14375 MOI	set16IT082 LB_plus_SM_buffer with N4_phage 234.375 MOI	set16IT083 LB_plus_SM_buffer with N4_phage 23.4375 MOI	set16IT084 LB_plus_SM_buffer with N4_phage 2.34375 MOI	set16IT085 LB_plus_SM_buffer with N4_phage 0.234375 MOI	set16IT086 LB_plus_SM_buffer with N4_phage 0.0234375 MOI	set19IT073 P2 0.1 MOI	set19IT074 P2 0.01 MOI
14146	b0001	thr operon leader peptide (NCBI)	0.224273	-0.335545	-0.299296	-0.576359	0.78687	-1.05686	-0.189986	-0.339977	-0.156328	-0.149268	-0.250285	-0.193262	-0.169617	-0.257697	-0.311596	-0.567718	-0.17517	-0.161122	-0.182318	-0.176602	-0.187046	-0.278209	-0.249977	-0.516238	0.0893641	0.541846	0.224931	-0.913479	0.0142779	-0.0168035	-0.0858501	-0.132002	-0.286994	-0.561133	-1.09001	-1.35732	1.72484	-0.882351	-0.93946	-0.604076	-0.40334	-0.353612	-0.303976	0.830918	-0.968883	-0.372293	-0.4883
14147	b0002	bifunctional aspartokinase I/homeserine dehydrogenase I (NCBI)	-0.148346	-0.218052	0.0481192	-0.0536079	-0.105403	-0.271106	0.0477403	0.10445	0.12405	0.0514501	0.162507	0.0684538	0.0394408	0.134328	0.00919277	-0.194096	0.0489009	0.0635212	0.0407629	0.0907869	0.139397	0.013846	-0.0445392	-0.216156	-0.33954	-0.288542	-0.62233	-0.418961	-0.108725	-0.138084	-0.207323	-0.231995	-0.184426	-0.34127	-0.64751	-0.370048	0.254117	-0.203907	-0.133612	0.0740902	0.717193	-0.200231	-0.0213708	-0.307048	0.0439008	-0.294007	0.137103
14148	b0003	homoserine kinase (NCBI)	-0.283511	-0.488436	-0.283927	-0.692152	-0.455114	-0.584181	-0.187094	-0.432791	-0.441758	-0.422101	-0.292352	-0.45973	-0.436192	-0.234054	-0.264651	-0.34238	-0.426898	-0.366609	-0.434863	-0.426128	-0.29543	-0.565627	-0.0794961	-0.542038	-0.736363	-0.569168	-0.954467	-0.339034	-0.318852	-0.349033	-0.41818	-0.479122	-0.304501	-0.697662	-0.78307	-0.1862	0.0607515	0.122949	-0.554384	-0.0714421	-0.287897	-0.226253	-0.208208	-0.189624	-0.407532	-0.376113	-1.1196
14149	b0004	threonine synthase (NCBI)	-0.464023	-0.064051	0.160173	0.0936012	-0.862099	-0.717719	0.231044	0.088682	0.279341	0.310026	0.587631	0.281455	0.304882	0.195437	0.20078	0.0276048	0.315182	0.330154	0.37037	0.319329	0.280346	0.232983	0.203339	-0.0372187	0.172797	0.176436	0.27146	-0.358807	0.4265	0.398356	0.328982	0.268143	0.323011	0.143005	0.0439206	0.146538	0.234253	0.484694	-0.595168	0.438755	0.0851356	0.175215	0.355183	0.206905	0.122281	0.13292	-0.864378
14150	b0005	hypothetical protein (NCBI)	-0.307469	-0.53594	-0.500669	-0.152567	0.711199	0.409203	-0.302276	-0.019045	-0.270719	0.219199	1.05007	-0.299333	-0.275733	-0.385502	-0.0221063	0.405385	-0.267043	-0.252756	-0.274531	-0.268181	0.0399605	-0.407406	-0.377518	-0.72016	-0.0879881	-0.395691	-1.15504	-0.351149	-0.145366	-0.17575	-0.244874	-0.305818	-0.149916	-0.47353	-0.0171881	-0.443881	0.96012	0.0511734	-1.62201	-0.292318	-0.606318	-0.557375	-0.49678	0.143066	-0.972374	0.18502	1.12515
14151	b0006	hypothetical protein (NCBI)	-0.242319	0.186507	0.20833	0.335294	-0.621443	-0.149459	-0.0828956	-0.157613	-0.0448462	-0.0246185	0.5174	-0.062166	-0.0386267	-0.148267	-0.0842762	-0.151007	-0.0293788	-0.0148516	-0.0373346	0.0975593	0.00455989	-0.168087	-0.0639079	-0.328778	0.00174753	-0.274512	-0.63777	-0.268205	-0.0242961	-0.0533768	-0.122647	-0.011927	-0.136314	-0.424386	-0.313288	-0.130573	0.367301	0.789055	-0.824595	0.0703598	-0.244026	-0.195609	-0.140104	-0.349033	0.18407	-0.0267706	-0.782065
14152	b0007	predicted transporter (NCBI)	-0.162768	-0.0621079	-0.0176865	-0.606167	-0.510298	-0.293218	-0.144044	-0.0850716	0.00393512	-0.0909623	-0.209653	-0.0528983	-0.0368994	0.0472581	-0.277694	-0.17094	-0.026109	-0.0838993	-0.106044	-0.0984975	-0.136449	-0.103699	0.0240328	-0.256943	-0.412059	-0.272508	-0.301301	-0.25639	-0.101977	-0.132127	-0.201277	-0.255783	-0.296307	-0.436678	-0.678213	0.00191768	0.131959	-0.052197	0.11665	0.100685	0.872245	0.00765844	0.208029	-0.0952201	0.0647415	-0.182406	-0.0921892
14153	b0008	transaldolase B (NCBI)	-0.099235	-0.582492	-0.218358	-0.885174	-0.633262	-0.895331	-0.553823	0.0351967	-0.5221	-0.507722	-0.623222	-0.0139853	-0.526255	-0.636019	-0.61286	-0.517954	-0.517501	-0.503188	-0.525038	-0.518437	-0.556275	-0.554411	-0.514091	-0.698194	-0.893576	-0.781485	-0.848868	-0.992105	-0.601172	-0.631673	-0.700785	-0.419889	-0.497422	-0.767068	-1.15204	-1.37702	0.682544	0.185055	-0.546538	-0.28377	-0.522453	-0.297902	-0.607213	-0.602398	-0.159505	-0.566956	-0.0341402
14154	b0009	molybdenum cofactor biosynthesis protein (NCBI)	-0.284968	-0.230541	-0.195923	-0.135944	-0.575395	-0.288834	-0.140894	-0.122807	-0.0997564	-0.0765118	-0.201061	-0.111689	-0.0881787	-0.197824	-0.00924685	0.226529	-0.0786321	-0.0639943	-0.0868036	-0.0770898	0.118116	0.409733	-0.189882	0.0176911	-0.115595	-0.11075	0.8225	0.181789	-0.0107387	-0.0399766	-0.109229	0.380414	-0.250026	-0.431896	-0.343275	-0.342684	0.3805	-0.468949	0.968193	0.065711	-0.0239719	-0.0877001	-0.0400693	-0.240422	-0.0650574	0.219014	-1.22023
14155	b0010	conserved inner membrane protein associated with acetate transport (NCBI)	-0.321469	0.110167	0.455504	0.815211	-0.149605	-0.0724398	0.751032	0.283335	0.47411	0.504622	0.372733	0.475424	0.498861	0.54603	0.328849	0.482904	0.509039	0.523966	0.500305	0.512811	0.639882	0.373085	0.397338	0.620116	0.0980324	0.24899	-0.263704	-0.222867	0.499106	0.47015	0.400867	0.340014	0.338742	0.0118587	-0.667484	0.150861	0.339785	0.0450601	0.334786	-0.707374	0.172643	0.220525	0.270904	0.521531	-0.111195	0.501793	-0.809224
14156	b0011	hypothetical protein (NCBI)	-0.0820219	0.0439668	0.174268	0.598906	0.207575	-0.302671	0.105264	0.341739	0.140426	0.157227	0.28093	0.116604	0.201611	0.324658	-0.0301559	0.4769	0.148994	0.163367	0.141336	0.217545	0.325652	0.468537	0.239553	0.199133	0.109234	0.261602	-0.620643	0.251883	-0.0246667	0.0998259	0.163794	0.105318	-0.377829	-0.539266	-0.495492	0.685107	-0.626586	-0.642874	0.344207	-0.170153	0.931025	0.312704	-0.0117423	-0.0140396	-0.243391	-0.110042	-1.23058
14158	b0013	hypothetical protein (NCBI)	-0.272827	0.951854	0.984029	0.623365	0.262845	0.458804	0.917669	0.792987	0.975784	1.01399	0.874315	0.990071	1.01345	0.904222	0.843749	1.11709	1.02411	1.03926	1.01493	1.02956	0.99044	0.88979	0.912101	0.942309	0.8871	0.828037	1.27827	0.211596	1.07784	1.05121	0.981671	0.920951	0.727196	0.867057	0.0179395	0.586351	0.404774	0.365945	-0.0702928	0.291187	0.996815	1.04281	1.07522	0.891659	0.483259	0.889662	0.547742
14159	b0014	molecular chaperone DnaK (NCBI)	-0.183035	2.06579	2.09694	1.7358	0.14558	1.12336	1.87691	1.77527	1.94758	1.99565	1.84606	1.9784	2.0017	1.89286	1.83257	1.48654	2.01288	2.02832	2.00314	2.02046	1.98114	1.88082	1.9007	1.56466	1.44087	1.62059	1.47244	0.692341	1.87001	1.84587	1.77605	1.7155	2.18453	1.1877	0.477194	3.07942	1.00683	1.76128	0.593126	0.702082	2.39835	2.44179	2.44869	2.29313	1.66434	3.15825	2.2323
14160	b0015	chaperone Hsp40, co-chaperone with DnaK (NCBI)	-0.600975	0.937228	0.776968	1.17307	0.0407855	0.383536	0.952787	0.831112	1.0124	1.05205	0.910917	1.02934	1.0527	1.00838	0.883077	0.633953	1.06349	1.10623	1.05419	1.06939	1.03019	1.03393	1.04859	0.715795	0.765584	0.73474	0.490462	0.477585	0.984486	0.95848	0.888864	0.957861	0.689732	0.508926	0.155771	1.27171	3.54328	3.07375	0.142849	0.123901	0.814542	0.800604	0.833746	0.854318	0.71563	1.23399	5.91371
14163	b0018	regulatory protein for HokC, overlaps CDS of hokC (NCBI)	-0.190024	-0.143281	-0.107256	-0.384505	-0.191675	-0.864843	-0.0359777	-0.18264	-0.000572763	0.00798957	-0.0945388	-0.0348885	-0.0112564	-0.0992831	-0.153155	-0.409183	-0.0167077	-0.00260934	-0.0239542	-0.0177557	-0.0282547	-0.119363	-0.0915697	-0.357504	-0.448948	0.922656	-1.05383	0.270658	-0.225937	-0.25774	-0.326706	-0.372938	-0.527917	-0.80202	0.726624	0.601127	-1.01594	0.872104	-1.93427	0.62735	-0.0662998	1.35746	0.0274309	-0.152533	0.694937	-0.18807	-0.799154
14164	b0019	pH-dependent sodium/proton antiporter (NCBI)	-0.400717	1.04332	1.05729	0.843247	-0.0636424	0.428773	1.15485	1.17993	1.36111	1.2639	1.11764	1.30191	1.26914	1.34093	1.09968	1.29596	1.33651	1.29596	1.27074	1.28835	1.35864	1.30239	1.24119	0.932289	0.960131	0.898894	0.494633	0.362193	1.14864	1.12287	1.05323	0.992529	0.981191	0.588544	0.351127	-0.0587591	-0.225363	0.444257	-0.0277545	-0.0131801	0.931429	1.11046	1.0315	0.819226	0.93864	0.991747	-1.60489
14165	b0020	DNA-binding transcriptional activator (NCBI)	-0.166681	-0.235547	-0.0218973	-0.103021	-0.652316	-0.549263	-0.154602	-0.198596	-0.121056	-0.10541	-0.222166	-0.0194244	0.09353	-0.118648	-0.293661	-0.169175	-0.114405	-0.100063	-0.122001	-0.115124	0.0680818	-0.221938	-0.224907	-0.340703	-0.596475	-0.333274	-0.434737	-0.314448	-0.0830013	-0.0744415	-0.182316	-0.169348	-0.307491	-0.388444	-0.246282	-0.712149	-0.1275	-0.477692	0.218701	-0.098296	-0.170628	0.135601	-0.0687274	-0.28109	-0.306188	0.0103149	-1.86589
14173	b0028	FKBP-type peptidyl-prolyl cis-trans isomerase (rotamase) (NCBI)	-0.379321	-0.530445	-0.644485	-0.81243	-1.66449	-0.604072	-0.643794	-0.80875	-0.606795	-0.587134	-0.708033	-0.62493	-0.601389	-0.711093	-0.77184	-0.25246	-0.59212	-0.5776	-0.600061	-0.591466	-0.629704	-0.637809	-0.703137	-0.44363	-0.853046	-0.651585	-0.491508	-0.735402	-0.401353	-0.430323	-0.499606	-0.560523	-0.754072	-0.956977	-0.288408	-1.01141	-0.406393	0.146384	-0.372679	0.0316474	-0.704803	-0.656403	-0.600795	-0.809851	-0.399067	-0.805109	-0.39704
14175	b0030	ribonucleoside hydrolase 3 (NCBI)	-0.0673596	0.0112	0.150376	0.0886908	-0.925007	-0.334318	-0.0922803	-0.0739732	-0.0582597	0.118506	0.139617	-0.0832275	-0.0596448	-0.169334	0.178147	-0.337593	-0.0508181	-0.0364611	-0.0584435	0.21426	-0.0892772	-0.190642	-0.16136	-0.234524	0.0198476	-0.20581	-0.267109	0.0185779	0.0444476	0.0146963	-0.0544984	-0.115416	0.127379	0.199089	-0.00674686	0.885096	-0.27276	-0.314876	-0.745313	0.191757	-0.14423	-0.0957086	-0.03939	-0.132741	-0.573192	0.100553	-1.31715
14177	b0032	carbamoyl-phosphate synthase small subunit (NCBI)	0.0663091	-0.00753059	0.0270321	0.139589	-0.440268	-0.363445	0.424927	0.276011	0.470631	0.497169	0.369374	0.464074	0.487563	0.378138	0.317517	0.150862	0.497199	0.511921	0.488859	0.499368	0.580482	0.739478	0.386067	0.0458942	0.129233	-0.0283879	-0.420761	0.0715604	-0.0520432	-0.0822752	-0.151416	-0.101566	-0.295513	-0.589634	-0.964582	-0.527814	-0.00959471	-0.138775	0.570513	-0.434187	-0.111448	0.0664622	-0.082024	-0.189857	-0.343885	-0.225591	-0.184925
14178	b0033	carbamoyl-phosphate synthase large subunit (NCBI)	-0.222425	-0.226673	-0.216878	0.295624	-1.13031	-0.541168	0.244778	1.7666	1.23046	0.31499	1.04457	0.322159	0.355478	0.195986	0.135344	-0.00898782	0.57346	0.329979	0.306857	0.332671	0.30421	0.178043	0.229702	0.0382974	0.138873	-0.504	-0.0496937	-0.110829	-0.253737	-0.283079	-0.352321	-0.336536	-0.200531	-0.689655	-0.825041	-0.901489	0.317027	-0.0174334	-0.0388003	0.0669564	-0.379384	-0.171727	-0.34434	0.114253	-0.101112	-0.119708	0.535097
14180	b0034	transcriptional regulator of cai operon (VIMSS)	-0.0612509	1.34105	1.37138	1.29065	0.356338	0.958996	1.33829	1.55575	1.41229	1.51009	1.77003	1.45359	1.47683	1.50574	1.30767	1.10643	1.48879	1.50451	1.47851	1.49859	1.45855	1.43618	1.54673	1.22038	1.07726	1.26589	0.591878	0.524585	1.51526	1.49223	1.42229	1.37564	1.21191	1.00818	1.24554	0.345434	0.612856	1.03147	-0.0484501	-0.112922	2.01565	1.35382	1.41236	1.8197	0.797165	1.45536	0.636113
14181	b0035	possible synthesis of cofactor for carnitine racemase and dehydratase (VIMSS)	-0.148013	-0.02359	0.0111693	-0.0922606	0.25667	0.128158	0.328596	0.175525	0.372091	0.396876	0.270815	0.637249	0.386052	0.525818	0.359238	0.431148	0.395613	0.410281	0.387379	0.397376	0.358999	0.257904	0.644926	-0.0562264	0.095853	0.30102	0.293323	0.277333	0.379307	0.35109	0.281724	0.220868	0.0272457	0.0563833	-0.18705	0.249294	0.0268962	0.242703	-0.162174	0.0359787	0.422587	0.131273	0.547842	-0.0215859	-0.508122	0.144151	-1.10813
14182	b0036	crotonobetainyl CoA hydratase (RefSeq)	0.00636094	0.871527	1.13833	0.870454	0.778078	0.944652	1.01418	0.892343	1.49234	1.11333	0.972221	1.09058	1.19129	1.00474	0.944285	0.826816	1.12474	1.13995	1.11545	1.13063	1.0914	0.990801	1.13786	0.965027	0.882085	0.788752	-0.0716313	0.380662	0.943478	1.12132	0.847798	1.10134	0.823252	0.589927	0.0364069	0.277355	-0.343723	0.842985	0.115902	0.333217	1.01734	2.52181	1.02148	0.839874	0.505529	0.889974	0.290174
14183	b0037	predicted crotonobetaine CoA ligase:carnitine CoA ligase (RefSeq)	-0.00593161	0.278601	0.0798196	0.478753	0.0161545	0.140241	-0.0147202	-0.0818485	0.135422	0.0630031	-0.0684122	0.0335929	0.116326	-0.0524867	-0.113097	-0.250149	0.0672505	0.0821722	0.0585282	0.124056	0.0957292	-0.0151552	0.100519	-0.265686	-0.0345939	-0.172385	0.103968	-0.200451	0.0134131	-0.0150364	0.0652128	0.0366911	-0.228539	-0.0401766	-0.280566	0.367658	-0.145364	0.116435	0.0813438	-0.0270261	0.870672	0.0763951	0.0218673	-0.100606	0.0139667	-0.252947	0.0246946
14184	b0038	crotonobetainyl-CoA:carnitineCoA-transferase (NCBI)	0.021274	-1.07907	-0.876722	-0.646986	0.13877	-0.694783	-1.18622	-0.940543	-1.15962	-1.14923	-0.584456	-1.00955	-1.08441	-0.927329	0.217825	-1.18587	-1.16177	-1.14756	-1.1691	-1.16348	-0.9715	-0.893897	-1.27217	-1.31295	-0.896355	-1.22816	-0.937639	-0.849279	-1.08267	-1.11334	-1.18244	-1.13261	-0.863824	-0.847082	-0.78056	-0.623722	-0.30112	-0.644294	-0.269692	0.0269004	-1.29487	-1.0706	-1.08686	-0.983618	0.13637	-1.1646	0.447746
14185	b0039	crotonobetaine reductase subunit II, FAD-binding (NCBI)	0.0290589	-0.243883	0.129964	-0.17983	-0.300643	-0.205811	-0.137174	-0.161607	-0.10197	-0.0847202	-0.203118	0.0730472	-0.101242	-0.210918	0.149639	-0.302793	-0.0923026	-0.0779003	-0.100016	-0.0925629	-0.130503	0.242685	0.208685	-0.246191	-0.117275	-0.0680753	-0.553149	-0.258355	-0.165709	-0.195507	-0.264697	-0.325626	-0.518951	-0.653228	-0.692525	-0.574903	-0.699334	-0.355464	-0.0170834	-0.233723	-0.342661	-0.346661	-0.285654	-0.25037	-0.280485	-0.0471526	0.812972
14186	b0040	L-carnitine/gamma-butyrobetaine antiporter (NCBI)	-0.0788959	0.966	0.896785	0.852078	0.367587	0.484637	0.948022	0.823803	1.00641	1.0447	0.904975	1.02079	1.08302	1.01529	0.995854	0.79657	1.05479	1.06994	1.04561	1.06024	1.06439	1.01544	1.74612	0.723475	0.658203	0.819164	0.550646	0.677387	1.05494	1.02885	0.95925	0.98497	0.842928	0.477607	0.522699	0.847654	0.535346	0.612614	-0.140082	0.0859663	0.867732	0.969342	1.13362	1.39645	0.886753	1.24703	0.10024
14187	b0041	probable flavoprotein subunit, carnitine metabolism (VIMSS)	0.216658	0.361355	0.534465	-0.131652	1.05036	0.374234	0.416607	0.275155	0.465839	0.726944	0.364443	0.467074	0.490515	0.381061	0.320469	-0.0267972	0.500661	0.515568	0.491962	0.504265	0.637417	0.798859	0.38897	0.794791	0.65748	2.97342	2.67853	0.0631036	0.38928	0.361831	0.292378	0.522086	0.155623	-0.0397127	1.02319	-0.205546	-0.437732	-0.10058	-0.459265	-0.0210756	0.145069	0.67466	0.230575	0.0397478	0.641365	0.480405	0.112509
14188	b0042	predicted electron transfer flavoprotein, NAD/FAD-binding domain and ETFP adenine nucleotide-binding domain-like (NCBI)	-0.218354	0.12321	0.0678742	-0.140787	-0.356645	-0.24269	0.284996	0.414721	0.325272	0.346927	0.224067	0.310098	0.333631	0.224065	0.163367	0.144501	0.342896	0.357446	0.334892	0.343755	0.400821	0.204421	0.289102	0.180557	0.116207	0.358549	-0.422144	-0.692255	0.283875	0.254289	0.233114	0.124206	0.265051	-0.0235226	0.343223	-0.0113888	0.545288	-0.165293	-0.0753731	-0.381697	0.0504935	0.207749	0.3198	0.138521	0.202234	0.102449	0.307397
14189	b0043	predicted oxidoreductase with FAD/NAD(P)-binding domain (NCBI)	0.0385632	0.5999	0.902959	0.52875	-0.332777	0.172302	0.784875	0.511366	0.805076	0.656226	1.01983	0.624434	0.6756	0.538495	0.47789	0.720315	0.657695	0.672477	0.649239	0.660315	0.62182	0.520846	0.546418	0.299348	0.615926	0.211123	-0.227523	0.256097	0.461188	0.432947	0.363584	0.302747	0.275684	0.60793	0.00316164	0.778789	0.831337	0.603404	0.0488693	0.230328	0.454125	0.501283	0.927066	0.564174	0.325178	0.35559	-0.525816
14190	b0044	predicted 4Fe-4S ferredoxin-type protein (NCBI)	0.035345	0.271449	-0.611639	-0.966163	-0.623259	-1.01141	-0.589456	-0.780381	-0.565607	-0.558701	-0.666581	-0.606714	-0.583049	-0.692922	-0.753817	1.41539	-0.574962	-0.560925	-0.581961	-0.578	-0.615343	-0.716993	-0.179952	-0.532361	-0.672219	-0.620892	-0.881312	-0.493847	-0.370461	-0.402025	-0.471018	-0.532	-0.298101	-1.05664	-1.17046	-0.924508	-1.98658	0.790297	-0.214117	0.802422	-0.864342	-0.81439	-0.744502	-0.0268906	-1.59187	-0.735797	-0.847943
14191	b0045	predicted transporter (NCBI)	-0.149016	0.324828	0.0926484	0.00666643	-0.875941	-0.585986	0.155545	0.154995	0.19564	0.217246	0.0944222	0.180432	0.357234	0.0943775	0.322773	0.479737	0.213248	0.2278	0.205241	0.214124	0.448896	0.228281	0.332949	0.289277	-0.261382	-0.174222	-0.572836	-0.0205639	0.0760078	0.0462395	-0.0229533	-0.0838552	-0.0916582	-0.439809	0.255611	0.101381	0.701999	-0.0987222	0.596086	-0.416631	0.0532994	0.330136	0.151402	0.285252	-0.3886	0.109467	0.254758
14192	b0046	glutathione-regulated potassium-efflux system ancillary protein (NCBI)	-0.0306224	-0.444	-0.568671	-0.850745	-0.212181	0.1947	-0.777844	-0.275047	-0.605822	-0.741379	-0.85216	-0.787116	-0.763478	-0.873327	-0.934194	-0.832537	-0.75512	-0.740975	-0.762329	-0.757336	-0.400684	-0.539147	-0.26309	-0.575992	-0.41748	-0.884569	0.133987	-1.08758	-0.779443	-0.810101	-0.879196	-0.940192	-0.966327	-0.707721	0.511232	-1.02181	-0.52775	-0.0714507	0.43824	-0.00775488	-0.722986	-0.945587	-0.570009	-0.473926	-0.297271	-0.979272	-0.90309
14193	b0047	glutathione-regulated potassium-efflux system protein (NCBI)	-0.044085	-0.235557	0.0660655	-0.308367	-0.264048	-0.139231	-0.0516122	0.0889312	0.194641	0.00785759	-0.00282602	0.141766	0.153248	-0.0898761	-0.105102	1.13938	0.00329393	0.0178252	-0.00467112	0.128427	-0.0157161	0.00802745	-0.107637	0.164438	-0.11224	-0.253048	0.315401	-0.0893849	-0.0267114	-0.0563059	-0.0502324	0.0566175	-0.251023	-0.494417	-0.527754	0.0395609	-0.336595	0.205725	0.484124	0.186899	0.0961394	0.162068	0.0913231	-0.204243	0.304348	0.149914	-0.40347
14195	b0049	diadenosinetetraphosphatase (NCBI)	-1.67806	3.67886	3.70091	3.3284	1.86487	2.71599	4.05928	4.19103	4.24865	4.40764	4.14577	4.47767	4.49993	4.51101	4.33566	3.99259	4.52003	4.53955	4.50233	4.55878	4.51374	4.41738	4.40153	4.08839	3.96447	3.20046	2.74472	2.26333	3.44844	3.43258	3.36185	3.30195	3.10704	2.97947	2.81182	2.0331	2.43794	2.6633	0.528348	-0.270594	3.31515	3.35314	3.30928	3.20957	2.57583	3.86683	1.18825
14196	b0050	hypothetical protein (NCBI)	-0.0573853	-0.0330929	0.136013	-0.311316	0.379308	-0.91672	-0.214857	0.114359	-0.183575	-0.00893883	-0.0635581	-0.143103	-0.0681589	0.182469	-0.10067	-0.191875	-0.180839	-0.166573	-0.188288	-0.182135	-0.0664228	-0.191497	-0.0234064	0.0402168	-0.318606	-0.327458	-0.705824	-0.0530326	-0.0771794	-0.107748	-0.176852	-0.1184	0.0844492	-0.0954245	-0.334268	-0.216579	-0.646147	0.0771104	-0.283358	-0.0968148	-0.713197	-0.34466	-0.601083	-0.044426	-0.158749	-0.330633	-0.786629
14197	b0051	dimethyladenosine transferase (NCBI)	-0.433074	3.97863	3.99942	3.69572	2.24279	3.07902	3.79671	3.73403	3.81335	3.95147	3.7107	4.00565	4.02809	3.9217	3.86283	3.51883	4.04667	4.06546	4.03038	4.07993	4.03577	3.93868	3.92913	3.76125	3.48757	3.81084	3.02708	2.86386	4.05739	4.05025	3.97853	3.91928	3.74104	3.44363	2.79333	2.45447	1.96541	3.01127	0.986665	-0.015585	3.61493	3.64734	3.58761	3.50545	2.93985	3.38205	1.37773
14198	b0052	4-hydroxythreonine-4-phosphate dehydrogenase (NCBI)	-0.159961	0.131253	0.043749	-0.0925025	-0.0985282	0.167394	-0.000204204	0.0736798	0.449402	0.065113	-0.0598546	0.0304991	0.150767	-0.0555434	0.0394435	0.339384	0.0635707	0.0782417	0.0553356	0.0653865	0.0966347	0.183588	-0.0106587	-0.095885	-0.12418	-0.0997215	-0.169628	1.74657	-0.00044914	-0.0291712	-0.0984824	0.22254	-0.145243	-0.298314	-0.160899	-0.0201847	0.592775	-0.00932577	0.0626783	-0.176858	0.194138	0.0941334	0.246431	0.0633589	-0.137781	0.129339	-0.422378
14199	b0053	peptidyl-prolyl cis-trans isomerase (PPIase) (NCBI)	-0.0992932	3.67049	3.7243	3.34467	2.2837	3.0097	3.37238	3.33598	3.50237	3.55422	3.37681	3.59206	3.61469	3.50769	3.48409	3.1339	3.63177	3.67163	3.65434	3.72911	3.61658	3.55753	3.64602	3.45275	3.45902	8.83034	6.14459	5.82254	4.4724	4.7053	4.46116	4.36013	4.13254	3.91021	3.25704	2.99579	2.13528	3.17276	1.34299	-0.225608	3.69596	3.6939	3.62637	3.58975	2.93539	3.93478	2.08664
14201	b0055	Dna-J like membrane chaperone protein (NCBI)	-0.0458648	1.1078	1.35214	1.1872	-0.00977676	0.745923	1.1743	1.19188	1.24792	1.30446	1.14617	1.49954	1.3227	1.22097	1.15382	1.03109	1.33587	1.35211	1.32463	1.35013	1.44322	1.24218	1.2217	1.04078	1.04244	1.15322	0.497096	0.509248	1.2905	1.26561	1.19587	1.13524	1.00944	1.06084	0.43944	0.847052	0.296438	0.506319	0.281655	0.00967973	0.93665	1.05462	1.09619	0.817258	0.98822	1.28675	-0.101421
14204	b0058	pseudouridine synthase for 23S rRNA (position 746) and tRNAphe(position 32) (NCBI)	0.0877401	-0.186074	0.161811	0.0304629	0.626441	0.562167	-0.0476536	-0.0786087	-0.304618	0.415858	0.560902	-0.328067	-0.304494	-0.414224	-0.244665	-0.689539	-0.295541	-0.281146	-0.303239	-0.295857	0.121946	0.0853693	0.213885	0.105138	-0.220893	-0.222305	0.197042	-0.399511	-0.0474623	-0.0774123	0.00257412	0.366009	-0.169717	-0.253778	-0.05593	-0.564419	1.23623	-0.159309	0.0185997	0.0189663	-0.187591	-0.0206024	-0.150044	-0.205549	-0.104622	-0.0439157	-1.58902
14205	b0059	ATP-dependent helicase HepA (NCBI)	-0.370969	0.397943	0.439925	0.251261	0.164916	0.155708	0.340102	0.388959	0.38749	0.416089	0.286152	0.445429	0.455145	1.13029	0.909465	0.788509	0.418253	0.468195	0.409729	0.427421	0.464267	0.460806	0.397614	0.304311	0.396844	0.928166	0.498105	0.240949	0.495977	0.503226	0.398725	0.376995	0.490113	0.490951	0.364	0.888131	-0.416303	0.118057	-0.226676	-0.0575037	0.209864	0.0617019	0.0346049	-0.121879	-0.449816	0.516175	1.03427
14206	b0060	DNA polymerase II (NCBI)	-0.149973	-0.6189	-0.266614	-0.441177	-0.0543133	-0.333386	-0.459438	-0.272498	-0.42092	-0.398979	-0.522185	-0.433947	-0.410447	-0.520078	-0.0636025	-0.821864	-0.40078	-0.386087	-0.409049	-0.398704	-0.174902	-0.310315	-0.38467	-0.205448	-0.249598	-0.719667	-0.733428	-1.30894	-0.487033	-0.516727	-0.58593	-0.594052	-0.537823	-0.54768	-0.287099	-0.322919	0.216099	-0.387425	-0.423526	-0.0413187	-0.537026	-0.374095	-0.521979	-0.534746	-0.24959	-0.623579	0.599636
14207	b0061	L-ribulose-5-phosphate 4-epimerase (NCBI)	-0.160323	0.378549	0.412478	0.0541928	-0.418472	0.890062	0.511409	0.538443	0.553937	0.577391	0.452742	0.541829	0.565347	0.455879	0.395222	0.497963	0.574699	0.589305	0.566587	0.575979	0.537815	0.642328	0.58225	0.2963	0.558828	0.668135	2.10508	0.115145	0.677248	0.64944	0.665394	0.519234	0.710793	0.323516	-0.713024	-0.179576	-0.0250961	0.246408	-0.173176	0.306532	0.557695	0.434508	0.481761	0.764605	0.215602	0.618997	-0.859675
14210	b0064	DNA-binding transcriptional dual regulator (NCBI)	0.113966	0.134057	-0.0171947	-0.00955798	0.502449	-0.142347	0.221282	-0.0215087	-0.0146611	0.00611309	0.42989	-0.03119	-0.00765267	-0.117318	0.396469	-0.138557	0.00162995	0.0161634	-0.00633912	0.00236857	0.0882335	-0.137085	-0.109364	-0.0973536	-0.441841	0.031756	-0.395886	-0.640643	0.112647	0.0832962	0.0140566	0.0432647	-0.0699339	-0.395702	-0.537647	0.511775	-1.23377	-0.583918	-1.34781	-0.408417	-0.369177	-0.320469	-0.26223	-0.212086	-0.300087	-0.0569616	0.0442332
14211	b0065	conserved inner membrane protein (NCBI)	-0.248533	0.864416	0.944523	0.788496	0.218284	0.57039	0.99174	0.867612	1.05038	1.08848	0.948953	1.06411	1.0875	0.978325	0.917863	0.651797	1.09804	1.11316	1.08892	1.10324	1.06858	0.963599	1.22029	1.01836	0.539778	0.786177	0.0217216	-0.139403	1.03593	1.00969	0.940105	0.879406	1.00623	0.363295	0.267768	0.143693	0.219743	0.521453	0.324164	-0.0513299	0.942068	0.959891	1.08394	1.11719	0.4756	1.01158	-0.894361
14212	b0066	thiamin transporter subunit (NCBI)	-0.14936	0.203006	0.0611003	0.0154615	-0.117224	-0.453242	0.268692	0.236711	0.315596	0.344334	0.338191	0.313731	0.337185	0.227744	0.167146	0.582043	0.347193	0.362054	0.338588	0.350461	0.311742	0.285467	0.281848	0.246405	0.269264	-0.0888602	-0.0382552	-0.147708	0.1613	0.132331	0.0630487	0.00217147	-0.152328	-0.442262	-0.214966	0.296214	-0.100158	0.00299505	-0.106389	0.430159	0.234843	0.349594	0.341757	0.354678	-0.244863	0.596522	0.509552
14213	b0067	thiamin ABC transporter membrane protein (NCBI)	0.00045712	0.0418104	0.149705	-0.00554314	-0.123371	-0.0241818	0.0852314	0.176669	0.123473	0.2175	0.0223055	0.105377	0.128924	0.21329	0.159438	0.0934798	0.138059	0.152556	1.16417	0.195127	0.218355	0.0729682	0.166619	-0.0147274	-0.0392934	-0.125655	-0.0880784	-0.243649	0.124538	0.0949575	0.0439549	0.0869354	-0.0861823	0.0721731	0.129043	-0.197348	0.00553911	0.0947413	-0.363123	-0.253571	0.0731243	0.0341963	-0.0356844	0.351552	0.349158	-0.07147	-0.129555
14214	b0068	thiamin transporter subunit (NCBI)	-0.0135936	0.00413649	-0.145254	-0.0940779	-0.601892	-0.0732106	0.0496954	0.160248	0.090017	0.112102	0.336275	0.0758192	0.207648	-0.010259	0.0252165	0.256086	0.108714	0.123295	0.100652	0.109818	0.426859	0.144964	0.0945505	-0.100589	0.258257	-0.107665	0.661145	-0.0389907	0.00786572	-0.0218379	-0.00652545	-0.0733986	-0.00128536	-0.447602	-0.76518	-0.394184	0.605721	-0.135181	0.225758	-0.17301	0.00800576	0.0061194	0.11614	0.0158791	0.262277	0.112512	-0.159519
14215	b0069	DNA-binding transcriptional regulator (NCBI)	-0.0709845	-0.31262	0.166085	-0.24738	-0.0486961	-0.0855963	-0.316212	-0.357911	-0.122399	-0.27309	-0.386963	-0.316554	-0.185817	-0.0552434	-0.163797	-0.326499	-0.284374	-0.270127	-0.291785	-0.28581	-0.267434	-0.346593	-0.263718	-0.123424	-0.499104	-0.505847	-0.184165	-0.711923	-0.255542	-0.285539	-0.354707	-0.255614	-0.381526	-0.305554	0.118297	-0.139139	0.670905	-0.0857052	-0.0190492	0.244203	-0.406046	-0.0800504	-0.30375	-0.511116	-0.103626	-0.088292	-0.279326
14217	b0071	isopropylmalate isomerase small subunit (NCBI)	-0.00372295	-0.0213058	0.797718	-0.0266863	-0.104629	-0.134554	-0.0697956	0.0746658	-0.0297247	-0.00755932	0.293246	-0.0435963	0.235346	-0.12971	-0.19042	-0.457983	-0.0106432	0.00395422	-0.0187361	-0.00940734	0.461127	0.0969467	0.56256	-0.0472527	-0.586946	0.134306	-0.831567	-0.0974265	0.0309932	0.00165051	-0.0675902	-0.128501	0.2817	-0.431948	-0.0646585	-0.374737	-0.587375	-0.268044	-0.134723	0.293314	0.0205176	0.218461	0.12206	0.279209	0.0462436	0.186311	0.634639
14218	b0072	isopropylmalate isomerase large subunit (NCBI)	-0.139177	-0.42283	-0.249667	0.0381563	0.0583393	0.106014	-0.288584	-0.387041	-0.2543	-0.237666	-0.355444	-0.278088	-0.254514	-0.364212	-0.229829	-0.0366156	-0.245593	-0.231202	-0.253283	-0.245933	0.157866	-0.0462318	-0.281701	-0.0878465	-0.0692592	-0.394327	-0.542991	-0.486656	-0.279893	-0.310168	-0.379305	-0.152608	0.0722593	-0.386102	-0.564173	-0.248834	0.0557654	-0.494433	-8.55658e-05	-0.186611	-0.393676	-0.0895978	-0.321558	-0.223377	0.177536	-0.186958	-0.240027
14219	b0073	3-isopropylmalate dehydrogenase (VIMSS)	-0.0456518	-0.190296	-0.144849	-0.302383	-0.1381	-0.155806	-0.207609	-0.376158	-0.172176	-0.154622	-0.273346	-0.194445	-0.170877	-0.280574	-0.0265548	-0.688423	-0.16189	-0.147474	-0.169629	-0.162048	-0.168909	-0.146498	-0.272606	-0.364249	-0.288316	-0.404552	-0.748326	-0.756836	-0.154257	-0.18432	-0.25348	-0.258718	0.0996245	-0.409256	-0.275593	0.042519	-0.216612	0.089519	0.0389418	-0.0284147	-0.406183	-0.22858	-0.29842	0.257448	-0.229157	-0.327909	-0.391007
14220	b0074	2-isopropylmalate synthase (NCBI)	-0.0660756	-0.220632	-0.185937	-0.0895648	-0.800574	-0.523525	-0.158871	-0.322526	-0.121075	0.0156173	-0.222289	-0.138674	-0.115133	-0.128088	-0.285514	-0.261007	-0.105891	-0.0913676	-0.113838	-0.105219	-0.143404	-0.244638	0.00871737	-0.34074	0.0724568	-0.210174	-0.615429	-0.650375	-0.136141	-0.165508	-0.234746	-0.18491	-0.489128	-0.488956	-1.28805	0.714058	0.0703842	0.13797	-0.10965	-0.186191	0.180139	0.073146	0.15885	-0.0234518	-0.281069	-0.0455412	-0.92941
14221	b0075	leu operon leader peptide (NCBI)	-0.133512	0.270332	0.313351	0.00576167	-0.824118	-0.375994	0.435074	0.280906	0.478073	0.502117	0.376856	0.467096	0.490608	0.503755	0.455886	0.0785999	0.536261	0.514671	0.491872	0.501529	0.581067	0.488883	0.445444	0.478582	0.304783	0.171137	-0.339286	-0.238588	0.42125	0.391969	0.322723	0.360327	0.249962	-0.104252	-0.205318	0.209977	0.142784	0.177736	-0.330301	-0.134711	0.570925	0.326738	0.378339	0.173748	0.186313	0.47522	-0.981623
14222	b0076	probable transcriptional activator for leuABCD operon (VIMSS)	-0.112355	1.93059	1.93176	1.53208	0.464582	1.03877	1.82459	1.81899	1.91329	1.97967	1.87442	1.99801	2.02201	1.89243	1.84362	1.57382	2.01387	2.04108	2	2.02721	1.98658	1.87114	1.95953	1.62107	1.56155	2.10167	1.10457	1.17023	1.97448	1.95313	1.883	1.83096	1.7404	1.40463	0.771007	0.952316	0.748863	1.35608	0.262478	-0.0735008	1.99848	1.75344	1.77994	1.66438	1.17606	1.96003	0.457042
14224	b0078	acetolactate synthase small subunit (NCBI)	-0.138544	0.190417	-0.0415824	-0.10019	-0.584271	-0.0297236	0.104724	0.213072	0.355231	0.175595	0.0481247	0.14272	0.166204	0.0567673	-0.00385227	-0.178616	0.175903	0.39677	0.167521	0.284676	0.139824	0.397716	0.0646947	-0.0576229	-0.204435	-0.181646	-0.117949	-0.331332	0.0682821	0.041777	-0.0277854	-0.0885739	-0.232084	-0.40428	-0.790465	-0.220678	-0.374568	0.67915	0.0521466	0.000156211	-0.205942	0.144244	-0.185565	-0.173881	-0.0986446	-0.0681688	-0.960228
14226	b0080	DNA-binding transcriptional dual regulator (NCBI)	-0.303155	1.9462	4.28708	1.64606	0.429963	1.18095	1.62895	1.52549	1.69836	1.74598	1.59683	1.72881	1.75211	1.67691	1.58291	1.46894	1.76336	1.77881	1.75359	1.77106	1.73165	1.63132	1.65106	1.44511	1.19103	1.84489	1.07556	1.15843	2.09406	2.07188	2.00184	1.94139	1.74697	1.41268	1.01906	3.32327	0.561015	1.27824	-0.152493	-0.507748	1.63277	1.67724	1.69572	1.80621	0.975832	2.09246	0.612838
14227	b0081	hypothetical protein (NCBI)	-0.0458392	-0.470059	-0.0426896	0.217036	-0.875254	-0.66495	0.0673946	-0.582162	-0.376577	-0.360535	-0.477739	-0.401362	-0.377783	0.692232	-0.548326	-0.895534	-0.368875	-0.354501	-0.37653	-0.369347	-0.22533	-0.508681	-0.109396	-0.821867	-0.945757	-0.592323	-1.05972	-0.730547	-0.341978	-0.37212	-0.441272	-0.502231	-0.695528	-1.02788	-0.145777	0.179565	0.623254	0.565765	0.302158	0.306297	-0.726513	-0.677634	-0.134845	1.94418	-1.04769	-0.857709	-0.903284
14228	b0082	S-adenosyl-methyltransferase (NCBI)	0.489709	2.40842	2.4375	2.27942	0.74911	1.66321	2.28147	1.93269	2.09283	2.15285	1.99111	2.14505	2.16824	2.05963	1.99949	1.65336	2.18045	2.19633	2.16985	2.1914	2.15135	2.22998	2.06742	1.89457	1.64466	2.13305	1.55197	1.44833	2.38203	2.3604	2.2903	2.43682	2.03562	1.9345	1.19239	1.12486	1.40856	1.73539	0.118801	0.323578	2.37781	2.41986	2.41473	2.27231	1.64067	2.33035	0.270077
14234	b0088	UDP-N-acetylmuramoyl-L-alanyl-D-glutamatesynthetase (NCBI)	0.0611523	1.36089	1.39097	1.02695	-0.572419	0.752117	1.42696	1.33239	1.50078	1.5529	1.39915	1.53942	1.56268	1.45383	1.39356	2.57457	1.57437	1.58999	1.56426	1.58342	1.54366	1.44347	1.46165	1.1262	1.35478	2.30971	1.62269	1.34837	2.55728	2.55255	2.48052	2.42068	2.22239	1.88174	1.24645	3.23659	1.53015	0.854769	-1.2116	-0.00666896	1.50231	1.54359	1.53498	1.58613	0.760911	1.52217	1.28466
14238	b0092	D-alanylalanine synthetase (NCBI)	-0.277692	0.854332	0.934636	1.29703	-0.21062	0.0532989	0.575952	0.437252	0.626876	0.658449	0.525494	0.629343	0.652784	0.755763	0.482819	0.281366	0.662899	0.677808	0.654193	0.666498	0.62774	0.526862	0.551299	0.573486	0.326894	1.01261	0.437831	0.0478956	1.15282	1.08986	1.02032	1.03121	0.793848	0.717109	0.285915	1.84306	-0.13365	0.741768	0.403087	0.104398	1.32796	1.19525	1.22655	1.04427	0.720228	1.28204	0.459756
14243	b0097	orf, hypothetical protein (VIMSS)	0.154808	0.720382	0.753471	0.393971	0.00235048	0.646172	1.05673	0.947962	1.12264	1.16893	1.02101	1.1519	1.17519	1.37614	1.00571	1.52597	1.18668	1.20217	1.17684	1.19474	1.15497	1.0546	1.07392	0.737218	0.613001	0.601645	1.03516	-0.325619	0.851519	0.825457	0.755851	0.695081	0.501021	0.167382	0.35981	0.494508	1.06976	1.45203	-0.913512	-0.787566	1.11737	1.16018	1.16657	1.41125	0.378438	0.537437	-1.46783
14245	b0099	nucleoside triphosphate pyrophosphohydrolase, marked preference for dGTP (NCBI)	0.127854	-0.134894	-0.827321	-1.18434	-0.128013	-0.411523	-1.03618	-1.21812	-1.00784	-0.99632	0.670134	-1.04055	-1.01693	-0.221695	-1.18767	4.44149	-1.00836	-0.333535	-1.01571	-1.01002	-1.04777	-1.14929	-0.211935	-0.76197	-0.761116	-1.16697	0.5545	1.40345	-0.916454	-0.948157	-1.01713	-1.07816	-1.27115	-0.196854	-0.174096	0.217559	1.91269	0.940798	-0.634617	0.0459889	-0.732539	-1.38526	-1.31866	4.36813	2.37033	-1.27745	3.96758
14247	b0101	zinc-binding protein (NCBI)	-0.138212	0.798875	0.712306	1.50205	-0.133997	0.498301	0.967652	1.70683	1.04014	1.09147	0.938529	1.07767	1.10093	0.992102	2.15118	0.585429	1.11259	1.1282	1.10249	1.12159	1.08187	0.981682	0.999923	1.23876	0.540543	0.381913	0.812984	1.4545	0.631774	0.604025	0.534608	0.473875	0.664898	0.106336	0.0537938	-0.570254	-0.651411	0.214676	-1.95544	0.0655383	0.657952	4.51441	0.727654	0.552646	3.87027	0.394425	-0.624752
14248	b0102	hypothetical protein (NCBI)	0.00728342	-0.158577	-0.124874	-0.245583	0.690449	0.338953	-0.241133	-0.407559	-0.204758	-0.185983	-0.305965	-0.015327	-0.201083	-0.310781	0.151336	-0.0457202	-0.191935	-0.177458	-0.199791	-0.191621	-0.229752	-0.331036	-0.30282	-0.128761	-0.171682	-0.109873	-0.305156	-0.298809	0.0265872	-0.00284842	-0.0720789	-0.132983	0.483353	0.125812	-0.229107	0.0359949	-0.723217	-0.162067	0.179259	-0.572128	0.306061	-0.109423	-0.0628049	0.530574	-0.264373	-0.108376	0.976908
14250	b0104	guanosine 5'-monophosphate oxidoreductase (NCBI)	-0.021102	-0.0852401	-0.199168	-0.363668	-0.556255	-0.355282	-0.065993	-0.232859	-0.0296406	-0.0114321	0.106609	-0.0508306	-0.0272675	-0.0856633	0.0949136	-0.241947	-0.0182695	-0.00383635	-0.0260439	-0.0182954	0.229141	-0.020984	0.1801	0.227718	-0.0246094	-0.267357	-0.339124	-0.157879	-0.0171124	0.133518	-0.0708718	-0.131995	0.395528	-0.0342896	-0.516982	0.285275	-0.361866	-0.0430525	-0.658844	0.122039	-0.166144	0.160565	-0.0611404	-0.258562	0.431361	0.190646	-1.11447
14252	b0106	assembly protein in type IV pilin biogenesis, transmembrane protein (NCBI)	0.0366917	0.305995	0.0212247	-0.0690779	0.488158	0.321234	0.130065	0.105579	0.171751	0.194793	0.0705357	0.159104	0.272023	0.484057	0.204196	0.0822445	0.192003	0.206608	0.183894	0.193282	0.215517	0.0762981	0.113656	0.086914	-0.0151476	0.0996644	-0.172443	-0.305061	0.349683	0.320621	0.277227	0.190552	0.172213	0.0595954	0.167965	0.184959	-0.0256733	0.168351	-0.0547112	0.208849	1.05053	0.245684	0.16569	0.198811	-0.320205	0.165179	0.0531429
14253	b0107	conserved protein with nucleoside triphosphate hydrolase domain (NCBI)	0.0176706	-0.756214	-0.934029	-0.823594	-0.00361742	-0.337494	-0.871467	-0.718246	-0.846631	-0.838509	-0.947644	-0.765882	-0.575861	-0.971642	-0.758837	-0.620901	-0.853526	-0.839433	-0.860633	-0.856135	-0.893609	-0.860553	-0.69817	-0.990478	-0.305191	-1.12978	-0.952744	-0.179775	-0.879283	-0.91082	-0.979817	-1.04084	-0.755174	-0.278423	0.132681	-0.170753	-0.63391	-0.383938	-0.402647	-0.15904	-0.707613	-0.73578	-0.4374	-0.481941	-0.195329	-0.54826	-0.3347
14254	b0108	predicted major pilin subunit (NCBI)	-0.317981	0.0611388	0.094698	0.537381	-1.27065	-0.447655	0.262503	0.852266	0.302732	0.324161	0.201571	0.287087	0.310623	0.201116	0.140434	0.000987565	0.319815	0.334352	0.311838	0.320572	0.282519	0.181343	0.209068	0.240518	-0.162088	0.156419	0.491681	-0.537788	0.406481	0.377545	0.30826	0.247436	0.354283	-0.180328	-0.981978	-0.384427	-0.435861	0.518343	0.532792	-0.042457	0.306054	4.2381	0.404011	0.201083	-0.0613216	0.813557	-0.385142
14255	b0109	nicotinate-nucleotide pyrophosphorylase (NCBI)	-0.119979	-0.059409	-0.0246165	-0.170398	-0.349684	-0.256945	0.120091	0.461544	0.161952	0.185442	0.351367	0.150223	0.173736	0.0641501	0.00346169	-0.268041	0.183225	0.197855	0.175068	0.322174	0.146351	0.0452116	0.072092	-0.113566	-0.0424502	0.16705	-0.504387	-0.422748	0.417128	0.388798	0.5145	0.258601	0.0650496	0.0824458	-0.110789	-0.65887	-0.510561	0.26655	-0.529375	0.854133	0.217039	0.264546	0.311451	0.329028	0.265598	1.9849	-0.150624
14256	b0110	N-acetyl-anhydromuranmyl-L-alanine amidase (NCBI)	0.0234539	-0.529611	-0.575196	-0.900278	-1.11295	-0.898049	-0.537967	-0.553203	-0.507654	-0.494741	-0.608721	-0.538069	-0.51446	-0.562672	-0.305425	-0.663109	-0.505871	-0.491616	-0.513296	-0.33693	-0.501576	-0.543035	-0.456294	-0.958903	-0.848523	-0.420306	-0.527249	-1.11382	-0.459514	-0.490053	-0.559161	-0.620104	-0.813236	-0.287239	-0.94048	-0.24193	-1.01318	-0.408035	-0.869545	-0.196057	-0.874291	-0.524864	-0.704556	-0.913713	-1.09427	-0.455245	0.502808
14257	b0111	predicted inner membrane protein (NCBI)	-0.0744211	0.156845	0.260614	-0.0381672	-0.621044	-0.136168	0.199326	0.17375	0.246226	0.276523	0.254616	0.249323	0.429511	0.241261	0.342343	0.0699385	0.283338	0.29846	0.274252	0.288893	0.466325	0.14887	0.346842	0.415006	0.441472	0.305348	0.179639	1.32598	0.44316	0.415473	0.346047	0.315933	0.577676	0.396042	0.195196	0.375833	0.596941	-0.149188	0.0650657	0.0504626	0.147719	0.11301	0.276867	-0.033175	0.0512947	0.280571	0.177113
14258	b0112	aromatic amino acid transporter (NCBI)	0.0118456	-0.00464476	0.0894761	0.384942	0.198683	0.0970276	-0.0150472	0.111325	0.0228701	0.042658	0.0857924	1.36548	0.155292	-0.00923717	0.191425	1.2837	0.0372734	0.0517702	0.0293754	0.0377362	0.166145	0.189453	0.157756	-0.0333672	0.289281	0.129566	-0.228908	0.559287	0.0546215	0.113158	0.660103	-0.0864675	0.0161402	0.206603	0.247126	-0.371279	-0.0278718	0.0953824	-0.329393	-0.0332859	-0.0566724	-0.0451023	-0.0522199	0.045566	-0.15341	0.183654	-0.0270705
14259	b0113	transcriptional regulator of pyruvate dehydrogenase complex (NCBI)	-0.815278	0.548157	0.854041	0.223907	-0.929703	0.124686	0.634672	1.02209	0.685851	0.71778	1.20559	0.689067	0.712502	0.603135	0.542574	0.195602	0.722658	0.737589	0.713911	0.72643	0.687647	0.586794	0.61104	0.271732	0.238935	0.966354	0.203589	0.0429545	1.21606	1.18919	1.11968	1.05901	0.996478	0.532698	-0.0128318	0.135404	1.07277	0.508462	0.0151277	-0.628201	1.04643	3.24393	3.10218	0.724968	0.319639	1.25908	-0.147839
14263	b0117	hypothetical protein (NCBI)	-0.0694191	0.0307018	0.00578587	0.0608	0.0516954	-0.177707	0.142074	0.321155	0.186967	0.303835	1.73079	1.15876	1.24328	0.0947844	0.137135	0.019486	0.21409	0.263844	0.311699	0.216511	0.189321	0.217482	0.153077	-0.0113724	0.072345	0.0215982	-0.305805	-0.178219	0.167709	0.213486	0.0694791	0.118796	0.155019	-0.219379	-0.144387	0.0766626	-0.187545	0.308828	-0.255343	0.237159	0.171552	0.307104	0.161545	0.198097	0.0965658	0.33647	-0.310787
14265	b0119	orf, hypothetical protein (VIMSS)	-0.17634	0.192398	0.326177	-0.152067	-0.120346	0.370021	0.0972732	0.0665717	0.134707	0.231501	0.0335649	0.114855	0.138412	0.0288249	0.0338415	-0.0314064	0.147438	0.161894	0.139619	0.14758	0.109619	0.0083585	0.159731	-0.041187	-0.106996	0.25551	0.0351863	-0.53104	0.151534	0.12233	0.0530743	-0.00779981	-0.143754	-0.0632082	-0.0424789	-0.258643	-0.0590507	-0.380768	-0.425697	-0.0990522	-0.343449	-0.353209	-0.292669	-0.507085	-0.597079	-0.140966	0.257836
14266	b0120	S-adenosylmethionine decarboxylase proenzyme (NCBI)	-0.0539108	0.44051	0.233173	0.284995	-0.196497	0.0699405	0.329306	0.177789	0.3736	0.399098	0.707866	0.365319	0.414254	0.279308	0.34417	0.181668	0.398426	0.41312	0.390143	0.54421	0.361979	0.260911	0.287242	0.373774	0.103669	0.301454	-0.113726	-0.239673	0.551442	0.523883	0.454444	0.48487	0.540904	0.218515	-0.371271	0.212007	0.628032	0.354867	0.0911411	0.0395115	0.469985	0.461587	0.389496	0.159245	0.0220291	0.568921	0.50344
14267	b0121	spermidine synthase (NCBI)	-0.316551	0.14929	-0.11347	0.130751	0.570159	-0.241216	0.144697	-0.0131902	0.185533	0.208184	0.0843009	0.17245	0.195968	0.261366	0.0257202	-0.321279	0.205388	0.219997	0.19727	0.206718	0.243043	0.342082	0.0943498	-0.0658338	0.44339	0.00199296	0.0580742	-0.247526	0.0571937	0.0283141	-0.0409788	-0.101875	-0.295398	-0.219837	-0.538934	-0.277772	-0.252849	-0.552101	0.719922	0.0623181	0.0600741	-0.0102113	-0.156259	-0.368766	0.46905	-0.026618	-2.03884
14268	b0122	orf, hypothetical protein (VIMSS)	0.23871	0.400023	0.663466	0.0773159	0.0727309	-0.534361	0.239652	0.0782681	0.278959	0.299335	0.177869	0.261388	0.284935	0.175491	0.11482	-0.23142	0.293975	0.308469	0.286078	0.294412	0.296441	0.155339	0.183447	-0.0957318	-0.281133	0.536658	-0.181663	0.27155	0.78628	0.7588	0.689353	0.603795	0.43556	0.256089	-0.0255151	-0.582726	0.781636	0.0247213	-0.233092	-0.382881	0.337485	0.142309	0.112774	-0.0915783	-0.144175	0.59298	-0.0744213
14269	b0123	multicopper oxidase (laccase) (NCBI)	-0.012309	0.522324	0.567578	0.914384	-0.182923	0.684354	0.467457	0.409841	0.694073	0.546468	0.415174	0.594637	0.539677	0.526811	0.410752	0.395578	0.549659	0.564519	0.576123	0.617877	0.525945	0.445341	0.458555	0.429241	0.37492	0.430211	0.0980094	-0.0400033	0.453179	0.425937	0.356462	0.295652	0.239131	0.028121	0.482565	-0.0100856	0.0808938	-0.267404	-0.257491	-0.20517	0.216767	0.295831	0.263723	0.405585	0.0398689	0.59526	-0.0910622
14270	b0124	glucose dehydrogenase (NCBI)	0.0107012	-0.0196813	-0.072093	-0.0934552	-0.477602	-0.35686	-0.20719	-0.255525	-0.170933	-0.0413687	-0.138322	-0.191682	-0.168123	-0.256695	-0.227834	-0.325057	-0.159061	-0.144611	-0.166865	-0.0993956	-0.0696554	-0.183534	-0.22573	-0.110345	-0.321276	-0.170384	-0.250479	-0.28736	-0.0107367	-0.0402733	-0.084805	-0.148501	-0.247694	-0.350707	-0.682723	0.0072599	0.416818	0.0459072	-0.178824	-0.170396	-0.0976221	0.0698539	-0.0163739	-0.167182	-0.00203791	-0.168999	-0.494364
14271	b0125	hypoxanthine phosphoribosyltransferase (VIMSS)	0.0549334	2.17833	2.21901	1.99218	1.27429	1.59769	2.09102	2.02426	2.17945	2.24423	2.07769	2.24012	2.26327	2.1548	2.09474	1.74878	2.27585	2.2919	2.26491	2.28811	2.24783	2.14807	2.16257	1.83615	1.71332	1.78072	1.35735	0.851209	2.02984	2.00727	1.93727	1.87686	1.84762	1.3729	0.679035	1.09156	0.443874	1.15832	0.40381	-0.481338	1.79314	1.83748	1.85345	1.83389	1.26286	1.73032	0.0497004
14273	b0127	predicted transporter subunit: ATP-binding component of ABC superfamily (NCBI)	-0.308358	0.391915	0.228591	-0.12783	0.278262	-0.0683563	0.457754	0.559207	0.500245	0.523703	0.399028	0.488137	0.511656	0.402153	0.341486	0.188438	0.52103	0.535635	0.512918	0.522305	0.484105	0.382977	0.410097	0.690474	-0.0214257	0.289062	-0.471617	0.120203	0.539156	0.510106	0.440833	0.405291	0.39053	0.239917	-0.261178	-0.202419	0.461325	-0.332921	-0.784959	0.197313	0.488426	0.339825	0.392124	0.186736	-0.0656516	0.512528	-0.671846
14274	b0128	predicted transporter subunit: membrane component of ABC superfamily (NCBI)	0.03124	2.13377	-0.0762959	-0.867467	-1.28592	-0.694288	-0.514206	-0.490286	-0.479254	-0.461405	-0.337353	-0.500475	-0.476919	-0.586628	-0.57582	-0.792508	-0.467796	-0.453331	-0.475629	-0.29032	-0.318728	-0.606966	-0.578665	-0.591677	-0.462904	-0.671604	-0.693685	-0.646548	-0.421273	-0.451635	-0.520762	-0.581709	-0.774907	-0.479658	-0.855448	-1.23042	-0.094917	0.0541809	-0.0772489	0.0357962	-0.557481	-0.132483	-0.382136	-0.575558	-0.737031	-0.471732	0.431944
14275	b0129	predicted PTS Enzyme IIA (NCBI)	-0.052806	-1.14218	-0.936913	-1.64438	-0.527272	-0.568457	-1.15542	-0.902034	-1.13466	-0.741429	-1.2356	-0.868234	-1.15647	-1.26641	-1.00704	-1.4471	-1.14856	-1.1346	-1.1554	-1.15221	-1.01164	-1.29117	-0.717017	-1.07451	-0.426085	-1.39141	-0.585576	-1.02157	-0.797998	-1.17291	-1.24185	-0.969582	-1.49579	-0.296035	-1.24012	-1.31219	-0.685596	-0.0440077	0.452959	-0.232066	-1.01338	-0.862555	-1.19191	-1.11653	-0.969124	-0.803231	-0.751028
14276	b0130	predicted polysaccharide deacetylase lipoprotein (NCBI)	0.0852218	-0.112626	0.270235	0.31625	-0.0853943	-0.0701492	0.0287338	0.356534	0.227969	0.094089	0.426017	0.155882	0.210076	-0.0264732	0.0480282	0.0250154	0.0926626	0.10734	0.0844155	0.0945298	0.0561034	-0.0449834	0.290005	0.193474	0.0411772	0.0559736	-0.0132621	-0.435933	0.0609924	0.0309543	-0.0382084	0.256576	-0.192796	0.331108	0.259611	0.215827	-0.495313	0.102335	0.0513038	0.0336258	0.176442	-0.0912884	0.0962049	0.0828174	-0.366152	-0.0106988	0.322257
14277	b0131	aspartate 1-decarboxylase precursor (NCBI)	0.151325	-0.414059	0.172916	-0.741694	-0.389763	0.134566	-0.114279	0.317278	-0.0678532	-0.0392723	-0.169249	-0.0699933	-0.0465374	-0.156083	-0.216715	-0.564226	-0.0364805	-0.021627	-0.0450713	-0.0332791	-0.0720901	-0.173056	-0.148167	-0.488269	-0.612391	-0.0799682	0.116103	-0.225389	0.16998	0.143851	0.0742489	0.0134411	-0.180704	-0.514469	-1.22407	0.196244	1.52502	1.07847	0.391533	-0.361053	-0.160036	-0.114476	-0.0831047	-0.265545	0.357238	-0.244963	-1.18047
14278	b0132	predicted transposase (NCBI)	0.229049	-0.291019	0.0671345	0.35173	0.714476	0.305006	-0.129876	-0.620369	-0.419103	-0.0889727	-0.385032	-0.435759	-0.412229	-0.311459	-0.58263	-0.278174	-0.402855	-0.33291	-0.300605	-0.401809	-0.44013	-0.397127	-0.44631	-0.696875	-0.591929	-0.68517	-0.582467	-0.574154	-0.434872	-0.464356	-0.533582	-0.300548	-0.542432	-0.123582	-0.276635	0.0199913	0.325149	-0.12515	0.352777	0.0395824	-0.195134	-0.271296	0.13019	-0.477099	-0.153816	-0.137729	0.723811
14279	b0133	pantoate--beta-alanine ligase (NCBI)	0.0930851	0.21273	0.240901	0.246746	0.810888	0.55537	0.0618257	0.283308	0.0990849	0.118116	0.67799	0.0793312	0.102887	0.181255	0.0461154	0.416127	0.111962	0.126424	0.104133	0.112148	0.0741154	0.0240401	0.248458	0.128727	-0.202929	0.0908977	0.380828	0.479939	0.341066	0.311462	0.242251	0.312895	-0.0118501	0.406827	0.633857	-0.170233	-0.512907	-0.603142	0.672979	0.0909588	0.141166	0.0696391	0.123867	0.0621818	0.756763	0.41602	0.158541
14280	b0134	3-methyl-2-oxobutanoate hydroxymethyltransferase (NCBI)	-0.162844	-0.738142	-0.702967	-0.573397	-0.197138	0.0418068	-0.713826	0.0770574	-0.678486	-0.659801	-0.399575	-0.697923	-0.674381	-0.609239	-0.844859	-1.04081	-0.665111	-0.650594	-0.673044	-0.664454	-0.537186	-0.803976	-0.404488	-0.590057	-0.0859826	-0.0872626	-0.493646	0.14926	-0.511774	-0.540546	-0.609853	-0.670784	-0.458721	-0.900678	0.081491	-0.975357	-0.0639205	-0.195414	0.362939	0.330427	-0.759264	-0.71028	-0.649253	-0.648314	-0.968064	-0.518806	0.263491
14281	b0135	predicted fimbrial-like adhesin protein (NCBI)	-0.110685	2.0988	2.05372	1.76624	1.06451	1.42728	2.14807	2.25439	2.2841	2.40956	2.14675	2.33608	2.41649	2.30089	2.24913	2.14232	2.37325	2.38996	2.36104	2.39067	2.34909	2.28811	2.35915	2.00219	2.08058	2.30746	2.11882	1.93869	2.48096	2.46339	2.39283	2.44073	2.12842	1.92095	1.44063	1.25438	1.02464	1.74715	0.318821	0.190827	2.23796	2.24044	2.21761	2.09351	1.51192	2.16909	1.33249
14282	b0136	predicted fimbrial-like adhesin protein (NCBI)	-0.128703	4.38865	4.40274	4.02067	2.53797	3.40853	3.99254	4.13212	4.18511	4.34844	4.08221	4.42309	4.44529	4.33978	4.28137	3.9387	4.4659	4.48566	4.44771	4.50664	4.39827	4.34422	4.34709	4.16481	4.00906	4.7101	3.96729	3.75219	4.95433	4.95938	4.88631	4.82815	4.63131	4.3745	3.55181	3.294	2.55576	3.98696	1.97843	0.21122	4.43776	4.46677	4.3408	4.33193	3.65729	4.65195	1.95418
14283	b0137	predicted fimbrial-like adhesin protein (NCBI)	-0.00146244	2.35801	2.37302	2.12575	0.857785	2.07272	2.48846	2.50618	2.53189	2.62257	2.5992	2.6409	2.66377	2.55581	2.60792	2.36626	2.67897	2.69614	2.66587	2.69991	2.65764	2.63888	2.56345	2.24352	2.24583	2.5424	1.90956	2.76365	2.68715	2.70997	2.6006	2.54046	2.44018	2.17265	1.73611	1.5625	1.62402	2.42091	0.921828	-0.00125715	2.8401	2.71572	2.68373	2.57091	2.23125	2.77155	1.17269
14284	b0138	putative fimbrial-like protein (VIMSS)	-0.123788	2.75607	2.81691	2.35962	1.71477	2.10881	2.84704	2.87881	3.00112	3.06509	2.86701	3.08538	3.07737	3.04967	2.90903	2.55896	3.12329	3.14047	3.11013	3.14423	3.10238	3.05495	3.11609	2.71394	2.61267	3.03425	2.33925	2.60621	3.25026	3.23684	3.16582	3.10598	2.88622	2.6487	2.14133	1.95875	1.50573	2.27954	0.993673	-0.00263719	2.92995	3.00572	2.97062	3.20369	2.26852	3.08728	1.47492
14285	b0139	predicted outer membrane usher protein (NCBI)	0.0829743	1.52291	1.59075	1.41208	1.03422	1.02186	1.47252	1.44194	1.61013	1.59942	1.51723	1.57916	1.59335	1.64248	1.62526	1.7021	1.60057	1.61642	1.59003	1.61097	1.63283	1.5822	1.61217	1.54018	1.4387	1.605	1.50305	1.13207	1.6212	1.59926	1.59127	1.71595	1.39627	1.32046	1.01826	0.77016	0.852407	1.04282	0.220598	-0.0023934	1.50128	1.52126	1.47459	1.40416	1.10014	1.47135	0.361005
14286	b0140	predicted periplasmic pilin chaperone (NCBI)	-0.0055174	1.07243	1.1488	1.01574	1.21482	1.03727	1.08575	1.0425	1.23158	1.23547	1.10004	1.16447	1.27703	1.30461	1.31545	1.71684	1.1986	1.21383	1.18929	1.20458	1.2109	1.32531	1.32059	1.49375	1.48057	1.35484	1.39619	1.38059	1.43346	1.40869	1.33894	1.27835	1.36641	1.21126	1.09612	0.589949	0.590553	0.821971	0.159904	-0.0630504	1.44447	1.22552	1.12487	1.01094	0.502872	1.20719	0.523267
14287	b0141	predicted fimbrial-like adhesin protein (NCBI)	0.230117	3.49944	3.54351	3.21444	2.01701	2.77323	3.24987	3.28835	3.39167	3.50661	3.2893	3.54234	3.56501	3.45795	3.43343	3.20986	3.5817	3.59963	3.5671	3.61468	3.58081	3.47715	3.46549	3.35482	3.22416	3.34959	3.25174	2.96315	3.59716	3.58399	3.51295	3.54135	3.25795	3.21815	2.62931	2.11363	1.64439	2.61269	0.780957	-0.076215	3.21681	3.25022	3.21083	3.10622	2.47255	3.49047	1.14076
14289	b0143	poly(A) polymerase I (VIMSS)	-0.266246	1.37645	1.40922	1.21351	0.703035	0.579524	1.63709	1.53202	1.70582	1.75252	1.6043	1.73443	1.75775	1.71761	1.58851	1.80681	1.76888	1.78428	1.7592	1.77621	1.73689	1.63652	1.75066	1.79315	1.622	1.34493	0.80365	1.09064	1.555	1.52904	1.48593	1.39882	1.28878	1.32925	0.365322	1.01758	1.26511	1.36736	0.429619	-0.151141	1.58286	1.48831	1.48346	1.30696	1.00823	1.3566	-0.325745
14290	b0144	glutamyl-Q tRNA(Asp) synthetase (RefSeq)	-0.0608109	-0.123881	0.196441	-0.0904263	0.102299	-0.110268	-0.37613	-0.551585	-0.344279	-0.329997	0.0541279	-0.372329	-0.348731	-0.458486	-0.343025	-0.314469	-0.0977999	-0.325717	-0.34753	-0.126006	-0.378852	0.070863	-0.450504	-0.721461	-0.236291	-0.0388421	0.329615	-0.294246	0.0522588	0.0220928	-0.0470557	0.0332978	-0.235133	-0.0504012	-0.744405	-0.0343685	0.231938	0.114566	0.325894	0.089676	-0.206747	-0.234364	0.0806135	0.086658	-0.773826	0.145559	-1.01968
14291	b0145	DNA-binding transcriptional regulator of rRNA transcription, DnaK suppressor protein (NCBI)	-0.442549	2.98599	3.01263	2.6462	1.05404	2.03441	2.8701	2.88217	2.99837	3.10096	2.89613	3.12713	3.14991	3.04244	2.98298	2.56436	3.16567	3.18315	3.15194	3.08385	3.14651	3.04811	3.05004	2.72491	2.60081	3.42371	3.47376	2.48218	3.67125	3.65853	3.58745	3.44644	3.33236	2.99635	2.22761	2.19271	2.23733	3.07851	0.782607	0.0519465	3.48719	3.52376	3.46649	3.38146	2.74579	3.6561	0.996178
14292	b0146	sugar fermentation stimulation protein A (NCBI)	-0.060291	2.199	-0.704084	-0.157819	-0.501535	-0.683551	-0.684809	-0.867958	-0.656988	-0.646335	-0.403096	-0.53979	-0.667774	-0.777581	-0.604746	-1.18539	-0.659362	-0.645187	-0.66663	-0.661351	-0.698928	-0.800459	-0.567583	-0.516162	-0.808815	-0.717863	-1.17967	-0.750492	-0.535105	-0.566282	-0.635319	-0.528516	-0.591751	-1.1999	-0.496925	0.158922	0.60422	-0.53654	0.172877	0.13644	-0.472622	-0.550344	-0.707527	-0.463206	0.0350177	-0.600561	-0.423096
14293	b0147	orf, hypothetical protein (VIMSS)	-0.0469692	-0.589656	-0.38863	-0.566055	-0.412062	-0.713688	-0.542009	-0.511479	-0.515333	-0.505798	-0.61635	-0.551763	-0.528123	-0.637943	-0.698804	-0.842858	-0.519814	-0.505682	-0.527	-0.522126	-0.365366	-0.661189	-0.47534	-0.65597	-0.836002	-0.926617	-0.472432	-1.00284	-0.676122	-0.708008	-0.776966	-0.695517	-0.877429	-1.20497	-1.17393	0.356208	-0.559476	-0.567816	-0.0444337	-0.0116224	2.19683	-0.263301	-0.512905	-0.57273	-0.281591	-0.620181	-1.82561
14294	b0148	helicase, ATP-dependent (VIMSS)	0.114795	0.136436	0.203152	-0.152082	-0.60222	-0.377156	-0.00153956	0.142958	0.226288	0.168169	0.138619	0.041589	0.0440859	-0.0418409	-0.126225	-0.355226	0.0533085	0.0678356	0.0453512	0.0540016	0.135373	0.0518098	-0.0575582	-0.107902	0.0229252	1.10181	-0.13869	-0.541463	0.0592424	0.0801229	-0.0392016	-0.100082	-0.087661	-0.394382	-0.891904	0.508957	0.780809	0.0599442	0.0722123	0.296934	0.138224	0.337457	0.883091	0.274661	-0.0161277	0.0374938	0.390416
14295	b0149	penicillin-binding protein 1b (NCBI)	-2.02606	1.97553	1.23161	1.39095	0.202159	1.19081	0.453468	0.333912	0.454984	0.494693	0.406282	0.533597	0.522626	0.45628	0.321389	0.0875975	0.479517	0.494203	0.494522	0.542202	0.480221	0.346787	0.368377	0.171978	0.0865954	1.23788	0.844371	0.712349	1.48748	1.4621	1.40149	1.33179	1.23063	1.11711	0.652623	-0.22346	-0.0802979	0.345648	-0.267009	-0.287155	0.687689	0.746872	0.772339	0.635624	0.39932	1.59102	-0.0652108
14296	b0150	ferrichrome outer membrane transporter (NCBI)	-0.0815469	-0.269855	-0.188189	-0.0792491	-0.92642	-0.536045	-0.105065	6.45027	-0.0522272	-0.181536	0.385929	-0.285396	-0.165066	-0.164062	-0.0949692	-0.465658	15.4301	15.4809	15.3732	15.6693	0.754385	0.171971	0.72747	0.308366	-0.28627	-0.140543	-0.303078	0.255389	15.5151	15.6337	15.5486	1.90119	-0.0970559	-0.224798	-0.532473	-0.0868666	0.207235	-0.295263	-0.0975319	0.156202	-0.256145	-0.0750082	-0.239433	-0.156857	-0.0279572	1.37918	2.63537
14297	b0151	iron-hydroxamate transporter subunit (NCBI)	-0.193862	0.0311467	-0.167243	0.174939	-1.48032	-0.948212	0.115228	0.157595	0.151977	0.170319	0.0508489	0.376862	0.154474	0.0448776	-0.0158541	-0.0497822	0.163438	0.177867	0.155669	0.312697	0.125469	0.0241879	0.0528425	-0.020042	0.206309	-0.16807	-0.954238	-0.762675	0.0550577	0.0248435	-0.0442996	-0.105195	-0.0101818	-0.272413	-0.356176	-0.553022	0.225833	-0.112748	-0.105726	-0.362664	-0.104712	2.70066	-0.00236835	-0.209708	-0.090615	0.0202429	-0.294352
14298	b0152	iron-hydroxamate transporter subunit (NCBI)	-0.152768	-0.151458	-0.0050049	0.559578	-1.00614	-0.0369041	0.113021	-0.175472	-0.12632	0.125113	-0.227427	-0.152853	-0.129262	-0.0397449	-0.299753	-0.540676	-0.120508	-0.106182	-0.128073	-0.121351	-0.159152	-0.260543	-0.230989	-0.57331	-0.697086	-0.217893	-0.349411	-0.714803	0.0323502	0.00222172	-0.066931	-0.00352036	-0.320986	-0.489541	-0.237813	0.721016	-0.46699	-0.185478	-0.644902	0.267884	-0.0796745	0.138359	0.209195	0.184896	0.262843	0.154095	-0.765962
14299	b0153	fused iron-hydroxamate transporter subunits of ABC superfamily: membrane components (NCBI)	-0.0452554	-0.394861	-0.220772	-0.298786	0.106172	-0.324371	-0.423049	-0.527093	-0.393232	-0.380795	-0.415693	-0.424534	-0.21095	-0.446091	-0.46273	-0.132321	-0.392357	-0.378121	-0.399743	-0.393887	-0.384232	-0.150879	-0.327454	-0.141619	-0.241081	-0.353055	-0.802753	-0.617605	-0.2204	-0.250983	-0.320085	-0.113514	-0.298078	-0.17854	0.28029	-0.283916	-0.182184	-0.195833	-0.176801	0.23772	-0.391393	-0.118795	-0.333272	-0.145051	0.203787	1.69642	0.205137
14301	b0155	chloride channel protein (NCBI)	-0.0545077	0.0384976	-0.143431	-0.301709	-0.111137	-0.612114	-0.255774	-0.316282	-0.222592	-0.207122	-0.0270025	-0.248542	-0.125741	-0.266679	-0.173711	-0.162057	-0.216153	-0.201811	-0.223748	-0.21687	-0.0936608	-0.024715	-0.160082	0.0225523	-0.0393483	-0.161124	-0.456062	-0.299253	-0.180397	-0.103029	-0.279749	-0.18966	-0.101364	-0.3772	0.0167499	-0.243971	-0.628707	0.0654497	0.0244464	0.156446	0.891473	-0.208497	-0.259188	-0.00503932	0.193777	0.136088	-0.208933
14303	b0157	conserved inner membrane protein (NCBI)	-0.102448	-0.0512438	-0.0158031	-0.131822	-0.558445	0.0365043	0.0495476	-0.124736	0.0821453	0.0967319	0.842496	0.0544433	0.289351	-0.0316554	-0.0924446	0.331973	0.0867131	0.10101	0.0792044	0.085647	0.0479202	-0.0534887	-0.0236742	-0.14035	-0.489801	-0.13712	-0.467191	-0.777871	0.113168	0.0828694	0.0137357	-0.047189	-0.0428653	-0.37257	-0.780758	-0.560726	-0.531742	-0.0747616	-1.57444	-0.328441	-0.0427258	0.409363	0.0651091	0.205248	-0.329063	0.224629	-0.7942
14304	b0158	vitamin B12-transporter protein BtuF (NCBI)	-0.114589	-0.385681	-0.23506	0.140932	-0.963911	-1.12177	-0.719864	-0.906941	-0.694054	-0.685306	-0.795055	-0.731873	-0.708225	-0.818057	-0.878927	-0.515278	-0.699984	-0.685879	-0.707115	-0.702506	-0.739955	-0.774758	-0.329922	-1.06835	-1.2772	-0.850908	-0.629215	-0.374104	-0.6005	-0.631859	-0.700875	-0.761847	-0.676601	-1.14058	-1.19965	-0.0351909	1.00204	-1.47742	0.2663	0.064266	-0.648275	-0.121938	-0.741756	-0.802077	-0.66006	-0.536213	-1.17452
14306	b0160	deoxyguanosinetriphosphate triphosphohydrolase (NCBI)	-0.0804377	0.770666	1.15515	0.659847	0.261214	0.473315	0.88036	0.83138	0.957635	0.990657	0.851775	0.952036	0.991874	0.878169	0.91892	0.866088	0.987538	1.00271	0.98646	0.998954	0.973726	0.942538	0.903549	0.698916	0.668293	0.970566	0.727091	0.329467	0.972055	0.958697	0.88906	0.83476	0.778299	0.468615	0.246069	0.528347	0.236656	0.677496	-0.0252323	0.0837757	0.958992	0.882318	0.927176	0.772076	0.706602	0.963292	0.0982987
14307	b0161	serine endoprotease (protease Do), membrane-associated (NCBI)	-0.598236	1.63287	1.85116	1.5352	0.340697	1.0141	1.60097	1.48909	1.67402	1.70969	1.65947	1.7106	1.70274	1.62502	1.69571	1.21838	1.76562	1.76099	1.79812	1.75408	1.71444	1.67318	1.65476	1.289	1.30516	1.966	1.49238	1.16732	2.1982	2.17706	2.10691	2.04654	1.82652	1.84771	1.21824	0.638722	0.717052	0.966312	0.392051	0.26453	1.63724	1.64488	1.76662	1.48923	1.04607	2.04789	-0.418542
14308	b0162	orf, hypothetical protein (VIMSS)	-0.102557	-0.766842	0.0822157	-0.677495	0.0857425	-1.08343	-0.523911	-0.684886	-0.485065	-0.463295	-0.58634	-0.499136	-0.47562	-0.585284	-0.335245	-0.872636	-0.466113	-0.451493	-0.474247	-0.464678	-0.433045	-0.338905	-0.577339	-0.811676	-0.677069	-0.761677	-1.36002	-0.824317	-0.650396	-0.400528	-0.749627	-0.810605	-0.672091	-0.125318	-1.10191	0.529811	-0.515647	-0.668809	0.196115	0.078142	-0.511608	-0.539564	-0.208766	-0.615264	-0.427615	-0.614122	-0.636177
14309	b0163	hypothetical protein (NCBI)	0.0793029	-0.718873	-0.683204	0.314975	0.146307	-0.943887	0.209769	-0.714695	-0.506273	-0.4931	-0.607362	-8.2243e-05	-0.512638	-0.622406	-0.683224	-0.813411	-0.504013	-0.48975	4.63197	-0.505329	0.0611404	-0.644516	0.0321048	-0.365868	-0.485271	-0.712154	-0.743582	-0.149211	-0.461796	-0.492161	-0.365761	-0.62225	-0.815485	-0.934155	-1.17862	1.11046	-0.254212	0.630942	-0.593416	0.0589138	-0.687273	-0.305805	-0.583947	0.469254	-1.08054	-0.85206	0.0595167
14310	b0164	orf, hypothetical protein (VIMSS)	0.0274854	0.708389	0.742167	0.765632	-0.453336	0.143553	0.749386	0.626888	0.808256	0.930829	0.706726	0.825849	0.849203	0.739951	0.67949	0.645551	0.860134	0.875385	0.850766	0.866369	0.826991	0.93994	0.907294	0.884817	0.413091	0.680054	0.200968	0.373349	0.929961	0.902318	0.83289	0.772129	0.578582	0.413462	0.305975	0.485169	0.0747472	0.0073787	0.7099	-0.50088	0.674054	3.61594	0.724604	0.939607	0.340906	1.00373	-0.442899
14313	b0167	PII uridylyl-transferase (NCBI)	-0.616278	1.93118	1.95074	2.42527	0.608597	0.948936	2.30867	2.33545	2.44121	2.55485	2.33859	2.59563	2.6182	2.51068	2.45137	2.10387	2.63626	2.65462	2.62086	2.6666	2.62201	2.52427	2.51818	2.19577	2.39529	2.18784	1.40986	1.24634	2.43163	2.42033	2.3496	2.28942	2.09378	1.75745	1.49113	1.23195	0.299494	2.16717	-0.225056	-0.98222	1.71	1.75216	1.75047	1.60428	1.8202	2.13209	-0.51959
14324	b0178	periplasmic chaperone (NCBI)	0.284997	0.657182	0.689709	0.328986	0.187933	0.125381	0.894518	0.777514	0.956385	0.998569	0.854813	0.978051	1.00139	0.892179	0.831745	0.839419	1.01247	1.02779	1.00297	1.01921	0.979734	1.42425	0.900039	0.562491	1.53244	0.69886	0.915484	1.71567	0.948624	0.923639	0.853912	0.793185	1.10791	0.264892	1.51775	1.21459	2.05779	0.89745	0.0479096	0.514999	1.73618	1.43346	1.45816	1.81148	0.852923	0.691924	-0.994046
14329	b0183	ribonuclease HII (NCBI)	0.0898395	0.308661	0.352533	-0.00408983	-0.913534	-0.417219	0.0634216	-0.092822	0.103034	0.127441	0.00424315	0.0835494	0.0981362	0.00631079	0.294288	0.521547	0.120219	0.134709	0.105385	0.112211	0.0831345	-0.0130276	0.011531	0.611156	-0.275496	0.233807	0.636765	-0.312085	0.449871	0.4213	0.380462	0.691296	0.26877	-0.0543499	-0.497522	0.567319	-0.233538	0.0691638	-0.724958	0.185332	0.912986	0.382822	0.8559	0.235251	-0.236541	0.241054	0.0858104
14332	b0186	lysine decarboxylase 2, constitutive (NCBI)	-0.0903262	-0.364883	-0.371686	-0.465312	-0.790512	-0.492992	-0.565178	-0.603304	-0.642809	-0.544947	-0.741466	0.577573	-0.662383	-0.514949	-0.728967	-0.551981	-0.640956	-0.626752	-0.622318	-0.651129	-0.679762	-0.717487	-0.55	-0.530953	0.612089	-0.732121	-0.864992	-0.509101	-0.535012	-0.545779	-0.540768	-0.606338	-0.506497	-0.423855	-0.0464296	-0.227362	-0.259289	-0.409884	-0.366899	-0.00775488	0.830267	-0.46504	-0.34172	-0.305386	0.10063	-0.312089	-0.0227574
14333	b0187	orf, hypothetical protein (VIMSS)	0.0226205	-0.209272	-0.164151	-0.518881	0.493339	0.0602359	-0.157898	0.178405	0.544859	-0.118498	-0.225129	-0.159846	-0.145185	-0.237142	-0.307151	-0.644935	-0.123786	-0.109584	-0.13806	-0.133988	-0.179436	0.193601	-0.231887	0.193529	0.567231	0.282263	-0.315917	0.380574	0.0890699	0.0783716	0.0376846	-0.0426143	-0.221224	0.168029	-0.371471	-1.0157	0.513415	0.724158	-0.133754	-0.177216	-0.297174	0.294452	-0.185149	-0.406619	-0.370149	0.131124	-1.36478
14335	b0189	orf, hypothetical protein (VIMSS)	0.0922673	-0.0732763	-0.1187	-0.473566	-0.371555	0.883523	0.100038	-0.0919166	0.137242	0.150238	0.740352	0.112637	0.214811	0.0329901	-0.0252351	0.444528	0.148994	0.163367	0.134387	0.140086	0.0944561	0.0151002	0.0407117	0.134957	0.221369	0.40177	0.0668122	0.1589	0.0406421	0.0301959	-0.0105192	-0.0709752	-0.26944	-0.356357	0.0725493	-0.267763	-0.318162	-0.529585	0.335304	-0.203018	-0.0394075	0.211836	0.0678175	0.42507	-0.776341	-0.162177	0.600405
14336	b0190	hypothetical protein (NCBI)	0.170914	-0.463352	-0.524075	-0.412316	-0.0740532	0.0544183	-0.603839	-0.46391	-0.579513	-0.569284	-0.662429	-0.624155	-0.609438	-0.70396	-0.470993	-0.142347	-0.588585	-0.574605	-0.602424	-0.600475	-0.645991	-0.503076	-0.354548	-0.53789	-0.284366	-0.209251	-0.145228	-0.853572	-0.599338	-0.611245	-0.458504	-0.38476	-0.645193	-0.299713	0.341974	-0.731982	0.108793	-0.510332	-1.20891	-0.0468057	-0.800794	-0.820807	-0.741968	-0.0902633	-1.21377	-0.51871	-0.0562815
14337	b0191	hypothetical protein (NCBI)	-0.632173	-0.401278	-0.35545	-0.246047	0.226566	0.0385741	0.741997	-0.211793	0.0215862	0.0391653	-0.0614457	-0.0102085	0.00444486	-0.0899252	0.153797	-0.488189	0.0258706	0.040101	0.0115422	0.0158792	0.199419	-0.115113	-0.0821861	-0.422409	-0.1138	0.270433	-0.950973	-0.659745	-0.0360028	-0.0466962	-0.087384	-0.147884	-0.0365428	0.563084	0.218182	0.523365	1.06558	-0.2104	-0.873397	0.464693	-0.12163	-0.0827402	-0.00366954	-0.231184	0.445777	0.173811	-1.41379
14338	b0192	lipoprotein involved with copper homeostasis and adhesion (NCBI)	0.0145767	0.0440169	0.36014	0.296808	0.702026	0.618411	0.124513	0.203032	0.161497	0.183068	0.0783991	0.136774	0.15139	0.0570981	0.11147	-0.0177245	0.173148	0.187521	0.158541	0.164242	0.118106	0.0331437	0.0648199	-0.177445	-0.124931	-0.0712898	-0.391764	-0.27621	0.12172	0.111919	0.0711319	0.0106691	0.0712328	0.0250805	0.145188	-0.471983	0.288678	0.302624	-0.232652	0.158224	0.271537	0.393373	0.370202	0.150815	0.624607	0.527537	0.0856632
14339	b0193	orf, hypothetical protein (VIMSS)	0.108501	0.0949101	0.258035	-0.0526108	0.776918	0.296228	0.151326	0.382494	0.188632	0.217277	0.113033	0.176663	0.191313	0.346757	0.0829077	0.229895	0.212317	0.226697	0.200084	0.208715	0.585283	0.0781295	0.229781	-0.0611498	0.0040604	0.216682	0.305597	0.0276451	0.402454	0.400152	0.362452	0.345667	0.430718	0.514543	0.228884	-0.446284	0.245067	-0.0884818	-0.429699	-0.322287	0.248211	0.16035	0.234881	0.111456	0.104023	0.171747	-0.230398
14341	b0195	hypothetical protein (NCBI)	-0.173647	-0.234904	-0.0837053	-0.537342	-0.319288	-0.307166	-0.123004	-0.326612	-0.0918945	-0.0756224	-0.181137	-0.125941	-0.111277	-0.0389224	-0.0638914	-0.584145	-0.0899475	-0.0757593	-0.104193	-0.100257	-0.146098	-0.225152	-0.19793	0.262949	-0.345528	0.120383	-0.79299	-0.83078	0.120478	0.110146	0.0694184	0.0193256	-0.200436	0.454274	-0.223914	-0.368197	-0.362944	-0.467088	1.00821	0.19005	-0.16013	-0.138551	-0.0480745	0.0788863	-0.269264	0.270213	-1.08222
14342	b0196	predicted outer membrane protein, signal (NCBI)	0.0491698	-0.486413	-0.195681	-0.7745	-0.768311	-0.33502	-0.470969	-0.676934	-0.441178	-0.433609	-0.52423	-0.476561	-0.448668	-0.362298	-0.623933	-0.381748	-0.445932	-0.431825	-0.457629	-0.450999	-0.496432	-0.57601	-0.545915	-0.523128	-1.03255	-0.486276	-0.567986	-0.800401	-0.304103	-0.308491	-0.344838	-0.405375	-0.429312	-0.585043	0.158689	-0.0515675	-1.16741	0.70661	-0.134999	-0.651323	-0.572979	-0.270422	-0.134255	-0.690149	-0.843458	-0.0597102	-1.19386
14343	b0197	DL-methionine transporter subunit (NCBI)	-0.0637194	0.517523	0.194216	0.205693	0.561031	0.0801006	0.156222	0.255283	0.379207	0.434243	0.113996	0.179452	0.207255	0.402074	0.0323623	0.506612	0.21078	0.225237	0.198399	0.208373	0.162415	0.125044	0.391425	0.439502	-0.0720708	0.19594	0.0841709	-0.110378	0.377784	0.375529	0.794778	0.278552	0.0613762	0.366465	0.567946	-0.243269	0.401559	0.186578	0.110116	-0.0720273	0.564787	0.395633	0.590098	0.595911	0.0512673	0.349044	0.345657
14344	b0198	DL-methionine transporter subunit (NCBI)	0.0525837	-0.670282	-0.561086	-0.472015	0.163816	-0.122525	-0.888184	-0.7478	-0.859534	-0.852601	-0.7264	-0.895766	-0.645018	-0.625276	-0.563211	-0.665642	-0.865135	-0.851031	-0.876825	-0.870208	-0.824477	-0.721886	-0.965135	-0.906837	-0.838112	-0.75513	-0.176328	-0.723581	-0.903808	-0.908324	-0.895121	-0.956118	-0.541609	-1.07413	-0.800076	-0.278902	-0.655261	-0.872349	-0.0475919	0.148655	-1.0891	-0.348302	-0.727725	-0.609087	0.365843	-0.494615	0.0450326
14345	b0199	DL-methionine transporter subunit (NCBI)	0.0383504	-0.473529	-0.783865	-0.532379	0.285104	-0.426437	-0.78166	-0.870205	-0.751897	-0.740093	-0.83776	-0.790626	-0.758177	-0.666937	-0.811116	-0.942483	-0.754556	-0.740363	-0.768808	-0.750589	-0.709235	-0.802633	-0.856648	-0.443925	-0.597974	-0.934937	-0.828838	-0.646391	-0.759927	-0.770386	-0.810676	-0.770684	-0.862999	-0.874481	-0.489332	-0.280752	0.157979	-0.299329	0.0338182	-0.264712	-0.800632	-0.851609	-0.697798	-0.522312	-0.35388	-0.740059	-0.101911
14347	b0207	2,5-diketo-D-gluconate reductase B (NCBI)	0.176382	-0.56796	-0.508562	0.24071	-0.142291	-0.169595	-0.4107	-0.611526	-0.382283	-0.372454	-0.468072	-0.424983	-0.392506	-0.48877	-0.563126	-0.221546	-0.389177	-0.375089	-0.403226	-0.386034	-0.428615	-0.521494	-0.17358	-0.537084	-0.108674	0.0739004	-0.62949	-0.0323341	-0.366025	-0.377372	-0.318667	-0.46815	-0.411049	-0.575663	-0.949463	-0.369675	-0.768474	-0.355164	-0.115682	-0.319615	-0.244719	0.0830556	-0.30605	-0.447736	-0.602082	-0.611409	0.142509
14348	b0208	predicted DNA-binding transcriptional regulator (NCBI)	-0.100533	-0.110288	-0.133564	0.039538	0.251229	-0.381715	-0.0459946	0.331541	-0.010405	0.00227561	-0.0935112	-0.0413168	-0.00897178	0.299689	-0.18401	0.122874	-0.0058561	0.00842677	-0.0178988	-0.00958099	-0.055247	0.608404	-0.106094	-0.0697845	0.079877	0.157078	0.687877	0.492739	0.17441	0.171231	0.13475	3.16807	-0.142735	0.57378	0.247966	-0.337321	1.36777	-0.0496758	-0.470095	0.0718515	0.0542107	0.361367	0.151402	0.190494	0.0334606	0.144017	-0.224922
14349	b0209	hypothetical protein (NCBI)	-0.0692031	0.121228	0.178117	-0.0537136	0.210112	-0.0942193	0.566775	0.101664	0.280615	0.321777	0.194236	0.297143	0.329261	0.233533	0.388336	0.2648	0.336002	0.351514	0.319205	0.350279	0.509985	0.213346	0.231193	0.412598	0.335373	0.181645	0.435692	0.469899	0.353889	0.347319	0.306594	0.256153	0.230203	-0.0157945	-0.283034	0.704054	0.196115	0.611157	-0.660661	0.135891	0.0997824	0.136504	0.185103	-0.0213182	0.473079	0.494127	-0.266877
14350	b0210	predicted S-adenosyl-L-methionine-dependent methyltransferase (NCBI)	0.00702854	0.731724	0.172101	0.705962	0.908423	-0.819618	0.865	-0.0657501	0.147579	0.165341	0.064357	0.125742	0.158039	0.0530043	-0.016894	-0.317296	0.161621	0.176091	5.05436	0.15932	0.113295	0.034037	0.0609467	-0.28006	-0.413555	0.324648	0.54487	0.066704	0.488338	0.486028	0.449451	0.389042	0.171842	0.584104	-0.59519	0.869263	2.0569	1.36315	-0.401537	-0.00775488	0.231369	0.663954	0.320422	0.112039	0.151932	1.08351	0.577014
14351	b0211	predicted membrane-bound lytic murein transglycosylase D (NCBI)	-0.0304839	0.0159933	0.0843977	0.490153	0.102056	0.114768	0.194417	0.24734	0.243152	0.0685355	-0.0374263	2.60343	0.0659776	0.417007	0.0519719	-0.266205	0.0701776	0.0849029	2.62439	0.0698886	0.365282	0.131078	-0.0310614	-0.0108147	-0.0358705	0.474214	0.343289	-0.313177	0.192545	0.192857	0.155981	0.218704	0.203349	0.52285	0.302871	-0.854192	-0.831624	0.0562929	0.209013	-0.0543656	0.127794	0.0439392	0.00538056	-0.202814	1.15878	0.100438	0.183781
14352	b0212	predicted hydroxyacylglutathione hydrolase (NCBI)	0.479429	2.48856	2.55183	2.18036	1.67043	1.66569	1.80914	1.86479	1.88039	1.9241	1.79699	1.9036	1.93567	1.83155	1.77132	1.79698	1.94098	1.95631	1.92688	1.95942	1.89827	1.81993	1.83939	1.50326	1.57073	1.8091	1.02249	1.01469	1.9719	1.97444	1.9362	1.87732	1.65969	1.35784	0.628084	0.466727	1.97888	1.11005	0.329284	0.594142	1.71399	1.73358	1.78039	1.59483	1.4538	2.33066	-0.298644
14353	b0213	orf, hypothetical protein (VIMSS)	-0.0065787	-0.384152	-0.347228	-0.693081	-0.656694	-0.135842	-0.271047	-0.647686	-0.616098	-0.599239	-0.183242	-0.650445	-0.613543	-0.709763	-0.118299	-1.08747	-0.609496	-0.595128	-0.624089	-0.604207	0.0153957	-0.651371	0.0609869	-0.777965	-0.440687	-0.347356	0.366933	0.231256	-0.444179	-0.442733	-0.494383	-0.559256	-0.760722	-0.598539	-0.344713	0.960316	-0.94285	-0.783368	0.177452	-0.12729	-0.75264	-0.612157	-0.644435	-0.87173	-0.8337	-0.284191	0.264911
14356	b0217	predicted aminopeptidase (NCBI)	-0.133524	2.86262	2.94064	2.7128	1.08281	2.19396	2.89687	2.90364	3.03167	3.13967	2.94392	3.15917	3.19523	3.10149	3.01942	3.16661	3.20647	3.22412	3.18546	3.23681	3.18269	3.11981	3.09888	2.94316	2.95915	2.92389	2.50081	2.15325	3.09858	3.10638	3.0565	2.99429	2.90177	2.4739	1.89223	1.68133	1.87632	2.6908	1.16568	0.168055	2.9961	2.9892	3.34442	2.85427	2.59391	2.92534	0.581395
14357	b0218	predicted inner membrane protein (RefSeq)	-0.412084	2.71971	2.78027	2.42783	1.78618	1.80877	2.68802	2.6393	2.79548	2.87607	3.25166	2.87273	2.90907	2.81465	3.11804	2.99021	2.91782	2.93437	2.89895	2.93967	2.87676	2.80311	2.81217	2.54848	2.75924	2.51081	1.84544	1.98437	2.68627	2.68854	2.63928	2.57674	2.65257	2.05285	1.3407	1.3068	0.915492	2.03712	0.686667	-0.232754	2.31063	2.31886	2.354	2.18505	1.56406	2.95085	1.76413
14358	b0219	predicted C-N hydrolase family amidase, NAD(P)-binding (NCBI)	0.052856	0.639878	0.707927	1.17357	1.0419	0.24538	0.483896	0.316976	0.529957	0.555672	1.89501	0.510727	0.547558	0.451634	0.523903	0.0746236	0.552157	0.5668	0.537022	0.559519	0.499206	0.534185	0.449392	0.0760532	-0.0312682	0.318466	-0.450449	0.0175135	0.495395	0.488554	0.440307	0.37711	0.174224	0.626343	-0.319165	-0.718953	0.260618	0.547649	-0.13285	-0.0795625	0.641613	0.534982	0.61617	0.396646	-0.219863	0.864911	-1.16712
14359	b0220	inhibitor of vertebrate C-lysozyme (NCBI)	0.170194	-0.00547849	0.351394	0.0985305	-0.337578	0.670644	0.252883	0.0797915	0.295776	0.318424	0.209157	0.271056	0.303354	0.195986	0.126926	-0.171074	0.312212	0.34493	0.297299	0.318706	0.258645	0.18306	0.305752	-0.0936848	-0.188797	1.47797	0.913652	0.647642	0.747359	0.74346	0.694886	0.63182	0.742394	0.859689	0.335614	-0.0391673	0.519769	-0.0801374	-0.132362	-1.10889	0.599244	0.442491	0.524419	0.464097	-0.317175	0.264361	-0.929657
14360	b0221	putative acyl-CoA dehydrogenase (EC 1.3.99.-) (VIMSS)	-0.0297191	0.180883	0.184985	0.14425	0.10748	0.219053	0.0196736	-0.00375177	0.0594389	0.0762932	-0.0299795	0.0281737	0.0552345	-0.0416948	-0.0471376	-0.168725	0.0719764	0.0864259	0.0596096	0.164238	0.0821847	0.0568805	0.0662059	-0.0331526	-0.0270245	0.136677	-0.0786967	0.131962	0.170271	0.223344	0.100302	0.0636002	0.156551	0.264128	0.145404	0.146447	-0.11357	0.132382	0.00494584	-0.1954	-0.0341971	0.0227589	0.908113	-0.0918767	-0.0507437	0.261531	-0.364285
14361	b0222	phosphoheptose isomerase (NCBI)	-0.890732	3.1096	3.15549	8.1665	2.84229	2.19726	11.3984	12.0117	13.9292	13.6851	13.6393	7.60121	3.81472	3.55272	3.29529	3.80358	7.04903	3.49566	3.45819	3.7272	3.44442	3.37759	3.37545	3.00239	2.87216	15.3877	15.4353	15.7681	4.15771	4.19527	4.13901	5.47069	4.05099	3.54003	3.12522	4.87052	8.90794	8.58458	5.18475	3.4732	3.14401	2.94306	2.96496	2.81952	2.18357	13.6896	11.437
14362	b0223	predicted amidotransfease (NCBI)	-0.0282938	-0.620154	-0.600765	-0.519874	-0.134038	-0.754452	-0.764478	-0.971622	-0.74329	-0.729052	-0.553959	-0.796399	-0.76577	-0.638405	-0.184253	0.507894	-0.749885	-0.735904	-0.761841	-0.370522	-0.191523	-0.877481	-0.574412	-0.477305	-0.21028	-0.821839	-1.17275	-0.735413	-0.653218	-0.658698	-0.710041	-0.576047	-0.785467	-0.403754	0.148283	-1.105	-0.0599561	-0.270022	-0.439939	-0.011026	-0.514236	-0.857323	-0.745981	-0.68424	-0.606517	-0.570865	0.17386
14363	b0224	hypothetical protein (NCBI)	0.0205481	0.232499	0.451466	0.0658093	0.0665543	0.0851587	0.218007	0.0573546	0.262408	0.473464	0.178317	0.249405	0.279816	0.409956	0.372025	0.11318	0.297707	0.312543	0.284087	0.301439	0.245648	0.460667	0.512844	0.445144	0.624896	0.254662	0.703111	0.281465	0.422719	0.422754	0.455497	0.31601	1.46162	0.306401	0.131789	-0.0763486	-0.0854782	0.46797	-0.425458	-0.0283161	0.5156	0.717016	0.524172	0.745296	0.545523	0.453119	0.00234054
14364	b0225	predicted toxin of the YafQ-DinJ toxin-antitoxin system (NCBI)	0.0735627	1.85928	1.90271	1.70491	0.895037	0.956766	1.49826	1.41584	1.58201	1.65651	1.49734	1.63834	1.66837	1.56466	1.50865	1.38676	1.68975	1.70609	1.67319	1.70512	1.64681	1.57849	1.5897	1.78457	1.06772	2.07353	1.25101	1.31803	2.24027	2.24695	2.19426	2.11684	1.95911	1.89087	0.992678	1.07543	1.00615	1.03775	-0.0461503	-0.00354697	1.6629	2.23457	1.71445	1.5471	0.936235	1.79539	2.29087
14365	b0226	predicted antitoxin of YafQ-DinJ toxin-antitoxin system (NCBI)	0.419455	1.30074	1.25665	0.933133	-0.137227	0.403347	1.28416	1.15946	1.35223	1.39276	1.26258	1.35567	1.39039	1.1701	1.22816	1.12931	1.40884	1.4241	1.39487	1.41258	1.36515	1.29082	1.44144	1.32466	0.643903	1.18749	0.397871	0.600867	1.47145	1.45764	1.40616	1.24778	1.14313	1.487	1.16414	0.024713	-0.274755	0.622909	-0.419309	-0.122859	0.950324	1.00987	1.08205	1.08369	0.632344	1.16024	-0.655831
14366	b0227	predicted lipoprotein and C40 family peptidase (NCBI)	0.1942	0.174376	-0.0332234	0.774051	1.24663	-0.147203	-0.297852	0.0023776	-0.260077	-0.245645	-0.349493	-0.301985	-0.267042	0.314186	-0.430537	-0.342592	-0.250396	-0.235999	-0.262661	-0.253236	-0.299642	-0.37487	-0.347611	-0.151623	-0.718196	-0.355668	2.09871	-0.318267	-0.17505	-0.193854	-0.0939715	-0.301249	-0.507624	0.118507	-1.04324	-0.547987	1.39619	-0.316483	-1.157	0.284278	-0.284091	-0.271413	-0.185294	-0.402191	-0.12054	0.0453965	-1.5158
14367	b0228	hypothetical protein (NCBI)	-0.062951	-0.35949	-0.320062	-0.211191	-0.0627684	0.114639	-0.263188	-0.0185109	-0.233465	-0.22711	-0.33103	0.26321	-0.25504	-0.364284	2.83676	-0.561522	-0.239191	-0.22511	-0.25084	-0.244454	-0.29023	-0.365704	-0.335644	-0.357402	-0.870587	-0.313829	-1.14415	-0.411311	-0.145385	-0.149783	-0.201246	-0.123967	-0.479638	0.378985	-0.403275	0.66434	-1.48274	-0.970693	0.55586	-0.206601	0.133074	-0.171783	0.0731714	0.123112	0.146483	-0.499436	-1.06902
14368	b0229	flagellar biosynthesis (VIMSS)	0.0340928	-0.70239	-0.49743	-0.274715	-0.180285	-0.705866	-0.587264	-0.169808	-0.557929	-0.322543	-0.169427	-0.482854	-0.56613	-0.677694	-0.727742	-0.729016	-0.549507	-0.53522	-0.562057	-0.417378	-0.455305	-0.15624	-0.645686	-0.775155	-0.601407	-0.502904	-0.835867	-0.919199	-0.514062	-0.515467	-0.567265	-0.492618	-0.188723	-0.330922	-0.238546	-0.376816	-0.467037	-0.583005	-0.27943	0.0919827	-0.640376	-0.42826	-0.759915	-0.742856	-0.957302	0.0820865	0.210538
14369	b0230	putative motility protein (VIMSS)	0.0458506	-0.601552	-0.610483	-0.755899	-0.661612	-0.295142	-0.543824	-0.738263	-0.513458	-0.503704	-0.310478	-0.577784	-0.536966	-0.644395	-0.309273	-0.761414	-0.517539	-0.503538	-0.525985	-0.510653	-0.56761	-0.479163	-0.410071	-0.624315	-0.77205	-0.124462	-0.382413	-0.562894	-0.339091	-0.355511	-0.391424	-0.463647	-0.0821716	-0.462849	-0.631193	0.20791	-1.44883	-0.466032	0.592075	-0.314224	-0.545454	-0.303573	-0.405662	-0.615662	-1.18587	-0.247889	-0.227352
14370	b0231	DNA polymerase IV (NCBI)	-0.0708578	-0.35314	2.79883	-0.738012	-1.0916	-0.607657	-0.57021	-0.757753	-0.53646	-0.523214	0.194018	-0.594341	-0.55356	-0.660937	-0.601522	0.148307	-0.533783	-0.519638	-0.542507	-0.52579	-0.371392	-0.657779	-0.624138	-0.700219	-0.781523	-0.448045	-0.551357	-0.131939	-0.489007	-0.504687	-0.540683	-0.317715	-0.356107	-0.568088	-0.556058	0.00877914	-0.239757	-0.390978	0.237162	-0.0195847	-0.0987283	-0.384318	-0.3609	-0.532406	-0.210187	-0.401795	-0.773439
14372	b0233	predicted toxin of the YafO-YafN toxin-antitoxin system (NCBI)	-0.222597	3.37752	3.41341	3.0283	1.74787	2.46758	2.96841	3.03428	3.10669	3.19541	3.01471	3.20277	3.24138	3.13859	3.09246	2.76609	3.26645	3.28148	3.25145	3.29967	3.23187	3.16636	3.16352	2.78618	2.64599	3.11864	2.56014	2.47947	3.27484	3.27158	3.48285	3.17964	3.21393	2.90813	2.0096	2.37646	2.02526	2.80146	1.19288	0.693534	3.33259	3.32368	3.31904	3.19074	2.57012	3.0724	1.78348
14374	b0235	hypothetical protein (RefSeq)	0.219456	1.05261	1.18803	0.864127	-0.40612	0.463652	1.00261	0.95954	1.13059	1.10355	1.16063	1.11411	1.09301	0.986239	0.982189	0.787313	1.1149	1.12998	1.10434	1.13005	1.07139	0.997501	1.06073	0.669796	0.7188	1.16649	0.551068	0.525951	1.27493	1.37787	1.22718	1.15529	1.12892	0.798041	0.508639	0.458303	0.134713	0.695833	0.382209	0.118193	1.25024	1.12144	1.14165	2.01551	0.466516	1.41909	-0.248603
14375	b0236	peptide chain release factor 2 (NCBI)	-0.253635	-0.783445	-0.738511	-0.377048	-0.603216	-1.49197	-0.469566	0.0160358	-0.422576	-0.424066	-0.528227	-0.496222	-0.455427	-0.562794	-0.60539	-0.333082	-0.439618	-0.421714	-0.444421	-0.428247	-0.485333	-0.49344	-0.525989	-0.932421	-0.479068	0.0952237	-1.17056	-1.29389	-0.310386	-0.325659	0.116855	-0.43388	-0.0510933	-0.941575	-0.108917	-0.558902	-0.287831	-1.21775	-0.851856	-0.874711	-0.806249	-0.502014	-0.129995	-0.905906	-1.03011	-0.338935	1.4227
14376	b0237	aminoacyl-histidine dipeptidase (peptidase D) (NCBI)	-0.187539	1.08098	1.17318	0.945588	0.172431	0.328028	1.10759	1.09822	1.1816	1.20932	1.07912	1.22334	1.19773	1.08675	1.16396	0.874434	1.2075	1.23124	1.20202	1.31987	1.16575	1.22625	1.11866	0.846539	1.1653	1.2196	0.745222	0.330153	1.37719	1.37972	1.32748	1.32946	1.25275	1.15926	0.480932	0.764776	0.408182	0.982728	-0.27155	-0.0141961	1.46372	1.26023	1.41155	1.14955	1.12302	1.55156	0.589712
14377	b0238	xanthine phosphoribosyltransferase (NCBI)	0.257514	-0.133665	-0.0948007	-0.431545	-0.241589	0.911248	0.151258	0.462743	0.193393	0.197972	0.0889764	0.137047	0.173736	0.0645925	0.486766	-0.287986	0.186001	0.204228	0.177995	0.186005	0.139962	0.0646396	0.0932119	-0.301651	-0.0316936	-0.315535	0.353535	-1.2996	-0.147107	-0.150603	-0.202166	-0.280342	-0.150922	-0.446339	-0.376358	0.151836	-1.68411	-0.290705	-0.698295	0.158893	-0.597536	-0.560393	-0.453946	-0.213527	0.521907	-0.163705	1.08145
14378	b0239	fermentation/respiration switch protein (NCBI)	-0.116673	-0.509465	-0.0174605	-0.230944	-0.379119	-0.130905	-0.434148	-0.351393	-0.124721	-0.38849	-0.327482	-0.449087	-0.412405	-0.52165	-0.57602	-0.551578	-0.400009	-0.381755	-0.408062	-0.399794	-0.446011	-0.110942	-0.493033	-0.651482	-0.8477	-0.0558035	-0.560459	-0.576789	-0.365036	-0.369008	-0.182047	-0.498716	-0.0358363	-0.342047	-1.21598	0.0688212	-0.624757	-0.0475497	-0.264918	-0.0877325	-0.337576	-0.487594	-0.436726	-0.373491	-0.39206	0.0788808	-0.0918257
14379	b0240	DNA-binding transcriptional regulator (NCBI)	0.293702	0.6825	0.362548	-0.251557	0.459604	0.272022	0.257052	0.20615	0.322141	0.34444	0.220715	0.338573	0.40338	0.681116	0.214819	0.852725	0.337192	0.360781	0.332022	0.35034	0.294363	0.469602	0.321417	-0.0491631	0.519411	2.19068	0.292801	0.132361	0.332811	0.335812	0.283505	0.408486	0.558516	0.54541	-0.106352	-0.052218	-0.221114	0.0179054	-0.0235973	-0.335872	0.155266	-0.000571364	0.105898	-0.116279	-0.326795	0.347147	0.522807
14380	b0241	outer membrane phosphoporin protein E (NCBI)	-0.102211	0.68577	0.648631	0.544981	0.495364	0.282266	0.679726	0.651835	0.856847	0.79153	0.846921	0.84008	0.803142	0.812126	0.694679	0.732346	0.866114	0.828137	0.798025	0.818769	0.851883	0.787017	0.885083	0.491215	0.399886	0.788003	0.683551	0.875299	0.838341	0.841029	0.77321	0.801513	0.791354	0.622592	0.220656	0.304028	0.448845	0.260899	-0.0510626	0.195484	0.549106	0.603565	0.73147	0.607364	0.184651	0.837065	0.42936
14381	b0242	gamma-glutamyl kinase (NCBI)	0.211159	0.0523754	0.0894567	0.919185	-0.231269	-0.56724	-0.241972	0.632333	-0.191348	-0.176093	-0.287686	-0.228776	-0.192204	0.268189	-0.355534	0.199486	-0.178752	-0.160063	-0.187649	-0.175162	-0.222205	-0.297178	0.0167662	-0.246916	-0.589382	0.261839	-0.422417	-0.432176	0.429977	0.429301	0.361858	0.326441	0.405064	0.296089	0.296374	-0.864656	-0.468168	-0.484466	0.535665	-0.471559	-0.300176	-0.283486	-0.180289	-0.400044	-0.117024	0.172489	0.0986058
14382	b0243	gamma-glutamyl phosphate reductase (NCBI)	0.103538	0.452388	0.493771	0.465813	0.26544	0.206483	0.195105	0.0656057	0.243803	0.255619	0.147574	0.199049	0.235675	0.246047	0.0723089	0.401162	0.248557	0.267029	0.240075	0.3368	0.2039	0.153012	0.168658	0.235742	0.273678	0.51769	0.0799208	0.108896	0.681115	0.679666	0.612312	0.727409	0.355227	0.126341	0.132418	0.019189	-0.258777	0.482469	-0.225679	0.267248	0.522356	0.557445	0.636539	0.639936	0.38473	0.608928	1.73039
14383	b0245	CP4-6 prophage; toxin of the YkfI-YafW toxin-antitoxin system (NCBI)	-0.0436837	0.274433	-0.574292	-0.0194192	-0.725438	-0.00418485	-0.976741	-0.218159	-0.948553	-0.952758	-0.426034	-0.437721	-0.682141	-0.747866	-1.13775	0.255361	-0.973187	-0.955276	-0.98057	-0.975585	-0.756591	-0.788797	-0.758491	-0.669281	-0.294427	-0.218449	0.389384	-0.588623	-0.561715	-0.565445	-0.544531	-0.45812	-0.804033	0.116613	-0.0911671	-0.937032	-1.61206	-1.05618	-0.855258	-0.162962	-1.09574	-0.714703	-0.96166	-1.19265	-0.564709	-0.846211	0.22631
14384	b0246	CP4-6 prophage; antitoxin of the YkfI-YafW toxin-antitoxin system (NCBI)	0.00170481	0.0171373	-0.0406355	0.125592	0.632591	0.835717	-0.0373504	-0.217818	0.00479231	0.0131963	0.504918	-0.0459176	-0.00926168	0.653243	-0.0494187	0.312906	0.00331941	0.021676	-0.00493656	0.00431814	-0.0419728	-0.0342533	-0.0762794	-0.38531	0.324731	-0.24814	-0.123869	0.0862728	-0.0957637	-0.0986703	-0.151493	0.158935	-0.417681	-0.479833	0.799532	-0.394481	-1.37164	0.0284184	0.080062	-0.201336	-0.0750014	-0.044901	-0.123301	-0.348255	-0.647751	0.0846598	1.44819
14385	b0247	CP4-6 prophage; predicted DNA repair protein (NCBI)	0.183332	-0.477216	-0.431426	1.48138	0.699751	0.97088	-0.690422	-0.866931	-0.661669	-0.670358	-0.741013	-0.761391	-0.7044	-0.798963	-0.828951	-1.0386	-0.715722	-0.693309	-0.71405	-0.710014	-0.727883	-0.797401	-0.763837	-1.10176	-1.15496	-0.474777	-1.15954	0.148406	-0.344442	-0.362497	-0.400326	-0.446606	-0.612955	-0.8609	-1.37462	-1.38999	-1.3046	-0.889566	-0.1496	0.312954	-0.446483	-0.411459	-0.312585	-0.507846	-0.988309	-0.439151	-0.279605
14386	b0248	CP4-6 prophage; predicted protein (NCBI)	0.405332	-0.76338	-0.265629	-1.07789	-0.716293	0.459641	-0.772899	-0.214802	-0.740505	-0.737094	-0.827031	-0.822712	-0.765813	-0.881867	-0.918672	-0.244947	-0.762521	-0.739682	-0.761554	-0.755097	-0.800507	-0.0142232	-0.846501	-0.478373	0.25026	-0.496098	-1.13931	-1.74306	-0.753063	-0.65832	-0.808103	-0.869125	-1.07361	-1.10522	-1.09505	-0.939111	0.616293	-0.491016	-0.967284	0.274002	-0.753553	-0.718879	-0.605245	-0.746018	-0.15762	-0.700393	-1.17592
14387	b0249	CP4-6 prophage; predicted protein (NCBI)	-0.136168	-0.3281	0.532176	0.832122	-1.22866	-0.335544	-0.16225	-0.351564	-0.118307	-0.109842	1.79497	-0.19309	-0.140608	-0.259672	-0.299817	-0.598296	-0.136543	-0.118668	-0.136571	-0.124818	-0.170748	-0.249798	-0.220136	-0.632225	0.190795	-0.259577	-1.10484	1.13354	-0.105103	-0.121368	-0.159396	-0.220379	-0.425022	0.968237	-0.261635	-1.24732	-1.16609	-0.652228	-1.07393	-0.140629	-0.0785816	-0.0255899	0.0737508	0.741682	-0.773446	-0.064869	-1.61184
14388	b0250	CP4-6 prophage; predicted protein (NCBI)	0.0118379	-1.69423	-1.65686	-0.917693	0.82751	0.227805	0.328782	-1.57524	-1.34013	-1.34374	-1.42656	-0.151041	0.730902	-0.319169	0.465822	-0.649185	-1.37497	-1.35237	-1.37353	-1.3694	-0.160949	-1.49064	-1.45853	-0.496026	-0.574054	-0.647152	-0.189141	0.0181897	-1.27047	-1.27584	-1.32839	-0.065023	-1.59441	0.417615	0.535212	-1.78622	-0.0235768	-0.364488	0.0532106	-0.0262714	-0.877109	-1.55079	-1.43165	-0.574931	-2.29061	-0.518253	-0.729708
14389	b0251	CP4-6 prophage; predicted DNA-binding transcriptional regulator (RefSeq)	0.228416	-1.68057	-1.633	-1.134	1.20216	-0.450087	-1.46284	-1.68041	-1.43375	-1.43838	-1.51661	-1.53141	-0.437616	-1.59815	-1.63847	-0.368813	-1.47577	-1.45834	-1.47493	-1.46742	-1.51219	-1.59211	-1.55522	-0.960029	-0.397826	-1.64252	-2.48221	-0.845741	-1.48772	-1.50652	-1.54427	-1.60538	-0.675726	-1.0143	0.263036	1.16463	-0.192084	-1.21451	0.305016	0.552027	-1.8062	-1.75137	-1.63425	-1.86264	-0.477416	-1.52585	-1.9742
14390	b0252	orf, hypothetical protein (VIMSS)	0.0889342	-0.79048	-0.727166	0.0622719	0.262386	0.150465	-0.61294	-0.442597	-0.575647	-0.221956	-0.651308	-0.641127	-0.601682	-0.624832	-0.74926	-0.687377	-0.591033	-0.577066	-0.59239	-0.580181	-0.627314	-0.706969	-0.669882	-1.09332	-0.521214	-0.586171	-1.03368	-0.656937	-0.464064	-0.463557	-0.506388	-0.103737	-0.286081	0.32922	0.401391	-0.0257174	0.322953	-0.276877	-0.769498	0.463872	-0.54588	-0.583189	-0.502562	-0.689831	0.229243	-0.601967	0.041638
14391	b0253	putative GTP-binding protein (VIMSS)	0.0737318	-0.00629026	-0.160952	-0.0349032	0.197386	0.206158	0.0502702	-0.306715	0.0387329	-0.069239	-0.156114	-0.0798837	-0.0391344	-0.225733	-0.139044	-0.232344	-0.0812135	-0.0673266	-0.0865286	-0.0695218	-0.116805	-0.157449	-0.117422	-0.166267	-0.0359739	0.246891	-0.45505	0.277381	1.92094	0.0967252	0.0829232	0.299447	0.174986	0.346368	0.635683	0.278806	-0.197777	-0.136777	-0.473237	-0.285916	0.235898	0.131607	-0.181924	-0.0183035	0.109047	-0.142735	-0.250148
14392	b0254	CP4-6 prophage; predicted DNA-binding transcriptional regulator (NCBI)	0.0971169	0.478785	0.301948	0.308184	2.06266	0.592452	0.264197	0.287724	0.318492	0.344451	0.242574	0.280784	0.662153	0.324161	0.250839	-0.154076	0.332044	0.346574	0.329586	0.34719	0.341918	0.507017	0.308131	2.8284	0.116208	0.253712	-0.112573	0.260963	0.342294	0.346405	0.30317	0.2733	0.423884	0.0163011	0.552823	0.334937	-0.370112	0.0951815	0.088871	0.285788	0.548573	0.455381	0.233287	0.480696	0.951133	0.326774	0.437109
14396	b0258	orf, hypothetical protein (VIMSS)	0.291449	0.111352	0.192582	0.247534	0.204252	0.123033	0.973181	0.469962	0.254717	0.278169	0.485107	0.212386	0.251712	0.629894	0.104657	0.679245	0.263385	0.277812	0.261127	0.277739	0.22994	0.15072	0.336462	0.526966	0.230277	-0.0853925	0.207295	0.0360922	-0.00258905	0.000175395	0.00327424	0.226687	0.35323	-0.410325	0.00929825	0.325437	0.396627	0.0509159	0.230806	0.147377	0.0376121	0.653211	-0.120629	2.34273	0.221532	0.459253	1.13046
14398	b0260	putative amino acid/amine transport protein (VIMSS)	0.0140363	-0.226163	-0.0775633	0.700484	0.379465	0.600872	0.0104279	0.0909345	0.0569739	0.0726275	-0.0201881	0.00186614	0.0412521	0.505363	0.373557	0.395341	0.0523845	0.0717347	0.0505806	0.0719036	0.624212	0.478874	0.0225807	0.106942	0.149153	0.0753763	-0.446627	-0.0693016	0.00204643	0.00385989	-0.0479676	0.0860668	0.0132952	0.633116	-0.280144	0.444784	-0.679678	-0.153102	-0.300405	-0.184733	-0.0924359	-0.0402205	0.225603	0.420614	-0.0606668	0.0871859	0.760729
14399	b0261	homocysteine methyltransferase (NCBI)	-0.0555775	-0.115999	-0.249	-0.31723	-1.05211	0.0605576	-0.0495398	-0.229261	0.000615181	0.0110847	-0.0886909	0.0963384	-0.0160924	0.147185	0.171284	-0.0976891	-0.0141386	0.00617785	-0.0167766	0.000774592	-0.0452678	-0.124193	-0.0955056	0.105138	-0.446473	-7.01292e-05	-0.600682	-0.903598	0.00262169	-0.0163137	0.0145655	0.0407122	-0.304837	-0.144404	-0.334085	1.32712	0.0111241	0.500225	0.598988	0.101122	0.239443	-0.196282	-0.00248498	0.0805478	-0.380098	-0.0600027	0.571187
14400	b0262	putative ATP-binding component of a transport system (VIMSS)	0.0368918	-0.108633	-0.0340427	0.0469215	-0.0722455	-0.559491	-0.153767	0.054189	-0.102328	-0.08146	0.0667631	-0.1478	-0.108469	0.0695508	-0.255697	-0.189498	-0.0967629	-0.077197	-0.0989851	-0.075588	-0.0244802	-0.046983	0.316133	0.030523	-0.0886401	0.0392635	0.907003	-0.144538	-0.202449	-0.200359	-0.244512	-0.275375	-0.335807	0.0379767	-0.0130034	0.483574	-0.0767664	0.0341085	0.183117	-0.136587	0.183471	0.0212137	-0.108033	-0.11044	0.163904	-0.302569	-0.568078
14401	b0263	CP4-6 prophage; predicted ferric trasnporter subunit (RefSeq)	0.157519	0.732067	0.782946	1.23879	0.361333	0.70013	0.546011	0.393515	0.601111	0.624384	0.525435	0.560382	0.603389	0.501494	0.45161	0.892373	0.6104	0.63001	0.608086	0.631894	0.585954	0.507275	0.530728	0.799769	0.482639	0.501579	0.445997	-0.0947672	0.659807	0.642859	0.57456	0.553577	0.346035	0.0459035	-0.650585	-0.300876	0.607667	0.333808	1.12232	0.470833	1.10575	0.919376	0.971128	0.814957	1.64231	0.741205	-1.78152
14404	b0266	orf, hypothetical protein (VIMSS)	-0.0337508	0.0948949	-0.342824	0.232965	-0.806294	-1.12359	-0.172349	-0.168798	-0.130391	-0.118905	-0.205875	-0.0615294	-0.148709	-0.0852321	0.516396	0.376029	-0.142642	-0.12344	-0.144157	-0.0126834	0.116865	-0.143712	-0.161085	-0.0397795	0.0435506	0.134946	-0.589224	-0.514977	-0.162357	-0.18193	-0.249938	-0.271083	-0.0715614	0.0971878	0.0149855	0.448068	-0.0043678	-0.164667	-0.613747	-0.202274	-0.330552	0.0220051	-0.209971	0.392432	0.493807	-0.19163	0.78148
14405	b0267	CP4-6 prophage; predicted DNA-binding transcriptional regulator (NCBI)	-0.104482	-0.48004	-0.177419	-0.569121	0.117142	0.0180243	-0.0385826	-0.25409	-0.193621	-0.185081	-0.276705	-0.134219	-0.11501	-0.208197	0.0560385	-0.0819748	-0.211788	-0.191534	-0.214303	-0.197347	-0.00704168	-0.318743	-0.194902	-0.428246	-0.591852	-0.403416	-0.916188	-0.267983	-0.248951	-0.169406	-0.336425	-0.364122	-0.572755	0.369468	0.200619	1.06121	3.74631	-0.478972	-0.761325	0.11634	-0.0350013	-0.201905	-0.345931	-0.288971	0.70477	-0.101461	0.107563
14406	b0268	2-keto-3-deoxy gluconate (KDG) aldolase; CP4-6 prophage (NCBI)	0.00542765	-0.135553	0.177056	-0.222349	-0.512879	-0.558846	-0.153348	-0.065385	-0.108807	-0.0948548	-0.178101	3.33795	-0.122721	-0.224802	-0.0400128	-0.29951	-0.0304915	-0.0971433	-0.118133	-0.0973393	-0.142783	-0.0934838	-0.195529	-0.00950273	0.0072924	0.56156	-0.568002	-0.913251	-0.0522495	-0.0716958	-0.139718	-0.0818437	0.0805354	-0.252032	0.361345	1.23749	0.117378	0.0380921	-0.32423	-0.169201	0.666745	-0.27661	-0.0156328	0.0776926	1.24059	-0.322213	0.229762
14407	b0269	CP4-6 prophage; predicted dehydratase (NCBI)	-0.133983	-0.339207	-0.28112	-0.283286	-0.322501	-0.272329	-0.250479	-0.420015	-0.204448	-0.188966	-0.273768	-0.0980565	-0.0598403	-0.285957	-0.121669	-0.454706	-0.209129	-0.189772	-0.210945	-0.151701	-0.235104	-0.259464	-0.0401832	-0.159359	0.0625075	-0.225173	-0.680844	-0.567037	-0.0667217	-0.0678078	-0.135017	-0.173654	-0.381287	0.0754035	0.268681	0.963601	-0.67427	0.752222	-0.999861	0.13077	0.688771	0.161821	-0.227988	-0.0754079	1.07835	-0.072105	0.104564
14408	b0270	CP4-6 prophage; predicted sugar transporter (NCBI)	0.241943	0.0483668	0.228725	-0.000533789	0.172111	0.0662451	0.06155	0.305978	0.107003	0.121652	0.322069	0.05117	0.0895178	0.241873	-0.0577825	0.17187	0.100568	0.114727	0.0988331	0.11982	0.0655195	0.0754009	0.192637	-0.0464123	0.332088	-0.00431889	-0.322544	-0.500797	0.154165	0.135464	0.0673596	0.0462658	-0.153134	-0.00302406	-0.247137	1.52359	0.220566	0.386989	-0.391979	0.281457	0.636412	0.350451	0.0942898	0.330109	1.36584	0.0104081	-0.0636673
14409	b0271	CP4-6 prophage; predicted xylosidase/arabinosidase (NCBI)	-0.0212265	-0.407564	-0.395666	-0.625021	0.0566097	-0.563411	-0.665949	-0.488705	-0.626991	-0.617782	-0.535741	-0.692177	-0.653785	-0.751262	-0.652441	-0.08796	-0.643096	-0.629111	-0.644489	-0.493142	-0.342525	-0.572327	-0.531327	-0.612314	-0.466781	-0.656841	-1.10803	-0.527641	-0.625843	-0.64558	-0.71357	-0.695563	-0.761668	-0.544666	0.241025	1.07723	-0.795241	-0.260624	0.166722	-0.0474089	-0.337405	-0.160288	-0.611228	-0.185741	0.298008	-0.352274	-0.612997
14410	b0272	CP4-6 prophage; predicted DNA-binding transcriptional regulator (NCBI)	-0.12964	0.17374	-0.0453649	0.229466	-0.832543	-0.108883	0.154006	-0.00703484	0.207068	0.214187	0.132906	0.159104	0.32978	0.340694	0.320202	0.601013	0.2099	0.224224	0.199019	0.325726	0.483453	0.47216	0.240523	-0.0811942	0.500906	-0.0712144	-0.136987	0.0139672	0.111974	0.0931955	0.0250996	0.288647	0.581942	0.484096	0.418668	0.0184314	0.0735141	0.781172	0.0879213	-0.103149	0.408661	0.381478	0.585648	0.0280009	1.14019	-0.0108585	0.391316
14411	b0273	CP4-6 prophage; ornithine carbamoyltransferase 2, chain F (NCBI)	0.00206172	-0.648389	-0.595426	-0.127809	-0.155864	0.0639436	-0.566695	-0.750133	-0.525147	-0.528582	0.615639	-0.591906	-0.552455	-0.649963	-0.700057	0.344957	-0.541869	-0.52793	-0.551997	-0.531229	-0.569465	-0.656091	-0.300239	-0.518819	-0.400434	-0.505236	-1.19064	-0.834898	-0.321906	-0.341524	-0.409527	-0.432727	0.0269178	-0.964482	0.184046	1.51369	-0.725307	-0.638355	-0.110892	0.345062	0.217175	-0.481147	-0.414561	-0.382661	-0.575972	-0.641784	-1.08853
14414	b0276	CP4-6 prophage; predicted protein (RefSeq)	0.0440925	0.304527	0.277153	0.451878	1.10865	0.566635	0.357093	0.537257	0.417749	0.63252	0.535324	0.388436	0.431375	0.772683	0.807206	0.698906	0.444024	0.45891	0.440308	0.463179	0.41663	0.826157	0.378853	0.476911	0.453701	0.510094	0.676512	0.568557	0.596707	0.583517	0.511864	0.594173	0.590467	0.557384	0.499232	0.831938	0.755444	0.463872	-0.645813	0.0927836	0.610838	0.446189	0.657439	2.85925	0.398448	0.402617	0.124881
14415	b0277	CP4-6 prophage; conserved protein (NCBI)	0.232178	0.684825	0.572664	0.618355	1.09781	0.820748	0.674942	0.654438	0.830818	0.972529	0.86301	0.788736	0.792334	0.863473	1.01874	1.43137	0.770546	0.785268	0.76069	0.818087	0.903552	0.98511	0.881059	1.13538	1.1622	0.834697	1.15719	0.947532	0.796783	0.796196	0.756691	0.8173	0.73426	0.383353	0.74164	0.802209	0.105928	0.545146	0.123916	0.0114966	0.761642	0.692561	0.941739	0.742978	0.693694	0.790462	0.247398
14416	b0278	CP4-6 prophage; DNA-binding protein (NCBI)	0.145316	3.064	3.15582	2.70439	1.89419	2.3183	2.92077	2.58901	2.74264	2.8343	2.66737	2.83604	2.87463	2.77348	2.6658	2.67784	2.89788	2.91539	2.87615	2.93723	3.13649	2.93661	2.74358	2.66322	2.51558	2.98731	2.39566	2.16907	3.12279	3.12182	3.04881	3.0001	2.80903	2.41398	2.12211	1.80546	1.27945	2.19372	0.459115	0.229866	2.73416	2.77827	3.66665	2.67273	2.37145	3.05241	0.682518
14418	b0280	CP4-6 prophage; predicted protein (NCBI)	-0.0536834	1.3099	1.32158	1.72222	1.1125	0.802191	1.07325	0.946091	1.32443	1.16696	1.06979	1.12339	1.16261	1.22256	1.01587	1.0359	1.18024	1.19524	1.16335	1.20027	1.13803	1.05733	1.07399	1.13421	1.07083	1.40561	1.701	1.48368	1.49561	1.48492	1.41299	1.4715	1.31007	1.44657	1.2141	0.646354	0.35331	0.513188	-0.315808	0.233995	1.05573	1.10639	1.81085	1.11555	1.05976	1.39777	1.27509
14419	b0281	CP4-6 prophage; predicted phage integrase (NCBI)	0.0140988	0.525842	0.430049	0.538186	0.599094	0.273205	0.323836	0.147199	0.234963	0.24824	0.320466	0.245292	0.2336	0.283038	0.484166	0.853621	0.241704	0.255804	0.23142	0.261515	0.293004	0.411115	0.471225	0.465879	0.402356	0.339961	0.775302	0.311394	0.525928	0.509035	0.456406	0.43295	0.333114	0.237246	-0.258401	-0.031662	-0.47002	0.048589	-0.0138544	-0.295103	0.154943	0.458691	0.195244	0.349288	-0.325616	0.346531	-0.50207
14421	b0283	hypothetical protein (NCBI)	0.0158007	-0.0526556	0.232539	0.211568	0.731054	0.652231	-0.362627	-0.0367017	-0.326203	-0.305905	-0.383162	0.169411	0.0295347	-0.424203	0.0460359	0.536522	-0.331491	-0.317131	-0.338611	-0.308605	-0.350968	1.24198	0.479774	0.0665072	0.132029	-0.248194	0.274208	0.0727899	-0.164863	-0.162908	-0.199826	0.105278	0.043877	0.397509	0.439828	0.682223	-0.0835958	0.225257	0.000115102	0.21432	-0.0239309	0.00127332	-0.236354	-0.100765	0.231469	-0.242295	-0.58695
14422	b0284	predicted oxidoreductase with molybdenum-binding domain (NCBI)	0.01483	-0.317932	-0.33346	-0.179915	0.460856	0.239702	-0.329178	-0.498999	0.132859	-0.273376	0.0306131	-0.0886116	-0.179323	-0.434563	-0.0831066	0.266289	-0.288235	-0.274473	-0.297856	-0.271006	-0.337582	0.0469161	-0.146723	-0.0820977	0.108477	-0.387406	0.103406	0.067446	-0.361172	-0.359934	-0.396771	-0.343878	-0.170644	-0.102566	0.214557	-0.224124	-0.0130296	-0.0605028	0.0367978	-0.124251	-0.208082	-0.236236	-0.438534	0.423995	0.36099	0.00332719	0.371458
14423	b0285	predicted oxidoreductase with FAD-binding domain (NCBI)	0.0405367	-1.20657	-1.13872	-0.935101	0.322066	-0.203698	-1.15804	-0.541564	-1.13094	-1.11868	-0.738041	-1.18707	-0.871168	-1.0931	-1.13281	-0.66731	-1.13977	-1.12627	-1.15816	-1.03151	-0.420767	-1.26349	-0.879274	-0.706998	-0.64893	-0.921622	-0.872395	-0.872197	-1.02106	-1.01903	-1.05924	-0.854535	-0.873078	-0.831162	-0.665705	-1.01597	-0.804739	-0.177816	0.0226046	-0.319033	-1.10399	-1.15107	-1.06401	-1.28045	-0.273367	-0.992755	0.666057
14424	b0286	predicted xanthine dehydrogenase, 2Fe-2S subunit (NCBI)	-0.12495	0.412444	0.282311	-0.310234	0.736575	0.176882	0.205741	-0.0445754	-0.136207	-0.111212	-0.199815	-0.169971	0.106127	0.0260291	0.111958	0.384276	-0.121757	-0.107812	-0.141009	-0.103128	-0.170042	-0.252754	-0.247942	0.624917	0.535504	0.307692	0.462369	0.736759	0.0260794	0.0310002	-0.00952958	-0.0640876	0.0487284	1.08388	0.573067	0.2858	-0.530105	-0.499767	0.00824348	0.2259	-0.3363	-0.132275	0.230781	-0.422431	-0.0300695	-0.035848	-0.184907
14425	b0287	conserved inner membrane protein (NCBI)	0.166453	0.869519	1.02469	0.864171	0.851307	0.712484	1.00985	0.914605	1.08389	1.1924	1.0198	1.10741	1.20048	1.24574	1.07109	1.2326	1.15817	1.23785	1.1365	1.25191	1.26214	1.15676	1.11271	1.25383	1.30541	1.17623	1.05761	0.922259	1.03754	1.04854	1.09579	0.94658	1.04451	0.952962	1.01288	0.642269	0.859939	0.237626	-0.0928036	-0.0604403	0.796127	0.709888	0.673026	0.749519	0.519987	1.14029	0.0611036
14426	b0288	predicted ferredoxin (NCBI)	0.041853	-0.104818	-0.102357	0.20847	0.688476	-0.0329464	-0.221312	-0.211809	-0.0770098	-0.14052	0.0576233	-0.0258712	0.0932035	0.421002	0.342658	1.07853	-0.155218	-0.140516	-0.113773	-0.137075	0.0589143	0.135085	0.46613	0.541444	0.639235	0.302638	0.304213	0.0881931	-0.0519575	-0.0483584	-0.105114	-0.0470144	-0.0360558	0.213565	0.0888857	-0.544396	-0.284001	-0.636788	-0.100667	-0.0399169	-0.169616	-0.0699736	-0.267149	-0.0563358	0.00463137	-0.398112	-0.306278
14427	b0289	orf, hypothetical protein (VIMSS)	0.0438324	0.402462	0.227412	-0.178753	-0.887665	-0.727767	-0.334584	-0.538722	-0.297655	-0.2812	-0.35784	-0.35142	-0.315926	-0.445099	-0.108512	-0.0225448	-0.308429	-0.294273	-0.321733	-0.294477	-0.37324	0.171971	-0.425784	1.00153	0.112651	-0.493786	0.0256224	0.308187	-0.319131	-0.318199	-0.374656	-0.425805	-0.0598509	-0.448614	-0.0897804	0.600094	0.153705	-0.776307	-0.98967	-0.323059	-0.137727	0.0184763	-0.43765	-0.619183	0.0906445	-0.455203	0.10572
14428	b0290	predicted receptor (NCBI)	-0.0418842	-0.142894	0.0437525	-0.371296	-0.684227	-0.746575	0.163299	0.0428246	0.00381918	0.0296745	0.192537	-0.0332252	0.00218139	-0.126856	-0.164124	0.0813115	0.0105036	0.0250008	-0.0034666	0.157041	0.034652	-0.109948	0.127533	-0.141929	-0.18746	-0.20669	-0.319346	-0.575199	-0.0321862	-0.0297895	-0.0864098	-0.106761	-0.308303	-0.521344	-0.257823	0.0792498	0.739136	-0.246311	-0.259547	0.122481	0.0392615	-0.104651	0.0544146	-0.133741	-0.569629	1.45977	-0.843864
14429	b0291	predicted aromatic compound dioxygenase (NCBI)	0.0578596	-0.63348	-0.314871	-0.556039	-0.201074	-0.170712	-0.481318	-0.715062	-0.361374	-0.569513	-0.642078	-0.611318	-0.603005	-0.663063	-0.60955	-0.777464	-0.601053	-0.586935	-0.602145	-0.519386	-0.609419	-0.482989	-0.628329	-0.588148	-1.06022	-0.761899	-0.59473	-0.467565	-0.60346	-0.58873	-0.657544	-0.629808	-0.35959	-0.821609	-0.341838	0.242263	0.100456	-0.449992	-0.288661	-0.0518593	-0.5286	-0.553457	-0.0630461	-0.543063	-0.791296	-0.528899	0.171627
14430	b0292	hypothetical protein (NCBI)	0.0551836	-0.553214	-0.690837	-0.127264	-0.322429	-0.358477	-0.616951	-0.206587	-0.58116	-0.308311	-0.638456	-0.506723	-0.581598	-0.122324	-0.758757	0.296214	-0.584657	-0.570381	-0.590275	-0.556854	-0.646234	-0.697884	-0.688412	-0.656842	-0.930939	-0.604104	-0.532893	-1.00592	-0.443351	-0.442319	-0.502185	-0.558501	-0.531527	-0.40076	0.258311	0.652825	-0.761038	-0.869758	0.0382969	0.171195	-0.810942	-0.586643	-0.718352	-0.70574	-1.19392	-0.539	-0.808765
14431	b0293	hypothetical protein (NCBI)	0.0413644	-0.101328	-0.0277278	0.340251	0.701354	-0.0861764	-0.197987	-0.239996	-0.156839	-0.13781	-0.214724	-0.193764	0.00575939	-0.0416332	-0.267474	0.587339	-0.162436	-0.149627	-0.168047	-0.0791764	-0.0772328	0.157285	-0.0635634	0.828185	0.524982	0.0244378	0.325225	0.686048	-0.129231	-0.12694	-0.186945	-0.121296	0.0700105	0.1643	0.306208	0.0409633	1.34882	-0.543382	-0.25875	0.478976	0.157986	-0.0534927	-0.0232547	0.0562644	1.6874	-0.233	0.990443
14432	b0294	predicted regulator (NCBI)	-0.10985	2.93449	2.99329	3.10144	1.14859	2.05688	2.1144	2.01627	2.21116	2.2763	2.1532	2.23256	2.30108	2.16918	2.10576	2.10687	2.30055	2.30546	2.28354	2.33139	2.23477	2.16914	2.19543	2.21317	1.75318	2.48662	1.76497	2.07678	2.64875	2.67074	2.6007	2.55467	2.38069	2.06618	2.33604	1.31653	1.34489	1.66333	0.557592	-0.319693	2.20092	2.20099	2.22614	2.10654	1.80607	2.13183	-0.0500724
14433	b0295	hypothetical protein (NCBI)	0.157367	0.847593	0.947417	0.61493	1.42703	1.45985	0.629206	0.750084	0.697267	0.739954	0.639499	0.935335	0.751022	1.19443	1.26943	1.85546	0.749518	0.753913	0.733546	0.776718	0.869977	1.61592	1.53261	0.873747	1.80864	0.721662	1.74204	1.99127	0.88505	0.899663	0.830446	0.839368	1.07979	1.4479	1.39664	1.27259	0.728456	0.961573	0.457662	0.355077	0.77449	0.959992	0.828981	0.90516	0.595117	0.580864	-0.424983
14434	b0296	50S ribosomal protein L31 (NCBI)	0.382131	-0.123091	-0.856735	0.95552	1.15041	0.937743	-0.641942	-0.867286	0.379768	-0.61258	-0.668716	-0.705413	-0.636309	0.0904167	0.294024	1.54379	-0.642014	-0.639386	-0.654569	-0.628568	-0.292842	-0.801205	-0.229687	-0.292295	1.17273	-1.10187	0.547399	1.45477	-0.937643	-0.930603	-0.998975	-1.04591	-1.2313	-1.51143	0.412852	-0.179247	-0.013149	0.23764	-0.644808	0.458355	-1.35917	-1.35163	-1.25486	-1.45301	-0.466575	-0.753035	0.473398
14435	b0297	attaching and effacing protein, pathogenesis factor (RefSeq)	0.0257407	2.61402	2.73354	2.35724	1.49529	1.90362	2.69584	2.67176	2.82642	2.92384	2.77073	2.90613	2.97433	2.84329	2.87637	2.79869	2.97656	2.98271	2.95713	3.01692	2.93329	2.8702	2.87364	2.68312	2.45577	2.83969	2.54551	2.92729	3.00082	3.03259	2.96143	2.9075	2.72611	2.80386	2.07555	1.69755	1.43159	2.35384	0.391009	-0.0667749	2.57753	2.59796	2.57866	2.56206	1.94147	2.68976	0.723697
14438	b0300	putative ARAC-type regulatory protein (VIMSS)	0.277712	3.50357	3.06163	3.43247	2.24007	2.30836	3.1772	3.17875	3.32243	3.43667	3.27073	3.45435	3.48793	3.68766	3.31474	3.43729	3.49238	3.5086	3.48009	3.54613	3.70757	3.37088	3.38958	3.37877	3.56725	3.3385	2.50857	2.80737	3.4963	3.51496	3.45313	3.39815	3.43134	2.94932	2.50286	1.475	1.99742	2.12975	1.0064	0.293438	2.68029	2.69607	2.67873	2.58237	1.96452	3.19311	1.16959
14439	b0301	orf, hypothetical protein (VIMSS)	-0.012803	1.54188	1.56026	1.15376	1.11052	1.16169	1.71728	1.62801	1.80819	1.85916	1.74841	1.83048	1.86014	1.73649	1.96574	2.15546	1.86563	1.87418	1.86141	1.89681	1.80854	1.73786	1.90739	2.07737	1.51291	3.58744	1.43898	1.3711	1.82256	1.84694	1.77705	1.89516	1.89236	1.57224	1.46252	0.952602	0.721978	1.78888	0.522831	-0.0654039	1.57846	1.59011	1.61477	1.482	1.13547	1.6573	1.43858
14442	b0304	putative oxidoreductase (VIMSS)	0.079906	1.3804	1.41922	1.20336	1.20094	0.784699	1.26553	1.18157	1.34364	1.39935	1.33428	1.77699	1.88199	1.42127	1.54463	1.7369	1.39224	1.39412	1.37591	1.41677	1.39341	1.52816	1.53583	1.46902	1.39744	1.78397	1.4553	1.50319	1.4113	1.42034	1.36298	1.44716	1.3489	1.1836	1.07861	0.69896	0.806323	0.803421	0.0322989	-0.0151926	1.19306	1.28392	1.24309	1.13884	1.14605	1.25477	0.837649
14443	b0305	predicted DNA-binding transcriptional regulator (NCBI)	0.129361	2.51783	2.55593	2.16762	1.09516	1.8202	2.14026	2.2033	2.24527	2.32449	2.29645	2.30968	2.37512	2.212	2.3683	2.24706	2.36194	2.37944	2.33868	2.3962	2.36545	2.53666	2.37325	2.17435	2.10894	2.57501	1.96703	2.00944	2.62595	2.64271	2.60011	2.56054	2.36659	2.33157	1.83817	1.30371	1.22558	1.91156	0.355343	0.170968	2.23637	2.51909	2.18924	2.10712	1.73545	1.93288	0.606521
14444	b0306	predicted oxidoreductase (NCBI)	0.1302	0.546689	0.559813	-0.0188025	0.694131	0.497199	0.191897	0.333375	0.696638	0.290864	0.193562	0.249385	0.286826	0.229802	0.325653	0.61265	0.303829	0.310979	0.512593	0.328044	0.620063	0.676231	0.551393	0.660796	0.704147	0.361334	0.695814	0.677221	0.223782	0.228223	0.176101	0.250855	0.838877	0.070354	0.697182	-0.159835	-0.200363	-0.0234013	0.289118	0.0908222	0.0874924	0.740637	0.101252	-0.0137184	-0.212538	0.0412767	-0.192431
14445	b0307	predicted amino acid dehydrogenase with NAD(P)-binding domain and ferridoxin-like domain (NCBI)	0.0777217	0.756814	0.655585	0.47197	0.472366	0.586539	0.453527	0.334865	0.727654	0.53199	0.446241	0.481923	0.520576	0.606747	0.359729	0.932026	0.530566	0.533463	0.510842	0.55102	0.673454	0.74604	0.669279	0.549921	0.587771	1.01369	0.913028	0.734975	0.720218	0.727028	0.685539	0.743981	0.797695	0.366557	0.599551	0.181108	0.158551	0.343257	-0.189527	-0.0754424	0.190669	0.292418	0.51591	0.257878	0.164378	0.358543	0.422447
14446	b0308	putative transporter (VIMSS)	-0.0111159	-0.896256	-1.1449	-0.666743	-0.0548384	-0.406665	-1.08792	-1.09941	-1.06069	-1.05619	-0.290851	-1.123	-1.08415	-0.322758	-0.496318	0.0792697	-1.0759	-1.07377	-1.09412	-1.06129	-0.69684	0.250745	-0.493603	0.340502	-0.489359	-0.767244	0.586906	0.0715604	-1.1297	-1.12692	-1.05169	-0.770287	-1.30967	-0.46507	0.266016	-0.0603848	0.357166	-0.671428	0.175994	0.45246	-0.991448	-0.722424	-0.314214	-0.638303	-0.532258	-0.997375	-0.307456
14449	b0311	choline dehydrogenase (NCBI)	-0.0568661	-0.251528	-0.161034	-0.217703	0.374252	-0.0116144	-0.365278	-0.477616	-0.218735	-0.236779	0.141733	-0.370003	-0.112458	-0.0317464	-0.330831	0.0364972	-0.322117	-0.319612	-0.341075	-0.304633	-0.190586	-0.423922	-0.207679	-0.446981	-0.173152	1.03197	-0.0973104	1.09006	-0.335117	-0.33006	-0.275822	-0.320394	-0.265179	-0.2233	0.216006	0.169626	-0.475846	-0.263856	-0.217454	-0.0890124	-0.242184	-0.371251	-0.461337	-0.374678	-0.146133	1.04221	-0.012365
14450	b0312	betaine aldehyde dehydrogenase, NAD-dependent (NCBI)	-0.0520785	0.107085	0.140944	-0.355896	-0.490233	-0.760831	0.0540138	-0.0702921	0.105507	0.116881	0.310168	0.256896	0.0997159	-0.0292881	0.0255656	0.244473	0.10801	0.108667	0.0940449	0.124536	0.0452052	0.0209782	0.102758	0.0997027	0.0676218	0.21077	0.57611	-0.280483	0.0917607	0.188738	-0.0116581	0.19768	0.0234546	-0.3179	0.394345	-0.0652947	-0.203098	-0.201795	-0.23298	-0.044351	-0.00298162	0.0578678	-0.134493	0.205871	-0.542576	-0.0304129	0.571861
14451	b0313	probably transcriptional repressor of bet genes (VIMSS)	0.0597448	-0.0274421	-0.567213	-0.507778	-0.0456826	-0.052945	-0.351437	-0.550075	-0.30548	-0.308463	-0.368893	-0.365081	-0.335029	-0.170484	-0.24866	-0.107108	-0.332961	-0.325954	-0.33417	-0.313475	-0.399508	-0.32473	0.143081	-0.551147	0.301835	-0.45767	0.817809	-0.563401	-0.387012	-0.372238	-0.441056	-0.503575	-0.319304	-0.0874478	-0.13521	0.689709	-0.81029	-0.184642	0.295344	-0.0269589	-0.601073	-0.426191	-0.490551	1.55861	-0.0156766	-0.519058	1.24547
14452	b0314	choline transporter of high affinity (NCBI)	-0.204864	0.220285	0.333649	0.172847	-0.265619	-0.160284	0.366752	0.114331	0.323707	0.333471	0.260085	0.286645	0.394021	0.192108	0.163783	0.399568	0.319699	0.327159	0.317606	0.34263	0.38491	0.334868	0.572604	0.354932	0.273529	0.22862	0.36598	0.274981	0.32266	0.394767	0.285652	0.284186	0.301684	-0.126026	0.105548	0.496413	0.617898	0.725444	0.0993003	-0.242767	0.312226	0.342058	0.282387	0.428524	0.240682	0.0832529	-0.731742
14453	b0315	predicted DNA-binding transcriptional regulator (NCBI)	-0.028126	0.933864	1.02001	0.835391	0.826443	0.873734	0.968417	0.868048	1.04561	1.07123	1.0493	1.07252	1.09489	1.21506	1.30289	1.56976	1.08472	1.08609	1.06937	1.10665	1.19866	1.04033	1.21281	1.3585	1.27734	1.31914	1.34928	1.26802	1.22091	1.22753	1.17044	1.17427	1.11839	1.17742	1.11467	0.92958	0.401511	0.777147	0.228993	0.0453007	1.14668	1.15523	1.42944	1.14605	0.81597	1.05849	0.446613
14454	b0316	predicted DNA-bindng transcriptional regulator (NCBI)	0.128793	0.364476	0.43475	0.73217	0.265556	0.500302	0.328668	0.176445	0.393185	0.407853	0.529798	0.368245	0.489019	0.606498	0.634805	1.37091	0.412711	0.413726	0.398051	0.552915	0.841741	0.371506	0.538143	0.97157	0.813967	0.26461	1.34878	0.853898	0.407962	0.411803	0.355022	0.382008	0.422907	0.788213	0.895356	0.882828	-0.0101377	0.439083	-0.304129	0.259807	0.456079	0.559808	0.417164	0.539848	0.130784	0.370868	-0.0477504
14455	b0317	predicted inner membrane protein (NCBI)	0.0820676	0.61195	0.793724	0.69174	0.998767	0.827135	0.866723	1.09618	0.933717	0.948908	0.874247	0.916383	0.94516	1.22416	1.03502	1.85371	0.949982	0.95774	0.947301	0.983682	0.888061	0.857849	0.848999	0.943608	1.08993	0.993735	1.17211	0.941658	0.847554	0.866795	0.79748	0.735197	0.922437	1.01401	1.54387	0.814366	0.477419	0.122167	0.294654	-0.369177	0.610391	1.0071	0.684985	0.727525	0.204073	0.696937	-0.404706
14456	b0318	predicted transcriptional regulator with ankyrin domain (NCBI)	0.167289	2.81122	2.65939	2.32688	1.70126	2.03911	2.17633	2.11028	2.2871	2.34265	2.4819	2.34144	2.36985	2.40401	2.49262	2.23816	2.37802	2.38723	2.3725	2.42281	2.30806	2.39104	2.32706	2.13443	2.13614	2.48313	2.3152	2.05314	2.60024	2.62891	2.55854	2.53475	2.29515	2.22164	2.11662	2.01188	1.12345	1.93298	0.347568	-0.0197349	2.42667	2.3513	2.34531	2.44253	1.61415	2.23535	-0.165911
14457	b0319	hypothetical protein (NCBI)	0.0613057	1.36207	1.70202	1.32336	0.863767	1.3527	1.61279	1.50969	1.70445	1.74251	1.91351	1.72779	1.75629	1.62892	1.68133	2.09916	1.7631	1.77169	1.7588	1.80312	1.76982	1.6677	1.66054	1.75937	1.69725	1.56238	1.32966	1.12478	1.62137	1.63033	1.56958	1.51326	1.52772	1.32468	1.15506	0.569835	0.416991	1.09764	0.0697559	-0.00773281	1.37745	1.39595	1.41805	1.47146	1.06437	1.47741	0.364064
14458	b0320	predicted acyl-CoA synthetase with NAD(P)-binding domain and succinyl-CoA synthetase domain (NCBI)	-0.170648	-0.560022	-0.597448	-0.501109	-0.556855	-0.389153	-0.841979	-0.788216	-0.800472	-0.800799	-0.849921	-0.840301	-0.805908	-0.934257	-0.83225	-0.0793298	-0.808964	-0.796183	-0.814516	-0.780469	-0.870771	-0.714351	-0.817736	-0.751366	-0.834546	-0.685704	-0.193957	-0.384495	-0.944646	-0.93613	-1.00467	-0.898614	-0.443352	-0.634317	-0.425548	-1.23993	0.351376	-0.398967	-0.623186	-0.118838	-1.00349	-0.795202	-0.917506	-0.69749	-0.359286	-0.898574	-0.333584
14459	b0321	hypothetical protein (NCBI)	-0.0873154	-0.244711	-0.53896	-0.274228	-0.728265	-0.350086	-0.943087	-0.984125	-0.900642	-0.797403	-0.342701	1.7222	-0.895577	-0.565367	-0.760903	-0.330047	-0.921661	-0.743508	-0.910676	-0.894895	-0.861041	-0.676226	-0.608391	-0.415927	-0.617313	-0.571379	-0.361415	-0.601522	-1.02737	-1.01497	-1.0899	-0.927734	-1.14482	-0.962959	-0.371299	-0.761583	-0.251427	-0.68416	0.297884	-0.0923345	-0.88544	-0.673778	-0.288994	-0.676012	-0.203818	-0.97481	0.0995269
14461	b0323	predicted carbamate kinase-like protein (NCBI)	-0.171418	0.293378	0.231113	0.159784	-0.575256	-0.169836	0.710271	0.174169	0.408149	0.417254	0.360948	0.349569	0.414656	0.285564	0.221495	-0.0224532	0.414264	0.417531	0.400459	0.444849	0.338462	0.259513	0.410537	-0.0534277	-0.109629	0.253845	0.118155	0.852362	0.427781	0.441817	0.366707	0.322231	0.421391	-0.138699	0.512445	-0.298586	-0.0894383	0.709688	0.00313759	-0.725389	0.36886	0.183716	0.238898	0.341464	0.0711366	0.267747	-0.837101
14462	b0324	deaminase (NCBI)	-0.027668	-0.791928	-0.276829	-1.32542	-0.478294	-1.1405	-0.848759	-0.609857	-0.574484	-0.82474	-0.865051	-0.871413	-0.836932	-0.356122	-0.482016	-0.534765	-0.840839	-0.828405	-0.845718	-0.815006	-0.726401	-0.200789	-0.731694	-1.31201	-0.820757	-0.957462	-0.802103	-0.287286	-0.79334	-0.784714	-0.853263	-0.61413	-0.762108	-0.575129	-0.503326	-0.903851	-0.165788	-0.0303738	0.418562	0.0762491	0.535247	-0.696664	-0.79229	-0.417241	-0.56337	-1.17565	-0.245138
14463	b0325	predicted oxidoreductase, Zn-dependent and NAD(P)-binding (NCBI)	-0.26092	0.207131	-0.233759	-0.641461	-0.220808	-0.406596	-0.230577	-0.103537	-0.18794	-0.188174	0.204698	-0.0507702	-0.193792	-0.322073	0.197457	1.59382	-0.196995	-0.184254	-0.202472	-0.168831	-0.258959	0.0421595	-0.0940359	-0.261446	-0.137474	-0.273552	0.306719	-0.171933	-0.10972	-0.0986481	-0.0117952	-0.0728848	0.147652	-0.118535	-0.404841	0.819625	-0.846275	-0.402367	-1.52423	-0.209783	-0.338314	-0.141163	-0.110755	-0.190522	-0.335213	-0.298175	0.398298
14464	b0326	hypothetical protein (NCBI)	0.085697	3.0495	3.10962	2.66719	1.15867	2.76643	2.97196	2.93883	3.09992	3.18016	3.04937	3.20174	3.23541	3.10903	3.06139	3.99628	3.2386	3.25418	3.23837	3.28837	3.19399	3.11228	3.72284	2.77835	2.62204	2.73524	1.90359	1.76445	2.89742	2.91812	2.84823	2.79926	2.57963	2.82667	1.66607	2.08939	1.78268	2.76497	1.20934	0.467175	3.32327	3.33083	3.26868	3.19501	2.60001	3.15655	0.684836
14465	b0327	orf, hypothetical protein (VIMSS)	0.0605129	-0.331764	-0.224284	-1.07214	-0.428606	-0.815771	-0.637283	-0.5435	-0.605081	-0.611602	-0.654383	-0.656447	-0.621987	0.148931	-0.518037	0.776786	-0.625706	-0.613188	-0.619945	-0.59924	-0.689008	-0.444163	0.08914	-0.0498435	-0.454395	-0.76051	-0.160987	-0.0786422	-0.703069	-0.694556	-0.763092	-0.812924	-0.501198	-1.06418	0.216064	-0.758171	-0.0210923	-0.38877	0.116389	-0.0113211	1.47908	-0.225016	-0.678928	-0.538042	-0.517875	-0.406547	0.199077
14466	b0328	neutral amino-acid efflux system (NCBI)	0.0253321	0.172045	-0.0383569	0.293812	0.106663	-0.0933159	0.21515	0.216863	0.262645	0.270147	0.611091	0.236166	0.406416	0.195986	0.319245	1.04196	0.267942	0.280965	0.272716	0.298259	0.264181	0.254742	0.459402	0.414587	0.28377	0.38192	0.141934	0.498779	0.257661	0.268922	0.20008	0.150401	0.43986	0.125812	-0.238474	0.391907	-0.464049	0.421542	-0.16064	-0.259785	-0.0244721	1.46192	0.106114	0.131639	0.341488	0.0955358	0.73698
14467	b0329	hypothetical protein (NCBI)	-0.0145401	0.609934	0.884148	0.403982	0.059226	-0.26416	0.562361	0.423935	0.845802	0.674772	1.01998	0.706324	0.686114	0.816926	0.513019	0.923785	0.692926	0.701464	0.690426	0.732686	0.635398	0.73164	0.872358	0.360846	0.0723259	0.757646	0.185943	0.193729	0.600609	0.606227	0.54585	0.489271	0.374783	0.246106	-0.286206	-0.541472	-0.338854	0.0177276	0.126106	-0.0178602	0.592706	0.510187	0.265084	0.355027	0.0792136	0.588681	-0.148172
14468	b0330	DNA-binding transcriptional activator (NCBI)	-0.085057	0.272165	0.183686	-0.0694369	-0.647422	-0.196478	0.128325	-0.0654132	0.181465	0.185582	0.306232	0.144929	0.1738	0.0503964	0.10927	-0.189577	0.177831	0.185225	0.177553	0.20877	0.113632	0.0527424	0.1898	-0.297019	0.202077	-0.00844558	-0.0976619	-0.0805795	0.0953522	0.0969269	0.0370015	0.265268	-0.0703721	0.00886624	-0.420393	0.114427	-0.460229	0.00846754	0.400516	0.257468	-0.0394888	0.162068	0.0166807	0.515205	-0.175489	-0.0387578	-1.85051
14469	b0331	2-methylisocitrate lyase (NCBI)	-0.163582	-0.188171	-0.149364	-0.223466	-0.229252	-0.40013	-0.0201905	0.423867	0.0231917	0.0268462	-0.0262955	-0.0102272	0.0241407	-0.104093	-0.149809	-0.179784	0.0212704	0.0341464	0.0263313	0.0504586	-0.0399166	-0.113809	-0.0723254	-0.154805	-0.594881	-0.13461	-0.467517	-0.810097	0.026042	0.0278298	-0.0321195	-0.0883933	0.738063	-0.540998	-0.0306104	0.229425	0.257032	-0.380254	0.448517	0.194643	0.30498	-0.0513754	-0.00753945	0.0263687	0.759319	0.79055	1.01169
14471	b0333	2-methylcitrate synthase (NCBI)	-0.0132723	-0.299997	-0.260661	-0.500311	-1.19412	-0.700958	-0.318437	-0.528648	-0.28217	0.141073	-0.331522	-0.321614	-0.292741	-0.421062	-0.371356	-0.37004	-0.296177	-0.283533	-0.290662	-0.268754	0.247072	-0.268556	-0.389267	-0.484861	-0.139024	-0.193087	-0.853664	-0.26484	-0.289106	-0.288419	-0.348246	-0.0274149	-0.595752	-0.663853	-0.795328	-0.27431	-0.394078	-0.386622	0.0791705	-0.077711	-0.367855	-0.338125	-0.286145	0.314632	-0.134565	-0.0599771	-0.603062
14472	b0334	2-methylcitrate dehydratase (NCBI)	0.0078633	0.144711	0.00895922	-0.133416	-0.335411	-0.245419	0.122201	0.132597	0.178178	0.174399	0.117756	0.144882	0.173671	0.210171	-0.000112841	-0.286215	0.169447	0.183955	0.175858	0.200907	0.110437	0.196146	0.157847	-0.0540168	-0.428901	-0.0142112	-0.52449	-0.0868466	0.180207	0.14834	0.088058	0.0318839	0.105323	0.141269	-0.211991	-0.390447	-1.07475	0.254434	0.225453	-0.231987	0.369767	0.0719489	0.107226	0.0781991	0.35667	-0.114024	0.504759
14473	b0335	predicted propionyl-CoA synthetase with ATPase domain (NCBI)	-0.242419	-0.418306	-0.206814	-0.718241	-0.971202	-0.923435	-0.590757	-0.543782	-0.547054	-0.563474	-0.293881	-0.600121	-0.571229	-0.699625	-0.666028	-0.77088	-0.576347	-0.562238	-0.569154	-0.547934	-0.637811	-0.71197	-0.667821	-0.496819	-0.531735	-0.592442	-0.934199	-0.753492	-0.434228	-0.433725	-0.382778	-0.335198	-0.456527	-0.535122	-0.761305	0.423745	-0.130457	-0.417535	0.383792	0.478077	-0.494577	-0.19144	-0.408157	-0.322082	0.00660072	-0.605149	-0.358462
14474	b0336	cytosine transporter (NCBI)	0.107202	-0.00702089	-0.138598	0.222448	-0.207423	-0.379127	-0.217752	-0.181835	-0.167776	-0.185446	0.0357863	-0.222615	-0.193669	-0.207269	-0.157247	-0.0788073	-0.197261	-0.183189	-0.191685	-0.161589	0.241907	0.149666	-0.287742	0.667776	0.243225	-0.171757	-0.625085	-0.755413	-0.0515804	-0.0353112	-0.104296	-0.163031	-0.302078	-0.442696	-0.0931227	0.580644	-0.0957559	1.48819	0.204095	0.184435	-0.0596398	0.141689	0.010271	0.0293604	0.597231	-0.211985	-0.752573
14475	b0337	cytosine deaminase (NCBI)	-0.0908135	-0.838293	-0.368593	-0.887143	-0.138947	-0.526843	-0.57211	-0.708032	-0.845588	-0.870909	-0.66455	-0.913774	-0.487021	-1.01331	-1.05921	-0.519829	-0.888935	-0.875122	-0.882852	-0.855225	-0.949544	-0.548954	-0.576623	-0.805562	-0.705914	-1.04908	-0.776838	-1.1817	-0.890608	-0.876419	-0.945172	-1.00402	-0.715368	-0.749796	-0.952485	-0.0909279	-1.10337	-0.59312	0.346801	0.261676	-0.943497	-0.785107	-0.805583	-0.733524	0.0743384	-0.401597	-0.219195
14476	b0338	DNA-binding transcriptional dual regulator (NCBI)	0.174022	-0.695532	-0.66703	-0.916185	-0.126257	-0.745656	-0.690382	-0.907293	-0.647071	-0.663777	-0.706288	-0.706109	-0.671661	-0.212089	-0.848874	-0.313507	-0.676814	-0.662709	-0.680416	-0.648423	-0.734585	-0.812403	-0.765714	-1.12571	-1.14159	-0.750594	-1.25028	-1.70832	-0.592242	-0.578574	-0.646285	-0.705056	-0.336707	-0.256925	-1.20387	0.59345	0.929727	-1.4682	-0.00166268	-0.149911	-0.927708	0.897727	1.30062	2.44959	0.895481	-0.57842	-2.30729
14477	b0339	carbonic anhydrase (NCBI)	-0.010834	0.911438	0.657973	0.237919	-0.469435	0.398087	0.617427	0.443376	0.675079	0.684683	0.624522	0.622667	0.675937	0.558752	0.494762	0.240789	0.686745	0.691176	0.673555	0.719721	0.630015	0.546105	0.595394	0.23585	0.105816	0.348937	-0.380139	0.261394	0.509247	0.513028	0.452857	0.396738	0.205098	-0.0114272	0.14854	0.174617	0.529583	0.33047	-0.623473	0.054547	0.552015	0.596149	0.624874	0.409192	0.468865	0.433355	-1.89565
14478	b0340	cyanate hydratase (NCBI)	-0.175764	-0.243672	-0.178205	-0.59001	-1.36701	-1.13513	-0.161278	-0.365012	-0.116862	-0.14022	1.22018	-0.213787	-0.150392	-0.263932	-0.328894	-0.615543	-0.14711	-0.142369	-0.148881	-0.121373	-0.197797	-0.294133	-0.227209	-0.590311	-0.736238	-0.463692	-1.26583	0.181581	-0.27422	-0.274695	-0.334392	-0.390725	0.0242395	-0.196174	-0.32584	-1.53546	-1.46395	-0.258566	0.778808	0.244041	-0.419907	0.162068	-0.320202	-0.54618	-0.0183399	-0.227414	-1.88617
14479	b0341	predicted cyanate transporter (NCBI)	-0.0955831	0.0330505	0.111663	-0.0506038	-0.102049	0.117603	0.0340751	0.590203	0.0951111	0.0758294	0.0427409	0.0353735	0.0985735	-0.0146806	0.0992873	-0.0343636	0.103705	0.109211	0.100448	0.135328	0.0574886	0.401303	0.0219527	0.469716	0.0950398	0.161125	1.36753	-0.0880479	0.151005	0.153724	0.0837375	0.362621	0.627042	0.331682	0.33088	-0.122316	0.155884	-0.0124093	-0.329619	-0.0133842	0.39239	0.200612	0.193663	-0.132898	-0.335108	0.317331	-0.537722
14480	b0342	galactoside O-acetyltransferase (NCBI)	0.0636924	1.93776	1.99318	1.75533	0.823611	1.11216	1.73002	1.62354	1.81242	1.96145	2.07482	1.816	1.86651	1.84622	1.82419	1.5931	1.88295	1.97731	1.88581	1.92316	1.83548	1.83909	1.80491	1.45191	1.4983	1.93839	1.39718	1.31744	2.12118	2.13975	2.06152	2.02386	1.83475	1.74701	1.26193	1.29002	1.45161	1.39792	0.460893	0.290743	2.09677	1.99491	1.903	1.75934	1.37866	2.02443	0.708311
14481	b0343	galactoside permease (NCBI)	-0.0372633	1.10179	1.16315	0.954499	0.496606	0.619298	1.2391	1.08517	1.31477	1.30318	1.26004	1.25462	1.31171	1.29259	1.14849	1.18203	1.33009	1.34448	1.32218	1.36578	1.35608	1.2147	1.26646	1.17171	0.998697	1.11525	0.849932	0.511768	1.26188	1.27676	1.19894	1.16404	0.993406	0.83422	0.705864	0.963002	0.199241	1.00303	0.167723	0.0558556	1.12354	1.16808	1.11407	1.22617	0.815156	1.07895	0.951178
14482	b0344	beta-D-galactosidase (NCBI)	0.0501294	-1.23227	-0.762841	-1.10691	-0.308198	-0.632119	-1.1619	-1.36892	-1.12533	-0.83132	-1.17895	2.32053	-1.18546	-1.27058	-1.3532	-0.735309	-1.15728	-1.14435	-0.939798	-1.13268	-1.22911	-1.04523	-0.800416	-0.925343	-1.46385	-1.30652	-1.43854	-1.15572	-1.122	-1.11466	-1.19163	-1.23295	-0.67756	-0.537442	-0.760125	-0.395854	0.42704	-0.261272	-1.00541	-0.266019	-0.715572	-1.14044	-0.761115	-1.16779	-0.908242	-1.27458	0.252028
14483	b0345	transcriptional repressor of the lac operon (VIMSS)	0.119746	-0.536225	-0.670732	-0.486878	0.0277611	-0.35279	-0.503549	-0.339802	-0.458256	-0.487183	-0.0695728	-0.54898	-0.504689	-0.589631	-0.672139	-0.424089	-0.475887	-0.462683	-0.488299	-0.44921	-0.0253201	-0.633898	-0.550784	-0.764426	-0.68183	-0.481701	-0.65913	-0.866033	-0.297431	-0.288372	-0.365539	-0.350767	-0.645177	-0.693638	-0.545768	0.500054	-0.268616	-0.282923	-0.475162	-0.223485	-0.231163	-0.594411	-0.513824	0.59044	-0.425161	-0.630729	-0.250402
14484	b0346	DNA-binding transcriptional activator, 3HPP-binding (RefSeq)	-0.0904687	0.168163	0.251285	0.342206	-0.691711	-0.716403	0.235877	0.66608	0.303336	0.902519	0.249216	0.781486	0.294322	0.209725	0.657299	-0.13809	0.324988	0.338973	0.311053	0.357629	0.259412	0.172239	0.248479	-0.106842	-0.27809	0.331137	-0.0229642	0.0715604	0.515042	0.527179	0.44967	0.408613	0.169617	0.295927	1.26282	0.648424	1.64228	1.80945	0.116244	1.02898	0.461437	0.254924	0.311319	0.106748	-0.455594	0.348027	-0.450839
14485	b0347	3-(3-hydroxyphenyl)propionate hydroxylase (NCBI)	-0.00206933	-0.798817	-0.642743	-0.848214	-0.432792	0.252731	-0.533974	-0.702703	-0.284703	-0.261656	-0.336043	-0.560078	-0.526452	-0.597381	-0.518875	-0.725402	-0.484417	-0.489207	-0.514261	-0.494681	0.00029115	-0.370638	-0.580591	-0.201453	-0.525327	-0.767519	-1.2548	-1.3399	-0.581664	-0.569863	-0.657116	-0.553494	-0.768745	-0.881885	-0.846057	-0.226796	-0.0865174	-0.551072	-0.673253	0.0793568	-0.70654	-0.322546	-0.418619	-0.835405	-0.122976	-0.570753	0.112593
14486	b0348	2,3-dihydroxyphenylpropionate 1,2-dioxygenase (NCBI)	0.0709148	0.78426	0.766269	0.49003	0.138534	0.532904	0.182632	0.68496	0.261857	0.251534	0.211582	0.215552	0.25709	0.611381	0.0928367	0.686334	0.289476	0.285448	0.258149	0.285055	0.457258	0.188797	0.483137	0.494034	0.45822	0.212099	0.161343	0.157368	0.323193	0.340053	0.700213	0.429172	0.710715	-0.0376927	0.122652	0.796213	-0.0151194	-0.0965982	-0.586967	0.1998	0.370211	0.122887	0.129595	0.428659	-0.0513513	0.368892	-0.660042
14487	b0349	2-hydroxy-6-ketonona-2,4-dienedioic acid hydrolase (VIMSS)	-0.0558627	-0.384104	-0.490356	-0.096323	-1.73882	-0.128981	-0.348589	0.0423789	-0.303064	-0.328244	-0.344471	-0.384031	-0.350374	-0.259367	-0.232912	-0.334003	-0.327533	-0.331927	-0.338263	-0.336116	-0.137461	-0.329788	-0.415958	-0.639462	0.314315	-0.561392	-0.98957	-0.702686	-0.368639	-0.356772	-0.279451	-0.478611	-0.569167	-0.742846	-0.499342	-0.787778	-0.739947	-0.028	0.0113196	0.0242561	-0.579942	-0.324896	-0.494689	-0.320527	1.07723	-0.101606	-0.0985434
14488	b0350	2-keto-4-pentenoate hydratase (VIMSS)	-0.0279874	-0.159661	-0.0376004	0.111583	-1.01454	-0.857206	-0.0468864	-0.000973745	-0.00239097	-0.00858974	-0.0291951	-0.0412283	-0.00857537	-0.0410784	-0.173219	-0.303999	-0.00190878	-0.00376667	0.00463339	0.00903799	-0.0467221	-0.12524	-0.0768154	0.114507	-0.588419	-0.278388	1.08824	-1.10475	-0.0937364	-0.086619	-0.00859105	-0.20066	-0.377634	-0.59036	-0.762104	-0.194244	0.575457	0.334595	-0.585217	0.101529	-0.230322	-0.335672	-0.344546	-0.583573	-0.601524	-0.172785	0.58212
14489	b0351	acetaldehyde dehydrogenase (NCBI)	-0.141997	0.113665	0.159657	0.95526	0.0622363	-0.226399	-0.0715447	0.0192195	-0.0234136	-0.0258259	0.189965	0.283206	-0.0226597	-0.0069022	0.0352091	-0.0667949	-0.0155876	-0.0172898	-0.0093474	0.182129	0.251159	-0.00147497	-0.0909049	0.055734	-0.0934041	-0.0372329	-0.833666	0.292094	0.147225	0.156708	0.0667004	0.100774	-0.034102	0.104419	-0.255171	0.221249	-0.27722	-0.347365	-0.397829	-0.132172	-0.102105	-0.141282	-0.0983232	-0.0531483	-0.138674	0.447099	0.372929
14490	b0352	4-hydroxy-2-ketovalerate aldolase (NCBI)	-0.0757524	0.280067	0.347887	-0.0324542	-0.42285	0.357658	0.60423	0.474352	0.660168	0.66196	0.629027	0.64507	0.676647	0.600546	0.601489	0.590312	0.673537	0.686018	0.67874	0.702584	0.649103	0.80504	0.834756	0.552288	0.606428	0.437696	-0.086025	-0.645614	0.445139	0.491584	0.406465	0.594346	0.128103	0.697224	0.579914	0.295579	0.552081	0.627309	-0.603693	-0.535013	2.57713	2.81638	2.44455	2.66094	2.33301	0.58929	-0.703739
14491	b0353	putative transport protein (VIMSS)	0.1583	1.50212	1.4404	1.05382	0.0237113	0.561381	1.53152	1.44871	1.61319	1.63096	1.58069	1.62239	1.64236	1.58166	1.499	1.21259	1.65416	1.66036	1.64724	1.67907	1.63785	1.54649	1.57589	1.25887	1.09139	0.954821	0.570117	0.61919	0.954059	0.957516	0.909542	0.952829	0.959797	1.41306	0.706514	0.286791	0.598714	1.06219	-0.296234	-0.592436	1.43575	1.12567	1.14264	0.940544	1.02232	1.40979	-0.590086
14492	b0354	nucleoprotein/polynucleotide-associated enzyme (VIMSS)	0.0469415	0.307052	0.512529	0.354174	-0.171348	-0.102578	0.290965	0.431972	0.335294	0.323774	0.304342	0.293799	0.325551	0.649955	0.322088	0.067215	0.320805	0.332578	0.327366	0.344221	0.392517	0.212988	0.241431	0.241826	-0.0151844	0.598054	0.981726	0.290496	0.642351	0.645731	0.597764	0.583196	0.475427	0.292911	0.160268	0.399066	-0.578327	0.973446	0.313487	0.357243	0.401565	0.399782	0.515999	0.620537	0.403968	0.595791	-0.55358
14493	b0355	predicted esterase (NCBI)	0.00902433	0.480829	0.557355	0.692112	0.46043	-0.0497312	0.282045	0.136123	0.326546	0.319788	0.299763	0.286352	0.435224	0.491319	0.453963	0.0543226	0.325557	0.323653	0.332188	0.336133	0.280274	0.239529	0.250788	0.589388	0.141421	0.247997	0.212922	-0.108666	0.336805	0.382892	0.297813	0.304429	0.355391	0.451751	1.33925	0.766932	-0.181701	0.741203	0.482812	0.210476	0.351792	0.420643	0.415682	1.16754	0.73492	0.702927	-0.226273
14494	b0356	alcohol dehydrogenase class III/glutathione-dependent formaldehyde dehydrogenase (NCBI)	-0.0145601	-0.132475	0.0415287	-0.563764	0.781589	0.0659426	-0.0890266	-0.382933	-0.18677	-0.199104	-0.213475	-0.236628	0.377448	0.30107	0.132092	0.298707	-0.197785	-0.199873	-0.190793	-0.1886	-0.0210891	-0.191141	-0.251058	-0.334714	-0.315655	-0.181958	0.0193463	0.501655	-0.185854	-0.140023	-0.225075	-0.0565032	-0.255542	-0.0277244	-0.101373	-0.0612277	0.097013	0.490044	0.336341	0.199795	-0.335034	-0.341309	-0.310108	-0.555941	0.482708	-0.119376	-0.657391
14495	b0357	putative alpha helix chain (VIMSS)	0.147838	1.29944	1.36961	0.984593	-0.457412	0.435268	0.963231	0.828859	1.03063	1.0241	0.981249	0.982186	1.01481	0.941878	0.850441	1.23649	1.02178	1.03617	1.04619	1.03612	0.977325	0.898384	2.18676	1.37868	0.441668	1.35536	0.588886	0.41971	1.53942	1.55051	1.46033	1.44288	1.18031	1.005	0.335317	1.83306	0.0416961	0.774844	0.0133555	-1.21558	1.30919	1.33979	1.33261	1.13698	1.39325	0.953077	-0.309812
14496	b0358	hypothetical protein (NCBI)	0.0652391	1.05024	1.05225	0.801304	0.780417	0.686983	1.24173	1.00336	1.17842	1.19788	1.13956	1.18144	1.21106	1.23763	1.0385	1.09345	1.2268	1.2259	1.23148	1.24506	1.17866	1.15767	1.3141	1.00262	1.04408	1.04578	0.938385	0.714184	1.07385	1.12289	1.03748	1.01467	1.047	0.774426	0.481869	0.558633	0.344974	0.76979	-0.0200997	0.225867	1.06718	1.06973	1.15344	0.828812	0.98526	1.04413	0.247408
14501	b0363	predicted glucosyltransferase (NCBI)	-0.0161347	0.172237	0.292817	0.230938	0.206244	0.173881	0.155893	0.026801	0.280024	0.210247	0.179382	0.221415	0.275283	0.176262	0.336214	0.16858	0.221585	0.686086	0.227297	0.290248	0.301999	0.331979	0.183939	0.0399515	0.109234	0.220886	0.432613	0.388372	0.302629	0.30651	0.258484	0.268588	0.147071	0.00698409	-0.210895	0.0726477	0.0303112	0.233149	-0.0633736	-0.054737	1.00654	0.368086	0.265682	0.219565	-0.0536768	0.338441	-0.11167
14502	b0364	orf, hypothetical protein (VIMSS)	-0.0479145	3.43714	3.4966	3.42285	2.17212	2.54268	3.69773	3.78986	3.8752	3.98079	3.83472	4.02455	4.03743	3.98754	3.90621	3.58781	4.08091	4.08302	4.0797	4.1221	4.05152	3.96612	4.00032	3.78999	3.52173	3.8021	3.14199	2.84396	3.9619	4.0303	3.94274	3.91926	3.66254	3.6013	3.15609	2.98569	2.06634	3.25661	0.963376	-0.92957	3.80044	6.23991	3.68416	3.62824	3.07888	3.33943	2.55274
14503	b0365	taurine transport system periplasmic protein (VIMSS)	0.0594679	-0.352178	-0.122574	-0.156659	-0.514559	-0.1781	-0.462852	-0.640299	-0.424126	0.409224	-0.463102	0.073593	-0.484475	0.068912	-0.353311	-0.276533	-0.450761	-0.453156	-0.443171	-0.443914	-0.23612	-0.28686	-0.524592	-0.344663	-0.232987	-0.551728	0.0651664	-0.436553	-0.388035	-0.343986	-0.428839	-0.109472	-0.707795	-0.377296	0.284365	-0.6423	-1.20902	-0.151876	-0.807076	-0.0245926	-0.111494	-0.0883312	-0.0360499	-0.281368	1.01892	-0.359311	0.153058
14504	b0366	taurine transporter subunit (NCBI)	0.101564	-0.0272583	-0.169912	0.0891894	-0.327159	-0.724849	-0.120898	-0.308627	-0.31477	-0.338048	-0.369634	-0.39643	-0.209653	-0.432911	-0.524585	-0.537678	-0.353841	-0.340006	-0.328327	-0.34373	-0.410626	-0.491011	0.0256932	0.134024	-0.498038	-0.141743	0.228977	-0.00528559	-0.215232	-0.209903	-0.299447	-0.262112	-0.170017	0.171161	0.0254184	-0.869647	-0.224885	-0.736955	-0.201536	-0.141085	-0.333779	-0.261666	-0.490466	-0.594605	1.00781	-0.509626	0.0759574
14505	b0367	taurine transporter subunit (NCBI)	0.10019	0.55313	0.622422	1.05845	-0.523877	-0.0885607	0.520178	0.385969	0.581296	0.580925	0.542011	0.542896	0.556741	0.512113	0.85683	0.537618	0.592103	0.59043	0.598283	0.60444	0.538869	0.449717	0.516978	0.173313	0.967138	0.391801	-0.349143	-0.0866742	0.555023	0.602741	0.51748	0.492467	0.62766	0.0624318	0.169726	0.801652	0.967142	0.836669	0.0454619	0.23324	0.602756	0.624311	0.661262	0.6266	0.747311	0.226015	1.12991
14506	b0368	taurine dioxygenase (NCBI)	-0.0604275	1.07962	1.15001	1.17456	0.691105	0.526372	1.21429	1.11281	1.29308	1.29603	1.25324	1.27348	1.37074	1.24077	1.1579	1.24473	1.31358	1.32601	1.31884	1.34203	1.2711	1.42763	1.47991	0.910136	1.03077	0.793286	0.9897	0.540496	0.975901	0.980451	0.932354	0.907001	0.655547	0.566346	0.823183	-0.408101	-0.434171	0.188166	-0.955946	0.158361	0.905114	0.738873	0.768981	0.772132	0.468643	0.917811	2.20829
14513	b0375	predicted DNA-binding transcriptional regulator (RefSeq)	0.0369631	2.86064	2.92713	2.60138	1.51916	2.17005	3.04348	3.2028	3.199	3.27324	3.15695	3.3136	3.33287	3.27321	3.19092	3.00087	3.34951	3.36705	3.32243	3.37565	3.3272	3.24055	3.27953	2.94513	2.78073	2.78669	2.10564	1.84159	2.87749	2.90754	2.83624	2.83402	2.60376	2.44434	1.82054	1.65836	1.85561	2.2957	1.42127	-0.0700179	2.84349	2.84654	2.81278	2.68211	2.3343	2.89008	0.992663
14514	b0376	beta-lactamase/D-alanine carboxypeptidase (NCBI)	-0.048828	0.525978	0.341582	0.302635	0.0643902	0.010031	0.24845	0.210995	0.182954	0.341541	1.20375	0.170479	0.197396	0.302084	0.137759	0.645185	0.187269	0.201509	0.182624	0.215542	0.2125	0.171599	0.259355	0.248763	0.131826	0.349356	0.209144	0.345389	0.463302	0.473565	0.415378	0.515433	0.305503	0.493642	0.0817682	0.335271	0.605133	0.219017	0.146742	0.314993	0.532227	0.993391	0.450231	0.467395	0.253871	1.39964	0.0036319
14515	b0377	predicted transporter (NCBI)	-0.00546186	-0.4472	-0.440828	-0.249787	0.256689	-0.202157	-0.438502	-0.490555	-0.0797664	-0.419708	-0.436321	-0.374229	-0.427578	-0.483566	-0.256567	-0.190285	-0.439396	-0.425861	-0.442665	-0.416496	-0.0917208	-0.158605	-0.40272	-0.148791	-0.639949	-0.141241	-0.0888247	-0.118049	-0.588127	-0.582929	-0.45195	-0.425457	-0.367901	-0.279816	-0.160557	-0.124839	-0.767824	-0.353948	-0.143012	-0.248767	1.09626	1.29393	-0.586722	-0.485418	0.799804	-0.242991	0.0493069
14516	b0378	predicted DNA-binding transcriptional regulator (NCBI)	0.165253	-0.531613	-0.446161	-0.447704	0.313519	0.0909238	-0.396915	-0.546811	-0.348376	-0.372403	-0.389147	-0.40853	-0.256713	-0.450542	-0.341181	-0.412086	1.94657	-0.36564	-0.399729	-0.380681	-0.430633	-0.196679	-0.219036	0.137805	-0.0772015	-0.489987	0.0589338	1.57266	-0.386226	-0.381149	-0.438756	-0.26844	-0.0388095	0.15809	-0.0574338	0.0404193	-0.760679	-0.0594463	0.396909	0.426716	-0.462926	-0.231819	1.55711	-0.390841	-0.435093	-0.183159	-0.419813
14517	b0379	predicted inner membrane protein (NCBI)	-0.0858077	-0.632283	-0.395761	-0.548844	0.460955	0.298406	-1.00902	-0.348288	-0.98422	-1.00152	-1.01258	-1.041	-1.01384	-1.11002	-1.18646	-0.0101709	-1.02614	-1.01282	-0.656446	-0.492304	-1.05478	-1.13846	-1.07326	0.403761	0.018484	-0.97022	0.165191	0.957095	-0.838205	-0.829829	-0.892873	-0.909743	-0.789468	-0.74174	0.409079	1.5045	0.6919	0.917431	-1.25004	0.154212	3.39336	0.0676235	2.73871	-1.0331	2.32861	-0.936266	-0.675786
14518	b0380	orf, hypothetical protein (VIMSS)	-0.0521868	-0.5245	-0.099543	-0.330875	0.778141	0.0274981	-0.468936	-0.570981	-0.416464	-0.405516	-0.445338	-0.307823	-0.0115477	-0.482986	-0.155479	-0.334532	-0.403564	-0.389065	-0.408703	-0.373211	-0.425221	0.27505	-0.453155	-0.441141	-0.248674	-0.45964	0.919264	0.193437	-0.47165	-0.461402	-0.519592	-0.538947	-0.76014	-0.477091	0.105745	-0.0881625	-1.74874	0.499629	-0.303519	-0.236889	-0.525047	-0.523454	-0.503439	4.10203	-0.200502	-0.355348	-1.31351
14519	b0381	D-alanylalanine synthetase (NCBI)	-0.0622958	0.253613	0.23989	0.338837	0.215995	0.127902	0.679703	0.732739	0.294265	0.292497	0.265727	0.264618	0.291636	0.570886	0.806577	0.33806	0.280481	0.294324	0.276602	0.305699	0.255132	0.172343	0.232579	0.0514975	0.369181	0.0596245	0.340902	0.63451	0.20254	0.210008	0.152135	0.262019	-0.0875138	0.057514	0.13038	0.279178	-0.432379	0.169956	0.0452851	0.0847908	0.280523	0.452064	0.32934	0.628443	0.453155	0.260015	0.61537
14520	b0382	hypothetical protein (NCBI)	0.138979	0.434096	0.735414	0.715811	0.929444	0.52843	0.511886	0.413785	0.709547	0.729254	0.532775	0.569543	0.76972	0.491108	0.502075	0.524287	0.573292	0.58813	0.686717	0.601204	0.588316	0.630855	0.69661	0.423925	0.247738	0.344408	1.00541	0.412528	0.267833	0.281973	0.414744	0.208665	0.335377	0.561682	0.507738	0.0172136	0.56052	0.320689	0.0654125	0.198142	1.04675	0.884745	0.815354	0.759072	0.460805	0.70761	0.229692
14521	b0383	alkaline phosphatase (VIMSS)	0.0817117	-0.531503	-0.533625	-0.339709	0.229736	-0.244638	-0.470896	-0.272595	-0.383083	-0.443248	-0.370601	-0.477959	-0.188335	-0.302696	-0.325501	-0.282377	-0.462713	-0.448628	-0.462261	-0.44053	-0.424666	-0.298102	-0.364233	-0.519885	-0.270711	-0.242392	0.255418	0.644862	-0.525365	-0.521753	0.0370846	-0.593274	-0.430842	-0.362097	-0.40003	-0.132203	0.104695	-0.202514	-0.197389	0.130015	-0.458624	-0.447082	0.725281	-0.697119	-0.36839	0.445228	-0.293164
14522	b0384	induced by phosphate starvation (VIMSS)	-0.120246	-0.880846	-0.810067	-0.236649	-0.830563	-1.11515	-0.760432	-0.913923	-0.732354	-0.750021	-0.77472	-0.791437	-0.783717	-0.856233	-0.932699	-0.0128785	-0.776851	-0.763082	-0.775781	-0.757091	-0.814395	-0.340234	-0.823208	-0.604886	-0.787416	-0.750085	-1.03145	-0.473874	-0.619982	-0.619687	-0.675711	-0.690914	-0.900807	-0.598867	-0.258906	-0.698559	-0.900145	1.00581	0.14563	-0.611621	-0.710561	-0.738122	-0.63723	-0.852615	-0.198124	-0.880303	-2.61555
14523	b0385	predicted diguanylate cyclase (NCBI)	0.123271	0.314527	0.139779	-0.256864	-1.2851	0.29822	0.148623	0.0408909	0.197423	0.197347	0.14536	0.172668	0.184742	0.275414	0.0140378	0.226484	0.189959	0.204592	0.193138	0.221227	0.409607	0.0908972	0.146173	0.47397	-0.263313	-0.073889	-0.0288924	-0.0462581	0.0596571	0.0624987	-0.00910861	0.214882	0.442619	0.151827	-0.250148	0.0966516	0.743543	0.367316	0.237751	-0.188262	0.0938349	-0.119131	-0.0274471	-0.233683	-0.799627	-0.0955937	0.0222479
14524	b0386	pyrroline-5-carboxylate reductase (NCBI)	-0.0573198	2.67371	2.8241	2.42629	1.03894	1.91717	1.93542	2.01104	2.01914	2.04605	1.96463	2.03347	2.05042	1.96648	1.95877	1.68822	2.05998	2.07785	2.05177	2.10065	2.02644	1.96436	2.01197	1.66019	1.5001	3.35909	2.80316	2.36479	3.48959	3.50893	3.43549	3.43114	3.22473	3.03502	2.63809	1.48189	1.18065	2.23605	0.481381	-0.488211	2.53757	2.5234	2.54957	2.41527	2.15579	2.39357	-0.134757
14525	b0387	orf, hypothetical protein (VIMSS)	-0.11421	-1.07373	-0.427726	-0.856576	-0.746956	-1.30303	-0.930671	-1.10905	-0.237745	-0.932328	-0.960279	-0.984565	-0.967153	-1.0524	-1.14674	-0.8986	-0.961607	-0.945544	-0.966274	-0.934673	-0.173323	-1.07009	-1.00669	-0.283503	-1.06733	-0.708406	-1.63656	-1.19058	-1.04778	-1.04833	-1.11956	-1.1253	-0.872639	-1.51461	-0.568023	-1.42343	0.355779	-0.496657	0.367399	-0.666018	-0.881578	-0.0446087	-0.780082	-0.533579	-1.5648	-1.04719	-1.16818
14526	b0388	shikimate kinase II (NCBI)	0.45293	0.36006	0.429416	0.385964	-1.42946	0.580247	0.266087	0.132066	0.313354	0.308459	2.90095	0.272217	0.289439	0.204561	1.02378	-0.152011	0.296723	0.313523	0.290616	0.329254	0.256395	0.193238	0.25018	0.557877	-0.288572	0.272172	-0.0160715	0.28525	0.405592	0.409336	0.337629	0.332092	0.127379	-0.0593235	-0.171382	-0.478236	-0.901661	-0.293693	-0.423225	0.417088	0.209035	0.43425	0.670126	0.0854555	0.393714	0.755727	0.381068
14527	b0389	hypothetical protein (NCBI)	0.432354	-1.9178	-0.41485	-2.14716	-1.82966	-2.53547	-1.87158	-2.03976	-1.8511	-1.8875	-1.89419	-1.94421	-1.92782	-1.98928	-2.08521	-2.26744	-1.94694	-1.92083	-1.94247	-1.91066	-1.95695	-2.01932	-1.96414	-2.24102	-2.37914	-2.12515	-1.28463	-2.8639	-2.01804	-2.006	-2.07522	-2.067	-0.260439	-0.386703	-2.87104	-3.1966	-3.08981	-1.25974	-0.528494	-1.07859	-1.01401	-2.33373	-2.25148	-2.44445	-2.84991	-2.19576	-0.720926
14528	b0390	hypothetical protein (NCBI)	-0.260901	0.0920244	0.172101	-0.228493	-0.35491	-0.153561	0.0962283	0.0850243	0.159254	0.276273	0.108376	0.196302	0.171247	0.138947	0.132079	0.214426	0.170542	0.198718	0.171135	0.221268	0.144592	0.11191	0.114318	2.48374	-0.297401	0.475184	-0.0552965	-0.0845246	0.500653	0.521598	0.451379	0.470098	0.418436	0.452692	0.0461464	0.451533	0.900022	0.166644	-0.74815	0.0289707	0.301948	0.0610539	0.116317	0.125839	-0.0114423	0.702925	0.56691
14529	b0391	hypothetical protein (NCBI)	-0.00421394	-0.370792	-0.774248	-0.0543003	0.597344	-0.760527	-0.501128	0.335098	-0.447628	-0.443568	-0.498354	-0.47188	-0.455865	-0.538233	-0.640585	-0.426873	-0.45782	-0.430186	-0.456192	-0.411402	-0.361261	-0.355368	-0.448392	-0.414848	-0.709917	-0.300566	-0.396858	-0.607155	-0.473082	-0.454777	-0.477522	-0.325786	-0.577015	-0.699538	-0.460347	-0.00454059	-0.188389	-0.793219	-0.0596609	0.0316953	-0.370666	-0.300858	-0.607979	-0.559127	-0.0183524	-0.333661	-0.75736
14530	b0392	hypothetical protein (NCBI)	-0.0859774	0.585425	0.764765	0.638086	-0.0465287	0.232915	0.891375	0.903295	0.93819	0.97222	0.852293	0.910851	0.925262	0.870539	0.740764	0.88051	0.923548	0.94348	0.925098	0.966233	0.910491	0.824965	0.864322	0.608803	0.621971	0.945441	0.631353	0.298315	0.940658	0.945471	0.855436	0.953427	0.741449	0.733363	0.332385	0.207903	0.0434007	0.903751	-0.0033758	0.309354	0.948233	0.850701	0.802228	0.621228	0.727751	0.851566	1.16506
14531	b0393	recombination associated protein (NCBI)	-0.00944509	-0.341347	-0.196737	-0.467915	-0.400659	-0.558208	-0.535794	-0.565718	-0.506723	-0.525817	-0.328098	-0.450504	-0.551139	-0.472224	-0.528887	-0.730041	-0.556616	-0.488431	-0.552246	-0.527208	-0.611667	-0.663401	-0.373799	-0.915822	-0.303096	-0.393521	-0.248305	-0.553189	-0.427307	-0.428383	-0.280202	-0.256935	-0.56279	-0.164299	-0.329276	-0.833582	-0.529548	-0.0213299	-1.05674	0.170219	-0.460128	-0.360533	-0.379526	-0.406691	-0.414389	-0.640165	-0.316877
14532	b0394	possible NAGC-like transcriptional regulator (VIMSS)	-0.0686575	0.35978	0.342948	0.0022766	-0.210115	0.145589	0.355995	0.516465	0.589178	0.407498	0.363828	0.821224	0.407914	0.307978	0.223188	0.185808	0.400502	0.414881	0.404108	0.429997	0.470825	0.334133	0.340791	0.319597	0.52249	0.538433	-0.22805	0.0868217	0.532011	0.532964	0.446792	0.470848	0.396691	0.384085	0.331403	0.306776	0.347824	-0.000365779	-0.157473	-0.463003	0.650084	0.357644	0.425561	0.227763	0.460253	0.658762	-0.175645
14534	b0396	involved in either transport or processing of arabinose polymers (VIMSS)	-0.0779839	0.807597	0.937523	0.864815	0.407322	0.57363	0.847169	0.879811	0.917302	0.922504	0.898415	0.886179	0.904617	0.884179	0.96469	1.25136	0.952626	0.938208	0.923502	0.950198	0.87195	0.863616	0.900574	0.702899	0.500892	0.934676	0.276314	0.156962	0.880042	0.885824	0.825286	0.87016	0.706068	0.75758	0.336379	0.633089	0.533585	0.734392	0.135051	0.199396	0.79969	0.829397	0.791337	0.841177	0.589378	0.763319	0.129471
14535	b0397	exonuclease, dsDNA, ATP-dependent (NCBI)	0.120477	-0.000861902	-0.0859693	0.46162	-0.0463746	0.0532805	-0.0100107	0.0510581	0.0381713	0.0230223	0.066658	-0.0292646	-0.010635	-0.0131356	-0.148745	0.534009	0.0062481	0.020502	0.0080034	0.0275258	0.266848	0.156359	0.0393661	0.0627027	0.172065	1.27677	0.30082	0.00373709	-0.0262479	-0.0249015	-0.00455265	-0.0493816	0.0375654	-0.0464626	0.583955	-0.524795	-0.41889	-0.259255	-0.293787	-0.290702	-0.0528515	-0.0483676	0.0623697	-0.0823097	-0.122478	0.0010406	-0.213206
14536	b0398	exonuclease, dsDNA, ATP-dependent (NCBI)	-0.21938	0.234237	0.480855	0.178183	0.0521093	0.041011	0.29295	0.124265	0.341354	0.325666	0.291882	0.272452	0.291096	0.210506	0.303045	0.782959	0.307811	0.322007	0.309675	0.328625	0.534777	0.18803	0.250502	0.244308	0.0519955	0.397366	0.140967	0.540503	0.5135	0.51548	0.44052	0.461537	0.386544	0.256718	0.486507	0.0571292	0.353432	0.145918	-0.0871968	-0.480281	0.158851	0.160781	0.490518	0.285538	-0.0862174	0.168427	0.458132
14537	b0399	DNA-binding response regulator in two-component regulatory system with PhoR (or CreC) (NCBI)	-0.122018	-1.22968	-1.32047	-0.624651	0.0339998	-0.783592	-1.22943	-1.05708	-1.1961	-1.22424	-1.24543	-1.2862	-1.27539	-1.11812	-1.14061	-1.20151	-1.25157	-1.23775	-1.24895	-0.924413	-1.31005	-1.37412	-1.30834	-1.70422	-1.44745	-0.507826	-0.771298	-0.768709	-1.33496	-1.33854	-1.41323	-1.39244	-1.60825	-0.926701	-0.182585	0.396735	-1.63439	-0.824695	-0.551845	-0.0278963	-1.44529	-1.44179	-1.35406	-1.22564	1.24285	-0.81713	-1.90067
14538	b0400	sensory histidine kinase in two-component regulatory system with PhoB (NCBI)	-0.278562	0.559457	0.518322	0.70408	0.439683	0.442776	0.802332	0.484632	0.815887	0.629419	0.580071	0.710768	0.606898	0.512862	0.56605	0.443023	0.624941	0.639712	0.625684	0.650152	0.572317	0.519947	0.569706	0.268088	0.237299	0.306351	0.183049	0.425836	0.42543	0.426292	0.35111	0.385136	0.242001	0.526448	0.0594604	0.459948	0.849963	0.633717	0.197653	-0.273442	0.71681	0.821445	0.781494	0.584816	0.00988872	0.423402	-0.617819
14539	b0401	predicted branched chain amino acid transporter (LIV-II) (NCBI)	-0.0217395	0.267049	0.250301	0.0598099	0.426729	0.15888	0.298392	0.156133	0.471839	0.351383	0.297375	0.279812	0.431846	0.23581	0.256731	-0.0404831	0.341684	0.355435	0.347323	0.369117	0.427775	0.317192	0.289434	-0.0213252	-0.180721	0.399419	0.280256	0.379318	0.210853	0.213411	0.138257	0.28544	0.209604	0.0607448	-0.24243	-0.0362324	-0.855489	-0.441594	0.00694871	0.167384	0.0938782	0.183754	0.219209	0.146118	-0.267679	0.254782	-0.42808
14540	b0402	predicted cryptic proline transporter (NCBI)	-0.118478	-0.491931	-0.521043	-0.449704	-0.331476	-0.407096	-0.46858	-0.641569	-0.440344	-0.44952	-0.48531	-0.4423	-0.501635	-0.455505	-0.658459	-0.361663	-0.468984	-0.455137	-0.462368	-0.445268	-0.440427	-0.409227	-0.2772	0.138508	-0.0379065	-0.572421	-0.517236	-0.422857	-0.643058	-0.478469	-0.701495	-0.493238	-0.604015	-0.607109	-0.358902	-0.16027	0.408254	0.0327145	-0.171687	0.424838	-0.512004	-0.526267	-0.533386	-0.596111	-0.676657	-0.594033	-0.104016
14541	b0403	maltodextrin glucosidase (NCBI)	0.0391918	-0.626188	-0.350236	-0.722584	-0.128492	0.0604795	-0.41627	-0.508122	-0.389414	-0.400367	-0.00271317	-0.484375	-0.45425	-0.302471	-0.60621	-0.270442	-0.421839	-0.408088	-0.415038	-0.398882	-0.293399	-0.301133	-0.103456	-0.644054	-0.617461	-0.415786	-0.756209	-0.347698	-0.456153	-0.45827	-0.513813	0.0595922	-0.466587	-0.50853	-0.0558219	-0.463797	-0.122814	-0.0782217	-0.245238	-0.172847	-0.255686	-0.453066	1.08247	-0.506394	-0.234847	0.0499921	0.421738
14542	b0404	hypothetical protein (NCBI)	0.162365	0.508533	0.627373	0.249735	-0.29285	-0.254814	0.289633	0.176464	0.34795	0.368218	0.302426	0.309942	0.339751	0.269842	0.188675	-0.0718516	0.375149	0.390139	0.37954	1.24353	0.332354	0.280912	0.29527	0.108276	0.453885	0.46142	0.266492	0.0845346	0.589675	0.59306	0.536901	0.556078	0.344478	0.189671	0.328233	-0.172748	-0.0635829	-0.139213	0.464998	0.249196	0.379574	0.999089	0.42505	0.548913	0.456699	0.0752635	-1.06949
14543	b0405	S-adenosylmethionine:tRNA ribosyltransferase-isomerase (NCBI)	-0.214388	-0.491499	-0.368307	-0.75153	-1.40306	-0.612386	-0.0173396	-0.191782	0.0106061	0.000120117	-0.0342913	-0.0838302	-0.0537038	-0.124039	0.0366911	-0.0724339	-0.0213425	-0.00759689	-0.0145338	0.00156361	-0.0713648	-0.123834	0.0980941	-0.501454	-0.34349	-0.271357	-0.565931	-1.25226	-0.14253	-0.145564	0.231758	-0.182033	0.00531369	-0.544575	-0.775669	0.825448	0.11702	0.246563	0.73993	0.0467516	0.0197141	-0.189761	0.168071	-0.321187	0.211158	-0.264966	-1.77527
14544	b0406	queuine tRNA-ribosyltransferase (NCBI)	-0.542547	1.44543	1.5189	1.39971	0.225674	0.893139	1.8671	1.82286	1.96119	2.01321	1.91538	1.97933	2.00885	1.92733	1.85442	1.59359	2.04664	2.06276	2.04881	2.0878	2.01109	1.8542	1.91054	1.66253	1.64434	1.70072	0.981048	0.994524	1.82822	1.83522	1.77866	1.8542	1.62958	1.54045	0.951087	0.386223	0.753345	1.11391	0.695071	0.00879273	1.5909	1.44427	1.52411	1.32625	0.747103	1.82555	-0.316867
14545	b0407	preprotein translocase subunit YajC (NCBI)	-0.0817419	1.7567	1.99054	1.486	0.696015	0.985911	1.57959	1.49281	1.65293	1.68361	1.60744	1.63118	1.66094	1.59155	2.34249	1.24503	1.69658	1.71178	1.70055	1.73054	1.65542	1.60428	1.61695	1.22161	1.06283	1.43172	0.642577	0.613598	1.55954	1.56249	1.50639	1.52581	1.29743	1.15821	0.90054	1.2527	0.298769	0.998089	0.382076	-0.383114	1.5175	1.5245	1.54444	1.96252	0.831897	1.87277	-0.570676
14548	b0410	hypothetical protein (NCBI)	-0.00148632	-1.10352	-0.235904	-1.05159	-0.032272	-0.66957	-0.904494	-0.178862	-0.883145	-0.897794	-0.922331	-0.967432	-0.952752	-0.501375	-1.09129	-0.768649	-0.902282	-0.888246	-0.896936	-0.879836	-0.865684	-1.01535	-0.801036	-0.907027	-0.660487	-1.14933	-0.405273	-0.588682	-1.0075	-1.00807	-1.07129	-0.49315	-1.27685	-0.0945841	-1.5673	-0.731557	-0.0820277	-0.149694	0.0963883	-0.130988	-0.212469	-0.557761	-0.927239	-0.624276	-0.650015	-1.04266	-0.109723
14549	b0411	nucleoside channel, receptor of phage T6 and colicin K (NCBI)	0.0112647	0.185819	0.0516924	0.115218	0.0195716	-0.192415	1.20435	7.22792	0.834653	0.430171	1.23093	0.159104	0.556092	0.441363	0.113712	0.201609	0.571931	0.563463	0.474704	0.247247	16.3106	16.2582	15.8954	15.9064	15.7835	0.599453	0.564812	0.346325	0.504245	0.147099	0.216209	16.3352	16.1165	15.9788	15.369	-0.321581	0.839761	0.485349	-0.136751	0.36222	-0.14933	-0.0615928	-0.286893	-0.0110401	0.188129	1.20241	3.17275
14550	b0412	orf, hypothetical protein (VIMSS)	0.0204907	1.17971	1.10714	0.752601	0.719126	0.691929	0.855529	0.740649	0.912981	0.889677	0.885628	0.882591	0.89536	0.990116	0.756212	0.612232	0.943999	0.958973	0.92749	0.955601	1.1212	1.06894	0.857602	0.750586	0.988802	0.463814	0.29663	0.209325	0.593303	0.597389	0.520547	0.561731	0.48981	0.576867	0.0375436	0.673105	1.13629	1.27565	-0.359995	0.217031	0.886545	0.869276	0.908464	0.767785	0.484372	0.975513	0.908838
14556	b0418	phosphatidylglycerophosphatase A (NCBI)	-0.570283	-0.813018	-0.290815	-0.311052	-0.652085	-0.882084	-0.410901	-0.562252	-0.377406	-0.402295	-0.385931	-0.423524	-0.0346458	-0.499004	-0.567016	-0.349222	-0.367198	0.0604366	-0.384023	-0.359794	0.0301431	-0.486747	0.0727271	-0.578251	-0.196587	-0.555907	-0.715777	-0.475798	-0.413663	-0.4119	-0.496515	-0.451837	-0.166601	-0.293944	-0.676095	-0.293149	1.62385	-0.67428	-0.909845	0.0565599	-0.576579	-0.335439	-0.523763	-0.344848	0.327504	-0.495802	-1.16097
14557	b0419	putative NAD(P)H-dependent xylose reductase (VIMSS)	-0.238675	-1.06008	-0.992605	-0.475797	-0.815802	-0.787237	-0.858097	-1.02665	-0.834607	-0.866541	-0.841813	-0.754566	-0.598219	-0.969758	-0.666887	-0.761303	-0.8385	-0.842358	-0.854739	-0.833386	-0.615523	-0.804643	-0.634907	-0.494673	-0.72691	-0.89965	-1.31485	-1.0931	-0.759111	-0.75921	-0.682971	-0.577015	-1.05392	-0.675126	-0.351566	-0.258551	-0.687839	-0.929923	-0.64677	-0.0388646	-0.730295	-0.915491	-0.844275	1.39776	-0.586437	-0.600841	0.867917
14561	b0423	thiamine biosynthesis protein ThiI (NCBI)	0.0838137	0.888177	1.14885	0.741032	-0.130118	0.4327	1.09165	0.596756	0.763103	0.756195	0.755538	0.891974	0.756085	0.670528	0.604557	0.802345	0.804981	0.801996	0.787036	0.816726	1.2624	0.8231	0.917069	0.450685	0.386296	0.861501	0.396428	-0.123301	1.00932	1.01484	0.927853	0.974159	0.716429	0.833565	0.250918	0.155485	0.879621	0.275686	0.286622	0.232558	0.908425	0.749852	0.671233	0.521132	0.393069	0.847877	0.152461
14562	b0424	4-methyl-5(beta-hydroxyethyl)-thiazole monophosphate synthesis (VIMSS)	-0.111943	-0.22831	-0.524184	-0.784421	-0.550545	-0.320191	-0.166603	-0.280109	-0.147616	-0.151715	-0.154628	-0.183947	-0.165572	-0.254088	-0.347926	-0.397538	-0.134788	-0.127833	-0.136204	-0.110401	-0.176392	-0.242802	-0.235294	-0.560621	-0.777936	-0.428792	-0.832673	-0.881345	-0.279759	-0.275732	-0.362111	-0.329618	-0.559037	-0.678525	-1.27019	0.383007	0.150145	-0.00757035	-0.594004	-0.0351508	-0.417059	-0.43518	-0.380436	-0.556187	-0.654861	0.355804	-0.153407
14563	b0425	2-dehydropantoate 2-reductase (NCBI)	-0.1916	-0.666725	-0.370933	-0.731691	-0.525979	-0.80716	-0.64992	-1.01832	-0.837122	-0.849987	-0.67448	-0.881125	-0.67102	-0.842862	-1.04178	-0.893844	-0.844058	-0.831117	-0.875051	-0.817441	-0.54352	-0.884368	-0.964919	-0.77967	-0.866361	-0.428157	0.0849181	-0.530175	-0.7494	-0.749976	-0.677731	-0.674988	-0.429236	-0.489522	-0.961861	0.0134883	-1.06248	-0.358167	-1.22629	-0.0929257	-0.777545	-0.354076	-0.599296	-0.743545	-0.637616	-0.860107	-0.0548564
14564	b0426	orf, hypothetical protein (VIMSS)	-0.0300489	-0.363549	-0.408552	-0.591811	-0.746855	-0.251747	-0.298688	-0.0169854	-0.275934	-0.283843	0.039639	-0.311408	-0.298671	-0.40187	-0.471872	-0.466339	-0.274051	-0.260951	-0.305356	-0.0632836	-0.0414916	-0.277443	-0.398896	-0.774052	-0.402913	-0.543469	-0.950858	-1.12988	-0.386797	-0.386795	-0.318197	-0.439591	-0.675098	-0.786818	-0.477897	0.0165812	-0.333393	-0.482339	-0.187285	-0.752271	0.340484	-0.394661	-0.445849	4.3008	0.238138	0.492683	-1.18946
14565	b0427	putative transport protein (VIMSS)	-0.245321	0.168684	0.176338	-0.078989	-0.866216	0.0291589	0.275467	0.289075	0.187007	0.226816	0.325749	0.167425	0.263364	1.54216	0.335099	0.192178	0.225357	0.218867	0.316166	0.317842	0.419534	0.0937159	0.209259	-0.192032	0.0843819	0.0244802	-0.165792	-0.549076	0.104661	0.106267	0.0226705	0.0746525	-0.0240559	-0.0852086	0.13137	0.059185	0.470417	-0.00306578	0.182109	-0.216902	0.298059	0.178072	0.343746	0.239468	0.110321	0.491105	0.413267
14566	b0428	protoheme IX farnesyltransferase (NCBI)	-0.230829	0.738286	0.796065	0.586266	0.329342	1.2899	0.832492	0.967039	0.878616	0.899818	0.893997	0.895811	0.905519	1.01151	0.733417	0.454312	0.938469	0.946348	0.935247	0.969911	0.90135	0.836776	1.01067	0.788941	0.405989	0.328762	-0.15195	-0.571846	0.477486	0.484708	0.397973	0.707091	0.68922	0.764076	0.379471	0.062802	-0.128179	0.396635	-0.909161	-0.460968	1.2089	0.43886	0.461794	0.755264	0.691291	0.556808	-0.77181
14567	b0429	cytochrome o ubiquinol oxidase subunit IV (NCBI)	-0.226625	0.180866	0.598949	0.797817	0.454427	0.240176	0.29588	0.164072	0.342199	0.732786	0.336704	0.319785	0.726867	0.612561	0.17661	0.627809	0.377037	0.373933	0.359328	0.387886	0.320605	0.517175	0.257624	-0.109031	0.700868	0.0525286	-0.42392	-0.637652	0.200641	0.205245	0.118358	0.306858	0.197885	0.13882	-0.293062	-0.0980026	-0.958656	-0.0792435	0.438097	-0.137093	0.144901	0.652432	0.16706	0.00673888	-0.137699	0.215188	-0.0341459
14568	b0430	cytochrome o ubiquinol oxidase subunit III (NCBI)	-0.247546	0.921931	0.975829	0.660419	0.528936	0.407457	1.3624	1.2643	1.42106	1.43423	1.4269	1.42937	1.43908	1.35499	1.67303	1.02318	1.48964	1.48692	1.47116	1.50343	1.62695	1.37626	1.38218	1.00916	0.859533	1.04672	0.524362	0.963251	1.19645	1.20007	1.11525	1.16019	1.07918	0.989082	0.917058	0.442928	0.495098	1.17732	0.145199	-0.8661	1.00333	0.985409	0.996831	0.840028	0.354554	1.02683	-0.276266
14569	b0431	cytochrome o ubiquinol oxidase subunit I (NCBI)	-0.356491	0.666078	0.644282	0.615992	0.00119488	0.590662	0.650794	0.508901	0.682819	0.67763	0.710534	0.701417	0.709788	0.611574	0.544702	0.425267	0.729129	0.743984	0.712854	0.739821	0.685997	0.64421	0.6184	0.509913	0.288347	0.387955	0.100872	0.274405	0.48365	0.486292	0.493039	0.453397	0.375886	0.420802	0.43231	0.246282	0.242093	0.806879	0.20103	-0.449914	0.847208	0.664838	0.792064	0.650076	0.854317	0.952962	-0.0247782
14570	b0432	cytochrome o ubiquinol oxidase subunit II (NCBI)	-0.155881	0.460601	0.393558	0.376502	0.750262	0.198742	0.608734	0.488905	0.627248	0.691119	0.628963	0.630498	0.631424	0.659996	0.841166	0.611003	0.683279	0.698029	0.68564	0.713767	0.745218	0.844128	0.841243	0.574062	0.632476	0.660545	0.047902	0.197388	0.554947	0.569769	0.484888	0.555489	0.298225	0.329974	-0.099037	0.230299	0.135854	0.272745	0.255329	-0.404115	0.480816	0.340045	0.372633	0.363785	0.292517	0.404848	-0.031986
14571	b0433	muropeptide transporter (NCBI)	0.0612565	-0.222865	-0.038506	-0.219857	0.0832844	0.0202452	-0.100167	-0.167891	-0.0826641	-0.100902	-0.0824233	-0.086059	-0.0829166	-0.0668204	0.956437	-0.229926	-0.0602515	-0.0458537	-0.0756321	-0.053038	-0.0706418	-0.0679183	-0.044794	-0.442968	-0.201142	-0.0858895	-0.674614	-0.304074	-0.051093	-0.0499172	-0.0936762	-0.0547356	-0.227585	-0.111365	-0.143533	-0.0793734	-0.0359815	0.0384411	0.00180883	0.0379413	0.1081	0.631855	0.0849278	-0.136697	0.234453	-0.114647	0.000497509
14572	b0434	putative polymerase/proteinase (VIMSS)	-0.26152	-0.164216	0.103121	-0.0904689	-1.00692	-0.254815	0.0475473	0.124265	0.0786941	0.0676993	0.0848343	0.044774	0.0546984	-0.0300389	-0.0791465	-0.280498	0.103464	0.0999295	0.0865926	0.111029	0.0445313	0.0657178	-0.00188971	-0.288644	-0.319605	-0.0700946	-0.432149	-0.37894	0.0801581	0.0807948	-0.00369208	0.159226	-0.214839	-0.144952	-0.411784	0.501426	-0.630371	-0.218301	-0.686338	-0.24673	0.238949	0.269575	0.0835944	-0.0724296	0.228529	0.220285	0.434166
14573	b0435	possible regulator of murein genes (VIMSS)	-0.348176	0.189551	0.296837	0.299898	-0.554236	0.0023412	0.251789	0.127395	0.292784	0.302551	0.308303	0.286363	0.298939	0.211444	0.59945	-0.11792	0.331885	0.339375	0.329426	0.360373	0.292346	0.407035	0.242449	-0.136405	0.32011	0.251645	-0.0838719	-0.912428	0.222192	0.224882	0.13821	0.184336	0.00770818	-0.0784827	-0.0722013	0.473084	0.689143	0.478273	-1.03071	-0.26625	0.245104	0.316647	0.54231	0.0829378	0.413373	0.100267	0.531942
14574	b0436	trigger factor (NCBI)	0.177437	0.521737	0.561832	0.0330105	-0.310077	0.0148203	0.0740227	0.268342	0.446053	0.106106	0.119613	0.264007	0.0948634	0.129631	0.0932869	0.0416089	0.126893	0.13401	0.125159	0.152518	0.0852014	0.171971	0.038299	-0.189031	-0.254629	0.113653	-0.0831924	0.014689	0.267987	0.27126	0.184523	0.230681	-0.0242528	0.0774028	-0.0838385	0.433069	-0.00129899	0.0558261	-0.191876	0.0856554	0.345121	0.434503	0.496617	0.228847	-0.0718998	-0.0197197	-1.24609
14575	b0437	ATP-dependent Clp protease proteolytic subunit (NCBI)	-0.551523	2.20029	2.25095	2.23373	1.27446	1.40407	2.00332	1.96637	2.09708	2.13577	2.10047	2.15093	2.1604	2.07684	2.02844	2.12356	2.21313	2.21135	2.19282	2.23407	2.30428	2.3434	2.27256	1.73978	1.58739	2.40329	2.05324	1.71494	2.55178	2.56501	2.47912	2.52458	2.43694	2.26089	2.5073	1.1514	1.52837	1.85148	0.632095	0.560058	2.46041	2.20011	2.17674	2.16579	1.57007	2.39171	1.75113
14576	b0438	ATP-dependent protease ATP-binding subunit (NCBI)	-0.448664	2.11273	2.15282	1.99468	0.545229	1.61691	1.70895	1.85403	1.78406	1.82313	1.77642	1.82878	1.8411	1.75817	1.69258	1.43956	1.87619	1.88467	1.87179	1.91218	1.84284	1.78486	1.78614	1.54186	1.40965	2.09368	1.53529	1.23586	2.24667	2.25831	2.17064	2.21739	1.982	2.01596	1.16202	1.47764	1.53662	2.02101	0.991799	0.768571	2.31964	2.29756	2.26844	2.17366	3.22338	1.73722	1.56774
14577	b0439	DNA-binding ATP-dependent protease La (NCBI)	-0.525463	3.66735	3.63229	3.27289	2.24559	2.78818	3.43617	3.52413	3.58695	3.69552	3.57853	3.75533	3.80232	3.68617	3.62172	3.40234	3.80749	3.81849	3.79817	3.95951	3.79005	3.73458	3.71383	3.48227	3.20992	3.7347	2.97176	2.7452	3.88533	3.90989	3.87403	3.86863	3.63212	3.51934	2.84264	2.27842	2.01431	2.85105	1.15933	-0.83827	3.38279	3.34974	3.28992	3.21918	2.77746	3.3037	0.914854
14578	b0440	HU, DNA-binding transcriptional regulator, beta subunit (NCBI)	-0.119115	0.43987	0.386411	0.0815875	0.547888	0.0757681	0.657195	0.53014	0.949649	0.704993	0.6905	0.686156	0.698768	0.901365	0.54911	0.489806	0.731268	0.738613	0.729085	0.758626	0.691048	0.632039	0.643255	0.590378	0.860398	0.270281	-0.163373	0.441855	0.424585	0.427352	0.340672	0.386855	0.152708	0.410146	-0.0606791	-0.6343	0.287305	0.106516	0.423886	-0.201562	0.387488	0.364816	0.403466	0.22454	0.0109765	4.3657	1.43675
14579	b0441	peptidyl-prolyl cis-trans isomerase (rotamase D) (NCBI)	-0.418339	0.0693719	0.345174	0.308468	-0.169923	0.0860764	0.184624	0.26054	0.225245	0.290379	0.281542	0.311744	0.218711	0.137878	0.166696	0.186277	0.251137	0.264706	1.30147	0.282523	0.312081	0.269948	0.332806	-0.0217868	0.318227	0.230414	-0.194696	0.176833	0.245448	0.251818	0.165178	0.197757	0.149398	0.269181	0.0481738	0.122897	-0.0553065	-0.0215432	-0.0993496	-0.0480023	0.0402053	0.139595	0.278495	-0.0106149	-0.027256	0.039231	0.0927275
14580	b0442	hypothetical protein (NCBI)	0.00634986	-0.834839	-0.48681	-1.07141	0.0997601	0.259991	-0.909676	-0.00581918	-0.890504	-0.90491	-0.906641	-0.938507	-0.627656	-0.25841	-0.428216	-1.02611	-0.900339	1.06436	-0.931216	-0.597752	-0.946019	-0.701458	-0.241017	-0.737555	-0.417824	-1.14845	-1.9028	-0.549259	-0.986793	-0.983097	-1.06944	-1.03705	-1.27527	-0.820059	-0.688844	-1.16543	0.930824	-0.444051	-0.63339	0.40008	-1.04257	-0.570939	-0.431027	-1.20551	-0.827368	-0.902414	1.12336
14581	b0443	hypothetical protein (NCBI)	0.00966091	0.0203172	0.291175	0.151724	0.60568	0.0692001	0.295426	0.690826	0.33183	0.336506	0.300512	0.315616	4.11004	0.458121	0.397814	1.00451	0.354494	0.331468	0.32077	0.382503	0.521484	0.244272	0.41787	0.465792	0.0990167	0.597011	-0.170052	0.0856236	0.389015	0.39064	0.289729	0.337773	0.106817	0.246554	0.0258273	0.078056	-0.0305558	0.490398	-0.432448	0.295745	0.183361	0.146542	0.201138	0.0203479	0.280139	0.265422	-0.0790291
14582	b0444	predicted aluminum resistance protein (NCBI)	0.0307158	-0.584685	-0.450326	0.060928	0.0387253	-0.0873313	-0.310229	-0.0267687	-0.281337	-0.150561	-0.29758	-0.314184	-0.122857	-0.347988	-0.445372	-0.150213	-0.275435	-0.262255	-0.306897	-0.199669	-0.170938	0.0305465	-0.321252	-0.354943	-0.381974	-0.141287	0.00340956	-0.202079	-0.195564	-0.191431	-0.277822	-0.102991	0.00795795	-0.0778349	0.358872	-0.586525	-0.127281	0.690143	-0.532806	-0.193603	-0.0151205	-0.2218	-0.285505	-0.158728	0.143681	1.1182	-1.00429
14583	b0445	predicted transporter subunit: periplasmic-binding component of ABC superfamily (NCBI)	-0.00460405	-0.150786	-0.26515	-0.21719	-0.0395758	0.222184	-0.277065	-0.340104	-0.169545	-0.245671	-0.153307	-0.208593	-0.224065	-0.250849	-0.342917	-0.383906	-0.224502	-0.217357	-0.226287	-0.198642	-0.26608	-0.32532	-0.31239	-0.578398	-0.349389	-0.468388	-0.392559	-0.68851	-0.313815	-0.312418	-0.398947	-0.352887	-0.400908	-0.24274	-0.284704	-0.21903	-0.247665	-0.254475	-0.402674	0.0883531	-0.269649	-0.292278	-0.266642	-0.275539	-0.406174	-0.238284	-0.663348
14584	b0446	orf, hypothetical protein (VIMSS)	-0.127685	-0.82504	-0.587762	-0.171223	-0.197137	-0.00537308	-0.504225	-0.657522	-0.30528	-0.481288	-0.49515	-0.508762	-0.495216	-0.507457	-0.074706	-0.0348247	-0.464231	-0.457218	-0.465757	-0.439356	-0.101387	-0.442247	-0.533433	-0.617204	-0.715838	-0.601214	-0.0185545	0.435218	-0.516914	-0.510722	-0.597173	-0.301201	-0.439389	-0.315475	0.141094	-0.800027	-1.38299	0.118299	-1.02023	0.509095	-0.56818	-0.586036	-0.392498	-0.277749	0.392079	-0.711606	-0.883585
14585	b0447	putative LRP-like transcriptional regulator (VIMSS)	-0.0334359	0.570434	0.240284	0.130741	0.452132	0.00335595	0.709193	0.581445	0.752541	0.759316	0.717248	0.935746	0.934028	0.716129	0.58099	0.644329	0.778136	0.791693	0.745936	0.809416	0.736729	0.75579	0.78875	0.337775	0.275771	0.142517	-0.489734	-0.390702	0.298975	0.308707	0.444919	0.254787	0.272422	0.641726	0.296556	1.32215	-0.037041	-0.0824367	0.544141	0.000348093	3.07714	0.421047	0.403158	0.405224	0.350654	0.409911	0.734259
14586	b0448	fused predicted multidrug transporter subunits of ABC superfamily: ATP-binding components (NCBI)	-0.145195	0.121349	0.353453	0.0750504	-0.271822	0.144193	0.123355	0.363324	0.279402	0.176316	0.247175	0.159104	0.172889	0.263415	0.0974042	0.47174	0.199102	0.212861	0.166519	0.313301	0.158663	0.19091	0.117247	0.122473	0.136133	0.037652	-0.00987418	0.556049	0.194029	0.205289	0.19239	0.151217	0.0408233	0.0911073	0.248971	0.0872396	0.0649239	0.287802	0.393352	-0.244587	0.190669	0.246848	0.200481	0.351776	-0.197067	0.138381	0.629404
14587	b0449	fused predicted multidrug transporter subunits of ABC superfamily: ATP-binding components (NCBI)	-0.142316	-0.527132	-0.103429	-0.337631	-0.0959158	-0.429199	-0.124748	-0.240185	-0.251533	-0.269648	-0.278463	-0.30168	-0.192646	-0.360784	-0.418865	-0.59308	-0.257683	-0.250904	-0.258759	-0.234623	-0.224192	-0.343947	-0.326302	-0.447707	-0.503889	-0.0745179	0.873271	-0.988658	-0.254167	-0.247795	-0.241916	-0.0696405	0.019967	-0.364578	-0.409294	-0.45399	-0.728953	-0.563964	-0.133315	0.0344138	-0.152337	-0.244665	-0.0333455	0.0981228	-0.541754	-0.412986	-0.12214
14588	b0450	nitrogen assimilation regulatory protein for GlnL, GlnE, and AmtB (NCBI)	-0.329884	1.42208	0.827259	0.52472	0.808445	-0.0128739	0.984984	0.90431	1.05876	1.07971	1.03119	1.07827	1.09151	1.01958	0.962031	0.700781	1.12522	1.13343	1.12136	1.45096	1.0901	1.0488	1.0539	0.681032	0.91541	1.21462	0.474318	0.876088	1.36249	1.379	1.2914	1.33796	1.10568	1.52974	0.341198	0.012273	1.09803	0.55588	1.475	-0.694773	1.036	1.01434	1.0195	0.90275	1.49006	1.77575	2.49833
14589	b0451	ammonium transporter (NCBI)	0.0598391	-0.92996	-1.09129	-0.829523	-0.227693	-0.35903	-1.0033	-1.17335	-0.650561	-1.00046	-0.68538	-0.683344	-1.02361	-0.554338	-1.04376	-0.996585	-0.767501	-0.980956	-0.992996	-0.972747	-1.03959	-1.07152	-0.615816	-0.843367	-1.20704	1.18491	-0.617083	-1.04887	-0.815335	-0.809817	-0.896193	-0.849135	-0.903596	-0.732264	-0.521415	-0.701555	-0.1989	-0.745786	-0.553606	0.0737508	-0.524373	1.37458	-0.876627	-0.489754	-0.775569	-0.920268	0.378217
14590	b0452	acyl-CoA thioesterase II (NCBI)	0.0277609	-1.50399	-0.950788	-1.38278	0.0300174	-0.646774	-1.39836	-1.35198	-1.36553	-1.39369	-1.37265	-1.43548	-1.42179	-1.47568	-1.54048	-1.23778	-1.38019	-1.38425	-1.39603	-1.37663	-1.44238	-0.834525	-1.28238	-0.824308	-1.25343	-1.34341	-1.33617	-0.950074	-1.36524	-1.36064	-1.44447	-1.24251	-0.500855	-1.1927	-0.446124	-0.287245	-0.523549	-1.009	-0.773888	-0.211164	-1.26799	-0.92069	-1.39234	-1.40441	-0.0160551	-1.23933	-1.42446
14591	b0453	glycoprotein/polysaccharide metabolism (VIMSS)	-0.0371799	-0.494909	-0.431134	0.108772	0.072576	-0.429997	-0.558548	-0.717053	-0.265693	-0.0712039	-0.10717	-0.576989	-0.563353	-0.424497	-0.494155	-0.73806	-0.521307	-0.525156	-0.537564	-0.516132	-0.371572	-0.610187	-0.588115	-0.582758	-0.699936	-0.40876	-0.352791	-0.900492	-0.455733	-0.449486	-0.533499	-0.484776	-0.708818	-0.228342	-0.669246	-0.00681985	-1.07057	-0.588145	-0.0748782	-0.0173546	-0.1967	-0.379029	-0.51769	-0.374653	0.188235	0.158758	0.883255
14592	b0454	predicted methyltransferase (NCBI)	0.0760955	-0.437019	-0.232348	0.453659	-0.802768	-0.513376	-0.353482	-0.506657	-0.313076	0.0808394	-0.319777	-0.360957	-0.347993	-0.401597	-0.462025	-0.734301	-0.301047	-0.286832	-0.316072	-0.295228	-0.364806	-0.392649	-0.124518	-0.205337	0.194289	-0.286081	-0.678835	-0.556721	-0.164197	-0.157139	-0.232437	-0.192474	-0.307828	-0.39279	-0.866357	-0.672188	0.964984	0.54825	0.582137	0.803545	0.0963672	-0.154837	-0.124289	-0.269011	-0.496304	-0.217314	0.619626
14593	b0456	hypothetical protein (NCBI)	-0.15949	0.235693	0.28488	0.920917	0.036199	0.199609	0.767232	0.667258	0.839175	1.20007	0.830446	0.82727	0.835797	1.31482	0.72752	1.01139	0.884833	0.881937	0.872732	0.897255	0.829854	0.802705	0.81645	0.442427	0.329286	0.965642	0.235656	-0.24657	0.520841	0.532374	0.45118	0.496072	0.27568	0.548957	-0.0205281	1.08638	0.246177	-0.1153	0.85454	-1.11323	0.355558	0.344773	0.343099	0.222023	-0.312318	0.520381	1.64334
14594	b0457	orf, hypothetical protein (VIMSS)	0.0068994	0.37337	0.372356	0.273318	0.329162	0.332907	0.273673	0.194992	0.402043	0.3432	0.435657	0.297054	0.345055	0.328845	0.262653	0.403706	0.357713	0.372306	0.363959	0.379116	0.312992	0.4143	0.379659	0.50868	0.42713	0.341235	0.358325	0.596062	0.33146	0.341012	0.265436	0.367597	0.326279	0.356696	0.273428	0.262765	0.2568	0.216307	-0.0649559	0.106234	0.20827	0.125055	0.137807	-0.010658	-0.138089	0.183408	-0.118829
14595	b0458	orf, hypothetical protein (VIMSS)	-0.0158241	-0.586324	-0.541242	-0.296443	0.106683	-0.389323	-0.618106	-0.762131	-0.557051	-0.56952	-0.584155	-0.502134	-0.608865	-0.154858	-0.722091	-0.608231	-0.561609	-0.54727	-0.554859	-0.554795	-0.211282	-0.451436	-0.423151	-0.999709	-0.500048	-0.504378	1.89422	0.863822	-0.385454	-0.374002	-0.449808	0.1957	-0.0470709	-0.351386	-0.243037	-1.26809	0.0286163	-0.984268	-0.0607476	-0.343941	0.160172	-0.238455	-0.244685	1.13444	1.30876	-0.718581	0.605774
14596	b0459	maltose O-acetyltransferase (NCBI)	-0.0434467	0.571567	0.677766	0.662016	0.232874	0.487678	0.653127	0.62005	0.734768	0.739792	0.770054	0.700053	0.712844	1.77273	0.731362	0.772527	0.761316	0.776209	0.766978	0.772298	0.718417	0.748037	0.691074	0.506301	0.540875	0.629038	0.27665	0.249525	0.731445	0.881166	0.784933	0.706407	0.680474	0.655793	0.455437	0.317323	0.456032	0.602862	-0.373141	-0.31718	0.854863	0.787284	0.874203	0.663383	0.438284	0.658399	-0.222074
14597	b0460	modulator of gene expression, with H-NS (NCBI)	0.464219	2.52261	2.55782	2.25313	1.21962	1.99259	2.29486	2.27411	2.42073	2.46478	2.39292	2.45423	2.63962	2.41457	2.35577	2.21206	2.51802	2.53424	2.52109	2.53905	2.52979	2.44712	2.4458	2.18384	1.9717	2.85555	2.37509	1.83863	2.84005	2.85966	2.78297	2.82391	2.59951	2.73935	2.2551	2.26737	1.34321	2.80247	0.526518	0.223845	2.73372	2.7179	2.66808	2.60014	2.04676	2.32346	2.34913
14598	b0461	hypothetical protein (NCBI)	-0.101012	2.28832	2.356	2.05805	1.00012	1.47231	2.11516	2.08894	2.24166	2.28706	2.29986	2.40972	2.2905	2.23843	2.18991	1.92881	2.42494	2.35836	2.34495	2.36377	2.42171	2.27174	2.33688	1.91201	1.80524	2.12112	2.2545	1.43552	2.22218	2.24286	2.16603	2.46259	2.22233	2.03715	1.61698	1.48437	1.1744	2.06264	0.593464	-0.431648	2.27555	2.27312	2.21372	2.15654	1.58993	2.42248	1.16027
14599	b0462	multidrug efflux system protein (NCBI)	0.0144007	0.321716	-0.370319	-0.37973	-0.840331	-0.785234	-0.307173	-0.444639	-0.271584	-0.249746	-0.0898134	-0.271639	-0.295335	-0.2508	-0.436854	-0.358471	-0.276507	-0.262223	-0.269655	-0.270166	-0.323151	-0.286029	-0.255463	-0.503672	-0.316465	-0.432836	-0.653207	-0.628242	-0.340606	-0.333341	-0.361252	-0.294785	-0.447545	-0.37263	-0.662041	0.11693	-0.159433	-0.369796	-0.289369	-0.00756502	-0.255429	-0.0902584	-0.292563	-0.307623	-0.128947	0.565023	0.288061
14600	b0463	multidrug efflux system (NCBI)	0.246785	-0.543094	-0.106928	-0.186922	-0.294536	-0.0180275	-0.415157	-0.608539	-0.287125	-0.311392	-0.427743	-0.392746	-0.37843	-0.451182	-0.568128	-0.363525	-0.408285	-0.394391	-0.400679	-0.384337	-0.455543	-0.135271	-0.245663	-0.749412	-0.619675	-0.565016	-0.212332	0.103931	-0.416653	-0.513248	-0.583246	-0.24901	-0.244123	-0.439025	-0.37961	0.316185	-0.954332	-0.160963	-0.47172	0.422691	-0.249077	-0.506328	-0.321513	-0.461199	-0.514957	-0.365713	-0.313732
14601	b0464	DNA-binding transcriptional repressor (NCBI)	-0.282653	0.282973	0.210204	0.159641	-0.00369935	-0.104688	0.362827	0.360066	0.384398	0.392649	0.362059	0.393178	0.418315	0.289945	0.356507	0.0466836	0.393877	0.407844	0.401338	0.505287	0.424281	0.408362	0.469934	0.0525374	0.237152	0.345162	0.288531	0.144965	0.453227	0.457937	0.386874	0.468248	0.404948	0.363221	0.0352967	0.376982	-0.20917	0.112122	-0.676913	-0.403721	0.0877182	0.147217	1.06631	0.323059	-0.18148	1.83799	0.42215
14602	b0465	fused conserved protein (NCBI)	0.0708791	-0.279419	-0.210587	-0.0284492	-0.156583	-0.192384	-0.216472	-0.192137	-0.19928	-0.191705	-0.230036	-0.263977	-0.174623	-0.259928	-0.25046	-0.262449	-0.208254	-0.194948	-0.144098	-0.185328	-0.207041	-0.141106	-0.20277	-0.212668	-0.246078	-0.276439	-0.456089	-0.449146	-0.240086	-0.224511	-0.23989	-0.0213579	-0.419609	-0.222607	-0.0474886	0.035286	-0.115284	-0.215786	-0.0406286	-0.0997338	-0.0104783	-0.272187	-0.369192	0.269841	0.477521	-0.17636	0.112636
14604	b0467	primosomal replication protein N'' (NCBI)	-0.0459963	-0.139573	0.315495	-0.0932576	-0.0907534	0.588463	-0.0419204	-0.237409	-0.02273	-0.0137193	-0.0534745	-0.0851219	0.0901153	-0.0756923	0.0541602	0.147323	-0.0293676	-0.0160282	-0.0207044	-0.00619668	-0.0711961	0.307994	-0.0721057	0.0294199	0.236108	0.0614193	0.0993498	0.0715604	0.170271	0.186055	0.115681	0.14877	0.215544	0.459363	0.549643	0.915076	0.077195	-0.0986947	-0.203498	0.154828	-0.0455191	0.00633922	-0.00945522	-0.0718906	-0.058161	0.270505	-0.139315
14605	b0468	conserved inner membrane protein (NCBI)	-0.087103	0.371075	-0.123493	-0.413282	0.215402	-0.966414	0.109692	0.140545	0.130565	0.141358	0.09979	0.0715243	0.173736	0.02299	-0.0299234	0.222705	0.127445	0.140863	0.135956	0.151224	0.086082	0.0639484	0.498954	0.0195294	0.127258	0.344527	2.54789	-0.0791018	0.128543	0.143513	0.216296	0.106301	0.197251	0.21511	-0.305032	-0.122965	-0.205234	-0.0193685	-0.224554	0.392067	0.0296177	0.0757452	0.0497976	-0.0867495	0.0273056	0.0632297	-0.0903332
14606	b0469	adenine phosphoribosyltransferase (NCBI)	-0.424124	0.240748	-0.113365	-0.406696	-0.225652	0.138001	0.0886984	0.721724	0.106776	0.112148	0.0844452	0.215693	0.0782945	0.300335	-0.0477724	0.14542	0.159028	0.125044	0.118809	0.134822	0.0629861	0.0425298	0.0629318	-0.310883	0.00327874	-0.0472547	-0.571461	1.34146	0.0174741	0.0205279	-0.0503506	0.173957	-0.0237189	-0.0958745	-0.234838	0.496274	-0.0449013	-0.182221	-0.39937	0.48723	-0.0803397	0.0542097	-0.0443565	0.494143	0.913703	0.325373	0.457288
14608	b0471	hypothetical protein (NCBI)	-0.202408	0.204862	0.255163	0.873795	0.348768	0.800603	0.468596	0.348332	0.518706	0.556397	0.495716	0.527723	0.549084	0.478525	1.40087	0.147781	0.585128	0.600303	0.590244	0.61876	0.544487	0.525101	1.01292	0.165828	0.0596996	0.845701	0.142787	-0.0841766	0.953044	0.966923	0.89483	1.25196	1.05916	1.53506	1.4936	-0.436079	0.323029	1.26644	0.250995	-1.23852	0.569433	0.574138	0.573611	0.452091	-0.106092	0.749188	-1.01917
14609	b0472	recombination protein RecR (NCBI)	-0.143442	-0.61468	-0.745844	-0.906601	-1.39272	-0.872406	-0.504644	-0.542559	-0.497392	-0.326351	-0.293885	-0.5647	-0.542921	-0.616732	-0.673114	-0.293394	-0.510819	-0.497284	-0.502514	-0.489752	-0.434239	-0.463548	-0.414365	-0.170376	-0.921005	-0.544658	-0.778339	-1.52794	-0.511234	-0.509233	-0.579995	-0.544579	-0.740581	-0.325687	-0.1331	-0.162983	-0.463128	-0.486134	0.179382	0.154727	-0.553345	-0.597063	-0.768307	0.266999	-0.138425	-0.760083	-0.939057
14610	b0473	heat shock protein 90 (NCBI)	-0.110513	-0.592391	-0.41631	0.164225	-1.03876	-1.24974	-0.613323	-0.498521	-0.556976	-0.60803	-0.45002	-0.669933	-0.629366	-0.721955	-0.679694	-0.50333	-0.535138	-0.602358	-0.607737	-0.466388	-0.58158	-0.578959	-0.663687	-0.844126	-1.0143	-0.683313	-0.888222	-0.878648	-0.598138	-0.595949	-0.505596	-0.631314	-0.679521	-0.576093	-0.633845	0.058835	0.276507	-0.41677	-0.0724469	0.164811	-0.699065	-0.730878	-0.770507	0.0131399	-0.876352	0.263795	3.26236
14613	b0476	acetyl esterase (NCBI)	-0.128041	-0.421658	-0.251834	-0.199714	-0.0504473	-0.559194	-0.139546	-0.33784	-0.124793	-0.122134	-0.147063	-0.179499	-0.157787	-0.0954661	-0.287682	-0.174116	-0.125103	-0.0666862	-0.117311	-0.102018	-0.0459668	-0.038862	-0.173169	0.00229895	-0.269363	-0.426811	-0.827253	1.14326	-0.447371	-0.445287	-0.516058	-0.480642	-0.676674	-0.48015	-0.203076	-0.503995	-0.72184	-0.116649	-0.421888	-0.0459213	-0.108909	-0.098295	-0.205091	-0.352935	-0.347781	-0.149497	-0.0438173
14614	b0477	inosine/guanosine kinase (NCBI)	-0.188316	0.416926	-0.0206766	0.175451	0.0544945	-0.504922	0.0865176	-0.0168391	0.105039	0.222836	0.442474	0.0560725	0.0777565	0.302878	0.0322709	0.16249	0.110705	0.124613	0.118282	0.226056	0.113323	0.0746361	0.127468	-0.0446919	-0.335726	0.570248	-0.0260042	-0.397415	0.284033	0.295324	0.230646	0.263774	0.120081	0.113651	0.120513	1.94509	0.138427	-0.165759	0.506245	0.180857	-0.0609197	-0.0670873	-0.0421435	-0.179152	0.020865	0.0171311	0.134434
14615	b0478	predicted transporter with NAD(P)-binding Rossmann-fold domain (NCBI)	0.0845448	0.485503	0.593138	0.760792	0.262897	0.0084522	0.797242	0.744357	0.661075	0.680598	0.633996	0.757578	0.723797	0.809429	0.577245	0.520642	0.690717	0.705334	0.696912	0.865254	0.65815	0.73742	0.88759	0.807885	0.413437	0.497981	0.24682	0.172931	0.558558	0.564198	0.514933	0.583592	0.494497	0.650598	0.305337	0.396702	0.307768	0.548981	-0.313958	0.299028	0.386594	0.274113	0.29153	0.316076	0.10848	0.504129	0.771015
14616	b0479	predicted fosmidomycin efflux system (NCBI)	-0.0673666	-0.40159	-0.347488	-0.0921096	0.336304	-0.171202	-0.381311	0.00506366	-0.351749	-0.350748	-0.137263	-0.41403	-0.207482	-0.296064	-0.205431	0.188438	-0.36034	-0.346183	-0.35324	-0.350507	-0.407737	-0.16961	-0.244323	-0.482277	-0.100804	-0.545439	-0.129309	-0.601964	-0.437004	-0.434661	-0.505461	-0.470038	-0.0628027	-0.560706	-0.928591	1.16988	-0.74834	-0.483935	0.579588	-0.688214	0.0283253	-0.51044	-0.10636	-0.167923	-0.387941	-0.558022	-1.66643
14617	b0480	UDP-sugar hydrolase (NCBI)	-0.0383029	0.517857	0.442685	0.611944	-0.256804	0.274409	0.339778	0.331905	0.391937	0.409748	0.859365	0.365718	0.387286	0.316504	0.257831	-0.0108306	0.418639	0.433207	0.424933	0.447723	0.459187	0.336126	0.507584	0.229896	0.351837	0.382671	-0.0952519	0.0396034	0.24414	0.24892	0.199562	0.311843	0.165962	0.254869	0.00551513	0.396686	0.228896	0.643733	-0.328471	0.210502	0.597556	0.526732	0.405008	0.279344	0.381758	0.220461	0.590054
14618	b0481	hypothetical protein (NCBI)	-0.047317	-0.149742	0.573845	0.434896	0.892393	0.331835	0.194191	0.0627469	0.254062	0.280633	0.232325	0.633649	0.265959	0.195234	0.136658	-0.132704	0.298327	0.915405	0.303851	0.330491	0.254269	0.218356	0.250772	-0.11928	-0.225191	-0.0512415	-0.279996	-0.438862	0.0655742	0.0730766	0.677975	0.037254	-0.1599	-0.283196	1.45158	0.123522	1.58826	-0.645165	-0.446081	0.481329	-0.18032	-0.173625	-0.172936	-0.29056	-0.853077	-0.270236	-1.39123
14619	b0482	hypothetical protein (NCBI)	-0.0733206	-0.362309	0.449764	-0.479298	0.260278	-0.757213	-0.32133	-0.483866	-0.281198	-0.275087	0.388967	-0.326753	-0.315042	-0.395393	-0.184362	-0.162567	-0.021891	-0.277795	-0.281537	-0.264135	-0.156992	-0.121792	-0.31404	-0.429419	-0.27606	-0.35415	-0.507755	-0.189351	-0.224175	-0.215468	-0.296349	-0.251665	-0.0915434	-0.589166	-0.153437	-0.341368	0.0458513	-0.680725	0.265517	0.175136	-0.453957	-0.445549	-0.434948	0.505413	-0.731664	-0.162252	-0.919856
14620	b0483	orf, hypothetical protein (VIMSS)	0.08758	-0.597078	0.284134	-0.380004	-0.155032	-0.646318	-0.223674	-0.385381	-0.17873	0.0141635	-0.185946	-0.230017	-0.221891	-0.306037	-0.394757	-0.18581	-0.188936	-0.18563	-0.1852	-0.168522	-0.013423	-0.267401	-0.0917418	-0.608549	-0.231047	-0.51429	-0.708381	-1.20367	-0.38074	-0.376774	-0.454762	-0.405683	-0.459979	-0.741599	-0.529599	0.323319	0.50443	-0.311084	-0.718938	0.0399883	0.537827	-0.448163	-0.438705	-0.287773	-0.467756	-0.595891	-1.19365
14621	b0484	copper transporter (NCBI)	-0.015775	-0.396704	-0.322171	-0.265692	-0.432515	-0.503022	-0.0754749	-0.097107	-0.138627	-0.206705	-0.200757	-0.236595	-0.178337	-0.204708	-0.194148	-0.0123425	-0.146162	-0.191614	1.02936	-0.173353	-0.157994	-0.0859747	-0.0780342	-0.179583	-0.00116965	0.749527	0.292696	-0.793215	-0.218772	-0.213188	-0.291357	-0.242254	-0.37731	-0.114559	-0.0190447	-0.0177963	-0.223447	0.283813	-0.218174	-0.00715624	0.0146784	0.216933	-0.123571	-0.143294	-0.083701	-0.115074	0.148528
14622	b0485	predicted glutaminase (NCBI)	-0.155354	-0.679403	-0.810001	-0.545514	-0.918197	-0.494369	-0.897854	-0.580407	-0.866859	-0.882978	-0.593191	-0.910059	-0.902453	-0.56829	-1.07667	-0.590996	-0.871872	-0.865604	-0.194979	-0.652452	-0.360179	-0.973962	-0.921245	-0.410332	-0.992135	-1.05985	-1.73849	-0.0179623	-0.922068	-0.916078	-0.994441	-0.961036	-1.16249	-0.359821	-0.820964	-0.296662	0.402987	-0.206333	-0.431786	-0.355675	-0.766976	-0.49644	-0.966492	-0.84003	-0.50616	-0.780646	-0.827725
14623	b0486	predicted transporter (NCBI)	0.0801854	-0.0561238	0.00693013	-0.00351683	0.112929	0.28748	-0.0110286	0.037763	0.0301797	0.0271927	-0.011568	0.164508	0.0169208	-0.0706948	-0.050344	-0.239621	0.042382	0.0266031	0.0472815	0.0728273	-0.0442428	-0.0512139	-0.0143172	-0.281766	0.109707	2.47658	-0.481824	0.0761901	-0.0988572	-0.0830335	-0.178662	-0.00279244	-0.23803	0.324702	-0.282492	-0.312576	-0.653404	0.180301	0.142643	0.163781	-0.248479	-0.153242	-0.237612	-0.362385	-0.211196	0.111099	0.643985
14624	b0487	DNA-binding transcriptional activator of copper-responsive regulon genes (NCBI)	0.121509	0.21569	0.446409	0.188231	0.419239	-0.0472177	0.500078	0.359429	0.546692	0.548073	0.504921	0.528196	0.540811	0.453355	0.522759	0.137659	0.566527	0.55088	0.571165	0.716095	0.480781	0.473957	0.509715	0.156117	0.017416	0.596085	0.580543	-0.30859	0.72851	0.746785	0.921109	0.701479	0.50669	0.757955	0.132488	-0.234641	-0.0297478	-0.0155053	0.824393	0.260512	0.229771	0.241115	0.241133	0.1213	-0.417472	0.392537	1.45581
14625	b0488	conserved inner membrane protein (RefSeq)	-0.00906026	0.0973963	0.266553	-0.0301662	-0.191662	-0.336986	0.245533	0.111402	0.294229	0.293108	0.267061	0.276822	0.284304	0.199749	0.16413	0.0262297	0.31592	0.322666	0.316282	0.343029	0.252422	0.717423	0.265848	-0.110244	-0.240071	0.721992	0.0451764	0.377122	0.318823	0.336376	0.240554	0.288659	0.0931369	-0.0538531	-0.364663	-0.0714996	1.09891	-0.1654	-0.0653152	-0.573731	0.0606828	0.140628	0.0735115	-0.0363058	-0.0932466	0.806178	-1.24949
14626	b0489	predicted protease, membrane anchored (NCBI)	0.0242566	0.0646877	-0.195272	-0.58824	-0.322244	-0.863645	-0.268421	-0.433418	0.0424771	0.112277	-0.231569	-0.116742	-0.271074	-0.35594	-0.445187	-0.345173	-0.240617	-0.234378	-0.239263	-0.217364	-0.307184	-0.342779	-0.117323	-0.668483	-0.405524	-0.183906	-0.493534	-0.302644	-0.316412	-0.301993	-0.108304	-0.349537	-0.544553	-0.410553	-0.636568	-0.613358	-0.00271342	-0.576836	0.133852	0.00805334	-0.314191	0.159028	-0.0129648	0.193724	-0.497667	-0.33219	-0.986241
14627	b0490	predicted transporter subunit: ATP-binding component of ABC superfamily (NCBI)	-0.297856	1.52163	1.65833	1.72484	0.553393	0.989907	1.49416	1.41583	1.56839	1.59497	1.54435	1.67762	1.60697	1.60328	1.54856	1.31173	1.63472	1.61997	1.63759	1.67306	1.55452	1.72149	1.57638	1.21875	1.38524	1.4729	1.23651	0.965948	1.61642	1.63996	1.53912	1.58086	1.58719	1.43337	1.02348	1.5929	0.94073	0.985989	0.329919	0.532913	1.70071	1.44106	1.42901	1.35084	1.79207	1.44139	0.55557
14628	b0491	putative metal resistance protein (VIMSS)	0.256101	1.74813	1.81443	1.83142	0.913794	1.30178	2.03345	2.21039	2.12911	2.17517	2.8455	2.18971	2.21583	2.1156	2.0178	1.91454	2.23116	2.2171	2.23269	2.27472	2.15523	2.26267	2.17176	1.94465	1.88213	1.91446	1.42841	1.33497	2.0501	2.07754	1.97627	2.03219	1.87654	1.80697	1.27414	1.54309	0.795515	1.90273	0.208222	0.203406	1.86892	1.7973	1.76678	1.79317	1.53843	2.18697	0.921627
14629	b0492	putative thioredoxin-like protein (VIMSS)	0.285485	-0.534878	-0.349873	-0.614669	-0.614992	-0.925722	-0.64075	-0.78401	-0.601562	-0.313498	-0.625277	-0.0948133	-0.611033	-0.698657	-0.797164	-0.0722521	-0.58501	-0.600569	-0.58052	-0.552716	-0.613142	-0.676229	-0.642302	-0.960099	-0.838864	-0.716784	-0.256584	-0.952106	-0.572217	-0.555215	-0.507034	-0.600057	-0.606122	-0.720414	0.0130012	-0.808391	-0.87576	-0.461905	0.320652	-0.289661	-0.615673	-0.623321	-0.598456	-0.587931	-0.63216	-0.170983	-0.0996131
14630	b0493	short chain dehydrogenase (NCBI)	0.132615	0.121799	-0.475953	-0.760511	-0.95846	0.443662	-0.484679	-0.646482	-0.453797	-0.466157	-0.477321	-0.490263	-0.483516	-0.379331	-0.669993	-0.889477	-0.458818	-0.474928	-0.453272	-0.430889	-0.547431	-0.553784	-0.514904	-0.675695	0.170175	-0.487852	-1.16039	-1.10401	-0.343275	-0.326286	-0.426395	-0.381297	-0.566638	-0.0893709	-0.237634	-1.09533	-0.238358	-0.160607	0.747558	-0.127302	-0.454499	-0.462042	-0.436593	-0.304563	-0.0384848	-0.201107	-0.127855
14631	b0494	multifunctional acyl-CoA thioesterase I and protease I and lysophospholipase L1 (NCBI)	-0.127236	-1.41639	-1.39148	-0.698145	-0.204382	-0.243697	-1.72373	-1.20367	-1.70232	-1.72544	-0.992596	-1.75262	-1.7458	-1.27472	-1.07826	-2.15233	-1.72167	-1.73804	-1.71561	-1.6957	-1.8119	-1.81942	-0.92507	-2.14391	-1.16713	-2.00669	-2.0158	-2.90267	-1.86181	-1.8467	-1.9466	-1.90163	-2.08675	-1.4392	-1.62774	-0.143394	-3.20347	-1.17091	-1.26615	-0.362418	-2.19237	-2.19837	-0.998128	-0.918476	-1.62615	-1.89171	-0.615051
14632	b0495	predicted transporter subunit: ATP-binding component of ABC superfamily (NCBI)	0.0615898	0.248064	0.0135296	-0.229925	0.601242	-0.433986	0.450579	0.323346	0.499351	0.503269	0.475585	0.492304	0.498292	0.410844	0.803281	0.383038	0.530082	0.508782	0.528724	0.559324	0.690123	0.432479	0.467192	0.105138	0.495218	0.187944	-0.367218	-0.420358	0.332193	0.351522	0.251152	0.296391	0.417488	-0.0333543	-0.120947	0.580801	0.325744	0.175349	0.28205	-0.345182	-0.0434439	-0.0560239	1.81816	-0.143625	-0.60293	-0.262022	-1.78031
14633	b0496	predicted inner membrane protein (NCBI)	0.0412509	0.0927864	0.332503	0.423395	0.404654	0.147255	-0.0212569	-0.0461032	0.0190312	0.015317	0.211636	-0.00145479	0.00460095	-0.00326537	-0.0703907	0.721029	0.0357826	0.0142161	0.212582	0.0629939	0.102367	0.0631371	0.183447	0.0360765	0.369185	0.14941	0.419432	-0.301918	0.131642	0.150551	0.0502263	0.200853	0.289749	0.936769	0.937894	-0.237276	0.429879	0.302328	0.540395	0.217908	0.0724727	-0.0221693	0.109837	0.262468	0.526932	0.136008	0.0748521
14634	b0497	rhsD element protein (NCBI)	0.0640986	0.422909	0.303454	0.438895	0.789721	0.550044	0.326418	0.243862	0.373549	0.435427	0.349814	0.452452	0.524386	0.838007	0.612028	1.17663	0.401571	0.380221	0.432397	0.43043	0.520829	0.765029	0.740843	0.926259	0.913825	0.254524	0.435612	0.63995	0.392066	0.448076	0.317401	0.469905	0.744886	0.699213	0.807513	0.631399	0.273006	0.124376	0.266654	0.0323351	0.411665	0.451331	0.545662	0.468871	0.351157	0.341346	-0.0232208
14636	b0499	conserved protein, rhs-like (RefSeq)	0.165387	4.0959	4.10844	3.83815	2.85275	3.40248	3.71547	3.86208	3.89812	4.03491	3.862	4.12285	4.10675	4.03763	3.94198	3.82047	4.16974	4.15185	4.13734	4.24108	4.14143	4.11982	4.12453	3.80642	3.63893	3.99405	3.42384	3.16007	4.15093	4.1819	4.09335	4.14054	3.9527	3.84233	3.15656	3.01365	2.46173	3.4931	1.51052	0.110137	4.16204	4.01178	3.87833	3.9118	3.35188	4.20897	1.85975
14640	b0503	tRNA 2-selenouridine synthase, selenophosphate-dependent (NCBI)	0.0978789	0.624668	0.533787	0.104233	-0.320173	-0.359061	0.239698	0.122696	0.288727	0.306162	0.21838	0.297569	0.265195	0.285809	0.115711	0.730645	0.300004	0.305282	0.302869	0.341583	0.215667	0.801051	0.27493	0.575417	-0.218877	0.63518	-0.370733	0.557954	0.319545	0.336789	0.241803	0.291253	0.104165	-0.0568581	0.940286	-0.119512	-0.910951	0.270169	-0.438967	0.221954	0.334485	0.242513	0.235134	0.172263	-0.0850726	0.243809	-1.6597
14641	b0504	DNA-binding transcriptional activator of the allD operon (NCBI)	-0.466063	-0.851417	-0.826449	-0.460991	-0.855107	-1.6145	-0.345047	-0.515278	-0.323208	-0.331697	-0.393008	-0.360785	-0.392913	-0.454569	-0.543016	-0.781208	-0.360466	-0.35615	-0.355723	-0.326233	0.437253	-0.43686	-0.383391	-0.102189	-0.584919	-0.153781	0.574338	-0.575096	0.00881184	0.0225623	0.183779	-0.0226423	0.258642	0.198281	0.016588	-0.217747	0.130326	-0.723482	-0.470899	0.644414	-0.929636	-0.96818	-0.133244	-0.356629	-1.60754	-0.596138	2.02551
14642	b0505	ureidoglycolate hydrolase (NCBI)	0.107689	-0.501019	-0.477313	-0.715299	-0.958809	-0.418655	-0.596811	-0.757147	-0.570016	-0.573364	-0.643974	-0.601463	-0.635189	-0.692117	-0.782077	-1.06258	-0.597408	-0.592891	-0.593057	-0.561637	-0.688759	-0.0426072	-0.639425	-1.00164	-0.451423	-0.626778	-1.28071	0.275497	-0.464038	-0.450233	-0.544835	-0.495527	-0.681922	-0.173632	0.027796	-0.545577	-0.118376	0.811328	-0.644363	0.568601	-0.465469	-0.50542	-0.485279	0.118683	0.0615792	-0.894143	-1.64851
14643	b0506	DNA-binding transcriptional repressor (NCBI)	-0.375127	0.430614	0.452707	0.212619	-0.383271	-0.0198565	0.505456	0.404447	0.572203	0.587349	0.497211	0.573697	0.539996	0.483515	0.393823	0.109177	0.576531	0.582158	0.575734	0.619958	0.4791	0.481152	0.535273	0.177401	0.347742	0.474446	-0.127695	0.346838	0.642444	0.650949	0.563325	0.804254	0.644468	0.567202	-0.054376	0.0173322	0.379908	0.358457	-0.710133	-0.0828128	0.512416	0.471313	0.822537	0.399455	0.527091	0.772799	2.0556
14644	b0507	glyoxylate carboligase (NCBI)	0.0958339	-0.100617	0.0667524	0.127234	-0.528565	0.0495265	0.0217455	-0.136597	-0.167672	-0.174835	1.61602	-0.162927	-0.013129	-0.0886019	-0.1846	-0.112398	-0.0372511	-0.155434	-0.159238	-0.124209	-0.121658	0.0145906	-0.140693	-0.0583855	-0.316489	-0.183243	-0.0286956	-0.17125	-0.112679	-0.103664	-0.175294	-0.107382	-0.0256884	-0.0811294	0.132418	0.169933	0.10353	-0.141311	-0.261388	0.227058	-0.249968	-0.0241297	0.132575	-0.146458	-0.286124	-0.187946	-0.397083
14645	b0508	hydroxypyruvate isomerase (NCBI)	0.408743	3.39881	3.25015	2.99577	1.60364	2.56436	2.70295	2.75343	2.84716	2.934	2.7723	2.97646	2.94209	2.88744	2.79884	2.54501	2.98445	2.9927	2.97854	3.04789	2.90318	2.90771	2.93888	2.70494	2.45013	2.54552	2.4727	2.14395	2.70547	2.72462	2.63581	2.67898	2.77884	2.62276	2.08156	2.38364	1.92592	2.53081	1.34356	0.124407	3.05794	3.02409	2.93789	2.94919	2.67083	3.22569	1.45756
14646	b0509	tartronate semialdehyde reductase, NADH-dependent (NCBI)	-0.142616	1.13188	1.26562	0.908968	-0.255974	0.726442	1.10469	1.01911	1.16906	1.20047	1.09857	1.1996	1.17483	1.29169	1.28923	1.57414	1.21469	1.21204	1.2081	1.26366	1.10985	1.29219	1.16194	1.24181	1.1451	1.19774	0.924687	0.576714	1.08251	1.10105	1.00592	1.15028	0.992963	0.9068	0.396557	0.572411	0.470932	0.648177	1.06948	-0.416805	1.02676	1.08972	0.97722	0.929339	0.572083	1.30585	-0.432808
14648	b0511	putative transport protein (VIMSS)	0.0425506	2.39631	2.45521	2.34437	1.368	1.75737	2.36388	2.47122	2.46596	2.53801	2.45168	2.65686	2.59287	2.52254	2.51322	2.42567	2.61022	2.58692	2.58331	2.67669	2.53022	2.49505	2.58539	2.42365	2.45316	2.30369	1.94101	1.59679	2.35558	2.37786	2.27834	2.36608	2.15722	2.24457	1.70839	1.86673	1.55784	2.04774	0.422745	-0.186332	2.46859	3.19354	2.3993	2.41488	1.90596	2.49965	1.56547
14649	b0512	allantoinase (NCBI)	0.193795	-0.361097	-0.134804	-0.102034	0.375093	0.0955743	-0.260693	-0.0374653	-0.226674	-0.215681	-0.276401	-0.23267	-0.20265	-0.318713	-0.045967	0.0257707	-0.194128	-0.208501	-0.216853	-0.16098	-0.319878	0.0818891	-0.0859071	0.22107	-0.1462	0.0014098	-0.0821213	0.015131	-0.188344	-0.176833	-0.273394	-0.153555	-0.168501	-0.216451	-0.539628	0.105405	0.0202036	-0.463852	0.294865	0.0141813	-0.516736	-0.435041	0.0376398	-0.613166	-0.426936	-0.433373	0.00827008
14650	b0513	putative transport (VIMSS)	0.108554	0.152827	0.209004	0.541292	0.373398	0.154583	0.297903	0.149572	0.259658	0.320893	0.272421	0.292055	0.299684	0.219881	0.488671	0.473683	0.287571	0.273058	0.26511	0.319615	0.197077	0.288847	0.296758	0.325625	0.510115	0.141712	0.2548	0.270126	0.223586	0.235656	0.139034	0.322838	0.0884035	0.303874	0.379383	0.787022	0.451054	0.35601	-0.215069	0.000413108	0.176998	0.39959	0.24922	0.0953143	0.363304	0.165464	0.568506
14651	b0514	glycerate kinase II (NCBI)	-0.103209	-0.254369	-0.159096	-0.371654	0.0521305	-0.358403	-0.314644	-0.123596	-0.431051	-0.421207	-0.480778	-0.219545	-0.255399	-0.0785666	-0.233932	0.615402	-0.402288	-0.416743	-0.424855	-0.388769	-0.42289	-0.260945	-0.211597	-0.250303	0.390782	-0.492502	-0.212593	1.17799	-0.340535	-0.32774	-0.424445	-0.0997653	-0.2387	0.495795	0.320593	-0.29067	0.387031	-0.553593	-0.0373071	-0.0833559	-0.137372	-0.446943	-0.407752	-0.313894	0.187024	-0.385267	-0.293766
14652	b0515	hypothetical protein (NCBI)	0.046716	1.13635	1.13724	1.44736	0.940363	0.887646	1.11291	1.28965	1.1697	1.23744	1.35031	1.19819	2.37198	1.18495	1.28913	1.52071	1.23801	1.22431	1.21396	1.25728	1.15628	1.21873	1.46292	1.38123	1.37816	1.00457	0.91343	0.917297	1.06175	1.07655	0.979622	1.03301	0.978751	1.08828	0.915755	0.888164	0.959718	1.11395	0.00873864	-0.544186	1.30593	1.30141	1.13904	1.08027	0.92575	1.1587	0.444879
14653	b0516	N-carbamoyl-L-amino acid amidohydrolase (NCBI)	-0.00537789	0.426312	0.267275	0.454776	0.488503	0.446277	0.254347	0.220063	0.449755	0.324476	0.250978	0.329995	0.539989	0.566301	0.62818	0.78214	0.355505	0.341577	0.33191	0.379837	0.441722	0.460981	0.680163	0.429612	0.65273	0.449413	0.470224	0.209184	0.332066	0.341296	0.310727	0.522821	0.477938	0.731951	0.642939	0.285102	0.166138	0.166185	0.127601	0.0611396	0.504169	0.260142	0.286057	0.247671	0.104207	0.364364	0.112315
14654	b0517	ureidoglycolate dehydrogenase (NCBI)	0.0419198	0.360337	0.417557	0.76268	0.841246	0.454249	0.501342	0.393714	0.546047	0.566797	0.610154	0.66239	0.544955	0.605412	0.749964	1.11618	0.59433	0.58023	0.571064	0.610538	0.591447	0.615138	0.664533	0.818997	0.755773	0.506841	0.657807	0.447067	0.508167	1.79894	0.477941	0.763275	0.795405	0.737019	0.584777	0.347467	0.715116	0.527505	0.0771809	0.0414074	0.603301	0.752849	0.380537	0.320494	0.970365	0.631915	0.274514
14655	b0518	membrane protein FdrA (NCBI)	0.0455089	-0.0948413	-0.0641337	0.51018	-0.12834	-0.0476446	0.236478	0.39051	0.269308	0.278609	0.21968	0.257872	0.24768	0.312401	0.641471	0.00488997	0.296008	0.281472	0.273593	0.308877	0.290753	0.272608	0.332219	0.42891	0.293237	0.263912	1.47787	-0.0151971	0.170271	0.176709	0.09089	0.136088	0.344133	0.391138	-0.147242	-0.553328	-0.0869943	-0.4902	-0.179237	0.0319365	0.198154	0.0606249	-0.0250616	-0.0198426	0.0890362	0.484855	-0.257113
14657	b0520	hypothetical protein (NCBI)	-0.255336	0.620283	0.636731	0.783116	0.327515	0.637659	0.890833	0.998171	0.949315	0.972061	0.912232	0.951861	1.10342	0.880886	0.962165	1.41484	0.996892	1.00514	0.994896	1.02596	1.06475	0.901575	0.927409	0.573081	0.659861	0.662418	0.884822	0.385662	0.788403	0.811044	0.717617	0.76585	0.916542	0.627805	0.299514	0.508566	-0.405645	0.334159	0.968633	-0.0424847	0.975987	0.875453	0.771391	0.856343	0.864662	0.726705	0.02775
14658	b0521	predicted carbamate kinase (NCBI)	0.213339	1.10789	0.722391	0.680236	0.714061	0.124323	-0.0293001	0.637295	0.00939438	0.0139905	-0.0274288	-0.0203208	-0.0317003	-0.0915445	0.516468	-0.411414	0.0233877	0.0309809	0.0226766	0.0474349	0.467441	-0.0765382	-0.0449416	-0.402697	-0.532573	0.560294	-0.608215	-0.232654	0.182171	0.199884	0.107018	0.65072	0.413063	-0.183834	0.343246	-0.681411	-0.303576	-0.135894	0.211081	-0.29943	0.816071	0.316586	0.306784	0.226973	0.583916	0.122232	-0.221715
14659	b0522	phosphoribosylaminoimidazole carboxylase (NCBI)	-0.0065787	0.458702	0.207186	0.7025	0.123964	0.318774	0.625711	0.515363	0.678192	0.695534	0.641189	0.768672	0.756288	0.961645	1.06596	0.566217	0.716914	0.723941	0.714252	0.743513	0.725632	0.619247	0.762873	0.53443	0.5009	0.665397	0.246559	-0.0387314	0.568605	0.586627	0.493727	0.563607	0.466319	0.860101	0.461756	0.483769	0.213518	0.128136	0.0826948	-0.30847	0.447908	0.339563	0.353138	0.347245	0.444438	0.383962	-0.28892
14660	b0523	phosphoribosylaminoimidazole carboxylase catalytic subunit (NCBI)	0.262891	0.607227	0.190956	0.403906	0.830029	1.12983	0.891764	0.00192602	0.169943	0.177976	0.142296	0.151292	0.137753	0.0775435	-0.00784224	-0.240349	0.196106	0.174433	0.167	0.200832	0.0640916	0.0899344	0.10945	-0.229941	0.108761	-0.396895	1.15719	-0.168985	-0.266552	-0.262112	-0.347707	-0.302608	-0.486682	0.125812	0.790833	0.583148	0.0637976	-0.673778	0.0104102	-1.03257	-0.206693	-0.245815	-0.217202	-0.322551	0.0464667	-0.192149	1.57826
14664	b0527	conserved inner membrane protein (NCBI)	0.236121	-1.05398	-1.03792	-0.0312421	-1.09161	0.478873	-0.990732	-0.454243	-0.977518	-0.978749	-1.00506	-1.01204	-1.02551	-1.08597	-1.1715	-0.823998	-0.439887	-0.989743	-0.996308	-0.965257	-1.10163	-1.07007	-1.05403	-0.531122	-1.53319	-1.17611	-1.21838	-0.803488	-1.04562	-1.04166	-1.1272	-1.08218	-1.2663	-0.77121	-0.26386	-1.50504	-2.21493	-1.60841	0.164455	-1.1305	-0.698314	-1.18214	-0.569351	-0.81523	0.376355	-0.98916	1.20185
14667	b0530	putative fimbrial-like protein (VIMSS)	0.211974	3.41701	3.41494	3.16629	2.20246	2.6636	3.12088	3.20829	3.27387	3.38532	3.23082	3.43452	3.41995	3.36637	3.69131	3.16399	3.48827	3.49882	3.47874	3.54185	3.3802	3.4159	3.39402	3.2701	3.18768	3.17095	3.39733	2.59708	3.29832	3.32042	3.23286	3.2793	3.0933	3.08909	2.29521	2.14989	1.54288	2.58385	1.70393	-0.233196	3.08338	3.02487	2.94826	2.9794	2.44806	3.29196	1.47686
14668	b0531	pilin chaperone, periplasmic (NCBI)	-0.236698	2.73935	2.62707	2.69962	1.51937	2.56658	2.71292	2.73637	2.83456	2.91432	2.79193	2.93649	2.92225	2.86782	3.17095	2.84192	2.98759	2.99681	2.98064	3.03088	2.87132	3.08908	2.89563	2.66238	2.61483	2.39855	2.26537	2.07767	2.51767	2.5411	2.45734	2.4971	2.31103	2.23344	1.67107	1.61715	1.24716	2.2114	0.954782	0.602996	2.80251	2.6478	2.59435	2.62719	2.07124	2.89947	0.620319
14669	b0532	predicted outer membrane export usher protein (NCBI)	0.197647	1.80063	1.72828	1.76381	1.25378	1.32	1.72151	1.80983	1.86718	1.85105	1.74597	1.90921	1.88471	1.9249	1.88544	2.05482	1.90958	1.88965	1.87709	1.9276	1.88757	1.9589	1.86659	1.66884	1.84383	1.83536	1.68489	1.84925	1.78267	1.80817	1.71266	1.82625	1.63193	1.71172	1.60681	0.951466	0.661257	1.36348	0.637764	0.284962	1.64891	1.60617	1.5677	1.49369	1.24961	1.65248	0.442646
14670	b0533	predicted fimbrial-like adhesin protein (RefSeq)	-0.0613035	3.1074	3.19747	2.9619	2.00557	2.47445	2.84428	2.92374	2.96107	3.04949	2.89003	3.08386	3.04954	3.12204	2.96015	3.10344	3.13145	3.10858	3.09236	3.1532	2.98914	3.05214	3.01503	2.86438	2.62726	3.26457	2.71835	2.82161	3.3492	3.37689	3.28857	3.33081	3.25468	3.13401	2.74391	2.58565	1.97225	3.05766	1.47981	-0.354736	3.52478	3.29976	3.21685	3.24454	2.98369	3.18561	1.09918
14671	b0534	predicted fimbrial-like adhesin protein (NCBI)	0.104076	1.46795	1.56154	1.17208	0.579674	0.883679	1.63085	1.60567	1.7212	1.78097	1.6569	1.78445	1.74668	1.70299	1.62994	1.64977	1.80353	1.79911	1.78807	1.834	1.71203	1.87276	1.90459	1.79249	1.57721	1.5674	1.42672	1.81445	1.69305	1.71834	1.63563	1.67608	1.59667	1.45204	1.32007	0.700213	0.74749	1.43678	0.799679	-0.52107	1.533	1.48226	1.48352	1.52772	1.20384	1.7212	0.753954
14672	b0535	predicted DNA-binding transcriptional regulator (NCBI)	0.356577	3.58725	3.50894	3.32915	2.42637	2.7488	3.45736	3.61307	3.63957	3.78472	3.57443	3.8553	3.81673	3.78179	4.02262	3.37488	3.88017	3.87888	3.85858	3.93459	3.80869	3.83222	3.78199	3.48983	3.34445	3.24727	2.63964	2.58733	3.37187	3.40904	3.325	3.36648	3.19636	3.01088	2.36527	2.09479	1.68081	2.72759	1.35744	-0.0638711	3.20895	3.15479	3.08721	3.09473	2.81864	3.05443	0.754099
14673	b0537	DLP12 prophage; predicted integrase (NCBI)	-0.063113	-0.421194	-0.307093	-0.0345837	0.279923	0.00115034	-0.289115	-0.303416	-0.259764	-0.226516	-0.303894	-0.270434	-0.297047	-0.0294591	-0.361593	0.0573869	-0.247834	-0.246484	-0.253133	-0.218024	-0.301254	-0.166911	-0.0271223	0.0197002	-0.362811	-0.41062	0.103968	-0.0707381	-0.279014	-0.18512	-0.18871	-0.251361	-0.195566	-0.324477	0.4527	-0.481025	0.0698115	-0.215183	-0.785613	-0.0731467	-0.0626879	-0.338764	-0.394581	-0.193008	-0.535018	0.0338339	-0.264487
14674	b4508	putative sensory transduction regulator (VIMSS)	0.0367937	-1.01257	-1.61096	-1.07734	-1.61455	-1.55211	-1.36863	-1.50607	-1.36649	-1.35013	-1.39952	-1.39553	-1.43961	-1.46156	-1.54324	-1.73468	-1.39487	-1.40169	-1.40578	-1.38112	-1.48288	-1.46757	-1.4498	-1.12757	0.114119	-1.60829	-2.08367	0.54535	-1.48662	-1.484	-1.56952	-1.51414	-0.632682	-1.77005	-0.351439	-2.29394	-2.32118	-1.81899	-0.711914	-0.40773	-1.49835	-1.54497	-1.50687	-0.701705	-0.717012	-0.263064	-0.367235
14675	b0539	DLP12 prophage; predicted exonuclease (RefSeq)	0.243151	-0.365788	-1.09339	-0.279844	-0.331459	0.0287618	-0.91887	-0.32955	-0.890803	-0.88793	-0.954255	-0.928359	-0.97251	-0.362986	-1.10436	-0.615448	-0.913379	-0.919833	-0.924866	-0.898405	-1.02748	-0.387104	-1.00387	0.0507066	-0.300696	-1.03182	-0.823299	-0.248535	-0.89631	-0.879604	-0.961368	-0.921477	-0.699177	-1.02304	0.264909	-0.188721	-1.34186	-0.532018	0.302357	0.519973	-0.985942	-0.711463	-0.975256	-1.10392	-0.559707	-0.81211	-1.87069
14678	b0542	orf, hypothetical protein (VIMSS)	0.394127	1.77351	1.76189	2.31155	1.88356	0.967937	2.13758	2.12048	2.2094	2.29596	2.16856	2.29959	2.25492	2.21317	2.12559	1.84574	2.31851	2.31411	2.30301	2.34907	2.21721	2.22441	2.22492	1.91406	1.75449	2.00911	1.3655	1.10666	2.153	2.16802	2.08113	2.12268	1.95121	1.76751	2.0711	0.840918	0.383724	1.62037	0.260111	-0.65868	1.65037	1.59778	1.59633	1.51036	1.00438	2.29198	4.83065e-05
14679	b0543	multidrug efflux protein (NCBI)	0.139515	0.340843	0.163998	0.396923	1.15272	0.528491	0.12262	0.104854	0.127356	0.0892897	0.00431678	0.420862	0.217999	0.401886	0.859846	1.21616	0.105177	0.0796302	0.0713221	0.14455	0.387607	0.672561	0.903572	1.37092	1.24342	0.704943	1.81155	1.21157	0.259433	0.276088	0.181577	0.414284	0.607435	0.712106	0.873818	0.226673	-0.0257512	-0.19056	-0.0126053	0.203792	1.02018	0.991238	1.08669	1.4502	1.69067	1.50633	0.122397
14681	b0545	DLP12 prophage; predicted kinase inhibitor (NCBI)	-0.0677549	2.03645	2.03892	2.0882	1.80466	1.44652	2.118	2.20431	2.20377	2.42643	2.19016	2.32062	2.27579	2.50056	2.41872	2.12761	2.34088	2.33707	2.32423	2.37599	2.24293	2.38998	2.59863	2.49286	2.44702	2.1255	2.08084	1.98595	2.26053	2.27783	2.19068	2.28843	3.13698	2.03898	1.54904	1.57127	1.83268	1.60549	0.545046	-0.438336	2.10496	2.25886	1.99562	2.55592	2.05871	2.14975	0.568826
14682	b0546	DLP12 prophage; predicted DNA-binding transcriptional regulator (NCBI)	0.294674	2.88387	2.86643	2.73618	1.69607	2.18946	2.41335	2.4132	2.50321	2.59027	2.44263	2.61135	2.57045	2.52745	2.42118	2.4468	2.6581	2.63476	2.61993	2.67631	2.5327	2.56409	2.68512	2.36485	2.20683	2.53604	2.25124	2.12016	2.57185	2.59851	2.50289	2.55275	2.46156	2.20252	1.98389	2.08461	1.65813	2.28071	0.836783	-0.213893	2.72237	2.67408	2.61629	2.59515	2.08318	2.38078	0.409956
14683	b0547	DLP12 prophage; predicted protein (NCBI)	0.0951942	-0.0479045	-0.0507672	0.150376	0.876741	-0.601526	-0.0321912	-0.152777	-0.0143138	0.0246194	-0.0546454	-0.00760382	-0.0518614	0.336187	0.244477	1.59348	0.00825373	0.00221489	-0.00404573	0.0263826	-0.105024	0.102676	-0.0867673	0.162682	-0.563351	-0.0683349	0.895806	0.246359	0.0770519	0.0838197	-0.00215685	0.038713	-0.132005	-0.314342	-0.267147	-0.708668	0.613384	-0.460791	0.857809	-0.00775488	0.00891688	-0.0308913	0.00117372	-0.109302	-0.317939	-0.300605	-1.39719
14684	b0548	DLP12 prophage; conserved protein (NCBI)	-0.13385	-0.459092	-0.461751	-0.671764	0.144212	0.483232	-0.709591	-0.850922	-0.698037	-0.664464	-0.738833	-0.700623	0.214756	-0.794819	-0.878165	0.0166434	-0.685074	-0.69129	-0.697025	-0.668289	-0.79951	-0.796465	-0.795347	-0.457451	-1.2626	-0.388823	0.492419	-1.29	-0.243329	-0.236984	-0.322914	-0.282096	-0.45282	0.630096	-1.27013	-0.815872	0.0441554	-1.20559	0.0778965	0.187588	-0.756215	-0.0647768	-0.736238	-0.856283	-1.37471	0.204668	-1.02979
14685	b0549	DLP12 prophage; predicted protein (NCBI)	-0.391768	-0.432182	-0.434226	0.109504	0.327354	-0.364949	-0.501232	-0.612203	-0.485352	-0.456913	-0.518951	-0.493173	-0.537355	0.605258	-0.641874	-0.830988	-0.491777	-0.498175	-0.503502	-0.474845	-0.578693	-0.565275	-0.566301	-0.791845	0.16194	-0.498776	-0.342478	-1.17991	-0.377708	-0.372495	-0.458298	-0.402629	-0.534873	-0.658719	0.693179	-0.961782	-1.07318	0.0601779	-0.780904	0.214077	-0.18862	-0.226917	-0.195745	-0.269835	-0.143887	-0.329083	-2.10427
14686	b0550	DLP12 prophage; endonuclease RUS (NCBI)	0.0713909	2.02974	1.08957	1.63399	0.102056	1.34547	1.1509	1.04461	1.18701	1.22382	1.12321	1.20539	1.16497	1.11553	1.02751	1.91208	1.24839	1.2232	1.21384	1.25248	1.11177	1.11799	1.12371	0.811767	0.65128	1.2924	1.23435	1.24872	1.42087	1.44052	1.34568	1.39505	1.2197	1.51514	0.487098	0.430299	0.895096	1.07288	-0.903847	0.348979	1.46494	1.41486	1.42252	1.34739	0.82758	1.62239	0.114118
14687	b0551	DLP12 prophage; predicted antitermination protein (NCBI)	-0.0382908	-0.118034	-0.318542	-0.121373	0.317635	0.0164569	-0.283912	-0.190082	-0.164719	-0.223599	-0.0591836	-0.254018	-0.298299	-0.0566205	-0.0435055	0.888413	-0.237927	-0.243874	-0.250404	-0.219087	-0.201665	0.0364636	0.183447	0.695003	0.542109	0.0713633	0.638794	0.383152	-0.0981621	-0.0787817	-0.160844	-0.0981471	-1.77048e-06	0.342503	-0.059622	-0.154865	-0.0897719	-0.581779	-0.100259	0.0536697	-0.275766	-0.258548	-0.286029	-0.409666	0.272806	-0.176523	-0.974084
14689	b0553	DLP12 prophage; truncated outer membrane porin (pseudogene) (RefSeq)	-0.00413147	-0.439401	-0.593212	-0.495893	0.314813	-0.483909	-0.657342	-0.745396	-0.641126	-0.608224	-0.685732	-0.611633	-0.584615	-0.399928	-0.0421285	0.0794485	-0.639954	-0.638903	-0.601569	-0.612428	-0.663499	-0.0723572	-0.0831319	0.173425	0.28235	-0.212948	0.19842	0.170365	-0.699557	-0.679713	-0.760816	-0.571284	-0.551341	-0.562535	0.137629	-1.0856	0.061225	-0.574114	-0.906876	0.399904	-0.579944	-0.659496	-0.302867	0.0395586	-0.147598	-0.488968	0.189954
14690	b0554	DLP12 prophage; predicted phage lysis protein (NCBI)	0.024094	-0.587401	-0.446854	0.329032	1.00905	0.451392	-0.427851	-0.320038	-0.41289	-0.376336	-0.458756	-0.410201	-0.37233	0.104846	0.301507	0.689877	-0.394486	-0.400596	-0.406646	-0.37689	-0.403138	-0.371567	-0.131237	0.688225	0.602913	-0.220513	0.936713	0.64084	-0.636574	-0.617858	-0.699847	-0.541599	0.289332	0.0514934	0.481415	-0.433211	-0.263137	-0.694698	-0.088904	-0.0659277	0.941262	-0.253819	-0.757055	-0.700431	-0.800914	-0.568144	-0.309837
14691	b0555	DLP12 prophage; predicted lysozyme (NCBI)	0.0475862	1.33611	1.41076	1.1707	0.983206	0.940397	1.40909	1.43251	1.46504	1.53835	1.4187	1.53247	1.4879	1.45455	1.36606	1.64454	1.5507	1.54588	1.53602	1.57809	1.51864	1.43924	1.70722	1.23733	1.69303	1.47744	1.53961	1.40012	1.59113	1.67298	1.53521	1.59828	1.57454	1.54155	1.23696	0.90124	0.65157	1.21602	0.316131	0.0923766	1.54564	1.30754	2.54989	1.42722	1.14133	2.04035	0.1146
14692	b0556	DLP12 prophage; predicted murein endopeptidase (NCBI)	-0.155713	1.39859	1.19604	0.982925	1.54743	1.41511	1.42429	1.36986	1.49158	1.55881	1.42679	1.56516	1.44432	1.96165	1.33529	1.75546	1.6106	1.5866	1.57374	1.62376	1.36689	1.48836	1.46823	1.15606	1.34959	1.3177	1.06499	1.06778	1.21985	1.23587	1.14926	1.19867	0.989587	1.63925	0.959932	0.269599	-0.101821	0.901431	0.0241762	-0.476584	1.11781	1.07606	1.09345	1.00518	0.516662	0.699242	0.590398
14693	b0557	DLP12 prophage; predicted lipoprotein (NCBI)	0.119846	1.31465	1.30212	1.26206	1.46887	1.32433	1.22287	1.14381	1.27745	1.33353	1.21267	1.33149	1.29086	1.34229	1.60067	2.01331	1.37633	1.35194	1.34022	1.38659	1.49641	1.67933	1.23421	1.46729	1.3994	1.94899	2.00526	1.93163	1.58394	1.59925	1.51273	1.56213	1.40478	1.27951	1.27841	0.89705	0.250678	1.19046	0.456936	-0.610423	1.1683	1.16466	1.19043	0.961534	1.13545	1.32317	0.665074
14695	b0559	DLP12 prophage; predicted protein (NCBI)	0.32414	2.64199	2.6159	2.33602	1.58657	2.24442	2.43965	2.43761	2.53396	2.62589	2.46882	2.65147	2.61051	2.55567	2.47353	2.51476	2.69871	2.67561	2.74927	2.71877	2.57471	2.65159	2.66752	2.6138	2.56081	2.85065	2.52957	2.04141	2.9765	3.00174	2.91411	2.9643	2.88862	2.65121	2.01217	2.02813	1.6522	2.47607	1.19842	-0.253334	2.95495	2.77249	2.72824	2.8309	2.22204	2.70502	1.2165
14696	b0560	DLP12 prophage; DNA packaging protein (NCBI)	0.128292	1.06329	0.695618	1.20742	1.54798	1.57515	0.669697	0.531033	0.703812	0.729118	0.629811	0.692843	0.659211	0.943602	0.513025	1.04159	0.742126	0.720643	0.712645	0.748296	0.606405	0.625503	0.610987	0.29685	0.45063	0.330613	0.0903998	1.74438	0.456337	0.457831	0.391795	0.429996	0.543846	0.0660108	0.928314	-0.506404	0.524532	0.0415556	-0.537379	0.653925	0.481989	0.437715	0.491379	0.362142	-0.104157	1.39419	0.699014
14697	b0561	orf, hypothetical protein (VIMSS)	0.244633	-0.0278848	-0.0342459	0.296295	0.727921	0.214148	-0.104456	0.0496319	-0.0453741	0.0193754	-0.110469	0.0273939	-0.0105166	1.2315	-0.158387	0.909178	0.0770662	0.0534827	0.0394321	0.0938769	0.0328264	0.251664	0.13672	0.920922	1.74485	0.965989	0.904981	1.29648	-0.0800036	-0.068383	-0.148154	-0.099064	1.04896	-0.22937	0.647398	-0.0440931	-0.321601	-0.429126	-0.6628	-0.259229	0.0267673	-0.0172295	0.449861	0.156866	-0.333704	-0.306422	-0.41077
14698	b0562	orf, hypothetical protein (VIMSS)	0.136595	1.95462	1.8593	1.8981	1.48254	1.53675	1.80665	1.76845	1.87366	1.9362	1.90496	1.93495	1.93582	1.93729	1.78724	2.03683	1.98278	1.95853	1.9464	1.99401	1.87979	1.9566	1.99654	1.94784	1.777	2.02063	1.70113	1.961	2.03839	2.05243	1.99318	2.02199	1.97899	1.75977	1.74074	1.34403	1.18956	1.77699	0.466081	0.0713362	2.06269	2.00965	2.00853	1.96896	1.6178	1.81846	0.356636
14699	b0563	DLP12 prophage; predicted protein (RefSeq)	-0.156575	1.65736	1.81832	1.61938	1.44749	1.26272	1.63909	1.65662	1.69343	1.76459	1.64713	1.73891	1.71204	1.70095	1.61664	2.007	1.77457	1.76963	1.7601	1.80088	1.66815	1.75644	1.86271	2.3147	1.49865	1.82885	2.21304	2.14284	1.88939	1.89128	1.833	1.87438	1.81111	1.78083	1.04272	1.4554	0.601055	1.4672	-0.291782	0.627049	1.8386	1.79146	1.81268	1.87384	1.50519	1.40337	0.0251307
14701	b0565	DLP12 prophage; outer membrane protease VII (outer membrane protein 3b) (NCBI)	0.0242151	0.175156	0.199062	0.111251	0.958555	0.22375	0.0936785	0.118064	0.179853	0.220528	0.0813009	0.120425	0.192072	0.39458	0.1476	0.456387	0.16166	0.163367	0.155669	0.178457	0.391228	0.352486	0.574257	0.82918	0.881515	0.286621	0.98211	1.15312	0.291026	0.291996	0.23272	0.424984	0.687248	0.502672	0.448175	-0.26897	-0.523966	0.360268	0.105976	-0.111842	0.222343	0.170729	0.241831	0.210047	0.0710998	0.230696	-0.166468
14702	b0566	DNA-binding transcriptional activator of porin biosynthesis (NCBI)	-0.250033	0.450627	0.474653	0.341731	0.1994	0.31449	0.690377	0.885545	0.747123	0.791398	0.946541	0.779165	0.737983	0.698414	0.613758	0.492759	0.813318	0.822219	0.80976	0.82692	0.796056	0.77248	0.805228	0.71353	0.531634	1.05079	1.3062	0.856209	0.879076	0.887208	0.833407	0.858204	0.814305	0.899012	0.823214	0.336051	0.0702746	0.296264	-0.233944	0.187667	0.737452	0.596572	0.597947	0.511888	0.378242	0.633033	-1.07871
14703	b0567	hypothetical protein (NCBI)	-0.0950959	-1.45971	-1.2098	-1.59591	-0.384446	-0.154834	-1.50292	-0.899273	-1.48922	-1.43197	-0.853027	-1.37107	-1.5332	-0.735001	-1.65554	-0.922517	-1.45038	-1.4487	-1.45631	-1.22239	-1.46248	-0.808914	-1.56408	-0.75671	-0.928594	-0.858835	-0.70322	-0.789537	-1.56097	-1.55926	-1.59926	-1.57385	-1.75397	-0.626768	-1.26803	0.872229	-0.544292	-0.745412	-0.0035094	0.391326	-0.89947	-0.57227	-0.668785	-0.590795	-0.407147	-1.54243	-0.164559
14704	b0568	bacteriophage N4 receptor, outer membrane subunit (NCBI)	0.00271263	-0.620226	-0.760246	-0.359203	-0.294819	-0.601787	-0.207677	4.48159	-0.348072	-0.643625	-0.156478	-0.199496	-0.434076	-0.857942	-0.528194	-0.0336404	-0.802979	-0.663239	-0.619513	-0.627814	-0.606973	-0.437411	-0.732806	-0.591038	-0.412449	-0.439585	-0.495449	-0.0571085	-0.695427	-0.779989	-0.415303	-0.444632	-0.476975	-0.319634	0.0474266	2.22651	-0.340683	0.157082	-0.278196	0.657469	14.1063	13.9465	13.354	13.9117	13.4098	2.1003	3.1501
14705	b0569	bacteriophage N4 receptor, inner membrane subunit (NCBI)	0.0427752	-0.135362	-0.0400605	-0.306887	-0.0968132	0.0108866	0.258588	4.63102	0.102643	-0.00216242	0.0543172	0.202164	0.293596	0.0929158	-0.0525598	-0.203227	-0.0181739	-0.024195	-0.0305071	-0.000112605	-0.0571132	0.14758	0.0999984	-0.312867	-0.322672	-0.0431648	-0.187427	-0.0613281	-0.0622767	0.0149217	-0.0163666	0.0271162	-0.112526	-0.140758	0.137649	0.67863	-0.220933	-0.100572	-0.367487	0.768226	14.1147	13.9745	13.4032	13.9907	13.4663	2.33548	3.07365
14706	b0570	sensory histidine kinase in two-component regulatory system with CusR, senses copper ions (NCBI)	-0.0101891	-1.03037	-0.950478	-0.907147	-0.282877	-1.43255	-0.764074	-0.916037	-0.769918	-0.727973	-0.802881	-0.803136	-0.811737	-0.8705	-0.701842	-0.517887	-0.752401	-0.758777	-0.76404	-0.50177	-0.867704	-0.767452	-0.867366	-0.823701	-0.629456	-0.814168	-0.929757	-0.318575	-0.81815	-0.818483	-0.858253	-0.676664	-0.720966	-0.812239	-0.993563	-0.237592	-0.250739	-0.225209	0.0719193	0.0422599	-0.589817	-0.450828	-0.783012	-0.910134	1.92947	-0.838713	0.545209
14707	b0571	DNA-binding response regulator in two-component regulatory system with CusS (NCBI)	-0.0639846	-0.55222	-0.658749	-0.440091	-0.497664	-0.825112	-0.480469	-0.527684	-0.487389	-0.444153	-0.52707	-0.496195	-0.51589	-0.572648	-0.462005	-0.630247	-0.433577	-0.459347	-0.466995	-0.433871	-0.261327	-0.272787	-0.483079	-0.533078	-0.0655374	-0.707273	-0.372259	-0.519136	-0.573318	-0.574627	-0.321988	-0.586483	-0.762151	-0.719335	-0.933182	-0.322702	0.59855	-0.67447	-0.424904	-0.193321	-0.419055	-0.426434	-0.436452	-0.506271	-0.0658532	-0.329214	-0.276761
14708	b0572	copper/silver efflux system, outer membrane component (NCBI)	-0.120577	0.485086	0.487827	0.749452	0.604428	0.142687	0.577494	0.884142	0.588872	0.684829	0.548214	0.730308	0.700776	0.644445	0.545618	0.693154	0.683025	0.662013	0.652632	0.692808	0.656923	0.545853	0.672922	0.671377	0.346118	0.602186	0.869448	0.499589	0.534206	0.570418	0.571512	0.772956	0.381815	0.498607	0.300503	0.270346	0.382777	0.875105	0.435896	-0.239993	0.645084	0.566069	0.518834	0.487651	0.552567	0.469009	0.0334406
14709	b0573	periplasmic copper-binding protein (NCBI)	-0.0507375	0.984136	0.886221	0.893685	0.788826	0.447782	0.823826	0.630882	0.758787	0.899827	1.06203	0.783345	0.763481	0.783901	0.614882	0.909158	0.8875	0.822175	0.812574	0.852012	0.710834	0.779466	0.701394	0.749346	0.36817	1.00695	1.00035	0.973616	0.9841	0.986791	0.933609	0.974761	0.995691	0.706573	0.726602	1.26227	0.199946	0.696593	0.492331	0.182301	0.934382	1.6131	0.952284	0.844304	0.866948	0.932368	0.179179
14710	b0574	copper/silver efflux system, membrane fusion protein (NCBI)	0.198654	0.280324	0.408866	0.187689	0.0706756	0.572511	0.278714	0.171292	0.295891	0.358915	0.399222	0.300013	0.420712	0.299411	0.230092	0.300009	0.352298	0.346675	0.339186	0.445163	0.241522	0.360993	0.227893	0.247435	-0.0711783	0.240858	0.074472	0.196804	0.272781	0.310013	0.258191	0.274614	0.111249	0.312646	-0.104981	0.108666	-0.266764	-0.0490298	0.478249	-0.307025	0.194042	0.189266	0.118541	0.280207	0.622889	0.14205	0.980525
14711	b0575	copper/silver efflux system, membrane component (NCBI)	-0.0635682	-0.326959	-0.496227	0.122073	0.279888	-0.159928	-0.367627	-0.459842	-0.356864	-0.298818	0.886998	-0.360988	-0.369747	-0.402003	-0.222176	-0.10138	-0.308916	-0.314674	-0.32176	-0.288819	-0.4235	-0.13288	-0.416088	-0.0852003	-0.15337	-0.358678	0.147434	-0.127883	-0.498685	-0.497106	-0.54328	-0.403825	-0.585881	-0.320511	-0.195775	-0.353616	0.246808	-0.121736	-0.497282	0.373042	-0.111371	-0.11207	-0.138184	0.0186055	0.341192	-0.256164	-0.226266
14712	b0576	phenylalanine transporter (NCBI)	-0.02139	0.274821	0.208956	-0.264722	-0.218814	-0.714604	0.127289	0.0223778	-0.0287148	0.0327192	0.413018	-0.0252886	-0.066809	0.104617	-0.0826909	-0.110283	0.0159474	0.0176416	0.00997901	0.0213842	-0.0957988	-0.106371	-0.115693	-0.411437	-0.1923	0.0306409	-0.377467	-0.45359	0.0173451	0.0212037	-0.0257828	0.0078555	-0.174731	-0.144598	-0.195127	-0.153186	-0.0134756	0.450959	0.480905	0.0413401	-0.0442541	-0.0907108	-0.0710892	-0.181524	0.0374831	0.151036	0.334394
14713	b0577	predicted mechanosensitive channel (NCBI)	-0.0755517	0.048882	0.131686	0.121781	-0.203108	-0.00515289	0.243111	0.164951	0.242254	0.375086	0.329923	0.237261	0.229988	0.247761	0.143141	0.188438	0.331218	0.280139	0.272464	0.283886	0.198018	0.269913	0.245402	0.0696989	-0.108152	0.144284	0.173094	-0.0538555	0.220725	0.22428	0.177329	0.264095	0.0917508	0.192829	-0.117437	0.0556125	0.161114	0.126761	0.0046302	0.135796	0.123392	0.162499	0.076183	0.327358	0.833756	0.0977444	0.333878
14714	b0578	dihydropteridine reductase, NAD(P)H-dependent, oxygen-insensitive (NCBI)	0.0744542	-0.451118	-0.158195	-0.653464	-0.832185	-0.633958	-0.347506	-0.273922	-0.340683	-0.294638	-0.375507	-0.365297	-0.406662	-0.243621	-0.529116	-0.697152	-0.325407	-0.324321	-0.330192	-0.324637	-0.255294	-0.402399	-0.455661	-0.575003	-0.669686	-0.487637	-0.258537	-0.0751148	-0.355553	-0.354464	-0.401138	-0.367597	-0.549577	-0.225642	0.236547	0.21561	-0.37566	-0.0459565	0.229022	-0.446569	-0.304577	-0.572256	-0.536148	-0.337405	0.278146	-0.164607	-1.26654
14715	b0579	hypothetical protein (NCBI)	0.0294416	-1.46459	-1.42682	-1.66481	-0.672168	-0.871791	-1.57135	-1.7353	-1.57693	-1.5416	-1.61166	-1.62021	-1.66148	-1.70191	-1.78443	-2.09892	-1.58098	-1.58025	-1.58506	-1.58294	-1.69852	-1.70995	-1.71076	-2.01124	-1.22379	-1.64094	-0.0646671	-0.962195	-1.5085	-1.51004	-1.55642	-1.52304	0.0271017	-0.867289	-1.1937	-2.79397	1.10175	-2.27331	-2.34988	-1.9469	-1.80433	-1.84763	-1.79839	-1.94123	-0.446893	-1.83389	0.0203788
14716	b0580	predicted inner membrane protein (NCBI)	-0.146179	0.621938	0.655762	0.413654	0.223153	-0.147288	0.67301	0.57239	0.705594	0.759789	0.660709	0.720461	0.693747	0.628673	0.540151	0.230436	0.754923	0.749366	0.74168	0.776499	0.64173	0.623927	0.616128	0.582925	0.180319	1.38295	0.749823	0.712311	1.5123	1.52068	1.47156	1.61993	1.32178	1.28115	0.690628	1.00609	-0.221776	0.47512	0.142452	0.241944	0.941173	0.898122	0.900141	0.80306	0.380441	1.22132	-0.881972
14717	b0581	gamma-glutamyl:cysteine ligase (NCBI)	0.0983063	-0.335679	-0.272885	-0.214355	0.352098	0.371874	-0.384686	-0.288571	-0.395024	-0.357714	-0.435781	-0.393085	-0.440219	-0.1555	-0.594527	-0.292817	-0.351487	-0.377444	-0.384538	-0.353223	-0.301188	-0.230115	-0.316589	-0.190955	-0.429244	-0.0763925	0.258372	0.395397	-0.222938	-0.221483	-0.269828	-0.235927	0.106874	-0.596828	-0.154608	-0.620979	-0.461935	0.0343685	0.0575271	-0.297737	0.0494205	-0.278319	0.0418388	-0.286893	-0.315922	0.0895097	0.349869
14719	b0583	phosphopantetheinyltransferase component of enterobactin synthase multienzyme complex (NCBI)	0.0151152	-1.14004	-1.0851	-0.401531	-1.36404	-0.676407	-0.810063	-0.969347	-0.808138	-0.78142	0.561008	-0.841541	-0.900732	-0.941009	-1.02256	-0.697934	-0.809013	-0.806319	-0.820391	-0.794671	-0.401272	-0.922239	-0.931686	-0.726461	-0.18301	-1.1586	-0.941882	-0.972018	-1.0304	-1.03205	-1.08249	-1.04497	-1.23243	-1.40541	-2.05727	-1.05849	-2.33907	-0.861926	0.0810315	-0.12594	-1.35697	-1.40023	-1.35091	-1.52212	-0.434066	-1.28254	-0.748331
14720	b0584	iron-enterobactin outer membrane transporter (NCBI)	-0.00681179	-0.834451	-0.776163	-1.10444	-0.373651	-0.616067	-0.738823	-0.654622	-0.728577	-0.464266	-0.768138	-0.747733	-0.806999	-0.455756	-0.532098	1.30407	-0.714548	-0.711558	-0.726502	-0.670611	-0.572293	-0.458459	-0.744314	-0.46931	-0.567928	-0.471068	0.0708039	-0.878526	2.05518	-0.671542	-0.722204	-0.624521	-0.58187	-0.309475	-0.39232	-0.163792	-0.140474	-0.848354	0.195405	-0.102852	-0.633807	-0.408115	0.726706	-0.716224	-0.432294	-0.957684	-0.351971
14721	b0585	enterobactin/ferric enterobactin esterase (NCBI)	-0.191423	0.918413	1.05168	0.787241	0.54965	0.164696	1.00045	1.02951	1.03632	1.09324	0.996485	1.05584	0.996385	0.956771	0.87563	0.560936	1.09046	1.09419	1.07705	1.11268	1.10033	0.984486	0.965968	0.757074	0.56598	0.760534	0.318345	0.352377	0.887996	0.89127	0.84028	0.878119	0.777465	0.918749	0.719409	0.275007	-0.138281	0.661353	-0.688693	-0.0892161	1.22369	1.01561	0.975906	0.99207	1.24092	0.892858	-0.492638
14722	b0586	enterobactin synthase multienzyme complex component, ATP-dependent (NCBI)	0.0776077	-0.748863	-0.760154	-0.522789	-0.903204	-0.720575	-0.656904	-0.655711	-0.639478	-0.631426	-0.666569	-0.568217	-0.727569	-0.522798	-0.756477	-0.727513	-0.632272	-0.625109	-0.660619	-0.630488	-0.734625	-0.636317	-0.523801	-0.932786	-0.747808	-0.664941	-0.631774	-0.765161	-0.586245	-0.58592	-0.634139	-0.422403	-0.293313	-0.534992	-0.682572	-0.179454	0.108333	-0.475738	-0.188964	-0.205753	-0.413305	-0.532541	-0.727368	-0.49747	-0.461498	-0.534695	-0.113052
14723	b0587	regulator of length of O-antigen component of lipopolysaccharide chains (NCBI)	-0.0687838	1.99116	1.99726	1.70218	0.864706	1.36089	1.67371	1.80681	1.7535	1.92217	1.72558	1.81305	1.76545	1.70798	1.7058	1.31662	1.86532	1.87451	1.83302	1.88251	1.72801	1.73514	1.71087	1.3665	1.25588	1.86689	1.23139	1.10944	1.99541	2.01039	1.96052	1.99524	1.80995	1.62882	1.14227	0.963493	1.5499	1.53245	0.0330952	0.76516	1.79634	1.74752	1.70468	1.78991	1.43645	1.80729	1.19766
14724	b0588	iron-enterobactin transporter subunit (NCBI)	-0.129088	0.202846	0.0651084	-0.120802	0.252593	-0.371563	-0.0220386	0.0651142	0.0101529	0.13564	-0.01713	-0.00756214	-0.054768	0.300089	-0.196937	0.188438	0.041573	0.0491971	0.0123244	0.0468596	0.171529	-0.0612927	-0.110157	0.0228279	-0.474477	0.0354139	-0.263965	-0.133184	0.126112	0.128239	0.0798199	0.113819	-0.0693648	-0.182527	0.0455023	0.625172	0.0559534	-0.0802457	-0.210548	0.126681	-0.0409011	0.167545	-0.114241	0.276692	0.816466	0.0838053	0.180522
14725	b0589	iron-enterobactin transporter subunit (NCBI)	0.0175709	0.216471	0.200259	0.526355	-0.185814	0.24024	0.119744	-0.0112649	0.152561	0.174399	0.0785153	0.135766	0.0885562	0.0300753	0.211684	-0.362375	0.18495	0.192591	0.155669	0.19036	0.0382038	0.0439005	0.0331523	-0.120907	-0.0363166	-0.00397649	-0.507659	-0.453552	0.0883685	0.090246	0.0369256	0.0746107	-0.0547033	0.108959	0.111971	0.984749	-0.341838	-0.22294	-0.525542	-0.382721	0.0651157	0.0303556	0.238197	0.1204	0.48479	0.0613601	-0.903469
14726	b0590	iron-enterobactin transporter subunit (NCBI)	-0.200117	0.237869	0.345006	0.00852378	0.370007	0.473627	0.356711	0.24259	0.382541	0.431332	0.341605	0.384073	0.324698	0.292139	0.332226	0.661738	0.447067	0.432574	0.413235	0.584291	0.676775	0.551253	0.520399	0.757974	1.05928	0.328301	-0.173075	-0.633441	0.227932	0.230245	0.176133	0.242331	0.0852965	0.892902	0.623517	-0.285291	0.483532	-0.0573321	-0.0349204	-0.165245	0.39319	0.495563	0.669108	0.423791	0.726509	0.302815	-1.33426
14727	b0591	predicted transporter (NCBI)	0.34391	0.32382	0.178134	-0.112387	0.43738	0.312308	-0.0749513	0.164456	-0.0510878	-0.00327147	-0.0920619	-0.0507801	0.397633	0.165226	0.0112797	0.603731	0.0122787	-0.00221166	-0.0215538	0.0136088	0.323027	0.230234	0.34591	0.653408	0.326575	-0.0398842	1.19055	-0.131312	0.0878638	0.0906432	0.0364775	0.148253	0.210425	1.07727	0.813196	0.314194	0.14947	0.490546	0.0974942	0.232233	0.258736	0.0985153	0.120293	0.116541	0.939973	0.0430586	-0.974042
14728	b0592	iron-enterobactin transporter subunit (NCBI)	-0.118	-0.0409665	0.0191743	-0.140537	0.368791	-0.213541	0.397661	0.55388	0.430621	0.478005	0.44034	0.417092	0.491095	0.335829	0.34222	0.246226	0.469014	0.472454	0.4522	0.489024	0.345352	0.455368	0.360195	0.166535	0.336309	0.131953	-0.195739	-0.124437	0.259605	0.263154	0.195661	0.253307	0.451709	0.338356	-0.22551	0.0117459	-0.0869326	0.298715	-0.572891	-0.141743	0.677898	0.294834	0.312515	0.230859	0.426573	0.645549	0.834474
14729	b0593	isochorismate synthase (NCBI)	0.0713727	-0.68617	-0.968718	-0.362856	0.428739	0.203315	-0.854508	-0.758604	-0.839238	-0.806993	-0.885672	-0.690771	-0.711937	-0.960584	-0.582357	-0.22437	-0.827993	-0.825051	-0.843829	-0.811754	-0.763926	-0.423506	-0.145411	-0.473532	-0.718166	-1.06318	-0.294205	0.379308	-0.935047	-0.935056	-1.00215	-0.782485	0.0329098	-0.121792	-0.172175	0.186084	0.145323	-0.503191	-0.587088	0.097583	-0.223002	-0.904792	-0.868347	-0.104804	0.279989	-0.42611	-0.501071
14730	b0594	2,3-dihydroxybenzoate-AMP ligase component of enterobactin synthase multienzyme complex (NCBI)	-0.125352	-0.599759	-0.532119	-0.549874	0.168579	-0.725889	-0.427063	-0.336633	-0.405711	-0.366897	-0.218457	-0.421528	-0.480817	0.0921042	-0.602396	0.188438	-0.208829	-0.374011	-0.392364	-0.360414	-0.514151	-0.238735	-0.3618	-0.366385	-0.377179	-0.394594	-0.502847	-0.329355	-0.276806	-0.276303	-0.332699	-0.199756	-0.438216	-0.371488	-0.243503	-0.761323	0.156644	-0.200789	-0.0783463	-0.0768536	-0.269706	-0.504882	-0.471101	-0.45192	0.214952	-0.550914	0.134387
14731	b0595	isochorismatase (NCBI)	-0.257288	-0.460639	-0.389888	-0.634424	-0.4936	-0.262353	-0.428052	-0.546292	-0.23493	-0.359297	-0.439967	-0.430112	-0.476113	-0.0954047	-0.593988	-0.546612	-0.379054	-0.376066	-0.394982	-0.362482	-0.50784	-0.514701	-0.516746	-0.227911	-0.932534	-0.398281	-0.557814	-0.719647	-0.270389	-0.0696796	-0.336725	-0.331767	-0.48072	-0.402771	-0.692719	-0.824779	1.07705	0.0669162	-0.335459	-0.116972	-0.266904	-0.371526	-0.443514	-0.367879	-0.178844	-0.17764	-0.400175
14732	b0596	2,3-dihydroxybenzoate-2,3-dehydrogenase (NCBI)	0.19267	-0.128628	0.17065	-0.14216	-0.871199	-0.718415	-0.240955	-0.363354	-0.215464	-0.172797	-0.256335	-0.224421	-0.283746	-0.31648	-0.405206	-0.0549227	-0.161785	-0.17647	-0.195238	-0.161945	-0.315918	-0.300497	-0.31456	-0.630227	-0.303622	-0.362917	-0.0709399	-0.437422	-0.245187	-0.243324	-0.299871	-0.0843234	-0.103324	-0.62163	-0.575257	-0.747429	-0.381976	-0.0696482	-0.688331	-0.169507	-0.0509524	-0.234885	-0.203759	-0.355092	0.704302	-0.194868	-0.715748
14733	b0597	hypothetical protein (NCBI)	-0.220157	0.0519514	-0.195577	-0.490085	-0.554457	0.0179603	-0.0332113	0.394978	-0.00760931	0.0346349	-0.0484406	-0.0176279	-0.0769436	-0.109635	-0.198355	-0.0629698	0.0448922	0.030169	0.0115114	0.0444307	-0.109407	-0.0939991	-0.107711	-0.0524385	-0.532481	-0.251581	-0.916342	-0.904981	-0.133812	-0.13365	-0.190008	-0.191442	-0.336871	-0.510309	-0.247947	0.914633	-1.0598	-0.459329	-0.738182	-0.0221558	0.60893	-0.046754	-0.015299	0.0998243	-0.271078	-0.381649	0.118996
14734	b0598	carbon starvation protein (NCBI)	0.104362	-0.412317	-0.212366	-0.276201	-0.0308197	0.157969	-0.18991	-0.257675	-0.166446	-0.0801835	-0.132945	0.0152065	-0.0859702	0.173715	0.017297	0.0771657	-0.117103	-0.131882	-0.150375	-0.117982	0.070229	-0.100113	-0.182112	-0.132153	0.0801448	0.250507	-0.148152	-0.0955274	-0.0829056	-0.0812112	-0.13774	-0.0553919	-0.100452	0.125812	0.701719	0.199612	-0.190035	0.18694	0.00268348	-0.0452117	-0.0424074	-0.108648	-0.139172	-0.0954061	0.0645114	-0.15152	0.25203
14736	b0599	predicted oxidoreductase (NCBI)	0.0528271	-0.459269	-0.626138	-0.730558	0.375699	-0.800626	-0.499498	-0.623176	-0.475135	-0.432441	-0.516015	-0.483154	-0.317077	-0.202845	-0.17446	0.369181	-0.420354	-0.43497	-0.453937	-0.419926	-0.236052	-0.558605	-0.573322	-0.345877	-0.451084	-0.450586	-0.489996	-0.397498	-0.566171	-0.56538	-0.621809	-0.623303	-0.361687	-0.163278	0.199018	-0.0300136	0.000510158	-0.757861	-0.147499	0.24331	0.032793	-0.502599	-0.476523	-0.621862	-0.283885	-0.359966	-0.0170291
14737	b0600	putative aminotransferase (NCBI)	-0.0568218	-0.367745	-0.300615	-0.305483	0.3258	-0.00855489	-0.193483	-0.319921	0.64526	-0.129288	-0.210666	-0.18277	-0.242072	-0.157801	-0.363555	-0.0887426	-0.120353	-0.135131	-0.165522	-0.121227	-0.274995	-0.259641	-0.0448389	-0.288724	-0.370085	-0.0645214	-0.616507	-0.924283	-0.0932096	-0.0925011	-0.148919	-0.150333	-0.124834	-0.170581	-0.295288	-0.77851	-0.830309	-0.253576	-0.245842	0.174477	0.0152023	-0.0836151	-0.24898	-0.0669702	-0.456013	-0.0503098	-0.126848
14738	b0601	hypothetical protein (NCBI)	0.00490293	-0.520038	-0.541987	-0.573754	-0.538165	-0.52412	-0.340646	-0.144845	-0.0286857	-0.286561	-0.370811	-0.333955	-0.381062	-0.439742	-0.523587	-0.808916	-0.289116	-0.278386	-0.325444	-0.291672	-0.434763	-0.375052	-0.349397	-0.696478	-0.699056	-0.146417	-0.503326	-0.267534	-0.224337	-0.225889	-0.297435	-0.096606	-0.211333	-0.238749	-0.394149	-0.388598	0.325744	-0.749135	0.604629	-0.463794	-0.547419	-0.560963	-0.517055	-0.455018	-0.720504	-0.532117	-0.462923
14739	b0602	hypothetical protein (NCBI)	0.048319	0.630748	0.549292	1.00507	-0.0819451	0.315902	0.966087	0.533863	0.692554	0.733649	0.618167	0.710516	0.630397	0.60498	0.678382	0.9983	0.757761	0.769631	0.719209	0.763913	0.618867	0.898384	0.607969	0.699814	0.444347	0.463578	0.175884	1.00282	0.591996	0.59418	0.712474	0.559985	0.569615	0.578798	0.921633	0.918925	0.194973	0.627032	0.587514	-0.357342	0.642834	0.625189	0.64577	0.544625	1.12689	0.651475	-0.130704
14741	b0604	thiol:disulfide interchange protein (VIMSS)	0.0777672	0.238093	0.237534	0.147223	0.180425	0.36089	0.239754	0.267386	0.277476	0.331156	0.236438	0.287906	0.223845	0.195986	0.344709	0.368455	0.661903	0.337021	0.305221	0.354086	0.199518	0.368873	0.19786	1.04238	0.297295	0.531079	-0.338744	0.41764	0.375434	0.37986	0.323027	0.79058	0.18143	0.730239	0.0905963	0.0205245	0.5434	0.48499	-0.438715	-0.0302498	0.369192	0.572919	0.420844	0.257415	-0.0388715	0.386274	-0.205183
14742	b0605	alkyl hydroperoxide reductase, C22 subunit (NCBI)	-0.241866	1.29793	1.35853	1.00891	0.430349	0.940927	1.14468	1.37228	1.19241	1.25402	1.15136	1.21619	1.15207	1.12455	1.3412	1.36247	1.27996	1.26589	1.2334	1.28447	1.12977	1.40489	1.13443	0.814513	0.725714	1.54889	0.70698	1.05209	1.48208	1.48771	1.43075	1.42971	1.29321	1.10908	0.459801	0.456335	1.77375	1.01681	-0.466543	0.445694	1.65153	1.98991	1.45142	1.34784	1.57865	1.0246	-1.20172
14743	b0606	alkyl hydroperoxide reductase, F52a subunit; detoxification of hydroperoxides (VIMSS)	0.0492065	-0.0446117	-0.153487	0.0245923	-0.193105	0.241806	-0.178609	-0.28715	-0.137864	-0.100261	-0.185563	-0.129098	-0.213626	-0.234833	-0.33043	-0.548409	-0.0872282	-0.101983	-0.132441	-0.0879286	-0.241716	0.0683279	-0.231737	-0.317411	-0.112524	0.0424358	0.00809588	-0.264159	0.0631577	0.0645732	0.00807639	0.00670166	0.0658994	0.123324	-0.492651	0.284531	-0.546526	-0.355682	0.107978	0.291271	-0.0861788	-0.0914495	-0.312607	-0.436038	-0.501662	1.04746	-0.272908
14744	b0607	universal stress protein UP12 (NCBI)	0.152154	1.04758	1.01719	0.74735	0.515758	0.392032	0.885966	1.04503	0.956261	1.02156	0.908163	1.0147	0.929908	1.08231	0.814148	0.911972	1.05866	1.04494	1.01143	1.0659	0.979025	0.930786	1.05124	0.742996	1.06361	0.758195	0.28609	0.369503	0.866214	0.872512	0.81547	0.967319	0.79234	0.796878	0.229953	0.614243	-0.27604	0.32878	-0.629348	0.00455559	0.751938	0.599978	0.616845	0.682015	0.0962792	0.998086	0.152905
14745	b0608	predicted oxidoreductase, Zn-dependent and NAD(P)-binding (NCBI)	-0.082529	-0.847649	2.62965	-0.596915	-0.202203	-0.486385	-0.37556	-0.573966	-0.644327	-0.613745	-0.690695	-0.648846	-0.294683	-0.75467	-0.850376	0.0942729	-0.619057	-0.566346	-0.652219	-0.610461	-0.766083	-0.594955	-0.751539	-0.722722	-0.642189	-0.726087	0.526168	-0.758984	-0.610723	-0.610864	-0.677945	-0.67306	-0.487627	-0.71871	-0.451718	-0.540378	-0.826441	-0.968946	-1.14432	-0.274896	-0.835524	-0.309673	-0.844657	-0.93285	-0.676948	-0.635565	-0.389876
14747	b0610	nucleoside diphosphate kinase regulator (NCBI)	0.0170295	-1.31895	-1.24301	-1.50279	-0.0898193	-1.84388	-1.10625	-1.22081	-1.08133	-1.09777	-1.12054	-1.12609	-1.18986	-1.18984	-1.27877	-1.49849	-1.10773	-1.10533	-1.12785	-1.09409	-1.21174	-1.18033	-1.19498	-1.4506	-0.652768	-0.93917	-1.43406	0.265759	-0.856294	-0.851348	-0.929453	-0.909365	-0.997572	-0.335918	-0.764163	-2.03027	-2.01562	-1.60037	0.790328	0.092456	-1.29637	-1.3204	-1.30964	-0.564094	-0.765055	-1.29088	-1.31497
14748	b0611	ribonuclease I (NCBI)	0.0745494	-0.379058	-0.305881	-0.647391	-0.0647181	0.476862	0.205512	0.124265	0.258883	0.2774	0.212131	0.272277	0.208203	0.187211	0.0917808	-0.21853	0.306845	0.310501	0.284404	0.328518	0.182007	0.464213	0.305527	0.410873	0.489762	-0.102588	0.0869353	-0.979613	0.00405031	0.0141741	-0.0645088	-0.0589736	-0.0355884	-0.360913	-1.00977	0.458005	-1.04555	0.375884	-0.257295	-1.43271	0.0864812	0.0567241	0.0334094	-0.0116028	1.29467	-0.193631	1.37832
14749	b0612	citrate:succinate antiporter (NCBI)	-0.00455248	-0.195217	-0.0365489	-0.467021	0.135469	-0.259225	0.0385805	0.130465	0.0722914	0.087412	0.234169	0.0686745	0.00754016	-0.0102131	0.139522	0.265955	0.0972997	0.202987	0.080407	0.0994595	0.206452	0.233266	0.33975	0.10182	-0.300492	0.0636638	-0.119929	-0.23888	0.170271	0.179603	0.099354	0.247274	-0.0304563	-0.217351	-0.330665	0.684957	0.539935	0.433187	-0.823028	-0.332588	0.30962	-0.0609985	-0.0684941	0.052658	-0.0228647	-0.202806	-0.0194883
14750	b0613	triphosphoribosyl-dephospho-CoA transferase (NCBI)	-0.0883296	0.0303035	0.0194351	-0.307615	-0.321954	-0.694473	0.127289	0.384123	0.538275	0.18621	0.905077	0.171252	0.110072	0.0924152	0.283603	0.448059	0.20024	0.201685	0.183004	0.203739	0.0733999	0.10268	0.0730408	-0.0154314	-0.340969	-0.094997	-0.16769	-0.590344	0.0117068	0.0204486	-0.0597334	-0.0582229	0.0291955	-0.105339	0.0841092	0.274776	-0.814757	-0.493055	-0.577692	0.213472	-0.0672481	-0.376627	-0.380649	-0.446685	-0.315314	0.542435	0.3319
14752	b0615	citrate lyase, citrate-ACP transferase (alpha) subunit (NCBI)	0.150669	-0.11296	-0.0605155	-0.396189	-0.997656	-0.0891431	0.486785	-0.38238	-0.246927	-0.231494	-0.281913	-0.249781	0.241911	-0.328749	-0.425262	-0.73975	-0.221046	-0.219751	-0.237989	-0.218681	0.345688	-0.319757	-0.348104	-0.141342	-0.119995	0.1823	0.103968	0.0389133	0.288854	0.298831	0.218511	0.220083	0.294645	-0.0985817	-0.734888	0.85032	0.11037	-0.599199	-0.4715	0.0434835	0.11923	-0.169866	-0.179478	-0.239371	0.138362	-0.122073	-0.947074
14753	b0616	citrate lyase beta chain (acyl lyase subunit) (VIMSS)	-0.238739	0.301371	-0.329813	0.169751	-0.432012	0.136174	-0.22015	0.0356498	-0.175225	-0.164163	-0.214978	-0.17482	-0.23883	-0.251209	-0.355515	-0.370253	-0.140756	-0.13735	-0.162706	-0.120974	-0.26711	-0.245263	-0.121341	-0.592868	0.0889542	0.482076	-0.614935	-1.04896	-0.0428095	-0.0341996	-0.114367	-0.112875	0.252651	0.494516	0.207246	0.373367	0.119351	-0.219137	0.710759	0.295205	-0.207046	-0.233714	-0.230097	0.0186065	-0.15509	-0.291141	-0.792337
14754	b0617	citrate lyase, acyl carrier (gamma) subunit (NCBI)	-0.69591	1.39629	1.46656	1.12091	-0.170442	0.889612	1.55649	2.13125	1.63366	1.70539	1.59371	1.70117	1.61636	1.60492	1.99981	1.18742	1.73363	1.73148	1.69771	1.75291	1.59544	1.61821	1.59107	1.74513	1.17304	1.46086	0.787306	0.541799	1.55749	1.57358	1.49423	1.49451	1.36206	1.17331	0.54001	0.496214	0.332329	1.77033	-0.829128	-1.83417	1.51859	1.48786	1.45228	1.4209	0.995855	1.58183	-0.638911
14755	b0618	citrate lyase synthetase (citrate (pro-3S)-lyase ligase (VIMSS)	-0.0369953	1.64242	1.71713	1.36004	0.533958	0.816197	1.64571	1.6593	1.72747	1.79559	1.69196	1.80682	1.73904	1.93622	1.6238	1.46998	1.84337	1.84808	1.81886	1.87305	1.92681	1.76134	1.85107	1.41286	1.37214	1.96855	1.13505	1.24922	1.77796	1.79527	1.7226	1.72206	1.58116	1.35773	1.00977	1.23944	0.914746	1.51313	0.81812	0.115812	1.86674	1.76104	1.68751	1.92688	1.41656	1.80872	0.878585
14756	b0619	sensory histidine kinase in two-component regulatory system with citB (NCBI)	-0.134197	1.4773	1.23535	0.912608	0.122493	1.05602	1.52775	1.5069	1.61019	1.66261	1.57546	1.67179	1.6101	1.58668	1.49989	1.3144	1.70291	1.70547	1.68351	1.71484	1.80589	1.66497	1.58917	1.54446	1.48884	1.45366	0.86331	0.67508	1.55021	1.56628	1.49375	1.49314	1.45011	1.30128	0.651483	0.825883	1.27685	1.62975	0.510116	0.386528	1.56722	1.56596	1.70982	1.50102	1.36453	1.53803	0.447574
14757	b0620	DNA-binding response regulator in two-component regulatory system with citA (NCBI)	0.0231742	-0.0768843	-0.111314	-0.276946	-0.269874	-0.242288	-0.116479	-0.170527	-0.0319835	-0.014871	-0.0743075	-0.0311662	0.0179392	0.051746	0.277493	0.446352	-0.00256511	-0.0077342	-0.0161296	0.00894255	-0.138623	0.0750586	-0.101671	-0.0123384	-0.195512	-0.225198	-0.370303	-0.157042	-0.126333	-0.113234	-0.177998	0.0244437	-0.336203	-0.0396458	0.292279	-0.0696438	0.253218	0.488047	0.229656	0.179521	-0.062336	-0.0654311	0.798195	-0.0753201	-0.42963	0.132415	0.0774179
14758	b0621	anaerobic C4-dicarboxylate transport (NCBI)	-0.0321212	0.505902	0.48611	0.329461	0.351241	0.0799513	0.564931	0.706791	0.668484	0.704444	0.625829	0.70391	0.69268	0.619955	0.682537	0.78072	0.734139	0.72974	0.719079	0.751596	0.60266	0.987531	0.610455	0.895492	0.618419	0.895796	0.225336	0.242226	0.855038	0.871676	0.806518	0.804014	0.881329	0.867702	0.637528	0.815803	-0.415552	1.10304	-0.529965	0.620751	0.47228	0.878961	0.452599	0.479175	-0.0382387	0.514719	-0.515844
14759	b0622	palmitoyl transferase for Lipid A (NCBI)	-0.0555574	1.24337	1.31111	0.989059	1.07021	0.643749	1.0173	1.01985	1.10668	1.16685	1.08189	1.16155	1.20551	1.17427	1.07362	0.893837	1.17961	1.18822	1.17805	1.20887	1.14196	1.05907	1.28609	0.974857	0.772628	1.16125	1.18877	0.956117	1.24646	1.26528	1.20705	1.20961	1.20454	1.17825	1.27102	0.307715	0.451411	0.899202	-0.159307	0.035261	1.22292	1.23181	1.19038	1.23782	2.20724	1.07177	-0.455341
14760	b0623	cold shock protein E (NCBI)	-0.688455	-0.324145	-0.244764	0.390229	-0.552201	0.0419563	-0.11217	-0.177979	-0.0617178	-0.0309241	-0.0700734	-0.0538569	-0.111058	-0.155159	-0.214304	-0.438714	-0.0567873	-0.0550597	-0.0615637	-0.0300677	-0.150068	-0.14062	-0.138825	-0.363659	-0.443248	0.0644316	0.560831	0.344578	0.12371	0.124564	0.0777364	0.0964422	-0.0498533	0.743428	-0.577081	-1.06199	-1.07444	-0.613819	1.65444	-3.08807	4.71758	-0.353926	-0.341329	-0.40032	-0.671071	0.156427	-1.54291
14761	b0624	camphor resistance protein CrcB (NCBI)	0.126125	-0.567903	-0.481127	-0.830408	-0.781364	-1.27345	-0.510543	-0.614914	-0.468676	-0.436673	-0.484146	-0.462519	-0.519714	-0.571891	-0.637881	-0.462429	-0.451603	-0.449833	-0.456334	-0.426089	-0.573204	-0.574241	-0.569078	0.617506	-0.984341	-0.415225	-1.069	-1.34202	-0.331232	-0.33153	-0.37823	-0.374495	-0.558879	0.200016	-0.795033	-0.252234	-1.29243	-0.299061	0.524068	-0.872709	-0.372145	0.0677095	-0.32768	-0.423396	0.52671	-0.430114	-1.97014
14764	b0627	twin arginine translocase protein E (NCBI)	-0.39826	2.63778	2.72433	2.37344	1.22797	1.91867	2.56349	2.62067	2.69383	2.79933	2.66535	2.82905	2.76793	2.70713	2.64207	2.84478	2.84489	2.84921	2.83519	2.88972	2.73361	2.74046	2.71266	2.42522	2.29939	2.51468	1.84739	1.85187	2.5963	2.60967	2.56145	2.56348	2.36222	3.01898	1.58017	0.599098	0.470134	1.59507	0.109373	-1.07808	1.53736	1.5729	1.55055	1.49158	1.08484	2.83229	0.622858
14766	b0629	putative transcriptional regulator LYSR-type (VIMSS)	0.0043203	0.444695	0.540897	0.826493	0.0886937	0.230043	0.378329	0.472686	0.610765	0.66917	0.515621	0.602018	0.492265	0.766034	0.696654	0.824088	0.522061	0.530498	0.520837	0.550029	0.400093	0.78654	0.459735	0.437089	0.591819	0.641269	0.754826	0.643042	0.665772	0.68213	0.624174	0.625977	0.54197	0.376206	0.668717	0.169862	-0.157223	0.36289	0.259931	0.251611	0.484615	0.488318	0.523248	0.353349	0.321311	0.621139	0.340421
14769	b0632	D-alanyl-D-alanine carboxypeptidase (penicillin-binding protein 5) (NCBI)	0.333331	1.68774	1.70856	1.41767	0.752463	1.33264	1.01909	1.03443	1.13546	1.18274	1.31387	1.20815	1.16787	1.11256	1.02005	1.00483	1.22151	1.21748	1.20572	1.24176	1.20574	1.43765	1.09301	0.925304	0.79266	1.34376	1.21689	1.12762	1.41994	1.43995	1.37441	1.37077	1.20699	1.02652	1.4358	1.15895	0.846713	1.84542	0.0189895	0.0211959	1.72491	1.81491	1.72797	1.67586	1.37529	1.04796	-0.291693
14770	b0633	minor lipoprotein (NCBI)	0.034797	-0.36349	-0.277711	-0.173133	-0.336757	-0.110767	-0.416616	-0.520524	-0.0842565	-0.334457	-0.39211	-0.366486	-0.307501	-0.212812	-0.267926	-0.691086	-0.348813	-0.341353	-0.348134	-0.328306	-0.309719	-0.351299	-0.225116	-0.536306	-0.401524	-0.202186	-0.023131	0.18666	-0.128772	-0.116738	-0.0224673	0.0776339	-0.138403	-0.431688	-0.337096	0.292182	-0.172881	0.0716803	-0.621825	0.26607	-0.0846474	-0.205437	-0.059699	-0.280565	0.00351145	-0.0636375	-0.566367
14773	b0636	hypothetical protein (NCBI)	-0.0473702	-0.0263199	-0.189777	0.0469629	-0.314869	-0.41232	-0.0130741	0.172883	0.0469253	0.325119	0.0172479	0.0514825	-0.00577482	-0.0715256	-0.137564	-0.126477	0.0694355	0.0770591	0.0697947	0.0911771	-0.0572165	0.346597	-0.0549336	-0.355886	-0.294617	-0.164002	-0.714296	-0.441788	-0.0905824	-0.0793877	-0.136766	-0.135159	-0.22086	-0.023341	-0.259294	-0.342863	-1.25657	-0.029972	-1.4576	0.3305	-0.339825	-0.0948862	-0.299274	-0.391111	0.38554	-0.172036	-0.217572
14775	b0638	predicted alpha-ribazole-5'-P phosphatase (NCBI)	-0.0443526	-0.168953	0.143131	-0.132844	-0.830152	-0.436216	-0.166497	-0.250554	-0.102173	-0.0645261	-0.132026	-0.0889777	-0.146284	-0.212096	0.140434	-0.388736	-0.070524	-0.0627084	-0.0705371	-0.0473131	0.322769	-0.139025	-0.195526	-0.427228	-0.392358	0.0842319	0.0585397	0.29028	0.157468	0.171231	0.113566	0.115229	-0.0175364	-0.250487	0.558928	0.184512	0.356396	-0.578486	0.562239	-0.34348	-0.0867414	0.251501	-0.148989	-0.228366	0.138397	-0.143379	-0.251316
14778	b0641	minor lipoprotein (NCBI)	0.161502	-1.02749	-0.947752	-0.352988	-2.05658	-1.51649	-0.828547	-0.924928	-0.760671	-0.767626	-0.800726	-0.806334	-0.849376	-0.133006	0.0678548	-0.461756	-0.78545	-0.791477	-0.797465	-0.778953	-0.898897	-0.89536	-0.875087	-1.12063	-1.19536	-0.919598	-1.42683	-0.801506	-0.857298	-0.84803	-0.912367	-0.902394	-0.0536588	-1.16994	-0.839903	0.0496646	-1.70381	-0.461704	0.0211966	-0.281618	-1.06115	-1.03725	-1.0123	-1.09373	-1.37416	-0.778806	-0.576375
14780	b0643	hypothetical protein (NCBI)	0.149029	-0.612084	-0.517928	0.420708	-0.122306	-0.202324	-0.668603	-0.776525	-0.616618	-0.590494	-0.646257	0.159104	0.00503311	0.373765	-0.468083	0.225738	-0.606373	-0.598977	-0.506634	-0.586356	-0.561136	-0.732517	-0.0142641	-0.346902	0.0347943	-0.629962	-0.150658	-0.840099	-0.556421	-0.545088	-0.599853	-0.600945	-0.754398	-0.386402	-0.548082	-0.141449	1.1397	0.157726	0.190188	-1.03334	-0.697572	-0.00678074	-0.653257	-0.737389	-0.496612	0.159191	0.413832
14781	b0644	orf, hypothetical protein (VIMSS)	-0.00115497	0.773114	0.882099	0.739537	0.16507	0.352647	0.670887	0.719702	0.768739	0.887268	0.721153	0.78234	0.81335	0.776531	0.615727	0.515205	0.819423	0.814652	0.805076	0.833959	0.694119	0.82138	0.849225	0.706238	0.737986	1.0948	0.880482	0.787592	1.16147	1.17913	1.11385	1.17365	1.03276	1.06271	0.593382	0.0631945	0.910063	0.945681	-0.141189	-0.116482	1.56374	0.881855	0.893769	0.912326	0.674297	0.806521	0.349722
14782	b0645	hypothetical protein (NCBI)	0.212213	2.99674	3.09543	2.8608	2.20968	2.34857	2.50028	2.54806	2.62195	2.71162	2.6873	2.7385	2.68859	2.70354	2.57024	2.26403	2.78468	2.78865	2.76251	2.80747	2.76847	2.75379	2.64937	2.3207	2.32712	2.91998	2.59124	2.26468	3.00064	3.02482	2.95138	2.94875	2.79871	2.64312	2.13438	1.68808	1.40678	2.24985	0.890378	-0.239424	2.6856	2.69216	2.6344	2.65253	2.25631	2.74109	0.657422
14783	b0646	predicted chaperone (NCBI)	0.0359684	0.859327	0.933497	0.861041	1.05458	0.549709	0.768992	0.737944	0.90471	0.867863	0.784101	0.911824	0.803491	0.85	0.721234	0.751859	0.882265	0.896936	0.876604	0.902711	0.887297	0.865903	0.855566	0.616432	0.6285	0.993743	0.763186	0.762041	0.981263	0.998011	0.932841	1.03002	0.865779	0.921609	0.640172	0.545085	0.232915	0.654446	-0.201069	-0.263758	1.54445	0.845835	1.52972	2.01652	0.427335	0.856163	-0.330888
14784	b0647	conserved outer membrane protein (NCBI)	-0.180546	2.96673	3.04164	2.75839	2.4923	2.35132	2.59263	2.63954	2.71437	2.8135	2.6852	2.85573	2.79726	2.86071	2.69395	2.70078	2.89027	2.90758	2.87932	2.94214	2.78058	2.86608	3.09039	2.46664	2.45128	2.90915	3.30803	4.12062	2.98769	3.0143	2.96397	2.94886	2.89502	2.74557	2.26046	2.1927	1.59474	2.60183	1.15942	-0.000339715	2.94602	2.90549	2.85544	2.88034	2.59158	2.81054	0.87287
14785	b0648	predicted tRNA ligase (NCBI)	-0.243464	2.7872	2.8309	2.44828	1.42373	2.29625	2.44358	2.48399	2.56726	2.68278	2.52716	2.69252	2.63251	2.60866	2.4033	2.23669	2.73135	2.73856	2.72165	2.77126	2.53286	2.6794	2.773	2.36376	2.42788	2.87446	2.03629	2.25347	2.95485	2.93976	2.89953	2.90649	2.71702	2.61041	1.81979	1.58232	1.57961	2.00585	0.366216	-0.380065	2.49494	2.44744	2.42868	2.39708	1.92528	2.76645	1.13167
14786	b0649	Hsc56 co-chaperone of HscC (NCBI)	-0.23736	0.760717	0.920823	0.594729	0.530379	0.23282	0.876193	0.800532	0.940462	1.00186	0.900502	0.969805	0.910367	0.885009	0.798566	0.682425	1.00501	1.01029	0.999083	1.02897	0.877416	0.939146	0.872142	0.608903	0.639501	1.07939	0.311198	0.391407	1.04815	1.06094	0.990427	0.996348	1.11225	0.956441	0.936774	0.169754	0.0698711	0.721723	-0.159015	-0.466137	1.20624	1.13913	1.1455	1.10848	0.861169	1.08444	0.538131
14787	b0650	Hsp70 family chaperone Hsc62, binds to RpoD and inhibits transcription (NCBI)	0.0230004	1.0162	1.11686	0.985714	0.517742	0.477913	1.26801	1.25336	1.30887	1.31997	1.8393	1.30903	1.23914	1.39658	1.11545	1.02955	1.33497	1.34079	1.32801	1.36309	1.21749	1.25894	1.2376	1.02459	0.94012	1.14693	0.422049	0.495659	1.02749	1.04153	0.970873	0.976854	0.903338	0.85878	0.55613	0.703497	1.05119	1.13925	0.230422	0.343075	2.18774	1.23037	1.20832	1.17235	0.753433	1.05065	1.39056
14788	b0651	ribonucleoside hydrolase 1 (NCBI)	0.190354	0.239405	0.335804	0.0396968	0.354406	0.306108	0.265853	0.0308612	0.595761	0.233503	0.140632	0.193552	0.173736	0.222148	0.205118	0.785614	0.245672	0.242935	0.224159	0.25134	0.220806	0.23694	0.217537	0.34901	0.142821	0.130865	0.418213	0.796025	0.213864	0.225013	0.158983	0.22656	0.312088	0.0992198	0.290131	-0.196052	-0.523328	0.0409116	0.12078	0.163255	0.416429	-0.0396547	0.382091	0.00850119	0.12565	0.200444	-0.525797
14789	b0652	glutamate and aspartate transporter subunit (NCBI)	0.344419	-0.634069	-0.0757912	-0.428153	0.180303	0.269221	-0.567016	-0.710098	-0.539296	-0.507154	-0.559766	-0.562784	-0.582409	-0.235665	-0.384692	-0.63548	-0.512234	-0.515717	-0.532293	-0.512291	-0.290908	-0.602747	-0.64492	-0.312031	-0.361617	-0.461349	-1.12117	0.22847	-0.37805	-0.369685	-0.435403	-0.432916	-0.0850307	-0.741233	0.468938	-0.00502706	1.4589	-0.0224885	-0.790508	-0.379762	-0.396658	-0.439414	-0.374183	-0.498675	-0.584585	-0.375015	1.0074
14790	b0653	glutamate and aspartate transporter subunit (NCBI)	-0.102401	-0.575592	-0.910303	-0.985446	-0.0373407	-0.218239	-0.74487	-0.405963	-0.408396	-0.682854	-0.464939	-0.729162	-0.753595	-0.5236	-0.679796	-0.585525	-0.687842	-0.68539	-0.709441	-0.690039	3.29685	-0.766774	-0.567507	-1.1572	-0.684113	-0.641645	-0.691563	-0.48647	-0.559665	-0.337175	-0.611409	-0.588336	-0.759053	-0.523987	0.0179912	-0.875365	-0.907587	-0.850212	-0.53927	-0.114863	-0.629132	-0.699126	-0.63298	-0.555683	-0.206939	-0.540434	-0.167749
14791	b0654	glutamate and aspartate transporter subunit (NCBI)	0.0923337	-0.338713	-0.732203	-0.768001	-0.435262	-0.30481	-0.798659	-0.832415	-0.762773	-0.639874	-0.783731	-0.791839	-0.811643	-0.558032	-0.522124	-0.317426	-0.754635	-0.743889	-0.762026	-0.757064	-0.545537	-0.500406	-0.869391	-0.589241	-0.809339	-0.633778	-0.787611	-0.2099	-0.79773	-0.797732	-0.851587	-0.53025	-0.924781	-0.374868	-0.63306	0.13896	0.0735141	-0.849411	0.214914	-0.164533	-0.419068	-0.492842	-0.467631	-0.640516	-0.616088	-0.817035	-0.609732
14792	b0655	glutamate and aspartate transporter subunit (NCBI)	-0.00651334	-0.678584	-0.618436	-0.943303	-1.39089	-1.13145	-0.241245	-0.389285	-0.198846	-0.180201	-0.219842	-0.218178	-0.23803	-0.307716	-0.387521	-0.173527	-0.180642	-0.169709	-0.1884	-0.181649	-0.314822	-0.254207	-0.29561	-0.652491	-0.716741	-0.514352	-0.411148	-1.12409	-0.432307	-0.432462	-0.4863	-0.463221	1.11378	-0.189192	-0.608813	-0.319854	1.03492	-0.817667	0.25101	-0.087449	-0.890668	-0.269921	-0.884783	-0.760577	-0.256359	-0.650554	-1.32443
14797	b0660	predicted protein with nucleoside triphosphate hydrolase domain (RefSeq)	0.102467	1.10169	0.96638	0.637439	0.186431	0.80711	0.77365	0.671956	0.839436	0.885981	0.823717	0.857432	0.83279	0.775644	0.668237	0.387573	0.900336	0.903598	0.877149	0.904297	0.767653	0.827177	0.821048	0.442077	0.358711	1.12272	0.473262	0.488289	1.20521	1.21785	1.15166	1.15452	1.01758	0.911061	0.207828	1.35046	2.06774	0.85134	0.381646	-0.241736	1.11657	1.07103	1.1092	1.01442	0.94952	1.39559	0.281006
14798	b0661	isopentenyl-adenosine A37 tRNA methylthiolase (NCBI)	0.0892297	-0.217855	-0.248468	-0.29865	-0.375639	-0.381822	-0.234998	-0.381584	-0.191943	-0.0790071	-0.212989	-0.209527	-0.0141872	-0.120688	-0.378919	1.47146	-0.0815661	-0.160886	-0.179706	0.233414	-0.30584	-0.245206	-0.287009	-0.500415	-0.467327	-0.197087	-0.336216	-0.480598	-0.261732	-0.252186	-0.181063	-0.266369	-0.109983	0.0595414	-0.391015	-0.0387339	-0.375867	-0.574098	-0.116125	-0.151034	-0.282749	-0.496079	-0.433437	-0.0646056	-0.257643	-0.170042	-0.365355
14804	b0674	asparagine synthetase B (NCBI)	-0.000574236	-0.641266	-0.452035	-1.02806	-0.102678	-0.806763	-0.537927	-0.570249	-0.496467	-0.478178	-0.255505	-0.516166	-0.53602	-0.419098	-0.507146	-0.462781	-0.47856	-0.467621	-0.486329	-0.47951	-0.460796	-0.459498	-0.593687	-0.93245	-0.75768	-0.467193	-0.43031	-0.927178	-0.536066	-0.526174	-0.593436	-0.590952	-0.278652	-0.683145	-0.35191	-0.126729	0.0990888	-0.578824	0.0770608	-0.0996586	-0.523459	-0.242956	-0.505326	-0.545007	-0.375044	-0.628441	0.491631
14805	b0675	UMP phosphatase (NCBI)	-0.0149548	-0.173159	0.0384506	-0.249241	-0.579485	-0.724968	0.157997	0.0149095	0.203115	0.223919	0.434728	0.187403	0.167535	0.102498	0.168289	-0.0476544	0.225058	0.236054	0.217176	0.224519	0.162189	0.151945	0.279609	-0.22815	-0.305038	0.0693721	-0.335681	-0.496438	-0.00457588	0.00516737	-0.0620773	0.0773784	-0.0342789	-0.082869	-0.585944	-0.687451	-0.557668	-0.0442566	-0.577255	-0.75947	0.273575	0.224722	0.155046	0.661342	-0.131643	0.34147	-0.483353
14806	b0676	DNA-binding transcriptional dual regulator, repressor of N-acetylglucosamine (NCBI)	-0.569919	0.398036	0.569401	0.250798	-0.487957	0.0557406	0.220846	0.0955393	0.486706	0.312473	0.240798	0.273791	0.255743	0.347122	0.109314	0.130676	0.311472	0.322585	0.310219	0.323632	0.308608	0.241266	0.211035	0.136506	-0.0273713	0.161125	-0.484781	-0.228266	0.245385	0.249148	0.192388	0.28658	0.0542897	0.351187	-0.252607	1.33822	0.689808	0.634789	-0.0892569	-0.240136	0.479509	0.568296	0.460958	0.615273	0.586093	0.568408	-0.473425
14807	b0677	N-acetylglucosamine-6-phosphate deacetylase (NCBI)	-0.478671	2.14212	2.19217	1.85727	1.18843	1.66688	2.14823	2.34985	2.25228	2.35697	2.22858	2.36427	2.37326	2.32333	2.20169	1.98978	2.40959	2.42194	2.40343	2.44349	2.30552	2.3657	2.40977	1.96988	1.95953	2.14088	1.49012	1.45421	2.20748	2.21852	2.16096	2.18478	2.04364	1.88337	1.62886	2.0792	1.3238	1.88502	0.168681	0.580938	2.4444	2.36423	2.21736	2.17953	2.12034	2.4669	0.253715
14808	b0678	glucosamine-6-phosphate deaminase (NCBI)	0.00123211	-0.0159078	0.323413	0.199279	-0.50904	0.0725504	-0.0200488	-0.175611	0.0201517	0.0446001	-0.00315455	0.00278677	0.309518	-0.0351415	-0.163397	0.00631485	0.0651183	0.0792088	0.0323321	0.051442	-0.0360374	-0.0331119	0.556166	0.140578	-0.0801967	0.148798	-0.493808	0.350586	0.216833	0.219474	0.16284	0.553726	0.0455668	0.168581	-0.116994	-0.328882	-0.421651	-0.117993	0.00195949	-0.0487738	0.00657784	-0.0587019	0.010964	-0.102182	-0.550233	0.361465	-0.683176
14809	b0679	fused N-acetyl glucosamine specific PTS enzyme: IIC, IIB , and IIA components (NCBI)	0.0347935	-0.0730075	0.363879	-0.0117215	-0.245631	-0.0774908	-0.0226265	-0.134656	0.162528	0.194698	-0.00322662	0.174726	0.0105588	-0.00956416	0.000564394	-0.201887	0.0698027	0.0839896	0.155669	0.056865	-0.0307804	0.140087	-0.0352441	0.0451769	0.996908	0.136201	-0.472989	-0.367867	0.0461618	0.0483383	0.0766768	0.0149055	-0.000527722	0.0523397	-0.137333	0.0423298	-0.0498779	0.0355095	-0.124663	0.157151	0.0918896	0.141727	0.077433	0.0954107	0.0730174	-0.0749466	1.00631
14811	b0681	predicted outer membrane porin (NCBI)	-0.0575547	-0.332707	-0.319709	-0.260368	-0.558991	-0.334499	-0.176132	0.124265	-0.136675	-0.0189445	-0.163482	-0.138425	-0.151444	-0.194022	-0.0271194	-0.311463	-0.0908352	-0.0765684	-0.123795	-0.103903	-0.182235	-0.0738561	-0.198622	-0.00447395	0.124767	-0.120743	-0.481998	0.234039	-0.178964	-0.177075	-0.243907	-0.22119	-0.367539	-0.235404	-0.616975	0.160292	0.0416932	0.0266952	0.0412686	-0.146727	-0.143008	1.68449	-0.0590642	0.00319429	-0.0204922	-0.303019	-0.075236
14812	b0682	predicted lipoprotein (NCBI)	0.0645825	-0.140331	0.317022	-0.381837	-0.646524	-0.828956	-0.533734	-0.68746	-0.504552	-0.492741	-0.531208	-0.523826	-0.53675	-0.579534	-0.153299	-0.916461	-0.476992	-0.463093	-0.509234	-0.492876	-0.565993	-0.10086	-0.58409	-0.94474	-0.300227	-0.50484	0.0822038	-0.104176	-0.422185	-0.42274	-0.489297	-0.456654	0.0668958	-0.76666	-0.0824285	-0.135287	-1.09733	-0.581701	-1.26634	0.564218	-0.100076	0.219008	0.242649	-0.216889	-0.462212	-0.394202	-2.61867
14813	b0683	ferric uptake regulator (NCBI)	-1.08355	3.612	3.66421	3.32355	2.23562	2.87799	4.09483	4.39035	4.35018	4.58383	4.33112	4.72807	4.71235	4.67231	4.5964	4.36402	4.78006	4.8021	4.73592	4.83039	4.77854	4.74206	4.66537	4.35376	4.33346	3.70468	3.04324	2.83874	3.78201	3.8072	3.74974	3.77327	3.62273	3.45407	2.81385	1.33847	1.16342	1.91544	-0.0153467	-2.07194	2.4174	2.36461	2.35668	2.30868	2.05157	3.49087	2.23301
14815	b0685	orf, hypothetical protein (VIMSS)	-0.310599	-0.40254	-0.33071	-0.0992409	-0.168625	-1.09018	-0.292251	-0.441728	-0.254825	-0.234687	-0.280755	-0.26152	-0.261587	-0.326083	-0.405712	-0.646732	-0.210783	-0.196459	-0.246274	-0.235997	-0.28062	-0.326509	-0.332025	-0.691341	0.286349	-0.552697	-1.18216	3.18208	-0.468506	-0.4706	-0.525018	-0.503419	-0.650585	-0.814523	-0.71338	-1.60037	-0.267454	0.0881595	0.442026	0.176271	-0.582115	-0.638833	-0.565924	-0.690541	-0.672801	-0.0337746	-2.28112
14816	b0686	hypothetical protein (NCBI)	-0.0140887	-0.535824	-0.481564	-0.513737	-0.251427	-0.665126	-0.63824	-0.234254	-0.601379	-0.576771	-0.630426	-0.601841	-0.615512	-0.391442	-0.47168	0.0571414	-0.564892	-0.550911	-0.593332	-0.576495	-0.240903	-0.494087	-0.67285	-0.710025	0.00692389	-0.549267	-0.615332	-0.744304	-0.463013	-0.462785	-0.52943	-0.496774	-0.645462	-0.655406	-0.380237	0.148748	-0.175344	-0.294732	-0.0683266	-0.229937	-0.405766	0.0249788	-0.404936	-0.522653	0.258537	-0.335943	-0.536656
14818	b0688	phosphoglucomutase (NCBI)	-0.668293	3.54559	3.58683	3.27324	2.48639	2.83303	4.0436	4.24762	4.25714	4.4456	4.22621	4.54907	4.53386	4.57665	4.39231	4.17421	4.59742	4.6174	4.55726	4.63168	4.67922	4.5423	4.48063	4.19559	4.13946	10.1853	8.16718	5.15694	3.51755	3.53784	3.46897	3.503	3.35172	3.18019	2.55584	3.7473	8.31195	8.07532	5.01028	3.18253	3.58741	3.51782	3.43164	3.46916	3.28993	2.90344	8.86995
14819	b0689	hypothetical protein (NCBI)	0.154121	0.566087	0.496825	0.349063	0.742403	0.351487	0.474395	0.351194	0.293163	0.333103	0.541486	0.320565	0.332574	0.464215	2.06002	0.561578	0.358723	0.37331	0.493912	0.351787	0.274349	0.444104	0.564546	0.37419	0.595726	0.988233	0.662105	0.77904	0.295389	0.298892	0.231882	0.264686	0.408344	0.417782	0.358317	0.285854	0.146599	0.186728	0.585384	-0.35783	0.472074	0.33482	0.346997	0.395352	1.1887	0.363109	-0.125187
14821	b0691	orf, hypothetical protein (VIMSS)	0.0329395	1.94988	2.06276	1.97508	1.53073	1.53794	1.54431	1.55848	1.79839	1.70612	1.82003	1.71918	1.7227	1.77962	1.89575	1.79815	1.76	1.77589	1.72783	1.76302	1.7172	1.67576	1.76299	1.46374	1.64213	2.04021	1.48083	1.29026	1.81454	1.82765	1.75955	1.79288	1.64195	1.63146	1.37231	1.23156	0.985558	1.37377	0.604514	0.299496	1.79304	1.73237	1.89769	1.6755	1.33327	1.75626	0.858961
14823	b0692	putrescine/proton symporter: putrescine/ornithine antiporter (NCBI)	0.0151238	0.289937	0.110573	-0.130632	0.145071	0.26343	0.38275	0.589747	0.435462	0.685455	0.411074	0.476989	0.624074	0.406711	0.577646	1.02968	0.512022	0.527042	0.484354	0.615403	0.466598	0.610868	0.548943	0.611431	0.553833	0.450376	0.0399949	0.322153	0.416251	0.421681	0.354453	0.387338	0.285714	0.795774	0.216276	0.234325	-0.491206	-0.213055	0.164711	0.259726	0.167051	0.110714	0.284442	0.181854	0.0322525	0.0229764	-0.813396
14824	b0693	ornithine decarboxylase isozyme, inducible (NCBI)	-0.103701	0.604904	1.78422	0.419015	0.149601	0.516648	0.743904	0.701403	0.826006	0.841652	0.841492	0.835472	0.84267	0.771187	0.822343	0.529791	0.870227	0.885147	0.842747	0.865807	0.82432	0.82298	0.927166	0.55215	0.586822	0.69005	0.436798	0.640787	0.718195	0.766931	0.684864	0.688873	0.60557	0.563603	0.67219	0.724672	0.151893	0.471436	-0.214353	-0.0784639	0.858261	0.701747	1.6646	1.51784	0.522155	0.697747	-0.0662245
14826	b0694	DNA-binding response regulator in two-component regulatory system with KdpD (NCBI)	-0.14361	-0.555135	-0.115306	-0.477697	0.702889	-0.278584	-0.0763544	-0.223	-0.0363406	-0.0167631	-0.062279	-0.0433327	-0.0393332	-0.10962	0.253391	-0.0125423	-0.00671759	0.00743631	-0.0349019	-0.0206639	-0.0109122	0.151417	-0.109695	0.419612	0.608206	-0.38861	-0.22187	2.71778	-0.320937	-0.320163	-0.376589	0.00468958	-0.0858124	-0.362938	-0.122244	0.218708	-1.01458	-0.353444	-0.487755	0.297429	-0.145857	-0.302533	-0.415087	-0.534	-0.550721	3.29156	0.0503023
14827	b0695	fused sensory histidine kinase in two-component regulatory system with KdpE: signal sensing protein (NCBI)	-0.0332709	-0.494253	-0.592765	-0.539064	-0.333958	-0.965425	-0.582877	-0.59462	-0.396812	-0.371512	-0.342969	-0.526152	-0.485406	-0.489509	-0.487972	-0.31885	-0.488489	-0.473883	-0.51754	-0.498881	-0.4478	-0.344646	-0.422706	-0.601034	-0.385224	-0.214378	-0.513783	-0.352615	-0.655624	-0.65251	-0.353755	-0.678359	-0.276562	-0.21761	-0.369177	0.30985	-0.242539	-0.13807	-0.588495	0.00825551	-0.563691	-0.711445	-0.185767	0.475883	0.0224538	-0.520972	0.182344
14828	b0696	potassium-transporting ATPase subunit C (NCBI)	-0.259914	-0.133409	0.57087	-0.378153	-1.52959	-0.0283441	-0.0865053	-0.197578	1.08755	0.00842124	-0.0620752	-0.0139294	-0.0170537	-0.076327	-0.176365	-0.389747	0.031973	0.0466063	0.000858552	0.0224715	-0.0492198	-0.0627585	-0.0741995	0.174787	0.156143	-0.0929019	0.584443	-0.940547	-0.036377	-0.0247299	-0.092188	-0.055813	-0.194748	-0.367338	0.342948	-0.345995	0.286998	1.09974	0.0482619	-0.0536816	-0.204376	-0.271425	-0.216952	0.319129	0.394815	-0.261915	-2.48608
14829	b0697	potassium-transporting ATPase subunit B (NCBI)	-0.110235	-0.543725	-0.491454	-0.312364	0.0797673	-0.313976	-0.488452	-0.26238	-0.453481	-0.4309	-0.288371	-0.432753	-0.471316	-0.530837	-0.504673	-0.737805	-0.424058	-0.410148	-0.453765	-0.439099	-0.340805	-0.321324	-0.528624	-0.653498	-0.512496	-0.353092	-0.579499	-0.342604	-0.296407	-0.286945	-0.354158	-0.317834	-0.0993602	-0.48292	-0.320324	-0.41392	-0.942634	-0.664814	-1.04402	-0.153468	-0.337679	-0.195517	-0.141122	-0.450049	-0.175719	-0.224154	0.754717
14830	b0698	potassium-transporting ATPase subunit A (NCBI)	0.104279	-0.747946	-0.355782	-0.759768	0.244564	-0.411721	-0.260555	-0.890969	-0.705567	-0.684412	-0.731632	-0.708756	-0.704789	-0.651421	-0.74359	-0.292006	-0.671756	-0.65747	-0.700191	-0.684648	-0.331053	-0.581297	-0.635185	-0.629208	-0.504738	-0.61108	-0.67513	-0.908128	-0.647258	-0.646756	-0.703152	-0.67238	-0.70227	0.052338	0.729636	-0.427101	-0.869846	-0.587564	-0.17338	-0.202313	-0.46582	-0.432387	-0.438278	-0.567574	0.259059	-0.445339	-1.04773
14833	b0700	rhsC element core protein RshC (NCBI)	0.393677	0.298621	-0.167839	-0.157679	0.847663	0.0394822	-0.11171	-0.0569072	-0.0833207	-0.0541788	-0.100167	-0.0759699	0.158055	0.0590491	0.105492	0.125832	-0.039112	-0.0248476	-0.0720686	-0.0552216	0.489517	0.117188	0.297624	-0.093763	0.497094	0.228944	0.240003	0.0208917	-0.0899763	-0.0888159	-0.116688	-0.0629899	-0.159272	0.0458435	1.5512	-0.383648	0.0685267	-0.502174	-0.869287	0.0537156	1.0041	-0.254584	-0.468639	-0.137313	0.165722	-0.16779	-0.24237
14835	b0703	conserved protein, rhs-like (RefSeq)	0.146038	0.91422	0.884835	0.93711	1.2465	0.924146	0.903457	0.922824	1.01018	1.01755	0.943546	1.06476	1.13585	1.11834	1.02689	1.69598	1.10246	1.07215	1.02185	1.04874	1.09062	1.26175	1.08632	1.30366	1.56624	1.07973	1.19984	0.945106	0.99846	1.04628	0.938269	0.970867	0.956285	1.13994	1.12875	0.470766	0.345766	0.693513	0.168387	-0.114934	0.836103	0.809623	0.801302	0.957527	0.905621	0.8481	-0.142765
14838	b0706	hypothetical protein (NCBI)	0.0378845	2.82109	2.86624	2.58335	1.52083	2.11819	3.15751	3.25908	3.29635	3.41745	3.27103	3.47515	3.8447	3.41826	3.33414	3.13471	3.51544	3.5332	3.47963	3.53264	3.48709	3.4447	3.43049	3.0722	3.05324	3.83575	3.21419	2.98352	3.91531	3.94174	3.88414	3.91693	3.75484	3.57513	2.99049	2.53433	2.10773	3.07005	1.04009	0.30456	3.6036	3.53663	3.47454	3.50994	3.31297	3.07392	1.13202
14839	b0707	hypothetical protein (NCBI)	-0.0295648	1.10374	1.24172	0.90695	-0.219626	1.2172	0.83154	0.767663	0.901241	0.970745	0.883721	0.981988	0.985556	0.92802	0.842968	0.831629	1.02216	1.03801	0.986119	1.01823	0.981229	0.936902	0.915813	0.589385	0.50615	0.3894	0.915276	0.926897	0.471456	0.477821	0.41049	0.44462	0.341151	0.182789	-0.163561	-0.188553	0.684429	0.980631	0.959885	-0.467281	0.824131	0.764689	0.900413	0.727309	0.290712	0.356671	-0.987277
14840	b0708	deoxyribodipyrimidine photolyase, FAD-binding (NCBI)	-0.0434406	-0.61354	-0.474659	-0.632749	-0.228052	-0.178737	-0.516346	-0.337963	-0.494708	-0.481645	-0.521375	-0.220839	-0.496998	-0.311366	-0.663812	-0.842175	-0.404114	-0.483168	-0.4999	-0.488005	-0.529819	-0.563353	-0.246675	-0.641273	-0.0376054	-0.574961	-0.570215	-0.992034	-0.508055	-0.507872	-0.564232	-0.523431	-0.494946	-0.499739	-0.516312	-0.35865	0.0400101	-0.374573	-0.349451	0.304927	-0.266655	2.28709	-0.361416	-0.466192	-0.278819	-0.0885411	0.603782
14841	b0709	predicted transporter (NCBI)	0.00142683	-0.099631	-0.0561162	0.989121	-0.413636	0.00787163	-0.00726103	-0.149579	0.0247316	0.137465	0.167916	0.0588356	0.127449	-0.0252219	0.0185285	-0.223633	0.0397562	0.0541167	0.0363814	0.0515254	0.0767348	0.0720527	0.134236	0.0974963	-0.178788	-0.268532	-0.355687	-0.401347	-0.211856	-0.202251	-0.260418	-0.163699	-0.302403	-0.148047	0.105098	0.0384623	0.19875	-0.0943556	0.307981	0.333178	0.0197886	0.0829193	0.066586	-0.0507402	0.0481354	-0.026729	-0.0451087
14842	b0710	conserved metal-binding protein (NCBI)	0.218818	0.463571	0.507176	0.223177	0.0102364	0.0287066	0.508535	0.374778	0.544694	0.580473	0.515539	0.552786	0.573566	0.509242	0.423722	0.227536	0.600782	0.615261	0.567403	0.586297	0.551703	0.506018	0.492685	0.147423	0.517481	0.45513	-0.13718	0.10693	0.521656	0.52402	0.467418	0.508391	0.35215	0.402313	-0.0389705	0.675093	0.12506	-0.204488	-0.648104	-0.135191	0.359195	0.23271	0.280192	0.735629	-0.2343	0.300707	0.433484
14843	b0711	predicted enzyme subunit (NCBI)	-0.0661534	0.69478	0.655132	0.370167	0.132542	0.492431	0.586437	0.458152	0.625367	0.66369	0.597308	0.638011	0.658767	0.595047	0.598505	0.315174	0.686167	0.947162	0.652604	0.672402	0.63771	0.592129	0.577978	0.300707	0.398524	0.26238	-0.330286	0.144735	0.328989	0.33125	0.671528	0.315587	0.159261	0.238812	0.440036	0.541934	1.06025	0.174596	-0.241152	-0.103914	0.701763	0.766445	0.504672	0.418992	0.187163	0.711516	-0.173029
14844	b0712	predicted enzyme subunit (NCBI)	0.222235	0.678621	0.586087	0.471705	-0.218818	0.327509	0.414232	0.499365	0.452759	0.4818	0.424624	0.616607	0.480227	0.422544	0.336541	0.449756	0.481547	0.496211	0.477578	0.495619	0.452738	0.418687	0.405475	0.389995	0.107922	0.692477	0.230402	-0.288062	0.603492	0.61633	0.557803	0.592966	0.570456	0.849676	0.825347	0.104235	0.026303	0.672482	-0.357607	0.514444	0.605088	0.57696	0.435454	0.362236	2.35192	0.767134	0.917661
14845	b0713	hypothetical protein (NCBI)	0.218047	-1.17279	-1.13529	-0.225751	-0.919757	-0.535093	-0.955606	-0.737019	-0.938476	-0.932982	-0.965103	-0.989799	-0.965023	-1.00597	-1.11432	-0.0699986	-0.950508	-0.941162	-0.950812	-0.947594	-1.00496	-1.01929	-1.02564	-0.799965	-1.39177	-0.839759	-0.691628	-0.746492	-0.791426	-0.784536	-0.841628	-0.438257	-0.592817	-0.0199795	-0.404604	-0.0242981	-1.15682	-0.572065	-0.516342	-0.289371	-1.15542	-1.18441	-1.12101	-0.82991	-1.65659	-1.03727	0.357517
14846	b0714	endonuclease VIII/ 5-formyluracil/5-hydroxymethyluracil DNA glycosylase (NCBI)	0.119679	-0.48184	-0.448144	-0.291398	-0.901275	0.329476	-0.278304	-0.426273	-0.249263	-0.233111	-0.276039	-0.281845	-0.257164	0.0709756	-0.383502	-0.561309	-0.241814	-0.232098	-0.242844	-0.23608	-0.293999	-0.311155	-0.317574	-0.661219	-0.680483	0.0647171	-0.313473	-0.490179	-0.0306437	-0.0219999	-0.0792865	-0.00261957	0.167654	0.448871	-0.24168	-0.0139902	-1.09315	0.0740237	-1.20431	-0.0940218	-0.146907	-0.184024	-0.131748	-0.226457	-0.287423	-0.296625	-1.07882
14847	b0715	putative transport protein (VIMSS)	-0.0860206	-1.28421	-1.19777	-1.12747	-0.286142	-0.249081	-1.36679	-0.487822	-1.35817	-1.35602	-1.38587	-0.890682	-1.37774	-1.43596	-1.2872	-1.23326	-1.37859	-1.26747	-1.38072	-1.37162	-1.41301	-1.22004	-1.19459	-1.21979	-1.29693	-1.36536	-1.50803	-1.21081	-1.30771	-1.301	-1.35884	-0.987972	-1.24629	-1.10891	1.91894	-1.52776	-1.76722	-0.160779	-0.543357	-0.0719025	-0.853675	-0.795296	-0.960019	0.41507	0.0373138	-1.60158	0.399266
14848	b0716	orf, hypothetical protein (VIMSS)	0.0543974	0.953882	0.959824	0.958648	0.268542	0.549931	1.01796	1.08892	1.06949	1.11777	1.04853	1.1029	1.12353	1.10706	1.27894	1.03569	1.13283	1.14798	1.11759	1.14226	1.10667	1.19331	1.1568	0.814278	0.92333	1.17896	0.982058	0.807825	1.18899	1.19546	1.39274	1.17955	1.17615	1.15147	0.914422	0.937859	0.87875	0.92782	0.126037	0.192558	1.29259	1.22616	1.27528	1.42918	0.973744	1.22823	0.435426
14849	b0717	predicted assembly protein (NCBI)	0.334914	0.352411	-0.0840122	-0.597601	1.08957	0.755955	-0.467716	-0.618109	-0.440665	-0.414113	-0.461354	-0.445414	-0.424595	-0.389254	-0.472111	-0.174096	-0.416956	-0.402552	-0.430714	-0.413252	-0.378829	-0.194606	-0.501185	-0.830522	0.0732558	0.0748961	0.00535744	-0.273134	-0.352248	-0.348843	-0.0111212	-0.314927	-0.514173	-0.340506	0.0146996	-0.615856	-1.52066	-0.0464665	-0.575127	0.303191	0.00590939	-0.55712	-0.513511	0.260089	-0.572115	-0.523094	-0.163984
14850	b0718	putative outer membrane protein (VIMSS)	-0.0712569	-0.0281069	0.137583	-0.0574109	0.175494	-0.0263564	0.157184	-0.0948078	0.0414064	0.0711088	0.108056	0.0538459	0.1042	0.0114978	-0.0466457	0.144217	0.091459	0.143339	0.0624044	0.0838789	0.0911752	0.0125583	0.108777	0.227985	-0.259442	0.161958	0.456193	-0.166833	0.150066	0.192132	0.0859776	0.160038	0.0890546	0.125812	-0.141747	-0.165172	-0.120737	0.122853	0.205182	0.0168563	0.182198	0.612884	0.0504605	0.724121	0.158097	0.260569	-0.69511
14851	b0719	predicted fimbrial-like adhesin protein (NCBI)	-0.0313117	0.891599	0.740307	0.67799	0.552064	0.130572	0.790946	0.682526	0.856782	0.891106	1.37096	0.888932	0.894294	0.995388	0.906753	0.952124	0.922501	0.937539	0.894793	0.923632	0.877265	0.927381	1.03041	0.822696	0.745625	0.943606	0.82507	0.588385	0.944915	0.949856	0.894652	0.988444	0.965092	0.777065	0.439047	0.447884	0.0814782	0.589518	0.275208	-0.260942	0.801263	0.797881	0.669086	0.856586	0.733993	0.850864	1.3369
14852	b0720	citrate synthase (NCBI)	-0.25386	0.503703	0.541628	0.263311	0.0288687	0.134253	0.49447	0.354215	0.544277	0.562989	0.506186	0.546699	0.553655	0.738845	0.415254	0.844747	0.58042	0.740702	0.55389	0.576912	0.732219	0.48485	0.817346	0.156852	0.241815	0.475646	0.134666	-0.0467464	0.559578	0.561051	0.506236	0.537104	0.452466	0.456471	0.182345	-0.298533	-0.136646	-0.118237	-0.0903342	-0.00775488	0.383997	0.320133	0.36046	0.279423	0.042453	0.550379	-0.492868
14853	b0721	succinate dehydrogenase cytochrome b556 large membrane subunit (NCBI)	-0.0764211	-0.33449	-0.294422	-0.184946	-1.46255	-0.633008	-0.00981798	0.0379648	0.0314365	0.0351945	-0.00963691	-0.00264638	0.0182246	-0.0398501	-0.121788	-0.170965	0.0445887	0.0587148	0.0164579	0.0333637	-0.00655168	-0.0569459	-0.0582509	-0.379719	-0.0743295	-0.0570376	-0.715617	0.0895188	-0.0816016	-0.0810416	-0.0563637	-0.113777	-0.263494	-0.437474	-0.482455	0.590055	-0.891653	0.0406622	-1.13137	0.593241	0.580283	0.0591661	0.102237	0.20504	-0.403141	-0.409246	-0.708328
14854	b0722	succinate dehydrogenase cytochrome b556 small membrane subunit (NCBI)	-0.31566	0.634432	0.724947	1.14536	-0.0794549	0.430875	0.689728	0.559178	0.728595	0.764732	0.696746	0.791173	0.754735	0.703072	0.611979	0.446411	0.769095	0.783791	0.754758	0.770399	0.727576	0.690254	0.684611	0.418736	0.318305	0.911144	0.851169	-0.123504	0.749596	4.6856	0.697584	0.738634	0.589171	0.560018	-0.142554	0.351349	0.572478	0.534706	1.42741	-0.220272	0.707415	0.643009	0.681692	0.609263	0.52839	1.05455	0.483804
14855	b0723	succinate dehydrogenase flavoprotein subunit (NCBI)	-0.300008	0.64513	0.663776	0.619179	-0.285141	0.0983206	0.729759	0.750182	0.791641	0.962045	0.750206	0.837628	0.863212	0.760296	0.672991	1.60919	0.840497	0.85608	0.811003	0.834597	0.793461	0.746997	0.760897	0.572749	0.69195	0.505999	0.904091	-0.106645	0.588288	0.591992	0.524959	0.629094	0.547128	0.499381	0.284247	1.47045	0.514644	0.947152	0.132888	0.358517	1.04597	1.01364	1.04361	0.991397	0.823115	0.53785	-0.71071
14856	b0724	succinate dehydrogenase, FeS subunit (NCBI)	-0.165631	1.17713	1.21087	0.952666	0.0984664	0.508662	1.62437	1.84152	1.71416	1.76664	1.6739	1.77808	1.78471	1.73291	1.6477	1.47185	1.81438	1.83011	1.78532	1.82076	1.78806	1.72904	1.74958	1.38772	1.49547	1.20832	0.713129	0.551216	1.29146	1.29742	1.38632	1.26414	1.11564	1.19851	0.856875	1.15521	0.938622	1.54756	-0.0732263	0.487654	1.54732	1.47214	1.48464	1.44244	1.04759	1.24683	0.236311
14858	b0726	alpha-ketoglutarate decarboxylase (NCBI)	0.0648902	2.97492	3.00139	2.7335	2.20426	2.28866	3.44899	3.5731	3.6136	3.7342	3.57057	3.80079	3.80667	3.76031	3.70098	3.51178	3.84087	3.85906	3.81261	3.87892	3.82262	3.77148	3.77078	3.44637	3.56033	3.11962	2.5557	2.30213	3.21709	3.23804	3.17594	3.18939	3.03217	2.85811	2.46772	4.04214	2.08247	3.11665	1.24155	0.0333301	3.66154	3.59007	3.48448	3.56391	3.11227	2.74074	0.474517
14860	b0728	succinyl-CoA synthetase subunit beta (NCBI)	-0.269461	0.126473	0.00234363	0.331234	-0.373886	-0.373121	-0.0105684	0.0223062	0.264904	0.0303465	-0.015099	0.00635444	0.013312	-0.0364014	-0.124849	0.188438	0.0384156	0.0524044	0.0183663	0.0444109	-0.00618689	0.17655	-0.0254109	-0.373899	-0.0997279	0.369212	-0.418529	-0.0170333	0.229142	0.234456	0.174099	0.186391	0.202413	0.0157659	0.00626557	-0.535164	0.0425797	-0.141755	-0.305038	0.147471	0.164755	0.110444	0.157943	0.164824	-0.36521	0.382673	-1.02797
14861	b0729	succinyl-CoA synthetase subunit alpha (NCBI)	-0.590938	1.12142	1.14279	1.6439	0.782066	0.832302	1.69952	1.98929	1.78653	1.83529	1.74318	1.84309	1.84976	1.79801	1.71277	1.84718	1.8789	1.89444	1.85021	1.88379	2.23406	1.79243	1.8147	1.47371	1.47453	1.25963	1.01798	0.674268	1.34279	1.34795	1.29272	1.31477	1.16654	1.00077	1.99869	0.0245779	1.9917	0.503458	0.320087	0.279431	1.00768	0.938576	0.973495	0.903121	0.469026	1.17517	0.678998
14863	b0731	fused 2-O-a-mannosyl-D-glycerate specific PTS enzymes: IIA component/IIB component/IIC component (NCBI)	-0.0907041	-0.498563	-0.341221	-0.585896	-0.156697	-1.1037	-0.405208	-0.337898	-0.365926	-0.36348	-0.418153	-0.402103	-0.381225	-0.0382761	-0.238295	-0.217713	-0.354862	-0.340766	-0.382932	-0.0716838	-0.14768	-0.453421	-0.433136	-0.711869	-0.170847	-0.261184	-0.980339	-0.474938	-0.345502	-0.34423	-0.410992	-0.236188	-0.242691	0.248367	-0.62614	-0.415267	0.307376	-0.237404	0.170177	0.0878423	-0.143895	-0.186862	0.224133	0.025713	-0.152661	-0.112586	0.354806
14864	b0732	alpha-mannosidase (NCBI)	0.0474635	0.420563	0.427016	0.46445	0.494593	0.304615	0.419583	0.400517	0.479325	0.518421	0.425678	0.477577	1.03673	0.447627	0.816165	0.567732	0.506984	0.52187	0.492281	0.509773	0.477894	0.514909	0.452777	0.28823	0.401895	0.494448	0.375819	0.191705	0.462213	0.466882	0.417574	0.491639	0.507001	0.445606	0.360203	0.27907	0.0249778	0.212943	0.148463	-0.093516	0.480529	0.511106	0.719309	0.532984	0.39697	0.486142	0.353303
14867	b0735	conserved inner membrane protein (NCBI)	-0.0853735	-1.79081	-1.77088	-2.00706	-0.65003	-1.8697	-1.32797	-1.47722	-1.30408	-1.31793	-1.35719	-1.36458	-1.34358	-0.877803	-1.48423	-0.79539	-1.33765	-1.32396	-1.35001	-1.34398	-1.3853	-1.42021	-1.39572	-1.18104	-1.26659	-1.58113	-1.56387	-0.985727	-1.51394	-1.51594	-1.57206	-1.54139	-1.67969	-1.43452	0.314508	-0.0339426	-2.30469	-0.809335	0.227488	0.539584	-1.36223	-0.854145	-1.35839	-1.46657	-0.940245	-0.712911	-2.98428
14868	b0736	predicted acyl-CoA thioesterase (NCBI)	0.027531	0.431869	0.450044	1.06367	0.129696	-0.233401	0.897241	0.842204	0.967685	1.00005	0.912151	1.0009	1.00768	0.955335	0.869825	0.70747	1.03573	1.05098	1.00541	1.03306	0.99118	0.946153	0.972079	0.626201	0.593016	1.10672	0.535743	0.281614	1.18816	1.20147	1.13335	1.16652	1.01593	0.843524	0.277378	0.64775	-0.171142	0.420509	0.781237	0.446768	0.926193	0.869784	0.896401	0.829805	0.726035	0.552048	0.404359
14869	b0737	membrane spanning protein in TolA-TolQ-TolR complex (NCBI)	-0.917882	3.30452	3.3163	3.04409	1.94645	2.6163	3.46152	3.59932	3.62937	3.75394	3.57183	3.82779	3.83359	3.78714	3.70061	3.54396	3.86624	3.88477	3.83172	3.89408	3.84292	3.80136	3.79758	3.47255	3.57062	3.59828	3.02236	2.77183	3.67923	3.69898	3.64213	3.66515	3.51495	3.89011	3.1008	2.59364	1.85761	3.06709	1.24769	0.783253	3.26627	3.20211	3.15483	3.17252	2.73579	3.52862	1.24845
14870	b0738	membrane spanning protein in TolA-TolQ-TolR complex (NCBI)	-1.16049	3.68303	3.7051	3.41542	2.50489	2.99173	4.07811	4.28232	4.28128	4.43482	4.22958	4.53651	4.54196	4.49715	4.41305	4.25663	4.5747	4.59434	4.54362	4.62385	4.56564	4.53427	4.513	4.18669	4.15746	4.24095	3.83169	3.40887	4.33642	4.36976	4.30629	4.32064	4.16088	3.99198	3.41242	3.6537	2.18612	3.17898	1.08478	-0.00701515	3.72054	3.65047	3.56713	3.62337	3.18498	3.62784	1.34979
14871	b0739	cell envelope integrity inner membrane protein TolA (NCBI)	-0.7135	4.05234	4.05268	3.76633	3.09343	3.33779	3.17822	3.2593	3.31949	3.41467	3.27151	3.46511	3.47571	3.42873	3.34352	3.29384	3.50398	3.52141	3.47719	3.53624	3.47122	3.44684	3.44486	3.10309	4.15727	4.05171	3.46574	3.28454	4.20608	4.16258	4.1044	4.128	3.97405	3.80419	3.29161	3.05272	1.96436	2.86433	1.23049	0.198494	3.39691	3.32997	3.2739	3.30024	2.87708	3.4436	1.15732
14872	b0740	translocation protein TolB precursor (NCBI)	-1.5228	3.37775	3.45348	3.1169	2.11001	2.68722	3.20501	3.27973	3.33683	3.43483	3.30799	3.48724	3.49782	3.47192	3.36587	3.20199	3.52621	3.54372	3.60798	3.55909	3.49408	3.46698	3.46713	3.12835	3.27642	4.49717	3.96476	3.75654	4.52111	4.55134	6.16257	4.51742	4.36516	4.19788	3.78866	3.33612	2.29786	3.34458	1.74176	0.0566977	3.87826	3.82099	3.71551	3.79663	3.77748	3.7311	1.5618
14873	b0741	peptidoglycan-associated outer membrane lipoprotein (NCBI)	-0.999948	3.29963	3.30616	3.03988	2.11214	2.61165	3.1872	3.26405	3.31928	3.41354	3.29597	3.47039	3.47725	3.4535	3.34538	3.18889	3.5205	3.53851	3.48273	3.55755	3.49924	3.45052	3.45575	3.10698	3.07726	3.27653	2.81923	2.60195	3.37653	3.3998	3.33744	3.35085	3.19009	3.02817	2.92901	2.47547	1.77091	2.61976	1.18591	-0.257769	3.1412	3.08925	3.03915	3.05775	2.65317	3.22567	2.05983
14874	b0742	hypothetical protein (NCBI)	-0.104564	0.979545	0.706048	0.715758	0.0616628	0.193542	0.587323	0.538742	0.623998	0.63086	0.601748	0.649455	0.627656	0.601502	0.492005	0.481312	0.664043	0.678917	0.661513	0.677147	0.606959	0.571446	0.604132	0.23768	0.479661	0.675567	0.504066	0.305319	0.778011	0.785598	0.724988	0.743527	0.578883	0.741251	0.618655	0.949269	0.575251	0.312353	0.0827123	0.10039	0.562727	0.508819	0.534834	0.475263	0.170668	0.584466	0.0832602
14875	b0750	quinolinate synthetase (NCBI)	0.335286	-0.519528	-0.502069	0.000586132	0.226809	0.135443	-0.583848	-0.729263	-0.566271	-0.576263	-0.58829	-0.599766	-0.591954	-0.621467	-0.728247	-0.644996	-0.572374	-0.542555	-0.587353	-0.356935	-0.116869	-0.0118871	-0.61581	-0.0585727	-0.667705	-0.190362	0.589367	-0.290003	-0.367924	-0.363599	-0.423847	-0.419718	-0.569762	0.158081	0.243196	-0.792868	-0.874762	-0.627288	-0.0735648	0.260159	-0.0927354	-0.542961	-0.497576	0.0650496	-0.124385	0.0805561	0.277123
14876	b0751	predicted nicotinamide mononucleotide transporter (NCBI)	-0.070697	0.80335	0.576533	0.318706	0.715627	0.829343	0.705647	0.598039	0.74319	0.750501	0.720941	0.739742	0.747406	0.718316	0.611782	1.011	0.768258	0.798651	0.752152	0.79686	0.777661	0.691194	1.0291	0.571747	0.752317	0.984464	0.846793	0.630679	0.926721	0.934475	0.873847	0.878236	0.7498	0.87263	0.758311	1.09983	-0.104528	0.738689	0.0247424	0.0157226	0.723479	0.638767	0.670474	0.604675	1.03935	1.02344	1.72987
14877	b0752	zinc transporter ZitB (NCBI)	-0.000245564	0.119812	0.561114	0.586916	0.896433	0.0864555	0.25406	0.14392	0.284022	0.284845	0.26187	0.269388	0.85742	0.60528	0.160259	0.686112	0.297487	0.32767	0.281792	0.324508	0.74387	0.218954	0.253486	0.396568	0.154166	1.30677	0.836479	0.154033	0.51963	0.527039	0.466448	0.470743	0.585608	0.254456	0.836333	-0.531163	-0.497915	0.00938629	-0.215242	-0.221102	0.175597	0.131372	0.159689	0.0944118	0.241795	0.332019	0.607862
14878	b0753	hypothetical protein (NCBI)	-0.0921232	-0.264381	-0.265654	0.324884	-0.00197934	-0.262206	0.101142	-0.0202745	0.125371	0.12085	0.103275	0.101164	0.108933	0.0795471	-0.00815491	0.219176	0.128882	0.158866	0.113575	0.154383	0.0848085	0.0489138	0.0851832	0.378413	0.0908152	-0.0512699	-0.596756	0.244217	0.0515876	0.0567695	0.250353	-0.000447798	-0.127631	-0.0625115	-0.584463	-0.0963627	-0.113908	-0.636302	-0.409814	-0.462107	-0.182609	0.104577	0.232046	-0.228054	-0.324588	-0.0951624	1.18757
14879	b0754	3-deoxy-D-arabino-heptulosonate-7-phosphate synthase, phenylalanine repressible (NCBI)	0.150554	-0.3232	-0.325242	-0.315096	-0.817745	-0.743735	-0.249379	-0.367402	-0.223737	-0.226237	-0.242229	-0.243905	-0.236162	-0.265539	-0.353217	-0.224275	-0.215943	-0.185853	-0.231453	-0.18962	-0.259425	-0.295239	-0.259914	-0.490864	0.270993	-0.28487	-0.835531	-0.680916	-0.182075	-0.175958	-0.236407	-0.00160713	-0.149191	-0.327035	-0.109649	0.149611	-0.012312	-0.1471	0.792044	-0.0893921	-0.15122	-0.170956	-0.125788	-0.0778912	-0.234128	-0.0927227	0.237034
14880	b0755	phosphoglyceromutase (NCBI)	0.0104078	-0.329038	-0.32952	-0.482828	-0.254693	-0.789186	-0.089532	-0.217497	-0.0687585	-0.076453	-0.0907557	-0.0985235	-0.090726	-0.120103	-0.207825	-0.202004	-0.071076	-0.0412004	-0.0861696	-0.0463986	-0.115724	0.0107762	-0.114455	-0.175719	0.315781	-0.13906	1.60253	0.679666	-0.0309523	-0.031304	-0.0916172	-0.0102125	0.127379	-0.0303909	0.0492105	-0.333251	-1.17907	-0.466535	0.618057	-0.152736	-0.264663	-0.258415	-0.202575	-0.280996	-0.168387	-0.0513177	0.495921
14881	b0756	galactose-1-epimerase (mutarotase) (NCBI)	0.0679353	-0.10198	-0.372986	-0.236251	-0.698893	-0.285041	-0.621622	-0.750836	-0.601694	-0.609504	-0.623777	-0.0458454	-0.623567	-0.653079	-0.594864	-0.912497	-0.603785	-0.573892	-0.618911	-0.472336	-0.0931123	-0.573372	-0.647431	-0.426539	-0.892696	-0.320332	-0.866789	0.148969	-0.212199	-0.211874	-0.272263	-0.26915	-0.396496	-0.5805	-0.656312	-0.184721	0.264959	-0.485227	-0.260444	-0.639398	-0.441752	0.231411	-0.0252905	-0.458371	-0.730314	0.185075	-0.541915
14882	b0757	galactokinase (NCBI)	0.262831	-0.0210676	-0.140535	-0.386676	-0.113364	-0.348838	-0.0714646	-0.0438958	-0.0417845	-0.0405572	0.14447	-0.0510339	-0.0475384	0.0532062	-0.133049	0.159761	-0.0270165	0.00321531	-0.0428027	0.000397351	-0.0696003	0.0236585	-0.0392236	-0.0978747	-0.000195762	-0.05721	-0.277989	0.104959	0.0506797	0.0529281	-0.00767728	-0.00446277	0.110079	-0.130145	0.23308	-0.410894	-0.628912	-0.0707729	0.739018	0.0580917	-0.114045	-0.191888	-0.156236	-0.2063	-0.272257	-0.26699	-0.739706
14883	b0758	galactose-1-phosphate uridylyltransferase (NCBI)	0.193844	-0.0644422	-0.377424	-0.626054	-0.0739011	-0.235876	-0.295469	-0.428529	-0.270922	-0.270189	-0.0785025	-0.292406	-0.280941	-0.11264	-0.252452	-0.166828	-0.26259	-0.246032	-0.280331	-0.253427	-0.313618	-0.341187	-0.313802	-0.450616	-0.0276726	-0.0858419	-0.329139	-0.191688	0.0195638	0.00145514	-0.0532598	-0.0327467	-0.180908	-0.344128	-0.0271551	-0.51059	-0.479166	0.5093	-0.37215	-0.11083	0.379907	-0.20738	0.108244	-0.0407931	-0.196452	-0.0344153	-0.453355
14884	b0759	UDP-galactose-4-epimerase (VIMSS)	0.221699	0.711837	0.902487	0.741968	1.07141	0.736216	0.825248	0.744136	0.876141	0.901935	1.05021	0.899918	0.911136	0.976079	0.776815	1.09685	0.931712	0.949233	0.912094	1.04775	1.01916	0.961225	0.878696	0.657983	0.498094	0.725946	0.675498	0.351239	0.830989	0.815691	0.907349	0.781328	0.62565	0.465053	0.339812	0.756762	7.00422	5.91162	4.86221	3.37488	0.966767	0.864403	1.14396	0.836671	0.527746	1.02071	-1.01559
14885	b0760	fused molybdate transporter subunits of ABC superfamily: ATP-binding components (NCBI)	0.208212	-0.162185	-0.176727	0.119223	0.358653	0.159808	-0.0865674	0.0451746	-0.0480322	-0.0375139	0.342114	0.103228	-0.0467039	0.0401101	-0.0954235	-0.332942	-0.0235954	-0.00896276	-0.0495466	-0.0277263	-0.0729367	-0.118606	0.0167383	-0.30674	-0.462337	0.187739	0.260566	0.228336	0.170271	0.171231	0.207112	0.268519	0.526825	-0.135906	-0.252508	0.978101	-0.499847	-0.24813	-0.579124	0.133828	0.141766	-0.0694069	-0.0644046	-0.0209262	-0.0583299	-0.355875	0.00102043
14886	b0761	DNA-binding transcriptional dual regulator (NCBI)	-0.0592058	0.777905	0.871001	0.7059	-0.392707	0.282401	0.748057	0.759265	0.791691	0.81205	0.744701	0.967422	0.811744	0.860664	0.677172	0.52179	0.831452	0.848611	0.812533	0.845192	0.784098	0.787729	0.768773	0.423666	0.507701	0.770204	0.579069	0.155219	0.690184	1.04662	0.626568	0.649424	0.611214	0.525058	0.0561735	0.602869	-0.115019	0.164166	0.677915	-0.0162762	0.477868	0.68605	0.663521	0.469373	0.303956	0.653623	-0.714044
14888	b0763	molybdate transporter subunit (NCBI)	-0.347045	-0.0958545	-0.324973	0.376465	-1.34371	-0.673149	-0.188152	-0.337734	-0.172476	-0.171838	-0.208522	-0.210632	-0.202791	-0.232258	-0.320041	0.441889	-0.183539	-0.153834	-0.1983	-0.16016	-0.210731	-0.266336	-0.236589	-0.324854	-0.127267	-0.282041	-0.547373	-0.791784	-0.176452	-0.196945	-0.251394	-0.230941	-0.378522	-0.317993	-0.672273	-0.67316	-0.0580537	-0.872558	-0.304132	-0.403705	-0.462609	-0.439813	-0.378017	-0.204256	-0.353684	-0.0455091	-1.01169
14889	b0764	molybdate ABC transporter permease protein (NCBI)	-0.0541229	0.40364	0.3862	0.216467	-0.0927451	0.481405	0.499388	0.403205	0.536284	0.557007	0.49991	0.529599	0.54412	0.515735	0.611457	0.254711	0.562855	0.593315	0.546622	0.592008	0.654207	0.486264	0.531684	0.190552	0.448043	0.0596437	-0.0216812	-0.377881	0.165008	0.146961	0.562828	0.505499	-0.0133665	0.0421084	-0.751026	-0.0996227	0.136655	0.386679	0.12607	0.472939	0.420102	0.431082	0.465723	1.51059	0.255948	0.432153	0.0553975
14890	b0765	molybdate transporter subunit (NCBI)	-0.0319689	0.582466	0.744173	0.874708	0.610818	0.414902	0.51797	0.403036	0.541552	0.559757	0.518638	0.527919	0.542482	0.728332	0.453776	0.265496	0.571719	0.587943	0.559772	0.686023	0.54117	0.755722	0.525408	0.322615	0.149068	0.566434	0.751179	0.419742	0.676867	0.678859	0.69403	0.622609	0.572387	0.648995	0.592422	0.880912	0.382485	0.838796	-0.892441	-0.29475	0.378883	0.823555	0.448329	0.582989	0.416736	0.389537	-0.891107
14891	b0766	predicted hydrolase (NCBI)	0.031139	4.66227	-0.166235	2.31099	-0.860004	0.24003	0.371664	-0.462133	-0.31756	-0.307861	-0.353831	-0.343606	-0.328987	0.0333469	-0.278136	-0.619379	-0.31106	-0.280982	-0.326544	-0.284817	-0.335286	-0.390461	0.0251216	0.143434	-0.022608	-0.382844	-0.503317	0.155343	-0.276576	-0.293937	-0.348738	0.0653922	-0.476724	0.771438	-0.0473711	1.24418	-0.0420993	-0.263466	-0.123716	0.188389	-0.309214	-0.385902	-0.328016	0.320009	0.298314	0.225479	-1.18088
14892	b0767	6-phosphogluconolactonase (NCBI)	-0.308003	2.65888	2.736	2.37582	1.45991	2.13834	2.31757	2.33109	2.41374	2.48212	2.36609	2.50435	2.51933	2.49445	2.40472	2.29902	2.54198	2.56086	2.51971	2.5688	2.53297	2.47973	2.47641	2.16094	2.13188	2.53315	1.97073	1.72463	2.61949	2.63139	2.56328	2.58684	2.44649	2.29723	1.87707	1.7891	2.08727	2.07837	0.587428	-1.32956	2.49669	2.49264	2.5008	2.50658	2.10419	2.63661	1.49872
14893	b0768	predicted DNA-binding transcriptional regulator (RefSeq)	0.100487	0.133142	-0.0391477	-0.0226645	-0.468736	-0.204401	-0.167053	0.341636	-0.133997	-0.12887	-0.178969	-0.16736	0.244896	-0.166399	-0.273113	-0.425588	-0.119814	-0.105393	-0.145353	-0.12557	-0.170417	-0.0531158	-0.181591	-0.529448	-0.0170017	-0.00528124	-0.144089	-0.259317	0.0910117	0.0754912	0.018814	0.0419661	-0.0990136	0.0923035	0.467442	2.26265	-0.49994	0.332687	0.284621	-0.254921	-0.25302	-0.238034	-0.157237	0.00112484	-0.513625	0.0152515	1.4884
14894	b0769	hypothetical protein (NCBI)	0.00572112	1.97212	1.94094	1.76786	1.08244	1.81433	2.06219	2.113	2.16068	2.22143	2.10592	2.21221	2.25411	2.21061	2.12482	2.12309	2.26203	2.29764	2.24899	2.28666	2.37755	2.19929	2.34336	2.149	2.0981	2.19885	1.7109	1.51653	2.20123	2.21231	2.15276	2.17575	2.01627	1.90946	1.78877	1.72265	1.06202	2.05518	0.482634	0.306528	2.25985	2.25825	2.1157	2.20828	1.86359	2.18845	0.801858
14895	b0770	predicted transporter (NCBI)	-0.00289218	0.773175	0.602611	0.620843	0.533539	0.365862	0.750728	0.711607	0.885366	0.948426	0.95813	0.846523	0.898549	0.814764	0.904359	0.834405	0.854262	0.882617	0.851716	0.873494	0.871594	0.796051	0.903662	0.715023	0.863128	0.669345	0.805921	0.55361	0.752053	0.768497	0.773657	0.730016	0.599645	0.717688	0.543567	0.476976	0.474086	0.580476	0.350119	-0.236995	0.701932	0.603617	0.688466	0.677848	0.375644	0.800247	0.275972
14896	b0771	putative enzyme (VIMSS)	-0.0118992	-0.153449	-0.0207647	0.0933733	-0.414163	-0.189076	0.177802	0.434415	0.166583	0.174399	0.113141	0.11665	0.166109	0.25088	0.0805405	0.170836	0.159778	0.187256	0.158941	0.201231	0.184303	0.127862	0.238509	0.17636	0.145278	0.0632223	-0.0883964	-0.0685226	0.0570437	0.0576915	0.000272763	0.0714327	-0.0733862	-0.0265627	-0.0852518	-0.242772	0.286495	-0.074726	-0.331578	0.0326809	0.620869	0.10246	0.0308277	-0.0455668	0.137812	0.165649	-0.547645
14897	b0772	predicted pectinesterase (NCBI)	-0.0316278	-0.169327	-0.193637	-0.0994894	-0.257636	-0.456133	0.0120472	-0.0918695	0.0544623	0.0614386	0.0611752	0.00299558	0.0648568	0.0538791	0.0848467	-0.107319	0.0460568	0.0735007	0.226374	0.0583006	0.028477	0.0916766	-0.0250024	0.0396344	0.0758401	0.0277789	-0.251944	0.0316331	0.000421115	0.0016603	0.0304162	-0.030233	0.0779456	0.0753817	-0.414949	0.399828	-0.307421	-0.00292666	0.147986	-0.0048502	-0.0850424	1.22676	0.125258	-0.170997	-0.19757	0.122207	0.54158
14898	b0773	predicted kinase inhibitor (NCBI)	-0.094492	-0.679749	-1.02505	-1.24537	-1.28117	-0.104527	-0.527179	-0.231061	-0.492213	-0.284625	-0.558899	-0.568244	-0.520643	-0.557964	-0.652501	-0.305691	-0.523517	-0.506776	-0.523542	-0.519571	-0.553367	-0.591304	-0.598106	-0.903295	-0.92892	-0.594121	-0.216348	-1.37591	-0.519107	-0.519967	-0.580254	-0.5666	-0.590977	0.107686	-0.521467	-0.617117	-0.893856	-0.183302	-0.0799548	0.000826889	-0.478803	-0.894044	-0.791939	-0.329272	-0.839113	-1.02031	0.289247
14899	b0774	adenosylmethionine--8-amino-7-oxononanoate transaminase (NCBI)	-0.169683	-0.139091	-0.184862	-0.407216	0.651165	-0.192651	-0.174981	0.00518387	-0.130591	0.176817	-0.197457	-0.191023	0.335291	-0.180705	-0.275142	-0.0586779	-0.145606	-0.128548	-0.14625	-0.139246	-0.173617	-0.211293	-0.220885	-0.154248	-0.335628	0.00470074	0.11073	0.0536019	0.0794833	0.0807354	0.0202141	0.0339593	-0.11495	0.0869998	0.0624553	-0.469706	-0.13974	-0.0670001	0.531329	0.0152719	0.198408	0.204582	-0.0846071	0.63536	0.130795	0.0433739	-0.260764
14900	b0775	biotin synthase (NCBI)	0.11534	0.41983	0.585781	0.149648	0.623029	-0.212959	0.435399	0.463433	0.489815	0.490312	0.422843	0.44465	0.492094	0.455121	0.371235	0.801434	0.490636	0.50799	0.489414	0.499237	0.464462	0.42707	0.414905	0.159284	0.274283	0.343245	-0.0149663	0.417695	0.417869	0.420037	0.359414	0.373231	0.226474	0.761089	-0.0141122	-0.314654	-0.576932	0.247231	-1.80841	0.342966	-0.0677603	-0.0755126	0.291332	0.207266	0.588614	0.575654	-0.89717
14901	b0776	8-amino-7-oxononanoate synthase (NCBI)	-0.0202115	-0.853352	-1.03547	-0.508433	0.0506329	0.15291	-0.832196	-0.958454	-0.799746	-0.804797	-0.854737	-0.871068	-0.822502	-0.863434	-0.488591	-0.120536	-0.828703	-0.801618	-0.828771	-0.819189	-0.744132	-0.393283	-0.563387	-0.345814	0.112453	-0.761273	-1.32763	-1.28627	-0.684698	-0.686646	-0.737109	-0.718302	-0.36593	0.230087	-0.0731275	0.123686	-0.409737	0.21285	-0.270899	0.0816356	-0.303158	-0.857024	-0.758666	-0.847979	-0.785088	-0.940442	-0.888191
14902	b0777	predicted methltransferase, enzyme of biotin synthesis (NCBI)	-0.0293497	0.296996	-0.139565	-0.361077	0.550797	-0.12165	0.472389	-0.108746	0.0439114	0.317798	0.325583	-0.0174699	0.0310491	-0.00970672	-0.0955199	-0.230125	0.0252297	0.0524986	0.0247994	0.0361338	0.00660052	-0.0404491	-0.045496	-0.353426	-0.16684	0.0163099	-0.483668	0.0656184	-0.118802	-0.119853	-0.170416	0.112166	-0.309948	-0.438866	-0.702266	-0.352449	-0.305083	-0.399919	-0.036036	0.189553	-0.174981	-0.285726	-0.188236	-0.276545	-0.664194	0.0928256	-0.468375
14903	b0778	dethiobiotin synthetase (NCBI)	0.00222554	0.801866	0.746994	0.521624	0.0721776	1.03512	1.2724	1.21531	1.34111	1.36778	1.28577	1.32517	1.3673	1.33341	1.248	1.11417	1.36957	1.39773	1.36739	1.38724	1.3565	1.31032	1.29751	1.00722	1.18857	1.31777	1.27923	0.531342	1.39033	1.39616	1.33364	1.36412	1.57132	1.20177	1.22815	0.234996	0.0879719	0.962674	-0.134307	0.041419	1.10753	1.09252	1.15493	1.10506	0.713009	1.1729	-0.558963
14904	b0779	excinuclease ABC subunit B (NCBI)	-0.111174	0.090422	0.0769069	-0.36201	0.130692	-0.122693	0.134808	0.0357813	0.293377	0.189916	0.123932	0.136662	0.17989	0.160168	0.192486	0.127252	0.187781	0.221561	0.178321	0.198424	0.449712	0.173048	0.183447	-0.203136	-0.145428	0.246755	0.154812	-0.260011	0.215275	0.21689	0.154838	0.249373	0.0260344	-0.0263017	0.0387554	0.272891	-0.410028	0.15838	-0.776977	-0.189196	0.0295079	0.145995	0.216071	-0.000438087	0.16819	0.0417303	-0.118608
14905	b0780	predicted transferase with NAD(P)-binding Rossmann-fold domain (NCBI)	-0.199968	-0.170845	-0.223381	-0.119807	-1.20096	-0.0982781	0.204877	0.104609	0.250776	0.258639	0.193562	0.204487	0.247727	0.228044	0.127299	-0.0118571	0.255468	0.2892	0.2461	0.265737	0.225378	0.179555	0.581487	0.475415	0.697801	0.170082	-0.396609	-0.496089	0.246183	0.248677	0.186526	0.21671	4.29951	-0.0653885	-0.30791	0.169709	-0.657518	-0.153396	-0.365938	-0.20622	-0.0674892	0.0199246	0.00712527	-0.0697451	0.140729	0.142148	0.827887
14906	b0781	molybdenum cofactor biosynthesis protein A (NCBI)	-0.345318	-0.487225	-0.770929	-0.922865	-0.806719	-0.282567	-0.881783	-0.584837	-0.849599	-0.853543	-0.906676	-0.643555	-0.873027	-0.893031	-0.993953	-0.711391	-0.866129	-0.832787	-0.874731	-0.858814	-0.672645	-0.944863	-0.925017	-0.500132	-0.723692	-0.560525	-0.909451	-1.08587	-0.484113	-0.48451	-0.546338	-0.516276	-0.608584	-0.521313	-0.629568	-0.255806	-0.341586	-0.242157	0.219516	0.19866	-0.620436	-0.665575	-0.499957	-0.58417	-0.662935	-0.736121	-1.46956
14907	b0782	molybdopterin biosynthesis protein B (NCBI)	0.0231325	0.997139	0.949753	0.730556	0.741734	1.02821	0.969602	0.888221	1.02556	1.04199	0.968228	0.994048	1.03722	1.01774	0.917112	0.776926	1.04557	1.07958	1.03566	1.05794	1.01719	0.971629	0.985669	0.65737	1.69512	1.09713	1.20686	0.325364	1.17144	1.17504	1.11103	1.12822	0.979164	1.4215	0.310423	0.274613	0.159591	0.736828	-1.07685	0.194563	1.12916	1.1201	1.19113	1.13481	0.735613	0.246523	-0.417271
14908	b0783	molybdenum cofactor biosynthesis protein C (NCBI)	-0.249951	0.682309	0.627149	0.41081	-0.291856	0.0561704	0.884226	0.81964	0.950118	0.973197	0.888684	0.93519	0.978235	0.958999	0.87168	1.03101	1.00705	1.09544	0.979662	1.00384	0.990085	0.917291	0.943693	0.60091	0.591678	0.573222	0.00264803	0.285766	0.647443	0.653857	0.589525	0.65067	0.501187	0.460458	-0.162995	0.913214	0.406075	1.02436	0.343142	-0.32433	0.986665	0.965601	1.09734	1.02459	0.761173	0.973067	-0.570732
14909	b0784	molybdopterin synthase, small subunit (NCBI)	-0.121326	-0.124457	-0.160944	0.356966	-0.920518	-0.344857	-0.0619524	-0.184827	-0.0257866	-0.0307473	-0.0867566	-0.0909698	-0.0476571	-0.0674439	-0.155142	-0.307179	-0.0212857	-0.00696587	-0.0466297	-0.0324874	-0.044503	-0.118221	-0.0826248	-0.430522	-0.456678	-0.426744	-0.563933	-0.755009	-0.346773	-0.348146	-0.411986	-0.390495	-0.545031	-0.66594	0.357694	-0.802105	-0.873617	-0.355867	0.113109	-0.0522143	1.12723	0.0246059	0.103931	0.0359213	-0.366097	0.282956	0.292522
14910	b0785	molybdopterin synthase, large subunit (NCBI)	-0.615559	-1.28073	-1.31198	-0.850019	-1.51897	-0.848173	-0.925567	-1.07609	-0.909083	-0.923254	-0.964699	-0.991395	-0.947971	-0.968064	-1.05594	-0.744134	-0.941888	-0.908873	-0.954411	-0.947613	-0.577479	-1.02258	-0.983192	-1.33344	-1.36277	-1.06823	-0.0310208	-0.438796	-0.988002	-0.991019	-1.05468	-0.414794	-1.18762	-1.30821	-1.38615	0.731393	-0.286432	-0.755531	-1.0894	0.184655	-0.785722	-1.02247	-0.924291	-0.749237	-0.859501	-0.412853	0.0175908
14911	b0786	predicted inner membrane protein (NCBI)	0.0642195	-0.625709	-0.237071	-0.674522	0.437072	-0.142741	-0.374246	-0.431028	-0.341319	-0.173781	-0.397251	-0.198179	-0.352617	-0.262029	-0.460198	0.0990333	-0.345141	-0.311554	-0.253143	-0.346501	-0.348382	-0.422035	-0.191903	-0.302429	-0.102348	-0.178301	-0.11658	-0.368201	-0.281039	-0.280045	-0.34415	-0.063888	0.00944496	-0.0680664	0.076736	0.528087	0.166156	0.267492	-0.553922	0.193439	-0.411078	-0.391216	-0.339636	-0.231151	0.158097	-0.043141	0.692198
14912	b0787	conserved inner membrane protein (NCBI)	0.317189	3.12837	3.08015	2.85571	1.85214	2.75601	2.71428	2.76179	2.83253	2.91212	2.77557	2.91726	2.95981	2.94192	2.8554	2.70281	2.97364	3.01008	2.95442	2.99412	2.98802	2.91707	2.92638	2.59411	2.56734	3.29194	2.91583	2.49967	3.36055	3.37834	3.31237	3.3353	3.18456	3.0539	2.48815	2.05963	1.59314	2.40474	1.02344	-0.0201891	2.8147	2.79854	2.80048	2.81752	2.53137	2.73548	0.437371
14913	b0788	conserved inner membrane protein (NCBI)	-0.162765	-0.0319787	0.595141	-0.305588	0.571392	-0.0321104	0.824035	0.25492	0.385792	0.408928	0.335341	0.394761	0.416333	0.398869	0.316834	0.154065	0.444535	0.460004	0.416958	0.442181	0.428836	0.547684	0.914733	0.0390363	0.0279847	0.0265275	-0.42847	-0.0155387	0.1004	0.103101	0.0391858	0.0725698	0.187959	0.702462	-0.425744	-0.188653	0.955047	0.065024	-0.800251	-0.573898	-0.0104055	-0.108222	-0.0307892	0.451208	0.109647	0.0858871	0.587666
14914	b0789	cardiolipin synthase 2 (NCBI)	0.320271	1.08831	0.824778	0.60615	0.494078	0.344029	0.765764	0.912496	0.805961	0.816207	0.755859	0.790047	0.811774	0.794263	0.712092	0.763537	0.838384	0.85324	0.811993	0.831255	0.819263	0.764467	0.776453	0.432332	0.421868	0.763764	0.547115	-0.00824033	0.837379	0.840486	0.776528	0.810047	0.646922	0.89271	-0.0307896	0.71042	0.116307	0.970685	-0.475877	0.367635	0.589499	0.569296	0.64232	0.583715	0.792942	0.573972	-0.67782
14915	b0790	predicted DNase (NCBI)	-0.132135	-0.137228	-0.417308	-0.110659	-0.402059	-0.983453	-0.215455	0.771099	-0.182955	-0.182422	-0.238874	-0.239306	-0.196015	-0.212956	-0.295348	-0.0723648	-0.188666	-0.155131	2.63285	-0.190445	-0.19222	-0.246606	-0.231102	-0.577597	-0.605447	-0.374764	-0.365103	-1.14637	-0.302904	-0.304007	-0.367876	-0.346426	-0.495201	-0.340762	-0.116579	0.302448	-0.335226	-0.377466	0.494499	-0.215814	-0.224721	-0.610755	-0.520205	-0.600004	-0.606966	-0.386702	-0.905655
14916	b0791	predicted inner membrane protein (NCBI)	-0.24137	0.539911	0.500914	0.287894	0.0861996	-0.0672724	0.82284	0.745412	0.878261	0.898843	0.82217	0.856979	0.900094	0.883796	0.801739	0.640557	0.908864	0.943082	0.893986	0.912277	0.909684	0.855998	0.865565	0.507484	1.03312	1.46334	1.10792	0.681642	1.53364	1.54169	1.4768	1.49896	1.34921	1.22028	0.636849	0.602429	0.817128	0.944748	-0.942763	-0.229345	1.19279	1.2142	1.36859	1.34375	0.808946	0.589341	-1.15945
14917	b0792	predicted transporter subunit: membrane component of ABC superfamily (NCBI)	-0.192726	0.117656	0.0801074	-0.13134	-0.523994	-0.479792	0.496273	0.392679	0.538176	0.546512	0.482238	0.495257	0.538484	0.521865	0.439622	1.06288	0.546299	0.580084	0.532268	0.807591	0.811835	0.490338	0.503687	0.15899	0.131308	0.510947	0.0630454	0.0685168	0.582306	0.584458	0.520227	0.541898	0.392697	0.524049	-0.284237	0.174624	0.766099	-0.095294	0.279488	0.126447	0.289108	0.280654	0.362675	0.865922	-0.11	0.382376	-0.9409
14918	b0793	predicted transporter subunit: membrane component of ABC superfamily (NCBI)	0.0225017	0.581533	0.559596	0.245934	0.212329	0.00950004	0.371031	0.263146	0.41064	0.417088	0.354713	0.364493	0.407735	0.391045	0.308769	0.432717	0.415436	0.449162	0.401522	0.415108	0.413183	0.359018	0.487945	0.204296	0.366652	0.605574	0.578721	0.0288627	0.676815	0.679302	0.615033	0.636764	0.54487	0.484111	0.44309	0.256681	0.902596	0.134028	0.149856	0.10475	0.393079	0.37292	0.626272	0.81147	0.562931	0.262805	-0.118059
14919	b0794	putative ATP-binding component of a transport system (VIMSS)	-0.0398177	0.453736	0.404679	0.411026	0.59934	0.520972	0.624865	0.41841	0.735034	0.572221	0.507293	0.521444	0.564664	0.548063	0.729626	0.556533	0.590486	0.606334	0.558454	0.572808	0.570799	0.516721	0.575899	0.302994	0.548924	0.480347	0.103968	0.0552295	0.559917	0.682713	0.497065	0.51873	0.369784	0.304826	-0.0488362	0.586077	-0.145066	0.330106	0.270599	0.422523	0.771866	0.58051	0.526249	0.519063	0.44372	0.436859	0.61606
14920	b0795	hypothetical protein (NCBI)	0.0698733	-0.785299	-0.833708	-0.592562	0.30743	-0.701548	-0.990382	-0.885992	-0.961799	-0.963961	-0.49419	-1.02236	-0.979053	-0.680226	-0.881443	-0.669774	-0.971792	-0.938312	-0.985219	-0.973965	-0.8291	-0.812944	-0.851305	-1.35735	-1.01268	-1.10791	-1.09117	-0.573959	-1.02789	-1.0273	-1.09136	-0.912163	-1.16031	-0.635142	-0.548443	-0.387801	-0.996166	-1.23495	-0.570244	-0.00775488	-1.07188	-0.875029	-1.14533	-0.937814	-0.456631	-0.794792	-1.57575
14921	b0796	putative transcriptional regulator (VIMSS)	-0.218833	-0.530245	-0.563628	-0.771383	0.168368	0.309361	-0.364076	-0.501839	-0.34002	-0.34745	-0.395772	-0.41056	0.096721	-0.384238	-0.46672	-0.169575	-0.360557	-0.327313	-0.373529	-0.364549	-0.365789	-0.420412	0.0603441	-0.746239	-0.781008	-0.24317	-0.0348471	-0.99892	-0.163146	-0.16474	-0.228554	-0.20709	-0.355675	-0.482529	-1.02621	0.0224639	-0.466402	0.820068	-0.453685	-1.05532	-0.408671	-0.426789	-0.348944	-0.416644	-0.0343501	0.619906	-1.1775
14922	b0797	RNA helicase (NCBI)	0.0387132	-0.646234	-0.680243	-0.610958	-0.589331	-0.735414	-0.44653	-0.30476	-0.420275	-0.42556	-0.476076	2.98576	-0.443612	3.27804	3.0125	-0.0859213	-0.436772	-0.403447	-0.449901	-0.440146	-0.441545	-0.496104	-0.248068	-0.264639	-0.630565	-0.379455	-0.935129	-1.06144	-0.299513	-0.299523	-0.363515	-0.342032	-0.445707	-0.0763951	-0.27162	-0.167082	-0.0842784	-0.898875	-0.404043	0.235613	-0.528975	-0.760824	-0.442088	-0.750642	-0.370039	-0.504238	0.0105236
14923	b0798	hypothetical protein (NCBI)	0.262351	0.866803	1.3036	0.620546	-0.373909	0.27593	1.32728	1.25475	1.38544	1.40796	1.32937	1.3673	1.4104	1.39423	1.31223	1.14712	1.41922	1.45349	1.40425	1.423	1.42044	1.36683	1.37599	1.03812	1.00344	0.908419	0.352313	0.149099	0.987773	0.989811	0.925594	0.947366	0.798466	0.671039	0.501246	1.05926	0.0655499	0.659971	0.367591	0.851833	1.29519	1.04404	1.09056	1.05725	0.653315	1.20514	-1.07326
14924	b0799	ATP-dependent DNA helicase (NCBI)	-0.0383276	-0.0407277	-0.0711026	-0.296251	1.24177	-0.0583239	-0.242058	-0.369469	-0.212158	-0.213517	-0.267165	-0.111667	-0.234766	-0.248502	-0.336237	-0.162905	-0.234589	-0.207387	-0.237613	-0.232226	-0.253539	-0.299483	-0.224298	-0.56142	0.0836578	-0.0111967	-0.264252	-0.262487	-0.15938	-0.111481	-0.220471	-0.149361	-0.0534138	-0.247336	-0.0855529	0.117731	0.0809857	0.31567	0.501324	0.315179	-0.0965887	-0.0713893	-0.0410056	0.0968331	0.241579	-0.393565	0.816942
14925	b0800	hypothetical protein (NCBI)	0.133757	-0.491948	-0.526777	-0.571898	-1.1127	-0.792834	-0.290564	-0.159542	-0.259343	-0.259178	-0.327825	-0.326622	-0.306777	-0.316306	-0.393661	-0.404199	-0.278722	-0.251452	-0.282425	-0.277211	-0.297368	-0.147319	-0.356474	-0.656038	-0.691237	-0.249651	-0.0347965	-0.0495148	-0.158153	-0.158776	-0.207437	-0.183733	-0.345147	0.0247776	0.151596	0.553959	0.322288	-0.214704	-0.163542	-0.119926	-0.495046	-0.266552	-0.439718	-0.127864	0.445139	-0.688296	0.00841894
14926	b0801	predicted dehydrogenase (NCBI)	0.105036	0.0875657	0.162009	0.091385	-0.326013	-0.501051	-0.0708846	-0.195947	-0.039709	-0.040079	-0.108147	-0.10822	-0.0883657	-0.0978519	-0.162067	-0.332511	-0.0604424	-0.0332119	-0.0640695	-0.0592461	0.147806	-0.125094	-0.138016	-0.437582	-0.472682	-0.219936	-0.244193	-0.284775	-0.128391	-0.129693	-0.178278	-0.154588	-0.315828	-0.0719361	-0.117435	0.447119	-0.476825	0.476743	0.227427	-0.512755	-0.00534704	0.218924	0.0536905	0.105016	0.0451614	0.0981381	-0.846286
14927	b0802	hypothetical protein (NCBI)	-0.17069	0.141797	0.0991108	-0.10397	-0.0126784	-0.454404	0.308635	0.16722	0.339485	0.357838	0.291597	0.309625	0.324837	0.318224	0.256402	0.0851508	0.347781	0.373112	0.345351	0.348973	0.341728	0.29602	0.27957	0.80512	-0.0537373	0.0850917	0.191926	-0.641812	0.175873	0.175657	0.129395	0.147108	-0.0119435	-0.124478	0.554709	-0.901275	1.48535	0.424798	-2.23886	-2.1712	-0.061204	-0.0701509	-0.00987827	-0.085126	0.365366	0.189756	0.311685
14928	b0803	hypothetical protein (NCBI)	0.228891	0.200225	0.161136	0.384061	-0.610275	0.207811	0.0735106	-0.0851401	0.0966472	0.105609	0.0489302	0.0505436	0.0624051	0.0586274	-0.00331093	-0.17378	0.0875389	0.112531	0.0857711	0.0861492	0.0794849	0.0334866	0.0200141	-0.282003	-0.314746	0.286696	0.221884	-0.127569	0.0995663	0.10003	0.0571843	0.0759386	0.956591	-0.195403	0.599066	-0.928049	0.499705	-0.503581	-1.41449	0.177044	0.324857	0.415701	-0.0370205	-0.120384	0.608236	0.294571	0.550963
14929	b0804	putative enzyme (VIMSS)	-0.145881	-0.592199	-0.632666	-0.197012	0.246793	-0.572165	-0.789819	-0.950283	-0.768047	-0.759225	-0.121918	-0.813798	-0.801946	-0.805862	-0.867836	-0.402132	-0.776626	-0.751595	-0.778464	-0.777702	-0.784609	-0.830627	-0.844478	-1.14678	-1.17975	-0.62983	-0.784045	-1.36087	-0.544444	-0.543857	-0.586718	-0.568047	-0.727267	-0.492094	-0.724928	-1.62321	-0.192689	-0.825137	0.152999	-0.555027	-0.789071	0.101068	-0.308325	-0.0775713	-1.19143	-0.16598	1.40393
14930	b0805	predicted iron outer membrane transporter (NCBI)	0.0799766	0.0488258	0.145199	0.0436451	0.130017	0.107865	0.163854	0.149987	0.191835	0.205376	0.144035	0.153924	0.165742	0.202893	0.237613	-0.0703903	0.272937	0.216441	0.18918	0.191183	0.184226	0.138373	0.12341	0.266609	0.0472345	0.0918998	-0.141428	0.11472	0.177075	0.178082	0.135176	0.190552	0.29561	-0.00373457	-0.139521	-0.451941	-0.674239	-0.0208234	-0.490897	0.369643	-0.0241562	-0.0260397	-0.0276869	0.0539517	-0.29307	0.16252	-0.209302
14931	b0806	orf, hypothetical protein (VIMSS)	-0.215902	-0.480802	-1.33142	-1.45572	0.690105	-0.718953	-0.978361	-1.13738	-0.967049	-0.976897	-1.00754	-1.04213	-1.03013	-1.01264	-0.239457	-1.13552	-1.02003	-0.995667	-1.02068	-1.02471	-0.266776	-1.03976	-1.05146	-0.00730997	-1.27942	-1.16435	-0.737231	-1.67387	-1.1029	-1.10568	-1.14817	-1.11488	-0.284214	-1.28963	-0.896746	-0.546627	-1.73381	0.351105	0.857321	0.588365	-1.1386	-1.14473	-1.07595	-0.42531	-1.37576	-0.891489	-0.0392032
14932	b0807	orf, hypothetical protein (VIMSS)	-0.167979	-0.850218	-1.08148	-0.999654	-1.77019	-0.718445	-0.900551	-0.316581	-0.869246	-0.0505458	-0.435805	-0.937637	-0.922746	-0.927406	-0.699909	-0.872822	-0.900857	-0.875996	-0.902365	-0.893776	-0.37166	-0.867084	-0.849605	-1.26829	-0.739455	-0.874019	-1.03143	-1.07754	-0.791481	-0.791687	-0.83446	-0.815787	-0.96089	-0.636542	-0.42009	-0.845679	-0.307358	0.70693	-0.684566	-0.066985	-0.423118	-0.891402	-0.813744	-0.572251	-0.403504	-0.908326	0.416191
14933	b0808	putative transport protein (VIMSS)	0.120433	0.139036	0.303696	0.0757105	0.102077	-0.145159	0.0632488	0.351104	0.110552	0.114843	0.469886	0.187924	0.0824679	0.0780946	0.0454086	0.255247	0.105539	0.13091	0.103033	0.241845	0.0997472	0.142752	0.133845	-0.131413	-0.159917	0.263366	-0.192524	-0.263831	0.201371	0.205309	0.28333	0.180937	0.269759	0.103786	0.112367	0.437562	0.0601932	0.120899	-0.20515	0.150434	-0.0398916	0.152798	0.168538	0.0285595	0.18858	0.00889237	0.351987
14934	b0809	glutamine ABC transporter ATP-binding protein (NCBI)	-0.00514223	-0.430793	-0.886943	-0.637383	0.76275	-0.525064	-0.646568	-0.757138	-0.603702	-0.602875	-0.658811	-0.664289	-0.654635	-0.0484148	-0.723459	-0.404911	-0.621414	-0.594095	-0.62521	-0.61952	-0.617066	-0.685662	-0.363611	-0.998995	0.243115	-0.890087	-0.235491	-0.564479	-0.807477	-0.807518	-0.850309	-0.831679	-0.101394	-0.437682	-0.638236	-0.473081	-0.454467	-0.764826	-0.716881	-0.874255	-0.759716	-0.768422	-0.696743	2.05669	-1.14967	-0.318087	-0.885973
14935	b0810	glutamine ABC transporter permease protein (NCBI)	0.0411572	-0.321378	-0.353748	0.170996	-0.737706	0.0635361	-0.153333	-0.262685	-0.109498	-0.108729	0.239473	-0.170709	-0.161044	-0.165501	-0.229697	-0.071811	-0.128016	-0.100737	-0.131736	-0.126448	0.0052136	0.297202	-0.205671	-0.504984	-0.535257	-0.281221	-0.608965	-0.68751	-0.198854	-0.197941	-0.240838	-0.22209	-0.36734	-0.208255	-0.100337	-0.408364	-0.15504	-0.840569	0.0455153	0.296218	-0.251553	-0.351532	-0.384765	-0.454555	-0.396759	-0.169228	-1.68344
14936	b0811	glutamine ABC transporter periplasmic protein (NCBI)	-0.065514	-0.296038	0.54454	0.0569273	-0.137494	-0.583731	-0.251012	-0.360854	-0.211386	-0.205959	0.179232	-0.258692	-0.249307	-0.243967	-0.314611	0.0236304	-0.207633	-0.178245	-0.224289	-0.215887	-0.215085	-0.264178	-0.112017	-0.595975	-0.363949	-0.18088	-0.343073	0.0589437	-0.093013	-0.0917527	-0.139246	0.052128	-0.104339	-0.392572	-0.469042	-0.457027	-0.329407	-0.300534	-0.283535	-0.195862	-0.297681	-0.37012	-0.303222	0.475652	-0.453267	-0.144648	0.557661
14937	b0812	DNA protection during starvation conditions (NCBI)	0.0739821	-0.206182	-0.0627519	0.064264	-0.454644	0.183627	-0.241659	-0.354661	-0.19874	-0.198644	-0.2538	-0.261113	-0.251443	-0.255997	-0.320226	-0.102663	-0.218411	-0.191154	-0.222088	-0.217011	-0.237082	-0.282994	-0.296163	-0.343397	-0.463261	-0.0270071	0.059118	-0.428047	0.0582045	0.0591168	0.0111936	0.0349819	-0.110231	0.0370693	-0.1463	-0.386931	0.307161	-0.602315	-0.8391	-0.0494879	-0.378725	-0.394215	-0.322919	-0.196602	-0.186949	-0.0115833	-0.0249189
14938	b0813	threonine and homoserine efflux system (NCBI)	-0.0775612	-0.0718254	-0.196947	-0.337424	0.101292	-0.260554	0.0383273	0.250835	0.219606	0.0867019	0.0214697	0.102839	0.0507309	0.123809	0.169921	0.211756	0.0767612	0.102119	0.0742853	0.165131	0.0709076	0.025134	0.00840958	0.351554	-0.118827	0.0973179	0.364211	-0.236053	0.20127	0.201374	0.152647	0.181873	0.0270989	0.0445427	0.132418	0.691241	-0.494219	0.425479	0.180324	-0.180991	0.18293	0.30764	0.188642	0.153327	0.451865	-0.0688915	0.557651
14939	b0814	outer membrane protein X (NCBI)	-0.304559	1.59735	1.51022	1.09642	0.732986	0.77732	1.58075	1.49851	1.6456	1.6901	1.59275	1.66188	1.65941	1.66469	1.59055	2.09152	1.69177	1.71713	1.69166	1.70982	1.70136	1.65546	1.62565	1.56499	1.29169	1.2926	0.780913	0.971544	1.39744	1.40479	1.35369	1.37627	1.29603	1.09032	0.946347	2.25922	0.864736	1.50908	0.776397	0.662338	2.00428	1.9371	1.93716	1.91382	1.56378	1.21038	1.35166
14940	b0815	predicted hydrolase, inner membrane (NCBI)	0.102323	0.529011	0.517869	0.353297	0.049964	0.371585	0.427536	0.301896	0.448282	0.477969	0.416145	0.28088	0.278529	0.283194	0.43065	0.486811	0.310091	0.335011	0.310853	0.324869	0.316693	0.481413	0.244206	0.124741	0.322657	0.363638	0.102551	0.538259	0.468841	0.474706	0.423756	0.446167	0.30032	0.375864	0.306516	0.438979	0.291738	0.364815	0.0910697	0.104685	0.430241	0.252443	0.285047	0.219161	0.790455	0.607808	0.473637
14942	b0817	DNA-binding transcriptional regulator of mntH (NCBI)	-0.127833	0.416573	0.436668	0.405666	-0.629663	-0.788639	-0.269603	-0.401109	-0.218733	-0.21019	0.570537	-0.253508	-0.241792	-0.24549	-0.320424	-0.460605	-0.215193	-0.18963	-0.218068	-0.198849	0.156474	-0.265633	-0.284169	-0.0102656	-0.0629877	-0.0495606	0.137369	0.319068	0.0581372	0.070105	0.0200129	0.0395363	-0.0990609	-0.241446	0.173844	-0.981198	-1.09472	-0.592437	0.957664	0.690083	-0.154229	-0.167566	-0.131622	-0.201242	0.390436	0.00990016	-0.656558
14943	b0818	predicted transporter (NCBI)	0.205259	0.822712	0.898361	1.14729	0.565886	0.466144	0.781004	1.11357	0.847476	0.869697	0.780264	0.869775	0.874231	0.84515	0.827709	0.916198	0.875976	0.90202	0.87216	0.895993	0.995764	0.829133	0.830835	0.651229	0.518779	0.786582	0.880469	0.410988	0.894628	0.897325	1.03806	0.870551	0.722608	0.740484	0.424894	0.889167	0.723453	0.630174	0.641825	-0.0768772	0.975595	0.956808	0.987782	0.928803	0.770781	0.666653	-0.37855
14944	b0819	hypothetical protein (NCBI)	0.0031036	-0.198334	-0.320487	-0.500056	-0.618459	-0.453689	-0.131626	-0.226066	-0.0928008	-0.0617068	1.17338	-0.15089	-0.139041	-0.0230037	-0.217821	-0.147504	-0.113798	-0.0887529	-0.115668	-0.101427	-0.121438	-0.168537	-0.149614	-0.315585	-0.187185	-0.0513744	0.315244	-0.192574	0.0556506	0.0560553	0.029923	0.442035	0.0189255	-0.0623638	0.0201336	-0.0978445	-0.334559	-0.519504	0.0580028	-0.167287	-0.482749	-0.554883	-0.452547	-0.459433	-0.332351	-0.018353	-0.47567
14945	b0820	fused predicted transporter subunits of ABC superfamily: ATP-binding components (NCBI)	-0.116227	0.00444497	-0.176144	-0.319525	-0.360065	-0.334656	-0.0765135	-0.0215783	-0.0272378	-0.0209118	0.0365148	-0.0782506	-0.0686434	-0.0730579	-0.0132141	-0.289806	0.0121412	-0.00753867	-0.0392003	-0.0303627	-0.0295054	-0.098074	-0.0124023	-0.411909	-0.0953174	0.0487918	-0.344331	0.0449862	0.158684	0.158669	0.109955	0.129241	0.100958	-0.143441	-0.407718	-0.0715335	-0.712499	-0.192709	0.164103	-0.195049	0.0498358	-0.00631562	-0.0526577	-0.14084	0.0461845	0.0488075	0.00427498
14946	b0821	hypothetical protein (NCBI)	0.240249	0.0515578	0.0185887	-0.357912	-0.581105	-0.432293	-0.300717	-0.429036	-0.269355	-0.207694	-0.0156477	-0.331782	-0.322313	-0.317092	-0.387838	-0.153747	-0.281438	-0.252378	-0.297455	-0.284179	-0.285691	-0.34017	-0.340367	-0.67196	-0.410564	0.277837	-0.704623	-0.751506	-0.0926932	-0.0922588	-0.140129	-0.103776	-0.0630377	-0.138691	-0.128544	-0.674718	-0.046355	-0.638887	-0.152279	0.0992177	-0.556036	0.0332669	-0.50067	-0.440764	-0.939824	-0.285652	1.18416
14947	b0822	predicted hydrolase (NCBI)	0.135935	0.261511	0.221577	0.715076	0.706177	0.00326895	0.40158	0.298755	0.446211	0.455197	0.389129	0.404606	0.431515	0.86259	0.348922	0.188438	0.455754	0.485225	0.438931	0.456142	0.454045	0.399957	0.412987	0.0682973	0.0146288	0.680304	0.174192	0.274619	0.790849	0.795447	0.747114	1.1408	0.611481	0.493107	0.340492	0.585299	0.647203	-0.462113	-1.08122	0.130248	-0.0394288	-0.0475236	0.0132083	-0.0670896	0.622117	0.622569	2.01157
14948	b0823	predicted pyruvate formate lyase (NCBI)	-0.0238524	-0.0854004	-0.115541	-0.0206023	-0.513613	0.0753855	0.0872974	-0.07435	0.132421	0.310813	0.438728	0.113377	0.105721	0.250666	0.095343	0.240757	0.129674	0.159017	0.123175	0.129105	0.1606	0.0729882	0.239218	-0.215907	0.139809	-0.132607	-0.0954534	0.258011	-0.0216004	-0.0203269	-0.0682906	-0.0147469	-0.0227768	0.025002	-0.0141556	-0.210686	-0.00535791	0.0174615	0.375	-0.333636	-0.142985	-0.108503	0.0202701	0.129426	-0.144094	0.112036	0.102509
14949	b0824	predicted pyruvate formate lyase activating enzyme (RefSeq)	0.00620753	-0.973887	-1.27011	-1.24531	-0.839939	-1.16907	-0.53064	-1.21983	-1.04933	-1.06113	-1.10609	-0.985772	-1.10316	-1.1157	-1.02985	-0.776232	-1.08066	-1.06038	0.147583	-1.08614	-0.912476	-0.876746	-1.12211	-1.28116	-1.27655	-0.888154	-1.5398	-1.41545	-0.93163	-0.935339	-0.983641	-0.964557	-0.911473	-0.651407	-1.21892	0.0623087	0.00739638	-0.483882	0.137243	-0.0689037	-0.968637	-1.19842	-1.12615	-1.02426	-0.195067	-0.75654	-2.07586
14950	b0825	putative transaldolase (VIMSS)	-0.333113	-2.09894	-1.37776	-2.31646	-3.32394	-1.83719	-1.58557	-1.7853	-1.56168	-1.57782	-1.63143	-1.64879	-1.63919	-1.64907	-1.71351	-1.8842	-1.61253	-1.58586	-1.61505	-1.61423	-1.62504	-1.17105	-1.6575	-1.99031	-2.03999	-1.92441	-2.41935	-2.61521	-1.81614	-1.81987	-1.21163	-1.85054	-2.00165	-1.42867	-1.87463	-0.631478	-2.61251	-2.27714	0.835257	-0.876768	-1.86135	-1.85232	-1.78372	-1.88312	-1.37377	-1.60635	0.65699
14951	b0826	molybdopterin biosynthesis protein MoeB (NCBI)	-0.149672	-0.419926	-0.164315	0.372684	0.0374617	0.40105	-0.357191	-0.228139	0.0225528	-0.0814339	-0.383074	-0.367544	-0.171549	-0.122589	-0.216705	0.120803	-0.329924	-0.302606	-0.333719	0.0285615	-0.238741	-0.0125468	-0.376153	-0.192685	-0.125996	1.98821	1.81211	0.53278	0.0316503	0.0319647	-0.0183569	0.00108962	-0.000195685	0.816211	0.494539	-0.606894	0.1827	0.0163435	-1.20712	0.00407342	-0.227308	0.153612	0.0905265	-0.249173	-0.10513	-0.257825	-1.21872
14952	b0827	molybdopterin biosynthesis protein (NCBI)	-0.350874	0.642904	0.577466	0.348286	0.512842	0.489485	0.896713	0.807685	0.975329	1.01409	0.900081	1.05944	1.00072	0.992095	0.92853	0.757083	1.13365	1.06243	1.02583	1.05161	1.0362	0.98226	1.05107	0.823442	0.614973	0.803451	0.495506	0.528894	0.910654	0.914946	0.864181	0.883835	0.904093	0.612884	0.125666	-0.312771	0.9919	1.03904	0.11362	-0.0789002	0.231553	0.23598	0.264061	0.415125	-0.00594173	0.935081	-0.668311
14953	b0828	L-asparaginase (NCBI)	-0.0142936	1.32782	0.592194	0.432012	0.743511	0.832747	0.468748	0.790394	0.53719	0.574678	0.464075	0.535741	0.545127	0.532604	0.464201	0.306322	0.569964	0.596095	0.565977	0.590649	0.56873	0.522561	0.500863	0.206627	0.157818	0.681418	0.30832	-0.0306673	0.789387	0.800685	0.747432	0.755836	1.15227	1.06137	-0.0946534	0.378328	0.700706	0.89485	-0.023557	-0.287464	0.39843	0.398303	0.43053	0.376519	0.505443	0.396884	-0.170434
14954	b0829	fused predicted peptide transport subunits of ABC superfamily: ATP-binding components (RefSeq)	0.050179	0.403486	0.401984	0.243148	-0.55676	-0.0314114	0.37408	0.234952	0.429522	0.441831	0.701724	0.392498	0.401846	0.392546	0.328476	0.170413	0.430802	0.456685	0.426333	0.436668	0.424279	0.368881	0.383994	0.224269	0.294057	0.506187	0.0563601	0.128566	0.614834	0.617787	0.565472	0.573643	0.419832	0.484099	0.0266727	0.139513	-0.164414	0.526418	-0.334035	0.135521	0.853216	0.437688	0.482471	0.673652	1.09747	0.553387	-1.14923
14955	b0830	predicted peptide transporter subunit: periplasmic-binding component of ABC superfamily (NCBI)	-0.00186552	-0.0882215	-0.151334	-0.378734	-0.0473814	-0.510976	0.0903312	0.124265	0.15258	0.172775	0.0775261	0.265312	0.139882	0.385635	0.0666494	0.460734	0.169768	0.196015	0.164596	0.178457	0.165294	0.110175	0.122038	-0.0796306	0.173914	0.0572107	-0.308111	-0.302661	0.165916	0.170583	0.118074	0.540386	0.29873	0.0846878	0.147662	0.158922	-0.12302	0.599742	0.257164	0.268442	0.190669	0.183535	0.217392	0.408529	0.128953	0.143468	0.363194
14956	b0831	predicted peptide transporter subunit: membrane component of ABC superfamily (NCBI)	0.334249	0.233304	0.518849	0.00295136	0.359519	0.695649	0.124933	0.00957725	0.163087	0.167899	0.0910843	0.133689	0.120663	0.126003	0.380469	1.07992	0.160482	0.176388	0.155669	0.553016	0.153895	0.357058	0.119523	-0.00354507	0.185136	0.237007	-0.263141	0.0631684	0.344567	0.34609	0.295634	0.599081	0.566341	0.0893062	0.256514	-0.281156	-0.369781	0.461862	-0.346063	-0.377462	0.248457	0.242295	0.0338191	-0.0427194	-0.114166	-0.191619	-0.932673
14957	b0832	predicted peptide transporter subunit: membrane component of ABC superfamily (NCBI)	0.120484	0.359845	0.602537	0.973271	0.815618	0.411748	0.254194	0.335727	0.303651	0.319741	0.428823	0.294868	0.281726	0.451138	0.635705	0.403757	0.322632	0.338988	0.316943	0.326462	0.480239	0.452315	0.280709	0.208772	0.108443	0.184774	-0.24642	0.523564	0.219767	0.222752	0.17213	0.557917	0.375196	0.240541	0.339567	0.357404	0.648166	0.591119	0.641242	0.216507	0.412751	0.19484	0.22348	0.197046	0.144457	0.255783	0.13036
14958	b0833	conserved inner membrane protein (NCBI)	0.0583535	2.32388	2.27188	2.17156	1.45674	1.92	2.33514	2.35724	2.447	2.51828	2.52603	2.54297	2.53213	2.59292	2.59751	2.43401	2.62784	2.58441	2.55835	2.60524	2.63105	2.56708	2.61105	2.30873	2.35037	2.42328	2.12005	1.93697	2.53131	2.54293	2.49292	2.51984	2.42158	2.29708	1.66373	1.81045	1.6237	2.09225	0.715895	0.177868	2.48578	2.37623	2.36928	2.4047	2.22087	2.28833	1.3058
14959	b0834	predicted diguanylate cyclase (NCBI)	-0.050021	2.74701	2.77308	2.49883	1.83378	2.26904	2.6553	2.60632	2.68566	2.76701	2.62245	2.80015	2.7892	2.87397	2.77372	2.58936	2.81765	2.8428	2.81552	2.86641	2.83453	2.78156	2.81261	2.47293	2.40956	2.91505	2.40955	2.31509	3.00008	3.01618	2.96566	2.98614	2.83497	2.70833	2.16216	1.95323	1.61194	2.42274	0.887373	0.143559	2.71124	2.66792	2.62259	2.68148	2.33044	2.54854	1.69251
14960	b0835	predicted SAM-dependent methyltransferase (NCBI)	0.0552554	0.919873	0.821071	1.04943	0.143511	0.777609	1.00738	1.05702	1.18742	1.09089	0.99451	1.07165	1.05845	1.0643	1.18033	0.846156	1.08831	1.1164	1.09363	1.10547	1.09752	1.02953	1.09065	0.964161	0.703795	1.20868	0.717671	0.492352	1.05481	1.06006	1.00919	1.01507	0.876388	0.841611	0.61151	0.41641	0.647065	0.783908	-0.0828385	0.120977	0.830782	0.910733	0.943341	0.811238	0.598419	0.724742	0.124534
14961	b0836	hypothetical protein (NCBI)	0.181744	0.424442	0.426304	0.202574	-0.789587	0.283703	0.502401	0.817137	0.541864	0.547384	1.16031	0.513494	0.500465	0.505916	0.771619	0.256792	0.528751	0.556154	0.535407	0.540668	0.520792	0.464127	0.482614	0.185735	0.557425	0.0625368	-0.436248	0.38341	0.170271	0.169971	0.119718	0.124036	-0.0281135	0.324936	-0.700892	0.250878	0.411991	1.78194	-0.997705	-0.460698	0.425946	0.421108	0.474137	0.405223	0.0417933	0.303648	-0.153357
14962	b0837	predicted dehydrogenase (NCBI)	-0.00481859	-0.387231	-0.106289	0.00436953	-0.264831	-0.0935586	-0.415802	-0.564994	-0.364158	-0.357815	-0.440926	-0.304399	-0.40513	-0.066922	0.190572	-0.22446	-0.382095	-0.345516	-0.375602	-0.36608	-0.388161	-0.358722	-0.449803	-0.714878	-0.783623	-0.0905631	-0.367932	-0.0748555	0.0182663	0.0208057	-0.0314638	-0.0294571	-0.0178571	0.244443	-0.384576	-0.0832051	0.337958	-0.307835	-0.0990146	-0.22974	-0.0467987	0.147233	0.239198	-0.0606834	-0.0224397	0.116907	-0.56064
14963	b0838	putative transferase (VIMSS)	0.132601	-0.0404939	0.172101	-0.394475	0.271865	0.285986	-0.408879	-0.188957	0.0440768	-0.370027	-0.443156	-0.429972	-0.425497	-0.430056	-0.387238	-0.18072	-0.403476	-0.367301	-0.396201	-0.294615	-0.132031	-0.150527	-0.47094	-0.736885	-0.420621	-0.0434477	0.0436274	-0.151114	-0.328731	-0.32809	-0.380148	-0.378238	0.287527	-0.330939	-0.0995607	0.0740851	0.0101812	-0.254766	-0.0737851	-0.391589	-0.401698	-0.562722	-0.505105	-0.133447	0.256219	-0.641266	-0.012365
14964	b0839	D-alanyl-D-alanine carboxypeptidase (penicillin-binding protein 6a) (NCBI)	-0.0168988	0.411571	-0.29142	-0.618156	0.533924	-0.135275	0.135328	0.00871249	0.198534	0.215659	0.121597	0.172461	0.176731	0.172486	0.664418	0.653328	0.200687	0.237664	0.206402	0.219748	0.197021	0.167556	0.445566	0.544397	0.361887	2.16682	0.175963	0.650317	-0.0734289	-0.0709577	-0.12322	-0.12127	0.320299	0.139067	0.537922	0.0825354	-0.0222905	0.0255342	-0.19068	-0.502196	0.144054	-0.204659	-0.155665	-0.216967	-0.0561772	-0.0354928	0.318989
14965	b0840	DNA-binding transcriptional repressor (NCBI)	0.147255	1.08004	1.34762	1.08514	0.723512	0.93311	0.721456	0.966223	0.801196	0.836877	0.723951	0.811743	0.815771	1.08788	0.756529	0.866317	0.842029	0.879986	0.845868	0.868885	0.844275	0.795282	0.771564	0.793619	0.443572	0.91192	0.62807	0.466043	1.02041	1.02546	0.97291	0.97506	0.826043	0.873434	0.618195	0.405766	0.23476	0.785208	-1.02797	0.481126	1.61764	1.20924	1.22364	1.20032	3.73671	0.941553	0.777974
14966	b0841	undecaprenyl pyrophosphate phosphatase (NCBI)	0.0445496	0.231518	0.230331	0.75487	0.560697	0.674794	0.414641	0.821071	0.468561	0.475343	0.391873	0.422961	0.647843	0.423019	0.59913	0.188438	0.450141	0.486659	0.456745	0.465648	0.453564	0.692102	0.387869	0.117971	0.0494806	0.0256063	0.148922	0.538332	0.134538	0.136447	0.0842489	0.0862095	0.636655	0.186348	0.0969789	0.741792	-0.783438	9.47885	0.635417	-1.05385	0.0607521	0.0405728	0.0943255	0.0278553	0.0432686	0.177712	-0.398343
14967	b0842	multidrug efflux system protein (NCBI)	-0.0613916	-0.365987	-0.838048	-0.725803	0.027657	-0.998056	-0.69339	-0.821707	-0.656502	-0.664744	-0.73298	-0.728373	-0.723854	-0.728535	-0.728754	-0.67899	-0.702209	-0.666203	-0.248029	-0.690588	-0.420706	-0.742294	-0.632459	-1.03627	-0.624666	-0.798427	-0.633669	1.09183	-0.689218	-0.689618	-0.74156	-0.739712	-0.86454	-0.0402209	-1.19326	-0.76273	0.262301	-0.338221	-0.215349	0.370407	-0.597138	-0.857113	-0.875919	-0.401494	-0.625449	-0.819776	0.0995644
14968	b0843	hypothetical protein (NCBI)	-0.412023	0.139036	0.138935	2.12966	0.326866	1.62931	0.308792	0.204743	0.358458	0.361104	0.281918	0.305492	0.309918	0.305634	1.00615	0.0715853	0.332279	0.368646	0.339176	0.346642	0.33494	0.274927	0.270501	0.000244636	0.217298	0.655367	0.159003	0.294303	0.763889	0.766594	0.714309	0.716482	0.568251	0.685131	0.877751	-0.439818	-0.493373	-0.0788134	-0.0615572	-0.165435	0.354271	0.333966	0.385898	0.321554	-0.033471	0.680852	-0.584197
14969	b0844	orf, hypothetical protein (VIMSS)	-0.0284656	1.46108	1.34682	1.25945	1.14642	1.06731	1.45778	1.433	1.54805	1.58876	1.69666	1.56306	1.56713	1.56353	1.69886	1.5059	1.59279	1.63056	1.59696	1.61785	1.69164	1.56753	1.5235	1.46584	1.65708	1.54798	1.83161	1.45759	1.65562	1.66797	1.61458	1.61709	1.4667	1.40692	1.02203	0.893319	1.11415	1.06373	0.0919111	-0.464235	1.35264	1.32871	1.68944	1.31942	1.62522	1.50004	1.40872
14970	b0845	predicted transporter (NCBI)	0.0851157	0.0788503	0.277425	-0.077253	1.00024	-0.00586534	0.0627023	0.357205	0.116874	0.12569	0.193562	0.0704169	0.0770033	0.228434	0.0197932	0.0701681	0.0930681	0.128426	0.100563	0.117912	0.0972487	0.217509	0.31762	-0.0752126	-0.297939	0.108649	0.30554	0.34173	0.225425	0.226786	0.171003	0.29215	0.0282738	0.18251	-0.00858088	0.175505	0.503369	0.0341844	0.381996	-0.318728	0.117889	-0.00114439	0.231395	0.103314	0.501692	0.337166	0.0233387
14971	b0846	predicted DNA-binding transcriptional regulator (NCBI)	0.257724	0.0506759	0.0258417	0.168001	0.32339	0.285638	0.0301007	-0.114112	0.0839843	0.0920908	0.00332627	0.256628	0.0424812	0.0325096	-0.0147794	-0.194564	0.0584228	0.0937254	0.0660226	0.0828239	0.0622595	0.00885233	0.000866589	-0.164852	0.0452614	0.0236957	-0.27133	-0.466108	-0.096805	-0.0961109	-0.155167	-0.14238	-0.204625	-0.0742856	0.415914	0.133824	1.55326	-0.122568	0.171622	-0.228477	0.214938	0.0602805	0.114514	0.442708	0.599591	-0.176762	0.497732
14972	b0847	hypothetical protein (NCBI)	0.198905	0.365296	0.383266	0.405785	0.463273	0.31817	0.556171	0.550056	0.368845	0.259991	0.172835	0.286034	0.297318	0.210773	0.81484	0.0707641	0.238343	0.275018	0.244642	0.584763	0.242605	0.213798	0.253052	0.599531	0.455182	0.191459	0.646691	0.27904	0.199133	0.201126	0.140245	0.150905	0.091513	-0.0130469	0.163831	0.55834	0.753008	0.25098	0.320454	0.0685853	0.379839	0.358444	0.290159	0.325457	1.21209	0.329458	0.0730113
14973	b0848	predicted inner membrane protein (NCBI)	0.175008	0.333557	0.729732	0.238391	0.732815	0.0809785	0.141246	0.0557694	0.197636	0.212163	0.120159	0.191943	0.178734	0.18431	0.140434	-0.0531599	0.208834	0.236957	0.214104	0.226412	0.357004	0.450693	0.267183	0.292936	0.235496	0.215705	0.458919	0.0826579	0.323125	0.326721	0.273598	0.280457	0.126619	-0.0012479	0.483363	0.356698	0.388645	0.215848	-0.185534	0.16133	0.634985	0.452833	0.49424	0.451118	0.209244	0.411645	-0.012365
14974	b0849	glutaredoxin 1, redox coenzyme for ribonucleotide reductase (RNR1a) (NCBI)	0.158745	0.911092	0.91168	1.21484	-0.351479	0.3442	0.867632	0.773561	0.920084	0.927357	0.842846	0.898671	0.885581	0.891182	0.847221	0.966844	0.914408	0.942048	0.920599	0.928125	0.920912	0.851438	0.867851	0.881335	0.512036	0.8985	0.914753	1.18213	1.0058	1.00848	0.955464	0.962404	0.809072	0.686507	0.150251	0.281904	2.26955	1.32528	0.0984097	-1.83734	1.11108	1.08824	1.12415	1.07796	0.718611	0.658918	0.331432
14975	b0850	predicted inner membrane protein (NCBI)	0.0368504	0.226733	1.31823	0.436353	-1.02295	-0.33216	0.112186	0.000584994	0.155286	0.154843	0.0780832	0.12064	0.107613	0.11292	0.068818	-0.119846	0.13597	0.163367	0.142642	0.147842	0.140848	0.471983	0.0896196	0.670316	-0.268027	0.677622	0.0560634	0.0715604	0.0177876	0.018417	-0.0343717	-0.0276432	-0.180898	0.0893564	-0.390412	-0.363161	-0.384257	0.0162523	0.55057	0.330991	0.450013	0.42914	0.483929	0.417033	0.0596299	-0.116768	0.0647328
14976	b0851	nitroreductase A, NADPH-dependent, FMN-dependent (NCBI)	0.146916	-0.176985	0.198986	0.140437	-0.00740538	0.0929526	-0.215297	-0.28138	-0.148228	-0.126416	-0.22533	-0.165323	-0.161108	0.334664	-0.199857	0.79924	-0.136553	-0.0993588	-0.131258	-0.115811	-0.129379	0.190962	-0.200618	-0.463149	-0.531636	-0.0767431	0.931323	0.197759	0.0436421	0.0512522	-0.0102649	0.00047831	0.582737	-0.27456	0.470032	-0.210686	-0.443467	-0.184319	-0.341789	-0.458354	-0.591797	0.119842	0.0769187	-0.614179	-0.244005	0.0805926	-0.7214
14977	b0852	ribosomal protein S6 modification protein (NCBI)	0.117022	-0.664992	-0.663866	-0.891826	-1.90843	-0.15746	-0.3187	-0.432112	-0.275035	-0.277135	-0.351617	-0.336086	-0.331623	-0.336189	-0.370938	-0.558514	-0.309474	-0.273253	-0.302288	-0.296218	-0.307903	-0.368118	-0.371303	-0.642896	-0.210765	-0.407961	-0.890747	-0.198463	-0.287068	-0.286918	-0.347594	-0.128768	-0.489909	-0.606978	-0.430995	0.828077	1.22109	-0.969628	-1.18301	-0.00494063	-0.551586	-0.566726	-0.487122	-0.572206	-0.948267	-0.45065	-1.576
14978	b0853	predicted oxidoreductase (NCBI)	-0.0260509	-0.0208023	0.448202	-0.314083	-0.105895	0.0517663	0.33664	0.235012	0.384968	0.388972	0.307756	0.358055	0.344989	0.350484	0.354984	0.315954	0.373624	0.401169	0.380005	0.386622	0.379502	0.309926	0.327165	0.566141	0.169748	0.0736768	0.806575	-0.136079	0.181264	0.18259	0.129724	0.136527	-0.0167463	0.392321	0.529754	0.12397	0.368197	-0.117086	0.338236	0.0340689	0.287347	0.158736	0.218215	0.452559	0.175865	0.119842	-0.546783
14979	b0854	putrescine transporter subunit: periplasmic-binding component of ABC superfamily (NCBI)	-0.128907	-0.693461	-0.720582	0.106079	-0.767676	-0.93894	-0.384651	0.254084	-0.344653	-0.347089	-0.421851	-0.382271	-0.395289	-0.0412317	-0.434195	4.08789	-0.366967	-0.339601	-0.360233	-0.3553	-0.362323	-0.432114	-0.413358	-0.391324	-0.774024	-0.534063	-1.03093	-0.663488	-0.426131	-0.427283	-0.479873	-0.473217	-0.626113	-0.200925	-0.663907	-0.312228	0.173863	-0.105672	0.308881	0.0877436	-0.71117	-0.730049	-0.656206	-0.729097	-0.459019	-0.431733	1.0692
14980	b0855	ATP-binding component of putrescine transport system (VIMSS)	-0.0117496	-0.482094	-0.654542	-0.632818	-0.801754	-0.427316	-0.529755	-0.66553	-0.503256	-0.510534	-0.579726	-0.573469	-0.568958	-0.573586	-0.60839	0.0652506	-0.547264	-0.511227	-0.539718	-0.535409	-0.384517	-0.607115	-0.608677	-0.418496	-0.649499	-0.760599	-0.813819	-0.95488	-0.639565	-0.640319	-0.700895	-0.46182	2.70326	-0.960022	-0.409974	-0.273724	-0.584255	-0.536902	-0.262596	-0.703184	-0.544105	-0.789651	-0.718962	-0.597599	-0.0269636	-0.691806	-0.248963
14981	b0856	putrescine transporter subunit: membrane component of ABC superfamily (NCBI)	0.103091	0.615003	0.585413	0.347706	-0.662059	0.297068	0.641818	0.542626	0.690368	0.694884	0.61313	0.667106	0.654024	0.659575	0.615592	0.438487	0.672019	0.710414	0.689052	0.696305	0.6891	0.616251	0.636248	0.632848	0.858224	0.887864	0.97445	0.583428	1.00815	1.01225	0.951134	0.96199	0.808575	0.690614	0.846203	0.62029	0.104756	0.922347	0.117421	0.429917	0.459116	0.450426	0.501957	0.453209	0.477388	0.467425	-0.309583
14982	b0857	putrescine transporter subunit: membrane component of ABC superfamily (NCBI)	0.0308025	1.33524	1.30389	1.28397	0.0464549	0.974251	1.18866	1.1176	1.25184	1.26949	1.17442	1.25168	1.23848	1.24434	1.20054	1.0236	1.2575	1.29636	1.27364	1.28526	1.27738	1.20495	1.22096	0.956547	0.911785	0.989276	1.10277	0.372156	1.10951	1.11362	1.0525	1.06339	0.910039	1.02471	1.3276	1.6886	0.99967	1.17168	-0.395301	0.622184	1.15023	1.14016	1.17826	1.14422	0.786453	1.30508	-0.045067
14983	b0858	predicted inner membrane protein (NCBI)	-0.0805131	0.823597	0.79436	0.554827	1.28362	0.239166	0.928617	0.838041	0.981759	0.990297	0.904429	0.965462	0.952345	0.957933	0.913988	0.726844	0.970672	1.0092	0.987446	0.995956	0.988501	0.915754	0.93459	0.668291	0.578948	1.09373	0.607567	0.406331	1.21403	1.21761	1.15655	1.16741	1.01416	0.896474	1.5586	0.163587	0.102124	0.528087	-1.19349	0.517403	1.67959	0.969346	1.0159	0.972592	0.574165	0.308306	-1.93655
14984	b0859	23S rRNA m(5)U747-methyltransferase (NCBI)	0.079151	0.12249	0.0121507	-0.0916482	0.00388148	0.102478	-0.124547	0.28053	-0.0843613	-0.0866109	0.0593742	-0.119055	-0.132086	-0.00865047	-0.170836	-0.187502	-0.114499	-0.076305	-0.0970684	-0.0117041	0.0529868	-0.133284	-0.150048	-0.360814	-0.153499	-0.287779	-0.124768	-0.43458	-0.233542	-0.232958	-0.293682	-0.189452	-0.245029	-0.0955396	-0.269335	-0.123529	1.06637	-0.184232	0.171163	0.198126	-0.215664	0.0534333	0.130471	-0.165515	-0.257209	-0.204446	-0.522381
14985	b0860	arginine transporter subunit (NCBI)	0.360609	0.301044	0.34261	0.266814	-0.434721	-0.384302	-0.229751	-0.0858069	-0.20367	-0.21643	0.072026	-0.241103	-0.255954	-0.137547	-0.0320802	-0.485176	-0.241051	-0.207425	-0.225821	-0.203802	-0.23246	-0.307517	-0.269667	-0.0427753	0.35949	-0.0582495	-0.120929	0.744355	0.0480521	0.0488085	-0.0119347	0.339639	-0.154266	-0.0212034	0.606497	0.799764	-0.789795	-0.302953	0.337346	0.304358	-0.146781	-0.264385	-0.359912	0.321352	-0.295938	-0.296135	-0.448683
14986	b0861	arginine transporter subunit (NCBI)	-0.0410255	-1.44916	-1.47742	-0.531243	-0.411221	-0.970181	-1.43541	-1.56133	-1.40693	-1.41273	-0.828112	-1.44005	-1.45032	-1.45108	-1.00858	0.054429	-1.428	-1.40547	-1.42077	-1.39723	-1.42988	-1.50375	-1.4584	-1.74986	-1.10859	-0.987021	-0.674365	-0.981718	-1.2673	-1.26561	-1.32646	-0.594308	-1.46476	-1.31775	-0.65512	-1.12232	-1.35335	-1.75805	-1.06786	-0.0828935	-0.493357	-1.30767	-1.26492	-0.783541	1.63184	-1.06771	-1.33849
14987	b0862	arginine transporter subunit (NCBI)	0.10037	1.04458	1.01282	1.36112	0.648187	0.902725	1.23889	1.18719	1.30351	1.34036	1.24334	1.33357	1.32454	1.33849	1.27063	1.09659	1.34062	1.37098	1.34517	1.38394	1.34517	1.28278	1.34092	1.04681	0.945658	1.90598	1.20038	0.400685	1.21392	1.2197	1.16634	1.54195	1.4761	1.49491	0.843511	0.32093	0.235664	0.711975	-1.062	-0.729842	1.17942	1.15732	1.17561	1.2167	1.33247	1.24685	-0.61398
14988	b0863	arginine transporter subunit (NCBI)	0.189614	0.547989	0.730395	0.301025	0.0670912	0.154061	0.645433	0.351171	0.504601	0.512149	0.434158	0.49108	0.482217	0.49563	0.427477	0.25895	0.496884	0.526583	0.502717	0.57227	0.49733	0.456665	0.49814	0.200261	0.152428	0.163178	0.297425	0.251006	0.268561	0.272473	0.219317	0.264703	0.723572	0.0882759	0.409689	0.226226	0.482676	0.926923	0.0226159	-0.215033	0.249825	0.189642	0.221232	0.27829	0.446589	0.561295	0.83549
14989	b0864	arginine transporter subunit (NCBI)	0.162202	0.34358	0.315026	0.883283	-0.491858	-0.230472	0.2703	0.140949	0.309046	0.302023	0.2389	0.672542	0.260729	0.273945	0.205623	0.0375777	0.274082	0.303242	0.280967	0.308308	0.271402	0.230295	0.276519	0.32763	-0.124598	0.19383	0.234511	0.3751	0.299431	0.299987	0.247207	0.255261	0.101648	0.44525	0.379233	-0.360692	-0.349109	0.525912	0.604643	0.60291	0.476057	0.457038	0.504137	0.476522	0.0728926	0.579075	-0.851028
14990	b0865	predicted lipoprotein (NCBI)	-0.0237841	0.99807	0.693879	0.355764	0.269798	0.187237	0.858447	0.77641	0.916107	0.926193	0.841847	0.913135	0.906623	0.902684	0.852402	0.684633	0.926237	0.949387	0.932237	0.961703	0.928486	0.884522	0.895281	0.632524	0.531561	0.59829	0.503787	0.456298	0.703528	0.706856	0.653039	0.661457	0.508205	0.826265	0.313164	1.04737	0.530812	0.461745	-0.443544	-0.517492	0.633878	0.609109	1.19177	0.743877	0.497893	0.971967	0.134377
14991	b0866	hypothetical protein (NCBI)	-0.0659247	-0.453814	-0.480545	-0.636307	-1.26361	0.607794	-0.591287	-0.711572	-0.565025	-0.591544	-0.63181	-0.62843	-0.634634	-0.617735	-0.661571	-0.73942	-0.631466	-0.60958	-0.623116	-0.604093	-0.608618	-0.643315	-0.625275	-0.817606	-0.886267	-0.473932	-0.777596	-0.953751	-0.392349	-0.393729	-0.447023	-0.424118	-0.538743	-0.581161	-0.920053	-1.26194	-1.17146	-0.993717	-2.13261	-0.407919	-0.675062	-0.696228	-0.635689	-0.668954	-0.908176	-0.456517	-0.754862
14992	b0867	predicted amidase and lipoprotein (NCBI)	-0.0583186	-0.498344	-0.895012	-0.887756	0.206534	-0.607836	-0.998885	-0.455788	-0.977544	-0.495549	-1.05249	-1.03724	-1.04346	-0.584957	-1.09898	-0.756754	-1.02632	-1.00428	-1.01813	-0.920235	-0.736406	-1.07599	-0.800605	-0.905644	-1.05545	-0.636491	-0.695713	-0.759445	-0.83632	-0.836717	-0.890122	0.00845055	-0.355522	-0.95324	0.0414458	-0.127681	-0.0281732	-0.446219	-0.340587	-0.169527	-1.22189	-1.23203	-1.16905	-0.943426	-0.680754	-0.906289	0.168025
14993	b0868	putative nucleotide di-P-sugar epimerase or dehydratase (VIMSS)	-0.0065787	-0.715123	-0.194065	-0.597985	-0.431643	-0.509609	-0.367449	-0.8057	-0.77665	-0.792632	0.330252	-0.825083	-0.595519	-0.836035	-0.886718	-0.456076	-0.813648	-0.791376	-0.805924	-0.784849	-0.708049	-0.861737	-0.453907	-0.688726	-0.61415	-0.806282	1.09527	-0.0449179	-0.699827	-0.699024	-0.752563	-0.635818	-0.5242	-0.416381	-0.08236	0.0390669	-0.232086	-0.478168	0.0332752	-0.0903981	1.39903	-0.622375	-0.826046	-0.682449	-0.518559	-0.68676	0.027641
14994	b0869	putative dTDP-glucose enzyme (VIMSS)	0.139576	-0.905672	-0.0391414	-0.58327	-0.522025	-0.197751	-0.790892	-0.936067	-0.760677	-0.774544	-0.846236	-0.811885	-0.820556	-0.807618	-0.876067	-0.551681	-0.807587	-0.778634	-0.800292	-0.774928	-0.811677	-0.157839	-0.796361	-1.10679	-0.928029	-0.447883	0.516319	-0.786603	-0.593205	-0.594526	-0.647098	-0.639166	-0.792522	-0.0258311	-0.79365	0.0046914	-0.229314	-0.152448	-0.303233	0.128082	-0.41079	-0.751159	-0.689583	-0.753275	-0.475184	-0.320952	-0.676322
14995	b0870	L-allo-threonine aldolase, PLP-dependent (NCBI)	0.106348	-0.582322	-0.612178	-0.515914	-0.0788766	-0.788467	-0.71584	-0.866116	-0.690521	-0.707601	-0.776124	-0.751936	-0.756384	-0.740653	-0.818153	-0.986468	-0.743733	-0.717079	-0.736092	-0.718015	-0.747731	-0.787615	-0.0624079	-1.03811	-0.802966	-0.483196	-0.274691	-0.870978	-0.374384	-0.377784	-0.431572	-0.40697	-0.275697	-0.339457	-0.434843	-1.1599	-0.240078	-1.13705	-0.745855	0.578459	-0.683809	-0.701021	-0.621334	-0.683243	0.0156452	-0.510407	-0.312869
14996	b0871	pyruvate dehydrogenase (NCBI)	0.163685	0.3046	0.173733	0.0134755	-0.193736	0.0725504	0.0865575	-0.0282745	0.130056	0.129958	0.0441594	0.206961	0.0943625	0.110408	0.03313	-0.135393	0.108485	0.135765	0.114904	0.138985	0.24221	0.0688753	0.123305	0.213312	-0.0824855	0.257687	-0.0958308	-0.0471305	0.244629	0.243817	0.189741	0.214465	0.0441356	0.0678338	0.479448	0.124792	0.499278	0.413386	0.108783	0.282432	-0.133079	-0.151578	-0.0839288	0.0429429	-0.229826	-0.0693892	0.986671
14997	b0872	HCP oxidoreductase, NADH-dependent (NCBI)	-0.205977	-0.963328	0.0323298	-0.444154	-0.854618	0.451513	-0.6545	-0.725535	-0.591754	-0.567187	0.0929887	-0.57319	-0.578134	-0.561754	-0.638664	0.278371	-0.56069	-0.53206	-0.556861	-0.519516	-0.553085	-0.591295	-0.54901	-0.0597477	-0.962313	-0.711363	0.529099	-0.902707	-0.603903	-0.588109	-0.644145	-0.619066	-0.793807	-0.897375	-1.44394	-0.669001	-0.663344	0.700341	-2.10335	-0.380098	0.486839	-0.791721	-0.0618323	-0.0525898	-0.281954	-0.533395	-1.61658
14998	b0873	putative prismane (VIMSS)	-0.0582251	-0.295309	-0.694359	-0.59539	-0.52589	-0.350919	-0.611024	-0.473661	-0.575052	-0.581901	-0.660867	-0.573986	-0.622644	-0.606777	-0.571784	-0.652925	-0.609055	-0.582018	-0.602163	-0.580409	-0.610833	-0.281939	-0.480857	-0.196183	-0.351118	1.14524	-0.840149	-0.813649	-0.617731	-0.620097	-0.59883	-0.249333	-0.569418	-0.528043	-0.623822	-0.635637	0.474878	-0.428811	0.214925	-0.106214	-0.700699	-0.613457	-0.64587	-0.700262	-0.450923	1.46257	0.0643154
14999	b0874	putative surface protein (VIMSS)	0.0761323	0.136266	0.254506	0.34819	0.412863	0.308184	-0.145562	-0.153847	-0.0982631	-0.0944531	0.0435774	-0.122268	0.0113382	0.00449133	-0.0258712	0.052437	-0.112386	-0.0849552	-0.10626	-0.0807421	-0.111856	0.136322	0.0143094	-0.0334345	-0.332574	0.135278	-0.151459	-0.226997	0.0644764	0.0637341	0.00965042	0.116997	-0.0562262	0.0436963	0.132418	0.0135334	1.05261	0.0200498	0.222595	0.299232	0.178422	0.0909771	0.125658	0.129473	-0.0298059	0.132496	0.811308
15000	b0875	aquaporin Z (NCBI)	0.111244	1.11309	1.07728	1.10101	0.30224	1.45811	1.10079	1.05064	1.17757	1.20817	1.17888	1.20101	1.19611	1.21281	1.14314	1.91445	1.38206	1.24117	1.21704	1.25171	1.21143	1.45932	1.27744	0.923778	0.813634	1.27731	0.667413	0.516427	1.22533	1.2321	1.17717	1.38213	1.03039	1.11697	0.623459	0.628055	1.04962	0.563095	0.161655	0.653088	1.0361	1.01273	1.03597	1.03439	0.636528	1.4962	-0.060006
15001	b0876	conserved protein with nucleoside triphosphate hydrolase domain (NCBI)	0.0850976	-0.0491594	-0.274349	-0.123708	-0.218219	0.0558102	-0.330507	-0.137166	-0.284324	-0.290773	-0.0193436	-0.322501	-0.331239	2.40889	-0.392626	-0.561342	2.74057	-0.288463	-0.31088	-0.283061	-0.320224	-0.361343	-0.30693	-0.616079	-0.0342437	-0.170552	-0.284324	-0.703542	-0.231683	-0.231137	-0.285378	-0.27593	-0.186542	-0.128226	0.071314	-0.400958	0.37634	-0.0332904	-0.298874	-0.334763	-0.162038	-0.677827	-0.593956	-0.287003	-1.0622	-0.307383	0.719955
15002	b0877	hypothetical protein (NCBI)	0.0503458	-0.314322	-0.3449	-0.494371	0.245184	-0.0964869	-0.303273	-0.422337	-0.25586	-0.261027	0.121963	-0.291628	-0.300379	-0.287249	-0.361693	-0.0837826	-0.286695	-0.25743	-0.280012	-0.251649	-0.288888	-0.329951	-0.189448	-0.159392	-0.103971	-0.0352085	-0.182862	-0.517075	-0.269607	-0.268191	-0.32253	-0.31306	-0.248739	0.05579	-0.473813	-0.148239	-0.118329	-0.616939	-0.0261896	0.105171	0.152034	-0.264737	-0.0773605	-0.103333	-0.382708	-0.0348907	-1.083
15003	b0878	putative membrane protein (VIMSS)	-0.0877028	0.0349582	0.0033213	-0.235702	0.752126	0.284831	0.160771	0.0892509	0.231019	0.250345	0.446885	0.241789	0.232755	0.246312	0.172222	-0.0080214	0.249135	0.279527	0.253645	0.292974	0.253606	0.213516	0.432872	-0.046411	0.0394716	0.290236	-0.0928255	0.142085	0.396991	0.400982	0.346355	0.443339	0.201538	0.0984935	-0.146628	-0.00939853	-0.611442	-0.123912	0.289055	0.1536	0.244123	0.22008	0.268188	0.252025	0.634525	0.307866	-1.35307
15004	b0879	fused macrolide transporter subunits of ABC superfamily: ATP-binding component/membrane component (NCBI)	-0.0930363	0.0257624	0.105955	0.145742	-0.596515	-0.210559	-0.0843423	-0.12389	-0.0370122	-0.032971	0.013311	-0.0603348	-0.0649887	-0.0488946	-0.126121	-0.141259	-0.05042	-0.0229594	-0.0443503	-0.0185264	0.0748427	-0.0562876	-0.036018	-0.342688	-0.251855	-0.112932	-0.524665	-0.176878	-0.00442384	0.0278858	-0.0586941	0.208483	-0.163038	-0.169396	-0.549506	0.206426	-0.465946	0.281736	-0.0493982	-0.187119	0.292041	0.754573	0.0866045	0.217087	0.183572	0.273919	0.743827
15005	b0880	cold shock protein homolog (NCBI)	0.26311	-0.284395	-0.30985	-0.464993	-1.13016	0.285928	-0.299413	-0.409214	-0.264515	-0.281643	-0.343105	-0.322118	-0.326584	-0.289075	-0.359584	-0.443294	-0.327582	-0.300925	-0.320076	-0.300315	-0.303133	-0.33254	-0.276395	-0.50362	-0.5873	-0.293952	0.324739	-0.772426	-0.209567	-0.212872	-0.264239	-0.227239	-0.352147	-0.402248	0.626278	-0.0977966	-1.08238	-0.873558	-0.655473	0.704805	-0.555232	-0.575909	-0.500053	-0.528276	-0.787687	-0.292583	-0.480652
15006	b0881	ATP-dependent Clp protease adaptor protein ClpS (NCBI)	-0.550378	-0.283027	-0.308521	0.990036	0.253228	0.306231	0.0159918	-0.0816619	0.0571995	0.0414744	1.43327	0.00932576	0.0048108	0.0425195	-0.0278894	-0.121939	0.00419734	0.0310464	0.0113291	0.0329218	0.0298956	0.000692934	0.0551757	-0.176566	-0.252436	-0.0432472	-0.367778	-0.522161	0.0409386	0.0384946	-0.0129675	0.0241276	-0.100796	-0.155453	0.349582	-0.31524	-0.31527	-0.0377325	-1.20689	0.215523	0.284074	0.261533	0.319185	0.311096	5.52569	0.191859	-0.718288
15007	b0882	ATPase and specificity subunit of ClpA-ClpP ATP-dependent serine protease, chaperone activity (NCBI)	-0.0480625	0.258936	0.254543	0.135535	0.899253	0.45021	0.38279	0.364985	0.650553	0.424703	0.479835	0.41111	0.402314	0.415631	0.34128	0.161366	0.416341	0.445778	0.422687	0.452675	0.468813	0.435108	0.426829	0.23726	0.38001	0.201887	0.178435	-0.0469072	0.308812	0.310171	0.400067	0.301294	0.111662	0.235367	0.26814	0.111086	0.833254	0.083504	-0.181233	-0.32579	0.309179	0.230993	0.19086	0.300289	0.511835	0.255224	-0.0353204
15009	b0885	leucyl/phenylalanyl-tRNA--protein transferase (NCBI)	0.0624676	-0.930151	-0.92947	-0.221958	-1.83064	-0.203714	-0.783523	0.274577	-0.749051	-0.76765	-0.839197	-0.790598	-0.79692	-0.801568	-0.856523	-0.737419	-0.778838	-0.756427	-0.771386	-0.748982	-0.781331	-0.826056	-0.775116	-1.10036	-0.916433	-0.809669	-0.848612	-1.50521	-0.703128	-0.703293	-0.756723	-0.748621	-0.901626	-1.0236	-0.0870869	-0.594654	0.847377	-0.607805	-0.267485	0.475336	-1.03004	-1.04575	-0.96699	-0.703586	0.566163	-0.382025	-0.853481
15012	b0888	thioredoxin reductase, FAD/NAD(P)-binding (NCBI)	-0.645551	3.18652	3.17444	2.99275	1.9489	2.59231	2.84562	2.89951	2.98272	3.05179	2.88544	3.09523	3.08427	3.44889	3.03124	2.84561	3.10131	3.13801	3.11054	3.16193	3.12372	3.05776	3.07813	2.93356	2.72625	2.56532	2.06745	2.36061	2.68035	2.69245	2.63547	2.64694	2.49226	2.36761	2.31792	2.41522	1.89055	2.84159	1.70673	-0.544677	3.16635	3.13986	3.093	3.65591	3.98384	2.65625	0.791103
15013	b0889	DNA-binding transcriptional dual regulator, leucine-binding (NCBI)	-0.557359	1.3798	0.779475	0.570176	0.0227977	1.38862	1.18262	1.13642	1.26629	1.29176	1.16809	1.28752	1.28702	1.28012	1.23112	1.04739	1.29481	1.3343	1.3097	1.32755	1.96989	1.24973	1.27387	1.48796	0.909922	0.982094	0.983437	0.299828	1.10124	1.10496	1.05113	1.06413	0.906961	1.32891	0.250646	0.854175	-0.0933955	0.363087	-0.67508	-0.863669	0.839652	0.820097	0.862652	0.836356	1.0477	1.21511	-1.06856
15014	b0890	DNA-binding membrane protein required for chromosome resolution and partitioning (NCBI)	-1.69714	3.97491	3.94077	3.71486	2.62053	3.37311	4.24665	4.53019	4.5471	4.64302	4.37927	4.74803	4.74623	4.74362	4.69697	4.51868	4.76492	4.80953	4.76983	4.83677	4.80779	4.75736	4.73674	4.50403	4.4083	4.25692	3.74691	3.76411	4.37158	4.48442	4.34653	4.36156	4.34628	4.0641	3.50562	3.16977	3.07012	3.89371	1.81382	0.0749639	4.16153	4.12797	4.03776	4.31925	3.74792	4.00925	1.6411
15016	b0892	recombination protein (NCBI)	-0.010678	-0.936424	-1.33391	-1.36736	-0.531237	-1.09563	-1.24419	-1.43558	-1.20884	-1.24202	-1.3007	-1.29613	-1.28656	-1.29638	-1.20847	-1.10641	-1.28034	-1.23455	-1.26236	-1.26023	-1.28097	-1.33504	-1.14489	-1.3566	-1.26532	-1.05184	0.125764	-0.141535	-1.14003	-1.0144	-1.19223	-1.21343	-1.14121	-1.14797	-0.45864	-0.660569	-0.411942	-0.44389	-0.0554354	0.0390665	-0.820988	-0.924046	-1.09229	-0.927115	-0.399976	-1.11606	0.255929
15018	b0894	anaerobic dimethyl sulfoxide reductase subunit A (VIMSS)	-0.0974459	-1.03492	-0.762661	-0.985901	-0.766554	-0.690019	-0.732708	-0.753326	-0.695439	-0.713869	-0.788463	-0.753111	-0.753183	-0.636852	-0.699697	-0.349358	-0.749268	-0.711428	-0.731144	-0.729197	-0.748674	-0.626345	-0.746753	-0.843476	-0.475959	-0.444791	-0.594727	-0.339419	-0.681984	-0.684004	-0.545017	-0.64859	-0.704856	-0.619002	-0.418286	-0.606016	-0.217578	-0.733251	-0.346825	0.130312	0.171544	-1.03467	-0.949549	-0.848081	-0.194353	-0.875565	-0.171639
15019	b0895	dimethyl sulfoxide reductase, anaerobic, subunit B (NCBI)	-0.00798898	-0.563617	-0.56418	-0.755985	-0.156001	-0.35569	-0.406843	-0.579408	-0.361575	-0.386156	-0.453535	0.237459	-0.424387	-0.433976	-0.149046	0.16313	-0.417544	-0.371457	-0.400124	-0.395245	-0.416372	-0.47016	-0.44246	-0.420779	-0.127335	-0.308288	-0.65636	-0.6841	-0.193297	-0.194303	-0.243883	-0.189093	-0.385732	-0.515763	0.24888	-0.00379038	-0.585027	-0.763258	0.198946	0.449197	-0.404147	0.23917	-0.329016	-0.393544	-0.327235	-0.567135	-1.68802
15020	b0896	dimethyl sulfoxide reductase, anaerobic, subunit C (NCBI)	0.210688	-0.258467	-0.0747277	0.273211	0.453873	0.210253	-0.260309	-0.428138	0.143505	-0.234913	-0.169967	-0.280906	-0.271433	-0.151162	-0.336955	0.0465826	-0.264398	-0.218231	-0.247135	-0.241491	-0.262757	-0.275608	0.39619	-0.577644	-0.360757	1.42578	0.0274273	-0.207218	-0.111572	-0.112561	-0.160679	-0.181722	0.298037	-0.197101	-0.0146329	0.261738	0.0686383	-0.226995	0.108831	-0.47433	1.47638	1.70005	-0.272488	-0.310406	-0.133113	1.45025	-0.856848
15021	b0897	predicted hydrolase (NCBI)	-0.122362	0.396765	0.394067	0.197851	0.0545325	-0.1468	0.79806	0.670546	0.866793	0.86321	0.774538	0.831403	0.840709	0.831612	0.950717	0.805734	0.849192	0.896009	0.865183	0.877039	0.854827	0.979709	0.823039	0.781657	0.933417	0.472547	0.00185553	0.439466	0.592897	0.594055	0.545698	0.524776	0.396542	1.0675	-0.277613	0.583424	0.212451	0.528489	0.889663	0.120663	0.68377	0.688308	0.742536	0.694344	0.471021	0.766489	0.381464
15022	b0898	putative MFS family transporter protein (NCBI)	0.188471	0.755105	0.664453	0.689271	0.153658	1.27516	0.676098	0.63885	0.588337	0.598759	0.485014	0.571185	0.580584	0.567971	0.512665	0.71947	0.673492	0.631446	0.601455	0.780012	0.603802	0.559235	0.73114	0.469412	0.414401	0.405365	0.113951	0.378627	0.520022	0.52292	0.544515	0.602064	0.622359	0.75907	-0.0318924	0.34558	0.230414	0.217993	-0.566333	0.297039	0.338484	0.224344	0.408493	1.64725	0.0460074	0.471383	0.458067
15023	b0899	putative transport (VIMSS)	0.0491168	1.1929	1.20609	1.39834	0.846044	0.889216	1.239	1.20499	1.32144	1.34086	1.2769	1.36028	1.32773	1.48832	1.32008	1.19637	1.33781	1.37905	1.34854	1.37446	1.35392	1.29961	1.41358	1.04983	1.11521	1.1668	1.03757	1.11503	1.24786	1.25335	1.23645	1.18006	1.10367	1.25766	0.839015	0.64054	0.426122	0.861627	-0.28597	-0.342238	1.13745	1.2294	1.14966	1.41868	0.891525	1.27531	0.594089
15024	b0900	predicted DNA-binding transcriptional regulator (NCBI)	0.170972	1.07727	1.12606	0.952063	0.832489	0.816959	1.07386	1.14384	1.15225	1.16811	1.04891	1.14296	1.15734	1.20996	2.38317	1.23876	1.16217	1.20329	1.17314	1.19789	1.16909	1.23502	1.13063	0.973412	0.857109	1.13406	1.05188	0.761591	1.24816	1.25497	1.20737	1.22183	1.30406	1.07157	0.760606	0.618046	0.529421	0.8821	0.909093	0.0469663	1.1284	1.18109	1.10911	1.23616	1.03693	0.946209	-0.243083
15025	b0901	hypothetical protein (NCBI)	-0.062249	1.00575	1.0973	0.953755	1.07198	0.646697	1.08092	1.09072	1.16293	1.21755	1.18927	1.16088	1.17521	1.26271	1.18672	1.39439	1.18046	1.22175	1.19109	1.2175	1.27701	1.15107	1.15775	1.0158	0.900537	1.11103	1.05637	0.825558	1.23077	1.23748	1.19732	1.25151	1.04432	0.955774	0.766965	0.794211	0.344813	0.847984	-0.127019	-0.216369	1.11267	1.12542	1.25091	1.07958	0.816682	1.23608	0.0245993
15026	b0902	pyruvate formate lyase activating enzyme 1 (NCBI)	-0.0585947	-0.526383	-0.731389	-0.858581	-0.885013	-0.677409	-0.48983	-0.610439	-0.450778	-0.46938	-0.538416	-0.30515	-0.48944	-0.511818	-0.589149	0.322034	-0.4948	-0.448442	-0.477903	-0.420881	-0.492138	-0.3888	-0.42575	-0.613014	-0.202111	-0.30176	0.155649	-0.295819	-0.188307	-0.186724	-0.235134	-0.268186	-0.390412	0.0715996	0.0443965	0.389472	-0.650162	-0.457807	-0.987686	-0.0377099	-0.688588	-0.706638	-0.625717	-0.687374	0.0966068	-0.369719	-0.14126
15027	b0903	pyruvate formate lyase I (NCBI)	-0.198989	-0.12383	-0.0817386	-0.172959	0.0897315	-0.0832175	0.047861	0.014942	0.091611	0.0760866	-0.000506194	0.0618272	0.19618	0.0356511	0.000748481	0.0303788	0.047693	0.0990986	0.0605298	0.0774903	0.12669	0.0652521	0.0741777	0.0282851	-0.0865919	0.123923	0.136964	0.39691	0.104825	0.104728	0.0579026	0.0446835	0.0367873	0.123559	-0.114367	0.14249	-0.548059	-0.445544	-0.0622217	-0.111003	-0.0639605	-0.0898088	-0.100685	0.00800223	-0.257248	0.128921	-0.539451
15028	b0904	formate transporter (NCBI)	-0.00463432	0.219127	0.497471	0.34216	0.283972	-0.329495	0.825686	0.262987	0.40655	0.403576	0.319488	0.363654	0.545855	0.506813	0.286235	0.275822	0.381459	0.433131	0.413325	0.413285	0.378454	0.337543	0.504582	0.340735	0.114463	0.284077	0.0936989	-0.0489382	0.398333	0.397997	0.345249	0.31644	0.413432	0.0414439	-0.00639441	-0.499179	-0.317885	-0.240701	0.159353	-0.288076	0.088944	-0.0931013	0.176168	-0.0881354	-0.504267	0.29795	-0.0359172
15029	b0905	orf, hypothetical protein (VIMSS)	-0.143109	-0.208338	-0.162913	-0.209237	-0.183356	-0.33719	-0.316836	-0.270931	-0.272599	-0.26979	-0.365889	-0.300355	-0.297249	-0.191048	-0.000841019	-0.350466	-0.292276	-0.248803	-0.277074	-0.258312	-0.300058	-0.0352618	-0.318649	-0.138689	-0.515364	-0.194493	-0.207338	0.290431	-0.0747403	-0.0744131	-0.12883	-0.164491	-0.306157	-0.0662455	-0.0914314	-0.202187	-0.426405	-0.394382	0.296788	0.127589	0.0228325	-0.0685314	-0.148876	0.114974	0.269384	-0.0527019	0.0989063
15030	b0906	conserved inner membrane protein (NCBI)	0.156438	0.371916	0.266837	0.299306	0.404097	0.742663	0.213484	0.566424	0.255811	0.256967	0.162624	0.207337	0.227129	0.208527	0.134563	-0.0304606	0.488727	0.270112	0.242629	0.258704	0.469301	0.174238	0.486387	-0.0378012	0.0913275	0.217054	-0.24508	-0.0735236	0.189464	0.18982	0.135401	0.0997471	-0.0419072	0.349762	-0.212461	-0.622953	-0.185384	-0.516906	0.302674	-0.72532	0.0887504	0.331336	0.0412576	-0.00802636	-0.182395	0.139147	0.331947
15031	b0907	phosphoserine aminotransferase (NCBI)	-0.0791181	-0.44186	-0.31485	-0.591202	-0.248898	-0.259762	-0.4373	-0.55968	-0.407094	-0.416883	-0.137029	-0.47482	-0.45493	-0.473722	-0.335471	-0.712711	-0.456049	-0.413228	-0.439583	-0.42715	-0.34502	-0.511308	-0.480973	-0.0694176	-0.517951	-0.542406	-0.77712	-0.519169	-0.422527	-0.423055	-0.398953	-0.513093	-0.666828	-0.780783	-0.644864	0.37022	0.656926	0.256075	-0.259718	-0.014417	-0.356682	-0.348796	0.296896	-0.24406	0.545068	-0.339495	-0.464944
15032	b0908	3-phosphoshikimate 1-carboxyvinyltransferase (NCBI)	-0.0212871	1.57536	1.59997	1.37427	0.648816	1.38399	1.60195	1.54265	1.68352	1.72471	1.55598	1.70832	1.72617	1.70749	1.63403	1.46949	1.73048	1.75745	1.74076	1.77445	1.73396	1.69058	1.68694	1.42505	1.45062	1.57891	1.29156	1.03326	1.70968	1.71826	1.66442	1.62018	1.42363	1.34115	0.912724	0.616466	0.705137	1.05918	0.209354	-0.387309	1.43811	1.3815	1.37079	1.38818	1.02924	1.35416	1.47658
15033	b0909	putative heat shock protein (VIMSS)	-0.185357	-0.360708	0.0605318	-0.437536	-1.04867	-0.589045	-0.081532	-0.233413	-0.045167	-0.0404456	-0.133881	-0.0933909	0.210732	-0.0948555	-0.168956	-0.333963	-0.0744364	-0.049082	-0.0610286	-0.0430282	-0.0809396	-0.125866	-0.115212	-0.38558	-0.445907	-0.187139	-0.386495	-0.515219	-0.0551234	-0.0547537	0.102067	-0.152459	-0.328846	-0.299564	0.0964419	-0.346234	0.242904	-0.314646	0.215649	0.105476	-0.094983	-0.293397	-0.00637604	-0.298501	0.00396494	3.43641	0.583036
15036	b0912	integration host factor subunit beta (NCBI)	0.0489685	0.593359	0.646745	-0.0265969	-0.169098	-0.339322	-0.247773	-0.368031	-0.222176	-0.225038	0.8712	-0.27777	-0.257945	-0.276675	-0.356434	0.782241	-0.258425	-0.215351	-0.242455	-0.227588	-0.268577	-0.314313	-0.302617	0.373853	-0.111871	0.667025	1.02155	-0.0165141	0.786541	0.78818	0.733619	0.698065	1.36803	0.429708	0.91311	0.80807	1.17975	0.253208	0.707315	1.10173	1.30908	0.759079	0.789632	0.75964	0.346553	0.664883	-0.692225
15037	b0913	orf, hypothetical protein (VIMSS)	0.0182455	-0.698292	-0.449358	-0.578276	-0.472584	-0.486704	-0.506962	-0.685578	-0.622448	-0.628066	-0.71555	-0.43001	-0.666992	-0.428198	-0.648222	-0.853123	-0.666702	-0.620133	-0.647023	-0.592376	-0.634715	-0.654686	-0.711548	-0.634073	-0.728964	-0.632487	-0.0994815	-0.605522	-0.500443	-0.499254	-0.552274	-0.597083	0.0303322	-0.25943	-0.463403	-0.37306	0.126648	-0.576247	-0.843911	0.102691	-0.813211	-0.510575	-0.689456	-0.462314	-0.569538	-0.597182	-0.219818
15040	b0916	hypothetical protein (NCBI)	0.0455609	-0.29605	-0.410948	-0.328466	0.157975	-0.121004	-0.250508	-0.299705	0.14778	-0.236602	-0.360568	-0.295586	-0.277263	-0.202027	-0.287398	-0.291703	-0.277244	-0.230768	-0.257387	-0.248004	-0.166244	-0.334847	-0.266562	-0.589064	-0.599941	-0.205201	-0.44023	-0.59642	-0.0575515	-0.057213	-0.11398	-0.162597	-0.201061	-0.308071	-0.493857	0.447265	-0.434126	-0.606221	-0.00650121	-0.25278	-0.133619	-0.239504	-0.310293	-0.376678	0.19268	-0.19065	0.0990198
15043	b0919	hypothetical protein (NCBI)	0.0498994	0.334086	0.242876	0.0133029	-0.557091	0.0397	0.430538	0.42709	0.472815	0.476345	0.33548	0.40513	0.446331	0.420276	0.39429	0.185298	0.438324	0.473034	0.458163	0.475792	0.441532	0.386378	0.722445	0.124156	0.778135	0.6323	0.160577	0.00067439	0.610128	0.613319	0.562872	0.588706	0.324049	0.452424	0.425598	0.412881	0.220036	0.133342	-0.585482	-0.308543	0.244203	0.306133	0.293904	0.233237	0.345573	0.346635	-0.505809
15044	b0920	conserved inner membrane protein (NCBI)	-0.318491	-0.30192	0.278769	-0.361234	-1.04391	0.145615	-0.275699	0.312259	-0.232323	-0.216818	-0.364146	-0.256444	-0.238361	-0.261459	-0.346095	-0.0634587	-0.235999	-0.188576	-0.217978	-0.199472	-0.238037	-0.287401	-0.282712	0.539626	-0.0883081	-0.147088	0.441691	0.974178	0.000402454	0.00366912	-0.053425	-0.0142351	-0.272577	-0.363458	1.01968	-0.436617	-0.603608	-0.851025	-0.231845	-0.0708895	-0.748738	-0.744081	-0.705398	-0.206712	-1.17129	0.214579	1.16093
15045	b0921	predicted S-adenosyl-L-methionine-dependent methyltransferase (NCBI)	-0.112589	0.867631	0.581695	0.693061	0.0535123	0.381781	0.637746	0.480214	0.947368	0.687185	1.27838	0.82016	0.659181	0.636174	0.761362	0.750069	0.701739	0.707615	0.679255	0.694264	0.821145	0.607031	0.61496	0.49774	0.539187	0.920567	1.00348	0.406258	0.861422	1.28557	0.806664	0.758226	0.777736	0.790311	0.551276	0.468774	1.02934	0.581049	0.0270257	-0.224813	0.554922	0.559503	0.595754	0.693649	0.388377	0.48347	0.0782176
15049	b0925	predicted carboxypeptidase (NCBI)	-0.0950301	-0.0210305	-0.0901387	0.0423955	-0.686101	1.16937	0.113332	0.000379883	0.154006	0.156632	0.0193746	0.0850909	0.284673	0.100191	0.0170994	0.0525283	1.77469	1.85862	0.181404	0.212187	0.445357	0.0662697	0.0817197	0.138109	0.197288	0.159898	-0.0570393	-0.0270864	0.299877	0.302223	0.251869	0.293106	0.127379	0.304893	0.132418	-0.260171	0.0384884	-0.320042	-0.0792619	0.181949	-0.0612562	-0.171812	-0.12797	-0.0764794	-0.414732	0.283617	1.0841
15050	b0926	hypothetical protein (NCBI)	-0.0436527	-0.563125	-0.679227	-0.7123	-0.0776253	-0.20767	-0.874601	-0.800739	-0.840442	-0.842902	-0.975071	-0.917919	-0.876678	-0.903003	-0.986194	0.222091	-0.902189	-0.850379	-0.864787	-0.848613	-0.882832	-0.938184	-0.921455	-0.809183	-1.24804	-0.825229	-0.967664	-0.658125	-0.685043	-0.682256	-0.732663	-0.798057	-0.971908	-0.814485	-0.0295105	1.10603	0.739376	-0.723711	-0.0355811	-0.387667	-0.597401	-0.948869	-0.892717	-0.651856	-0.896752	-0.363312	-1.45957
15051	b0927	predicted metal-binding enzyme (NCBI)	-0.319406	1.09289	1.06508	0.999385	0.140917	0.587084	1.14842	1.05225	1.22123	1.25572	1.08611	1.21105	1.25192	1.52312	1.14392	1.00043	1.22972	1.283	1.26427	1.29463	1.25809	1.20412	1.27915	0.95441	1.19416	1.32241	1.15666	1.1285	1.46164	1.46932	1.41838	1.35342	1.17923	1.08726	1.48908	0.911328	1.91193	0.859323	0.482637	-0.910423	1.38852	1.42267	1.39258	1.37267	0.963586	1.46074	-0.0815654
15052	b0928	aspartate aminotransferase, PLP-dependent (NCBI)	-0.741375	-0.662032	-0.304255	0.0119891	-0.204025	-0.287654	-0.300174	0.139817	-0.265356	-0.267665	-0.399933	-0.244366	-0.30151	-0.32775	-0.410915	0.162502	-0.327095	-0.275292	-0.289679	-0.273579	-0.307689	-0.363016	-0.346201	-0.5199	-0.253045	-0.570412	-0.362529	-0.911002	-0.430107	-0.429633	-0.479779	-0.405504	-0.41665	0.293128	0.185663	0.284569	-0.243626	-0.5176	-0.285997	0.00765567	-0.249748	-0.534347	-0.481797	-0.38549	-0.581751	-0.299559	0.0583774
15053	b0929	outer membrane porin 1a (Ia;b;F) (NCBI)	0.0782474	0.664209	0.383445	0.275914	0.659858	0.358728	0.731097	0.58038	0.774583	0.787233	0.642965	0.743459	0.761603	0.738685	0.727968	0.509312	0.753913	0.810386	0.7817	0.797761	0.878515	0.710486	0.717457	0.644768	0.39347	12.1287	12.7295	12.6224	0.681837	0.685369	0.634884	0.569688	0.454997	0.390949	0.336217	0.90327	-0.0892144	0.14625	-0.166656	-0.340131	0.641938	0.381059	0.652811	1.34504	0.174575	1.47294	2.47492
15055	b0931	nicotinate phosphoribosyltransferase (NCBI)	-0.399303	0.749075	0.824167	0.556163	0.266686	0.682251	1.13692	1.02516	1.20147	1.23144	1.09816	1.18709	1.20665	1.35313	1.10934	0.957345	1.2049	1.26382	1.24196	1.24859	1.50185	1.157	1.16259	0.902822	0.985016	1.3147	1.46849	0.933609	1.46263	1.46967	1.41216	1.40772	1.19318	1.16079	1.25543	0.837908	1.12469	1.28258	0.670546	0.0959178	1.51074	1.50686	1.51004	1.51351	1.09838	1.13506	1.9994
15056	b0932	aminopeptidase N (NCBI)	-0.125022	0.332744	0.425322	0.228475	0.220119	0.497781	0.562621	0.529795	0.605925	0.83352	1.15836	0.55524	0.574994	0.55097	0.527263	0.675194	0.571487	0.629644	0.680258	0.609344	0.689454	0.638584	0.592919	0.484336	0.631684	0.291791	0.409244	0.124442	0.440512	0.441856	0.403966	0.336429	0.369711	0.408206	0.678349	0.197768	-0.343693	0.165555	0.424555	0.0689069	0.492139	0.459618	0.502589	0.537051	0.730357	0.585463	-0.782421
15057	b0933	alkanesulfonate transporter subunit (NCBI)	-0.315623	0.510904	0.520516	0.396175	0.0683761	-0.00488587	0.584689	0.479461	0.62498	0.635691	0.516676	0.582372	0.609771	0.578495	0.504654	0.346616	0.597406	0.653945	0.644024	0.640576	0.597993	0.544669	0.57116	0.555839	0.228379	0.661274	0.636529	-0.0974932	0.71042	0.94509	0.65336	0.612578	0.434929	0.443621	0.187242	-0.388041	0.748883	0.201318	0.528764	-0.197546	0.434172	0.436404	0.468893	0.440633	0.253481	0.443254	-1.17815
15058	b0934	putative transport system permease protein (VIMSS)	0.507855	0.333773	0.342172	1.44983	1.4545	-0.188467	-0.0414768	-0.135174	0.00195803	0.015448	-0.0959886	-0.0420755	-0.0100313	-0.0369387	-0.119983	1.42162	-0.0186685	0.0364978	0.0207846	0.0180101	-0.0127584	-0.0764864	-0.0283083	-0.330629	0.645971	-0.345423	-0.795936	-1.00187	-0.193566	-0.195117	-0.25065	-0.286158	-0.471864	-0.513086	-1.07575	-0.789097	0.749729	0.703165	0.0532508	-2.30827	0.0350848	0.0406375	0.0783673	0.0399565	0.779713	-0.273341	-2.5494
15059	b0935	alkanesulfonate monooxygenase (NCBI)	-0.0215114	-0.526572	-0.888738	-1.11232	-1.90076	-0.723769	-0.229576	-0.363619	-0.20834	0.0717618	-0.304525	-0.0801176	-0.250944	-0.267163	-0.28866	-0.290828	-0.244413	-0.210514	-0.218099	-0.206483	-0.253448	-0.317166	-0.0792212	-0.488572	-0.643625	0.105925	0.181759	-0.97493	-0.166969	-0.167897	-0.224403	-0.0730833	-0.367602	0.327569	-0.060717	-0.84412	-0.227231	-0.0501459	-0.736404	-0.0397589	-0.0421185	-0.23674	0.211187	-0.483656	-0.153183	-0.491599	0.491348
15060	b0936	orf, hypothetical protein (VIMSS)	0.0390602	-1.28979	-1.27699	-0.486072	-0.637229	-0.681439	-1.02724	-0.966229	-1.00914	-1.00248	-1.10979	-1.07713	-1.04103	-1.06098	-0.541029	-1.30726	-1.03506	-1.00429	-1.01965	-1.00424	-0.481008	-1.02135	-1.06535	-0.750226	-0.836081	-0.93002	-0.372918	-0.842007	-1.05844	-1.05959	-1.11608	-1.04407	-0.122812	-0.530142	0.192341	-0.649472	0.241707	-1.28433	-0.159042	-0.347663	-1.17029	-1.37003	-0.929879	-1.36616	-0.663077	-1.1039	0.73894
15061	b0937	NAD(P)H-dependent FMN reductase (NCBI)	0.296701	2.38995	2.37802	3.17951	2.40463	1.81464	1.90362	2.33078	2.01015	2.09951	1.90839	2.09005	2.12538	2.0988	2.00792	2.63876	2.13816	2.17199	2.14761	2.19232	2.13706	2.08424	2.10278	2.60568	2.16566	1.73433	2.03453	1.54308	1.85407	1.86902	1.81074	1.78558	1.6205	1.55051	0.962576	0.763102	0.56522	1.56704	0.0947404	-0.180414	1.65231	1.65192	1.62274	1.6642	1.32327	1.72597	-0.614561
15062	b0938	putative fimbrial-like protein (VIMSS)	-0.107736	1.55012	1.55677	1.32504	0.927194	1.19234	1.48162	1.55942	1.5432	1.58778	1.44207	1.54115	1.57693	1.59335	1.67141	1.49804	1.58567	1.6177	1.5986	1.62605	1.57359	1.5017	1.56164	1.32257	1.26525	1.70283	1.8654	2.00456	1.82322	1.83029	1.7738	1.74834	1.86491	1.77214	1.43692	1.63183	1.26572	2.06666	0.727759	0.253934	1.96245	1.96547	1.94532	1.97541	1.7472	1.66411	0.70378
15063	b0939	predicted periplasmic pilin chaperone (NCBI)	-0.0580577	1.48803	1.50112	1.42908	1.05874	1.2177	1.59233	1.67672	1.66478	1.71991	2.59713	1.66656	1.71134	1.69623	1.59932	2.75711	1.72243	1.75832	1.74488	1.77584	1.67346	1.65341	1.69572	1.49441	1.56684	1.76085	1.58291	1.44601	1.89369	1.90328	1.84376	1.90804	1.63443	1.80045	1.15124	1.03388	1.02735	1.1049	0.0829049	-0.184083	1.54437	1.57515	1.56618	1.65613	1.73869	1.53298	0.559439
15064	b0940	predicted outer membrane usher protein (NCBI)	0.0248337	0.951478	0.963011	0.848675	0.455675	0.691487	1.09875	1.03358	1.15516	1.1941	1.05403	1.14781	1.17124	1.16708	1.22581	1.1105	1.18058	1.21571	1.2045	1.22793	1.22989	1.10617	1.18981	0.921152	0.876817	1.10466	1.04876	0.851328	1.19949	1.20415	1.14518	1.17321	0.927125	0.996404	0.664419	0.715029	0.177484	0.753957	0.168121	0.0301133	0.951473	0.921962	0.925164	0.920921	0.597812	1.12326	-0.300407
15065	b0941	predicted fimbrial-like adhesin protein (NCBI)	-0.00542214	0.74798	0.930743	0.677315	0.992748	0.339449	0.611181	0.522924	0.657898	0.67321	0.849451	0.621623	0.648446	0.621704	0.772007	0.873985	0.639749	0.69493	0.679168	2.70015	0.857744	0.860176	1.0205	0.94436	0.373596	0.646687	0.628161	0.482478	0.548724	0.551617	0.492843	0.633223	0.457514	0.804908	0.58694	0.847579	0.423035	0.463918	-0.110563	0.0312024	0.789576	0.798626	0.716226	0.809792	0.732195	0.610848	1.76035
15066	b0942	predicted fimbrial-like adhesin protein (NCBI)	-0.099421	-0.469287	-0.443228	-0.665842	0.375395	-0.402767	-0.658904	-0.806059	-0.640512	-0.649343	0.113538	-0.717413	-0.68984	-0.576243	-0.80138	-0.950784	-0.703741	-0.647876	-0.655802	-0.665694	-0.345936	-0.761184	-0.728795	-0.565059	-0.721674	-0.473938	0.184539	-0.618235	-0.326134	-0.326681	-0.384301	-0.424338	-0.600582	-0.314442	-0.542989	0.40578	-0.623609	-0.917931	-0.106101	0.0430507	-0.568443	-0.320243	-0.512066	-0.559991	-0.227707	-0.257874	1.34388
15067	b0943	putative fimbrial-like protein (VIMSS)	0.288204	0.866374	0.855343	0.798217	0.229901	0.517519	0.980085	1.02288	1.03939	1.06397	0.897899	1.01509	4.51916	1.01347	0.926381	4.08748	1.03241	1.14828	1.07798	1.0744	1.12248	0.983079	0.973686	0.729965	1.23437	0.99539	0.531098	0.540537	1.13449	1.14413	1.08394	1.04572	1.32071	0.933097	0.688525	1.13342	1.09102	1.13917	0.803158	0.0508889	1.06601	1.55941	1.07147	1.06245	0.628191	1.5461	1.36055
15068	b0944	putative chaperone (VIMSS)	-0.186311	0.101158	-0.129317	0.0257288	0.933092	0.554154	0.37619	-0.173979	-0.0250813	-0.0173243	-0.166403	-0.0786821	0.237067	0.210159	-0.0951976	-0.0475087	-0.0624181	-0.00428471	-0.0157344	-0.02471	-0.0681303	-0.0814737	-0.10344	0.144326	0.669513	0.00327823	0.214416	0.289452	0.13946	0.14057	0.0857959	0.048281	-0.138996	-0.185262	-0.0928611	-0.0302913	-0.773598	0.236279	0.122762	-0.0540572	-0.335315	-0.325442	-0.29388	-0.205758	0.277196	2.32968	-0.136704
15069	b0945	dihydroorotate dehydrogenase (NCBI)	-0.100985	2.61312	1.19787	1.19143	0.91652	0.802145	1.55989	1.47822	1.63111	1.67029	1.49905	1.64786	1.6842	1.73637	1.55907	1.57224	1.66043	1.71792	1.70579	1.71207	1.67188	1.66033	1.62634	1.48449	1.34429	1.27325	1.1448	1.11391	1.35277	1.40583	1.37789	1.30394	1.15096	1.09633	0.929698	0.512126	0.603637	0.653835	0.526245	0.232134	1.12572	1.08451	1.79779	1.17671	0.668719	1.25512	0.267835
15070	b0946	orf, hypothetical protein (VIMSS)	-0.160391	1.51059	1.49781	1.57146	0.581936	0.971538	1.84938	1.76304	1.92613	1.9689	1.79413	1.94822	1.96609	1.94749	1.85979	2.07521	1.96074	2.01828	2.006	2.0127	1.97272	1.92494	1.92695	1.71424	1.60104	2.14758	1.88936	1.3628	2.15339	2.16336	2.10626	2.04384	1.90721	1.79285	1.26236	0.900264	0.76181	1.54424	1.23768	0.201313	1.75642	1.7617	1.7373	1.74492	1.34149	2.04762	0.0362348
15071	b0947	predicted 2Fe-2S cluster-containing protein (NCBI)	0.0490501	-0.0810955	-0.0589069	-0.149379	-0.253106	-0.06519	0.297866	0.124912	0.329884	0.332011	0.612453	0.278341	0.29785	0.2752	0.417541	0.094773	0.289791	0.345886	0.337864	0.330767	0.273694	0.712609	0.254018	0.259539	0.100979	0.0754073	-0.42647	0.00853831	0.170271	0.171231	0.08651	0.320115	-0.0820258	0.032207	-0.0907651	0.0215063	0.404018	-0.0426898	-0.52029	0.422087	0.147559	0.147509	0.18202	0.119086	0.133241	0.169718	0.757581
15072	b0948	predicted methyltransferase (NCBI)	-0.0484481	-0.0204855	0.172101	0.226549	-0.174851	-0.176509	0.282314	-0.0334606	0.163811	0.170702	0.026372	0.256554	0.148197	0.159479	0.140434	0.179625	0.118874	0.170994	0.164315	0.174798	0.112976	0.191688	0.218461	0.0159226	0.195843	4.23075e-05	-0.0810896	-0.332774	0.136069	0.136519	0.211225	0.190552	-0.0666814	0.0763707	0.467857	-0.078758	-0.031143	-0.000436258	0.236748	-0.112443	0.3064	0.542668	1.3559	1.56141	0.0241753	0.0217586	0.00596564
15073	b0949	fused predicted transporter subunits of ABC superfamily: ATP-binding components (NCBI)	-1.09369	0.217488	0.277001	0.377792	-0.467162	-0.247432	0.347209	0.200587	0.386082	0.599975	0.258572	0.335504	0.374131	0.348234	0.268894	0.108845	0.353362	0.398896	0.390993	0.382901	0.346722	0.317512	0.524936	0.248905	0.0856108	0.436628	0.0128538	0.0027812	0.511551	0.514161	0.529899	0.39837	0.356445	0.362391	0.185022	-0.506368	-0.188379	0.36715	0.716274	0.159004	1.56049	0.116178	0.355067	0.0811402	-0.092954	0.078572	-0.686918
15074	b0950	paraquat-inducible membrane protein A (NCBI)	0.215318	0.267852	0.389613	0.0536036	0.511325	0.72102	0.0446745	0.05711	0.0839989	0.088561	-0.0389587	0.0351591	0.214335	0.20493	0.178296	0.00399642	0.0581215	0.102841	0.0945994	0.0912587	0.0532743	0.0694436	0.0343068	-0.25669	0.271302	0.153902	-0.0945277	-0.200929	0.290768	0.295286	0.211936	0.175283	0.198134	0.254579	-0.150756	0.154763	-0.310945	-0.334206	-0.275094	-0.382139	0.0633068	0.0742752	0.0869405	0.0308561	-0.118916	0.314463	0.107248
15075	b0951	paraquat-inducible protein B (NCBI)	0.14492	0.563314	0.463989	0.379262	0.235747	0.452063	0.535786	0.39661	1.22907	0.579264	0.446678	0.525441	0.552625	0.538182	0.679447	0.922289	0.550417	0.601227	0.565167	0.582961	0.743591	0.547662	0.647401	0.294916	0.512818	0.421683	0.0550436	0.30461	0.464489	0.467411	0.382484	0.34627	0.453953	0.730351	0.750021	-0.281065	0.357693	-0.0783115	-0.225479	-0.244972	0.427261	0.706655	0.269883	0.376939	-0.0687961	0.589246	-0.275053
15076	b0952	conserved protein (RefSeq)	0.180664	0.324504	-0.360182	-0.489057	-0.0669682	-0.483627	-0.604663	-0.124665	-0.566304	-0.593896	-0.345077	-0.657365	-0.630766	-0.635649	-0.745682	-0.26589	-0.635035	-0.607791	-0.612129	-0.599042	2.11156	-0.130929	-0.0966372	-0.270431	1.97708	-0.626802	-0.582166	-0.232719	-0.505158	-0.508337	-0.568171	-0.322692	-0.493723	-0.110661	-0.0859463	-0.513404	-0.6555	0.196361	0.233591	0.245696	-0.195707	-0.425576	-0.394982	-0.262928	-0.551875	-0.3463	-0.95525
15077	b0953	ribosome modulation factor (NCBI)	0.315896	0.427617	0.444742	0.23543	-0.809957	-0.0914399	0.450104	0.339531	1.34868	0.512062	0.379919	0.467859	0.494227	0.489828	0.380123	0.530819	0.492051	0.520194	0.513202	0.534899	0.488202	0.460409	0.451338	0.192204	0.130223	0.959835	0.493871	0.226922	1.08015	1.09046	1.02505	0.995202	0.817912	0.697677	0.876957	0.153781	-0.715825	1.20839	-1.90003	-0.554318	0.466139	0.455403	0.364376	0.434619	1.45318	0.299028	-1.94858
15079	b0955	predicted peptidase (NCBI)	0.05453	0.212888	0.230935	0.120721	0.851902	0.340958	0.376122	0.400375	0.582161	0.425336	0.47229	0.376505	0.402928	0.424989	0.288586	0.65755	0.400281	0.428212	0.421846	0.441526	0.506781	0.462381	0.359915	0.504352	0.381614	0.491618	0.129325	0.207483	0.522027	0.522144	0.457882	0.427709	0.34103	0.243465	0.131348	0.0305309	-0.383057	0.300317	-0.107297	0.262782	0.306988	0.400928	0.38467	0.329698	-0.00667179	0.264644	0.262983
15081	b0957	outer membrane protein A (3a;II*;G;d) (NCBI)	0.00419015	1.15298	1.54618	0.963369	0.356157	1.12957	0.747934	0.640903	0.825913	0.812328	0.683521	0.757409	1.16758	0.779805	0.664792	0.54479	0.770727	0.80971	0.805515	0.822575	0.771826	0.743434	0.730707	0.483767	0.606518	1.63974	1.17467	1.16004	1.76122	1.76845	1.68526	1.63974	1.49025	1.37849	0.891648	-0.0546454	-0.147506	1.40329	-0.0259413	-0.0940527	0.74786	0.753706	0.770256	0.718602	0.417815	1.32425	-0.402392
15082	b0958	SOS cell division inhibitor (NCBI)	-0.012483	-0.953127	-0.849322	0.567475	0.318795	-0.682464	-0.585351	-0.501188	-0.502894	-0.509566	0.274963	-0.557482	-0.529854	0.0218875	-0.644683	-0.215047	-0.543212	-0.50386	-0.509133	-0.488488	-0.540206	-0.0723225	-0.576913	-0.830502	-0.389313	-0.104431	-1.05377	-1.37088	-0.497836	-0.495062	-0.577756	-0.19013	-0.773352	-0.866504	-0.078727	-0.546042	-0.0429479	0.702189	-0.267431	-0.211873	-0.296617	-0.291433	-0.278708	0.193576	-0.139725	-1.01718	1.11957
15083	b0959	hypothetical protein (NCBI)	-0.0747845	-0.663214	-0.273004	-0.84731	0.16056	0.177578	-0.30817	-0.176259	0.0158104	-0.263622	-0.383638	-0.324344	-0.0960612	-0.30217	-0.417319	0.0591965	-0.311442	-0.272703	-0.276171	-0.26141	-0.311941	-0.340596	-0.351236	-0.599838	0.235525	-0.388143	-0.84738	-0.651227	-0.265328	-0.265845	-0.348169	0.135376	-0.551311	-0.653305	-0.811959	-0.0944179	-0.489514	-0.286157	-1.19867	-0.0875024	-0.112143	-0.386349	-0.348148	0.63436	-0.252801	-0.153462	0.914918
15084	b0960	orf, hypothetical protein (VIMSS)	0.00114698	-0.311093	-0.214403	-0.162875	-0.548942	-0.121396	-0.142617	-0.204569	-0.0796437	-0.0988151	-0.123108	-0.160546	-0.0792483	-0.041749	0.0200596	-0.00299587	-0.147792	-0.109112	-0.112407	-0.0982391	-0.15295	-0.115538	-0.185907	-0.368554	-0.414417	0.733037	-0.303675	-0.559326	-0.0323172	-0.0341778	-0.107527	-0.104012	-0.294266	-0.0673132	-0.156618	-0.283871	0.319995	-0.246187	-0.0472117	-0.418353	-0.0343674	0.20685	0.253506	-0.0121753	-0.0406449	0.120786	0.459167
15085	b0961	conserved inner membrane protein (NCBI)	-0.177708	-0.0890757	-0.613098	-0.817758	-0.708613	-0.302546	-0.263811	-0.420066	-0.21041	-0.238598	-0.341127	-0.307378	-0.279495	-0.286319	-0.400473	-0.320599	-0.295342	-0.256992	-0.259315	-0.248294	-0.302404	-0.327036	-0.0526877	-0.586112	-0.651943	-0.461645	-0.564374	-1.18586	-0.327618	-0.332739	-0.417654	-0.456121	-0.0432724	-0.121559	-0.0195999	-0.465199	-0.750496	-0.746213	-1.24038	-0.530979	-0.563169	-0.551147	-0.507893	-0.584589	0.156062	-0.655485	1.37957
15086	b0962	DNA helicase IV (NCBI)	0.14295	0.629178	0.650838	0.437774	-0.459697	0.367408	0.823028	0.707922	2.21786	0.880346	0.752233	0.953496	0.858912	0.851402	0.744772	0.820693	0.856247	0.881975	0.877755	0.897659	0.845139	0.823458	0.805176	0.665469	0.679981	1.03535	0.408436	0.387355	0.991733	0.994857	0.912128	0.900771	1.19952	0.608498	0.640752	0.633793	-0.137248	0.657737	0.0827125	-0.371235	0.77043	0.77429	1.06894	1.18104	0.723418	0.739511	0.752333
15087	b0963	methylglyoxal synthase (VIMSS)	-0.31124	-0.455477	-0.493624	-0.843768	-0.76169	-0.980791	-0.345334	-0.351915	-0.277662	-0.169923	-0.408687	-0.348391	-0.320653	-0.285839	-0.44129	-0.564562	-0.335088	-0.296422	-0.300175	-0.283641	-0.149911	-0.363017	-0.375286	-0.548596	-0.691382	-0.541106	-0.779178	-0.497485	-0.407226	-0.410212	-0.495366	-0.111813	-0.696423	-0.79246	0.104652	-0.343742	-0.637516	-0.90369	0.537157	-0.000712943	0.148568	-0.404657	-0.385475	-0.435818	-0.539356	-0.22036	-0.180136
15088	b0964	hypothetical protein (NCBI)	0.24651	-0.123866	-0.0990645	1.68618	0.212307	0.0105931	-0.363544	-0.487314	-0.298293	0.0499087	-0.422963	-0.364533	-0.344784	-0.341866	-0.455875	-0.155169	-0.361387	-0.331749	-0.317569	-0.299697	-0.409158	-0.377811	-0.389846	-0.639552	0.142339	-0.179863	0.0633064	0.0770079	-0.0473184	-0.0436379	-0.142101	-0.166694	0.0335497	-0.2873	-0.0493483	0.586021	-1.0611	-0.45832	-0.18583	0.0126878	-0.233553	-0.225895	-0.195895	-0.252632	0.0798553	0.679353	2.08939
15089	b0965	orf, hypothetical protein (VIMSS)	-0.455923	-1.2203	-1.1904	-1.33035	0.404207	-1.54166	-0.489634	-0.61759	-0.43744	-0.475704	-0.554667	-0.538347	-0.518412	-0.494023	-0.601295	0.310512	-0.550596	-0.526138	-0.505358	-0.493434	-0.574555	-0.533392	-0.545494	-0.71801	-0.764399	-0.864742	-1.14506	-1.37081	-0.755941	-0.758722	-0.856462	-0.866491	-0.996748	-1.05686	1.40897	-1.42662	-1.39831	-1.22654	-2.2221	-0.471788	-0.891494	-0.88076	-0.840484	-0.89155	-1.10247	-0.798968	-0.436781
15090	b0966	DNA-binding protein, hemimethylated (RefSeq)	-0.120167	-0.360571	-0.0823422	-0.411854	0.22286	-0.585494	-0.140763	0.182473	-0.0654389	-0.0720409	-0.190181	-0.112765	-0.093127	-0.0898562	-0.170726	0.308449	-0.0808419	-0.0830985	-0.065826	-0.0436674	-0.153758	-0.0411249	-0.141183	-0.388017	0.0734979	-0.27215	-0.564945	-0.377283	-0.139627	-0.137047	-0.235385	0.060566	-0.196849	-0.514306	0.394701	-0.105753	0.563653	-0.687972	-0.636659	0.0181849	-0.371218	-0.2294	-0.332879	-0.265044	-0.262584	-0.326424	-0.806642
15091	b0967	predicted methyltransferase (RefSeq)	0.0935094	-0.232007	-0.194372	0.155514	0.208319	-0.487663	0.0403926	-0.115265	0.409312	0.0829776	-0.0187225	0.0156361	0.0429544	0.0195276	-0.0632258	0.652397	0.0294188	0.0441112	0.0733903	0.0848344	0.0427816	0.0123636	-0.00165312	0.0672017	-0.0896126	0.123405	-0.259308	-0.436227	0.125203	0.124106	0.0265287	0.260865	-0.192645	-0.0733117	-0.0457738	-0.222233	-0.438624	-0.0824974	-0.658346	-0.217709	0.208852	0.0857863	0.101073	0.055011	0.285409	-0.199471	0.289435
15092	b0968	predicted acylphosphatase (NCBI)	0.184923	1.3814	1.41239	1.19411	1.05381	1.19478	1.54593	1.48733	1.64935	1.68084	1.53614	1.64979	1.6779	1.63122	1.57384	1.44373	1.65663	1.68408	1.68764	1.71305	1.62497	1.66462	1.62384	1.39219	2.025	2.0087	1.8894	1.27818	2.13434	2.16055	2.0687	2.05223	1.82793	1.73241	1.26237	0.695067	0.930433	1.09492	0.850158	0.833241	1.52442	1.54885	1.50734	1.52731	1.91235	1.7946	0.813111
15094	b0970	inner membrane protein (NCBI)	0.213605	0.682871	0.927523	0.409637	-0.0937025	0.377356	0.50107	0.389229	0.577873	0.585617	0.466624	0.592638	0.574232	0.528734	0.472511	0.325368	0.553842	0.575042	0.575204	0.595035	0.75501	0.542938	0.518065	0.27516	0.655221	0.681938	1.06466	-0.0424344	0.801027	0.807393	0.719821	0.70602	0.50374	1.09132	0.849785	0.327916	0.329752	1.23101	-1.3229	0.672582	0.769926	0.806434	0.790476	0.789753	0.559201	0.619395	-0.149001
15095	b0972	hydrogenase 1, small subunit (NCBI)	0.019359	-0.778847	-0.742168	-0.943093	-1.03605	-0.455475	-0.807945	-0.554012	-0.769046	-0.760061	0.319928	-0.832475	-0.780177	-0.513151	-0.666087	0.012745	-0.80692	-0.786083	-0.78136	-0.766394	-0.85449	-0.83116	-0.732821	-1.01479	-0.575242	-0.683387	-0.923007	-1.39723	-0.573001	-0.57344	-0.651657	-0.6658	-0.866783	-0.567026	-0.721938	0.0395568	-0.78768	-1.08682	0.021346	-0.211335	-0.726555	-0.516363	-0.663546	-0.748207	-0.775444	-0.590652	-0.0661244
15096	b0973	hydrogenase 1, large subunit (NCBI)	0.0468471	0.330225	0.427086	0.334737	-0.149163	-0.112749	0.436939	0.30081	0.486396	0.503605	0.388389	0.436706	0.488943	0.441947	0.590545	0.239291	0.462623	0.483694	0.487721	0.504895	0.416646	0.440249	0.432619	0.349393	0.17691	0.376597	0.201313	0.00177842	0.486542	0.488969	0.410434	0.546402	0.195126	0.238069	0.0458912	0.338819	0.259462	0.41942	-0.457825	0.443669	0.279633	0.397122	0.229354	0.331931	0.785077	0.363555	-0.627681
15097	b0974	hydrogenase 1, b-type cytochrome subunit (NCBI)	-0.218937	-0.0930873	-0.0610316	-0.253463	0.457745	0.0725504	-0.00252062	-0.133342	0.0644626	0.0634877	-0.0467273	-0.00354311	0.045508	-0.000292766	-0.0566699	-0.204317	0.0244883	0.0453798	0.0464529	0.0633322	-0.0198635	0.0112717	-0.010923	-0.255757	0.277913	0.783208	-0.1316	0.24398	0.435583	0.438011	0.358988	0.341481	0.145939	0.0507884	0.12544	0.00339755	-0.807995	-0.439968	0.937645	0.549643	0.0205725	0.0584389	0.0557808	0.0168954	-0.344208	0.393864	0.244582
15098	b0975	protein involved in processing of HyaA and HyaB proteins (NCBI)	-0.00306232	0.314257	0.277215	0.567379	0.599308	0.499174	0.98507	0.908345	1.07848	1.10224	0.965336	1.0663	1.19533	1.04753	0.990039	1.01056	1.07281	1.10007	1.10422	1.12781	1.08442	1.09475	1.04018	0.807151	0.721772	1.04239	0.825519	0.621183	1.15185	1.15956	1.07676	1.28557	1.14477	0.764586	0.439737	0.651615	0.304556	0.503541	0.0306631	-0.326033	0.969627	0.995848	2.01782	2.21146	1.33252	0.805422	0.777159
15099	b0976	protein involved in processing of HyaA and HyaB proteins (NCBI)	-0.255802	-0.379695	-0.343014	-0.272963	-0.896558	-0.623341	-0.0306126	-0.186665	0.0224774	0.00795918	-0.090039	-0.0564457	0.208001	-0.0525266	-0.135697	6.19213	-0.0549919	-0.0291827	-0.0207751	-0.0110464	-0.0965805	-0.0643087	-0.084863	-0.115047	0.0516059	-0.289967	-0.130025	-0.0549875	-0.179491	-0.179996	-0.261884	-0.280693	-0.480774	-0.0688145	-1.02244	-0.09374	-0.280532	-0.827654	-0.919811	-0.211642	-0.379235	-0.347681	-0.32335	-0.372394	-0.735909	-0.357697	-1.80995
15100	b0977	protein involved in nickel incorporation into hydrogenase-1 proteins (NCBI)	-0.287538	0.993697	0.419388	-0.0293969	-0.124877	0.199014	0.202484	0.0694553	0.275177	0.280147	0.162236	0.231686	0.257956	0.235634	0.153064	0.289959	0.234835	0.261408	0.267566	0.306752	0.197631	0.233661	0.203208	-0.0336998	-0.110237	0.341347	0.421991	0.263891	0.468749	0.472909	0.3787	0.390618	0.154519	0.176311	0.171852	-0.348685	-0.666979	-0.083441	0.496698	0.00673701	0.156419	0.185068	0.187969	0.159742	0.108188	0.375444	-0.757335
15101	b0978	cytochrome bd-II oxidase, subunit I (NCBI)	0.0584209	-0.0764681	-0.370004	-0.178572	-0.0713227	-0.433809	-0.259022	-0.255376	-0.206741	-0.214208	-0.317409	-0.267488	-0.252697	-0.244779	-0.0224367	0.183899	0.0904736	-0.251218	-0.222184	-0.204442	-0.315344	0.153505	-0.308516	-0.49372	0.00487722	-0.137471	-0.249963	0.286112	-0.00966157	-0.0105526	-0.104189	-0.0903128	-0.148357	-0.202525	-0.164189	0.165505	-0.0936741	0.107009	0.422151	-0.0434539	-0.0714103	-0.23474	-0.00693389	-0.263613	0.031318	-0.201209	-0.231494
15102	b0979	cytochrome bd-II oxidase, subunit II (NCBI)	0.00784952	0.341998	0.398047	0.534656	-0.298689	-0.157977	0.564904	0.43797	0.642029	0.645242	0.523306	0.596398	0.614412	0.619199	0.801239	0.380687	0.598645	0.624283	0.641704	0.664692	0.553312	0.585114	0.832054	0.53907	0.244725	0.682787	0.847196	0.209982	0.811794	0.814935	0.716537	1.11533	0.522844	0.403408	1.16883	0.886636	0.496487	0.144522	0.401868	0.191208	0.52729	0.332403	0.337997	0.306782	0.474254	0.607909	-1.13881
15104	b0980	phosphoanhydride phosphorylase (NCBI)	0.0134747	0.0505623	-0.119915	-0.214187	0.112984	-0.0343713	-0.0230485	-0.156052	0.042361	0.026685	-0.0751189	-0.0304915	0.117104	-0.00865949	-0.0232199	0.0916843	-0.0210471	-0.0033232	0.0141409	0.0306598	0.16223	0.892191	0.132828	0.0100159	-0.376802	-0.0865177	-0.255767	-0.24174	0.030882	0.0278127	-0.0573305	0.113283	-0.0655403	-0.139874	0.405942	-0.166753	-1.04686	-0.743125	-0.368921	-0.0981929	-0.0832852	0.0364551	-0.249164	-0.294974	0.246447	0.0172803	-0.303548
15105	b0981	cryptic autophosphorylating protein tyrosine kinase Etk (NCBI)	-0.170062	0.356083	0.528447	0.440666	0.192092	0.690711	0.546093	0.430858	0.620899	0.613272	0.503334	0.806457	0.698884	0.598089	0.574103	0.545244	0.571927	0.589916	0.606596	0.625638	0.591675	0.551586	0.527167	0.418249	0.501885	0.786386	0.238692	0.205399	0.590534	0.592799	0.494498	0.673633	0.301082	0.406634	0.430899	0.109254	-0.124851	0.497832	-0.748371	-0.254061	0.490242	0.615227	0.632029	0.820068	0.353859	0.584267	1.04013
15106	b0982	putative phosphatase (VIMSS)	0.0621127	-0.998173	-0.418413	-0.646603	-0.216615	-0.63647	-1.11844	-1.28561	-1.07712	-1.10248	-1.18797	-1.17553	-1.14761	-1.15039	-0.73852	-1.39027	-1.16373	-1.14658	-1.12742	-1.11638	-1.17174	-1.19	0.205047	-1.45832	-1.53245	-1.15469	-0.331072	-0.108406	-1.02496	-1.02703	-1.12485	-1.11237	-0.994671	-0.311073	-0.209382	-1.18375	-0.0268345	-1.27739	0.165131	0.500844	-0.927426	-1.21183	-0.724347	-1.23768	-0.379984	-0.712984	-1.61111
15107	b0983	predicted exopolysaccharide export protein (NCBI)	-0.0208877	-0.942463	-0.547694	-0.915812	-0.642756	-1.09188	-0.402186	-0.942016	-0.431416	-0.473219	-0.847605	-0.829728	-0.801835	-0.8072	-0.154983	-0.741908	-0.817722	-0.800465	-0.78454	-0.77095	-0.181228	-0.843244	-0.861268	-0.84902	-0.13499	-1.08868	-0.943972	-0.40859	-0.958974	-0.960639	-1.0585	-1.04602	-0.92808	-0.915555	-0.826649	-0.168652	-0.513138	-0.476483	-0.0303511	0.156906	-1.05235	-0.777734	-1.02266	-0.843013	-0.390961	-0.831751	0.517281
15108	b0984	hypothetical protein (NCBI)	-0.139461	-0.0872708	0.0980252	1.42683	0.33144	0.0220835	0.132767	0.00208134	0.27773	0.183645	0.200962	0.157468	0.221794	0.174853	0.437362	0.185382	0.135521	0.163367	0.201428	0.186697	0.130659	0.166652	0.126327	0.00138442	0.0921011	0.18089	1.12747	-0.121703	0.170271	0.171231	0.0862257	0.0857805	-0.0987455	0.202081	-0.108268	-0.0552939	-0.138539	-0.418165	-0.0318565	0.318615	-0.109625	-0.118547	0.00289096	-0.0768977	0.154688	0.045906	-0.0766254
15109	b0985	hypothetical protein (NCBI)	-0.0835442	-0.3172	-0.171977	0.313431	0.0633647	-0.327417	-0.361606	-0.501732	-0.318251	-0.319862	-0.415407	-0.385178	-0.35572	0.106209	-0.195792	-0.597085	-0.37095	-0.353415	-0.335395	-0.320681	-0.297582	-0.394572	-0.413738	0.102019	1.80146	-0.182459	2.67654	-0.490191	-0.0696461	-0.0670171	-0.0938126	-0.152675	-0.390952	-0.209253	-0.456275	0.0251898	-1.01553	-0.448551	-0.334729	-0.321866	-0.572185	-0.275027	-0.559458	-0.599808	-0.295021	0.276854	0.526589
15110	b0986	predicted outer membrane lipoprotein (NCBI)	-0.0173949	1.27231	1.30088	1.25002	0.903834	1.09581	1.28338	1.56072	1.37624	1.42202	1.27833	1.39495	1.43696	1.4197	1.41697	1.23783	1.41295	1.43231	1.44495	1.47721	1.4182	1.40191	1.37955	1.1995	1.2435	1.40244	0.998019	0.856344	1.42595	1.43432	1.33964	1.35801	1.21131	1.15508	1.74692	0.965327	1.08067	0.831629	0.432017	-0.265293	1.12878	1.27044	1.1087	1.11354	0.846746	1.43568	0.620663
15111	b0987	orf, hypothetical protein (VIMSS)	0.0816359	0.647044	0.162841	0.542498	0.310902	-0.0357356	0.346927	0.46052	0.402191	0.410925	0.304919	0.353279	0.382648	0.377709	0.404582	0.315069	0.368166	0.369533	0.403041	0.421068	0.541716	0.34706	0.518211	0.623807	-0.0197749	0.638431	-0.140641	0.0378867	0.467156	0.469538	0.375535	0.389523	0.151809	0.0329212	-0.0376979	0.738194	-0.238228	0.326657	0.469759	0.546065	0.850024	0.625483	0.802075	0.60274	0.314635	0.365871	-0.533931
15113	b0989	stress protein, member of the CspA-family (NCBI)	0.195945	3.43897	3.4546	3.22252	2.42111	2.8928	3.26774	3.33971	3.43263	3.51877	3.32318	3.5311	3.55801	3.55573	3.7155	3.3223	3.56387	3.58364	3.57962	3.6302	3.56705	3.55592	3.50869	3.27113	3.60424	3.26184	2.76532	2.7687	3.38342	3.39976	3.3042	3.31937	3.08044	2.98219	2.5232	1.71297	1.52993	2.07766	0.337613	-1.07252	2.57849	2.56806	2.51379	2.5506	2.12815	3.60938	1.7439
15115	b0991	cold shock gene (NCBI)	0.132362	1.40025	1.4293	1.22175	0.572467	1.00889	1.46843	1.69357	1.56589	1.59156	1.46459	1.55766	1.58512	1.80608	1.74707	1.34446	1.58661	1.60426	1.60652	1.63676	1.5804	1.61403	1.53985	1.74884	1.26875	1.71239	1.22574	1.39017	1.83568	1.84204	1.7476	1.91133	1.55576	1.50749	1.49689	1.27881	1.12625	1.20031	0.137062	0.0863004	1.70921	1.69705	1.63679	1.68068	1.46816	1.53602	-0.439575
15116	b0992	predicted 4Fe-4S membrane protein (NCBI)	0.128458	-0.574269	-0.517042	-0.555254	0.0493921	-0.740277	-0.288022	-0.404275	-0.227354	-0.235851	-0.328185	-0.293947	-0.266193	-0.228629	0.0552681	0.0915457	-0.267326	-0.250835	-0.24514	-0.226004	-0.231773	-0.00204543	-0.330165	-0.205719	-0.362645	-0.15138	-0.208261	-0.571709	-0.107642	-0.107828	0.0115646	0.0157743	-0.211009	0.112195	-0.580688	0.135825	-0.0861245	-0.529885	-0.173694	0.106337	0.142314	0.101347	-0.174502	-0.145364	0.106189	-0.315732	-0.00266053
15117	b0993	sensor protein torS (regulator TorR) (VIMSS)	0.0733723	-0.497623	-0.627574	-0.167164	0.357334	-0.279472	-0.904358	-0.644431	-0.855282	-0.874177	-0.955966	-0.761671	-0.751699	-0.764302	-0.817611	-0.907552	-0.914279	-0.898151	-0.891383	-0.489993	-0.627165	-0.731793	-0.953389	-0.876944	-0.35366	-0.772194	-0.249061	-0.29326	-0.778476	-0.780989	-0.874446	-0.727336	-0.707981	-0.597491	-0.535686	0.338876	-0.60132	-0.694362	-0.0290132	0.305842	-0.697884	-0.682927	-0.893226	-0.803044	-0.911843	-0.907581	-0.111987
15118	b0994	periplasmic sensory protein associated with the TorRS two-component regulatory system (NCBI)	0.139237	-0.730678	-0.365463	-0.895367	0.0554574	-0.157144	-0.495274	-0.653675	-0.46045	-0.486282	-0.56745	-0.551418	-0.527064	-0.529698	-0.411902	-0.288722	-0.527507	-0.504332	-0.502321	-0.490807	-0.549516	-0.00350438	-0.16066	-0.836544	-0.386381	-0.415405	-1.07368	-0.722325	-0.497085	-0.497844	-0.26266	-0.598572	-0.152487	-0.73204	-0.417958	0.273234	-0.0347417	-0.188684	0.356773	0.0719893	0.128733	0.149227	-0.305828	0.361566	-0.714001	-0.563434	-1.34116
15119	b0995	DNA-binding response regulator in two-component regulatory system with TorS (NCBI)	0.0364609	0.139036	0.199748	0.645637	0.133924	0.504545	0.127289	0.0400918	0.202927	0.208202	0.591935	0.160741	0.178739	0.7523	0.118378	-0.0632834	0.188365	0.205348	0.213477	0.233999	0.173725	0.161799	0.147737	0.724363	-0.0995523	0.114036	-0.34378	-0.601154	0.241831	0.247974	0.150333	0.144812	-0.0737435	-0.130466	0.0898622	-0.13171	1.13846	-0.678152	-0.59633	0.351659	-0.187895	-0.192738	-0.207353	0.402423	-0.269818	0.128336	1.48011
15120	b0996	trimethylamine N-oxide (TMAO) reductase I, cytochrome c-type subunit (NCBI)	-0.121473	-1.09925	-1.03398	-1.25845	-0.35078	-0.96254	-0.895607	-0.786674	-0.853758	-0.879838	-0.961905	-0.951714	-0.933424	-0.929234	-0.595131	-0.953408	-0.926433	-0.910587	-0.899102	-0.889463	-0.947892	-0.789899	-0.964922	-1.23447	-0.277956	-0.979861	-0.697027	-1.14546	-0.851185	-0.852705	-0.949489	-0.955366	-0.627827	-0.801458	-0.519876	-0.426632	-1.32394	-1.02712	-0.702328	-0.148397	-0.960758	-0.96216	-0.546215	-0.736075	-0.874616	-0.983396	-0.772981
15121	b0997	trimethylamine N-oxide (TMAO) reductase I, catalytic subunit (NCBI)	-0.0724623	0.160089	0.317478	0.263133	-0.216185	0.0725504	0.231167	0.304204	0.290959	0.295417	0.193562	0.251362	0.266043	0.265444	0.272974	0.164275	0.266744	0.284842	0.301819	0.323811	0.236053	0.556862	0.341813	0.118772	0.158201	0.161224	-0.00455173	0.068588	0.279877	0.283432	0.181019	0.186764	0.403128	0.485777	-0.0298375	0.405588	-0.248274	0.169472	-0.0607524	0.0326767	0.505928	0.387566	0.0304171	0.0728706	0.540739	0.249396	-0.197933
15122	b0998	chaperone protein TorD (NCBI)	0.244411	-0.556974	-0.48083	-0.628668	0.122742	-0.837908	-0.277468	-0.389277	-0.235912	-0.257495	-0.325831	-0.318031	-0.303124	-0.272075	-0.372539	-0.438946	-0.318321	-0.30117	-0.281525	-0.266951	-0.353076	-0.30231	-0.31308	1.43673	1.37451	-0.57909	-0.876915	0.353217	-0.492966	-0.49511	-0.588294	-0.572509	-0.743171	-0.806538	-1.03676	2.14662	3.42547	0.927425	0.583076	1.91234	-0.141464	-0.142431	-0.156559	-0.144149	0.909276	-0.50655	-2.26398
15123	b0999	modulator of CbpA co-chaperone (NCBI)	-0.161205	-1.08103	-0.997205	-1.23005	-2.25377	-1.56792	-0.970303	-1.12835	-0.939086	-0.962028	-1.03795	-1.02267	-1.00605	-1.02891	-1.11177	-1.28542	-1.01845	-0.99391	-0.974835	-0.962162	-1.07037	-1.03955	-1.04253	-1.30315	-1.40327	-0.616226	-1.07563	-0.103346	-0.51092	-0.513299	-0.619327	-0.604703	-0.813181	-0.932431	-0.619876	0.105383	-1.59314	0.339225	-0.398743	0.130746	-0.933803	-0.934266	-0.911754	-0.200553	-0.0316272	-0.948444	-0.917363
15124	b1000	curved DNA-binding protein, DnaJ homologue that functions as a co-chaperone of DnaK (NCBI)	-0.123909	-1.03587	-0.946922	-1.20226	-0.54102	-0.931234	-0.946973	-0.646976	-0.911293	-0.929725	-1.01024	-0.986618	-0.970047	-0.992824	-0.43635	-1.2494	-0.982013	-0.957289	-0.938747	-0.924331	-1.03287	-0.44605	-1.00647	-0.977685	-0.847789	-0.786015	-0.397637	0.321812	-0.690815	-0.691649	-0.557552	-0.77869	-0.46755	-1.10115	-0.0683735	0.15442	0.0532705	0.101412	-1.32818	0.568864	-0.868676	-0.483	-0.843048	-0.529661	-0.913524	-0.769086	0.369393
15126	b1002	glucose-1-phosphatase/inositol phosphatase (NCBI)	-0.00388988	0.117983	0.333778	-0.0559652	0.0117141	0.0725504	0.147689	0.184708	0.196793	0.201803	0.38907	0.297592	0.17747	0.316655	0.0742168	0.0415671	0.155369	0.182243	0.201587	0.226477	0.314836	0.152181	0.464113	0.047483	0.00392744	0.264861	-0.00648022	0.263552	0.370825	0.372017	0.34508	0.286735	0.188218	0.231985	0.272987	0.423781	0.248926	-0.0611074	-0.173875	0.164448	0.532007	0.311375	0.180276	0.460061	-0.00243769	0.389855	-0.630321
15128	b1004	TrpR binding protein WrbA (NCBI)	-0.00519656	-0.311504	-0.232369	-0.490642	-0.0344748	0.187914	0.00688325	-0.123634	0.0484017	0.395366	-0.0600415	0.0126874	0.0373742	-0.00843692	-0.0644353	-0.252749	0.559911	0.0369451	0.0505646	0.0860588	-0.0223741	0.168549	-0.0190574	-0.287565	-0.168431	0.220203	-0.258625	-0.515232	0.315985	0.315752	0.230324	0.249512	0.0481736	0.188743	-0.142234	-0.0198655	-0.67293	-0.00921199	0.194161	-0.453438	0.0531459	0.046881	0.075212	0.0708113	0.240348	0.132018	1.26409
15130	b1006	putative transport protein (VIMSS)	-0.151529	0.480244	0.559765	0.536464	-0.0365682	0.530437	0.506904	0.399428	0.560353	0.575824	0.451761	0.543736	0.568324	0.522769	0.466927	0.550099	0.547949	0.569139	0.581627	0.620786	0.511779	0.544691	0.512102	0.331691	0.715256	0.562764	0.651107	-0.109355	0.658417	0.658571	0.859084	0.81678	0.391063	0.251159	0.614189	0.503939	0.123127	0.510836	0.513649	-0.136328	0.916021	0.908701	0.925657	0.933854	0.500121	0.422647	-1.01759
15131	b1007	orf, hypothetical protein (VIMSS)	0.16533	-1.25008	-1.16619	-1.33964	-0.562019	-1.53438	-1.05491	-1.20382	-1.03435	-1.05736	-1.13537	-1.115	-1.09008	-1.11473	-1.16412	0.777249	-1.12718	-1.10734	-1.09098	-1.06311	-1.14315	-1.101	-1.12552	-1.32164	-1.36418	-1.43882	-1.75395	-1.94902	-1.36644	-1.3733	-1.45799	-1.42443	-1.58683	-1.66747	-1.89421	-1.5745	-1.44041	-1.34816	0.597371	-0.0319411	-1.04006	-1.04265	-0.998099	-1.00342	-1.28962	-1.19111	-2.90111
15132	b1008	hypothetical protein (NCBI)	0.100003	0.952937	0.85458	0.596234	0.116225	0.577747	0.695987	0.580617	0.745591	0.756922	1.00165	0.721297	0.74593	0.700371	0.644493	0.456708	0.725097	0.746114	0.759111	0.796605	0.687984	0.720773	0.689724	0.422672	0.751845	0.788389	0.848009	0.620241	0.88396	0.885339	0.799733	0.819008	0.617404	0.88518	0.983238	0.80879	1.199	0.166866	0.592051	0.608457	0.632403	0.62457	0.638474	0.649861	0.522096	0.236801	-1.06574
15133	b1009	predicted hydrolase (NCBI)	0.0843998	0.554257	0.29983	0.046031	0.634074	-0.0620003	-0.115622	0.24667	-0.0783463	-0.0753951	-0.189699	-0.16865	-0.0882922	-0.135528	-0.190372	-0.174335	-0.110825	-0.0942726	-0.0871874	-0.0633024	-0.16263	-0.124698	-0.144826	-0.421306	-0.505163	-0.0757564	-0.0934886	0.174451	0.00858115	0.00371744	0.129256	-0.0523125	0.11016	-0.393386	-0.533231	0.265066	0.14192	-0.0362217	-0.975608	0.355029	-0.151735	0.0343951	-0.110651	-0.141061	-0.0841899	-0.0176269	-0.49321
15134	b1010	hypothetical protein (NCBI)	0.106538	0.769379	0.173333	0.218837	-0.22009	-0.311153	-0.114533	-0.26264	-0.0778332	-0.0757973	-0.187005	-0.158543	-0.0796715	-0.136197	-0.191896	-0.378977	-0.104801	-0.0856155	-0.08397	-0.0620562	0.165838	-0.128391	-0.136158	0.00230961	-0.0670893	0.456084	-0.307797	-0.202915	0.0909282	0.0889811	0.033773	0.0541913	-0.144717	-0.179877	-0.684603	1.49756	-0.305684	-0.0219108	0.95447	-0.0903699	-0.329675	-0.32519	0.213026	-0.152636	-0.752458	-0.0441315	1.87698
15135	b1011	putative synthetase (VIMSS)	-0.164729	-0.946745	-2.59341	-2.83454	-0.839778	-0.967125	-2.55066	-2.75772	-2.54792	-2.56984	-2.65456	-2.67607	-2.60116	-2.65978	-2.72676	-2.89634	-2.62805	-2.60472	-2.60191	-2.58912	-2.68211	-2.67409	-2.6536	-1.84832	-3.01554	-2.69874	-2.04705	-2.28662	-2.6011	-2.61649	-2.66185	-0.576116	-2.84147	-2.08651	-3.37458	0.103614	-1.21643	-2.79194	-0.171814	0.147734	-1.43984	-1.38611	-2.27194	-2.3724	-2.77726	-2.42135	-0.127133
15136	b1012	orf, hypothetical protein (VIMSS)	-0.141754	-1.11775	-1.0312	-1.07164	-0.6252	-1.40187	-0.741933	-0.0260484	-0.0627283	-0.720358	-0.827014	-0.809349	-0.730404	-0.787126	-0.861461	-0.0303479	-0.75618	-0.737282	-0.734784	-0.71563	-0.810112	-0.781806	-0.787051	-1.07474	-1.14705	-1.0509	-1.51491	-1.54727	-0.967577	-0.971745	-1.02671	-1.00648	-1.04719	-1.35151	-0.811266	-0.46458	-1.75319	-1.20334	-1.26228	0.153998	-0.674386	-0.919448	-1.06804	-0.835598	-0.915183	-1.05746	0.420688
15137	b1013	predicted DNA-binding transcriptional regulator (NCBI)	0.239789	0.979294	1.04218	0.778274	0.28417	0.944184	0.500718	0.374551	0.553379	0.570465	1.5269	0.488094	0.568322	0.521327	0.454805	0.989982	0.546984	0.56404	0.569637	0.598339	0.498154	0.536519	0.511969	0.226059	0.153425	1.83161	0.578563	0.316448	1.13048	1.12478	1.07835	1.08201	0.905016	0.751716	0.824618	1.70144	0.0512049	0.346151	0.193349	0.863505	0.761718	0.782958	0.826408	1.0172	0.638892	1.08179	-0.0831074
15138	b1014	fused DNA-binding transcriptional regulator/proline dehydrogenase/pyrroline-5-carboxylate dehydrogenase (NCBI)	-0.0725958	-0.0329079	-0.0200562	-0.0824056	0.409268	-0.127202	0.110635	0.0520497	0.0851811	0.0955269	0.584779	0.0714913	0.0873858	0.120748	0.0573134	0.00839208	0.0628693	0.0823017	0.0901695	0.117129	0.101235	0.111515	0.0879387	-0.0805109	-0.166581	-0.0338696	0.199902	-0.261059	-0.0518089	-0.0594577	-0.0973977	0.132906	-0.0758485	-0.0143347	0.66388	0.157386	-0.319634	-0.0908387	-0.397428	-0.21047	0.682483	-0.0115997	-0.00568093	0.0719668	-0.0844095	0.0991819	0.26279
15139	b1015	proline:sodium symporter (NCBI)	-0.0639839	0.314873	0.50552	0.313165	0.264264	0.182472	0.253017	0.5956	0.302132	0.314483	0.172288	0.280662	0.304979	0.257992	0.341633	0.136758	0.283645	0.305921	0.318589	0.357216	0.234887	0.273268	0.247034	0.622065	0.452985	0.433966	0.114692	0.240761	0.514696	0.507943	0.461629	0.465188	0.657156	0.486103	0.706554	0.772118	-0.0564651	0.527373	0.0570856	-0.173502	2.01744	0.444613	0.465415	0.469575	0.262794	0.32973	-0.371518
15141	b1018	hypothetical protein (NCBI)	-0.0152854	-0.569892	-0.489698	-0.088697	-0.380525	-0.296239	-0.152039	-0.606654	-0.415951	-0.416491	1.48772	-0.500837	-0.428133	-0.326596	-0.561068	-0.292758	-0.452803	-0.428519	-0.426207	-0.404886	-0.0351815	-0.492338	-0.286729	-0.623937	-0.36991	-0.420603	-0.634774	-0.380988	-0.334834	-0.342797	-0.380703	-0.391433	-0.260029	-0.496295	-0.229683	1.12929	0.190406	-0.515564	0.842573	0.23911	-0.0771392	-0.282382	-0.10275	1.77797	-0.226953	-0.430726	-1.34647
15142	b1019	hypothetical protein (NCBI)	-0.0536347	-0.616781	-0.759176	-0.458904	-1.43172	-0.247507	-0.745989	-0.662086	-0.723018	-0.733444	-0.87312	-0.825762	-0.773711	-0.600045	-0.641805	-1.08316	-0.778541	-0.754637	-0.751207	-0.733527	-0.829157	-0.213879	-0.0863181	-1.09427	-0.637366	-0.487137	-0.135669	0.19	-0.392913	-0.394486	-0.435772	-0.447078	-0.610426	-0.771303	-0.0926096	-0.0511405	-0.969117	-0.939136	-0.434174	-0.0972083	-0.609421	2.0347	-0.398442	-0.432063	0.214067	-0.375918	-0.182579
15143	b1020	conserved protein with nucleoside triphosphate hydrolase domain (NCBI)	-0.152297	-0.626127	-0.00476791	-0.245192	0.0349678	-0.153559	0.193829	-0.040834	-0.536548	-0.516568	-0.687236	-0.581288	-0.529592	-0.566614	0.184074	-0.839388	-0.531004	-0.505681	-0.0624322	-0.474892	-0.573255	-0.382302	-0.117578	-0.843621	-0.447036	-0.572332	0.206739	0.456043	-0.478272	-0.477335	-0.0748976	-0.530161	0.0603577	-0.856119	-0.19912	-0.14356	0.522985	0.444538	-0.398636	0.179517	0.818792	0.293493	-0.506206	-0.501725	-0.865241	-0.198589	0.542549
[truncated: 2,888 more rows]

## Sheet: planktonic assays2
locusId	sysName	desc	set28IT004 LB_plus_SM_buffer	set28IT005 LB_plus_SM_buffer with T7_phage 6.25 MOI	set28IT006 LB_plus_SM_buffer with T7_phage 0.625 MOI	set28IT007 LB_plus_SM_buffer	set28IT008 LB_plus_SM_buffer with P1_phage 218.75 MOI	set28IT009 LB_plus_SM_buffer with P1_phage 21.875 MOI	set28IT010 LB_plus_SM_buffer with P1_phage 2.1875 MOI	set28IT011 LB_plus_SM_buffer with P1_phage 0.21875 MOI	set28IT012 LB_plus_SM_buffer with P1_phage 0.021875 MOI
[truncated: 3,714 more rows]

[truncated: 3 more sheets: Solid plate assays, Keio_hits_fit5, Fig 2A data]
