# Supplementary material for: High-throughput mapping of the phage resistance landscape in E. coli
Source: PLoS Biol. 2020 Oct 13;18(10):e3000877. doi: 10.1371/journal.pbio.3000877 (PMC7553319; doi:10.1371/journal.pbio.3000877)
Supplement: S4 Table — CRISPRi, CRISPR interference. (XLSX) [file pbio.3000877.s012.xlsx]

## Sheet: Summary
S4 Table
This file contains CRISPRi K-12 data for diverse phages
Sheets in this file are arranged as below:
1. seq: sequence of sgRNA
2. logFC: log2 fold-change as calculated by edgeR (fold-change is calculated between endpoint of 2nd back-dilution expt and 2nd t0)
3. logCPM: log2 of read counts per million for sgRNA
4. PValue: p-value for logFC between phage/control condition relative to t0
5. FDR: false discovery rate for logFC enrichment
6. pos: left-end position on e. coli chromosome that sgRNA hits
7. strand: strand of e. coli chromosome that sgRNA targets
8. category: type of genomic feature the sgRNA targets (eg gene, promoter, TFBS)
9. gene_name_F2: common name of gene (if sgRNA targets a gene)
10. bnumber_F2: corresponding bnumber of gene
11. Class(1:essential 2:noessential 3:unknown): essentiality of gene based on PEC database (eg if sgRNA targets an essential gene, this value is 1. note: for non-genic feature targeting guides this is 0)
12. RawCounts_IT0XX: raw counts for replicate 1 of phage-MOI condition (Note: counts are a result of summation of the two hiseq lanes for this index)
13. RawCounts_IT0YY: raw counts for replicate 2 of phage-MOI condition (Note: counts are a result of summation of the two hiseq lanes for this index)
14. RawCounts_t0_IT0AA: raw counts for replicate 1 of back dilution t0 (Note: counts are a result of summation of the two hiseq lanes for this index)
15. RawCounts_t0_IT0BB: raw counts for replicate 2 of back dilution t0 (Note: counts are a result of summation of the two hiseq lanes for this index)
In this file, we have following sheets: No phage, Promoter-TF-gene, T2 Phage, T3 Phage, T4 Phage, T5 Phage, T6 Phage, N4 Phage, CEV1 Phage, CEV2 Phage, LZ4 phage, lambda c1857 phage, 186 phage, CRISPRi_gene scores, and data used for Fig 3
No phage	Control experiment with no phage
Promoter-TF-gene	Top scorings gRNA hits for promoters, transcription factor binding sites and genes
crispri_genescores	Top scorings gene hits sorted by score
Fig 3AB data	Data for heatmap shown in Fig 3AB main text
Fig 3C data	Data for heatmap shown in Fig 3C main text
new gene names	yrfF (igaA) pdeN(rtn); gmr (pdeR); yjcC (pdeC); dosP (pdeO); pdeL (yahA); pdeB (ylaB); pdeI (yliE); dgcJ (yeaJ); yhbJ(rapZ)

## Sheet: Promoter-TF_gene
phage	seq	category	pos	strand	name	logFC	logCPM	PValue	FDR
T2	acaatacatgattctgcggt	Promoter	3524422	-	yrfF (igaA)p	5.96042	10.4823	1.96e-25	3.23e-21
T2	gatcatagcaaaccctctga	Promoter	3524342	-	yrfF (igaA)p	5.82735	10.3809	2.03e-27	6.7e-23
T2	atgattctgcggttggctat	Promoter	3524415	-	yrfF (igaA)p	5.62915	9.87936	6.18e-18	4.64e-14
T2	gctgatattccgccttcaga	Promoter	3524327	+	yrfF (igaA)p	4.29723	11.5071	9.99e-19	1.1e-14
T2	cggttggctatcggcaagcg	Promoter	3524406	-	yrfF (igaA)p	4.1661	8.99529	4.99e-14	2.74e-10
T2	ccatcccgcaagtagtgagc	All_Genes	3524531	-	yrfF (igaA)	4.34521	11.9584	7.03e-18	4.64e-14
T2	agcagctaaaaaaatcacaa	All_Genes	3524501	-	yrfF (igaA)	3.03043	8.57268	5.53e-09	1.4e-05
T2	tccgcgaaggcgttggtcca	All_Genes	3524587	-	yrfF (igaA)	2.4555	11.1595	5.3e-06	0.00759553
T2	ccagggcagctgacgccgtc	All_Genes	3524570	-	yrfF (igaA)	2.07698	8.80068	0.0018577	0.938382
T2	cagaccagtggcgagagtat	Promoter	2459216	-	fadLp	3.70153	5.19701	1.73e-08	3.8e-05
T2	gtaacaggagcgcgaagtgt	TFBS	2459261	-	CRP binding site (fadL)	4.44943	4.09628	4.43e-09	1.22e-05
T2	actatgttacgtgctgtaac	TFBS	2459276	-	CRP binding site (fadL)	6.91507	5.30392	4.67e-10	1.54e-06
T2	gagagcagactttgtaaaca	All_Genes	2459344	-	fadL	3.74991	6.83824	1.71e-13	8.06e-10
T2	actttgtaaacagggttttc	All_Genes	2459336	-	fadL	3.4551	6.70999	3.01e-11	1.24e-07
phage	seq	category	pos	strand	name	logFC	logCPM	PValue	FDR
T3	gatcatagcaaaccctctga	Promoter	3524342	-	yrfF (igaA)p	10.4367	10.3809	5.39023e-58	8.89172e-54
T3	acaatacatgattctgcggt	Promoter	3524422	-	yrfF (igaA)p	10.4182	10.4823	4.86078e-52	4.00917e-48
T3	atgattctgcggttggctat	Promoter	3524415	-	yrfF (igaA)p	10.1308	9.87936	6.74276e-38	2.78071e-34
T3	gctgatattccgccttcaga	Promoter	3524327	+	yrfF (igaA)p	10.0307	11.5071	2.66577e-58	8.7949e-54
T3	cggttggctatcggcaagcg	Promoter	3524406	-	yrfF (igaA)p	9.98339	8.99529	1.15507e-45	6.35136e-42
T3	caataggttgaaataactcc	Promoter	3524299	+	nudEp	8.43728	8.47561	3.63282e-23	3.99513e-20
T3	tgctgatattccgccttcag	Promoter	3524326	+	yrfF (igaA)	7.99708	7.76776	3.42699e-32	9.42193e-29
T3	ccatcccgcaagtagtgagc	All_Genes	3524531	-	yrfF (igaA)	10.0205	11.9584	1.77802e-54	1.95535e-50
T3	agcagctaaaaaaatcacaa	All_Genes	3524501	-	yrfF (igaA)	9.88906	8.57268	7.71957e-48	5.09368e-44
T3	ccagggcagctgacgccgtc	All_Genes	3524570	-	yrfF (igaA)	9.27849	8.80068	2.27319e-25	2.8845e-22
T3	tccgcgaaggcgttggtcca	All_Genes	3524587	-	yrfF (igaA)	9.1479	11.1595	8.87303e-37	2.92739e-33
phage	seq	category	pos	strand	name	logFC	logCPM	PValue	FDR
T4	acaatacatgattctgcggt	Promoter	3524422	-	yrfF (igaA)p	8.41825	10.4823	2.5734e-40	1.69803e-36
T4	gatcatagcaaaccctctga	Promoter	3524342	-	yrfF (igaA)p	8.06101	10.3809	2.13684e-42	1.76247e-38
T4	atgattctgcggttggctat	Promoter	3524415	-	yrfF (igaA)p	7.97578	9.87936	1.61095e-28	3.12637e-25
T4	gctgatattccgccttcaga	Promoter	3524327	+	yrfF (igaA)p	6.41098	11.5071	5.82276e-33	1.92105e-29
T4	cggttggctatcggcaagcg	Promoter	3524406	-	yrfF (igaA)p	6.34101	8.99529	8.83451e-26	1.32486e-22
T4	ccatcccgcaagtagtgagc	All_Genes	3524531	-	yrfF (igaA)	6.61525	11.9584	3.08046e-32	9.23915e-29
T4	agcagctaaaaaaatcacaa	All_Genes	3524501	-	yrfF (igaA)	6.19265	8.57268	2.84514e-26	4.69334e-23
T4	ccagggcagctgacgccgtc	All_Genes	3524570	-	yrfF (igaA)	5.20135	8.80068	3.67212e-12	2.57767e-09
T4	tccgcgaaggcgttggtcca	All_Genes	3524587	-	yrfF (igaA)	5.13942	11.1595	2.27632e-17	1.92565e-14
T4	ttggattattctgcattttt	Promoter	2310866	-	ompCp2	7.80224	8.05147	4.44727e-19	3.96552e-16
T4	gacttgccgactgattaatg	TFBS	2310836	-	LRP binding site of ompcP	6.77443	6.2205	3.33809e-13	2.44734e-10
T4	gttggattattctgcatttt	Promoter	2310867	-	ompcp	6.68339	6.05395	5.86898e-29	1.29086e-25
T4	tgttgtcagagaaatagtgc	All_Genes	2310630	+	ompC	10.2223	12.4126	9.46282e-43	1.04066e-38
T4	cagcagagctgggaccagga	All_Genes	2310730	+	ompC	7.85268	10.0701	1.6442e-68	5.42453e-64
T4	cgcctgctaccagcagagct	All_Genes	2310720	+	ompC	7.72559	10.1125	2.59693e-30	6.11986e-27
T4	ctaccagcagagctgggacc	All_Genes	2310726	+	ompC	5.34565	7.25207	8.39349e-20	7.91194e-17
phage	seq	category	pos	strand	name	logFC	logCPM	PValue	FDR
T5	gatcatagcaaaccctctga	Promoter	3524342	-	nudE	5.11089	10.3809	6.70923e-23	7.37837e-19
T5	acaatacatgattctgcggt	Promoter	3524422	-	yrfF (igaA)	4.85639	10.4823	3.87795e-19	1.82773e-15
T5	gctgatattccgccttcaga	Promoter	3524327	+	yrfF (igaA)	4.80711	11.5071	3.99208e-22	3.29267e-18
T5	cggttggctatcggcaagcg	Promoter	3524406	-	yrfF (igaA)	4.76209	8.99529	2.08257e-17	7.63423e-14
T5	atgattctgcggttggctat	Promoter	3524415	-	yrfF (igaA)	4.60504	9.87936	1.52193e-13	4.18428e-10
T5	caataggttgaaataactcc	Promoter	3524299	+	nudE	4.00085	8.47561	9.59986e-09	1.75955e-05
T5	tgctgatattccgccttcag	Promoter	3524326	+	yrfF (igaA)	3.75048	7.76776	1.91074e-11	4.50279e-08
T5	ccatcccgcaagtagtgagc	All_Genes	3524531	-	yrfF (igaA)	4.76815	11.9584	1.64551e-20	9.04809e-17
T5	ccagggcagctgacgccgtc	All_Genes	3524570	-	yrfF (igaA)	4.73065	8.80068	9.45746e-11	2.08014e-07
T5	agcagctaaaaaaatcacaa	All_Genes	3524501	-	yrfF (igaA)	4.70072	8.57268	4.16391e-18	1.7172e-14
T5	tccgcgaaggcgttggtcca	All_Genes	3524587	-	yrfF (igaA)	4.38898	11.1595	5.97187e-14	1.79113e-10
T5	cccaaaagagaaattagaaa	Promoter	169721	-	fhuA	2.61601	3.66534	0.00130278	0.354906
T5	aacgctggcgggttcgcaag	Promoter	167391	-	fhuA	5.04354	5.45377	9.34259e-12	2.37101e-08
T5	attttacgcagtgagtgttt	All_Genes	167511	-	fhuA	4.7997	8.09926	1.12122e-20	7.39826e-17
T5	gtgttttggctgagcagttt	All_Genes	167497	-	fhuA	4.29569	7.05989	1.79612e-31	5.92578e-27
T5	gcagttttggaacgcgccat	All_Genes	167484	-	fhuA	4.16422	8.18735	3.01431e-15	9.94483e-12
T5	acggtgatagtgtcttcttt	All_Genes	167595	-	fhuA	4.0646	8.21372	2.17599e-28	3.58951e-24
phage	seq	category	pos	strand	name	logFC	logCPM	PValue	FDR
T6	acaatacatgattctgcggt	Promoter	3524422	-	yrfF (igaA)	8.63256	10.4823	1.00276e-41	1.65415e-37
T6	gatcatagcaaaccctctga	Promoter	3524342	-	nudE	8.14319	10.3809	3.87953e-43	1.27993e-38
T6	atgattctgcggttggctat	Promoter	3524415	-	yrfF (igaA)	8.00303	9.87936	1.08692e-28	5.9766e-25
T6	cggttggctatcggcaagcg	Promoter	3524406	-	yrfF (igaA)	6.80382	8.99529	1.84784e-28	8.70914e-25
T6	gctgatattccgccttcaga	Promoter	3524327	+	yrfF (igaA)	6.59696	11.5071	2.52424e-34	2.77599e-30
T6	caataggttgaaataactcc	Promoter	3524299	+	nudE	4.53429	8.47561	2.38476e-10	4.62812e-07
T6	agcagctaaaaaaatcacaa	All_Genes	3524501	-	yrfF (igaA)	6.94822	8.57268	6.04062e-31	3.98584e-27
T6	ccatcccgcaagtagtgagc	All_Genes	3524531	-	yrfF (igaA)	6.74917	11.9584	4.0437e-33	3.33524e-29
T6	tccgcgaaggcgttggtcca	All_Genes	3524587	-	yrfF (igaA)	5.10893	11.1595	3.02511e-17	9.98044e-14
T6	ccagggcagctgacgccgtc	All_Genes	3524570	-	yrfF (igaA)	3.41131	8.80068	9.24502e-07	0.000953162
phage	seq	category	pos	strand	name	logFC	logCPM	PValue	FDR
N4	ccgctggggaggggaaattt	Promoter	1869951	-	yeaJ (dgcJ)p	4.14764	3.52001	5.90673e-06	0.00165195
N4	gctggggaggggaaatttag	Promoter	1869949	-	yeaJ (dgcJ)p	3.15691	3.84566	3.95382e-05	0.00836183
N4	ggcactcattgctctgtcgc	All_Genes	1870156	-	yeaJ (dgcJ)	5.28752	6.55678	4.17931e-23	1.37884e-18
N4	tgtcagcacaatgacacttg	All_Genes	1870105	-	yeaJ (dgcJ)	4.76687	5.68279	3.10485e-20	5.12176e-16
N4	tggcgacaagttcaaaaata	All_Genes	1870136	-	yeaJ (dgcJ)	3.70022	5.78292	5.85111e-09	3.8608e-06
N4	gatcatagcaaaccctctga	Promoter	3524342	-	nudEp	3.79377	10.3809	5.82778e-14	1.4261e-10
N4	gctgatattccgccttcaga	Promoter	3524327	+	yrfF (igaA)p	3.70761	11.5071	8.87729e-15	2.66254e-11
N4	acaatacatgattctgcggt	Promoter	3524422	-	yrfF (igaA)	3.40519	10.4823	1.51486e-10	1.64361e-07
N4	attaaccgcgatatggcgac	Promoter	1948281	-	yrfF (igaA)	3.31283	3.11235	3.13321e-05	0.00693764
N4	cggttggctatcggcaagcg	Promoter	3524406	-	yrfF (igaA)	3.2754	8.99529	4.13089e-09	2.78135e-06
N4	tgctgatattccgccttcag	Promoter	3524326	+	yrfF (igaA)p	3.21848	7.76776	1.37715e-08	7.83362e-06
N4	atgattctgcggttggctat	Promoter	3524415	-	yrfF (igaA)p	3.14732	9.87936	2.88849e-07	0.000114816
N4	caataggttgaaataactcc	Promoter	3524299	+	nudEp	2.89438	8.47561	2.34438e-05	0.00546691
N4	ccatcccgcaagtagtgagc	All_Genes	3524531	-	yrfF (igaA)	3.90265	11.9584	3.92122e-15	1.29369e-11
N4	ccagggcagctgacgccgtc	All_Genes	3524570	-	yrfF (igaA)	3.6471	8.80068	2.70995e-07	0.000109033
N4	tccgcgaaggcgttggtcca	All_Genes	3524587	-	yrfF (igaA)	3.63636	11.1595	1.54437e-10	1.64361e-07
N4	ggtagtcttccagcgaaacc	All_Genes	2022727	+	dsrB	3.87559	4.72191	1.71619e-11	2.09706e-08
phage	seq	category	pos	strand	name	logFC	logCPM	PValue	FDR
CEV1	acaatacatgattctgcggt	Promoter	3524422	-	yrfF (igaA)	8.72192	10.4823	5.91604e-42	3.90364e-38
CEV1	atgattctgcggttggctat	Promoter	3524415	-	yrfF (igaA)p	8.40075	9.87936	2.4945e-30	3.91898e-27
CEV1	gatcatagcaaaccctctga	Promoter	3524342	-	yrfF (igaA)p	8.15386	10.3809	9.13643e-43	1.07771e-38
CEV1	cggttggctatcggcaagcg	Promoter	3524406	-	yrfF (igaA)p	7.26216	8.99529	7.88362e-31	1.36893e-27
CEV1	gctgatattccgccttcaga	Promoter	3524327	+	yrfF (igaA)p	6.84451	11.5071	6.50454e-36	2.14598e-32
CEV1	agcagctaaaaaaatcacaa	All_Genes	3524501	-	yrfF (igaA)	6.55218	8.57268	4.82953e-28	6.1283e-25
CEV1	ccatcccgcaagtagtgagc	All_Genes	3524531	-	yrfF (igaA)	6.52306	11.9584	1.44422e-31	2.97798e-28
CEV1	tccgcgaaggcgttggtcca	All_Genes	3524587	-	yrfF (igaA)	5.38274	11.1595	1.73704e-18	1.14617e-15
CEV1	ttatctttgtagcactttca	Promoter	986354	-	ompFp	8.1075	7.92947	2.45671e-30	3.91898e-27
CEV1	tagcgaaacgttagtttgaa	Promoter	986331	-	ompFp	12.7423	11.8138	1.33663e-13	5.87976e-11
CEV1	atgcccgtcttggttttaaa	Promoter	986002	-	ompFp	11.2033	11.6837	3.85689e-15	1.92798e-12
CEV1	ggtaacggtgaaaacagtta	Promoter	986045	-	ompFp	8.97494	7.06668	3.70062e-15	1.87832e-12
CEV1	actgttttcaccgttaccct	All_Genes	986047	+	ompF	13.1291	15.5437	3.78056e-17	2.30978e-14
CEV1	atattcccactgaccataac	All_Genes	985951	+	ompF	12.5814	15.361	1.39699e-17	8.69612e-15
CEV1	tttaaaaccaagacgggcat	All_Genes	986002	+	ompF	11.8542	11.6798	1.04249e-19	7.64305e-17
phage	seq	category	pos	strand	name	logFC	logCPM	PValue	FDR
CEV2	acaatacatgattctgcggt	Promoter	3524422	-	yrfF (igaA)p	6.36323	10.4823	6.26294e-28	5.07729e-24
CEV2	gatcatagcaaaccctctga	Promoter	3524342	-	yrfF (igaA)p	6.33836	10.3809	6.08015e-31	1.00298e-26
CEV2	atgattctgcggttggctat	Promoter	3524415	-	yrfF (igaA)p	6.09716	9.87936	4.66071e-20	1.39787e-16
CEV2	gctgatattccgccttcaga	Promoter	3524327	+	yrfF (igaA)p	5.83567	11.5071	4.45269e-29	4.89677e-25
CEV2	cggttggctatcggcaagcg	Promoter	3524406	-	yrfF (igaA)p	5.79731	8.99529	5.8055e-23	2.39419e-19
CEV2	caataggttgaaataactcc	Promoter	3524299	+	nudE	4.66064	8.47561	8.66845e-11	1.05922e-07
CEV2	tgctgatattccgccttcag	Promoter	3524326	+	yrfF (igaA)p	4.64268	7.76776	1.19279e-15	2.62351e-12
CEV2	ccatcccgcaagtagtgagc	All_Genes	3524531	-	yrfF (igaA)	5.93015	11.9584	7.69473e-28	5.07729e-24
CEV2	agcagctaaaaaaatcacaa	All_Genes	3524501	-	yrfF (igaA)	5.5199	8.57268	9.81194e-23	3.59684e-19
CEV2	ccagggcagctgacgccgtc	All_Genes	3524570	-	yrfF (igaA)	5.38967	8.80068	8.56148e-13	1.56922e-09
CEV2	tccgcgaaggcgttggtcca	All_Genes	3524587	-	yrfF (igaA)	5.27636	11.1595	4.75406e-18	1.20651e-14
CEV2	aacgctggcgggttcgcaag	Promoter	167391	-	fhuA	5.69762	5.45377	7.49308e-14	1.54507e-10
CEV2	attttacgcagtgagtgttt	All_Genes	167511	-	fhuA	5.54529	8.09926	2.44589e-25	1.15278e-21
CEV2	gtgttttggctgagcagttt	All_Genes	167497	-	fhuA	5.03656	7.05989	6.43121e-40	2.12179e-35
CEV2	gcagttttggaacgcgccat	All_Genes	167484	-	fhuA	4.24943	8.18735	1.05458e-15	2.48519e-12
CEV2	acggtgatagtgtcttcttt	All_Genes	167595	-	fhuA	3.86354	8.21372	2.93852e-26	1.61579e-22
phage	seq	category	pos	strand	name	logFC	logCPM	PValue	FDR
LZ4	ccatcccgcaagtagtgagc	All_Genes	3524531	-	yrfF (igaA)	4.49997	11.9584	1.39779e-18	8.85343e-15
LZ4	tccgcgaaggcgttggtcca	All_Genes	3524587	-	yrfF (igaA)	2.54967	11.1595	3.67323e-06	0.00577081
LZ4	atgattctgcggttggctat	Promoter	3524415	-	yrfF (igaA)	6.02359	9.87936	3.04195e-19	2.509e-15
LZ4	acaatacatgattctgcggt	Promoter	3524422	-	yrfF (igaA)	6.01173	10.4823	5.40072e-25	5.93935e-21
LZ4	gatcatagcaaaccctctga	Promoter	3524342	-	yrfF (igaA)	5.95609	10.3809	1.96268e-27	3.23763e-23
phage	seq	category	pos	strand	name	logFC	logCPM	PValue	FDR
lambda	tgggctgactatgcgtcatc	Promoter	4244740	-	malKp	6.42396	4.55409	2.02656e-09	1.42256e-06
lambda	ataaaaaagccagggggtgg	Promoter	4244701	+	malKp	5.27201	5.02783	1.85294e-11	1.69812e-08
lambda	tccaccccctggctttttta	Promoter	4244702	-	malT on MalE	5.16852	4.42861	9.49256e-08	5.59247e-05
lambda	ggggcaaggaggatggaaag	Promoter	4244516	-	malT on MalE	5.10718	6.48711	5.39695e-11	4.68569e-08
lambda	ccaccccctggcttttttat	Promoter	4244701	-	malT on MalE	5.01692	6.2342	9.43031e-19	3.11125e-15
lambda	gtaattaatggttataaggt	Promoter	3551035	-	mlc on MalT	4.82016	5.07123	9.27726e-13	1.17721e-09
lambda	gcttgcattagaaaggtttc	Promoter	3551009	+	malTp	4.62661	5.80491	3.02112e-15	4.98363e-12
lambda	ggtggggcgtaggggcaagg	Promoter	4244527	-	malEp	4.60554	6.05651	3.42873e-12	3.90071e-09
lambda	caccccctggcttttttatg	Promoter	4244700	-	malKp	4.50532	4.7428	4.70016e-09	3.16465e-06
lambda	cggttggctatcggcaagcg	Promoter	3524406	-	malKp	4.28812	8.99529	5.68101e-15	8.92514e-12
lambda	ggcttaaatcctccaccccc	Promoter	4244713	-	malKp	4.24042	6.26009	2.00715e-09	1.42256e-06
lambda	gaggcgggaggatgagaaca	TFBS	4244674	-	malT on MalE	5.60684	5.02854	7.26707e-15	1.0898e-11
lambda	tgtgatctctgttacagaat	TFBS	4244556	+	crp on	3.9999	4.0552	1.82366e-10	1.43252e-07
lambda	aaagcgacggtggggcgtag	TFBS	4244535	-	malT on MalE	3.88814	4.43243	2.98964e-10	2.29382e-07
lambda	acagagatcacacaaagcga	TFBS	4244548	-	malT on MalE	3.82855	4.76069	1.02495e-06	0.000545408
lambda	cttttttatgggggaggagg	TFBS	4244690	-	malT on MalE	3.81105	3.16282	0.000148548	0.0550662
lambda	cctcccccataaaaaagcca	TFBS	4244693	+	malT on MalE	3.71352	4.02045	5.90361e-09	3.89544e-06
lambda	aactaaaccgaggtcatgta	TFBS	4244643	-	CRP on 'malEp', 'malKp	3.62738	5.4147	2.92887e-14	4.02622e-11
lambda	agatcacacaaagcgacggt	TFBS	4244544	-	CRP on 'malEp', 'malKp	3.2394	4.63613	3.38037e-06	0.00157078
lambda	agacattacgcccgctgcga	All_Genes	4246034	-	lamB	6.2226	8.39428	1.65514e-27	1.36516e-23
lambda	gctacctgtccaaccaatac	All_Genes	4246097	-	lamB	5.53481	8.64339	4.8506e-29	8.00155e-25
lambda	taccggaacgtgcatagccg	All_Genes	4246080	-	lamB	4.5762	8.23035	6.58601e-16	1.14361e-12
lambda	gctgcgacggcaaccgccag	All_Genes	4246021	-	lamB	2.96496	6.65701	6.02891e-07	0.000342941
lambda	cgataccacgacctcgcccc	All_Genes	4244844	-	malK	5.41225	8.76829	4.3308e-22	2.04117e-18
lambda	gctggtgatcgtctcaagcc	All_Genes	4244958	-	malK	4.34712	7.38068	4.46097e-20	1.63529e-16
lambda	acaccacgaattcaccttca	All_Genes	4244887	-	malK	2.44807	7.45189	9.66105e-07	0.000522521
lambda	accggacgacttagttttga	All_Genes	3551119	-	malT	5.68628	7.27035	4.27719e-12	4.70377e-09
lambda	cgccggaaagtttagccagc	All_Genes	3551172	-	malT	5.15827	8.02086	6.92542e-32	2.28483e-27
lambda	acggtatggtcgagtcgaac	All_Genes	3551137	-	malT	4.87992	8.13596	1.32208e-22	7.26966e-19
lambda	cagccggaagttgttcgcgc	All_Genes	3551189	-	malT	4.3817	7.08202	1.30388e-14	1.87033e-11
lambda	gatcatagcaaaccctctga	Promoter	3524342	-	nudEp9	4.38708	10.3809	2.19991e-18	6.59813e-15
lambda	acaatacatgattctgcggt	Promoter	3524422	-	yrfF (igaA)	4.31947	10.4823	3.67134e-16	8.07499e-13
lambda	atgattctgcggttggctat	Promoter	3524415	-	yrfF (igaA)p	3.8732	9.87936	1.35841e-10	1.09309e-07
lambda	gctgatattccgccttcaga	Promoter	3524327	+	yrfF (igaA)p	3.84028	11.5071	6.55347e-16	1.14361e-12
phage	seq	category	pos	strand	name	logFC	logCPM	PValue	FDR
186	taagtgcgttatcagtattc	Promoter	3806236	-	waaP	3.47414	6.99329	8.01991e-07	0.00036749
186	ttcaggtagctgttgagcct	Promoter	3806219	-	waaAp2	2.74722	3.3954	4.75061e-06	0.0015518
186	atccttgcacctctatgtaa	Promoter	3791902	+	rfaDp1	2.73238	5.63721	2.55375e-09	2.95987e-06
186	tcaggtagctgttgagcctg	Promoter	3806218	-	waaQp	2.67472	3.69204	2.63759e-06	0.000935692
186	tacaaataacgatatctggt	All_Genes	3801890	+	waaB	2.4997	5.68994	4.21028e-06	0.00140309
186	aatccctgggattgcctgct	All_Genes	3794075	-	waaC	2.52317	8.23053	1.34614e-06	0.000576778
186	tgctgggcatcagtgagtgc	All_Genes	3794059	-	waaC	2.52156	8.71849	7.09016e-07	0.000339012
186	tcatgtcgccaacccaagac	All_Genes	3792975	-	waaF	2.58484	7.46038	2.00542e-06	0.000752376
186	ccgaacatggtggccccgtg	All_Genes	3804986	+	waaG	2.99337	7.02795	1.7257e-10	2.84671e-07
186	tcacgttgaagcccaccaaa	All_Genes	3805035	+	waaG	2.95252	6.93107	4.917e-07	0.000263257
186	gaataagctcaaatgctttc	All_Genes	3804934	+	waaG	2.7879	6.73903	6.08148e-05	0.0124621
186	tgagtccaattcttagtgct	All_Genes	3800759	+	waaI	2.82015	5.34084	0.000144258	0.0247353
186	ggttttatactgcaacgcca	All_Genes	3800827	+	waaI	2.50365	6.06913	1.02019e-06	0.000454838
186	attagctagccgaaaatccc	All_Genes	3799960	+	waaJ	3.02275	6.40659	1.3717e-06	0.000580195
186	gattaatatgtcgattattt	All_Genes	3799851	+	waaJ	2.68378	3.98128	0.000266606	0.0394434
186	ccacgccaaagtgtggcaag	All_Genes	3803933	+	waaP	3.53658	7.37419	1.33623e-13	8.81698e-10
186	tctctgtctgcgcccaaaac	All_Genes	3803744	+	waaP	2.88923	7.21491	5.92222e-05	0.0122884
186	ctctctgtctgcgcccaaaa	All_Genes	3803743	+	waaP	2.72916	5.92469	5.59387e-06	0.00176897
186	tttaagaaaatagcttttcc	All_Genes	3803824	+	waaP	2.44139	5.8584	3.57796e-06	0.00121695
186	gatccgtaagattaatgacc	All_Genes	3805869	+	waaQ	2.88509	6.20082	1.45824e-07	9.43339e-05
186	tgcgatattttcatccgtgc	All_Genes	3805814	+	waaQ	2.88345	6.19557	6.55806e-07	0.000318181
186	agcatatcgatttttgcatc	All_Genes	3806036	+	waaQ	2.64942	6.22382	7.89488e-08	5.78818e-05
186	gttttcagacaaaataggga	All_Genes	3805999	+	waaQ	2.63454	6.19462	7.18898e-05	0.0142023
186	caaggaaaaaacatattggc	All_Genes	3802656	+	waaS	2.72192	4.70402	2.64352e-05	0.00627445
186	cgaccaaggaaaaaacatat	All_Genes	3802652	+	waaS	2.56749	6.47021	1.78654e-09	2.26698e-06

## Sheet: crispri_genescores
gene_name_F2	logFC T2		gene_name_F2	logFC T3		gene_name_F2	logFC T4		gene_name_F2	logFC T5		gene_name_F2	logFC T6		gene_name_F2	logFC N4		gene_name_F2	logFC Lmbda		gene_name_F2	logFC 186		gene_name_F2	logFC CEV1		gene_name_F2	logFC CEV2		gene_name_F2	logFC LZ4
yrfF(igaA)	2.74296		yrfF(igaA)	9.58378		ompC	7.78913		yrfF(igaA)	4.71568		yrfF(igaA)	5.92905		ydfW	4.34276		lamB	5.0555		serX	3.08853		ompF	12.2178		yrfF(igaA)	5.45478		ompF	5.5724
fadL	2.508		yedY	9.45711		yrfF(igaA)	5.697		fhuA	4.22996		tsx	3.1722		yeaJ(dgcJ)	4.23354		malT	5.01909		waaG	2.87021		yejL	6.40941		fhuA	4.643		tsx	4.69219
yejL	2.31887		yejL	6.27322		tag	4.87358		ileY	2.47075		yejL	2.71245		yecT	3.94411		secE	3.72815		waaP	2.8092		sokB	6.26707		ileY	4.1623		mdtN	4.45847
ynbC	2.19956		yejM	6.01281		yejL	4.73022		argV	2.40936		yejM	2.65408		dsrB	3.87559		yidC	3.67116		serT	2.78319		mdtN	6.11467		asnW	3.55328		yrfF(igaA)	3.52482
aspS	1.9828		yfjH	5.65062		yejM	4.08333		serV	2.35566		csrA	2.51913		asnS	3.72189		nusB	3.6345		ileY	2.78068		yrfF(igaA)	5.9529		ileX	3.42758		yejL	2.46001
valS	1.89161		yfjU	5.55554		wbbL_1	3.54584		argU	2.21347		wbbL_1	2.18779		nfrB	3.66778		nusG	3.54936		waaQ	2.76644		lptC	5.66357		secE	2.96042		rsmE	2.30745
rplX	1.58038		fabB	4.94054		yibA	3.47113		ileX	2.17809		yedY/MSRPS	2.01443		yrfF(igaA)	3.6471		ribE	3.47059		tsf	2.75926		yejM	5.5027		yejM	2.84405		lptC	1.99571
pheM	1.56805		yzgL	4.88919		yfcI	3.23951		tyrU	2.0601		rrsG	1.89848		nfrA	3.50619		yrfF(igaA)	3.45739		rnpB	2.61489		lptA	5.34627		yejL	2.73163		yejM	1.96954
trmD	1.51614		ispU	4.88515		efeU_2	3.22265		asnW	2.021		rluC	1.84279		ftsH	3.23962		malK	3.39759		waaS	2.56749		kdsC	5.3204		nusG	2.53182		yedY	1.96891
gltX	1.51309		bluR	4.83063		yejO	3.16371		glyW	1.91079		lptA	1.79371		rhoL	3.23526		glnS	2.93244		ileX	2.53186		lpxC	4.49828		lptC	2.52978		lptA	1.44737
rpsJ	1.49755		lptC	4.72772		hybC	3.05293		thrU	1.87755		lptC	1.78769		ybcF	3.18634		argU	2.36619		secE	2.52754		lptB	3.93505		gyrB	2.40631		sgbU	1.39876
dusA	1.46822		fabA	4.61112		lptC	3.02797		glnU	1.69901		rsmH	1.74802		glmU	3.17671		ileY	2.35282		waaI	2.50365		hdeB	3.58988		kdsC	2.39451		yafQ	1.36665
rpsH	1.44495		cdsA	4.60316		yedY	2.93466		leuZ	1.57219		rpsM	1.6905		gltX	3.12133		leuS	2.34788		rfaD	2.4938		cueR	3.4256		ftsA	2.28145		bamD	1.24975
rplE	1.43281		hokE	3.77932		ybdN	2.80254		bamA	1.54277		spy3'	1.63641		thrS	3.10493		csrA	2.30964		leuZ	2.41165		yhfL	3.35356		lptA	2.23242		csgF	1.20453
leuS	1.37146		yjdO	3.7681		ycjM	2.7353		prfB	1.54134		ygfK	1.4713		yedP	2.95061		tufB	2.0571		rhsE	2.30063		yeeN	3.34113		ftsZ	2.13367		yhhM	1.15601
pheS	1.3623		rplL	3.73103		insJ	2.54596		cysT	1.5197		trmL	1.4364		glmS	2.94008		proS	1.58952		phoU	2.20653		rpsN	3.28732		glyW	2.0534		rcnR	1.07041
rplC	1.36067		secE	3.72833		degQ	2.38878		tyrV	1.49363		yfjU	1.43567		pheS	2.86366		ftsH	1.55376		waaJ	2.19035		yjgZ	3.22707		ybfH	2.01252		hyaD	1.02043
secY	1.33756		astC	3.6828		argW	2.22383		valV	1.44823		argW	1.38691		pheT	2.78736		cysS	1.36077		waaB	2.11569		nemR	3.21827		lpxC	1.98623		yodB	1.02019
rplD	1.32238		ftsI	3.66907		eyeA	2.19379		gltW	1.40867		racR	1.37266		pdxJ	2.7829		asnS	1.3416		nusG	2.09913		yadK	3.19926		lptB	1.96496		yebK	0.995429
pheT	1.30963		murF	3.66515		tyrU	2.16022		hupB	1.40475		infC	1.27668		tyrS	2.76491		lptC	1.2273		waaC	2.02631		nmpC	3.19804		acpP	1.95553		syd	0.992881
rpsN	1.29925		cas3	3.5908		lptA	2.09397		pheU	1.39226		insB-7_2	1.27381		tufB	2.75407		thrS	1.22542		rcbA	2.02507		ynaE	3.0519		fabD	1.90639		yjiL	0.986214
yedY	1.27564		rpsF	3.55818		kdsC	2.06495		glyT	1.38022		murA	1.22727		yhaL	2.6958		yejM	1.22484		ogrK	2.02121		uidA	2.78786		fabH	1.86346		waaS	0.956966
alaS	1.27155		hypE	3.55684		lpxC	2.01636		rbfA	1.30052		kdsC	1.21997		yedY	2.69275		yejL	1.12856		thrU	2.00623		ldcC	2.74893		ymiA	1.82327		yjhR	0.950218
rpoA	1.26554		mraZ	3.5535		lysT	2.01601		trpT	1.2804		fabB	1.21665		tufA	2.67429		alaS	1.0467		rhoL	2.0049		ydaM	2.69033		fabI	1.80925		yiaJ	0.943657
yejM	1.25406		lptA	3.54579		yjgW	1.98661		dusB	1.24665		argX	1.20726		yphD	2.65335		ileX	1.01073		prfA	1.99992		lptF	2.59542		bamA	1.72201		comR	0.940149
rplN	1.23233		mraY	3.52293		yigF	1.96979		pheM	1.21859		rpoA	1.20643		valS	2.561		tyrS	0.959833		prfB	1.95474		yhhX	2.58321		lpxB	1.71512		ypdC	0.929765
lptC	1.20869		lpxC	3.51594		ysaB	1.93739		ymfI	1.19465		ykfJ	1.20559		torY	2.55506		ispU	0.957293		proM	1.93519		lpxA	2.5034		yedN_1	1.68559		rnpA	0.917131
rplO	1.16218		rplJ	3.4836		tdk	1.91867		nohB	1.16121		pheM	1.20181		glnS	2.54223		lptA	0.917163		tufB	1.89833		rfaD	2.47093		ddlB	1.66439		yacG	0.912983
rplF	1.12639		cysT	3.47312		dosP	1.91536		fis	1.15006		ydfW	1.18944		ileS	2.52936		pheS	0.914275		nusA	1.86146		argW	2.39663		rplL	1.66168		groS	0.906149
yfaD	1.10663		rpoE	3.40119		higB	1.90954		tsf	1.13663		dnaC	1.17623		leuZ	2.49032		tsf	0.898669		yagF	1.82674		yafN	2.37911		thrU	1.64312		yjjU	0.886423
infB	1.10597		ybeQ	3.39251		ylcG	1.8937		yejM	1.12217		ymiA	1.16845		trpS	2.43243		glyQ	0.882687		atpB	1.66827		yidH	2.27062		lpxA	1.61324		dcuR	0.881756
rplP	1.09889		rplQ	3.37021		alaC	1.87507		yjhC	1.1215		ynbC	1.16176		aspS	2.43045		kdsC	0.874451		atpC	1.64998		bamA	2.26675		cysT	1.61296		pka	0.877129
rpsC	1.08775		murA	3.34673		casA	1.86777		ftsQ	1.08134		cdsA	1.14874		alaS	2.39557		leuU	0.849226		atpE	1.62932		dnaG	2.24155		ftsQ	1.60394		cusS	0.876224
rarA	1.08729		ftsL	3.33263		yjhE	1.86414		insD-6	1.07832		rplC	1.14829		hflD	2.34181		lpxK	0.812625		pheU	1.61229		yaiL	2.22657		tyrU	1.59401		tff	0.875885
gltW	1.07913		glnS	3.29137		b1364	1.83912		yaaY	1.03706		yegJ	1.14777		glmM	2.31961		cdsA	0.805675		yfdR	1.5964		ydaW	2.19784		rzpR	1.54631		cdsA	0.868381
lptA	1.07629		murG	3.26847		ygaQ_2	1.82347		cysS	1.03277		yfjW	1.14624		glyQ	2.31145		pheT	0.79944		prmC	1.58589		yadL	2.09334		hlpA	1.48049		yihW	0.868281
glyQ	1.06429		murC	3.25216		aldB	1.80219		glnV	1.03041		yneM	1.1411		cysS	2.31032		glyS	0.738171		trpT	1.57783		rcdA	2.08612		ispU	1.47579		iadA	0.835421
ypdK	1.05528		murE	3.22261		rsmH	1.77835		bamD	1.02975		sibA	1.12668		tsf	2.17068		spoT	0.722095		maa	1.57756		yahJ	2.07866		ftsX	1.46939		glyA	0.830566
kdsC	0.996378		rplC	3.19904		yliI	1.76589		lpxC	1.01123		yeeL_1	1.12443		lysS	2.16519		rpoZ	0.69986		narQ	1.5667		lpxB	2.05626		minE	1.46819		yqgD	0.824168
tyrU	0.994252		kdsC	3.17777		ybeF	1.74414		yejL	1.00706		iraM	1.1042		yqjH	2.12665		ppiB	0.686065		gltX	1.55853		ymiA	2.00071		racR	1.44839		nac	0.821585
tff	0.989367		argV	3.17238		ilvG_2	1.73931		rnc	1.0022		metY	1.0827		sroE	2.10447		tufA	0.653817		ycgZ	1.55826		csrA	1.96835		ybiS	1.41988		arnA	0.817726
rimP	0.930947		pheU	3.13423		b0165	1.73899		glnS	0.996924		yffP	1.08005		purA	2.09547		ymfI	0.630444		dnaJ	1.55693		hlpA	1.9433		intE	1.41236		chbR	0.812549
glyS	0.929754		bcsQ	3.12264		ftsL	1.71195		hemA	0.994313		rplP	1.07231		glyS	2.07568		aspS	0.61527		atpA	1.55172		yraH	1.90278		gluQ	1.39141		tar	0.798542
glyA	0.920218		ndk	3.12154		ves	1.70524		argX	0.986523		ydhL	1.06775		ihfA	2.05851		msbA	0.607541		hybC	1.55092		insA-7	1.8565		yddH	1.38072		prpB	0.797026
metY	0.920075		lspA	3.06295		ykgL	1.70516		pheS	0.96754		ytfG	1.04521		hpt	2.00405		pstB	0.583397		yfjU	1.53642		yicL	1.85132		lptF	1.36269		yjhB	0.788957
rpsB	0.912509		yjcC	3.05419		rsgA	1.70039		hisS	0.966887		yjjQ	1.0388		ygeW	2.00373		gltX	0.580565		rfaE	1.53463		insH-5	1.83318		yfjH	1.33076		pgm	0.787504
tyrS	0.907003		yafO	3.0377		ymdE	1.68755		tufB	0.95918		ybeU	1.03625		argS	1.99319		sroE	0.567641		glyW	1.5278		yebO	1.82777		ydfN	1.33003		nadE	0.786655
ydaE	0.905321		hyaD	2.99209		murA	1.68142		secE	0.927271		ispU	1.03217		metG	1.98882		pheM	0.563402		psd	1.52027		yneG	1.82087		trpT	1.32064		yghD	0.784971
rimM	0.903925		tufA	2.98106		rbbA	1.6678		era	0.916647		trmD	1.02988		ygdD	1.98701		rpoH	0.505305		rep	1.48389		yfjX	1.80301		ybfB	1.31881		yehK	0.784008
asnS	0.89955		ftsQ	2.97765		yadN	1.64696		hycE	0.910537		rpmD	1.02017		proS	1.97546		trpS	0.492897		yicG	1.48321		yebZ	1.78405		argU	1.31181		yeaQ	0.776195
rpsK	0.891137		tyrS	2.93876		ppiC	1.64503		ispU	0.90912		glyT	1.01605		bglX	1.92044		rpmE	0.492023		mdtO	1.42203		pheM	1.77976		fabZ	1.30379		hofC	0.770389
ymfI	0.891022		lptB	2.91965		yagK	1.63459		hlpA	0.901996		yegP	1.00534		arcA	1.88698		mnmC	0.491863		leuU	1.41788		yegD	1.77632		yghX_1	1.29917		yihU	0.765129
pheU	0.889973		asnW	2.8707		yjbM	1.63031		sibD	0.897791		yeiS	1.00251		yejA	1.8848		treC	0.473153		ecpC	1.41351		ydeJ	1.77492		insI-3	1.29891		ybjQ	0.76061
ileS	0.885051		yghB	2.86186		yedS_3	1.61915		lysS	0.892713		yodC	0.998457		cydB	1.86646		ppa	0.464042		pstB	1.40849		yegZ	1.76454		msbA	1.29819		ybjC	0.753271
thrS	0.8811		ftsA	2.84351		hisP	1.60693		ftsA	0.889416		aspS	0.998257		yggC	1.85724		lptB	0.448111		ymfJ	1.39986		mnmC	1.75958		ykfJ	1.2973		nemR	0.751122
rplR	0.874047		rpsG	2.83799		isrC	1.59179		ppiB	0.876957		ypdK	0.99593		hisS	1.8468		valS	0.44565		yabQ	1.39752		bcsB	1.7553		rnc	1.2728		hipA	0.747677
rpmE	0.856819		hycE	2.82423		ybcY	1.57508		rnt	0.869869		pspD	0.989841		fabD	1.84		argV	0.444156		tyrU	1.39698		cdsA	1.72989		murD	1.26222		iap	0.744229
yedN_1	0.842027		tsf	2.82205		yagA	1.56584		rzpQ	0.869422		yhbX	0.988009		clsC	1.81727		phoU	0.442959		atpD	1.38984		yjbI	1.72687		dedD	1.24897		ghrB	0.74409
cspB	0.83138		alaS	2.8203		eco	1.55638		hisR	0.867105		yibA	0.984076		fabI	1.79449		serS	0.435566		hisR	1.38631		waaC	1.72614		glnV	1.24753		yhcB	0.739916
rpsE	0.827997		glcE	2.81431		kdpF	1.5258		yfaD	0.863882		recT	0.98043		lpd	1.78778		recG	0.43504		frsA	1.38627		ydfB	1.6744		yeeL_1	1.23479		yhgN	0.739728
tufB	0.826279		ftsZ	2.79886		nei	1.52532		trpS	0.861669		ydcL	0.97873		iscS	1.77763		secG	0.42807		rzpD	1.38368		lsrK	1.66571		cdsA	1.23315		argH	0.735281
ybaP	0.812411		rsmH	2.76796		ftsI	1.52222		lptC	0.858341		ygaU	0.97635		ptsH	1.76782		hisS	0.422456		apt	1.382		yeeW	1.66214		icdC	1.22131		acrE	0.728924
tsf	0.809675		yfbP	2.74875		rpsT	1.50888		tufA	0.848545		ydfN	0.96759		groS	1.76413		tfaD	0.414993		atpF	1.37611		mreB	1.63846		fabG	1.21637		isrB	0.723592
serS	0.808974		gltX	2.74601		recT	1.50862		pheT	0.848421		yagA	0.953408		yicH	1.74716		dnaK	0.408155		yahH	1.36824		viaA	1.63229		yggP	1.21369		dapF	0.72225
tyrV	0.805497		sufB	2.73207		tsf	1.49401		ihfB	0.840866		dacD	0.952798		hfq	1.72808		pfkA	0.405455		sspA	1.35281		dcp	1.6277		zipA	1.20957		ybhF	0.705863
adrA	0.803129		rplK	2.73092		yfcU	1.49149		ogrK	0.835219		ydjI	0.95227		yijO	1.71938		ispE	0.402243		waaF	1.35247		yjhV	1.61658		ygaQ_2	1.20645		ydiR	0.701413
rplW	0.794895		nudE	2.71434		ydbA_1	1.49081		yedM	0.833254		hflX	0.946744		asnW	1.71641		yedM	0.401725		rrsG	1.34638		ydjO	1.60342		plsB	1.20536		ybdK	0.700107
thrU	0.78559		tufB	2.69721		ymgH	1.48999		sroE	0.832017		yfjM	0.941508		adk	1.68985		ydaU	0.395372		ftsB	1.34292		agaV	1.60137		lpxD	1.19134		yaiY	0.699865
rpsA	0.757747		rpsI	2.68085		psuK	1.48634		fliZ	0.827759		ftsL	0.934493		yidC	1.66793		ilvG_2	0.393988		yfjY	1.34025		fabZ	1.60126		rplJ	1.17161		uxuA	0.698937
rplQ	0.755146		ybiI	2.67012		ldrA	1.46833		ftsH	0.826702		rsxC	0.930873		yehM	1.6445		metG	0.390304		asnS	1.33015		puuC	1.57976		rsmB	1.16268		asnB	0.695236
ispU	0.751603		sroE	2.65833		yibT	1.46529		thrW	0.824792		alaS	0.925928		ydeU	1.63641		proK	0.387117		atpG	1.32866		yfbM	1.56848		hupA	1.14748		yggI	0.694598
rplS	0.75103		ybbC	2.65619		acrZ	1.46141		bamB	0.820484		pqiB	0.925453		iscU	1.63389		malM	0.385422		hemA	1.32691		aspC	1.56075		tyrV	1.14072		leuA	0.688064
rpsI	0.746358		ydeU	2.63524		yieP	1.44507		yfbP	0.816932		yedZ	0.92438		serS	1.62342		mfd	0.383833		argX	1.30467		ythA	1.558		yjtD	1.14039		malT	0.686128
rrlG	0.745116		ybeU	2.62084		yjdJ	1.44079		ydfR	0.81644		ymfK	0.921139		fkpB	1.61094		ybcV	0.383756		pstS	1.29187		yafS	1.5488		yoaD	1.13849		lamB	0.68024
rplM	0.742885		yqaA	2.61158		ylaC	1.43802		secG	0.814519		yncH	0.910522		fdx	1.60674		yghA	0.37897		thrS	1.28428		yedN_2	1.54765		gyrA	1.13481		yjcD	0.678795
ydfB	0.741453		caiE	2.60809		yqjE	1.43529		tyrS	0.806618		rpsB	0.907942		yjjP	1.59661		ihfB	0.377564		rpoZ	1.27994		rfaE	1.54601		eaeH	1.11585		yhcH	0.676362
hemA	0.740803		ybbW	2.59919		rluF	1.4329		yadL	0.800445		def	0.90407		ydcZ	1.59449		sibE	0.372307		hisS	1.27361		ybhC	1.54502		yqgC	1.09753		kdsC	0.673752
lpxC	0.737317		rlmF	2.56803		yeaC	1.42817		yccT	0.798256		yigI	0.903895		yhfT	1.57667		hslO	0.363326		ydfX	1.27139		rpsU	1.54483		yqjC	1.09566		astE	0.665456
ycgH_2	0.73626		rayT	2.53623		ybgD	1.40791		yjiC	0.79457		yncK_1	0.898007		rsxE	1.57279		yciY	0.355761		trpS	1.26633		ftsL	1.54273		proK	1.09304		yhhN	0.660875
ogrK	0.735833		livG	2.53464		yqaA	1.40593		pnp	0.791961		rpsE	0.8972		fabH	1.56756		yifE	0.355163		sdhD	1.26528		dacD	1.53822		lexA	1.0874		yigE	0.660825
yjgX_1	0.721625		yifL	2.49742		ycgZ	1.40504		acpP	0.7814		gltW	0.892187		argU	1.55713		pqiB	0.352373		yajC	1.26527		pyrD	1.53556		yeeN	1.0827		xapA	0.659791
prfA	0.716202		rrsA	2.49005		yciC	1.39465		lptA	0.780376		ycjW	0.889966		purB	1.55352		rph	0.352364		pstA	1.24528		livG	1.53503		ymfN	1.08263		yjdA	0.657307
yfjI	0.705251		elaD	2.44952		yfjL	1.38034		prfA	0.778491		murF	0.888897		rnr	1.54742		hflX	0.350593		yigP	1.24465		iraM	1.52542		b0165	1.06975		yhjJ	0.653884
yraI	0.694491		mqsA	2.44683		fdx	1.37906		trmI	0.777631		tisA	0.886332		hemD	1.54665		ihfA	0.328881		glgB	1.23893		ariR	1.51981		ycgL	1.05061		C0719	0.653373
ihfA	0.693073		rpsP	2.43576		glvG	1.37573		thrV	0.774614		intF	0.885385		sspB	1.53526		yabQ	0.328817		dnaK	1.22727		ydfW	1.51735		glnU	1.04763		citG	0.644509
rluC	0.672894		ydjK	2.43248		agaI	1.37403		der	0.774026		yjdJ	0.884441		accB	1.52621		ycaR	0.326375		yiaL	1.21972		yfaH	1.50883		hokE	1.04734		deoA	0.643556
rpsM	0.65037		yccF	2.41872		ynfO	1.37218		yegJ	0.759038		insB-7_1	0.883666		yceI	1.50604		ydcY	0.324887		rplA	1.21596		miaA	1.50481		yfaD	1.04636		gspJ	0.643521
csrA	0.646999		gnsB	2.399		ydiH	1.35248		tatA	0.757254		aldB	0.881742		yqeC	1.48083		nohA	0.319448		ymgG	1.21345		ulaE	1.49866		yafV	1.03937		yhjH	0.641601
rrfF	0.646204		ykfA	2.39474		yfdR	1.3521		ydcM	0.756044		insG	0.871983		yqiH	1.47895		lpxA	0.318639		tpke11	1.20332		yfjU	1.49727		dicA	1.03922		sbcC	0.638931
fabB	0.642442		hybF	2.39302		ydjH	1.34844		prmC	0.753403		glnS	0.871823		ykfL	1.46155		yjhV	0.315863		ydfN	1.19006		mraZ	1.4963		ynaI	1.03832		phnD	0.637939
tufA	0.639888		rpsD	2.38943		ykfJ	1.34374		racC	0.750898		ileY	0.871589		cyaA	1.43875		yigF	0.315621		lepA	1.18989		fimZ	1.49406		yjgH	1.03354		ybaO	0.636398
glyT	0.632033		ibaG	2.38813		yedM	1.33813		msbA	0.745517		ygeH	0.862149		cydA	1.43536		ydaE	0.314691		asnW	1.18967		yijF	1.49366		ychG_1	1.03251		wza	0.636206
ydfW	0.625584		rplB	2.32926		ahpC	1.32036		wbbL_1	0.743571		cbpM	0.854539		sroG	1.43307		argW	0.314596		atpH	1.18936		ydfU	1.41732		gsiC	1.02849		malF	0.635939
b0165	0.608317		feaB	2.30678		sraA	1.31562		ihfA	0.739459		fadK	0.852895		yidK	1.4274		htpG	0.30839		csrA	1.16994		tfaE	1.41296		ftsB	1.01277		preA	0.634682
insH-9	0.607376		rplW	2.30465		maeA	1.30927		lpxB	0.739399		ibaG	0.844865		pfkA	1.42701		ahpF	0.308363		cysT	1.16947		rluA	1.39944		yfdR	1.01076		napF	0.630887
rcbA	0.607051		rpsA	2.28502		mgtL	1.3056		argW	0.73338		yfjQ	0.844125		yeeT	1.41791		yhiN	0.306918		tyrS	1.16616		yedY	1.39916		ymfS	0.997058		nrfD	0.626634
spy3'	0.604763		nusG	2.27665		rsmE	1.30214		mdtN	0.732581		prfA	0.842011		cysT	1.41487		ykgL	0.304175		suhB	1.1606		yedV	1.39212		frmR	0.987113		ppdA	0.626252
araA	0.600906		hdeB	2.27249		waaJ	1.29916		yceD	0.730187		fliZ	0.83595		tktA	1.38446		yejF	0.303921		polB	1.14236		argS	1.37978		b1364	0.98593		otsB	0.623695
cdsA	0.600092		rpsR	2.268		ygjR	1.29078		yoeI	0.72787		rpoB	0.831303		rpoH	1.36829		seqA	0.301918		yicI	1.13433		yddH	1.37562		yibA	0.979379		yjfM	0.620946
ykfJ	0.595263		pheT	2.2636		intR	1.28816		yfiB	0.720931		ariR	0.829699		yghE	1.35867		thrW	0.301829		metY	1.11318		yibA	1.36502		moaB	0.97682		rutD	0.620913
nusA	0.588768		frr	2.25136		yqeH	1.28478		kdsC	0.707631		ychS	0.829432		b0725	1.33757		yjdK	0.300733		fkpA	1.11288		waaG	1.35463		ydfV	0.976609		yiaF	0.620034
dnaG	0.576447		srlE	2.23589		rrsD	1.28451		sspB	0.705597		arfA	0.827319		ykfK	1.33744		yedY	0.299427		frr	1.10006		ydgD	1.35086		ygaM	0.975456		ygfT	0.618996
rplB	0.570741		leuS	2.22369		insK	1.27981		yffO	0.702539		yagB	0.827121		hscA	1.33565		ispH	0.298837		ftsY	1.09813		rhlE	1.3503		nfrB	0.975364		csrA	0.618875
insH-7	0.570336		rimK	2.21028		pspD	1.27628		sroD	0.696147		hypE	0.826306		iscA	1.3313		ydfP	0.298584		lysW	1.09667		yegJ	1.34998		yffS	0.970148		secF	0.618828
rpsS	0.567298		glyQ	2.19037		insB-3	1.27618		guaC	0.691449		ydbL	0.822674		aceF	1.30713		trmH	0.297038		gltW	1.09342		ucpA	1.3499		ycaR	0.968466		araA	0.617871
sroE	0.566688		mreB	2.18404		yafY	1.27532		rnr	0.690885		ldrA	0.822609		ohsC	1.30638		yjgW	0.293993		yqfG	1.09134		queE	1.34586		yjdP	0.967702		malS	0.617505
yagA	0.566487		yjbI	2.17241		yeeP	1.26958		rplE	0.686909		leuS	0.820855		yddE	1.29431		ridA	0.2938		yfdQ	1.08804		smrA	1.33395		minD	0.967473		proC	0.616969
rplV	0.561618		ssb	2.17199		cdsA	1.26713		yfjY	0.678727		gloB	0.81716		yqjD	1.29388		yhcB	0.290242		rsfS	1.08176		hchA	1.33146		murG	0.966496		ykgO	0.616269
rpsD	0.560855		yfdR	2.16568		yjaZ	1.26681		secM	0.6781		racC	0.817073		groL	1.28621		rihA	0.287271		ybeD	1.07314		yrdD	1.32684		yjiA	0.962902		gshB	0.606082
pbl	0.551403		psiF	2.15845		ybcV	1.26576		nsrR	0.674834		ydfP	0.81596		fabG	1.26928		ymgI	0.283952		yidD	1.06733		ycgH_1	1.32511		yabQ	0.962139		lrhA	0.602398
icdC	0.547903		yjiA	2.15419		ypjM_3	1.25884		yihM	0.67199		yegR	0.815585		rffC	1.26661		dxr	0.280654		yhcO	1.05265		yfjM	1.31703		astC	0.961512		queD	0.598659
racC	0.542588		topA	2.14783		yffR	1.24874		hupA	0.667484		deaD	0.814967		sdiA	1.25004		ybiI	0.280646		rpmB	1.05182		yhjJ	1.31205		arpB_1	0.961154		ycjF	0.594605
yagM	0.539414		ybcH	2.14031		mtfA	1.24685		ychS	0.666492		serA	0.813751		rph	1.242		alkA	0.280545		secD	1.04136		yfiF	1.30858		ygfI	0.961134		ynbA	0.594417
fadR	0.536172		yoaH	2.13663		aspS	1.24309		tomB	0.666476		yaiZ	0.810225		yhhL	1.24156		yqeH	0.278698		yrfF(igaA)	1.03999		nrdB	1.30821		ftnA	0.958174		hybC	0.588648
trpS	0.534127		ybcF	2.13435		argR	1.24019		yffR	0.665805		micC	0.807264		mdtB	1.23137		waaA	0.278118		rpoD	1.03699		rpsT	1.30685		ymfR	0.950746		aroF	0.58017
prmC	0.533099		rnlA	2.12476		rpsI	1.23987		nusG	0.665669		thrV	0.801926		accA	1.22531		prkB	0.277036		yncK_1	1.03575		yehD	1.29905		mepH	0.946079		sugE	0.576446
glnS	0.530124		ycaI	2.11631		bssR	1.23948		waaA	0.663111		yfdK	0.801727		fusA	1.22345		yqjD	0.273969		pinE	1.03308		gluQ	1.2948		yedJ	0.944756		ampH	0.575721
yhcB	0.525123		fkpB	2.107		qor	1.23811		yjdP	0.663086		rplE	0.801397		secG	1.20809		ispG	0.273906		ffs	1.0276		tdk	1.29403		yajC	0.942368		tktA	0.573791
rlmE	0.522482		aspS	2.10487		nmpC	1.23323		ydfN	0.661503		smf	0.799065		ptsI	1.20475		rnpB	0.272133		lepB	1.01601		yfdQ	1.28898		ydfI	0.938775		hsdM	0.571839
lptB	0.514488		ycaM	2.102		pspE	1.23035		cdsA	0.661182		rph	0.799041		leuS	1.19471		maeB	0.270607		mreB	1.01047		yiaA	1.28082		yfcA	0.935203		hofB	0.569218
yjcF	0.50964		fimC	2.09999		ybgI	1.22689		surA	0.66079		yncL	0.797192		lit	1.19006		ysaB	0.268981		rnpA	1.00971		ynjD	1.27221		typA	0.934086		ydhR	0.567329
hybC	0.502405		yhjH	2.08317		slyD	1.22432		yfiP	0.659356		tsaE	0.797061		aceE	1.1871		mepS	0.268032		hsdS	1.00744		curA	1.27032		yghS	0.933922		bisC	0.566173
ydaT	0.498749		rpsL	2.08047		yafO	1.21387		ydfT	0.657317		ygdT	0.796474		moeA	1.18348		iscR	0.266134		yafY	0.997222		rlmE	1.26373		ftsW	0.93273		hyuA	0.562534
lolA	0.497695		murB	2.07078		rsxB	1.21136		serA	0.657065		yjhV	0.794673		thiE	1.18024		gfcE	0.264951		yjjP	0.994966		yfcC	1.26317		ftsK	0.932045		glnG	0.561228
ymdE	0.492916		aegA	2.06971		flu	1.20808		yfjW	0.64673		ftsI	0.791737		raiA	1.16584		yibV	0.263829		hfq	0.994157		ispU	1.26182		agaB	0.931077		waaJ	0.559643
ycgH_1	0.492812		hisS	2.06802		yabP	1.20182		tfaE	0.64669		recA	0.788297		ybiT	1.16554		dxs	0.263528		tyrV	0.989375		puuR	1.26159		yhaK	0.929131		yeiE	0.558164
yqgE	0.491665		lpxA	2.06669		yaiZ	1.1997		ydbH	0.645298		yhhI	0.781935		csrA	1.16499		tomB	0.262958		hslV	0.986706		waaP	1.2611		ycfP	0.922321		ratB	0.556249
sspB	0.486507		yhcM	2.05548		arrS	1.19159		hscB	0.638686		yhhQ	0.779968		accC	1.16165		glpD	0.260471		rodZ	0.982188		racC	1.26014		ybdN	0.918793		fmt	0.554919
yfiB	0.484443		galM	2.05274		chbR	1.19006		cca	0.63693		phnE_2	0.774576		tp2	1.15707		mnmG	0.258762		rpoB	0.98185		rhsA	1.25921		rzpD	0.907291		ydeR	0.554534
bcsG	0.484334		rplD	2.04241		yfdQ	1.18642		rnb	0.629894		dsbA	0.774439		ribA	1.15636		ibpB	0.258491		rpoC	0.978093		yneE	1.24091		yafZ	0.905198		sdiA	0.554024
gadE	0.48143		sbcD	2.04209		ibaG	1.18547		yhhQ	0.627335		yqcG	0.77367		yedS_2	1.15331		renD	0.258456		ymdA	0.974913		dcrB	1.23623		nmpC	0.90453		eutK	0.553612
frr	0.480007		ileS	2.03453		iraM	1.18184		yhhA	0.627211		rpsC	0.773202		yccA	1.1488		serX	0.255671		fusA	0.973204		tauB	1.23294		yddA	0.904305		yhaK	0.553506
rlmM	0.478934		rpsJ	2.02988		ycbZ	1.17284		fur	0.622447		tusB	0.76984		araA	1.13829		yafD	0.255004		cpdB	0.968114		ypjC	1.2311		ygcU	0.901968		ydiJ	0.553113
sra	0.475628		yaiL	2.02965		greB	1.16921		insB-7_1	0.621678		citC	0.769348		crr	1.13232		ansB	0.254899		secF	0.967311		ypfJ	1.22366		ygdR	0.899243		ycjG	0.551084
rpmI	0.474163		yibL	2.02067		lysU	1.15963		rpmJ	0.620623		tff	0.768809		gmk	1.13221		yehX	0.253897		cysS	0.965121		yfgC	1.21918		argV	0.897437		exbD	0.550934
ribA	0.471456		yfaX	2.01217		yegR	1.15863		trmH	0.615005		hemN	0.767279		renD	1.12792		ykiA	0.253862		kdpB	0.963273		yehK	1.21841		hybE	0.894251		adhE	0.550572
rpmJ	0.469184		hsrA	2.01099		ligT	1.1473		wbbL_2	0.610473		gltX	0.766853		yfbU	1.12344		yicC	0.252954		ybiJ	0.960691		selA	1.21185		ydfD	0.889873		yeiG	0.547375
flu	0.468852		mhpB	2.00873		mazE	1.14477		lpxD	0.609596		murG	0.766813		fbaA	1.10887		oxc	0.252938		hslU	0.960194		bcp	1.21085		secB	0.884245		ydcI	0.547337
cspI	0.468149		prmC	2.00852		ydaS	1.1432		asnS	0.609208		ydhV	0.763568		lolD	1.10704		ttdT	0.251424		yhcG	0.955416		pgm	1.20795		yfdP	0.88406		yeeJ	0.545954
ymcE	0.466096		flk	1.99757		ykgH	1.14223		ybcC	0.606231		ypdF	0.758991		pabB	1.10434		b1364	0.251411		glnS	0.952568		yahG	1.20573		yceO	0.882945		ydcT	0.543959
csiD	0.465975		nfrA	1.99017		rpsB	1.14175		crr	0.603822		hspQ	0.757116		yaiV	1.09369		ymfP	0.251246		yfjW	0.951143		sokC	1.20539		ftsL	0.879384		pdxJ	0.543194
yafK	0.464378		mukF	1.98125		torI	1.13764		xanP	0.603296		insH-3	0.75605		rbsK	1.08166		selB	0.251157		sroE	0.946741		ybdF	1.19862		ydjI	0.878741		ymgE	0.540146
glyW	0.46161		tap	1.97189		envZ	1.13236		ygaY	0.601352		rplB	0.752964		nsrR	1.07792		yqeJ	0.250683		cspB	0.945754		slyX	1.19847		ypjC	0.877404		cbrC	0.539974
yebV	0.461295		valS	1.97095		uspA	1.12258		ruvA	0.600924		carB	0.750808		lolA	1.05079		yqjH	0.248319		yciS	0.933165		yjdK	1.18868		moeB	0.875506		arsR	0.538655
mepH	0.45735		yegX	1.97043		yijD	1.1201		insJ	0.600196		hybF	0.747242		accD	1.04923		tsaE	0.247686		aspV	0.930085		insN-2	1.18817		yjhV	0.873959		npr	0.538311
trpT	0.455725		ppdA	1.97032		rpsC	1.1152		ribF	0.600083		fnrS	0.7458		gapA	1.04563		rfbC	0.24716		yicC	0.925904		yeeS	1.18639		ymcE	0.873638		endA	0.537368
yneM	0.455706		serV	1.96867		arsR	1.11352		ubiH	0.599259		ydaG	0.741586		yhgA	1.04455		ytfJ	0.246458		ydfP	0.924692		yneL	1.18271		ligB	0.873197		ygcE	0.537012
ysaB	0.455113		yeaW	1.95894		dmsB	1.11161		ybhP	0.598525		ycjY	0.74049		yqjI	1.0445		lolB	0.246429		ygbJ	0.920743		yciO	1.1811		yncL	0.870933		yidL	0.536344
gapC_2	0.453934		accA	1.95342		tyrT	1.11111		sapC	0.596446		ydfD	0.740377		rplI	1.04243		fkpB	0.24624		phnO	0.911777		sufE	1.1773		omrA	0.870317		rutR	0.535989
lpxA	0.453376		yhcC	1.94703		yghA	1.10903		eyeA	0.596058		waaU	0.735962		ilvD	1.04057		yqfG	0.246124		sdhC	0.903461		sraB	1.17235		ybgT	0.869199		lptG	0.535771
ratA	0.449245		glcD	1.9456		phoP	1.10694		rydC	0.59253		hokE	0.735828		rpmF	1.03801		ycjV	0.246071		azoR	0.899302		rpsK	1.16869		yfcQ	0.867931		mnmE	0.531499
ycjV	0.445807		rfaD	1.944		rsxC	1.10531		yajL	0.592468		rprA	0.734618		pgk	1.03621		uvrA	0.245764		dicC	0.898109		yidX	1.16112		bamD	0.866104		ggt	0.530768
amn	0.444426		sseB	1.94246		ybdF	1.10267		sokE	0.591193		ogrK	0.733291		proL	1.03593		recJ	0.245162		C0343	0.895421		yfjD	1.16084		insB-7_1	0.865617		yfeA	0.530697
ycfZ	0.44319		fliD	1.94116		yfeD	1.10173		rnpB	0.590867		nohB	0.730307		dppB	1.03129		psd	0.242553		rpoH	0.895077		yigI	1.15687		pmrR	0.864683		ybeX	0.52962
proM	0.441603		ycfZ	1.93917		ybiB	1.09155		recO	0.590254		C0465	0.729839		eno	1.02601		yeeT	0.242388		rpmG	0.894833		yoaA	1.15248		ykgB	0.863127		yedL	0.528602
yfdQ	0.440996		ydfX	1.93296		argF	1.09147		yagH	0.583871		rrfF	0.729711		cas1	1.02081		bcsG	0.241044		ygdQ	0.893381		prpB	1.15243		sufB	0.862794		yjjN	0.526067
ytjA	0.440719		proS	1.93161		ispU	1.08252		iscU	0.58377		gluQ	0.727869		ygiA	1.01863		borD	0.240663		tufA	0.89027		leuU	1.15205		era	0.862388		smpB	0.524127
yeaO	0.437862		mntP	1.93024		ycfK	1.08232		rspB	0.582711		ycdX	0.72552		torT	1.01663		ydcX	0.239892		otsA	0.887972		cytR	1.15111		rbfA	0.861583		yiaD	0.517633
yqjH	0.436974		arsB	1.92727		rplK	1.07948		ydhX	0.582421		sieB	0.72473		yhjJ	1.01531		frsA	0.23951		yjdN	0.883375		cbtA	1.14235		ypjF	0.860691		ydcO	0.515988
rydB	0.436815		higA	1.91983		yhaH	1.07875		slyX	0.58119		yeeL_2	0.724584		ybhN	1.0147		argS	0.239192		secA	0.883357		ydcZ	1.13887		cspA	0.860628		wcaB	0.513333
ycdF	0.436309		yggS	1.90811		yeeA	1.07574		flk	0.579765		ybfL	0.722711		frlC	1.01377		insD-6	0.237464		rluD	0.879709		molR_3	1.13395		ydhF	0.860449		sbcD	0.512565
sibE	0.435775		eptA	1.90745		yjfY	1.07486		yhcB	0.579757		srlE	0.721439		nrdF	1.00138		yaiT	0.236893		mntP	0.878205		smtA	1.13357		ybcQ	0.859846		nudJ	0.512021
ychS	0.435395		gsiC	1.89431		ypfJ	1.07401		fabI	0.577017		yfjK	0.718529		mglA	0.993829		yejG	0.236143		yqiH	0.874081		insI-3	1.12985		ymfP	0.859474		yaaU	0.510797
rsmF	0.434218		pheS	1.89337		yadC	1.07292		hyaD	0.576983		hisR	0.717972		bioF	0.991194		ssb	0.235911		eda	0.872001		paoD	1.12938		flu	0.852964		alsK	0.50892
ygeI	0.431357		Phantom Gene	1.88993		adrA	1.06924		obgE	0.576581		lptF	0.71481		acnB	0.990178		ygaQ_2	0.234909		maeB	0.865239		amn	1.1264		cheR	0.851813		malK	0.508737
oxc	0.429642		cysS	1.8833		yjbL	1.06644		ribA	0.573711		nmpC	0.714433		ygjV	0.984927		proL	0.234269		dsbA	0.865212		ygjP	1.126		uvrA	0.850357		thiG	0.507425
iraM	0.429605		rplX	1.87206		wbbI	1.06614		yncE	0.568209		ybfD	0.712042		secE	0.984778		yidD	0.233706		sxy	0.863714		ykfF	1.12349		murF	0.850033		ybjP	0.503765
ygeR	0.428307		pgpC	1.86969		yjbJ	1.06549		rlmE	0.565855		yihI	0.708137		iap	0.978759		ytfL	0.2328		rrlH	0.861891		hsdS	1.11604		yaaX	0.845619		phoP	0.503312
rem	0.426905		phnC	1.86724		ygbI	1.06025		cysZ	0.564557		cas3	0.707984		yfbV	0.978451		ygeK	0.232267		yebS	0.856229		proL	1.1141		C0719	0.836999		rutC	0.501663
fxsA	0.426063		folX	1.86532		rplP	1.0591		rpmG	0.563421		ygeO	0.706896		yfgH	0.96804		dcp	0.232092		def	0.85568		degS	1.11102		yphA	0.836474		yciW	0.500731
mcrA	0.425491		alpA	1.86512		allE	1.05574		yegH	0.562745		ycaN	0.703707		ymgD	0.965961		yhfL	0.231296		aat	0.849173		ycbV	1.10958		lon	0.835524		ydjI	0.499637
lar	0.425164		nagA	1.86322		ygeI	1.05475		suhB	0.562428		ileS	0.703659		alkA	0.965498		yecF	0.230315		ygfZ	0.847351		nfsA	1.10632		ftsY	0.835228		yhfX	0.499141
alkB	0.42455		lpxD	1.85383		mdtP	1.05335		norV	0.560695		bssS	0.700797		rpiA	0.954089		fbaB	0.229819		rnt	0.84637		tamA	1.10402		rsxD	0.828551		idnR	0.497327
intE	0.424122		hflC	1.85044		ydbH	1.05174		def	0.554093		ycjQ	0.700517		fucU	0.950468		uxuB	0.229818		ybiX	0.841858		ybiI	1.10273		tas	0.825039		alsA	0.494882
yjdP	0.423878		ydcX	1.83837		bax	1.04774		yqcG	0.551254		rimP	0.69949		ppiD	0.949774		dhaR	0.229252		sspB	0.840819		trpT	1.10086		rcbA	0.819328		ycfL	0.494191
intD	0.422996		secY	1.83607		wecH	1.04231		fabH	0.550745		rrlD	0.698738		ribF	0.949587		mdtK	0.228825		yfcL	0.833342		yccF	1.09952		nrdD	0.81867		ydbC	0.493606
essD	0.422257		pqiB	1.83159		blr	1.04221		rseP	0.550512		ythA	0.697089		prs	0.945687		ilvI	0.227819		valS	0.831236		yegP	1.09836		ytfT	0.813994		fumB	0.493406
dbpA	0.421646		ddlB	1.8288		yagL	1.04114		creD	0.54985		yfdH	0.695742		pdhR	0.943889		yciI	0.227818		ppk	0.830537		rpmD	1.09777		hupB	0.81392		grxC	0.490488
ycgZ	0.420811		rpsH	1.82492		ydaQ	1.0391		eutP	0.547943		valS	0.695555		ttdR	0.942292		tfaS	0.226595		yeaC	0.830457		yjhD	1.096		rem	0.813429		nemA	0.489511
ydfO	0.420648		rpsN	1.82446		kefG	1.03854		yjhE	0.547431		ymdE	0.69457		yaiE	0.940491		ubiD	0.226323		rsxA	0.828493		ydcS	1.09531		hybC	0.81255		yeaR	0.489433
hcp	0.419183		rrfF	1.81869		ynjI	1.03693		ymcE	0.544078		yhcH	0.691589		acpP	0.935268		C0299	0.225963		rplK	0.826713		sroG	1.09228		gspJ	0.81249		yedF	0.487126
yfjY	0.417504		rpsC	1.81721		ybbD	1.03526		nusB	0.542993		rhoL	0.689754		prfA	0.933197		exbD	0.225594		hflK	0.823842		yhgA	1.09178		yebY	0.812001		yaiF	0.484084
sdsR	0.417162		thrS	1.816		molR_2	1.03187		ygeW	0.537962		lpxB	0.689106		bssR	0.932764		yniB	0.225187		yfjH	0.822334		ymfR	1.08688		yffP	0.811202		fimD	0.483037
holC	0.415354		agaI	1.81294		ymfE	1.03124		yjhH	0.537652		ydaU	0.687397		yjiG	0.932425		ybfQ	0.224946		ryjA	0.820802		rpsQ	1.08461		safA	0.810908		yjhP	0.482261
ydfR	0.415332		waaC	1.81144		moaB	1.02825		typA	0.53667		glgB	0.685736		yigP	0.930331		rodZ	0.224738		mrdA	0.819614		yecJ	1.08444		yejK	0.810006		panC	0.482212
ybcL	0.414602		trpS	1.81135		csgG	1.02515		iraM	0.534984		ydfO	0.685502		yjjY	0.923519		paaX	0.224468		rpsI3'	0.817316		grpE	1.08178		insO-2	0.808492		tyrS	0.477948
yieK	0.414545		glcG	1.80868		rrrD	1.0225		yfeK	0.534022		yeeW	0.678049		dhaR	0.92286		acrZ	0.223685		ydaY	0.816788		psrO	1.08123		lar	0.805635		dtd	0.475584
ispE	0.412479		asnS	1.79922		kilR	1.02232		ptsN	0.532735		ybhK	0.677453		yfiM	0.921744		yoaD	0.223495		yedS_2	0.815788		ydfD	1.07258		amiD	0.804307		ydeP	0.475307
chpB	0.411896		ydhK	1.79776		pyrC	1.02114		ynbA	0.528929		plsB	0.677314		speF	0.919987		sspB	0.223438		map	0.812261		ybgD	1.06644		yegX	0.804234		xerD	0.473258
ybfE	0.409283		metG	1.79233		lptB	1.01763		ymfD	0.527664		fadR	0.677071		sroD	0.918638		xseB	0.22152		rcdA	0.811674		hinT	1.06484		hofN	0.80142		yqeA	0.473175
ppx	0.408727		rpsS	1.7888		yfjZ	1.01735		phnC	0.526431		ymfM	0.674312		ydiP	0.916797		rsmE	0.221356		ygiF	0.811673		ynaI	1.05917		fabB	0.800508		greA	0.47309
mntR	0.405722		hipB	1.78678		rpsK	1.01334		blr	0.521164		yciH	0.67309		nuoG	0.91506		csgA	0.220721		treC	0.809426		deaD	1.05682		alsC	0.800031		avtA	0.468843
tpke70	0.405273		fliC	1.78613		yaeH	1.01169		intD	0.520104		yifB	0.671981		yfiP	0.909484		cusS	0.220484		serV	0.808334		ybjN	1.05164		bfd	0.797531		trpD	0.467125
guaA	0.404757		yibQ	1.78424		ydfO	1.00953		fdhD	0.518946		mdtN	0.671279		nagA	0.909038		gfcC	0.220283		lysS	0.807509		yeaW	1.05139		pepP	0.79558		wcaD	0.465346
yobF	0.403902		malI	1.78352		rplV	1.00864		ribE	0.517931		yoeI	0.670953		secA	0.908419		b0725	0.219054		mdtB	0.807363		yeaO	1.05063		priC	0.794385		tusB	0.465339
sibD	0.403312		ihfA	1.78322		ynaJ	1.0083		fabD	0.517595		yjhX	0.670161		yeaC	0.899571		lpxC	0.218779		mdtK	0.806897		essD	1.04456		argW	0.794134		hscB	0.465282
aceK	0.401031		yjeM	1.7816		ygdH	1.00386		ychG_1	0.515889		yffR	0.667402		yfcP	0.895405		yaiA	0.218157		yigZ	0.806524		yqjG	1.03782		rlmI	0.792595		cbl	0.463764
yhdJ	0.399043		tyrR	1.77501		selB	1.00274		yddK	0.514415		ybhP	0.666242		yhcG	0.894112		ygbE	0.217965		insH-3	0.806242		yhjX	1.03622		yidC	0.792018		sraF	0.463643
yeiW	0.397631		mhpC	1.76706		istR-2	1.00083		ubiI	0.514038		ydcX	0.665449		yggR	0.892427		sroD	0.217808		mukF	0.805533		hscA	1.03583		lptD	0.790952		yidK	0.463084
cas3	0.397226		waaZ	1.7656		ftsW	1.00003		chaB	0.513094		ynfC	0.665055		pheU	0.889473		sdiA	0.216963		paaB	0.805089		serS	1.03409		IS128	0.784609		entA	0.461519
def	0.396056		corA	1.76297		fruB	0.999271		ftsX	0.511728		hemL	0.66052		proK	0.887092		yfjK	0.215278		pfkA	0.802703		yhhY	1.0322		ygeG	0.781616		thiE	0.457143
ycfH	0.395978		ybcD	1.76166		yhhY	0.996078		insH-1	0.511725		dinI	0.660076		argT	0.885565		rutD	0.215165		envY	0.801011		yjdJ	1.03191		accC	0.780982		gltP	0.455956
bssS	0.395756		yqhG	1.76035		dctR	0.98733		rpsE	0.511575		yfaD	0.659578		yadM	0.885432		tsaD	0.214879		parC	0.79439		murC	1.02874		uvrD	0.780579		murA	0.45483
rnlB	0.395319		rplF	1.75745		menB	0.986813		yebV	0.510398		hofN	0.659		yehU	0.882944		sokC	0.214389		gfcC	0.793708		sgcQ	1.02834		rpmB	0.777974		dgoR	0.454506
mprA	0.395218		argD	1.75587		ybgA	0.985349		symE	0.510333		yehK	0.658838		yibT	0.882354		yjhX	0.21395		rpiA	0.791358		yhjC	1.01774		fxsA	0.77694		yicI	0.454363
ygiZ	0.393739		rzpD	1.75241		creD	0.984982		yghB	0.510293		yeaX	0.658829		yfjU	0.881477		leuD	0.213909		ppx	0.791148		ybeU	1.01345		ybcV	0.774171		rssA	0.453988
aes	0.392515		leuX	1.7502		asnW	0.977832		eutA	0.507673		purC	0.657766		ispU	0.878214		yhhZ	0.213719		ymfD	0.789938		murI	1.00954		ftsE	0.773807		osmF	0.453653
intF	0.392069		mhpF	1.7481		uxaB	0.975814		ydaT	0.506699		eutA	0.656781		caiE	0.87474		yfbU	0.213421		intB	0.78186		cbrC	1.00952		fabA	0.772777		fsaB	0.453312
ygeK	0.391553		ydcL	1.74549		rpmC	0.971932		renD	0.505996		purB	0.654622		ygcG	0.870685		ppsR	0.213403		truD	0.778308		ygiA	1.00952		sibE	0.771456		amyA	0.452614
flgA	0.389485		fabZ	1.732		smg	0.968746		rnhA	0.505526		sokE	0.654427		yhdH	0.868506		ypdC	0.213158		glnU	0.777737		ydhY	1.0093		nudL	0.771071		napD	0.452201
yffQ	0.389019		ydhY	1.72422		bdm	0.965397		lsrK	0.505225		ypjM_2	0.654252		rnhA	0.866943		rfbB	0.211737		sucA	0.77438		intQ	1.00456		purL	0.770628		fau	0.452105
corA	0.387105		rpsB	1.72213		yfcS	0.960267		ppa	0.502102		slyX	0.652954		hydN	0.863497		treB	0.211466		sroD	0.774126		yliI	1.0032		pyrI	0.769245		yeaP	0.451763
msrC	0.386704		serS	1.72184		yebS	0.957526		fruL	0.499872		yhcA	0.652812		ymfQ	0.862956		ybdH	0.211055		clpB	0.772433		yqfA	1.00221		yjcC	0.766819		yebF	0.450826
asd	0.38646		fryB	1.71462		amn	0.955903		yggF	0.499374		rplD	0.651171		yjiN	0.858306		gluQ	0.210596		intD	0.771172		rpoD	1.00115		ygeL	0.766509		yifE	0.450753
ppiB	0.386287		ybhC	1.71204		idnD	0.954224		ydhU	0.498111		sbmC	0.650289		rsxA	0.856953		ydfJ	0.209943		hypF	0.771163		yfjW	1.0011		yciQ	0.765721		evgS	0.450453
smpB	0.385727		umuC	1.71089		yegQ	0.951847		pepN	0.497123		ycjD	0.646759		yeiL	0.851278		feoB	0.209857		ftsH	0.763986		fbaA	1.00056		hslU	0.761819		elfC	0.449577
efeU_2	0.385281		ydjE	1.70812		ychG_1	0.948709		insN-2	0.494401		rrlA	0.64594		oxc	0.848318		bioF	0.20947		yffP	0.761891		bssS	0.999795		norV	0.757911		cysK	0.449203
yjjY	0.385173		yfdQ	1.70684		trpT	0.945353		sseB	0.494347		mraY	0.645178		rpsR	0.8478		hha	0.20945		nagZ	0.761023		yahI	0.99872		feaR	0.756735		hyfG	0.448544
ydhX	0.384993		gntX	1.6995		hokD	0.944367		yqgE	0.492722		ycjM	0.644187		yciI	0.845701		ylcI	0.209121		yjiP	0.758171		hyfJ	0.998367		ykfA	0.755233		ycgY	0.447404
xdhD	0.384345		gloB	1.68903		ybeU	0.943357		yjeF	0.491902		guaA	0.644118		aroA	0.845497		icdC	0.208967		araA	0.757073		prmC	0.997991		yafN	0.754798		lpxC	0.445023
yfjW	0.383901		lit	1.67264		norW	0.938971		rsmB	0.490494		ybcQ	0.643424		ylcI	0.844622		yoeA	0.208208		hybA	0.756771		yjbQ	0.997467		secA	0.754212		yhaL	0.444432
yiiE	0.383436		yibT	1.67042		yafX	0.937088		yhjG	0.489667		yhhY	0.638702		b0100	0.842598		pstS	0.208064		fldA	0.752043		pptA	0.995873		ygfT	0.752611		pstC	0.444157
yiaM	0.382395		yijO	1.66914		mreB	0.936039		secB	0.489054		ymfH	0.638286		yfdI	0.84227		ubiI	0.207613		pth	0.751643		fsaA	0.995436		dsbA	0.750643		upp	0.443164
dcp	0.381105		ucpA	1.66642		ytjA	0.933694		mokB	0.488811		mnmA	0.636949		hscB	0.840047		udk	0.207193		lolD	0.748417		clpP	0.995227		dinB	0.749479		gltX	0.440938
hisR	0.380347		yceH	1.65917		sgrS	0.929582		csrA	0.486686		ykfF	0.635246		yfdO	0.839345		ygaU	0.206082		rpsP	0.747259		gapC_2	0.992768		yiaB	0.748115		eutS	0.440637
insM	0.379975		cobS	1.65875		hofN	0.928838		yibI	0.486241		yejH	0.633413		cutA	0.837464		yfdP	0.206053		tgt	0.746988		yjcZ	0.992236		rrsD	0.748017		gltI	0.440545
pcm	0.379453		ynjH	1.65322		ychH	0.927894		yadN	0.485404		yfiE	0.63277		rsmC	0.834781		sokE	0.20508		cheY	0.745847		aspS	0.992161		dsrA	0.745907		yciT	0.439844
ymgG	0.379265		queG	1.65239		ycaR	0.927741		yagG	0.483703		yqhD	0.631464		fbaB	0.834247		ispA	0.205008		ygcN	0.745416		yaiX	0.991639		hyaD	0.742933		rnpB	0.437363
yafX	0.377664		yeaL	1.64627		yneG	0.926526		dnaX	0.481455		kilR	0.630877		ygeH	0.833475		secM	0.204897		rbn	0.745101		qor	0.987689		yqjE	0.742749		mdtC	0.436303
yjeO	0.376012		murQ	1.63645		yghT	0.924449		ypdJ	0.480922		ygaQ_2	0.629019		yjjQ	0.832133		tisB	0.20402		rpsG	0.744761		yihG	0.986573		yiaW	0.740541		yohD	0.434161
ynjF	0.375641		yjiT	1.6322		ychE_2	0.920836		smpB	0.4807		yhjH	0.628179		tatB	0.82979		sbcD	0.203933		yhhZ	0.743933		moeA	0.985153		ydcI	0.740451		ynfM	0.434074
rhaA	0.373466		ydcZ	1.63087		mdtO	0.91583		yegZ	0.479789		tam	0.626642		yhfA	0.829121		ycfH	0.203763		recR	0.741059		pnp	0.984878		yhhN	0.739753		ftsI	0.433824
yfbM	0.373162		ycfJ	1.62989		sppA	0.913128		lpxA	0.479667		yrhD	0.626298		yadD	0.825878		rfbA	0.203643		yliE	0.741053		adrA	0.982323		tyrR	0.739384		groL	0.430567
tag	0.371503		yihN	1.62955		lpxA	0.912757		leuU	0.479103		yehM	0.625264		rbn	0.822454		ycbV	0.20323		sdhA	0.74105		ybbC	0.981312		pqqL	0.739345		tesA	0.429426
ahpC	0.371155		lysC	1.62766		yqiC	0.911418		ybhI	0.478779		ydcD	0.621496		ydaG	0.817597		hdeD	0.202986		yjgW	0.740786		ynaJ	0.981109		cspG	0.738804		isrC	0.426956
ygeW	0.371009		yfdH	1.62675		ydjA	0.910649		artJ	0.478741		aaeX	0.620545		yccU	0.815554		rlmJ	0.202836		yeeT	0.739792		yohH	0.980761		metY	0.738471		nudK	0.42684
mrr	0.37077		ygeH	1.62501		tff	0.907266		yncH	0.477808		serS	0.620521		ykiA	0.813871		ppx	0.202732		dcuD	0.738377		yeiL	0.979227		hofP	0.737244		tsaE	0.425434
cysS	0.368239		lptF	1.61958		yhfG	0.906941		rpsO	0.477468		atpI	0.619059		rsxG	0.810133		pstA	0.202677		yfbT	0.737857		gltX	0.978755		sseB	0.736586		ssrA	0.424883
yegJ	0.368113		hemN	1.61546		yajD	0.906797		rlmA	0.475154		ruvA	0.615613		clpP	0.807697		ymfN	0.202628		sucB	0.736127		yhgN	0.978444		dedA	0.734172		yahG	0.424877
rybB	0.368074		pdxB	1.60897		yagF	0.906633		rpsA	0.474227		ybbD	0.615164		pykF	0.807222		yccB	0.202304		xisE	0.733993		yfaS_2	0.978289		lptG	0.734161		ysgA	0.424564
mutM	0.368072		lpxB	1.6076		yjjJ	0.904776		yfdY	0.473885		yedM	0.614857		yfaY	0.805496		nudJ	0.201344		ykfH	0.728275		yqiA	0.975389		yfeY	0.733449		ispB	0.424546
serX	0.367761		znuA	1.60608		ygfB	0.904087		yibN	0.473679		eptA	0.613592		dtd	0.801174		ahpC	0.200616		ydgC	0.726694		rbfA	0.974511		yfgD	0.733369		uxaC	0.423614
ydiH	0.366988		tauD	1.60556		pheM	0.901253		yjfJ	0.473261		agaA	0.612604		araE	0.798762		guaD	0.199701		plsC	0.726499		yehR	0.973153		murC	0.732566		atoC	0.423242
yoaC	0.366439		hpf	1.60441		ygeO	0.899956		rluD	0.473135		rpsF	0.612237		yfgI	0.798314		tpke70	0.19942		rimP	0.726111		yaeB	0.97182		yfaW	0.73131		murI	0.42097
tusB	0.366334		yiiX	1.60122		valS	0.899297		yedF	0.472967		rcnA	0.611057		rpsF	0.797375		truA	0.199111		ycgH_2	0.72553		rplL	0.970591		phoH	0.728501		yjiY	0.419787
typA	0.362875		cca	1.59641		ydiS	0.898531		agaW	0.470885		intS	0.610701		ygeP	0.795593		yhcG	0.199024		metG	0.725519		ybgT	0.967687		cutA	0.728235		mltF	0.418415
yfjX	0.362685		fabF	1.59495		yniA	0.894999		rhlE	0.470051		yehC	0.610664		qmcA	0.795023		oppF	0.196862		nadD	0.724255		uvrA	0.967392		proC	0.723065		arsC	0.418353
pstC	0.361952		fmt	1.59182		plaP	0.8945		gfcD	0.469505		ulaB	0.609286		yliL	0.79501		yfgH	0.196325		ygaM	0.720441		glnS	0.964512		sbmA	0.722945		crcB	0.418258
ychN	0.359872		ytfJ	1.58696		leuU	0.894392		holB	0.469402		yheV	0.609131		aroM	0.790542		nemR	0.195958		gspF	0.719286		thrC	0.960922		ygfQ	0.722244		fadL	0.418041
ynfE	0.359811		yijE	1.58536		queE	0.888833		yegQ	0.468668		ydjY	0.607161		thrU	0.788014		mobB	0.195951		sdhB	0.71768		yoeB	0.960667		ynbC	0.721422		ygdH	0.416757
tfaD	0.359774		accC	1.58282		pabB	0.887342		yhfG	0.468632		yddH	0.607126		ybhK	0.787412		cas3	0.195906		nrfF	0.716667		yagK	0.959281		rbsB	0.719087		yddL	0.414265
yfaX	0.359748		recB	1.58249		ygeM	0.88633		glpG	0.468068		yafJ	0.606333		yfcE	0.784864		yibA	0.195045		yffB	0.71633		cysS	0.958117		cbrB	0.716726		insG	0.413965
ydcX	0.359354		yagP	1.56443		lomR_1	0.881164		prpR	0.465896		fklB	0.603276		yicL	0.782447		nudK	0.194671		trmL	0.716214		eutM	0.957951		yhaB	0.716473		ykgE	0.413947
tatD	0.359226		rplA	1.55809		yahL	0.881009		ubiD	0.463935		fbaB	0.603016		serV	0.780389		cheR	0.194426		yeeS	0.713886		yddW	0.955031		dinD	0.716434		rhtA	0.413205
paaX	0.359		yicH	1.55332		ypjF	0.869528		pyrH	0.462538		ygiL	0.602636		napH	0.78011		prpR	0.194177		eaeH	0.71163		yaeH	0.952026		otsB	0.713848		yehY	0.412969
rbsK	0.358156		hemL	1.55202		yhbS	0.866575		lsrF	0.458142		yncI	0.600378		rpsN	0.779181		arfB	0.193696		rho	0.711197		yfaS_1	0.950874		yhcC	0.711503		yecE	0.412862
recB	0.356197		yneE	1.55038		hypE	0.866249		aaeX	0.457841		hofP	0.598755		plsC	0.776335		hycE	0.192436		yfdY	0.710936		ydeT	0.949929		aroL	0.710844		fixC	0.41171
wecH	0.355245		intG	1.54528		yafW	0.865743		yqgB	0.457755		chpB	0.598375		cysD	0.774671		rsmB	0.192066		yciO	0.710774		ais	0.94819		yaeH	0.710182		yohO	0.409512
tynA	0.354394		rsmI	1.54488		yeaJ(dgcJ)	0.86251		holA	0.457587		serW	0.59798		hipB	0.772286		casB	0.191716		yjcS	0.710555		chbF	0.947553		secF	0.710165		nrdD	0.40888
rapZ	0.354039		nikR	1.54427		xdhD	0.860797		pinH	0.456342		yhjK	0.597079		sdsQ	0.772088		paaI	0.191127		hsdM	0.709362		icdC	0.944815		ypjM_3	0.709989		btuD	0.408186
yccF	0.353098		zitB	1.53643		pcm	0.859966		yoaG	0.455958		yfjI	0.595949		yeeP	0.770882		yigI	0.190986		ykfG	0.708587		ycgX	0.943595		yfiL	0.707788		ydfH	0.406973
ycbV	0.353024		ybaP	1.53344		ydgC	0.857544		maeB	0.454992		yqiH	0.595351		sbcD	0.769759		ybdZ	0.190116		argV	0.708059		caiC	0.941918		yffL	0.707173		mltD	0.405188
rpoZ	0.3525		chpB	1.53012		ycdX	0.856941		eutJ	0.45434		lpxC	0.594482		rho	0.768889		icd	0.189905		yhfU	0.707877		yacC	0.940183		phnL	0.706258		C0664	0.404757
yghA	0.350761		dnaN	1.52694		lafU	0.856827		sapB	0.453842		xapA	0.594435		ymdF	0.76726		ybfH	0.189587		insB-7_2	0.707512		cdh	0.937922		ampE	0.704155		bcsE	0.404452
cueR	0.350655		potF	1.52528		nanA	0.854636		ymgA	0.453614		arpA	0.593662		yicS	0.765793		arrS	0.189193		rydB	0.706213		rem	0.934498		bluR	0.703018		yajC	0.403902
radA	0.349648		garD	1.5231		ytfL	0.850878		ychF	0.453339		yaeH	0.592418		pth	0.76519		aroL	0.189163		yjhI	0.706185		hybF	0.931972		yqeH	0.702418		fadK	0.40298
glnG	0.348444		rplO	1.52113		kdsD	0.849617		ybgE	0.450492		nanR	0.59084		yfcO	0.763734		yaeB	0.188626		grpE	0.705521		sdsQ	0.928868		ygcN	0.702058		panB	0.401653
gsk	0.347447		hycH	1.51597		ykfM	0.845907		ssrA	0.44874		yedS_3	0.588227		yjjZ	0.760963		ydfZ	0.188346		ybdL	0.704973		rseA	0.927095		ycgV	0.699426		yceK	0.401608
helD	0.346568		ryfD	1.51595		lpxB	0.845202		yidX	0.446095		recG	0.587599		proV	0.760065		ybfF	0.187843		ydjH	0.70407		yhfG	0.924223		ydiU	0.69806		ldcC	0.400891
eda	0.346355		thiS	1.51397		yhhH	0.844889		hha	0.444585		nusG	0.586393		ftnB	0.758415		rarA	0.18762		yciW	0.703136		ypjM_2	0.922849		hha	0.697467		waaU	0.400373
rplA	0.34373		ilvD	1.50822		mraZ	0.843933		ygeI	0.443699		rlmB	0.585973		yhcM	0.757196		aaeA	0.187293		sgcQ	0.702962		erpA	0.921969		ycfS	0.695747		cas2	0.399056
yagH	0.342714		yecA	1.5037		yncG	0.839932		sxy	0.44333		yaaU	0.582643		plsB	0.755189		dcuD	0.185859		mnmG	0.702282		pqiB	0.921373		yggS	0.695614		ilvG_2	0.397631
agaB	0.342348		yoaF	1.5036		gltX	0.837957		mutS	0.442321		yffO	0.5794		sibE	0.755062		thiE	0.18491		yddB	0.702262		pspB	0.915356		rsmA	0.695206		trpA	0.396575
rrlH	0.34224		ydhX	1.49561		tar	0.835899		yfaS_2	0.441167		yedK	0.579173		rraB	0.749088		yegH	0.184729		yafE	0.700038		norW	0.915027		lolA	0.694271		yacL	0.395966
glyU	0.341469		yidD	1.49441		mscL	0.833832		yfjU	0.440934		csgG	0.579093		yihY	0.746125		argC	0.184692		efeU_2	0.698838		sgbU	0.909949		accB	0.693054		glcD	0.393878
panZ	0.341246		baeS	1.49407		ychG_2	0.833346		gdhA	0.440381		tdcR	0.577003		ygaM	0.743944		etp	0.184586		C0664	0.698572		xdhC	0.904154		ybdM	0.692498		nudB	0.393486
intG	0.339365		lgt	1.49241		ybhH	0.8333		rbn	0.43972		azoR	0.576505		sdsP	0.74258		yjcC	0.184386		stfR	0.698534		lpxD	0.901613		marB	0.689253		talB	0.393112
ydiY	0.33894		rplY	1.49175		zraR	0.830732		miaA	0.439373		gnsB	0.575293		yhaK	0.742579		yfcP	0.184147		yoeA	0.697953		gapC_1	0.900633		yhcH	0.688865		cydD	0.392928
yzgL	0.338926		wzzB	1.4916		yobB	0.82605		yqcC	0.439142		yciX	0.574174		ygaU	0.742074		yifL	0.183574		cysD	0.697432		yedF	0.900411		murR	0.685507		suhB	0.391791
rcsD	0.338611		dam	1.49118		ymfJ	0.825558		rne	0.438253		gss	0.573565		mokC	0.741392		pflB	0.183244		recE	0.693824		mreD	0.899647		yehR	0.685099		ybeD	0.389914
yedN_2	0.338413		nanS	1.48896		yobD	0.824376		kup	0.437498		hipB	0.572945		nuoA	0.739726		yegL	0.182778		moaC	0.691078		yegX	0.899372		ylcH	0.684193		lpxB	0.389663
yecM	0.338187		ygfT	1.4886		murC	0.821837		yffQ	0.43665		intR	0.572274		pspA	0.738855		mqsR	0.182689		mdtN	0.689683		rlmD	0.899094		ecpD	0.683872		tyrA	0.388364
yddH	0.337028		puuA	1.48554		ythA	0.820598		pspB	0.436175		ychJ	0.571809		yhhM	0.734294		yjiJ	0.182418		pepQ	0.689129		appC	0.898171		yhdH	0.68325		asnC	0.388327
insK	0.336425		modE	1.48391		mraY	0.81887		pspF	0.435641		ihfA	0.571387		sapC	0.733624		fhuE	0.182374		yhcC	0.687274		sieB	0.897742		yeaI	0.681887		ychQ	0.387705
ydgC	0.336276		dksA	1.47753		eamB	0.818708		ppdD	0.435389		eda	0.571279		paaY	0.73309		emrE	0.181923		rlmA	0.685954		yffR	0.896816		fabF	0.680182		narJ	0.387563
flxA	0.335601		tff	1.47119		hybE	0.817995		yfhM	0.433782		ydbH	0.571167		lsrF	0.728418		lsrA	0.181645		yebO	0.685928		yhiL	0.895373		ynfN	0.680015		kefG	0.386828
yahL	0.335385		ychN	1.47013		yqcG	0.817346		nth	0.433352		dinQ	0.570763		yjiQ	0.727774		ypfN	0.18097		cbpA	0.684489		yghE	0.894209		truC	0.680007		spy	0.386488
ycjS	0.334402		fbaB	1.46865		insH-4	0.817102		fdx	0.432414		yciW	0.568869		nepI	0.725552		ydjA	0.18096		ybiU	0.681682		agaB	0.893893		katE	0.679725		betT	0.386221
yibA	0.333442		rpsQ	1.46805		yfcL	0.816793		yeaQ	0.431931		yfdF	0.568658		yijF	0.724236		ydhK	0.180032		oxc	0.679207		ttcA	0.891799		pheU	0.676978		nuoB	0.385277
yfiC	0.332743		bcsZ	1.46619		yjeO	0.816713		apaH	0.431226		yddK	0.568511		C0664	0.724021		pka	0.179512		atpI	0.678743		dosP	0.891636		ycdF	0.676678		inaA	0.383284
gluQ	0.332737		ipeX	1.46567		rdgB	0.816631		ycaR	0.429543		yghQ	0.56738		ymgG	0.723501		pyrI	0.178678		treB	0.678334		fabB	0.886395		gspA	0.675253		accB	0.38215
yjeJ	0.33262		fliO	1.46546		rnr	0.815478		yraP	0.428741		icdC	0.566265		ribC	0.722092		agaI	0.178367		ycfS	0.677521		putP	0.882152		ykgE	0.675007		satP	0.382101
lptF	0.332444		ybbN	1.46343		yjgX_3	0.814114		yfdI	0.428036		thrU	0.56614		yciC	0.71765		nanM	0.178294		sapF	0.677494		ydeM	0.881472		ptsP	0.674529		yejA	0.381581
ppa	0.33229		cysI	1.46286		argE	0.813428		ydeI	0.427375		mraZ	0.563713		pqiA	0.716066		ratA	0.178265		gstB	0.677406		yhhW	0.881019		phnC	0.673338		yaiE	0.381094
trmI	0.330805		ycaD	1.44318		yifB	0.810113		moaB	0.426685		ycaQ	0.563546		yfjS	0.716051		yihI	0.178171		ttdA	0.676979		rpmJ	0.880354		hdeD	0.672791		ykgD	0.381038
ygcR	0.329767		feoA	1.44079		murF	0.803291		menF	0.425884		rpoC	0.563439		grxC	0.714595		potF	0.17794		ghrA	0.675068		leuD	0.877626		yjeF	0.671086		crl	0.380849
sibB	0.329428		malM	1.43996		trmH	0.802172		serX	0.425741		yicC	0.563393		maeB	0.714461		cysQ	0.177332		tnaA	0.673103		zapD	0.877313		epmA	0.670966		dhaK	0.380384
tpr	0.329406		melB	1.43751		yjhH	0.801605		xdhD	0.424537		glmZ	0.561085		ybbP	0.71441		pstC	0.177133		hipB	0.673022		yhiN	0.87621		rrsC	0.669821		rlpA	0.380382
yiaB	0.328796		baeR	1.43523		yegK	0.800676		eptA	0.423792		yhhH	0.560308		yebS	0.708787		ydaY	0.176771		ycbV	0.6719		ftsQ	0.875046		yhfW	0.669483		hyaF	0.379361
ydfD	0.328344		feoB	1.43492		dcp	0.799633		elfD	0.423124		ykgA	0.560199		ibpB	0.707214		ydjO	0.176748		yadL	0.671627		spoT	0.874341		ytfL	0.668059		mhpE	0.378853
yifB	0.328028		tsr	1.43293		narK	0.799357		cysP	0.422349		ymfT	0.559982		glmY	0.706815		ygiA	0.1766		yfiP	0.667657		yihM	0.873807		dpiA	0.665152		rarA	0.378315
lptE	0.326034		lysS	1.42976		dinJ	0.799041		gatA	0.422061		hlpA	0.559898		smpB	0.706651		ypdK	0.176483		ybcD	0.66544		cvrA	0.872769		dacD	0.661713		queE	0.378203
yadS	0.324845		galF	1.42866		ysaA	0.796231		dmsB	0.421743		rpmE	0.556487		lpp	0.706212		rsmF	0.175783		insD-3	0.66476		hybG	0.871785		zwf	0.661635		hycB	0.378165
yfjJ	0.324788		lyxK	1.4286		ssb	0.794487		ycaC	0.419831		chpS	0.551716		hemE	0.704489		yciX	0.175592		rraB	0.664518		argH	0.870331		yeeS	0.661345		cadC	0.377277
ydjH	0.322569		zipA	1.42799		pinH	0.793591		ynfL	0.419785		fxsA	0.551618		argG	0.69742		intQ	0.175541		gcvB	0.662347		rplJ	0.868512		hrpB	0.660576		malM	0.377032
aaeX	0.321406		typA	1.4251		araC	0.793587		hyaC	0.419438		rplJ	0.551514		yfaS_2	0.697008		ykgR	0.175404		ygeW	0.66197		yqiJ	0.866825		mraY	0.660254		aphA	0.376563
frmA	0.321161		hemA	1.42352		rfbC	0.793239		glrR	0.419036		yghG	0.55148		yeaG	0.696834		ybcC	0.175378		yciM	0.661781		yfjI	0.866753		ulaF	0.660228		feaR	0.37626
kefG	0.320807		yedA	1.42325		gntP	0.790333		yajG	0.418943		fumA	0.551407		argR	0.694416		ubiG	0.175085		yebQ	0.655946		yhbQ	0.866345		ydjH	0.660139		eco	0.375727
aroH	0.319739		glnU	1.42275		yffQ	0.787143		rtcR	0.41845		miaA	0.550839		b0105	0.69367		yoaA	0.174943		yccT	0.654064		yehP	0.865247		ydfP	0.65774		secE	0.375619
ydcL	0.318481		gudD	1.40582		insB-7_1	0.783075		yccX	0.417412		ynjI	0.550533		ybgD	0.692623		ddpF	0.174473		yaaX	0.651412		intG	0.863729		nrdI	0.657333		lolB	0.374255
mscL	0.318146		rplU	1.40224		ynaI	0.781058		ftsZ	0.417206		hycB	0.550452		tomB	0.691696		b0100	0.174309		gltD	0.650666		yidA	0.860161		ydbA_1	0.657004		moaA	0.374019
wcaE	0.317172		yqaB	1.39949		yffL	0.777951		argB	0.416331		yjhE	0.549131		intQ	0.689302		ybcM	0.174169		mmuP	0.647277		ybdD	0.859572		pykA	0.656954		yidD	0.372867
lpxB	0.316635		ycgM	1.39946		plsB	0.775923		rsmA	0.415156		argI	0.548019		php	0.685967		cspI	0.174086		ynjH	0.646603		ydcY	0.859556		yjbE	0.656742		nupG	0.372852
argU	0.315825		nanK	1.39791		ynhF	0.77431		cysH	0.414429		fixA	0.547173		hyfD	0.685315		ydjH	0.173763		argG	0.646345		insB-7_2	0.858631		sbcC	0.65655		mdtF	0.371486
tfaS	0.315692		lhgO	1.39196		guaA	0.773941		rapZ	0.414085		yfjX	0.546798		aceK	0.684641		yggP	0.173616		pal	0.645957		cysQ	0.857866		hscA	0.656346		rseB	0.370816
yfaS_1	0.315365		araA	1.39056		yigG	0.772214		yjiL	0.413317		yjdC	0.545196		ybiU	0.682926		yceF	0.173593		ygaX	0.644576		yajD	0.856857		psuG	0.654984		yadE	0.369318
rnhA	0.315106		paoD	1.38713		eptA	0.770306		yncL	0.412898		hchA	0.543057		fldA	0.677153		efeU_2	0.173585		ykiA	0.643666		yjaA	0.855495		ybhC	0.654849		thrC	0.367844
yedZ	0.314185		hyfI	1.38606		ryfD	0.768152		mdfA	0.412476		ulaR	0.54069		eutM	0.676317		adk	0.173244		phnD	0.643292		dgkA	0.854878		ygiC	0.654016		rfaD	0.367288
fepB	0.314127		yfbM	1.38573		ydhL	0.766312		C0664	0.412219		uspD	0.54068		ycfK	0.674366		abgB	0.172901		ispF	0.642619		yhhQ	0.854119		yagI	0.653549		micC	0.366648
ybaV	0.313648		dgt	1.38127		srlA	0.765873		mdtM	0.41176		ydjJ	0.53907		yciT	0.673969		yfdF	0.172871		casB	0.642606		mdtO	0.853968		trpE	0.652521		wcaK	0.366446
yedL	0.313499		tfaE	1.38101		yfjH	0.763231		mdtQ	0.411754		yehE	0.538722		yiiR	0.671137		ulaA	0.172193		slyX	0.64248		mukB	0.853233		yqhG	0.651642		fabZ	0.366286
rydC	0.313235		ubiG	1.37803		yegJ	0.762822		yhcG	0.410613		ybfH	0.538502		nuoJ	0.671019		mdtN	0.172078		ydcX	0.64216		yzgL	0.853071		grpE	0.650984		hyfD	0.364491
rzpQ	0.312959		mrdB	1.37169		cbpM	0.761561		yiaV	0.409897		yeaW	0.538253		glgB	0.66992		yddK	0.171513		ydhY	0.639816		flgE	0.850061		ftsN	0.650782		yncD	0.363188
ydcO	0.31263		gstB	1.36976		frmR	0.761525		lolB	0.409732		ydfR	0.537334		yicC	0.669791		artP	0.171478		zipA	0.638825		ymgG	0.849388		dusC	0.649197		yjjX	0.361908
yccS	0.311667		rnhA	1.36577		ymiA	0.760567		mdtJ	0.408899		yeiW	0.53648		metA	0.668828		ytfB	0.171161		mqo	0.638385		yjeO	0.84452		renD	0.648811		tus	0.361508
ppiD	0.310982		yzfA	1.36499		yegH	0.758487		csgG	0.408535		yhdY	0.536288		fdhD	0.668526		ydjI	0.170637		moaA	0.636783		ynjF	0.843396		yhhH	0.647471		truA	0.3615
ycbZ	0.310356		ygiL	1.36418		hrpA	0.757334		hisG	0.408502		flhE	0.534333		ygaP	0.666632		yfaH	0.170259		ygbA	0.636492		dinQ	0.842417		smg	0.647135		envZ	0.361204
mntP	0.309841		yhjA	1.36302		kefF	0.756704		yhbO	0.40835		symE	0.531705		ygdR	0.666413		ycjS	0.170155		bssR	0.635948		yqeF	0.841627		hicB	0.647003		yfcE	0.360053
alpA	0.309583		ynbE	1.36141		yfjR	0.752823		ryfD	0.408224		yfeA	0.530471		ycaL	0.665893		iraM	0.169976		cca	0.63583		feoA	0.840322		yeaY	0.646901		hemB	0.357531
atoC	0.309407		yceB	1.36038		yjdI	0.752361		fkpB	0.408126		yfdR	0.529617		insB-5	0.665862		ypjJ	0.169708		alaS	0.635637		ilvL	0.840163		yqjK	0.645298		yphD	0.357501
pfkA	0.309303		ugpB	1.35866		insH-3	0.751433		tusA	0.408105		b0100	0.529286		zraP	0.665724		yhcC	0.169214		yedZ	0.635321		yabP	0.836876		minC	0.643003		mmuM	0.35745
nusG	0.308959		murJ	1.35585		yhaM	0.75048		sdaC	0.407955		trpT	0.528878		yihW	0.665639		serU	0.169012		emrB	0.634857		ykgN	0.834996		csrD	0.642045		rrfF	0.356349
rpmC	0.30807		ycjF	1.35127		rimI	0.750428		eda	0.406991		edd	0.528218		rpsH	0.663464		yicH	0.16892		rdlD	0.634088		arsR	0.83352		srlA	0.641481		ybdG	0.354641
cysQ	0.308039		ryjA	1.35043		ais	0.750148		hlyE	0.406642		ybhB	0.526776		thiL	0.663256		yjiT	0.168309		ybbC	0.633976		yegT	0.832335		yhaL	0.641004		yhjV	0.353896
ygdR	0.306164		rplT	1.34952		rlmB	0.749995		xseB	0.406074		ydiH	0.526696		stfR	0.661467		kptA	0.168273		yfhR	0.632952		rcsD	0.832107		rimO	0.640587		sodA	0.35379
yoeE	0.305594		nepI	1.34595		ycjX	0.749759		ytfL	0.404673		sgcX	0.525846		eutB	0.660691		yagJ	0.168224		prfC	0.631026		ybfA	0.831585		ypjB	0.640476		astD	0.352933
yadL	0.305482		pabB	1.34543		csrA	0.74877		speE	0.403541		murC	0.525325		yadI	0.660189		yihQ	0.168213		adiY	0.629466		dbpA	0.829946		ftsP	0.637246		yegE	0.351568
ravA	0.305385		iscA	1.34138		sokE	0.748377		gnd	0.40273		frmA	0.523542		hchA	0.659644		fliT	0.167773		yhdH	0.628477		rfbC	0.828385		insB-5	0.636334		lldD	0.351215
yedI	0.305372		dgoD	1.32827		ydfD	0.747872		pdxA	0.402615		wecH	0.523349		agaA	0.659362		hypE	0.167261		avtA	0.626633		ygiC	0.826581		yciC	0.635745		leuB	0.350792
yabQ	0.305075		amtB	1.32813		ycfH	0.74743		iap	0.402605		ybiS	0.522794		yjdC	0.657903		ypjM_3	0.16712		pstC	0.626243		fimF	0.824081		xylB	0.634053		nikB	0.350786
rplT	0.304659		ldhA	1.32726		yciO	0.746667		hns	0.402605		ipeX	0.522316		glpE	0.656942		yegW	0.1669		yqjE	0.625526		yihR	0.822761		nei	0.63368		acpT	0.350632
cmtA	0.303819		torY	1.32346		glnS	0.744092		yeeY	0.402311		ypdA	0.52094		ssrA	0.656263		yajI	0.166765		recX	0.624954		ycjV	0.822333		yphC	0.63232		bcsB	0.350593
eptA	0.303009		rffD	1.32246		yfeR	0.742548		rarA	0.402054		yiaW	0.519756		yghD	0.654134		hslR	0.166717		tig	0.624303		yddA	0.821056		alaE	0.632148		yfaW	0.350548
yehE	0.302886		sucD	1.32243		poxB	0.739592		speA	0.401861		ymcE	0.519371		solA	0.652811		nohB	0.166381		spoT	0.623106		ydeQ	0.819118		yjaH	0.631605		mglA	0.349657
yaiO	0.302626		ynbB	1.3213		hdeD	0.739038		ydcH	0.401832		oxyS	0.515081		nagC	0.648985		ygaQ_1	0.166239		sroH	0.622801		ygeR	0.818971		yaiU	0.631569		uvrB	0.349119
yqhA	0.302358		hscA	1.31952		ydjI	0.731738		yeeD	0.401038		ybgE	0.512925		yggN	0.6487		gabD	0.165892		yjjY	0.622164		yadC	0.818853		intR	0.631512		casD	0.348785
ilvD	0.302121		dpiB	1.31897		sibE	0.729386		nrdF	0.400971		yqiA	0.512324		ygdQ	0.647763		ycbZ	0.165278		endA	0.620534		ydcA	0.818658		borD	0.631057		yjeH	0.348489
mutS	0.301138		agaC	1.31747		iscX	0.728414		paoB	0.40064		ydeN	0.511982		ydfZ	0.646295		rlmB	0.165219		artP	0.620483		recA	0.817561		yfbN	0.630753		yihV	0.347903
rimL	0.300289		yfgC	1.31354		asnS	0.7281		metI	0.400548		yejO	0.511592		nusG	0.645685		rprA	0.16492		allR	0.619994		ruvC	0.817551		hydN	0.627869		fixB	0.346821
arpA	0.299793		ynhF	1.31136		ydhF	0.72752		arfB	0.400293		elbB	0.510823		yfaA	0.644484		qmcA	0.164592		cycA	0.616841		ygfS	0.817438		rspA	0.62771		rffH	0.346285
zraR	0.29929		ychE	1.31064		yjgH	0.726413		ispE	0.398724		pgpC	0.510661		ydjN	0.643952		yfdY	0.164582		yehD	0.616133		lomR_1	0.816258		intZ	0.626351		gltB	0.346093
aroK	0.298521		queC	1.30996		yaeB	0.725472		araB	0.397297		ycfH	0.509087		ubiB	0.643949		yqiH	0.164523		yciA	0.615518		rluF	0.814267		ydcV	0.626176		rfbX	0.345506
narK	0.298032		ymbA	1.30983		gnsB	0.722045		selC	0.396748		sroG	0.508861		rhlB	0.643914		rimL	0.164405		cysZ	0.615402		glyQ	0.813823		fadH	0.626023		phoU	0.344483
ytfI	0.297337		yiaC	1.30749		ycdY	0.721518		aspV	0.396735		cnu	0.507084		yedZ	0.643007		eutR	0.164139		yqfA	0.614325		yacH	0.813487		tap	0.624426		ydaN	0.343689
fnrS	0.297269		ydeQ	1.30669		ydhY	0.720972		yhbP	0.396575		groL	0.507054		yaiP	0.642794		hisG	0.1635		norR	0.614064		yfjR	0.813254		yfbT	0.623046		wzc	0.343595
aroB	0.297191		yjiY	1.30632		yidR	0.720924		secA	0.396562		yifL	0.506795		mhpD	0.641857		bamA	0.163266		cysB	0.611518		ftsI	0.812161		rbsR	0.621998		aslB	0.342507
yeeW	0.296921		yfhM	1.3045		pheS	0.719815		yahF	0.396449		yihW	0.506041		allB	0.641778		ychQ	0.163142		yqaB	0.610035		narH	0.810423		ldcC	0.621073		uspF	0.341715
npr	0.296112		ptrB	1.3025		ypjM_2	0.719279		acrE	0.396146		tktA	0.50569		pspF	0.641218		ilvH	0.162964		ftsX	0.60978		yejO	0.808001		dapD	0.620469		mreC	0.341187
ftsP	0.295597		selA	1.30058		rrsA	0.718879		ycjD	0.395921		lysS	0.50368		sodA	0.64079		yhaI	0.162762		csiE	0.60956		ygdH	0.807407		ibpA	0.620074		asnA	0.341055
nrdF	0.295228		rhtB	1.29872		ygeF	0.71819		aes	0.395785		yciA	0.502991		ybiJ	0.639732		gspA	0.162428		mrdB	0.608797		folP	0.806834		ccmH	0.619966		nikA	0.340296
ves	0.29484		inaA	1.29744		yicL	0.717326		cyaY	0.3948		tpke11	0.502133		yecE	0.638937		sohB	0.162395		rayT	0.608314		proK	0.806726		insL-3	0.619919		slp	0.339516
yjeN	0.294715		ssuE	1.29637		yjfI	0.716921		ybfB	0.394779		ygeP	0.501701		tsgA	0.638085		ygfB	0.162355		ibpB	0.607157		yidF	0.805671		yniB	0.6189		garP	0.339307
yhbE	0.294709		ecnB	1.29378		yfdC	0.7157		yqgC	0.394708		pphA	0.501363		fur	0.637359		dmlR	0.16169		lrp	0.60662		ygaQ_1	0.804384		polB	0.618254		recB	0.339264
ykfK	0.294124		greA	1.29072		rsmA	0.71476		ybfO	0.39465		fimB	0.500655		queD	0.636836		yafN	0.160646		hmp	0.606011		cspA	0.804213		ydfA	0.618235		yiiF	0.338889
hflC	0.293923		chbC	1.29027		araA	0.713222		hypE	0.394491		rplN	0.500348		fhuA	0.631053		fucU	0.160401		pheS	0.605356		glpC	0.803596		rhlE	0.61696		yiaT	0.337646
b1364	0.293205		fdhD	1.28932		nikR	0.708966		nlpD	0.392915		ecpE	0.499423		yhbV	0.627236		rfbX	0.159363		yrhB	0.60461		yiaW	0.802875		yagJ	0.61617		tap	0.336562
glgP	0.29308		yqhD	1.28745		sucA	0.708218		yfeA	0.39239		yjcB	0.498661		slmA	0.627202		yhaL	0.158927		psiF	0.604249		bluF	0.802555		recN	0.615788		frwC	0.336336
ydcH	0.292946		mdh	1.28589		tdcB	0.705018		csrB	0.392116		ilvL	0.497628		clpA	0.626592		yahB	0.158863		minE	0.604002		yecF	0.801504		tfaD	0.615179		yiaK	0.33626
alsC	0.292604		btuD	1.28346		rimK	0.704798		otsA	0.391725		pstB	0.497287		moaD	0.626399		galF	0.158591		yddM	0.603933		rluD	0.800433		idnK	0.61508		hyaA	0.336166
csrD	0.291653		ymfH	1.28302		hlyE	0.702039		fdoH	0.390686		ychH	0.497059		hemA	0.625078		cheZ	0.158456		valW	0.603579		ybcC	0.799381		paaY	0.614534		lolA	0.335576
trpE	0.290791		frlC	1.28127		argV	0.699996		ydiH	0.389686		yafQ	0.496665		pstS	0.623676		aroA	0.158443		prc	0.602727		hcaD	0.797128		yafD	0.612892		yegV	0.335462
ygeP	0.289452		mntR	1.27804		rmf	0.69665		malZ	0.388924		yjeO	0.496533		soxS	0.623067		ygjR	0.158386		hypB	0.602223		yeeT	0.795751		puuC	0.612666		tusD	0.335107
yhjC	0.289374		ypjM_2	1.27765		ybjX	0.694653		osmE	0.388476		yqgE	0.496089		zraR	0.621095		yeaQ	0.158045		yceF	0.602		yggP	0.79528		yihG	0.610961		appC	0.334786
prmB	0.289081		rnd	1.27462		glyS	0.694479		yiaK	0.387717		yhdH	0.496058		tpke70	0.619301		ybaM	0.157981		rlmN	0.600242		serX	0.792246		flxA	0.610594		pldA	0.334726
yjdA	0.288134		ddpA	1.27185		pncC	0.694102		hpf	0.387349		ybbB	0.494958		rpsQ	0.619197		b0105	0.157964		insB-7_1	0.599694		fryA	0.787753		argA	0.610541		zapB	0.334232
hyaD	0.287911		gspJ	1.2706		intF	0.693761		yeeT	0.386425		rpmC	0.494551		ygaH	0.616818		ydcC	0.157827		ypdK	0.599648		essQ	0.78424		gapC_1	0.610392		ycaD	0.334133
ydhU	0.287349		ycfH	1.27043		slyX	0.692992		cybC	0.384917		ycaR	0.494057		dld	0.616172		hokA	0.157603		yeaL	0.599534		ygcQ	0.784083		yniA	0.609521		yhfW	0.334002
yaaY	0.286589		napD	1.26986		tam	0.691873		entS	0.382662		fabZ	0.491471		rplE	0.6158		yjhC	0.157529		yqjK	0.597827		yqcG	0.783877		yahI	0.608263		waaG	0.333136
entD	0.286044		mscS	1.2694		dnaB	0.691182		ycgG	0.382576		nusA	0.491343		ydcK	0.615717		lptF	0.157242		ylcH	0.593955		ung	0.78277		bamE	0.608021		recG	0.331985
paaG	0.285411		sucB	1.26651		yhhW	0.690787		ygcN	0.382291		dmsB	0.491024		tadA	0.615367		elaA	0.156953		efp	0.59369		yjgX_1	0.782088		csgA	0.60741		flgG	0.331797
C0067	0.28454		yjcO	1.26647		recA	0.690208		mltF	0.380103		mutM	0.490214		pal	0.614694		ybcD	0.156878		pdxA	0.591967		rspB	0.781042		ibpB	0.606614		yibJ	0.331753
acrR	0.284353		yadV	1.26641		ybiI	0.689889		xerD	0.380015		yicL	0.487958		yiiE	0.61397		yfdS	0.155708		yecM	0.591413		btuB	0.780421		yedL	0.605438		tsaC	0.331675
yibV	0.284348		holC	1.26526		pka	0.688165		yniB	0.379824		mdtG	0.487661		ydcY	0.613868		yeiP	0.155555		cbrA	0.590911		ykgL	0.779511		yegZ	0.605269		thiM	0.331515
rnr	0.284337		panB	1.265		yeaG	0.687199		tauC	0.379803		yheT	0.487647		araB	0.61255		yiiE	0.155422		nadC	0.590062		lar	0.779416		radA	0.604951		ulaF	0.33059
cusF	0.284284		iscS	1.26301		yghS	0.686759		yebE	0.378571		dcyD	0.487577		htpG	0.610932		ymdA	0.155378		ypjF	0.585794		tyrS	0.77877		yfiE	0.603431		cusA	0.330421
ydfU	0.284084		ydhR	1.26292		IS129	0.685428		rsmC	0.378313		rimM	0.487396		pagP	0.610819		gshB	0.155261		agaA	0.58547		mqsA	0.778629		chiA	0.603357		phnO	0.330324
dctR	0.28341		yiaV	1.26021		puuR	0.683758		serT	0.377058		fabI	0.486516		nrdH	0.610427		rfbD	0.155039		gnsB	0.58535		priB	0.778229		ybcM	0.60298		citX	0.330317
hyfJ	0.28325		ykgD	1.26006		sokB	0.681697		uspD	0.376878		yohP	0.486324		ytfJ	0.608758		mdtF	0.154387		arpB_1	0.584285		iaaA	0.777853		yedF	0.602547		speF	0.330032
gmk	0.283185		yraP	1.25847		serS	0.679773		yffN	0.375916		hsdM	0.485976		ydcJ	0.608257		tig	0.15363		purT	0.583799		topA	0.773909		uraA	0.601466		lsrR	0.329979
gfcB	0.281634		sufA	1.25839		yggS	0.679717		lpxK	0.375502		frvX	0.485514		ybiX	0.607493		eaeH	0.153525		yfaS_1	0.583502		ykgI	0.772149		ydfR	0.600803		srlA	0.329337
C0293	0.28137		wbbK	1.25696		yaaI	0.67926		yigZ	0.375195		cmtA	0.485332		ygfT	0.607455		aslB	0.153458		ydfZ	0.583393		lit	0.77213		yhcA	0.599971		maeA	0.328907
yagN	0.280818		yfbO	1.25679		yqjC	0.67882		tisB	0.375011		hha	0.485145		citX	0.605929		rsxE	0.153447		ygiA	0.58318		ribF	0.770285		ycbV	0.599126		gatR_1	0.32861
yjdJ	0.280676		sspA	1.25649		ulaE	0.675975		yjiX	0.374974		cueR	0.485078		yidQ	0.6059		rapZ	0.153272		ydiJ	0.582898		ileY	0.767969		yifN	0.598818		ybeF	0.327363
ybjN	0.280366		pka	1.25571		ydcP	0.674934		gltD	0.374743		yidR	0.484891		yfjZ	0.605735		ycbB	0.153259		uvrY	0.582557		ydhK	0.76509		sbcD	0.597766		emrE	0.327312
yigI	0.279238		yfbT	1.25464		thrS	0.67429		ycgX	0.374348		pcm	0.484491		bsmA	0.60522		ydeQ	0.153102		mepM	0.5824		yfcV	0.764281		yjgX_1	0.596351		yiiR	0.326344
citD	0.279079		nusA	1.25132		tcdA	0.674215		trkA	0.374268		yagM	0.482636		ybeL	0.605204		yehL	0.152995		tomB	0.582327		srmB	0.762979		elfA	0.596229		ecpB	0.32604
fucA	0.278787		yjgR	1.25098		helD	0.672823		htpG	0.373862		lyxK	0.481784		ynjA	0.604425		aldB	0.152905		yjdK	0.582013		ylbG	0.762474		msrB	0.596156		aroE	0.326014
b0725	0.27876		oxc	1.25006		phnK	0.672485		yjhW	0.373548		soxS	0.481463		nac	0.603749		smf	0.152902		corA	0.580649		ydhX	0.762135		envC	0.595643		kdgK	0.325946
fumA	0.278536		sfmH	1.24317		atpA	0.67153		metG	0.372832		yfdL	0.48048		ymbA	0.602519		alkB	0.15268		fecB	0.580376		yniA	0.76054		yfjW	0.595576		waaA	0.325727
hypT	0.278307		ygdT	1.24059		yaaW	0.67101		znuB	0.372449		yedP	0.480303		trkH	0.601991		yiaB	0.152573		rlmJ	0.579665		rpsG	0.759509		yciE	0.595542		flgK	0.32359
ygaV	0.278002		uraA	1.23981		alaS	0.670009		trmD	0.372308		rcbA	0.480113		nudK	0.600536		hsdS	0.152432		exoX	0.579269		prfC	0.758255		fryB	0.594848		yqcC	0.322687
glpB	0.277132		ppiD	1.23973		rseX	0.667078		rplL	0.372307		amn	0.480075		citE	0.599547		ybgQ	0.152345		ygcW	0.578631		lolC	0.757401		ispG	0.59463		livH	0.322618
hflX	0.277035		yiiF	1.23752		ydgD	0.666206		truA	0.372129		ygfI	0.480023		appA	0.599308		djlB	0.151953		yhaK	0.577767		dnaB	0.756829		arrS	0.593494		wcaI	0.322446
yjjV	0.27692		ypjJ	1.23697		yihF	0.665758		yhfA	0.371743		sgcQ	0.479652		recA	0.598952		dinJ	0.1517		yjhE	0.577709		waaL	0.756693		yegR	0.591905		yeaV	0.322224
yedS_2	0.276506		ycbC	1.23541		ypdJ	0.665748		nuoG	0.371507		arrS	0.479289		slyA	0.597596		dinB	0.151677		deoC	0.577179		ybfQ	0.756641		ycfD	0.59186		apbE	0.321777
yjaH	0.276466		glnD	1.23381		gatD	0.66441		aldB	0.36983		yfdX	0.479272		agaV	0.597052		yqhA	0.151401		htpX	0.576054		cspF	0.755392		sokB	0.590985		dpiA	0.321746
glcA	0.276404		ycgX	1.23078		tdcR	0.663638		IS128	0.369784		ykfB	0.478618		rplR	0.59672		spy3'	0.151316		leuD	0.575654		glvB	0.754132		lpp	0.590639		galS	0.321607
ygcN	0.276123		era	1.22922		mnmA	0.66342		gshA	0.369685		yagE	0.478028		arsC	0.596623		yqjE	0.150935		arfB	0.575432		pinH	0.75348		wbbL_1	0.590404		grxA	0.319819
bioD	0.276093		livF	1.22911		insG	0.663211		yajI	0.369615		dkgA	0.477457		crp	0.59622		yfcD	0.150829		yhgA	0.57512		yihF	0.751846		yfdH	0.590038		flgM	0.319116
ynfM	0.275552		narP	1.22848		afuB	0.662149		apaG	0.36901		puuR	0.474917		ygfF	0.596154		ybgE	0.150751		malI	0.574895		ybfO	0.751586		pspF	0.58908		cheR	0.318917
ychH	0.275483		cadA	1.2278		uspD	0.662102		trmA	0.368875		ygcU	0.474662		trpA	0.596079		yqgA	0.15061		dmsD	0.574895		mglA	0.751542		emrY	0.588044		purK	0.318905
galM	0.27543		aroK	1.22255		yciE	0.660943		sibA	0.368633		yphA	0.474286		hypC	0.595563		wzb	0.150548		serB	0.574686		fabF	0.75023		yshB	0.587784		mukB	0.317782
dsrA	0.27541		secF	1.22135		ydhW	0.660386		yceF	0.368109		sgcA	0.474229		cyaY	0.595436		ybiA	0.150391		yaaA	0.574122		torS	0.749571		yhaJ	0.586925		yrbL	0.317325
yihR	0.275162		ydjX	1.21824		yfjI	0.658365		ymbA	0.368019		ybcV	0.473385		yaiA	0.591953		yafT	0.15035		malK	0.572822		yfhR	0.748421		yjgX_2	0.586678		bioF	0.31585
ygaQ_2	0.27513		recE	1.21477		yjaH	0.65797		yaiX	0.367854		dctR	0.472869		mepM	0.591555		dacA	0.150315		proV	0.57122		yhbX	0.748049		mrp	0.584943		chbA	0.315826
ygfI	0.275109		ykfK	1.21415		yfdF	0.656884		rcsD	0.366957		dsrA	0.47226		yraK	0.591543		ycdY	0.150264		slmA	0.570943		rraA	0.746216		ybbD	0.584896		fliO	0.315821
gnsA	0.27498		ygiM	1.21323		yfjW	0.656399		queD	0.366937		rsxD	0.472014		cybB	0.591451		yeaC	0.150201		mepS	0.570572		suhB	0.745248		nadC	0.583832		recO	0.315664
rrlC	0.273327		pspG	1.21227		wbbL_2	0.655954		gntU	0.366055		ninE	0.471509		sgcQ	0.590163		fliZ	0.150076		ybhS	0.570268		hydN	0.743593		hypE	0.583431		nrfF	0.315448
trmH	0.272661		luxS	1.20313		yjcH	0.655309		sapD	0.364743		ydhI	0.471368		ygbA	0.589647		rcnR	0.149988		yaiT	0.569208		yghB	0.743202		yfaY	0.582812		citD	0.313388
elaD	0.272647		yqiH	1.19866		yddW	0.65526		yqiH	0.36447		ratA	0.470562		sroC	0.589642		yncH	0.149971		arfA	0.569032		alkA	0.738971		micL	0.582093		ynfK	0.312529
smrB	0.272647		lpoA	1.19784		essQ	0.65514		gltX	0.363817		greB	0.47043		ttdA	0.58941		nadD	0.149959		ompG	0.567307		ysdC	0.73757		csrC	0.581784		frlC	0.312359
zur	0.272205		ybhN	1.19753		sucD	0.654639		cfa	0.363578		waaH	0.47011		flk	0.588995		intA	0.149618		ispE	0.566778		rsxC	0.735096		ypdI	0.581641		rcsF	0.312057
yqfG	0.27208		b0725	1.19639		lptF	0.652133		yahL	0.363247		elfC	0.469516		insH-11	0.588691		dsbC	0.14951		ybeL	0.56674		lolA	0.734819		ybiI	0.581383		yejG	0.311733
apbE	0.2716		fxsA	1.19639		C0067	0.651628		ynjD	0.362988		dosP	0.469441		nadC	0.588346		yidH	0.148702		ybeM_1	0.565799		ftsK	0.733152		rpoE	0.581076		ytfB	0.311362
bluF	0.271399		tsaC	1.19169		yhhX	0.650501		yqaB	0.361601		pdxB	0.46909		yfcQ	0.588189		bglG	0.14838		glnB	0.564685		nudK	0.733122		ydaV	0.580417		dgkA	0.310387
yafP	0.271376		ypdI	1.1905		ymfS	0.649767		C0299	0.361541		rimO	0.468971		hycG	0.588166		tsaB	0.148325		pncB	0.564252		secB	0.731939		lysW	0.579732		srlD	0.309173
symE	0.270326		xanP	1.18644		fliF	0.647471		wcaA	0.361362		yieF	0.468556		yciS	0.588027		yqgF	0.148		osmF	0.564198		ydgJ	0.731199		spy3'	0.579577		glvB	0.307879
tfaX	0.270179		ychH	1.17962		yaiS	0.646591		yhjC	0.36107		ycbF	0.468425		appC	0.587264		ycfJ	0.147981		galK	0.563286		bglJ	0.730127		ubiI	0.579433		sohB	0.307503
argA	0.269905		oxyS	1.17841		yajI	0.646181		rlmM	0.360186		yzgL	0.468261		yehI	0.584771		potB	0.14739		trmA	0.562982		kdpD	0.727318		modE	0.579367		yhiM	0.307277
yjfP	0.269787		mdoG	1.17746		yajG	0.645954		ybjE	0.359472		dpiA	0.46773		ydjJ	0.583862		sapC	0.146978		yicL	0.562636		marR	0.725798		mhpE	0.579049		ybgC	0.307121
hofP	0.269442		sucA	1.17538		hisR	0.645339		ythA	0.358629		lysW	0.467512		yhcN	0.583732		potD	0.146557		ymfP	0.562562		waaA	0.725188		gadB	0.578509		fucP	0.305817
sokX	0.269144		scpB	1.17267		rraA	0.644239		hisP	0.35841		xapB	0.466469		sapF	0.583185		yccF	0.146505		ybjP	0.561773		gpp	0.72504		ynjB	0.577936		moeB	0.305688
yaeF	0.268752		tusA	1.17177		ugpQ	0.64375		C0067	0.357889		yobB	0.465575		ybaO	0.582893		yjgZ	0.146467		flu	0.561511		truD	0.723614		rimP	0.57778		dfp	0.30462
yncE	0.268626		ybfP	1.17168		yjhQ	0.643691		bfd	0.357451		ppk	0.463888		yfeY	0.582602		yecM	0.14591		yggX	0.561482		b0725	0.723342		dppA	0.577565		csgE	0.30448
yidJ	0.268532		holB	1.16962		smrB	0.641561		yshB	0.35737		ydfX	0.463861		ysaB	0.581822		kdsB	0.145827		sapB	0.560964		yhhH	0.722917		fadR	0.577529		xylH	0.303836
yifL	0.268278		ydfZ	1.16801		paaE	0.640696		sroH	0.356916		mcrC	0.463419		selA	0.581649		aroH	0.145763		yggN	0.560277		ymfM	0.722889		sgcB	0.57654		csgA	0.303808
proK	0.268126		hcaF	1.16659		yjjX	0.639905		creB	0.356757		yoeE	0.463387		yobF	0.579488		hdeB	0.145598		ylbF	0.559421		guaC	0.722233		recQ	0.575913		sufA	0.303064
yghQ	0.26799		pepB	1.16418		rapZ	0.639755		ccmC	0.356442		ykgL	0.46313		ygaX	0.578541		arcA	0.14559		napF	0.558386		potF	0.720676		flhE	0.574954		yghO	0.301948
azoR	0.267654		rssA	1.16291		marC	0.636743		mutL	0.356399		rpsA	0.462893		eutG	0.577899		yhhJ	0.145443		yhhY	0.558002		yqjK	0.71953		lolC	0.574863		csgG	0.301737
leuA	0.267532		atpI	1.16193		mepM	0.636326		plsB	0.355852		C0719	0.462454		priC	0.577597		ydfX	0.14514		dusA	0.557565		yrhD	0.719475		gltJ	0.574616		lptB	0.300778
yejH	0.26568		yfeO	1.1577		yihN	0.635211		yafW	0.355783		yebG	0.462063		fepB	0.576203		ptsN	0.145103		yffL	0.557405		mrr	0.71793		yehP	0.574447		yibN	0.300302
agaC	0.264438		frvR	1.15599		yfaX	0.634655		accB	0.355652		betT	0.46175		fabA	0.575314		selD	0.145031		gatC	0.55699		prfH	0.717055		adiA	0.573327		nusA	0.300156
casE	0.264366		acpT	1.15572		metA	0.633734		mhpD	0.355452		yagF	0.460658		ynjF	0.574076		ygeH	0.14467		ycgX	0.556607		scpB	0.716906		agaV	0.572848		mlaC	0.299373
yajD	0.264286		yahJ	1.15254		nrfD	0.633445		C0293	0.355218		ymfJ	0.460226		ycbV	0.572974		nrdF	0.144259		hflC	0.556489		tp2	0.715346		yzgL	0.572277		b3254	0.298557
yfjL	0.263697		csiE	1.1524		yhiJ	0.633354		rplJ	0.355194		ynfH	0.45928		insF-4	0.57284		fdnG	0.144097		ygaU	0.556376		tpiA	0.713647		ydjE	0.571758		sufC	0.298352
rseP	0.263462		ymgJ	1.15159		yjcB	0.631602		gabD	0.355181		sugE	0.458216		yeiP	0.572814		yciW	0.144042		dxs	0.554372		waaI	0.71297		ydeT	0.571543		yohJ	0.298322
pck	0.263064		puuR	1.15142		yneK	0.631366		trpE	0.354786		yaeB	0.457432		sapD	0.571965		ynbA	0.143388		metL	0.55434		rsmE	0.712803		serT	0.571435		torY	0.297828
aldB	0.26296		aphA	1.14961		fepE	0.630253		yohF	0.354104		rpsJ	0.456708		yffB	0.571764		phnO	0.143373		rsxE	0.553855		azoR	0.710994		ytfB	0.567987		yccA	0.297367
ssrA	0.262751		rffT	1.14946		asr	0.628814		yehR	0.354033		nfrA	0.456649		hisP	0.570246		ygdR	0.143316		yieF	0.553654		agaI	0.710732		wcaF	0.567707		flgH	0.29722
pyrH	0.262239		nudI	1.14755		yncK_1	0.628171		agaC	0.354007		fbaA	0.45527		yfdL	0.569745		yebG	0.143111		bglA	0.553205		ycaP	0.709816		mnmE	0.567275		ubiD	0.297172
ynjI	0.262078		adhE	1.14694		yfdH	0.627984		umuD	0.3538		dgoK	0.455267		gspG	0.568367		ffh	0.142956		mgtL	0.552926		mdoD	0.709781		gatZ	0.567046		yfaU	0.29666
yjfJ	0.261921		hybG	1.14682		dnaG	0.626518		cysQ	0.352891		ygeK	0.455237		yfgC	0.567062		yjdN	0.142904		ung	0.552865		lplT	0.708768		serX	0.56662		atoS	0.296416
lysR	0.261717		yeiR	1.14368		yheT	0.6258		sibB	0.352485		yqjC	0.455146		ydeR	0.566928		yeeY	0.14286		tusA	0.552439		ygaU	0.708687		rtcR	0.56643		yfhM	0.296224
ybjO	0.261697		nudJ	1.14211		fabB	0.625484		tatB	0.352386		yifO	0.455117		hokE	0.565037		xisE	0.142375		elfD	0.552007		fkpA	0.707962		sdsQ	0.565686		recE	0.296089
kbl	0.26146		gntK	1.14168		atoD	0.623383		satP	0.352337		yaeF	0.454529		xapB	0.565025		ynfO	0.142361		ibaG	0.550412		ycjN	0.707274		fau	0.56501		hisI	0.29488
gspF	0.261091		asnC	1.14143		emrE	0.623254		rzpD	0.351976		yfeY	0.454061		cadC	0.564427		glgB	0.14232		citD	0.550271		citC	0.70519		yfgO	0.564514		nrfB	0.29431
glpC	0.261067		murI	1.14054		mmuM	0.623204		livJ	0.351796		yggX	0.452785		frr	0.564038		chpB	0.1423		yqiI	0.549971		btuR	0.704795		yqgF	0.563692		yfeR	0.293227
argI	0.261011		fabH	1.1389		yddH	0.622851		iscS	0.351263		sra	0.451414		ligB	0.563313		rluC	0.142171		rstA	0.54862		waaH	0.704677		pyrD	0.563013		glgB	0.293142
yqcG	0.260995		ytfL	1.1375		borD	0.622619		cvrA	0.351255		yafT	0.450656		waaA	0.56331		bioD	0.142077		ydiP	0.548185		yigF	0.704638		ccmD	0.561646		rplD	0.291933
yfcA	0.260817		ybhG	1.13571		yqiK	0.62241		yhdJ	0.351048		yiiE	0.449001		lolC	0.563016		yoaG	0.141986		yecD	0.548033		insD-3	0.703328		narG	0.559393		yiaY	0.291428
ulaE	0.260337		hyfB	1.1329		prfA	0.619762		leuV	0.351046		ccmA	0.44856		ytfK	0.56212		tatC	0.141811		pphB	0.547144		truB	0.702513		yejF	0.557528		bioB	0.29126
uraA	0.260264		nrfC	1.12709		ychS	0.619684		yjbS	0.351015		pstA	0.448369		eutD	0.560452		garD	0.141752		amiD	0.547021		yedQ	0.702122		narP	0.55743		yccS	0.290818
yeeN	0.260227		yheO	1.12442		yihG	0.619552		ydfP	0.350775		rrsA	0.447962		rnpB	0.560128		yohD	0.141688		pmrR	0.546338		ypjA	0.701579		citT	0.556752		ftsH	0.290101
mdtK	0.260168		yqfB	1.12287		waaL	0.618591		dgoD	0.349918		borD	0.447958		ugpQ	0.559355		csrD	0.141505		yidH	0.54594		yfdH	0.699246		sufE	0.556578		ygeX	0.289489
moaB	0.260149		ymdF	1.12183		ileS	0.617277		recX	0.349184		tauC	0.44785		copA	0.558903		yqjC	0.141262		pgrR	0.545558		ygeM	0.69849		xseB	0.556538		yfhH	0.289254
lipB	0.259154		rstB	1.12163		ydjX	0.617022		hyfC	0.349137		mmuM	0.446467		mutS	0.55787		glxK	0.140994		yagE	0.544532		yqeJ	0.694929		yhbX	0.556356		ybiO	0.289157
IS128	0.258957		ydfV	1.11991		purP	0.616487		yihI	0.34913		accB	0.446114		artP	0.557744		dsdA	0.140811		rrsC	0.543655		sspA	0.694581		yffQ	0.555681		menE	0.289149
artJ	0.258897		yphE	1.11827		dsrA	0.616433		sgcQ	0.349091		frdB	0.445366		pphA	0.55688		idnK	0.140629		yahE	0.542883		csiE	0.694391		hflX	0.555461		yidB	0.288868
ydjL	0.25835		nlpD	1.11478		yhfU	0.615364		yhaI	0.348884		yhdN	0.445126		aas	0.55639		potC	0.140615		racC	0.542498		yciM	0.694035		insK	0.555008		entD	0.288283
ymjB	0.258168		yceF	1.11449		yeiH	0.61399		mepH	0.348019		dgkA	0.444903		sucA	0.555534		yhgA	0.140436		mutL	0.541828		ispA	0.692824		mqsA	0.553877		adiC	0.2878
yneH	0.257958		xylR	1.11367		ydhS	0.613695		ccmG	0.347877		fdhF	0.444878		chiP	0.554728		yeiS	0.139492		lamB	0.54112		yebS	0.6919		sanA	0.553473		flgJ	0.28671
dpiA	0.257476		yafT	1.11194		gluQ	0.613447		arnB	0.347692		yhhN	0.444269		yqgE	0.554149		ycjR	0.139286		sdsQ	0.540484		mug	0.690806		metH	0.552176		gatA	0.286581
flhE	0.256459		pstA	1.11146		ydfB	0.613244		ytjA	0.347215		yjgW	0.443302		yjiX	0.554095		ybeD	0.138891		yqeA	0.539936		yjfY	0.690633		pliG	0.552004		waaI	0.286544
mrdB	0.256405		kdgR	1.10919		degS	0.612798		yagA	0.346387		yadH	0.443273		ybdZ	0.553449		edd	0.138787		yagA	0.539098		dgcZ	0.690118		slp	0.551951		glpC	0.286469
yfjU	0.256163		mnmG	1.10795		ymgD	0.612014		fliD	0.344189		yjiK	0.442566		hisH	0.552194		gspF	0.138754		hcr	0.53859		yjcD	0.689267		flgB	0.551881		fnr	0.285395
ycgL	0.256097		metN	1.10727		yiaM	0.610107		yhiD	0.344147		yqiJ	0.442464		yfeD	0.551395		waaS	0.138607		cvpA	0.537552		yjjN	0.689209		yqeF	0.551391		yhjB	0.285261
sgcX	0.255976		ptrA	1.10121		ydiU	0.609185		efeB	0.343127		yaaW	0.441704		cyoB	0.55102		ybdF	0.138362		alaA	0.536541		yejG	0.688785		gntK	0.550331		ispH	0.285234
metG	0.25488		gatD	1.09673		insI-3	0.60821		rrsC	0.34296		spoT	0.440967		sanA	0.550952		sufC	0.138254		yicH	0.536042		cysT	0.686819		ynfL	0.549524		arsB	0.284984
dinJ	0.25485		ygdH	1.09569		mqsR	0.607029		cadC	0.342884		rnlA	0.440248		ninE	0.550694		grpE	0.138185		yghT	0.536029		intR	0.686086		uhpB	0.548404		ldrC	0.28473
hypE	0.254344		yhhT	1.0955		ydiQ	0.606846		tusB	0.342148		yedN_1	0.43984		ymjA	0.550045		livG	0.13818		ysdC	0.535678		yhbO	0.685851		rsmF	0.547473		uvrC	0.284469
rna	0.254031		gmhB	1.09533		hemA	0.60676		frc	0.341021		flxA	0.439524		fryA	0.549742		yfjP	0.138054		ucpA	0.533636		ynjB	0.684623		fecB	0.547452		tolC	0.284145
insH-3	0.253827		bcsE	1.09452		gltW	0.606613		ftsP	0.340883		yahF	0.439203		pitA	0.549509		yjdL	0.138052		rspA	0.532435		pagB	0.683066		yfcZ	0.547449		add	0.284026
asnW	0.253693		fadM	1.09165		degP	0.605988		ynbC	0.340845		cheW	0.439169		mntH	0.549463		stfR	0.13772		yehM	0.532254		ygdI	0.682063		yhdZ	0.547192		waaP	0.283887
yaiV	0.253412		hokB	1.08695		ydcL	0.604145		yfbT	0.340813		ssrA	0.43904		cbrA	0.549277		ydiP	0.137702		sseA	0.532194		ygfI	0.681981		glpA	0.547016		thiQ	0.283684
dcuA	0.253115		ytfT	1.08457		birA	0.603885		ybaM	0.340504		yfdM	0.438706		ppsR	0.547848		yaiP	0.137646		b0105	0.530765		ybiV	0.681967		holD	0.546863		pgpB	0.283541
yaeR	0.252967		yfaT	1.08352		ybdR	0.603332		rplC	0.339416		dppC	0.438414		yoaE	0.54688		ninE	0.137508		ygcE	0.530524		ybeX	0.681651		csgD	0.546105		cpsG	0.283267
ydgJ	0.252699		nrfE	1.08312		ratA	0.603312		yagP	0.339393		epmC	0.438072		umuC	0.542198		ybaO	0.1375		ybdK	0.529987		yicO	0.680377		pmrD	0.544999		ydjN	0.283108
yjdI	0.25147		cueR	1.08014		yedD	0.60217		trkG	0.337764		ynaK	0.437774		yggX	0.541849		ais	0.137305		yzfA	0.529785		phnE_2	0.679425		rhtC	0.544207		cobU	0.282906
sgcQ	0.251466		lacI	1.07888		pgaA	0.601337		hdeB	0.336967		mdtQ	0.437332		ogt	0.538848		ftnB	0.137261		ftsQ	0.529019		sbmC	0.677966		ymgD	0.543703		fimF	0.282528
argS	0.25096		ydeE	1.07725		epmB	0.598321		yfcT	0.336757		lptB	0.437163		yddM	0.538812		hybC	0.137186		yfjR	0.528948		rlmH	0.677186		nhoA	0.543649		yrbG	0.282412
yadK	0.250436		yfaL	1.07635		ecpR	0.597797		yjjI	0.336531		php	0.437133		dxs	0.538621		yncD	0.136959		yhaM	0.528665		rhsC	0.675734		bglJ	0.542554		yjhQ	0.281388
yjiA	0.249423		motB	1.07456		yciV	0.595828		yeeJ	0.33633		curA	0.437005		ppa	0.538615		asr	0.136683		yfcP	0.528065		yifO	0.67572		yhdW	0.542004		yjbB	0.281158
yfcU	0.249131		ytfP	1.07418		fliM	0.595798		ydiO	0.336178		yafK	0.436333		ymfA	0.53844		mdtG	0.136569		ybjM	0.526732		ychE_1	0.67563		yifK	0.540896		tsr	0.280619
mdtQ	0.248917		idnR	1.07236		yggC	0.595653		leuS	0.336023		pgpB	0.435761		yafC	0.538431		yhfK	0.13644		artM	0.52668		yqgC	0.674611		yedD	0.540312		yniC	0.280504
mhpB	0.24877		accD	1.07133		malP	0.595076		cra	0.335228		yjaB	0.435446		udk	0.538311		cobS	0.135586		cptB	0.525367		hslU	0.674362		yheO	0.539533		ybbY	0.280359
hinT	0.248764		dsrB	1.06965		yibG	0.59472		bglB	0.334915		nfi	0.43535		yeaX	0.538262		ppk	0.135494		sodC	0.525334		stpA	0.673414		sroD	0.538185		metI	0.278808
rhoL	0.248455		lplT	1.06958		mltB	0.59421		ypdE	0.334376		yoaF	0.435333		ydjH	0.536746		casA	0.135325		sodB	0.525144		dnaT	0.672272		lomR_1	0.538043		gadB	0.278407
yadH	0.248361		yidK	1.0642		yfbR	0.593452		bssS	0.334337		ybbC	0.43431		ffh	0.536649		yqgE	0.135245		yibQ	0.524887		speD	0.6718		fiu	0.537589		micF	0.278347
ariR	0.248125		hycA	1.06374		ydeN	0.593401		paaI	0.333899		ykiB	0.434181		metI	0.536182		psuK	0.135065		yebY	0.524409		sroD	0.671571		fldB	0.537473		exuT	0.278289
ymgF	0.247592		fecE	1.06034		rfe	0.592575		yffM	0.333548		treF	0.43359		ygfS	0.535251		cadC	0.134557		phnF	0.524056		hemG	0.671526		livG	0.535158		mobB	0.277812
fabZ	0.247482		murD	1.05691		pmbA	0.59127		yfjH	0.332469		upp	0.433218		ypfM	0.535032		gatC	0.134454		topA	0.524043		uspA	0.671334		hinT	0.534756		hyfF	0.277783
alaC	0.246841		lsrR	1.05613		ilvD	0.589955		ispA	0.332216		ppiA	0.433176		uxuB	0.53444		fdoH	0.134407		pyrI	0.523598		glnV	0.670965		yijD	0.534533		htrL	0.277386
yfeY	0.24674		yciA	1.05389		ycaC	0.589712		sokX	0.33166		ypjD	0.432991		puuA	0.534334		npr	0.134306		pspE	0.522811		csgF	0.669933		xdhD	0.53411		eutT	0.277309
atpI	0.246674		accB	1.0536		yaeF	0.589571		queA	0.33103		panE	0.432478		yaiU	0.533715		ymfD	0.134207		mhpD	0.522806		ispB	0.669906		lolD	0.533431		yjfF	0.277133
cca	0.246096		yhdT	1.05359		yahD	0.589149		yafT	0.330478		yabP	0.432416		arfB	0.533003		yafP	0.134095		minC	0.522094		treF	0.669443		ybjE	0.532738		ybgK	0.2767
csiE	0.246084		bamA	1.05185		atpI	0.588736		ptsH	0.32979		bcsF	0.432319		hcaB	0.531829		ybjJ	0.134076		insA-7	0.521973		tehB	0.668749		rarA	0.531384		pgaA	0.276446
phoA	0.245957		cyaA	1.05178		malT	0.587822		ilvY	0.329598		yhiK	0.430909		ydgK	0.531735		yqeI	0.133875		ivy	0.521693		preA	0.666787		soxR	0.530232		ymjA	0.275922
ygfB	0.245938		evgS	1.04988		ydfR	0.585665		yafK	0.329482		appA	0.430118		pgi	0.530763		serA	0.133666		yfjS	0.520705		yjcE	0.666475		pspD	0.529586		b2651	0.275537
speC	0.245441		yqjH	1.04929		csiE	0.585644		yajO	0.328859		hdfR	0.429558		yeiW	0.530585		hemL	0.132867		ybfE	0.520129		yhfK	0.666379		yeaG	0.528549		yrfG	0.275402
yaaX	0.245363		arnE	1.04832		argK	0.585553		ynfH	0.32757		yfeH	0.428992		yejM	0.530196		yhcA	0.132818		dinD	0.519906		frvR	0.66561		fecC	0.528393		gspO	0.275393
dsbG	0.245298		yacG	1.04655		fliP	0.583765		hybB	0.327353		yjaH	0.428662		yhfK	0.530185		ribC	0.132502		hyaF	0.519598		yddK	0.664268		ydhT	0.528192		ypdA	0.275045
ydjM	0.244534		ymdA	1.04456		ybjM	0.583271		nei	0.327153		pepQ	0.428559		ompX	0.528354			0.132472		yhfY	0.51916		chpS	0.663944		ycbZ	0.528136		dosP	0.274572
yrhB	0.244427		hemG	1.04354		yigB	0.582103		ydfV	0.326477		yeeJ	0.428063		yghJ	0.526651		rybB	0.132353		ygaQ_1	0.517921		efeU_2	0.663199		yebV	0.526799		kduD	0.274511
dinD	0.244357		ytfE	1.04302		gspB	0.580732		chpS	0.326389		tus	0.427064		fecB	0.526287		yfjY	0.132135		aroA	0.517827		yibQ	0.663169		yraI	0.526748		fes	0.273592
setA	0.244141		pgaA	1.04274		ruvB	0.579901		yjfY	0.326294		yagK	0.427027		rlmG	0.526147		rydB	0.131873		yhjG	0.517727		ybiS	0.663147		cobC	0.526378		gmr	0.272572
ydfV	0.243913		lolA	1.0396		queA	0.578989		dosP	0.325495		hybA	0.426534		ybiI	0.526137		yhfX	0.131581		copA	0.517681		puuB	0.662348		hyfB	0.526371		ydiM	0.271576
yaiT	0.24388		ampD	1.03833		purN	0.578971		bcp	0.325402		lsrC	0.425596		b3254	0.523209		ybeR	0.131516		ydcA	0.517661		abgR	0.662286		casD	0.526354		yhgF	0.270239
yjbT	0.243751		yaiP	1.03754		fabR	0.578552		yobA	0.324306		casE	0.425124		mnmE	0.523129		yfeW	0.131428		rapZ	0.517434		ubiD	0.662113		ruvB	0.525916		ssuB	0.270224
queE	0.243369		ybbB	1.03558		yeaN	0.576275		agaI	0.324202		rhaS	0.425058		yahG	0.522942		xdhA	0.131236		puuD	0.517157		ybbW	0.662105		ycjQ	0.525885		yfeY	0.270212
prfH	0.242904		rep	1.03323		ykgC	0.576047		yidH	0.323572		tatE	0.424809		rnt	0.522611		fadJ	0.131123		loiP	0.515839		ybeY	0.66156		ygfM	0.52485		ompC	0.269251
rpoB	0.242767		csgF	1.03248		yajL	0.575941		yjjP	0.323314		rhaM	0.424593		phnD	0.52199		gfcB	0.130961		rrlD	0.514507		moaB	0.661319		nusA	0.52484		rffA	0.269129
dinI	0.242757		dhaR	1.03233		pspF	0.575735		dinD	0.323		yqgF	0.424473		yggL	0.52182		yjeF	0.130818		yffR	0.513609		ybaK	0.661262		yhhL	0.524554		hyfI	0.268542
mtlA	0.242755		frlB	1.03193		yibI	0.574988		ydjH	0.322985		yhdT	0.424034		apaG	0.520528		ybaY	0.130626		ypjM_3	0.51244		ycdT	0.660904		nusB	0.523927		mutY	0.267784
stpA	0.242479		ydgA	1.03175		queF	0.57496		ydgD	0.322569		msrB	0.423918		frdB	0.519489		yfhM	0.130433		ygiQ	0.512183		b1052	0.660035		insA-7	0.523605		osmE	0.267599
ybfO	0.242308		rlpA	1.03127		cbtA	0.574204		sgcE	0.322387		ygaP	0.423825		trkA	0.518884		yebO	0.130322		dhaK	0.51151		ssrS	0.659172		panD	0.523454		yfgO	0.267581
higA	0.242256		paaB	1.03003		yohO	0.573513		ffh	0.321909		lrhA	0.423635		ffs	0.518241		rstA	0.13018		yhcB	0.511311		glyA	0.658617		yjbI	0.522758		yijO	0.267579
ypjB	0.241779		ypjM_3	1.02938		rnlA	0.573024		ytfI	0.321527		ydjH	0.423399		mutT	0.518205		frc	0.129789		sufD	0.511281		thrU	0.658261		frmA	0.522502		arnB	0.267524
yjbI	0.24177		dsdX	1.02842		uvrB	0.572323		astB	0.321379		nadE	0.422991		ydcN	0.51768		yqjA	0.129609		yhhL	0.510464		murA	0.656938		yfaX	0.521192		ycfT	0.267184
rhsD	0.241768		yaaA	1.02832		xylA	0.571629		ydhL	0.321339		dcuR	0.42212		coaD	0.517276		yfdV	0.129539		tusD	0.510004		ybhU	0.656761		ygcQ	0.521049		ychN	0.26705
gss	0.241638		yihR	1.02793		yodB	0.57011		ppc	0.321113		acrE	0.421854		ymgI	0.516877		ymgG	0.129476		trmH	0.509305		dinB	0.656121		ccmC	0.519146		rpe	0.266359
hha	0.24139		gfcD	1.02719		ogt	0.569786		trpA	0.321027		aaeR	0.421613		ybcD	0.51658		dhaM	0.129464		ysaB	0.508212		ycgI	0.655964		ydcO	0.519064		fecI	0.266232
pspF	0.240901		osmB	1.02192		phnJ	0.569729		ggt	0.32033		dksA	0.421482		lspA	0.516046		flgJ	0.129456		yfbL	0.507232		fbaB	0.655312		ulaG	0.518681		gspG	0.266157
frdD	0.240557		fecA	1.01935		yebV	0.569171		tpke70	0.320106		ispB	0.421344		ispH	0.515601		yfaQ	0.129436		yadD	0.50692		efp	0.655182		pabA	0.518657		chbG	0.265436
cspG	0.240013		ygbI	1.01752		ibpA	0.568954		sanA	0.319856		ilvM	0.421313		gsiB	0.515352		ydeJ	0.129053		ylaC	0.506048		ihfA	0.654658		stfE	0.518165		xerC	0.264921
paoA	0.239988		xapR	1.01675		yffO	0.568338		yraR	0.319804		guaC	0.420772		mcrC	0.515039		hlpA	0.128974		yahL	0.504932		rcnR	0.654596		amiA	0.516701		pgpA	0.264918
tas	0.239951		artI	1.01511		yjeN	0.568184		lptF	0.31971		ybfE	0.420595		ysgA	0.514975		cbl	0.128635		alkA	0.50264		ymdB	0.652567		ykfM	0.516577		patA	0.26459
gpp	0.239803		yhdN	1.01416		gmk	0.567308		yhdN	0.319653		ydaE	0.420209		secD	0.514773		sanA	0.128378		leuV	0.501598		acrE	0.651385		ycjR	0.516063		tauC	0.264134
yjjN	0.239748		nrfG	1.01083		dgoD	0.567194		yfdG	0.319082		ybhM	0.419369		nuoB	0.514559		ynjD	0.128325		dxr	0.500436		lsrG	0.651312		mgrR	0.515967		phnJ	0.263696
yqeJ	0.239506		efeU_1	1.00794		yagJ	0.567027		yggE	0.318817		xapR	0.419238		ddlB	0.514056		ratB	0.12824		rpoN	0.500151		ydfZ	0.650807		mhpB	0.51447		hisH	0.262856
gspA	0.239397		pfkA	1.00564		trxC	0.566935		setA	0.318809		yjtD	0.419173		paaD	0.513962		rem	0.12809		dmsC	0.499899		borD	0.649608		mpaA	0.514141		aqpZ	0.262048
cysG	0.238517		yadC	1.00375		sibA	0.566895		hydN	0.318687		yciO	0.419124		cyoC	0.513561		pgrR	0.128055		uvrC	0.499756		uxaC	0.649502		ftsI	0.512471		paaD	0.261877
yebE	0.23828		folD	1.00341		recX	0.566768		ybcL	0.318601		bfd	0.418955		fdhE	0.513519		rssA	0.127892		rnlB	0.499046		waaF	0.64935		relE	0.512164		fliR	0.261412
kdgR	0.238088		ycbB	1.00149		ynfB	0.566498		yaiP	0.318277		hyfB	0.418306		murC	0.513272		lysR	0.127884		proK	0.49852		mltF	0.64934		accA	0.511863		manZ	0.260908
cdh	0.237833		oppB	1.00046		gapC_1	0.566407		ybaT	0.317862		ycfL	0.416634		katE	0.513085		rhaR	0.127858		ydfA	0.498171		nadA	0.648658		b1052	0.511292		yidC	0.260707
ypjD	0.237784		pepD	0.99907		mntP	0.565648		bglX	0.31785		mug	0.416479		erpA	0.512835		ldhA	0.127798		yadC	0.498063		perR	0.64859		surA	0.510809		yajG	0.260409
rnpB	0.237697		ybeY	0.99565		yjhI	0.56536		fhuC	0.317725		essD	0.416042		envY	0.510937		yahF	0.127747		glnL	0.497476		yehT	0.64776		rplQ	0.509632		prpC	0.259918
ybgA	0.23748		purU	0.993078		yfbU	0.564937		mcrA	0.317568		yfbP	0.415246		ypjJ	0.509904		abgT	0.12759		dcuB	0.49629		ycbX	0.646699		uidA	0.509069		ydjK	0.259857
rsmE	0.237321		cysZ	0.990855		yecF	0.564206		rlmC	0.317542		frlC	0.414891		rpsB	0.509887		proC	0.127455		yeeZ	0.495756		entD	0.646646		ygeA	0.508875		gabD	0.259025
yjhE	0.23607		rpiA	0.989995		tufB	0.563384		rhlB	0.317361		nrdD	0.414796		yaiW	0.509772		waaU	0.127428		yfcE	0.495605		fadJ	0.645803		ybaN	0.508635		hycF	0.258448
yrhA	0.235913		sgbH	0.989508		recG	0.561513		upp	0.316967		mioC	0.414318		manY	0.509366		tpke11	0.127291		ymfN	0.495544		yliL	0.645319		rhtB	0.508427		mltB	0.257524
napF	0.235649		alsC	0.988458		garL	0.559049		yciZ	0.316846		hrpA	0.413884		yciO	0.50842		ispF	0.127219		yehI	0.493963		eptC	0.644238		yoeE	0.50836		dld	0.257263
yegI	0.23475		ycjU	0.987257		elfA	0.55851		yqjK	0.31652		yhfG	0.413256		murQ	0.507836		cobB	0.126994		yghA	0.493221		selB	0.643892		mdtL	0.508348		mrdA	0.257074
pspB	0.234546		yhjX	0.98565		ybcD	0.558097		ymfQ	0.316177		acrB	0.41306		kptA	0.507704		queC	0.126804		sgcX	0.492983		melR	0.64334		yicG	0.507547		macB	0.256803
phnH	0.234435		gcvA	0.983986		ydcH	0.558063		phnM	0.315324		cspA	0.4126		hemC	0.507197		manA	0.126769		gadB	0.492087		C0293	0.641688		ycdX	0.50731		amiD	0.25518
yeaR	0.233235		ppiB	0.983339		nuoG	0.557046		hemG	0.314926		bglG	0.412459		yicN	0.507192		ygcW	0.126661		mreD	0.492068		mdtJ	0.640809		moaA	0.506792		dcuS	0.255056
slp	0.232945		glpC	0.982751		ylbH	0.556871		ycgN	0.314918		yrbL	0.411966		adiC	0.506866		yidF	0.12598		symE	0.491194		yjgW	0.640739		phnO	0.506149		pstB	0.25473
insH-6	0.232915		atoC	0.980615		prfC	0.556085		ygfF	0.314682		yciE	0.411889		yedJ	0.506793		ybbD	0.125883		yhdP	0.491004		cusA	0.639521		ddlA	0.505176		yghF	0.254617
yhcC	0.232298		serC	0.979712		recO	0.555948		lyxK	0.314273		helD	0.410098		ygfB	0.505927		wcaE	0.125718		ubiD	0.490397		nfrB	0.639278		ydeQ	0.50448		murJ	0.254413
ybeU	0.232025		yhhS	0.9781		gutQ	0.555589		panF	0.314208		yjeH	0.409085		lsrD	0.505809		ispB	0.125706		ulaR	0.489748		ygeF	0.638725		phnN	0.503862		fliT	0.254338
glf	0.232019		zupT	0.976835		pqqL	0.555583		yedP	0.313379		C0293	0.407954		ygbJ	0.505348		entS	0.125574		yoaG	0.489725		cysZ	0.638627		fkpA	0.503576		ribB	0.254257
yhhY	0.231694		yfcI	0.974241		atoB	0.555515		ydcT	0.313225		yphF	0.407423		hisI	0.503896		torY	0.124821		nrdE	0.489491		ribA	0.638266		yjhP	0.503484		fliQ	0.254185
ylbH	0.231385		yidB	0.972073		yfaH	0.55543		ygiW	0.313203		ygiN	0.407244		yhaM	0.503816		yfeX	0.124603		priC	0.489477		tfaD	0.637873		feoC	0.502396		yagP	0.253722
ribC	0.231057		kdpB	0.971507		yoeB	0.55499		etk	0.312527		iadA	0.407009		hisG	0.502251		ydcZ	0.124586		yohC	0.48943		yaeF	0.637072		crl	0.502266		modC	0.253554
molR_2	0.230943		lptE	0.970934		tynA	0.55482		yedS_1	0.312397		queE	0.406351		nuoM	0.501568		hflC	0.124561		yhiN	0.488745		dsdX	0.636154		arnC	0.501033		tdh	0.253128
fsaA	0.23074		ybhL	0.969977		ynfC	0.554503		ugpE	0.311951		fucA	0.40629		malM	0.500541		hisP	0.124065		ydiL	0.487807		ulaB	0.635884		bluF	0.50044		frvA	0.25283
rph	0.2305		ushA	0.9676		yqeJ	0.554374		fixC	0.31163		phoR	0.405777		nuoE	0.500443		tusB	0.124038		queD	0.487782		ybfC	0.635396		pdxA	0.500426		ybfA	0.252325
ybaA	0.230357		malS	0.967501		ppx	0.553226		gapC_2	0.311497		lit	0.405747		exoX	0.500189		raiA	0.123919		bglG	0.487372		iap	0.635302		elaB	0.499957		cyaY	0.252285
yohP	0.229763		paaC	0.967041		leuE	0.552197		yafN	0.310953		ypeB	0.405679		iraP	0.500142		mngA	0.123793		ypfM	0.485958		renD	0.634552		rpoS	0.499948		sodC	0.251987
frwC	0.229628		ecpE	0.965075		rcsD	0.551871		dicC	0.310636		mhpT	0.405567		recG	0.499327		secA	0.123767		minD	0.48586		yieE	0.634473		purD	0.499623		mscM	0.251836
dedA	0.229552		yjbB	0.96262		mepH	0.551818		deaD	0.310611		ilvE	0.405154		pstB	0.498383		ybaV	0.123762		fliQ	0.485673		coaD	0.633935		pbl	0.499402		ssuA	0.250265
yecR	0.229366		dinJ	0.962358		yfbO	0.551484		smf	0.310479		psrO	0.404953		rutE	0.498326		hsdM	0.12375		rnd	0.484482		sxy	0.633145		yfaP	0.497874		bglG	0.249372
ybgJ	0.229354		ompC	0.961029		narH	0.55139		yeeL_2	0.310375		rpoH	0.40439		nuoN	0.498198		yfbT	0.123588		ypdB	0.484283		hflX	0.633104		fbp	0.497671		mgtA	0.249307
xapR	0.229218		deoD	0.959242		ihfB	0.55129		gpsA	0.309418		sspB	0.404309		yhjB	0.498049		ves	0.123294		rpoS	0.48387		ydfR	0.632991		pinE	0.49734		tatB	0.24851
ydhJ	0.229059		uup	0.957894		yiaF	0.550831		ycgM	0.309407		pgaA	0.40415		ydiT	0.497489		nudL	0.123057		ptsN	0.483532		yafZ	0.632816		ubiD	0.496971		coaA	0.248457
ydfP	0.22903		ygiN	0.95714		sgcA	0.550538		yzcX	0.308931		yeiE	0.404122		ptsA	0.497449		mprA	0.122955		ybcF	0.483369		fadL	0.631958		sgrS	0.495742		ycdZ	0.248451
argW	0.22874		yodB	0.954211		tdcE	0.548902		metK	0.308386		glpC	0.403833		rsfS	0.49743		yqjI	0.122761		raiA	0.482537		fabI	0.631267		yihF	0.495481		secY	0.248333
ybbN	0.228739		hybO	0.953001		ynaA	0.548618		yfiM	0.308294		yggP	0.403165		qseB	0.497255		pspB	0.122688		yhhN	0.48234		ygdT	0.629837		sgbU	0.495315		argA	0.248004
bcp	0.228699		ytfI	0.951791		yjhB	0.547594		yhcF	0.308048		bluF	0.403018		tusC	0.496965		ymfK	0.122571		yaiY	0.481477		intD	0.629814		yqgD	0.49437		hyi	0.247969
acrE	0.228234		eutB	0.951071		yfcD	0.547134		yceQ	0.308028		yncE	0.402665		yoaA	0.496964		ytfI	0.122481		sanA	0.481263		yggL	0.628621		sad	0.493163		tynA	0.247957
puuB	0.227581		rtcA	0.951025		yagB	0.546598		ampD	0.307959		gapC_2	0.402103		cspE	0.496602		ssuA	0.122452		bsmA	0.481104		alaS	0.628576		lsrG	0.493087		insL-3	0.247568
rutA	0.22746		ypfJ	0.950299		allB	0.546384		dtd	0.307894		atl	0.402068		gadE	0.496491		flgI	0.122426		ynaI	0.48099		yoaD	0.628192		napF	0.492882		yjdM	0.246872
nanC	0.226975		yajC	0.950282		yeaR	0.546006		mobA	0.307519		hypD	0.402027		fadJ	0.496405		mrdA	0.122336		ydbH	0.480836		ydeS	0.627322		ykgA	0.492659		yfdV	0.246845
gloB	0.22672		yqfG	0.949885		cspI	0.54588		yhaV	0.307484		miaB	0.40159		rraA	0.495535		argT	0.12223		pheT	0.480365		sucB	0.627279		mhpC	0.492081		dhaL	0.246068
rlmB	0.226444		hisH	0.945817		prpB	0.545661		selA	0.307402		pspC	0.401197		yqhH	0.494551		cydC	0.122195		cyoB	0.479895		ahpF	0.627079		truB	0.491571		can	0.244237
ydiN	0.226289		truD	0.943437		yibF	0.545557		gspH	0.307173		ampG	0.400743		ygjP	0.494481		ybgO	0.122089		yfjD	0.47986		sucA	0.626722		thrB	0.49131		cheW	0.243579
macB	0.225986		lapA	0.943322		yhdX	0.54463		racR	0.30706		coaD	0.400487		yqeI	0.494302		yoeI	0.121688		fimD	0.478314		yjhG	0.626658		glpR	0.491164		cirA	0.243424
ybhL	0.225854		uxuA	0.943307		ykfH	0.543147		sdaB	0.30694		ldhA	0.400378		tyrR	0.493292		citF	0.121675		gor	0.478095		ycgB	0.626574		yjbL	0.490911		sstT	0.243341
yahB	0.225709		birA	0.93947		rydB	0.542697		ydjA	0.306689		rcsD	0.399973		srmB	0.493182		lyxK	0.121599		yggW	0.477764		yfiM	0.625938		yggT	0.490722		yoaH	0.242974
yqiH	0.224504		fadJ	0.93921		ypeC	0.542573		prlC	0.306253		pqiA	0.399623		intB	0.493035		yahN	0.121305		ymfK	0.477566		ycdY	0.625755		yhbQ	0.489587		brnQ	0.242132
psuG	0.224227		lpoB	0.939174		yehX	0.542301		ynaK	0.305815		prpC	0.399369		ybaY	0.492219		yfiP	0.121187		yqiA	0.477326		accC	0.625732		b0105	0.489053		emrA	0.241613
gatD	0.224154		yigA	0.935809		dosC	0.54226		potF	0.30575		yliI	0.399211		ygcN	0.492104		ruvA	0.120728		ydaQ	0.47732		murF	0.625669		rutD	0.488871		ansP	0.241465
pstA	0.223523		ykfF	0.934645		fliO	0.540804		yfcD	0.303989		pyrE	0.399194		pncB	0.491939		tfaE	0.120696		tisB	0.476537		ibaG	0.624175		araH	0.488809		marC	0.241453
ymfS	0.223506		yiaY	0.933196		ycgY	0.540013		ytfK	0.303939		appY	0.399185		phnO	0.491474		yagI	0.120606		cysQ	0.476336		yniC	0.624055		hsdR	0.488361		sufD	0.241429
yahE	0.223126		hyfF	0.931139		hslR	0.539917		recT	0.303854		ysaA	0.399164		rlmF	0.49075		ybdG	0.120585		tusE	0.476125		yqgE	0.623918		cpdB	0.487982		fliK	0.241258
ymfH	0.223011		wcaD	0.930593		azoR	0.538931		hycI	0.303668		pgaB	0.39808		flgN	0.490565		yebY	0.120529		fdhD	0.475525		nanR	0.623795		nikC	0.487508		miaB	0.239836
yeeY	0.222465		narQ	0.928897		ycgX	0.538462		ylbF	0.303645		yehQ	0.397309		gspA	0.490304		thiI	0.120457		cobT	0.474992		greB	0.623756		yihN	0.486889		hupA	0.239824
casA	0.222114		yneM	0.928015		ycgG	0.537756		cysM	0.30364		glcE	0.396665		ydeK	0.489728		mdtQ	0.120408		sibE	0.474864		ychH	0.62363		yhcO	0.486267		yggN	0.239521
pgaA	0.222108		rffC	0.927703		arpB_2	0.537695		arsR	0.302807		ynhG	0.396592		cspC	0.488943		yciB	0.120374		yncK_2	0.474539		ydiZ	0.622977		ycaN	0.485617		lptD	0.239301
iaaA	0.221836		dhaM	0.925393		uspB	0.537449		yidK	0.302444		ymgE	0.396342		ydgA	0.488422		osmF	0.120341		ydfV	0.474426		yegK	0.622173		yaeF	0.485208		yhiD	0.238861
metK	0.221491		hyaB	0.922035		ilvB	0.537064		C0343	0.301961		lsrA	0.396003		yqjC	0.488235		paaA	0.120318		hrpB	0.47414		ybgP	0.621746		gcvB	0.484904		murB	0.238719
yhiL	0.221473		yihO	0.921605		cptB	0.536506		ybhS	0.301694		ynfO	0.395871		metN	0.488085		yrhB	0.120244		ykgN	0.474129		yeiS	0.62052		yhdU	0.484892		yeaN	0.238141
yicH	0.220648		msrA	0.921572		ampH	0.536091		accC	0.301208		ypjK	0.395556		ydfA	0.487742		yahA	0.120231		mscL	0.47293		yahC	0.620443		pbpC	0.484607		cobT	0.237163
hisI	0.220182		ltaE	0.920414		suhB	0.535893		ygeF	0.301131		yqgD	0.39545		rplK	0.487598		ycaO	0.120208		yfdH	0.472774		tyrT	0.620201		secD	0.484321		yehS	0.23608
argB	0.220035		uidR	0.9175		ygiD	0.535301		ydcC	0.30078		yaiO	0.393423		dapD	0.487393		frdB	0.120158		ygeF	0.471551		bamE	0.619984		yicC	0.48432		sucC	0.236036
aroL	0.219659		atpB	0.915564		rzpD	0.535252		yjfF	0.300726		ylbF	0.392716		ydcC	0.48656		rep	0.12		fimA	0.47145		yjaZ	0.61951		nadK	0.484277		ydjE	0.235522
ykfI	0.21939		clsC	0.914891		sfmD	0.534761		aroF	0.300674		narH	0.392477		yjjK	0.486535		cvpA	0.119993		ygdT	0.471382		afuB	0.619457		fliA	0.484231		yhcN	0.234693
yjhG	0.219111		yphF	0.914443		pspB	0.534747		yebY	0.300195		ydcY	0.392131		sbcB	0.486136		blc	0.119722		yraK	0.470388		yjgX_2	0.618882		b0309	0.483387		ppdC	0.234554
panB	0.218416		yobF	0.913887		pstA	0.533095		wrbA	0.300017		chbC	0.392047		baeS	0.485967		yffR	0.119659		tyrT	0.469918		rsmF	0.618854		ynjD	0.483236		hemX	0.234031
truB	0.21814		mlaB	0.913327		yciQ	0.533082		yciQ	0.299408		sapC	0.391918		sgcB	0.485649		nikR	0.119629		ileS	0.469898		valS	0.61863		ydjN	0.48292		dinF	0.233217
umpH	0.217922		ftsB	0.911773		yhcN	0.531939		ycfD	0.299326		yijF	0.391528		uspE	0.484963		rsxB	0.11962		yhcN	0.468799		kdsB	0.617224		yjhB	0.482172		ybjL	0.233156
leuD	0.217365		narK	0.911191		chpB	0.531435		dinB	0.299027		flgH	0.391364		yjjL	0.48432		msrA	0.119613		groL	0.468549		ydhZ	0.615946		livH	0.481551		sgcC	0.231879
yeeJ	0.217125		clpA	0.911005		rpsF	0.53081		grcA	0.298553		ssuC	0.39022		creC	0.484123		ydhY	0.119553		yqjI	0.46794		ybjC	0.615918		ryfA	0.481352		yjiJ	0.231685
spoT	0.216663		ftsW	0.905522		rpsM	0.530253		ybaQ	0.298494		rsmE	0.389962		yhjH	0.483313		dpiA	0.119184		yicS	0.467576		dgoD	0.615437		abgT	0.481238		casC	0.231557
ybfH	0.216394		frvX	0.905031		yhhA	0.529778		fliQ	0.297867		gfcE	0.389576		ybeM_1	0.482602		ybiC	0.119135		yagM	0.467012		ygeK	0.615312		ves	0.481229		ninE	0.231151
hyuA	0.215989		pheA	0.904024		ilvM	0.528722		yccU	0.297856		ygiD	0.389497		nuoF	0.482219		chbB	0.118984		iap	0.466886		rydB	0.613958		ybfQ	0.480623		yjhI	0.231041
yedV	0.21595		yicJ	0.902658		cysC	0.528367		qmcA	0.297705		ytfK	0.389411		sgbU	0.48167		glmY	0.118891		narZ	0.466711		mntP	0.613574		yliL	0.480116		ynfE	0.231039
yraQ	0.215733		yidC	0.900707		entF	0.528364		moeB	0.297679		ygbM	0.388402		lon	0.481518		purR	0.118811		paoC	0.466653		yajO	0.613545		pepD	0.479658		frwB	0.230958
norV	0.215697		nrdI	0.899927		ymfA	0.527328		ynfC	0.297565		yfaX	0.387349		artM	0.480339		luxS	0.118775		dps	0.466581		ryeA	0.612989		ypfM	0.479656		talA	0.230743
atoS	0.215684		yfcJ	0.898944		prfH	0.526865		yaeH	0.297507		dhaR	0.387075		leuD	0.480257		C0067	0.118491		C0465	0.466556		yehQ	0.612961		ymfQ	0.479435		speC	0.230483
zapD	0.215681		yafE	0.896735		eaeH	0.526224		yjiV	0.297419		trkG	0.386993		ybiA	0.48021		hemA	0.118436		ydbA_1	0.465596		yfiE	0.611278		aroG	0.478428		cmtA	0.230077
ascB	0.215212		micM	0.89659		rlmD	0.525194		amyA	0.297139		acnA	0.386949		yajC	0.479674		narP	0.118435		cynR	0.465405		ppiC	0.610751		glcG	0.478239		fecD	0.229908
ybhI	0.214946		ccmB	0.89406		kefB	0.524925		alaC	0.296764		hofC	0.386784		cobS	0.479311		cfa	0.118412		afuC	0.465242		ysgA	0.610457		ygdT	0.477999		napH	0.229566
rssB	0.214493		abrB	0.89362		yeeD	0.52466		panB	0.296332		paaX	0.38663		ygaC	0.479157		yjhD	0.118338		thiE	0.464345		ycgZ	0.610046		fsaB	0.477964		allA	0.229068
ampH	0.214418		mdoD	0.892184		ybeD	0.523931		yhhX	0.2963		tauB	0.386421		mazG	0.479027		bsmA	0.118214		ygeX	0.464223		yghT	0.609544		murE	0.47733		clpP	0.228475
mdtC	0.213863		yobB	0.891886		ulaA	0.52347		fnr	0.296082		rbsR	0.386396		argD	0.477837		yjbT	0.117893		C0614	0.46422		prfA	0.609439		ybaE	0.476978		gspD	0.225918
yfaV	0.213772		yeiH	0.891716		rhsA	0.523045		frdD	0.296008		dipZ	0.385994		malP	0.477507		yhhW	0.117767		yfdP	0.464156		ycbF	0.608909		yehA	0.476933		hyfR	0.22541
guaD	0.213696		yfcC	0.891628		argS	0.522778		setC	0.295469		ppiB	0.385943		ytfA	0.47662		ghrA	0.117644		ygfM	0.464018		paoA	0.608167		dicB	0.476789		dut	0.224859
aspA	0.213506		yjiS	0.891431		garR	0.522716		ygcQ	0.295372		ymfR	0.385803		eutS	0.476284		ypdJ	0.117523		rpmI	0.463676		araH	0.607982		yfaV	0.475958		dcuC	0.224828
dcm	0.213423		trpE	0.885935		msrA	0.522704		ykgG	0.295165		artI	0.385563		ypfJ	0.47625		yicJ	0.117442		frmR	0.461717		uspD	0.607492		ftnB	0.475815		yqgF	0.224095
ldhA	0.213381		yijD	0.885873		insH-1	0.52266		spy3'	0.295071		ydhX	0.385303		cysI	0.475792		pphB	0.117116		alkB	0.461574		frlC	0.606624		micM	0.474373		uup	0.224082
yhdW	0.213281		cysG	0.885627		ydiK	0.521097		yoaB	0.294924		uvrA	0.385235		pinE	0.474746		bdcA	0.117038		yncI	0.461304		ybeF	0.606433		menA	0.474314		argF	0.223594
yfhM	0.213245		mreD	0.882623		mntR	0.520581		yhfU	0.294869		yjeN	0.384648		rppH	0.474303		focA	0.116834		b0725	0.461144		yeaQ	0.606386		insG	0.473941		menA	0.223566
talA	0.213077		patA	0.881875		glmM	0.520283		proC	0.29432		lsrF	0.384306		yehE	0.473603		trkG	0.116754		wbbL_2	0.461104		nupC	0.605367		ygbI	0.473741		htgA	0.22326
insA-7	0.212592		cydD	0.881419		yicC	0.520003		phnL	0.293962		rpiR	0.384164		acrZ	0.473505		napD	0.116712		hyaA	0.460688		insO-1	0.604389		cyaR	0.473725		pstA	0.223249
elfD	0.211867		hycG	0.881232		ybeM_2	0.519836		cheB	0.293927		hsdR	0.383878		nudJ	0.472585		osmC	0.116598		talB	0.459922		rutD	0.604223		rhtA	0.47352		fhuE	0.222514
kefB	0.211826		yegK	0.881079		sapC	0.519766		yejH	0.293832		rlmE	0.383665		sgcC	0.472194		clcA	0.116571		mnaT	0.459712		dacA	0.60348		ibaG	0.473495		cpdB	0.221587
yfdF	0.211707		yfiH	0.879569		ycjW	0.51969		insG	0.292911		zapA	0.383334		ycbL	0.471833		insK	0.116432		blc	0.45958		trmJ	0.603295		yqgA	0.473245		iraP	0.221424
lptD	0.210377		yjhF	0.879482		ygeP	0.519317		glf	0.292135		ykgD	0.382163		nuoI	0.471728		ddpA	0.116367		cstA	0.459206		yhiM	0.60313		phnD	0.473138		ydcR	0.221408
aroM	0.210365		yibI	0.878334		ybhR	0.519015		ybgS	0.292059		ypfJ	0.381494		yahA	0.471701		cynR	0.116265		rlmH	0.459171		mazG	0.602683		ampG	0.47263		yfiH	0.220904
argD	0.210159		hycC	0.877591		yejK	0.518413		ybeM_2	0.291776		marR	0.380535		zitB	0.471614		yqiA	0.116153		chbG	0.457784		yibG	0.602441		ydhI	0.471847		ydjA	0.21992
fur	0.210066		tatC	0.876601		rph	0.518376		ytfB	0.291761		lldP	0.380398		yacG	0.471245		yjbJ	0.115979		fdoH	0.457739		yefM	0.602337		yffB	0.470958		yegU	0.219687
ibaG	0.209047		yebK	0.869163		acrB	0.5166		yjiT	0.291563		pfkB	0.380119		lsrK	0.470952		wbbJ	0.115662		emrD	0.456317		ygiB	0.601952		mhpF	0.469554		yccX	0.219655
yhhH	0.208653		yjgA	0.867128		yeaH	0.516208		alsE	0.291548		yceQ	0.379539		yfiH	0.470946		yfjH	0.115619		yfcU	0.456306		ydcJ	0.599691		msrC	0.469459		uhpB	0.219163
adiC	0.208439		tqsA	0.866954		yhfT	0.515282		ybiU	0.291294		ydiY	0.378727		acpT	0.469913		tolR	0.115603		rlpA	0.455831		ybcN	0.599038		rstA	0.469428		cobC	0.218769
ymgD	0.208423		pstC	0.86588		ecpC	0.512608		ypfJ	0.291254		tdh	0.378565		yghU	0.46917		yohC	0.115544		intZ	0.455713		gltD	0.598517		ribA	0.469112		mdtD	0.218633
menA	0.208296		dcuS	0.865132		cynT	0.512538		aroE	0.291072		ycbJ	0.378365		trpB	0.468154		chbG	0.115446		paaI	0.455229		eptA	0.598459		gltF	0.468799		ugpB	0.218588
pyrB	0.208165		ybhR	0.863388		ddlB	0.512396		abgB	0.290991		rlmN	0.378085		pflA	0.468014		fliC	0.115428		yjbQ	0.455063		trg	0.598183		ykgF	0.468763		yebG	0.218575
trmL	0.208102		fecC	0.863234		cas2	0.510631		slmA	0.290764		priC	0.3777		yjbE	0.467223		yfdC	0.11537		yhcM	0.454828		yehY	0.598133		aspA	0.468589		yiaO	0.217093
rpe	0.207962		gudP	0.860504		yghR	0.510413		minE	0.289751		tdk	0.377532		yedL	0.466234		ykgG	0.115245		yhjC	0.45482		pheT	0.597234		rrlH	0.468052		ulaD	0.216663
dhaR	0.207545		abgR	0.860175		yceM	0.510387		fau	0.289625		kefB	0.377326		norR	0.466232		yebK	0.115148		yifN	0.454725		menF	0.595803		cysE	0.467491		ybeM_1	0.216594
yheU	0.207352		mreC	0.858723		agaS	0.510277		eutM	0.289409		lepB	0.377172		glvC	0.465329		ycgG	0.115032		aroM	0.453139		ydjI	0.595044		yfcV	0.466407		mreD	0.216053
hsdR	0.207291		yehP	0.858493		rluD	0.509008		nirD	0.288759		melA	0.37623		xanP	0.465103		nrdR	0.114587		ybhM	0.452719		ydgC	0.594547		alsK	0.466194		tauA	0.216052
ybjM	0.20721		yfcU	0.857357		yffP	0.508994		serB	0.288295		yahE	0.376095		yddB	0.465003		ydcM	0.114543		inaA	0.45081		yhhN	0.59379		yghD	0.465891		dipZ	0.21526
sdiA	0.207065		kbl	0.855329		yjdP	0.508977		ykfC	0.287474		nrfG	0.375358		ybhS	0.464006		nepI	0.114467		ybdD	0.450646		fepE	0.593538		fepB	0.465364		fabR	0.21522
yggP	0.207063		nsrR	0.854577		flgL	0.508825		ygfI	0.287126		carA	0.375282		ypdJ	0.463599		ybcQ	0.114363		basR	0.450442		sspB	0.593359		gss	0.465294		cusB	0.21507
ydhB	0.207034		marC	0.853697		rfbB	0.508546		mutT	0.286877		ppx	0.37527		efeB	0.463426		ynfG	0.114326		trpA	0.450311		paaG	0.592702		yhdE	0.465014		sucD	0.214714
thiP	0.206407		ybbJ	0.852954		yecT	0.508165		folM	0.2866		yfhH	0.37503		ung	0.463372		sppA	0.114206		ygaC	0.450258		phoP	0.592638		fhuD	0.464947		yihN	0.214538
ymfJ	0.206363		mrdA	0.849458		tesA	0.50709		ygaP	0.286191		cedA	0.374944		yliF	0.463365		csgF	0.114114		yiiE	0.448642		yheT	0.590403		umuD	0.464734		psuT	0.214463
sppA	0.206351		psiE	0.846294		ryjB	0.506503		flhB	0.286121		yjcZ	0.374807		purP	0.462798		aegA	0.114112		yneL	0.448041		glgB	0.590371		livM	0.464248		pck	0.213619
ulaF	0.206345		hisM	0.845816		yhjC	0.505919		kdpB	0.286048		eutP	0.374175		surA	0.461954		pepQ	0.11395		ispG	0.44804		sraF	0.589826		ygeX	0.463905		pflA	0.213173
ygdD	0.206248		yqeH	0.8416		pstC	0.505867		ybjH	0.285294		accC	0.374171		abgT	0.461757		yhcO	0.113361		lapA	0.447793		ykgC	0.589561		ycaQ	0.463785		xseA	0.21305
yeaW	0.206242		yhbX	0.840623		pgi	0.505344		ligA	0.285011		yjdO	0.373673		yebG	0.461415		yjhW	0.113181		lolA	0.447734		yijD	0.589467		purK	0.462933		spf	0.2129
yfdC	0.206215		der	0.839312		yidX	0.505093		frvA	0.284337		allE	0.373389		araD	0.461009		yjhI	0.113163		rseP	0.447682		yjjP	0.589188		ydhY	0.462653		wbbI	0.212672
livF	0.205929		emrB	0.838952		yjgZ	0.504647		cobB	0.284109		xseB	0.372766		yqeJ	0.458904		yfbV	0.112853		fliT	0.447371		yagU	0.588422		yraQ	0.462459		galR	0.212174
rhaR	0.205926		agaR	0.837897		ftsY	0.504478		rimM	0.284016		rpoE	0.372633		ivy	0.458773		ilvD	0.112713		yniA	0.447112		ycfH	0.588103		chbF	0.461017		waaQ	0.211035
ycaP	0.205241		ybcC	0.833834		yecR	0.503257		yahC	0.283947		infB	0.371951		ratB	0.458285		fryB	0.112691		ilvG_1	0.446549		cpxP	0.587845		pgsA	0.460848		sdhD	0.211034
rutG	0.204125		mdoH	0.833662		ecpB	0.503061		iscA	0.283915		ybfN	0.371501		yjeT	0.458196		mtlR	0.112169		yeaJ(dgcJ)	0.446533		nuoG	0.587618		yhiD	0.460619		rsd	0.210752
moaC	0.204097		ybaV	0.833176		nadD	0.50284		tas	0.283908		glmS	0.371457		fliT	0.458088		ymfM	0.112137		yihQ	0.445747		pstA	0.587408		ecpC	0.460129		gcvT	0.21025
ykgI	0.203961		ymgE	0.833012		yggP	0.502378		fryA	0.283719		manY	0.371197		ompF	0.458003		mscK	0.112031		slyB	0.4455		phnN	0.587124		zapC	0.459586		acrD	0.210073
ycgY	0.203717		mdtC	0.831433		rutF	0.501538		truB	0.283712		hns	0.370335		galS	0.457797		ppc	0.112015		bcr	0.445428		pepN	0.587069		ydiS	0.45895		dmsD	0.209778
intR	0.202776		dcyD	0.830329		ybfF	0.501516		yibQ	0.283696		panF	0.369976		yajI	0.457541		grcA	0.11191		truB	0.445155		ldrC	0.586796		pabB	0.458545		yjhD	0.209741
eamB	0.202591		ynfB	0.828492		murI	0.50046		yicG	0.283581		serT	0.36927		uvrY	0.457173		cueR	0.111815		ydfJ	0.444957		ycfK	0.586633		mscM	0.458504		marA	0.209639
ddpX	0.202585		manY	0.828023		aslB	0.5004		sibE	0.283542		galR	0.369014		fliI	0.457002		ycgX	0.111742		fbp	0.444561		yagH	0.585369		rluF	0.458503		aspC	0.209408
allB	0.202308		aroP	0.827266		cho	0.499565		rnd	0.282986		yahG	0.368768		fadH	0.45663		yddM	0.111482		ygfF	0.44423		guaA	0.58513		tpx	0.458008		entC	0.208708
yqiK	0.202053		rrlG	0.82665		yeaO	0.498946		ompL	0.28277		ubiG	0.368313		tolR	0.455776		ymgF	0.111462		tatB	0.444143		ppa	0.584823		purH	0.457752		yegR	0.208617
mltF	0.201675		dinQ	0.826414		yceO	0.498746		pdxY	0.282765		torI	0.367785		purE	0.455022		citD	0.111441		hslO	0.444134		pyrH	0.584819		ivbL	0.457325		malI	0.208578
fimE	0.20133		pdxY	0.82508		insF-4	0.498671		fhuD	0.282693		pspE	0.366901		ytfB	0.454944		alsK	0.111397		potB	0.443977		ydiK	0.584469		nirC	0.456983		tam	0.208518
caiB	0.201216		yaeF	0.824741		cnu	0.498655		galK	0.282612		agaC	0.366662		yedE	0.453669		cybB	0.111359		ycgG	0.443948		htpX	0.583502		yhjC	0.45651		tauB	0.20819
ykfC	0.200946		rfaH	0.824664		ptsI	0.496898		ydcJ	0.282574		ydbJ	0.36648		ispG	0.453515		rutG	0.111322		mdfA	0.443927		yahE	0.583388		ychS	0.456333		ilvE	0.207601
cas1	0.199633		tsaB	0.824547		ybiU	0.496243		pphB	0.282568		dppA	0.366379		ykfH	0.453215		yeeP	0.111273		ulaE	0.443461		ykfK	0.582426		hdhA	0.456329		gntR	0.207206
uxaC	0.19927		argP	0.824264		ftsP	0.496129		rihB	0.281045		cof	0.366191		rfbA	0.452931		rlmH	0.111272		ytjB	0.44269		yjjY	0.581023		ucpA	0.456175		yjiX	0.2072
chbC	0.199201		yheU	0.823254		pyrL	0.49612		yegL	0.280921		mrr	0.36608		yqjE	0.452619		pgm	0.111151		yhhQ	0.442669		uup	0.580864		yjjK	0.45487		glpA	0.206852
ilvG_1	0.199141		dnaA	0.82323		yecM	0.495074		elfG	0.28076		grpE	0.365814		ybjH	0.45125		ygbA	0.111046		yegV	0.441717		abgA	0.580823		yahG	0.453708		phnN	0.206176
yjjJ	0.199097		dxs	0.822624		insM	0.494979		yecM	0.279958		ygiH	0.365515		oxyS	0.451136		cbpM	0.110977		miaB	0.440824		elaD	0.580385		ypeC	0.453436		ybeZ	0.205471
hipA	0.19885		uhpA	0.821097		fimB	0.494752		fixX	0.27992		ycdU	0.364427		fimH	0.45035		galM	0.110961		ybfB	0.4407		tsaE	0.579208		yfiM	0.453321		zwf	0.205171
queC	0.198747		yccX	0.820142		hha	0.494198		pyrL	0.279879		xseA	0.364369		fimC	0.4486		fau	0.110847		typA	0.440685		caiB	0.578465		proB	0.451874		yneH	0.204155
ampC	0.198613		ymcE	0.819853		hipB	0.49397		frwC	0.279579		yigF	0.364248		treB	0.448411		cysI	0.110834		yceB	0.440335		yphB	0.578051		waaA	0.451338		cusC	0.203809
fbaB	0.198388		puuB	0.818874		frr	0.493888		yiiF	0.279465		yebK	0.364203		rlmN	0.448249		yjdF	0.110832		hdfR	0.439666		ynhF	0.578032		ugpE	0.450867		fldA	0.203649
ymfE	0.19837		thiP	0.8188		ucpA	0.493811		yghD	0.279126		narU	0.364159		emrB	0.448118		yfjX	0.110669		yegQ	0.438983		exoX	0.577763		yfjU	0.450688		argR	0.202698
yjhH	0.198344		cobC	0.817992		yceB	0.493598		dctR	0.278942		ykfK	0.363718		ushA	0.447264		dmsC	0.110321		ydcR	0.43832		atpH	0.577662		mocA	0.450448		fepB	0.202654
spf	0.198148		fucI	0.81646		rpoE	0.49331		phnE_2	0.278911		ybfC	0.363671		talA	0.446946		puuD	0.110299		mrr	0.43811		ybjG	0.577028		frlD	0.45028		galM	0.201816
yehU	0.198027		tdcE	0.816336		rpsJ	0.493002		mcbR	0.278529		yfdN	0.363185		astD	0.446553		dnaJ	0.110281		gnsA	0.436947		appA	0.576595		srmB	0.450017		phnE_1	0.201708
gpsA	0.197876		ygcW	0.81621		ymfH	0.492355		dxr	0.278481		yabI	0.362671		etp	0.446294		ydjE	0.110112		yqiB	0.436446		yhcO	0.576336		yhgN	0.44935		cusR	0.200096
yfgF	0.197802		hlpA	0.815805		trpE	0.492313		hicA	0.278442		mhpC	0.362528		guaB	0.446209		rcnB	0.109937		ydhQ	0.433937		yaaY	0.576304		glgB	0.449015		dsbB	0.20008
yafN	0.197739		rseA	0.815804		ydjE	0.492214		ybgJ	0.278054		rsmD	0.362488		nfuA	0.445684		lspA	0.109547		intG	0.433131		bssR	0.576165		exuT	0.448899		caiB	0.199966
ysdC	0.197453		htrL	0.81509		essD	0.492149		yeaD	0.27771		pka	0.362268		ispD	0.445291		pflD	0.109423		ycaN	0.433018		ydcD	0.575452		chaB	0.448837		arnT	0.199591
bdm	0.197031		lepA	0.814791		truB	0.492005		sseA	0.277327		yiaG	0.362131		arnA	0.444586		dmsB	0.108874		yhcA	0.431969		yehC	0.575043		ypdB	0.448068		yohK	0.198344
ychO	0.196971		ybcM	0.814702		hyfH	0.491491		lysW	0.276637		hflK	0.361952		rrrD	0.444556		baeS	0.108858		ybgK	0.431385		yjaH	0.57483		tolR	0.447809		fucU	0.198289
alkA	0.196614		ybjE	0.814295		ycjY	0.491472		yfjM	0.276136		moaB	0.361434		yegQ	0.44436		uraA	0.108746		cspA	0.431366		mepH	0.573979		yffR	0.446996		codA	0.197753
ydgK	0.196402		garR	0.813948		rssB	0.490417		ybgK	0.275966		yfhM	0.361274		yajR	0.443325		yqiJ	0.10874		ynjD	0.431302		chpB	0.572763		ubiX	0.446599		tamA	0.19737
pdhR	0.196264		wcaC	0.809111		xapA	0.48987		lsrD	0.275756		fucP	0.361246		nuoH	0.442975		ytjA	0.108683		ydaF	0.431264		yaeR	0.572048		flhB	0.446176		lldP	0.197337
lldP	0.196118		proC	0.808024		dbpA	0.489676		sdsP	0.275606		tyrS	0.360265		ada	0.44263		frvB	0.108207		nrfA	0.430759		hypB	0.571607		melR	0.446083		yedE	0.196469
ydcZ	0.195536		xseA	0.806139		yegZ	0.489044		rem	0.275511		ves	0.359929		ygbK	0.442406		cdh	0.10812		yibH	0.43029		yoeF	0.571247		gpsA	0.445701		degP	0.196122
ypfH	0.195335		rraB	0.805484		yaaX	0.488977		yiiG	0.275412		glpF	0.359483		yjbH	0.442203		gloB	0.108105		proQ	0.430082		gabT	0.570991		citG	0.44538		mtgA	0.195445
eutA	0.195327		nudB	0.805192		hflX	0.488501		insF-4	0.275201		yihS	0.359363		htrE	0.441487		nirB	0.107959		pflC	0.429977		lolD	0.570708		yfgH	0.445359		rseA	0.194572
rlmC	0.195267		kefC	0.804455		hscB	0.487126		holE	0.274785		fadL	0.359074		yoaC	0.441181		ycjM	0.107912		murJ	0.429814		fis	0.569955		yoeI	0.44494		phoQ	0.194448
ulaA	0.19515		ygiS	0.803888		nrdR	0.486699		yghE	0.274408		yeeA	0.35847		proQ	0.440976		gapA	0.10767		mdoD	0.428509		creA	0.569419		sfmA	0.444723		dppA	0.194231
cpdB	0.19508		yaeI	0.803039		gltF	0.486102		ycaP	0.274347		citD	0.356669		yiaJ	0.440597		yaiY	0.107661		efeO	0.428431		ydcH	0.569282		yjbR	0.444274		pncA	0.194146
glpF	0.19471		hisC	0.802554		yoaD	0.486035		sgrR	0.273269		mqsR	0.356185		yjhU	0.440118		lsrD	0.107659		yjjB	0.428398		ydeN	0.568807		yliI	0.444216		ppc	0.193918
glmM	0.194111		yihT	0.801829		dcyD	0.485054		pgaA	0.273131		argO	0.35579		mdtK	0.43987		lafU	0.107577		ymjA	0.426664		ygjV	0.568454		ydhJ	0.442728		rcsA	0.193722
ymfN	0.194028		topB	0.80166		prkB	0.48501		crl	0.272891		rpiB	0.355716		emrA	0.438959		nfi	0.107466		lpxH	0.42662		yebW	0.567686		cbpM	0.442296		thiH	0.193596
clsC	0.193916		yphA	0.800207		ybcW	0.484957		ybeX	0.272615		yddJ	0.355289		thrB	0.438871		maa	0.107327		ygiB	0.426413		purB	0.567481		rpmI	0.441652		ynbB	0.193495
ychG_2	0.1937		paaZ	0.798351		ygjI	0.484454		higA	0.272522		cdh	0.355033		yjfN	0.437945		blr	0.107301		lafU	0.424578		yqhH	0.567463		yhiJ	0.441428		xylA	0.193245
yedP	0.193388		hipA	0.794341		mokC	0.484105		yjjY	0.272359		focA	0.354918		sapB	0.437608		mnmE	0.107197		ecnB	0.424287		yahO	0.567208		glcD	0.440696		yjjM	0.193067
secB	0.193352		hemC	0.793269		cas3	0.483335		emtA	0.272122		ribA	0.354764		aphA	0.437007		yfcV	0.10657		malZ	0.423948		yheV	0.567082		leuV	0.440618		rfbC	0.193025
ftnB	0.19329		pykF	0.792788		ybjL	0.483136		napD	0.272026		zipA	0.354244		rnb	0.436524		livF	0.106557		aslA	0.423923		rplI	0.566719		mdtK	0.439817		mglC	0.192686
yffS	0.193184		yihA	0.792272		ypaA	0.482747		mrr	0.272019		nohA	0.353564		yeaP	0.436403		eptA	0.106542		ydeR	0.423618		ynaK	0.566681		nlpD	0.439545		rlmJ	0.192606
yehL	0.192827		appC	0.791234		gshB	0.482746		yegS	0.271866		uidR	0.353505		pyrB	0.436246		ygdH	0.106272		diaA	0.423226		yhaJ	0.566103		rraA	0.439132		mreB	0.19245
pykA	0.192503		glgX	0.790949		yfiL	0.4815		narY	0.271675		ybdF	0.352874		ackA	0.435511		yfjD	0.106125		ytjC	0.42301		lhr	0.565157		yafU	0.43843		potA	0.192078
pyrI	0.19249		yjhR	0.787699		yeiI	0.481187		yfdN	0.271461		ahpF	0.352089		napD	0.435468		ilvN	0.106115		amiA	0.422807		yfjL	0.564778		leuD	0.438325		gntT	0.191987
ygaQ_1	0.192273		truC	0.78734		nfuA	0.480145		perR	0.27144		yiaA	0.352024		ulaR	0.434775		hycF	0.105932		yfjZ	0.422547		mhpC	0.563643		rbsA	0.438202		ulaG	0.191769
xseB	0.191741		ytfF	0.787244		glnH	0.479279		fimD	0.270719		paoA	0.351813		dcrB	0.434231		purB	0.105929		yegL	0.42241		dsrA	0.563404		yhdJ	0.438137		amtB	0.191744
kdpF	0.191727		bacA	0.787076		speD	0.475723		yhdP	0.270489		hemA	0.35163		mngR	0.433913		iadA	0.105841		ligA	0.421745		recQ	0.562757		ybfC	0.437631		mdfA	0.190268
hscB	0.191724		yiaM	0.78546		tsr	0.475721		ddpA	0.270407		rfbX	0.351136		ilvG_2	0.433743		uxaC	0.105783		katE	0.421045		citD	0.562083		argO	0.437465		ccmA	0.190239
yfeA	0.191643		tolR	0.785332		rlmJ	0.475295		proL	0.270217		pepE	0.350754		cdaR	0.433303		pptA	0.105749		hpf	0.420185		yfgG	0.561551		rsmJ	0.437347		yjeM	0.189798
phoU	0.191523		dapD	0.783455		yiaT	0.474734		dsrB	0.270145		rsmA	0.350701		yecD	0.430661		rrlA	0.105686		yddE	0.420054		acnB	0.5611		yfdL	0.436991		sfsB	0.189072
yncH	0.191203		ulaB	0.780271		ykfF	0.474691		ycdF	0.269995		holC	0.35066		yhjV	0.430166		csgC	0.105608		yghZ	0.419458		aroF	0.560832		yjeI	0.436976		btuF	0.18832
chbR	0.190809		nhaA	0.779165		ypdI	0.474399		sbp	0.269942		yhbQ	0.350549		ygjH	0.430114		cspF	0.105488		leuA	0.419441		sgcC	0.560616		nikR	0.436669		tsgA	0.188129
iadA	0.190443		rsd	0.77797			0.473662		secY	0.269914		cvrA	0.350506		cspG	0.430076		rsxD	0.105307		citE	0.41936		mscS	0.560561		ygfB	0.43513		yeiW	0.187633
moaD	0.190393		yhjY	0.777524		oxc	0.473022		yaiW	0.26972		ptrA	0.349817		era	0.429889		ynaA	0.105103		ltaE	0.419252		yidI	0.559998		mscK	0.434995		dxs	0.187526
yzcX	0.190348		ydfH	0.774775		ppa	0.472609		gudX	0.269546		bdm	0.349364		ybjN	0.429607		yihM	0.105007		fepB	0.419067		glgP	0.55969		rhsC	0.434718		htpG	0.187476
yceQ	0.190257		glgC	0.774646		glpF	0.472524		yehC	0.269396		pncC	0.348919		Phantom Gene	0.428573		yaiI	0.104897		ycbL	0.418839		aslB	0.559056		yaiA	0.434498		torZ	0.187234
hsdS	0.190099		waaF	0.772753		tnaB	0.472188		ompF	0.269286		ftnA	0.348508		murG	0.427839		yhjC	0.104874		metQ	0.418819		tpke70	0.558229		yfaU	0.434088		dgoT	0.187228
yfiR	0.189998		nanE	0.772033		yabQ	0.47216		yihY	0.269245		yhbP	0.348469		ecnB	0.427664		mak	0.104864		yihR	0.418274		tauA	0.557587		ispD	0.433811		mlaF	0.187076
yqgA	0.189878		secG	0.77138		ydaU	0.472016		phnH	0.269169		glyA	0.348444		yciW	0.427208		ivy	0.104849		katG	0.417745		yjgH	0.556704		yfbM	0.433468		iscR	0.186566
ynfG	0.189859		argF	0.768017		yhfX	0.471548		gadX	0.269025		tbpA	0.348205		emrE	0.427045		exuR	0.104725		ybbN	0.417688		yhhS	0.555978		tdcR	0.43329		rimJ	0.185613
yhhN	0.189616		napB	0.767987		ccmB	0.471206		degS	0.268947		ybaE	0.348154		yhdE	0.426613		asnA	0.104698		yfeD	0.417507		pqqL	0.55529		rybB	0.432965		yiaU	0.185585
uspB	0.1892		yiaK	0.767892		dcuD	0.471056		yqjF	0.268535		mnmC	0.348089		yhaV	0.425549		yddJ	0.104635		bioB	0.417461		yegQ	0.55516		ydeU	0.432835		trpC	0.185377
ygiD	0.189138		kdpC	0.767597		xapB	0.470267		patD	0.267944		udk	0.347477		btuR	0.425308		ydcH	0.104615		agp	0.417351		polB	0.554993		yihD	0.432013		garD	0.185155
ydeI	0.188961		phnF	0.767421		pepP	0.470227		dgkA	0.267934		ynjD	0.347459		trpD	0.425125		dosP	0.104502		ryfD	0.416883		yjiS	0.552811		norW	0.431813		yfcJ	0.185099
dinF	0.188926		sibB	0.767326		ydbJ	0.469578		greB	0.267731		acrD	0.347331		yfcG	0.424903		tpiA	0.104377		yaiU	0.415478		hypF	0.552737		ybiO	0.431628		hcaT	0.18497
ycjO	0.18869		yjhQ	0.767101		ybbM	0.469328		yjaH	0.267586		yacH	0.346837		aes	0.424281		pncB	0.104255		yafC	0.415267		glnK	0.552619		yajG	0.431284		aes	0.184868
yfdV	0.188463		ytjA	0.7667		ynfL	0.4693		nagB	0.267522		argU	0.346741		sxy	0.421831		bfd	0.10419		yghW	0.414719		mdh	0.552155		prpB	0.43064		cyoC	0.184636
ybbJ	0.18843		ybaL	0.764865		ybjC	0.469062		gspM	0.266621		ycaD	0.345321		bluR	0.421494		ykgC	0.10413		ykgM	0.414663		allR	0.551084		gspD	0.430203		narY	0.184537
yjjK	0.188092		entD	0.76445		yqgD	0.46889		yedY	0.266445		speF	0.345174		rihC	0.421448		ybaQ	0.103846		frlD	0.414603		hsdM	0.55004		ssuD	0.429701		ftsK	0.184435
greB	0.188059		hyaE	0.762524		treF	0.468158		cusS	0.266323		yqhH	0.345061		bcp	0.42121		hipB	0.103681		yjgM	0.414597		mcbA	0.549986		exoX	0.429474		cysE	0.184223
aegA	0.187903		cmk	0.762358		clpS	0.468061		fadR	0.266258		cbrB	0.344202		paoC	0.421097		aidB	0.103661		nagA	0.414368		yjiA	0.549768		tehA	0.429384		fieF	0.184069
yfdP	0.187585		cas2	0.762109		gspH	0.467579		ymfT	0.26613		fliT	0.34403		gpp	0.420822		tyrP	0.103646		yhfS	0.414149		sfmD	0.548429		oppB	0.42933		gcvR	0.183483
yobD	0.187251		yzcX	0.760672		ymfL	0.467376		infC	0.266052		yegW	0.343831		yjbR	0.420726		yoaB	0.103602		pqqL	0.413903		ydjK	0.548371		yfiN	0.42926		mltA	0.182415
yheV	0.187164		dadA	0.759801		serU	0.466976		thiG	0.264364		nlpD	0.343674		sgbE	0.420701		pphA	0.103088		glnA	0.413265		thyA	0.547092		gltP	0.429239		mtr	0.182044
glnH	0.187147		alaE	0.756686		gcvT	0.466511		narI	0.264243		cbrC	0.343615		ppx	0.420333		pcm	0.102961		erfK	0.413092		csgC	0.545828		mrcA	0.428991		cheA	0.182007
trkG	0.187044		yegL	0.756467		yfeA	0.466104		ebgA	0.264048		lpxD	0.342872		tusA	0.420167		ycaI	0.102716		fryA	0.412619		ftsP	0.545747		yaeR	0.42895		ydcU	0.181029
ubiH	0.186902		yhiM	0.754869		yejG	0.465985		ucpA	0.263687		fadM	0.342651		recC	0.420022		fucI	0.102569		frlB	0.411985		yehB	0.544082		rnlB	0.428892		dppD	0.180938
nanS	0.186833		pmbA	0.754455		mutM	0.465606		bdcR	0.263472		yfcH	0.342264		arnD	0.419947		ybjO	0.10256		yfgH	0.411336		gspI	0.543939		ugpC	0.428418		gcvP	0.180468
ydaQ	0.186656		ydhC	0.754372		menF	0.465523		fabG	0.263471		hisP	0.342209		ynbA	0.419927		hofB	0.102516		arsC	0.410576		pphA	0.543741		yecM	0.428154		folP	0.180355
pntA	0.186117		ibpB	0.753446		topA	0.465056		ybeF	0.263336		mcrB	0.342026		yihT	0.419359		glnQ	0.102358		yedN_1	0.410322		glf	0.543517		ygjV	0.42797		btuE	0.180073
murJ	0.18597		acrB	0.751729		rhtA	0.464986		ydcF	0.26307		yghR	0.341587		dsdC	0.419352		dsbG	0.102208		ybeQ	0.409982		tilS	0.543285		entC	0.427702		rutA	0.179498
appC	0.185895		ihfB	0.751669		b3254	0.463871		yhdY	0.262852		aroL	0.341388		ycdX	0.41922		yhdH	0.10218		frlR	0.409909		ygfZ	0.543214		yadL	0.427665		yeeO	0.179338
ybeT	0.185724		yggE	0.749665		phnN	0.463354		yddJ	0.262797		yhfS	0.341293		ydhX	0.419185		yihR	0.102084		moeA	0.409695		ygiN	0.5431		yfdG	0.426681		yggR	0.179322
bamC	0.185585		ascG	0.748709		pspG	0.463091		torR	0.26265		ubiA	0.340868		yeaQ	0.419017		uhpB	0.101924		tsaE	0.409424		lptD	0.542937		yidB	0.426552		lnt	0.179108
ydhQ	0.185398		lptG	0.74853		yihU	0.46286		rsmJ	0.262296		csgA	0.340536		yhfY	0.417765		srlD	0.10175		ybjS	0.409012		cas3	0.542908		ycfH	0.426503		leuO	0.179092
prpD	0.184659		yceK	0.746641		ycjD	0.462777		yjhX	0.262285		ybeY	0.339861		dfp	0.417281		fdhD	0.101737		yqeI	0.408461		metR	0.542721		dacA	0.425536		yhdZ	0.17907
yoaA	0.184618		dnaE	0.746221		yjfK	0.462544		yaiA	0.262143		pitA	0.339785		yacC	0.416899		ydaV	0.101624		ychG_2	0.407628		galM	0.54259		hyfG	0.425246		fhuA	0.177518
yfbR	0.184591		rlmI	0.743949		mrp	0.462206		mdtD	0.262072		ycfZ	0.339624		suhB	0.416714		yahO	0.101452		ycdX	0.406317		tsf	0.542027		dadA	0.424888		luxS	0.177425
yhbT	0.184522		bioH	0.743415		ygeV	0.462028		sroG	0.262049		sppA	0.339562		aspC	0.416526		ychG_2	0.10144		ninE	0.40619		upp	0.541809		rbsC	0.424544		xthA	0.177023
yffR	0.184196		rpe	0.741597		hisB	0.461235		yeiE	0.26177		ccmD	0.339182		recO	0.41563		yciU	0.101392		yfeH	0.406078		norV	0.541554		phoP	0.424531		glpX	0.176046
ttcA	0.184177		rrrD	0.741573		ygjJ	0.460132		yfeN	0.261396		tsr	0.338701		yhdZ	0.415325		norR	0.101186		panC	0.405721		ymdF	0.540486		appA	0.423757		trxC	0.175855
ynaJ	0.184122		gspF	0.737629		ssuC	0.459662		yebG	0.261162		rdlC	0.338505		argH	0.41446		intR	0.101158		ydaW	0.405591		araA	0.540267		accD	0.42337		tdcA	0.175806
yhdX	0.183822		yejB	0.737465		ycaO	0.459329		gntP	0.260919		treR	0.338274		ydbC	0.413523		flgK	0.101046		pgpA	0.405574		yidZ	0.539831		ydhR	0.422941		yjdL	0.175716
lplT	0.183698		nrfD	0.737027		gltS	0.458833		mdtE	0.260881		mltB	0.337268		yjcE	0.413406		yhgN	0.100963		yddH	0.405313		yegR	0.539041		hyaA	0.422129		umpH	0.175637
ydcA	0.18348		ymgG	0.736134		trpD	0.458824		ymjC	0.260568		rbsA	0.337223		yliI	0.41274		aspV	0.100806		ygjR	0.404927		ygeO	0.538838		dmsC	0.421908		crr	0.175293
ydfT	0.18338		nuoG	0.73601		rplD	0.458158		dpiB	0.260213		sokB	0.337006		stfE	0.412458		mrdB	0.100614		yggM	0.404813		spy3'	0.538538		yggF	0.421784		dhaM	0.175132
cirA	0.183328		ybbM	0.73542		elfG	0.458104		rnlB	0.260142		rlmM	0.33663		fliA	0.411751		mtlA	0.100568		yfaS_2	0.40441		nrfG	0.538252		maeB	0.421438		dgoD	0.174725
kdpD	0.182966		yceD	0.735126		tusB	0.456545		yfjS	0.259843		yjfJ	0.336553		nuoL	0.411546		yibT	0.100472		ycbZ	0.403882		dapE	0.538189		yidF	0.421212		fimA	0.173637
hydN	0.182728		essQ	0.733936		yddA	0.45547		aceK	0.259275		molR_2	0.336427		ybcJ	0.410986		lpoA	0.100444		gspH	0.403636		helD	0.538108		menC	0.421048		yedA	0.173551
yibG	0.182567		mngR	0.733833		setB	0.455257		purC	0.258891		yaeI	0.336227		rpsP	0.410866		purF	0.100377		yrbL3'	0.403537		fruL	0.537748		ygaC	0.419868		gsiA	0.172037
rbsA	0.181919		rng	0.733099		yoaI	0.452902		glvC	0.258564		yfcZ	0.335752		yeaD	0.410741		ttdB	0.100258		clpS	0.403379		wcaK	0.537171		yeiE	0.419495		rybB	0.171999
yhjA	0.181795		ldrC	0.732821		nsrR	0.452376		ybhC	0.258228		yjhF	0.335682		ygiS	0.410693		yobA	0.100218		yagL	0.403147		dadA	0.536138		yoaG	0.41844		mppA	0.171844
ybjH	0.181774		csgB	0.731855		cas1	0.451764		yedS_3	0.257959		rybA	0.33565		yegL	0.410277		ycfD	0.100049		ydcM	0.402964		ligB	0.535674		wzzE	0.418392		ybhG	0.171654
ymdA	0.181733		ypfM	0.731482		yfcP	0.451449		napH	0.257706		waaG	0.335613		mhpA	0.409697		ykfA	0.0999532		pinH	0.402615		ampH	0.535452		atoA	0.417625		pntB	0.171391
yhjY	0.180912		mdtE	0.730829		tktA	0.451115		lhr	0.257268		mtlR	0.335185		gshA	0.409141		phnF	0.0999433		clpA	0.402553		smf	0.534684		pyrC	0.417376		hisA	0.171023
hicB	0.180375		msrC	0.728911		yraH	0.45111		relE	0.257125		pflB	0.334158		ycdT	0.409073		mtgA	0.099846		sgcB	0.402533		aceK	0.533193		sgcQ	0.416995		rffM	0.171011
mreD	0.180037		hyaA	0.728367		ygeW	0.450668		sbcD	0.257025		ydiL	0.334031		nadD	0.408673		yfaL	0.0997736		ynbA	0.402453		ampE	0.532929		yhfL	0.416988		wzzE	0.170865
sspA	0.179859		queF	0.728113		yidJ	0.450527		yfcO	0.256907		argS	0.333165		glnV	0.408308		xylE	0.0997217		tatC	0.402447		yigP	0.532775		bamC	0.416954		psd	0.170234
borD	0.179465		cyoD	0.727485		flgC	0.450144		ompN	0.256029		lptD	0.333115		sufD	0.407516		hisD	0.0988359		ruvB	0.401979		fadR	0.532278		ykiA	0.416357		narI	0.169815
cytR	0.179304		ybbY	0.727436		ydjO	0.449799		mscL	0.255812		eptB	0.333108		queC	0.407256		yjfZ	0.0988253		ytfG	0.401717		glnH	0.532118		ybdH	0.416262		yejB	0.169399
lsrC	0.17903		rstA	0.726018		yeeJ	0.448704		yihD	0.25527		glcF	0.332634		yqeF	0.407059		bluF	0.0987398		yhbE	0.401203		tufB	0.531874		gatR_1	0.415709		fecC	0.169159
arpB_1	0.17901		yjbH	0.724647		ybbN	0.447951		hybE	0.255117		yidF	0.332125		ugd	0.406912		pepD	0.0987385		mlaB	0.401202		livH	0.531647		yggC	0.415696		nlpD	0.168825
purL	0.178701		thiD	0.722795		ygcU	0.447867		yddM	0.254888		ydhK	0.332046		ydiL	0.406804		ygcG	0.0987264		leuS	0.401156		ycfP	0.531243		lpxK	0.415606		lepB	0.168326
trpB	0.178408		ilvN	0.72258		recQ	0.44784		yccJ	0.253929		lacA	0.331693		csgC	0.406166		soxR	0.0987239		mdtH	0.400743		ispG	0.530288		nudG	0.415587		adk	0.167902
hdeB	0.178267		ydiO	0.721995		uxuB	0.446665		nrdR	0.253929		yajL	0.331636		gadC	0.406139		hybB	0.0986066		eutK	0.400434		trpS	0.530035		ychA	0.415584		treB	0.167378
zitB	0.177947		dgoT	0.721287		mrdA	0.446		yhgF	0.25364		uxuB	0.331478		yaiT	0.405591		mtlD	0.0984194		rcsD	0.400329		fucP	0.52961		ydiH	0.415178		hypD	0.167167
nusB	0.177499		napG	0.721129		tsaD	0.445894		puuP	0.253241		yiaM	0.331223		barA	0.405136		dsdX	0.0981998		trmI	0.399732		bamB	0.529534		yaiO	0.414877		ulaC	0.166968
yidH	0.177478		menA	0.718151		ygaV	0.445065		rsgA	0.253177		ycfD	0.330742		yeaY	0.404445		ampD	0.0981753		fliM	0.399561		cheW	0.528721		yedS_3	0.414437		tqsA	0.166719
thrB	0.177271		fadB	0.71743		nemR	0.444682		tus	0.253081		rssB	0.330722		yihV	0.404381		pldA	0.0980464		pgpC	0.399235		insH-11	0.528719		cusB	0.413995		ybiV	0.166713
ilvA	0.177243		atpE	0.71636		lpxD	0.444659		serU	0.252969		yhcM	0.330637		yfjP	0.404157		ykfI	0.098001		galM	0.399015		lptG	0.528567		speA	0.413787		narG	0.166456
creA	0.177189		mnmE	0.715103		cpdA	0.443986		dinG	0.252794		ynfN	0.330438		wcaA	0.403795		ptrB	0.0979794		yaeQ	0.398708		katE	0.528245		rsgA	0.413068		hcr	0.165947
tpx	0.177155		mltD	0.714766		smf	0.442962		rluF	0.252675		atoC	0.330412		yhdN	0.403562		mutT	0.0979484		gph	0.398698		ribD	0.528169		yjfK	0.412862		ghrA	0.165676
msrB	0.176955		gltJ	0.713343		yjcC	0.442939		mrcA	0.252635		yqjF	0.330374		ydcF	0.403255		dauA	0.0979457		yhjJ	0.398559		dinF	0.527438		ycaM	0.412541		hslV	0.165441
bglH	0.176836		yahB	0.712438		gstA	0.442851		ymfP	0.252566		kup	0.329877		ybcH	0.403106		miaB	0.0978424		pntB	0.398314		nrdR	0.525726		yfcH	0.412382		xdhA	0.165393
udk	0.176723		ecpD	0.712319		ydaN	0.442199		yqhG	0.252416		nudJ	0.329291		ilvH	0.402782		arpA	0.0975611		iraP	0.397676		fau	0.525663		ttdT	0.412373		anmK	0.165075
hycA	0.1766		yebG	0.712084		obgE	0.44193		fadK	0.252128		ypjM_3	0.329163		chbA	0.401798		murJ	0.0974711		yidQ	0.397585		yfaL	0.525535		pflB	0.411501		lpxP	0.165043
syd	0.176472		lepB	0.709722		yraI	0.441507		thiF	0.251909		yehX	0.328751		ybbL	0.400735		emrD	0.0974609		pepD	0.397053		arcZ	0.524127		yjiT	0.411072		leuE	0.164742
mdtG	0.175819		trkG	0.709608		yjbQ	0.441307		yddW	0.251775		phnC	0.32866		yqaB	0.399979		ybbP	0.0973814		yfgJ	0.396861		puuP	0.524104		tatC	0.411019		flgF	0.164531
gdhA	0.175066		fliP	0.708809		gss	0.441238		ychO	0.251768		ybcL	0.328476		purT	0.399794		eamA	0.0973142		pgaB	0.396449		otsB	0.523737		acnA	0.410705		ansA	0.164521
yzfA	0.174787		xdhC	0.708457		uidC	0.440865		yceA	0.251626		rpmI	0.328336		fimG	0.399606		hypB	0.0972452		ydcO	0.39636		yraQ	0.52333		hokD	0.410045		rbsD	0.164487
ygfK	0.174708		entC	0.707689		yicH	0.440156		fdnH	0.25103		uraA	0.328055		yeeA	0.398799		tisA	0.097095		ychO	0.396285		yncE	0.523318		rffT	0.409979		mipA	0.164012
panF	0.174638		nfi	0.707606		ydcX	0.440035		yjiJ	0.250693		ydbA_1	0.327946		phnC	0.398567		pgaA	0.0970544		ispD	0.395927		mdtL	0.523317		cynX	0.409507		hcaF	0.162851
rluA	0.174216		acrF	0.706883		mdtA	0.439983		garD	0.250617		gltP	0.327737		prkB	0.398347		rcsC	0.0970401		galS	0.395082		ydhS	0.523149		anmK	0.409486		nuoL	0.162851
ybjP	0.173908		eutA	0.706389		cspF	0.439746		queC	0.250411		apaH	0.327256		envZ	0.398043		ulaR	0.0970295		chbA	0.395041		gspB	0.522944		cadB	0.409356		ttdT	0.16249
dsbC	0.173836		ybgQ	0.705674		ykfB	0.439625		ycjP	0.250343		ycjV	0.327219		fabB	0.397676		ychG_1	0.0970256		ykfC	0.39504		ghrB	0.522256		mdtF	0.408995		atpH	0.161173
yhhQ	0.173495		ynjF	0.705418		rayT	0.439589		yaeI	0.250039		trmH	0.326847		yfiR	0.396566		hyuA	0.0968265		lpcA	0.394808		frmA	0.522115		pspA	0.408684		plaP	0.160011
ribE	0.173349		pflB	0.705372		ychN	0.438564		ampC	0.249633		ygaC	0.326838		mcrB	0.396553		yaeH	0.0966999		yegH	0.39422		yeaI	0.521716		acpH	0.408085		eda	0.1591
dgcZ	0.173131		trpC	0.70517		citD	0.43808		ydhR	0.249609		yfcQ	0.32598		ypjM_3	0.396158		ychJ	0.0965741		prpR	0.394182		tynA	0.521709		carA	0.408047		lyxK	0.158194
ssrS	0.173022		entS	0.70477		dgkA	0.437946		ydfB	0.249583		paaE	0.325906		lsrA	0.396045		arpB_1	0.0964716		gstA	0.393178		yecN	0.521518		nrdG	0.407071		lacI	0.158164
leuU	0.17262		fnr	0.702631		mpl	0.437549		yphA	0.249322		sfmF	0.325357		yobA	0.395981		nadA	0.0964551		rlmG	0.392547		yzfA	0.521406		insE-4	0.406475		yhhJ	0.157789
speE	0.172559		yecM	0.70232		yacH	0.437094		idnO	0.248727		hsrA	0.325204		ldhA	0.395875		sapB	0.0961459		ybiO	0.392495		yfcZ	0.52068		citF	0.406405		fliA	0.157778
ydjI	0.172552		yraQ	0.701199		gcvB	0.436978		ves	0.248653		allR	0.325177		menE	0.395487		gspG	0.0959147		pncC	0.391751		yciT	0.520217		yeaX	0.405797		fepG	0.157217
pbpC	0.172519		kduI	0.700691		yehB	0.436804		yoeA	0.248241		ybdG	0.325167		yqfB	0.394995		bssR	0.0957745		dapD	0.391252		sokE	0.519879		ybfO	0.404866		deoR	0.157072
nuoG	0.172514		lamB	0.699992		yciA	0.435939		dadA	0.248128		ybdR	0.324968		gfcD	0.39438		yaaI	0.0956611		emrE	0.39096		yagP	0.519719		ynfD	0.404705		ftnA	0.15683
yggW	0.172456		purD	0.699601		casE	0.43592		gloB	0.248052		yoaI	0.324624		fimZ	0.394256		ydhX	0.0956609		yqjH	0.390296		yggS	0.519649		mutT	0.404501		pgl	0.156075
yjiC	0.172296		dcuD	0.698229		phoE	0.435777		grxD	0.247965		yjfP	0.323764		agaI	0.394184		yoeF	0.0956187		gudD	0.390061		yihN	0.519497		ycjM	0.404451		acs	0.155222
yieH	0.17227		thiM	0.697645		ebgA	0.435286		nuoE	0.247677		endA	0.323676		kdgR	0.394003		yegT	0.0955079		mntR	0.389736		ruvB	0.518193		truA	0.404273		eamB	0.154717
secG	0.172091		pstS	0.694976		phnC	0.434892		puuD	0.247402		thiD	0.322931		pepT	0.393498		fimF	0.0954289		cbl	0.389734		tusC	0.518138		hyfF	0.404271		flgE	0.154491
cbrB	0.171787		ydiN	0.694142		yedV	0.432331		ybiP	0.246818		ycfP	0.322867		fucK	0.392955		ycgZ	0.0953752		yeaI	0.389387		yhiJ	0.517265		bssS	0.404182		yiaN	0.154081
pstB	0.171577		yjjW	0.694131		dsdA	0.432092		ybhR	0.246771		dpiB	0.322866		marR	0.392367		sbmA	0.0953406		ycjV	0.387842		ydhT	0.517217		yddM	0.403954		rseC	0.153984
ascF	0.171549		ulaE	0.693551		rbsD	0.432059		wecH	0.246645		rutD	0.32285		ybjT	0.392035		yqiB	0.0952745		yqjG	0.387558		yeeO	0.516344		hybF	0.403939		sspA	0.15338
thiI	0.171477		flgN	0.693181		zraS	0.431974		proB	0.246473		rluA	0.32231		ymgA	0.391061		rlmN	0.0951928		queC	0.387157		yoeA	0.516131		emtA	0.403906		gudP	0.153304
yfcE	0.171411		ddpX	0.693148		hisH	0.431759		yehL	0.246418		uhpB	0.322291		pyrF	0.390505		fadH	0.0950183		yagP	0.386544		dicC	0.516032		oppA	0.40372		paaZ	0.153282
hycI	0.171362		ribF	0.692741		cysH	0.431447		sdsR	0.246331		mtgA	0.32202		pncC	0.390475		yedL	0.0949448		yehE	0.386031		hdeA	0.51517		ispA	0.403513		yqaB	0.15289
glvB	0.171032		ryeA	0.692389		hyfD	0.43141		yjhU	0.246202		pphB	0.32144		yebQ	0.390337		yeaE	0.094847		slyD	0.385737		speC	0.514818		galU	0.403013		yqeG	0.152811
yfgO	0.170999		evgA	0.691336		yibL	0.431203		b0725	0.245664		ydgA	0.321394		aroK	0.390176		yfiC	0.0947539		ydfH	0.385608		frsA	0.51473		yaiV	0.403008		yojI	0.152477
psiE	0.170689		tusC	0.689601		yhgE	0.431086		exoX	0.245398		ftsW	0.320302		gshB	0.390009		ydiV	0.094726		grxD	0.385341		fucA	0.514401		yafS	0.402675		idnO	0.152395
ybcI	0.16993		ylcH	0.687232		tsaC	0.431038		yqfB	0.245207		rrsC	0.320093		yeeX	0.389967		ttdR	0.0944466		tatA	0.385302		ydiB	0.513502		ybeX	0.402354		moaD	0.151489
hisD	0.1692		bcsB	0.686038		yhjA	0.430755		ygaH	0.244978		yhhX	0.320082		nuoC	0.389928		yrfG	0.0943814		ybjC	0.384731		yihS	0.513036		yjiJ	0.402319		aer	0.151419
torS	0.168742		hdeA	0.685667		erfK	0.430639		yeeP	0.244694		fdoH	0.320026		efeO	0.389557		yehE	0.0942192		cheB	0.384202		rppH	0.512972		uidB	0.402155		modB	0.151309
glvG	0.168637		aidB	0.685364		creC	0.430463		ghrB	0.244532		cbl	0.319787		ddpF	0.388775		cspB	0.0941132		htgA	0.382809		rseP	0.512912		tauA	0.402107		rpoH	0.150919
lpxD	0.168332		glk	0.685246		uvrD	0.429914		yjjJ	0.244512		yjbB	0.319729		thiK	0.388654		yjeJ	0.0941033		yfjM	0.382808		xseB	0.512813		yjdN	0.401652		rseP	0.150669
ygcU	0.168187		fdnH	0.684637		lepA	0.429715		ymfN	0.244167		rpmH	0.319627		cheR	0.388399		yqhG	0.0940764		araB	0.382567		trxC	0.512337		chbB	0.401488		yqhG	0.150246
hyfC	0.168078		dipZ	0.68433		yadG	0.429644		yfcI	0.244049		ushA	0.318494		sucB	0.388294		clpB	0.0940072		mutH	0.382467		ygfB	0.511896		yecE	0.401188		cyoD	0.150177
ybiH	0.167551		flhE	0.6835		ykfI	0.428604		yfgG	0.243829		yjiJ	0.318202		grxA	0.388075		aroM	0.0939521		wcaJ	0.38209		ygdD	0.51189		lsrD	0.400411		sgcE	0.149394
menC	0.167404		pspA	0.682837		argI	0.428424		rydB	0.243621		mtfA	0.317488		fhuE	0.38776		panZ	0.0939231		ykgJ	0.381571		ynfB	0.511677		glvB	0.397391		pgi	0.149223
ypdE	0.16737		alx	0.680508		glyQ	0.428394		yqiA	0.243154		rybB	0.317334		yqaA	0.38774		ipeX	0.0937991		znuB	0.381369		hypE	0.511258		ybgQ	0.397091		gspE	0.148684
frlB	0.167151		flgK	0.68044		kdpD	0.427826		gshB	0.243098		ycaL	0.317295		pbpC	0.387467		rlmG	0.0937624		fliZ	0.381336		rcnB	0.51101		fur	0.396981		gsiB	0.14835
yciB	0.166965		tktA	0.679606		edd	0.427433		accA	0.242776		dinJ	0.317183		nikR	0.387331		php	0.0936904		rpmJ	0.381246		ybbP	0.510521		citC	0.396015		gatZ	0.147287
ygjV	0.166483		pdxK	0.677914		zitB	0.427137		ecpD	0.242604		wcaE	0.317033		ubiC	0.387216		yciN	0.0936149		eutG	0.380918		rffT	0.509939		bioA	0.395832		atpI	0.147229
yfjR	0.166344		lldP	0.677701		yifE	0.42711		rspA	0.242561		cyoD	0.315914		chbG	0.387137		sufD	0.093292		prkB	0.380605		ugd	0.509415		mdtM	0.395814		pntA	0.146719
nupC	0.16603		torT	0.677162		glvB	0.42664		zapB	0.241916		ynfB	0.315581		nusB	0.387106		yjeO	0.0931697		ynaA	0.380526		aroP	0.509166		yegW	0.394307		motB	0.146659
cyoC	0.165955		cmoB	0.676607		lpd	0.42658		yhaO	0.241794		ybcK	0.315164		ydhQ	0.387046		potE	0.0929754		mak	0.380145		recN	0.508865		rseP	0.394072		ybgE	0.146557
rsxA	0.16595		mdlA	0.675582		zapC	0.426178		mgsA	0.241591		yfdC	0.31481		glnU	0.385971		yjaA	0.0928412		yafJ	0.379954		pyrC	0.508464		cbeA	0.393567		ibpB	0.146459
glmZ	0.165798		leuD	0.673406		smrA	0.426072		dedA	0.241568		yicJ	0.314492		lolE	0.385633		tdcD	0.0926989		alaC	0.379864		dnaC	0.507814		hybA	0.393518		csiR	0.146431
yfjS	0.165737		apbE	0.672384		ydaF	0.42607		atoD	0.241495		pepD	0.31431		sufA	0.385531		yehQ	0.0923184		yiaC	0.379711		cadB	0.506811		hyuA	0.393185		yraJ	0.145677
yhfX	0.16572		yfbK	0.671932		accC	0.425923		yejK	0.241475		yoaD	0.314291		yegE	0.385469		citC	0.0923037		creB	0.379614		yghG	0.50561		yiaT	0.393175		lsrA	0.145623
yjfY	0.165134		ftsK	0.671924		yfaU	0.425496		ypjA	0.241463		dmsD	0.314211		mukB	0.385285		nagE	0.0922087		rsxD	0.37951		cstA	0.505255		coaD	0.392557		glmU	0.144777
yjjI	0.164811		minC	0.669186		orn	0.424986		sodA	0.241405		ihfB	0.314083		agp	0.385142		napG	0.0921159		yacC	0.378996		yqfE	0.505148		nanA	0.392313		yfaP	0.144484
deoB	0.164637		dgkA	0.669177		ygbA	0.424515		slt	0.241373		prfH	0.31405		flhE	0.384958		mltA	0.0919122		aroH	0.378908		yfeX	0.505042		blr	0.39226		eutP	0.144438
ygdB	0.164596		paaY	0.664187		ampC	0.424502		hofP	0.241014		clpB	0.313821		amiC	0.383939		yqcG	0.0917904		rhsC	0.378767		lysP	0.504985		purE	0.391767		yjeI	0.143947
dxs	0.164576		yoaE	0.663387		hofP	0.424441		dkgB	0.240707		entH	0.313156		rsmB	0.383772		rpiA	0.0917174		yhgF	0.37805		dkgA	0.504936		yjgR	0.391763		ypjA	0.143937
ygeM	0.164307		fiu	0.661773		ung	0.424224		yjgX_3	0.240703		yfeX	0.312662		yfeW	0.383356		fliE	0.0916297		ftsE	0.377901		tsaC	0.504894		cadC	0.391658		gadA	0.143369
fumB	0.164118		gspA	0.661555		casB	0.423174		argC	0.240691		alpA	0.312643		purR	0.382501		alsA	0.0916189		secG	0.377552		sapD	0.504641		cho	0.391637		ccmE	0.143051
frwB	0.16402		narW	0.661304		fsr	0.422935		ychN	0.240612		rlmA	0.312585		ygfQ	0.382418		ispD	0.0916032		ycaC	0.377499		garR	0.504324		nlpI	0.391609		fliY	0.142446
proP	0.163765		kbaZ	0.659992		flhC	0.422492		gadC	0.240441		hofO	0.31209		chaB	0.381681		caiD	0.0915292		relB	0.377227		ddlB	0.504038		bdcR	0.391438		paaE	0.142398
yphF	0.163588		mokC	0.65796		ydcK	0.422312		ybdL	0.24027		yhgN	0.312066		melA	0.381613		yicG	0.0912426		yqeB	0.377177		yghS	0.502976		yjfP	0.391122		ampC	0.142323
cedA	0.163565		phnK	0.657169		pck	0.422069		livF	0.240224		fucU	0.311368		ydiY	0.381221		ycbF	0.0912208		zapA	0.376866		elfG	0.50186		rnd	0.390514		fecA	0.142319
ykfB	0.16355		putP	0.656928		lpxK	0.421915		yfeC	0.240171		ychN	0.311343		hemX	0.380708		yjdI	0.0912019		arnD	0.376627		ompN	0.501389		atoD	0.390512		ada	0.142231
acrA	0.163264		ompL	0.656591		ycjG	0.421815		hypD	0.239386		bcsG	0.31113		gutM	0.379861		ompN	0.0911606		hslJ	0.376372		ylbF	0.501356		ygeV	0.390378		yfcU	0.142226
eutJ	0.162967		bglG	0.65657		yqeB	0.421497		yffB	0.239305		yehY	0.310578		lpxK	0.379821		yhiJ	0.0910081		yeaG	0.376356		ybjM	0.500365		yeiG	0.389377		mak	0.141993
ybjE	0.162957		gcvH	0.654742		truC	0.421452		proA	0.239296		yjjI	0.310299		ybfF	0.379491		yfcE	0.0908775		gabD	0.376172		ydjM	0.500057		paaB	0.389233		melA	0.141917
rfbC	0.16289		ychQ	0.654735		safA	0.421315		tcdA	0.239236		grxB	0.310246		gltA	0.379168		dinF	0.0908364		pptA	0.376163		yfbT	0.499613		thiC	0.389138		proQ	0.141813
mepM	0.162821		lolC	0.652742		yciT	0.421066		yddB	0.239098		hcr	0.309869		yncK_2	0.378819		fucP	0.090762		srlD	0.375367		ssb	0.499412		sohB	0.388828		livJ	0.141376
sroG	0.162734		bcsA	0.65243		yehM	0.420808		mliC	0.238752		ybaA	0.309605		yphG	0.377865		rhlE	0.0907461		ybfO	0.374908		yfdI	0.499205		cnu	0.388744		fdhD	0.140712
basR	0.1627		caiD	0.65166		dacA	0.420079		lpxH	0.238707		ftsY	0.309573		tgt	0.37763		ndh	0.0907096		molR_3	0.374742		yciG	0.499186		ydfB	0.388448		bacA	0.140678
ydhF	0.162128		tdcB	0.648891		caiC	0.419981		paaA	0.23865		yfaS_2	0.309057		eaeH	0.377573		uup	0.090665		rplJ	0.374415		hpt	0.499012		helD	0.38778		ompW	0.140386
dosP	0.161675		pbpG	0.648831		ynbE	0.419798		ndh	0.238244		ygfM	0.308941		znuA	0.377066		argH	0.090539		insF-4	0.37418		cusS	0.498913		yqfG	0.387714		wbbJ	0.140377
secE	0.161556		gsiA	0.648163		ymbA	0.41975		yccB	0.237765		pflA	0.308916		gpmA	0.376158		metR	0.0904686		ykfJ	0.373914		rpoC	0.498676		bglG	0.38712		paaI	0.14029
apaG	0.16132		moaE	0.647688		yffN	0.419592		murR	0.237642		solA	0.308091		yfaL	0.37582		rhoL	0.0903875		rhlE	0.373761		ydjY	0.498083		yqgE	0.386571		acrB	0.139327
ecpC	0.161242		hslV	0.647443		hemD	0.419285		yibT	0.237574		slyA	0.307891		yeeE	0.374265		atoE	0.0903803		yjeN	0.37369		ydaV	0.497383		hokB	0.386203		corA	0.139088
phoR	0.161115		ppc	0.645193		mrdB	0.418921		rutD	0.237524		ndh	0.307872		ygcE	0.374068		dsbB	0.0901276		afuB	0.373177		acpH	0.497146		gldA	0.385788		dgoK	0.138768
murI	0.161108		fhuC	0.644784		proB	0.41847		purK	0.237497		sgcE	0.307203		menI	0.373497		ygeI	0.090112		hofO	0.372773		yfaX	0.497118		yaiW	0.384873		yajR	0.13863
fepE	0.161095		eamB	0.644701		feoC	0.417995		sugE	0.237252		hybB	0.307081		ygiW	0.373391		yedR	0.0900835		xthA	0.37257		yeaG	0.497022		nanM	0.384773		glxK	0.137468
hslO	0.160961		araC	0.644113		rimL	0.41763		yedS_2	0.23696		yecM	0.306656		ybdH	0.372973		ffs	0.0900186		yihV	0.372321		gsk	0.4969		ygeF	0.384412		hpt	0.137315
ygjP	0.160882		psuT	0.643006		gltP	0.416866		ybjJ	0.236904		maeA	0.306557		hemB	0.372702		idnD	0.0899702		yiaV	0.372244		ycfZ	0.496212		hslJ	0.384316		yraP	0.137238
marR	0.160798		narU	0.64123		sufE	0.416759		ftsY	0.236825		ynfM	0.306463		thiH	0.372681		gfcA	0.08995		bolA	0.372129		sroA	0.496192		dnaE	0.384072		ccmC	0.136893
dhaM	0.160735		frlR	0.641167		yfcE	0.416551		fre	0.23631		dmsC	0.306433		ygeR	0.371949		treF	0.0898457		yodD	0.372014		murE	0.496022		ydcC	0.383904		kbaY	0.136819
hypF	0.160571		yihY	0.640917		C0293	0.416502		arpA	0.236283		cstA	0.306263		flgE	0.371546		yihG	0.0898093		yfeX	0.371035		C0343	0.495567		yiiM	0.383897		entS	0.136765
hsdM	0.16023		ydhP	0.640582		yfjK	0.415968		ygjP	0.236222		yfbR	0.306093		ybeM_2	0.371235		hemE	0.0896587		atl	0.371005		rstB	0.495426		rnhA	0.383658		lolE	0.136728
ptsA	0.160211		yagB	0.639307		greA	0.415283		acpS	0.23616		yfbM	0.305931		yecN	0.371056		dppB	0.0896405		yceA	0.369844		yigL	0.494757		umpG	0.383316		ydiT	0.136482
yncG	0.160188		ompW	0.638939		vsr	0.415275		yegE	0.236097		hyfC	0.305889		gspI	0.37077		pyrC	0.0896033		amiC	0.369687		feaB	0.494487		yicN	0.382688		solA	0.136461
atpA	0.160184		uidB	0.638608		ilvN	0.41408		sodC	0.236031		yicR	0.305663		ydjO	0.370767		ybjH	0.0895308		ybjJ	0.369451		msrB	0.494315		glnD	0.382423		ybhN	0.135195
yjcZ	0.160175		nirC	0.637961		yqfB	0.413721		yfgF	0.235916		yohC	0.305318		yagB	0.370141		fxsA	0.0893806		dsrB	0.368912		dpiB	0.494168		yihU	0.382325		rpiR	0.134558
rlmN	0.160052		motA	0.637795		rpsS	0.413636		dusC	0.235793		intZ	0.305313		ydbK	0.370052		fpr	0.0893639		zntR	0.368776		sdaA	0.493755		yiaL	0.381827		basS	0.13427
leuE	0.159944		lolD	0.637727		hupA	0.413365		ytfJ	0.235773		yqiI	0.304932		nanR	0.369705		rzpD	0.0893414		umuD	0.36866		trmA	0.493377		ymdE	0.381818		eutD	0.134216
yihI	0.159762		speG	0.63593		ydcO	0.412936		ftsE	0.235561		isrB	0.304803		yehD	0.369528		cbeA	0.0893188		dauA	0.366972		csgA	0.493303		ampC	0.381618		ydhC	0.1342
yjbQ	0.159757		yfgO	0.63582		yhcC	0.412895		cheW	0.235344		tatD	0.304383		gph	0.369483		yhfY	0.0891289		phnE_1	0.36586		yqfB	0.492471		higB	0.381144		citT	0.133272
sseB	0.159318		metJ	0.635472		mdtG	0.412614		yehB	0.235267		icd	0.304182		hypD	0.369482		kdpF	0.089075		frdB	0.365546		tatD	0.491855		ycbC	0.381111		ilvG_1	0.132002
yijF	0.159181		hns	0.635022		yeiP	0.412361		argG	0.235248		yffS	0.30334		mscL	0.368783		symE	0.0890329		rraA	0.364605		hrpB	0.491227		ynhF	0.381104		flhD	0.13189
ygbE	0.15915		cpxR	0.634558		waaU	0.41193		ytjB	0.234968		ftsZ	0.303268		ygjK	0.368735		allA	0.0889777		cbeA	0.364532		xdhA	0.490796		yjdJ	0.380818		ygdQ	0.131836
ykgO	0.158911		torR	0.634388		paaG	0.41157		ymgG	0.234684		agaR	0.303157		yibJ	0.368642		ytjB	0.0888929		yjjQ	0.364435		pstS	0.490201		rpe	0.380725		wzb	0.13176
queA	0.158695		nupG	0.632905		mhpB	0.411042		yfcU	0.234492		ybaT	0.302675		yhbO	0.367976		gspM	0.0888374		yjiC	0.3642		ddpA	0.490153		yphD	0.380488		sucA	0.131663
argX	0.158076		yjbF	0.631289		ybiA	0.41026		arsC	0.234121		qmcA	0.302529		msrC	0.367792		yqiI	0.0887244		glgA	0.363929		yfeN	0.489877		ffh	0.380415		cynT	0.131506
ydaV	0.158035		fimG	0.630289		ycfZ	0.409191		tehA	0.23388		rluD	0.302094		hyaF	0.367646		rnlB	0.0885812		hisI	0.363568		sgcR	0.48951		yghE	0.379505		gltL	0.131111
gudD	0.15792		arcB	0.630022		ilvG_1	0.408437		ydiB	0.233827		yehD	0.301915		rffA	0.366754		insB-3	0.0885361		yphD	0.363436		mfd	0.489483		ythA	0.37871		ybdO	0.13111
frsA	0.157449		yidE	0.628188		phnH	0.405884		nrdG	0.233743		ycbK	0.301752		glnL	0.366659		yqeC	0.0884529		yciU	0.363216		ygcE	0.489316		mioC	0.378676		fdhF	0.130789
ytfQ	0.157413		ybjH	0.62727		cbpA	0.405671		insB-5	0.233713		ydhF	0.301458		gfcC	0.36565		hemD	0.0884397		degS	0.362842		proP	0.489065		yjfJ	0.378577		narV	0.130666
dnaX	0.157293		prpE	0.626789		elfD	0.40553		rfbB	0.233496		lpxA	0.301048		allA	0.365509		kbaY	0.088437		glmY	0.362664		yedI	0.488562		yeeW	0.378451		fadJ	0.129858
cpdA	0.15692		mhpR	0.625009		yhdE	0.405195		gstA	0.233452		ydjO	0.300876		malT	0.365341		tadA	0.0882859		ygjH	0.36198		yiaY	0.488427		amiB	0.378218		mdoH	0.129756
mnmG	0.15689		ddpF	0.623967		folX	0.405169		evgA	0.233149		tyrA	0.300846		ygcW	0.365197		yaaX	0.0880883		yedL	0.361891		ypjM_3	0.488146		dhaL	0.378075		actP	0.129738
uhpB	0.15683		ynfE	0.623308		csgA	0.404343		yhjJ	0.232782		metI	0.300593		ybjD	0.364797		yddG	0.0880397		uhpB	0.361698		xapR	0.488098		cptB	0.377481		yqhD	0.129637
fdhF	0.156771		leuB	0.622165		frwC	0.404122		ycbV	0.231898		hisI	0.300399		cusF	0.364621		ompT	0.0879731		dmsA	0.360991		rayT	0.487625		tdk	0.377467		phoE	0.129391
yobA	0.156752		sroG	0.621608		lit	0.404027		rhaM	0.231608		ygjR	0.300238		ynfH	0.364318		marR	0.0878256		tpiA	0.360839		yafO	0.487081		fdnI	0.377451		ftsB	0.129296
yibQ	0.156645		ubiE	0.620445		pta	0.403618		fliT	0.231569		phoH	0.299987		cpdB	0.363379		ryfD	0.0877586		folP	0.360199		yhaB	0.486651		gfcD	0.377219		fimE	0.129214
sucA	0.156568		eda	0.619577		pinR	0.403607		yjjB	0.231567		elaA	0.29959		hokB	0.362245		ebgC	0.0877487		malX	0.360152		ilvE	0.486482		molR_1	0.376922		zntA	0.128444
nrdD	0.156363		rihC	0.617414		dinB	0.403601		hyfB	0.231428		yibG	0.299573		kbaY	0.362225		leuA	0.0877172		rnc	0.359281		rluE	0.486446		ynjC	0.376649		clcA	0.128227
recA	0.156051		ffh	0.616215		lptG	0.403574		srmB	0.231426		folE	0.299542		glnA	0.361891		sucA	0.0877172		rssA	0.35909		ycaM	0.486262		yjgN	0.376384		phnM	0.127928
frvX	0.155804		puuD	0.615748		wbbK	0.403168		yieL	0.231274		ydaY	0.29945		xthA	0.360986		torD	0.0876078		atoS	0.357997		yaiT	0.486068		clsB	0.376104		mdtI	0.127444
yaeH	0.155767		gspB	0.615222		tktB	0.403119		ysaB	0.231097		ygdG	0.298789		rluB	0.360591		yafE	0.0875043		nadB	0.357897		rssB	0.485809		ybhL	0.375339		hcaB	0.127288
ybdK	0.155449		mobB	0.61501		ydfN	0.402221		ymfR	0.23102		potF	0.298732		moaA	0.360473		wbbH	0.087361		menD	0.357854		sfmC	0.48546		yeeT	0.374621		mhpA	0.127233
yedR	0.155365		sodA	0.611467		ybgJ	0.402042		hycC	0.230985		dnaQ	0.298583		ycjR	0.360281		yfaZ	0.0873553		mobA	0.357639		hemL	0.484584		wcaA	0.374507		ybjS	0.126565
ccmC	0.154731		ygaY	0.611308		yihV	0.401766		fecR	0.230642		mntP	0.298396		yihO	0.360146		asnC	0.0871343		ybcN	0.357482		rpsA	0.483863		fruK	0.374299		entE	0.126433
queF	0.154671		yidQ	0.609943		ymgA	0.401313		yjjZ	0.230587		phoB	0.298125		yebF	0.360065		gsiB	0.0870522		ydcY	0.357027		yciI	0.482386		csrA	0.373695		rfaE	0.125516
yheO	0.154458		rho	0.609721		rpoC	0.401259		yghW	0.230584		bfr	0.298032		yfgJ	0.360046		ydgA	0.0867561		truC	0.355429		emrD	0.482332		bdm	0.373339		ompR	0.125235
ygcW	0.15414		ybdR	0.607999		kbl	0.401202		yfcZ	0.23056		yjjV	0.297952		rodZ	0.359989		yhhA	0.0866819		moeB	0.355131		folK	0.482218		kefG	0.373216		yejE	0.124262
emrA	0.153974		crcB	0.60784		ygaH	0.40103		ybaO	0.230496		tolQ	0.297556		frwB	0.35959		yadE	0.0865416		baeS	0.354692		bamD	0.481943		ygfF	0.373197		kdsD	0.12426
ycbF	0.153654		hisF	0.607007		ylbG	0.400984		csrD	0.230442		dapB	0.297307		fliC	0.359019		glf	0.0864845		puuA	0.354608		nlpD	0.481515		glmZ	0.372739		ycjV	0.124225
maeA	0.153641		yiaT	0.606744		rbsK	0.40029		stfE	0.23034		yadE	0.297259		ompG	0.358912		fadB	0.0864742		ygeI	0.353989		hscB	0.481441		gmd	0.3725		fdoG	0.124211
mgrR	0.153524		yacH	0.605991		yjjI	0.398539		ydeM	0.229992		abgT	0.297186		ydcX	0.358789		yodB	0.0864481		menE	0.35398		nac	0.481401		setA	0.371934		allB	0.123894
sbcC	0.153515		blc	0.605984		ada	0.398341		metQ	0.229178		yfeZ	0.297029		yebK	0.358488		yhjX	0.0864229		ydiF	0.353461		dsbG	0.481025		yccS	0.371666		gntX	0.123388
bglG	0.153508		rodZ	0.605924		yfdK	0.398074		hemB	0.229016		hisD	0.297018		ubiG	0.358162		yjeN	0.086235		allA	0.352897		frvB	0.480951		glcF	0.370975		bamE	0.123329
insB-7_2	0.153377		pflD	0.604777		citC	0.396578		alaS	0.228752		entB	0.296583		yidX	0.357637		emtA	0.0861621		rnhA	0.352704		yfgD	0.479099		ygeQ	0.370211		baeS	0.12305
flgK	0.152916		fbaA	0.604733		argD	0.396265		psuK	0.228694		proA	0.296149		mngB	0.356923		pspF	0.0858667		secM	0.352487		birA	0.478972		satP	0.370151		tyrP	0.12251
fucO	0.152849		yghU	0.603888		rprA	0.395605		tsgA	0.228571		yffN	0.296035		yehB	0.356492		iraP	0.085836		ychH	0.352286		ymfQ	0.478889		rspB	0.37002		purA	0.122362
emrE	0.152718		malF	0.603672		yhdW	0.395506		yncM	0.228541		fumB	0.295759		rihA	0.356354		ybjS	0.0857692		dgoR	0.352136		mglB	0.47881		gspI	0.369923		fdnG	0.121767
hyfD	0.152664		yliI	0.602921		mdtL	0.395292		ydiY	0.228513		yjhB	0.295568		mdoH	0.35633		ypjM_1	0.0857228		mukE	0.352128		nei	0.478713		wcaK	0.369701		ade	0.121728
yfiF	0.152594		ydcO	0.6008		ykfK	0.394891		gltS	0.22777		yahK	0.295424		recE	0.355286		nth	0.0856841		holE	0.352081		dinJ	0.478709		iscU	0.369555		nrfA	0.121656
mdoH	0.152522		rpiR	0.600046		rplC	0.394556		mdoB	0.227638		ybgT	0.295276		hycB	0.355219		fadD	0.0856482		yoaA	0.351877		ymgH	0.478193		ada	0.369251		gcl	0.121355
ompF	0.152432		tauA	0.596987		murG	0.394335		fixB	0.227469		insI-3	0.295255		emrY	0.3549		ybhP	0.0855838		aegA	0.351623		purF	0.477668		preA	0.369097		ohsC	0.121121
efp	0.152334		etk	0.596703		waaC	0.394235		cysE	0.227227		hemC	0.294369		tsaE	0.354669		yihN	0.0855743		fucU	0.351136		trkG	0.477555		ccmA	0.369052		iclR	0.120912
yeaV	0.151961		pfkB	0.596128		tusD	0.39415		mltA	0.227025		pheS	0.294306		ycjW	0.35449		ygaX	0.0855447		ydgI	0.350962		rsmD	0.477281		nfsB	0.368504		ydeA	0.120823
yfhG	0.151617		ydhV	0.595713		tsgA	0.394119		nadK	0.226906		yliL	0.293922		dinB	0.35408		gspE	0.0854745		fkpB	0.3509		yejF	0.477081		mlaB	0.368452		thiF	0.120748
dusC	0.151519		argT	0.595257		mutT	0.393974		iraP	0.226702		yhfW	0.29354		ompR	0.353458		amn	0.0854502		ypfN	0.34908		ycgM	0.476388		artJ	0.368337		ytfF	0.120732
yjhX	0.151461		yeaX	0.594441		dkgA	0.393529		ftsK	0.226626		purM	0.293325		ftsQ	0.353444		idnO	0.0851469		rpiR	0.348802		yejH	0.476239		yqcE	0.368278		sfmA	0.120592
allE	0.151343		paaK	0.592704		pgaC	0.393063		yedL	0.225943		hycH	0.293296		tusE	0.352954		puuA	0.0850107		yeeO	0.348672		ybcY	0.476111		yeaV	0.367874		fliG	0.119728
lhgO	0.151255		yifE	0.59128		lpxL	0.392806		tauB	0.225935		yifK	0.293151		yccT	0.352483		hflD	0.0849289		ascB	0.348202		fecI	0.476111		rluD	0.367192		sdaA	0.118892
dcuC	0.15121		dosC	0.588859		treA	0.39267		deoD	0.225906		lsrR	0.293092		yliE	0.352155		aceK	0.0849216		yjiN	0.348134		alsA	0.47609		hycE	0.36715		yfhG	0.118844
ygiA	0.150726		ygiA	0.588688		btuE	0.392632		cdaR	0.225854		hypT	0.29305		rdlD	0.352128		ynfE	0.0849075		marB	0.347075		ytfK	0.47532		hpt	0.366763		mgsA	0.1181
clcB	0.150512		ompF	0.587598		yeiS	0.392538		napF	0.225513		pnp	0.292971		ydbH	0.352111		ydhC	0.0848851		yhbP	0.346807		kefF	0.475289		yeaM	0.366413		leuC	0.117967
ybjJ	0.150004		yohJ	0.586907		ybgQ	0.391973		ybcO	0.225357		ygaV	0.292794		cadB	0.352111		ribD	0.0847962		hisF	0.34657		yfdM	0.47498		uacT	0.365949		narL	0.117851
tdcF	0.149886		feaR	0.586617		hslV	0.391547		rplU	0.224752		yejF	0.292427		gmr	0.352012		yjiK	0.0847922		garP	0.345711		ratB	0.473245		yibJ	0.365914		puuA	0.117208
ybdG	0.149721		thiC	0.586249		yhaI	0.391349		yncG	0.224454		yihT	0.292153		fdrA	0.351676		zntR	0.0847077		yjjW	0.345088		dinI	0.473178		rdlD	0.365669		glcA	0.117068
ykgR	0.14961		rhaB	0.585419		atpG	0.391172		ybgQ	0.224246		ygaY	0.291436		amiB	0.351626		bglJ	0.0844807		ybhC	0.344626		yjhP	0.473162		glrK	0.365495		guaB	0.11694
purK	0.149395		mltF	0.583907		yajC	0.391018		frsA	0.224227		bglA	0.291299		yqgA	0.350965		yiaN	0.0844438		ytfH	0.344538		ybiU	0.472672		hofB	0.365293		lpcA	0.116669
xylB	0.149353		ygcS	0.582674		dsbG	0.390936		yjgR	0.224096		yeaH	0.291185		atl	0.350508		ykfJ	0.0844182		ybgQ	0.344504		ycaC	0.472398		ygeY	0.364238		gadW	0.116647
wcaF	0.149323		yghO	0.582328		hypT	0.390629		galS	0.223272		ycaO	0.291092		ybfN	0.349562		cpsG	0.0843889		rem	0.343937		tolR	0.472235		ynfF	0.364205		ydiB	0.1166
ynaE	0.149176		allB	0.581682		cysS	0.390451		ydbA_2	0.223192		luxS	0.290823		yohH	0.349385		yaiE	0.0843158		hcaC	0.343919		hdfR	0.471047		yfcU	0.364091		sanA	0.1162
yjgX_3	0.149099		potD	0.581091		glcE	0.390166		aspC	0.223067		araA	0.290592		glcE	0.347805		fiu	0.0841759		yehU	0.343868		micF	0.470135		edd	0.363997		paaB	0.116117
elbB	0.149005		napH	0.580923		ybfB	0.389868		tamA	0.222967		gltF	0.290205		menD	0.347729		yegQ	0.0840774		pagP	0.343353		rrrD	0.46998		rfbB	0.363815		ulaR	0.115737
yciV	0.148976		ydiK	0.579816		fecC	0.389278		ygjJ	0.222503		yihU	0.290064		abgA	0.34771		ymgE	0.0839525		ylcI	0.343		yedD	0.469943		xdhA	0.36376		yjjW	0.115565
dmlR	0.148959		bcsC	0.579193		rtcB	0.389154		dmsA	0.222427		acrR	0.28989		yfcL	0.347273		wbbK	0.0838684		trkA	0.342558		hybE	0.469838		yiaY	0.363054		sdhB	0.115301
glvC	0.148819		mobA	0.579185		iaaA	0.388658		nanA	0.222387		fimD	0.289795		chpS	0.347135		mdtJ	0.0838596		ydiR	0.34245		sgcE	0.469678		ybhU	0.363051		yqfE	0.114642
ridA	0.148712		fadL	0.579106		cyaA	0.388657		hyfI	0.222213		puuP	0.289704		cysW	0.346686		yahE	0.0837556		mlaF	0.342193		ydaN	0.46956		ydhQ	0.362757		ilvB	0.114107
obgE	0.148605		ispD	0.578934		ssrA	0.388513		exuT	0.222001		ribF	0.28969		rpoE	0.346375		ung	0.0837375		fxsA	0.342143		ybbY	0.468961		araF	0.3622		phoR	0.112998
fimI	0.14853		pgm	0.578049		hflC	0.388149		ydjE	0.221978		ryfA	0.288671		yphA	0.345232		uvrC	0.0835684		recG	0.341683		ypjB	0.46888		proL	0.362135		purP	0.112413
sugE	0.148486		fdx	0.577944		rybB	0.387882		slp	0.22184		yfcA	0.288459		atoS	0.34513		yiaC	0.0834239		mtlA	0.341673		ysaA	0.468645		dapF	0.362095		mlaB	0.11194
viaA	0.148457		gspL	0.57674		yhiM	0.387854		menC	0.221559		yjiQ	0.288094		frlR	0.345106		soxS	0.0832922		tsaB	0.34111		rng	0.468501		wbbK	0.361989		argT	0.111928
yibT	0.148243		dmlA	0.576149		upp	0.387419		argF	0.220862		gatD	0.288069		amiA	0.344958		yfdK	0.0832229		kbaY	0.34089		yeiI	0.468075		fliH	0.361811		ygiS	0.110935
yfeC	0.148103		ydeA	0.575246		relE	0.387166		gcd	0.220812		yohK	0.287969		yrdA	0.344034		fhuF	0.0830286		fadB	0.340553		flxA	0.467999		folB	0.361739		yneF	0.110451
ypeB	0.147864		xthA	0.575244		chbC	0.386074		sufB	0.220768		yjeM	0.287917		ygdB	0.343838		cysA	0.0829364		sgrS	0.339719		serW	0.46729		ttdB	0.361721		cdh	0.110324
rsmC	0.147802		rutF	0.575191		nfrA	0.385868		ulaC	0.220643		metK	0.287758		yafQ	0.343215		napF	0.0828658		leuB	0.33925		rsxG	0.466488		aslA	0.360906		lpxA	0.110166
yejF	0.147499		menD	0.574673		cobB	0.385783		qor	0.220273		ydcO	0.2876		ccmA	0.343042		setB	0.0827961		ytcA	0.338785		yhjV	0.465704		rnpB	0.360853		dapE	0.109965
yebK	0.147238		ycfL	0.574495		yhbO	0.385452		dsbC	0.220254		yabQ	0.28745		rhsA	0.342908		yjjV	0.082607		rsmG	0.338488		accB	0.465301		aldB	0.360788		kdpA	0.109714
fmt	0.146982		ynfF	0.573686		lsrC	0.385349		mdtI	0.219776		yjjU	0.287276		yhdP	0.342274		ygjI	0.082588		tadA	0.337992		ispF	0.463928		eptB	0.360468		dcyD	0.10966
ydgD	0.146778		fadR	0.57253		yiiF	0.385062		yjeM	0.219426		bcsQ	0.286488		ydjF	0.341476		mcrB	0.0824981		tfaD	0.337821		mntR	0.46389		ompN	0.360378		dmsB	0.109518
yneJ	0.14627		oxyR	0.571758		zwf	0.384873		ydhQ	0.218795		torD	0.286217		bcsB	0.340953		fklB	0.0824856		yoaD	0.337779		yfaT	0.462064		yhcG	0.36006		secG	0.109248
yebQ	0.146197		yjcZ	0.571686		ygeK	0.384634		hcp	0.218563		fadI	0.285921		mutL	0.34053		insF-4	0.0824305		appA	0.337717		ppsR	0.461464		intF	0.359718		gloA	0.109181
sbcD	0.146184		ribC	0.569004		yhgF	0.384295		yahE	0.218562		metC	0.285603		yjgM	0.340452		ybiO	0.082281		ybiI	0.337529		ygjI	0.460804		ydhK	0.359494		nanA	0.109125
yigF	0.146164		maeB	0.565759		tisB	0.384245		ymgF	0.218102		ybeR	0.285548		livG	0.33988		yfdN	0.0822582		mdaB	0.337387		hycC	0.460464		rhaM	0.359433		flhE	0.108845
waaU	0.145958		fucP	0.5656		rhaS	0.384215		fumA	0.217877		accA	0.285488		pppA	0.339762		pepT	0.0821926		yahO	0.337242		queD	0.459388		cbrC	0.359389		ybhS	0.108483
frc	0.145715		yghQ	0.565413		purL	0.384076		sibC	0.217753		yfeC	0.285256		glpQ	0.339422		ybaP	0.0821526		yohF	0.337099		ypdJ	0.458947		manA	0.359232		cadA	0.108166
ymgE	0.145664		aceB	0.565263		motB	0.383625		rpe	0.217702		bglH	0.28522		malZ	0.33929		yebZ	0.082134		thiL	0.336942		hisD	0.458847		ytfQ	0.359088		glgC	0.107925
wcaC	0.145586		oppF	0.564653		micF	0.38331		hspQ	0.217461		torS	0.284797		yohF	0.338916		nlpI	0.0820396		fryB	0.336877		moeB	0.458596		ykgH	0.358877		glnB	0.107429
hcr	0.145532		thrA	0.563489		atoA	0.382683		rsxC	0.217312		flgJ	0.284573		insC-3	0.338622		cheW	0.0818965		umpH	0.335796		mutT	0.458412		nfi	0.358577		tatA	0.1066
yecH	0.145524		yghJ	0.563054		rstA	0.381917		melA	0.217235		nlpI	0.284448		frvR	0.33829		mglA	0.0818227		eutN	0.335496		yhgE	0.458029		ybhA	0.358516		citF	0.106524
yfjM	0.145491		mdlB	0.562493		yhiL	0.381431		cvpA	0.217127		glnH	0.284378		ompT	0.338278		insE-4	0.0817281		ydaN	0.335453		yejK	0.4578		rlmG	0.357964		exbB	0.106496
ynfL	0.145367		ybgC	0.561551		yggL	0.380979		ygbE	0.217038		tdcA	0.284036		hemH	0.338201		gltI	0.0816746		gcvA	0.335368		stfR	0.457436		hofM	0.357887		fimI	0.106247
ptsP	0.145208		arnB	0.561028		fepG	0.380932		gmm	0.216857		tsf	0.284007		metL	0.338163		yfjU	0.0816214		msrA	0.335364		artJ	0.457066		lsrF	0.357693		gudX	0.106196
nuoM	0.145043		livM	0.557917		katE	0.380869		ybbN	0.216025		yjhP	0.283829		yehX	0.337982		panB	0.0815987		yifE	0.335101		yhjD	0.456673		yobA	0.357301		proP	0.105565
suhB	0.144835		cysA	0.557573		ydhR	0.380447		yfcH	0.215889		waaP	0.283607		abgR	0.336794		yieL	0.0815592		tdcG	0.334952		yiaD	0.456608		yceQ	0.357143		guaD	0.105442
ylaC	0.144646		tehA	0.557462		qseC	0.380195		rpoN	0.215732		lipB	0.283457		aroD	0.336371		nfsA	0.0814269		hofC	0.334694		hokE	0.456001		dcuC	0.356931		mdtJ	0.105359
fimD	0.144107		tnaB	0.556932		ydbK	0.379758		mhpF	0.215657		gfcD	0.283363		garD	0.336358		yjfY	0.0814092		tktB	0.334487		yhcB	0.45539		yeaN	0.35579		rcsC	0.105299
tdh	0.143868		phoR	0.556699		slyB	0.379504		ycdU	0.214224		paaZ	0.283316		nrdE	0.336229		lpxD	0.0813818		ybiA	0.334482		yiaT	0.45536		sgcC	0.355677		frdA	0.10513
yicS	0.143719		hha	0.555643		torY	0.37796		yqhC	0.214211		trxB	0.283237		hemY	0.336048		yeaN	0.0813553		entA	0.334146		yneH	0.455248		cof	0.355644		bcsC	0.105091
yceF	0.143698		napA	0.55448		gfcE	0.377706		hinT	0.21402		uxuA	0.28308		ilvL	0.335558		yeeN	0.0813484		bioF	0.33374		rlmI	0.455024		gcvT	0.355384		nlpE	0.105024
puuA	0.143691		moeB	0.553583		casD	0.377557		yhhN	0.213824		gmr	0.282161		ycjP	0.3353		dcuS	0.0813441		yedP	0.333735		hycH	0.453612		stfR	0.355264		ylbH	0.104912
rssA	0.143613		ydeO	0.552924		yjjK	0.377142		nlpA	0.213709		flgM	0.281833		lolB	0.335172		ynaJ	0.0813395		dtd	0.333593		npr	0.453285		yjiX	0.355141		csgB	0.104651
yddA	0.143538		ygcN	0.552553		rrlH	0.376957		codA	0.213422		rnpB	0.281818		pspG	0.334229		yaiL	0.0812368		flxA	0.333146		yahM	0.453222		ydeP	0.355037		ubiB	0.104542
dkgB	0.143471		argG	0.55255		nikD	0.376731		osmC	0.213369		yghX_2	0.281375		fliN	0.33396		ypeC	0.0810371		panB	0.332492		rfbX	0.453176		sdhA	0.354713		sgrR	0.104297
napG	0.14331		yegE	0.549997		dadX	0.376541		eutK	0.213177		ppdA	0.281281		ubiX	0.333788		argX	0.0809658		glnD	0.332208		satP	0.453154		recO	0.35465		lsrD	0.10405
thrA	0.143291		paaE	0.548762		minE	0.37609		bamC	0.213076		paaY	0.281269		yjaB	0.333689		ybfB	0.0808685		mpl	0.331683		bfr	0.452635		trxA	0.354514		zitB	0.103441
ftsK	0.143137		recG	0.548142		ybiX	0.375588		ydcX	0.213069		cysS	0.280969		pck	0.333107		yijO	0.0808642		ybjN	0.331383		yqeC	0.452613		ygfZ	0.352617		ndh	0.10329
rlmI	0.143085		narL	0.547387		fnr	0.375551		rplS	0.212854		yicH	0.279907		ubiD	0.332925		proB	0.0807622		groS	0.331076		ilvD	0.45197		eamA	0.352199		agaC	0.103045
csgF	0.143073		argH	0.546792		murD	0.375133		ybdD	0.21284		garK	0.279174		sroH	0.332853		sgcB	0.0806017		ompW	0.330581		yegI	0.451339		nudI	0.352193		fiu	0.103007
yqjC	0.143031		rhaD	0.546603		erpA	0.375001		deoR	0.212807		ycaP	0.278233		atpC	0.33255		yceB	0.0805243		gpmA	0.330497		ybaP	0.45104		pal	0.351969		eno	0.102704
ybiS	0.143022		spf	0.545438		C0343	0.374883		ccmH	0.212505		yddL	0.278183		ydiJ	0.332378		trmA	0.0804926		ydfO	0.33002		pstB	0.450853		fepE	0.35184		yddB	0.102554
phnN	0.142954		idnD	0.54481		fxsA	0.374846		yjjW	0.212372		acpT	0.278079		yjfC	0.331929		nanK	0.0804487		ybiT	0.329943		ascF	0.450505		agaS	0.351836		ynfF	0.101558
otsB	0.142939		fau	0.54287		arnD	0.374796		tolR	0.212283		ydhC	0.278073		yfeC	0.3316		ycaQ	0.0803997		udk	0.329153		yjiP	0.449713		trkG	0.351334		prc	0.101532
uspG	0.142902		yiiD	0.542456		sibC	0.374415		tyrT	0.212201		ygdD	0.278047		wcaI	0.331593		nadE	0.0803779		yehQ	0.329076		dmsB	0.449203		yncH	0.351159		hyaC	0.101448
mutH	0.142718		paaD	0.540809		ldrC	0.373859		yceJ	0.211995		ygcN	0.277954		ilvY	0.330581		menC	0.0803509		glyQ	0.328854		ybbN	0.448419		yjcH	0.351012		ycjP	0.101355
yhfW	0.142608		mglA	0.540691		yfgC	0.373121		hicB	0.211991		b0309	0.277815		pntB	0.330532		srlA	0.0800991		rffA	0.328828		ypeC	0.448308		yehU	0.350828		frlB	0.10095
ycgG	0.142544		nfuA	0.539867		yehD	0.373007		yigL	0.211917		alsK	0.277378		secB	0.33032		cusR	0.0800402		metB	0.32874		slyA	0.44802		yajI	0.350702		putP	0.100718
hemL	0.142441		brnQ	0.539729		yjiY	0.372756		glcE	0.211824		yegK	0.277369		cysM	0.330316		oxyS	0.0799975		ylbE	0.328472		ydjX	0.447902		ytjA	0.350597		hisJ	0.100631
ycaQ	0.142239		metA	0.539529		ldcA	0.372729		nuoC	0.211747		pbpG	0.2773		ycjS	0.330064		ykgJ	0.0799869		yicN	0.328368		isrC	0.447498		curA	0.35045		hipB	0.10043
glgB	0.141837		rutE	0.538234		grpE	0.37247		yceB	0.211681		rsmF	0.277219		mobA	0.329255		yhfW	0.0798973		gutM	0.328098		b0309	0.447164		rplK	0.349916		wzzB	0.100199
ugpC	0.141452		yciG	0.536988		csdA	0.372056		galM	0.211382		corA	0.277024		ilvI	0.329141		ynfC	0.0798857		oxyR	0.327994		pqiA	0.44673		ybdG	0.349896		ndk	0.100157
ydjN	0.141265		yecF	0.536255		ynjD	0.371733		yahM	0.2112		yicO	0.276523		cysZ	0.328962		yajR	0.0798697		galE	0.32794		gltJ	0.446383		rffG	0.349766		hemN	0.100078
uidR	0.141245		insA-5	0.536056		tolC	0.371731		ymdF	0.211101		fis	0.276454		hdeA	0.328722		nemA	0.0798218		ydgA	0.326943		prpC	0.446352		glgX	0.349438		rutB	0.0999532
yidB	0.141193		nth	0.535534		thiI	0.370997		waaS	0.211086		tusC	0.276416		sfmA	0.328595		pntA	0.0797842		yjdF	0.326835		hemE	0.445866		ybjQ	0.348507		codB	0.0998992
ssuB	0.140967		mdtI	0.534035		ykfG	0.370838		ykgA	0.210769		hscB	0.276416		lsrB	0.328437		yggW	0.0796835		rdgC	0.326758		fadK	0.445796		yfeD	0.34823		sbcB	0.0996649
ycbB	0.140864		yneG	0.532498		yjiH	0.370689		murD	0.210711		ymfS	0.276257		ymgF	0.328407		potA	0.0796387		hchA	0.326648		dsbA	0.445517		uvrY	0.348174		narH	0.0993513
yiaO	0.14076		yhhJ	0.532379		mscS	0.370683		ptsI	0.210676		yedX	0.276127		tar	0.32777		cstA	0.0796223		ymdF	0.326592		yfcL	0.445377		rimK	0.347789		frlA	0.099163
ypdC	0.140356		yigM	0.532131		yidB	0.370345		gltK	0.210598		argH	0.275921		ygdT	0.327455		mlaF	0.0795318		ygeV	0.326431		ndk	0.445211		ttcA	0.347492		nagZ	0.0987963
arrS	0.140053		damX	0.531376		rhsE	0.370291		glcD	0.210488		npr	0.275903		rlpA	0.327416		fsaA	0.0795282		napG	0.326263		yrhB	0.444695		xerC	0.347387		gspL	0.0987949
lfhA	0.140007		rutB	0.530969		ychF	0.369866		glpX	0.210305		yphH	0.275873		ilvC	0.327334		ysgA	0.0795213		fadJ	0.326062		ccmH	0.444224		fadI	0.3473		dgoA	0.0987885
yjgR	0.140004		yjhI	0.530667		puuP	0.369844		ibpA	0.210075		metG	0.275706		ykgF	0.327202		glpC	0.0792288		mngB	0.325939		fimE	0.443997		paaD	0.347257		melB	0.098784
fabA	0.139921		tauB	0.530647		yddJ	0.369791		yggT	0.209898		lpd	0.275568		yjiY	0.326741		typA	0.0792233		ybhH	0.325773		yaiA	0.443685		yeeR	0.346678		mltC	0.098432
zraS	0.139844		glpB	0.530459		ycbX	0.369762		pntB	0.209629		glgP	0.275469		asnB	0.326319		hemG	0.079223		yoaE	0.325588		yajQ	0.442889		oppF	0.346012		dppF	0.0973981
yceB	0.139741		yeiB	0.530223		yojI	0.369028		ssuB	0.209289		panD	0.275178		nadR	0.325882		flhE	0.079104		emrY	0.325396		arnC	0.44274		tig	0.345888		bdcA	0.0972934
mlrA	0.139363		fruK	0.529658		menC	0.368861		ribB	0.209175		minD	0.274856		talB	0.325841		phnL	0.0790219		rhaD	0.325321		pyrB	0.442302		ogt	0.345864		atpC	0.0969333
fliS	0.139205		mdtQ	0.527281		phoU	0.368816		ydeQ	0.208956		yaiE	0.274845		kefC	0.325575		yobB	0.078996		acrA	0.325095		chbA	0.44156		pflD	0.345736		pagP	0.0958227
nupG	0.139154		yciH	0.526746		arnA	0.367825		yadC	0.208874		fliJ	0.274602		ybaM	0.325069		yihV	0.0789594		bcsG	0.324752		lipA	0.441538		yhiM	0.345624		zapC	0.0956174
srlA	0.13899		rutR	0.526337		phnM	0.367825		yqiC	0.208382			0.274524		acrA	0.325028		ymbA	0.0789434		phnJ	0.324212		ydjH	0.441085		preT	0.345227		cysA	0.095177
yhiD	0.138855		yaiA	0.526108		yhaC	0.367712		yigA	0.208241		phnN	0.274392		flgC	0.324816		yicO	0.0788748		ygjP	0.323618		yebV	0.440862		ogrK	0.344781		frdD	0.0951518
yddM	0.138836		scpA	0.525573		cspC	0.36724		ypjC	0.208223		gspJ	0.274103		ptrB	0.324306		gnsA	0.0788661		hemX	0.32348		yccE	0.440409		malY	0.344635		ygiH	0.0950543
frvA	0.138785		narX	0.52553		ompR	0.367173		insH-5	0.207912		secB	0.27382		pgaD	0.324274		ybbJ	0.0788471		parE	0.323244		yfeD	0.440338		yqeI	0.34445		panF	0.0950523
rfbD	0.138523		chbG	0.52099		yaaY	0.366936		rrsD	0.207087		pyrD	0.273591		rnpA	0.324168		paaJ	0.0788229		ilvM	0.322859		hemA	0.440238		panE	0.343637		nadB	0.0950375
proS	0.138455		ansB	0.52045		ybgO	0.366858		tppB	0.206232		purN	0.273587		napC	0.323686		mdtD	0.078808		yhiL	0.322456		cusB	0.439733		mtlA	0.343318		hyaB	0.0949507
fhuE	0.138425		tldD	0.518632		yihI	0.366695		yciB	0.205933		puuC	0.273228		yniC	0.323282		ynfN	0.0785941		yhbV	0.322424		epmB	0.4397		ybbC	0.343189		flgL	0.0942591
focA	0.138196		fryC	0.518441		paaD	0.365188		artM	0.20586		ygbA	0.273172		yhfU	0.323132		ymfE	0.0785836		insI-3	0.32137		agaW	0.439657		arsR	0.342741		setA	0.0938192
ycaN	0.138181		yeeY	0.517251		waaS	0.364596		lysA	0.205803		aspA	0.273111		yceD	0.32276		gatZ	0.0784467		ratB	0.321177		manY	0.439024		xylR	0.34266		mhpT	0.0935511
yjdK	0.138089		mlaE	0.516469		torT	0.364305		dfp	0.205787		cybC	0.273017		bdcA	0.322328		gabT	0.078273		aaeA	0.321084		mcrA	0.438865		sdhC	0.342539		ompN	0.0934621
galS	0.13789		uxaB	0.516217		yieL	0.363907		nrfA	0.205322		dadA	0.272963		fsr	0.322276		ygiB	0.078257		pyrF	0.320597		ptsA	0.438707		ygbA	0.342329		pitB	0.0930501
ybiO	0.137828		pabA	0.515449		tsaE	0.363361		guaD	0.205255		yeeN	0.272894		nudF	0.321614		ymgA	0.0782392		gshB	0.319857		wecH	0.437848		nrdH	0.342324		mdtM	0.0924438
yffL	0.137634		hyfD	0.514386		hslJ	0.362785		mscS	0.205246		yjjN	0.272801		phnF	0.32161		rimJ	0.0782349		ybhK	0.319736		yjjL	0.437141		yigG	0.342286		mlaD	0.0922836
mukE	0.137469		yacC	0.514378		psiE	0.362783		oppF	0.205092		fabA	0.272091		srlD	0.321327		rrsC	0.0781666		infB	0.319658		galP	0.437042		mmuP	0.342092		eutL	0.092129
exoX	0.137222		fucR	0.514302		murR	0.362346		yqaA	0.204539		dapE	0.271949		mreD	0.321137		mdoD	0.0781355		insO-1	0.318571		tdcR	0.436979		emrB	0.34188		modA	0.092086
btuE	0.137193		nhoA	0.513315		ybgL	0.362268		yebZ	0.204509		hcaD	0.271604		mdfA	0.320257		yhdN	0.0780833		rbbA	0.318424		gadX	0.436792		yegD	0.34137		galP	0.0912549
pagB	0.136938		tmk	0.512028		yfdM	0.36223		folX	0.204346		ygjH	0.270803		ychN	0.320001		pqqL	0.0780611		csgB	0.318052		yehX	0.436448		cysD	0.340991		torR	0.0911789
yggX	0.136826		cbrC	0.511752		yjhV	0.361508		mnmE	0.203932		lolA	0.270095		bioD	0.319311		ymdF	0.078032		ydaV	0.317896		glrK	0.436305		yqiJ	0.340738		ubiH	0.0911087
lpxT	0.136683		yiaG	0.510513		astB	0.361002		uvrB	0.20344		waaI	0.269996		ilvG_1	0.318881		yjhU	0.0779756		feoB	0.317861		yajR	0.435945		yjgZ	0.340671		hns	0.0908444
yfcI	0.136567		rsmE	0.509984		amyA	0.360576		ssnA	0.203371		gspG	0.269636		ychO	0.318873		asd	0.0779584		ybgI	0.317793		dcm	0.435756		argP	0.340599		hycA	0.0903059
nadC	0.136322		ytfB	0.509952		menA	0.36054		fadA	0.203358		hyfF	0.26947		yodC	0.318687		ycaN	0.0778585		nagC	0.31776		ykgJ	0.43476		narU	0.340176		fdnH	0.0900761
mglA	0.136233		yciM	0.509257		frlC	0.360383		rluA	0.203277		etk	0.269216		gatY	0.31825		rcsD	0.0777826		pspA	0.317556		yciZ	0.434694		yebK	0.3399		ilvI	0.0896501
katE	0.136042		yhiD	0.508666		ybjD	0.359946		fepB	0.203258		yedI	0.269065		hmp	0.318163		pncC	0.0776458		ffh	0.317388		selC	0.434638		gltW	0.339404		glpD	0.0895456
yajO	0.136036		ybaO	0.508452		araG	0.359887		speF	0.203203		prlF	0.26868		yrdB	0.317688		glcD	0.0776337		mfd	0.317333		fumA	0.434453		ydaT	0.339151		nikE	0.0893673
chbB	0.135849		purB	0.508243		ldhA	0.359521		yaiO	0.202829		hemB	0.268538		ybaP	0.317559		ylaB	0.0775337		menB	0.317215		yhjR	0.433767		ahpC	0.339075		artP	0.0890297
cspF	0.135834		C0664	0.507907		yeaD	0.359042		leuB	0.202816		yebY	0.268042		yceK	0.317236		yjjW	0.0774981		ymgF	0.31714		arnA	0.433367		potG	0.338768		lplT	0.08885
ybaN	0.135821		glyA	0.507357		cysD	0.358995		nuoM	0.202814		molR_1	0.268036		cobB	0.31718		priA	0.0774353		dapE	0.317079		phnG	0.433365		psuK	0.337831		nikD	0.0885673
yegL	0.135691		dcd	0.506489		rlmL	0.358859		uvrD	0.202749		xanQ	0.267955		dapE	0.316982		znuA	0.0773882		yehR	0.317003		yagE	0.433125		ybjS	0.337457		gspH	0.088399
glpD	0.135474		yeaE	0.5063		nanE	0.358792		nrdD	0.202397		ybdM	0.267699		glyA	0.316446		yigE	0.0772263		araG	0.31684		yhcA	0.4327		paaA	0.337432		wcaC	0.0879818
yncK_1	0.134994		yshB	0.50621		rnd	0.358625		ybhB	0.201964		ycgH_2	0.267097		yhjC	0.316378		sfmC	0.0771775		bcsC	0.316568		ydcV	0.432494		ansP	0.337174		ycjO	0.0878369
rhsC	0.134913		mrcB	0.504049		slt	0.358473		zntR	0.201868		waaJ	0.266642		flgK	0.31627		pgpC	0.0771462		sgbE	0.316151		yeaP	0.432315		cpsG	0.33713		gfcE	0.0867011
acrF	0.134845		avtA	0.503419		php	0.358301		glcB	0.201846		frr	0.26659		yibF	0.316019		yeeR	0.0770228		yccU	0.315983		dsrB	0.431798		dcuD	0.336256		arcA	0.0863873
kdsD	0.134803		potC	0.503038		ynfG	0.358168		ddlB	0.201704		flk	0.266002		secF	0.315777		dgt	0.0769834		yjfY	0.315871		ygeP	0.431471		uspB	0.336123		aaeR	0.0862368
yjdM	0.1348		mliC	0.499865		adiC	0.358166		udk	0.201609		cysJ	0.265328		sucD	0.315576		ade	0.0769749		fimC	0.315723		yobD	0.430922		dgoT	0.336015		dnaK	0.0862111
ytfB	0.134708		mpl	0.49971		ttdB	0.357892		mglB	0.201574		astC	0.265207		msyB	0.315383		mepH	0.0769279		yneG	0.315584		yeeR	0.430733		yghF	0.335694		mdh	0.0860969
yahO	0.134586		wcaM	0.499472		hemG	0.357663		oxyR	0.201338		ydhB	0.265139		gyrA	0.315307		sodC	0.0768727		gadC	0.315556		yehI	0.430274		motB	0.335375		fliL	0.0857667
yghB	0.134258		yafL	0.499323		recB	0.356638		dacD	0.201333		gfcB	0.265081		ydcS	0.315195		C0664	0.0767995		aas	0.315374		hemC	0.429826		yieL	0.335179		yaaY	0.0856344
rhsB	0.134246		proP	0.495509		yicG	0.356631		yqjI	0.201234		gmd	0.264895		alsA	0.314808		epmB	0.076672		moaD	0.315		asnS	0.429608		yhcN	0.334747		yhfA	0.0854207
ymgA	0.13412		gutM	0.495474		evgS	0.355963		ryfB	0.201017		ycgI	0.264888		ycaM	0.31469		kdpB	0.0766489		mdtE	0.314837		hicB	0.429421		wecH	0.33455		potF	0.0852613
ycgX	0.133988		gcl	0.493688		purU	0.355509		ydcN	0.201008		pgm	0.264824		ybhG	0.314623		nuoB	0.0766087		recB	0.314502		yfiN	0.428899		yjjL	0.334469		metK	0.085148
yffO	0.133852		napF	0.49367		bssS	0.355485		ycbC	0.200923		yaiS	0.264659		mdtA	0.314507		galS	0.0765992		rnb	0.313895		lafU	0.428854		lrp	0.334207		fdrA	0.0851364
parC	0.133822		chiP	0.493551		rpsN	0.35506		rnpA	0.200789		gltL	0.264658		ydcM	0.314473		fldA	0.0765377		ytjA	0.313861		rapZ	0.428775		cueO	0.334123		ycaP	0.0847711
yfdR	0.133677		cobU	0.492727		mdoB	0.354786		ydaV	0.200448		pldA	0.264489		narV	0.314328		pck	0.0765357		ppiA	0.313621		yccU	0.428408		mutY	0.333578		ribF	0.0845313
ybfF	0.133613		mtr	0.492393		mhpA	0.354331		nudK	0.200281		yhcO	0.264406		pdxA	0.313418		ynfM	0.0765294		yjiM	0.313348		ycaN	0.428077		ykfC	0.333466		rbsR	0.0844523
yihY	0.13346		rcsD	0.492365		tyrP	0.354033		ldcC	0.200148		ycdF	0.264318		pflD	0.31339		mngR	0.076457		yidC	0.313235		yhcH	0.427952		cysP	0.332682		nuoG	0.0843819
cnu	0.133419		sdhB	0.491897		rnhA	0.353949		yedN_1	0.200144		malI	0.26419		gntX	0.312721		ynbC	0.0762863		yfdL	0.312707		lgt	0.42785		ydfJ	0.332661		dpiB	0.0839301
rlmL	0.133022		ssuC	0.489491		wza	0.353826		glgP	0.199975		hycF	0.263806		rmf	0.312623		yebS	0.0760772		hrpA	0.312027		bdcR	0.427735		yihM	0.332227		shiA	0.0839108
rhaS	0.133007		glpA	0.489167		purK	0.353797		ygdT	0.199746		yfcU	0.26333		cdsA	0.312251		ynfB	0.0760733		atoE	0.312009		glnU	0.427438		yfaQ	0.3322		hisF	0.0834109
nirC	0.133005		galK	0.487905		yafK	0.353725		wcaJ	0.199163		ydbA_2	0.263321		puuD	0.311945		sapD	0.0758316		pqiB	0.311971		rhaS	0.427297		ggt	0.332112		agp	0.0832232
pstS	0.132781		ynjA	0.484784		rrfF	0.353391		srlD	0.199132		yiiQ	0.263302		ybeX	0.311873		yohP	0.0758252		kilR	0.311789		leuA	0.427033		zntA	0.331757		nuoE	0.0831191
mdlA	0.132755		surA	0.484251		ybdG	0.352762		ybfK	0.198974		hybG	0.263273		ykgE	0.311853		flgN	0.0758103		ymgH	0.311507		yjhH	0.426401		yahO	0.331714		clsA	0.0827098
wcaB	0.132748		csgD	0.483939		ybiW	0.352311		prlF	0.198651		mreD	0.26326		ydgI	0.311732		dinQ	0.0757764		yheO	0.310566		yrdA	0.425199		ybfD	0.331644		fruB	0.0826725
ydjE	0.132554		astE	0.481656		ilvC	0.351721		rprA	0.198627		trpE	0.263258		nemA	0.311706		ygeO	0.0757234		yliL	0.310494		yhfX	0.424991		ldrA	0.329727		nikC	0.0821132
napD	0.132476		sdaB	0.480857		nanM	0.351465		paaD	0.198506		ydeS	0.26322		panC	0.31154		agp	0.0757086		ykfM	0.310366		yfcT	0.424786		thiE	0.329558		rluE	0.0820158
yagU	0.13232		adhP	0.480762		lacY	0.351424		pldB	0.198371		fruK	0.263155		aat	0.311383		yihS	0.0756805		yigB	0.310348		hemD	0.424457		queF	0.329328		yqcE	0.0819054
arsR	0.132227		yfdV	0.47914		yaaJ	0.351192		yeaV	0.198244		yfgO	0.262878		folX	0.310908		nrdD	0.0753813		yeaX	0.310151		nrfD	0.424208		mcbR	0.329106		yaiU	0.0817299
ychE_2	0.132227		purK	0.478729		ypjC	0.349116		rcnA	0.197683		galP	0.262683		rseC	0.310759		fimH	0.0752946		mngR	0.309196		yibV	0.423148		ryeA	0.329022		gntP	0.0813563
hcaD	0.132165		ada	0.47865		can	0.348096		cobS	0.196669		ytfI	0.262558		yijE	0.309565		yfdI	0.0751603		yagI	0.308996		cynR	0.423095		pepN	0.328845		cspD	0.0813148
ybcJ	0.132082		frdB	0.478454		yhbW	0.348004		paaE	0.196601		serU	0.262278		degP	0.309138		ypdF	0.0751309		dacC	0.308957		aldB	0.422969		ybdR	0.328676		ybaT	0.0812001
ffh	0.132058		ldcA	0.47812		yjjB	0.347362		nupG	0.196571		ychE	0.262263		mdoD	0.308627		ymfL	0.0750881		ftsP	0.308695		mqsR	0.422805		yoaA	0.328668		ampG	0.0810813
nsrR	0.131628		ppsA	0.477316		bglA	0.347321		sppA	0.196465		tpiA	0.262159		ilvA	0.307322		hyfJ	0.0750545		bluF	0.308434		argO	0.422251		rseC	0.328473		acrA	0.080866
hyfF	0.131551		amiB	0.4772		ycgM	0.346902		fryB	0.196445		cheY	0.262118		osmY	0.30728		yraP	0.0750094		slyA	0.307605		yiiD	0.422073		gspM	0.328453		alaA	0.0807974
yegE	0.131268		pdxA	0.476638		yjaG	0.346879		dauA	0.196173		yceK	0.261937		eutN	0.306864		slyA	0.0749453		patD	0.307503		ychE	0.421816		ynjF	0.327634		glcC	0.0807742
ydcR	0.130745		lolE	0.476535		hyfJ	0.346832		arnC	0.195975		ybdN	0.261901		murJ	0.306846		mokC	0.0749296		sbcD	0.306878		yqjE	0.420012		ymgI	0.327548		gmd	0.0801387
argR	0.130663		ydgI	0.473306		fucP	0.346649		folP	0.195969		atpE	0.26188		ykgM	0.306542		yheT	0.0749109		yqeH	0.306806		ryjB	0.419907		yafQ	0.327399		iaaA	0.0792636
yebO	0.130598		mdtK	0.473013		adk	0.34637		xdhB	0.195968		mtlA	0.261632		asnC	0.306454		leuO	0.0748898		napD	0.306797		trkH	0.419811		alr	0.327216		gcvA	0.079172
yneF	0.130534		torS	0.472948		epmC	0.346183		ygeP	0.195927		lafU	0.261331		mrr	0.306389		micC	0.0747729		rpmH	0.306327		yidP	0.419636		yigF	0.326445		sibB	0.0787517
yjcH	0.13046		yqeA	0.471351		mglB	0.344866		feoB	0.195847		fusA	0.261242		yciK	0.306316		hyaD	0.0747064		fadD	0.305689		astE	0.419624		slmA	0.326385		tatE	0.0780465
hemE	0.13043		frdA	0.471253		rplL	0.34465		ymfE	0.195802		yqaE	0.260984		dcuB	0.306308		grxC	0.0746802		rlmB	0.305621		hsdR	0.418535		fruA	0.326313		parE	0.0776339
cheZ	0.13027		fliT	0.467993		yhdV	0.344632		ydjK	0.195793		caiT	0.260979		yggW	0.306133		ddpX	0.0745615		msrC	0.305115		uidC	0.418509		yoeF	0.32622		gpmA	0.077361
anmK	0.130214		kdgK	0.467931		folE	0.344582		yjhI	0.195726		ybfB	0.260863		ascG	0.305955		ycgH_1	0.0745407		ydiY	0.304807		yfjK	0.418367		betB	0.32446		fhuC	0.0769985
clpX	0.129787		zapB	0.467853		glpD	0.344272		allB	0.195583		yjbQ	0.260832		pgl	0.305953		artM	0.0744934		rpsL	0.304399		hemN	0.417685		ygeI	0.324257		arnF	0.0769585
znuA	0.129771		waaB	0.466715		yddG	0.343841		ftsB	0.195266		rstB	0.260638		bcsZ	0.305799		ynjF	0.0744005		mscK	0.30429		potI	0.417544		ilvN	0.324256		atpB	0.0769334
seqA	0.129617		otsB	0.466307		eda	0.3437		ydjL	0.195118		flhC	0.26061		sgcE	0.305734		yniC	0.0743751		alx	0.303292		rcsA	0.417494		csdA	0.324206		ygiA	0.0764833
ycaR	0.129615		ybgL	0.466112		mutS	0.343052		tauD	0.195109		ulaE	0.260355		ghrA	0.305308		ygfK	0.0743575		ftsZ	0.303252		bglG	0.41699		ydbC	0.323828		pbpC	0.0757636
ykfM	0.129522		potG	0.4657		ndh	0.342972		fbp	0.194923		artJ	0.260299		ulaF	0.30525		ybiU	0.0743031		arnT	0.302883		ybhA	0.416866		ybiU	0.323773		ydjF	0.0757462
lpd	0.129458		nikC	0.465153		ygdI	0.34251		ydeA	0.194902		hicA	0.260234		serA	0.30479		shiA	0.074299		lolB	0.3028		ypdF	0.416826		fhuC	0.3223		rpoN	0.0755013
purF	0.129392		ribD	0.464833		serX	0.342237		rrrQ	0.1948		vsr	0.260152		ycgN	0.304615		abgR	0.0742777		ygiV	0.30211		dcuD	0.415996		rimI	0.322023		bcsG	0.0752868
ssuD	0.129253		adiC	0.461846		panD	0.342195		ycdX	0.194274		ansB	0.260109		fdoG	0.304524		cobT	0.0735132		dinB	0.302092		yqcA	0.41588		kptA	0.321778		lpxT	0.0745926
aqpZ	0.128952		yiaU	0.461117		yfcT	0.342184		folK	0.194022		ycgV	0.260081		galE	0.304179		cynT	0.0730631		purB	0.302022		baeR	0.415851		ldrC	0.321109		yacC	0.0741326
ulaG	0.1288		ybeF	0.460309		yjdL	0.342165		cbtA	0.193757		yegH	0.259519		yedW	0.303834		ilvM	0.0730209		setA	0.301975		yajL	0.415462		osmB	0.320943		glnP	0.0740686
pflA	0.128726		ddpD	0.459561		hypA	0.341907		glnL	0.193316		ykgN	0.259459		allR	0.303741		sraF	0.0729771		ada	0.301126		rph	0.415395		micC	0.320749		alsB	0.0734375
yhaM	0.128695		yraJ	0.459371		appC	0.341853		bioB	0.19277		yfcJ	0.259437		yjiM	0.303318		ytfG	0.0728737		yjgA	0.301088		yfdY	0.414944		ahr	0.320631		fryA	0.0733082
yccM	0.128677		ydeS	0.458963		secF	0.3415		hsdS	0.192757		fadD	0.259351		tauB	0.302989		fecB	0.0726989		ompR	0.300924		yidL	0.414202		yaeI	0.319623		yhjX	0.0728001
dmsB	0.128437		xseB	0.457898		ypdE	0.340986		srlB	0.192693		rplL	0.259091		ygcO	0.302726		pykF	0.072663		yadK	0.300208		thrS	0.413916		glgP	0.319586		caiA	0.0725953
yihS	0.12836		yncG	0.45614		secG	0.340306		pagP	0.192364		mepS	0.25895		ycgV	0.302432		pbpG	0.0726227		pbpG	0.300172		pspG	0.413697		can	0.319584		aspA	0.0723728
paaD	0.12802		prlF	0.456071		yghE	0.340298		smrB	0.192068		minC	0.258715		yehL	0.302113		ydfV	0.0725624		yegW	0.300138		malQ	0.413585		ynfK	0.319467		dkgA	0.0723483
torY	0.12785		micF	0.455666		ascF	0.340159		alkB	0.192004		yhaI	0.258416		yaeP	0.302111		thiC	0.0725622		ydjJ	0.299849		hspQ	0.413461		cheB	0.319395		rfaH	0.0722491
sad	0.127815		insH-11	0.455459		yegI	0.339974		ecpR	0.191895		nanE	0.258292		kdpC	0.301474		yjcS	0.0723528		ybjH	0.299839		ppdA	0.412496		yqeB	0.319156		dmsC	0.0716405
yaeI	0.127522		gudX	0.455335		ptsP	0.339645		modB	0.191829		znuA	0.258265		ubiF	0.301441		ygbM	0.0721768		yjhP	0.299726		hisA	0.412469		hemG	0.318926		cybB	0.071632
napC	0.127406		add	0.455236		alsK	0.339495		idnK	0.191448		bamE	0.258233		mreB	0.301375		yjcD	0.0720427		cobC	0.299672		uspB	0.412373		yegP	0.318917		uidR	0.0714661
arnD	0.127003		cytR	0.454926		molR_3	0.339193		qseB	0.190685		rpsU	0.25817		ratA	0.301062		ampH	0.0720019		elbB	0.299032		prlC	0.411977		gspG	0.318291		ygbL	0.0709764
yafL	0.126988		gspE	0.452636		nrdH	0.339061		ydfG	0.190491		hyi	0.25749		sodC	0.300899		ymfJ	0.0719877		cspC	0.299014		lsrF	0.411742		yeiQ	0.317656		yeaM	0.0709488
fliC	0.126601		xapA	0.45255		dedA	0.338982		cpsB	0.190227		bamC	0.25666		ytfF	0.300628		wrbA	0.0719602		sdsP	0.298335		ypdB	0.411479		eutH	0.31762		glgX	0.0707254
ybgE	0.126405		fimE	0.452378		ftsX	0.338913		fiu	0.190073		ybeD	0.256581		yeaN	0.300513		mcbR	0.0718857		narJ	0.298156		yjfC	0.411317		xanP	0.317442		qseB	0.0706723
frlA	0.126319		minD	0.451435		ybfL	0.338838		yecT	0.189946		pth	0.256529		casC	0.298982		yiaF	0.0717458		yeeJ	0.29809		atoB	0.411149		yheT	0.317227		glpQ	0.0704512
hofN	0.126236		dppB	0.451117		yagG	0.338627		lhgO	0.18975		yqhG	0.256421		nrfG	0.298877		glnV	0.0716517		dacB	0.297619		purR	0.411107		pfkB	0.316765		fliE	0.0701119
eutS	0.126117		znuB	0.451035		galT	0.338338		cdh	0.189666		umpH	0.25625		lacI	0.298601		fimB	0.0716249		yjaH	0.297245		hyaB	0.41039		fadA	0.316594		flhA	0.0700811
ddpA	0.125641		gspD	0.449556		envY	0.337633		symR	0.189567		gspE	0.25609		tolQ	0.297979		inaA	0.0715593		psuK	0.297213		dpiA	0.410373		puuA	0.316095		aaeA	0.0700092
birA	0.12564		mdtJ	0.447724		artJ	0.337596		kdpD	0.189522		ybhN	0.255937		yejF	0.297846		yagL	0.0713483		yghE	0.297099		rutC	0.408774		blc	0.314769		galF	0.0696417
sfsB	0.125574		ycdX	0.447047		feoA	0.33756		yqiJ	0.189494		alsC	0.255912		glgC	0.297463		rybA	0.0712764		btuR	0.296638		ydiY	0.408103		yfdQ	0.314621		caiD	0.0689959
chbF	0.125503		arcA	0.44383		arcA	0.337542		hybA	0.189451		rpsD	0.255695		mdtC	0.296305		mhpC	0.0712066		gfcB	0.296589		mdtC	0.407674		zapD	0.314402		dgt	0.0686266
tusC	0.125427		rfaE	0.443546		xerC	0.336618		psrO	0.189438		fabH	0.255655		yjjM	0.296254		yfiR	0.0711292		entS	0.296484		sseB	0.407342		barA	0.314231		pgrR	0.0683616
malS	0.125416		yhdX	0.443123		yfbK	0.336605		sgcX	0.189269		insK	0.255641		radA	0.296188		IS129	0.0710871		ilvI	0.296147		nudB	0.407219		pldB	0.314168		pnuC	0.0680389
ygeH	0.125342		ydcR	0.442191		leuC	0.336548		kilR	0.189119		prfC	0.255436		alkB	0.295884		tyrA	0.0710356		fhuE	0.295525		murD	0.407038		lit	0.314145		znuB	0.0679736
yjdL	0.125082		metE	0.440661		radA	0.33595		yhcC	0.189047		yccM	0.255424		fdhF	0.295468		eutG	0.0710228		yihF	0.295312		rtcA	0.406972		hemA	0.313779		phr	0.067937
phoH	0.125064		tktB	0.440532		minC	0.335881		rplT	0.188706		rbbA	0.255298		emrK	0.295455		yfdT	0.0708841		ytfK	0.295226		bhsA	0.406934		mltD	0.313489		ygbN	0.0676513
pgl	0.124994		tdh	0.437883		ygeX	0.335606		yedI	0.188489		ypjA	0.254896		guaD	0.295159		ddpD	0.0708683		dmlR	0.294625		sapA	0.406797		ybhK	0.313468		relA	0.0674576
ymfR	0.124989		fliM	0.43695		yjjV	0.335088		rrlA	0.188108		sbcD	0.254736		pka	0.295037		macA	0.0707997		b0309	0.294373		yafQ	0.406608		sfsB	0.313077		surA	0.0674042
chbG	0.124952		dgcZ	0.436795		gspC	0.334898		ynbB	0.18787		yhiM	0.25455		rimJ	0.294567		ulaE	0.0707086		ybjG	0.294363		wzc	0.406259		trpR	0.312862		lpxK	0.0671857
pgaC	0.124915		emtA	0.436512		insL-3	0.334897		hycF	0.187799		ybjJ	0.254375		fixX	0.294478		deoC	0.0706676		frc	0.294352		grxB	0.405676		yfcI	0.312861		nirD	0.0669382
yqeB	0.124682		ccmA	0.436173		alx	0.334618		ychJ	0.187706		rfbD	0.254071		yieF	0.293789		thrL	0.0706514		ybdR	0.294264		hyaF	0.405035		uvrC	0.312727		glpB	0.0655754
hypA	0.124636		ecnA	0.435817		hisM	0.334414		astC	0.187598		ybeF	0.253677		yibH	0.293612		yjcE	0.0705827		fliG	0.293965		glpB	0.404942		infC	0.312723		ygiN	0.0655148
yiiD	0.124615		ybeL	0.434409		yfcJ	0.334054		yfaX	0.187596		ydcT	0.253569		xylR	0.293236		yebV	0.0705186		tpx	0.29387		yohP	0.404934		yrdA	0.312661		ugpE	0.0650535
yddW	0.124558		tyrP	0.433792		fimD	0.333442		ftnA	0.187552		yebO	0.25351		proX	0.293112		glpQ	0.0704452		alsE	0.293396		recE	0.4045		nrfD	0.312594		paaJ	0.064968
ycjN	0.124394		acrD	0.431868		gmr	0.332601		fabZ	0.187191		ynjF	0.253256		hyfF	0.292703		ryeA	0.0704008		yfjP	0.293348		grxD	0.403984		tgt	0.31256		obgE	0.0648085
hybF	0.124308		yigE	0.431317		yhjR	0.33252		clsC	0.187035		gatC	0.25306		gabD	0.292102		frvX	0.0703782		yagH	0.293063		ybaB	0.403905		pgpC	0.312351		ydhP	0.0646417
ybbA	0.124262		rfbB	0.431162		yfjS	0.332434		fepG	0.186788		ybhC	0.25293		hycC	0.291294		yhfA	0.0700526		ves	0.292951		panE	0.403823		yhaO	0.31233		msrC	0.0643955
plsC	0.124173		pnuC	0.430389		soxS	0.331419		dacA	0.186787		panZ	0.252853		mtlA	0.29117		sroC	0.0698928		yegJ	0.292008		hypD	0.403695		rpmG	0.311997		plsC	0.0643157
rspA	0.123796		aldA	0.429441		insE-4	0.331392		glgX	0.186753		ddpF	0.252534		ynbB	0.290916		rrrQ	0.0698329		glvG	0.291248		mreC	0.403557		paaG	0.311914		nuoH	0.0642011
ackA	0.123254		speF	0.429103		mdaB	0.331168		gspA	0.186615		yhdW	0.252498		lplT	0.290912		ychH	0.0698107		alsA	0.290956		yddL	0.403284		ycbL	0.311881		mngA	0.0639324
cheW	0.123158		yddE	0.428433		yjtD	0.330776		metR	0.186435		btuE	0.252323		osmC	0.290849		purE	0.0697856		argR	0.290388		menC	0.403078		b2651	0.311827		sucB	0.0637982
yddK	0.123083		hdhA	0.427022		leuA	0.330567		tdcE	0.185669		citE	0.25113		idnO	0.29072		ompW	0.0696058		ygfT	0.290174		rdoA	0.402754		fklB	0.311472		ppdB	0.0635501
yjgZ	0.122863		yeeJ	0.426519		ydaY	0.330203		phoP	0.185534		osmF	0.250896		frlD	0.290697		yciZ	0.0694965		livM	0.289839		ydbL	0.40275		ecpB	0.311147		gltF	0.0630161
prc	0.122783		gpt	0.42626		hycF	0.330009		essQ	0.185363		pmbA	0.250861		gatC	0.290362		ygiM	0.0694249		ybeR	0.289737		lapA	0.402731		garP	0.31091		wcaJ	0.062971
can	0.122774		gmd	0.426127		topB	0.329907		yoaH	0.184671		csgF	0.250585		sbmC	0.29026		cyoB	0.0693057		IS129	0.289417		pntB	0.402405		rrrD	0.310847		ccmH	0.0624583
yahA	0.122014		livH	0.424786		eptB	0.329868		csgF	0.18467		yeiB	0.250388		ade	0.290054		yiaO	0.0693013		msrB	0.28911		ipeX	0.401731		flgD	0.310786		gpmM	0.0621822
ylcG	0.121904		yjeH	0.422651		ybfA	0.329711		radA	0.184522		yphC	0.250189		eamA	0.28994		ynbB	0.069093		tsaD	0.289041		sfsA	0.401518		mtlD	0.310261		setB	0.0615369
cheB	0.121773		uvrC	0.422008		dfp	0.329629		mdtF	0.1845		dcm	0.250182		srlR	0.289804		oppB	0.0690668		yahB	0.288891		kptA	0.401203		ompL	0.310223		nupX	0.0614737
ccmF	0.121633		yoaC	0.421712		pflA	0.329513		focA	0.184462		ugpC	0.250039		flhD	0.289642		ybaL	0.0689393		micM	0.288848		dapA	0.401183		atoE	0.310218		tdcC	0.0610061
ddpC	0.121627		proW	0.421372		ybbL	0.329464		nrfF	0.184189		queC	0.249896		yicJ	0.289428		ygcR	0.0689292		ydcU	0.288475		ygeX	0.401121		yjiM	0.309981		tatC	0.0608949
sibC	0.121544		frmA	0.419746		pphA	0.328804		sraF	0.184035		mntR	0.249601		ycgB	0.288877		hycG	0.0688429		lptC	0.288334		ycbB	0.400956		yjbS	0.30964		pbpG	0.0602188
aat	0.12138		prkB	0.418278		dsbB	0.328602		yjdK	0.183878		speC	0.249458		alaA	0.288409		yhhY	0.0688412		wcaI	0.288296		mppA	0.400767		entH	0.309288		rbsA	0.0602138
yeaJ(dgcJ)	0.121379		rnpB	0.41799		ompF	0.326809		yeeE	0.183693		yidP	0.249253		ybhQ	0.288095		ykfK	0.0687763		mukB	0.288246		ybdH	0.400426		ygfK	0.309021		nuoC	0.0602089
yqcE	0.121306		yhbS	0.417789		yaeP	0.326674		rlmI	0.18362		phnM	0.249205		ansB	0.288016		hcaC	0.0687531		flgN	0.28803		pmrD	0.400336		dkgB	0.308929		ldcA	0.0601281
coaA	0.121239		fsaB	0.417691		leuS	0.326656		ycaL	0.183308		spf	0.249115		inaA	0.287933		sibB	0.0687171		hyfA	0.287725		idnT	0.399791		gltB	0.308919		narU	0.059925
rcdA	0.121051		ybaK	0.417111		appA	0.326025		ynfO	0.18312		ghrA	0.249099		ispE	0.287892		gatR_1	0.068715		rrfF	0.28759		bcsG	0.399556		kefF	0.308888		rutG	0.0598311
ygfQ	0.12074		insG	0.416281		uxuA	0.325436		inaA	0.183108		waaS	0.248847		ycaI	0.287554		ypdB	0.0686459		fadI	0.287576		deoD	0.399062		yiiX	0.308726		pgk	0.0597085
mglC	0.120528		yodC	0.414924		yjaA	0.325099		insH-4	0.182983		sseB	0.248668		bcsF	0.287552		viaA	0.0686438		ytfB	0.28741		yqaB	0.398877		mgtA	0.308663		yjgA	0.0592746
lacZ	0.120366		fur	0.414907		sibD	0.324879		hrpB	0.182733		arsR	0.24864		fliR	0.28739		yciA	0.0686391		erpA	0.287392		pgpC	0.397562		aslB	0.308524		yjiT	0.0588741
fimH	0.120276		creC	0.414412		ycgJ	0.324532		hycB	0.182577		cheA	0.248591		hyaD	0.287259		hcaD	0.0686047		yciB	0.287237		arcA	0.397533		ascG	0.308164		potE	0.0574206
satP	0.119947		kdgT	0.413578		ybaQ	0.323551		prc	0.182457		malF	0.2477		yfaU	0.287229		tpr	0.0685965		yciK	0.287224		hycE	0.396686		yfeW	0.308005		bcsA	0.057345
yicO	0.119936		grxB	0.412979		ycjT	0.323535		yehX	0.182235		ascF	0.24766		yohC	0.287068		sucD	0.0685546		ppdC	0.287111		mrcA	0.396387		ydfU	0.307903		yneJ	0.0572788
prlC	0.11986		yicS	0.412782		ydhX	0.323532		glpT	0.182184		rsmC	0.24747		ulaB	0.286931		ycgL	0.0685051		potC	0.287083		rfbD	0.396135		mutM	0.307883		cysU	0.057274
yedJ	0.119858		mdtM	0.41212		ampD	0.323441		coaA	0.182084		rrrQ	0.247185		ampD	0.286833		nrfF	0.068494		pldA	0.286954		frwD	0.395987		upp	0.307879		folX	0.057264
livG	0.119823		mcaS	0.408742		uraA	0.323342		udp	0.181996		ybjO	0.247108		rsmE	0.286694		hyaF	0.0684299		ypdE	0.286905		mtr	0.395692		kdsB	0.307827		waaC	0.0572427
ycgM	0.119813		galR	0.408614		glcG	0.322828		ydiQ	0.181959		ybaO	0.247055		sraF	0.286331		pinR	0.0683251		yjjX	0.286236		xanP	0.394536		mlrA	0.307787		tdcG	0.0570895
ydeK	0.119688		yiiE	0.407575		yigI	0.322723		ydjF	0.181887		ebgR	0.246985		yjdI	0.28609		purL	0.0682834		flhD	0.286069		priC	0.394385		ygdI	0.307462		paaA	0.0564919
fadH	0.11968		yecS	0.407555		yhjX	0.322345		yahN	0.181808		yfhG	0.246431		sgrS	0.284598		yiaG	0.068174		wzb	0.28565		ynjE	0.394128		wbbI	0.306647		rpoS	0.056479
yhbV	0.119546		btuR	0.407164		yidC	0.322288		sdhA	0.18141		ypfG	0.245966		elfA	0.284428		cspA	0.068158		yghD	0.285413		ydiE	0.39357		acrE	0.306022		pflC	0.0557147
pfkB	0.119478		narY	0.407092		bamC	0.322287		rlmF	0.181359		yedW	0.245342		yojI	0.283773		gspI	0.0680912		rihA	0.285338		waaS	0.39333		ybiY	0.305909		ilvH	0.0555001
yhbY	0.119416		glnQ	0.406193		yihA	0.322062		flgI	0.18127		yraQ	0.245311		gltP	0.283545		hscC	0.0680407		yihI	0.285337		ycjP	0.393325		ybhB	0.305743		dmlA	0.0552614
ypeC	0.119404		pgl	0.406038		ydbA_2	0.321482		yibV	0.180264		rseP	0.245311		coaE	0.283319		yqhD	0.0680402		pqiA	0.285311		ansP	0.393269		yiaV	0.305735		hemA	0.0548902
ybgK	0.119336		melA	0.4058		ulaC	0.321461		cptA	0.179953		insH-6	0.245286		chiA	0.283002		pepN	0.0680399		yecE	0.285124		fabA	0.39277		amiC	0.305599		mdlA	0.0536856
pinH	0.119328		ygaP	0.405654		yagU	0.321404		fes	0.179952		maeB	0.244845		gsiA	0.282685		helD	0.0679947		ilvG_2	0.285095		envZ	0.392715		creD	0.305482		dtpD	0.0535092
rzpR	0.119288		mqo	0.405162		gfcA	0.321224		msrB	0.179864		yjbE	0.244667		ispA	0.282203		yqiG	0.0679918		lsrK	0.284848		znuA	0.392659		yjcE	0.305445		ytjC	0.053395
mqsR	0.119113		rtn	0.404841		yiiD	0.320675		yjbT	0.179827		ygeG	0.24457		argV	0.282077		yddH	0.0679871		ybcC	0.284295		rplF	0.392612		gabD	0.305427		yrdB	0.0533892
asnA	0.119062		folA	0.403909		eutA	0.320074		ydcY	0.179697		hscC	0.244019		ylaC	0.282027		yggC	0.0677814		yiiR	0.28396		uspG	0.392464		eutA	0.305129		dtpB	0.0533649
ybbM	0.118902		fixC	0.403342		ampG	0.320045		yiiQ	0.179594		hokA	0.243754		mtgA	0.28196		dcm	0.0676349		yebW	0.283735		yddG	0.39151		galP	0.304348		yafU	0.0532954
rsxC	0.118648		mutT	0.403086		ihfA	0.319975		mcaS	0.179588		ykgR	0.24375		purK	0.281582		mutL	0.0674481		ansA	0.283618		tonB	0.391482		ymgE	0.303981		yqaA	0.0529201
ybjQ	0.118577		fhlA	0.401952		ykgA	0.319669		rplR	0.179579		purL	0.243467		yncI	0.281575		yraJ	0.0674061		yeaO	0.283021		fdhE	0.391192		tmcA	0.303974		ugpC	0.0526213
recG	0.118474		oppD	0.40018		tyrS	0.319648		ydeJ	0.179425		yeaQ	0.243434		tyrA	0.281284		arnT	0.0673702		ypeC	0.28291		epmC	0.390953		ascB	0.303922		sbmA	0.0521602
ydiK	0.11835		cobB	0.399596		acpH	0.319223		panC	0.179085		ydgJ	0.243128		mepA	0.281049		elfC	0.0671415		yjiV	0.28287		ydiM	0.390855		yfiB	0.303852		zupT	0.0519258
asnC	0.118264		gcvP	0.399178		ydcM	0.319124		ymfK	0.178962		trg	0.242886		scpC	0.280752		fimI	0.0671294		yfaV	0.282845		citT	0.390796		yagM	0.303646		nirC	0.0515748
rprA	0.118238		yeiQ	0.398139		rsmJ	0.31891		hcr	0.178863		bioD	0.242644		fepG	0.280588		frwC	0.0671258		C0719	0.282718		fhlA	0.390784		rhaD	0.302841		yceF	0.0511314
rimO	0.118203		menH	0.397824		hybF	0.318894		yahD	0.178783		ygaQ_1	0.242564		yccB	0.280105		ycdF	0.0670637		ykfA	0.282154		yacG	0.390771		nadA	0.302554		yeiH	0.0509197
rnb	0.118065		fdhF	0.397273		mocA	0.318526		yebB	0.178607		yjjP	0.242264		nikB	0.280069		pepP	0.066951		ydhU	0.282123		ascB	0.390736		fimA	0.302184		bglJ	0.0509129
nikR	0.118053		garK	0.396938		ygfK	0.318289		dcuC	0.177975		hyfD	0.242064		cysE	0.279984		ilvB	0.0668061		mipA	0.281982		bcsF	0.389064		yceK	0.302183		xylG	0.0507145
tsaE	0.117973		phnL	0.396801		rutB	0.317397		yjdC	0.177851		ymjC	0.241883		rtcA	0.279874		pagP	0.0667388		nanS	0.281981		ftsE	0.388899		sdiA	0.302057		ssuC	0.050396
ydfX	0.117872		ccmE	0.396284		ycgB	0.317348		yneG	0.177802		gltA	0.241452		ppsA	0.279698		ynfH	0.0667297		csgC	0.28191		phnI	0.388681		gadE	0.301987		bglH	0.0503514
ydhL	0.117704		gspO	0.395634		nuoM	0.317274		eco	0.177404		slp	0.241164		yjgZ	0.279578		yfjW	0.0666776		yibT	0.281648		yeiB	0.388006		gmr	0.301927		yaiA	0.0500325
ycbK	0.117664		mhpD	0.39517		yahC	0.31713		sixA	0.177279		satP	0.240968		bcsC	0.279024		tusD	0.0666631		yhaH	0.280982		ybfN	0.387075		ilvG_1	0.301626		hybO	0.0498172
yjiJ	0.11756		rffH	0.394641		ygcN	0.316705		yccF	0.177211		yaaJ	0.240683		napF	0.279017		yjjN	0.0666284		ampE	0.280896		yebQ	0.38657		ydjL	0.3016		fliI	0.0497641
iraP	0.117393		fumB	0.39304		ompN	0.316024		hyfA	0.176761		hpf	0.240611		wzb	0.278846		tesA	0.0663445		ybgP	0.280593		fes	0.386565		dmlA	0.301586		mrcA	0.0495466
slyX	0.117366		fecD	0.392807		rsmF	0.315434		pinE	0.176603		hcp	0.240606		spf	0.278461		yhhI	0.0663376		yibN	0.280508		pka	0.386556		ygeO	0.30157		oppB	0.0495107
ldrD	0.11726		yfaU	0.39113		smpB	0.315289		b2651	0.176203		yfdY	0.240188		paaI	0.278392		yhhL	0.066336		rutF	0.280189		wzzB	0.386521		tamA	0.301502		ybjG	0.049359
acrB	0.117243		degS	0.391113		cpsB	0.315175		yjhP	0.176177		sucD	0.240178		dxr	0.278182		thiQ	0.0662982		ycjS	0.280074		ushA	0.38625		yoaH	0.30147		ydiO	0.0491698
oppB	0.117059		yafJ	0.390468		aceB	0.314907		yagE	0.176131		pgpA	0.240088		mdtJ	0.277464		insH-7	0.0662503		ypeA	0.280044		ecpD	0.385705		ykgG	0.301401		fimH	0.0491146
crcB	0.116953		secM	0.390363		yedA	0.314704		yadG	0.176068		frlR	0.240058		yecR	0.277309		ybdN	0.0661933		yaiZ	0.279842		ascG	0.384503		uxuA	0.301222		eutQ	0.0490751
gspM	0.116712		lon	0.390234		insD-3	0.314334		cynT	0.176032		htpX	0.240039		deoC	0.276966		ilvY	0.0661784		mntH	0.279162		galF	0.38178		zapB	0.301041		fimB	0.0490411
tyrA	0.116694		yddA	0.389784		mcrC	0.314062		gspE	0.175843		garD	0.239671		cpxP	0.276939		holE	0.0661417		rhaR	0.27862		rpsO	0.381403		sroG	0.300997		cspC	0.0488852
ybgP	0.116694		xylF	0.38775		clsA	0.314057		nanK	0.175777		tatB	0.239609		yghZ	0.276849		rbsB	0.0661298		sbp	0.278583		yfbU	0.381329		yddB	0.300878		yaiP	0.0487762
sucD	0.116685		atoS	0.387307		ykgO	0.313249		bssR	0.17576		ykgG	0.239577		msrB	0.276329		birA	0.0658115		yfjK	0.278432		ridA	0.381192		fdoG	0.300838		ilvN	0.0482973
fliO	0.115961		nupC	0.386684		fumA	0.312317		ubiG	0.175685		xdhA	0.239351		glvG	0.276291		ykgN	0.0655013		cysN	0.278428		ompX	0.381176		mug	0.30029		slt	0.0481842
yfcO	0.115794		yhbE	0.386631		agaW	0.312108		ykiA	0.175554		insD-3	0.239325		eutR	0.276272		gltD	0.065483		yfiE	0.278415		mdoC	0.380348		ynfM	0.30008		ygcP	0.0479987
bfd	0.115792		ybdJ	0.385795		mtlR	0.31198		hmp	0.175404		ftsP	0.239017		folK	0.275801		aspA	0.0653959		yhdZ	0.278159		wzyE	0.380236		ecpR	0.299222		csgD	0.047616
yaaW	0.11575		gntT	0.384648		fimE	0.31186		ydgC	0.175312		yhdJ	0.238483		oxyR	0.274866		thiM	0.0653667		frvR	0.277924		tusD	0.379965		eutD	0.299061		yjdN	0.0474619
polA	0.115702		ulaD	0.382546		rplF	0.311155		hemX	0.175117		atoD	0.238465		mnmG	0.274855		thrV	0.0653622		ppiD	0.277617		yzcX	0.379436		gpmM	0.298833		yehW	0.0474395
sapA	0.115658		ispH	0.381409		pdxH	0.311047		yfjJ	0.174895		ryfD	0.238403		pepB	0.274136		yzfA	0.0652931		yghJ	0.277586		flgJ	0.379189		yejH	0.298695		kefB	0.0470428
sokE	0.115434		fliY	0.381203		yfgF	0.311013		coaD	0.17489		zraS	0.238296		tolB	0.273595		yhdU	0.0652806		proP	0.277518		C0067	0.378929		ddpX	0.298693		tig	0.0467112
ydhR	0.115434		spoT	0.380601		appY	0.310853		ypdA	0.174868		creC	0.238186		wzc	0.273164		yhbU	0.0651954		wecH	0.27735		pflB	0.378117		bcsA	0.297664		dacC	0.0464013
ycfK	0.115374		fieF	0.380591		lnt	0.310749		wcaE	0.174614		gadW	0.237663		gldA	0.273163		ascG	0.0651127		nagK	0.277282		csrD	0.377844		ypdF	0.29756		fhlA	0.0462996
yfdN	0.115333		yahK	0.380349		hydN	0.310729		wza	0.17452		yqeC	0.23727		yqhG	0.273131		yicL	0.0650543		insM	0.276976		uxuB	0.377454		yfgG	0.297491		copA	0.0461195
arnA	0.115053		glpQ	0.379563		csgF	0.310579		yfaY	0.174426		sbmA	0.237253		elaA	0.272401		ypdE	0.0650416		ykgF	0.276887		rlmM	0.377191		yjaA	0.297456		fecE	0.0456827
ykgL	0.114922		appB	0.3792		frsA	0.310414		yfjP	0.174325		nirC	0.237213		ybiO	0.271951		paoA	0.0649879		csrD	0.276664		xapB	0.377056		yjbG	0.29708		mtlA	0.0455879
yhhX	0.114815		glgS	0.378945		yncK_2	0.310283		nac	0.174176		obgE	0.236686		rplA	0.27047		yeiI	0.0649171		yohD	0.276417		sdsP	0.376864		ybbW	0.297067		ampD	0.0451913
yliI	0.11475		ghrB	0.377652		rpmA	0.309943		yggI	0.174148		bcsZ	0.235779		tap	0.269987		yghZ	0.0648432		yaiA	0.276175		phnL	0.376574		yehX	0.296883		lpd	0.0448532
grpE	0.114631		fliQ	0.375371		rlmE	0.309811		citE	0.174123		ydcA	0.235753		ybgK	0.269702		aroE	0.0648034		nagE	0.275854		cysB	0.376485		hycF	0.296807		mtlD	0.0447877
yhdU	0.114487		mglB	0.375316		ydjY	0.309803		sdhD	0.173579		nadK	0.235581		ydhU	0.268903		eda	0.0647625		tsgA	0.275848		potD	0.37627		hchA	0.29627		yeiQ	0.0444247
alsK	0.114456		dauA	0.373795		fucA	0.309679		fabA	0.173571		yfaU	0.234945		hybE	0.268733		ucpA	0.0647237		yciY	0.275476		yfjS	0.375956		pgaD	0.296026		hisP	0.0441487
yrbL	0.114425		talA	0.373536		rnpB	0.309603		argI	0.173034		insN-1	0.234891		metE	0.268397		cysE	0.0645044		pyrB	0.275156		yciW	0.375353		folC	0.29581		rfbB	0.0437269
ruvA	0.114375		gatZ	0.372815		htpG	0.309036		menH	0.173		wbbK	0.23488		nuoK	0.268358		puuP	0.0645		rsd	0.275009		hipB	0.374778		ygfS	0.295711		yhaJ	0.0437002
sgrS	0.11433		yphD	0.372565		yaiO	0.308988		gspK	0.172743		ygeF	0.234803		dgoR	0.268259		mukB	0.0643758		hybE	0.274948		ydeU	0.37476		ygiV	0.295709		ompL	0.0431609
yjeF	0.114243		glpX	0.372447		yraR	0.308422		tfaS	0.172655		ydfU	0.234135		parC	0.267735		gatB	0.0643271		djlA	0.274896		hpf	0.374279		ytcA	0.295489		mhpB	0.0430159
yqhD	0.11412		hofQ	0.371107		sbmA	0.308267		rpsT	0.171872		yagP	0.234033		fryB	0.267692		atoC	0.0643229		yajL	0.274437		murQ	0.374014		yjhE	0.295444		potB	0.0429592
yhdN	0.114028		kup	0.369091		flk	0.308231		nrfG	0.171754		fhuC	0.233932		ypdB	0.267351		yejK	0.0643136		manA	0.27438		hemH	0.373655		C0664	0.294618		kefC	0.0429229
fimC	0.113887		uxaC	0.368773		yphF	0.30778		mazE	0.171731		yihM	0.233654		lhgO	0.267066		pqiA	0.0642859		gspG	0.273843		aceE	0.373532		paaZ	0.29453		treF	0.0427903
scpB	0.113779		yfiC	0.367876		gntU	0.307682		ompW	0.171452		djlB	0.233374		hscC	0.267062		chbR	0.0642445		ydeA	0.273775		mdtK	0.37322		dpiB	0.293847		mngB	0.0427254
nlpD	0.11369		nhaR	0.367469		ycaD	0.307665		moaC	0.171333		yfbO	0.233362		yehP	0.266839		ssuE	0.0641709		menH	0.27362		ycgG	0.373168		degP	0.293644		mdtL	0.0424568
dinQ	0.113254		nuoM	0.366191		yijF	0.307266		abgT	0.170934		scpB	0.233255		omrA	0.26679		ygaC	0.0641312		rmf	0.273585		cbpM	0.373094		yecJ	0.293613		yegT	0.0422388
yhfY	0.113141		yciY	0.365682		cyaY	0.306821		ompG	0.170912		rho	0.233217		yigM	0.266694		gpmA	0.0640222		rluF	0.273526		carA	0.373074		hyi	0.293301		chaA	0.0419881
yfdH	0.11309		malY	0.365011		yphH	0.306742		dipZ	0.170878		yjfY	0.232778		bglA	0.266654		iaaA	0.0638492		hcaD	0.272991		yciA	0.372999		ccmE	0.292872		lpxL	0.0419081
ynfA	0.112958		glf	0.364592		mug	0.306433		bcsB	0.170523		flgA	0.232598		gspK	0.266468		lolD	0.0637493		glnQ	0.272828		mprA	0.372986		mrr	0.292547		glpT	0.0417566
yccA	0.112865		amiA	0.364463		yhfS	0.306233		bcsG	0.170505		ybhL	0.232561		potG	0.266235		lysc	0.0635815		acrR	0.27269		yfeA	0.372898		yijF	0.292248		gcvH	0.0416074
lysc	0.112854		yceJ	0.364103		chaB	0.306081		rplY	0.170199		ddlB	0.232483		yccM	0.266136		yagU	0.0635164		lacZ	0.272344		dfp	0.372667		yqiI	0.292235		sapC	0.0413612
ykgD	0.112811		flgL	0.363739		aidB	0.305967		nirC	0.170145		yagH	0.232398		ribD	0.265696		macB	0.0634638		ybgS	0.271443		ubiG	0.372338		feoA	0.291867		ybiY	0.0408953
aaeA	0.112772		aroL	0.363231		ymjC	0.305179		xerC	0.169943		ycgH_1	0.232258		ldrB	0.265359		preT	0.0634195		ydaU	0.271414		alsB	0.371853		ymgA	0.291862		atoE	0.0403327
fes	0.112755		eamA	0.362657		nupG	0.304941		frvX	0.169822		ddpD	0.231839		ydbD	0.264967		arnC	0.0633842		ymgI	0.270924		ydhF	0.371474		narK	0.291268		casB	0.0397726
ycjU	0.11265		yjiC	0.361503		ybfK	0.304728		hemH	0.168688		yfaA	0.231718		waaF	0.264736		rtcA	0.063355		lacI	0.270876		deoA	0.371285		ydcM	0.291226		atpA	0.0393555
yoaB	0.112457		tdcC	0.361404		ppc	0.304458		hisD	0.168486		hdeB	0.231491		cysA	0.264288		csrC	0.0633108		cspF	0.270817		yheO	0.371073		kdgT	0.291176		envR	0.0393045
yieF	0.112311		fadA	0.359604		ybaK	0.304274		yjbE	0.168315		lpxP	0.231425		ybgP	0.262869		yihT	0.0632895		yfiH	0.269969		frdA	0.370542		phnF	0.29073		ycbC	0.0384302
dcuR	0.112145		dcuB	0.359566		allD	0.304071		gntT	0.168241		rpsS	0.231374		ygbE	0.262789		exuT	0.0632251		yccX	0.269969		rrsC	0.370333		yhfK	0.290336		lsrB	0.0382994
ypfJ	0.11214		ybhJ	0.359013		lplA	0.303958		ygeX	0.168124		waaL	0.231029		gntU	0.262764		apaG	0.0630902		garK	0.269859		sgcA	0.37006		yfhM	0.290231		narQ	0.0382991
yhfK	0.112117		sdaC	0.358975		ftsK	0.303613		mdtH	0.168002		gltD	0.230961		yciE	0.262064		ycbC	0.0629786		ydeU	0.269514		tktA	0.369309		hybG	0.289883		ascF	0.0379175
sufE	0.11197		lysA	0.358744		sgcE	0.303589		asnC	0.167886		phnL	0.230923		lptA	0.261794		yffP	0.0629541		ypjM_2	0.269386		yjgL	0.369023		ygiM	0.289788		narP	0.0376331
ymfK	0.111527		guaB	0.358395		fiu	0.303202		arfA	0.167855		lysP	0.230872		tnaA	0.261726		sdhD	0.0628876		cobS	0.269344		yebY	0.368987		ydiL	0.289522		trpE	0.0375555
ccmH	0.111512		pflA	0.358123		yncE	0.303135		yjgX_1	0.167798		cytR	0.230783		plaP	0.261648		emrY	0.0628185		ycjQ	0.269087		micL	0.3686		codA	0.289021		nfo	0.0372997
asr	0.111402		fepB	0.356925		yhhM	0.30274		yafE	0.167691		fliQ	0.230725		ybiH	0.261638		fadM	0.0627549		astD	0.268882		livM	0.367809		sgcR	0.288818		yaaJ	0.037167
yceO	0.111361		atpA	0.355983		yeaQ	0.302343		fecD	0.166902		yhbO	0.230692		ybeD	0.261239		cusA	0.0625625		uvrB	0.268791		yjbM	0.367553		yeeJ	0.288735		agaS	0.0370687
yihD	0.111315		gmm	0.355311		xylE	0.302021		phoA	0.166765		oxyR	0.230612		bfd	0.26083		envY	0.0624725		rbsK	0.268774		asnA	0.367378		ybcJ	0.288728		aroL	0.0356539
nudC	0.111126		sgbE	0.351778		rspB	0.301898		bhsA	0.166711		cca	0.230508		uxaC	0.260629		hyfI	0.0624637		ybfP	0.268562		nth	0.367223		cpxP	0.28866		cysP	0.0348678
yiiR	0.110864		rcsA	0.351491		glgB	0.301862		malG	0.166569		yidE	0.230437		lldR	0.260579		nrfA	0.062362		citT	0.268323		paaZ	0.366678		dcyD	0.288518		nanE	0.0344516
astD	0.110793		cynR	0.350688		arsC	0.301743		yqhA	0.166207		recB	0.230251		ycgR	0.260488		grxD	0.0622313		yfeR	0.268168		yphH	0.366473		inaA	0.288317		malX	0.0343445
nrfG	0.110779		fadE	0.34985		serW	0.301554		brnQ	0.166147		ynfE	0.2302		recB	0.260484		lsrG	0.0621419		hdhA	0.267968		gstB	0.366222		smf	0.288203		ytfR	0.0340069
yfeO	0.110631		ygaZ	0.348943		yhdN	0.301166		yaaA	0.166096		yjgX_2	0.230086		ydiZ	0.259993		ubiC	0.0621371		galF	0.267841		ryfB	0.366117		lamB	0.287713		pstS	0.0335111
purP	0.110611		parE	0.348727		ygfI	0.301128		gntR	0.166029		ycgY	0.229648		metJ	0.259823		fliQ	0.0621199		sfsA	0.26774		djlB	0.365635		yiaM	0.287401		hcaR	0.0332983
hyfG	0.110591		tdcG	0.346475		ybaO	0.300837		mepM	0.165611		tauA	0.229396		glnQ	0.25925		yicI	0.0620098		yfhG	0.267596		acrA	0.365017		dsbB	0.286953		flgN	0.0331873
ynjD	0.110503		potH	0.345584		fumB	0.3007		yheV	0.16559		mhpF	0.228806		yahK	0.259215		tldD	0.0619388		nudK	0.266919		glyU	0.364799		leuB	0.286749		fliN	0.0329523
entE	0.110193		nanA	0.345456		psiF	0.300559		ybeD	0.165525		yneL	0.228731		hslR	0.259116		yojO	0.0618614		fixB	0.266752		ohsC	0.364739		ulaD	0.286735		ptsG	0.0328172
yegQ	0.110048		helD	0.34456		diaA	0.300328		nuoB	0.165464		yigP	0.22861		yfhG	0.258939		gutM	0.0618124		menA	0.26626		ptrB	0.364674		ydeS	0.28621		phnL	0.0323286
mdtJ	0.109932		yagI	0.344287		bdcA	0.300021		phoR	0.165368		yjeI	0.228521		potF	0.258396		yihX	0.0615428		yeaD	0.266084		ytfJ	0.364673		yagF	0.285862		eamA	0.0313043
chbA	0.10985		pgpA	0.344193		dsbA	0.30001		bdcA	0.165309		crcB	0.22835		yiaG	0.258187		fimC	0.0615123		uspB	0.265835		yhfU	0.36459		ycbX	0.285802		uhpA	0.0302127
yphA	0.109817		ycgV	0.344087		pyrD	0.300004		yibF	0.165128		yraI	0.227974		hemG	0.258007		manY	0.0614681		yfdS	0.265756		yicC	0.364157		pagP	0.285413		hybB	0.0289714
ddpD	0.109681		yhjR	0.343739		ybiO	0.299987		cyoC	0.16505		stfR	0.227431		sgrR	0.257955		sufE	0.0614052		dppD	0.265543		gudD	0.363989		hycA	0.285342		thiP	0.0283632
atoE	0.10955		yddK	0.342999		hofO	0.29982		nhaB	0.164856		b0725	0.227405		fhuF	0.257954		ydjY	0.0613509		ygcU	0.265492		brnQ	0.363798		yjhG	0.284914		plsX	0.027596
ilvM	0.109265		pssA	0.342809		hemX	0.299751		galE	0.164722		can	0.226877		yjiR	0.257931		ykgD	0.0613488		fdoG	0.265378		eda	0.363768		ynaJ	0.284525		gloB	0.0274862
pqqL	0.109201		dmsA	0.341575		dpiB	0.299656		kdsA	0.164463		yfdV	0.226489		ftsN	0.257663		yjaB	0.06134		Phantom Gene	0.264999		eutS	0.363479		rfaH	0.284471		bhsA	0.0270593
yejK	0.108717		crp	0.341016		pbpG	0.299603		idnD	0.164367		intE	0.226363		ybgC	0.256936		yffB	0.0611348		nrdG	0.264874		fumB	0.363169		cbtA	0.284143		wzxC	0.0269718
ybhM	0.108396		gatC	0.340885		hisD	0.299336		rsxA	0.164347		yafO	0.225852		ydfJ	0.256473		yeaX	0.0611335		uspE	0.26465		ymgE	0.362249		yhcF	0.284068		xdhB	0.0268133
bamA	0.1082		phnM	0.340845		yoaA	0.299086		map	0.16407		tdcB	0.225846		ndh	0.256102		cycA	0.0610541		ptsA	0.264356		yegL	0.361808		mdlA	0.284056		fimG	0.0260718
rlmG	0.108094		gyrA	0.340411		ybbA	0.298969		hyaF	0.164023		ydiS	0.225519		exbD	0.254777		tbpA	0.0608896		yaiX	0.264193		gspA	0.361715		carB	0.283925		cdd	0.0254388
ybiV	0.108031		wzyE	0.340105		osmF	0.298961		flhE	0.163967		ucpA	0.225399		kdpB	0.254035		tyrT	0.0608706		pspG	0.263868		yfcD	0.361704		yedQ	0.283672		yecN	0.0252044
xerD	0.107978		nemA	0.338767		yccJ	0.298735		eamA	0.163577		actP	0.225379		pepN	0.253913		yiaA	0.0607441		yicJ	0.26376		bdcA	0.361115		yabI	0.28366		fadI	0.0251671
ybaO	0.107966		ilvA	0.338681		alkA	0.298685		yrbL3'	0.163419		atoS	0.22477		eutT	0.25354		frlB	0.060633		yhdE	0.263694		ubiX	0.360739		fhuB	0.283471		araF	0.0250991
emrY	0.107913		guaD	0.338297		fieF	0.298534		lafU	0.16341		insH-9	0.224641		ssuE	0.253256		ahr	0.0605836		gspJ	0.263618		ydcX	0.360694		yegL	0.283071		yehU	0.024522
ycfT	0.107903		betT	0.33768		yceH	0.298324		fliR	0.163308		yjjX	0.224432		rhaT	0.253073		ydfO	0.0605387		yffN	0.263188		yiaO	0.360597		yjbF	0.282097		allC	0.0244534
maeB	0.107748		hypT	0.337404		mqsA	0.298012		insB-7_2	0.163278		nikC	0.224314		yjeH	0.25283		dsbA	0.0603646		ydgK	0.262477		ycjS	0.360384		yaeB	0.281798		dppB	0.0242832
rutD	0.107744		hybB	0.336085		ybdJ	0.297823		sulA	0.163222		yadS	0.223675		blc	0.252681		tusA	0.0602937		ampD	0.262282		loiP	0.360312		yidI	0.281782		yadN	0.0240554
yoaG	0.10771		fimI	0.333936		yidD	0.297458		yihF	0.16305		lipA	0.223275		rhlE	0.252444		yciV	0.0602704		bdcA	0.262226		ybfK	0.360191		grcA	0.281497		yhfK	0.0237148
yjjA	0.10769		yraR	0.333471		pgsA	0.297358		ycgB	0.162742		gspH	0.223183		feoB	0.251877		mlaB	0.0601275		ybaY	0.26154		dinG	0.360157		yghR	0.281239		iscA	0.0234586
yneL	0.10732		ggt	0.333105		panZ	0.297219		csdA	0.162578		glgC	0.222891		apaH	0.251739		sokB	0.0600627		rbsB	0.261093		yjgN	0.360148		basR	0.281132		speB	0.0233673
acrZ	0.107215		srlB	0.332766		rydC	0.297034		chbF	0.162559		aat	0.222873		aslA	0.251585		yjfN	0.060042		yeaE	0.261047		glmM	0.35946		tsaB	0.281128		aaeB	0.0233555
zntA	0.107215		rbsB	0.33247		mtn	0.29678		coaE	0.162489		hdeD	0.222854		marC	0.251397		hydN	0.0599724		fliI	0.260667		yfbP	0.359256		ygaQ_1	0.280998		modF	0.0220612
gadY	0.107117		nrdH	0.332283		elfC	0.29669		recJ	0.162247		tyrR	0.222754		hypT	0.251085		hdhA	0.0598646		yqjA	0.260644		phoA	0.358698		yneH	0.280816		yegL	0.0214978
allC	0.107039		malT	0.331737		ybhL	0.296668		torZ	0.162128		pntA	0.222685		plsX	0.250956		aes	0.0598578		fsr	0.260261		ygbI	0.358459		greB	0.279373		atpE	0.0212561
yfjK	0.106941		exbB	0.331423		yiiQ	0.296659		yihP	0.161562		agaI	0.222655		tnaB	0.250934		alaC	0.0598534		mhpR	0.260121		rusA	0.358211		yiiF	0.279121		gss	0.0208516
ypjK	0.106794		waaU	0.331089		glyU	0.296619		fxsA	0.161543		gsk	0.222266		pgrR	0.250751		psrO	0.059804		wzxC	0.260039		yjjG	0.358023		C0067	0.278922		sdhC	0.0204376
acs	0.106781		wzxE	0.33053		gapA	0.296572		hslJ	0.161477		kptA	0.222208		pbl	0.250378		uspG	0.0594654		fucK	0.259877		msyB	0.357925		ydiE	0.278752		deoB	0.0203263
tpiA	0.106781		dkgA	0.330109		yahF	0.296536		IS129	0.161408		rplW	0.222044		yfgM	0.249478		efeB	0.0594447		yihT	0.259352		yehA	0.357858		efeU_1	0.278364		treC	0.0201783
tdcA	0.106612		fliL	0.328601		yqiH	0.296517		recE	0.161291		insE-4	0.221033		frvB	0.248469		ascF	0.0594322		cybB	0.258936		ybiA	0.357466		psrO	0.278321		frwD	0.0192834
thrL	0.106583		gltL	0.327925		gspF	0.296311		yedW	0.16112		adk	0.221032		aslB	0.248052		fimG	0.0593579		gmr	0.25852		gadC	0.357398		paaX	0.278298		yjjJ	0.0191662
ftsI	0.106566		bioD	0.327228		yihX	0.296236		yaiT	0.1609		proS	0.220777		bfr	0.24799		yjjY	0.0592793		citX	0.25769		flgH	0.357092		rpmD	0.278129		cra	0.0190485
hypC	0.10635		wcaJ	0.326757		fsaB	0.296234		ybcM	0.160758		rcsA	0.220492		wbbH	0.247931		ymcE	0.0591772		tehB	0.257608		ompC	0.356559		ylaB	0.277847		frdB	0.0190479
dppB	0.106262		cusR	0.324687		mnmG	0.295681		ttdR	0.160687		ykfA	0.220308		ychF	0.247872		pflA	0.0591355		tfaS	0.256744		fimD	0.356514		coaA	0.277709		pflD	0.018953
cynT	0.106254		dxr	0.324093		aslA	0.29469		yfiC	0.160546		aroH	0.219832		gpmM	0.247681		sdaA	0.0590665		degP	0.256415		cysN	0.356228		tilS	0.277197		asmA	0.0184925
guaC	0.106189		setB	0.32406		insH-5	0.294207		yicH	0.160374		pstS	0.219339		ryhB	0.247596		ampC	0.0590539		mreC	0.255911		ybgK	0.355846		yeaQ	0.276824		ydgA	0.0179196
yeeX	0.106182		ndh	0.323669		spf	0.293996		ridA	0.160204		ygjJ	0.219192		phnG	0.24745		yaiU	0.0590491		kdsD	0.255834		yaeI	0.355046		fdx	0.276578		oxc	0.017657
ygaC	0.105999		sfsB	0.323373		yneL	0.293952		yijD	0.16019		ybaP	0.218899		bisC	0.247364		plaP	0.0588725		uxuR	0.255226		malS	0.354897		nth	0.276357		udk	0.017313
tbpA	0.105975		yjfM	0.321777		fucU	0.293894		nudJ	0.160167		ybhI	0.218804		yaaY	0.247333		sroH	0.0588206		nadE	0.255089		fldA	0.354882		cbrA	0.276238		sufE	0.0171203
livM	0.105898		dcuA	0.321157		fdnH	0.292821		fliY	0.1601		ybhA	0.218749		yieK	0.24732		paaG	0.0586907		ompF	0.254791		recB	0.35336		mdoB	0.275715		fecB	0.0168594
cmoB	0.105876		pncB	0.321043		livH	0.292701		eutH	0.159996		cspD	0.218731		znuB	0.247289		yecN	0.0586464		dicA	0.254709		cdaR	0.353218		yphF	0.275594		abgR	0.0168515
arcZ	0.105809		ygaH	0.32011		xylH	0.292479		fhuE	0.159752		phnK	0.218684		hokA	0.24725		yjdJ	0.0585877		sfmF	0.254508		tatA	0.353012		yecC	0.275593		rnhA	0.0162058
aroF	0.105747		yraK	0.319882		artQ	0.292444		insH-9	0.159642		oxc	0.218669		yihL	0.247243		gpmM	0.0585681		nikB	0.254074		relB	0.352541		asnC	0.27522		gcd	0.0160571
ygfS	0.105689		mepA	0.31981		sufA	0.292396		ynjA	0.159551		insL-3	0.218096		cyoD	0.247042		gapC_2	0.0585418		agaV	0.254014		yjeJ	0.352184		leuC	0.274821		pppA	0.0160058
ybgS	0.105307		caiA	0.319433		crcB	0.292051		yjiP	0.159508		ffh	0.218077		mmuM	0.2453		sgcA	0.0585399		yjgL	0.253665		mdtI	0.351752		eco	0.274634		cobB	0.0155292
yliL	0.105128		bisC	0.319003		mngR	0.291815		yfjZ	0.159396		fau	0.218063		cstA	0.244619		argK	0.0584254		rnk	0.253624		nuoM	0.351649		flgM	0.274546		ybaL	0.0152611
xapB	0.104411		alr	0.318977		solA	0.291769		sfmD	0.159235		yrfG	0.217882		ccmG	0.244439		proQ	0.0584101		ppiB	0.253342		groS	0.351378		prfA	0.274506		uhpT	0.01526
yqaE	0.104386		gdhA	0.318949		bglG	0.291706		lsrA	0.159066		yeeO	0.217805		ydiQ	0.244329		rutR	0.0583803		ybcY	0.253194		ebgC	0.350692		ybjH	0.274135		fliP	0.0145143
yhhI	0.104323			0.317853		ymfQ	0.290976		lptD	0.158991		galF	0.217701		rng	0.244265		yhdP	0.058367		yjeO	0.253027		glpF	0.350129		mglB	0.274053		glpF	0.0144375
thiD	0.104123		pagP	0.317342		mdtE	0.290875		ycfL	0.158918		nrdR	0.217677		yebC	0.24411		pdxK	0.0583423		yajI	0.253018		rffE	0.349637		yhaC	0.273648		flgC	0.0136192
yjhV	0.103922		yebC	0.315866		rhtC	0.290803		ybjQ	0.158911		dinF	0.217464		dppC	0.243599		yhiS_1	0.0583049		ykfL	0.252732		torR	0.349357		yccF	0.273239		trpR	0.0132409
yghG	0.103846		frwC	0.313574		mhpE	0.290712		gatZ	0.158882		yehU	0.217116			0.243403		ybiV	0.0583002		phnG	0.252141		paaY	0.349309		mdtI	0.273026		mscL	0.0132371
fdoH	0.1036		trkH	0.311046		mukF	0.290564		thiH	0.158818		ycaI	0.217092		gpsA	0.243351		ydaN	0.0582621		cspE	0.251575		rstA	0.349046		idnO	0.272934		nirB	0.0130143
phnI	0.103551		ebgA	0.310057		tdcC	0.290307		avtA	0.158716		cysI	0.217021		narY	0.243213		ygiS	0.0581858		ydaG	0.251247		yhbP	0.348759		pinR	0.272818		yedJ	0.0129789
ysgA	0.103451		katG	0.309939		talA	0.290305		arnA	0.158714		rutR	0.216913		fpr	0.243173		fepG	0.0581528		ilvL	0.2507		yihU	0.348341		yjcF	0.272775		lsrF	0.0120508
uhpC	0.103058		tpx	0.308614		sucC	0.290141		acpT	0.158629		prc	0.216744		ygfM	0.243094		puuC	0.0581267		yjjZ	0.250647		frdD	0.347897		qseC	0.272461		metC	0.0118484
dsdA	0.102967		yjhD	0.308208		yidE	0.290085		ydcA	0.15857		ybhG	0.216196		narJ	0.242585		gnsB	0.0580478		sapD	0.250444		rhsD	0.347824		scpB	0.271922		nhaB	0.0118442
ftsH	0.102964		chaC	0.307627		prpE	0.28978		ydgI	0.158515		kduD	0.215987		prpE	0.242449		yghW	0.0579179		livJ	0.250386		ygaY	0.347477		bglF	0.271834		fsaA	0.011795
yafO	0.102837		ebgR	0.30696		trmA	0.289126		yebS	0.158342		ompC	0.215862		hupB	0.242354		yafJ	0.0579002		glgC	0.250147		lexA	0.347456		epmB	0.271635		livF	0.0114401
ypaA	0.102322		trxB	0.306147		narU	0.289122		ybhA	0.158331		ykgH	0.215517		yheO	0.242347		ydhQ	0.0578481		codA	0.249597		nhaB	0.347001		cysM	0.271491		rhaR	0.010963
glpQ	0.102111		mhpA	0.305748		sdsQ	0.289081		cbeA	0.158325		rpsK	0.215312		hcaR	0.242295		ygcE	0.0577235		cusF	0.24947		ybgE	0.346857		lsrA	0.271486		mdtA	0.0107002
yadN	0.102026		ryfB	0.305426		yceI	0.288822		rpoE	0.15814		ulaF	0.215083		flgM	0.241882		uspF	0.0575301		ubiC	0.249358		alkB	0.346111		tatA	0.271138		secD	0.0104437
pdxJ	0.101887		zntA	0.305299		garD	0.288088		yphE	0.15803		proM	0.214822		uspC	0.241595		gadE	0.0572504		insH-5	0.249327		yliF	0.345762		dadX	0.270631		bioH	0.0104027
pqiA	0.101792		yhcD	0.305184		ydfU	0.287941		maa	0.157914		waaA	0.214806		yrfG	0.241234		ydaQ	0.0571087		cysA	0.248711		yjcB	0.345268		bglA	0.269742		exuR	0.0101459
hybB	0.101777		pldA	0.304581		nepI	0.287879		uxaC	0.157799		secG	0.214642		pepE	0.241174		yjhP	0.0570809		atoB	0.248554		pldA	0.345042		ybgD	0.269559		prpR	0.00998877
fdrA	0.101642		flgJ	0.302246		narQ	0.287859		eptB	0.157789		gudD	0.214596		tonB	0.241095		flu	0.0568905		yiaJ	0.248442		ydiL	0.344446		wcaC	0.269501		tmk	0.00970614
fabH	0.101629		pitA	0.300852		arnF	0.287209		rpmB	0.157698		nei	0.214529		yeiR	0.240574		prpE	0.0567864		lsrB	0.247986		ileS	0.343841		ugpB	0.269423		ygcN	0.0096521
rhtA	0.101437		fdnI	0.299665		aegA	0.286963		thrL	0.157119		idi	0.214235		fbp	0.240277		kdpC	0.056781		frwD	0.24792		ccmA	0.343616		yfcP	0.26915		ybgF	0.00964759
yheT	0.101366		prpC	0.29966		puuA	0.286733		nagA	0.157105		deoA	0.214233		agaR	0.240179		yfbM	0.0565683		wzc	0.247679		ycbK	0.343469		ydiV	0.269056		flgA	0.00929079
yhfS	0.101141		rhaR	0.298191		ycjN	0.286635		yigF	0.157092		hcaT	0.214114		metF	0.240074		ybeX	0.0565464		entH	0.247153		atpI	0.341724		ynbD	0.269043		cysG	0.00866911
yecT	0.101105		yohK	0.296391		ygiS	0.286346		dppB	0.157072		idnK	0.214101		proY	0.239795		rbsR	0.0565451		poxB	0.247074		ynhG	0.341389		yieH	0.268296		lacZ	0.00860533
ndh	0.101032		crl	0.295722		cpxR	0.286324		arnD	0.157036		cydA	0.213988		tas	0.239094		entH	0.0565015		ribE	0.246982		ymbA	0.341242		amn	0.268231		mmuP	0.00802363
rhaB	0.100726		yhfK	0.295548		cdaR	0.284347		tauA	0.156944		dfp	0.213593		tpiA	0.238818		yicS	0.0564694		glrK	0.246973		rnpB	0.341187		ygjK	0.268166		bglF	0.00797374
rrfG	0.100483		yjjU	0.295493		srlE	0.28368		eutG	0.156874		glyS	0.213573		wbbJ	0.238793		nikB	0.0564255		rrsH	0.246652		frr	0.341116		ydgK	0.267908		gspI	0.00764452
nemR	0.10042		modA	0.295382		rihA	0.283552		rimO	0.156796		yagG	0.21344		ydcR	0.238338		nanS	0.0563533		yjiA	0.246351		menE	0.341058		yaiY	0.267713		gspM	0.00737075
glcC	0.100394		fliF	0.295281		lysA	0.283255		metN	0.156633		pgsA	0.213346		rpoS	0.238171		metB	0.0563418		yobA	0.246338		htgA	0.340986		proY	0.267643		torC	0.00602133
flhA	0.100217		ycaL	0.294898		arfB	0.283126		can	0.156474		talB	0.213167		malK	0.23801		sdaB	0.0562916		yibV	0.246131		marC	0.340798		dacC	0.267479		ftsY	0.00567478
yafS	0.0998453		narI	0.294373		ribC	0.28231		cadA	0.156218		fruB	0.21282		entS	0.237848		cybC	0.0560753		rpmF	0.246063		ecpR	0.340793		rtcA	0.266987		sapF	0.00543662
ychG_1	0.0998356		shiA	0.291413		yohF	0.282182		nikA	0.156217		ynjA	0.2128		yjhX	0.237842		carA	0.0560442		ilvH	0.244873		yfhH	0.340779		fimH	0.26673		atpG	0.00530555
yajG	0.0998224		acnA	0.291268		hycH	0.281826		ptsA	0.156043		fliC	0.212646		cmoB	0.237548		yhbQ	0.0560138		yeiP	0.244704		cydC	0.339664		selA	0.266445		cpdA	0.0051235
ansB	0.0996915		htgA	0.289633		rplS	0.281232		hofO	0.156005		ydiT	0.211958		panB	0.23725		yfjR	0.0558062		msyB	0.244214		relA	0.339288		aldA	0.266056		rhaB	0.00507952
ypdA	0.0995823		atoE	0.289248		yahN	0.281157		fliO	0.155987		yjgR	0.211636		kdsB	0.237158		ygfF	0.055672		yjtD	0.244046		xseA	0.339097		ybfG	0.265502		potD	0.00380888
tusA	0.0995092		rcsF	0.289203		ldrD	0.281085		yigI	0.155686		mscL	0.211492		argP	0.23712		osmB	0.0556274		argH	0.244011		ycbC	0.339042		gfcB	0.265383		ddpX	0.00357374
ybcM	0.0994955		cfa	0.288585		lacA	0.281054		frdC	0.155518		rtcB	0.211342		yrbL	0.2371		maeA	0.0552969		ulaB	0.243731		ccmG	0.338747		mdtD	0.265255		wcaM	0.00355556
mltD	0.0994747		chbR	0.287261		mdtQ	0.280889		ydjN	0.155271		ytfF	0.211129		cysB	0.236934		asnB	0.0552228		lomR_1	0.243163		ydcM	0.338675		cmk	0.265087		clcB	0.00339627
rffM	0.0994631		mrcA	0.286755		ydcT	0.280489		sraB	0.155171		ypjC	0.21112		relB	0.236921		xylA	0.0552042		xylR	0.242895		ptsP	0.337661		yhfA	0.265041		ttdB	0.00290567
nfrA	0.0994525		yebQ	0.285851		yihO	0.280283		csiE	0.155158		insO-2	0.211055		seqA	0.236598		yghJ	0.0551793		artJ	0.242416		yoaI	0.337384		cas1	0.264868		fepD	0.00286775
yfiN	0.0992243		phoU	0.285368		uup	0.280183		gltF	0.155032		ilvN	0.211051		iaaA	0.236365		cspD	0.055151		b2651	0.242205		queC	0.3373		srlE	0.26441		metQ	0.00278213
phnO	0.0985998		tatA	0.285186		tyrA	0.279804		ybeZ	0.154952		ccmC	0.211044		csgD	0.236199		yhdW	0.0550554		rimK	0.24203		yaiO	0.337122		ndk	0.264396		ushA	0.00276876
ilvG_2	0.0985772		aroF	0.284478		amiA	0.279566		dgcZ	0.154559		lolB	0.210905		btuF	0.235934		dsrB	0.0549401		rsmE	0.241411		secE	0.33685		ahpF	0.264384		galK	0.00226352
nikA	0.0985719		yrdD	0.283448		yzgL	0.278771		psiF	0.153772		yncK_2	0.210565		yjjX	0.235932		ymfT	0.0549236		dgoA	0.241079		ycjY	0.336443		hcaF	0.263237		nfi	0.00210469
ycfS	0.0983912		rydB	0.283347		trkG	0.278716		ygfB	0.153648		uhpA	0.210458		hisA	0.235842		ygjJ	0.0549197		yhdU	0.240779		yjjK	0.33642		yhhW	0.263178		fdoI	0.00142241
yedW	0.0983827		araG	0.282712		cysN	0.278704		rpsI	0.153366		tesA	0.210317		argF	0.235364		yddL	0.054888		sohB	0.240765		allD	0.336316		ynfC	0.263036		hisM	0.00127831
yidI	0.0982193		yggR	0.280729		amiD	0.278587		rdlC	0.153187		dsbC	0.210311		alx	0.235281		gspK	0.0548191		tam	0.240756		yicJ	0.336294		ysgA	0.263013		ddlA	0.00121051
flgM	0.0981344		poxB	0.279243		hypB	0.278349		dedD	0.152846		ygcP	0.210287		bdcR	0.235227		yfcA	0.0547887		ypfH	0.24059		ybeR	0.335868		ycfT	0.26266		allS	0.000693386
ygdI	0.0980159		frvA	0.278691		ispD	0.27825		aldA	0.152737		ompX	0.210226		caiD	0.234987		citX	0.0545803		fsaA	0.240575		rnpA	0.335803		aroE	0.262558		ydhJ	0.000371825
bcsZ	0.0979169		ybfN	0.278439		ybfP	0.27814		gspL	0.15267		xylB	0.210002		yciN	0.234689		yehU	0.0544537		ycgN	0.24051		yebT	0.335491		ssrS	0.262487		nhaR	0.000186646
potH	0.0978001		gss	0.278317		cysG	0.277916		yfdP	0.152599		barA	0.209968		apbE	0.234638		ybiB	0.05429		aroC	0.240404		tbpA	0.335347		yneM	0.262424		flhC	0.000133365
patA	0.097689		yghZ	0.278266		pheT	0.277823		napB	0.152594		aroB	0.209905		ygeV	0.234389		eutQ	0.0542882		fucR	0.240298		hypT	0.335303		gntX	0.262373		hemC	4.64723e-05
pykF	0.0975508		gpp	0.277448		ivy	0.277679		ynfK	0.152566		yhiJ	0.209755		ydaF	0.234368		uvrD	0.0542692		cysH	0.239226		tyrR	0.335295		dhaM	0.262366		preT	-0.00131396
yqeH	0.0973314		crr	0.277183		ftsH	0.277567		yaiS	0.152466		yahL	0.209596		garP	0.234354		ybcO	0.0542026		ppiC	0.239193		sbp	0.335021		zur	0.262358		ycgV	-0.00167495
aldA	0.0972328		proB	0.276664		hicA	0.277388		pepQ	0.152302		pyrF	0.209491		mcbR	0.234333		ptsH	0.0541859		zapD	0.239152		yfcQ	0.334846		eutB	0.262181		hcaC	-0.00200358
metB	0.0971836		melR	0.276036		ybjT	0.277239		nagZ	0.152281		atpH	0.209377		yegK	0.23425		zitB	0.0541397		flgE	0.238911		acrD	0.334732		speC	0.262055		frlD	-0.00205519
rpiA	0.0969569		frdC	0.274755		glpE	0.277234		hemD	0.152007		tsaC	0.209111		narW	0.234149		uidB	0.0541032		lyxK	0.238695		yjgR	0.334436		ycjN	0.261692		pssA	-0.0021023
ecpD	0.0969286		ulaR	0.274698		cobC	0.277202		potH	0.151777		yqeH	0.208788		aegA	0.234083		ltaE	0.0540689		ynfK	0.238515		mliC	0.334373		hisJ	0.261634		gltJ	-0.00210743
ratB	0.096717		yadD	0.273457		yfaP	0.277147		yjhF	0.151615		yqiC	0.208473		menH	0.233812		tas	0.0539367		yejG	0.238366		slyD	0.334323		araE	0.261504		gpsA	-0.00232158
cspH	0.0965804		nikD	0.273013		ybbJ	0.275722		hslU	0.15142		yggS	0.20799		mlaB	0.233517		ybdO	0.0539077		tp2	0.237915		ytfR	0.334061		yedI	0.261455		rfbD	-0.00242638
tyrB	0.0964974		artP	0.272576		bioD	0.275608		ilvM	0.151266		mutY	0.207947		ampE	0.233485		yiiM	0.053891		yraJ	0.237832		lpoB	0.333911		yghQ	0.261405		yddM	-0.0030236
ccmA	0.0964085		allS	0.271764		yicS	0.274916		recQ	0.151014		msrC	0.207748		yibL	0.233216		cmtA	0.0538428		rcnA	0.237735		tdh	0.333279		bacA	0.261172		ftsL	-0.00334002
wzzE	0.0961629		ygbL	0.271074		yoeF	0.274119		puuB	0.150947		wzyE	0.207742		yhjX	0.233041		orn	0.0537319		mtlD	0.237585		bfd	0.333179		pgpB	0.26077		glgA	-0.00334846
hflK	0.0961554		entA	0.269549		phnI	0.273275		ykgF	0.150816		fhlA	0.207714		fldB	0.232741		sad	0.0536448		viaA	0.237424		efeU_1	0.332749		yjhX	0.260233		pheP	-0.00374604
yfdS	0.0961206		yaaJ	0.268763		yafT	0.272626		gspC	0.150722		poxB	0.207685		atpD	0.231933		rssB	0.0536234		tus	0.237399		chbR	0.332477		cyoD	0.260144		fabF	-0.00400951
cptA	0.0961081		uxaA	0.268628		ccmD	0.27237		ubiF	0.150679		flu	0.207644		tig	0.231064		yhdZ	0.0535579		lptG	0.237179		Phantom Gene	0.332347		pspB	0.260077		csdA	-0.00455376
copA	0.0960155		yicN	0.26846		cueR	0.272114		ypdB	0.150545		ssuA	0.2075		aaeA	0.230956		yifN	0.0534786		yecA	0.237092		gcvR	0.332262		ybaO	0.259731		fdhE	-0.00491092
rplL	0.0957906		yejG	0.267677		yibH	0.272018		insA-5	0.150175		yhbU	0.207459		yifL	0.23093		ynaI	0.0532818		rsmB	0.237078		gntT	0.331761		cpsB	0.259465		yfeO	-0.00495421
lit	0.0957533		iaaA	0.266675		hycE	0.271566		yidA	0.149933		paaJ	0.207437		rlmJ	0.230855		azoR	0.0532689		putA	0.237069		eutA	0.331642		yjcB	0.259167		ybdM	-0.00521061
pdxY	0.0955299		yehU	0.266159		bsmA	0.271562		gcvR	0.14982		hyfA	0.20732		cheZ	0.230757		narY	0.0532392		phoQ	0.23692		yebK	0.331499		ribD	0.259143		cysB	-0.00563097
yfbN	0.0953624		lacY	0.266044		soxR	0.271469		yfgM	0.149737		yccT	0.207193		frlB	0.230566		mcrA	0.0532388		rng	0.236702		hisS	0.33127		rimJ	0.259066		pitA	-0.00596945
dacA	0.0952906		glnP	0.265859		tdcA	0.271315		hslV	0.149628		araJ	0.207102		yjhI	0.230466		sdsR	0.0530637		hyfI	0.236534		pgsA	0.330705		fabR	0.258944		fumC	-0.0073806
yfcZ	0.0952815		potA	0.265045		yedS_2	0.271184		yfgJ	0.149593		yceH	0.207043		mipA	0.230455		gltP	0.0530453		livG	0.236446		thiQ	0.330413		yhdY	0.258917		lpxM	-0.00764293
gspD	0.0952217		malE	0.265001		nagZ	0.270456		yiiE	0.149497		ybcM	0.206843		glnD	0.230162		cof	0.0530086		ftsI	0.235781		yfeC	0.330183		fliN	0.258747		hofQ	-0.00820857
bax	0.0952174		ryjB	0.264202		fadL	0.270433		rhaR	0.14942		nlpA	0.206739		ykgN	0.230094		cdd	0.0529104		appB	0.235482		yjdA	0.329631		lipB	0.258604		betA	-0.00845664
bfr	0.0951937		satP	0.262423		hyaF	0.27031		ybiT	0.14936		C0343	0.20643		ycbB	0.229825		yajL	0.0529102		yegK	0.235436		lpcA	0.329631		dtpB	0.258352		thiD	-0.00852861
epmA	0.0950504		yahN	0.262401		sufC	0.269811		putP	0.149177		fimH	0.206406		ykgJ	0.229228		mutS	0.0528933		thiM	0.235377		sibD	0.328607		ybjD	0.257907		ugd	-0.00860203
nrfB	0.0949204		yaaU	0.261342		dinF	0.269553		arcZ	0.149112		dnaE	0.206389		yecA	0.228242		insO-1	0.052859		mdlA	0.235367		ychF	0.328004		hspQ	0.257601		sdhA	-0.00883767
thiF	0.0948334		glcC	0.260666		mprA	0.269473		yaiU	0.14906		ybjQ	0.206021		mdaB	0.228075		agaC	0.0528093		C0293	0.235033		rfbA	0.327835		deoB	0.257508		mcaS	-0.00965682
glmY	0.0948327		yiiM	0.260637		mioC	0.269281		mdtC	0.148898		yeeD	0.205944		yhbU	0.227623		yciQ	0.0527813		yjaB	0.23503		bglX	0.327723		ydbK	0.257362		rhtB	-0.00971774
fsr	0.0948294		dsbB	0.26018		focA	0.269276		chbC	0.14873		ybiO	0.205452		yfaE	0.227269		secF	0.0525958		gadX	0.234712		caiF	0.327593		ybeD	0.257352		fepA	-0.0097326
scpC	0.0947683		thrB	0.258914		psrO	0.269224		cusA	0.148717		torT	0.20505		exbB	0.227165		yahG	0.0525807		ddlB	0.234527		yiiX	0.327505		ydhV	0.257092		zraS	-0.0101378
ydaS	0.0943866		fepG	0.258322		rybA	0.268939		yfjK	0.14862		arnC	0.204968		nagE	0.227106		glpB	0.0525595		ydcC	0.234515		cpxA	0.327479		mcaS	0.256981		artI	-0.0102055
ydeJ	0.0942541		ispG	0.257132		yqeG	0.268735		ygjV	0.148489		rimI	0.204847		avtA	0.226956		ydjN	0.0525525		ymfQ	0.234133		yrfG	0.327446		yebW	0.256218		nrfG	-0.0102226
abrB	0.0941679		hcaB	0.256975		tp2	0.26862		malQ	0.148413		deoD	0.204759		kup	0.22691		amiB	0.0525391		yqcC	0.23409		ycgJ	0.327389		csgE	0.256158		aidB	-0.0102939
agaW	0.0941349		lpp	0.255893		dusA	0.267613		yfeW	0.148272		ryfB	0.204491		uxaB	0.226446		fimE	0.0524341		glcD	0.233877		flhA	0.32691		wzxC	0.256115		amiB	-0.0106748
yiaC	0.0941109		glmS	0.255338		manZ	0.267442		xylB	0.148169		safA	0.204314		yiiQ	0.226077		ymgJ	0.052341		mdlB	0.233412		ddpC	0.326505		creC	0.255945		yecA	-0.0120649
yjdN	0.0938531		mepS	0.25528		gspM	0.26664		casD	0.147851		mreB	0.203937		prpB	0.2251		ycfK	0.0522284		ydbL	0.233408		yhdZ	0.325655		atpA	0.255688		manA	-0.0122607
agaA	0.0937631		malK	0.25444		nhoA	0.266144		mdh	0.147815		exbD	0.203526		ygjI	0.224638		yfaU	0.0521594		lhgO	0.233054		yffB	0.325181		fliT	0.255657		yceG	-0.0123545
gsiB	0.0937312		soxR	0.253931		uhpB	0.2658		yahO	0.147794		wbbL_2	0.2033		mraY	0.224587		tatE	0.0521377		yddL	0.232898		dhaR	0.324992		aegA	0.255463		ygeV	-0.0123935
rplY	0.0937138		allA	0.253363		yfdT	0.265784		yqeC	0.147758		menB	0.203258		yiaO	0.224467		tyrU	0.0520877		yjjM	0.232604		yqiG	0.324964		ubiA	0.254983		frdC	-0.012691
xapA	0.0935425		folE	0.251623		ypdF	0.265702		nfi	0.147538		murE	0.203239		dmsA	0.224085		cysM	0.0520626		envC	0.232598		galK	0.324936		pflC	0.254808		ompG	-0.0132203
ypjM_3	0.0935324		lysc	0.251504		pstB	0.265694		speC	0.14744		narK	0.20314		pspC	0.223618		cysZ	0.0520263		nfuA	0.232314		dkgB	0.324864		btuF	0.254776		sbp	-0.0133314
mdtO	0.0932956		ribB	0.250987		ldcC	0.265595		aegA	0.147096		rsuA	0.203031		bamE	0.223428		ybgF	0.0519526		trkH	0.23182		yiaN	0.324742		cysK	0.254761		uacT	-0.0134106
plsB	0.0931645		rfe	0.250788		tyrR	0.265547		pncA	0.146975		leuC	0.202901		yegU	0.22313		hyaB	0.0518732		potA	0.231642		rnk	0.324507		xanQ	0.254661		mpl	-0.0136301
lrhA	0.0930793		iscU	0.249578		ydfJ	0.265413		tfaD	0.146841		eamB	0.202679		puuC	0.222813		ydbD	0.0517237		sapC	0.231397		yeiW	0.323779		arnE	0.254395		dapD	-0.0141171
csgA	0.09305		pgk	0.248591		ddpC	0.265147		lplT	0.146784		livJ	0.202643		prlF	0.222791		napC	0.0516594		nrfG	0.231249		livK	0.323393		yohK	0.254307		lolD	-0.014155
proC	0.0929876		kefB	0.248582		sfmC	0.264752		proK	0.14669		intD	0.202366		rssA	0.222593		eutB	0.0516476		mepH	0.230997		yciU	0.323167		narZ	0.254217		cynX	-0.0151435
patD	0.0928837		trpR	0.247974		cydD	0.264569		ygjH	0.146673		ycaK	0.202285		sbp	0.222257		fdrA	0.0516253		livF	0.230969		ydiJ	0.322991		ybcF	0.254009		puuE	-0.0152651
higB	0.0928588		glmY	0.247155		ydhQ	0.264499		yegD	0.146593		frmR	0.202228		paaE	0.222244		yqiK	0.0515707		yacL	0.230944		sohB	0.322131		rfbX	0.253824		manY	-0.0152941
ydhS	0.0928585		IS128	0.245945		yebK	0.264445		dgoT	0.146463		pssA	0.202145		nrdG	0.222025		tyrB	0.0514911		ydcK	0.230685		purU	0.321928		def	0.253605		rpiA	-0.0153261
waaA	0.0925903		ycaC	0.245119		bcsB	0.264325		hisJ	0.146316		yraH	0.202055		topA	0.222021		gudX	0.0514891		torZ	0.230527		rhaA	0.32192		ychE	0.253436		yohC	-0.0154966
fecI	0.0925359		yigL	0.244112		lsrK	0.264242		pheL	0.1463		glpB	0.202045		frdC	0.221572		waaZ	0.0514878		recJ	0.230478		ytfA	0.321609		sspB	0.253421		yhfT	-0.0162287
malF	0.0925088		metQ	0.243124		yfcH	0.264221		puuA	0.146109		glyU	0.201875		nrfF	0.221537		tyrV	0.0513527		yraI	0.230351		xanQ	0.321116		perR	0.253155		feoB	-0.016622
yadG	0.0923821		mtgA	0.243079		yicJ	0.264125		truC	0.145898		yifE	0.201798		tdcG	0.221166		hofN	0.0512912		hofB	0.23005		gmk	0.321053		mraZ	0.25295		amiA	-0.0173958
yqcA	0.0923012		mtlR	0.241179		ydiT	0.263566		flxA	0.145627		ppa	0.201792		yceJ	0.220714		ygcN	0.0512554		sfmC	0.229662		hypC	0.32069		yjbQ	0.252778		priC	-0.0175436
lacI	0.0921801		nuoC	0.240694		yiaU	0.263522		ytfE	0.145255		yiaV	0.20176		lptC	0.220446		yfeY	0.0512451		mrp	0.229553		yedS_3	0.320573		hycG	0.252635		wzxE	-0.018426
abgT	0.0920748		uvrY	0.238855		hicB	0.263204		yiaY	0.145236		yigL	0.20154		ybbA	0.220282		nfrA	0.0510854		yahA	0.22951		hflK	0.319301		narY	0.252523		btuB	-0.0184514
eutB	0.0919953		bdcR	0.23662		yadH	0.262278		proQ	0.145066		ygfB	0.201116		yfdG	0.219866		yjjP	0.0510726		yhgN	0.229087		secF	0.319277		entA	0.252506		ybhL	-0.018491
hcaT	0.0919355		caiT	0.235713		gspE	0.262257		yeaN	0.144955		uidA	0.201063		yhaH	0.219738		yfgJ	0.0510413		astE	0.22875		asnW	0.318597		dapB	0.252397		rpiB	-0.0184957
garR	0.0918617		modB	0.235194		ybcI	0.261902		dpiA	0.144926		bssR	0.201019		ytfG	0.219537		yaeP	0.0510142		yjgX_3	0.228137		fhuD	0.318411		cusR	0.252317		ybgL	-0.0188884
yeaM	0.0915591		sfsA	0.234899		yfaQ	0.261835		ispG	0.144852		appB	0.200533		hyaB	0.218801		pspE	0.0509266		yjfJ	0.22811		ybaV	0.318284		yjfF	0.252247		yidP	-0.0189233
idnD	0.0915463		aroC	0.234585		ssrS	0.261595		ligB	0.144802		paaG	0.200475		rihB	0.218479		ybhR	0.0509041		mcrC	0.227848		ybfB	0.318235		yfcO	0.252174		ugpA	-0.0197552
kefF	0.0914645		yehY	0.234575		nudC	0.261502		aroL	0.144593		rydB	0.200173		hisF	0.218279		ppdD	0.0508527		mdtJ	0.227792		zapA	0.318171		pmbA	0.252127		yjjL	-0.0202295
ugpB	0.0914015		fepA	0.230433		thyA	0.261262		yehU	0.144393		yahN	0.199522		yjgA	0.217372		rsmA	0.050813		potI	0.227636		ybhQ	0.318075		cynT	0.252097		ulaB	-0.0208169
secA	0.0910032		wzzE	0.229996		secB	0.261165		rbsA	0.14412		phr	0.199458		yihD	0.217233		ulaD	0.0507532		argK	0.227547		yhcN	0.318046		yciG	0.25201		nuoK	-0.0208504
cysW	0.0908304		gadC	0.227415		fdhE	0.26116		yecC	0.144054		yafY	0.199377		xapA	0.217171		glyU	0.0507385		sixA	0.227489		ybjJ	0.317568		cheA	0.25194		agaD	-0.0213078
yfeW	0.0906834		cpdB	0.226801		uspF	0.261043		ynfN	0.143918		cbpA	0.199082		lrp	0.217074		yagP	0.0507236		yajR	0.227306		purL	0.317058		yqeA	0.251806		yhbS	-0.0214458
tcdA	0.0906218		rffA	0.226558		ybbY	0.260784		yciE	0.143848		yhdX	0.199031		gspD	0.21688		srlE	0.0506646		dedD	0.227189		ydhC	0.316738		glnE	0.251774		tpiA	-0.0215611
gmd	0.0905884		codA	0.22628		holA	0.260706		csgD	0.143784		minE	0.198913		yjjU	0.216788		cyoC	0.0506424		aaeX	0.226738		pepT	0.31666		pdxJ	0.251247		ftsX	-0.0228494
yhjB	0.0903659		glnB	0.225337		ydeS	0.260324		fucI	0.143649		dinG	0.19868		rbsB	0.216591		fsr	0.0506073		gloB	0.226497		ybcI	0.31623		prpE	0.250631		ydfJ	-0.0228538
mltB	0.0902521		mscK	0.224763		gspK	0.259856		umuC	0.14353		allC	0.19863		tbpA	0.216401		ybeM_1	0.0505749		yjhQ	0.226117		mrcB	0.316069		ydeO	0.250564		caiT	-0.0230237
yicL	0.090225		yjfK	0.224562		ymgG	0.259791		paaX	0.143291		cysG	0.198582		csgB	0.21628		yedA	0.0505202		hslR	0.225434		yiaV	0.316037		arnD	0.250506		tolB	-0.0232991
ldrB	0.0901678		cobT	0.220389		gutM	0.259302		nohA	0.14324		eutL	0.198435		sfmC	0.216184		yehS	0.0504646		ohsC	0.225246		ymfS	0.315913		efeO	0.250423		gatC	-0.023419
thiQ	0.0898866		umpG	0.218979		yjfF	0.259291		pyrC	0.143238		yhdZ	0.198409		fre	0.215949		tqsA	0.0504574		cdaR	0.22522		pyrI	0.31498		aas	0.250279		oppC	-0.0237088
menD	0.0898529		thrL	0.218688		yahH	0.258379		ybjX	0.142971		ybgJ	0.198336		yjjJ	0.215804		yfhL	0.0503604		nudJ	0.225131		ychN	0.314887		ybaS	0.250149		aceF	-0.0239441
yigM	0.089795		eutE	0.218074		yecC	0.258131		cysB	0.142869		srlA	0.198301		paaJ	0.215577		ydfE	0.0503387		focB	0.224995		mdtP	0.314802		cobT	0.249962		tehA	-0.0244806
yjhP	0.0897645		fryA	0.217396		argO	0.257754		rpmH	0.142747		mrdB	0.198236		yaeI	0.215569		ydaG	0.0502875		xylB	0.224934		mhpR	0.314461		lpxT	0.249706		acrF	-0.024595
srlE	0.0896505		yddM	0.217224		nadC	0.257736		ydfI	0.142673		yjdK	0.198139		appB	0.21532		yfeC	0.050284		ptsG	0.224878		ttdT	0.313951		nagK	0.249653		srlB	-0.0245972
fepG	0.0894634		yadG	0.216757		ppiD	0.25756		ytfR	0.142582		exuR	0.197991		thiF	0.215278		rseP	0.0501938		fabH	0.224751		yojO	0.313919		astD	0.249543		ydcS	-0.0265756
rfbB	0.0892608		wcaK	0.216532		yjgX_2	0.257331		hyaB	0.142526		dnaX	0.197711		yneJ	0.215265		ybiH	0.0501441		oppD	0.224374		yqcE	0.313293		lafU	0.249408		cydC	-0.0275491
pflD	0.0889671		ahr	0.215743		dcuC	0.256741		ygiH	0.142518		ygiB	0.197394		yhdX	0.215153		garR	0.0500833		mobB	0.22416		ydeO	0.313228		gltK	0.249376		fliH	-0.0291763
ubiD	0.0887581		ecpA	0.215587		ygdB	0.256609		elfC	0.142179		bdcR	0.197199		wcaB	0.215054		glvC	0.0500671		cmoB	0.22411		fryB	0.312701		btuR	0.248802		fadA	-0.0297843
feoA	0.0887162		flhC	0.21549		fdhD	0.25637		yeaX	0.141903		smtA	0.19708		ychQ	0.215039		yhcM	0.0499327		caiD	0.22384		kdsA	0.31266		mdoC	0.248663		pabC	-0.0299153
yojO	0.0886588		eco	0.215352		yiiG	0.255276		rihC	0.141838		yfaW	0.19692		glrK	0.214686		endA	0.0499245		nudE	0.223667		rpsP	0.312592		tbpA	0.248348		pspC	-0.030932
mmuM	0.0884009		phnJ	0.214269		fixX	0.254853		yacC	0.141806		sgcB	0.196759		uspF	0.21458		ydhV	0.0499038		znuC	0.223189		ylbH	0.312444		nac	0.248348		rffD	-0.0310407
slyA	0.0882993		obgE	0.213309		araH	0.25481		ykgN	0.141788		arcB	0.196345		atoE	0.214554		dgoR	0.0498985		rssB	0.223075		nfuA	0.312294		serC	0.248231		purU	-0.0311155
secF	0.0882945		hisP	0.213109		ydfG	0.254741		pntA	0.141754		yjiR	0.196073		yfgO	0.214517		hybF	0.0498367		zapB	0.22302		sppA	0.312252		yeiB	0.247787		bcr	-0.0314648
ygaH	0.088192		lpxM	0.212561		yfcO	0.254658		glnK	0.141698		yeaK	0.195779		tatE	0.21437		yraQ	0.0497287		xylG	0.222927		pdxJ	0.311632		cysZ	0.247728		gatR_2	-0.0320835
hypD	0.0881682		speA	0.210786		yaiA	0.25406		xylF	0.141605		wcaL	0.195655		ybcN	0.214263		gspD	0.0497098		hokE	0.222895		eamA	0.310947		lptE	0.247627		focA	-0.0324676
sraB	0.0878647		nrdR	0.208763		ygaQ_4	0.25403		ygiQ	0.141548		ybaL	0.195652		psiF	0.213869		C0719	0.0494686		yidK	0.222851		phoU	0.31017		otsA	0.247577		potC	-0.032631
idnR	0.0877891		zntR	0.208598		ssuD	0.253789		ynaJ	0.141383		qor	0.195498		alsK	0.213331		insG	0.0494406		ycaD	0.222533		ybcM	0.310095		wzb	0.247371		ynjC	-0.032869
pinE	0.0877		ppdB	0.208459		ynbB	0.253721		cbpM	0.141352		hipA	0.195448		mhpF	0.212949		yggI	0.0494236		yejA	0.222329		typA	0.309495		fieF	0.246493		lptF	-0.0335747
eyeA	0.087585		exuT	0.206525		ychO	0.25372		paaJ	0.141258		yjjG	0.195415		evgA	0.212877		ydiS	0.0494039		rna	0.222267		yhdW	0.309032		tadA	0.246175		dauA	-0.0339381
yaiS	0.0875824		tesB	0.206193		ybiT	0.253673		pepT	0.1411		fliD	0.19531		rhaR	0.212725		rdlD	0.0491426		ssrA	0.22224		xisE	0.308859		emrD	0.245992		mokC	-0.0341158
rnpA	0.0874525		pal	0.203606		ydiN	0.253517		b0100	0.14089		ydiU	0.195263		dpiA	0.212524		yegJ	0.0489932		ydjA	0.222105		ddpF	0.308847		tatB	0.245736		frr	-0.0341536
yfbU	0.0874219		nirD	0.20335		cspD	0.252943		rybB	0.140546		gmk	0.195194		gss	0.2122		rdgC	0.0489928		csrB	0.222064		pldB	0.308741		yeaJ(dgcJ)	0.245547		yafL	-0.0342113
yghF	0.0874146		dut	0.202421		dctA	0.252705		yihS	0.140489		nadR	0.195088		nlpE	0.211919		gph	0.0488743		rfbA	0.222062		pncC	0.30774		cra	0.244938		ptsA	-0.0344149
melB	0.0870996		arnC	0.201591		rpsA	0.252681		ftsW	0.140306		yagJ	0.194981		srlE	0.211433		dtd	0.0488017		fbaB	0.221945		hcaE	0.307208		waaJ	0.244903		ansB	-0.0354362
fadK	0.0869853		nrdD	0.200414		cspE	0.252583		rsxG	0.140068		hemG	0.194774		ompC	0.211365		ccmC	0.0486613		yjhU	0.22138		ompL	0.306801		smpB	0.244677		potG	-0.0363369
ispG	0.086816		gspH	0.200349		rcsF	0.252406		yhjV	0.140064		ybjP	0.194347		rdgC	0.211319		yhcF	0.0486213		rffE	0.220924		asnC	0.306509		clpX	0.24457		sdaB	-0.0365795
yfaL	0.0868053		yeiG	0.198428		yidI	0.252286		pflA	0.139853		feaB	0.194294		gnd	0.211117		msyB	0.0485803		osmY	0.220455		ydbH	0.306471		nuoI	0.244287		ubiA	-0.0371516
yhjV	0.0865746		agaD	0.196926		rsmD	0.252218		lptB	0.139697		yggM	0.193759		casB	0.210876		ycaP	0.0485476		ycjR	0.220354		yjfF	0.306276		dcrB	0.244118		tag	-0.0379274
avtA	0.0864736		emrE	0.196548		qseB	0.252031		rplQ	0.139456		nrdH	0.193345		sucC	0.210766		yodD	0.0484678		ygeP	0.220314		ycjX	0.305979		bcsQ	0.243161		gntK	-0.0380638
puuC	0.0863654		folP	0.196232		ytfK	0.251589		trxC	0.139158		yiiG	0.193278		cra	0.210584		slyD	0.0484041		ybjD	0.220195		malT	0.305595		hsdM	0.243135		ubiF	-0.0382289
yhbW	0.0862448		fliE	0.195765		atl	0.251448		yjfL	0.139143		bamA	0.193228		chbB	0.21045		yegZ	0.0482191		yobB	0.220037		pyrG	0.305561		nrdE	0.24291		lldR	-0.0385863
ycbJ	0.0861955		fimH	0.195241		tmk	0.250709		sgrS	0.139048		atpG	0.193099		yfcC	0.209891		mgsA	0.0482189		yebZ	0.21993		bglF	0.305534		ygcW	0.242888		mdoB	-0.0388729
fiu	0.0861419		hemH	0.193532		ulaF	0.250519		cirA	0.13891		amyA	0.192723		basR	0.209666		hybE	0.0481732		yfcC	0.219909		mscM	0.305495		yieE	0.242863		ybaY	-0.0392231
bamD	0.0861356		ynjC	0.192852		glnA	0.250319		deoA	0.138868		ybfQ	0.192694		hycF	0.209513		phnD	0.0480631		ycaK	0.219868		pbl	0.305299		pnp	0.242108		creC	-0.0394727
ydbC	0.086134		trpB	0.192556		fadM	0.249383		cspD	0.138725		pgaC	0.192345		yfcF	0.209061		glrK	0.0479904		yfcG	0.219286		yffM	0.304334		kup	0.241896		dacB	-0.0409366
arfA	0.086108		adk	0.192543		yqeF	0.249358		yobB	0.138718		mukF	0.191815		ryfB	0.209052		hflK	0.047907		ecpD	0.219121		yjdC	0.302997		mpl	0.241816		ryfA	-0.0412978
yoeB	0.086081		lpxH	0.192531		metI	0.249182		gudP	0.138706		mntH	0.191749		araG	0.20879		yijF	0.0479003		clcB	0.219081		insB-5	0.302648		panC	0.241777		barA	-0.0427151
tyrR	0.0860595		lolB	0.192414		trxA	0.249043		cmoB	0.138663		ymjA	0.191436		ydfI	0.208097		yfcH	0.0478516		yedK	0.218988		ymfE	0.30217		rraB	0.241539		ygiW	-0.0431626
fepA	0.0859772		fabG	0.192308		phr	0.248895		soxS	0.138647		yhjE	0.191368		yjdF	0.208093		yfdX	0.0477755		pmbA	0.218987		kefC	0.300799		yifB	0.241299		focB	-0.0433712
pgm	0.0859351		frlA	0.190087		glyA	0.24863		ygjI	0.138412		feoA	0.191294		hcp	0.207695		tam	0.0477616		ychJ	0.218851		gntR	0.300319		torC	0.241056		msbA	-0.0440883
ydiL	0.0856921		btuF	0.188549		yebY	0.248601		flgA	0.138183		rspB	0.191093		ycfP	0.206842		ybcN	0.0477245		yjdJ	0.218723		yjdO	0.300286		ppc	0.241035		yceJ	-0.0446941
ydcT	0.0853807		mdtH	0.186687		ynhG	0.247963		entA	0.137939		leuB	0.190925		acpS	0.206798		ycgM	0.047645		torC	0.218133		lpxT	0.299749		ytfH	0.240915		frvB	-0.0449731
yqfB	0.0852825		gabP	0.186248		clsC	0.247842		insE-4	0.137672		eno	0.190741		sodB	0.20665		dcuA	0.0475425		kdpA	0.218104		csgG	0.299422		panB	0.240659		yecS	-0.0451866
livK	0.0852417		ftsE	0.185493		kduI	0.247697		tdcC	0.1376		yhhJ	0.190691		yehS	0.205782		mntR	0.0475052		ggt	0.21765		ynbE	0.299271		yciT	0.240557		atpF	-0.0453107
tatC	0.0852006		smtA	0.18508		yjhX	0.247661		chiP	0.137591		kdpD	0.190605		dauA	0.205549		ybhQ	0.0474292		yahG	0.217336		amtB	0.298831		waaU	0.239883		yqeF	-0.0453971
fliE	0.0851654		rbsR	0.183506		cadB	0.247584		yciW	0.137584		nrfA	0.190595		frdA	0.205487		yddE	0.0473958		yigI	0.217285		yciQ	0.298822		ilvY	0.239796		nagK	-0.0457637
pepP	0.0851585		fldA	0.18292		flgK	0.247531		glcC	0.137478		queF	0.190578		lipA	0.205393		gntP	0.0472944		yccA	0.215969		slp	0.298451		phnE_2	0.239757		paaK	-0.0458099
insH-11	0.0850723		phnH	0.18256		citE	0.247151		nirB	0.136692		frvB	0.190491		yhjA	0.20518		eco	0.0472696		lar	0.215367		ynfE	0.298432		sxy	0.239612		emtA	-0.0464168
ycjD	0.0849565		nagB	0.181847		gloB	0.246774		glpF	0.136663		ylbH	0.190103		recX	0.204988		ynfK	0.0472197		ycbC	0.215272		gldA	0.298393		malZ	0.239169		der	-0.0466282
dsrB	0.0848503		ytfR	0.181751		yjbR	0.246187		apbE	0.136537		ymfD	0.190004		gspL	0.204705		cpdB	0.0471622		ybcJ	0.215243		bamC	0.298024		yihR	0.239022		sulA	-0.0466595
ydiE	0.0845582		srlR	0.180833		yqgE	0.246097		ispB	0.136508		djlA	0.189999		ytfH	0.204611		yjdC	0.0471269		yfaW	0.215236		yhjA	0.297869		ompC	0.238985		yhaO	-0.0468336
yhjR	0.084478		kgtP	0.179769		ynjB	0.245931		yhcO	0.136391		kdgK	0.189902		rutB	0.204508		mrr	0.0469597		ugd	0.214952		pflA	0.297492		yfiC	0.238741		ydgI	-0.0477094
zinT	0.0841301		casD	0.179703		cstA	0.245619		ycbJ	0.136079		argV	0.189818		yqgF	0.204133		argD	0.0468632		yjdI	0.214803		mutH	0.297092		ybbY	0.238371		fabA	-0.0478007
tomB	0.0841276		coaA	0.17781		yegS	0.245257		yeaR	0.135988		paaB	0.189312		hflK	0.203978		mdtE	0.0467597		yjfN	0.214414		metQ	0.297018		emrA	0.23829		acnB	-0.0482371
dmsC	0.0840551		yccA	0.177602		yqjI	0.244744		insK	0.135874		folK	0.189088		yedR	0.203608		thiP	0.0466992		pbl	0.214393		yedS_2	0.296814		malX	0.237994		mdaB	-0.0486309
mrdA	0.0839907		gntR	0.176621		yddK	0.244232		ydhT	0.135732		menD	0.188964		ybjS	0.203391		yhiL	0.0466619		yhhT	0.21407		osmF	0.296474		gadY	0.237804		yihP	-0.0487348
yhjH	0.083938		flgI	0.175267		dsrB	0.244197		kefC	0.135721		ndk	0.188928		mzrA	0.203385		moaA	0.0466253		gadW	0.214048		tyrA	0.2964		gutQ	0.237738		arnD	-0.049547
agaV	0.083736		glnL	0.173512		rcsB	0.244003		ribC	0.1355		rlmI	0.18889		yieP	0.203244		rlmD	0.0465907		ivbL	0.213995		ycjD	0.296029		mutH	0.237141		grcA	-0.0500522
rseB	0.0836175		mhpE	0.173101		yhhN	0.243874		yeaP	0.135344		yjaG	0.188886		yqhD	0.203019		hinT	0.0465624		ybaL	0.213813		yfcA	0.295851		crp	0.236916		malY	-0.0500939
dapE	0.0835712		dgoA	0.172652		mobA	0.243667		emrA	0.135253		dsbG	0.188884		mioC	0.202892		adiY	0.0465584		yqhG	0.213769		yshB	0.295665		exbD	0.236846		arnC	-0.0504972
mutY	0.0831852		yacL	0.172506		speF	0.243116		mazF	0.135027		alr	0.188842		gntT	0.202863		ybjP	0.046494		cysM	0.21321		fdoH	0.295495		ebgA	0.236815		cysW	-0.0507578
paaI	0.0831366		ugpE	0.172449		yjfC	0.243031		ydiR	0.13498		yliF	0.188759		livJ	0.20243		yjbL	0.0464351		thrL	0.213158		thiS	0.295293		waaY	0.23658		melR	-0.0514567
etp	0.0830673		galS	0.172334		atoS	0.242888		hdfR	0.13471		feaR	0.188695		hofB	0.202115		bglA	0.0463722		pka	0.213092		ygiV	0.295231		sucA	0.236244		fldB	-0.0514997
uspA	0.0830435		fucO	0.171958		hemH	0.242815		pheP	0.134637		yciQ	0.188227		yeiG	0.201649		yjaH	0.0463627		dedA	0.212849		iadA	0.295027		yibQ	0.23616		uxaB	-0.0516029
ggt	0.0825034		hyfA	0.16936		ygjV	0.242673		yoaD	0.134559		waaY	0.187847		edd	0.201348		mdtL	0.0463034		yqfB	0.212292		clsB	0.294907		folD	0.236144		aroP	-0.0519534
phnK	0.0823131		paaA	0.169157		uidR	0.242663		ybbY	0.134352		anmK	0.1878		dsbC	0.201312		yhcH	0.0462923		yeeA	0.212263		trmI	0.294902		fimF	0.235668		fucK	-0.0523063
ychJ	0.0823121		rimJ	0.169029		hpf	0.242637		galU	0.133923		ldcA	0.187738		psiE	0.200722		ybhF	0.0462795		efeU_1	0.212111		mukF	0.294816		uup	0.235537		atoD	-0.0534277
ybiT	0.0823024		hemY	0.168281		pheU	0.242467		ulaB	0.133582		paaD	0.187253		uxuR	0.200507		ubiF	0.0462706		ylbE_2	0.212048		fadM	0.294619		scpA	0.235331		nagE	-0.0535061
ycbL	0.0821404		apt	0.167278		osmB	0.242222		ygcR	0.133582		afuB	0.187065		astC	0.200444		yeeO	0.0462298		hyfJ	0.211539		yedZ	0.294355		araB	0.234328		yecC	-0.0536835
pgi	0.0820774		treR	0.166753		bdcR	0.242085		pth	0.133403		psiE	0.186831		add	0.200272		chbF	0.0461932		fimH	0.211493		yihV	0.294192		ybgE	0.234318		ybjJ	-0.0538592
yniC	0.0819479		rihB	0.166261		arnE	0.241964		hyfF	0.133294		kdsB	0.186649		sthA	0.199651		prpD	0.0460732		xylE	0.211401		oxc	0.293599		citE	0.234114		yhjE	-0.0542796
yegS	0.0819153		cyoB	0.165265		dacC	0.241031		pgi	0.133252		brnQ	0.186574		uidR	0.199365		gadC	0.045978		ahr	0.211166		waaY	0.29356		rayT	0.233724		pfkA	-0.054468
yhdZ	0.0818687		torC	0.161881		alsB	0.240993		yghO	0.133094		yhhS	0.186469		yfaW	0.199313		argB	0.0459386		ttdT	0.210637		yphF	0.293051		ybaY	0.233241		malE	-0.0547878
ylcH	0.0817766		hcaC	0.160526		hyaB	0.240864		wzxC	0.13305		secY	0.186429		yedQ	0.19928		yqaB	0.045812		menF	0.210495		citX	0.292987		fliR	0.232974		serC	-0.0551423
idi	0.0814212		aroD	0.160315		ygiC	0.240718		entD	0.13292		nrdA	0.186192		modC	0.199071		yafW	0.0457653		yhdJ	0.210463		rffC	0.292538		oppC	0.232753		clsB	-0.0552169
yhgN	0.0811816		hpt	0.160192		ygfQ	0.240156		yhcA	0.132859		yhaK	0.186066		aldA	0.19906		entD	0.0457647		insN-1	0.210271		rseB	0.292198		ygiA	0.232422		lplA	-0.0553485
ugpE	0.0811372		panF	0.159362		yjcS	0.240103		zraR	0.132695		yjjY	0.185986		trpR	0.198594		micM	0.0457466		ccmG	0.209977		yicR	0.29197		adiC	0.23234		fepC	-0.0556001
nudB	0.0809481		yjhU	0.158294		lldP	0.239915		yahJ	0.132587		cpxR	0.185903		cas2	0.198545		ldrA	0.0456163		yfjL	0.209974		garL	0.291966		ade	0.232283		metE	-0.0559023
allD	0.0807922		yjjG	0.157687		rfaH	0.239715		ubiX	0.13256		crl	0.185637		yciV	0.198451		cmtB	0.0456154		amiB	0.20979		yhbW	0.29172		narX	0.232127		rhaM	-0.0560755
rnd	0.0807155		ybhF	0.157595		fruA	0.239601		flgK	0.132453		yidH	0.18562		macA	0.198315		yggU	0.04548		yncD	0.209348		gloB	0.291016		ygbM	0.232041		icd	-0.0567486
rplU	0.0806973		otsA	0.157489		ykgD	0.239407		grxC	0.132385		yliE	0.185378		otsA	0.198048		yeaM	0.0454657		mzrA	0.209147		ligA	0.290799		racC	0.231915		ydeK	-0.0571588
ygbM	0.080667		glcA	0.155996		waaY	0.239199		yhbE	0.131987		allB	0.185091		ydiO	0.197888		yniA	0.0452821		fadA	0.209147		umpH	0.290548		tar	0.231682		sapD	-0.0578835
grxD	0.0805063		sgcA	0.155491		rpsP	0.239144		iclR	0.131774		yjbM	0.184987		ygiF	0.197614		cysP	0.0451502		yrdB	0.209026		yicG	0.290475		clsC	0.231634		fruA	-0.059914
tdcC	0.0805011		lacZ	0.155046		ygaU	0.238892		ykgO	0.131764		ydcZ	0.184931		mdlB	0.197314		creA	0.045031		amn	0.208896		gcvB	0.29044		nrdF	0.231614		tmcA	-0.0606295
uidA	0.0802756		icd	0.154907		rutR	0.238677		amiA	0.131486		ydhS	0.184925		casD	0.196967		recB	0.0449771		yggL	0.208709		garK	0.290406		cspE	0.23133		ycaI	-0.0606901
rbsR	0.0800862		ppx	0.154897		hsdM	0.238571		ydcI	0.131471		lpxH	0.18483		cytR	0.196535		ymgC	0.0449473		mhpE	0.208672		aroK	0.290114		ivy	0.231118		ltaE	-0.0607147
yajI	0.0797287		cynT	0.153158		fliJ	0.23854		cynX	0.131453		yceF	0.184643		gatB	0.1963		yjbH	0.0448272		astA	0.208447		yfgJ	0.290092		mog	0.230949		hemF	-0.0607817
yciZ	0.0796684		cueO	0.152682		hybA	0.238307		talA	0.131421		ung	0.184468		dacB	0.196247		phnN	0.0447705		yecC	0.208425		yaiV	0.289987		clpA	0.230513		purR	-0.0612253
fau	0.079562		cheA	0.152371		rssA	0.238146		b0105	0.131154		ykfC	0.184201		bax	0.19623		patA	0.0447464		idnO	0.20796		modF	0.289626		rfaE	0.230404		dctA	-0.0617712
ppk	0.0787953		sapD	0.150898		cbl	0.238026		dppA	0.131131		mnmE	0.184106		mreC	0.195914		yiaJ	0.0447099		yahC	0.207601		gltW	0.289187		polA	0.230396		mepS	-0.0622763
rihC	0.0786978		ygbM	0.149556		folK	0.237983		astD	0.131127		xylH	0.184065		ycaN	0.195898		xylB	0.0446858		nusB	0.207238		ybcW	0.289046		intG	0.230242		yfbS	-0.0627846
astB	0.0786628		waaA	0.147849		elbB	0.23755		sapA	0.130962		ecpC	0.183932		csiR	0.195547		umuD	0.0446812		frvB	0.206921		yojI	0.289004		yigE	0.229936		hyfB	-0.0635367
znuB	0.0783844		cutA	0.147239		ddpX	0.236996		fadI	0.130875		hycI	0.183872		ynfK	0.195537		dmsA	0.044656		ygcR	0.206721		ybfP	0.288918		elaA	0.229927		glpE	-0.0640921
rrrD	0.0783044		hscC	0.146377		sra	0.236744		syd	0.130798		murI	0.183501		nrdI	0.195429		yghQ	0.0446059		aspA	0.206379		hyfD	0.288886		afuC	0.229867		pabB	-0.0649615
yfcQ	0.0782962		nagC	0.146194		ygcR	0.236733		yfaU	0.130729		yoeA	0.183047		allS	0.195405		ykgF	0.0445605		yqeJ	0.206292		flgB	0.288718		alkA	0.229836		gmm	-0.0651951
yfbV	0.0779975		yhdP	0.146187		pbpC	0.236672		yiaB	0.13065		efp	0.182518		secM	0.195392		dbpA	0.04451		intQ	0.206262		fepB	0.288469		yegT	0.229456		gdhA	-0.0656247
moaA	0.0777368		sgcE	0.14529		rffA	0.236457		ytfP	0.130641		flhA	0.182119		gsk	0.195387		ydfH	0.0444212		mglB	0.205907		nagB	0.28737		ydhC	0.229442		flgD	-0.0656922
appB	0.0775856		phnN	0.144801		uvrC	0.236307		yjdL	0.130427		folD	0.182008		ymgH	0.195378		sspA	0.0443995		nanT	0.205861		rna	0.287113		sulA	0.229394		yigM	-0.0663868
ssuC	0.0775211		fimD	0.144232		rhsC	0.235907		fimE	0.13042		cusA	0.181718		fdoI	0.195147		nanA	0.0442966		fimG	0.205789		tyrP	0.287036		yfdN	0.22921		manX	-0.0665315
intB	0.077203		yjjJ	0.143823		fhuC	0.235766		gph	0.130389		pspF	0.18106		zur	0.194689		garP	0.0441437		modC	0.205295		yiaJ	0.286713		yjdA	0.229114		yhbT	-0.066745
yciA	0.0771558		rfbC	0.143213		rarA	0.235583		greA	0.130223		ycjO	0.181001		slt	0.194536		fliF	0.0441127		ycfK	0.205087		fimC	0.286198		ydcK	0.228955		yggT	-0.0669122
recF	0.0770763		sufS	0.142802		lptD	0.235341		agaA	0.130138		renD	0.18066		yfeR	0.194414		marB	0.0440159		fpr	0.204496		ugpB	0.286123		wcaJ	0.22869		potI	-0.0669727
atpH	0.0768967		galP	0.142127		ppdA	0.234989		yojO	0.12987		intQ	0.180548		preT	0.193632		ydeI	0.0439715		yhbO	0.204434		yfjY	0.286065		rsmC	0.22837		yciG	-0.0680618
hisA	0.0766282		yggT	0.140769		yafN	0.2349		mak	0.129687		birA	0.180476		ftsZ	0.193614		ygaY	0.0439687		yciZ	0.204213		cysU	0.286056		thrW	0.228264		bluR	-0.0689351
tsx	0.0765955		aaeR	0.139657		argH	0.234694		yedR	0.129628		acpH	0.180174		ybjJ	0.19344		scpB	0.0437691		yniC	0.204081		fabD	0.285735		ydeA	0.228114		arcB	-0.0692241
hisP	0.0765482		menB	0.139289		yohD	0.234639		yjjQ	0.129485		katE	0.179919		pheA	0.192969		ydiR	0.0437563		ysgA	0.20385		yhjY	0.285678		mdtP	0.228111		pfkB	-0.0692245
mtfA	0.0764483		ynfM	0.138761		ipeX	0.233676		ypdI	0.129474		hyfR	0.179439		nrdD	0.192677		rfe	0.0437255		ygiM	0.203127		cysP	0.285479		ispH	0.22798		mrdB	-0.0697665
yfaH	0.076435		artQ	0.138606		scpC	0.233468		ybjD	0.129457		asnA	0.179252		zapC	0.192468		gltJ	0.0436765		ygfK	0.20307		macB	0.285153		fliS	0.227841		rcsB	-0.0698034
yfbL	0.0763261		srlA	0.137886		ansP	0.233193		ynfE	0.129346		dgoD	0.178474		hsdM	0.192383		wcaB	0.0436357		abgT	0.202419		yfcE	0.284874		eutJ	0.227721		rbsB	-0.0700513
yfiE	0.0762639		relA	0.137141		gmd	0.232912		lacY	0.128998		hcaF	0.178434		phnN	0.192327		mcrC	0.0435291		ynaE	0.202411		rplK	0.284768		ilvA	0.227629		xdhC	-0.0701969
gntR	0.0759472		gcvT	0.136953		csgC	0.232727		fdoI	0.128806		gldA	0.178263		sohB	0.191146		flhD	0.0435192		mcbA	0.202254		gspC	0.284493		citD	0.227332		sthA	-0.0702511
paaJ	0.0758928		thiQ	0.135347		tyrB	0.232693		yceH	0.128698		grxC	0.178129		nrfB	0.191063		yafQ	0.0434836		apbE	0.201914		glpX	0.284366		trkA	0.226595		ydeO	-0.0705215
cmoA	0.0758875		cysB	0.134727		yjfP	0.231839		ycfP	0.128336		pstC	0.177858		aroE	0.191025		xylR	0.0434597		purR	0.201677		ompA	0.284254		yqfE	0.225876		fucO	-0.0705306
gldA	0.0756121		metB	0.134612		ycaL	0.231564		phnF	0.128216		yiaN	0.177718		yhiD	0.19097		lpxB	0.0434265		gabP	0.20164		sroC	0.284177		yjfI	0.225866		yebQ	-0.0716893
cusS	0.0755512		cycA	0.133789		idnR	0.231115		rusA	0.127954		eutC	0.177432		tusD	0.190939		malZ	0.0433611		yodB	0.201599		rhaR	0.283978		sufS	0.22572		cmtB	-0.0718527
ykgB	0.0755086		fldB	0.131304		sroC	0.230738		narW	0.127879		glnL	0.177313		rutG	0.1902		putA	0.0433295		yhfX	0.201226		ybaL	0.282805		yjbH	0.225521		mdlB	-0.0719646
stfR	0.0755048		cadC	0.130371		ligA	0.230641		fucK	0.127695		yadD	0.17702		trxC	0.190163		nirD	0.0430538		ydfE	0.20119		tolC	0.282458		endA	0.225462		ddpA	-0.0721084
ynfF	0.0754867		gspK	0.129433		bglF	0.230564		ydeP	0.127561		mltF	0.176935		yagI	0.190025		barA	0.0430486		pcm	0.20089		ybhJ	0.282385		rydB	0.225379		tnaA	-0.0722742
dapB	0.075426		galE	0.129042		yobF	0.230283		yeeX	0.127347		eutQ	0.176788		kduI	0.189878		dppA	0.0429834		aroE	0.200766		fixB	0.281238		frlC	0.225232		nhaA	-0.0723042
yneK	0.0753325		tolB	0.128895		pdxY	0.229963		yecR	0.127211		yfgF	0.176696		gabP	0.18954		ppsA	0.04298		prfH	0.200728		tyrV	0.281103		dinG	0.225139		yphE	-0.0723521
yccU	0.0751863		atpC	0.128412		bcsF	0.229645		torY	0.127177		exbB	0.176648		rrsH	0.189301		htpX	0.0428952		nemA	0.20053		yraN	0.280955		gatC	0.225036		kdpB	-0.0725463
nudJ	0.0751446		ispF	0.125835		alpA	0.229504		thiI	0.127163		suhB	0.176528		ascB	0.189148		ychO	0.0428423		ruvC	0.20035		dxr	0.28045		flgL	0.224922		cadB	-0.0729794
yhjX	0.0749336		glnG	0.125256		yohC	0.228962		rsd	0.127124		yafD	0.17627		fucI	0.189088		yjgR	0.0428037		mutY	0.200306		yciB	0.280441		zinT	0.224853		mscK	-0.0731333
dgoK	0.0749264		waaS	0.124823		dppC	0.228744		aidB	0.127113		omrA	0.176218		rdgB	0.189065		loiP	0.0427297		tisA	0.200264		alpA	0.280017		pdxY	0.224737		alaC	-0.0739279
aceE	0.0748547		ydfJ	0.124719		ybbB	0.228475		arnT	0.127002		phoU	0.175636		ybjP	0.188473		pdxY	0.0427245		mgtA	0.200034		ygiQ	0.279528		menH	0.224609		cycA	-0.0740349
ybaL	0.074734		frmR	0.124542		panE	0.228077		dapE	0.126944		hokB	0.175505		codA	0.188433		glnB	0.0426813		zraS	0.199992		glnL	0.279282		creB	0.224554		kgtP	-0.0740823
vsr	0.0744717		dacA	0.123898		lpxP	0.2279		fliH	0.126851		gnd	0.175387		dadA	0.187971		fimZ	0.0426229		fryC	0.19998		sapC	0.279135		ymgH	0.224445		narK	-0.0745764
yraH	0.0742858		clcB	0.123435		dhaK	0.227542		hscA	0.126556		aegA	0.175272		rfbC	0.187772		ydjJ	0.0425884		sodA	0.199728		yaiI	0.279092		cynS	0.224207		nuoI	-0.0745846
atpE	0.0742441		fabR	0.122933		elaB	0.227539		gldA	0.126352		acrA	0.175199		ynbE	0.187362		yliL	0.0425741		ydbD	0.199642		aroE	0.278877		chaA	0.223771		ptsP	-0.0746005
yhbS	0.074175		mlc	0.122335		ygdG	0.227075		iadA	0.126243		fliK	0.1751		nudG	0.187185		nmpC	0.0425242		hscC	0.199403		folC	0.278703		ybgO	0.22377		glnL	-0.0752702
envC	0.073963		moaC	0.121769		hemB	0.227015		phoH	0.126091		astD	0.174948		zntR	0.187081		ydiY	0.042474		yhaO	0.199339		fkpB	0.278621		srlB	0.223602		hscC	-0.0754418
hemN	0.0737131		ygaC	0.121399		nudK	0.226948		dctA	0.126026		hinT	0.174909		ybcM	0.186691		diaA	0.0424088		ulaD	0.199136		ftsW	0.278376		kefB	0.223341		hisQ	-0.0755981
astC	0.0737083		narG	0.120585		yijE	0.226237		baeR	0.125856		lptE	0.174815		ppdA	0.186266		paaY	0.0423976		acrD	0.199127		fdoI	0.278187		ribE	0.223194		yghZ	-0.0763796
topA	0.0735391		hemE	0.118699		dsdX	0.22608		yefM	0.125799		yqeB	0.174233		glxK	0.186201		ydiT	0.0423367		yaaY	0.198873		ygjJ	0.278104		yphB	0.223056		yliI	-0.0765075
ycjW	0.0734978		gatR_1	0.118629		hrpB	0.225999		ybeQ	0.125771		ylcG	0.174175		narZ	0.186162		rrrD	0.042328		mpaA	0.198366		yedK	0.277968		putP	0.222647		nuoA	-0.0772817
tppB	0.0733512		zur	0.118341		yphE	0.225959		sufA	0.125703		rhaR	0.174066		yegW	0.186118		ydcU	0.0423181		ybeZ	0.198279		gntU	0.277908		yhcB	0.222644		btuC	-0.0780132
yfaU	0.0732627		gor	0.118296		tauB	0.22579		entB	0.125589		ybhD	0.173624		torC	0.186084		queG	0.0422859		yjhD	0.198172		gsiD	0.27784		dtd	0.22245		livG	-0.0785913
rpsP	0.0732425		fimB	0.117632		carA	0.225644		cas3	0.1254		moaC	0.173356		ycjD	0.184998		dkgB	0.0422489		ynfM	0.198172		queF	0.277254		yeiH	0.222349		phnF	-0.0793593
nuoI	0.0729178		treF	0.117504		pnuC	0.225506		djlB	0.125238		mrdA	0.17316		paaA	0.183962		yhhT	0.0422117		cheR	0.197892		hlyE	0.276277		argG	0.222248		metF	-0.0803968
zwf	0.0728293		ydiB	0.116533		b1052	0.225141		yihA	0.125181		dnaB	0.173037		oppA	0.183838		fliM	0.0421797		nirB	0.19767		appY	0.275672		rffH	0.221917		treR	-0.0805955
appA	0.0727794		nikE	0.11273		nhaB	0.224838		amn	0.124999		thiL	0.172944		chbR	0.183616		spy	0.0421642		xdhD	0.197454		ymfH	0.275608		ygdG	0.221874		sfmH	-0.0807236
fliR	0.0726644		cysW	0.11259		trmI	0.224432		sdiA	0.124559		pepT	0.172832		hflC	0.183259		yhhQ	0.0420979		fhuD	0.197154		luxS	0.275156		mdfA	0.220879		aas	-0.0812057
exuT	0.0725886		exbD	0.112126		ydiF	0.22415		uxuB	0.124461		ubiX	0.172592		hipA	0.1831		yicN	0.0420723		trpC	0.196986		yafP	0.274872		rlmJ	0.220781		ybcI	-0.0813167
fsaB	0.0725731		yehW	0.109421		bamB	0.223888		ycaM	0.124457		melR	0.172389		ubiI	0.182818		yfiF	0.0419846		fumC	0.196898		nsrR	0.274323		metN	0.22076		xylR	-0.0813375
cysH	0.0725275		waaL	0.10936		ycfL	0.223692		yjaA	0.124354		yccB	0.17238		yhbX	0.182812		astB	0.0419225		lomR_2	0.196825		ycgV	0.273895		yojI	0.220709		ptsI	-0.0824225
ycaO	0.0724257		ybaT	0.108838		seqA	0.223678		ldhA	0.12429		yibJ	0.172311		cysN	0.182083		yhjB	0.041897		rseA	0.196788		zntR	0.273735		yddL	0.220291		kbl	-0.0824652
barA	0.0724066		ydbD	0.105875		rhaT	0.223597		yibL	0.124261		yeaN	0.172238		gfcB	0.181945		atoD	0.0418851		hupB	0.196513		cof	0.273222		rpsO	0.220118		uhpC	-0.0832666
uvrC	0.0723702		gltI	0.105438		yaeI	0.22262		yciC	0.124204		baeS	0.172047		yjjB	0.1818		mhpT	0.0418313		eutS	0.195928		fldB	0.273166		yoeB	0.220015		murG	-0.0844162
C0664	0.0722708		ygjK	0.103889		yjiJ	0.222599		fdnI	0.12415		ydiV	0.171999		insO-1	0.18159		fliG	0.0418168		fliH	0.195644		argU	0.273014		iclR	0.219818		cyoB	-0.0847247
yoaE	0.0721476		ydjI	0.103469		tomB	0.22235		ubiC	0.12409		rpsR	0.171994		ydeO	0.181347		yfjQ	0.0417664		evgS	0.195243		nirB	0.272965		gspL	0.219804		fpr	-0.0850185
rfbX	0.072113		ptsN	0.101572		yeaV	0.222166		yhiI	0.123875		metF	0.171839		panE	0.181313		ynfA	0.0417241		kdgT	0.195072		napG	0.272588		malT	0.21969		uidB	-0.085743
yafQ	0.0719705		flgF	0.101333		tdh	0.222068		yjjM	0.123801		yjiY	0.171764		pgpA	0.180928		wzxC	0.0417044		yjiG	0.194933		yijO	0.271986		yjjW	0.21955		proX	-0.0858695
acrD	0.0718579		mipA	0.100827		hdeB	0.221969		yhfW	0.123511		fnr	0.171493		tamB	0.18091		deoB	0.0416783		argC	0.194894		rcnA	0.271859		qseB	0.219246		ykgG	-0.086387
rnt	0.0718316		ydiP	0.100016		tdcD	0.221922		yddE	0.123462		ybeL	0.171258		glnK	0.180326		ldrC	0.0416012		yfdX	0.194894		pntA	0.271811		yihO	0.21888		gabP	-0.0868489
mglB	0.0718287		fpr	0.0991249		yliL	0.221708		yedJ	0.123393		csgD	0.171021		yfbT	0.180176		cbrC	0.0415186		hemY	0.194887		mltB	0.271244		yjjX	0.218763		hyfA	-0.087831
idnK	0.0718183		yqaE	0.0980558		nac	0.221063		dhaM	0.123359		rsfS	0.170934		ftsB	0.180122		gntT	0.0414383		yhjA	0.194408		bcsA	0.271063		wbbL_2	0.218709		exoX	-0.0880775
fadM	0.0717906		gabD	0.0962496		frvX	0.221027		gpmM	0.123256		thiM	0.170915		coaA	0.17989		yijD	0.0414144		sbcB	0.194366		yedR	0.270769		fruB	0.218349		ybhR	-0.0893664
insF-4	0.0717636		fruA	0.0960718		yfeZ	0.2209		acrZ	0.123234		gutQ	0.170748		astA	0.179621		intF	0.041406		agaB	0.194012		acnA	0.270492		mntR	0.218161		cysM	-0.0895617
tdk	0.0715482		slyB	0.095835		mlaA	0.22029		cas2	0.123097		cysB	0.170578		metH	0.179267		fadI	0.0411463		ynfH	0.193994		uidR	0.270469		pntB	0.218148		paaH	-0.089855
hchA	0.0715228		modC	0.0954583		tyrV	0.219917		ykfJ	0.123037		patD	0.170526		yghW	0.179007		yicR	0.0411296		pgaC	0.193566		rcsF	0.26995		rssA	0.218098		mdtK	-0.0900118
ycfJ	0.0714001		ddpB	0.0951999		yihQ	0.219836		menD	0.122771		evgS	0.170246		mpaA	0.178939		menD	0.0410566		yehB	0.193227		iscX	0.269661		ygcR	0.218007		appB	-0.0904477
nanA	0.0713322		tusB	0.0948308		ybhU	0.219786		yedE	0.1226		yjiA	0.170193		fadI	0.178758		prc	0.0410565		yigL	0.193175		lldR	0.269454		argH	0.217668		cpsB	-0.0906986
ydiP	0.0712246		dppA	0.0939363		phnE_2	0.219697		kch	0.122595		yciB	0.170182		yraR	0.17865		xylH	0.0409874		sraF	0.19308		ypdA	0.269446		acs	0.217312		betB	-0.0910429
yccX	0.0711927		rbsC	0.0938734		iscR	0.21896		nikB	0.122563		yaaY	0.169982		dacC	0.178405		yhjA	0.0407309		ais	0.192708		hokA	0.269351		ybiT	0.217078		mlaE	-0.0910566
emrD	0.071098		atpG	0.0925477		aroF	0.218628		lpxL	0.122497		malY	0.169873		csgA	0.178104		flgB	0.0406796		yghS	0.192492		wcaJ	0.268954		ycjF	0.21659		alr	-0.0929226
argE	0.070867		yccS	0.0915993		mrcA	0.218432		bcsF	0.122438		mngB	0.169458		yfeH	0.17782		tauA	0.0406626		abgA	0.192407		cfa	0.268787		yebC	0.216321		hyaE	-0.0932973
tam	0.0707646		iraP	0.0912323		mrcB	0.218394		glnB	0.122434		yqeI	0.169386		waaC	0.177561		ygbK	0.040617		tas	0.192357		rsxD	0.268776		clcB	0.216136		lsrC	-0.0940139
ybfA	0.0706786		allC	0.0910498		qmcA	0.218294		ydjG	0.122403		pepN	0.169365		rpiR	0.177162		ybcJ	0.0405135		proY	0.192295		folD	0.26782		nanK	0.21575		rbsC	-0.0942264
purU	0.070537		dhaL	0.0908629		eutJ	0.21817		ychG_2	0.122336		ygjK	0.169301		gfcA	0.176552		yjfK	0.0404491		ygbE	0.192126		gloA	0.267756		lspA	0.215641		murP	-0.0946978
focB	0.0704191		tolA	0.0905438		ykgB	0.217502		ydhB	0.122287		yaaA	0.16903		marB	0.176541		yqjF	0.0403329		insL-3	0.191974		frvX	0.267642		cysG	0.214829		glpK	-0.0952725
mppA	0.0703754		ubiB	0.0894546		ycbC	0.217149		yhhH	0.122053		pal	0.168914		diaA	0.176363		lrhA	0.0402923		lit	0.191974		alr	0.267472		artI	0.214289		ygaZ	-0.0959172
yfgM	0.0703729		micC	0.0873609		waaZ	0.216753		ugpB	0.121894		ycjG	0.168759		micM	0.176		pgsA	0.0402504		hofQ	0.191968		rsxB	0.267408		yphH	0.214226		araB	-0.0964538
qmcA	0.0703375		pbpC	0.0863515		dmsC	0.216516		add	0.121875		proP	0.168757		malG	0.175887		dkgA	0.0402232		yjbL	0.191627		ybhH	0.267121		flhC	0.214036		minC	-0.0965136
fpr	0.0703362		narV	0.0858345		ydbL	0.216502		blc	0.121823		ybjE	0.168686		exuR	0.175762		hyfA	0.0402201		yeeL_1	0.191301		yqeI	0.266431		yajR	0.213971		motA	-0.0967291
ybjI	0.0702862		flgM	0.0845187		hpt	0.216438		yecN	0.1216		ypaA	0.168651		yhaO	0.175709		lit	0.040114		yafU	0.191212		ybgL	0.266423		ybjO	0.213643		udp	-0.097065
ahpF	0.0702665		hcaR	0.083347		thiP	0.2158		srlE	0.121475		nac	0.168538		efeU_1	0.17525		chaC	0.0400291		rcnR	0.191059		yfcH	0.265989		yccT	0.213119		nuoM	-0.0973288
cydC	0.070182		ubiC	0.0826505		yfcZ	0.215473		hybF	0.121445		hisA	0.168302		ybaE	0.175022		mngB	0.039972		exbD	0.190949		lldP	0.265872		ybiA	0.212831		yfaV	-0.0979376
dinB	0.0701406		hyfE	0.0820777		ryhB	0.215287		psuG	0.121351		ycjT	0.168068		matP	0.17405		yafL	0.0398846		yhaJ	0.190937		cusF	0.265632		acpS	0.212654		priA	-0.0987361
ybiI	0.0701303		yjjM	0.0804277		dgoR	0.215278		yfiH	0.121135		fliO	0.16793		yqfE	0.174028		mntH	0.0398076		yibL	0.190927		sixA	0.265099		ansB	0.212576		dcuB	-0.0989612
ybhJ	0.0701018		yieP	0.0802531		gspG	0.21501		cmtA	0.121101		yhfL	0.167828		rcsC	0.174028		yccT	0.0397327		wcaE	0.190512		fur	0.264874		puuD	0.212317		glnA	-0.0992726
ybcD	0.0699261		nagE	0.0801157		ygfF	0.214823		narZ	0.121072		mscS	0.167669		mukF	0.173828		trpA	0.0396774		yfgC	0.190336		ynfF	0.264777		xdhB	0.212314		ugpQ	-0.100189
yaeB	0.0698793		ptsH	0.0797408		maa	0.214604		glpB	0.121027		dosC	0.167541		osmF	0.172946		yrhD	0.0395343		ybaT	0.190325		cheY	0.264509		pyrE	0.21226		ybbW	-0.100378
ybhP	0.0698661		xerD	0.0789526		fimC	0.213711		torA	0.120959		nuoM	0.167418		mdlA	0.172785		degS	0.039501		yphA	0.190168		gspK	0.2645		frdC	0.212131		mntH	-0.101021
allR	0.0696841		ybjP	0.0785802		ymgJ	0.213439		hofC	0.120656		b1052	0.167378		yfaV	0.172727		paaE	0.0394095		yahK	0.189959		fxsA	0.264434		ydcR	0.212038		ygjI	-0.101128
purN	0.069674		lpxK	0.0777101		bglX	0.213119		speD	0.120625		ompF	0.167166		glcB	0.172632		ugpC	0.0394095		yagU	0.189958		nanT	0.264164		pspG	0.211788		yeeE	-0.10123
yfcV	0.0696484		rpoS	0.0767588		tufA	0.212167		efeO	0.120542		gpt	0.166806		puuB	0.17251		yhhH	0.0393862		yedW	0.189846		pssA	0.263942		dsdX	0.21167		xapB	-0.101282
yjjW	0.0695375		b0309	0.075083		menE	0.211567		cbrC	0.120367		flhB	0.166616		torR	0.172491		sdhA	0.0393394		grcA	0.189258		b0105	0.263935		gadW	0.21161		idnT	-0.101531
ybiY	0.0692859		treC	0.0743542		yjiA	0.21148		pdxK	0.120325		mltD	0.166616		gspH	0.172368		menA	0.0393075		ydiV	0.189063		yeiR	0.263394		sfmC	0.211577		yncI	-0.101853
torD	0.0692141		atpF	0.0718987		potA	0.21147		proX	0.120285		gpp	0.165941		proB	0.171816		wzc	0.0392936		yciN	0.189056		ybgF	0.263172		yaeP	0.211535		cpxR	-0.101861
paaE	0.0692024		yicG	0.0717581		gabT	0.211404		ssuE	0.12028		arnB	0.165517		metQ	0.171651		fryA	0.0392905		pck	0.188412		ada	0.263148		yicR	0.211529		ybhJ	-0.102606
hokE	0.0690822		barA	0.071107		mreC	0.210998		stfR	0.120265		ybfK	0.165379		yeeO	0.171374		tusE	0.0392746		ycjM	0.187929		alaA	0.26237		yfbP	0.210987		narZ	-0.10328
qseB	0.0687898		hybC	0.0709956		yfcR	0.210902		ygfS	0.120126		ymgC	0.164994		uhpC	0.170949		rlmF	0.039087		napH	0.187711		cobS	0.262363		fixX	0.21041		torT	-0.103732
bglF	0.0682933		edd	0.0703863		ddpB	0.210881		yqeJ	0.120055		ompR	0.164986		elfC	0.170459		ycbJ	0.0389898		php	0.187488		ubiC	0.262033		ampD	0.210405		envY	-0.104193
xylA	0.0680041		chaA	0.0701165		putP	0.210853		dld	0.120029		ebgC	0.164774		ygjJ	0.169848		hofP	0.0389675		gsiA	0.187246		trmH	0.262031		ylbG	0.210051		yggE	-0.10568
frdC	0.0679544		ftsH	0.0685812		flhE	0.21066		yicC	0.119658		csgB	0.164561		kdpA	0.169824		tp2	0.0389208		fhlA	0.187098		ygaV	0.261786		ilvC	0.209564		oppA	-0.106706
ydcD	0.0677633		tpiA	0.0684983		fau	0.21062		uxuA	0.119491		emrA	0.16421		ygdG	0.1694		rcnA	0.0388851		ybeY	0.186806		yjiT	0.261664		rsmE	0.20942		pal	-0.106991
treF	0.0677238		comR	0.0679509		yjbB	0.210576		sapF	0.119122		hicB	0.164017		yacL	0.169303		zapD	0.0388032		wzyE	0.186728		yfdG	0.261573		ypjJ	0.209168		bcsF	-0.109187
yrbG	0.0674597		mdtL	0.0677926		paaY	0.209946		ebgR	0.119038		frwB	0.163995		creB	0.169256		appC	0.0387304		yneM	0.18666		dtpB	0.261481		nhaR	0.209084		phoH	-0.110254
ycfP	0.0674357		yhjV	0.0667837		ydhB	0.209894		znuA	0.118931		ydjZ	0.163807		hslU	0.168283		hyaE	0.0387053		agaW	0.186653		psuK	0.261239		ydeE	0.208939		aceA	-0.110871
ybfP	0.0670022		ydhZ	0.0664738		fimZ	0.209614		ypdC	0.118912		asr	0.163596		tesB	0.167994		ycgN	0.0387002		ligB	0.186573		shiA	0.261216		torR	0.208864		galE	-0.111047
yagJ	0.066986		cydA	0.0650447		cusA	0.20948		gltA	0.118647		zitB	0.163457		ykgG	0.167989		mazF	0.0386832		dsbB	0.186381		speE	0.259864		ssuC	0.208393		mglB	-0.112523
ftsY	0.0668564		aroB	0.0645765		yrbG	0.209465		ybeR	0.118646		ravA	0.163065		ybgQ	0.167909		ansP	0.0386638		argT	0.186314		gdhA	0.259267		yhbV	0.208354		yihL	-0.112862
bglJ	0.066855		pntB	0.0639777		thiQ	0.209158		gatY	0.118505		napC	0.162722		phnL	0.167553		yeaV	0.0385908		macA	0.186203		fhuF	0.259194		yagE	0.208046		torD	-0.113182
ypdJ	0.0668517		mukB	0.0635702		frwD	0.208701		uxuR	0.118398		cyoC	0.162609		ydiK	0.16723		argF	0.038443		ydiO	0.186185		yrdB	0.258493		hemE	0.207941		carA	-0.113264
cobU	0.0667419		yccB	0.0634762		rffC	0.208578		wzc	0.118333		yojI	0.16256		fnr	0.165928		ybfE	0.0383984		pppA	0.185972		ycjW	0.258473		ytfG	0.207737		fhuB	-0.113449
dapF	0.0666917		gatY	0.0616787		ylbF	0.208548		betT	0.11816		ycaC	0.162459		yccJ	0.165647		arsC	0.0383464		ybjE	0.18574		kdgR	0.258311		ycbB	0.207715		artM	-0.114223
mscM	0.0666131		lnt	0.061096		yfeS	0.208525		narG	0.118036		rffC	0.162395		hybG	0.165273		katG	0.0383443		chbF	0.185565		clcB	0.258028		fumC	0.207472		thiS	-0.114811
gspG	0.0665787		lsrD	0.0609526		yggT	0.208298		yddA	0.117949		rsxE	0.162386		ygbL	0.165241		tauB	0.0382829		yjfC	0.185095		yajG	0.257707		csiE	0.207451		flgI	-0.115403
dkgA	0.0664185		ugpA	0.059673		yfeW	0.208225		yjjN	0.117619		nagB	0.162361		yhaJ	0.165117		nirC	0.0382563		ybiH	0.184755		trpD	0.257625		mltB	0.207393		osmY	-0.115933
oppF	0.0661718		rtcR	0.0582679		pncA	0.208151		yahI	0.117575		rapZ	0.162328		hybD	0.164232		mntP	0.038196		ychG_1	0.184513		yeeJ	0.257607		fepD	0.207263		hybA	-0.116896
yihG	0.0661696		macB	0.0579629		ycfD	0.207875		ldrA	0.117539		hdhA	0.162309		hepA	0.164138		yqgC	0.0381259		degQ	0.184469		casD	0.257347		csgF	0.207258		sgrS	-0.117594
rluD	0.0661356		upp	0.0573325		proA	0.207387		fliI	0.117419		ydfI	0.162276		uidB	0.163927		yfhG	0.0379709		yfgI	0.184084		ribB	0.257154		greA	0.206957		kdpD	-0.117897
hemH	0.0660764		ppa	0.0570428		treR	0.207174		caiF	0.117081		uidC	0.162168		yfhL	0.163028		mazE	0.0379209		prlF	0.183628		mraY	0.257139		mutS	0.206937		tktB	-0.118528
arcB	0.0659662		mpaA	0.0562093		rffM	0.207021		torS	0.117015		dcuC	0.162126		pta	0.162579		yfdG	0.0378751		hyfE	0.183524		ccmD	0.256991		patA	0.206836		gutQ	-0.118639
nohA	0.0659182		ydcJ	0.054637		fis	0.206699		ddpD	0.116976		yccE	0.161794		metR	0.162569		gntX	0.0378494		hcp	0.183171		fabH	0.256946		mdoH	0.206221		secM	-0.119446
rutC	0.065856		fecB	0.0531767		gatA	0.206522		ttdT	0.116964		sapD	0.161786		nagZ	0.162445		yacC	0.0378077		rsuA	0.183059		sanA	0.256419		usg	0.20617		arnE	-0.120486
yccT	0.0658213		potB	0.0501872		ybhQ	0.206355		cutC	0.116903		nhaA	0.161597		hofC	0.16217		modE	0.0376486		yjbF	0.18294		speG	0.256254		rutG	0.206109		kdsA	-0.121495
ydiS	0.065782		proY	0.0482453		uhpT	0.205771		oppD	0.116889		amtB	0.161489		aceB	0.162097		adiC	0.0375691		ykfI	0.182591		cmk	0.256019		vsr	0.206088		thiK	-0.121989
zapA	0.0655687		uhpT	0.0477391		appB	0.205369		yjiG	0.116871		ddpC	0.161378		pheP	0.161927		yedP	0.0375512		tusC	0.182353		yfhL	0.255777		yibV	0.206088		ptsH	-0.122917
ivy	0.0653537		ahpF	0.0466116		mtlA	0.205368		csgC	0.116789		ghrB	0.161349		dnaK	0.161825		umpH	0.0375163		yeaV	0.182068		yhbT	0.255762		thrA	0.20596		mrcB	-0.123014
entC	0.0651928		ynaA	0.043538		pitA	0.205219		nlpI	0.116706		mrcA	0.161159		gor	0.16157		greB	0.0374639		srlB	0.182016		cysJ	0.255759		yehS	0.205838		mdtH	-0.123572
dcrB	0.0650997		ynfG	0.043268		yegW	0.205212		frvB	0.116512		agaW	0.160643		rsuA	0.161529		sugE	0.0374476		casD	0.181867		mnmG	0.255079		cueR	0.205718		dkgB	-0.123783
psiF	0.0649899		sdhC	0.0432147		yjbE	0.204753		nrfB	0.11623		glnK	0.160515		motA	0.161469		fepC	0.0374069		acs	0.181744		rbsA	0.255035		eutC	0.205696		araE	-0.124432
tusE	0.0647858		paaI	0.0430764		gltK	0.204353		yegT	0.115881		ygbK	0.159925		yggE	0.16139		ybgA	0.0374018		yedI	0.181696		gspO	0.254956		cybB	0.205645		atpD	-0.12466
ribB	0.0645652		dkgB	0.0428568		galR	0.204065		hisH	0.115828		ompN	0.159787		yahI	0.161249		betI	0.0373924		ycdF	0.181595		lpxH	0.254647		rsmD	0.20546		glvC	-0.12524
elfC	0.064442		ybjJ	0.0428098		queG	0.204022		sfsB	0.115733		yegU	0.159315		yafE	0.161171		ychA	0.0373607		fecR	0.181427		yjiM	0.25408		yaiI	0.204887		nrdG	-0.125537
ygaP	0.0642622		metK	0.0394232		otsA	0.203973		gspG	0.115535		ubiC	0.158772		cheY	0.161061		gsiC	0.0372537		bamA	0.181355		rpoE	0.254022		fpr	0.204473		qseC	-0.125837
mhpE	0.0642339		ydjL	0.0390929		rpoZ	0.203768		sgcA	0.115315		rnhB	0.158746		arrS	0.160789		rnd	0.0371398		cedA	0.181124		srlA	0.254018		iraM	0.204342		rhtC	-0.127613
yfjQ	0.0640932		potI	0.0387291		bisC	0.203756		yegR	0.115277		yegL	0.158694		fimD	0.160778		sapF	0.0371146		rhsA	0.181094		yjfI	0.253499		tauD	0.204119		znuA	-0.127659
aidB	0.0640564		hybA	0.0365256		yncI	0.203719		yehW	0.115209		pinR	0.158565		gsiC	0.160553		ybgP	0.037019		yegT	0.181094		prpD	0.253435		sibC	0.203961		seqA	-0.127729
ybdR	0.0640542		nuoL	0.0341351		yjfZ	0.203539		hdeD	0.115195		yhcC	0.158458		lyxK	0.159878		alsE	0.0369916		insH-1	0.180937		glcC	0.253148		hipB	0.203802		fecR	-0.128237
frmB	0.0640316		yjiJ	0.0338744		ydjK	0.202982		degP	0.115138		ybiI	0.158382		tpx	0.159718		pgi	0.0369902		phnH	0.180872		hyaD	0.252468		ygjQ	0.203796		dmsA	-0.129386
mlaF	0.06398		dacB	0.0320922		exoX	0.202923		kdpA	0.115025		yfcP	0.158075		fucR	0.159709		fdoI	0.0368881		hokA	0.180836		glvC	0.251847		ydiO	0.203383		emrY	-0.129865
lafU	0.0639129		macA	0.0318992		hyaE	0.202738		flgE	0.114857		phnI	0.157978		yhcF	0.159633		paoC	0.0368813		proS	0.18079		ypdE	0.251766		rpmJ	0.203148		tnaB	-0.130266
edd	0.0638738		yecN	0.0312642		ssuE	0.2024		malS	0.114831		ygbE	0.157716		ygbN	0.159336		glnL	0.0368074		fixX	0.180755		ygeW	0.25133		ybcI	0.202666		ffh	-0.130267
eco	0.0637593		arnF	0.0294404		thiG	0.202372		kgtP	0.114746		yiaB	0.15764		yjiJ	0.159293		zraR	0.0368038		rlmD	0.180595		eutJ	0.25094		yacC	0.202103		nfuA	-0.131767
fliH	0.0637145		recJ	0.0291323		purD	0.202352		envY	0.114628		setC	0.157638		ybgI	0.159108		yjfI	0.0367937		ynjF	0.180484		casB	0.250406		avtA	0.202065		erpA	-0.131862
ycgR	0.0637097		ydiM	0.0285711		yebG	0.202308		pqqL	0.114625		truB	0.157548		hcaC	0.158943		ebgR	0.0366005		insH-4	0.179729		ybdJ	0.250264		kbaY	0.201922		sapA	-0.132579
tatE	0.0636741		betA	0.0284596		tolQ	0.201947		gltP	0.114551		yneE	0.157356		yggF	0.158739		yafC	0.0365321		yijF	0.179603		ydbJ	0.250144		lplA	0.201251		abrB	-0.132646
flgL	0.063578		basR	0.0277967		macB	0.201943		ybdM	0.114539		yccS	0.157286		nadK	0.158369		gadY	0.0365194		ydhP	0.179114		ydbD	0.250142		gltI	0.201204		rhaT	-0.132743
ccmD	0.0634999		sixA	0.0265171		yjaB	0.201242		proP	0.114455		yeaR	0.157159		ycjV	0.158237		yjiY	0.0365136		rtcR	0.178943		rspA	0.250138		aphA	0.201196		fcl	-0.133053
ymfL	0.0634882		insB-5	0.0259503		hyfC	0.201182		hsdM	0.114101		yfaL	0.157076		ymdB	0.158219		nagZ	0.0363755		serA	0.178936		yjeN	0.250074		recR	0.20115		mhpR	-0.133108
tmcA	0.0634432		tauC	0.0255393		pgaB	0.200999		fliS	0.114089		cpxA	0.156408		mmuP	0.157615		yfaX	0.0363029		ygcG	0.178628		cobU	0.249633		secM	0.200965		dadX	-0.133901
fbaA	0.0634421		nikA	0.0247274		deoA	0.200922		tnaB	0.114077		sdsQ	0.156407		wcaE	0.157441		dtpD	0.0362907		flhB	0.178621		yidG	0.24952		nikD	0.200865		adhP	-0.134072
yibF	0.0633851		mltA	0.0241343		galU	0.200456		fliN	0.113807		grxA	0.156269		yigZ	0.157357		mhpF	0.0361956		nikR	0.178245		pitB	0.249471		galE	0.200024		glcF	-0.134191
lolB	0.0633278		mngB	0.0231557		cytR	0.200385		gfcC	0.113487		glf	0.155905		htgA	0.157267		yhbE	0.0361733		yeeP	0.178138		yoeE	0.248932		ysaA	0.19999		gph	-0.134708
b0100	0.0633206		flgC	0.0214194		yqiI	0.200318		ygjR	0.113421		bcp	0.155488		hybB	0.156623		can	0.0361314		yghR	0.178052		yfcP	0.24835		yebT	0.19947		hsrA	-0.134875
csdA	0.0633008		gpsA	0.0200431		nuoA	0.200261		ybbB	0.113262		pptA	0.154917		ydiS	0.156375		tap	0.0360659		fieF	0.177947		ttdR	0.248334		araJ	0.199289		gsiD	-0.135313
nfsA	0.0631512		bamB	0.0198352		allC	0.200256		yhcH	0.113243		arnE	0.154863		acnA	0.156262		xapB	0.0360527		fliN	0.17777		yahB	0.247691		ycgI	0.19889		pgsA	-0.136612
elaA	0.0630738		ybfF	0.0196059		yfaT	0.199995		paaK	0.112788		tilS	0.15484		thiD	0.156124		rutB	0.0360431		hisM	0.177698		htpG	0.247681		ccmB	0.198696		flgB	-0.137816
crl	0.0630321		yibN	0.0182524		b0105	0.199981		cycA	0.112673		napD	0.154829		ybdR	0.155094		flgH	0.035913		yjhW	0.177441		cmoB	0.24754		nupX	0.198201		ddpF	-0.13859
dacB	0.0628725		glnE	0.0182407		mdtH	0.199975		mdtA	0.112321		ydiM	0.154681		znuC	0.15502		cusB	0.0358081			0.176963		eutT	0.247255		ugd	0.198097		norR	-0.13898
yjjZ	0.0626704		emrD	0.0180141		ecnA	0.199808		fucO	0.112085		yidA	0.154427		xylH	0.154456		codB	0.0357981		sibC	0.176772		rbsK	0.247095		fadK	0.197599		aceE	-0.139854
ucpA	0.0625167		lpcA	0.0167804		sraB	0.199696		yjfM	0.112044		lsrB	0.154222		dapA	0.15399		miaA	0.0357076		ydjO	0.176758		yliE	0.246895		entD	0.197114		purT	-0.140597
modA	0.0625026		kdsA	0.0162946		lar	0.199685		lacZ	0.111922		yfeN	0.154106		xdhA	0.153986		frdC	0.0356675		metI	0.176387		ycgN	0.246836		yegU	0.197051		bglX	-0.14136
accA	0.062471		pheP	0.0158885		speC	0.199569		panD	0.111777		yfdT	0.153804		argB	0.153961		menE	0.0356491		yehW	0.176227		pdxY	0.246734		glpQ	0.196965		mazF	-0.142047
ybhC	0.0621868		fhuB	0.0152916		rplM	0.199042		priC	0.111022		mglC	0.153693		ansP	0.153853		exoX	0.0356311		betA	0.176188		dcuR	0.246329		rlmF	0.196405		cmk	-0.142392
ydfG	0.062065		treA	0.0149217		artP	0.198497		gltI	0.110806		glgX	0.153475		ccmF	0.153798		ydhB	0.0356076		ypjK	0.175934		phoE	0.245917		ybbP	0.196347		yeaE	-0.142921
yiaY	0.0620391		ddlA	0.0148263		nusG	0.198235		manX	0.11077		yfeW	0.153469		rhaS	0.153721		torC	0.0355903		ynaJ	0.175828		ybaS	0.245815		spy	0.196146		gltS	-0.142962
glcD	0.0619432		yniC	0.0101779		maeB	0.198058		nemA	0.110461		mak	0.153138		cbl	0.153638		ftsP	0.0355475		yjiX	0.175732		ymdA	0.245492		ubiH	0.196029		sufS	-0.143098
selB	0.0618907		ssrA	0.00884133		adiA	0.197878		nrdI	0.110376		garR	0.152812		ylbE	0.153047		rmuC	0.035445		dsdC	0.175706		yfbK	0.244818		paaH	0.195989		treA	-0.143765
uxuA	0.0617643		psuK	0.00875676		b0100	0.197694		fadJ	0.110329		cynS	0.152779		mdoG	0.153009		tauC	0.0353936		rseX	0.175415		yqfG	0.244712		ydjK	0.195888		glmM	-0.143846
ydeT	0.0616343		ilvI	0.00746763		yraK	0.197495		yadE	0.110328		ccmE	0.152489		fixA	0.152978		yjcZ	0.0353426		yahN	0.175306		ydfH	0.244504		astB	0.195854		tolA	-0.145952
apt	0.0616065		lsrB	0.00714488		cyoD	0.197343		ybfP	0.110279		mtr	0.152289		uup	0.152895		yagN	0.0353135		ydhK	0.17526		smg	0.243838		yeiR	0.195805		ebgR	-0.146776
pliG	0.0614228		lsrF	0.00586176		curA	0.19711		ackA	0.109905		rrrD	0.152199		gadX	0.152122		yjdM	0.035283		nikD	0.174757		sfmA	0.243614		fliY	0.195763		entF	-0.147292
bioH	0.0613851		dppD	0.00496021		yccS	0.196979		mmuP	0.1099		glnQ	0.152146		dgoT	0.152077		dacB	0.0352562		yfbP	0.174456		mngA	0.243436		hemL	0.195624		prkB	-0.148076
pptA	0.0612533		hisA	0.00457144		rhsD	0.196898		yfdS	0.109775		pinH	0.152085		csgE	0.152003		adiA	0.0352154		fsaB	0.174325		rfe	0.243389		yhfS	0.194773		uvrY	-0.149185
ispD	0.0612514		ryfA	0.00426959		yecD	0.196858		ilvB	0.109694		ygiA	0.151916		yfbO	0.151733		uspA	0.0350711		hycA	0.174312		accA	0.243231		yicO	0.194054		ubiE	-0.150741
yqhG	0.0611829		yegW	0.00217336		ptrB	0.196485		murI	0.109592		ydcJ	0.151816		nemR	0.151594		C0465	0.0350107		yfeC	0.174266		ygjH	0.243231		marA	0.193957		proV	-0.150917
lsrG	0.0611494		pgi	-0.00198681		lplT	0.196434		aroP	0.109376		nupC	0.1516		yejB	0.151434		casC	0.0350081		yddJ	0.17414		ybjP	0.243156		fadL	0.19392		putA	-0.150958
cbl	0.0611297		fabD	-0.00350236		mepS	0.196394		kduI	0.109343		rnt	0.151417		rfaD	0.150555		flgM	0.0350003		yihL	0.174102		yeeY	0.242597		galT	0.193866		atl	-0.15197
betA	0.06108		ssuD	-0.00362814		aes	0.196261		wcaB	0.109235		bglF	0.151265		prpR	0.150469		IS128	0.0349994		yaiL	0.17398		panC	0.242559		ilvL	0.193558		poxB	-0.153165
leuB	0.0610111		htrE	-0.00566539		fdoG	0.196101		trpR	0.108869		yfhL	0.151015		eda	0.150378		fdhF	0.0349738		selD	0.173872		tam	0.242222		ybfF	0.193265		ygcS	-0.154103
yrdB	0.0609932		glpF	-0.00706206		ybhJ	0.195957		menE	0.108794		ygdB	0.150767		glpX	0.150244		ybfK	0.0349339		ybjO	0.173793		hisB	0.241641		emrK	0.192408		betI	-0.154133
thrV	0.0609918		sbp	-0.00931889		yegP	0.195801		aer	0.108639		glmY	0.150688		gmhB	0.150193		kdsD	0.0348934		yfiR	0.173674		glgA	0.241263			0.192118		yidE	-0.154707
deoR	0.0609292		ddpC	-0.00958862		omrA	0.195778		mcrB	0.108556		wzzE	0.150144		fhuC	0.149739		wza	0.0347957		tdh	0.173299		omrA	0.240961		plsC	0.19198		rodZ	-0.156692
narY	0.0608987		thiF	-0.0100359		eutC	0.19572		purT	0.108377		yacC	0.149893		hyi	0.14909		mcaS	0.0347757		yhjB	0.173189		hisQ	0.240871		erpA	0.19183		nudG	-0.157288
yqiJ	0.0606645		flgA	-0.01068		deoR	0.195623		ppsA	0.108297		nuoG	0.149818		entH	0.14907		rhaD	0.0347748		pgl	0.173139		rcsB	0.239419		kdpA	0.191387		minE	-0.157416
ybhR	0.0601911		norR	-0.0113344		rsuA	0.195585		cydC	0.108068		ygeM	0.149795		hha	0.148973		sfsB	0.0347712		ycjO	0.173138		hslJ	0.239148		hisG	0.191324		fliS	-0.158656
ybeD	0.0600864		fixA	-0.0119047		yigM	0.195392		ccmD	0.107966		citT	0.14932		ydeP	0.148523		yhdJ	0.0346761		eptB	0.173105		sucC	0.238738		kgtP	0.190797		panE	-0.15883
glgX	0.0600698		yqeG	-0.0120416		cysA	0.195333		yabQ	0.107834		rfaH	0.149312		nanK	0.148405		srlB	0.0346145		argS	0.172569		ygbL	0.23859		glcB	0.190033		livM	-0.16196
pitB	0.0600284		udp	-0.0160957		ydeO	0.195238		ydfO	0.107722		yafU	0.149226		eutK	0.14823		ymfH	0.0346023		tyrA	0.1725		ftnB	0.238378		evgS	0.189987		trxB	-0.163434
yidR	0.0598096		rfbD	-0.0180745		ykgN	0.195174		caiB	0.107714		pheL	0.149207		mglB	0.148073		ycjW	0.0345888		rhaM	0.171853		dusA	0.238366		yadI	0.189889		gadC	-0.164614
wzzB	0.0597918		adiA	-0.0191483		macA	0.194997		ybaK	0.107487		fbp	0.149187		speC	0.148007		treA	0.0345558		alaE	0.171817		thiP	0.238297		xapB	0.189648		clsC	-0.164867
lsrA	0.0589823		yiaJ	-0.0196522		xylB	0.194837		yjiA	0.107427		thiP	0.149114		gspJ	0.147806		cysB	0.0344819		ybaV	0.171177		macA	0.23804		hisF	0.189206		fadD	-0.165103
smf	0.0588436		yfcF	-0.0202808		yjiP	0.194509		djlA	0.10712		yihR	0.149098		citD	0.147554		ydjF	0.0344314		yjeT	0.171157		sbcD	0.237844		agaR	0.188589		moaC	-0.16689
cfa	0.0588217		diaA	-0.0228739		ydiJ	0.194212		garR	0.106732		sdiA	0.148979		nudI	0.147475		artJ	0.034426		paaH	0.170962		cmtB	0.237768		mepS	0.188577		cpxA	-0.16701
ybjD	0.0587569		plsX	-0.0250131		betT	0.193973		nupX	0.106599		ampD	0.148935		fucO	0.147449		fabA	0.0344227		ygbK	0.170925		ybaT	0.237309		metR	0.188564		gpt	-0.167078
tnaB	0.0585103		wzxC	-0.0271933		frlR	0.193742		btuC	0.106463		ddpA	0.148797		setA	0.147359		symR	0.0343893		rpe	0.170876		entF	0.237095		yncD	0.188491		nuoF	-0.167286
ynfB	0.0584517		yieE	-0.0277725		cusC	0.193476		scpA	0.1064		rrlG	0.148782		yadE	0.147349		ycfZ	0.0343752		yeaP	0.170787		yncI	0.236756		nuoK	0.188483		fadE	-0.167511
atpB	0.0584383		lrhA	-0.0285135		ccmC	0.193333		glgS	0.106399		dppD	0.148736		frc	0.147174		yccA	0.0343158		gudX	0.170458		dsdC	0.236707		fliQ	0.188032		waaF	-0.167535
hyfB	0.0583635		ygjI	-0.0286667		nanS	0.192964		mngR	0.10581		yciF	0.148361		tag	0.146924		idnR	0.0339815		yrhD	0.170155		yobH	0.23661		gspF	0.187955		secB	-0.167608
cutC	0.0583333		cpsB	-0.0286997		mscM	0.192604		mhpB	0.105622		agaB	0.147844		yeeY	0.146649		ynjC	0.0339725		flgK	0.169733		allA	0.236578		ytfK	0.18791		rfbA	-0.168211
argK	0.0581677		mdfA	-0.0291611		aroG	0.192397		mhpT	0.105528		nikR	0.147723		yfjD	0.146283		mdtA	0.0339125		cobU	0.169705		rybB	0.236565		yebQ	0.187746		glmS	-0.168415
ung	0.0581545		murP	-0.0297624		cusS	0.192286		mioC	0.10511		yjjK	0.147411		cysQ	0.146253		ggt	0.0337895		uspC	0.169436		yfaU	0.235653		prlF	0.187603		nudC	-0.169079
yedE	0.0581086		ydcU	-0.0304839		rlmH	0.19219		yhjB	0.104606		yiaO	0.147194		icd	0.146184		yeeS	0.0337867		ybeM_2	0.169346		bcsZ	0.235255		atpC	0.187574		slmA	-0.169087
insD-3	0.0580141		msyB	-0.0328056		fliY	0.191745		yehK	0.104575		ffs	0.146963		grxD	0.145748		agaD	0.0337409		feoC	0.169261		yghF	0.234906		seqA	0.187007		ptrB	-0.169166
cmtB	0.0579675		astA	-0.0337102		acrR	0.191714		xylR	0.104318		dacA	0.146474		nikD	0.145584		alsB	0.0337134		yjgX_2	0.169153		nirD	0.234827		yzcX	0.18695		pncB	-0.169945
aslA	0.0578764		ypfG	-0.0354689		yhdJ	0.191676		dsbB	0.104232		yfiF	0.146189		rhaD	0.145414		yghT	0.0336175		yihX	0.16873		entC	0.234745		yihI	0.186559		murQ	-0.17005
ydjK	0.0578753		ycfT	-0.0356487		fabF	0.19158		yibG	0.104117		yaeP	0.14612		mhpR	0.145278		ydcO	0.0334928		yhcD	0.168456		mdlB	0.234321		yraJ	0.186533		nrfC	-0.172083
malG	0.0578621		pabC	-0.0367278		dacB	0.191419		envC	0.104048		zraR	0.146049		anmK	0.144686		ydfW	0.0334413		hicB	0.167631		yedP	0.23419		glgC	0.186414		nagC	-0.17401
murB	0.0578567		sstT	-0.0372472		ycaP	0.191261		yjbJ	0.103986		rffD	0.145737		recJ	0.144524		pflC	0.0333334		yehP	0.167246		exuT	0.233998		ymfH	0.186111		uraA	-0.174191
rhaM	0.0578266		sbmC	-0.0384234		rpmB	0.190943		tp2	0.103859		moeB	0.145563		yghO	0.143894		htgA	0.0333134		yfeA	0.167171		xthA	0.233685		yheS	0.185978		glnE	-0.174411
rffC	0.0577571		ybjG	-0.0395412		rhaM	0.190839		lysT	0.103788		mlaC	0.145281		envR	0.143857		b0309	0.0332617		paoB	0.167167		mltC	0.23356		dgoK	0.185742		cyoA	-0.175748
mak	0.0576814		malG	-0.0401354		yqiA	0.190824		ansA	0.103709		C0067	0.144327		psd	0.143824		bhsA	0.0332586		fumA	0.16693		yoaB	0.23293		ddpF	0.185622		artQ	-0.176174
holA	0.0575471		metC	-0.0404335		yahA	0.190517		polB	0.103521		queD	0.144265		yfcT	0.143446		sibC	0.0332515		ydeQ	0.166889		dgoT	0.2328		mipA	0.185552		kdgT	-0.177388
tesA	0.0575314		arcZ	-0.0405002		mazF	0.190367		yoaA	0.103301		ddlA	0.144147		fliQ	0.143392		yibG	0.0331964		setB	0.166842		yihL	0.232748		yahJ	0.185243		aldA	-0.177613
rutR	0.0575109		relE	-0.0421894		ybjI	0.190365		yrhA	0.103177		fes	0.143739		hyfI	0.143222		csgE	0.0331704		malT	0.166708		allB	0.232604		rdgB	0.18516		ppa	-0.178552
fruK	0.0574609		rbsD	-0.0425148		yhaV	0.190107		paaY	0.102713		ibpA	0.143462		uvrB	0.143183		yjbI	0.0330535		mrcB	0.16645		leuE	0.232439		yeeO	0.184845		fucR	-0.179334
yhcH	0.0574187		rseP	-0.0436333		pflB	0.189282		sroA	0.102158		xylF	0.143442		lptG	0.143051		folX	0.0330412		rsxG	0.166379		fimA	0.231869		agp	0.184834		nrdE	-0.179524
ybcW	0.0572387		yfaV	-0.0443164		yejH	0.189131		barA	0.102137		slmA	0.143233		tdcB	0.142763		kdpD	0.0329526		frvX	0.166186		yajI	0.231594		slyB	0.184829		epd	-0.179588
hcaE	0.0572273		talB	-0.0467671		chbB	0.188808		nuoA	0.101805		yidG	0.143177		mhpT	0.142633		cpxA	0.0329256		yheV	0.165992		hscC	0.231524		eutN	0.184701		mqo	-0.179945
ydbA_1	0.0571724		fdnG	-0.04784		cheB	0.188679		galP	0.101742		yahJ	0.143153		adhE	0.142418		yjdP	0.0328498		kptA	0.165732		mocA	0.23112		yfiF	0.18452		rffG	-0.180047
fdoI	0.0571627		cyoC	-0.0487433		hycG	0.188233		yjdM	0.101706		secE	0.143113		napG	0.141497		rstB	0.0328343		tilS	0.164854		ulaC	0.231076		fhuF	0.183597		trkA	-0.180607
sdhC	0.0570777		zwf	-0.0509378		fadR	0.188224		sbcC	0.101699		yddA	0.143052		yodB	0.141259		ybaS	0.0328237		yihY	0.164066		mobB	0.231065		yodC	0.183369		hslU	-0.18077
yqfA	0.0570266		nuoI	-0.0511776		ygiQ	0.18797		yiaF	0.101663		yigB	0.142609		ybaK	0.141209		yiaT	0.0328142		wcaB	0.164008		b0100	0.231031		caiB	0.183342		ivy	-0.18106
sapC	0.057001		phnD	-0.0533224		gabP	0.187857		yidL	0.101504		guaD	0.142539		mepH	0.141109		smtA	0.032739		cspG	0.16352		serC	0.230073		malE	0.182921		glk	-0.182487
btuB	0.0568968		ilvG_2	-0.054101		phoB	0.187744		yhbV	0.10102		yfeO	0.142252		basS	0.141047		hcp	0.0326656		rutG	0.163451		kbl	0.229563		sufD	0.182904		ygcW	-0.182593
solA	0.056604		ydcV	-0.0580714		pntA	0.187529		ydhV	0.101012		yehB	0.142013		amyA	0.140963		mdoC	0.0326625		ybhR	0.163451		envY	0.229404		sroA	0.18286		ydeE	-0.184598
molR_3	0.0559819		cusA	-0.0594414		fhuA	0.18739		ydcO	0.100734		ftsH	0.14157		dmsC	0.140468		astC	0.0326303		bioC	0.163417		lacY	0.229344		gspE	0.182417		dsdA	-0.18483
argC	0.0557289		ygcE	-0.0597745		yfiM	0.186785		yfcV	0.100613		yggU	0.141464		gcvR	0.139702		kefG	0.0326223		mdtA	0.163261		yaaA	0.229135		iaaA	0.182149		paaF	-0.185414
dapD	0.0556573		araE	-0.0603748		tatC	0.186731		hofQ	0.100468		yhfA	0.141296		yafL	0.139455		bglH	0.032615		yjjK	0.16312		serU	0.229069		aroK	0.181837		hcaD	-0.18562
galF	0.0556338		rfbX	-0.0617574		copA	0.186551		yhaC	0.100391		umuD	0.141144		glrR	0.139365		insI-3	0.0325149		abgR	0.16272		thiC	0.229041		modC	0.181559		lpxH	-0.185763
php	0.0554761		yiiR	-0.0641748		rnc	0.186545		rihA	0.100132		yddG	0.141095		serC	0.139014		aroC	0.0324855		cysW	0.162613		damX	0.22893		yqgB	0.181342		abgA	-0.187217
uidC	0.0553904		focA	-0.066142		mgsA	0.186396		ilvH	0.100064		yhbY	0.140783		yhjE	0.138767		yghD	0.0324581		potE	0.162319		yjiN	0.228849		flk	0.180683		paaC	-0.187363
ybcN	0.0552204		dacC	-0.0664778		yfhL	0.186275		yhhW	0.0999007		preA	0.140608		aspA	0.138601		aer	0.0324504		sufC	0.162135		cysM	0.228705		nuoM	0.180006		araG	-0.18838
yadC	0.0551989		mltC	-0.0686308		arnC	0.186126		rlmG	0.0995804		nth	0.140551		ugpE	0.138271		hisH	0.0323976		napA	0.16189		gatY	0.228703		ybgC	0.179425		znuC	-0.191234
yjbH	0.0551008		cirA	-0.0704714		cysU	0.186102		ybgC	0.0993977		kbaY	0.140358		lepB	0.138162		yidR	0.0323923		ydjY	0.161808		yhaK	0.228614		ypjM_2	0.178972		ppsA	-0.192421
yacG	0.0550565		aceF	-0.0704836		fixB	0.18608		bglF	0.0993197		yehL	0.139815		fabF	0.137985		livM	0.0323414		yjiR	0.161659		aegA	0.228517		aer	0.178967		efeO	-0.194369
epd	0.0550343		flgD	-0.0707896		fimA	0.185888		trpC	0.0989277		fliH	0.139761		adhP	0.137819		phoB	0.0323121		ybiP	0.161318		csrC	0.228227		hcr	0.178779		oppD	-0.196091
ynaK	0.0549285		tsx	-0.0712788		xseA	0.185316		kdsB	0.0988756		gspM	0.13976		mak	0.137664		arsR	0.0322193		mdoC	0.161179		rssA	0.22805		ybhJ	0.178737		wzyE	-0.196227
uhpT	0.0547186		treB	-0.0719982		yeiB	0.185281		ybiY	0.0988717		rtcR	0.139712		sdhD	0.137602		galP	0.0321614		yciC	0.160976		kdpA	0.228042		thiM	0.178488		ybiR	-0.197465
feaB	0.0547057		gltS	-0.0724808		ynjE	0.184748		yhdZ	0.0988608		ygiV	0.139689		cusA	0.137555		ydiJ	0.0320573		metR	0.160956		ydaQ	0.227123		ilvH	0.178196		ygaC	-0.197623
uidB	0.0545447		cmtB	-0.0744022		ybiY	0.184736		lpd	0.0987694		qseB	0.139572		bcr	0.13734		nikC	0.0319141		rhtC	0.160657		mhpF	0.226637		umpH	0.178093		cytR	-0.198949
tesB	0.0544808		ygeY	-0.0756221		mdtM	0.184462		flgC	0.0987564		ybjD	0.13896		lldD	0.137016		pspC	0.0318966		astC	0.160377		yajC	0.226192		yieK	0.177748		metJ	-0.199331
osmY	0.0543584		nanC	-0.0766742		hybO	0.184411		dtpB	0.0986025		ygcG	0.138826		hybC	0.136968		acpT	0.0318826		yqjC	0.160246		phoB	0.225785		agaC	0.177652		ttdA	-0.19992
rrsA	0.0543331		cysU	-0.0768624		potF	0.184357		rffG	0.0983354		yecR	0.138825		phnE_1	0.136387		ydeO	0.031792		ybdM	0.16023		greA	0.224534		grxB	0.1773		sgbE	-0.201931
yahG	0.0541987		dcuR	-0.0772923		cpsG	0.183631		ybcN	0.0982592		nemR	0.138797		yebT	0.136137		pppA	0.0316834		uidR	0.160142		cedA	0.22449		xapR	0.176997		caiE	-0.202677
rsuA	0.0541406		frvB	-0.0782074		ymcE	0.18332		hemY	0.0981635		ydiQ	0.138664		ygiV	0.135972		yebC	0.0316754		agaI	0.159725		pstC	0.224185		ybaQ	0.176934		malG	-0.202689
phoB	0.0540901		atpH	-0.0782109		yeeY	0.182927		elaB	0.097952		malT	0.138277		phoE	0.135552		yfdM	0.0315705		mhpF	0.159287		wbbH	0.223956		ratB	0.176706		otsA	-0.203808
yigP	0.0539193		bglA	-0.078573		moaE	0.182891		ulaR	0.0976051		ptsI	0.138223		paaX	0.135213		sbcB	0.0315297		kdsC	0.159263		plsB	0.223801		yggW	0.176406		ribA	-0.203882
ppdD	0.0539129		fdoI	-0.0787322		cdh	0.182794		yqcA	0.0975377		thiS	0.138173		queE	0.134503		yfjM	0.03148		dinI	0.159046		yedX	0.223719		dxr	0.17509		ftsE	-0.203966
ybbO	0.0538246		yjjN	-0.0796746		metG	0.182673		yadH	0.0975288		mhpA	0.138073		trxB	0.134373		gabP	0.0314364		purH	0.158608		rpoB	0.223649		rpiB	0.175059		hyfE	-0.206078
mqo	0.0537263		ybgF	-0.0826666		insH-11	0.182349		fepA	0.097303		narJ	0.13805		kbaZ	0.134304		ecnA	0.0313427		alpA	0.15846		elbB	0.223488		purB	0.174047		acpS	-0.207514
ttdA	0.0536514		putA	-0.0844377		hlpA	0.182332		yciV	0.0971798		accD	0.137914		yefM	0.133895		gspO	0.0312663		agaD	0.158447		cho	0.223416		ydcF	0.174024		yifK	-0.20885
acnA	0.0535257		nudG	-0.0853419		aphA	0.181726		csgE	0.0970803		bcsC	0.137832		mrcB	0.133696		mltC	0.0312322		ravA	0.158364		gatC	0.22311		fliP	0.173917		rarD	-0.208894
recJ	0.0532383		dmsC	-0.0856897		fhuF	0.181375		ybjP	0.0970336		mepH	0.137797		uxaA	0.133624		purP	0.0311715		ygfS	0.158089		pgaC	0.222974		ygdH	0.173911		torA	-0.208941
yfgJ	0.0532338		ptsG	-0.0866722		dadA	0.179892		fadE	0.0969532		proC	0.137756		malQ	0.133486		yibF	0.031076		ygdH	0.158013		yagB	0.22279		acpT	0.173886		diaA	-0.209494
mdtF	0.0530158		glpT	-0.0884583		ugpE	0.179847		cyoE	0.0968432		cbtA	0.137631		ycjO	0.133448		ampE	0.0310223		panZ	0.157999		amiA	0.222788		fliC	0.17376		yhcM	-0.210323
gstA	0.0529572		zraS	-0.0888386		pagP	0.179589		pspD	0.0968136		dnaA	0.137323		paaB	0.133421		lipA	0.0308616		psiE	0.15796		ycaK	0.222604		melB	0.17372		yhhS	-0.213178
kdpC	0.0529486		ygiW	-0.0890265		malX	0.179537		afuB	0.0967976		fepC	0.137317		yjjW	0.133321		argE	0.030729		yeaN	0.157952		yfdV	0.222548		yqaE	0.172728		eutH	-0.215989
wbbL_1	0.0529314		fre	-0.0899627		ydbD	0.179484		mscM	0.0966041		cmtB	0.136714		puuP	0.133109		glyW	0.0306737		yfbO	0.157929		ygcP	0.222471		ydfZ	0.172538		eutR	-0.216375
yhhS	0.0528681		waaQ	-0.0900882		aldA	0.179224		polA	0.096372		pyrI	0.136646		yciG	0.132254		nudE	0.0306586		lptF	0.157283		ybgQ	0.222382		ybhD	0.172417		ydjL	-0.217072
nfo	0.0526468		yggF	-0.093588		yheV	0.179068		dcuR	0.0961554		mdtL	0.136572		ydhZ	0.132239		codA	0.0306359		nepI	0.157232		corA	0.221912		tauB	0.172129		yihO	-0.217223
flhB	0.0525785		cusB	-0.0951165		sgrR	0.178947		mmuM	0.0960329		agaV	0.136167		minE	0.13194		modC	0.0306172		zapC	0.157206		narX	0.221697		uxuR	0.171927		galU	-0.217549
yecE	0.0525447		gntP	-0.0971692		moeB	0.178864		cysW	0.0952717		djlC	0.136059		rhaM	0.131729		ydiZ	0.0304044		ygiC	0.156822		osmE	0.221599		arnF	0.171896		fdnI	-0.219145
rffD	0.0521643		ratA	-0.0986461		yfaV	0.178481		nrdE	0.0950537		codB	0.136019		mfd	0.131696		yhbY	0.0303988		glxK	0.156769		yqjD	0.221244		gadA	0.171888		nfsB	-0.21919
puuD	0.0521112		tig	-0.099978		mscK	0.178427		mobB	0.0948983		rpoN	0.135964		yggS	0.131525		yeiB	0.0302401		puuE	0.156303		zraS	0.220947		frmB	0.171837		nuoJ	-0.220054
yobB	0.0519056		fliH	-0.100892		cspH	0.178289		slyB	0.0948766		recQ	0.135941		waaY	0.131215		mdlA	0.0301459		yggS	0.156241		ackA	0.22092		ydiT	0.171803		pta	-0.220432
ycgN	0.0518681		grcA	-0.101046		recN	0.178046		appY	0.0948744		tyrP	0.135369		tam	0.131205		holC	0.0301433		ydhZ	0.155948		ycfL	0.2209		ycgR	0.171699		cysQ	-0.220779
yfjZ	0.0518375		uhpB	-0.101558		pyrH	0.177937		fmt	0.0947641		ymfP	0.135224		ubiE	0.130978		rseA	0.030117		yfcF	0.155738		yfeY	0.220345		yeaE	0.171691		folD	-0.22086
purB	0.0516965		sfmC	-0.101575		glf	0.177827		fhlA	0.0947572		ydgI	0.135014		ahpF	0.130311		mhpA	0.0300632		gsiB	0.155693		ycfT	0.219685		mlaD	0.171596		fliD	-0.220919
astE	0.0512383		yddB	-0.101807		raiA	0.177824		rlmJ	0.094627		yghU	0.134487		bioB	0.129935		yjiG	0.0300063		yadH	0.155455		erfK	0.219683		pyrB	0.171464		lacY	-0.222288
safA	0.051209		pyrI	-0.102111		bhsA	0.177667		ydfJ	0.0945474		thiI	0.134452		yegT	0.12969		argI	0.0299227		omrB	0.15533		mazF	0.219381		rep	0.171377		deoC	-0.22273
gutQ	0.0511187		manX	-0.103636		ybhP	0.177504		sucD	0.0942421		glpE	0.134417		ydeT	0.129619		yraK	0.0298201		yqhC	0.155221		inaA	0.219221		sdhD	0.171364		glnQ	-0.223193
degS	0.051044		alsK	-0.104395		fnrS	0.177344		yhfX	0.0941858		trpR	0.134357		kdsC	0.129417		rob	0.0296473		ryeA	0.155166		cybB	0.219186		ybgF	0.171162		gutM	-0.224027
sufC	0.0508524		atpD	-0.105352		yeeN	0.177221		eutB	0.0939685		uvrC	0.134074		acrE	0.129298		cusC	0.0295406		dhaM	0.155067		ybdG	0.218426		yedV	0.171117		ccmB	-0.224266
yqeA	0.0508453		galU	-0.106897		yabI	0.177138		fimB	0.0938916		dgt	0.134021		tdk	0.128745		mdh	0.0295303		yfbU	0.154564		yahF	0.217904		cysU	0.171105		acnA	-0.228773
hipB	0.0501637		ompG	-0.107431		yfdO	0.1771		eutQ	0.0938911		fliL	0.13395		betT	0.128344		torR	0.0294923		pepT	0.154295		ydjF	0.217642		yejE	0.171097		epmB	-0.229563
ydcP	0.04988		sbcB	-0.1086		sgbU	0.177052		yfdH	0.0938355		ydeJ	0.133888		ddpX	0.12831		clsC	0.0294191		zinT	0.154213		panZ	0.217423		betI	0.170881		yigP	-0.229823
mtlR	0.0497147		uxuR	-0.109011		pgl	0.177037		alsC	0.0936896		xthA	0.133794		ycjU	0.128039		ubiX	0.029367		ycjU	0.153937		rnlA	0.217148		yfjR	0.170849		mdtB	-0.23143
C0614	0.0496976		yahA	-0.109806		prpD	0.177031		yhiS_1	0.0936495		fecC	0.133765		alaC	0.127811		mug	0.0292183		yfdO	0.153929		ygiW	0.216931		hcaC	0.17078		yhjC	-0.232612
rpoN	0.0496761		nagK	-0.109996		pstS	0.176984		ttdA	0.0934961		cynT	0.133731		csrD	0.127618		cca	0.0291763		lplA	0.153236		yhhT	0.216862		betA	0.170566		tyrB	-0.236127
relE	0.0496404		gcvR	-0.110453		ydeA	0.175888		yeaC	0.0932804		ytfP	0.133566		tldD	0.127501		fecE	0.0291746		lsrD	0.152801		fimI	0.21611		galF	0.170458		ybeY	-0.237027
rfaD	0.049598		cheB	-0.112956		gltD	0.175831		ydfZ	0.0932432		b1364	0.13291		ydhT	0.127337		nrfD	0.0289809		nupX	0.152763		yghQ	0.215882		ycjO	0.170436		ppk	-0.237931
exbD	0.0494688		nuoH	-0.113925		xdhB	0.175636		yoaI	0.0932427		fadB	0.132907		astE	0.126842		paaB	0.0289397		uidC	0.152186		waaQ	0.215326		groL	0.170419		ddpB	-0.238563
ybjL	0.049354		fadD	-0.114282		ppk	0.175588		oxyS	0.0930207		wbbH	0.132893		ycbC	0.1268		yfjI	0.0288503		ygiW	0.151435		ykgB	0.215281		hyfH	0.170354		murC	-0.239449
ydaN	0.0491966		nfsB	-0.114317		yahO	0.175355		arcB	0.092841		insD-6	0.132584		truB	0.12672		yiaK	0.0287649		higB	0.151337		tdcA	0.215136		baeS	0.169708		hypT	-0.23959
yecJ	0.0491204		oppC	-0.116351		trxB	0.17524		frdB	0.0926088		yncD	0.132366		ykgD	0.126689		yigL	0.0287007		gcvH	0.151307		pliG	0.21506		lomR_2	0.169261		ryfB	-0.239909
ymfA	0.0490646		betB	-0.116735		paaH	0.175021		fumC	0.092433		yciZ	0.132351		pstA	0.125906		csgB	0.0286945		ycjY	0.151207		ybiO	0.214877		murP	0.169237		yfcC	-0.242531
setB	0.0490221		cysN	-0.118966		yeaM	0.174695		mpl	0.0924305		argK	0.132325		ydeE	0.125804		ykfM	0.0286405		msbA	0.150638		yjdM	0.214835		pgaA	0.169201		speG	-0.244672
ydeQ	0.0487841		ydaN	-0.119831		nth	0.174657		yjiN	0.0923742		ptsG	0.132245		citF	0.125688		hspQ	0.028616		yliI	0.150598		yncK_2	0.214817		proA	0.169131		ycaC	-0.245003
holE	0.0487186		gatR_2	-0.120155		wzxE	0.174587		pfkB	0.0920613		yohD	0.132159		csdE	0.125557		ycfT	0.0285978		yiaN	0.150238		yfcF	0.214471		dmsA	0.168986		ybgP	-0.245103
C0719	0.0486525		dppC	-0.120857		yhgN	0.174568		lsrR	0.0919413		ybeX	0.132058		rsd	0.125019		fepA	0.0285097		ypeB	0.150233		arnT	0.214053		mobB	0.168926		fadB	-0.24598
dxr	0.0485655		clsB	-0.121998		tusC	0.174465		yfcS	0.0918821		ybdL	0.132011		ccmB	0.124912		erpA	0.0285047		kduD	0.15009		yjdI	0.214021		ychQ	0.16889		yqiH	-0.246173
aaeR	0.0484697		manA	-0.122207		ydhC	0.174462		gspD	0.0917854		tufA	0.131596		sapA	0.124829		ddpC	0.0284396		yghX_2	0.149607		hmp	0.213967		dsdC	0.168888		hycE	-0.246458
feaR	0.0484289		yhjE	-0.124693		gapC_2	0.17426		hisF	0.091507		prmC	0.131095		ydiR	0.124829		mlrA	0.0284358		tag	0.149572		oppD	0.213463		hda	0.16871		napC	-0.252024
wzc	0.0483633		ldrD	-0.127694		sdaA	0.17393		asd	0.0912045		fdx	0.130922		ycgJ	0.124756		ygjP	0.0284239		ptrB	0.149508		nuoB	0.213238		phoQ	0.168508		recJ	-0.252099
dauA	0.0480576		frwD	-0.127904		murJ	0.173737		yfaL	0.0909007		yeeS	0.130899		phnP	0.124342		rfaD	0.0284111		sufS	0.148612		glcD	0.213137		rsxA	0.167952		yjcE	-0.257103
fimB	0.0480031		lldR	-0.128183		yadK	0.173465		ygaZ	0.0908451		ubiD	0.130812		curA	0.124302		yncK_2	0.0283884		ykgG	0.147702		yqeA	0.213044		nemR	0.167892		cueO	-0.257207
hns	0.0476993		slt	-0.129399		ygfZ	0.173216		ycdZ	0.090642		cysN	0.130799		fadD	0.124275		mepM	0.028346		nrfC	0.147454		yceF	0.212303		gudP	0.16778		wcaA	-0.258031
frvB	0.04761		ppk	-0.12944		accA	0.173163		gspF	0.090055		btuD	0.130615		ygcQ	0.124158		ybcI	0.0282392		yagB	0.147198		sdhC	0.212203		fadE	0.167618		glxR	-0.258455
gadC	0.0475935		osmE	-0.12976		apt	0.173149		yecJ	0.0897943		oppA	0.130196		aroH	0.124049		talA	0.0282287		gltB	0.14716		gadE	0.212138		tomB	0.16758		rfe	-0.258683
dtpD	0.0474965		rpiB	-0.130995		yohP	0.172686		sufC	0.0896678		rfbA	0.130154		yneH	0.123956		fliR	0.0281705		nikE	0.146947		ompT	0.212072		ratA	0.167407		mog	-0.260366
insN-2	0.0473401		prc	-0.131024		yjbT	0.172523		intQ	0.0894351		pbl	0.129888		fepD	0.123735		bcsC	0.0281572		yhbQ	0.146821		etk	0.211939		rfbD	0.167341		ytjB	-0.260522
eutN	0.0472527		nuoK	-0.131582		mltD	0.171891		kbaZ	0.0894107		iscR	0.129826		nlpA	0.123699		rsmD	0.0281484		metE	0.146789		glyS	0.211925		pspC	0.167169		tdcE	-0.265801
recT	0.0472408		csdE	-0.132925		ybfO	0.171886		nrfE	0.0893696		yahH	0.129764		rcnB	0.123572		surA	0.0281391		yhbS	0.146734		iraD	0.211741		nrfA	0.167076		idi	-0.265957
omrA	0.0470769		rffG	-0.133823		cusR	0.171395		adiY	0.0892757		ynfK	0.129644		tauC	0.123269		dinD	0.0281345		gmhB	0.146385		yagM	0.211301		udk	0.166564		rffE	-0.266271
yiaF	0.0470282		tppB	-0.134429		waaP	0.171335		acrA	0.0892501		fldB	0.129578		ampG	0.123119		dapD	0.0281334		cobB	0.146275		parE	0.211106		priA	0.166554		argO	-0.268052
yhhT	0.0470165		cybC	-0.134898		cyoC	0.171328		yfbN	0.0891965		yiaD	0.129427		yeaE	0.122967		yphC	0.0281025		ryjB	0.146065		nfi	0.210598		bfr	0.166325		kdpC	-0.268068
metF	0.0463376		pntA	-0.135494		yghQ	0.171221		hdeA	0.0885545		glpD	0.129303		cfa	0.122924		allD	0.0280433		yphG	0.145777		recG	0.210052		tisB	0.166122		mdoC	-0.270475
yhcM	0.0461974		ybdO	-0.135719		ygfM	0.17121		appB	0.0884927		ylbG	0.129282		potA	0.122834		acpH	0.0280404		eutE	0.145772		acrF	0.209886		ptrA	0.16601		chiP	-0.270893
yjaB	0.0461863		rfbA	-0.136347		aas	0.171182		motB	0.0884844		rodZ	0.129115		bacA	0.122763		recC	0.0280027		eptA	0.145648		yqhD	0.209881		rhaA	0.165801		dsdC	-0.271014
yfiM	0.046089		basS	-0.137407		yhdU	0.171122		deoB	0.0884174		ylaC	0.129003		yibN	0.122642		yffS	0.0279716		talA	0.14556		nuoE	0.209621		bglB	0.165731		ryjB	-0.271325
nadE	0.0460478		hyaC	-0.138269		yiaG	0.170796		dcp	0.0883988		hydN	0.12899		nfsA	0.122316		dosC	0.0277227		purL	0.145227		dhaL	0.209059		glnH	0.165354		mngR	-0.271355
emtA	0.0459968		nuoB	-0.141151		eutK	0.170638		putA	0.0881568		tabA	0.128503		crl	0.122264		crp	0.0276719		dusC	0.145184		ydcT	0.20894		ygbN	0.165027		argD	-0.271386
rsmG	0.045992		sufD	-0.141552		insB-5	0.170272		prpD	0.0880919		rutG	0.128314		zraS	0.12194		ydhS	0.0276716		tusB	0.14503		abrB	0.208902		spf	0.164774		cynR	-0.273067
rtcA	0.0459594		citD	-0.14501		setA	0.169948		yjtD	0.0877827		ypaB	0.128224		ppk	0.121892		gspH	0.0275937		fhuC	0.145017		allE	0.208864		cmtB	0.164301		nanT	-0.27371
pyrD	0.0458222		nuoF	-0.147398		frmB	0.169732		ypjD	0.0874172		fimE	0.128197		yhhS	0.121618		yhiK	0.0275636		yjfK	0.144766		rybA	0.208799		fis	0.164101		ptsN	-0.274558
mdlB	0.0457507		aceE	-0.150031		ydeJ	0.169725		dsdC	0.087324		gapC_1	0.127874		moaE	0.121603		rsd	0.027563		rluE	0.144374		mdoB	0.208647		yfbS	0.164021		ebgA	-0.27548
ampD	0.0456628		moaD	-0.151167		Phantom Gene	0.16958		argE	0.0868628		murQ	0.127564		asnA	0.121015		rhsC	0.0275574		ycjT	0.144038		alsC	0.208636		ycjX	0.163915		xylF	-0.276971
yodB	0.0456409		ybgD	-0.152198		aroK	0.169439		ymjA	0.0868466		yodD	0.127482		yahE	0.120783		slmA	0.0273941		menC	0.14384		rttR	0.208596		yhiS_1	0.163824		hycD	-0.278141
yecD	0.0456067		nuoN	-0.1527		yibQ	0.169341		rutA	0.0867723		holB	0.127106		garK	0.120652		ydiE	0.0273838		yfcO	0.143723		pgi	0.208535		hcaE	0.16368		mlc	-0.278343
phr	0.0454198		yqjF	-0.153322		dnaN	0.169205		speB	0.0867212		thyA	0.12683		bglJ	0.120615		ccmB	0.0273827		renD	0.143693		fic	0.208087		ybeR	0.163402		dppC	-0.281101
hyaF	0.0451957		yifK	-0.155339		osmC	0.169069		htrE	0.0866871		sibD	0.126594		hycA	0.120573		xseA	0.0273397		ydbJ	0.143229		gpsA	0.207781		fcl	0.163035		nrfE	-0.281529
soxR	0.045056		oppA	-0.157442		bamE	0.168925		mltD	0.086565		frc	0.126506		maeA	0.120473		sgcX	0.0272971		ybhL	0.143228		ymgF	0.207729		ybaK	0.162768		kch	-0.283957
dcyD	0.0449647		sucC	-0.157944		arsB	0.168892		psiE	0.0865463		uacT	0.126288		cusB	0.120472		menI	0.0272402		yjbI	0.143002		glpT	0.207723		udp	0.162652		hycG	-0.289515
mhpC	0.0448356		yeaR	-0.158992		yodD	0.16846		yijE	0.0863894		oppB	0.126227		hyfA	0.120329		yfdH	0.0272196		ymgC	0.142925		rhtA	0.207719		menE	0.162576		sapB	-0.289615
yjhB	0.0447944		qseB	-0.161536		speG	0.168296		rraA	0.0861869		tatA	0.126014		yneF	0.120245		putP	0.0272031		narH	0.142833		yjiX	0.207578		livF	0.162476		pgaC	-0.29051
dgkA	0.0441302		mdoB	-0.161767		yagM	0.168259		fic	0.0861216		lfhA	0.125895		flgJ	0.119899		atpE	0.0271708		ypjB	0.142794		wzzE	0.207293		flgK	0.16214		fliM	-0.290903
tfaE	0.0441108		eutD	-0.163561		dppD	0.168233		glpA	0.0859068		entD	0.125688		entA	0.119756		ybeM_2	0.0271274		murD	0.142783		betA	0.207256		galK	0.162106		yhcF	-0.291504
yhbQ	0.044088		rutG	-0.163627		zapD	0.168129		lnt	0.0858888		pykF	0.125487		ecpC	0.119484		kdpA	0.0270803		ybaE	0.142521		nrdH	0.207097		rhaR	0.16207		matP	-0.294947
nudK	0.0440698		gutQ	-0.164848		yegU	0.168128		rutC	0.0858867		hycE	0.124796		ydcU	0.11941		ybhA	0.0270794		fepE	0.142468		proC	0.206893		folP	0.161912		ubiC	-0.29704
ryfD	0.0440676		plsC	-0.166832		sroE	0.168071		yhdU	0.0857864		yciM	0.124749		rsmH	0.119352		yphF	0.0270745		elaD	0.142326		speB	0.206779		agaW	0.161875		ackA	-0.29718
isrB	0.0440521		bdcA	-0.167119		yjiL	0.167083		nlpC	0.0857573		purF	0.12452		yeiI	0.118922		rbsK	0.0270717		yphE	0.142302		yhdX	0.206775		hypC	0.16185		gltK	-0.29909
ybcQ	0.0439279		cydC	-0.167842		queD	0.166719		yiiD	0.0857256		fic	0.124307		yjbB	0.118619		mscS	0.0269996		argU	0.14227		nrfC	0.206434		ybbB	0.16119		yhjY	-0.302414
serC	0.0437397		cheW	-0.175335		nagC	0.166674		otsB	0.0856845		pta	0.124032		tktB	0.118376		cas2	0.0269794		hisP	0.14197		yhhJ	0.206336		fdnG	0.161113		napB	-0.302634
ydeO	0.0435736		ptsI	-0.176153		alsA	0.166657		bglJ	0.0856721		yghA	0.123931		fhlA	0.118225		ydbJ	0.0269724		tpke70	0.141714		ybaQ	0.206095		sdsP	0.161097		fabG	-0.304291
hisB	0.0434957		hisQ	-0.176581		nadE	0.166178		yhiJ	0.08556		flgB	0.12377		ptsG	0.118221		puuB	0.0269378		yibJ	0.141691		cobT	0.206013		fixC	0.160936		ynfH	-0.309305
dgoA	0.0434072		lpd	-0.177646		yafP	0.166013		yejA	0.0854278		yeaO	0.123748		glpT	0.1182		ulaB	0.026789		ppsR	0.141584		yoaH	0.205975		rfbC	0.160714		rihA	-0.314971
micF	0.043233		agaS	-0.179647		yciK	0.165684		yliL	0.0854075		envC	0.123704		glpK	0.118012		yciG	0.026779		ydhV	0.14148		yeaR	0.20578		gutM	0.160625		cheY	-0.319414
cstA	0.0429765		dadX	-0.180603		aceK	0.165523		glnP	0.0853674		proX	0.123291		hdfR	0.117821		yqfB	0.0266146		cbpM	0.141355		cyaA	0.205582		ymdB	0.160561		araJ	-0.323221
sucC	0.0429118		ung	-0.188369		clcA	0.16524		lexA	0.0853314		yfdS	0.122755		yeaV	0.117696		mutH	0.0265261		yoaH	0.141159		pspC	0.205284		ynfO	0.160494		cstA	-0.325659
tolC	0.0426879		yaiU	-0.190362		rbn	0.165235		asnB	0.0852764		yhgA	0.122671		mazF	0.116702		yegI	0.026438		dnaQ	0.140883		ugpA	0.205063		tdcF	0.160361		prlF	-0.326098
xylE	0.0426691		xylH	-0.191554		bcsZ	0.164634		yfdV	0.0852069		ais	0.122385		thiM	0.116595		yhjH	0.0264223		ymjC	0.140872		smrB	0.205058		pheP	0.160356		mutT	-0.326914
Phantom Gene	0.0426288		citT	-0.192226		hypF	0.1646		ybfC	0.085159		dcuS	0.122361		mutY	0.116579		rsxC	0.0264207		tyrR	0.140675		cusR	0.204851		nanC	0.16012		gatB	-0.327482
mlc	0.042503		msbA	-0.1927		ydjJ	0.164444		chaC	0.0849502		nirD	0.122037		higA	0.116363		gnd	0.0262668		arnF	0.140124		sra	0.204614		thrC	0.159531		rdlD	-0.32944
aspV	0.0421539		gpmM	-0.195892		rplX	0.164243		zur	0.084909		prmA	0.121986		ydaM	0.116349		hokE	0.026258		deoD	0.140111		gmr	0.204358		nudC	0.159425		minD	-0.333303
manX	0.0421058		arnD	-0.196073		ybfG	0.164169		soxR	0.0848453		yfiB	0.121685		ftsI	0.115881		yhaM	0.0262102		yjeF	0.140098		yiaL	0.203971		ghrA	0.159183		cutA	-0.33585
rimJ	0.0420864		dpiA	-0.197483		trmJ	0.16416		yfcL	0.0848278		arsB	0.121604		csrB	0.115834		brnQ	0.0260781		ompL	0.140059		yfdX	0.203947		ydgJ	0.159149		yafD	-0.337171
yicR	0.0419211		fucK	-0.198655		yohK	0.163914		fhuF	0.0848052		hyaF	0.121593		chaA	0.115785		rfaH	0.0260642		ybbD	0.13993		garD	0.203932		ybdZ	0.159027		sdaC	-0.338444
gatR_2	0.0418058		ygdQ	-0.199561		nlpD	0.163798		ydjM	0.084621		casA	0.121518		torS	0.115777		atpC	0.026055		yeiI	0.139885		leuS	0.203246		yicL	0.158446		mepA	-0.342714
cspA	0.0417829		thiE	-0.19973		fabZ	0.16354		yhdX	0.0843521		ybaV	0.121435		astB	0.115669		ydeN	0.025895		yhaC	0.139791		tatB	0.203238		gph	0.158443		araC	-0.345447
hyfI	0.0417017		yrbG	-0.200083		yfgG	0.163338		rplN	0.0840094		tauD	0.121145		shiA	0.11542		lacA	0.0258474		thiH	0.139655		hybO	0.203037		tktB	0.158277		arcZ	-0.346001
valW	0.0416272		xdhB	-0.201942		ycdZ	0.163295		pdhR	0.0840019		dbpA	0.121119		puuE	0.115284		yhdX	0.0257776		smpB	0.139313		nudE	0.202514		hybB	0.158031		cysD	-0.348506
mutL	0.0416254		deoB	-0.202218		livK	0.163099		arpB_1	0.0838467		yohH	0.120693		lnt	0.114876		ypdI	0.0257775		pitB	0.139203		waaU	0.202279		yqjH	0.157432		galT	-0.349939
rmuC	0.0414186		actP	-0.202425		ascG	0.162506		idnT	0.0837616		rbfA	0.120536		ppc	0.114828		ytfH	0.0257669		wrbA	0.138971		hybC	0.202212		nfo	0.157202		mdoG	-0.35334
pinR	0.0413253		eutR	-0.203779		oppB	0.162398		yqiI	0.0836454		paoB	0.120536		gltL	0.114636		gatD	0.025735		ypjJ	0.138871		znuC	0.202158		scpC	0.157059		narX	-0.359681
purA	0.0412712		ynbA	-0.20397		rof	0.162359		puuR	0.0833271		paaI	0.120333		fimA	0.114168		efp	0.0257035		gsk	0.138722		paaA	0.202049		yghO	0.156434		yfgJ	-0.360033
btuR	0.0412539		yafU	-0.204065		ybaE	0.162249		flgD	0.0832491		hofQ	0.120143		yihS	0.113874		yaiV	0.0256724		yiaG	0.138567		ulaF	0.201715		yicJ	0.156417		oppF	-0.360796
yddB	0.0410719		ugpC	-0.204309		yfaZ	0.161977		fimC	0.0829654		pheU	0.120075		yecS	0.113227		fliD	0.0256177		mngA	0.138331		yehS	0.201636		lacI	0.15609		lysP	-0.365262
yffP	0.0410087		fhuA	-0.205385		pitB	0.161976		nudE	0.0829348		ttdA	0.120016		fliY	0.112509		insB-7_1	0.0255383		ilvC	0.138291		exbD	0.201324		trxB	0.155879		hemY	-0.368999
rihB	0.0409446		ytfQ	-0.206783		yghD	0.161851		micM	0.0827374		yhgE	0.119962		rbsD	0.112498		yghG	0.0255009		kbl	0.138202		gnd	0.201183		ypdC	0.155657		ydiP	-0.369032
ybbD	0.0409006		yajR	-0.208849		rfbD	0.161629		nhaR	0.0825293		hscA	0.119374		yecH	0.112436		secB	0.025476		ydiZ	0.138118		mgsA	0.200909		ybcD	0.155476		ddlB	-0.37209
sokB	0.0406914		ulaG	-0.209406		gldA	0.161246		ydaQ	0.0824697		ycgB	0.119362		nagB	0.112067		yneM	0.0253479		acpT	0.138018		fliK	0.200857		ushA	0.155303		cynS	-0.372697
kefC	0.0405652		ebgC	-0.210289		bamD	0.160966		omrA	0.0823354		hokD	0.119304		yncG	0.112033		wcaJ	0.0253255		yigE	0.137905		ydcU	0.200733		groS	0.154889		abgT	-0.373608
bcsB	0.0404002		rffE	-0.210903		rlmC	0.160947		trkH	0.0822293		mdtH	0.119163		ftnA	0.111822		narW	0.0252756		insK	0.137834		ldcA	0.200558		amtB	0.154802		tppB	-0.373833
ade	0.0403276		ydeP	-0.211239		rrlG	0.160763		ybaL	0.0821705		entF	0.118674		dacA	0.111668		rhtB	0.0251967		gspK	0.137609		ybeQ	0.200501		fucO	0.154767		nuoN	-0.375763
yehD	0.0402578		cdd	-0.213022		yigZ	0.160752		mlaF	0.0820721		yedV	0.118519		yhbT	0.111571		yigG	0.0251757		yehX	0.137366		speF	0.200219		npr	0.154738		proY	-0.376866
ompA	0.0400193		epd	-0.216506		ubiX	0.160549		xdhA	0.0819538		ynfL	0.118422		xylB	0.111402		fucR	0.0251457		hyuA	0.13725		cvpA	0.20012		yadH	0.154683		gsiC	-0.37871
yhgA	0.0399876		deoR	-0.220078		phnD	0.160492		melB	0.0817264		yfcI	0.118398		yqiB	0.111162		yhaJ	0.0251331		baeR	0.136136		yibL	0.200004		ynbB	0.154639		lpxD	-0.381083
yghS	0.0395625		ybiR	-0.220151		folA	0.159775		ynjI	0.0817263		eaeH	0.11821		ycjF	0.11108		yliI	0.024876		yijE	0.136069		gatA	0.199965		narL	0.15452		pdxK	-0.387149
yjhQ	0.0395546		ydhJ	-0.222032		pgpB	0.159083		tmcA	0.0815663		fecI	0.118126		glgA	0.110218		yjeH	0.0248369		ygaZ	0.136056		rnb	0.199792		ynfB	0.154505		amiC	-0.391548
ycaC	0.0394866		kch	-0.222078		yfgM	0.159014		malM	0.0814582		ompL	0.118029		lpcA	0.109867		sdaC	0.0247739		nfsB	0.136024		yhgF	0.199445		nuoB	0.154389		ycaM	-0.403253
grcA	0.0392961		entE	-0.225596		ydjN	0.15894		ltaE	0.0810646		ruvB	0.117858		hisQ	0.109737		yecA	0.0247406		yoeF	0.135846		yfiP	0.198231		menI	0.15437		ribD	-0.406875
ytcA	0.0392755		zraR	-0.226949		atpH	0.158757		ykfK	0.0808986		waaQ	0.117583		etk	0.109539		hofC	0.024732		ulaC	0.135845		yafL	0.197267		nuoF	0.154342		cheB	-0.428431
arnC	0.038934		queD	-0.227655		yjcZ	0.158747		ybcF	0.0808623		yiiD	0.117572		ampC	0.109538		yecJ	0.024707		yjhX	0.135665		bdm	0.196727		yciH	0.154281		hupB	-0.428567
yhiM	0.0387823		ycbL	-0.229667		nemA	0.158331		gapC_1	0.0808306		yhjD	0.117475		bglH	0.109416		aroD	0.0246685		yiaU	0.135605		tusB	0.196551		yiiD	0.154257		proW	-0.434625
ampG	0.0385809		fhuD	-0.229751		ytfI	0.158166		ytjC	0.0807833		b0105	0.117193		phoQ	0.109139		agaV	0.0244425		yciE	0.135416		ynfL	0.196516		lacZ	0.154061		aroH	-0.435716
entF	0.0385803		gadX	-0.230875		yjbG	0.158074		yjfK	0.080631		yagN	0.117041		glcF	0.10897		yedW	0.0243459		gpmM	0.135231		ybhL	0.196395		aceK	0.154038		rbsK	-0.436489
truD	0.0385614		ubiD	-0.239179		mdoC	0.158061		arcA	0.0800286		nfuA	0.116911		mltD	0.108769		ydjG	0.0243318		flgF	0.135228		yjeF	0.195987		ilvD	0.15391		cydB	-0.437818
hycF	0.0383773		sugE	-0.241597		yfjU	0.157542		secF	0.0796967		b3254	0.116887		yjbF	0.108594		yjhF	0.0242843		argB	0.135217		yjjW	0.195415		bcp	0.153817		uxaA	-0.451921
ecpE	0.0383393		rarD	-0.242978		nusA	0.157289		yicL	0.0795555		gspF	0.116878		alaE	0.108285		thiD	0.0242591		hemF	0.135006		atpA	0.195132		aroH	0.153771		secA	-0.458484
hscC	0.0382983		thiK	-0.243427		frdD	0.156958		sucB	0.0791653		ygeI	0.116857		yrhD	0.107923		tpx	0.0242215		pgaA	0.134912		yccS	0.195117		ymgF	0.153541		lgt	-0.461773
mcbR	0.038202		phoQ	-0.244873		ydcZ	0.156929		glcG	0.0790523		adhE	0.116768		ytjB	0.107676		nuoC	0.0241681		fhuB	0.134781		ybdK	0.19496		pbpG	0.153388		ftsW	-0.46569
proB	0.0381576		yfbS	-0.244976		yqiG	0.156662		ygjQ	0.0789606		aroE	0.116768		bglG	0.107611		xanP	0.0241403		hflX	0.134647		ygcN	0.194477		ugpA	0.152905		potH	-0.468277
yncD	0.038102		tatE	-0.245262		bcp	0.156468		clcA	0.0789248		sroC	0.116581		ompL	0.107598		sgrS	0.0241158		ccmF	0.134605		lsrC	0.194308		yfcT	0.152696		murD	-0.472834
atoA	0.0379721		idnT	-0.245656		mnmE	0.156293		yoeB	0.0788267		yqcA	0.116229		nupX	0.107368		ysdC	0.0240875		ybcI	0.133775		rihA	0.19416		uhpA	0.15267		fryC	-0.473775
ryeB	0.0379641		kbaY	-0.245906		mltC	0.15623		yodD	0.0785221		yebS	0.115954		yeiB	0.10719		ydfD	0.0240585		paaC	0.133352		accD	0.194116		motA	0.152609		pepB	-0.47639
yfcC	0.0379424		nuoA	-0.24685		nrdF	0.155896		yebK	0.0780448		tdcD	0.115896		tppB	0.106549		yfcO	0.0239915		pgm	0.133334		wbbK	0.194069		sppA	0.152549		xylB	-0.500459
rybA	0.037909		cysE	-0.247308		yehI	0.155807		pptA	0.0778297		ymfE	0.115864		uidC	0.105935		purH	0.0239379		uhpC	0.133289		uhpB	0.193814		mnmA	0.152135		yidQ	-0.506357
fliJ	0.0378134		malX	-0.247908		emrD	0.155761		uidC	0.0777864		wcaB	0.115788		rof	0.105646		thiF	0.0238594		yfbS	0.133012		apbE	0.193573		betT	0.151768		bglA	-0.506469
ydjX	0.0374296		gldA	-0.247956		yafQ	0.155568		marB	0.0776921		yjdI	0.115731		djlA	0.105367		yddW	0.0237731		sppA	0.132945		nuoH	0.193547		insH-11	0.150964		rhaS	-0.543201
lpxP	0.0373623		mglC	-0.248931		torZ	0.155564		lldD	0.0776756		ydeQ	0.115696		focA	0.105133		ybcF	0.0235882		chaB	0.132624		purN	0.19334		bolA	0.150939		dmlR	-0.551737
yibJ	0.037174		rffM	-0.250745		ecpD	0.155342		tdk	0.0775435		ydjE	0.11557		hcr	0.104694		emrK	0.0234141		yciG	0.132198		hycF	0.192789		ydhP	0.15093		ydbD	-0.591788
phnG	0.0369249		bcr	-0.254412		flgA	0.155208		preT	0.0774811		leuO	0.115502		cydC	0.104583		yheO	0.0234136		yidR	0.132181		ytcA	0.192507		ybfP	0.150917		mraY	-0.627984
ytfK	0.0369048		rhaA	-0.254422		yecH	0.155184		selD	0.0773905		ycgZ	0.115424		srlA	0.104497		metF	0.0233949		yidG	0.13203		yihA	0.192069		essD	0.150695		murF	-0.652157
yffM	0.0366846		yhjG	-0.255273		gatC	0.154943		ypeC	0.077302		hslO	0.115273		dhaM	0.104429		tppB	0.0233347		ydaM	0.13194		ninE	0.192033		azoR	0.150656		fabH	-0.685738
norW	0.0365273		tnaA	-0.25674		rcbA	0.15487		lpxP	0.076951		yihQ	0.115059		treF	0.103967		mreD	0.0230828		yijD	0.131815		hycA	0.191684		yjgL	0.150574		proB	-0.706067
nadR	0.0361422		caiB	-0.257564		bglH	0.154842		gmr	0.0768167		gadX	0.114948		ilvE	0.103946		elaD	0.0230792		ynfE	0.131535		hyaA	0.191604		phnE_1	0.150568
ykgJ	0.036112		yhfW	-0.258725		yfhG	0.154753		clcB	0.0767215		yihN	0.114879		srlB	0.103624		moaD	0.0229215		bglB	0.131431		fruK	0.191189		ndh	0.150415
mdoB	0.03603		wzb	-0.260088		yqcE	0.154604		ymdE	0.0763518		elaB	0.11487		thiG	0.103575		napB	0.0228998		gntP	0.130977		yibN	0.191144		rlmB	0.15031
minC	0.0359313		mppA	-0.260163		malY	0.154603		dmsD	0.0762512		ybaQ	0.114848		entE	0.103242		torT	0.0228096		ynbD	0.130708		pppA	0.1911		xylE	0.150203
hycD	0.0359196		fliI	-0.261272		yehY	0.154273		ilvE	0.0756538		rplQ	0.114791		aroB	0.102774		bglB	0.0228088		yfdM	0.130679		ydeP	0.190578		rsxE	0.150028
fliA	0.035691		cyoA	-0.26132		yjeH	0.154247		yidP	0.0753417		yfiH	0.114633		rutR	0.102517		yidK	0.0227794		rplS	0.130627		phnM	0.190419		yciN	0.149903
garK	0.0356394		ydcI	-0.264948		selD	0.15388		ryeA	0.0752012		yqfA	0.114576		mobB	0.10251		acrE	0.0227415		paaZ	0.130455		glpG	0.190005		uidC	0.149881
nikC	0.0352393		glpD	-0.265738		ygiL	0.153709		ycjV	0.0748229		narQ	0.114568		truA	0.1021		gmr	0.0227003		nfrB	0.130161		ygbN	0.189714		cspI	0.149857
ptrB	0.0352132		ade	-0.26985		cirA	0.153536		gltB	0.0747799		dxs	0.114526		ybbC	0.101943		ugpE	0.0225649		rffT	0.130103		gltI	0.189446		ybiB	0.149805
xseA	0.0351657		ygeV	-0.270267		ccmF	0.153363		iaaA	0.0745397		yqjI	0.114496		proP	0.101941		tonB	0.0225306		uidB	0.130098		tmk	0.18928		ynbA	0.149714
metI	0.0349168		ompT	-0.272485		ynaK	0.153319		ydfH	0.0745186		yfaY	0.11435		metC	0.101662		lpxT	0.02244		insB-3	0.129973		artP	0.189103		ybhG	0.149389
ytfF	0.0348439		sseA	-0.272491		phoH	0.152963		yhbS	0.0744686		hsdS	0.114096		fruK	0.101399		ysaA	0.022439		thiK	0.129963		ybjE	0.188177		yjhC	0.149017
yqaB	0.0347133		ftsY	-0.272683		ygiA	0.152629		yjgW	0.0744118		frlA	0.113907		yeaR	0.101208		kbaZ	0.0223792		yafD	0.129667		uspC	0.188133		gsiA	0.14877
ninE	0.0346907		dtpB	-0.274059		pdhR	0.152585		ompX	0.0743857		uhpT	0.113738		yihP	0.10098		nfsB	0.0223653		mgsA	0.129571		yeaV	0.188077		yidD	0.148758
yhdP	0.034662		fcl	-0.274353		ydhK	0.152474		potI	0.0739382		ivy	0.113606		pepP	0.100736		yajQ	0.0222823		manZ	0.129456		ychA	0.18775		sfmF	0.148744
adhP	0.0345375		glgA	-0.276003		wzzB	0.152325		yraN	0.073403		bolA	0.11354		kduD	0.100621		ygiL	0.0221837		flgC	0.129335		yjhX	0.187501		gnd	0.148662
glxR	0.0345343		folM	-0.28102		hybD	0.152005		tisA	0.0730566		dacB	0.113382		dmlA	0.100615		yaiO	0.0221638		ymfM	0.129326		fucI	0.187313		torY	0.148588
ybiC	0.0344215		acpP	-0.281613		rseA	0.151971		carA	0.0730403		yjjZ	0.113347		ybiV	0.1006		ivbL	0.0221435		gnd	0.129028		oppB	0.187181		eutL	0.148564
tehA	0.0342315		psd	-0.282314		rbsA	0.151283		folA	0.0729852		ynbA	0.113318		fdnG	0.100507		yfeA	0.0221341		clsC	0.129013		gspF	0.187073		tsaD	0.147912
flhC	0.0340449		frdD	-0.28412		elaA	0.15104		ymgD	0.0729116		zntR	0.113144		yebY	0.100333		evgS	0.0221266		bluR	0.128884		btuE	0.186752		yadC	0.14784
iclR	0.0340384		ubiH	-0.285963		ypjB	0.151024		ydhK	0.0729107		marC	0.112991		fhuD	0.0999276		waaJ	0.0221151		wbbK	0.128811		fepC	0.186653		malP	0.147839
yegU	0.0340096		clcA	-0.286836		xdhC	0.150677		rutR	0.0728518		bglJ	0.112513		yejG	0.0998183		yahL	0.0220492		fic	0.128787		yhiI	0.186424		ispB	0.14783
folE	0.0340052		tdcD	-0.287304		ybjN	0.150118		ybfE	0.0728138		yhjY	0.112427		bioA	0.0995786		ydaM	0.0219347		acnA	0.128652		modB	0.186258		cstA	0.147669
mtr	0.0339148		yibH	-0.28743		pptA	0.14998		waaY	0.0727133		ybbN	0.112391		flgB	0.09935		ompL	0.0219314		yccB	0.128647		yibJ	0.186059		ompR	0.147581
xanQ	0.0338501		srlD	-0.288627		yneJ	0.149548		fecC	0.0726841		dtpB	0.112175		tdcF	0.0990868		yeaD	0.0219279		pspF	0.128594		yjfM	0.185934		setB	0.147374
yhaL	0.0338413		nrdE	-0.289073		nrdA	0.149181		tesA	0.0726588		hybE	0.112099		paaF	0.0990688		yaaJ	0.0218756		yiaD	0.12852		narL	0.185701		torD	0.147374
narG	0.0336599		ldcC	-0.296282		hisQ	0.149096		mog	0.0722544		ydeP	0.112046		ybjG	0.09881		ydcT	0.0218499		cysP	0.128054		fimB	0.185442		fliG	0.147305
yjhR	0.0334892		lysP	-0.298518		rfbX	0.149028		cyoD	0.0721775		cvpA	0.111953		thiP	0.098751		ybgC	0.0218213		soxR	0.127985		glgC	0.185429		manX	0.14676
yhiJ	0.0334033		grxC	-0.300435		rpoH	0.148924		gudD	0.0721442		fecR	0.111827		pmbA	0.0986591		ilvE	0.0217285		ybfG	0.127982		fepA	0.185208		hscB	0.146579
rsmH	0.0332312		mltB	-0.300468		yidH	0.148915		pykA	0.0721159		potH	0.111774		murR	0.0984374		ttcA	0.0215742		gspL	0.127762		basR	0.185198		yadS	0.146457
ubiF	0.033104		gsiB	-0.301608		wcaB	0.148911		proY	0.0719641		ymgF	0.111773		cheA	0.0976341		ariR	0.0215396		ycdY	0.127651		yfdC	0.185125		murQ	0.146406
ptrA	0.0329472		ybjN	-0.302023		yhhL	0.1488		yeiR	0.071959		mprA	0.111548		glcD	0.0968247		ydhI	0.0215233		grxC	0.127468		atoS	0.185011		ompT	0.146146
yrhD	0.0328467		rhtC	-0.303021		pepE	0.148602		kbaY	0.0718976		fucO	0.111285		marA	0.0968105		ydfR	0.0215205		ynfC	0.127428		yfiL	0.184775		yaaY	0.146134
thiM	0.0328361		tmcA	-0.304827		mutH	0.14846		ybhF	0.0717699		lspA	0.111181		cysJ	0.0966543		hofO	0.0214402		yfbM	0.127386		yggD	0.184608		rihA	0.146066
etk	0.0326463		sthA	-0.308806		cof	0.148397		ecpE	0.0716978		nrfE	0.110712		prpD	0.0963664		ampG	0.021423		qseC	0.12728		ycaO	0.1844		ypeB	0.145698
amiA	0.0325429		arnT	-0.309131		yjgR	0.148025		rutE	0.0716766		yeaM	0.110694		b0309	0.0962231		ppiC	0.0213992		tatD	0.127152		yaiS	0.184389		yoaB	0.14562
lptG	0.0325066		csrA	-0.315637		ymfK	0.147764		tsr	0.0716499		cspE	0.110569		prc	0.0954062		tusC	0.0213012		gspD	0.127052		ulaA	0.183399		yibL	0.145612
insE-4	0.0324239		rhaT	-0.317653		frmA	0.14772		argH	0.0716254		potA	0.110397		ssuB	0.0953534		hslU	0.0212153		yhjE	0.12697		ybdL	0.182583		appC	0.145396
dmlA	0.0323646		artM	-0.318266		def	0.147453		malE	0.0713501		ypeC	0.11021		sufC	0.0952449		rttR	0.0211232		yhfA	0.126914		fadI	0.182262		eutS	0.145355
ushA	0.0321828		mmuM	-0.322288		phoR	0.14689		ydcL	0.0712649		mqo	0.110118		ilvN	0.095115		yedZ	0.0209287		cueR	0.12675		yccJ	0.182169		omrB	0.145216
uhpA	0.0320829		fliN	-0.323351		dgoK	0.146855		ygfT	0.071149		mutH	0.110042		flhA	0.0951082		thrA	0.0207467		uspA	0.126586		yeaK	0.181988		sucD	0.145209
treR	0.0320623		glmU	-0.323631		allS	0.146468		gutQ	0.071066		yeaV	0.109993		putA	0.0948377		rho	0.0206336		ymjB	0.126345		pinE	0.181966		yidE	0.145109
fliY	0.0320589		garP	-0.326929		ydhV	0.146315		uspC	0.0710534		rarA	0.109889		pstC	0.0947359		ygdG	0.0205621		gadE	0.126272		cysD	0.181907		pagB	0.145025
paoD	0.0319485		lrp	-0.327965		deoD	0.146293		citT	0.0708604		tynA	0.109721		nrfA	0.0947027		kdpE	0.020364		mtr	0.126254		ribC	0.181129		ycaD	0.144503
nuoK	0.0318548		mntH	-0.329874		dppA	0.146268		ytfQ	0.0706808		ydiZ	0.109392		yjiL	0.0946825		ybgI	0.0203633		hyfC	0.126128		znuB	0.181062		adhE	0.144173
chaC	0.0315862		yecC	-0.331219		rlmI	0.146222		parE	0.0706164		degS	0.109097		yeaK	0.0943966		katE	0.0203401		ytfL	0.126054		kup	0.181039		yfbV	0.144138
icd	0.0313903		pgsA	-0.336051		puuB	0.146168		rnlA	0.0706127		ecnB	0.108846		psrO	0.0943923		yfbP	0.0203297		ahpF	0.125881		gcl	0.181037		fecA	0.144013
rayT	0.0312961		exuR	-0.341318		entH	0.145662		yjbH	0.0705005		cptA	0.108538		wcaC	0.0942871		ypjD	0.0202727		rffG	0.125702		napD	0.180967		paoD	0.143736
cbeA	0.0311786		torZ	-0.342703		yrdA	0.145656		emrK	0.0704998		orn	0.108215		ompN	0.0941012		btuC	0.0202498		garL	0.125619		ykfB	0.180771		dmlR	0.143576
ybaB	0.031146		yhfT	-0.345665		micC	0.14529		djlC	0.0704914		gmm	0.108199		pflC	0.0940045		alsC	0.0201932		ftsK	0.125546		rhaB	0.180744		tsgA	0.14335
mhpA	0.0311208		gpmA	-0.346123		umpH	0.14528		uhpC	0.0703885		yfdE	0.108061		hofQ	0.0935482		queE	0.0201803		fliS	0.125502		yejB	0.180268		mukF	0.143334
yibN	0.0310883		ygbN	-0.346863		modE	0.14525		priA	0.0702182		cobU	0.10801		glnB	0.0932876		ydhL	0.020079		ulaF	0.125331		nadB	0.179946		argT	0.142899
psrO	0.0310282		rpoN	-0.347833		ugpB	0.145233		mtlA	0.0701413		ydiB	0.107919		kgtP	0.0924969		yigM	0.0200496		osmB	0.125317		yidD	0.179861		yibG	0.142195
bioA	0.0310256		tolC	-0.350104		secY	0.145116		zraS	0.0701278		yddE	0.107849		lpxH	0.0922189		pal	0.0200477		yiaY	0.125291		elaA	0.179851		nemA	0.142095
pdxH	0.0309838		amyA	-0.353543		tdcG	0.144744		glmY	0.0701154		mltA	0.107781		livM	0.0912564		lolA	0.020013		fepG	0.12525		phnP	0.179414		osmC	0.142016
ilvN	0.0308001		btuB	-0.354577		pyrF	0.144096		ppsR	0.0701023		fhuD	0.107773		dcuS	0.0911731		yggL	0.0199535		hyaD	0.125226		cysK	0.179357		rseA	0.141961
betB	0.0307521		ybiO	-0.356596		yeiG	0.143873		murQ	0.0700153		ybjM	0.107562		yceB	0.0907883		deoD	0.0199083		glgX	0.124488		pyrE	0.17935		ptsI	0.141801
yfaP	0.0306274		narZ	-0.358112		intA	0.143599		rcsF	0.0699613		nagC	0.107484		napA	0.0906826		yqcE	0.0198714		sdiA	0.124422		pal	0.178902		ylbH	0.141633
hyfA	0.0304959		sapB	-0.360767		emrK	0.143424		yhhY	0.0697953		purT	0.107469		aroC	0.0902649		gntR	0.0197779		kbaZ	0.124361		yaiY	0.178193		yjcO	0.141465
metJ	0.0304716		mngA	-0.362572		sroG	0.143374		hyfH	0.0696205		yihL	0.107428		lacZ	0.089631		ybjD	0.0197118		ypdF	0.124261		ygbK	0.177535		gsiD	0.141292
fcl	0.0303484		flhD	-0.366939		ptsH	0.143124		pldA	0.0695498		yacL	0.106719		ldrC	0.089525		mreB	0.0197103		yfdN	0.123921		ygiH	0.177441		proW	0.141166
gspC	0.0303048		mscL	-0.368944		yihW	0.142932		yjhB	0.0694969		yqcE	0.106662		ccmE	0.089447		hemF	0.0196925		treF	0.123735		cspC	0.177334		mhpD	0.140991
mtgA	0.0301793		ulaC	-0.370256		eutP	0.142732		ytfH	0.0694086		aer	0.106609		setB	0.0893993		yedD	0.0196759		yfcZ	0.123661		metY	0.176891		bisC	0.140862
tdcB	0.0301754		ybdG	-0.374724		glvC	0.142688		yggD	0.0692056		pagB	0.106487		gatA	0.089344		arfA	0.0196566		yifO	0.123461		slyB	0.176418		sibB	0.140437
yggD	0.0298866		pppA	-0.380621		gspO	0.142619		pabB	0.069095		ydcV	0.106351		yaaJ	0.0890991		mglC	0.0195333		fliL	0.122768		sapB	0.175774		yccM	0.140109
dtpB	0.029566		yebZ	-0.381683		cyoE	0.142488		yfdE	0.0690367		malS	0.106252		mdh	0.0889806		sdhC	0.0195012		caiA	0.122237		yoaC	0.17539		trpB	0.140007
mdtD	0.0294622		mdoC	-0.383855		bglJ	0.142453		patA	0.0688644		bamB	0.105882		ddpC	0.0889499		yfbS	0.0194499		ydfG	0.122202		ydiF	0.175235		glpF	0.139902
ompC	0.0290764		glvB	-0.384218		b0725	0.142082		nagK	0.0686675		htrE	0.105024		sufE	0.0889303		ynjA	0.0194444		ycjP	0.122151		yeeL_1	0.175069		hisD	0.139867
yeaD	0.0290146		recX	-0.389775		insO-1	0.142006		gluQ	0.0686123		ybgL	0.10481		dgoA	0.0885168		yghF	0.0194099		ccmH	0.122129		flgM	0.175049		yigL	0.139594
[truncated: 2,452 more rows]

## Sheet: Fig 3AB data
gene_name	control	T2	T3	T4	T5	T6	N4	lambda	186	CEV1	CEV2	LZ4
csrA	-1.19	0.65	-0.32	0.75	0.49	2.52	1.16	2.31	1.17	1.97	0.37	0.62
fabA	0.57	0.14	4.6	-0.09	0.17	0.27	0.58	0.03	-0.83	0.39	0.77	-0.05
fabB	-2.4	0.64	4.94	0.63	-0.02	1.22	0.4	-0.1	-0.92	0.89	0.8	0
ftsH	-0.18	0.1	0.07	0.28	0.83	0.14	3.24	1.55	0.76	0.01	-0.07	0.29
glmS	0.17	-0.05	0.26	0.12	-0.16	0.37	2.94	-0.04	0.09	-0.07	-0.16	-0.17
glmU	0.19	-0.05	-0.32	-0.02	-0.16	0.07	3.18	-0.06	-0.04	-0.12	0.1	0.14
IgaA	-0.44	2.74	9.58	7.79	4.72	5.93	3.65	3.46	1.04	5.95	5.45	3.52
kdsC	-0.97	1	3.18	2.06	0.71	1.22	0.13	0.87	0.16	5.32	2.39	0.67
lptA	-1.3	1.08	3.55	2.09	0.78	1.79	0.26	0.92	0.05	5.35	2.23	1.45
lptB	-0.8	0.51	2.92	1.02	0.14	0.44	0.04	0.45	-0.08	3.94	1.96	0.3
lptC	-0.88	1.21	4.73	3.03	0.86	1.79	0.22	1.23	0.29	5.66	2.53	2
lpxA	-1.53	0.45	2.07	0.91	0.48	0.3	-0.45	0.32	-0.77	2.5	1.61	0.11
lpxC	-1.31	0.74	3.52	2.02	1.01	0.59	-0.55	0.22	0.02	4.5	1.99	0.45
nusB	-0.8	0.18	0	-0.07	0.55	0.06	0.39	3.64	0.21	0	0.52	0
nusG	-0.66	0.31	2.28	0.19	0.67	0.59	0.65	3.55	2.1	-0.17	2.53	0
secE	0.48	0.16	3.73	-0.04	0.93	0.14	0.98	3.73	2.53	0.34	2.96	0.38
tsf	-0.16	0.809	2.82	1.5	1.13	0.28	2.17	0.9	2.76	0.54	-0.04	0
yejM	-0.56	1.25	6.01	4.08	1.12	2.65	0.53	1.22	-0.19	5.5	2.84	1.97
yidC	-1.71	-0.17	0.9	0.32	-0.49	0.06	1.67	3.67	0.31	-0.08	0.79	0.26
gene_name	control	T2	T3	T4	T5	T6	N4	lambda	186	CEV1	CEV2	LZ4
dgcJ	0.331992	0.121379	0	0.86251	-0.0681106	-0.439562	4.23354	-0.0181079	0.446533	-0.017268	0.245547	0
dsrB	0.133972	0.0848503	1.06965	0.244197	0.270145	-0.373024	3.87559	0.0549401	0.368912	0.431798	-0.161246	0
fadL	-0.0583544	2.508	0.579106	0.270433	-0.0272905	0.359074	-0.159252	-0.020266	-0.421855	0.631958	0.19392	0.418041
fhuA	0.0433753	-0.0253886	-0.205385	0.18739	4.22996	0.0461476	0.631053	-0.0319178	0.0151508	0.0784451	4.643	0.177518
lamB	0.0774474	-0.0331034	0.699992	-0.026857	0.0320357	-0.0870537	-0.195107	5.0555	0.54112	0.128667	0.287713	0.68024
malK	0.226735	-0.174025	0.25444	-0.132492	-0.25412	-0.27363	0.23801	3.39759	0.572822	0.116414	-0.012466	0.508737
malT	0.121378	-0.00196869	0.331737	0.587822	0.0647424	0.138277	0.365341	5.01909	0.166708	0.305595	0.21969	0.686128
mdtN	0.290857	-0.0506494	0	-0.172647	0.732581	0.671279	0	0.172078	0.689683	6.11467	-0.0719782	4.45847
nfrA	0.102191	0.0994525	1.99017	0.385868	-0.119462	0.456649	3.50619	0.0510854	-0.287349	-0.273842	-0.121164	0
nfrB	0.00810486	-0.04835	-0.114317	0.00170919	-0.12107	-0.197185	3.66778	-0.0830784	0.130161	0.639278	0.975364	0
ompC	0.569274	0.0290764	0.961029	7.78913	-0.0230063	0.215862	0.211365	-0.155942	-0.00202266	0.356559	0.238985	0.269251
ompF	0.0320589	0.152432	0.587598	0.326809	0.269286	0.167166	0.458003	0.00103933	0.254791	12.2178	-0.010128	5.5724
serX	0.328743	0.367761	0	0.342237	0.425741	0.0991736	0	0.255671	3.08853	0.792246	0.56662	0
tag	0.157765	0.371503	0	4.87358	-0.218616	-0.10163	0.146924	-0.133931	0.149572	-0.234819	-0.614011	-0.0379274
tsx	-0.099411	0.0765955	-0.0712788	-0.396726	-0.0556618	3.1722	0.0169515	-0.14589	0.60978	-0.0302733	-0.17776	4.69219
waaG	-0.28323	-0.0445599	0	0.00608507	-0.192328	0.335613	-0.228683	-0.00129736	2.87021	1.35463	-0.16989	0.333136
waaP	-0.537015	-0.0970474	0	0.171335	-0.596958	0.283607	-0.210624	-0.0927533	2.8092	1.2611	-0.208583	0.283887
waaQ	-0.12388	-0.00787492	-0.0900882	0.0149966	-0.368178	0.117583	-0.0656559	-0.0247325	2.76644	0.215326	-0.0163618	0.211035
ydfW	-0.098194	0.625584	0	0	-0.043177	1.18944	4.34276	0.0334413	0	1.51735	0	0
yecT	-0.268976	0.101105	0	0.508165	0.189946	-0.0153168	3.94411	-0.0400465	-0.515386	0.0725906	0.027082	0
yedY	-0.442966	1.27564	9.45711	2.93466	0.266445	2.01443	2.69275	0.299427	-0.5408	1.39916	0.00175728	1.96891
yejL	-1.65947	2.31887	6.27322	4.73022	1.00706	2.71245	0	1.12856	-0.16209	6.40941	2.73163	2.46001

## Sheet: Fig 3C data
	Fig 3C underlying data
	No phage	T2	T3	T4	T5	T6	N4	Lambda	I86	CEV1	CEV2	LZ4
LogFC	-0.353215	2.07698	10.0205	6.61525	4.76815	6.94822	3.90265	4.05776	1.49401	6.55218	5.93015	4.49997
LogFC	-0.404465	4.34521	9.88906	6.19265	4.73065	6.74917	3.6471	3.49967	1.03999	6.52306	5.5199	2.54967
LogFC	-0.481403	3.03043	9.27849	5.20135	4.70072	5.10893	3.63636	3.4151	0.784785	5.38274	5.38967
LogFC	-0.723996	2.4555	9.1479	5.13942	4.38898	3.41131		3.18215		4.1567	5.27636
