# Supplementary material for: High-throughput mapping of the phage resistance landscape in E. coli
Source: PLoS Biol. 2020 Oct 13;18(10):e3000877. doi: 10.1371/journal.pbio.3000877 (PMC7553319; doi:10.1371/journal.pbio.3000877)
Supplement: S5 Table — Dub-seq, dual-barcoded shotgun expression library sequencing. (XLSX) [file pbio.3000877.s013.xlsx]

## Sheet: info
S5 Table
This file contains Dub-seq K-12 data for diverse phages
Planktonic assay1	sheet provide fitness score data for each gene at different condition. Column headers provide information on phages and its multiplicity of infection value.
Planktonic assay2	sheet provide fitness score data for each gene at different condition. Column headers provide information on phages and its multiplicity of infection value.
Solid plate assay	sheet provide fitness score data for each gene at different condition. Column headers provide information on phages and its multiplicity of infection value.
High_fitness_scores	sheet provides filtered data that pass our stringent filters (Methods)
Fig 4A	dataset used in generating Fig 4 heatmap in the main text
new gene names	yrfF (igaA) pdeN(rtn); gmr (pdeR); yjcC (pdeC); dosP (pdeO); pdeL (yahA); pdeB (ylaB); pdeI (yliE); dgcJ (yeaJ); yhbJ(rapZ)

## Sheet: Planktonic_assays1
	z	IT042_No phage	IT047_T2_Phage-SM-1_MOI_16.66	IT048_T2_Phage-SM-2_MOI_1.66	IT049_T2_Phage-SM-3_MOI_0.16	IT050_T2_Phage-SM-4_MOI_0.016	IT051_T3_Phage-SM-1_MOI_4.16	IT052_T3_Phage-SM-2_MOI_0.41	IT053_T3_Phage-SM-3_MOI_0.0416	IT054_T3_Phage-SM-4_MOI_0.004166666667	IT055_T4_Phage-SM-1_MOI_17.70833333	IT056_T4_Phage-SM-2_MOI_1.770833333	IT057_T4_Phage-SM-3_MOI_0.1770833333	IT058_T4_Phage-SM-4_MOI_0.01770833333	IT059_T5_Phage-SM-1_MOI_1.875	IT060_T5_Phage-SM-2_MOI_0.1875	IT061_T5_Phage-SM-3_MOI_0.01875	IT062_T5_Phage-SM-4_MOI_0.001875	IT063_T6_Phage-SM-1_MOI_15.625	IT064_T6_Phage-SM-2_MOI_1.5625	IT065_T6_Phage-SM-3_MOI_0.15625	IT066_T6_Phage-SM-4_MOI_0.015625	IT073_N4_Phage-SM-1_MOI_0.1041666667	IT074_N4_Phage-SM-2_MOI_0.01041666667	IT075_N4_Phage-SM-3_MOI_0.001041666667	IT076_N4_Phage-SM-4_MOI_0.0001041666667	IT077_CI1857_Phage-SM-1_MOI_41.66666667	IT078_CI1857_Phage-SM-2_MOI_4.166666667	IT079_CI1857_Phage-SM-3_MOI_0.4166666667	IT080_CI1857_Phage-SM-4_MOI_0.04166666667	IT081_LZ4_Phage-SM-1_MOI_5.9375	IT082_LZ4_Phage-SM-2_MOI_0.59375	IT083_LZ4_Phage-SM-3_MOI_0.059375	IT084_LZ4_Phage-SM-4_MOI_0.0059375	IT085_CEV1_Phage-SM-1_MOI_1.875	IT086_CEV1_Phage-SM-2_MOI_0.1875	IT087_CEV1_Phage-SM-3_MOI_0.01875	IT088_CEV1_Phage-SM-4_MOI_0.001875	IT089_I86_Phage-SM-1_MOI_26.04166667	IT090_I86_Phage-SM-2_MOI_2.604166667	IT091_I86_Phage-SM-3_MOI_0.2604166667	IT092_I86_Phage-SM-4_MOI_0.02604166667	IT093_CEV2_Phage-SM-1_MOI_16.66666667	IT094_CEV2_Phage-SM-2_MOI_1.666666667	IT095_CEV2_Phage-SM-3_MOI_0.1666666667	IT096_CEV2_Phage-SM-4_MOI_0.01666666667
0	thrL	0.0728956	-0.487507	0.244006	-0.744584	0.870065	-0.438597	-0.448247	-0.467744	-0.482541	-0.477591	-0.558892	-0.60672	-0.171178	-0.448247	-0.633993	0.318426	-0.497491	-0.429011	-0.443414	-0.467744	-0.502509	-0.123022	0.0379546	-0.766549	-0.873	-0.564128	-0.772598	-0.608148	0.685731	-0.453097	-0.579953	-0.569384	-0.63951	-0.512598	-0.538133	-0.585267	-0.309435	-0.522758	-0.538133	-0.543295	-0.609424	-0.443414	-0.517669	-0.487507	-0.71322
1	thrA	0	0	0	0	0	0	0	0	0	0	0	0	0	0	0	0	0	0	0	0	0	0	0	0	0	0	0	0	0	0	0	0	0	0	0	0	0	0	0	0	0	0	0	0	0
2	thrB	0.051851	0.286689	0.398367	0.279551	0.308003	0.312628	0.34837	0.3838	0.350783	0.332637	0.257689	0.188156	0.152169	0.34837	0.20881	0.191887	0.116112	0.364969	0.457047	0.331547	0.301548	0.276611	0.475742	0.289841	0.107025	0.251091	0.740951	0.269821	0	0.344185	0.310795	0.333487	0.372059	0.354683	0.253303	0.515341	0.0555567	0.414502	0.330659	0.347119	0.214986	0.35254	0.29326	0.394551	0.381879
3	thrC	-0.0143534	1.04165	0.931484	0.60219	0.757423	1.09508	0.953503	1.00957	1.17075	0.853031	0.900783	0.993479	0.787617	0.953503	0.73322	0.567302	0.144738	0.954001	1.06676	0.952998	0.952098	1.12683	0.672324	0.981904	0.991697	0.922276	0.881798	1.09441	0.495149	0.953377	1.0269	0.818057	0.85374	0.908692	0.933232	0.919771	0.748072	0.995133	0.928724	0.711082	0.890109	0.953628	0.90185	0.919888	0.62026
4	yaaX	0.00946338	0.0484124	0.0343	0.177761	0.0169968	0.102355	0.0677592	0.0711505	0.168808	0.173427	0.0334544	0	0.212424	0.0677592	0.185029	0	0.05135	0.0852249	0.114333	0.0500575	0.018492	0	0.0945604	0.0962276	0	0	0	0	0	0.0633561	0.0545277	0.0948769	0.0551026	0.162735	0.130713	0.0664354	0	0	0.112094	0.256868	0	0.0721475	0.0708828	0.0369072	0.144877
5	yaaA	0.0605275	0	0.0518481	0	0.23882	0	0	0	0	0	0	0	0	0	0	-0.157562	-0.135691	0	0	0	0	0	0	0	0	0	0	0	0.144716	0	0	0	0	0	0.0277207	0.0516358	0	0	0	0.278311	0	0	0	0	0
6	yaaJ	0.161307	-0.188727	-0.249695	-0.195804	-0.0958787	-0.139818	-0.149468	-0.168964	-0.183761	-0.178812	-0.260112	-0.30794	-0.372398	-0.149468	-0.0852133	-0.135885	-0.768548	-0.130232	-0.144635	-0.168964	-0.203729	-0.324242	-0.455747	-0.217769	1.4201	-0.265348	0.891039	-0.60185	-1.35045	-0.154317	-0.0311734	-0.270604	-0.0907303	0	0.367279	-0.0364872	-0.0106553	2.52408	-0.239353	0.848413	-0.310645	-0.144635	-0.218889	-0.188727	-0.16444
7	talB	-0.19639	1.01908	1.00952	0.815932	0.941839	1.06562	1.05643	1.12167	1.43687	1.13424	0.935357	1.01137	1.0029	1.05643	0.928146	0.815586	0.415338	1.07474	1.06103	1.03788	1.0048	1.04872	0.861911	0.739591	0.678694	0.941762	0.596539	0.530829	0.230619	1.05182	1.02803	0.936761	0.958225	1.03925	0.966497	0.974511	0.814069	0.985533	0.966497	0.965991	1.06166	1.14041	1.03626	1.01908	1.05048
8	mog	0	0	0	0	0	0	0	0	0	0	0	0	0	0	0	0	0	0	0	0	0	0	0	0	0	0	0	0	0	0	0	0	0	0	0	0	0	0	0	0	0	0	0	0	0
9	satP	0	0	0	0	0	0	0	0	0.0741543	0	0	0	0	0	0	0	0	0	0	0	0	0	0	0	0	0	0.511737	0.0697904	0	0	0	0	0	0	0	0	0	0	0	0	0	0	0	0	0
10	yaaW	-0.217624	0	0	0	0	0	0	0	0	0	0	0	0	0	0	0	0	0	0	0	0	0	0	0	0	0	0	0	0	0	0	0	0	0	0	0	0	0	0	0	0	0	0	0	0
11	yaaI	-0.00582908	1.37009	1.39325	1.34536	1.07314	1.41512	1.40624	1.38131	1.29081	1.37041	1.60443	1.25152	1.18777	1.40624	1.31452	0.774687	0.973327	1.42395	1.41069	1.38829	1.35628	1.23211	1.28284	1.3785	1.51296	1.38325	0.911135	1.04862	0.920313	1.40177	1.44357	1.37841	1.22316	1.50999	1.40718	1.35938	1.14858	1.33764	1.40718	1.31873	1.24463	1.48741	1.47058	1.37009	1.39176
12	dnaK	-1.85899	3.17991	3.11894	2.92283	3.87652	3.22882	3.21917	3.19967	3.18488	3.18982	3.10852	3.0607	2.99624	3.21917	3.03342	2.40088	2.16993	3.2384	3.224	3.19967	3.16491	3.04439	2.91289	2.90087	2.79442	3.10329	2.89482	2.26679	1.76818	3.21432	3.08746	3.09803	3.02791	3.15482	3.12928	3.08215	2.85798	3.14466	3.12928	3.12412	3.05799	3.224	3.14975	3.17991	2.9542
13	dnaJ	-0.0822397	0	0	0	0	0	0	0	0	0	0	0	0	0	0	0	0	0	0	0	0	0	-0.178041	-0.350326	0	0	0	-0.651284	-0.406803	0	0	0	0	0	0	0	0	-0.540921	0	0	0	0	0	0	0
14	insL1	0	-1.66878	-1.72975	-1.92586	-1.0856	-1.78654	-1.79619	-1.81569	-1.83048	-1.82553	-1.74017	-1.9382	-1.39051	-1.79619	-1.55111	-1.51698	-1.91461	-1.77695	-1.79136	-1.64902	-1.51712	-1.4543	-0.891973	-0.348798	-1.18762	-1.91207	-1.19995	-0.358781	0	-1.63437	-1.59456	-1.23586	-1.72713	-1.86054	-1.55274	-1.66905	-1.06793	0.162848	-1.88607	-1.89124	-1.42905	-1.5856	-1.53228	-1.5856	-0.988109
15	mokC	0	0	0	0	0	0	0	0	0	0	0	0	0	0	0	0	0	0	0	0	0	0	0	0	0	0	0	0	0	0	0	0	0	0	0	0	0	0.299168	0	0	0	0	0	0	0
16	hokC	0	0	0	0	0	0	0	0	0	0	0	0	0	0	0	0	0	0	0	0	0	0	0	0	0	0	0	0	0	0	0	0	0	0	0	0	0	0	0	0	0	0	0	0	0
17	sokC	-0.0851838	0	0	0	-0.553238	0	0	0	0	0	0	-0.0164631	-0.197781	0	0	0	0	0	0	0	0	-0.0166656	0	-0.302782	-0.366653	0	0	0	-0.973406	0	0	-0.294476	-0.093657	0	0	0	-0.325285	0	0	0	0	-0.205754	0	-0.249846	-0.475559
18	nhaA	-0.318306	-1.12352	-0.794241	-1.0595	0	-1.08683	-0.719071	-1.10869	-1.11979	-1.11608	-0.873803	-0.705192	-0.471473	-0.719071	-1.28224	-0.0827873	-0.735712	-1.07726	-1.09045	-0.514332	-0.759767	-0.737391	-1.40277	-0.452213	-0.537374	-0.170832	-1.33733	0	-0.254045	-1.09771	-0.894865	-0.0744943	-0.616385	-1.16084	-1.16148	-1.23351	-0.492979	-0.83767	-0.786485	-0.790356	-0.0733745	3.00135	-0.771137	0.0173918	4.26981
19	nhaR	0	0	0	0	0	0	0	0	0	0	0	-0.0478928	-0.34607	0	0	0	-0.908144	0	0	0	0	0	0	0	0	-0.163152	0	-0.758267	0	0	0	0	0	0	0	0	0	0	0	0	-0.38296	-0.125739	0	-0.333984	-0.40134
20	insB1	-0.199743	-0.0367111	-0.207437	0	-0.186287	-2.89087e-05	-0.132267	-0.0218887	-0.0329864	-0.0292745	0	0	0	-0.132267	0	-0.495983	0	0	-0.00364167	-0.220009	-0.172963	0	0	2.00201	0	-0.376509	-0.25053	0	0	-0.0109036	0	-0.134928	-0.335492	0	-0.0746807	0	-0.568818	1.21344	-0.199681	-0.203552	0.323915	-0.255796	-0.184333	-0.299888	0
21	insA	0	0	0	0	0	0	0	0	0	0	0	0	0	0	0	0	0	0	0	0	0	0	0	0	0	0	0	0	0	0	0	0	0	0	0	0	0	0	0	0	0	0	0	0	0
22	rpsT	-0.0777185	-0.652834	-0.543076	-0.613289	-0.473316	-0.640606	-0.518019	-0.647893	-0.651592	-0.650355	-0.76093	-0.760865	-0.527146	-0.518019	-0.836031	-0.639258	-0.124718	-0.631049	-0.641811	-0.449773	-0.531584	1.40842	1.96395	0.40925	2.86688	-0.226505	-0.390773	0	1.17689	-0.644231	-0.448658	-0.108173	0	-0.714636	-0.332157	-0.787305	-0.109322	-0.724796	-0.54049	-0.541781	0	0	-0.535374	-0.0556728	0
23	yaaY	0.561574	0.887334	0.887334	0.887334	0.887334	0.887334	0.887334	0.887334	0.887334	0.887334	0.887334	0.887334	0.887334	0.887334	0.887334	0.887334	1.88733	0.887334	0.887334	0.887334	0.887334	0.887334	1.41565	0.887334	0.887334	0.887334	0.887334	0.887334	1.22067	0.887334	0.887334	0.887334	0.887334	1.22067	0.887334	0.887334	0.887334	0.887334	0.887334	0.887334	0.887334	0.887334	0.887334	0.887334	0.887334
24	ribF	0.383583	2.03016	1.96919	1.77309	1.72677	2.07907	2.06942	2.04993	2.03513	2.04008	1.95878	1.91095	1.84649	2.06942	1.88368	1.25113	1.02018	2.08866	2.07425	2.04993	2.01516	1.89465	1.76314	1.75112	1.64467	1.95354	1.74507	1.11704	0.618437	2.06457	1.93772	1.94828	1.87816	2.00507	1.97954	1.9324	1.70823	1.99491	1.97954	1.97437	1.90824	2.07425	2	2.03016	1.80445
25	ileS	-0.487804	0.796205	0.735237	0.539128	0.492813	0.845114	0.835464	0.815968	0.801171	0.80612	0.72482	0.676992	0.612534	0.835464	0.649719	0.0171751	-0.213779	0.8547	0.840297	0.815968	0.781203	0.66069	0.529185	0.517163	1.41071	0.719584	0.511113	0.883082	0.969443	0.830615	0.703759	0.714328	0.644202	0.771114	1.74558	0.698445	0.474277	0.760954	0.745579	0.740417	0.674287	0.840297	0.766043	0.796205	0.570492
26	lspA	0.0259622	0.278379	0.196956	0	0	0.0599961	0.0234427	0.052813	0.0174973	0.0308742	0	0.0890861	0	0	0	0	0.140517	0.0635829	0.0582479	0	0.108426	0	0.170116	0.134559	0.0388918	0.0864728	0	0.156553	0.420613	0.0638914	0.0307103	0	0.0608257	0.0777952	0	0.0275185	0	0.0692189	0	0.312354	0.152375	0.0526888	0.930948	0	0
27	fkpB	0.165979	0	0.00624827	0	0.185647	0.0399804	0.242627	0.119996	0.0491726	0	0.169855	0	0.291628	0.642554	0.116274	0.811173	0	0.045033	0	0.102898	0.0581335	0	0.195691	0.392051	0	0.23304	0.347946	0	0	0.120765	0.0361658	0.121068	0	0	0.0617262	0.0348593	-0.0806826	0	0	0.395603	0	0.0442767	0	0.0916618	0.171168
28	ispH	0.112734	0.0518413	0.0889198	0	0	0.141249	0.0642312	0.0577105	0.0897985	0.18955	0.0627407	0	0.420347	0.715268	0	0.290578	0	0.138783	0.216066	0.143888	0.023583	0.123905	0	0	-0.167139	0	0	-0.201565	0	0.0674251	0.134456	0.183799	0.0429289	0.0871966	0.0822696	0.132924	0.695547	0.0772452	0.193747	0	0.157839	0.12923	0	0.12497	0.0207066
29	rihC	0	-0.372774	-0.234577	-0.342633	-0.36589	-0.323864	-0.277959	-0.297455	-0.367808	-0.251747	-0.277492	-0.325321	0	0.10095	-0.463705	0	-0.6293	-0.314278	-0.328681	-0.297455	-0.332221	-0.253569	-0.440629	-0.0189098	-0.104843	0	-0.481758	-0.285905	0	-0.338364	-0.354109	-0.287984	-0.135888	-0.397865	-0.256733	-0.303867	0	-0.319971	-0.367845	-0.373006	-0.351082	-0.328681	-0.34738	-0.317218	-0.487376
30	dapB	0	0.247621	0.3759	0.317909	0.294596	0.229455	0.278903	0.269658	0.348953	0.280144	0.309949	0.253385	0.129004	0.189231	0.420097	0.0953986	0.158906	0.295139	0.276829	0.263222	0.465446	0.179147	0.171914	0.221679	0.147754	0.485723	0.0245636	0.279559	0.399696	0.279656	0.179864	0.252584	0.367715	0.235287	0.415113	0.162881	0.462382	0.254957	0.307051	0.0541034	0.210311	0.285307	0.188501	0.317832	0.14071
31	carA	-0.341445	0.0295089	0.0603784	0.0301772	0.0807951	0.221096	0.0505206	0.0364173	0	0.103786	0.0884328	0	0.165031	0.0944165	0	-0.257581	0	0.0602859	0.0565638	0.0401718	0.186189	0	0.0566515	0	0.00101814	0.758657	0	-0.0910215	0.0900878	0.045232	0.192001	0.194737	0	0.0116125	0	0	-0.147974	0.0733123	0	0.662181	0.144769	0.0516178	0.0338336	0.203966	0
32	carB	-0.661137	-1.51706	-1.57803	-0.774135	-1.82045	-1.46815	-1.4778	-1.4973	-1.51209	-1.50714	-0.588443	-0.0513091	-1.70073	-1.4778	-1.66354	-0.296088	1.1734	-1.45856	-1.47297	-1.4973	-1.53206	-1.65257	-0.199116	-1.7961	0.419376	-1.59368	-1.80215	0.154782	0.241142	-1.48265	-1.6095	-1.59894	-0.669062	-1.54215	-1.56768	-1.61482	-0.838987	-0.552309	-1.56768	-1.57285	-0.638976	-1.47297	0.0377421	-1.51706	-1.74277
33	caiF	-0.185088	0	-0.0269396	0	-0.196418	-0.0225729	0.0209089	-0.0220873	0	0	-0.0630633	-0.144852	-0.0858995	0	-0.14225	-0.108276	-0.0933738	-0.015012	-0.0598434	-0.0408667	-0.12932	0	-0.151639	-0.0135866	-0.125111	0.109223	0.395188	0	0.596217	-0.00584013	-0.0260836	-0.0177473	0	0	0	0	0.0105067	0	0.0144425	0.184119	-0.0330869	-0.0263722	0	-0.00950625	-0.224426
34	caiE	0	-0.170045	-0.223301	-0.279429	0	-0.165823	-0.11663	-0.118008	-0.221186	-0.216787	-0.124711	0	-0.300621	-0.073299	0	-0.351339	-0.319364	-0.162763	0	-0.197037	-0.0899827	0	-0.160563	0	-0.176279	0	0	0.040062	0.131808	-0.135241	-0.214863	-0.211489	-0.17553	0	0	0	0.392847	-0.308929	-0.0235676	-0.14556	-0.300065	-0.167361	-0.27093	-0.0891057	0
35	caiD	-0.437434	0	0	0	0	0	0	0	0	0	0	0	0	0	0	0	0	0	0	0	0	0.244242	0	1.0354	0	0.383349	0.00486456	0.458588	0.812832	0	0	0	0	0	0	-0.00715372	0	-0.0335624	0	0	0	0	0	0	0
36	caiC	-0.238219	-0.8429	-0.762187	-0.58427	-0.966131	-0.917224	-0.941995	-0.958385	-0.950148	-0.946299	-0.844615	-0.861518	-0.785069	-0.952827	-1.01412	-0.82471	-1.23076	-0.909349	-0.958838	-0.81128	-0.861753	0.97529	-0.520215	0	-1.2112	-0.260194	0.647964	-0.0513739	0.654673	-0.816461	-1.04588	-1.0372	-0.868532	-0.785502	-1.06104	-0.981383	-0.667098	0.501353	-0.930146	-0.904809	-0.620748	-0.921182	-0.847841	-0.861947	-0.958071
37	caiB	0.0227461	0.222519	0.104842	0.376062	0.485145	0.256756	0.250001	0.236353	0.225996	0.22946	0.17255	0.31407	0.0939494	0.250001	0.119979	0.233536	0.377569	0.263466	0.253384	0.236353	0.312018	0.127659	0	0.12719	0.152674	0.168884	1.12621	-0.282906	0	0.246606	0.157807	0.165205	0.116117	0.129955	0.464449	0.154087	0	1.97156	0.187081	0.884418	0.062177	0.353384	0.126406	0.222519	0.23952
38	caiA	-0.173352	0.284628	0.41695	0.18817	0.297253	0.318864	0.312109	0.298462	0.288104	0.291569	0.234658	0.126179	0.156058	0.312109	0.182087	0.215162	0.0303204	0.325575	0.315493	0.298462	0.374126	0.189767	1.3031	0.189298	0.214782	0.230993	0	0.181156	-0.557171	0.308715	0.219915	0.227314	0.178226	0.442064	0.130317	0.216196	0.058065	0	0.249189	0	0.374286	0.415493	0.438514	0.284628	0.0516288
39	caiT	-0.0743284	0.82781	0.566842	0.370733	0.724418	0.676719	0.667069	0.647573	0.632776	0.637725	0.556425	0.908597	0.444139	0.667069	0.681324	0.365773	0.934818	0.686305	0.671902	0.647573	0.612808	0.692295	0.677782	0.548767	0.876301	0.951188	0.542718	0.114687	1.11446	0.66222	0.735363	0.545933	0.675807	0.602719	0.977184	0.93005	0.305882	0.592559	0.577184	0.572022	0.505892	0.671902	0.797648	0.62781	0.402097
40	fixA	-0.222184	-0.0851512	0	0	0.00441171	-0.0362416	0.107731	-0.0653879	-0.0801849	0	-0.156536	-0.00436434	0	0	-0.073141	-0.218238	0	-0.0266555	-0.0410586	-0.0653879	-0.100153	0.255782	-0.252171	0	0	-0.161772	0.201861	-0.217538	0.46266	0	0	0	-0.137154	-0.110242	0	0	-0.00707927	0.376643	-0.135777	0.46026	0.275221	-0.0410586	-0.0153131	-0.0851512	-0.152368
41	fixB	0	0	0.130908	0.137763	0	0	0	0	0	0	0	0	0	0.0808243	0	0	0.495917	0	0.464362	0	0	0.206949	0	0	0.233442	0	0	0	0.218285	0.483134	0	0.0558688	0	0	0.0103721	0	0.112952	0.232822	0	0	0	0	0.0220521	0	0
42	fixC	-0.207627	1.00127	0.892377	0.770382	0.759116	1.0342	1.02412	1.01474	1.00465	1.00814	0.937803	0.974488	0.83812	0.995586	0.854004	0.649585	0.290255	1.03861	1.97559	0.993481	0.986428	0.773866	1.52785	0.82973	0.80054	0.789343	0.832443	0.384678	0.328058	1.84666	0.874325	0.878746	1.00375	1.07886	0.948751	1.11638	0.581301	0.828971	1.11235	0.894902	0.931992	1.02974	0.95304	0.956219	0.760655
43	fixX	-0.0862207	0	0	0	0.218224	0.031597	0.0246142	0.0100244	0	0.00269137	0	0	0.210453	0.0213222	0	0.0474796	0	0.0345781	0	0.0374186	0	0	0	0	0	0.247952	0.253872	0.452471	0.095726	0	0.0770149	0	0.121948	0	0	0.111483	0.105235	0	0.114616	0	0	0.0254476	0.00306928	0.0443675	0
44	yaaU	0	0.388442	0.344013	0.575454	0.0472186	0.358624	0.297095	0.391193	0.404248	0.402677	0.30922	0.464085	1.50543	0.386599	0.396194	0	0	0.392456	0.239213	0.439408	0.386792	0.223711	0.0962819	0.313373	0.191955	0.253734	0.0856209	0.352122	-0.0179567	0.222555	0.2713	0.571393	0.111928	0.361613	0.36584	0.175736	0.285594	0.450945	0.0836245	0.43394	0.58678	0.391986	0.462454	0.572698	0.537416
45	kefF	-0.128076	0.365428	0.32271	0.46999	0.324636	0.471137	0.604349	0.380287	0.340191	0.348607	0.398927	0.183694	0.814284	0.396476	0.305207	-0.0895052	0.434029	0.409518	0.440729	0.47233	0.339094	0.436276	0.290347	0.345611	0.181983	0.303197	0.43978	0.222307	0.18082	0.483962	0.298698	0.286226	0.40106	0.34994	0.312907	0.372311	0.135022	0.380349	0.680355	0.414124	0.30841	0.398648	0.381441	0.373378	0.228775
46	kefC	-0.0709005	0	0	0.00389071	0	0	0	0	0.0792071	0.128375	0.150658	0.527387	0	0	0	-0.0178441	0.134627	0	0	0	0	0	0	0	0	0	0	0	0.512393	0	0	0	0	0	0	0	0.326993	0	0	0	0	0	0	0	0
47	folA	0.0395053	0.612419	0.568242	0.553548	0.694421	0.632047	0.578181	0.626516	0.656887	0.571088	0.589498	0.495997	0.335607	0.640083	0.446579	0.24502	0.336143	0.654118	0.63454	0.679923	0.678831	0.524322	0.320121	0.633539	1.06279	0.795866	0.32791	0.48066	0.361294	0.690233	0.545866	0.686659	0.903196	0.593775	0.653289	0.524898	0.356366	0.578107	0.556067	0.626345	0.841855	0.643854	0.582342	0.61066	0.575779
48	apaH	0	0	0	0.195691	0	0	0	0	0	0	0	0	0	0	0	-0.0157479	0	0	0	0	0	0	0.371971	0	0	0	0	0	0	0	0	0	0	0	0	0	0	0	0	0	0	0	0	0	0
49	apaG	0	0	0	0	0	0	0	0	0	0	0	0	0	0	0	0	0	0	0	0	0	0	0.494293	0	0	0	0	0	0	0	0	0	0	0	0	0	0	0	0	0	0	0	0	0	0
50	rsmA	0.0984264	0.241998	0.209305	0.180693	0.474255	0.271631	0.415014	0.252644	0.37432	0.396226	0.416971	0.343115	0.312924	0.26322	0.448801	0.216643	0	0.273514	0.26776	0.241141	0.217308	0.289075	0	0.259651	0	0.164826	0.66189	0	0	0.249061	0.192332	0.148711	0.227983	0.228643	0.198147	0.193169	0.0127365	0.224984	0.357548	0.200377	0.108177	0.265753	0.227595	0.242377	0.232089
51	pdxA	0	1.33272	1.29119	1.17705	0.916987	1.36627	1.29888	1.34618	1.27393	1.27868	1.18611	0.527069	1.14828	1.35947	1.37074	0.716888	0.970424	1.37257	1.3629	1.34536	1.32131	1.36217	1.01449	1.15459	1.00474	1.49223	1.26172	1.47691	0.27867	1.35534	1.26974	1.57127	1.37685	1.31563	1.29704	1.26638	1.25224	1.30884	1.23699	1.29388	1.24478	1.36276	1.3123	1.33274	1.11548
52	surA	0.111864	0	0	0	0	0	0	0	0	0	0	1.47246	0	0	0	-0.189325	0	0	0	0	0	0	0	0	0	0	0	0.0365335	-0.488687	0	0	0	0	0	0	0	0	0	0	0	0	0	0	0	0
53	lptD	0	0	0	0	0	0	0	0	0	0	0	0	0	0	0	0	0	0	0	0	0	0	0	0	0	0	0	0	0	0	0	0	0	0	0	0	0	0	0	0	0	0	0	0	0
54	djlA	0	0	0	0	0	0	0	0	0	0	0	0	0	0	0	0	0	0	0	0	0	0	0	0	0	0	0	0	0	0	0	0	0	0	0	0	0	0	0	0	0	0	0	0	0
55	yabP	-0.0308662	-0.331157	-0.503236	-0.523238	-0.412327	-0.393359	-0.51412	-0.422505	-0.437302	-0.432353	-0.624764	-0.561482	-0.338721	-0.51412	-0.301536	-0.00742995	-0.0996217	-0.494884	-0.509287	-0.422505	-0.457271	-0.577783	-0.487066	-0.721311	-0.827762	-0.51889	-0.616249	-0.401506	-0.208017	-0.342862	-0.534715	-0.301923	-0.418165	-0.57847	-0.381783	-0.65114	-0.764196	0.780159	-0.604006	-0.609167	-0.453075	-0.509287	-0.361319	-0.442268	0
56	rluA	0.00141211	0.399891	0.00558994	0.108228	0.0131658	0.198801	0.105817	0.169655	0.154858	0.159807	0.16184	0.114011	0.181634	0.105817	0.0867385	0.0785161	0.180895	0.125054	0.110651	0.169655	0.134889	0.0631232	0	0	0	0	0.141627	0.000929155	0	0.100968	0	0	0.428715	0.041467	0.0992652	0	0	0	0.0159319	0.0107702	0.0279739	0.110651	0.335143	0.066558	0.0908452
57	rapA	0	0	0	0	0	0	0	0	0	0	0	0	0	0	0	0	0	0	0	0	0	0	0	0	0	0	0	0	0	0	0	0	0	0	0	0	0	0	0	0	0	0	0	0	0
58	polB	-0.445303	2.37255	2.31159	2.11548	2.06916	2.42146	2.41181	2.39232	2.37752	2.38247	2.30117	2.25334	2.18888	2.41181	2.22607	1.59352	2.36257	2.43105	2.41665	2.39232	2.35755	2.23704	2.10553	2.06458	1.97377	2.29593	2.08746	1.45943	0.960829	2.40696	2.28011	2.29068	2.22055	2.34746	2.32193	2.27479	2.05063	2.3373	2.32193	2.31677	2.25064	2.41665	2.34239	2.37255	2.14684
59	araD	-0.0511142	-0.271756	-0.336978	-0.32181	-0.299464	-0.223042	-0.232148	-0.259256	-0.0814833	-0.121375	-0.207546	-0.141183	-0.203069	-0.23976	-0.350853	-0.419467	-0.0274475	-0.213996	-0.227587	-0.250544	-0.288476	-0.271677	0	0.0289314	0.0132925	-0.205594	-0.267929	-0.0696954	0	-0.244609	-0.300037	-0.282348	0	-0.30056	-0.251796	-0.161438	-0.343155	0	-0.145005	-0.332089	0	-0.227587	-0.232486	-0.27732	-0.281108
60	araC	0.072289	0.663794	0.602826	0.606717	0.518898	0.8712	0.703054	0.683557	0.86876	0.67371	0.592409	0.744581	0.580123	0.703054	0.717308	0.5655	0.345416	0.72229	0.707887	0.783557	0.848792	0.761479	0.151762	0	0.375642	0.494814	0.478703	0.435169	0	0.698204	0.459375	0.581917	0.770287	0.638703	0.613168	0.72453	0.341866	1.57753	0.505212	0.808006	0.519194	0.707887	0.633632	0.614277	0.538081
61	yabI	0.112835	0	0	0	0	0	0	0	0	0	0	0	0	0	0	0	0.419218	0	0	0	0	0.156621	0.431266	0.635641	0	0.240449	0	0.233658	0.235826	0	0.139966	0	0	0	0	0	0	0	0.134946	0	0.0283529	0	0	0.0618959	0
62	thiQ	0	-0.101676	-0.0421325	0	-0.0543631	-0.098947	-0.106568	0	-0.11101	-0.068204	0	-0.0137221	-0.0497285	0	-0.0451282	-0.0332528	0.0321726	-0.0913765	-0.102751	-0.121965	-0.0776261	0	-0.19709	0	-0.195441	-0.100648	-0.146537	0	0	0	0	-0.0996708	-0.144232	-0.0496962	-0.0898894	-0.0147785	-0.0241253	-0.00237595	0	-0.0380414	0	-0.102751	-0.073728	-0.0237809	-0.130727
63	thiP	-0.0920148	-0.288122	-0.503862	-0.324796	-0.126809	-0.365577	-0.371416	-0.444197	-0.278489	-0.419942	-0.139104	-0.253192	-0.497767	-0.4247	0	-0.500444	0	-0.359776	-0.368492	-0.383214	-0.190149	-0.474475	0	-0.243002	-0.376733	-0.365257	0.0378227	0.178468	-0.0948421	-0.42955	-0.160166	-0.121002	-0.293847	-0.339203	-0.146521	-0.304331	-0.325705	-0.248023	-0.514586	-0.500727	-0.387757	-0.368492	-0.134138	-0.452069	-0.176189
64	thiB	0	0.952223	0.748398	0.552289	0.505974	0.858276	0.991483	0.829129	1.14604	0.819282	0.880839	1.26158	0.625695	0.848626	0.66288	0.399617	0.597234	0.867862	0.853459	0.829129	0.794364	1.04313	1.58834	0.530324	0.56673	0.732745	0.513468	1.15524	0.0986257	0.843776	1.00263	0.870346	0.80022	0.927132	0.901597	0.711606	0.487438	0.774115	0.75874	0.896435	0.687449	0.853459	0.779204	0.809366	0.810077
65	sgrR	0	0.310201	0.221589	0.0165456	0.390948	0.34361	0.339231	0.532201	0.62046	0.317533	0.228935	0.210107	0.129724	0.336475	0.301503	0	-0.289039	0.353455	0.675117	0.326877	0.299108	0.0519046	1.52217	0.0634417	0	0.253545	0.33053	0.0436412	-0.373787	0.533367	0.201417	0.246902	0.114597	0.265922	0.250165	0.193119	0.385222	0.284136	0.208209	0.189871	0.351274	0.342805	0.26254	0.304895	0.0799252
66	sgrS	0.118038	0	0	0	0	0	0	0	0	0	0	0	0	0	0	0	0	0	0	0	0	0.230935	0	0	-0.0210443	0	0	0	0	0	0	0	0	0	0	0	0	0	0	0.108825	0	0	0	0	0
67	sgrT	0	0	0	0	0	0	0	0	0	0	0	0	0	0	0	0	0	0	0	0	0	0	0.175578	0	0	0	0.204753	0	0	0	0	0	0	0	0	0	0	0	0	0	0	0	0	0	0
68	setA	0.150648	0.902294	0.779372	1.19235	0.946666	0.933084	0.930992	1.17304	0.823794	0.909542	0.798845	0.793652	0.687638	0.92603	1.09152	0.971119	0.777741	0.945053	0.898701	0.920452	0.891328	1.97483	0.379988	0.625552	0.453166	0.846285	0.912362	0.883767	0.409888	0.883346	0.76195	0.837482	0.641407	0.837646	1.0246	0.750202	1.0831	0.876526	1.31055	0.740938	0.966367	0.934525	1.0346	0.892743	0.823224
69	leuD	0	0.151426	0.412572	0.0442693	0.186358	0.198138	0.173877	0.454455	0.288428	0.157097	0.304284	0.164475	0.350112	0.19262	0.27326	0	0	0.184877	0.135866	0.148707	0.142848	0	0	0.266755	0.529247	0.107611	0	0.107067	0.673874	0.226598	0.37346	0.123348	0.630321	0.312014	0.0761695	0.400129	0.307808	0.131268	0	0.309018	0.272406	0.176641	0.106615	0.187509	0.253313
70	leuC	-0.284349	1.17255	0.953391	1.01062	0.880525	1.14675	1.18857	1.02433	1.10271	1.1766	1.00396	1.25898	0.884519	1.14281	1.77442	0.890618	0.974864	1.19642	1.21238	1.21484	1.16643	1.15688	1.02723	1.05431	0.980511	1.1413	1.07757	0.485377	0.598208	1.33543	1.13043	1.0934	1.36492	1.0686	1.17671	1.05574	0.858828	1.15817	1.21751	1.04828	0.801755	1.19054	1.1393	1.08447	0.956747
71	leuB	-0.0579931	0.652056	0.73492	0.527366	0.565566	0.806126	0.688112	0.701463	0.670992	0.661163	0.71439	0.515557	0.667117	0.797263	0.385196	0.387909	0.442309	0.705779	0.688183	0.588554	0.638278	0.519676	0.514101	0.496662	0.504971	0.581686	0.808865	0.540754	0.206465	0.65389	0.668034	0.68601	0.56158	0.647755	0.600599	0.836154	0.392873	0.619681	0.592438	0.621123	1.21723	0.692551	0.728545	0.862184	0.469504
72	leuA	-0.180007	0	0	0	0	0	0	0	0	0	0	0	0.588752	0	0	0	0.147899	0	0	0.748074	0	0	0	0	0	0	0.355919	0	0.394238	0	0	0	0	0	0	0	0	0	0	0	0	0	0	0.0748842	0
73	leuL	0	-0.941972	-0.859541	-0.959049	-0.758567	-0.893062	-0.862713	-0.842209	-0.857006	-0.868658	-0.773357	-0.901185	-0.248131	-0.822713	-0.881661	-0.391182	-0.0719466	-0.883476	-0.897879	-0.263737	-0.916974	-0.841211	-0.802195	-0.80742	-0.718312	-0.898593	-0.00847418	-0.571434	-0.245411	-0.907562	-0.73102	-0.777052	-0.817699	-0.600266	-0.872598	-0.816333	-0.620827	-0.897223	-0.825801	-0.635688	-0.678421	-0.771082	-0.812134	-0.566279	-0.677815
74	leuO	0.407215	0	0	0	0	0	0	0	0	0	0	0	-0.215628	0	0	-0.197087	-0.285076	0	0	-0.13387	0	0	0.244144	0	0	0	-0.442233	-0.113518	-0.384481	0	0	0	0	0	0	0	0	0	0	-0.0447867	-0.0824279	0	0	0	0
75	ilvI	-0.633391	0.134055	0.323087	0	-0.104021	0.182965	0.173314	0.403818	0.139021	0	0.0626703	0.264842	0	0.173314	0.383809	-0.0810463	-0.000749418	0.192551	0.178148	0.153818	0.119053	0	0.263276	0	-0.00602394	0.0574337	0	-0.387205	0	0.168465	0.0416087	0.0521779	0.232052	0.108964	0.0834289	0.0362949	0	0.0988041	0.0834289	0.0782672	0.0121376	0.178148	0.103893	0.134055	0.408342
76	ilvH	0.0868056	-0.40654	-0.267508	-0.305121	-0.130632	-0.199134	-0.367281	-0.386777	-0.401574	0.61088	-0.377925	-0.225753	-0.590211	-0.367281	-0.136034	-0.335376	-0.957878	-0.348045	-0.362448	-0.386777	-0.421542	-0.442055	-0.415064	-0.485583	-0.490829	-0.383162	-0.391632	-0.783726	-0.301424	-0.27213	-0.498986	-0.388417	-0.258543	-0.431631	-0.457166	-0.4043	-0.428468	-0.341791	-0.457166	-0.162328	-0.428458	-0.362448	-0.436702	-0.40654	-0.273757
77	cra	0	0	0	0.146021	0.237815	0.101078	0	0	0	1.28549	0.110438	0	0.0269586	0.0707268	0	0	0	0	0	0	0	0.262168	0	0	0	0	0.0567117	0	0.0456234	0.0295377	0	0	0.0201009	0.0640914	0	0	0	0	0	0.034914	0	0	0	0	0.0927925
78	mraZ	0	0.683278	0.467456	0.121321	0.389859	0.563553	0.597538	0.578042	0.625745	0	0.452382	0.522999	0.383246	0.496243	0.588146	0.548231	0.360995	0.616774	0.602371	0.523405	0.543276	0.578796	0.485431	0.380201	0.433406	0.481657	0.151437	0.515457	-0.298047	0.583458	0.653332	0.431357	0.358715	0.674719	0.550466	0.417166	0.412515	0.44231	0.507652	0.55408	0.275245	0.602371	0.528116	0.683278	0.407352
79	rsmH	0.0436862	0	0.184709	0.393497	0.0814192	0.0240969	0	0	0	0.387615	0	0.0821321	0.0908744	0.158386	0.043533	0.108276	0.31108	0	0	0.109273	0	0	0.514651	0.0480702	0	0	2.00527	0	0	0	0	0.090089	0.0825584	0	0.039372	0.0867041	0.0226707	0	0	0	0.322232	0	0	0	0.167433
80	ftsL	0.0389797	0	0	0	0	0	0	0	0	0	0	0	0	0	0	0	0	0	0	0	0	0	0.0404608	0	0	0	0	0	0	0	0	0	0	0	0	0	0	0.258296	0	0	0	0	0	0	0
81	ftsI	-0.152289	1.42308	1.19958	1.35719	1.64473	1.30289	1.29806	1.43845	1.22694	1.34328	1.23423	1.32123	1.27013	1.28046	1.21542	1.02326	0.33476	1.26858	1.25737	1.6196	1.25586	1.13938	1.38761	1.20071	0.906635	1.45448	0.960483	0.844536	1.3229	1.44984	1.35118	1.34939	1.29568	1.40356	1.22377	1.13741	1.70747	2.52916	1.33926	1.17969	1.339	1.30182	1.24407	1.26752	1.22892
82	murE	-0.233536	0.381363	0.357864	0.51547	0.00301112	0.461171	0.456342	0.396734	0.585225	0.501562	0.792508	0.279516	0.22841	0.438744	0.573703	0	-0.139016	0.626859	0.615657	0.208092	0.414139	0.400002	0.232683	0.158989	0.339693	0.29577	0	0.00281877	0.0308297	0.408126	0.30946	0.307671	0.253965	0.361847	0.382057	0.495693	0.201365	0	0.497542	0.537972	0.380292	0.460101	0.402348	0.425807	0.187205
83	murF	-0.356268	-0.0950963	0	-0.306058	-0.676838	-0.333405	-0.231944	-0.25144	-0.377348	-0.372399	-0.277592	-0.501528	-0.449521	-0.343055	-0.417689	-0.0416978	-0.581079	-0.323819	-0.227111	0.84893	-0.397317	0.488318	0.687445	-0.233303	0.211087	-0.347825	-0.00326346	-0.0477904	0.585789	-0.347904	-0.252538	-0.288084	-0.423206	-0.407405	-0.321829	-0.368963	-0.528135	-0.417565	-0.43294	-0.21588	0	-0.338222	-0.190254	-0.382314	-0.490758
84	mraY	-0.271182	0.238222	0.248683	0.0229284	-0.0399072	0.186058	0.0631961	0.115128	0.0289029	0.0338521	0.0954091	0.190438	-0.0240885	0.0631961	0.0917363	0	-0.127535	0.0824323	0.139458	0.0652813	0.00893447	0	0.0279909	-0.133762	-0.0758423	0.388024	0.0361097	0.145946	0.119654	0.242987	0.113423	0.1267	0	0	0	0	0	0	0.187596	0.182435	0.116305	0.0680292	0.0652032	0.0239366	-0.0277116
85	murD	-0.0115293	-0.486603	-0.547571	0	0.0347737	-0.437694	-0.197344	-0.46684	-0.481637	-0.226688	-0.557988	-0.605817	0	-0.447344	-0.63309	-0.736584	-1.4647	-0.428108	-0.442511	-0.46684	-0.105365	-0.622118	-0.107383	-0.232205	0	-0.563225	0.423261	-0.753485	0.26048	-0.452193	0.0379086	-0.56848	-0.638607	-0.511694	-0.53723	-0.0843635	-0.808532	-0.521854	-0.0372295	-0.542391	-0.608521	-0.442511	-0.266765	-0.486603	-0.455388
86	ftsW	0.179532	0.241298	0.182284	0.804396	0.285885	0.277288	0.270187	0.255841	0.244952	0.248594	0.148675	0.153575	0.48882	0.477653	0.257327	-0.116195	0.146218	0.284342	0.273744	0.255841	0.0300292	0.081438	0.571147	0.1356	0.687916	0.771385	0.576385	0.148204	0	0.397515	0.00370633	0.142712	0	0.202788	0.172271	0.54376	0.272658	0.227498	0.2748	0.331143	0.105037	0.273744	0.212028	0.241298	0.0752075
87	murG	0	0.20066	0.106211	0	0.126663	0.234805	0.228068	0.214457	0.204127	0.207582	0.337146	0.117436	0	0.196294	0.0524058	0.669385	0.743201	0.241497	0.231442	0.214457	1.7089	0.385537	0	0.037851	0.0457759	0.60694	0.147657	0.0937687	0.181015	0.204635	1.49004	0.169598	1.43605	0.276304	0.312973	0.00520843	0.0978502	0.220563	0.424751	0.141667	0.33186	0.231442	0.15366	0.20066	0.0430872
88	murC	0	0.649427	0.822696	0.396239	0.563776	0.684495	0.677576	0.663597	0.652988	0.656537	0.546359	0.563954	0.601202	0.666361	0.645815	0.0709025	0	0.691368	0.681041	0.663597	0.20308	0.474436	0.668117	0.588294	0.624234	0.597914	0.692672	0.209875	0.216911	0.667023	0.193927	0.845224	0.309435	0.605494	0.57201	0.838553	0.613703	0.438011	0.528224	0.602353	0.501776	0.681041	0.736292	0.649427	0.487596
89	ddlB	0.0576514	-0.337511	-0.271137	-0.491458	-0.751839	-0.297868	-0.30569	-0.321492	-0.333485	-0.308421	-0.353264	-0.58429	-0.254802	-0.30569	-0.645715	0	-0.48373	-0.269046	-0.301772	-0.416229	-0.328618	-0.521033	-0.356723	-0.595261	-0.192408	-0.152289	-0.231555	0	-0.467365	-0.30962	-0.465072	-0.220352	-0.161402	-0.564994	-0.0627548	-0.100958	-0.538711	0.857872	-0.378544	-0.382728	-0.0679067	-0.301772	-0.225115	-0.295405	-0.478351
90	ftsQ	0	-0.359809	-0.475082	-0.255932	-0.0514775	-0.343334	-0.346584	-0.353152	-0.358136	-0.282784	-0.236486	-0.133024	-0.61115	-0.346584	-0.0723092	-0.275324	0	-0.266421	-0.344956	-0.18473	-0.291178	-0.163351	-0.467022	-0.0643281	-0.180699	-0.0199811	0	-0.633002	-0.399397	-0.348218	-0.0751589	-0.537543	-0.655901	0	-0.271598	-0.287475	0	0	-0.376862	-0.3786	-0.611402	-0.344956	-0.391021	-0.21244	-0.28847
91	ftsA	-0.478355	0	0	0	0	0	0	0	0	0	0	0	0	0	0	0.645003	-0.687184	0.397566	0	0	0	0.203555	0	0.060028	-0.173316	0.262449	-0.214466	0	0	0	0	0	0	0	0.288444	0	0	-0.196181	0	0	0	0	0	0	0
92	ftsZ	-0.636595	2.59495	2.53398	2.33787	2.29155	2.64386	2.63421	2.61471	2.59991	2.60486	2.52356	2.47573	2.41128	2.63421	2.44846	2.81592	1.58496	2.65344	2.63904	2.61471	2.57994	2.45943	2.32793	2.3159	2.20945	2.51833	2.30986	1.68182	2.18322	2.62936	2.5025	2.51307	2.44294	2.56986	2.54432	2.49719	2.27302	2.5597	2.54432	2.53916	2.47303	2.63904	2.56478	3.59495	3.36923
93	lpxC	0	0	0	0	0	0	0	0	0	0	0	0	0	0	0	0	0	0	0	0	0	0	0	0	0	0	0	0	0	0	0	0	0	0	0	0	0	0	0	0	0	0	0	0	0
94	secM	0.369797	0.978895	1.04293	0.721818	0.800503	1.0278	1.01815	0.998659	0.983862	0.988811	0.907511	0.859682	0.920224	1.01815	0.957409	1.06323	0.343911	1.03739	1.02299	0.998659	1.08889	0.84338	0.836876	1.19985	0.718402	0.902274	0.693804	0.638893	0.451773	1.01331	1.01145	1.02202	0.826892	0.953804	1.17827	0.881135	0.906967	1.06864	1.05327	0.923108	0.981978	1.02299	0.948733	0.978895	0.878183
95	secA	0.0896292	1.30747	1.35863	0.986804	1.11621	1.46045	1.45886	1.43936	1.42457	1.42368	1.34822	2.59287	1.23593	1.45886	1.68898	1.93305	0.909616	1.4781	1.46369	1.93936	1.4046	1.28408	1.15258	0.990172	2.05846	1.34298	1.13451	1.29896	2.59284	1.39144	1.32715	1.33772	1.17835	1.39451	1.36524	1.28396	1.51085	0.724416	1.36897	1.31173	1.29768	1.46369	1.38944	1.4196	1.19389
96	mutT	0	0	0	0	0	0.0161221	0	0	0	0.0116747	0	0	0	0	0.0267131	0	0	0	0	0	0	0	0	0	0.273213	0	0	-0.268464	0	0.0863943	0	0	0.178501	0	0	0.0757604	0.173651	0.445703	0	0.104169	0	0	0	0	0
97	yacG	0	0.224266	0	0.351438	0	0	0	0	0	0	0	0	0	0	0.141549	0	-0.0603699	0	0	0	0	0	0	0.30077	0	0	0	0	0	0.0387511	0	0	0	0	0.00746385	0	0	0.874163	0	0	0	0	0	0	0
98	zapD	0.0207608	0	0.336177	0	0.436737	0.347323	0.148351	0.0949133	0.145286	0.139003	0	0.0319508	0	0.157954	0	0.212476	0.147245	0.16248	0.173407	0.134031	0.0730969	0.771407	0.0722776	0.815387	0	0.392988	0.271171	0	0	0.0576799	0.319307	0.100117	0	0.101085	0.225869	0	0.282189	0	0.0787969	0	0.0643309	0.151901	0.0921364	0.118987	0.259035
99	coaE	0.0994332	0.849179	0.353581	0.819077	0.124771	0	0.670046	0.724352	0.620081	0.624043	0.793524	0.60273	0.693183	0.63766	0.470495	0.0745413	0.110018	0.678217	0.63769	0.661764	0.903634	0.307229	0.701717	0.187375	0.300746	0.409967	0.246379	0.0546099	0.360023	0.649436	0.342058	0.553403	0.530501	0.642711	0.791751	0.59491	0	0	0.637516	0.639908	0.524895	0.672099	0.648915	0.654213	0.468996
100	guaC	0.163004	0	0.13895	0	0	0.869462	0	0	0	0	0	0	0	0.0425542	0.074142	0.044066	0	0	0	0	0	0.259451	0	0.0199848	0.139661	0.000606924	0.0629678	0.133992	-0.102974	0	0.109323	0	0	0	0	0.029773	1.17406	0.231013	0	0	0.0542508	0	0	0	0
101	hofC	-0.0551192	0.420784	0.419258	0.266218	0.502287	0.466313	0.323233	0	0.463934	0.468223	0.192009	0.175979	0.096446	0.321538	0.158389	-0.18327	-0.369009	0.341107	0.495468	0.305117	0.396706	0	0	0	0.10342	0.250597	0.188828	0.284425	0.844186	0.488485	0.492098	0.528459	0.115743	0.263438	0.213063	0.193774	0.30887	0.321895	0.212161	0.233208	0.343873	0.327724	0.217981	0.28264	0.258435
102	hofB	-0.162592	0	-0.128357	0	-0.001501	0	-0.0281298	0.974758	0	-0.0574737	-0.138774	-0.186602	-0.108203	0	-0.213875	-0.06689	-0.490655	-0.00889356	-0.0232966	-0.047626	-0.0823914	0.508462	1.16324	1.05742	-0.0953237	0	-0.0667663	0	0	-0.0329792	-0.0169783	0.052823	0	-0.0924802	-0.118015	0	-0.020037	-0.10264	-0.118015	-0.123177	-0.0464494	-0.0232966	-0.0975512	-0.0673892	-0.150245
103	ppdD	0.0106057	0	0	0	0	0	0	0.248264	0	0	0	0	0	0	0	0	0	0	0.0139705	0	0	1.31798	0.104323	0.0411364	-0.125728	-0.00470558	0.610512	-0.0770464	0	0	0.000100223	-0.0099613	0.118454	0	0	0	0	0	0.079823	0	0	0	0.118056	0.0119169	0
104	nadC	0	0	0	-0.0802176	0	0	0	0	0	0	0	-0.0304073	0	0	-0.0576802	-0.213281	-0.185248	0	0	0	0	0	0	0	0	0	0	0	0	0	0	0	0	0	0	-0.00895416	0.208696	0	0	0	0	0	0	0	0
105	ampD	-0.11289	0.57395	0.446315	0.0382992	0.681886	0.556192	0.475215	0.477393	0.512249	0.517198	0.608229	0.974388	0.390279	0.546542	0.379705	0.206248	0.0478387	0.565779	0.61257	0.527046	0	0.241505	0.619398	0.959354	0.484697	0.427507	0	0.746581	0.129121	0.541693	0.54815	0	0.290664	0.482192	0.488981	0.381465	0.46915	0.424234	0.507359	0.451495	0.518699	0.615364	0.45351	0.504899	0.759565
106	ampE	-0.160798	0	0	0.576356	0	0	0.106991	0	0	0	0	0.711263	0	0	0.0716382	0	0.181872	0	0.00401759	0	1.67805	0	0	0	0.0726309	0.104732	0.788047	0.137547	0.645754	0	0	1.5889	0.161387	0	0.0515134	0.0420874	0.282603	0.071697	0	0	0	0.00401759	0	0	0
107	aroP	0.343846	0.411437	0.683802	1.01601	0.441378	0.460346	0.450696	0.4312	0.416403	0.421352	0.340052	0.625557	0.227766	0.450696	0.264951	0.96574	0.263107	0.469932	0.455529	0.4312	0.396435	0.275922	1.67274	0.132394	1.02594	0.334815	0.126345	0.498314	0.463818	0.445847	1.18064	0.662893	0.259434	0.386346	0.360811	0.313677	0.951163	3.33605	0.360811	0.355649	1.15117	0.455529	0.381275	0.411437	0.519057
108	pdhR	0.525794	2.24829	2.43733	1.99122	1.9449	2.2972	2.28755	2.26806	2.25326	2.25821	2.17691	2.12908	2.06462	2.28755	2.10181	1.66739	1.81143	2.30679	2.29239	2.26806	2.23329	2.11278	1.98127	1.96925	1.8628	2.17167	1.9632	1.58517	1.08657	2.2827	2.15585	2.16642	2.09629	2.2232	2.19767	2.15053	2.05137	2.21304	2.19767	2.19251	2.12638	2.29239	2.21813	2.24829	2.27258
109	aceE	0	0	0	0	0	0	0	0	0	0	0	0	0	0	0	0	0	0	0	0	0	0	0	0	0	0	0	0	0	0	0	0	0	0	0	0	0	0	0	0	0	0	0	0	0
110	aceF	0.113677	1.24989	1.30004	1.10393	1.05761	1.2988	1.28915	1.26966	1.25486	1.25981	1.28962	1.13068	1.28844	1.28915	1.21452	1.00501	0.814344	1.30839	1.29398	1.26966	1.23489	1.11438	0.982872	1.08196	1.24878	1.17327	1.46029	0.558992	0.523714	1.2843	1.15745	1.39024	1.209	1.2248	1.31038	1.26324	1.21518	2.60737	1.19927	1.80071	1.23909	1.29398	1.21973	1.361	1.02418
111	lpd	-0.5765	1.28224	1.06278	0.866668	0.820353	1.17265	1.163	1.14351	1.12871	1.23366	1.15236	1.00453	0.940074	1.163	0.977259	0.761708	0.372257	1.18224	1.16784	1.14351	1.26724	0.98823	0.956725	0.944703	1.22894	1.14712	0.838654	0.410622	0.0927556	1.15815	1.0313	1.14187	0.971742	1.09865	1.07312	1.22598	0.801817	1.08849	1.07312	1.06796	1.00183	1.16784	1.09358	1.12374	1.09803
112	yacH	-0.0774567	0.250698	0.332587	0.136478	0.090163	0.299608	0.289957	0.270461	0.398521	0.403471	0.179313	0.357908	0.352741	0.289957	0.532783	-0.0997603	-0.187858	0.309194	0.294791	0.413318	0.235696	0.115183	0.126535	0.400227	0.150919	0.316934	0.108464	0.588274	0.70709	0.285108	0.158252	0.311678	0.241552	0.225607	0.342929	0.152938	0.071627	0.215447	0.200072	0.337767	0.271638	0.294791	0.363393	0.250698	0.0249852
113	acnB	-1.15007	-0.811613	-0.872581	-1.06869	-0.115005	-0.762703	-0.772353	-0.79185	-0.806647	-0.801697	-0.882997	-0.930826	-0.995284	-0.772353	-0.958099	-0.00567991	-1.8216	-0.753117	-0.76752	-0.79185	-0.826615	-0.947128	-0.0786325	-0.090655	-1.19711	-0.888234	-1.0967	-1.72474	-0.223338	-0.777203	-0.904059	-0.89349	-0.963616	-0.836704	-0.862239	0.0906272	-1.13354	-0.846864	-0.862239	-0.867401	-0.93353	-0.76752	-0.841775	0.188387	-1.03733
114	yacL	-1.03862	1.12283	1.56187	0.865758	0.819442	1.17174	1.16209	1.1426	1.1278	1.13275	1.05145	1.00362	1.43916	1.16209	1.76883	1.13629	0.61285	1.18133	1.16693	1.1426	1.10783	0.98732	1.35581	0.843792	0.737341	1.04621	2.24142	0.709712	-0.28889	1.15724	1.03039	1.04096	0.970831	1.09774	1.07221	1.52507	0.800906	1.08758	1.07221	1.06705	1.00092	1.16693	1.59267	1.12283	1.39712
115	speD	0	-0.230567	-0.291535	0	0	-0.181657	-0.191307	-0.210804	0	-0.220651	-0.301951	-0.34978	0	-0.191307	-0.377053	-0.00959645	0	-0.172071	-0.186474	-0.210804	-0.245569	-0.366082	-0.497587	-0.509609	-0.61606	-0.307188	-0.515658	-1.14369	0	-0.196157	0	-0.312444	0	-0.255658	-0.281193	-0.328327	-0.0524949	-0.265818	-0.281193	-0.286355	-0.352484	-0.186474	-0.260729	-0.230567	0
116	speE	-0.17686	0.0402673	0.0199446	0	0.256129	0.0565705	0.0533538	0.046855	0.241923	0	0.0164724	0.0338629	0.34571	0.0533538	0	0	0	0.0597658	0.0549648	0.046855	0.235267	0	0.317927	0	0.17593	0	0.209397	0	0	0.0517373	0.209452	0.212975	0.3896	0.0319036	0.0233919	0	0.132958	0.028517	0	0	0.166295	0.0549648	0.0302133	0	0
117	yacC	0	0.884137	0.843492	1.05936	0.681876	0.916744	0.91031	0.897313	0.887448	0.98048	0.836547	0.971328	0.595023	0.91031	0.781129	0.790153	0.635249	0.923134	0.913532	0.897313	0.874136	0.790729	0.539457	0.790142	0.362981	0.904761	0.429916	0.382983	0.409474	0.907077	0.822506	0.829553	0.782802	0.86741	0.850387	0.886264	0.669519	0.860637	0.990006	0.98549	0.636192	0.913532	0.864029	1.00836	0.899306
118	cueO	-0.51082	0.962107	0.921461	0.617417	0.759845	0.994713	0.98828	0.975282	0.965417	1.17385	0.914517	1.0493	1.67299	0.98828	0.867125	0.480069	0.722807	1.0011	0.991502	0.975282	0.952105	0.873296	1.11743	0.730062	1.23343	1.12517	1.30037	1.0014	0.368196	0.985047	0.900476	0.907522	0.860771	0.945379	0.928356	1.11328	0.747488	0.938606	0.858546	0.855642	1.21416	0.991502	0.941999	1.29623	0.97881
119	gcd	-0.199581	2.01986	1.84876	1.77426	1.57049	2.08024	2.06991	1.98959	2.0363	1.92519	1.89473	1.91212	1.84766	2.06991	1.88485	1.50231	1.52135	2.08316	2.05716	2.0511	2.01633	1.89582	1.76432	1.75229	1.72896	1.95471	2.50241	1.3198	1.51585	2.06575	1.89051	1.94946	1.87933	2.00624	1.93011	1.93358	1.67757	1.99608	1.98071	1.97555	1.86255	2.07324	2.00117	2.03134	1.80562
120	hpt	-0.180779	0.0229455	0.243213	0	0.314915	0	0.00136271	0.123014	0	0.23213	0.130435	0	0	0.00136271	0	0	0	0.0133439	0.0365364	0	0	0	0	0	0.333768	0	0.072634	0.0968294	0	0	0.0967533	0	0	0	0.101189	0	0.0636841	0	0	0	0.0937299	0.00437303	0	0	0
121	can	-0.0485776	1.11996	0.784079	0.798813	0.673355	1.15029	1.09804	1.87661	1.08569	1.01481	1.05631	0.935882	0.947149	1.09804	1.10639	0.545568	0.552011	1.10219	1.08366	1.0834	1.16997	0.861779	0.831894	1.73324	0.562318	1.02272	0.888547	0.851377	0.699622	1.09539	0.927017	1.07433	0.944047	1.03018	0.926939	1.04076	0.886957	1.03753	1.23992	0.930158	0.787247	1.09909	1.02407	1.03415	0.925125
122	yadG	-0.257507	0.526248	0.473761	0.485538	0.345202	0.35551	0.454943	0	0.557812	1.14444	0.429998	0.567777	0.462935	0.454943	0.211411	0.520836	0.0513085	0.461517	0.552426	0.450222	0.362569	0.584424	0.643678	0	0.411474	0.510109	0.374489	0.057697	0.088545	0.453585	0.496154	0.521898	0.623277	0.582718	0.4655	0.445621	0.683022	0.450808	0.420683	0.574848	0.657836	0.456595	0.46141	0.511656	0.293883
123	yadH	-0.00364246	0.100901	0.047876	0	0	0.264	0.113628	0.471659	0.0426374	0	0.27426	0	0	0.113628	0.246757	0.177924	0.1385	0.120362	0.0413295	0.105303	0.171821	0.163912	0.0393401	0.132701	0	0	0.308555	0	0.577852	0.1117	0.0149019	0.0821641	0	0.133605	0.0688961	0.134376	0	0.0896794	0	0.0849833	0.239658	0.11532	0	0.222481	0.1435
124	yadI	-0.215846	0.396374	0.236595	0.209964	0.330467	0.38844	0.306284	0.146165	0.11948	0.103338	0.460532	0.482523	0.214512	0.306284	0.278638	0	0.466808	0.314139	0.316241	0.298484	0.0796227	0.0936144	0.0589808	0.110577	0.518023	0.293563	0	0.122051	0.0726279	0.304329	0.327809	0.195535	0.327755	0.211635	0.157969	0.112689	0	0.162586	0.624123	0.440297	0.455015	0.308258	0.453594	0.100198	0.272194
125	yadE	-0.128905	0	0	0.349081	0	0	0.0657333	0.136865	0.360101	0.260348	0.104081	0	0.712567	0.0657333	0	0.336817	0.520368	0.0678829	0.0873667	0.063982	0.333223	0.455242	0	0.22495	0.197084	0.334581	0	0.641089	0	0.0652571	0.382989	0.23124	0	0.0995785	0.237004	0.514354	0.743301	0.234331	0.082711	0	0	0.0662734	0	0.257083	0
126	panD	-0.0631864	0.251348	0.409289	0.410661	0.133474	0.280358	0.280447	0.370475	0.352515	0.215302	0.0533586	0.109629	0	0.280447	0.134484	0.0698762	0	0.29382	0.275889	0.266734	0.350372	0	0.280577	0	0	0	0.475747	0.322276	0.433347	0.277052	0.0698659	0.319474	0.143168	0.229632	0.281037	0.045847	0.0949174	0.293373	0.0584506	0.17901	0.084477	0.283807	0.211078	0.320138	0.0694088
127	yadD	0	0.821717	0.314238	0.715266	0.862696	1.1626	1.02721	0.705447	0.741472	0.859197	0.692117	1.34723	0.999333	0.798294	0.852163	0.266735	0.0452208	0.787703	0.803551	1.00279	0.706488	0	0.727439	0	0	1.06199	0.422166	0.147606	0.32284	0.800989	1.0822	0.712965	0.780359	0.839806	1.19435	1.01308	0.701296	0.774596	1.01555	1.18371	0.899976	0.478364	0.857627	0.403389	0
128	panC	-0.261125	0.0856309	0.398509	0	0	0.00228668	0.038411	0.0982508	0	0.0919624	0.333221	0.00693045	0	0.1107	0	0.147737	-0.0983028	0.122983	0.113786	0	0.111141	1.28711	0	1.03913	1.17172	0.036704	0	0	0	0.107604	0.295675	0	0.307474	0.0696089	0.029207	0.0232058	0	0.0631213	0	0	0	0.406959	0.0663708	0.459477	0.892588
129	panB	-0.057259	0.0607691	0	0	0.208604	0.25915	0.190488	0.0714842	0.234957	0.066145	0.0823076	0	0	0.0820544	0.124677	0.299066	0.319498	0.0924836	0.0846748	0.333111	0	0.530472	0.269919	0.571814	0.472762	0.0192275	0	-0.0433319	0.991176	0.0794252	0.107033	0.171722	0	0.0471656	0.0694658	0.0077667	0.162156	0.0416572	0.145934	0.203727	0.691585	0.144916	0.0444163	0	0
130	yadC	-0.30604	1.39856	1.35784	1.54388	1.28505	1.38134	1.39458	1.41475	1.34546	1.40668	1.31999	1.63293	1.23514	1.43072	1.23077	0.48443	0.968995	1.44648	1.43468	1.32754	1.73714	1.10647	0.907153	0.949165	0.875731	1.33578	0	0.505689	0	1.42675	1.29069	1.27969	1.26681	1.378	1.34503	1.31846	0.908261	1.36968	1.65287	2.15677	1.06637	1.4146	1.37384	1.41881	1.1931
131	yadK	-0.117365	0	0	0	0	0	0	0	0	0	0	0	0	0	0	0	0	0	0	0	0	0	0.154666	0	0	0	1.28068	0	0	0	0	0	0	0	0	0	0	0	0	0	0	0	0	0	0
132	yadL	-0.0472039	0	0	0.438524	0.282504	0	0	0	0	0	0	0	0	0	0	0.166991	0	0	0	0	0	0	0	-0.0426964	0	0	0	0	-0.451826	0	0	0	0	0	0	0	0.217074	0	0	0	0	0	0	0	0
133	yadM	0	-0.295344	-0.199085	-0.0832659	0	-0.422541	-0.432191	-0.340576	-0.244262	-0.239313	-0.320613	-0.146219	-0.191797	-0.209969	-0.395714	-0.103599	-0.013177	-0.412955	-0.427358	-0.340576	-0.264231	-0.495854	-0.340141	-0.393439	-0.171397	-0.371965	-0.756542	-0.810137	0	-0.325929	-0.119452	-0.442216	-0.447347	-0.496542	-0.299854	-0.281993	0.186638	-0.330594	-0.522077	-0.527238	-0.593368	-0.316247	-0.27939	-0.360339	-0.298834
134	htrE	0.213203	-0.313196	0.102133	0	0.859709	-0.0381417	-0.184148	-0.310596	0	-0.00379885	-0.401536	-0.387232	-0.519595	-0.0130957	0.601577	-0.345992	-0.101943	-0.181617	-0.18218	-0.0288189	0.148099	-0.297664	0	0	0	1.89383	-0.15334	0	0	0	-0.196573	0.0812238	-0.397136	-0.383988	-0.0117648	-0.860072	-0.877914	-0.0488672	-0.0172259	-0.183497	-0.618671	-0.0387755	-0.506455	0	0
135	yadV	0.00903271	-0.523703	-0.629836	-0.242071	-0.594349	-0.749848	-0.613491	-0.50654	-0.846263	-0.823185	-0.506748	-0.56888	-0.500975	-0.784544	-0.0342873	-0.269937	-0.159978	-0.596786	-0.610627	-0.788317	-0.36296	-0.67475	-0.453392	-0.251758	-0.268378	-0.289456	-0.968651	-0.860066	-0.926956	-0.815434	-0.732772	-0.476577	-0.591766	-0.478002	-0.87576	-0.0745873	-0.280914	-0.823283	-0.870299	-0.70919	-0.340146	-0.754031	-0.360606	-0.855429	-0.657191
136	yadN	0.328744	0	-0.0440517	-0.3844	0	0	0	0	0	0	0	0	0	0	0	0	-0.289348	0	-0.0316453	0	0	-0.15774	-0.535379	-0.664275	-0.70569	-0.0339884	0	-0.0817211	0	0	0	0	-0.250163	-0.109071	0	0	0	-0.0162256	0	0	0	0	-0.389442	0	-0.0462307
137	folK	-0.175763	-1.51886	-1.20643	-0.835333	-0.69403	-1.59348	-1.61553	-1.50066	-1.21185	-1.35308	-1.13724	-1.45215	-1.3787	-1.41816	-1.16439	-0.408584	0	-1.59781	-1.41188	-1.52822	-1.23802	-1.4637	-1.31843	-0.669348	-0.724465	-0.98579	-1.39987	-0.463956	-0.0924826	-1.22294	-1.11754	-1.27912	-1.0205	-1.35998	-1.40885	-1.347	-1.30196	-1.57121	-1.44707	-1.61097	-1.33526	-1.59792	-0.950063	-1.17825	-0.292476
138	pcnB	-1.1068	0.139468	0.0784999	0	0.169409	0.188378	0.178727	0.159231	0.477767	0.81605	0.0680833	0.0202547	0	0.178727	0.326315	0.222092	0.570127	0.197964	0.18356	0.159231	0.124466	2.85163	0.205781	3.08516	4.36296	0.0628466	0	0.226345	-0.908096	0.702199	0.0470217	0.0575909	1.18245	0.114377	0.0888418	0.0417079	0	0.43755	0.0888418	1.3528	0.0175505	0.18356	0.109306	0.139468	0.247088
139	gluQ	0.238917	0.86287	0.678525	0.429595	0.545348	0.739529	0.734163	0.723322	0.715094	0.717846	0.672803	0.646528	0.676251	0.734163	0.635746	0.38957	0.100539	0.74486	0.736851	0.723322	0.70399	0.666321	0.709984	0.559842	0.437565	0.963121	0.555402	0.664021	0.402557	0.731467	0.661232	0.668339	0.629345	0.699916	0.684207	0.658313	0.827011	0.692731	0.685717	0.682847	0.645042	0.736851	0.69556	0.712332	0.590792
140	dksA	0	1.20922	1.23951	1.37619	1.20518	1.26343	1.26122	1.25676	1.25337	1.2545	1.23804	1.23126	1.06887	1.26122	1.28201	0.924565	0.953771	1.26562	1.26232	1.25676	1.2488	1.28915	1.00772	1.16942	1.96367	1.04883	1.20777	1.18596	1.46337	1.26011	1.23506	1.25346	1.23741	1.26646	1.24098	1.2343	0.996545	1.24416	1.26061	1.25943	1.23088	1.26232	1.24533	1.25223	1.25219
141	sfsA	-0.190029	0.96642	0.909869	0.726002	0.723629	0.926189	0.92564	0.924532	0.923691	0.923973	0.901867	0.865123	0.911434	0.92564	0.398936	0.268221	0.504732	0.926734	0.925915	0.924532	0.922556	0	0	0	0.794894	0.819208	0.737689	0.395789	0.20364	0.925365	0.885686	0.755929	0.751943	0.759156	0.917814	0.881604	0.773767	0.921405	0.757705	0.757412	0.863045	0.925915	0.921695	0.923409	0.48968
142	ligT	0	0.0742311	0	0.0506487	0	0.0748379	0.0672927	0.0520491	0.0404797	0.0443494	0	0	0.0880736	0.0672927	0.489338	0.405446	0.166328	0.082333	0.0710716	0.0520491	0.0248669	0.997691	1.22889	1.2272	0	0.15718	0	0	0.0794572	0.063501	0	0.151535	0.0967049	0.195934	0	0	0	0.00903501	0.175969	0.171933	0	0.0710716	0.0130139	0.0365967	0.322711
143	hrpB	-0.261086	2.89622	2.90949	2.66273	2.66706	2.94453	2.94242	2.93817	2.93494	2.93602	2.89907	2.85124	2.69871	2.94242	2.33463	1.78598	1.79414	2.94662	2.94348	2.93817	2.93059	1.83725	1.47455	1.46421	2.58496	2.73665	2.68536	2.05733	1.47927	2.94136	2.87801	2.73704	2.72175	2.74943	2.91983	2.8727	2.64853	2.92617	2.74386	2.74273	2.84854	2.94348	2.92728	2.93386	2.42203
144	mrcB	0.152886	0.261046	0.200078	0.0039689	-0.0423463	0.309955	0.300305	0.280809	0.266012	0.270961	0.189661	0.141833	1.07737	0.300305	0.11456	0.482016	0.836024	0.319542	0.305138	0.280809	0.246044	0.125531	-0.0059739	-0.0179964	-0.124447	0.184425	-0.0240455	0.932886	0.434284	0.295456	0.1686	0.179169	0.109043	0.235955	0.21042	0.163286	0.939118	0.225795	3.21042	0.205258	1.13913	0.305138	0.230884	0.261046	1.03533
145	fhuA	0.0797337	-0.499919	-0.560887	-0.756996	-0.469977	-0.451009	-0.127326	-0.480155	-0.494952	-0.490003	-0.571303	-0.619132	-0.68359	-0.460659	-0.646405	-1.25176	-1.48817	-0.441423	-0.455826	-0.480155	-0.514921	-0.3021	1.10463	1.06223	-0.357091	-0.57654	-0.78501	-1.41304	-0.804334	-0.465509	-0.592365	-0.248462	-0.123601	-0.52501	-0.550545	-0.0693578	-0.15518	-0.535169	-0.550545	-0.222373	-0.0935151	-0.455826	-0.530081	-0.499919	-0.725631
146	fhuC	-0.100242	0	0	0	0	0	0	0	0	0	0	0.336925	0	0	0	-0.0815757	-0.0652082	0	0	0	0	0.0711698	0	0	0.196526	0	0	0	0.0825257	0	0	0	0	0	0	0	0	0	0	0	0	0	0	0	0
147	fhuD	-0.246631	0.475574	0.617479	0.465311	0.567585	0.59266	0.48978	0.540388	0.48002	0.451258	0.538704	0.247441	0.546737	0.510722	0.391547	0.249168	0.0325429	0.527944	0.56217	0.493268	0.462143	0.982048	0.630951	0.548458	0.802869	0.646699	0.463944	0.160026	0.900894	0.553501	0.406735	0.496511	0.433728	0.527794	0.477369	0.393286	0.445884	1.44574	0.646294	0.596086	0.657152	0.515049	0.542811	0.475574	0.297895
148	fhuB	-0.00687118	0.450865	0.326828	0.531682	0.616019	0.558847	0.594921	0.441822	0.453855	0.647694	0.573644	0.544155	0.235565	0.474503	0.341724	0	0.369446	0.486085	0.45647	0.462764	0.441832	0.0902501	1.23443	0.573528	0.400121	0.298188	0.170942	0.491533	0.657074	0.45064	0.56512	0.359682	0.31746	0.402565	0.399441	0.611899	0.605457	0	0.324363	0.517623	0.248246	0.477413	0.39082	0.450865	0.924672
149	hemL	-0.0810684	0.305548	0.0445798	-0.151529	-0.197844	0.154457	0.144807	0.325311	0.110514	0.115463	0.0341632	-0.0136653	0.121877	0.344807	0.276054	-0.156489	-0.387444	0.164044	0.14964	0.125311	0.290546	0.170033	1.55999	1.33122	0.437047	0.0289266	0.581928	-0.0905822	-0.389184	0.139958	0.0131016	0.0236709	0.153545	0.280457	0.0549218	0.00778781	0.18362	0.270297	0.0549218	0.0497601	-0.0163695	0.14964	0.0753859	0.105548	-0.120165
150	clcA	0	0.0909478	0.181162	0	0	0.119264	0.132981	0.10239	0.093823	0.101561	0.0458934	0.193221	0.430833	0.106155	0	0.528914	0.174892	0.289811	0.116475	0.10239	0.222613	0	0	0	1.03464	0.186939	0	0.0379871	0	0.286308	0.647975	0.191436	0.00419444	0	0.477071	0.174701	0.203105	0.0705394	0.447603	1.00736	0.242815	0.101891	0.0608216	0.0752257	0.182723
151	erpA	-0.477172	1.23947	0.706546	1.2422	1.12093	1.28066	1.14223	1.25612	1.24366	1.21493	0.954514	1.28365	1.05402	1.00174	1.16591	0.720005	0.441593	0	1.2766	1.25612	1.27947	1.2003	1.43293	0.821333	1.15251	1.22758	0.702574	0.575792	0.389544	1.58424	0.844205	0.104228	1.10304	1.38327	1.22763	1.20978	0.790884	1.20979	1.09158	1.10522	1.22023	0.751563	0.758171	0.673481	1.13282
152	yadS	-0.097941	0	0	0	0.0239469	0	0.13754	0	0	0.034719	0.348449	0	0	0	0.105571	0	-0.0631585	1.43811	0	0	0	0	0	0.180293	0	0	0	0	0	0	0	0.264207	0.00889528	0	0	0	0	0	0	0.0921286	0	0	0	0	0
153	btuF	0	0	0.845846	0	0	0	0	0	0	0	0	0.0617554	0	0.428754	0	0.031894	0	0	0	0	0	0	0.113228	0	0	0	0.434678	-0.0364895	-0.0454977	0	0.874201	1.39157	0	0	0	0	0.663111	0	0	0	0	0.831317	0.721848	0.896156	0
154	mtn	0	0	0	0	0	0	0	0	0	0	0	0.024281	0	0	0	0	0	0.483632	0	0	0	0.106544	0	0	0.299665	0	0	0	-0.0722517	0	0	0.451277	0	0	0	0	0	0	0	0	0	0	0	0	0
155	dgt	0.338298	2.10722	4.55634	1.7821	1.5445	1.79608	1.90914	2.01363	1.86116	1.88243	1.96614	1.73087	1.68884	3.28095	1.72603	1.25483	1.35182	1.6791	1.91324	1.89227	1.8442	2.7657	2.90444	1.76014	2.155	1.60033	2.71288	1.35539	0.781868	1.90502	3.81586	3.44959	1.69014	1.84742	1.80292	2.03891	3.37121	1.99682	2.0831	1.81672	1.90437	4.28611	3.88495	4.49241	1.79737
156	degP	-0.0116857	0.176734	0	0	0.147743	0.752021	0.0157793	0.271892	0.0979289	0	0.00991301	0	0	0	0	-0.25705	0.0642299	0.0605762	0.0201565	0	0.0798443	0	0	0	0	1.17335	0.526782	0.624021	0.0735157	0.0113874	0	0	0.182183	0	0.113803	0	0	0.042638	0.0176762	0	0.0773551	0	0	0	0.0965592
157	cdaR	0	0	1.62043	0	0	0	0	0	0	0	0	0	0	0	0	-0.0557201	-0.071261	0	0	0	0	0	0	0.391334	0	0	0	0	0.0522271	0	0	0	0	0	0	0	0	0	0	0	0	0	0	0	0
158	yaeH	-0.109956	0.82103	0	0.603575	0.773412	0.793337	0.852613	0.836929	0.713713	0.761967	0.73567	0.803448	0.917547	0.785574	0.781453	0.360447	0.385351	0.773116	0.789462	0.769889	0.713989	0.490636	0.64016	2.10021	0.955097	0.692351	0.720283	0.46674	0.248099	0.804439	0.824981	0.844548	0.772744	0.982894	0.68533	0.753558	0.484676	0.854653	0.713263	0.868959	0.784933	0.789462	0.729726	0.82103	0.756878
159	yaeI	-0.204094	0	0	0	0	0	0	0	0	0	0	0	0	0	0.0404978	0	0	0	0	0	0	0.127051	0	0	0	0	0	0	0.23604	0	0	0	0	0	0	0	0	0	0	0	0	0	0	0	0
160	dapD	-0.323235	0.035647	0.480486	0.417923	0	0.0960953	0.0617468	0.0487857	0.217409	0.0701718	0.0831622	0.0070929	0	0.0896798	0.00735798	0.334307	0	0.19744	0.0928929	0.0767186	0.148578	0.494954	0.142736	0	0.45351	0.0126418	0.125867	0	0	0.20905	0.0248877	0.277304	0	0	0.124896	0.132667	0.284693	0.118467	0.0299235	0	0.0608502	0.0928929	0.0435281	0.035647	0.00333059
161	glnD	0.291816	0.113818	0.0528498	0.252981	-0.189574	0.162727	0.403077	0.133581	0.118784	0.123733	0.0424332	-0.00539537	1.51063	0.153077	0.363572	-0.165212	-0.249926	0.172313	0.15791	0.133581	0.0988156	1.91367	1.78385	2.55772	2.97824	0.0371965	-0.171274	0.596936	-0.00542573	0.148228	0.0213715	0.0319408	0.211815	0.0887268	0.0631917	0.0160577	0.43813	0.0785669	0.0631917	0.05803	-0.00809958	0.15791	0.0836558	0.113818	-0.111895
162	map	0.109868	0.396852	0.335884	0.139775	0.0934602	0.445762	0.436112	0.416616	0.401819	0.406768	0.325468	0.277639	0.713181	0.436112	0.250366	0.117823	-0.613132	0.455348	0.440945	0.416616	0.38185	0.261337	0.129833	0.11781	0.0113591	0.320231	0.111761	0.276211	-0.514872	0.431262	0.304406	0.314975	0.244849	0.371761	0.346226	0.799092	0.0749242	0.361601	1.93119	0.341065	0.274935	0.440945	1.15917	0.396852	0.17114
163	tff	-0.0251279	1.19271	1.53243	1.46713	0.856025	1.20668	1.20393	1.19836	1.19413	1.55268	1.17231	0.908648	1.18767	1.20393	1.15086	0.958682	0.747933	1.20942	1.20531	1.19836	1.20754	1.51113	0.847916	0.862982	1.08257	1.17082	1.11125	1.06095	1.72083	1.20254	1.53044	1.16932	1.14928	0.789299	1.23884	1.16478	0.525917	1.18264	1.17824	1.17677	1.15788	1.20531	1.18409	1.19271	1.12822
164	rpsB	0.0343725	0.205867	0.125728	0	0.412525	0.212854	0.211475	0.20869	0.206576	0.135855	0.195669	0.438836	0	0.211475	0.18494	0	0	0.214223	0.212166	0.20869	0	0.115079	0	0.416003	0.150796	0.194921	0.165139	0	0.102109	0.210782	0	0.19417	0.184152	0.598523	0	0.191901	0.591832	0.200831	0.198634	0.197897	0.18845	0.212166	0.201558	0.205867	0.173622
165	tsf	0	0.613838	0.588468	0.550028	0.333842	0.650798	0.643506	0.655295	0.617591	0.642035	0.632357	0.574474	0.838905	0.643506	0.503139	0.278368	0.250437	0.658042	0.647158	0.628773	0.871474	0.633583	1.26204	0.352243	0.293537	0.367766	0.352455	0.459164	0	0.639841	0.786743	0.551964	0.613822	0.51448	0.90583	0.612425	0.442924	0.702051	0.648044	0.571679	0.545766	0.647158	0.591044	0.613838	0.443268
166	pyrH	-0.424054	0.747803	0.836882	0.898541	0.787694	0.757726	0.755768	0.698767	0.74881	0.851264	0.588391	0.622165	0.379382	0.755768	0.718081	0.401333	0.396578	0.759671	0.756749	0.751813	0.760624	0.618858	0.30232	0.792635	0.727558	1.1086	0.78184	0.330647	0.859544	0.754784	0.729045	0.73119	0.487257	0.903505	0.491154	0.58304	0.966324	0.510946	0.592603	0.736483	0.674945	0.756749	0.741683	0.747803	0.702006
167	frr	-0.66418	0.865317	0.740721	0.50057	0.533431	0.907138	0.898887	1.28939	0.869564	0.801332	1.05065	0.835845	1.17123	0.898887	0.740061	0.61948	0.391922	0.915335	0.903019	0.882216	0.984014	0.821906	1.20221	0.554252	0.637142	1.45839	0.782337	0.678734	0.562624	0.89474	0.786269	0.795306	1.12584	0.72901	1.14087	1.0281	0.983006	1.22567	1.0684	0.817615	1.67686	0.903019	0.839526	0.865317	0.672316
168	dxr	0.266543	-0.00202995	-0.062998	-0.259107	0.289772	0	0	0	0	0	-0.0734146	-0.121243	0	0	-0.148516	0	-0.219533	0	0	0	-0.0170321	-0.137545	-0.26905	-0.281072	-0.387523	-0.0786512	-0.287121	-0.915153	-0.913755	0.273681	-0.0944762	-0.083907	0	-0.0271209	0	-0.09979	0	-0.0372808	-0.052656	-0.0578177	0	0	-0.0321919	-0.00202995	-0.227743
169	ispU	0	1.10705	1.04608	0.983693	1.13154	1.15596	1.28916	1.12681	1.11201	1.11696	1.32138	1.13069	1.20909	1.14631	1.18698	0.983013	0.389547	1.16554	1.15114	1.12681	1.09205	1.25725	2.23358	0.185533	0.947978	1.03043	1.08454	0.336782	0	1.10236	1.15746	1.16803	1.0979	1.08196	1.19928	1.00929	1.23797	1.0718	1.05642	1.05126	1.12799	1.15114	1.21974	1.10705	0.881335
170	cdsA	0.111183	0	0	0.0127887	0	0	0	0	0	0	0	0	0	0	0	0	0.190523	0	0	0	0	0	0	1.09946	0	0	0.0323878	0	-0.252795	0	0	0	0	0	0	0	0	0	0	0	0	0	0	0	0
171	rseP	-0.0372107	0.502531	0.532473	0.334038	0.290048	0.551441	0.541791	0.522295	0.507498	0.512447	0.522056	0.474227	0.40977	0.541791	0.628773	0.0871382	0	0.561027	0.546624	0.666382	0.487529	0.367017	0.326421	1.19425	0.117038	0.42591	0.575188	0.188042	0.250342	0.627851	0.500994	0.511564	0.729612	0.621528	0.633724	0.639768	0.362422	0.55819	0.633724	0.446744	0.471523	0.637533	0.47237	0.502531	0.458637
172	bamA	-0.03708	-1.09622	-1.15718	-1.35329	-1.39961	-1.04731	-1.05696	-1.07645	-1.09125	-1.0863	-1.1676	-1.21543	-1.27989	-1.05696	-1.2427	-0.875245	-2.1062	-1.03772	-1.05212	-1.07645	-1.11122	-1.23173	-1.36324	-1.37526	-0.481709	-1.17284	-1.38131	-1.00934	-0.186012	-0.0618053	-1.18866	-1.17809	-1.24822	-1.12131	-1.14684	-1.19398	-1.41814	-1.13147	-1.14684	-0.152003	-1.21813	-1.05212	-1.12638	-1.09622	-1.32193
173	skp	0	0.222249	0.161281	0.278976	0	0.271159	0.261509	0.555816	0.227216	0.232165	0.650865	0.103036	0.352382	0.261509	0.389567	0	0	0.280745	0.266342	0.555816	0.207247	0.0867345	0	0.257011	0	0.145628	0.729639	0	-0.0652429	0.25666	0.629803	0.140372	0.0702464	0.197159	0.171623	0.624489	0.214125	0.186999	0.171623	0.166462	0.100332	0.266342	0.192088	0.222249	0
174	lpxD	0	0	0	0.372393	0	0	0	0.372393	0	0	0	0	0.957356	0	1.37239	0.129416	0	0	0	0.372393	0	0	0	0.372393	0	0	0	0	0	0	0	0	0	0	0	0	0.957356	0	0	0	0	0	0	0	0
175	fabZ	-2.44395	3.3727	3.3727	2.6865	3.29155	3.3727	3.3727	2.6865	3.3727	3.3727	2.8727	3.3727	2.10154	3.3727	1.6865	2.6865	2.58496	3.3727	3.3727	2.6865	3.3727	3.3727	3.32793	2.6865	4.20945	3.3727	2.58022	2.68182	2.18322	3.3727	2.8727	3.3727	3.3727	3.3727	3.3727	2.8727	2.10154	3.3727	3.3727	3.3727	3.3727	3.3727	3.3727	3.3727	3.36923
176	lpxA	0.0486364	0.57183	0.496768	0.704802	0.70239	0.614218	0.605854	0.588958	0.576134	0.555044	0.654407	0.43979	0.368204	0.605854	0.585216	0	0.157159	0.622526	0.610043	0.588958	0.558828	0.454383	0.451524	0.312382	0.121002	0.468514	0	0.0495681	-0.368607	0.601652	0.480598	0.50087	0.379861	0.516751	0.47701	0.475993	0.346272	0.416488	0.663076	0.52348	0.447966	0.610043	0.523467	0.704196	0.512859
177	lpxB	0	0	0	0	0	0	0	0	0	0.0377681	0	0	0	0	0.010863	0.317923	-0.0336792	0	0	0	0	0	0	-0.0175497	0.127532	0	0.864966	0.0872411	0	0	0	0	0.0712034	0	0	0	-0.0604355	0	0.0246769	0	0.0187703	0	0	0.0319724	0
178	rnhB	0.400022	0.167194	0.265846	0.0218086	0.129525	0.212843	0.203836	0.18564	0.171829	0.240798	0.0894572	0.256981	0.306879	0.203836	0.0155001	0.186205	-0.279314	0.22179	0.208347	0.18564	0.153192	0.0407134	0.140198	0.0300294	0.241939	0.354053	0.425977	0.169444	-0.54686	0.19931	0.158689	0.0907755	0.233341	0.377109	0.476551	0.153729	0.492603	1.00783	0.100058	0.115125	0.124508	0.208347	0.294598	0.144715	-0.0145319
179	dnaE	0	0	0	0	0	0	0	0	0	0	0	0	0	0	0	0	0	0	0	0	0	0	0	0	0	0	0	0	0	0	0	0	0	0	0	0	0	0	0	0	0	0	0	0	0
180	accA	-0.336403	0.605504	0.707851	0.841606	0.559447	0.648028	0.63481	0.766678	0.602434	0.606863	0.534939	0.538709	0.436172	0.634565	0.459188	0.416868	-0.175064	0.607924	0.639127	0.61616	0.58008	0.46684	0.345318	0.329112	0.205614	0.537725	0.711412	-0.0782025	-0.207524	0.629987	0.520602	0.618415	0.383714	0.573878	0.558056	0.665443	0.258075	0.659832	0.501651	0.586016	0.620525	0.639127	0.570306	0.748021	0.387489
181	ldcC	0.0378029	0.605916	0.462709	0.323588	0.389527	0.650609	0.67559	0.616036	0.662168	0.665804	0.600174	1.23899	0.50554	0.677304	0.604723	0.05812	0	0.998441	0.679198	0.669664	0.678864	0.627956	0.558077	0.587359	0.706688	0.544015	0.453877	0.649466	0.106395	0.675404	0.553105	0.942394	1.09442	0.65166	0.583665	0.50202	0.784418	0.978864	0.978502	0.351813	0.647347	0.679198	0.641164	0.608291	0.55203
182	yaeR	-0.04797	0.505067	0.649435	0.344718	0.290113	0.47519	0.384516	0.372821	0.354277	0.353787	0.378701	0.315009	0.424512	0.379618	0.215501	0	0.120275	0.500557	0.383873	0.362456	0.266637	0.171065	0.107708	0	0.44616	0.528683	0	0.562479	0.373958	0.375349	0.471061	0.23709	0.390304	0.324186	0.467388	0.463534	0.351203	0.226142	0.339283	1.1195	0	0.383873	0.344033	0.355424	0.207599
183	tilS	-0.426907	0.687661	0.514894	0.531437	0.566729	0.370471	0.753477	0.756453	0.757394	0.765979	0.852406	0.679913	0.851467	0.762711	0.784541	0.539544	0.443226	0.708945	0.762173	0.764882	0.928734	1.23055	0.690035	0.967585	0.469993	0.65451	1.07236	0.623261	0.558452	0.763251	0.73864	0.740163	0.638366	0.767588	0.680315	0.792749	0.738394	0.907059	0.881076	1.03684	2.19367	0.762173	1.05566	0.758654	0.957708
184	rof	0	0.59692	0	0.654522	0.549024	1.05166	0.687999	0.632399	0.657944	0.58316	0.589089	0.634273	0.453817	0.598979	0.487795	0.636261	0.0150278	0.621767	0.601584	0.588469	0.569682	0.558814	0.76077	1.13699	1.61689	0.520746	0.351593	0.384645	0	0.596365	0.694661	0.562814	0.588564	0.586359	0.618054	0.601116	0.587091	0.595591	0.562896	0.775705	0.518533	0.601584	0.58509	0.621746	0.49513
185	yaeP	0	0.0804269	0.696162	0	0	0.16285	0.000700835	0.0445195	0	0.0889027	0.0396087	0	0.00755339	0.0994902	0.0447383	0	0	0.103247	0.101234	0.0924559	0.0989154	0.0557094	0	0	0	0.101014	0	0	0.0587286	0.0977405	0	0.109347	0.0352042	0.0517809	0	0	0	0	0.0828782	0.0318554	0.069307	0.101234	0	0.0373888	0
186	yaeQ	0	0	0	0	0	0	0	0	0	0	0	0	0	0	0	0	-0.079802	0	0	0	0	0	0	0	0	0	0.188753	0	0.0681875	0	0	0	0	0	0	0	0	0	0	0	0	0	0	0	0
187	arfB	0	0	0	0	0	0	0	0	0	0	0	0	0	0	0	0	0	0	0	0	0	0	0	0	0	0	0	0	-0.0262736	0	0	0	0	0	0	0	0	0	0	0	0	0	0	0	0
188	nlpE	-0.30821	0.110797	0.366206	0	0.120051	0.0772838	0.229783	0.166468	0.206814	0.112237	0.0802311	0.11608	0	0.130994	0	0	0.217922	0.146473	0.134083	0.118532	0.0773068	0	0	0	0	0.013589	0	0.268369	0	0.127894	0.122268	0	0.00401712	0.114352	0.217337	0.196606	0	0.573806	0.0577201	0.103581	0	0.134083	0.268088	0.153836	0.0289287
189	yaeF	0	0.275063	0.293088	0.360435	0.0912567	0.337934	0.250071	0.368117	0.230023	0.28355	0.155446	0.161339	0.402747	0.301169	0.299437	0.382088	-0.0210642	0.311072	0.304071	0.289463	0.278418	0.206203	0.394112	0.443432	0	0.357455	0.268089	-0.0827997	0.0580118	0.298257	0.183059	0.627	0.188774	0.517274	0.27627	0.303623	0.0671288	1.20052	0.255382	0.226855	0.218863	0.304071	0.329586	0.35625	0.107263
190	proS	0.295402	0.984453	0.911469	0.670462	0.803599	0.991449	1.04037	0.942181	1.01945	0.988711	1.32615	0.941056	1.04899	1.00631	0.821718	0.134074	0.686166	1.01894	1.00921	0.994617	0.967214	0.894845	0.638067	0.593165	0.782336	0.852904	0.704011	0.254706	-0.243896	1.0034	0.953343	0.667952	0.889976	0.797889	0.933023	0.867653	1.13448	0.332232	0.946948	0.960804	0.900003	1.00921	0.917943	0.930329	0.870608
191	tsaA	0	3.28732	0.483714	0.303812	0.0107234	0.516672	0.509959	0.496397	0.529581	0.489546	0.432989	0.951009	0.702703	0.509959	0.380745	0.560917	0.816991	0.523341	0.513321	0.496397	0.472212	0.0840292	0.340374	0.33201	0	0.983907	0.396714	0	0	0.506586	0.766164	0.42569	0.376907	0.508672	0.534387	0.414641	0.302177	0.458126	0.44743	0.995131	0.745662	0.513321	0.461666	0.830474	0.412587
192	rcsF	-0.28267	0	1.58166	1.41797	1.87811	1.5377	1.53393	1.5263	1.60747	1.52245	1.49063	0.989537	1.14235	1.53393	1.46124	0.869171	0.612272	1.54146	1.53582	1.5263	1.5127	1.85684	1.50104	1.49633	1.68039	1.5977	1.63179	2.01954	1.02916	1.53203	1.17804	1.48653	1.45909	1.5957	1.67267	1.48031	1.47955	1.50477	1.49876	1.01436	1.16651	1.53582	1.50676	1.21422	1.60416
193	metQ	-0.38378	0	0	0	0	0	0	0	0	0	0	0	0	0	0	0	0	0	0	0	0	0	0	0	0	0	0	0.117846	0	0	0	0	0	0	0	0	0	0	0	0	0	0	0	0	0
194	metI	0	0	0	0	0	0	0	0	0	0	0	0	-0.131825	0	0	-0.205142	-0.0767205	0	0	0	0	0	0	0	-0.19079	0	-0.0903884	0	0	0	-0.0406005	0	-0.100157	0	0	-0.0459143	0	0	0	-0.00394203	-0.0700716	0	0	0	0
195	metN	-0.187095	0.352063	0.291095	0.241227	0.0486713	0.150973	1.14132	0.121827	0.35703	0.111979	1.09266	0.23285	0	0.141323	-0.0444227	-0.0231095	0.48832	0.160559	0.146156	0.121827	0.0870612	0.216548	-0.164956	1.68376	0	0.0254421	0.0669721	0.188941	-0.51718	0.136473	0.00961716	0.270186	0	0.0769724	0.301437	0.00430336	0.530135	0.0668126	0.0514373	0.0462756	0	0.146156	0.0719014	0.102063	0.376351
196	gmhB	0	0	0	0	0	0	0	0	0	0	0	0	0	0	0	0	0	0	0	0	0	0	0	0	0	0	0	0	0	0	0	0	0	0	0	0	0	0	0	0	0	0	0	0	0
197	rrsH	0	0	0	0	0	0	0	0	0	0	0	0	0	0	0	0	0	0	0	0	0	0	0	0	0	0	0	0	0	0	0	0	0	0	0	0	0	0	0	0	0	0	0	0	0
198	ileV	0	0	0	0	0	0	0	0	0	0	0	0	0	0	0	0	0	0	0	0	0	0	0	0	0	0	0	0	0	0	0	0	0	0	0	0	0	0	0	0	0	0	0	0	0
199	alaV	0	0	0	0	0	0	0	0	0	0	0	0	0	0	0	0	0	0	0	0	0	0	0	0	0	0	0	0	0	0	0	0	0	0	0	0	0	0	0	0	0	0	0	0	0
200	rrlH	0	0	0	0	0	0	0	0	0	0	0	0	0	0	0	0	0	0	0	0	0	0	0	0	0	0	0	0	0	0	0	0	0	0	0	0	0	0	0	0	0	0	0	0	0
201	rrfH	0.247928	0.672114	0.611146	0.415037	1.95368	0.721024	0.711374	0.691878	0.677081	0.68203	0.60073	0.552901	0.488443	0.711374	0.525628	0.893085	-0.33787	0.73061	0.716207	0.691878	2.24207	0.536599	0.405095	0.393072	1.28662	0.595493	0.387023	-0.241008	0.26039	0.706524	0.579668	1.59024	0.520111	0.647023	0.621488	0.574354	0.350186	0.636864	0.621488	0.616327	0.550197	0.716207	0.641952	0.672114	0.446402
202	aspU	0	0	0	0	0	0	0	0	0	0	0	0	0	0	0	0	0	0	0	0	0	0	0	0	0	0	0	0	0	0	0	0	0	0	0	0	0	0	0	0	0	0	0	0	0
203	dkgB	0.506406	0	0.200078	0	-0.0423463	0	0	0	0	0	0.729826	0	0	0	0	0.063159	0.251062	0	0	0	0	0	-0.0059739	-0.0179964	-0.124447	0	-0.0240455	-0.652077	-0.150679	0	0	0	0	0	0	0	-0.0608822	0	0	0	0	0	0	0	0
204	yafC	0.00114543	0.463677	0	0.4566	0.556525	0.512586	0.502936	0.410278	0.468643	0.473592	0.459836	0.344463	0.280006	0.502936	0.317191	0.418857	0	0.522172	0.507769	0.48344	0.448674	0.328162	1.96712	0.184634	0.0781834	0.387055	0	0	0	0.498087	0.37123	0.77804	0.311674	0.438586	0.413051	0.615917	0.141749	0.428426	0.413051	0.407889	0.173354	0.507769	0.433515	0.463677	0.737964
205	yafD	0.154125	0	1.63634	-0.00201915	0	0	0	0.0975498	0	-0.0221791	-0.0193228	-0.0419784	-0.0725111	0	-0.0548972	0	-0.614852	0	0	0	0	0	0	-0.0254226	-0.168111	-0.108716	0.289661	-0.150007	-0.33021	0	-0.0292993	0	0	0	-0.00948979	0	0	-0.00220679	-0.0827206	-0.0119348	0.22454	0	0	0	0
206	yafE	0.109677	-0.0571692	0.684847	-0.202013	0	-0.0082596	0	0	-0.052203	0	-0.117819	-0.153061	-0.200556	-0.0179098	-0.173157	-0.280643	-0.281124	0	0	-0.0374059	0	-0.0815731	0.00809006	0	-0.349267	0	-0.342261	-0.596302	-0.377674	-0.0227592	-0.133338	0	-0.0980612	-0.0822602	-0.102523	-0.0438181	-0.379097	-0.0911941	0	-0.106327	0	-0.0130766	-0.0873312	-0.0571692	-0.0606598
207	mltD	0.402703	0.277474	0	0	0.132962	0.322346	0.602228	0.295606	0.282031	0.286571	0.275705	0.063315	0.304298	0.313492	0.475774	0	0.815024	0.33114	0.317926	0.295606	0.112658	0.486745	0.028717	0	0	0.772062	0.0159228	0	0	0.309043	0.192661	0.540383	0.110499	0.104163	0.40534	0.253494	0	0.245134	0.231029	0.226293	0.165624	0.317926	0.249803	0.125292	0.336454
208	gloB	0.0173521	0	0	0.329817	0.433781	0	0	0	0	0	0.308731	0	0.175	0	0	0	0.111882	0	0	0	0.244123	0	0	1.55751	1.54079	0	0	-0.0309124	0	0	0	0	0	0.230317	0	0.299014	0.264966	0	0	0	0	0	0	0.264653	0
209	yafS	0	0.137832	0.121489	0	0	0.147255	0	0.14164	0.138789	0.139743	0	0.359374	0	0.145396	0	0.0953048	0	0.149102	0.146327	0.14164	0.243275	0	0.0871303	0.507315	0	0	0.0829064	0	0.168554	0.144462	0.120022	0	0.172767	0.253364	0.0546841	0	0	0.131041	0.128079	0.127084	0.114344	0.146327	0.132021	0.228273	0.140218
210	rnhA	0.856396	0.447901	0.417857	1.29977	1.87198	0.473478	0.52659	0.458236	0.450498	0.453086	1.2602	1.04923	1.50982	0.468431	0.815142	0.197494	1.78146	0.47849	0.470959	0.458236	0.396723	0.421725	0.30797	0.132682	0	0.457061	0.298817	1.15516	0.388577	0.465895	0.399558	0.453908	0.542725	0.386634	0.650785	1.04438	0.509877	0.429467	0.421427	0.418728	0.384146	0.470959	0.432128	0.411725	0.311519
211	dnaQ	0	2.00663	1.97659	1.27353	0.845745	2.03221	2.08532	2.01697	2.00923	2.01182	1.81893	2.60796	2.06855	2.02716	2.37387	1.75623	0.532832	2.03722	2.02969	2.01697	1.95545	1.98046	1.8667	1.69141	4.66689	2.01579	1.85755	0.713891	0.947308	2.02463	1.95829	2.01264	2.10146	1.94536	2.20952	1.60311	2.06861	1.9882	1.98016	1.97746	1.94288	2.02969	1.99086	1.97046	1.87025
212	aspV	0	0	0	0	0	0	0	0	0	0	0	0	0	0	0	0	0	0	0	0	0	0	0	0	0	0	0	0	0	0	0	0	0	0	0	0	0	0	0	0	0	0	0	0	0
213	yafT	0	0.996261	0.935293	0.739184	1.0262	1.04517	1.03552	1.01602	1.00123	1.00618	1.25821	0.877048	0.81259	1.03552	1.18311	0.745552	0.31961	1.05476	1.04035	1.01602	0.981259	0.860746	0.729241	0.717219	0.610768	0.91964	0.71117	0.749805	0.224552	1.03067	0.903815	0.914384	0.844258	0.97117	0.945635	0.898501	0.343391	0.96101	1.27897	2.24277	0.874344	1.37369	1.49442	0.996261	0.770548
214	ykfM	0	0	0	0	0	0	0	0	0	0	0	0	0	0	0	0	0	0	0	0	0	0	0	0	0	0	0	0	0	0	0	0	0	0	0	0	-0.455353	0	0	0	0	0	0	0	0
215	yafU	-0.321553	-1.43075	-1.17108	-0.918757	-0.754566	-1.46517	-1.34274	-1.41098	-1.50911	-1.3375	-1.05474	-1.11913	-1.36442	-1.04399	-1.27849	-0.461838	-0.274796	-1.45559	-1.46999	-1.49432	-1.19575	-1.19194	-0.756167	-1.32771	-1.46875	-1.40718	-1.02048	-0.76243	-0.826115	-1.47967	-1.35653	-1.34217	-1.39852	-1.19025	-1.26596	-0.979761	0	-1.38267	-1.38658	-0.540716	-1.33725	-1.30332	-0.553475	-0.854708	-0.434646
216	yafF	0	0	0	0	0	0	0	0	0	0	0	0	0	0	0	0	0	0	0	0	0	0	0	0	0	0	0	0	0	0	0	0	0	0	0	0	0	0	0	0	0	0	0	0	0
217	yafV	0	0	0	0	0	0	0	0	0	0	0	0	0	0	0	0	0	0	0	0	0	0	0	0	0	0	0	0	0.0266508	0	0	0	0	0	0	0	0.664276	0	0	0	0	0	0	0	0
218	ivy	-0.00415563	0	-0.0309166	0.0231181	0.0889253	0	0	0	0	0	-0.0662631	0	0	0	0	-0.0924389	-0.417548	0	0	0	0	0.473377	0.294943	0	0	-0.0674044	0	0	0.0256289	0	0	-0.0151639	-0.0702448	-0.0623604	0	0	-0.212445	0	-0.0458235	0	0	0	-0.132454	-0.109171	0.0533206
219	fadE	-0.178001	0.0753157	0.0143477	0.30668	-0.228076	0.124225	0.114575	0.0950789	0.0802819	0.0852312	1.00393	-0.0438975	-0.108355	0.114575	-0.0711704	-0.657494	0.226296	0.133811	0.119408	0.0950789	0.560314	-0.0601993	-0.191704	-0.203727	0.189822	0	-0.209776	0.747156	-0.175445	0.109726	-0.0171306	0.493439	-0.041565	0.0502247	0.0246896	-0.0224444	0.253388	0.0400648	0.0246896	0.0195279	-0.0466017	0.119408	0.0451537	0.0753157	0.322943
220	gmhA	-0.0711612	0.192413	0.151258	0	0.0415708	0.132594	0.132674	0.108111	0.087761	0.109023	0.0350978	0.00422779	0.261391	0.125469	0.142098	0.382361	0.19532	0.148172	0.135021	0.155369	0.0948459	0.0408786	0.0606466	0.0683936	-0.133205	0.143276	0.185449	0.204664	-0.0874446	0.224709	0.0875993	0.0758581	0	0.149336	0.0678377	0.0725387	-0.093551	0.265633	0.191414	0.209942	0	0.128875	0.124934	0.144566	0
221	yafJ	-0.0779395	0.135876	0.0878718	0.193284	0.163713	0.184972	0.141109	0.188469	0.0671424	0.13914	0.179878	0.134434	0	0.180736	0.0816349	0	0	0.142429	0.149948	0.261885	0.104984	0.19283	0.187322	0.228958	0.122619	0.0613345	0.279008	0	0	0.272762	0.129675	0.241814	0	0.288208	0.0932215	0.188597	0	0.0745348	0.187528	0.080903	0.49884	0.183751	0.204615	0.232368	0.208672
222	yafK	0	0	0	0	0	0	0	0	0	0	0	0	0	0	0.0307119	0	0.0805323	0	0	0	0	0	0	0	0	0	0.0133896	0.359709	0.3428	0.0419899	0	0	0.757157	0	0	0	0.233109	0	0	0	0	0	0	0	0
223	yafQ	0	0.326141	0.341367	0.222917	0.412018	0.385586	0.453931	0.344782	0.744858	0.422833	0.252682	0.278782	0.591551	0.381883	0.317682	0.3423	0.199098	0.474265	0.443572	0.317358	0.455487	0.259403	0.0851351	0.0392441	0.0382398	0.371118	0.153792	0.0572135	0	0.366238	0.425129	0.233732	0.772594	0.27853	0.434772	0.311719	0.468663	0.3051	0.509571	0.306981	0.146283	0.382114	0.362483	0.347669	0.254869
224	dinJ	0.166814	0	0	0	0	0	0	0	0	0	0	0	0	0	0	0	0	0	0	0	0	0	-0.0547069	0	-0.15542	0	0	0.236472	0	0	0	0	0	0	0	0	0	0	0	0	0	0	0	0	0
225	yafL	0.0647251	0	0	0	0.277705	0	0	0	0	0.00813929	0	0	0.0637892	0	0.313172	0	0	0	0.00364158	0	0.123753	0.0316906	0.0877707	0	0.0699333	0.12378	0	0	-0.506654	0	0.302199	0.0439165	0	0	0.117071	0.0847852	0	0	0	0	0	0	0	0	0.00843958
226	rayT	0	0.482261	0.532667	0.20349	0.239833	0.367758	0.372786	0.43926	0.244623	0.388283	0.843526	0.227375	0.263255	0.349263	0.263812	0.216987	0.221226	0.35396	0.428499	0.407181	0.299644	0.383077	0.182185	0.420665	0	0.142612	0.221379	0	0	0.349991	0.0398897	0.331063	0.0881487	0.326417	0.272796	0.204287	0.136043	0.48034	0.326308	0.385168	0.526953	0.365507	0.36841	0.539688	0.293859
227	lfhA	-0.637689	0.507245	0.310426	0.0998615	0.635725	0.420326	0.54937	0.580206	0.423114	0.323301	1.08073	0.461382	0.738018	0.3654	0.700814	0.372438	0.0476854	0.429769	0.402281	0.48213	0.396949	0.266789	0.572911	0.433252	0.506719	0.578899	0.192926	0.299521	0.151743	0.381887	0.378721	0.504408	0.419206	0.350275	0.347463	0.33474	0.423198	0.710329	0.314517	0.360244	0.683302	0.421626	0.269288	0.313344	0.656595
228	lafU	-0.246352	0.690176	0.640225	0.893405	0.51076	0.750111	0.42314	0.789702	0.723161	0.871833	1.00461	0.68895	0.535811	0.868084	0.709013	0.753815	0.246542	0.759645	0.740484	0.844946	0.700939	0.667827	0.642281	0.781111	0.975081	0.765621	0.598962	0.473064	0.654472	0.817815	0.735937	0.606549	0.803668	0.768456	0.751183	0.716563	0.894252	0.80201	0.792382	0.634403	0.493429	0.737339	0.917597	0.770993	0.663938
229	dinB	0.665932	0.22153	0	0	0.34278	0	1.68177	0	0	0	0	0.220045	0	0	0.263742	0.185695	0.376097	0	0	0	0	0	0	0	0	0	0	0	-0.175834	0	0	0	0	0	0	0	0	0	0	0.433191	1.22654	0.0373252	0	0	0.128553
230	yafN	0.0888522	-0.644467	-1.02829	-0.413358	-0.637009	-0.91802	0	-0.937963	-0.948087	-0.806473	-0.92138	-0.341217	-0.770137	-0.924623	-0.322276	0	0	-0.911461	-0.921316	-0.823927	-0.996837	-1.1519	-0.883408	-0.996457	-0.0272716	0	-0.510791	-0.939189	-0.277116	-0.813906	-0.908835	-0.849611	-1.04671	-0.831283	-0.74696	-0.463908	-0.621324	0	-0.907176	-0.540517	0	-0.693246	-0.744052	-0.79359	-0.0800287
231	yafO	0	0	0	0	0	0	-0.624674	0	0	0	0	0	0	0	0	0	0	0	0	0	0	0	0	0	0.0452563	0.4669	0	0	0	0	0	0	0	0	0	0	0	0.385777	0	0	0	0	0	0	0
232	yafP	-0.139262	0	0	0	-0.153262	0	0	0	0	0	0	0	0	0	0	0.148498	0	0	0	0	0	0	0	0	0.156754	0.474726	0	0	0	0	0	0	0	0	0	0	0	0.337782	0	-0.149146	-0.412151	0	0	0	0.0286531
233	ykfJ	0	-0.179803	-0.122673	-0.0653073	0	-0.123647	-0.175505	-0.146657	-0.158339	0	-0.165984	-0.193481	-0.324807	-0.131265	-0.149659	-0.252909	-0.707952	-0.116079	-0.12745	-0.181745	-0.086384	0	0	-0.101195	-0.190599	-0.332802	0	-0.0370838	-0.232571	-0.170181	0	-0.121636	-0.0541918	-0.0254925	-0.153896	-0.33312	0	-0.413352	-0.149596	-0.275663	-0.110951	-0.197625	-0.256247	-0.0569963	-0.201736
234	prfH	-0.165983	0	0	0	0	0	0	0	0	0	0	0	0	0	0	0	0	0	0	0	0	0	0	-0.00795305	0	0	-0.263574	0	0.0304027	0	0	0	0	0	0	0	0	0	0	0	0	0	0	0	0
235	pepD	-0.073306	0.717209	0.599786	0.601128	0.561283	0.759739	0.751348	0.736322	0.72271	1.23285	0.820807	0.637117	0.550837	0.751348	0.720265	0.106608	0.039725	0.768075	0.75555	0.734395	0.666701	0.729805	0.905308	0.689776	0.463617	0.567288	0.37963	0.277031	0	0.747131	0.636821	0.646012	1.00302	0.695391	0.670629	0.87178	1.12134	0.62311	0.677547	0.668698	0.813359	0.75555	0.690981	0.717209	0.661712
236	gpt	-0.098043	0	0.156551	0	0	0	0	0	0	0	0	0	0	0	0	0	-0.34987	0	0	0	0	0	0	0	0	0	0.0917069	-0.207211	-0.0228562	0	0	0	0.00722731	0	0	0	0	0	0	0	0	0	0	0	0
237	frsA	-0.233333	0.3275	0.253033	0.340527	0.29524	0.372156	0.363345	0.332054	0.323756	0.372381	0.102624	0.0536525	0.206408	0.363345	0.280708	0	0	0.380909	0.367758	0.345544	0.576045	0.290725	0.14167	0.151201	0.247438	0.36587	0.419793	0.0168912	0.0703237	0.358917	0.243092	0.252742	0.241134	0.30459	0.299178	0.146145	0	0.401659	0.250753	0.276563	0.385992	0.367758	0.29996	0.3275	0.107337
238	crl	-0.0991685	0	0	0	0.00739077	0	0	0.0332434	0.0203989	0.533675	0.357829	0.406608	0.385144	0	0	0	-0.021297	0	0	0	0	0	0	0	0	0	0	0	0.585411	0	0	0	0	0	0.205884	0.170344	0	0	0.0752168	0	0.31742	0	0	0	0
239	phoE	0	-0.267494	-0.301046	-0.167793	-0.0741078	-0.279849	-0.288622	-0.135891	-0.217524	0	0	0	0	-0.288622	-0.24523	-0.355706	-0.518134	-0.271134	-0.22741	-0.260891	-0.00840486	-0.265689	-0.256377	-0.162405	0.0996371	-0.24624	-0.498944	-0.311148	0	-0.179394	-0.317445	-0.398746	-0.185053	-0.290304	0	0	-0.381123	-0.254085	-0.132554	-0.290766	0	-0.295591	-0.260823	-0.153857	-0.247345
240	proB	-0.0562379	-0.919119	-0.873377	-0.83764	-0.644196	-0.867739	-0.875634	-0.925677	-0.824147	-0.962703	-0.644003	-0.791831	-0.639297	-0.875634	-0.437865	-0.118393	-0.747985	-0.859896	-0.883044	-0.800677	-0.885939	-0.654995	-0.629866	-1.01918	-0.429571	-0.799991	-0.740928	-0.59473	-0.344468	-0.902329	-0.801575	-0.974746	-0.529114	-0.939648	-0.923244	-0.770378	-0.501329	-0.857052	-0.796733	-0.711756	-0.936039	-0.769407	-0.750615	-0.941847	-0.631869
241	proA	0	0	0	0	0	0	0	0	0	0	0	0	0.395664	0	0	0	-0.105893	0	0	0	0	0	0	0	0	0	0	-0.444535	0.10438	0	0	0	0	0	0	0	0	0	0	0	0	0	0	0	0
242	thrW	-0.117037	0.789374	0.883472	0.946685	0.479222	0.836892	0.736872	0.943251	0.821982	0.72694	0.661228	0.762752	0.739149	0.831877	0.737623	0.248879	0.525572	0.841873	0.835548	0.706209	0.815275	0.646459	0.43831	0.492188	0.455451	0.21606	0.624163	0.126777	0.461025	0.890284	0.843251	0.65091	0.690371	0.758785	0.745516	0.798831	0.562332	0.650087	0.875946	0.810752	0.627634	0.832551	0.909394	0.798323	0.820828
243	ykfN	0	0	0	0	0.247283	0	0	0	0	0	0	0	0	0	0	0	0	0	0	0	0	0	0	0	0	0.0216751	0	0	0.330901	0.0604765	0	0	0	0	0	0	0.172742	0	0	0	0	0	0	0	0
244	ykfI	0	0	0	0	0	0	0	0	0	0	0	0	0	0	0	0	0	0	0	0	0	0	0	0	0	0.511043	0	0	0	0	0	0	0	0	0	0	0	0	0	0	0	0	0	0	0
245	yafW	0	0	0	0	0	0	0	0	0	0	0	0	0	0	0	-0.251157	0	0	0	0	0	0	0	0	0	0	0	-0.0257616	0	0	0	0	0	0	0	0	0	0	0	0	0	0	0	0	0
246	ykfH	-0.105041	0	0.110516	0	0	0.0458365	0.217803	0.0219046	0.298396	0.0938674	0.212749	0.247507	0.0218785	0.0402563	0	0	0	0.0513796	0.0425104	0.253168	0.00347372	0	0	0.0572941	0	0.334857	0	0	0	0.0515721	0	0.349459	0.0162751	0.0378483	0.0230827	0	0	0.0583957	0.0128232	0.00903123	0.0358622	0.0439078	0	0.00295913	0
247	ykfG	0	0	0	0	0	0	0	0	0	0.0714273	0	0	0	0	0	0	0	0	0	0	0	0	0	0	0	0	0	0	0	0	0	0	0	0	0	0	0	0	0	0	0	0	0	0	0
248	yafX	-0.0127471	0	0	0.186592	0	0.0219946	0	0.259498	0	0.0380015	0	0	0.00036162	0.0199238	0.14334	0	0	0.0240517	0.0220691	0	0.0193617	0.135053	0.0939318	0	0	0	0.174753	0	0	0	0	0.0542105	0.0720694	0.0847695	0.0792899	0	0	0.399527	0	0.116104	0.459832	0.0192045	0	0	0
249	ykfF	-0.124338	0	0	0	0	0	0	0	0	0	0	0	0	0	0	0	0	0	0	0	0	0	0	0	0	0	0	0	0	0	0	0	0	0	0	0	0	0	0	0	0	0	0	0	0
250	ykfB	-0.114782	0.733209	0.418814	0.28809	0.901519	0.558672	0.538606	0.270412	0.492298	0.594501	0.378772	0.320216	0.603957	0.556377	0.472857	0.33302	0.294784	0.560951	0.551134	0.488348	0.47955	0.500105	1.46557	0.652046	0.475361	0.347592	0.284307	0.273063	0.460689	0.534327	0.501596	0.359349	0.775246	0.477616	0.471544	0.697127	0.654186	0.27915	0.508752	0.58808	0.405073	0.567658	0.4823	0.679591	0.447379
251	yafY	-0.134122	0	0	0	0	0	0	0	0	0	0	0	0	0	0	0	0	0	0	0	0	0	0	0	0	0	0	0	0.368578	0	0	0	0	0	0	0	0	0	0	0	0	0	0	0	0
252	ykfL	0	0.393455	0.574591	0.514323	0.0421473	0.400514	0.396895	0.516128	0.356919	0.360594	0.64083	0.470927	0.508448	0.395147	0.280499	0.321842	0.427806	0.405846	0.406514	0.43884	0.451756	0.290438	0.352368	0	0.228986	0.604251	0.439067	0	0	0.406129	0.453895	0.39441	0.337471	0.365598	0.351395	0.293831	0.265256	0.466893	0.49353	0	0	0.384079	0.420338	0.414596	0.336081
253	ykfK	0	0	0	0	0.430211	0	0	0	0	0.0236872	0	0	0.242666	0	0	0	0	0	0	0	0	0	0	0	0	0	0	0.653314	0	0	0	0	0	0	0	0	0.03199	0	0	0.347653	0.311967	0	0	0	0
254	yafZ	0	0	0	0	0	0	0	0	0	0	0	0	0	0	0	0	0	0	0	0	0	0	0	0	0	0	0	0	0	0	0	0	0	0	0	0	0.0580293	0	0	0	0	0	0	0	0
255	ykfA	-0.289351	0.556372	0.326119	0.525139	0.40008	0.520975	0.513597	0.44117	0.577623	0.566122	0.421675	0.396699	0.430014	0.514391	0.431781	0.137021	0.221542	0.527515	0.669588	0.554222	0.424935	0.463496	1.04254	0.913739	0.351221	0.49183	0.179169	0.20375	0.335444	0.504865	0.351547	0.466391	0.344529	0.467651	0.45023	0.419335	0.544388	0.490029	0.541467	0.74632	0.49484	0.503357	0.515949	0.455853	0.702691
256	perR	0	0.0762192	0.190104	0	0	0.129852	0.122035	0.0947374	0.083733	0.0860386	0	0.137373	0.284825	0.122194	0.469324	0	-0.0523289	0.137459	0.099266	0.0887765	0.240073	0.14002	0.930006	0.748596	0.718583	0.239383	0	0.0938662	0.454104	0.117101	0.174504	0.175847	2.19004	0.070558	0.0502935	0.184569	0.0959851	0.0397858	0.0113981	0.0461248	0.478139	0.394871	0.0483139	0.256115	0.169016
257	insN	0	0	0	-0.0683931	-0.100235	0	0	-0.0030655	0	0	0	-0.0490817	0	0	0	0	0	0	0	-0.0030655	-0.0269667	-0.0785693	0	-0.127714	0.0223714	-0.0380799	-0.212653	-0.24535	0	0	-0.0177095	0	-0.121155	-0.0339028	-0.0202082	0	-0.175478	-0.0408877	-0.0202082	0.0679174	0	0	-0.0373891	0	0
258	insI1	0.274903	0	0	0	0	0	0	0	0	0	0	0	0	0	0	0	0	0	0	0	0	0	0	0	0.146381	0	0	0	0	0	0	0	0	0	0	0	0	0	0	0.165981	0	0	0	0	0
259	insN	0	-0.184298	-0.101179	-0.106472	-0.12384	-0.226298	-0.235948	-0.252657	-0.179332	-0.0834736	-0.111595	-0.205713	-0.186151	-0.235948	-0.330784	-0.546513	-0.672287	-0.216712	-0.140206	-0.252657	-0.265694	-0.248386	0	-0.203149	0	-0.226301	-0.366978	0	-0.236815	-0.240797	-0.169736	-0.0311785	-0.31707	-0.269477	-0.216553	-0.282058	-0.255791	-0.273287	-0.216553	0	0	-0.0870271	-0.271379	-0.184298	-0.228193
260	eyeA	0.0747715	0.441289	1.02656	0.434212	0.137897	0.490199	0.480548	0.461052	0.696255	0.451204	0.369904	0.718316	0.507618	0.480548	0.294803	0.162259	0	0.499785	0.485381	0.461052	0.426287	0.305774	0.674269	0.162247	0.142636	0.364668	0.156198	0.0281664	0	0.475699	0.348843	0.359412	0.289286	0.416198	0.640663	0.343529	0.119361	0.406038	0.640663	0.168582	0.899854	0.485381	0.411127	0.441289	0.715576
261	ykfC	0.298554	-0.105493	-0.166461	-0.36257	-0.408885	-0.0565835	-0.0662337	-0.0857299	-0.100527	-0.0955777	-0.176878	0.622269	7.56659	-0.0662337	-0.251979	0.0758355	-0.115477	-0.0469975	-0.0614005	-0.0857299	-0.120495	-0.241008	-0.372513	-0.384535	-0.490986	-0.182114	-0.390584	-1.01862	0.372921	-0.0710831	-0.197939	-0.18737	-0.257496	-0.130584	-0.156119	0.237307	-0.427421	-0.140744	-0.156119	-0.161281	-0.22741	-0.0614005	-0.135655	-0.105493	-0.331206
262	insH1	0	0.196751	0.522771	0	0.324186	0.245661	0.236011	0.216515	0.201718	0.373334	0.556194	0.737987	0.273529	0.236011	0.314426	0.0396417	0.121882	0.255247	0.240844	0.216515	0.181749	0.0612365	0.0963984	0.0843758	0.364913	0.286797	0.0783268	0.268111	0.109861	0.231161	0.104305	0.114874	0.0447483	0.17166	0.146125	0.55944	0.04149	0.161501	0.146125	0.140964	0.241501	0.240844	0.333256	0.196751	0.137705
263	mmuP	-0.451102	0.836781	0.449793	0.776456	0.405954	0.836781	0.836781	0.836781	0.836781	0.670114	0.405954	0.176332	0.576332	0.836781	0.572621	0.214861	0	0.836781	0.836781	0.836781	0.836781	0.836781	0.670114	0.670114	0.283126	0.670114	0.670114	0.352299	0.511947	0.836781	0.836781	0.836781	0.836781	0.836781	0.836781	0.376332	0.670114	0.836781	0.836781	0.836781	0.670114	0.836781	0.670114	0.836781	0.670114
264	mmuM	-0.207518	-0.644325	-0.838113	-0.359976	-0.526446	-0.785576	-0.59537	-0.758362	0.652163	-0.785476	-0.548818	-0.416017	-0.446728	-0.795226	-0.901616	-1.1638	-1.12227	-0.7296	-0.779899	-0.522971	-0.815563	-0.60072	0	0	0	-0.552707	-0.333896	-0.170812	-0.41567	-0.767287	-0.271937	-0.556609	-0.373293	-0.627268	-0.70172	-0.579987	0.58621	-0.650699	-0.662116	-0.226554	-0.475362	-0.740295	-0.815237	-0.812641	-0.663418
265	afuC	0	0	0	0	0.0603441	0	0	0	0	0	0	0	0.293349	1.06823	0	0	0	0.00150454	0	0	0	0	0.866586	0.525307	0.750121	0.153062	0.0458911	0.1014	0	0	0	0	0	0	0	0	1.08996	0	0	0.188135	0.124792	0	0	0	0
266	afuB	-0.0224406	-0.165562	-0.200692	-0.0605523	-0.14001	0	-0.199497	-0.197261	-0.313172	-0.136826	-0.249681	-0.381883	0	0	-0.277743	-0.281536	-0.442742	-0.162363	-0.0367263	-0.228646	-0.118735	0	0	-0.0525194	0	-0.254399	-0.164918	-0.0653394	0	-0.114757	0	-0.259134	-0.353703	-0.0205965	-0.141869	-0.232903	-0.174961	-0.26663	-0.280483	-0.238055	-0.0986795	-0.17534	-0.172936	-0.0764532	-0.388729
267	insB1	0	0	0	0	0	0	0	0	0	0	0	0	0.0750595	0.438532	0	0	0	0	0	0	0	0	0	0	0.729583	0	0	0	0	0	0.919821	0	0	0	0	0	0	0	0	0	0	0	0	0	0
268	insA	0	0	0	0	0	0	0	0	0	0	0	0	0	0	0	0	0	0	0	0	0	0	0	0	0	0	0	0	0	0	0	0	0	0	0	0	0	0	0	0	0	0	0	0	0
269	insI1	0	0	0	0	0	0	0	0	0	0	0	0	0	0	0	0	0	0	0	0	0	0	0	0	0	0	0	0	0	0	0	0	0	0	0	0	-0.0158356	0	0	0	0	0	0	0	0
270	insX	0	0	0	0.243449	0.0120595	0.448209	0	0	0	0	0	0	0	0	0	0	0	0	0.00611795	0	0.0346385	0	0	0	0	0	0	0	0.219565	0	0	0	0	0.0399372	0.031624	0	0	0	0	0	0	0	0	0	0
271	yagB	0.0157657	0.480684	0.443637	0.214037	0.455994	0.306566	0.517459	0.499196	0.485336	0.489972	0.413817	0.546231	0.38066	0.0172938	0.644411	0.167316	0.0483566	0.535211	0.706438	0.499196	0.613154	1.98698	1.55985	0.34587	1.33569	0.381787	0.437427	0.725843	0.0466374	0.525574	0	0.581204	0.464884	0.776224	0.417899	0.783915	0.175847	0.447664	0.433262	0.395087	0.364431	0.521986	0.452431	0.670557	0.226028
272	yagA	-0.0642598	0.793969	0.65044	0.634145	0.586079	0.89109	0.808878	0.801474	0.795855	0.797735	0.766861	0.685407	0.698498	0.987508	0.517651	0	0.328029	0.816278	0.673409	0.801474	0.735943	0.0877827	0	0.403291	0.131679	0.77456	0.297072	1.23473	-0.292161	0.731087	0.899609	0.699586	0.976753	0.670497	0.708802	0.972987	0.601463	0.780583	0.774744	0.784691	0.635193	0.810713	0.782515	0.654729	0.967626
273	yagE	-0.0565579	0.4961	0.78083	0.470987	0.234286	0.525585	0.532377	0.514362	0.500689	0.505262	0.430137	0.398599	0.331523	0.496651	0.72187	0.909849	0.296296	0.550134	0.764304	0.514362	0.492703	0.701822	2.09725	1.96582	2.47149	0.42336	1.17477	0.35921	0.115194	0.743086	0.382525	0.433099	0.50754	0.495703	0.662507	0.362536	0.412673	0.463526	0.449319	0.442167	0.72293	0.536843	0.468228	0.723948	0.552648
274	yagF	-0.296962	-1.38464	-1.11228	-1.30839	-1.15972	-1.33573	-1.34538	-1.36488	-1.37968	-1.37473	-1.1227	-1.50386	-1.56831	-1.34538	-0.864463	0	-1.33799	-1.32615	-1.00722	-1.36488	-1.39965	-0.853492	-0.211021	-0.802032	-0.380162	-1.12793	-0.0672835	-1.29777	0.809797	-1.35023	-1.14376	-0.9382	-0.86998	-1.40973	-1.43527	-0.815737	-0.844918	-1.41989	-1.10194	-1.44043	-1.50656	-1.34055	-0.886485	-1.38464	-1.61036
275	yagG	0.00900932	-0.715481	-0.635646	-0.490511	-0.715885	-0.777041	-0.731786	-0.801082	-0.731247	-0.646422	-0.876264	-0.624225	-1.00436	-0.834202	-0.35937	-0.190182	0.0813941	-0.769134	0.308591	-0.719042	-0.751232	-0.746679	-0.152784	-0.590106	-0.0362427	-0.462833	-0.266455	-0.576378	-1.03934	-0.735786	-0.61612	-0.718881	-0.512567	-0.753736	-0.779319	-0.68687	-0.861881	-0.879719	-0.867605	-0.781506	-0.917993	-0.781015	-0.54071	-0.733126	-0.635358
276	yagH	-0.162621	-0.24302	-0.361174	-0.927139	-0.517138	-0.391152	-0.283865	-0.405305	-0.469031	-0.538085	-0.449565	-0.52755	-0.412073	-0.169164	-0.291777	-0.919631	-0.505611	-0.386497	-0.681233	-0.461846	-0.519143	0.300103	0.171111	0.477381	0.0403172	0.350399	-0.768285	-0.548606	-1.07246	-0.286219	-0.438285	-0.54523	-0.711405	-0.249612	-0.521525	-0.619112	-0.61423	-0.314503	-0.536812	-0.500222	-0.474652	-0.393491	-0.461699	-0.445944	-0.375156
277	yagI	-0.0886219	-1.01958	-0.91059	-0.648867	-1.13607	-1.13907	-1.17471	-1.16298	-1.07202	-0.903247	-1.23776	-0.995198	-1.14474	-1.18741	-0.652184	-0.132241	-0.0937346	-1.13121	-1.16358	-1.05988	-0.921472	-1.10476	-0.730222	-0.251173	0	-1.27426	-1.23243	-0.704937	-0.374309	-1.17868	-0.757346	-1.13315	-1.05843	-1.24371	-1.01231	-0.949168	-0.602851	-1.1283	-0.818729	-1.11489	-1.27695	-1.14303	-1.02767	-1.18142	-1.01407
278	argF	0	-0.0139427	0	-0.456378	-0.259091	0	0	0	0	0	0	0	0	0	-0.177462	-0.418828	-0.0189583	0	0	0	0	0.584069	-0.161483	-0.17719	-0.0475731	0	-0.0881131	0	-0.000250638	0	-0.237507	-0.0390362	-0.146524	0	0	0	-0.476892	1.56049	-0.164996	-0.0220784	-0.00717512	0	0	0	0
279	ykgS	0.0933791	0.012253	0	0	0	0.073745	0.0459039	0	0.0165098	0	0.118878	0	0	0.0459039	0	0	0	0.0623921	0.0500466	0	0	0	0.0157754	0	0.273098	0.00137214	0	0	0	0.217483	0	0.0636645	0	0.0103159	0	0	0	0	0	0	0	0.0500466	0.0411944	0.012253	0
280	insB1	0.132894	0	0	0	0	0	0	0	0	0	0	0	0	0	0	0	0	0	0	0	0	0	0	0	0	0	-0.156749	-0.885311	-0.579599	0	0	0	0	0	0	0	-0.101016	0	0	0	0	0	0	0	0
281	insA	0	0	0	0	0	0	0	0	0	0	0	0	0	0	0	0	0	0	0	0	0.097827	0	0	0	0	0	0	0	0	0	0	0	0	0	0.0622031	0	0	0	0	0	0	0	0	0	0
282	yagJ	0	0.113992	0.544102	0.117894	0.11916	0.0466152	0.119601	0.228233	0.114702	0.476682	0	0.349076	0.129518	0.119601	0.3072	0.432831	0.201808	0.122349	0.120291	0.257645	0.219423	0.936695	0.746377	1.1583	0	0.294827	0	0	0	0	0.0181785	0	0.175014	0.0360437	0.137474	0.582622	0	0	0.0820304	0.166015	0.111555	0.120291	0.301464	0.113992	0.432844
283	yagK	0.177337	0.641632	0.474668	0.510111	0.58848	0.9497	0.675283	0.759367	0.645889	0.681994	0.710418	0.59018	0.580611	0.675283	0.448376	0.647786	0.648096	0.691771	0.679426	0.627014	0.702347	0.301973	0.466076	0	0.377031	0.521162	0.510548	0.17378	-0.113286	0.803887	0.699671	0.706827	0.725905	0.886271	0.571117	0.428247	0.849734	0.761411	0.600528	0.69937	0.646856	0.679426	0.560985	0.641632	0.733979
284	yagL	0.471627	0	0	0	0	0	0	0	0	0.0108261	0	0	0	0	0	0	0	0	0	0	0	0	0	0.43172	0	0	0	-0.20236	-0.587676	0	0	0	0	0	0	0	0	0	0	0	0	0	0	0	0
285	yagM	0.111603	-0.120469	-0.181437	-0.0442124	0	-0.0715592	-0.0812093	0	-0.115502	0	-0.191853	0	-0.30414	-0.0812093	-0.266955	-0.371178	0.0224459	-0.0619731	-0.0763762	-0.100705	-0.135471	-0.255984	0	1.25224	-0.505962	-0.19709	0.00409095	-0.0172475	-0.0419549	-0.0860587	-0.212915	0	0	-0.14556	-0.171095	-0.218229	0	-0.15572	-0.171095	0	-0.242386	-0.0763762	-0.150631	-0.120469	-0.346182
286	yagN	0	0.323187	0.161047	0.235261	0	0.233887	0.216254	0.208947	0.204756	0.327591	0.147718	0.0922287	0.0256378	0.109402	0.447651	0	0	0.229006	0.219458	0.203329	0.212008	0.0442123	0.0422643	1.68624	0	0.137561	0.0718793	-0.120023	-0.481115	0.213039	0.0615275	0.359751	0.0274713	0.46532	0.155357	0	0.203605	0	0.103773	0.291822	0.0424483	0.225076	0.101039	0.190228	0.375027
287	intF	0.367798	0.338302	0.207312	0	0.344199	0.281387	0.297353	0.272974	0.251762	0.345717	0.213138	0	0.566058	0.511056	0.150778	0.69358	0.196991	0.310322	0.300612	0.28421	0.530655	0.291888	0	0	0	0.55631	0.627026	0.388869	0.276621	0.294084	0.343395	0.10142	0.292393	0.197401	0.239376	0.498236	0.104902	1.30483	0.342543	0.289456	0.169525	0.289376	0.336176	0.270886	0.421032
288	ptwF	0.0620329	0	0	0	0.0880958	0	0	0	0	0	0	0.228458	0	0	0.31229	0	0	0	0	0	0	0	0.306606	0	0.255875	0	0	0	0	0	0	0	0	0.104883	0	0	0.0236952	0	0	0	0.153086	0	0.052765	0	0.0854729
289	yagP	0	0	0	0	0	0	0	0	0	0	0	0	0	0	0	0	0	0	0	0	0	0	0.178503	0	0	0	0.24896	0.0168821	0.0751459	0	0	0	0	0.104707	0	0	0	0.021387	0	0	0	0	0	0	0
290	ykgT	0	0	0	0	0	0	0	0	0	0	0	0	0	0	0	0	0.0610944	0	0	0	0	0	0.171269	0	0.455235	0	0.0694508	0	0	0	0	0	0	0	0	0	0	0	0	0	0	0	0	0	0
291	paoD	0	0.514565	0.631179	0.619013	0.492626	0.734884	0.557237	0.623106	0.69341	0.523863	0.52499	1.37466	0.289334	0.539428	0.28487	0.352169	0.469423	0.575392	0.561798	0.538836	0.566867	0.549585	0.0566126	0.430381	0	0.419776	0	0.447628	-0.258807	0.55266	0.421694	0.799922	0.446863	0.453563	0.452756	0.48681	0.448265	0.384512	0.678999	0.546181	0.400746	0.646068	0.453801	0.520183	0.398766
292	paoC	-0.40454	-0.181896	-0.076197	-0.272306	-0.151955	0	-0.142636	0	-0.176929	-0.00531356	0.0717229	-0.301109	0.135482	-0.142636	-0.328382	-0.0300983	-0.858546	-0.1234	-0.137803	0	-0.0302312	0	-0.115582	-0.127605	-0.136562	0	0.465012	0	0	-0.147486	-0.107675	0	0.0171468	-0.206987	0.11656	-0.279656	-0.00382379	-0.0504799	-0.232522	-0.0710168	-0.303813	-0.137803	-0.045391	-0.181896	-0.240942
293	paoB	0.124361	-0.569385	-0.367035	-0.171899	-0.516616	-0.572743	-0.601986	-0.606723	-0.670489	-0.557747	-0.713198	-0.803496	-0.680357	-0.539526	-0.739999	-0.426947	0	-0.480104	-0.697266	-0.490059	-0.512721	-0.793187	-0.262604	-0.54391	0.349159	-0.766608	-0.37878	-0.196631	-0.05395	-0.709814	-0.586191	-0.208068	-0.376999	-0.650593	-0.656198	-0.45361	-0.785221	-0.635213	-0.576165	-0.639142	-0.48992	-0.599071	-0.710544	-0.613291	-0.498516
294	paoA	0.0241943	-0.0387644	-0.272454	-0.329933	-0.199443	-0.118673	-0.032836	0	-0.0037552	0	0	0	0	-0.0523545	0	-0.261565	-0.0827243	-0.088949	0.276024	-0.0134066	-0.170953	0	0.17451	0.0207304	0	0	-0.0440244	-0.0596717	-0.398041	0.0270146	0.375185	-0.194997	-0.104327	-0.0123569	-0.077691	-0.026584	-0.0147017	-0.115345	0	-0.0657363	-0.209916	-0.0304241	-0.0778888	0	-0.218642
295	yagU	0.245853	-0.450528	-0.315379	-0.362151	0	-0.317896	-0.452519	-0.760054	-0.340043	-0.615977	-0.19829	-0.249453	-0.553331	-0.318492	-0.385606	0	-0.548291	-0.432575	0.11776	-0.242841	-0.37362	0	0	0	-0.0638705	-0.231528	-0.404604	-0.356956	-0.0338062	0	0.136337	-0.348836	-0.358762	-0.662018	-0.46211	-0.666987	-0.424152	-0.393673	0	-0.273548	-0.239397	-0.452004	-0.155112	-0.329715	-0.0482931
296	ykgJ	0	-0.379105	-0.367795	-0.280716	-0.685874	-0.326079	-0.420451	0	-0.540663	-0.255764	-0.470708	-0.72264	-0.437371	-0.521297	0	-0.134189	0	-0.412302	-0.671943	-0.47931	-0.423463	-0.843557	-0.772937	-0.757858	0	-0.696566	0	-0.174723	0	-0.631833	-0.553578	-0.312889	-0.300828	-0.196667	-0.487412	-0.243881	-0.160098	-0.432367	-0.69342	-0.471739	-0.706538	-0.41685	-0.359285	-0.475747	-0.534097
297	ecpE	0.0420765	0	0	0	0	0	0	0	0	0	0	0	0	0	0.0445719	0.0548561	0	0	0	0	0	0	-0.061853	0	-0.518541	0	-0.149652	0	-0.420166	0	0	0	0	0	0	0	0	0	0	0	0	0	0	0	0
298	ecpD	-0.107427	0.427933	0.366965	0.50419	0.791208	0.476843	0.467193	0.447696	0.432899	0.437849	0.356549	0.30872	0.244262	0.467193	0.251733	-0.306367	0.612937	0.486429	0.432772	0.447696	0.746264	0.292418	0.160913	0.148891	0.04244	0.351312	0.142842	0.376465	0.0162085	0.462343	0.623375	0.346056	0.27593	0.736176	0.377307	0.330173	0.106005	0.392682	0.377307	0.372145	0.306016	0.472026	0.397771	0.427933	0.20222
299	ecpC	-0.431226	-0.318928	-0.379896	-0.242671	0.0443467	-0.270018	-0.279668	-0.299165	-0.313962	-0.309012	-0.390312	-0.438141	-0.502599	-0.279668	-0.465414	-1.09796	-0.328912	-0.260432	-0.274835	-0.299165	-0.33393	-0.454443	-0.585948	-0.264637	-0.1761	-0.395549	-0.604019	-0.70373	0.0667866	-0.284518	-0.411374	-0.400805	-0.470931	-0.344019	-0.369554	-0.416688	-0.307523	-0.354179	-0.369554	-0.374716	0.0874757	-0.274835	-0.34909	-0.318928	-0.544641
300	ecpB	0	0	0	0	0	0	0	0	0	0	0	0	0	0	0	0	0.146484	0	0	0	0	0	1.04361	-0.38766	0	0	0	0	0	0	0	0	0	0	0	0	-0.151541	0	0	0	0	0	0	0	0
301	ecpA	-0.103564	0	0	0	0.45307	0	0	0	0.235766	0	0	0.0165187	0	0	0	0.250315	0	0	0	0	0	0	0	0	0	0	0	0	0.140528	0	0	0	0.168528	0	0	0.0360215	0.0140506	0	0	0.103444	0.0140603	0	0	0	0
302	ecpR	-0.0358987	-0.859508	-0.656316	-0.685758	0	-0.810598	-0.820249	-0.839745	-0.590381	-0.849593	-0.764226	-0.645388	-0.612352	-0.820249	-0.741834	-0.220706	0.0164138	-0.801012	-0.815415	-0.839745	-0.87451	-0.495023	-0.38877	0	-0.691347	-0.936129	-0.713772	-0.577643	0.137613	-0.825098	-0.618621	-0.941385	-0.511511	-0.884599	-0.576801	-0.957268	-0.0773447	-0.894759	-0.910134	-0.528308	-0.981425	-0.815415	-0.88967	-0.859508	-0.32106
303	ykgL	0	0	0	0	0	0	0	0	0	0	0	0	0	0	0	-0.334267	-0.107801	0	0	0	0	0	-0.404798	0.995543	0	0	0	0	0	0	0	0	0	0	0	0	0.0226314	0	0	0	0	0	0	0	0
304	ykgO	0	0	0	0	0	0	0	0	0	0	0	0	0	0	0	0	0	0	0	0	0	0	0	0	0	0	0	0	0	0	0	0	0	0	0	0	0	0	0	0	0	0	0	0	0
305	ykgM	0.2483	0.946138	0.88517	0.689061	0.416211	0.995048	0.985398	0.965901	0.833221	0.956054	1.37475	0.818666	0.762467	0.985398	1.29965	0.041951	0	1.00463	0.990231	0.965901	0.931136	4.31062	0.157316	0.171553	3.368	0.869517	0.661047	0.533016	1.29902	0.980548	0.853692	0.864261	0.709871	0.921047	0.895512	0.830367	0.594553	0.910887	0.895512	1.99959	0.817191	0.990231	0.915976	0.946138	1.22043
306	ykgR	0.0114889	0.358629	0	0	0.829213	0.0742054	0.0645552	0.045059	0.030262	0.368545	0	0.239416	0.174958	0.0645552	0	0.774587	0.122621	0.0837914	0.0693883	0.045059	0.343627	0	0	0.274574	-0.0268641	0	0.51418	0.168815	-0.051388	0.0597058	0	0.276752	0.873293	0.333538	0.308003	0	0.760009	0	0	0	0	0.0693883	0	0.0252958	0.327904
307	ykgP	0.250451	0	0	0	0	0	0	0	0	0	0	0	0	0	0	0	0	0	0	-0.066611	0	0	0	0	1.06352	0	0	0	-0.404417	0	0	0	0	0	0	0	0	0	0	0	0	0	0	0	0
308	eaeH	0.177642	-0.684559	-1.12521	-1.46593	-0.00823125	-1.22982	-1.24027	-1.28563	-1.21429	-1.27052	-1.05155	-0.992531	-0.889323	-1.27345	-1.2592	-1.09345	-0.941318	-1.22007	-1.25132	-0.803616	-0.920349	-1.24823	-1.20973	-1.07476	0	-1.28612	-1.2061	-1.06867	0	-1.2648	-1.31505	-0.713669	-0.463399	-0.737803	-1.07744	-1.19663	-0.607788	-1.06544	-1.14106	-1.21345	-1.43463	-1.04295	-1.29989	-0.874443	-0.723893
309	insE1	0	0	0	-0.0727108	0	0	0	0	0	0	0	0	0	0	0	0	0	0	0	0	0	0	0	0	0	0	0	0	-0.791873	0	0	0	0	0	0	0	-0.478842	0	0	-0.148345	0	0	0	0	-0.463132
310	insF1	0	0	0	0	-0.141517	0	0	0	0	0	0	0	0	0	0	0	0	0	0	0	0	0	0	0	0	0	0	0	0	0	0	0	0	0	0	0	0	0	0	0	0	0	0	0	0
311	ykgA	0.104391	0	0	0	0	0	0	0	0	0	-0.0375068	0	0	0	0	0	0	0	0	0	0	0	0	0	0.262207	0	-0.186779	-0.479855	0	0	0	0	0	0	0	0	0	0	0	-0.0167549	0	0	0	0	0
312	ykgQ	0	-0.570383	0	0	-0.0950641	0	0	0	0	0	0	0	-0.397839	0	0	0	0	0	-0.0131447	-0.247	-0.0184117	0	0	0	0	-0.258028	0	-0.328084	0	0	0	-0.196682	0	0	-0.0635429	0	0	0	0	0	0	0	-0.0688385	0	-0.0860181
313	rclC	0	0	-0.242328	-0.15572	-0.234762	-0.169917	-0.165918	-0.0366156	-0.467286	-0.161392	-0.00273463	-0.196972	-0.239623	0	0	-0.0845828	0	-0.17075	-0.0602208	-0.167868	0	0	-0.265031	0	0	0	0	0	-0.442417	-0.0675189	-0.450522	-0.0112363	-0.421616	0	-0.302386	-0.0692042	-0.155087	-0.412602	-0.111408	0	0	-0.128332	-0.0772603	-0.191347	0
314	rclB	-0.142144	-1.07101	-1.57159	-1.2505	-1.03141	-1.49723	-1.50608	-1.24971	-1.2044	-1.28452	-1.26046	-1.32076	-1.20343	-1.46741	-1.06027	-0.336033	-0.557545	-1.48781	-1.48208	-0.990427	-1.30358	-1.55209	-1.75293	-1.62465	-1.79221	-0.957456	-0.271106	-0.589753	-0.713724	-1.49125	-1.04846	-1.47578	-1.26923	-1.37411	-1.33279	-1.07375	-0.568573	-1.32993	-1.53506	-0.818865	-1.58272	-1.44373	-1.06809	-1.45042	-0.476633
315	rclA	0.00764813	0	0	-0.0664984	0	0	0	0	0	0	0	0	0	0	0	0	0	0	0	0	0	-0.295333	0	0	0	-0.21969	0	-0.268715	0	0	0	0	0	0	0	0	-0.361383	0	0	-0.511647	0	0	0	0	0
316	rclR	-0.0179807	-0.826391	-0.745885	-0.636088	-0.300691	-0.862068	-0.898861	-0.83844	-0.899961	-0.690499	-0.715049	-0.46316	-0.572978	-0.900663	-0.615005	-0.0222738	0	-0.854403	-0.797004	-0.783824	-0.811006	0	-0.858747	-1.08738	-0.585152	-0.747397	-0.381635	-0.338666	-0.431543	-0.80413	-0.804181	-0.860676	-0.818166	-0.634816	-0.584338	-0.446307	-0.38957	-0.929364	-0.95035	-0.947777	-0.990162	-0.794649	-0.655646	-0.764911	-0.566856
317	ykgE	-0.132629	-0.475956	-0.316565	-0.488861	-0.314028	-0.42056	-0.241702	-0.454002	-0.457614	-0.399839	-0.567585	-0.388484	-0.130982	-0.332284	-0.0999739	-0.321848	-0.285562	-0.412368	-0.437207	-0.373023	-0.349668	-0.462148	-0.320278	-0.60895	-0.285443	-0.456059	-0.505509	-0.51497	-0.211833	-0.445594	-0.299713	-0.369781	0	-0.525217	-0.388774	-0.461004	-0.427639	-0.492485	-0.504044	-0.456475	-0.240538	-0.437635	-0.537163	-0.382679	-0.134777
318	ykgF	-0.000787464	0.0204478	0	0	0	0.0693574	0.202564	0.183068	0.025414	0.17322	0	0.0185415	0.104549	0.0597072	0.0338021	0	-0.0704437	0.0789434	0.0645404	0.183068	0.00544563	0	0.181999	0	0.373515	0.0657397	0	0.0907916	0	0.0548578	0	0.307851	0.302572	0	0.112679	0.0655449	0.0327689	0	0	0	0.267811	0.0645404	0	0.163305	0
319	ykgG	0.151302	0	0	0	0	0	0	0	0	0	0.198958	0.0596173	0.0418652	0	0.15536	-0.117863	-0.176424	0	0	0	0	0.723742	0	-0.0845476	-0.0636666	0	1.77023	0.304498	1.43197	0	0	0	0.32037	-0.117278	0	0	0.220085	0	0	-0.0735454	-0.0181882	0	0	-0.149008	0
320	ykgH	-0.00651374	-0.49924	-0.417351	-0.172751	-0.237854	-0.45033	-0.388552	-0.408048	-0.494274	-0.417896	-0.171699	-0.362384	-0.283985	-0.459981	-0.110594	-0.134863	-0.177166	-0.440744	-0.455147	-0.223408	-0.115316	-0.0842294	-0.623403	-0.611269	-0.414977	0.146607	0	0.524171	-0.0073917	-0.46483	-0.264189	-0.396477	-0.199677	-0.130509	-0.293797	-0.22772	-0.136528	-0.534491	-0.407009	-0.277946	-0.544532	-0.455147	-0.457973	-0.066707	-0.540313
321	betA	-1.10528	0	0	0	0.284904	0	0	0	0	0	0	0	0.242745	0	0	0.16857	0	0	0	0	0	0	0	0	0	0	0.0712091	-0.464598	-0.268517	0	0	0.0184635	0	0	0	0	0.285714	0	0	0	0	0	0	0	0
322	betB	-0.185783	0.839748	1.23018	0.764616	1.1476	0.860898	0.856725	0.848294	0.922977	0.844036	0.88996	0.881383	0.895885	0.856725	0.776403	0.64528	0.824566	0.865043	0.978221	0.992438	0.914342	0.718084	0.188758	0.737099	0.131471	0.785482	0.708181	0.278384	0.409893	0.935709	1.025	0.862969	0.710954	0.828898	0.754793	0.752428	0.885675	0.842522	1.10614	0.896705	0.741982	0.858815	0.726752	0.839748	0.697097
323	betI	-0.154918	0.628008	0.495285	0.653802	0.333684	0.667665	0.65984	0.644032	0.659062	0.636048	0.597156	0.541082	0.467105	0.65984	0.509236	0.173523	0.171847	0.675437	0.493178	0.580969	0.642871	0.608221	1.17654	0.518875	1.45841	0.575128	0.521027	0.622042	0.45176	0.682935	0.517016	0.696378	0.594852	0.607664	0.67705	0.75595	0.49219	0.716543	0.460834	0.609802	0.736363	0.663759	0.746342	0.628008	0.652205
324	betT	0.0747991	-0.214592	-0.275561	-0.671669	-0.317985	-0.365683	-0.375333	-0.394829	-0.409626	-0.404677	0	0.191963	-0.081271	-0.375333	-0.561079	-0.27663	-0.790592	-0.356097	2.89345	-0.394829	-0.229595	-0.550107	-0.281612	-0.176642	-0.0830932	-0.491214	-0.382691	-0.49373	-0.826317	-0.380182	-0.507039	0	-0.0496031	-0.239683	-0.265219	0	-0.536521	-0.249843	-0.265219	-0.27038	-0.53651	-0.3705	-0.444754	-0.214592	-0.640305
325	yahA(pdeL)(pdeL)	0.161393	0	-0.273621	0.305174	0.00940208	0	0	0	0	-0.0191587	-0.371388	0.367697	0	-0.210618	0.545757	0	-0.0318733	0	1.5476	-0.157758	-0.187436	16.2671	16.2111	15.9291	15.9801	0.328403	0.166049	0.0618226	-0.268371	-0.077937	-0.192207	2.16634	-0.129988	5.84052	0.0314109	0.179264	-0.109899	0.884542	0.161403	0.0159037	0.599552	-0.294016	-0.29427	-0.223886	-0.00145681
326	yahB	0.287041	-0.622374	-0.173894	-0.479451	-0.408774	-0.573465	-0.783115	-0.802611	-0.817408	1.66507	-0.280818	-0.741588	-0.606045	-0.298868	-0.251868	-0.537018	-1.30262	-0.562274	-0.123453	-0.539508	-0.562402	0	0	0	0	-0.382003	-0.707466	-0.0570334	-1.09277	-0.75679	-0.520945	0	-0.522382	0	-0.356008	-0.392014	0	-0.457625	-0.673	-0.878162	-0.944292	-0.401827	-0.734828	-0.415827	-0.847504
327	yahC	0.0167542	0	0.207294	0	0	0	0	0	0	0.607823	0.204969	0	0	0	0	0	0	-0.00267441	-0.229728	0	0	-0.228264	-0.47088	0	-0.331361	0	0	0.0923695	0	0	0	-0.285737	0	-0.193149	0	-0.0185466	0.398714	0	0	0	0	-0.0980807	0	0	0
328	yahD	-0.44023	-0.00998248	0.480207	-0.467059	-0.313375	0.0389271	-0.170723	0.00978077	-0.00501623	-0.200067	0	-0.329196	-0.193653	-0.170723	0.243531	0.0894513	-0.155581	-0.149347	0	0.00978077	-0.224985	0	0	1.3699	0	0.0303887	-0.495074	-0.141727	-0.217234	0.0244275	0.0975713	0	-0.161986	-0.0805539	-0.0606086	-0.0929052	0.0661109	-0.245233	0.256384	0.13423	-0.3319	-0.0874253	0.076848	-0.209982	-0.118703
329	yahE	-0.178079	-1.09294	-1.4709	-1.467	-1.04893	-1.36102	-1.17067	-1.39016	-1.20496	-1.40001	-1.16432	-1.01215	-1.5936	-1.37067	-0.994943	-0.910494	-0.548426	-1.35143	-1.36584	-1.39016	-1.22493	-0.82845	-1.35996	-0.571978	-1.07843	0.328814	-1.19052	-0.889065	-0.638477	-1.17552	-0.837988	-1.2918	-1.16193	-0.801034	-1.26055	-1.30769	-0.302308	-1.24518	-1.46055	-1.46572	-1.01485	-1.16584	-0.923097	-1.40993	-0.684663
330	yahF	-0.518569	0	0	0	0	0	0	0	0	0	0	0	0.201801	0	0.195147	0	-0.275037	0	0	0	0	0	0.24128	1.24313	0	-0.288643	-0.100272	0.123498	0	0	0.249186	0.0394344	0.066802	0.0962204	0.00151238	0	-0.266514	0.7028	0	0	0.219715	0	0	0	0.159759
331	yahG	-0.211821	-0.424665	0.0327846	0	-0.493061	-0.231668	-0.385406	-0.313993	-0.237881	-0.41475	-0.314232	-0.452969	-0.37334	-0.385406	-0.480242	-0.469439	-0.193046	-0.275261	-0.198755	-0.313993	-0.439667	-0.287453	0.0286715	-0.105075	0.196305	-0.501287	-0.421582	0	-0.0118413	-0.390255	-0.244384	-0.324724	-0.159854	-0.449756	-0.475291	-0.431516	-0.23887	-0.459916	-0.0430289	-0.207726	-0.455674	-0.289664	-0.363918	-0.333756	-0.46856
332	yahI	0.122055	0.427828	0.233664	0.097631	0	0.153618	0.143967	0.124471	0.234674	0.114623	0.0333233	0.235495	0.119157	0.143967	0.0832219	0	-0.158894	0.163204	0.148801	0.124471	0.0897058	0.094193	0.33052	0.523786	0.21038	0.0280867	0.368656	0.0665854	0.258183	0.139118	1.59582	0.147831	0.275825	0.079617	0.377202	0.205068	0.2309	0.0694571	0.252202	0.29892	0.107791	0.148801	0.074546	0.104708	0.0039952
333	yahJ	-0.350887	0.135	0.407365	0.00402748	0.551929	0.327736	0.174259	0.154763	0.116097	0.311582	0.0636151	0.182453	0.0968798	0.140788	0.252674	0.120131	0.109497	0.193495	0.179092	0.154763	0.0617198	-0.000515215	0.254968	1.0559	0.0828399	0.0829732	0.0165751	0.416865	0.3881	0.16941	0.36596	0.219789	0.103079	0.276575	0.0760706	0	0.0407332	0.0997489	0.25104	0.245879	0.0130824	0.179092	0.0908048	0.112521	0.132224
334	yahK	-0.091019	0	0	0.121686	0	0.0685192	0	0	0.0716068	0	0	-0.0380764	0.063347	0.100413	0	-0.0923886	-0.0997598	0	0	0	0.174833	0.068036	0	-0.172427	0	0.718697	-0.0182385	-0.0711215	0.0571682	0	0.0297803	0	0.139753	0	0.0249092	0.170787	0.317016	0	0	0	0	0	0.0420991	0.0674351	0.12367
335	yahL	0.285964	0	0	0	0.0483949	-0.12532	-0.0558192	0	-0.065294	0	-0.143361	-0.179687	-0.0913963	-0.0558192	-0.161281	0.118654	-0.545966	-0.0439111	0	0	0	-0.0402034	-0.368514	-0.277862	-0.495996	-0.127555	-0.0244649	0	-0.389232	0	-0.136635	-0.130808	0	-0.0956552	0	-0.13371	-0.0215526	-0.101945	-0.201486	-0.33299	-0.154879	-0.0528273	-0.127725	-0.106726	0.0026767
336	yahM	0	-0.420886	-0.6357	-0.499353	-0.223952	-0.554546	-0.712847	-0.676889	-0.0162851	-0.686737	-0.559052	-0.359211	-0.370561	-0.712847	-0.473415	-0.370531	-0.1372	-0.698191	-0.65256	-0.523043	-0.394029	-0.893627	-0.700016	-0.293994	-0.481999	-0.801137	-0.496321	-0.576125	-0.132627	-0.662242	-0.614626	-0.805141	-0.53103	-0.761876	-0.625358	-0.343077	-0.503755	-0.769617	-0.367747	-0.348601	-0.63708	-0.709164	-0.281464	-0.2723	-0.186808
337	yahN	0.0212034	0	0	0	0	0	0	0	-0.715343	0	0	0	0	0	0	0	0	0	0	0	-0.193558	0	0	-0.179859	0	0	0	0	0	0	0	0	-0.284467	0	0	-0.146713	0	0	0	0	0	0	-0.377358	-0.362086	0
338	yahO	0.0537452	0	0	0	0.0439239	0	0	0	0	0	0	0	0	0	0	0	0	0	0	0	0	0	0	0	0	0	0	0	0.0762426	0	0	0	0	0	0	0	0	0	-0.167689	0.00733666	0	0	0	0	0
339	prpR	-0.0895202	0.0613715	0.0482649	0.37042	-0.0123881	0	0.15187	0.103942	0.039083	0.407495	0.661771	0.352923	0.18485	0.15187	0	-0.104646	-0.0812307	0.165136	0.155203	0.414287	0.0253117	0	0.0567669	0.187603	0	0.0719523	0	0.153438	0	0.148526	0.524036	0.0366995	0	0.328699	0.00981359	0.347548	0	0.100484	0.0553973	0	0	0.155203	0.103993	0.035658	0.446704
340	prpB	-0.537291	0.464946	0.321361	0.351533	0.34226	0.953058	0.311228	0.396525	0.54671	0.456322	0.449594	0.23265	0.543496	0.311228	0.24067	-0.00355947	0.507093	0.329138	0.315728	0.465491	0.528119	1.81191	2.26266	1.57105	1.67035	0.203339	1.47536	0.449379	1.77703	0.306713	0.384576	0.293331	0.335153	0.587691	0.467741	0.313137	0.165228	0.241857	0.33099	0.906857	0.740727	0.315728	0.246595	0.542086	0.216773
341	prpC	-0.424691	0.0803647	0	0	-0.0489117	0	0	0	0	0	-0.0589018	-0.0966612	0	0	0	-0.0967668	-0.185223	0	0	0	0	-0.0305837	0	0	0.336881	0	0	-0.191248	-0.0527226	0	0.0811312	0.0413915	-0.0172848	-0.0377479	-0.0161977	0	-0.335647	-0.0303751	-0.084223	0	0	0	-4.18205e-05	0	-0.222449
342	prpD	-0.0721533	-0.103922	-0.26489	-0.560999	-0.439036	-0.255013	-0.264663	-0.184159	-0.298956	-0.294007	-0.263527	-0.303803	-0.487593	-0.264663	-0.350408	-0.146606	-0.427676	-0.245427	-0.25983	-0.284159	-0.218924	-0.13332	-0.212446	-0.382965	-0.189415	-0.380544	-0.489014	-0.197417	0.285371	-0.269512	-0.296369	-0.285799	-0.252468	-0.162967	-0.351309	0.0568139	-0.158721	-0.233098	-0.0792075	-0.0275172	-0.32584	-0.25983	-0.334076	-0.303922	-0.226649
343	prpE	-0.148168	0.704906	0.643938	0.781163	0.999008	0.753816	0.744166	0.724669	0.876539	1.04815	0.633522	1.08569	0.521235	0.744166	0.725087	0.0925432	0.556576	0.763402	0.748999	0.724669	0.689904	1.68381	1.54996	0.812852	0.916907	0.892445	1.59205	0.555944	0.720222	0.739316	0.779127	0.623029	0.886236	0.679815	0.65428	0.607146	0.716311	0.669655	1.25177	0.913279	0.582989	0.748999	0.841411	0.871573	0.812527
344	codB	-0.327444	0.430439	0.31195	0.0150222	0.43763	0.386802	0.385147	0.397105	0.355088	0.439596	0.190403	0.264214	0.254693	0.37957	0.245691	-0.0520089	-0.0995315	0.393717	0.518951	0.36495	0.426749	1.08771	0.842581	1.39254	1.49717	0.226741	0.0451792	0	0.00657095	0.376072	0.284335	0.236384	0.41654	0.331307	0.450757	0.231411	0.36883	0.325863	0.313357	0.316571	0.479539	0.381889	0.330224	0.361863	0.432865
345	codA	-0.0167554	0.198813	0.0782355	0.555077	0	0.157043	0.139053	0.31828	0.129526	0.20052	0.328278	0.304589	0.180981	0.151601	0.0349023	-0.0722559	-0.131218	0.163052	0.0988694	0.140631	0.17336	0	0.856065	0	0.85146	0.234734	0.424192	0.512079	0.387099	0.148561	0.0695432	0.451212	0.0343193	0.115405	0.0391889	0.176665	0.00933439	0.104795	0.0983373	0.0794932	0.0640231	0.157258	0.106431	0.103108	0.331742
346	cynR	-0.283749	0.149817	0.219868	0	0.023181	0.231158	0.32118	0.286111	0.193748	0.195275	0.10146	0.149784	0.194408	0.218007	0.063055	0	-0.359906	0.239268	0.236131	0.191227	0.269087	0.0764719	0	0	0.182078	0.424146	0.493047	0	0	0.213904	0.102469	0.168236	0.330318	0.129513	0.158525	0.189803	0.0717555	0.155794	0.116638	0.240609	0.0821402	0.200494	0.172877	0.381166	0.138661
347	cynT	-0.205744	-0.113241	0	-0.370318	-0.0183036	-0.0643311	-0.0739812	-0.0934774	-0.108274	-0.103325	-0.184625	-0.0102316	-0.185801	-0.0739812	-0.259727	-0.540056	-0.349137	-0.054745	-0.0691481	0	-0.128243	-0.248756	0.0129973	-0.392283	-0.14652	0	-0.0292289	-0.258931	-0.5522	-0.0788306	-0.0945758	-0.195118	-0.154133	-0.138332	-0.163867	-0.211001	-0.324058	-0.148492	-0.0527556	-0.0579173	-0.124047	0	-0.143403	0	-0.338953
348	cynS	0	0.246529	0.0862134	0	0.166256	0.0890375	0.049835	0.045875	0.0668623	0.0501875	0.0551427	0.0381459	0	0.111015	0	0	0.10563	0.0941524	0.0642817	0.156561	0.0207585	0.00399955	1.2927	0	0	0.0908217	0	0.0691296	0	0.108428	0.0631227	0.0687006	0	0.261903	0	0	0	0.0667818	0.200807	0	0.0155989	0.231092	0	0.0219605	0
349	cynX	0	0.532505	0.689834	0.630765	0.676882	0.672941	0.692971	0.680923	0.840388	0.704756	0.568078	0.910253	0.627037	0.604504	0.730802	0.340009	0	0.676654	0.720885	0.71351	0.676132	0.81726	0	0.494773	0.457188	0.827919	0.669905	0.447913	0.163823	0.602626	0.750108	0.46884	0.666598	0.450305	0.750057	0.80901	1.18742	0.586322	0.553638	0.734798	0.702354	0.972373	0.762225	0.636832	0.497303
350	lacA	-0.23157	0.313957	0.281338	0.320879	0.422229	0.3067	0.292479	0.283032	0.348373	0.218093	0.312819	0.22781	0.0597207	0.390539	0.139876	0.286102	0.58363	0.312157	0.236487	0.313688	0.254194	0	0.395233	0.326126	0.202168	0	0	0	0	0.387778	0.139273	0.459003	0.245513	0.401379	0.277764	0.286808	0.478906	0.333381	0.230512	0.0959392	0.581179	0.133991	0.292697	0.350735	0.217566
351	lacY	-0.108769	0	0.353944	0.283746	0	0.0243803	0.0208249	0.00537736	0.105434	0.166218	0.413601	0.318639	0.183362	0.121656	0.186195	0.145978	0.0223479	0.0316277	0.192512	0.135096	0	0.340679	0.123355	0.605608	0.204121	0.859914	0.33396	0.670912	0.654367	0.11799	0	0	0.218971	0.0526601	0	0.0290929	0	0.298065	0.100354	0.339863	0.164491	0.0935816	0	0.0994556	-0.0284647
352	lacZ	-0.11968	-0.809986	-1.12095	-0.420822	-1.11338	-1.01108	-1.02073	-1.04022	-0.805019	-0.80007	-0.88137	-1.1792	-0.993657	-1.02073	-0.560231	-0.362293	-1.27749	-1.00149	-1.01589	-0.790222	-0.678747	-0.695501	-0.375167	0.747391	0.0145894	0	-0.448836	0	-0.0987471	-0.775576	-0.652432	-0.891863	-0.461989	-0.688836	-0.31813	-0.511505	-0.881914	-1.09524	-1.11061	0.275983	-0.285662	-0.619652	-1.09015	-0.809986	-0.632342
353	lacI	-0.166323	-0.219121	0.149524	-0.176198	-0.164017	-0.170211	-0.0798613	-0.199357	-0.214154	-0.209205	-0.132009	-0.338334	-0.102792	-0.179861	-0.165607	-0.581158	0	-0.160625	-0.175028	-0.199357	-0.234123	-0.354636	-0.327644	-0.298163	-0.146118	-0.195742	-0.404212	-0.593012	0.333015	-0.184711	-0.153071	-0.200998	0	-0.144212	-0.169747	-0.316881	-0.341049	0.817544	-0.111251	0.125518	-0.341038	-0.175028	-0.249283	-0.0191207	-0.344834
354	mhpR	0	0.31856	0.469546	0.228149	0.265168	0.367469	0.488847	0.330581	0.323526	0.321851	0.330508	0.280829	0.379252	0.357819	0.255407	0	0.298923	0.377055	0.362652	0.338323	0.386891	0.349711	0.725817	0.504931	0.39848	0.241938	0.366802	0.0317217	0.246092	0.35297	0.358194	0.320016	0.333223	0.293469	0.351267	0.304133	0.163298	1.57588	0.483347	0.733631	0.279976	0.35133	0.371731	0.56856	0.226809
355	mhpA	-0.468196	-0.0158702	0.015429	-0.257713	0	0	0.213835	0.0464493	-0.010904	0.0397456	-0.0872549	0.0111028	0.0338199	0	0	-0.235227	-0.0851454	0	0	0	0	0	0.561496	-0.125983	-0.115649	-0.0924915	0	0.242293	1.1329	0	-0.108047	0	-0.0250162	-0.0409612	0	-0.112829	0	-0.0511211	0	0.19726	-0.134571	0.0679357	-0.0460322	-0.0158702	0.196225
356	mhpB	-0.442166	0.043366	-0.00642664	-0.106639	0.45648	0.427603	0.689189	0.040943	0.0468423	0.0363958	0.293397	-0.0646718	0.19293	0.0708476	0.890826	-0.0108222	0.566761	0.0843129	0.0742308	0.4072	0.282864	-0.0809736	0.267023	-0.182507	0.00238149	0.311253	2.91532	0.322519	0.748649	0.067453	-0.00188934	-0.0273356	0.235872	0.0258023	0.00391531	-0.005609	0.594267	0.0186904	0.532236	0.235274	-0.0225191	0.60431	0	0.043366	0.0666883
357	mhpC	0	0.0335263	0.490891	-0.0299779	0.46897	0.0275449	0	0.0536357	0.0379959	0.0444375	0.0692801	0.0633654	-0.00726203	0.0688598	0.0516888	-0.320809	0.433388	0.0861724	0.0732096	0.00131321	0.270024	0	0	0	0	0	0.800785	0.121296	0.222031	0.0644953	0	0	0	0.0109444	0	0.227676	-0.155489	0.00180052	0	0.0931803	0.392365	0	0.152417	0.0335263	0.090196
358	mhpC	0.14939	-0.0071907	0	-0.212553	0	0	0	0	-0.00293392	0	-0.074508	0	-0.0895634	0	0	-0.393369	-0.045394	0	0	0	0	-0.194678	-0.238866	-0.338206	-0.569656	-0.0797446	-0.293338	-0.0158691	-0.0327715	0	-0.157859	-0.0844985	0	-0.0286973	-0.122013	-0.100883	0	-0.0374057	-0.0505845	0	0	0	0	-0.0071907	0
359	mhpD	0	-0.70789	0	-0.354791	-0.0148777	-0.662576	-0.672226	-0.691722	-0.705052	-0.70157	-0.72416	-0.830699	-0.598559	-0.672226	-0.517534	-0.345197	-0.302532	-0.65299	-0.667393	-0.691722	-0.435035	1.14146	-0.849269	0.493985	0	-0.72416	-0.203667	-1.18297	-0.0268604	-0.405388	-0.475002	-0.726167	-0.863489	-0.722228	-0.451105	-0.72416	-0.887025	-0.728034	-0.736819	-0.759506	-0.799184	-0.417393	-0.741647	-0.70789	-0.437198
360	mhpF	0.102034	0	-0.2654	0	0.0811865	0	0	0	0	0	-0.0429132	0	0	0	-0.180875	-0.236863	0	0	0	0	-0.0829056	0.617999	-0.0196065	0.459965	0.0668851	-0.0481498	0.0548324	-0.0749345	-0.46377	-0.0433759	0	-0.0498926	0	0	0	-0.0692886	-0.215033	0	0	-0.0155341	-0.0684378	0	0	0	0
361	mhpE	-0.0497318	0.0902983	0.251552	-0.0528285	-0.0113637	0.250319	0.129558	0.110062	0.0952645	0.100214	0.130025	0.147192	0.128849	0.240669	-0.0360907	-0.515203	-0.514402	0.148794	0.446319	0.221173	0.0752961	0.108339	-0.0634319	0.158478	0.0957025	1.33917	-0.194793	-0.173725	-0.741576	0.124708	0.108963	0.00842125	0.114402	0.0652073	0.307172	0	0.0555882	0.0550474	0.135237	0.124633	0.0508125	0.0543511	0.0601363	0.0902983	-0.0243034
362	mhpT	0	0	-0.0508974	-0.0255517	-0.230609	0	0	0	0	0	0	0	-0.12873	0	0.0563479	-0.324894	-0.0625957	0	0	0	0	-0.0373218	0	-0.167117	-0.22039	0.526621	0.26793	-0.182	0	0	0	-0.0170632	-0.0502767	-0.0487744	0.177462	0	-0.144813	-0.105144	0.139914	0.188894	0.258116	0.720358	-0.025973	0	0.227566
363	yaiL	-0.10164	-0.400072	-0.538068	-0.559271	-0.186025	-0.53298	-0.54263	-0.562127	-0.576924	-0.571974	-0.562365	-0.610194	-0.457725	-0.54263	-0.455649	-0.280777	-0.356122	-0.523394	-0.446888	-0.562127	-0.596892	-0.616317	-0.576182	0	0.104173	0.549193	-0.594254	-0.520837	-0.0657874	-0.54748	-0.674336	-0.477295	-0.629272	-0.50277	-0.30661	-0.497832	-0.500687	0.710883	-0.30661	-0.311772	-0.521989	-0.537797	-0.604968	-0.400072	-0.299879
364	frmB	0.381024	0.359649	0.478335	0.286534	0.379071	0.401401	0.393163	0.37652	0.363888	0.368113	0.445052	0.219224	0.164199	0.393163	0.2346	0.312669	-0.383779	0.409584	0.568021	0.327739	0.322452	0.243965	0.344256	0.267783	0.145619	0.846154	0.103699	0	0.294881	0.364633	0.280731	0.411705	0.2055	0.299572	0.316431	0.422537	0.231174	0	0.316431	0.312025	0.231183	0.397289	0.333901	0.530381	0.329744
365	frmA	0.143392	0.174848	0.096925	0.0710733	0.237962	0.217793	0.20932	0.192201	0.179209	0.183554	0.23412	0.302119	0.245522	0.20932	0.0462262	0.367514	0	0.22621	0.189173	0.484884	0.308017	0.0558594	0.665085	0.0517867	0.314336	0.457298	0	0	-0.0142786	0.351403	0.0936759	0.371249	0.187724	0.384763	0.130396	0.210961	0.0141308	0.190976	0.130396	0.125864	0.21414	0.213564	0.148364	0.150458	0
366	frmR	0	-0.624502	-0.526456	-0.523083	-0.278709	-0.575592	-0.585243	-0.604739	-0.619536	-0.514587	-0.373175	-0.326723	-0.391181	-0.585243	-0.770988	-0.0695245	-0.330457	-0.566006	-0.580409	-0.304739	-0.381008	-0.501521	0	-0.545048	-0.219306	0	-0.709593	-0.656889	-0.671435	-0.490092	-0.516948	-0.500628	-0.518009	-0.291097	-0.675128	-0.217502	0	-0.659753	-0.516632	-0.58029	-0.546419	-0.480409	-0.654664	-0.524502	-0.650215
367	yaiO	0.0172148	0	-0.0012939	0	0	0	0	0	0	0	-0.160539	0	0	0	0	-0.0102158	0	0	0	0	0	0	0	0	0.124126	-0.385733	0	0	0	0	0	-0.0143767	0	0	0	0	-0.056455	0	0	0	0	0	0	0	0
368	yaiX	0.190349	0	0	0	0	0	0	0	0	0	0	0	0	0	0	0	0	0	0	0	0	0	0	0	0	0	0	0	0	0	0	0	0	0	0	-0.0476006	0	0	0	0	0	0	0	0	0
369	insC1	0.0788775	-0.190778	-0.250452	0	0	-0.141869	-0.151519	-0.171015	-0.185812	-0.180863	-0.101624	0	-0.374449	-0.151519	-0.337264	-0.82832	0	-0.132283	0	-0.171015	-0.20578	-0.326293	-0.457798	0	0	0	-0.47587	-0.103901	-0.667489	-0.156368	0	-0.258279	-0.342781	-0.215869	-0.241404	0	-0.456251	-0.226029	-0.241404	-0.246566	-0.312696	-0.146686	-0.22094	-0.190778	-0.416491
370	insD1	0	0	0	0	0	0	0	0	0	0	0	0	0	0	0	0	0	0	0	0	0	0	0	0	0	0	0	0	0	0	0	0	0	0	0	0	0	0	0	0	0	0	0	0	0
371	yaiX	0	-0.437471	-0.535591	-0.931018	-0.334147	-0.545972	-0.574908	-0.580469	-0.574908	-0.388341	-0.544497	-0.747462	-0.437471	-0.563714	-0.505842	0	-1.03859	-0.604137	-0.7104	-0.563714	-0.55252	-0.563125	-0.545972	-0.571763	-1.08696	-0.673431	-0.231262	-0.742483	0	-0.574908	-0.720695	-0.602899	-0.339977	-0.563714	-0.437471	-0.656283	-0.20762	-0.563714	-0.399535	-0.563714	-0.437471	-0.574908	-0.593565	-0.55252	-0.508126
372	yaiP	-0.0255858	0	-0.416455	-0.725846	0.0676671	-0.348992	-0.175375	-0.142012	-0.175375	-0.294778	0	0	0	-0.242539	-0.589773	-0.262663	-0.0128944	0	-0.242539	-0.242539	-0.309703	-0.246075	-0.348992	-0.0131711	-0.560667	-0.417168	-1.23725	0	0	-0.175375	2.55374	-0.0649368	0	-0.242539	0	-0.180351	-1.01996	-0.242539	-0.227614	-0.242539	0	-0.175375	-0.0634348	-0.309703	-0.576068
373	yaiS	0.0422509	-1.05377	-0.769257	-0.236556	-0.596889	-0.745439	-0.976933	-0.705726	-1.01123	-0.909262	-0.541591	-0.829603	-0.767089	-0.891112	-0.63317	-0.207875	-0.198389	-0.923848	-0.886279	-0.910608	-0.859552	-1.06137	-1.06137	-1.0025	-0.135392	-0.826715	0	-0.0157069	-0.509149	-0.981782	0.738699	-0.907449	-0.836495	-0.955462	-0.919758	-0.827172	-0.353253	-0.965622	-1.05562	-0.986159	-0.915967	-0.972099	-0.856056	-0.84455	-0.0632415
374	tauA	-0.114881	0	0	-0.0325998	0	0	0	0	0	0	0	0	0	0	0	0	0.0946294	0	0	0	0	0	0	0.0196665	0.0491416	0	0	0	-0.00416993	0	0.907476	0	0	0	0	0	-0.440632	0.212204	0	0	0	0	0	0	0
375	tauB	-0.218679	0	-0.00243584	0	0	0	0	0	0	0	0	0	0	0	0	0	0.126464	0	0	0	0	-0.0526402	0	0.463225	0.302146	0.306103	0.206865	-0.0698925	0	0	0	0	0	0	0	0	0	0.695628	0	0	-0.0511594	0	0	0	0
376	tauC	-0.0219635	0.383761	0.104768	0.0525093	0.255106	0.219263	0.273628	0.199017	0.384766	0.135474	0.334173	0.376707	0.101056	0.327275	0.394465	0.0744363	0.0335397	0.227063	0.475459	0.199017	0.136699	0.190388	0.708118	0	0	0.280342	0.604976	0	0.022255	0.209191	0	0.328718	0.148446	0.172369	0.159702	0.277684	0.141846	0	0.252908	0.175974	0.0624293	0.215917	0.135746	0.216049	0.310938
377	tauD	-0.00104046	0.847888	0.971148	1.02591	1.14551	0.960066	1.00643	0.938707	0.974388	1.06306	0.795575	0.761214	1.20256	0.859245	0.750099	0.649368	0.509094	0.962993	0.933635	0.938707	1.00483	0.786747	0.609961	0.996357	0.758574	1.01991	1.00457	0.688082	0.463416	0.94944	0.987082	0.781302	1.03938	0.889637	0.852715	0.86785	0.77285	0.836894	0.836202	0.732171	0.926483	0.956536	0.959328	0.813765	0.880953
378	hemB	-0.118435	0	0	0	0	0	0	0	0	0.0225865	0	0.0874656	0	0.0921659	0.18763	0	0	0.00679469	0	0	0	0	0	0	0	0.225632	0.0327137	0.101522	0.0339828	0	0	0.0109174	0.0423087	0.0268619	0.057057	0	0	0	0.0211477	0.402572	0	0	0.0570358	0.183165	0
379	yaiT	-0.392269	1.14448	1.08351	1.22073	0.841085	1.19339	1.18374	1.16424	1.14944	1.14686	1.07309	1.32944	0.960807	1.15302	0.935448	0.893769	0.662814	1.20071	1.18857	1.16424	1.12948	0.554208	1.73911	0.865435	0.0583733	0.992646	0.848482	0.197514	0.583079	1.17889	1.05203	1.05896	0.978372	1.11043	1.07483	1.04672	1.6842	1.10923	1.0868	0.954499	1.02256	1.18857	1.0953	1.08342	0.918765
380	insF1	0	-0.275886	-0.136854	-0.132963	-0.479278	-0.226977	-0.236627	-0.256123	-0.27092	-0.165971	-0.347271	-0.295099	-0.359557	-0.236627	-0.222372	-0.105731	-0.768878	-0.217391	-0.231794	-0.256123	-0.290888	0.454754	0	-0.0964323	0.700611	-0.352508	-0.560978	-0.51352	-0.35769	-0.0414762	-0.368333	-0.357763	-0.269393	-0.200977	-0.126512	0	0	-0.311137	-0.326512	-0.331674	-0.0808111	-0.231794	-0.206048	-0.175886	-0.343103
381	insE1	0	0	0	0	0	0	0	0	0	0	0	0	0	0	0	0	0	0	0	0	0	0	0	0	0	0	0	0	0	0	0	0	0	0	0	0	0	0	0	0	0	0	0	0	0
382	yaiT	0	0	0	0	0	0	0	0	0	0	0	0	0	0	0	0	0	0	0	0	0	0	0	0	0	0	0	0	0	0	0	0	0	0	0	0	0	0	0	0	0	0	0	0	0
383	yaiV	0.000181517	-1.51186	-1.37283	-1.56894	-1.09826	-1.46295	-1.4726	-1.4921	-1.30689	-1.50195	-1.06625	-1.43107	-1.17854	-1.4726	-1.25835	-0.22311	0	-1.45337	-1.26777	-1.2921	-1.32686	-1.64738	0	-1.7909	-0.980362	-1.38848	-1.59695	-0.262227	-1.95126	-1.47745	-1.40431	-1.15492	-1.66386	-1.53695	-1.56249	-1.40962	-1.17882	-1.54711	-1.36249	-1.56765	-1.63378	-1.26777	-0.708038	-1.11186	-0.956196
384	ampH	-0.00393193	0	0	0	0	0	0	0	0	0	0	0	0	0	0	-0.231682	-0.438032	0	0	0	0	0	0.595316	0	0	0	0	0	-0.758893	0	0	-0.0646918	0	0	0	0	-0.0349794	0	0	0	0	0	0	0	0
385	sbmA	0.141603	0.724387	0.652354	0.464514	0.643217	0.771412	0.76276	0.744151	0.723394	0.734303	0.597322	0.603676	0.641401	0.76276	0.689012	0.278691	0.0835063	0.780006	0.767093	0.737078	0.692025	0.699983	0.612293	0.63389	0.450005	0.605503	0.651144	0.460923	-0.127104	0.732762	0.550418	0.619791	0.638069	0.683761	0.664932	0.733272	1.39411	0.689136	0.665665	0.841507	0.572576	0.767093	0.885132	0.718941	0.498674
386	yaiW	0	0	0.0181547	0.486634	0	0	0	0	0	0	0.22169	0	0.0469187	0	0	-0.161009	0	0	0	0	0.0773652	0	0	0.151545	0	0.0812273	0	0	0	0.11716	0	0.102235	0.20442	0.0699087	0	0	-0.0389443	0	0	0	0.0999521	0	0	0	0
387	yaiY	0.129631	-0.0284676	0	0	-0.20434	0	0	-0.0111747	0	-0.0186513	0	-0.131589	0	0	-0.066799	0	-0.299896	0	0	0	-0.0033371	-0.147891	-0.0985195	-0.11013	-0.212843	0	0	-0.131521	-0.262156	0	0.366852	-0.0914883	0	0	0	-0.068353	-0.0144816	-0.0572287	-0.134431	-0.139592	0	0	0	0	-0.183212
388	yaiZ	0	0	0.0632765	0.0518989	0	0.0169655	0.00798091	0	0.053639	0	0.0577469	0.0134843	0	0.00798091	0	0	0	0.0258905	0.0124807	0.0636519	0.00151018	0	0	0	0	0.217908	0.415298	0.0599623	0	0	0	0	0	0	0.0794668	0.0401978	0	0	0.0728644	0.0287964	0.069137	0.0124807	0.281836	0.0490152	0
389	ddlA	0	-0.165967	0	-0.0763035	-0.316256	-0.15758	-0.162523	-0.165967	-0.180088	-0.193332	-0.142433	0	-0.254719	-0.162523	-0.322221	-0.202118	-0.230394	-0.15267	-0.160047	-0.0512852	-0.0841437	0	-0.0921363	-0.0659673	-0.251351	0	0.419333	0	0	-0.165007	1.36414	-0.243504	-0.223052	-0.195483	-0.121674	0	0.0598699	-0.215967	0	0	-0.0338818	-0.169813	0	-0.213906	-0.192069
390	iraP	-0.287966	-0.0554243	0.00853559	-0.0444477	-0.147483	-0.0129779	-0.0212158	-0.0381315	-0.0504905	0	0	0.00684903	0	-0.0212158	0.238338	-0.0914496	0.120043	-0.00479468	-0.01709	0.012127	0.0543395	0.0097967	-0.0818613	-0.137086	0	-0.112103	0	-0.180398	-0.0420982	-0.0253556	-0.127928	0.0182573	0	-0.0761491	0	0.103594	0	-0.000852145	0.223113	0	-0.0283969	0	0	0	0.125661
391	phoA	-0.0151515	0	0.0582663	-0.145844	0	0.0716477	0.0676044	0.211615	0.0532359	0.0823896	0.343549	0.138093	0.16209	0.0676044	0.435624	-0.205636	-0.403962	0.0756642	0.0696295	0.0493734	0.00513431	-0.0539143	-0.130845	0.712464	0.293601	0	-0.036824	0.363318	0.498478	0.0655726	0	-0.000276356	-0.0704024	0	0.178254	0.397681	0.023833	0.0895704	0.0269165	0.149394	-0.0213855	0.221809	0.275848	0	0
392	psiF	0	0.105187	0.348011	0.238197	-0.0019243	0.070635	0.0639068	0.0676982	0.0399972	0.0109519	0	0.100666	0	0.0639068	0.0427037	0	-0.00726255	0.0773185	0.0672765	0.052687	0.0302854	0.0179514	0	0	0	0.0400949	0.0402525	0	0	0.0605257	0.16519	0.0337915	0.0699931	0.0854894	0.0232642	0.0849015	0	0.148135	0.0263792	0.00352542	0	0.0846609	0.0477012	0.106805	0.16364
393	yaiC	-0.118455	0	0	0.228241	0	0	0	0	0	0	0	0	0	0	0	0.286504	-0.110217	0	0	0	0	0	0	0	0	0	0	0.322816	0.483717	0	0.228466	0.0139106	0	0	0	0	0	0	0	0.240886	0	0	0	0	0.0225619
394	proC	0	0.625441	0.406986	0.555675	0.271792	0.598862	0.592959	0.575617	0.571982	0.663019	0.592865	0.413832	0.396032	0.592959	0.629629	0.0777991	0.0279533	0.604726	0.595916	0.575616	0.552892	0.437046	0.482714	0.500417	0.504176	0.582207	0.446094	0.293957	0.167242	0.589993	0.403942	0.548099	0.687407	0.605216	0.519986	0.736837	0.475336	0.470231	0.530142	0.439175	0.444686	0.5905	0.529336	0.619374	0.322332
395	yaiI	0.116614	0	0	0	0	0	0	0	0	0	0	0	0	0	0	0	0.385971	0	0	0	0	0	0	0	0	0	0	0	0	0	0	0	0	0	0	0.0269528	0	0	0	0	0	0	0	0	0
396	aroL	0.148004	0.822827	0.673112	0.609805	0.876954	0.863287	0.859086	0.852436	0.844158	0.816452	0.715373	0.898861	0.663659	0.859086	0.590099	0.571846	0.267976	0.86746	0.86119	0.843337	0.766369	0.803255	0.766454	0.837212	0.656231	0.788239	0.587192	0	0.756975	0.856975	0.96167	0.624063	1.26913	0.742131	0.683204	0.786926	0.309995	0.785277	0.822615	0.850161	0.485788	0.863027	0.693187	0.753457	0.637709
397	yaiA	0	0	0	0	0	0	0	0	0	0	0	0	0.355929	0	0	0	0	0	0	0	0	0	0	0	0	0	0	0	0.178635	0	0	0	0	0	0	0	0	0	0	0	0	0	0	0	0
398	aroM	0.837851	0.0968453	0.438181	0.0610593	0.00873876	0.133679	0.127208	0.114521	0.104211	0.101244	0.19009	0.0915079	0.332243	0.127208	0.516188	0.347719	0	0.140108	0.130449	0.107241	0.234169	0	0	0	0	0.045204	0.132442	0.566626	0	0.123956	0	0.30599	0	0.223225	0.353931	0.0924136	0	0.0287135	0.0674909	0.0703016	0.600665	0.130836	0.36788	0.240136	0.242987
399	yaiE	0	-0.0828316	0	-0.104912	0	-0.124831	-0.134481	-0.153977	-0.0778653	-0.0197377	-0.0633071	-0.0726467	0	-0.0435721	0	0	-0.564874	-0.115245	-0.129648	-0.0098899	-0.00692464	0.341673	0.0434621	-0.270965	-0.377416	-0.159453	-0.314744	0	-0.000432391	-0.139331	-0.266187	0	-0.143926	0	0	0	0	-0.208992	-0.0802792	-0.229528	0	-0.129648	0	-0.0828316	0
400	ykiA	0	0	0	0	-0.155891	0	0	0	0	0	0	-0.038489	0	0	0	0	0	0	0	0	0	0	0	0	0	0	0	0	-0.0926089	0	0	0	0	0	0	0	0.516277	0	0	0	0	0	0	0	0
401	rdgC	-0.00215166	0	0	0	0.138182	0	0	0	0	0	0.0132978	0.0942017	0	0	0	0	0.229298	0	0	0.101912	0	0	0	0	0	0	0	0	0	0	0.201567	0.330545	0	0	0	0	0.816095	0.756546	0	0	0.247957	0	0	0	0
402	mak	-0.0540078	-0.490953	-0.551921	-0.49803	-0.0615544	-0.60871	-0.61836	-0.554523	-0.520573	-0.564371	-0.479004	-0.403842	-0.674624	-0.61836	-0.637439	-0.609581	-0.185015	-0.599124	-0.613527	-0.47119	-0.589288	-0.626468	-0.674639	-0.936662	-0.577699	-0.518827	-0.643964	-0.745168	-0.561752	-0.456543	-0.402572	-0.274083	-0.594209	-0.516044	-0.458246	-0.50538	0	0	-0.708246	-0.713407	-0.299963	-0.613527	-0.604448	-0.65762	-0.619172
403	araJ	0.0217631	-1.06872	-0.474694	-1.04008	-0.46642	-1.01981	-1.02946	-1.04896	-1.06375	-1.05881	-0.913682	-1.04508	-0.966677	-1.02946	-1.21521	-0.777485	-0.782017	-1.01022	-1.02463	-1.04896	-0.940866	-1.20424	-0.634756	1.18722	0.156661	-1.14534	0.0411698	-1.26756	-1.14618	-1.03431	-0.791886	-0.722026	-0.9943	-0.808097	-0.750066	-1.16648	-1.24779	-1.10397	-0.976489	-0.121313	-1.19064	-1.02463	-1.09888	-1.06872	-1.00872
404	sbcC	0	0	0	0	0	0	0	0	0	0	0	0	0	0	0	0	0	0	0	0	0	0	0	0	0	0	0	0	0	0	0	0	0	0	0	0	0	0	0	0	0	0	0	0	0
405	sbcD	-0.00602498	0.582615	0.450218	0.581606	0.648503	0.560096	0.550445	0.530949	0.501615	0.521101	0.439801	0.71947	0.541801	0.693303	0.3647	0.225506	0.114414	0.569682	0.555279	0.530949	0.567612	0.4471	0.387023	1.02239	0.26855	0.434565	0.0314982	0.36627	0.325415	0.617025	0.41874	0.572166	0.573469	0.557524	0.531989	0.413426	0.260686	0.547364	0.46056	0.598255	0.532126	0.66849	0.481024	0.511186	0.499759
406	phoB	-0.0366534	0	0	0	0	0	-0.000250942	-0.0197471	0.223561	-0.0295949	0	0	0	0	0	-0.387713	0	0	0	-0.0197471	0	0	-0.193823	-0.151886	-0.258337	-0.0280782	0.340544	0	0.135423	0	-0.0764011	-0.0102763	0	-0.0646014	-0.0345809	-0.13727	0	0	-0.0345809	0	0	0	0	0	-0.0660586
407	phoR	0.0394917	0.280234	0.236686	0.203751	0.167645	0.35328	0.308277	0.294351	0.134103	0.287317	1.00648	0.445082	1.23277	0.308277	0.324551	0.30799	-0.150451	0.322017	0.311729	0.437208	0.269518	0.147723	0.204017	0.191995	0.0855436	0.154076	0	0.746128	0.680161	0.269098	2.17691	0.221751	0.583194	0.262312	0.227373	0.0614796	-0.000117965	0.223361	0.172644	0.204671	0.182453	0.311729	0.437261	0.280234	0.0786574
408	brnQ	-0.162011	0.0724082	0.0201499	0.030628	0	0	0.106059	0.0893482	0.0785778	0.0809072	0.201718	0.220226	0	0.106059	0	0.237013	-0.00452474	0.122547	0.110202	0.160777	0.0595492	0.0633954	-0.0287226	0	0	0.221019	-0.156636	0	-0.341393	0.209045	0	0.00222795	0	0.0509017	0.0791142	0.435392	-0.0523199	0.137275	0.2433	0.131733	0	0.110202	0.0108408	0.0724082	0
409	proY	-0.117698	-0.112096	-0.101636	-0.0120302	-0.272631	0.536265	-0.0728367	-0.0923329	0.0188891	-0.0307521	0	-0.159881	-0.15291	-0.0728367	0.110698	-0.378988	-0.0997387	-0.0536005	0	-0.0209043	-0.127098	0	-0.301532	0.192428	-0.211875	-0.117289	0.0504401	0.170395	-0.308972	-0.0776861	-0.133114	-0.0807616	-0.150888	-0.0239755	0.177468	0	-0.137099	0.0375226	-0.0198651	-0.167884	0.335792	-0.0680036	-0.142258	-0.112096	0.1029
410	malZ	0.00226261	0	0	-0.695385	-0.2417	-0.389399	-0.399049	-0.418545	-0.433342	-0.428393	-0.00969289	-0.557521	-0.621979	-0.399049	-0.584794	-1.20451	-0.655811	-0.379813	0	-0.418545	-0.45331	-0.573823	-0.705328	-0.717351	-0.323801	-0.51493	-0.2234	-0.190467	0.734929	-0.403898	-0.530755	-0.520185	-0.590311	0.202117	-0.488934	-0.0360683	-0.260236	-0.473559	-0.488934	-0.494096	0.583444	-0.394216	-0.46847	-0.438308	-0.664021
411	acpH	0.0744877	0.125371	0.286625	0	0.287598	0.17428	0.340737	0.145134	0.130337	0.246397	0.0539862	0.117269	0.163922	0.16463	0	-0.0256601	0.346144	0.183866	0.280575	0.256245	0.110369	0.100967	0.034505	0.49159	0.522588	0.270972	0	0.0739024	-0.0171985	0.159781	0.0329246	0.154605	0.0844788	0.253929	0.185856	0.138722	0.136776	0.266227	0.623386	0.0534559	0.297623	0.169463	0.0952088	0.125371	0.0107691
412	queA	0.149675	-0.169336	-0.230304	-0.09308	0.197194	-0.120427	-0.130077	-0.149573	-0.16437	-0.159421	-0.240721	-0.28855	-0.019674	-0.130077	-0.315822	-0.931259	0	-0.110841	-0.125244	-0.149573	-0.184339	-0.304851	0.207307	-0.115045	0	-0.245958	-0.121094	-0.749126	-1.04127	-0.134926	-0.261783	0	0	-0.194427	-0.219962	0	-0.157931	-0.204587	0.0311134	0.0725719	0.176998	-0.125244	-0.199498	-0.169336	-0.0617158
413	tgt	0	0	0	0	0	0	0	0	0	0	0	0	0	0	0	0	0	0	0	0	0	0	0	0	0	0	0	0	0	0	0	0	0	0	0	0	0	0	0	0	0	0	0	0	0
414	yajC	-0.141646	1.19665	1.03819	0.842081	0.629099	0.981401	0.971751	0.952254	0.937457	0.942407	0.861106	0.813278	0.74882	1.13842	1.3835	0.986795	0.380584	0.990987	0.976584	0.952254	0.917489	0.796976	0.665471	0.653449	0	0.85587	0.814066	1.01937	0.0207664	0.966901	0.840045	0.850614	0.780488	0.9074	1.04853	0.834731	0.77723	0.89724	0.881865	0.876703	1.19756	0.976584	0.902329	0.932491	0.970939
415	secD	0.0490844	-0.548188	-0.609156	-0.305265	-0.85158	-0.499278	-0.508928	-0.528425	-0.543222	-0.538272	-0.619573	-0.667401	-0.231859	-0.508928	-0.194674	-0.327218	0.573464	-0.489692	-0.504095	-0.528425	-0.56319	-0.683703	-0.315208	-0.82723	3.76782	-0.624809	-0.333279	-0.168829	-0.298949	-0.513778	-0.640634	-0.630065	-0.700191	-0.573279	-0.598814	-0.645948	0	-0.583439	-0.598814	-0.603976	0	-0.504095	-0.57835	-0.548188	0
416	secF	0	0	0.109819	0	0.261513	0	0	0	0	0	0	0	0	0	0	0	0	0	0	0	0	0	0.858797	0.885695	0	0.0614914	0.612877	0	-0.228879	0	0	0	0	0	0	0.492705	0.133816	0	0.103059	0	0	0	0	0	0.385737
417	yajD	0	0.796809	0.890183	0.706399	0.39857	1.01239	0.836069	0.816573	0.801776	0.973391	0.725425	0.677596	0.613138	0.836069	0.81699	0.738101	0.550986	0.855305	0.840902	0.816573	0.781807	0.661294	0	0	0.744649	0.658697	0	0.701502	0	0.831219	0.704363	0.881599	0.644806	0.771718	0.746183	0.373011	0.674399	0.761558	0.643125	0.907688	0.674892	0.840902	0.766647	0.796809	0.44952
418	tsx	-0.790866	1.03922	0.877249	0.904805	1.1865	0.881964	1.05063	1.05468	1.40886	0.877259	1.07649	1.03086	1.10284	1.04085	0.837889	0.332237	0.344468	1.04664	1.04963	0.960885	1.07343	1.08631	3.01576	3.55529	0.721377	1.20676	3.59365	2.90626	0.539227	1.05082	1.10946	0.856907	1.08142	0.98751	1.01592	1.13539	0.823124	1.11519	1.17561	0.656159	1.08718	1.04963	0.99306	1.0606	0.995923
419	yajI	0.293455	1.06608	0.979149	0.969325	0.647253	1.03785	1.03184	1.01971	0.957148	1.05196	0.954258	1.09115	0.875217	1.06118	1.17007	1.02607	0.857856	1.04381	1.03485	1.30109	0.963437	0.924819	0.954505	0.5778	1.01961	0.686452	0.939791	1.08832	0.721312	1.03129	0.855368	1.11302	0.93948	1.22121	1.13599	1.26299	0.982001	0.838169	0.863018	1.71526	0.922201	1.03485	1.20456	1.00195	1.17497
420	nrdR	0	0	0	0	0.580847	0	0	0	0	0	0	0	0	0	0	0	0	0	0	0	0	0	0.190116	0.770863	0	0	0.0298229	0.0427045	0	0	0	0.018669	0	0	0	0.127324	0	0	0	0	0	0	0	0	0
421	ribD	0.0811089	0.0748649	0.179279	0.0923731	0.0192476	0.217383	0.215086	0.210446	0.238025	0.386213	0.449968	0.0887784	0.290644	0.149647	0.022645	0	0	0.219664	0.216236	0	0.235475	0.16958	0.0121872	0	0	0.826114	0.648792	0	0	0.208439	0.379831	0.0200441	0.110059	0.226448	0.100295	0.0167157	0.124664	0.481986	0.366652	0	0.373358	0.216236	0.2004	0.217922	0
422	ribE	0	0.74204	0.667958	0.544396	0.608843	0.705233	0.70181	0.694894	0.706333	0.52903	0.973193	0.593585	0.966101	0.728888	0.556722	0.299167	0.471906	0.708633	0.703524	0.641696	0.68356	0.641432	0.46312	0.307207	0.447545	0.24524	0.0988505	0.232598	0.0412782	0.702363	0.828901	0.652071	0.658589	0.73691	0.619903	0.444713	0.44582	0.572379	0.624867	0.25551	0.504159	0.703524	0.513863	0.682844	0.490809
423	nusB	0	0.41617	0.257307	0.367607	0.22567	0.2906	0.286585	0.278473	0.24585	0.0511614	0.0100628	0.29479	0	0.359545	0.335531	0.143478	0	0.294589	0.288596	0.477059	0.397648	0.218222	0.35632	0.525917	0.816674	0	0.313069	0.248794	0.388236	0.290691	0.0703557	0.560956	0.273349	0.138111	0.328687	0.461643	0.271906	0.109003	0.397042	0.861148	0.3172	0.288596	0.377162	0.256669	0.395381
424	thiL	0.170629	0	0	0	0	0	0	0	0	1.16826	0	0	0	0	0	0	0	0	0	0	0	0	0.351212	0	0	2.28622	0	0.729157	0	0	0.131233	0	0	0	0	0	0.0550701	0	0	0	0.2943	0	0	0	0
425	pgpA	0	0.19965	0.133717	0.411896	0.137197	0.265217	0.259628	0.248336	0.241587	0.635807	0.355241	0.199727	0.146443	0.241007	0.140605	0	0	0.270768	0.262427	0.221275	0.203141	0.127419	0.228785	0.21983	0.236678	0.636225	0.739584	0	0.465029	0.213285	0.15129	0.1576	0.177246	0.474017	0.201353	0.226979	0.339582	1.68328	0.0255389	0	0.439192	0.262427	0.41296	0.333422	0.19395
426	yajO	-0.092037	0.260309	0.322938	0.0687735	0.276947	0.261344	0.256097	0.245497	0.236203	0	0.159158	0.494759	0.345271	0.268876	0.155728	0.172059	-0.435603	0.266556	0.258725	0.264068	0.243793	0.102085	0	0.167167	0.772864	0	0	0.525647	0	0.420592	0.356217	0.285494	0.40061	0.0462993	0.209532	0.286799	0	0	0.475045	0.686801	0.127429	0.258725	0.0834987	0.168504	0.192371
427	dxs	-0.258616	0.0133674	0	0.251113	-0.175035	0.0456264	0.0386852	0.024662	0.013876	0	0	0	-0.055314	0.0401456	-0.018129	-0.00443199	-0.272726	0.0525215	0.0421616	0.0267844	0.00162135	1.95866	-0.138663	-0.150685	0.53296	0	0.55461	-0.784766	-1.03337	0.254298	0	0	-0.0236461	0	0	0.152153	-0.193571	0	0.452585	0	0	0.0421616	0	0.00287551	0.598545
428	ispA	0.430036	0.190336	0.364364	0.0773463	0	0.239245	0.229595	0.210099	0.195302	0.200251	0.118951	0.252941	0.00666479	0.229595	0.316577	0.0476698	0.0432474	0.248831	0.234428	0.301008	0.175334	0.14573	-0.076684	0.0022026	0.0159269	0.257802	-0.0947555	0	0	0.224746	0.188799	0.199368	0.31106	0.165245	0.13971	0.0925757	0.232044	0.155085	0.283797	0.134548	0.0684184	0.234428	0.160174	0.190336	0
429	xseB	0.147738	0	0	0	-0.101405	0	0	0	0	0	0	0	0	0	0	0	-0.124908	0	0	0	0	0	0	-0.0770555	0	0	0	-0.265791	-0.320853	0	0	0	0	0	0	0	0	0	0	0	0	0	0	0	-0.073726
430	thiI	0.160622	0.41573	0.36723	0.176932	0.17709	0.446866	0.440722	0.424481	0.418892	0.358283	0.370287	0.238784	0.525949	0.440722	0.258719	0.511563	0.0313633	0.452968	0.443799	0.428311	0.40618	0.40052	0.284497	0.154875	0.045261	0.367938	0.426437	0	-0.0914794	0.437635	0.433795	0.488906	0.444301	0.399757	0.516742	0.430412	0.396944	0.183507	0.327055	0.374358	0.265075	0.443799	0.399247	0.409872	0.347136
431	yajL	0	0.526111	0.503668	0.69321	0.409557	0.558104	0.551792	0.545933	0.52936	0.647363	0.479417	0.630031	0.597109	0.551792	0.545057	0.151359	0	0.564375	0.554953	0.539039	0.516298	0.509562	0.281695	0.493374	0.699068	0.474218	0.458061	0.429892	0.131952	0.54862	0.527191	0.711401	0.51807	0.509699	0.453163	0.523715	0.380456	1.08066	0.594599	0.500163	0.57784	0.554953	0.501489	0.536655	0.243297
432	panE	-0.27331	0.307817	0.207102	0.250104	0.682204	0.324125	0.320907	0.143091	0.309473	0.223933	0.284014	0.129874	0.535989	0.320907	0.171783	0	0	0.327322	0.322519	0.314407	0.302815	0.405739	0.540325	0.429645	0	0.266977	0.122779	0	0	0.31929	0.32917	0.152047	0.286644	0.299451	0.391869	0.327398	0.250088	0	0.383357	0.380145	0.324095	0.322519	0.255565	0.398746	0.529907
433	yajQ	-0.0106683	1.30326	1.35202	0.867761	1.03597	1.30622	1.30564	1.48798	1.30356	1.30021	1.29894	1.29027	0.890316	1.30564	1.29075	1.20123	1.39345	1.3068	1.30593	1.30446	1.30235	1.03129	1.07732	0.847308	1.15299	1.32067	1.28226	0.986745	0.874363	1.30534	1.16497	1.22069	1.16042	1.30174	1.35094	1.16465	1.15099	1.21971	1.2157	1.16881	1.08449	1.30593	1.36226	1.17218	1.2631
434	yajR	0.0712988	0.48258	0.607302	1.00262	0.336786	0.52838	0.519343	0.526455	0.487231	0.502409	0.415734	0.387658	0.582564	0.519343	0.355951	0	0	0.537357	0.523869	0.501087	0.468532	0.673259	0.505281	0.751524	0.203004	0.384521	0.226495	0.0586948	0.32328	0.514802	0.557143	0.511119	0.504114	0.459084	0.399711	0.552167	0.342562	0.425554	0.568182	0.586785	0.626919	0.523869	0.381738	0.639026	0.338271
435	cyoE	0	0	0	0.0118884	-0.0248443	0	0	0	0	0	0	0	-0.0873887	0	0	0.0995182	-0.230936	0	0	0	0	0	-0.0802232	-0.241941	-0.0450989	-0.115066	-0.153532	0.193004	0.0016265	0	0	0	0	0	-0.0440986	-0.0042007	-0.00364336	-0.0736955	0	-0.00398663	0	0	0.073853	0	0.249872
436	cyoD	-0.218214	0	0	0.0133516	0.222997	0	0	0	0	0	-0.195031	-0.0206377	0	0	0	0	0	0	0	0	0	-0.0369395	0	-0.0658313	0	0.168167	0	-0.000999548	-0.165686	0	-0.104982	0.924704	0	0	0	-0.220007	0	0.838449	0	0	0	0	0.242483	0	0
437	cyoC	0	-0.170624	-0.131592	0	0.163093	-0.121714	-0.131365	-0.150861	-0.165658	-0.160708	0	0	-0.336817	-0.131365	-0.31711	-0.291157	-0.543732	-0.112128	-0.126531	-0.0508607	-0.185626	0	-0.0631028	-0.0901167	-0.447097	0	-0.425009	0.00397611	-0.0854144	-0.136214	0	0.124704	-0.222627	-0.195715	-0.11243	0	-0.391823	0.10489	-0.22125	-0.225614	-0.292541	-0.126531	0	-0.170624	-0.196337
438	cyoB	0	0	0	0	0	0	0	0	0	0	0	0	0	0	0	0	0	0	0	0	0	0	0	0	0	0	0	0	0	0	0	0	0	0	0	0	0	0	0	0	0	0	0	0	0
439	cyoA	-0.158372	0.373864	-0.187104	-0.383213	0.0704715	-0.0772268	-0.086877	2.08979	-0.12117	-0.116221	-0.197521	-0.24535	-0.309807	-0.086877	0.227378	-0.905166	-1.13612	-0.0676407	0.417956	-0.106373	-0.141139	-0.261651	-0.393156	0.0948213	3.21398	1.92121	-0.411228	0.253222	-0.0378612	-0.0917264	-0.218583	-0.208013	-0.278139	-0.151227	-0.176762	-0.223896	0.0519355	-0.161387	-0.176762	-0.181924	-0.248054	-0.0820438	-0.156298	-0.126136	0.648151
440	ampG	0.317839	-0.687944	-0.748912	-0.29878	-0.741336	-0.639034	-0.398684	-0.66818	-0.682977	-0.678028	-0.509328	-0.807157	-0.621615	-0.648684	-0.83443	-0.570733	0.240794	-0.629448	-0.643851	-0.66818	-0.202946	-0.823459	-0.308723	-0.966986	-0.492955	-0.514565	-0.973035	0.337656	0.0890535	-0.653534	-0.28039	-0.519821	-0.339947	-0.713035	-0.48857	-0.139463	-0.613631	1.68687	-0.48857	-0.743731	0.32103	-0.643851	-0.468106	-0.687944	-0.413656
441	yajG	-0.375702	-0.995017	-0.0559846	-0.252094	-1.29841	-0.946107	-0.955757	-0.975253	-0.99005	-0.985101	-1.0664	-1.11423	-0.178688	-0.955757	-1.1415	0.225954	1.16492	-0.936521	-0.950924	-0.975253	-1.01002	-1.13053	-1.26204	-1.27406	-1.38051	-1.07164	-1.28011	-0.908139	-1.40674	-0.960607	-1.08746	-1.07689	-1.14702	-1.02011	-1.04564	-0.0927766	-1.31694	-1.03027	-1.04564	-1.0508	-1.11693	-0.950924	-1.02518	-0.995017	-0.220729
442	bolA	0	0	0	0	0	0	0	0	0	0	0	0	0	0	0	0	0	0	0	0	0	0	0	0	0	0	0	0	0	0	0	0	0	0	0	0	0	0	0	0	0	0	0	0	0
443	tig	0	0	0	0	0	0	0	0	0	0	0	0	0	0	0	0	0	0	0	0	0	0	0	0	0	0	0	0	0	0	0	0	0	0	0	0	0	0	0	0	0	0	0	0	0
444	clpP	-0.259431	1.54622	1.51066	1.33121	1.42775	1.57475	1.56913	1.55775	1.54912	1.55201	1.37958	1.56002	1.40462	1.56913	1.4418	0.798591	0.72116	1.58035	1.57194	1.75091	1.53747	1.59563	0.973796	1.4521	1.11302	1.50153	1.3032	0.901588	0.225851	1.5663	1.4923	1.64927	1.24922	1.53159	1.51669	1.4892	1.40922	1.52566	1.51669	1.51368	1.46637	1.57194	1.52863	1.54622	1.36257
445	clpX	-0.629849	0.0588879	0.0233232	0	0	0.0874185	0.0817892	0.0704165	0.0617849	0.0646719	0.392247	0.0726802	0	0.0817892	0	0.214932	0	0.0930104	0.0846086	0	0.0501366	0	0.48646	0	0.125684	0.0141922	0	0	0.530996	0.0789604	0.00496093	0	0.261886	0.0442515	0.029356	0.00186121	0	0.0383249	0.029356	0.026345	0	0.0846086	0.0412934	0.0588879	0
446	lon	0	0	0	0	0	0	0	0	0	0	0	0	0	0	0	0	0	0	0	0	0	0	0	0	0	0	0	0	0	0	0	0	0	0	0	0	0	0	0	0	0	0	0	0	0
447	hupB	-1.92363	3.11527	3.0543	2.85819	2.81188	3.16418	3.15453	3.13503	3.12023	3.12518	3.04388	2.99605	2.9316	3.15453	2.96878	2.33624	2.60528	3.17376	3.15936	3.13503	3.10027	5.95685	2.84825	2.83623	3.22977	3.03865	2.83018	3.70215	6.47699	3.14968	8.46605	3.03339	2.96326	3.09018	3.06464	3.51751	2.79334	3.08002	3.06464	3.05948	3.49335	3.15936	3.08511	5.54426	2.88955
448	ppiD	0.182238	1.46995	1.81204	1.22186	1.56858	1.52785	1.5182	1.9987	1.4839	1.48885	1.40755	1.35972	1.29527	1.5182	1.33245	0.699906	0.968952	1.53743	1.52303	1.4987	1.46393	1.34342	0.76907	0.988086	0.629231	0.623376	1.19384	0.565813	0.559995	1.51335	1.38649	1.89706	1.32693	1.45385	1.42831	1.88118	1.65701	1.44369	1.42831	1.42315	1.28813	2.02303	1.44877	1.47894	1.75322
449	ybaV	0	0	0	0	0	0	0	0	0	0	0	0	-0.0211853	0	0	-0.207135	0	0	0	0	0	0	0	-0.0862123	0.140448	0.131145	-0.183195	-0.0379745	0.00721587	0	0	0	-0.0548879	0	0	0	0	0	0	0	0	0	0	0	0
450	fadM	-0.0333025	0.0089876	0.105926	0	0.106963	0	0	0	0	0	0	0	0	0	0	0	-0.128771	0	0	0	0	0	0.442846	0	0.323764	0.647794	0	0	-0.454429	0	0	0	0	0	0	0	0	0	0	0	0.0688884	0	0	0	0
451	queC	0.00745504	-0.0531822	0	-0.322397	0	-0.228469	-0.237649	-0.183023	-0.270269	-0.19239	-0.269725	-0.31522	-0.0317477	-0.237649	-0.0788483	-0.321306	-0.23079	-0.219351	-0.233051	-0.256194	-0.216093	-0.41512	0	0.423616	0	-0.171587	-0.233805	-0.063047	-0.28675	-0.242261	-0.289759	-0.0905616	-0.223445	-0.29886	-0.145591	-0.148472	-0.142193	-0.308524	-0.323149	0	-0.317792	-0.159881	-0.303684	-0.274993	-0.343354
452	ybaE	0.321334	0.0496421	-0.217206	0	-0.126297	-0.0311725	-0.0377628	-0.0754675	-0.0611825	-0.0821928	-0.137715	-0.170378	-0.329327	-0.0377628	-0.276442	-0.494833	-0.560972	-0.0246259	-0.0344621	-0.0510773	-0.0992098	0.347099	0.000737433	-0.101947	-0.208398	0.100474	-0.363395	-0.715012	-0.0824049	-0.0410746	-0.152098	-0.207928	0	-0.0817094	0	-0.204508	-0.430769	-0.0886479	-0.099148	0.119309	-0.172225	-0.0588524	-0.0851726	-0.0645741	-0.2675
453	cof	0.112782	0.382358	0.26826	0.163385	0.160106	0.312925	0.306505	0.399026	0.283692	0.218315	0.271528	0.517067	0.229552	0.306505	0.335666	0	0.0969321	0.319302	0.302273	0.156197	0.274701	0.083444	0.312976	0.4092	0	0	0	0	0	0.303279	0.257517	0.00144145	0.568454	0.19162	0.565443	0.347028	0.109149	0.185089	0.285337	0.0059956	0.400304	0.309721	0.18836	0.284681	0.125323
454	ybaO	0	0.51908	0.667893	0.358922	0.467498	0.605422	0.602068	0.740386	0.590146	0.878562	0.577337	0.372108	0.596052	0.602068	0.410244	0.521894	0.26683	0.608755	0.712211	0.768681	0.540286	0.662163	0.377637	0.380992	0.601147	1.15294	0.892081	0.496175	0.874854	0.600382	0.570016	0.902798	0.27773	0.70047	0.41748	0.671694	0.64732	0.694664	0.584554	1.12057	0.882373	0.603748	0.697572	0.545501	0.744046
455	mdlA	-0.289878	0.0379649	0.0368201	0.385155	0.12704	0.0645333	0.0584864	0	0.036998	0.117352	0.0707009	0.0518253	0.16165	0.0584864	0.218401	-0.108321	0	0.07054	0.268014	0.200776	0.144657	0	0	0.0784102	0	0	0	0	0.00579216	0.0554477	0.0575035	0.0370005	0.250808	0	0.34171	0.0744971	0.0338796	0	0.0837084	0.0528362	0.219706	0.0615149	0	0.154058	0
456	mdlB	-0.121624	-1.37598	-1.2589	-1.49175	-0.886471	-1.32426	-1.34292	-1.18039	-1.37179	-1.09016	-1.44662	-1.31847	-1.5517	-1.34292	-1.38116	-1.04581	-0.908164	-1.31619	-1.17043	-1.34881	-1.22019	-1.20352	-1.50169	-1.01371	-1.52267	-1.47547	-1.03528	-0.619472	-0.258938	-1.35753	-1.49378	-1.26598	-0.955846	-1.40763	-1.41861	-1.19752	-1.28442	-1.05829	-1.09845	-0.789198	-1.17517	-1.32832	-1.40138	-1.20756	-1.56605
457	glnK	0	-0.15216	-0.220446	0	-0.324587	-0.168983	-0.114967	-0.207122	-0.147456	-0.222609	-0.15663	-0.212468	-0.199849	-0.114967	0	0	-0.456702	-0.159901	-0.120915	-0.196595	-0.176899	0.366831	0.270562	0.00558486	0	-0.0149431	0	0	0	-0.0564036	0	-0.303412	0	-0.112773	-0.200122	-0.224514	-0.0481305	-0.269767	-0.121072	-0.307122	-0.088508	-0.173546	-0.180735	-0.162687	-0.365994
458	amtB	-0.0546722	0	0	0	0	0	0	0	0	0	0	0	0	0	0.297528	0.778446	0	0	0	0	0	0	0.321413	-0.179248	0.27589	0.236306	0.671004	0	0.200776	0	1.29021	0	1.14797	0	0	0	0	0	0.0537161	0	0	0	0	0	0
459	tesB	-0.0425767	0.384702	0.265277	0.345239	0.171049	0.377573	0.391427	0.467634	0.360281	0.459238	0.285072	0.350246	0.44384	0.352298	0.246632	0.167094	0.0788077	0.405922	0.393642	0.372898	0.378673	0.135832	0	0.189283	0.334065	0.208528	0.780118	0.51992	0.177652	0.40893	0.0132129	0.201427	0	0.334653	0.29049	1.44407	0.336227	0.476145	0.292476	0.30848	0.346833	0.393698	0.33033	0.54552	0.237281
460	ybaY	-0.114062	0.978047	1.29956	0.781169	0.984479	1.28626	1.15699	1.13062	1.13967	1.12263	1.13339	1.01188	0.803561	1.3722	0.980419	0.821555	0.594192	1.18306	1.17139	1.15167	2.4287	1.18442	0.993087	1.00416	0.946608	0.934822	0.379673	0.408333	0	1.03405	0.948229	2.03573	0.935216	1.11531	1.21777	0.672011	0.766537	1.07371	1.07255	1.09043	1.01578	1.17107	1.1112	1.09354	1.04744
461	ybaZ	-0.054227	0.183325	0.0225166	0.0175525	0	0	0.0129351	0	0	0	0	0	0.308595	0	0	0	0.358238	0	0	0	0	0	0	0	0	0.103162	0.388402	0	0	0.159764	0.011631	0	0	0	0	0.302408	0	0	0	0	0	0	0	0	0
462	ffs	0	0	0	0	0	0	0	0	0	0	0	0	0	0	0	0	0	0	0	0	0	0	0	0	0	0	0	0	-0.190008	0	0	0	0	0	0	0	0	0	0	0	0	0	0	0	0
463	ybaA	0	0.0194594	0	0.193843	0	0.156653	0	0	0	0	0.129947	0.0131445	0	0.0579792	0	0	0	0	0	0	1.32488	0	0	0	0	0.113613	0	0	0	0	0.0422019	1.60685	0	0	0.130347	0	0.116074	0	0.296414	0	0	0.000675323	0	0	0
464	ylaB(pdeB)	-0.140962	0.0106404	0.0122971	0	0	0.137191	0.115262	0.242319	0.370379	0.232471	0.551926	0.604213	0	0.522108	0.302493	0.0985205	-0.242194	0.281051	1.42048	0.0994617	0	15.9488	15.9789	15.6405	15.5588	0.304791	0.279339	-0.688116	0	0.211319	0.459893	0.119355	0.21341	5.71308	0.203061	0.466965	0.253982	0.187305	0.203575	0.0239106	0.672067	0.349635	0.418817	0.222556	0
465	ylaC	-0.113266	-0.396675	-0.310194	-0.197919	-0.716948	-0.129385	-0.364553	-0.244141	-0.119884	-0.388562	-0.182353	-0.0962632	-0.421729	-0.364553	-0.334709	-0.149621	-0.454875	-0.0760873	0	-0.380505	-0.0453127	0	0	0	0	-0.285701	-0.474702	-0.00857805	-0.868441	-0.368521	0	0	-0.157404	0	-0.0877052	-0.113024	-0.216666	-0.0326136	-0.0269428	-0.442319	-0.132789	-0.176216	-0.421353	-0.396675	-0.444985
466	maa	-0.104462	0	0	0	0	0	0	0	0	0	0	0	0	0	0	-0.148173	0	0	0	0	0	-0.0630712	-0.506616	-0.51208	0.363924	-0.010953	0	0.475663	0.31246	0	0.33133	-0.241616	0	-0.0189016	-0.158951	0	0	0.384539	-0.00756134	0	0	-0.0502552	0	0	0
467	hha	-0.024105	0	0	0	0	0	0	0	0	0	0.0738653	0	0	0	0	0	0	0	0	0	0.130248	0	-0.417801	-0.426544	0	0	0	0.153965	0	0	0	0	0	0	0	0	0	0.143661	0	0	0	0	0	0	0
468	tomB	-0.0999958	-0.597649	-0.687444	-0.920978	-0.530123	-0.471169	-0.569097	-0.62873	-0.684946	-0.590438	-0.240474	-0.483666	-0.439635	-0.569097	-0.431457	-0.233795	-0.179698	-0.646016	-0.685781	-0.583276	-0.0631052	-0.833853	0	0	-0.247125	-0.539118	-0.425904	0	-0.000697656	-0.572624	-0.55816	-0.524276	-0.662742	-0.745514	-0.505123	-0.623293	-0.312913	-0.0339322	-0.767738	-0.638222	-0.640862	-0.435248	-0.619585	-0.597649	-0.307258
469	acrB	0.119317	-0.88618	-0.947148	-1.14326	-1.18957	-0.83727	-0.846921	-0.866417	-0.881214	-0.876265	-0.957565	-1.00539	-0.0698511	-0.846921	-1.03267	-0.0802473	-0.311202	-0.827684	-0.842088	-0.866417	-0.901182	-1.0217	-1.1532	-1.16522	-1.27167	-0.962801	-1.17127	-0.799303	-0.712942	-0.85177	-0.978626	-0.968057	-1.03818	-0.911271	-0.936806	-0.98394	-1.20811	10.2066	-0.936806	-0.941968	1.9919	-0.842088	-0.916342	-0.88618	-1.11189
470	acrA	-0.176412	0.734012	0.692501	0.707917	0.63383	0.767312	0.760741	0.747467	0.737393	0.740763	0.621579	0.759228	0.608959	0.760741	0.847042	0.0759488	0.195299	0.773838	0.764032	0.747467	0.723797	1.92235	0.552211	0.544025	0.641761	2.00454	1.24774	0.663903	0.410263	0.75744	0.671069	0.678266	0.736903	0.716928	0.635713	0.667452	0.685039	0.710011	0.805926	1.19006	0.819617	0.764032	0.713476	0.734012	0.580335
471	acrR	-0.0565532	1.04507	0.999669	1.17278	0.904247	1.08149	1.07431	1.05979	1.04877	1.05245	1.14085	1.0414	0.908294	1.07431	1.1062	0.762815	0.612104	1.08863	1.07791	1.05979	1.0339	0.463928	0.846226	0.837273	0.694172	2.04617	1.91602	0.606359	0.368113	1.0707	0.976228	0.984098	1.01698	1.02639	1.15631	0.972271	0.741507	1.01882	1.09248	1.39875	1.08917	1.07791	1.02261	1.04507	0.876987
472	mscK	0	0	0	0	0	0	0	0	0	0	0	0	0	0	0	0	0	0	0	0	0	0	0	0	0	0	0	0	0	0	0	0	0	0	0	0	0	0	0	0	0	0	0	0	0
473	ybaM	0.0367686	0.214417	0.243402	0.0786009	0.0601246	0.222959	0.21769	0.293356	0.328802	0.21302	0.216135	0.131116	0	0.21769	0	0	0	0.228193	0.220329	0.218397	0.188065	0.487519	0.552637	0.627501	0.383858	0	0.448647	0	0	0.244555	0.157134	0.181065	0.475066	0.182557	0.179966	0.142882	0.134	0.17701	0.186777	0.165797	0.231122	0.220329	0.191139	0.157843	0.200114
474	priC	0	0.071721	0.255866	0.295973	0.101541	0.263648	0.264524	0.268887	0.247631	0.269459	0.0863416	0.278729	0.390768	0.264524	0.654808	0.13783	0.0600347	0.262777	0.264085	0.268564	0.269451	0	0.03786	0.00110042	0.289912	0.789403	0.394974	1.06727	0.806838	0.0708666	0.278754	0.0814261	0	0.270367	0.274956	0.276966	0.320023	0.27129	0.0763182	0.273155	0.182453	0.264085	0.273098	0	0.358326
475	ybaN	-0.010339	0.236078	0	0.163301	0.210115	0.0769502	0.072514	0	0	0.172532	0.610182	0	0	0.072514	0	0	0	0.081357	0.0747358	0.177059	0.0475697	0	0	0	0	0	0	0	0	0.365404	0.125476	0.311946	0	0.0429318	0.144701	0.00952549	0.0415481	0.0382613	0.212805	0.0288204	0.0127154	0.0747358	0.154108	0.368307	0
476	apt	-0.106651	0.881323	0.917265	0.533401	0.648624	0.87725	0.873351	0.969587	1.00117	0.751391	0.457766	0.809136	0.817287	0.873351	0.700448	0.452809	0.183901	0.881124	0.875304	0.755371	0.851424	0.890258	1.18686	1.25504	0.791184	1.07388	0.768718	0.303371	0.12146	0.785126	0.710028	0.738136	0.878958	0.847348	0.726927	0.817983	0.626378	0.843242	0.860866	0.834944	0.941348	0.875304	0.735196	0.908857	0.710788
477	dnaX	-0.393401	0.786354	0.725386	0.612554	0.276802	0.776515	0.825614	0.655164	0.645711	0.79627	0.634845	0.667141	0.600144	0.807386	0.559086	0.170637	0.922611	0.84485	0.830447	0.776412	1.02135	0.620774	0.622965	0.507312	0	0.709733	0.195294	-0.126768	0	0.767251	0.527042	0.704477	0.506918	0.680593	0.735728	0.688594	0.714426	0.751103	0.641995	0	0.535399	0.830447	1.00619	0.121446	0.560641
478	ybaB	0.0560302	0	0	0.333447	0.41232	0.117498	0	0.301906	0.291219	0	0.160248	0	0.00507855	0.0364542	0.161564	0.173376	0	0	0	0.0594107	0	0.0601308	0.292738	0	0.894971	0	0.611938	0.258199	0.365452	0.107026	0.333731	0	0.254866	0.16134	0	0	0	0	0.187466	2.12418	0.258076	0	0	1.32982	0
479	recR	0	0.59126	0.539002	0.608938	0.536307	0.566041	0.624911	0.435682	0.429106	0.599759	0.438503	0.489077	0.573783	0.746937	0.516235	0.0847239	0.623321	0.641399	0.771911	0.645679	0.64983	0.440744	0.480821	0.709224	0.223986	0.668442	0.735778	0.256745	0	0.559597	0.749888	0.806794	0.601048	0.620416	0.690723	1.0196	0.458179	0.703902	0.667166	0	0.410716	0.629054	0.905042	0	0.540649
480	htpG	0.163134	1.02465	1.06649	0.840397	1.0147	1.03572	1.04648	1.16162	1.145	1.05287	1.07956	0.885363	0.938446	1.01893	0.879742	1.02889	0.714181	1.07437	0.989467	1.32621	1.26774	0.775438	0.949515	0.969298	1.07832	1.34573	1.10359	0.628744	0.594846	1.07592	0.862957	0.898543	0.838518	1.01613	0.990057	0.857527	0.912315	0.957555	1.00508	1.19403	1.50135	1.09931	1.26997	1.36216	0.923127
481	adk	0.0790995	0.872582	0.719222	0.709255	0.840656	0.973481	0.873783	0.793745	0.803965	0.827477	0.772752	1.01491	0.695124	0.806868	0.94445	0.312582	0.233971	0.839997	0.850483	0.754578	0.797826	1.25049	0.599251	0.807237	0.361537	0	0	0.172664	0	0.870518	0.852447	0.745508	0.931051	0.810286	0.741053	0.582964	0.586477	0.823628	0.734559	1.0135	0.355881	0.773648	0.80031	0.788817	0.674813
482	hemH	-0.0817	0.227817	0.224039	0.453952	0	0.0856161	0.0631486	0.219377	0.160533	0.112889	0.0667769	0	0.00820135	0.230435	0.218552	0	0	0.190894	0.132273	0.192293	0.255952	0	0.310348	0.218815	0.388069	2.69153	2.03711	0.569325	1.32306	0.0603981	0.21639	0.111277	0.135877	0.0771017	0.19273	0.4819	0.21874	0.0208878	0.208966	0	1.12025	0.32436	0.288752	0.187228	0.214384
483	aes	0	0.665508	0.839502	0.83819	0.460389	0.881676	0.79476	0.801906	0.708252	0.626186	0.578477	0.572938	0.70093	0.813347	0.65124	0.651912	0.496434	0.739665	0.646242	0.703659	0.613157	0.851863	0.639725	0.597057	0.489391	11.1276	12.7737	4.13902	9.86935	0.791914	0.587959	0.65729	0.579562	0.841968	0.730329	1.08078	0.979351	0.751035	0.810305	0.630597	2.65327	0.969756	0.603466	0.755043	0.90578
484	gsk	-0.0383377	0.390679	0.294912	0.299066	0.645303	0.596355	0.404088	0.383163	0.387097	0.408459	0.336701	0.28998	0.516916	0.400371	0.247047	0.395747	0.131502	0.434343	0.438625	0.402812	0.586147	0.217893	0.128816	0.125327	1.28999	0	0	0	0	0.399808	0.313743	0.310446	0.255865	0.330296	0.527089	0.409865	0.205983	0.338323	0.311094	0.341874	0	0.373922	0.372926	0.372772	0.433904
485	ybaL	-0.360363	-0.0376289	0	0.035311	-0.341021	0	0	-0.0178656	-0.0326626	0	0.00819616	-0.031842	0	0	0	-0.441659	-0.184252	0	0	-0.0178656	0	-0.0481438	-0.304649	0.0992053	-0.298122	1.12741	-0.19772	-0.0142698	0.196181	-0.00321883	-0.130075	0	-0.189632	-0.0627198	-0.0882549	-0.135389	-0.109557	0	0	0	-0.0345462	0	-0.0677908	0.0610626	0.176544
486	fsr	-0.0501623	0.606497	0.639289	0.679933	0.58686	0.714166	0.973829	0.631352	0.624375	0.59057	0.531161	0.822913	0.498105	0.716447	0.574407	0.0239081	0.144072	0.660021	0.641286	0.689803	0.666798	1.32758	0.474825	0.421457	1.06622	0.599294	0.373149	0.93202	-0.00881913	0.637982	0.743407	0.799189	0.55544	0.583539	0.494147	0.599796	0.455649	0.656048	0.654307	0.58559	0.487682	0.646842	0.647371	0.605234	0.53294
487	ushA	0.201629	0.685634	0.560595	0.345929	0.550614	0.700596	1.81786	0.665266	0.633989	0.789005	0.69734	0.635599	0.634518	0.652871	0.728051	0.399872	0.843477	0.705522	0.722847	0.681464	0.634422	0.0418713	0.644244	0.760024	0.167561	0.344259	0.478662	0.517853	0.592267	0.697333	0.664451	0.4836	0.928091	0.677103	0.932531	0.8214	0.501313	0.596426	0.541889	0.79611	0.673224	0.700625	0.65149	0.660154	1.13498
488	ybaK	0	0.502334	0.660999	0.644662	0.452305	0.40581	0.331318	0.593083	0.664718	0.707093	0.362186	0.327377	0.255174	0.534512	0.405354	0.242891	0.328429	0.530412	0.456832	0.419489	0.508466	0.839028	0.475973	0.427883	0.925859	1.15388	1.19561	0.327555	1.00475	0.518851	0.479092	0.537499	0.223839	0.49029	0.185702	0.490878	0.322405	0.59208	0.73263	0.462222	0.356687	0.523498	0.434523	0.594039	0.579219
489	chiX	0	0	0	0	0	0	0	0	0	0	0	0	0	0	0	0.39637	0	0	0	0	0	0	0	0	0.242107	0.579	0	0	0	0	0	0	0	0	0	0	0	0	0	0	0	0	0	0	0
490	ybaP	-0.299102	0.458877	0.630546	0.47583	0.773824	0.714672	0.701473	0.656242	0.396184	0.46681	0.577968	0.579229	0.593603	0.484729	0.352799	0	0.373279	0.505674	0.605262	0.645239	0.44132	0.266407	0	0.460856	0.252302	0	0.529587	0	1.22999	0.486405	0.542782	0.529015	0.58958	0.438804	0.838928	0.449224	0.594	0.469565	0.527708	0.586469	1.30655	0.494151	0.540303	0.504	0.534462
491	ybaQ	0	0	0	0	0	0	0	0	0	0	0	0	0	0	0	0	0.215889	0	0	0	0	0	0.876232	0	0	0	0.475836	0.313963	0	0	0	0	0	0	0	0	0	0	0	0	0	0	0	0	0
492	copA	-0.654058	0.228617	0.417649	0.36778	-0.0747753	0.277526	0.517876	0.24838	0.233583	0.238532	0.407232	0.109404	0.0449458	0.267876	0.0821307	-0.0504128	0.00692867	0.287112	0.272709	0.24838	0.213615	0.0931019	0.0234809	-0.0504255	-0.156876	0.151996	0.998089	1.09723	1.98632	0.263027	0.136171	0.14674	0.0766137	0.203526	0.177991	0.130857	0.156689	0.193366	0.177991	0.172829	0.356699	0.272709	0.198455	0.228617	0.00290404
493	glsA	0.229588	0.784753	0.737175	0.72673	0.46375	0.746852	0.742432	0.717906	0.676571	0.705647	0.72101	0.648788	0.590541	0.737966	0.534605	0.255571	-0.0958589	0.75568	0.742416	0.720012	0.686402	0.618068	0.529003	0.588895	0.503067	1.72383	0.434268	0.323496	0.531401	0.700659	0.60506	0.721855	0.548942	0.678707	0.827246	0.695748	0.469769	0.67465	0.74383	1.4738	0.658511	0.735844	0.755633	0.688667	0.480036
494	ybaT	0	0.0354483	0	0	0.158127	0	0	0	0.0802679	0	0	0	0.0463133	0	0	0.0391003	-0.185822	0	0	0	0	0.176941	0	0	0	0.0340901	-0.00232236	0.036516	1.62138	0.194737	0	0	0	0	0	0	0	0	0	1.35315	0.028174	0	0	0	0
495	cueR	-0.0998713	0.174326	0.133379	0.0910763	0	0.235581	0.178052	0.233381	0.284491	0.259903	0.19661	0.464933	0.257681	0.227182	0.420946	0	0.184224	0.243924	0.231388	0.210214	0.197503	0.0927151	0.156703	0.365639	0.723751	0.204178	0	0.52253	0	0	0.240383	0.0718955	0.202547	0.171176	0.256353	0.184362	0.204276	0.104041	0.17393	0	0.243713	0.303686	0.269207	0.337608	0.149709
496	ybbJ	0	0	0	-0.115665	-0.0850572	0	0	0	0	0	0	0	0	0	0	-0.0541591	0	0	0	0	0	0	-0.0486848	0	0	0	-0.0667563	0	-0.00170878	0	0	-0.0173882	0	0	0	0	0	0	0	0.0104355	0	0	0	0	-0.0073778
497	qmcA	-0.371545	0.148939	0.126346	0	0.217573	0.147759	0.292131	0.238409	0.0781829	0.131344	0.0747628	0	0.0378423	0.145487	0	0.40504	0.359921	0.150017	0.146625	0.140895	0.0803331	0.397096	0.139578	0	0.5575	0.00747074	0.307924	0.120414	0	1.43472	0.0662515	0.250621	0.0104394	0.13033	0.106771	0.134083	0.272833	0.301932	0.201274	0.329575	0.268794	0.0974953	0.23903	0.0379804	0.125976
498	fetA	0	0	0	0	0	0	0	0	0	0	0	0	0	0	0	0	0	0	0	0	0	0	0	-0.0944925	0	0	0	0	0	0.673312	0	0	0	0	0	0	0	0	0	0	0	0	0	0	0
499	fetB	-0.4965	0.0589129	0.0147235	0.177468	0.286488	0.101257	0.0414238	0.0438991	0.0884397	0.35941	0.0242175	0.295637	0	0.0937968	0.64154	0	0.247417	0.108667	0.097533	0.0787258	0.213413	0	0.345519	0	0	0.270185	0	0.0842756	0.621509	0	0.294919	0	0	0.0440524	0.257002	0.123281	0.423151	0.188343	0.353971	0.173005	0.0248186	0.115079	0.000884533	0.0985409	0.0879314
500	ybbN	-1.10549	2.17907	2.17357	1.90723	1.82203	2.1854	2.16985	2.1727	2.18672	2.03921	2.17736	2.03585	2.12993	2.1844	1.84774	1.44277	1.09939	2.18639	2.1849	2.18238	2.11254	2.00875	1.84839	2.04402	1.76976	2.01461	1.96099	1.3377	0.600584	1.68345	1.97712	2.13479	2.05144	2.17773	2.00805	2.0967	1.61835	2.33005	2.26665	2.04085	2.4473	2.18977	2.1663	2.19008	2.21221
501	ybbO	0	0.154609	0.0991598	0.140044	0	0.198018	0.197461	0.177147	0.155092	0.162445	0.0870348	0.0403671	0	0.189314	0.0161245	0	0	0.206665	0.193674	0.171729	0.137462	0.159049	0	0	0.0568682	0.189753	0	0	-0.150303	0.294034	0.178952	0.0874782	0.234023	0.131272	0.218376	0.0668856	0	0.0762187	0.0569597	0.115055	0.14095	0.190944	0.132803	0.148444	0.119366
502	tesA	0	0	0	0	-0.0227185	-0.0282048	-0.0311654	0	0	-0.08627	-0.105382	-0.21809	-0.253684	-0.0878994	-0.174516	-0.261753	-0.121237	0	-0.0296826	0	-0.0446043	-0.161049	-0.0550633	-0.114621	0	0	-0.293819	-0.0840991	-0.147683	-0.0925222	0	0	0	-0.0509074	-0.0801267	-0.119304	0.412023	-0.100965	0	-0.183544	-0.0314563	-0.0757849	0	-0.089312	-0.0830288
503	ybbA	-0.0217319	-0.040539	-0.158646	-0.0459974	0.0305226	-0.0587283	-0.0659841	-0.0355573	-0.0769408	-0.0452981	0	-0.0568894	0	0	0	0.0168825	-0.13745	-0.128953	-0.0623502	0	-0.0733937	0	-0.165697	-0.133015	-0.336416	-0.0489829	0	0.11415	0	0	-0.141618	-0.186423	-0.0425714	-0.114368	0	-0.126258	0	-0.0239353	-0.0465962	-0.00500958	-0.26157	-0.0196008	-0.137541	-0.0527534	0
504	ybbP	-0.484668	-0.491641	-0.20971	-0.147585	-0.220779	-0.425904	-0.430224	-0.141866	-0.462407	-0.297508	-0.141661	-0.0636056	-0.493391	-0.464758	-0.249079	-0.420738	-0.212008	1.61627	-0.428061	-0.332237	-0.0464789	-0.294007	-0.332711	0	-0.346549	0.0392709	-0.0115498	-0.125292	0.86209	-0.468837	-0.183368	-0.309595	-0.211462	-0.459028	-0.222605	-0.345705	-0.409768	-0.1878	0.0282007	-0.373858	-0.196801	-0.28221	-0.290468	-0.301946	0.337596
505	rhsD	0	0	0	0	0	0	0	0	0	0	0	0	0	0	0	0	0	0	0	0	0	0	0	0	0	0	0	0	0	0	0	0	0	0	0	0	0	0	0	0	0	0	0	0	0
506	ybbC	-0.104751	-0.826406	-1.00375	-0.913451	-0.780808	-1.03472	-1.03999	-1.05062	-0.914606	-0.67691	-1.00943	0	-0.5512	-0.804991	-0.724489	0.0677481	0.0863544	-0.938586	-0.946443	-0.815626	-0.834589	-0.953501	-1.06296	-1.03179	-0.898714	-1.1032	-0.0205546	-0.706283	-1.1711	-0.951724	-1.02092	-0.924244	-0.871586	-0.802361	-0.944929	-0.296544	-0.558869	-1.08063	-0.742893	-0.910014	-0.946084	-0.946443	-0.751949	-0.788675	-0.25998
507	rhsH	-0.114515	-0.589529	-0.766872	-0.676574	-0.543931	-0.797848	-0.803111	-0.813746	-0.677729	-0.440033	-0.772554	-0.97336	-0.314324	-0.568115	-0.487612	-0.096418	-0.261154	-0.70171	-0.709566	-0.578749	-0.597712	-0.716625	-0.826085	-0.794912	-0.442435	-0.866319	-0.783678	-0.362602	-0.805611	-0.714847	-0.784042	-0.687368	-0.634709	-0.565484	-0.708052	-1.05967	-0.321993	-0.843753	-0.506017	-0.673137	-0.709208	-0.709566	-0.515072	-0.551798	-0.023103
508	ybbD	0	0	0	0	0	0	0	0	0	0	0	0	0	0	0	0	0	0	0	0	0	0	0	0	0	0	0	0	-0.128609	0	0	0	0	0	0	0	0	0	0	0	0	0	0	0	0.0854869
509	ylbI	0	0	0	0	0	0	0	0	0	0	0	0	0	0	0	0	0	0	0	0	0	0	0	0	-0.219403	0	0	-0.106804	0	0	0	0	0	0	0	0	0	0	0	0	0	0	0	0	0
510	ylbG	0.031124	0	0	0	0	0	0	0	0	0	0	0	0	0	0	0.100055	0	0	0	0	0	0	0	0	0	0	0	0	0	0	0	0	0	0	0	0	0	0	0	0	0	0	0	0	0
511	mnmH	0.0423105	0.219542	0.322637	0.0436826	0.100434	0.158272	0.151978	0.139263	0.129613	0.0893627	0.0363409	0.0486267	0.105968	0.151978	0.03084	0.137634	0.515746	0.164524	0.15513	0.139263	0.0793233	0	0.235492	0.0895026	0	0.260277	0.119542	0.130476	0.0845911	0.148816	0.115773	0.259312	0.0334531	0.110011	0.186525	0.0191396	0	0.109601	0.00640085	0.089991	0.23941	0.15513	0.0632253	0.126374	0.389318
512	allS	0	1.33392	1.2915	1.3979	1.19177	1.41142	1.40471	1.39114	1.38085	1.47125	1.41469	1.29446	1.33658	1.40471	1.27549	0.812097	0.530365	1.41809	1.40807	1.39114	1.58435	1.47432	1.03718	1.15311	1.46237	1.48498	1.18613	1.02848	0.938449	1.40133	1.35656	1.23348	1.40209	1.35994	1.2987	1.39634	1.28677	1.34044	1.51609	1.33859	1.33606	1.40807	1.44337	1.37739	1.08994
513	allA	0.275365	0	0	0	0	0	0	0	0	0	0	0	0	0	0	0	0	0	0	0	0	0.546742	0.115559	0.179587	0	0	0.0281681	0	0	0	0	0	0	0	0	0	0	0	0	0	0	0	0	0	0
514	allR	0.0301709	0	0	0	0	0	0	0	0	0	0	0	0	0	0	-0.445194	-0.499046	0	0	0	0	0.0579322	0.13653	0	0.244821	-0.0240686	0	0	0	0	0	0	0	0	0	0	0	0.714326	0	0	0	0	0	0	0
515	gcl	-0.254265	0.491442	0.305474	0.307485	0.51117	0.415351	0.405701	0.386205	0.371408	0.501357	0.420057	0.445349	0.307771	0.530701	0.344955	0	0	0.424937	0.410534	0.386205	0.351439	0.154019	0.60553	0	0.565984	0.41482	0	0	-0.0865622	0.525852	0.273995	0.37087	0.464438	0.341351	0.440816	0.268682	0.294513	0.35073	0.513936	0.310654	0.494524	0.410534	0.33628	0.366442	0.140729
516	hyi	-0.0739855	-0.158272	-0.467771	0	-0.0533196	-0.218575	0	-0.239394	-0.249963	-0.246428	0	-0.433901	-0.412559	-0.13023	-0.262905	0	-0.125225	-0.11649	-0.222016	-0.0965366	-0.216607	0.249697	0	1.2997	0	-0.209563	0.799649	-0.785342	-0.421937	-0.276551	-0.188358	0.447261	-0.532797	-0.279524	-0.345383	-0.418577	-0.634408	0	-0.0991957	0	-0.273211	-0.222016	-0.398148	-0.205891	-0.3086
517	glxR	0	-0.919503	-0.590086	-0.565195	-0.813434	-0.961603	-1.04411	-0.98381	-0.995084	-0.991313	-0.710311	-0.835728	-0.731193	-0.889591	-1.03111	-1.19573	-1.65328	-0.874934	-0.965273	-1.03143	-0.803949	-0.774442	-1.12817	0	-0.829432	-0.979027	-1.19236	-0.0466805	-1.01854	-0.845666	-0.890809	0	-0.659446	-0.663073	-0.555545	-0.819383	-0.508283	-1.11862	-0.87871	-1.13916	-0.938111	-0.965273	-0.693599	-0.792518	-0.151567
518	ybbW	0.634047	0.673791	1.19331	0.416714	0.370399	0.722701	0.713051	0.693554	0.678757	0.683707	0.852407	0.804578	0.886361	0.713051	0.527305	0	0	0.982287	0.717884	0.693554	0.908789	0.413428	0.406771	0	0.538298	0.59717	0	0.406909	0	0.708201	0.581345	4.15137	0.521788	0.6487	0.623165	0.576031	0.601863	0.63854	0.873165	0.618003	0.551874	0.717884	0.643629	0.673791	1.02856
519	allB	-0.440846	-0.052746	-0.113714	-0.059823	-0.209898	-0.253836	0	-0.282983	-0.29778	-0.292831	-0.124131	-0.421959	-0.486417	-0.263487	0	-0.435535	-0.666489	-0.24425	-0.258653	-0.282983	-0.317748	-0.438261	-0.0697658	-0.331788	-0.438239	-0.379367	-0.337837	-1.21587	-1.21447	-0.268336	0	-0.134623	-0.454749	-0.077837	-0.353372	-0.400506	0.942092	0	-0.103372	-0.358534	0.172555	-0.258653	-0.332908	-0.302746	-0.278459
520	ybbY	-0.321017	1.48991	1.65536	1.51854	1.18651	1.53882	2.60171	1.50967	1.49487	1.49982	2.07352	1.51355	1.44909	1.52916	1.48628	1.36587	0.849202	1.5484	1.534	1.50967	1.84418	1.49725	1.59217	1.21086	1.8054	1.41328	1.20481	1.26355	0.816741	1.52432	1.54032	1.55089	1.3379	1.46481	1.43928	1.39215	2.5143	1.74037	1.80856	1.8034	1.61113	1.534	1.45974	1.71633	1.26419
521	glxK	-0.201615	-0.332385	-0.084522	0	0	-0.44014	-0.00562236	-0.445356	-0.464146	-0.25366	0	0	0	-0.303889	-0.418468	-0.254353	-0.0121875	-0.417243	-0.40406	-0.122158	-0.398095	-0.431685	-0.316779	-0.263806	0	-0.348603	-0.118028	-0.20694	0	-0.12646	-0.364428	-0.279641	0	0	-0.242649	0	0	-0.453701	-0.205129	-0.502842	0.125465	-0.428494	-0.184124	-0.494204	-0.287601
522	allE	0.0588047	-0.114092	-0.162721	-0.43316	-0.143756	-0.0115966	-0.180492	-0.0654395	-0.0564557	-0.018914	-0.14247	0.122217	0.0333452	-0.0898746	0	0	-0.507315	-0.0415472	-0.103616	-0.146395	0	-0.195575	0	0	0	0	-0.139772	-0.206548	-0.367268	0	0	-0.166989	-0.138133	-0.234258	-0.0336671	0	-0.310004	-0.170446	-0.118087	-0.106087	-0.133658	-0.0486386	-0.185061	0	-0.076469
523	allC	0.0499146	-0.140541	-0.1828	-0.0880528	-0.318052	-0.0575401	-0.0468741	-0.132632	-0.360809	-0.168948	-0.344443	-0.0309018	-0.232424	-0.122456	0.0708577	-0.404216	0	-0.11479	0	-0.292049	-0.117806	-0.228756	-0.315368	0.383514	0.32571	-0.348009	-0.252194	0	-0.0221876	-0.201629	-0.392095	-0.0934793	-0.372578	-0.0888494	-0.147986	-0.232204	-0.00549073	0.823173	-0.201149	-0.24024	-0.159171	-0.143341	-0.101965	-0.230304	0
524	allD	-0.103892	-0.953265	-0.900918	-0.543885	-0.701196	-0.931205	-1.0261	-1.03995	0	-0.547186	-0.205543	-0.647319	-0.25448	-0.920045	-0.939269	-0.287352	0.0833784	-1.00717	-0.938328	0.878383	-0.984223	-0.945312	-0.256504	-1.01333	-0.89754	-0.641306	-0.743414	-0.909762	0	-0.818047	0.340318	-0.939265	-0.480968	-0.976678	-0.910445	-0.826023	-0.650419	-0.952493	-0.89137	-0.757721	-0.911004	-0.915158	-1.08405	-0.846722	-0.452352
525	fdrA	-0.830609	0	0.171057	-0.140279	0	0	0	0	-0.263008	0.227233	0.188961	0	0.00595639	0	0	0.060305	-0.096715	0	0	-0.0815448	0	-0.0883858	-0.11616	0	0.106673	0	0.24816	0	-0.109355	0	0	0	0.355945	0	0	-0.0903937	0.174258	0	0	0	0	0	0	0	0
526	ylbE	-0.374795	0.0899661	0	-0.110432	0.296014	0.138876	0.129226	0.109729	0.0949324	0.336603	0	-0.0148448	0.127194	0.129226	-0.05652	0	0.0404105	0.148462	0.134059	0.331952	0.074964	0.0655623	0.438507	0.238914	0.415736	0.124456	0	-0.454053	0.732139	0.124376	0.618071	0.1192	0.257193	0.0648751	0.03934	0.103317	0	0.0547153	0.372673	0.432508	0.190271	0.134059	0.0598041	0.0899661	0.0864756
527	ylbF	-0.0463248	-0.0608801	0	-0.114774	0	0	0	0	-0.0113623	-0.00731291	-0.119286	-0.06481	-0.211156	0	0	-0.425541	-0.129877	0	0	0	0	-0.0542577	0.390942	0.659006	0	-0.0781157	-0.294137	0	0	0	0	-0.0369613	0	0	-0.102301	-0.00450197	-0.169047	0	-0.0113924	0	-0.115176	0	0	-0.0154256	-0.146921
528	ybcF	-0.104398	-0.58075	-0.797158	-0.93588	-0.664582	-0.687281	-0.696931	-0.716427	-0.725543	-0.722618	-0.622932	-0.697998	-0.689283	-0.696931	-0.882676	-0.0312089	-0.869754	-0.677695	-0.692098	-0.716427	-0.626192	-0.396456	0	0.153495	-0.673563	-0.773754	-0.749213	-0.878072	-1.26863	-0.70178	-0.578636	-0.674587	-0.888193	-0.761281	-0.610666	-0.831699	-0.275475	-0.771441	-0.65612	-0.791978	-0.80052	-0.692098	-0.641352	-0.728477	-0.638442
529	purK	0	0	0	0	0.164948	0	0	0	0	0	0	0.0489491	0	0	0	0.102027	0	0	0	0	0	0	0	-0.0301787	0	0.18379	0.60577	0	-0.0931266	0	0	0	0	0	0	0	0	0	0	0.0871824	0.0220455	0	0.0602054	0	0
530	purE	0.104505	-0.16885	0	-0.0925933	0	-0.11994	-0.12959	-0.149086	-0.163883	-0.158934	-0.240234	0	-0.352521	-0.12959	0	0	0	-0.110354	-0.124757	-0.149086	-0.183852	0	0	0.055828	-0.554343	0	0	-0.571865	-0.29246	-0.13444	-0.261296	-0.250727	-0.320853	-0.193941	-0.219476	-0.26661	-0.157444	-0.204101	-0.219476	-0.224638	-0.290767	-0.124757	0	-0.16885	0
531	lpxH	0	-0.832333	-1.06215	-0.665666	-0.373748	-0.832333	-0.832333	-0.832333	-0.665666	-0.832333	-0.832333	-0.953729	-0.665666	-0.568172	-0.550175	-0.698237	-0.498364	-0.832333	-0.832333	-0.832333	-0.832333	-0.872537	-0.934869	0	-0.401506	-1.0778	-0.0171556	0	-1.04556	-0.832333	-0.665666	-0.665666	-0.665666	-0.832333	-0.665666	-0.499	-0.999	-0.665666	-0.665666	-0.112011	-0.234839	-0.832333	-0.864678	-0.832333	-0.673241
532	ppiB	0.0885059	0	0	0.214742	0.390193	0	0	0	0	0	0	0.222051	0	0	0.197301	0	0.0303354	0	0	0	0	0	0	0	0	0	2.19473	0	0	0	0	0.224656	0	0.0334731	0	0	0	0	0	1.7959	1.04901	0	0	0	0.922471
533	cysS	0.20689	0.776179	0.600968	0.383203	0.592411	0.672566	0.666277	0.614864	0.605222	0.608447	0.936116	0.405967	0.593315	0.666277	0.284305	0.515253	0.315747	0.504618	0.669427	0.653573	0.614144	0.552392	1.00037	0.276858	0.705406	0.401694	0	0	0	0.663117	0.580456	0.320388	0.448276	0.814037	1.54027	0.576994	0.49197	0.986313	0.595818	0	0.0569116	0.669427	1.20698	0.460357	0.153951
534	ybcI	0	0	0	0	0	0	0	0	0	0	0	0	0	0	0	0	0	0	0	0	0	0	0	0.713332	0	0	0	0	-0.368848	0	0	0	0	0	0	0	0	0	0	0	0	0	0	0	0
535	ybcJ	-0.124994	0.0862933	0.238618	0.124332	0	0.289658	0.285175	0.327732	0.320858	0.323157	0.111199	0.272925	0.0852177	0.285175	0.415277	0.395489	0	0.526369	0.28742	0.276119	0.282338	0.20399	0.292998	0	0	0.483445	0	0.444446	0	0.282922	0.223996	0.435074	0.320827	0.313379	0	0.221527	0.369335	0.0924469	0.259273	0.0551041	0.183422	0.28742	0	0.50739	0
536	folD	-1.92844	1.25894	0.968383	0.858154	1.02266	1.03856	1.0324	1.09091	1.08146	1.08462	1.16818	0.933364	1.13102	1.0324	0.733342	0.183694	0.678375	0.86404	1.03549	1.01995	0.941822	0.920769	0.720035	1.17571	0.882182	0.728139	1.04096	0.0672511	-0.035013	1.0293	0.948277	0.794674	0.915989	0.939364	1.16432	0.944883	0.988854	1.0801	0.935361	1.29231	0.986862	1.03549	1.18348	0.806196	1.10034
537	sfmA	-0.146324	0	0	0.0135415	0	0	0	0	0	0	0	0.275408	0.252879	0	0.0545453	0.250772	0.162106	0	0	0	0.173352	0	0	0	0.262703	0.153762	0	0	0	0	0	0	0.330863	0.0303687	0	0	0.0685302	0.124593	0.122846	0.207928	0.335756	0	0.00587038	0.0634957	0
538	sfmC	0	-0.392697	-0.453665	-0.280493	-0.345597	-0.343787	-0.496295	-0.331151	-0.530588	-0.525639	-0.249796	-0.255841	-0.207087	-0.496295	-0.211686	-0.0408906	-0.0262808	-0.477058	-0.420033	-0.444362	-0.0680642	-0.671069	-0.302574	-0.445316	-0.284841	-0.303466	-0.493148	-0.514618	-0.359114	-0.429715	-0.628	-0.432791	-0.145774	-0.274931	-0.300466	-0.305817	-0.0178473	-0.427948	-0.40154	-0.377056	-0.329974	-0.420033	-0.257007	-0.24984	-0.165563
539	sfmD	0.344806	-0.54012	-1.10109	-0.797197	-1.34351	-0.99121	-1.00086	-0.520357	-1.03515	-0.530204	-0.611505	-0.659333	-0.723791	-1.00086	-1.18661	-1.02667	-0.050104	-0.981624	-0.996027	-1.02036	-1.05512	-1.17563	-1.30714	-1.31916	-1.42561	-1.11674	-1.32521	-1.45324	-1.15936	-1.00571	-1.13257	-1.122	0.600358	-1.06521	-0.090746	-1.13788	-0.862048	-1.07537	-1.09075	-1.09591	-1.16204	-0.996027	-1.07028	-1.04012	-1.26583
540	sfmH	0	-0.813529	-1.0745	-0.753613	-0.716921	-0.964619	-0.974269	-0.993766	-0.908563	-1.00361	-1.08491	-0.715749	-1.0387	-0.974269	-0.801519	-1.13406	-1.03748	-0.955033	-0.969436	-0.893766	-0.928531	-0.949044	-0.822052	-1.03407	-1.14053	-0.350918	-0.707931	-0.560474	-0.620994	-0.979119	-0.447479	-0.83691	-0.865532	-0.83862	-0.647162	-0.852793	-0.344768	-1.04878	-0.905659	-1.06932	-0.835446	-0.969436	-0.511498	-1.01353	-0.522249
541	sfmF	-0.110446	0	0	0	0	0	0	0	0	0	0	0	0	0	0	0	-0.0743563	0	0	0	0	0	0	0	0	0	0.058858	0	0	0	0	0	0	0	0	0	0	0	0	0	0	0	0	0	0
542	sfmZ	0	0.0103698	0	0	0	0.0375418	0.0321806	0	0.346462	0.0158784	0	0	0	0.0321806	0.262322	0	0	0.0428674	0.0348657	0.0213494	0.00203525	0	0	0	0	0.718616	0.0506836	0.104841	0	0.0294865	0	0	0.0139771	0.0519859	0.348075	0.0116142	0.404961	0	0	0	0	0.0348657	0.0491687	0.0103698	0.357739
543	argU	0	0.505165	0.452493	0.41488	0.310069	0.532337	0.526976	0.733224	0.341257	0.510674	0.442076	0.394248	0.42979	0.526976	0.257117	0.192927	0.0204692	0.537663	0.529661	0.516145	0.49683	0.377946	1.13348	0.234419	0.860988	0	0.604337	0.307155	0.509418	0.524282	0.421015	0.631584	0.508772	0.546781	0.342871	0.506409	0.399756	0.47821	0.462835	0.457673	0.391543	0.529661	0.543964	0.505165	0.560053
544	intD	-0.631583	-0.22726	-0.242343	-0.124429	-0.186026	-0.187817	-0.195599	0	-0.114	-0.197758	-0.284828	-0.25165	-0.199073	-0.135325	0	-0.630707	-0.402168	-0.24662	-0.191702	-0.245407	-0.224776	-0.358052	0.172966	-0.48039	0.130387	-0.18383	0	-0.170135	-0.54342	-0.266747	-0.334686	-0.0910241	-0.244291	-0.16698	-0.0250283	-0.204081	-0.16473	0	-0.337808	-0.306335	-0.430475	-0.170196	0	-0.180595	0
545	xisD	0	0	0	0	0	0	0	0	0	0	0	0	0	0	0	0	0	0	0	0	0	0	0	0	0	0	0	0	0	0	0	0	-0.0517885	0	0	0	-0.522878	-0.498402	0	0	0	0	0	0	0
546	exoD	0	0	0	-0.116881	-0.353808	0	0	-0.288703	0	0	0	-0.0284443	-0.133602	-0.0321109	-0.19787	0	-0.0721949	0	0	0	0	0	0	-0.187742	0	0	0	0	0	0	0	-0.0697808	0	0	0	-0.0161592	0	0	0	0	0	0	-0.0750322	0	0
547	peaD	0	-0.346049	-0.460763	-0.512057	0	-0.322383	-0.327053	-0.115533	-0.616784	-0.395015	-0.38059	-0.264662	0	-0.413517	-0.387161	-0.126405	-0.323666	-0.132649	-0.324714	-0.251273	-0.389764	-0.357857	0	-0.0353462	0	-0.500544	-0.522577	-0.41869	0	-0.136003	-0.202882	-0.234916	-0.55401	-0.508264	-0.185713	-0.616079	0	0	-0.147847	-0.28783	0	-0.378477	-0.497682	-0.462712	-0.472716
548	renD	0	0	0	0	0	0	0	0	0	0	0	0	0	0	0	-0.037808	0	0	0	0	0	0	0	0	0	0	0	0	0	0	0	0	0	0	0	0	0.129499	0.408463	0	0	0	0	0	0	0
549	insE1	0.0794712	0	0	0	0	0	0	0	0	0	0	-0.523113	-0.216981	0	-0.149878	-0.279392	-0.272046	-0.0375243	0	0	0	0	-0.44212	0	-0.379939	-0.291268	-0.244459	-0.120992	0	-0.050607	-0.211434	-0.033708	0	-0.102425	0	0	0	0	-0.0967965	0	-0.285612	0	0	0	-0.261136
550	insF1	0	0	0	0	0	0	0	0	0	0	0	0	0	0	0	0	0	0	0	0	0	0	0	0	0	0	0	0	0	0	0	0	0	0	0	0	0	0	0	0	0	0	0	0	0
551	renD	0	0	0	0	0	0	0	0	0.0714313	0	0	0	0	0	0	0	0	0	0	0	0	0	0	0	0	0	0	0	0	0	0	0	0	0	0	0	0.0877013	0	0	0	0	0	0	0	0
552	emrE	-0.0326728	-0.565193	-0.530805	-0.424442	-0.4394	-0.865394	-0.871931	-0.760939	0	-0.633745	-0.946884	0	-0.449359	-0.685337	-0.479176	-0.398824	0	-0.953112	-0.868657	-0.76584	-0.29306	-0.915058	-0.654045	-1.2804	-0.820882	0	-0.209131	0	-0.248877	-0.964786	-0.810857	-0.878396	-0.167555	-0.513588	-0.657714	-0.232853	0.492507	0	-1.006	-0.81702	-0.695667	-0.610593	-0.305701	-0.533533	0
553	ybcK	0	0.418358	0.35739	0.161281	0.114966	0.467267	0.457617	0.438121	0.423324	0.428273	0.346973	2.62107	0.234687	0.457617	0.271872	0	0.993336	0.476854	0.46245	0.438121	0.403356	0.282843	0.151338	0.139316	0.0328646	0.341737	0.133267	-0.494765	-0.74449	0.452768	0.325912	0.336481	0.266355	0.393267	0.367732	0.320598	0	0.383107	0.367732	0.36257	0.29644	0.46245	0.388196	0.418358	1.19265
554	ybcL	-0.104733	-0.372067	-0.433035	-0.564148	-0.388241	-0.323157	-0.443919	-0.352304	-0.478212	-0.362152	-0.221229	-0.269058	-0.0462977	-0.443919	0	-0.0177997	0.279573	-0.424682	-0.439086	-0.176197	-0.164847	-0.618693	-0.527976	-0.363891	-0.75756	-0.448688	-0.0740553	-0.423535	-0.962423	-0.448768	-0.575624	-0.453944	-0.52407	-0.508269	0	-0.29372	0	-0.407318	-0.533804	-0.538966	-0.605095	-0.439086	-0.144237	-0.084849	0.0199975
555	ybcM	0	0.406234	0.345266	0.347277	0.227841	0.580143	0.445493	0.550997	0.4112	0.416149	0.334849	0.37216	0.472563	0.445493	0.707868	0.206336	0	0.40001	0.450326	0.425997	0.516231	0.270719	0.264214	0.450312	0	0.329612	0.167639	0	0	0	0.287141	0.40088	0	0.335713	0.751848	0.202891	0.730546	0.370983	0.355607	0.350446	0.284316	0	0.501072	0.531234	0.488643
556	ylcH	0	0	0	0	0	0	0	0	0	0	0	0	0	0	0	0	0	0	0	0	0	0	0	0	0	0	0	0	0	0	0	0	0	0	0	0	0	0	0	0	0	0	0	0	0
557	ybcN	0	0	0	0	0	0	0	0	0	0	0	0	0	0	0	0	0	0	0	0	0	0	0	0	0.711687	0	0	0	0	0	0.0355285	0	0	0	0	0	0	0	0	0	0	0	0	0	0
558	ninE	0	0	0	0	0	0	0	0	0	0	0	0	0	0	0	0.0182251	0.0628243	0	0	0	0	0	0	0	0	0	0	0	0	0	0	0	0	0	0	0	0	0	0	0	0	0	0	0	0
559	ybcO	-0.349761	0	0	0	0	0	0	0	0	0	0	0.106293	0	0	0	1.21664	1.26322	0.172583	0	0	0	0	0	0	0	0	0.542676	0	0	1.28911	0	0.129269	1.28136	0.121145	0	0.281554	0	0	0	0	0	1.37522	0	0	0
560	rusA	0	-0.396157	-0.396157	-0.817621	0	-0.396157	-0.396157	-0.396157	-0.396157	-0.396157	-0.396157	0	-0.396157	-0.396157	-0.396157	1.75492	2.15093	-0.146157	-0.396157	-0.396157	-0.396157	-0.396157	-0.431323	-0.396157	0	-0.396157	0	0	0	0.612045	-0.396157	0	1.02136	-0.146157	-0.146157	0	0	-0.396157	-0.396157	-0.396157	-0.396157	0.910749	-0.396157	-0.396157	-0.146157
561	ylcG	0	-0.164387	-0.225355	0	-0.467712	-0.115477	-0.125127	-0.144624	-0.159421	-0.154471	-0.235771	-0.283533	-0.348058	-0.125127	-0.310873	0	0	-0.105891	-0.120294	-0.144624	-0.179389	-0.299902	0.0427498	-0.443429	-0.349813	-0.241008	0	-0.794435	-0.57906	0	-0.256833	-0.246197	0	-0.189478	-0.215013	-0.179073	-0.403241	-0.199638	-0.215013	-0.220175	-0.286304	0	-0.194549	-0.164387	-0.3901
562	quuD	-0.601181	0.229336	0.168368	0.305592	0	0.278246	0.268596	0.249099	0.234302	0.239252	0.157951	0.110123	0.0456651	0.268596	0.08285	-0.21636	-0.780648	0.287832	0.273429	0.249099	0.214334	0	0.996703	0	0	0.152715	-0.0557552	0	-0.428154	0.059731	0.13689	0.147459	0	0.204245	0.17871	0.131576	0	0.194085	0.17871	0.173548	0.107419	0	0.0731151	0.229336	0.336957
563	nmpC	0	0	0	0	0	0	0	0	0	0	0	0	0	0	0	0	0	0	0	0	0	0.409843	1.17519	0.256885	0	0	0	0	-0.0348611	0	0	0	0	0	0	0	0	0	0	0	0	0	0.126059	0	0
564	insH1	0	0	0	0	0	0	0	0	0	0	0	0	0	0	0	0	0	0	0	0	0	0	0	0	0	0	0	0	0	0	0	0	0	0	0	0	0	0	0	0	0	0	0	0	0
565	nmpC	-3.27195	2.50031	2.43934	2.24323	2.19692	2.54922	2.53957	2.52007	2.50528	2.51022	2.42892	2.3811	2.31664	2.53957	2.35382	1.72128	1.49032	2.5588	2.5444	2.52007	2.48531	1.95495	1.05809	1.96438	2.11482	2.42369	2.21522	2.05733	1.08858	3.03472	2.40786	2.41843	2.34831	2.47522	2.44968	2.90255	2.17838	2.46506	2.44968	2.44452	2.37839	2.5444	2.34409	2.50031	2.2746
566	essD	-0.53328	0	0	0	0	0	0	0	0	0	0	0	0	0	0	0	0	0	0	0	0	0	0	0	0	0	0	0.0597062	0	0	0	0	0	0	0	0	0	0	0	0	0	0	0	0	0
567	rrrD	0	0	0	-0.0857862	-0.0346076	0	0	0	0	0	0	0	-0.179047	0	0	0	0	0	0	0	-0.0103781	0	-0.095729	-0.0102578	0	0	1.5451	0.148791	-0.0663683	0	0	-0.0772529	-0.147379	0	0	0	0	-0.0306268	-0.046002	-0.0511637	-0.117293	0	-0.0255379	0	0
568	rzpD	-0.0763272	0	0	0	0	0	0	0	0	0	0	0	0	0	0	0.215091	0	0	0	0	0	0	0	0	0	0	0	0	0	0	0	0	0	0	0	0	0	0	0	0	0	0	0	0	0.203768
569	rzoD	-0.188992	0	0	0	0	0	0	0	0	0	0	0	0	0	0	0	0	0	0	0	0	0	0	0	0	0	0	0	0	0	0	0	0	0	0	0	0	0	0	0	0	0	0	0	0
570	borD	0	1.07834	1.0435	0.973277	1.08962	1.10629	1.10078	1.08964	1.08118	1.08401	1.03397	1.08165	0.973387	1.10078	0.958868	0	0.96753	1.11177	1.17497	1.08964	1.06977	1.07233	0.838334	0.826312	0.719861	1.35185	0.27434	0.733849	0.33642	1.09801	1.21016	1.02348	1.17612	1.20686	1.04941	0.808194	0.981546	1.0582	1.04941	1.04646	0.983436	1.10354	1.13254	1.14977	0.803263
571	ybcV	0	0.0360154	0.00117652	0	0.0472886	0.0639637	0.0584493	0.0473087	0.0388532	0.0416814	0	0.0393222	0.431061	0.0584493	0	0.537748	0	0.0694415	0.13264	0.0473087	0.0274427	0.0300068	0	0	0	0	0.777117	0.6925	0.294093	0.0556783	0.167829	0	0.133797	0.164535	0.0070862	0.265867	0	0.015872	0.0070862	0.00413666	0	0.0612112	0.0902085	0.107444	0.464705
572	ybcW	0.151633	0	0	0	0	0	0	0	0	0	0	0	0	0	0	0.278569	0	0	0	0	0	0	0	0	0	0	0	0	0	0	0	0	0	0	0	0	0	0	0	0	0	0	0	0	0
573	ylcI	0.0566325	-0.267429	-0.105035	-0.062232	-0.151428	-0.179096	-0.188746	-0.208242	-0.263508	-0.21809	-0.104315	-0.361544	0	-0.188746	-0.272757	0	-0.390609	-0.16951	-0.183913	-0.282613	-0.068746	-0.216519	-0.476857	-0.507048	-0.738188	-0.286459	0	0	0	-0.193595	-0.423831	0	-0.178026	-0.318025	-0.307396	-0.2175	-0.446163	-0.0450009	-0.278631	-0.283793	-0.349923	-0.183913	0	-0.109534	-0.287728
574	nohD	0.30317	0	0	0.177747	0	0	0	0	0	0	0.24549	0	0	0	0	0	0	0	0	0	0	0	0	0	0	0	0	0	0	0	0	0	0	0	0	0	0.0406135	0	0	0	0	0	0	0	0
575	aaaD	0	0	0	0	0	0	0	0	0	0	0	0	0	0	0	0	0	0	0	0	0	0	0	0	0	0	0	0	0	0	0	0	0	0	0	0	0	0	0	0	0	0	0	0	0
576	tfaD	0	0	0	0	0.242049	0	0	0	0	0	0	0	-0.32835	0	0	-0.440532	0	0	0	0	0	0.939088	0.877156	0	0.68485	0	0.297926	-0.0500838	0	0	0	0.274718	-0.00991089	0	0	0	1.5877	0	0	0	0	0.0145019	0	0	0
577	ybcY	0	-0.298431	-0.580197	-0.123907	-0.473824	-0.436412	-0.436412	-0.436412	-0.294772	-0.436412	-0.326693	-0.386273	-0.0190118	-0.436412	0	-0.132016	-0.317282	-0.436412	-0.436412	-0.176113	-0.546328	-0.450916	0	-0.436412	0	0	-0.839332	-0.667185	0	-0.436412	-0.0745828	-0.246295	-0.128483	-0.209163	-0.335735	-0.31534	-0.00712645	-0.407825	-0.436412	-0.436412	-0.436412	-0.436412	-0.584403	-0.351063	-0.0173776
578	tfaX	-0.133327	0	0	0	0	-0.0138307	-0.0234809	-0.0429771	0	-0.0528249	0	0	0	-0.0234809	-0.395639	0	0	-0.00424467	-0.0186477	0	0	0	-0.766172	-0.0917826	0	-0.575774	0	0	-1.66088	-0.0283303	0	-0.334735	-0.0177167	0	0	0	0	0	-0.113366	-0.118528	-0.184658	-0.0186477	0	0	0.19449
579	appY	-0.224241	0.0814928	0.0205248	0.235542	0	0.130402	0.120752	0.101256	0.086459	0.0914082	0	0	0.897822	0.120752	0	-0.345255	0.571509	0.139988	0.125585	0.101256	0.0664906	0	0	0	-0.304	0.0048715	0	-0.139403	0	0.115903	1.28153	0	0.42949	0.0564018	0.0308667	0	0	0.546242	0.0308667	0.025705	0	0.118334	0.0513308	0.0814928	0.16129
580	ompT	0	0	0	0	0	4.22527	4.4999	5.28065	5.15285	0	0	0.145193	0	0	0	-0.23939	0.234548	0	0	0	0	-0.0730772	-0.182047	-0.00827701	-0.323055	0	-0.19228	0	-0.0860864	0	0	0.170614	-0.0426903	0	0	-0.00874244	0.295935	0	0	0	-0.0297212	0	0	0	0.236644
581	pauD	0	0.228383	0.167415	0.313007	0.100025	0	0	0.500552	0.485755	0.238299	0.156999	0	0.136413	0.267643	0.173598	0	0.0263329	0.286879	0.272476	0.248147	0.213381	0	0	0.0410417	0	0.151762	0	0.330029	0	0.262793	0.135937	0	0.0763803	0.203292	0.177757	0.130623	0.158861	0.193133	0.177757	0.172596	0.106466	0.272476	0.198221	0.403417	0.255076
582	envY	0.24794	0.0125509	0.137551	0	0	0.604404	1.0039	0	0	0.0125509	0.0125509	0.390394	0	0.0125509	0	0	0.205943	0.0125509	0.0125509	0.262551	0.137551	0	0.0989145	0	0.248552	0.0125509	0.153963	0	-0.419147	0.0125509	0.0125509	0.418197	0.0125509	0.0125509	0.0125509	0.137551	0	0.0125509	0.137551	0.590983	0.137551	0.0125509	0.210671	0	0
583	ybcH	0.0845227	-0.180002	-0.0591522	-0.34617	-0.301576	0	0	0	0	-0.170087	-0.251387	-0.299216	-0.363673	-0.140743	0	-0.755451	0	-0.121507	0	-0.06933	-0.104095	0.545359	-0.157745	-0.458292	0.605007	-0.256624	-0.212617	-0.177051	0	-0.145592	-0.272449	-0.117792	-0.328125	-0.205093	-0.230628	-0.186059	-0.411021	-0.215253	-0.139719	0.0359789	-0.208309	-0.13591	-0.0660768	-0.0890933	0
584	nfrA	-0.412586	0.672114	0.611146	1.41504	0.368722	0.721024	0.711374	0.691878	0.677081	0.68203	0.60073	0.552901	0.488443	0.711374	0.525628	-0.106915	0.66213	0.73061	0.716207	0.691878	0.657112	0.536599	1.40509	0.393072	0.286621	0.595493	0.387023	1.34395	-0.73961	0.706524	0.579668	0.590237	1.52011	0.647023	0.621488	0.574354	0.350186	0.636864	0.621488	0.616327	0.550197	0.716207	0.641952	0.672114	0.446402
585	nfrB	-0.823253	0.521342	0.471174	0.252662	0.638602	0.561588	0.553647	0.537604	0.525429	0.529501	0.611174	1.01753	0.501636	0.553647	0.383662	0	0.199494	0.718047	0.557624	0.520461	0.657569	0.438463	0.301623	0.274587	0.159823	1.3424	0.232411	1.04996	1.01762	0.549657	0.576701	0.57537	0.487694	0.649267	0.611113	0.589471	0.405013	0.310879	0.628255	0.624008	0.914565	0.557624	0.496523	0.602743	0.335613
586	cusS	0.261908	0.23566	0.19455	0.376603	0.181059	0.268639	0.262132	0.248986	0.239009	0.242346	0.170384	0.0867052	0.288956	0.262132	0.331173	0.00425392	0.563382	0.25796	0.265391	0.443272	0.208402	0	0.0556127	0.241792	0.477949	0.274291	0.659298	0.241495	0.355838	0.258863	0.350468	0.471245	0.43031	0.201599	0.378667	0.152599	0.00144598	2.2684	0.184381	0.180901	0.0965059	0.265391	0.215323	0.646453	0.0834654
587	cusR	0.0810218	1.55136	1.51687	1.49165	1.24636	1.57903	1.57357	1.56255	1.55417	1.55697	1.48812	1.3925	1.35032	1.57357	1.39421	1.16917	0.991654	1.5616	1.57631	1.48826	1.52002	2.41858	1.40031	1.31922	1.14126	1.29508	1.1546	0.530185	0	1.57083	1.40192	1.36445	1.52823	1.51431	1.42558	1.4732	1.34639	0.745111	1.49987	1.49695	1.40646	1.57631	1.5343	1.57077	1.42368
588	cusC	0	-0.282243	-0.19778	-0.103193	-0.474457	-0.264224	-0.267779	-0.274962	-0.280414	-0.306397	-0.20328	-0.361252	-0.60745	-0.162516	-0.353756	-0.365816	-0.192844	-0.260692	-0.265999	-0.292506	-0.357946	-0.0644088	0	-0.366186	-0.296446	-0.601862	-0.156103	-0.439519	-0.0271089	-0.269566	-0.374896	-0.207146	-0.303157	-0.379207	-0.318439	-0.0829088	-0.406811	-0.295231	-0.441246	-0.431566	-0.0080468	-0.265999	-0.398619	-0.352419	-0.159175
589	cusF	0.195442	-0.38708	-0.353455	-0.452665	-0.143972	-0.348467	-0.356085	-0.371477	-0.383159	-0.212414	-0.408348	-0.270669	-0.0434932	-0.320998	-0.397463	0	0	-0.340899	-0.35227	-0.266214	-0.311204	-0.0714781	-0.126462	-0.248875	0	0	-0.535094	-0.0754878	-0.448358	-0.359914	-0.303488	-0.416632	-0.384275	-0.213906	-0.321785	-0.209701	-0.133781	-0.414909	-0.251609	-0.186828	-0.618062	-0.35227	-0.112646	-0.29936	-0.607643
590	cusB	0.170195	0.0687593	0.189609	0.190766	0.23536	0.117669	0.108019	0.0885226	0.0737256	0.222762	0.270102	0.222273	0.301903	0.198928	0.0131823	0.348262	0.323038	0.127255	0.112852	0.179432	0.0537571	0.850286	-0.106288	0.0247136	0.19099	0.433773	0	0.344438	-0.143062	0.103169	0	0.1687	0.242662	0.316396	0.199951	0.152817	0.254555	0.0335085	0.199951	0.0129715	0.037751	0.112852	0.311325	0.159668	0
591	cusA	-0.198838	0.255097	0.194129	0.99802	-0.0482956	0.304006	0.294356	1.27486	0.260063	0.265012	0.183712	0.135883	1.07143	0.294356	0.10861	-0.523933	1.83007	0.313592	0.299189	0.27486	0.240094	2.70454	-0.0119232	-0.0239457	7.05943	0.178475	-0.0299947	0.926937	3.0133	0.289507	0.16265	1.17322	0.103093	0.230006	0.204471	1.7423	-0.0668315	0.219846	0.204471	0.199309	1.13318	0.299189	0.224935	0.255097	0.0293838
592	pheP	-0.17694	-0.0121204	0.134295	0	-0.0499314	0.038316	0	0	0.00212738	0.00620321	0	0.0763326	0.024889	0	-0.0474954	-0.157937	0	0	0	0	0	-0.0245361	0	-0.291163	0.342132	-0.0869845	-0.146209	0.319383	0	0	0	-0.0785721	0	-0.0364134	-0.0627465	0	-0.082734	0	-0.0445884	0.225263	-0.114097	0	0.0420174	0	0
593	ybdG	-0.0936403	0.453799	0.859257	0.716059	0.400407	0.493129	0.493058	0.598562	0.458233	0.462163	0.507414	0.565502	0.252068	0.493058	0.307313	0.247889	0.242854	0.512294	0.622891	0.598562	0.563797	0.318284	0.634899	0.269807	0	0.340657	1.47843	0.261058	0.438315	0.488209	0.486352	0.496922	0.499916	0.553708	0.586915	0.316676	0.329991	0.696835	0.403173	0.341695	0.456881	0.497891	0.413132	0.453799	0.228086
594	nfsB	0.000589809	0	0	0.00380699	-0.0111318	0	0	0	0	0	0	0	0	0	0	0	-0.182819	0	0	0	0	0	0	0	-0.2183	0.0730416	0	0	-0.0759979	0	-0.0379785	0	-0.0399214	0	0.02107	0	0	0.0445658	0	-0.00686703	-0.17947	0	0	0	-0.104089
595	ybdF	0.036423	0	0	0	-0.379099	-0.0731405	-0.0819515	0	-0.113706	-0.108757	-0.190057	0	0.0947034	0	0	-0.376992	-0.0913784	-0.064388	-0.0775386	-0.0997523	-0.00105989	-0.107893	-0.331429	0	0	0	-0.359027	0.18314	0	-0.0863792	-0.179617	-0.138828	-0.103826	-0.00718203	0	0	0	0	-0.163423	-0.168765	0	-0.0775386	-0.101858	-0.117797	0
596	ybdJ	0	0	0	0	0	0	0	0	0	0	0	0	0	0	0	0	-0.386614	0	0	0	0	0	0	0.239593	0.17518	-0.0158149	0	0	0	0	0	0	0	0	0.0307448	0.314902	-0.26183	0.180402	0	0	0	0	0	0	0
597	ybdK	-0.0060947	-0.610727	-0.671695	-0.79349	-0.657676	-0.513057	-0.516833	-0.590964	-0.528255	-0.528255	-0.528255	-0.343234	-0.741674	-0.571468	-0.757213	0	-0.348721	-0.509306	-0.514942	-0.524462	-0.625023	-0.674313	-0.272441	-0.514878	-0.900323	-0.143213	-0.656467	0.989687	-0.307123	-0.518731	-0.537088	-0.266719	-0.346872	-0.624666	-0.64776	0	-0.670825	-0.636907	-0.532403	-0.529852	0.0413317	-0.514942	-0.23965	-0.532196	-0.801743
598	sokE	0	0	0	-0.222941	0	0	0	0	-0.0051032	-0.000153986	-0.0814541	-0.16012	-0.158171	0	0	0	-0.290553	0	0	0	0	0	-0.153058	-0.124675	-0.069391	0	0	0	-0.163097	0	-0.101044	0	0	-0.019092	-0.040778	-0.0292054	0	-0.0272117	-0.0600042	-0.0655911	-0.220029	0	0	0	0
599	hokE	0	0	0	0	0	0	0	0	0	0	0	0	0	0	0	0	0	0	0	0	0	0	0	0	0	0	0	0	0	0	0	0	0	0	0	0	0	0	0	0	0	0	0	0	0
600	insL1	0	0	0.106576	0	0.0021995	0	0	0.308329	0	0	0	0	0	0	0.0305604	-0.303687	0	0	0	0	0.147435	1.68872	0	0	0	0	0.129578	-0.0377797	-0.373285	0	0	0.310213	0.155648	0	0	0	0.319056	0	0	0	0	0	0	0.16077	0.182359
601	entD	-0.201032	1.06829	0.954029	0.811208	1.26379	1.11719	1.10754	0.933884	1.07325	1.5782	1.4969	0.949072	0.884614	1.10754	0.906519	0.289256	0.850782	1.12678	1.11238	1.08805	0.979566	0.0884082	1.30127	0.789243	0.682792	0.991664	0.718405	0.655163	0.656561	1.1027	0.975839	0.831302	0.838458	1.04319	1.01766	0.970525	0.586829	1.03303	1.01766	1.0125	0.946368	1.11238	1.03812	0.9879	0.751393
602	fepA	-0.229649	0.635991	0.575023	0.878914	0.332599	0.684901	0.675251	0.655754	0.640957	1.14591	1.06461	0.516778	0.45232	0.675251	0.489505	0.649443	1.12601	0.694487	0.680084	0.655754	0.620989	1.00048	0.368971	0.856949	0.250498	0.55937	0.3509	0.222869	1.38523	0.670401	0.543545	0.554114	0.483988	0.6109	0.585365	0.538231	0.814063	0.60074	0.585365	1.0802	1.30656	0.680084	0.605829	0.635991	0.410278
603	fes	-0.316116	0.324512	0.0260658	0.253372	0.126196	0.134412	0.130166	0.141588	0.115077	0.244051	0.241482	0.0604379	0.0520764	0.130166	0	-0.231776	-0.38281	0.13863	0.132292	0.121588	0.186291	0.180062	0.215393	-0.065641	0	0	0.251003	-0.236396	0	0.128032	0.405809	0.236866	0	0.181852	0.0906162	0.0698773	0.335918	0.0973813	0.0906162	0.33372	0.245002	1.30831	0.29435	0.112892	0.113578
604	ybdZ	0	0	0.30533	0.0709282	0.234183	0.164442	0.157493	0.403456	0.132802	0.199764	0.15783	0.0433931	0.256983	0.157493	0.500662	-0.286381	-0.0198567	0.171343	0.160973	0.143456	0.158425	0.0950543	0.443208	0.103843	0.414207	0.825741	0.305737	0	0.415176	0.154002	0.229462	0.150275	0.321791	0.151161	0.0927758	0.0588394	0	0.103846	0.0927758	0	0.134323	0	0	0.129227	0.266713
605	entF	-0.409185	1.49847	1.76139	1.56528	1.51896	1.87127	1.86162	1.84212	1.82732	1.83227	1.74344	1.70314	1.52136	1.86162	1.67587	0.815672	0.596664	1.80909	1.86645	1.84212	1.80735	1.68684	1.55534	1.47674	1.43686	1.43018	1.53727	0.909235	2.53852	1.85677	1.72991	0.979947	1.67035	1.79727	1.77173	1.7246	2.50043	1.78711	2.77173	1.65149	1.70044	1.86645	1.7922	1.75697	0.229998
606	fepE	0.0284897	0.323891	0	0	0	0	0	0	0	0	0.00752913	0	0.117326	0	0	0.227656	0.215709	0.0717605	0	0	0	0	0	0.0665726	0	0.315552	0	-0.0661407	0.457072	0	0	0.760533	0	0	0	0	0	0	0	0.115076	0	0	0	0.0653913	1.36665
607	fepC	-0.0910204	0.599875	0.201611	0.319869	0.336432	0.229172	0.22017	0.316608	0.188181	0.192798	0.300374	0.145067	0.0900827	0.220124	0.196773	0.0519309	0.0763343	0.19587	0.224679	0.192337	0.233729	0.225851	0.0688547	0.174352	0.14735	0.163675	0.525559	0.175207	0.301518	0.215647	0.172363	0	0.442733	0.24424	0.218297	0.378903	0.314366	1.25269	0.472711	0.0460445	0.261809	0.308775	0.134139	0.145054	0
608	fepG	0	1.05349	0	0	0	0	0	0.0207164	0	0	0	0	0	0	0	0	-0.132843	0	0	0	0	0	0	0	0	0	0	0	0	0	0	0	0	0	0	0	0	0	0	0	0.247481	0	0	0	0
609	fepD	-0.284002	0.167371	0.722972	0.535534	0.780988	0.71077	0.70299	0.772446	0.675344	0.679334	0.945072	0.702556	0.767595	0.703544	0.754813	0.63073	0.404952	0.7231	0.706886	0.803033	0.889145	0.537529	0.843425	0.552137	0.479806	0.781501	0.538429	0.720849	0.192315	0.699081	0.696211	0.57859	0.737082	0.641951	0.646844	0.738927	0.823355	0.52341	0.593879	0.846402	0.784323	0.697724	0.902308	0.675534	0.916452
610	entS	-0.213647	1.38607	1.13609	1.53361	1.15144	1.23271	1.22786	1.18308	1.21061	1.2131	1.42412	0.975213	1.1477	1.22511	1.05171	0.827755	1.20471	1.23564	1.23029	1.14408	1.31147	1.17845	0.862424	0.91352	1.25642	1.28414	1.27621	0.352578	0.778117	1.22542	1.12713	1.35426	0.989803	1.19927	1.5601	1.07619	0.772996	1.23695	1.19771	1.4151	1.53675	1.23405	1.08814	1.2064	1.10673
611	fepB	0.241626	0.618286	0.45216	0.443862	0.632204	0.542849	0.534416	0.521884	0.504448	0.508773	0.515703	1.00614	0.691317	0.54704	0.382759	0.587994	0	0.551469	0.538639	0.655744	0.47271	0.238513	0.549309	0.816291	0.71418	0.516552	0	0.113177	0.134503	0.530178	0.393093	0.545531	0.700184	0.477697	0.536075	0.535772	0.762047	0.475576	0.453928	0.421076	0.343331	0.538155	0.487254	0.50033	0.388236
612	entC	0	0.0606958	0.151939	0.251932	0.0787684	0.20883	0.203945	0.193003	0.186585	0.189091	0.272226	0	0.245447	0.105702	0.107379	0.214072	0	0.213625	0.206392	0.161132	0.179879	2.22238	0	0.62376	0.509164	0.363522	2.54916	0	-0.583608	0.201491	0.381613	0.0195349	0.170718	0.171485	0.139346	0.248609	0.11818	0.0694952	0.158905	0.16304	0.134315	0.206507	0.165588	0.184019	0.374726
613	entE	0.308816	1.10941	0.811945	0.575838	0.798789	0.899066	0.89137	0.87625	0.86402	0.867967	0.953413	0.814475	0.651838	1.13067	0.744251	0.586022	0.123704	0.906734	0.895224	0.888999	0.846735	0.226212	0.666669	0.405142	1.06152	0.711658	0	0.684951	0.238956	0.887502	0.688597	1.044	0.913398	0.840003	0.827324	0.936485	0.881481	1.07064	0.8195	0.812684	0.758045	0.895178	0.837291	0.860081	0.875078
614	entB	-0.0834697	0.100901	0.0968417	0.382294	0.20669	0.17925	0.297012	0.115724	0.229626	0.275004	0.214029	0.376278	0.161268	0.172012	0.157703	0.00178953	0	0.186439	0.133971	0.115724	0.131316	0	0.733291	1.12226	0.00990149	0.408222	0.326485	0	0.178537	0.168375	0.323233	0.08116	0.153565	0.12375	0.0629315	0.319248	0	0.710237	0.229598	0.30906	0.42613	0.175637	0.244946	0.142568	0.0566165
615	entA	0	0	0	0	0	0	0	0	0	0	0	0	0	0	0	0	0.460854	0	0	0	0	0	0	0	0	0	1.00913	0	0.476899	0	0	0	0	0	0	0	0	0	0	0	0	0	0	0	0
616	entH	-0.349636	1.22918	1.05845	1.05441	1.00163	1.14086	1.09196	1.244	1.19124	1.06995	1.00897	0.907062	1.02538	1.13362	0.952647	0.630067	0.337184	1.14805	1.26225	1.244	1.09293	1.1273	1.36157	0.498574	0.874018	0.939006	0	1.28217	0.268561	1.12999	0.95151	1.04277	1.28184	1.08536	1.19121	0.947525	1.05199	1.67185	1.02454	1.104	0.88774	1.13725	1.03989	1.10418	1.01823
617	cstA	0	0	0	0	0	0	0	0	0	0	0	0	0	0	0	0	0	0	0	0	0	0	0	0	0	0	0	0	0	0	0	0	0	0	0	0	0	0	0	0	0	0	0	0	0
618	ybdD	0.257089	0.421718	0.471861	0.275752	0.451659	0.470628	0.460977	0.441481	0.537795	0.431634	0.461445	0.413616	0.349158	0.460977	0.451339	0.282296	0.686082	0.480214	0.465811	0.441481	0.406716	0.508425	0.182214	2.2395	1.0944	0.345097	0.136627	0	-0.157579	0.67835	0.548726	0.803166	0.380826	0.572734	0.371092	0.710887	0.322012	0.386467	0.482203	0.36593	0.475908	0.465811	0.502667	0.421718	0.418227
619	ybdH	0	0	0	0	0	0	0	0	0	0	0	0	0	0	0	0.103364	0	0	0	0	0	0	0.18809	0	0	0	-0.00492574	-0.315964	0	0	0.152469	0	0	0	0	0.129409	-0.0417625	0	0	0	0	0	0	0	0
620	ybdL	-0.662476	0.537681	0.476713	0.280604	0.66286	0.586591	0.576941	1.66068	0.542647	0.690454	0.466296	0.704182	0.496867	0.576941	0.391195	0.0295994	0.43083	0.596177	0.581774	0.557444	0.522679	2.02367	0.718353	1.79362	0.521468	0.603917	0.395447	0.05313	1.58456	0.572091	0.566311	0.455804	0.528535	0.51259	0.629912	0.421434	0.215753	0.728853	0.487055	0.62475	0.747468	0.581774	0.507519	0.537681	0.454825
621	ybdM	-0.0197826	-0.949977	-0.95539	-1.18935	-0.0447646	-0.928846	-0.938496	0.0586792	-0.945011	-0.578951	-0.771362	-0.68711	-0.994759	-0.799607	-0.825494	-0.787858	-0.613825	-0.919259	-0.933663	-0.825912	-0.909424	0.00429879	-0.131266	0	-0.0680984	-0.704794	-0.700584	-0.91138	0	-0.943345	-0.764646	-1.03185	-0.9699	-0.931042	-0.66727	-0.776768	-0.586635	-0.456809	-0.91727	-0.477987	-0.454692	-0.878107	-0.869028	-0.699977	-1.49277
622	ybdN	-0.211693	-1.38059	-1.01947	-0.924836	-1.31714	-1.31114	-1.31114	-1.427	-1.38059	-1.28336	-0.505586	-1.0433	-1.22781	-1.15836	-0.765527	-0.829781	0	-1.31114	-1.31114	-0.84886	-1.01947	3.75666	0.28448	-1.67633	0.468743	-1.6851	-0.555834	-0.0989204	-0.432324	-1.31114	-1.57503	-1.38059	-0.918305	-1.49065	-1.21392	-0.765527	-0.140316	-1.90915	-1.08892	-1.70003	-1.76263	-1.45003	-1.15836	-1.50559	-0.587875
623	ybdO	0.239825	-0.493613	-0.749025	-0.153338	-0.234641	-0.597481	-0.607131	-0.610076	-0.488647	-0.497586	-0.689998	-0.803866	-0.413395	-0.343242	-0.44225	0.249705	0	-0.587895	-0.602298	-0.692668	-0.70306	0	-0.588579	-0.343468	-0.601709	-0.300309	0	-0.24828	-0.536889	-0.611981	-0.558281	-0.57549	-0.711656	-0.276557	-0.710906	-0.393524	0.333497	0	-0.585906	-0.646623	-0.70381	-0.296743	-0.412664	-0.618613	-0.46329
624	dsbG	-0.0733678	0	0	-0.017416	0	0	0	0	0	0	0	0	0	0	0	0.151611	-0.327825	0	0	0	0	-0.0264762	0	-0.0412032	-0.0508135	0	-0.301053	-0.137859	-0.254581	0	0	0	0	0	0	0	0	-0.0512121	0	0	0	0	0	0	0
625	ahpC	-0.0916206	0.519065	0.477	0.404845	0.245319	0.452098	0.442949	0.538518	0.553677	0.41513	0.477326	0.399852	0.293611	0.442949	0.402225	0	0	0.461186	0.440137	0.425617	0.390851	0.354084	0.269889	0.184876	0.481748	0.51282	0.17988	0	-0.100708	0.430989	0.383765	0.323976	0.468136	0.565403	0.355227	0.635591	0.730158	0.442031	0.350649	0.350066	0.283936	0.51949	0.375692	0.40573	0.174366
626	ahpF	0.203006	-0.376318	-0.237286	-0.433395	-0.27971	-0.327409	-0.337059	-0.356555	-0.371352	-0.366403	-0.247703	-0.178539	-0.559989	-0.337059	-0.522804	-0.955348	-0.986302	-0.317822	-0.332226	-0.356555	-0.39132	0.420362	-0.643338	0.77205	-0.561811	-0.452939	-0.461409	-0.606691	-0.328225	-0.341908	-0.468764	-0.458195	-0.528321	-0.401409	-0.226944	-0.474078	-0.298246	-0.411569	-0.426944	-0.432106	-0.498235	-0.332226	-0.40648	-0.376318	-0.285038
627	uspG	0	0	0.150403	0	0	0.0373156	0.0302943	0.00434191	0	0.0089441	0	0	0	0.0302943	0	0	0	0.0442903	0.137325	0	0	0.407199	0.165225	0	0	0.0147395	0.172352	-0.272955	-0.572873	0.12984	0.0149927	0	0	0	0	0	0	0	0.0641019	0	0	0.0263865	0	0.00172976	0.0808424
628	ybdR	-0.11931	0	0	0	0	0	0	0	0	0	0.00612397	0.298	0	0	0	-0.0311606	-0.496217	0	0.00121168	0	0	0	0	-0.0186584	0.548072	0	0	0	0	0.00246333	0	0	0	0	0	0	-0.0687319	0	0.0134559	0	0	0	0	0	0
629	rnk	0	0.483726	0.399619	0.733184	0.33418	0.526894	0.518324	0.502821	0.488692	0.492265	0.6093	0.349743	0.453901	0.518324	0.33724	0.455072	0	0.535407	0.506318	0.657335	0.468724	0.285565	0.191287	0.622088	0.374315	0.48176	0.110297	0.193903	0.0746341	0.497402	0.465896	0.401849	0.530566	0.458635	0.4331	0.462889	0.161798	0.448475	0.419098	0.427938	0.361808	0.523759	0.530487	0.48346	0.367496
630	rna	-0.0287501	0	0	0	0	0	0	0	0	0	0	-0.0879292	-0.046795	0	-0.00970398	0	-0.18035	0	0	0	-0.0252189	-0.00529838	-0.294339	-0.245014	0	-0.0481057	0.298581	0.048619	1.03393	0	0	-0.052999	0	-0.00012922	-0.0249415	0	-0.201888	-0.0118185	-0.0247854	0	-0.0961057	0	-0.00485049	0	-0.153201
631	citT	0.366047	-0.592107	-0.640767	0	-0.891285	-0.543198	-0.541299	-0.572344	-0.587141	-0.498375	-0.301267	-0.680377	-0.736298	-0.552848	-0.735359	-0.669669	-1.41277	-0.533612	-0.548015	-0.572344	-0.26537	-0.669703	-0.0943474	-0.68916	-0.310934	-0.652693	0.40522	0.447527	0	-0.554115	-0.309119	-0.656318	-0.704378	-0.617155	-0.624383	-0.653207	-0.499206	-0.601861	-0.625944	-0.647895	-0.625654	-0.548015	-0.620652	-0.592107	-0.0926588
632	citG	0	0.0799793	0.0190112	0.0578989	0	0.128889	0.119239	0.0997425	0.0849455	0.0445388	0.0995037	0.0516752	0	0.119239	0.259399	0	0	0.138475	0.124072	0.190652	0.246795	0	0.848625	0	0.806784	0.14687	0.439127	0	0	0.114389	0	0.17992	0.0188853	0.0548883	0.0293532	0.0731283	0	0.0447284	0.0293532	0.0241915	0.048971	0.124072	0.231635	0.0799793	0.126994
633	citX	0.0765339	0	-0.0369248	-0.0911521	-0.0126437	0	-0.0346461	0	0	-0.25145	-0.0866753	-0.00490048	-0.0716462	0	0	-0.519442	-0.387606	0	0	0	0	-0.168458	0	-0.300953	0.612138	0.207342	0	-0.121957	-0.766797	-0.0107472	-0.126304	0	-0.119198	0	-0.0301092	-0.10998	-0.0426003	-0.064674	-0.0255823	0	-0.169005	0	0	0	-0.0222828
634	citF	0	-0.567408	-0.456385	-0.35296	-0.615968	-0.531086	-0.399754	-0.526458	-0.419112	0.249458	-0.361996	-0.40544	-0.408573	-0.538252	-0.552846	-0.198367	-0.320677	-0.523966	-0.534663	-0.552731	-0.498893	-0.387408	0	-0.101272	-0.0421808	0.127864	-0.562383	-0.345031	-0.341498	-0.470436	-0.575965	-0.60006	-0.468348	-0.46962	-0.587861	-0.485573	-0.582195	-0.523671	-0.63373	-0.485448	-0.211731	-0.534663	-0.519643	-0.546554	-0.664711
635	citE	0	-0.162997	-0.143502	-0.235543	-0.227083	-0.137823	-0.115205	-0.205371	-0.116324	0	-0.282137	-0.122149	-0.207057	-0.14279	0	-0.324802	0	-0.132889	-0.140303	-0.152825	-0.163366	0	0	0	0	-0.224176	-0.312404	-0.272941	0	-0.108917	0	-0.0775665	-0.15158	-0.242088	-0.179094	-0.22721	-0.34948	-0.0370367	-0.10176	-0.207383	-0.344442	-0.140303	-0.152185	-0.163539	-0.209021
636	citD	-0.0482761	0	-0.084359	0	0	0	0	0	0	0.177113	0	0	-0.0435656	0	-0.0814012	0	-0.109607	0	0	0	0	0	-0.253356	-0.171042	-0.103695	0	0	-0.180078	-0.0230239	0	-0.0251316	-0.0258201	-0.0617178	0	-0.013684	0	-0.067148	-0.0627241	0	-0.0966645	0	0	0	-0.0617483	-0.0271993
637	citC	-0.162772	-0.155815	0	-0.144877	-0.261242	-0.116975	-0.0690062	0	-0.102852	-0.211099	0	-0.224701	0	-0.124639	-0.1799	-0.093866	-0.00814446	-0.109363	-0.120801	-0.140121	-0.104003	-0.184198	-0.31913	-0.252695	-0.365047	-0.00796528	-0.159682	-0.199244	-0.354519	-0.143038	-0.163373	-0.148987	-0.204574	-0.0826033	-0.19088	-0.122226	-0.0250516	0	-0.097603	0	-0.0718218	-0.120801	0	0	-0.0393216
638	citA	-0.51108	-1.67668	-1.23765	-0.933757	-0.980072	-1.62777	-1.63742	-1.65692	-1.67171	-1.66676	-1.24806	-0.795893	-1.06787	-1.63742	-0.530685	-0.225994	-0.490505	-1.61818	-1.63259	-1.65692	-1.19168	-1.8122	-1.9437	-1.16324	2.84871	1.03918	-1.96177	-1.0898	-0.342478	-1.64227	-0.269126	-1.75856	-1.82868	-1.20177	-1.72731	-1.27444	0.293873	-1.21193	-1.22731	0.220977	-1.7986	-1.63259	-1.70684	-1.17668	-1.90239
639	citB	-0.432796	0.131006	0	0	0	0	0	0	0	0	0	0.364292	0	0	0	0	-0.270749	0	0	0.147649	0	0.016888	0	1.3366	0	0	0	0.191265	-0.789482	0	0	0.185207	0	0	0	0	0	2.30982	0	0	0.659918	0	0	0	0
640	dcuC	-0.826903	1.45619	1.42797	1.6281	1.68554	1.53785	1.5282	1.5087	1.4939	1.74885	1.66755	1.27865	1.30527	1.5282	1.59245	1.70991	1.88992	1.54743	1.53303	1.47179	1.47393	1.3492	1.47192	1.12574	1.49968	1.41232	1.70385	1.17424	2.22439	1.52335	1.39649	1.36076	1.58693	1.46385	1.43831	1.64118	1.81325	0.876232	1.43831	1.43315	1.20204	1.53303	1.45877	1.73894	1.51322
641	pagP	0	0.519374	0.519374	0.519374	0	0.519374	0.519374	0.519374	0.519374	0.519374	0.519374	0.519374	0.519374	0.519374	0.519374	0.519374	0.519374	0.519374	0.519374	0.519374	0.519374	0.519374	0.519374	0.519374	0.519374	0.519374	0.519374	0.519374	0.519374	0.519374	0.519374	0	0	0.519374	0.519374	0.519374	0.519374	0.519374	0.519374	0.519374	0.519374	0.519374	0.519374	0.519374	0.519374
642	cspE	-0.830018	2.36963	2.34337	1.74531	2.98184	2.38258	2.38002	2.38373	2.35918	2.37225	2.33816	2.31424	2.28201	2.38002	2.05061	1.28715	0.972617	2.38572	2.3813	2.37486	2.36432	2.30609	2.24034	2.43244	2.1811	2.50523	2.2313	1.81547	1.19555	2.39106	2.32763	3.92449	3.05754	2.3613	2.34446	2.32497	1.67015	2.35622	2.1488	2.09596	2.31289	2.3813	2.35877	2.37385	2.07161
643	flc	-0.0345828	0.375573	0.34931	0.751256	0.228098	0.388519	0.385965	0.389676	0.365123	0.378197	0.344102	0.320188	0.287959	0.385965	0.556551	0.687469	0.771043	0.391669	0.387244	0.380804	0.37026	0.312037	0.246284	0	0.187048	0.0111731	0.237249	0.0250555	0.146369	0.396999	0.333571	0.00978183	0.303793	0.367249	0.350407	0.330914	0.76157	0.362169	0.0622729	0.6019	0.318836	0.387244	0.364713	0.379794	0
644	ybeM	0	0.00844297	0	0	0	0.0314593	0.026918	0	0.0343094	0.0131091	0	0	0	0.026918	0	0	0	0.0347463	0.0291924	0.0177433	0.0040673	0	0	0.0421662	0	0.160621	0	0	0	0	0	0.158148	0	0	0.00814835	0	0	0	0.491946	0	0	0.0291924	0	0	0.456325
645	tatE	-0.0658229	0.331243	0.29185	0.394768	0.110032	0.350663	0.346832	0.352398	0.315568	0.33518	0.284037	0.248166	0.199822	0.346832	0.352711	0	0.0282079	0.355388	0.348751	0.339091	0.323274	0.235939	0.137311	0.456264	0.0484557	0.534644	0.123757	0	0.0701268	0.363383	0.268241	0.532557	0.223573	0.318757	0.293495	0.264256	0.782019	0.311137	0	0.420735	0.246138	0.348751	0.314954	0.337576	0
646	lipA	-0.0211707	0.717253	0.876626	0.398987	0.593668	0.736673	0.732841	0.886717	0.701578	0.72119	0.975864	0.69747	0.689413	0.732841	1.03311	0.515572	0.43226	0.741397	0.73476	0.7251	0.709283	0.695432	0.678994	0.342274	0.664185	0.420653	1.56532	0.420438	-0.0693087	0.888548	0.700816	0.418566	0.693371	0.88111	0.679504	0.700152	0	0.707965	1.1086	0.580398	0.955951	0.73476	0.708601	0.884247	1.04358
647	ybeF	0.0802453	0.701942	0.624702	0.69637	0.958814	0.739343	0.731964	0.68525	0.893975	0.709524	0.598609	0.612268	0.563925	0.731964	0.977434	0.818715	0.763611	0.736882	0.73566	0.717055	0.615947	0.600042	0.501413	0.493714	0.412558	0.649231	0.326299	0	-0.0531345	0.696235	0.632343	0.645212	0.587676	0.65161	0.851463	0.628358	0.548639	0.67524	0.554082	0.659837	0.363028	0.73566	0.679056	0.670428	0.477735
648	lipB	-0.100606	0	0	0	0	0	0	0	0	0	0	0	0	0	0	0	0	0	0	0	0.0959962	0	0	0	0	0	0	0	0	0	0	0	0	0	0	0	0	0	0	0	0.279263	0	0	0	0.0364962
649	ybeD	0	0	0	0	0	0	0	0	0	0	0	0	0	0	0	-0.0168376	-0.104935	0.0520212	0	0	0.125913	0	-0.0169652	0	-0.135439	0	-0.0350368	0.209157	-0.57506	0	0	0	0	0	0	0	0	0	0	0	0.263057	0	0	0	0
650	dacA	0	0.671965	0.649617	0.417674	0.240137	0.702174	0.696214	0.700074	0.580915	0.67809	0.652247	0.597589	0.557303	0.696214	0.387733	0	0	0.66097	0.699199	0.684172	0.478051	0.5874	0.50521	0.497037	0.431164	0.621699	0.574695	1.06162	0	0.709228	0.614318	0.618453	0.577095	0.67204	0.546579	0.610997	0.926688	0.650065	1.19527	0.63723	0.177185	0.699199	0.653246	0.687722	0.52186
651	rlpA	0.139191	0.509167	0.448199	0.363201	0.492993	0.558077	0.548427	0.751153	0.625244	0.519083	0.437782	0.389954	0.436607	0.548427	0.362681	0.0634708	0.377726	0.567663	0.55326	0.52893	0.605276	0.373652	0.353258	0.946415	0.522003	0	0	1.03796	0.00521177	0.543577	0.527832	0.603397	0.579386	0.484076	0.458541	0.633629	0.474457	0.473916	0.458541	0.453379	0.720583	0.55326	0.479005	0.509167	0.616788
652	mrdB	0	-0.355373	-0.416341	-0.326736	-0.146628	-0.306463	-0.0896904	-0.192753	-0.350407	-0.345458	-0.141043	-0.331729	-0.25333	-0.316114	-0.501859	-0.193694	-0.0469544	-0.296877	-0.31128	-0.33561	-0.227518	-0.348031	-0.336678	0.541616	-0.371586	1.33187	2.08355	-0.303512	-0.230685	-0.320963	-0.0785389	-0.0679697	-0.364519	-0.237607	-0.405999	-0.453133	0	-0.390624	-0.263142	-0.411161	-0.191576	-0.168423	-0.385535	-0.212516	-0.152514
653	mrdA	-0.156006	0.265677	0.229096	0.111431	0	0.295023	0.289233	0.277535	0	0.271627	0.222846	0.194149	0.155475	0.289233	0.177786	0	0	0.300775	0.292133	0.277535	0.256676	0.184368	0.105465	0.0982519	0.0343813	0.0197045	0	-0.0157645	0.16962	0.286323	0.21021	0.216551	0.174475	0.250623	0.235302	0.207021	0.67252	0.244527	0.835302	0	0.192527	0.292133	0.24758	0.265677	0.13025
654	rlmH	-0.0762484	1.26336	1.21459	1.0577	1.38186	1.30249	1.29477	1.27917	1.88521	1.27129	1.20625	1.16799	1.11642	1.29477	1.14617	1.10121	1.53692	1.31016	1.29864	1.27917	1.25136	1.15495	1.04975	1.04013	0.954967	1.60206	2.00261	0.772131	1.21699	1.29089	1.1894	1.19786	1.14176	1.24329	1.22286	1.18515	0.805819	1.23516	1.02286	1.9628	1.16583	1.29864	1.23923	1.26336	1.08279
655	rsfS	0	0	0	0	0	0	0	0	0	0	0	0	0	0	0	0	0	0	0	0	0	0	0	0	0	0	0	0	0	0	0	0	0	0	0	0	0	0	0	0	0	0	0	0	0
656	cobC	0.0316995	1.03803	0.677243	0.780949	0.484634	0.836935	0.827285	0.807789	0.792992	0.797941	0.716641	0.918813	0.604355	0.827285	0.64154	0.258996	0	0.846521	0.832118	0.807789	0.773024	0.33353	0.771006	0	0.351625	0.711405	0	0.124903	-0.114639	0.822436	0.69558	0.706149	0.636023	0.762935	0.7374	0.690266	0.862338	0.580178	0.7374	0.732238	0.666108	0.832118	0.757864	1.03803	0.562313
657	nadD	0.050557	0	0.0498149	0	0	0	0	0	0	0	0	0	0	0	0	-0.292636	-0.495775	0	0	0	0	-0.0570686	0	0.357372	0	0	1.93582	-0.2302	0.0866644	0	0	0	0	0	0	0	0	0	0	0	0	0	0	0	0
658	holA	0	-0.109392	0	0	-0.295594	-0.152285	0	-0.0454971	0	-0.168147	-0.116473	0	-0.404174	-0.0375665	0	0	0	-0.148386	0	-0.0454971	-0.178283	0.637961	0	0	-0.318778	0	0	0	0.102139	0	-0.0911417	-0.126273	-0.150284	-0.0637429	-0.192774	-0.0933032	-0.255213	-0.255754	-0.0741301	-0.0762298	-0.221774	-0.0356005	-0.0658057	0	-0.248652
659	lptE	0.140375	0	-0.0568686	-0.502978	-0.293529	-0.0248247	-0.123308	-0.199597	-0.157601	-0.054566	-0.0826763	-0.28178	0	-0.184727	-0.22572	-0.167881	-0.084225	-0.0175133	-0.118475	-0.199597	-0.073571	0	-0.346254	0.657336	0.203632	-0.190442	0.292441	-0.360072	-0.0362379	-0.0448239	-0.285181	0	0	-0.233808	-0.100742	-0.289234	0	0.690388	-0.253284	-0.257221	-0.155116	-0.181041	-0.237676	-0.245901	-0.111153
660	leuS	-0.186217	0.558322	0.497354	0.301245	0.25493	0.607232	0.597582	0.578085	0.563288	0.568238	0.486937	0.439109	0.374651	0.597582	0.411836	-0.136767	0.340819	0.616818	0.602415	0.578085	0.54332	0.422807	0.291302	0	0.0710131	0.481701	0.12701	-0.174765	-0.0428025	0.592732	0.465876	0.476445	0.406319	0.533231	0.507696	0.460562	0.736394	0.177877	0.507696	0.502534	0.436405	0.602415	0.52816	0.558322	0.332609
661	ybeL	-0.178338	0	0	0	0	0	0	0	0	0	0	0	0	0	0	0	-0.234026	0	0	0	0	0	0	0	0	0	-0.0931062	0	-0.21272	0	0	0	0	0	0	0	0	0	0	0	0	0	0	0	0
662	ybeQ	-0.195479	-1.07861	-1.10696	-0.661701	-1.1304	-0.984631	-1.13176	-1.06132	-0.998082	-1.06994	-0.914889	-1.1433	-0.626823	-1.19426	-0.893102	-0.342889	-0.577916	-1.11493	-1.12753	-1.14882	-1.01555	-1.19719	-1.27357	-0.468292	-0.529222	-0.724921	-1.13009	-0.752556	-0.674416	-0.961002	-1.08332	-0.924069	-1.12411	-1.05057	-0.959225	-1.22665	-0.781746	-0.993787	-0.984225	-0.949117	-1.07279	-1.12753	-1.1675	-1.07861	-0.355949
663	ybeR	0	-0.358652	-0.256515	-0.199236	-0.196484	-0.376871	-0.281429	-0.351241	-0.26835	-0.354933	-0.546981	-0.205236	-0.865028	-0.0939295	-0.637644	-0.722488	-0.356995	-0.274216	-0.279617	-0.288741	-0.275838	-0.40947	-0.0578443	-0.930779	-0.850852	0	0	-0.517972	-0.740685	-0.408248	-0.304879	-0.550916	-0.478153	-0.118061	-0.351697	-0.207812	-0.464055	-0.454491	-0.476697	-0.280512	-0.341871	-0.279617	-0.182462	-0.358652	-0.588415
664	djlB	0	0.871137	0.810169	0.769472	1.02999	0.720047	0.910397	0.6909	0.876103	0.681053	0.599752	0.551924	0.804459	0.710397	0.724651	0	0.412733	0.729633	0.71523	0.6909	1.05613	2.62359	0.404117	2.46353	0.285644	0.594516	0.703038	0.675007	0.595739	0.705547	0.578691	0.58926	1.03613	0.646046	0.620511	0.773377	0.949209	0.635886	0.820511	1.01535	0.54922	0.71523	0.640975	0.671137	0.645424
665	ybeT	0	0	0	0.0557347	0.0613735	0	0	0	0	0	0	0	0	0	0	-0.140014	0.0605247	0	0	0	0	0	0	0.0599821	0	0	0	0	0	0	0	0	0	0	0	0	0	0	0	0	0	0	0	0	0
666	ybeU	-0.572284	-0.0877207	-0.169935	0	0.0094128	-0.147665	0	-0.0984429	-0.184661	-0.0407564	-0.312428	-0.0794562	0	-0.118444	0	-0.0794441	-0.00868472	-0.106043	-0.217986	-0.172509	-0.195172	-0.299022	-0.273066	-0.19418	-0.338361	-0.312499	-0.126063	0	0.131728	-0.157988	-0.106893	-0.147402	-0.0738519	-0.306063	0	-0.233987	-0.0822946	-0.131413	-0.12341	0	-0.217626	-0.217986	-0.276479	-0.256917	-0.108961
667	djlC	0	-0.228848	-0.150946	-0.374392	0.329497	-0.163051	-0.109456	-0.117068	-0.188523	-0.169706	0	-0.362933	-0.219916	-0.305576	-0.0440435	-0.278161	-0.701174	-0.280514	-0.256203	-0.178827	-0.223201	-0.2843	0.337629	0	1.33001	-0.352274	-0.605272	0	-0.163777	-0.178365	-0.107543	-0.115246	-0.308724	-0.186928	-0.34013	-0.384325	-0.039172	-0.00290816	-0.283615	-0.449511	-0.19956	-0.256203	-0.313995	-0.27513	-0.255273
668	hscC	-0.221722	-0.614743	-0.617934	-0.881705	-0.449775	-0.586901	-0.599097	-0.410727	-0.642149	-0.61371	-0.710501	-0.505691	-0.611332	-0.478682	-0.689596	-1.0371	-0.520848	-0.56832	-0.580917	-0.632697	-0.478233	-0.70141	0	-0.713617	-0.977234	-0.519168	-0.67772	-0.805625	-0.244259	-0.548597	-0.311065	-0.610053	-0.72053	-0.562819	-0.332005	-0.656491	-0.650497	-0.664458	-0.470409	-0.394026	-0.58588	-0.580917	-0.553601	-0.690621	-0.75965
669	rihA	-0.124191	-0.379531	-0.161653	-0.0659613	-0.182253	-0.338046	-0.344444	-0.414172	-0.30059	-0.369891	-0.119716	-0.077499	0	-0.376555	-0.372723	-0.201814	-0.254638	-0.333415	-0.344459	-0.288313	-0.297603	0	-0.504818	-0.432207	0	-0.175975	0	-0.630423	-0.168493	-0.229427	-0.352958	-0.395992	-0.236658	-0.351802	-0.372221	-0.244697	-0.21393	0	-0.40198	-0.188513	-0.221017	-0.344459	-0.359331	-0.159297	-0.34514
670	gltL	0.0692171	0	0	0	0	0	0	0	0	0	0.0538158	0	0	0	0	0.191144	0.0459615	0	0	0	0	0.690153	0	0	0.469812	0	0	0	0	0	0	1.2937	0	0	0	0	0	0	0	0	0	0	0	0	0
671	gltK	0.0853601	0.668375	0.516807	0.403171	0.709618	0.498207	0.489882	0.473061	0.525655	0.464565	0.275498	0.881481	0.933822	0.489882	0.488832	0.25824	0.163239	0.506478	0.494051	0.473061	0.443068	0	0.493615	0.430154	0	0.723239	0.0448815	0.141478	0.412803	0.485698	0.376253	0	0.400034	0.434364	0.54632	0.505656	0.446243	0.604536	0.556124	1.02221	0.795922	0.494051	0.505152	0.52137	0.420554
672	gltJ	-0.0649884	0.291943	0.563742	0.649658	0.258038	0.420854	0.41688	0.408852	0.540014	0.404797	0.58459	0.351627	0.611257	0.41688	0.529458	0.556827	0.183157	0.424801	0.41887	0.408852	0.394537	0.453667	0.15351	0.307826	0.291119	0.369165	1.30715	0.54073	0.00578164	0.414883	0.362649	0.122634	0.445968	0.390383	0.311241	0.291833	0.130901	0.18272	0.281829	0.0630889	0.122538	0.41887	0.496138	0.53797	0.358268
673	gltI	-0.241441	0.615929	0.719957	0.564827	0.963629	0.797513	0.798081	0.799227	0.78049	0.799807	0.774122	0.807402	0.570312	0.798081	0.781998	1.02587	0.872576	0.796949	0.797796	0.799227	0.801272	0.792825	0.835705	0.840083	0.958904	0.804897	1.0026	0.465509	0.329042	0.798366	0.805828	0.840116	0.536782	0.801866	0.613172	0.815944	0.838935	1.48653	0.960231	0.848622	0.840129	0.797796	0.929615	0.780782	1.03288
674	insH1	0.0161672	0.655387	0.594419	0.39831	0.151994	0.504296	0.494646	0.47515	0.460353	0.465302	0.384002	0.336173	0.471716	0.494646	0.308901	0	0	0.513882	0.499479	0.47515	0.440384	0.319872	0.188367	0.376344	0.0698934	0.378765	0.170295	0	-0.0125571	0.489797	0.36294	0.37351	0.703384	0.430296	0.604761	0.357627	0.133459	0.420136	0.404761	0.399599	0.333469	0.499479	0.425225	0.455387	0.229674
675	lnt	0	0	0	0	0	0	0	0	0	0	0	0	0	0	0	0	0	0	0	0	0	0	0	0	0	0	0	0	0	0	0	0	0	0	0	0	0	0	0	0	0	0	0	0	0
676	ybeX	-0.223695	0.204422	0.354785	0.0762923	0	0.232711	0.268261	0.410604	0.207294	0.210157	0.51531	0.176599	0	0.533731	0.602202	-0.030342	0.155696	0.238256	0.229925	0.215853	0.195744	0.712789	0.446303	0.428142	0.368267	0.0996921	0.186053	0	0.67902	0.224325	0.192081	0.157063	0.555181	0.23104	0.175139	0.130322	0.0926567	0.164752	0.248404	0.172154	0.240226	0.271056	0.0636081	0.204422	0.133204
677	ybeY	0	0.430333	0.166168	0.269148	0.562432	0.456108	0.399608	0.197309	0.43295	0.435558	0.0774914	0.316094	0.508765	0.19277	0	0.165587	0	0.461159	0.453569	0.440748	0.422427	0.59147	0.242326	0	0.2649	0.590468	0.34693	0.231985	0.00891029	0.448466	0.3302	0.387184	0	0.365696	0.403653	0.598877	0.292629	0.560856	0.437072	0.400933	0.23318	0.402155	0.568647	0.430333	0.362214
678	ybeZ	0.0976298	0	0.302874	0	0	0	0	0.281878	0	0	0.392159	0	0	0.182868	0	0	-0.234734	0	0	0	0	0	0	0	0.0998333	0	0	0	-0.303142	0	0	0	0.219264	0	0	0	0	0	0	0	0	0	0.0189151	0	0.0310453
679	miaB	-0.281497	0.250397	0.212535	0.139614	0.237389	0.287614	0.449936	0.364088	0.254176	0.257942	0.355914	0.32935	0.364414	0.275332	2.0821	0.225235	1.58097	0.294908	0.283948	0.265435	0.238981	0.152649	0.0617654	1.48922	0	0.130397	0.0128982	0.00700608	0	0.27658	0.349718	0.188095	0.141297	0.40097	0.211874	0.108297	0	0.331543	0.201592	0.207947	0.596207	0.453614	0.171267	0.250397	0.433293
680	ubiF	0	0.747586	1.20555	1.0459	0.450698	0.777887	0.687076	0.710503	0.750663	0.753729	0.623443	0.588896	0.506906	0.774378	4.46147	0	3.65603	0.783826	0.774903	0.75983	0.738291	1.16094	0.574882	0	0.987291	0.730964	0.581244	0.456159	0.622024	0.768904	0.605479	0.69686	0.650132	0.647208	0.716221	0.720876	0.550856	0.671762	0.721362	0.713023	0.452763	0.69007	0.756989	0.747586	0.930425
681	glnX	0.589602	0.786306	0.267376	0.230915	1.01643	0.804915	0.886076	0.843152	0.788196	0.790079	0.839065	0.825783	1.34331	0.798774	0	0.754862	0	0.808562	0.803082	0.793826	0.780599	0.237432	0.691991	1.25485	0.161108	0.726306	0.667557	0.164611	0.292625	0.799398	0.835967	0.755155	0.731757	0.861593	0.767045	0.715256	0.661108	0.826879	1.2619	0.765081	0.959211	0.887915	0.746741	0.786306	0.377754
682	glnV	0	0	0	0	0	0	0	0	0	0	0	0	0	0	0	0	0	0	0	0	0	0	0	0	0	0	0	0	0	0	0	0	0	0	0	0	0	0	0	0	0	0	0	0	0
683	metU	0.253729	0	0	0	0.526748	0	0	0	0	0	0	0	0	0	0	0	0	0	0	0	0	0	0	0	0	0	0	0	-0.114459	0	0	0	0	0	0	0	0	0	0	0	0	0	0	0	0
684	glnW	0	0	0	0	0	0	0	0	0	0	0	0	0	0	0	0	0	0	0	0	0	0	0	0	0	0	0	0	0	0	0	0	0	0	0	0	0	0	0	0	0	0	0	0	0
685	glnU	0	0	0	0	0	0	0	0	0	0	0	0	0	0	0	0	0	0	0	0	0	0	0	0	0	0	0	0	0	0	0	0	0	0	0	0	0	0	0	0	0	0	0	0	0
686	leuW	0	0	0	0	0	0	0	0	0	0	0	0	0	0	0	0	0	0	0	0	0	0	0	0	0	0	0	0	0	0	0	0	0	0	0	0	0	0	0	0	0	0	0	0	0
687	metT	0	0	0	0	0	0	0	0	0	0	0	0	0	0	0	0	0	0	0	0	0	0	0	0	0	0	0	0	0	0	0	0	0	0	0	0	0	0	0	0	0	0	0	0	0
688	asnB	0.0490898	-0.159941	-0.220909	-0.417018	-0.463333	-0.111031	-0.120681	-0.140178	-0.154975	-0.150025	-0.231326	-0.279154	-0.343612	-0.120681	-0.306427	-0.938971	-1.16993	-0.101445	-0.115848	-0.140178	-0.174943	-0.295456	-0.426961	-0.438983	-0.545434	0.763438	-0.445032	-1.07306	-1.57167	-0.125531	-0.252387	-0.241818	-0.311944	-0.185032	-0.210567	-0.257701	-0.481869	-0.195192	-0.210567	-0.215729	-0.281858	-0.115848	-0.190103	-0.159941	-0.385654
689	umpH	0.409498	0.894586	0.508198	0.791307	0.260485	0.643866	0.636149	0.577311	0.596957	0.612683	0.563601	0.592879	0.926372	0.636149	0.761116	0.30828	0.0384	0.651532	0.640014	0.620558	0.592756	0.654956	0.3548	0.274624	0.411802	0.778684	1.85265	0.0621412	0.112178	0.632271	0.618837	0.534724	0.839213	0.580136	0.799473	0.666071	0.325678	0.477574	0.521021	1.3676	0.507256	0.640014	0.668645	0.604753	0.365071
690	nagC	0.288699	0.21514	0.416261	0	0.763697	0.347486	0.342331	0.447244	0.355394	0.326657	0.240743	0.368458	0.168909	0.342331	0.375418	0.229531	0	0.352606	0.344913	0.331918	0.313348	0.159447	0.275851	0.457593	0.141249	0.319888	0	-0.171652	0.505926	0.339741	0.370616	0.289767	0.485782	0.320099	0.333773	0.425475	0.540422	0.566504	0.409646	0	0.25624	0.344913	0.403885	0.321361	0.358613
691	nagA	0.172211	0.763443	0.794667	0.865548	0.89176	0.805777	0.79937	0.889993	0.668734	0.779889	0.87197	0.625878	0.666002	0.79937	0.736591	0.2617	0.505609	0.812141	0.802579	0.786427	0.763347	0.803598	0.762197	0.607402	0.741208	0.711817	0.629561	0.179997	0.948939	0.796151	0.685378	0.67722	0.740883	0.714919	0.729075	0.666316	0.527965	0.342502	0.843263	0.814768	0.692368	0.802579	0.726727	0.773307	0.580971
692	nagB	-0.0934947	1.06526	0.995371	0.636153	0.582349	0.959217	0.951398	0.906009	1.32371	0.92762	0.820011	0.985351	0.766572	0.951398	0.926446	0.941723	0.2718	0.966985	0.955314	0.935599	0.907428	0.918272	0.941454	0.830801	0.68612	0.860532	0.675564	0.461694	0	0.947468	0.852261	1.00802	0.776846	1.05403	0.881597	0.852394	0.894178	2.75666	0.848971	0.851951	0.820793	0.955314	0.902731	0.919585	0.748825
693	nagE	0.190699	-0.355366	0.583666	0.387557	-0.658758	-0.306457	-0.316107	-0.335603	-0.3504	-0.345451	-0.426751	-0.474579	-0.539037	-0.316107	-0.501852	-1.1344	0.63465	-0.296871	-0.311274	-0.335603	-0.370368	-0.490881	-0.622386	-0.634409	0.25914	-0.431988	-0.640458	-0.268489	0.554837	-0.320956	-0.447813	-0.437243	-0.507369	0.619543	-0.405992	0.546874	-0.677294	-0.390617	-0.405992	-0.411154	-0.477284	-0.311274	-0.385528	-0.355366	-0.581079
694	glnS	-0.621522	0.595046	0.534078	0.782414	0.402765	0.643956	0.634305	0.614809	0.600012	0.604962	0.523661	0.65194	0.411375	0.634305	0.624667	0.250115	0.159498	0.653542	0.639139	0.790916	0.580044	0.89363	0.439137	0.949386	0.320664	0.694532	0.897222	0.273249	0.349083	0.629456	0.835933	0.62428	0.665265	0.569955	0.655531	0.497286	0.606451	0.559795	0.655531	0.539258	0.58424	0.639139	0.675995	0.595046	0.878774
695	chiP	-0.145059	1.10607	1.0451	0.848991	1.30268	1.15498	1.14533	1.12583	1.11103	1.11598	1.03468	0.986855	0.922397	1.14533	1.45958	0.327038	1.09608	1.16456	1.15016	1.12583	1.09107	0.970553	4.33905	4.75602	0.720575	1.02945	0.820977	0.692946	0.194343	1.14048	1.01362	1.02419	0.954065	1.08098	1.05544	1.00831	0.78414	1.07082	1.05544	1.05028	0.984151	1.15016	1.07591	1.10607	0.880355
696	chiQ	-0.698016	1.36872	1.30775	0.911644	1.38232	1.21763	1.20798	1.18848	1.17369	1.17864	1.29734	1.24951	0.98505	1.20798	1.02224	1.34067	0.758737	1.22722	1.21281	1.18848	1.15372	1.03321	1.3017	1.08968	1.75996	1.2921	0.88363	0.455599	0.156997	1.20313	1.07628	1.08684	1.01672	1.14363	1.1181	1.07096	1.04679	1.33347	1.1181	1.11293	1.0468	1.21281	1.13856	1.16872	0.943009
697	fur	0	0	0	0	0	0	0	0	0	0	0	0	0	0	0	0	0	0	0	0	0	0	0	0	0	0	0	0	0	0	0	0	0	0	0	0	0	0	0	0	0	0	0	0	0
698	uof	0	0	0	0	0	0	0	0	0	0	0	0	0	0	0	0	0	0	0	0	0	0	0	0	0	0	0	0	0	0	0	0	0	0	0	0	0	0	0	0	0	0	0	0	0
699	fldA	0	-0.416281	-0.477249	-0.673358	-0.719673	-0.367371	-0.377021	-0.396517	-0.411314	-0.406365	0	-0.535494	-0.599952	-0.377021	-0.562767	0	-1.42626	-0.357785	-0.372188	-0.396517	-0.431283	-0.551796	-0.6833	-0.695323	0.023228	-0.492902	-0.701372	-0.329403	-1.82801	-0.381871	-0.508727	-0.498158	-0.568284	-0.441372	-0.466907	-0.514041	-0.738209	-0.451532	-0.466907	-0.472068	-0.538198	-0.372188	-0.446443	-0.416281	-0.641993
700	ybfE	0	0	0	0	0	0	0	0	0	0	0	0	0	0	0	0	0	0	0	0	0	0	0	0	0	0	0	0	0	0	0	0	0	0	0	0	0	0	0	0	0	0	0	0	0
701	ybfF	0	0	0	0	0	0	0	0	0	0	0	0	0	0	0	0	0	0	0	0	0	0	0	0	0	0	0	0	0	0	0	0	0	0	0	0	0	0	0	0	0	0	0	0	0
702	seqA	0.0313878	1.82236	0.621804	0.56528	0.518965	0.871267	0.861617	1.84212	0.827323	0.832273	0.750972	0.703144	0.471526	0.861617	0.634653	0.0433274	-0.016423	0.880853	0.86645	0.84212	0.807355	0.686842	0	0.543315	0.436864	0.745736	0.537266	-0.0907655	-0.589368	0.856767	0.729911	0.65861	1.62605	0.797266	0.771731	0.724597	0.500429	0.787106	0.771731	0.766569	0.70044	0.86645	0.792195	0.822357	0.596644
703	pgm	0	0	0.139586	0	0	0	0	0	0	0	0	0	0.16716	0	0.0412176	-0.377519	-0.171204	0	0	0	0	0	1.78878	-0.0775318	-0.183983	0	0	0	0.263846	0	0	0.0818696	0.0443021	0	0	0	-0.120418	0	0	0	0	0	0	0	0
704	ybfP	0.32044	0.291231	0.191491	0.473151	0.275967	0.273474	0.263824	0.244327	0.281094	0.40681	0.353179	0.305351	0.390936	0.263824	0.21719	0	0.303903	0.28306	0.268657	0.310577	0.27585	0.328047	0	0.0788552	0	0.347943	0.623765	0.137596	0.0607759	0.258974	0.265451	0.265104	0.199987	0.26614	0.240605	0.192969	0.274967	0.25598	0.240605	0.168776	0.102647	0.440988	0.300066	0.291231	0.210024
705	ybfG	0.0415266	0	0	0	0	0	0	0	0	0	0	0	0	0	0	0	0	0	0	0	0	0	0	0	0	0	0	0	0	0	0	0	0	0	0	0	0	0	0	0	0	0	0	0	0
706	ybfI	0	-0.55055	-0.521596	-0.40157	-0.333054	-0.744489	-0.710661	-0.599722	-0.657997	-0.558704	-0.535002	-0.600876	-0.544873	-0.641749	-0.523147	-0.182356	-0.110632	-0.665991	-0.749306	-0.686679	-0.522098	-0.704134	-0.249269	-0.496495	-0.960037	-0.565672	0.181243	-0.501417	-0.438916	-0.628554	-0.64302	-0.699397	-0.546709	-0.775011	-0.529839	-0.538932	-0.348687	-0.698214	-0.643464	-0.780275	-0.871837	-0.636916	-0.711171	-0.594052	-0.352161
707	potE	0	0	0.0756025	0	0	0	0	0	0.0566359	0	0	0	0	0	0.20772	0.0611544	0	0	0	0.00156208	0.00141828	0	0.0233499	0	0	0	0	0	0	0	0	0	0	0	0	0.00188069	0	0	0	0	0	0	0	0	0.104345
708	speF	-0.550658	-0.000539533	-0.0687461	0	-0.108306	0	0	0	0	0.0159006	0	0	-0.18563	0	0	-0.621618	-0.224262	0.19687	0	0	0	0	0.360107	0	-0.0336612	0	0	-0.133464	0.55168	0	0.40319	-0.0452049	0	0	-0.0563435	-0.101204	-0.122934	0	-0.0279373	0	0.681911	0	0	0	0
709	ybfK	0	0.343475	1.09101	1.09604	0.210444	0.251335	0.241945	0.304057	0.262633	0.211675	0.288817	0.362619	0	0.241945	0.642565	0	0.420754	0.239378	0.246648	0.962101	0.297258	0.998288	0.238523	0	0.103535	0.947399	1.25615	0.620465	0.479998	0.237227	0.232373	0.178137	0.62155	0.179334	0.208543	0.108629	0.246464	0.223503	0.181516	0.149467	0.615988	0.246648	0.228454	0.365909	0.56548
710	kdpE	0.182529	0	0	0	0	0	0	0	0	0	0.0537959	0	0.918314	0	0	0.329098	0.195638	0	0	0.536183	0	0	0	0.44255	0	0	0	0	0	0	0	0	0.749775	0	0	0	0	0	0	0	0	0	0	0	0
711	kdpD	-2.04542	2.02926	1.59452	1.3959	1.79238	2.12424	2.11928	2.56873	2.07465	2.10507	1.9583	2.40047	1.55817	2.11928	1.73323	1.25742	0.882815	2.1398	2.12176	1.47162	2.03736	1.56634	1.81471	1.70068	2.26373	1.65067	1.28783	1.47764	2.21024	2.11679	1.99236	2.03005	1.36333	2.08624	2.0461	3.04892	1.75584	2.05399	2.55961	2.07047	2.56357	2.12176	2.05661	2.01804	1.69254
712	kdpC	-0.475047	0.972634	1.1545	0.717946	0.801429	1.01778	1.00887	1.09344	0.977219	1.08435	0.906741	0.862591	0.905656	1.00887	0.903697	0.484299	0.626061	1.02663	1.01334	1.01652	0.958786	0.847544	0.982565	1.03146	0.888204	0.927548	1.147	1.0463	0.3743	1.0044	0.91294	0.922697	1.26822	1.18762	1.02847	0.948675	0.55355	0.940095	1.17167	1.0237	0.911377	1.01334	1.04736	0.972634	0.744928
713	kdpB	0	0.351347	0.153978	1.11577	0.822599	0.366396	0.363427	0.280505	0.352875	0.277475	0.329383	0.314666	0.21791	0.363427	0.902804	0.188569	0	0.369346	0.364914	0.588197	0.346731	0.30965	0.576879	0.528183	0.675417	0.558541	0	0.675457	1.09021	0.361935	0.553671	0.556923	0.227654	0.165017	0.258847	0.917797	0.739973	0.340501	0.547684	0.257259	0.775373	0.364914	0.265143	0.351347	0.692655
714	kdpA	0.0575167	0.0619041	0.000936123	0	0.303722	0.110814	0.101164	0.0816674	0.289093	0.182931	0.277738	0.229909	0.5449	0.212275	0	-0.0315783	0.534702	0.1204	0.217108	0.0816674	0.046902	0.0375003	0.193214	0	0	0.096394	0	0.056551	0.174698	0.0963142	0.302791	0.267245	0	0.259035	0.187385	0.0752552	0	1.20159	0.0112781	0.117227	0.449427	0.105997	0	0.173015	0.381401
715	kdpF	0.08672	-0.121175	-0.146201	-0.190688	0	-0.0536723	-0.0881145	-0.0519008	-0.0643614	0	0	0	0	0	-0.156641	0.010295	0	-0.0719156	0	-0.0782166	-0.246292	-0.208977	-0.0257727	-0.0423472	-0.393169	-0.133067	-0.331741	-0.0152062	0	-0.171146	0	0	-0.270081	0	0	-0.0719204	-0.313325	0	-0.163808	-0.115523	0	-0.0840445	-0.0768113	-0.0685435	0
716	ybfA	0	-0.256934	-0.174132	-0.263755	0	-0.133651	-0.24247	-0.039126	-0.0445775	-0.212899	0	-0.268908	-0.531486	-0.183555	-0.25182	0.106036	0.138047	-0.235383	-0.303722	-0.144389	0	-0.201597	-0.0742645	-0.396976	-0.188431	-0.0746361	0	-0.386171	-0.613299	-0.0600456	-0.315261	-0.429692	0	-0.372906	-0.398441	-0.266635	-0.0597491	0.851124	-0.275585	-0.0669606	-0.469732	-0.240689	0.143264	-0.0464072	0
717	rhsC	0	0	0	0	0	0	0	0	0	0	0	0	0	0	0	0	0	0	0	0	0	0	0	0	0	0	0	0	0	0	0	0	0	0	0	0	0	0	0	0	0	0	0	0	0
718	ybfB	-0.593009	-1.2484	-1.49398	-1.42168	-1.27267	-1.73609	-1.7451	-1.76329	-1.64377	-1.29449	-0.86272	-0.905417	-0.420916	-1.7451	-1.16247	-0.355871	-0.61035	-1.72714	-1.74058	-1.44951	-1.23975	-1.77488	-0.949819	-1.56418	-1.45221	-1.45325	-1.64782	-0.728797	-1.21245	-1.40496	-1.60135	-1.17615	-1.31228	-1.69249	-1.82899	-1.26165	-0.843084	-1.54797	-1.38606	-1.03381	-1.62886	-1.52926	-1.19856	-1.6674	-1.24687
719	rhsO	0	-0.351945	-0.290125	-0.022386	0	-0.0591931	-0.0643399	-0.0747379	-0.149296	-0.318988	-0.616171	-0.142651	-0.94936	-0.0643399	-0.0413992	-0.577241	0.80635	-0.0540806	-0.0617622	0	-0.371274	-0.22422	-0.768257	-0.473098	-0.635536	-0.326143	-0.437327	0	-0.281646	-0.239257	-0.267916	0	-0.472011	0	-0.112279	-0.443081	0	-0.237412	-0.333741	-0.515032	-0.283634	-0.167426	-0.407029	0	0
720	ybfC	0.180887	0.412322	0.726624	0.119841	0.412322	0.836501	0.826851	0.807355	0.792558	0.797507	0.716207	1.66838	0.412322	0.412322	0.641106	0.00856201	2.94753	0.846087	0.831684	0.807355	0.77259	1.65208	0.412322	0.508549	0.402098	0.71097	1.5025	-0.125531	0	0.822002	0.695145	0.705715	0.412322	0.762501	0.412322	0.689832	0.465664	0.752341	0.736966	0.731804	4.25064	0.831684	0.75743	0.787592	0.412322
721	ybfQ	0.579041	0.375269	0	0.410674	0.0718771	0	0	0	0	0	0	0	0.191598	0.414529	0	0	0	0	0	0	0	0	0.108249	0	0	0	0	0	0	0	0	0	0.223266	0	0.324643	0	0	0	0	0	0	0	0	0	0.149556
722	ybfL	0.0972909	-0.0870125	-0.397981	0	-0.390405	-0.288103	-0.297753	-0.317249	-0.332046	-0.327097	-0.408397	-0.168507	-0.0206835	-0.0477531	-0.483499	-0.323561	0	-0.278517	-0.29292	-0.317249	-0.0642964	-0.184809	-0.354032	-0.616055	-0.142306	-0.413634	0	0	-0.852497	-0.302602	-0.429459	-0.41889	-0.239016	-0.362103	0	-0.434773	-0.0787411	-0.372263	0	-0.3928	0	-0.29292	0	0	-0.0627253
723	ybfD	0	0	0	0	0	0	0	0	0	0	0	-0.0754366	0	0	0	0	-0.134715	0	0	0	-0.0754366	-0.0754366	0	0	-0.367918	0	-0.409822	0.462147	0	0	0	0	0	0	0	0	-0.367918	0	-0.175357	0	-0.246648	0	-0.154893	-0.124731	0
724	ybgA	0.225445	-1.12124	-0.93221	-1.37832	-1.17463	-1.07233	-1.08198	-1.10148	-1.11628	-1.11133	-0.692627	-1.24046	-0.658673	-1.08198	-1.01773	-1.1322	-0.338315	-1.06275	-1.07715	-1.10148	-0.636244	-1.00676	0.641473	-1.40028	0.629903	1.37751	-1.40633	0	-0.208165	-1.08683	2.73792	-1.20312	-1.02325	-1.14633	-1.17187	-0.969002	-0.79693	-1.15649	-0.775628	-1.17703	-0.662678	-1.07715	-1.1514	-0.621242	-0.759687
725	phr	0	0	0	0	0	0	0	0	0	0	0	0	0	0	0	-0.487333	-0.416758	0	0	0	0	0.0279439	-0.258372	0	0.64574	-0.0679738	0	-0.0739931	0.0238994	0	-0.0837988	0	0	0	0	0	0	0	0.0831919	0	0	0	0	0	-0.0271435
726	dtpD	-0.197964	1.09317	0.959425	1.33593	0.871372	1.13141	1.17061	1.09149	1.09706	1.08665	0.979033	1.10122	0.949496	1.12387	1.27375	0.499416	0.604812	1.13891	1.19153	1.22237	1.08144	0.965717	0.883717	0.902178	0.771606	1.09788	1.00791	0.369152	0.877056	1.12008	1.28704	1.04228	1.1773	1.24838	1.21873	0.999599	0.767215	1.0714	1.08428	1.05265	1.10105	1.12765	1.2088	1.09317	0.816977
727	ybgI	-0.209185	0.750605	0.881609	0.650911	0.803742	0.769809	0.681881	0.789215	0.752555	0.780195	0.827565	0.521543	0.678616	0.76602	0.561894	0.617113	0.328675	0.773573	0.652928	0.553628	0.744714	0.73051	0.64699	0.792121	0.823382	0.604216	0.590917	0.610223	0.110724	0.764116	0.552234	0.69484	0.325571	0.626075	0.433484	0.74307	0.757858	0.726339	0.658846	0.723137	0.516974	0.767917	0.805172	0.750605	0.841475
728	ybgJ	-0.0487209	0.035852	0	0.339782	0	0.058333	0.312545	0.116765	0.0381347	0.128081	0.111122	0.277156	0	0.0538974	0.168115	0	0.0412887	0.0627392	0.242937	0.340978	0.0289563	0.0436073	0	0	0	0.191492	0	0	0	0.0516684	0.19807	0	0.658271	0.191661	0.4955	0.0627463	0	0	0.0822865	0.26315	0.717521	0.0561189	0	0.035852	0.213656
729	ybgK	0	0.45733	0.378572	0.147803	0.259508	0.48699	0.35119	0.416962	0.460341	0.357092	0.417695	0.262053	0.516767	0.481138	0.288099	0.298355	0.38154	0.492803	0.406474	0.45311	0.448232	0.32319	0.321299	0.558419	1.12394	0.319526	0.341656	0.266329	0.285942	0.478197	0.527064	0.513693	0.317881	0.576112	0.226051	0.345693	0.254737	0.55087	0.532435	0.273404	0	0.484068	0.432309	0.45733	0.197674
730	ybgL	0.0478595	0	0	0	0	0	0	0	0	0.0765644	0	0	0	0	0	0	0.0101923	0	0	0	0	0	0.036012	0.145702	0.141706	0.0195253	0	0	0.171764	0	0	0	0	0	0	0	0	0	0.0540538	0	0	0	0	0	0
731	nei	-0.292298	0.838635	0.797905	0.518591	0.946869	0.873305	0.866465	0.852645	0.842156	0.812712	0.900796	1.06808	0.84135	0.866465	0.925842	0.238982	0.498197	0.880101	0.869891	0.941252	0.783697	0.661046	0.784818	0.612306	0.953438	0.935945	0.509963	0.782374	1.15998	0.863027	1.20981	0.736292	0.761862	0.909457	0.758445	0.999561	0.711099	0.718711	0.717621	0.704153	0.714238	0.869891	0.817255	0.844964	0.526138
732	abrB	-0.10556	0.0593392	0	0.188255	0.190235	0.0819986	0.0775278	0.0684954	0.0616401	0.060444	0	0.14579	0.123613	0.0775278	0.161944	0	0	0.0864398	0.0797669	0.101407	0.135933	0	0	0.284265	0.00888352	0.0667509	0.137386	0	0.129134	0.0752811	0.021573	0.104951	0.281948	0.0806262	0.119429	0	0.148937	0.250603	0.395363	0.241088	0.045894	0.0797669	0.0453655	0.0188329	0.213765
733	ybgO	0	0.567502	0.622724	0.618547	0.661217	0.60502	0.597617	0.582662	0.571311	0.579372	0.602953	0.668721	0.632939	0.597617	0.375777	0.19047	0.382031	0.612373	0.601325	0.653548	0.620551	1.18352	0.326953	0.195534	0.606734	0.479339	0.647546	0	0.665375	0.593897	0.545955	0.569252	0	0.619141	0.593224	0.47669	0.459584	0.564512	0.640683	0.548758	0.643601	0.601325	0.544365	0.672565	0.730858
734	ybgP	0.0510278	0	0	0	-0.100246	0	0	0	0	0	0	0	0	0	-0.0565513	-0.0896436	-0.521123	0	0	0	0	0.198738	-0.105656	0.558135	-0.129706	-0.058115	0	-0.281405	0	0	0	0	1.04134	-0.00658473	0	-0.00782522	-0.0243582	0	0	-0.0372815	0	0	-0.0116557	0	0
735	ybgQ	-0.414239	-0.623395	-0.684363	-0.380472	-0.926787	-0.574485	-0.584135	-0.603631	-0.618428	-0.613479	-0.694779	-0.742608	0.192934	-0.584135	-0.269881	-0.109943	-0.133379	-0.564899	-0.579302	0.18885	-0.638397	-0.75891	-0.390414	-0.902437	-0.508888	-0.700016	-0.908486	-0.244036	-0.535119	-0.588985	-0.715841	-0.705272	0.0170834	-0.148486	-0.674021	0.0713265	-0.945323	-0.658646	-0.674021	-0.679183	-0.745312	-0.579302	-0.653557	-0.623395	-0.849108
736	ybgD	0.211335	-0.591874	-0.656182	-0.67673	-0.673225	-0.74477	-0.722655	-0.557379	-0.782056	-0.750128	-0.544947	-0.478329	-0.247328	0.43877	-0.452174	-0.505169	-0.350963	-0.706334	-0.718555	-0.449883	-0.374756	0.73094	0.432047	0	-0.582755	-0.290675	-0.855545	-1.00047	-0.582084	-0.651012	-0.526822	-0.873467	-0.521006	-0.671195	-0.615668	-0.581339	-0.536171	-0.679816	-0.586801	-0.697241	-0.889715	-0.612494	-0.261131	-0.587864	-0.843994
737	gltA	-0.363845	-0.859459	-0.842762	-0.0596032	-0.177184	-0.850431	-1.00926	-0.933117	-0.883721	-0.518614	-0.658537	-0.523251	-0.123103	-1.07287	-1.12943	-1.23469	-0.86801	-0.994684	-1.0056	-0.678116	-1.02006	-1.24765	-1.29559	-1.53403	-1.24756	-1.24856	-0.562884	-0.100958	-0.328793	-0.891718	-0.269507	-0.860881	-0.888853	-1.08831	-0.701139	-0.900938	-0.29417	-1.09601	-1.13796	-1.11157	-0.979845	-1.0359	-1.21054	-1.08703	-0.727423
738	sdhC	0	1.91327	1.8523	1.65619	1.60987	1.96217	1.95252	1.93303	1.91823	1.92318	2.01799	1.97016	1.84071	1.95252	1.87789	1.30701	1.52383	1.97176	1.95736	2.10914	1.89826	1.77775	1.64625	1.74533	1.52777	1.83664	1.62817	1.28219	0.834874	1.94768	2.04304	1.83139	1.87237	1.88817	1.86264	1.81551	1.70245	1.98913	1.86264	1.85748	1.79135	1.95736	1.8831	2.02438	1.79866
739	sdhD	-0.242725	0	0	0	0	0	0	0	0	0	0	0	0	0	0	0	0	0	0	0	0	0	0	0	0	0	0	0	0	0	0	0	0	0	0	0	0	0	0	0	0	0	0	0	0
740	sdhA	-0.294239	0	0	0	0	0	0	0	0	0	0	0	0	0	0	0.0150146	0	0	0	0	0	0	0	0	0	0	0	0.230801	0	0	0	0	0	0	0	0	0	0	0	0	0	0	0	0	0
741	sdhB	0.1712	-0.0935849	0.021554	-0.239551	-0.0636437	-0.0446753	-0.0543255	-0.0738217	-0.0886187	0.0924375	-0.0538584	0.00942415	0.0560774	-0.0543255	-0.240071	-0.0109604	-0.483018	-0.0350893	-0.0494923	-0.0738217	0.0675199	0.677552	0.994642	-0.150405	-0.479078	0.117012	-0.378676	-0.673374	-1.17198	0.0519362	-0.186031	-0.0643508	-0.134477	0.279653	0.167717	0.177758	0.0289314	-0.128836	-0.144211	-0.149373	-0.215502	-0.0494923	-0.123747	-0.0935849	-0.208187
742	sucA	0	0	0	0	0	0	0	0	0	0	0	0	0	0	0	0	0	0	0	0	0	0	0	0	0	0	0	0	0	0	0	0	0	0	0	0	0	0	0	0	0	0	0	0	0
743	sucB	-0.0233851	0.548645	0.554768	0.522998	0.554942	0.589442	0.581393	0.644352	0.552788	0.643718	0.601277	0.433154	0.629091	0.581393	0.424228	0.185813	0.235393	0.597438	0.583641	0.56513	0.60376	0.565151	1.05689	0.383963	0.323787	0.461214	0.668207	0.0714633	0.314904	0.582698	0.580035	0.421491	0.619124	0.527716	0.506417	0.465318	0.412697	0.515708	0.568248	0.750334	0.47025	0.58587	0.523487	0.549091	0.346104
744	sucC	0.132013	0.988853	1.22645	0.65266	0.980202	1.02401	1.01707	0.9931	0.992422	0.953174	0.979768	0.972724	0.844347	1.01707	0.893221	0.518664	0.692992	1.0309	1.02827	1.00306	1.01835	0.858418	0.806503	0.826628	1.15442	1.0357	0.651334	0.628098	0.488853	0.990399	1.1189	1.18505	1.02476	0.970818	0.952463	0.926313	0.849607	0.978827	1.01786	0.873123	1.13359	1.01861	0.967173	0.98692	0.888444
745	sucD	-0.0985807	0.218479	0.0611139	2.06368	0.293217	0.246685	0.24112	0.175774	0.221343	0.372235	0.734579	0.221667	0.343235	0.24112	0.0745481	0.255262	0	0.252213	0.196344	0.229876	0.346569	0.160699	0.198241	0.206189	0.456739	0.547104	0.379912	0.428821	-0.0105045	0.38101	0.225213	0.101701	0.391314	0.204009	0.189283	0.114539	0.234965	0.103919	0.171447	0.305566	0.102807	0.255797	0.201085	0.230369	0.207812
746	mngR	0.0280297	0.79146	0.889555	0	0.694992	0.820465	0.814742	0.929889	0.794405	0.735657	0.370401	0.77412	0.669752	0.814742	0.833526	0.337215	0.311672	0.82615	0.92076	0.80318	0.704754	0.681772	0.577376	0.522378	0.281951	0.936716	0.45554	0.632763	-0.082801	0.752413	0.753282	0.771886	0.292617	0.77658	0.761436	0.836635	0.59965	0.974917	0.768868	0.924097	0.705039	0.791821	0.773572	0.765672	0.60781
747	mngA	0.0876784	0.787238	0.806651	0.788453	0.603139	0.830346	0.821841	0.779315	0.791615	0.808314	1.50341	0.771492	0.727908	0.821841	0.632338	0.589746	0.073211	0.838795	0.90547	0.804657	0.889577	0.77366	0.563035	0.762012	1.43079	0.681565	1.21852	0.264351	-0.149635	0.829457	1.00243	0.709275	2.17576	0.765123	0.742616	0.780443	0.603671	0.715295	0.74113	0.963419	0.841101	0.931258	0.760653	0.892395	0.598255
748	mngB	-0.329878	-0.123872	-0.18484	0.619051	0.572736	-0.0749621	-0.0846122	-0.104108	-0.118905	-0.113956	-0.195256	-0.243085	-0.307543	-0.0846122	-0.270358	-0.902901	-1.13386	-0.065376	-0.0797791	-0.104108	-0.138874	-0.259387	-0.390891	-0.402914	-0.509365	-0.200493	-0.408963	-1.03699	0.0493661	-0.0894616	-0.216318	-0.205749	-0.275875	-0.148963	-0.174498	1.36333	-0.4458	-0.159123	-0.174498	-0.179659	-0.245789	-0.0797791	-0.154034	-0.123872	-0.349584
749	cydA	-0.00169686	-0.194044	-0.255012	0.924735	0.0334219	-0.145134	-0.154785	-0.174281	-0.189078	-0.184129	0.143472	0	0.0642114	0.0151167	0.17812	-0.63974	-0.00904065	-0.135548	-0.149951	-0.174281	0	2.61156	-0.461064	-0.473086	-0.246204	0	0.73839	0.089766	0	0	-0.28649	0	-0.0127138	-0.219135	-0.24467	-0.291804	-0.182639	-0.229295	-0.24467	-0.249832	-0.315961	-0.149951	0.319055	-0.194044	-0.0864235
750	cydB	0.200891	0.453556	0.120909	0.0423566	0	0.454242	0.454242	0.454242	1.49238	0.454242	0.358259	0.50101	0.259183	0.451722	0.0912219	0.492341	0.110239	0.454242	0.454242	0.454242	0.702714	0	0.186536	0.120909	0.0680628	0.120909	0.932388	0.492936	0.607218	0.620909	0.36111	0	0.46822	0.428465	0.40293	0.355796	0.395788	0.418305	0.40293	0.397768	0	0.454242	0.370218	0.717716	0.227843
751	cydX	0.237472	0	0.438346	0	0.407426	0.0482237	0.0385736	0.0190774	0.0042804	0.00922961	0	0	0	0.0385736	0.352828	0	0	0.0578098	0.0434067	0.0190774	0	0	0	0.220272	0	0.422693	0	0.0861916	0	0.0337242	0	0.383119	0	0	0	0	0	0	0	0	0.48324	0.0434067	0	0	0
752	ybgE	0	0	0	-0.105708	0	0	0	0	0	0	0	0	-0.0323022	0	0	0	-0.358615	0	0	0	0	0	-0.115651	0	-0.109124	0	0	0	0	0	0	0	0	0	0	0	0	0	0	0	0	0	0	0	-0.0743439
753	ybgC	-0.285723	0	0	0	0	0	0	0	0	0	0	0	0	0	0	0	0	0	0	0	0	0	0	0	0	0	0	0	0	0	0	0	0	0	0	0	0	0	0	0	0.100318	0	0	0	0
754	tolQ	-0.379573	0	0	0	0	0	0	0	0	0	0	0	0	0	0	0	0	0	0	0	0	0	0	0	0	0	0	0	0	0	0	0	0	0	0	0	0	0	0	0	0	0	0	0	0
755	tolR	0	0.7476	0.70018	0.454696	0.548665	0.78564	0.778135	0.762971	0.751462	0.755312	0.692078	0.654878	0.604744	0.778135	0.633666	0.512058	0.354092	0.793096	0.781894	0.762971	0.735931	0.642199	0.539918	0.0145827	0.744068	0.688005	0.525862	0.55942	0.291144	0.774363	0.453475	0.683917	0.888634	0.728084	0.708224	0.930823	0.945164	0.720182	0.708224	0.704209	0.61562	0.781894	0.72414	0.7476	0.38686
756	tolA	0	1.01345	0.993126	1.23385	1.02343	1.02975	1.02653	1.02004	1.0151	1.01675	0.989653	0.973711	0.952225	1.02653	0.96462	0.864883	0.852894	1.03295	1.02815	1.02004	1.00845	0.968277	0.924442	1.69441	0.773839	0.987908	0.918418	0.690194	0.467532	1.02492	1.31597	0.986156	0.740558	1.00508	0.996573	0.758639	0.665036	1.0017	0.996573	0.994852	0.961663	1.02815	1.00339	1.01345	1.38266
757	tolB	0	1.52036	1.45939	1.26328	1.21696	1.56926	1.55961	1.54012	1.52532	1.53027	1.44897	1.40114	1.33668	1.55961	1.37387	0.741326	1.36627	1.57885	1.56445	1.54012	1.50535	1.38484	1.25334	1.24131	1.13486	1.44373	1.23526	1.60723	0.108631	1.55477	1.42791	1.43848	1.36835	1.49526	1.46973	1.4226	1.19843	1.4851	1.46973	1.46457	1.39844	1.56445	1.49019	1.52036	1.29464
758	pal	-0.321359	-0.182175	-0.243143	-0.439252	-0.485567	-0.133265	-0.142915	-0.162412	-0.177209	-0.172259	-0.253559	-0.301388	-0.0325124	-0.142915	-0.328661	-0.961204	0.288203	-0.123679	-0.138082	-0.162412	-0.197177	-0.31769	-0.449195	-0.461217	-0.567668	-0.258796	-0.467266	0	-0.291603	-0.147765	-0.274621	-0.264052	-0.000844528	0	-0.232801	-0.279935	-0.504103	-0.217426	-0.232801	-0.237963	0	-0.138082	0	-0.182175	-0.407888
759	ybgF	0	0	0	0	0	0	0	0	0	0	0	0	0	0	0	0	0	0	0	0	0	0	0	0	0	0	0	0	0	0	0	0	0	0	0	0	0	0	0	0	0	0	0	0	0
760	lysT	0	0	0	0	0	0	0	0	0	0	0	0	0	0	0	0	0	0	0	0	0	0	0	0	0	0	0	0	0	0	0	0	0	0	0	0	0	0	0	0	0	0	0	0	0
761	valT	0	0	0	0	0	0	0	0	0	0	0	0	0	0	0	0	0	0	0	0	0	0	0	0	0	0	0	0	0	0	0	0	0	0	0	0	0	0	0	0	0	0	0	0	0
762	lysW	0	0	0	0	0	0	0	0	0	0	0	0	0	0	0	0	0	0	0	0	0	0	0	0	0	0	0	0	0	0	0	0	0	0	0	0	0	0	0	0	0	0	0	0	0
763	valZ	-0.143441	0	0	0	0	0	0	0	0	0	0	0	0	0	0.265661	0	0	0	0.524759	0	0	0	0	0	0	0	0	0.265649	0	0	0	0	0	0	0	0	0	0	0	0	0	0	0	1.49302	0
764	lysY	0	0	0	0	0	0	0	0	0	0	0	0	0	0	0	-0.168976	0	0	0	0	0	0	0	0	0	0	0	0	-0.801671	0	1.05281	0	0	0	0	0	0	0	0	0	0	0	0	0	0
765	lysZ	0	0	0	0	1.13069	0	0	0.815083	0.912639	0	0	0	0	0	0	0	1.63452	0	0	0	0	0.753727	0	0	0.51912	0	0	0	0	0.996296	0	0.782132	0	0	0	0	0	0	0	0	0.789819	0	0.858322	0	0.7083
766	lysQ	0	0.85217	0.813737	0.691627	0	0.883397	0.877235	0	0	0.8585	0.806594	0.832128	0.735061	0.877235	1.19791	0.217254	0	0.889517	1.12939	0.816621	0.736382	0	1.15723	0.706838	0	0.891507	0.610074	0.431282	0	0	1.04976	0	0.973059	0.759807	0.845563	0.70439	0.467111	0.829664	0.772346	0.843841	0	0.832154	0	1.11703	0
767	nadA	0.0643576	0	0	0	0	0	0	0	0	0	0	0	0	0	0	-0.195645	0	0	0	0	0	0	0	0	0	0	0	-0.329738	-0.57834	0	0	0	0	0	0	0	0	0	0	0	0	0	0	0	0
768	pnuC	0.347277	0.626191	0.58112	0.433123	0.462361	0.661557	0.654579	0.739891	0.515186	0.633361	0.574574	0.427848	0.493067	0.654579	0.376085	0.337963	0.0415313	0.668489	0.635183	0.736816	0.827762	0.552046	0.482027	0.35877	0.521305	0.394274	0.540201	0.376073	0	0.406758	0.578271	0.602514	0.0804065	0.760735	0.538153	0.726231	0.752453	0.600702	0.684587	0.531273	0.507058	0.754408	0.553564	0.603446	0.462505
769	zitB	0.243081	0.123405	0.116605	0	0.242065	0.118905	0.119793	0.101986	0	0.122493	0.129973	0.182959	0.136341	0.119793	0.0865848	0.0994831	0.0658156	0.118023	0.133196	0.0633089	0	0	0.222551	0	0.0351208	0	0.114421	0.173165	0.0606055	0	0.248549	0.118441	0	0.0333455	0.291817	0	0	0.126649	0.0530321	0.0905183	0	0.0610703	0.0406247	0	0.138175
770	ybgS	0.244864	0.359708	0.334305	0.370417	0.159279	0.393613	0.386923	0.322704	0.783532	0.366581	0.310222	0.491395	0.237769	0.386923	0.604093	0.250916	0.330688	0.400259	0.389835	0.375257	0.481547	0.53333	0.21939	0.665517	0.15003	1.05203	0.380679	0	-0.188321	1.11427	0.236127	0.39834	1.46799	0.345245	0.257859	0.533811	0.357288	0.335271	0.349225	0.497291	0.771274	0.392123	0.561424	0.5164	0.211388
771	aroG	0.01526	0.262012	0.206926	0	0.548915	0.282409	0.278385	0.367342	0.637848	0.266147	0.23224	0.0566559	0.175937	0.278385	0.00852869	0	-0.0389981	0.286407	0.279295	0.274906	0.186686	0.665441	0.420682	0.60684	0.736164	0.969036	0.127327	0	-0.0230977	0	0.345761	0.0798436	0	0.258921	0.370168	0.193983	0.0452044	0.24731	0.205511	0.138214	0	0.285053	0.18295	0.181475	0.153543
772	gpmA	-0.152252	0.118287	0.149789	0.264462	0.422485	0.15652	0.148976	0.219022	0.0151905	0.126038	0.0624865	0.150918	0	0.148976	0.0341112	-0.35118	-0.192414	0.164013	0.153071	0.132404	0.13693	0	0	-0.0330104	0	0	0.0561678	-0.300632	-0.780309	0.224286	0.011017	0.410411	0.168328	0.0965633	0.0169788	0.0355366	0.112152	0.090732	0.184248	0.103452	0.405325	0.151422	0.255081	0.141338	0.313444
773	galM	-0.00843697	0.309578	0.38362	0.27719	0.198444	0.337706	0.332156	0.20624	0.340169	0.31528	0.268523	0.282471	0.327019	0.332156	0.347097	0.163767	0.31747	0.343219	0.334854	0.321289	0.23752	0.234844	0.282465	0.402744	0.157821	0.28065	0.0777405	-0.0155249	0.0202462	0.30886	0.265486	0.318308	0.383838	0.295694	0.426097	0.32907	0.190409	0.289304	0.253101	0.270033	0.0383028	0.335281	0.509912	0.303601	0.157501
774	galK	-0.213379	0.818114	0.725414	0.574918	0.705208	0.854969	0.847697	1.45359	0.80997	0.825586	0.764324	0.853376	0.626968	0.847697	0.655548	0.387289	0.233319	0.862192	0.851374	0.832858	0.976851	0.714628	0.705571	0.642001	0.724083	0.75389	1.22809	0.264091	0.586434	0.852832	0.744565	1.01821	0.634285	0.798973	0.717552	0.854858	0.547258	0.791552	0.791693	0.779274	1.40816	0.851191	0.702095	0.820676	0.800434
775	galT	0.00849087	0.0651679	0.587677	0.125473	0.205602	0.100103	0.0932104	0.0792845	0.35443	0.0722504	0	0.694301	0	0.0932104	0.317678	0	0.124094	0.0355219	0.0966626	0.0792845	0	0.682657	0	0.43191	0.0755299	0.0104384	0.0528221	-0.440739	0.893378	0.0897465	0	0.00668433	0.522652	0.0472458	0.0290064	0.281054	0.192362	0.0399887	0.0290064	0.382462	0.544142	0.0966626	0.400767	0.0651679	0.733205
776	galE	0.022133	1.22165	1.05618	1.2695	0.890169	1.26357	1.2553	1.23859	1.36876	1.23015	1.3633	0.976608	1.05101	1.2553	1.02466	0.855652	0.599879	1.48607	1.25944	1.23859	1.41968	0.962635	0.967662	0.869258	1.03408	1.15597	1.40341	1.43855	0.961274	1.25114	1.14224	1.15147	0.978148	1.20014	1.17825	1.28071	0.874281	1.19143	1.17825	1.1024	1.00394	1.25944	1.12437	1.22165	0.862328
777	modF	0.739259	1.56592	1.50496	1.30885	1.26253	1.61483	1.60518	1.58569	1.57089	1.57584	1.89078	1.44671	1.38225	1.60518	1.80334	1.43314	0.805941	1.62442	1.61002	1.58569	1.94716	1.43041	1.19929	1.27923	1.16767	1.4893	1.28083	0.902802	1.44668	1.60033	1.71898	1.48405	1.41392	1.54083	1.5153	1.71816	1.64024	1.78067	1.5153	1.49913	1.44401	1.85804	1.53576	1.56592	1.59021
778	modE	0.0962218	0	0	0	0	0	0	0	0	0	0	0	0	0	0.024682	0	0	0	0	0	0	0	0.199223	0.0153034	0.0255212	0	0	0	0	0	0.00899577	0	0	0	0	0	0	0	0	0.0220141	0	0.00395489	0	0	0
779	acrZ	-0.127819	0	0	0.484139	0.350841	0.594564	0.585387	0.56759	0.592102	0.450088	0.494456	0.517631	0.492512	0.586307	0.497074	0.390032	0.155589	0.60263	0.590442	0.693441	0.539618	0.47983	0.131716	0.438227	0.621408	0.51258	0.478201	0.00807818	0	0.580069	0.508342	0.544508	0.482706	0.460467	0.535282	0.389684	0.400531	0.522546	0.54453	0.353311	0.431281	0.515125	0.5269	0.482503	0.506027
780	modA	0	0.958159	0.745097	0.200632	0	0	0	0	0	0.170203	0	0	0	0	0	0	0	0	0	0	0	0.0502884	0.828367	0.243142	0	0	0	0.0686781	-0.136716	0	0	0	0	0.190935	0	0	0	0	0	0.158656	0	0.0637002	0	0.0606181	0
781	modB	-0.0319877	1.24111	1.29236	0.105708	0	0.157375	0.155507	0.150883	0.173077	0	0.401592	0.297829	0.0818376	0.15446	0.140775	0	-0.0597584	0.160428	0.15592	0.165776	0.138358	0	0	0	0.310004	0.193956	0	0.414052	0	0.155371	0.233208	0.0819528	0.204345	0.0804174	0.201289	0.327004	0.111931	0.131951	0.156283	0.189131	0.283331	0.241167	0.133488	0.226659	0.278603
782	modC	-0.215982	0.339135	0.167949	0.610517	0.615503	0.798992	0.751183	0.687306	0.859454	1.62741	0.685761	0.576993	0.717194	0.791555	0.57134	0.23983	0.257147	0.800323	0.795279	0.721655	0.738543	0.802783	0.623505	0.620286	0.513745	0.646431	0.547864	0.436736	0.883405	0.696155	0.633513	0.689607	0.689128	0.855034	0.686526	0.775803	0.581022	0.734133	0.816612	0.800469	0.766434	0.7299	0.738055	0.713131	0.813661
783	ybhA	-0.315969	0	0	0	0.113541	0	0.0514398	0.113685	0	0	0	0	0	0	0.064885	-0.157486	0	0.00771578	0	0.0430339	0.014264	0	0	0	0	0.0255609	0	-0.0811825	0.0978507	0.116792	0	0.0227332	0	0.0115155	0	0	0	0	0	0	0	0.0317875	0	0.0152667	0
784	pgl	-0.109378	-0.0546939	-0.115662	0.0588563	0.144084	-0.00578434	0	-0.0349307	-0.0497277	0.320629	0.0596644	-0.0682429	0.0471555	-0.0154345	-0.00118002	-0.061237	-0.0724	0	-0.0106014	-0.0349307	-0.0696961	-0.0813543	-0.0437187	0.199483	0.0202389	0	-0.303779	-0.0946855	-0.112239	0	-0.075687	-0.0699043	0.104542	0	0	-0.0857873	-0.0432887	-0.0232781	-0.0386533	0	-0.176611	0.0365342	-0.0848559	0	0
785	ybhD	-0.196741	0	0	0	-0.0661147	0.0323177	0.15602	0	0	0	0.0282642	0	0	0.0798315	0.148578	0.00345783	0.528876	0.0392345	0.0283036	0.00205219	0	-0.011964	0	0.805944	1.78301	0.0467049	-0.135023	0.106865	-0.357131	0.142902	-0.0179493	0	0.0568115	0.0997958	0.140536	0.194679	0.248976	0	0	0.683698	0	0.215485	0	0.189466	0.246843
786	ybhH	0	0.0654222	0.404454	0.125338	0.123277	0.0949411	0.0110694	0.0851855	0.0703884	0.0753377	0	0.546209	0.481751	0.256783	0	-0.0290493	0	0.100377	0.0925326	0.0839541	0.367413	0	0	0	0.272698	0	0	-0.330708	0	0.0140907	0	0.183545	0.279332	0	0	0.167847	0.194109	0.0301713	0.0147961	0.965994	0.143505	0	0.0352602	0	0.0916035
787	ybhI	-0.21921	-0.517025	-0.327993	-0.200982	0.0968838	-0.468116	-0.154645	-0.299142	-0.387059	-0.38211	-0.58841	-0.386238	-0.325696	-0.477766	-0.663511	-0.550431	-0.380769	-0.45853	-0.347933	-0.372262	-0.532027	-0.651045	-0.784045	-0.671068	-0.402518	-0.593647	0.414298	0	0.0896506	-0.357615	-0.232228	-0.348902	-0.544028	-0.542116	-0.442651	-0.416665	-0.463953	-0.552276	-0.442651	0	-0.513943	-0.472933	-0.547187	-0.392025	-0.492738
788	ybhJ	0.0179164	0.853711	0.792743	0.596634	1.05032	0.90262	0.89297	0.873474	0.858677	0.863626	0.782326	0.734498	1.17004	0.89297	0.707225	0.074681	0.343727	0.912206	0.897803	0.873474	0.838708	0.718196	0.586691	1.07467	0.468217	0.777089	0.568619	0.440588	-0.558014	0.888121	0.761264	0.771834	0.701708	0.82862	0.803085	0.755951	0.531783	0.81846	0.803085	0.797923	0.731793	0.897803	0.823549	0.853711	0.627998
789	ybhC	0.0129692	0.305027	0.262605	0.210933	0.0436305	0.351156	0.37176	0.316241	0.347875	0.304538	0.345106	0.355898	0.0956002	0.282339	0.281435	0	0	0.325789	0.327244	0.25847	0.247683	0.993812	0.4689	0.222701	0.696616	0.248929	0.165942	0	0.145927	0.373698	0.242314	0.331874	0.183442	0.332285	0.161012	0.243146	0.117479	0.25663	0.28811	0.259785	0.409174	0.28555	0.418827	0.308574	0.331768
790	ybhB	0	0.544044	0.507692	0.300281	0.757422	0.553304	0.64237	0.56083	0.623868	0.567764	0.464216	0.501442	0.768581	0.678989	0.539038	0.576906	0.613774	0.612946	0.590259	0.681872	0.643774	1.34965	0.947975	0.420253	0.208359	0.503847	0.414054	0.467456	0.379711	0.625762	0.482893	0.474796	0.471603	0.593556	0.927413	0.474012	0.574493	0.558979	0.456948	0.528588	0.517717	0.682171	0.54614	0.565049	0.490704
791	bioA	-0.187536	0.902991	0.897812	1.32757	0.406372	0.877103	0.830082	0.905189	0.813879	0.882618	0.901297	0.820038	0.691816	0.825646	0.802481	0.353365	0.301279	0.94895	0.885741	0.866686	0.797675	0	0.271796	1.0155	1.155	0.897052	0.768832	0.152423	0.0730818	0.851311	0.914788	0.865597	0.984224	0.823532	0.526856	0.890907	0.808525	0.982494	1.04074	0.863544	1.0923	0.826087	0.872859	0.70631	0.74202
792	bioB	-0.356824	0.124221	0.109291	0.359694	0.365352	0	0.345583	0.173338	0.373679	0.317229	0.193683	0.312517	0.208701	0.252927	0.0494903	0	0	0.386207	0.344342	0.317726	0.247255	0.700319	0.294223	0.101723	0.112017	0.154037	0	-0.025659	0	0.190033	0.0192377	0.392364	0.116225	0.237368	0.208615	0	0	0.321314	0.396697	0.320406	0	0.256761	0.194086	0.594237	0.288404
793	bioF	-0.0563359	0.950792	0.831226	1.14894	0.782098	1.68667	0.650403	0.864363	0.602888	0.641539	0.773063	0.531468	0.63953	0.70429	0.791082	0.438996	0.334944	0.0240391	0.655567	0.0940925	0.786472	0.269268	0.532809	0.812221	0.833385	0.663182	1.04079	0.739942	0.439106	0.867194	0.817585	0.516535	0.729567	0.785607	0.846515	1.06593	1.35394	0.582433	0.525416	0.581131	1.3745	0.706273	0.682348	1.43363	0.451133
794	bioC	-0.361069	-0.0655117	-0.638617	-0.179732	-0.285338	0	-0.681247	-0.557886	-0.383836	-0.567734	-0.279753	-0.613296	-0.76132	-0.681247	-0.724135	-0.475261	-0.290945	1.62408	-0.676414	1.7859	-0.306937	0	-0.844669	-0.487411	-0.367439	-0.797128	-0.0759127	-0.581413	-0.919109	-0.543239	0.879106	-0.802383	-0.586795	-0.60274	-0.401852	-0.818266	-0.613863	-0.6129	-0.485418	-0.776294	0	-0.533557	-0.750668	-0.577649	-0.803362
795	bioD	0.375478	1.14165	1.20025	0.686427	1.00696	0.45469	1.4813	1.24785	1.49452	1.46082	1.248	1.44177	1.26925	1.42742	1.15488	0.874421	0.747519	0.502825	1.48097	0.23222	1.29097	1.68766	1.29262	1.00118	0.873568	1.35264	0.766563	0.439381	0.241616	1.25966	0.303309	1.49403	1.21088	1.28175	1.1953	0.928752	0.41658	1.47476	1.5164	1.45553	0.596028	1.43027	1.37994	0.658819	1.4156
796	uvrB	0.122527	-0.552735	-0.613703	-0.809812	0	-0.503825	-0.513475	3.07287	-0.547768	-0.542819	-0.624119	-0.171948	-0.736406	-0.513475	-0.699221	-1.33176	0.425236	-0.494239	-0.508642	0.0234974	-0.567737	-0.68825	-0.319754	-0.331777	-0.438228	-0.629356	0.329936	-0.173376	1.70528	-0.518325	-0.145181	-0.634612	-0.704738	-0.577826	-0.103361	0	0.35078	-0.587985	0.251075	-0.108522	-0.674652	-0.508642	-0.582897	-0.552735	-0.778447
797	ybhK	0.105255	0.792184	0.885062	1.7898	0.565715	0.841093	1.96682	0.652495	0.79715	0.802099	0.874645	0.749893	0.916205	0.831443	0.722621	1.01008	0.346019	0.850679	1.72323	0.887062	0.899102	0.623248	0.54664	1.2617	0.543912	0.869408	0.834402	1.96869	0.506002	0.826594	0.699737	0.78723	0.794027	0.844016	0.818481	0.925193	0.719039	0.833856	0.87609	0.813319	0.869109	0.836276	0.762022	1.87227	0.79724
798	moaA	0.0128297	-0.0248447	0	-0.0532562	-0.215947	0	-0.0099589	-0.012885	-0.0274227	-0.0312494	-0.0400993	-0.0771401	-0.0162147	0	0	-0.59624	-0.372251	0	-0.000270887	-0.0624285	0	0.108618	0.180203	0	0.0540297	0	-0.211154	0	-0.441671	-0.00729606	-0.12832	-0.0636905	-0.0546359	0	-0.0250379	0	-0.173986	0	-0.00209835	-0.0579039	0	0	0	0	-0.127624
799	moaB	0.1874	-0.244818	-0.194514	-0.253005	0	-0.205772	-0.201487	-0.230945	-0.231406	-0.215804	-0.233493	-0.0304491	-0.364464	-0.22762	-0.334517	-0.104506	0	-0.19679	-0.210118	-0.142867	-0.211944	0	0	0	0	-0.221808	-0.0513262	-0.243116	0	-0.214842	-0.114099	-0.210206	-0.239861	-0.15895	-0.223365	-0.278834	-0.10755	-0.2703	-0.153035	-0.285224	-0.0972197	-0.211718	-0.191377	-0.114063	-0.176149
800	moaC	0	0	0	0	0	0	0	0	0	0	0	0	0	0	0	0	0	0	0	0	0	0	0.174768	0	0	0	0	0	0	0	0	0	0	0	0	0	0	0	0	0	0	0	0	0	0
801	moaD	0	0	0	0	0	0	0	0	0	0	0	0	0	0	0	0	-0.00994164	0	0	0	0	0	0	0	0	0	0	0	0	0	0	0	0	0	0	0	0	0	0	0	0	0	0	0	0
802	moaE	0	0	0	0	0	0	0	0	0	0	0	0	0	0	0	0	0	0	0	0	0	0.678133	0.283798	0.700819	0.424726	0	0.146036	0	0	0	0	0	0	0.0458125	0	0	0	0	0	0	0.0785471	0	0	0	0
803	ybhL	0.281553	0.396908	0.33594	0.321649	0.366243	0.354908	0.345258	0.416671	0.310965	0.315914	0.234614	0.277695	0.357324	0.436167	0.485418	0.216511	0	0.364495	0.350091	0.416671	0.290997	0	0.478226	0	0	0.411196	0.0832421	0.164863	-0.0676394	0.340409	0.213553	0.224122	0.335814	0.243425	0.346282	0.390057	0.256798	0.270748	0.255373	0.432029	0.392543	0.350091	0.275837	0.305999	0.171195
804	ybhM	0	-0.0536592	0	0	-0.0725983	-0.0914819	-0.151182	-0.0633014	-0.105402	-0.168075	-0.105331	-0.0277112	-0.0726801	0	-0.0913625	0	0.324257	-0.0869498	-0.0937977	-0.000935649	-0.02453	-0.166252	-0.313204	0.0942804	-0.105772	-0.120207	-0.351191	-0.271757	0	-0.0993718	-0.261756	-0.252515	-0.0967973	-0.205171	-0.0933809	-0.143541	-0.326492	-0.238721	-0.224081	-0.0202536	-0.186825	-0.0830143	0	-0.146124	-0.00653626
805	ybhN	0	-0.285628	-0.280078	-0.567096	-0.0279738	-0.310435	-0.20204	-0.0264854	-0.166233	-0.223706	-0.333525	-0.0907301	0	-0.270759	-0.0890706	-0.119796	0	-0.302909	-0.3142	-0.198921	-0.0788742	0	0	0	0.068479	0	-0.0186628	0	0	-0.321349	-0.283485	-0.0421196	-0.327114	-0.24185	-0.318199	-0.289354	-0.248545	-0.145851	-0.258789	-0.265691	-0.202928	-0.137283	-0.196093	-0.334508	-0.0489487
806	clsB	-0.0622402	0.604128	0.352965	0.141962	0.157662	0.417445	0.382364	0.46399	0.444917	0.437587	0.337408	0.509572	0.516357	0.563498	0.417473	0	0.407305	0.446586	0.413822	0.538657	0.511508	0.249047	0.425341	0	0.0125338	0.41051	0.44321	0.394474	0.103411	0.446029	0.249756	0.567927	0.658277	0.371365	0.670193	0.328253	0.204131	0.495696	0.243222	0.447324	0.555737	0.557656	0.583845	0.229157	0.239278
807	ybhP	0	0.435389	0.388259	1.03786	0.790208	0.569515	0.64679	0.585659	0.674677	0.625138	0.531837	0.273559	0.273157	0.380105	0.734068	0.649423	0.242836	0.433557	0.608842	0.466313	0.468561	0.81088	0.159478	1.48663	0.591176	0.272979	0.742047	0.501109	1.80949	0.736381	1.07782	0.685553	0.696278	0.470886	0.578546	0.488062	0.486896	0.469871	0.838857	0.590154	0.750962	0.46474	0.445406	0.841868	0.933403
808	ybhQ	0.180027	0.339706	0.537196	0	0.304691	0.390155	0.594178	0.407789	0.286021	0.394097	0.335965	0.618404	0.673087	0.496087	0.355912	0	0	0.540315	0.327881	0.381474	0.357155	0.234037	1.01093	0	0.458083	0.758821	0.288243	0.53331	0	0.271378	0.200114	0.192612	0.131455	0.461317	0.15783	0.354271	0.477134	0.342991	0.191533	0.489113	0.219746	0.398492	0.297514	0.364917	0.579071
809	ybhR	0.040696	0	0	0	0	0	0	0.189684	0.222162	0	0.116005	0	0	0	0	0.0651284	0.371921	0.0839268	0.0603609	0	0	0.271118	0.0391191	0.758058	0.297402	0	0	0	0.778905	0.027649	0.489474	0.258498	0.00179462	0	0.132695	0.199392	0.0770626	0	0.115795	0	0	0	0.0554294	0	0
810	ybhS	0	0.72517	0.583239	0.840671	0.497594	0.618316	0.714782	0.477366	0.839074	0.582796	0.541513	0.695305	0.349154	0.680069	0.414256	0.211262	0.320544	0.550604	0.678851	0.593843	0.567145	0.463278	0.428754	0.127031	0.311586	0.440402	0.3383	0.413296	0.159285	0.610287	0.594744	0.973774	0.591212	0.539537	0.546308	0.608413	0.652153	0.551595	0.812386	0.560737	0.496222	0.612526	0.620882	0.668439	0.748754
811	ybhF	0.0929847	0.800538	0.796342	0.69726	0.588176	0.892189	0.843952	0.881486	0.71551	0.867403	0.779415	0.693271	1.32874	0.857837	0.978417	0.614045	0.195012	0.912074	0.851085	0.872832	0.848745	0.715556	0.961253	0.609139	0.920998	0.837824	0.670194	0.729157	0	0.875371	0.662367	0.767519	1.10176	0.8497	0.994917	0.909602	0.692404	0.834717	1.00886	1.01052	0.770199	0.889688	0.801005	0.82323	0.565391
812	ybhG	0	0.10531	0	-0.158929	-0.0601232	0	0	0	0	0	-0.0982362	-0.146065	-0.0855226	0	-0.0483377	0	0.174569	0	0	0.0394652	0	0	0.128988	-0.118394	0	0	0.0660704	-0.0956132	0	0	0	-0.0462286	-0.0538547	-0.0519426	-0.0149777	0	-0.16128	-0.0621025	0	-0.0826394	0	0	0	-0.0268516	-0.0910042
813	ybiH	-0.233237	0.0454426	0.120127	0.0792272	0.167083	0.156366	0.108195	0.323433	0.153314	0.164116	0.086607	0.0251072	0	0.244146	0.0324824	-0.124508	0	0.164829	0.152114	0.0616456	0.0999468	0.12151	0	0.0743851	0.309179	0.2379	0.670858	0	0.264902	0.18574	0.0946724	0.0564458	0	0.0910406	0.146412	0.167883	0	0.0922681	0.085654	0.0203397	0.448728	0.152114	0.209492	0.11319	0
814	rhlE	0.003854	0.385546	0.324147	0.469979	0.251336	0.386786	0.586275	0.415067	0.474671	0.414893	0.441903	0.498629	1.06991	0.343829	0.29987	0.698242	0.186186	0.390068	0.385136	0.577042	0.364903	0.212133	0.989144	0.708683	0.228678	0.537771	0.747585	1.11449	0.73326	0.423279	0.513293	0.49113	0.483687	0.361449	0.497095	0.582625	0.615756	0.260539	0.522113	0.545363	0.561684	0.385136	0	0.37004	0.188502
815	ybiA	0.00952248	0.0929012	0.0551644	0	0.0444501	0.130099	0.025521	0.0701053	0.0425182	0.176276	0	0.0191802	0.702541	0.133149	0.190549	0	-0.102773	0.137198	0.126532	0.115296	0.0827703	0.136486	0	0	0	0.120922	0	0.0234681	0.0837443	0.194415	0.190155	0.157132	0	0.0752992	0.076404	0.0843576	0	0.273968	0.0699709	0.0597153	0	0.126532	1.2977	0.0938798	0.287248
816	dinG	0.19225	2.00848	1.93343	1.76726	1.69881	1.90481	2.02037	2.00376	2.00677	2.0488	2.18665	1.94244	1.86728	2.06272	1.89166	1.2564	1.48566	2.05844	2.04631	2.01072	1.99944	1.89751	1.73665	1.68827	1.64288	1.78744	1.74532	1.52225	0.50032	2.04581	1.90814	1.89564	2.07513	2.00532	1.95049	1.90517	1.74043	1.981	2.35705	1.96781	1.92678	2.04614	1.99098	2.17337	2.23066
817	ybiB	-0.213086	0.435818	0.506244	0.356533	0.467224	1.19875	0.572679	0.558266	0.469226	0.283783	0.188047	0.169981	0.223451	0.360919	0.287517	0.301094	0	0.478505	0.467153	0.523428	0.406022	0.31308	0.459897	0.641679	0.336354	1.15793	0.326183	0.301343	0.918004	0.421244	0.475315	0.590656	0.342579	0.326191	0.472629	0.463594	0.166463	0.396975	0.439836	0.360223	0.234735	0.467985	0.372541	0.611368	0.196384
818	ybiC	-0.211865	0.594252	0.457194	0.569262	0.371661	0.224328	0.656792	0.645157	0.584756	2.35319	2.48601	2.59806	2.47097	0.916384	0.626589	0.266998	0.409523	0.61695	0.592851	0.545379	0.173787	0.350429	0.893553	0.211648	0.388812	0.115786	0.648711	0.533489	0	0.734543	0.578193	0.616759	0.591038	0.90888	0.53057	0.736896	0.630288	0.291966	0.4758	0.723481	1.50656	0.611149	0.674712	0.481414	0.52954
819	ybiJ	0	0.0154495	0.098336	0	0	0.0213656	0	0	0.207176	0	0	0	0	0	0	0.100205	0.239862	0.0429791	0.0779331	0.061318	0.943223	0.801011	1.27229	0.196252	0.45568	0.0329779	0	-0.0099425	0	0	0	0	0	0.199621	0	0.0532303	0.0681467	0.649539	0.159843	0.216117	0	0.0366787	0.0480125	0.0530338	0.148568
820	ybiI	0.0798539	0	0	0	-0.0609978	0	0	0	0	0	0	0.0844539	0.681928	0	-0.0561483	-0.0429695	0	0	0	0	0.202497	0.130796	0	0	0	0	-0.194754	-0.275774	0	0	0	-0.0503628	0	0	0	0	0	0	0	0	0.0844301	0	0	0	0.0957636
821	ybiX	0	0.0663011	0	0.112267	0	0.10814	0.113838	0.0775252	0.196926	0.0833779	0.0581362	0.0154309	0.366356	0.110312	0.0575173	0	0	0.10578	0.139046	0.255256	0	0	0	0.0167	0	0.233634	0	0.0589774	0	0.106763	0.18482	0	0.132641	0.0130487	0.324303	0.109886	0	0.713391	0.0750312	0.208096	0.316841	0.0951202	0.0236108	0.111429	0.129788
822	fiu	0.0319597	1.46333	1.74397	1.3948	1.17843	1.47405	1.33172	1.54606	1.36179	1.46328	1.5209	1.47319	1.12132	1.46924	1.34139	0.703228	1.36808	1.47889	1.46393	1.38818	1.41625	1.28438	1.3398	1.1986	1.29476	1.34679	1.44673	0.950195	1.05846	1.43306	1.32201	1.50088	1.21294	1.45347	1.35012	1.45094	1.48301	1.26822	1.41244	1.37401	1.27014	1.50213	1.39116	1.45165	1.33669
823	mcbA	0	0.00306553	0	0	0	0.0474299	0.257439	0.0978358	0.121226	0.0121797	0	0	0	0.0388224	0.167313	0.399302	0	0.0559774	0.0435504	0.0793425	0.0404056	0.472927	0	0	0.199502	0	0	0	0	0.0903761	0.0338622	0.038498	0.133942	0	0	0.0490367	0	0	0	0	0	0	0.0873584	0.00369669	0
824	rlmF	0.130407	-0.263141	-0.272355	-0.318534	-0.283441	-0.216618	-0.225797	-0.268732	-0.209637	-0.25371	-0.209093	-0.327759	-0.315902	-0.225797	0	0	0	-0.207499	-0.2212	-0.171172	-0.204241	0	-0.395185	0.601212	0.0508802	-0.287245	-0.572983	-0.000556406	-0.221718	-0.157239	0	-0.133015	-0.200174	-0.311399	-0.311298	-0.209791	-0.0649828	-0.296673	-0.311298	-0.316208	-0.379112	0.585756	-0.145491	-0.147169	-0.258332
825	ybiO	0.0834343	-0.616909	-0.341473	-0.855522	-0.580202	-0.583508	-0.590098	-0.261949	-0.296445	-0.610138	-0.372977	-0.38125	-0.44966	-0.590098	-0.851109	-1.15032	-1.69638	-0.576961	-0.586797	-0.627803	-0.651545	-0.506805	-0.506581	-0.983666	-0.756783	-0.352163	-0.270399	0.012107	0.155632	-0.6178	-0.463736	0.0751539	-0.456568	-0.292581	-0.651483	-0.732453	-0.143236	-0.640983	-0.651483	-0.655008	-0.70017	-0.660531	-0.686288	-0.655567	-0.844225
826	glnQ	-0.256115	0	0	0	0	0	0	0	0	0	0	0	0	0	0	0	-0.05467	0	0	0	0	0	0	0	0	0	0.175164	0.569873	0.313343	0	0	0	0	0	0	0	0.113987	0	0	0	0	0	0	0	0
827	glnP	-0.0146777	0.605461	0.571113	0.540546	0.4388	0.741541	0.649068	0.627368	0.622396	0.626245	0.515039	0.610779	0.462606	0.649068	0.47192	0	0.0531079	0.66403	0.652827	0.592467	0.606865	0.486989	0.466965	0.375356	0.420695	0.643906	0.660793	0.443036	0.0293335	0.63876	0.520487	0.522171	0.426181	0.664377	0.546477	0.527321	0.560802	0.580756	0.653765	0.548999	0.582532	0.652827	0.595074	0.618533	0.45605
828	glnH	0	0	0	0	0	0	0	0	0	0	0	0	0	0	0	0.525219	0	0	0	0	0	0	0.0094327	0	0	0	0	0	-0.133968	0	0	0	0	0	0	0	0	0	0	0	0	0	0	0	0
829	dps	-0.165627	0.575319	0.488803	0.700793	0.527184	0.542015	0.56119	0.568351	0.536422	0.539997	0.637192	0.420593	0.442668	0.56119	0.533249	0.78984	0.0880187	0.575082	0.56468	0.681779	0.522001	0.519931	0.534991	0.416272	0.319196	0.451354	0.510487	0.0901137	0	0.578929	0.551036	0.579911	0.66397	0.552296	0.602481	0.511553	0.370959	0.541044	0.503796	0.577512	0.503608	0.56468	0.511052	0.532836	0.327337
830	rhtA	-0.859661	1.78534	1.53287	1.5298	1.33187	1.58868	1.57185	1.42865	1.55852	1.56044	1.32587	1.5233	1.71391	1.57185	1.32151	0.84381	0.731264	1.57933	1.57373	1.49694	1.55075	1.4614	1.23024	1.40558	1.24928	1.53986	1.75018	1.33738	0.775847	1.43435	1.47815	1.34664	1.25181	1.65304	1.35879	1.20366	0.937701	1.32792	1.33501	1.49241	1.47976	1.57373	1.54485	1.55658	1.74005
831	ompX	-0.839417	0.893187	0.958453	0.763882	0.816533	1.04043	1.03919	1.3413	1.01157	1.01555	1.30154	0.904997	0.745229	1.03919	1.22862	0.584923	0.990724	1.05469	1.04308	1.05715	0.995481	0.919643	1.15372	0.804024	1.02572	0.939307	0.625676	0.715487	0.962932	1.3531	0.954337	1.28066	1.25837	1.18425	1.30584	1.66675	2.91183	1.48289	1.46397	0.983867	0.92406	1.04308	0.983269	1.00757	0.690121
832	ybiP	0	0	0	0	0	0	0	0	0	0	0	0	0	0	0	0	0	0	0	0	0	0	0	0	0	0	0	1.13808	0	0	0	0	0.29165	0	0	0	0.070174	0	0	0	0	0	0	0	0
833	mntS	0	0	0	0.0225238	0	0	0	0	0	0	0	0	0	0.0879052	0	0.201153	-0.275811	0	0	0	0	0	0	0	0	0	0.79367	8.03097e-05	0.255433	0	0	0	0	0	0	0	0.0701169	0	0	0	0	0	0.0344211	0	0
834	mntR	0	0	0	0	0	0	0	0	0	0	0	0	0	0	0	0	-0.109082	0	0	0	0	0	0	0	0	0	0.287755	0	0.382633	0	0	0	0	0	0	0	0	0.0478086	0	0	0	0	0	0	0
835	ybiR	-0.111876	0.659749	0.556878	0.401565	0.402155	0.572929	0.564763	0.548266	0.535746	0.539934	0.4455	0.629514	0.773816	0.50616	0.458876	0.0963595	0	0.58104	0.568853	0.522625	0.595773	0.519441	0.510732	0.321072	0.611035	0.46671	0	0.447759	0	0.56066	0.504602	0.539186	0.601769	0.638518	0.569986	0.60267	0.308678	1.09523	0.488706	0.484339	0.505306	0.568853	0.559998	0.608467	0.539399
836	ldtB	-0.0923488	0.676245	0.524419	0.677351	0.574878	0.61314	0.6076	0.603425	0.52419	0.590754	0.618124	0.486499	0.354073	0.615362	0.562377	0.237396	0.337203	0.618643	0.610375	0.679223	0.550808	0.740912	0.504328	0.705076	0	0.481425	1.0007	0.374379	0.146076	0.604816	0.647059	0.512416	0.431517	0.660086	0.741159	0.477656	0.341464	1.9531	0.461456	0.553034	0.512104	0.619147	0.476723	0.568192	0.385128
837	ybiT	-0.0957809	0.632154	0.674263	0.441615	0.617006	0.721684	0.717519	0.688052	0.893887	0.704855	0.806609	0.540654	0.600254	0.723533	0.735171	0.441284	0.140729	0.725821	0.719605	0.819631	0.694101	0.505248	0.495862	0.380542	1.94598	0.846455	0.309166	0.645975	0.50199	0.715426	0.59752	0.665239	0.634974	0.626589	0.570281	0.658384	0.99841	0	0.962351	0.676498	0.579933	0.693289	0.895176	0.67426	0.615383
838	ybiU	-0.326533	0.692068	0.631955	0.54771	0.524299	0.724483	0.716357	0.805202	0.731638	0.691646	0.605639	1.12527	0.633889	0.715586	0.737528	0.0430506	0.257586	0.732556	0.720427	0.813974	0.670663	0.586722	0.572473	0.779668	0.562289	0.724036	0.605831	0.569921	0.25296	0.712273	0.587903	0.614347	0.555294	0.644623	0.654567	0.600972	0.918377	0.741478	0.807502	0.636317	0.920756	0.852006	0.631279	0.814875	0.432119
839	ybiV	0.0119845	0.418508	0.369562	0.707295	0.348669	0.460934	0.452909	0.615644	0.879946	0.428508	0.364409	0.412655	0.446473	0.453064	0.779922	0.569282	0.890876	0.468906	0.456929	0.41389	0.407787	0.304062	0.375407	0.321945	0.0589704	0.335493	0.150664	0.246807	0.411597	0.448877	0.546895	0.352175	0.29386	0.602906	0.375382	0.338967	0.251318	0.373375	0.344795	0.37387	0.250853	0.430613	0.400504	0.393946	0.70917
840	ybiW	-0.474981	1.81002	1.74905	1.55294	1.50663	1.85893	2.34928	1.82978	1.81499	1.81993	2.23863	1.69081	1.62635	1.84928	1.66353	1.03099	1.30003	1.86851	1.85411	1.82978	1.79502	1.6745	1.543	1.53098	1.42453	1.7334	1.52493	0.896896	2.05926	1.84443	1.71757	1.72814	2.65802	1.78493	1.75939	1.71226	1.48809	2.27477	2.55187	1.75423	1.6881	1.85411	1.77986	1.81002	1.58431
841	ybiY	-0.269348	0.69422	0.683252	0.616392	0.799325	0.74313	0.777719	0.813984	0.878435	0.754136	0.822836	0.725007	0.610549	0.73348	0.597734	0.423687	0.517325	0.752716	0.788313	0.793232	0.729218	0.687954	0.477201	0.329568	0.445251	0.617599	0.772468	0.754555	1.17377	0.77863	0.751774	0.662343	0.842217	0.719129	0.743594	0.69646	0.522292	0.65897	0.843594	1.14065	0.722303	0.738313	0.793307	0.79422	0.568508
842	fsaA	0	0	0	0	0	0	0	0	0	0	0	0	0	0	0	-0.0507419	0	0	0	0	0	0	0	0.357333	0	0	0	0	0	0	0	0	0	0	0	0	0	0	0	0	0	0	0	0	0
843	moeB	0.00707485	0	-0.0588576	-0.0733295	-0.165186	0	0.0288041	0	0	0	0	-0.0171213	-0.120641	0	-0.0912841	0	-0.180434	0	0	0	0	-0.0826227	-0.00960031	0.106053	0.067382	-0.0180451	0	-0.152773	0.00777165	0	-0.104234	-0.0753647	-0.00792036	0	0	0	-0.104596	-0.00346683	-0.0156052	-0.0196802	-0.0633412	0	0	0	-0.0836561
844	moeA	0.147885	-0.129061	-0.0664864	-0.156807	0	-0.0801518	-0.089802	-0.109298	0.0614284	-0.119146	-0.200446	-0.141426	-0.264476	0	-0.239034	0.137442	0.0323791	-0.0705657	-0.0849688	-0.109298	0.0549794	-0.231527	0.245174	1.22195	-0.132484	0.0943173	0.0689014	0	-0.382008	-0.0946514	-0.0213179	-0.0807925	-0.277896	-0.0541524	-0.179687	-0.226821	0.631028	-0.162926	-0.173445	-0.176977	0	-0.0849688	-0.159223	-0.0290614	-0.0213117
845	iaaA	0.0716024	0.0740029	0.0130349	0.150259	-0.0351916	0.122912	0.108462	0.0937661	0.048255	0.0839184	0.00261826	0	0.390332	0.113262	0.26085	-0.440866	-0.308415	0.132499	0.118095	0.0937661	0.198178	0.105155	0.977988	-0.0383727	-0.0785817	0	0.308116	-0.216164	0	0.108413	0	0.325459	0.255333	0.215579	0.0233768	0	-0.0638259	0.205419	0.0233768	0.0182151	0.382913	0.118095	0.210508	0.0740029	0.445784
846	gsiA	0.274582	0.72664	0.165672	0.762044	0.715729	0.27555	0.265899	0.246403	0.231606	0.236555	0.155255	0.107427	0.0429689	0.265899	0.0801538	0.44761	0.00913709	0.285136	0.270733	0.246403	0.211638	0.091125	-0.0403798	-0.0524024	0.841147	0.150019	-0.0584514	0.313517	0.975879	0.26105	0.134194	0.644763	0.0746368	0.201549	0.676014	0.12888	-0.0952882	0.191389	0.176014	0.170852	0.604723	0.270733	0.196478	0.22664	0.000927144
847	gsiB	-0.326636	0.820313	0.660004	0.688222	0.284646	1.06922	0.859572	0.708609	0.789189	0.776459	0.613056	0.7011	0.701855	0.814401	0.912161	0.241283	0.137449	0.865324	0.858833	0.840076	0.728885	0.651122	0.524882	0.74127	0.587614	1.08612	0.71095	0.623555	0.96543	0.854469	1.12124	0.938436	0.86831	0.765938	0.746184	0.911027	0.698385	0.738565	0.746184	1.16452	0.869853	0.858833	0.658241	0.820313	0.7946
848	gsiC	0	0	0.165568	0.320011	0.387125	0	0	0.219112	0.0601493	0.089616	0.226454	0	0.419631	0.0752856	0.131096	-0.283623	0.454799	0.0224737	0.00928779	0	0.127376	0.0561259	0.0473513	0	0.0786758	0.0959582	0.0404524	0.441689	0.286549	0.000423478	0.011048	0	0	0.048807	0.0391711	0.0192088	0	0.0774945	0.0391711	0	0.575892	0.00928779	0.219849	0	0
849	gsiD	-0.115515	-0.0361385	0	0	0.151616	0.0334491	0.060359	0.028918	0.0769124	0	0	0.313447	0.460107	0	0.0426785	0	0.0710262	0	0	0.129303	0.113987	0	0	0.0179972	0	0	-0.203583	0	0.0513255	-0.00172844	-0.0109377	-0.118015	-0.0704945	0.0539441	0.0344315	-0.0406654	0	0	0.0344315	0.126872	0	0	0.00447164	0.109539	0.107887
850	yliE(pdeI)	0.401473	0.633015	0.572047	0.375938	1.17801	0.648475	0.611915	0.62386	1.56107	0.64293	0.56163	0.200355	0	0.672274	0.44385	0.853985	-0.376969	0.69151	0.677107	0.523475	0.504025	8.69717	10.9139	10.3899	10.1723	0.556393	0.347923	-0.280108	2.16996	0.667425	0.540568	0.551138	0.481012	1.55398	0.547957	0.535255	0.311087	0.597764	0.547957	0.450355	0.511097	0.677107	0.598381	0.523475	0.299415
851	yliF	0.46956	0.98755	0.926582	0.730473	0.684158	1.03646	1.02681	1.00731	0.992516	1.99747	0.916166	1.39666	1.13721	1.02681	0.841064	0.736841	-0.0224339	1.04605	1.03164	1.00731	1.30588	0.852035	0.72053	0.708508	0.93539	1.43925	0.702459	0.848404	-0.424175	1.02196	0.895104	0.905673	0.835547	0.962459	0.936924	0.88979	1.19394	0.952299	1.79858	0.931762	0.865633	1.03164	0.957388	0.98755	0.761837
852	rimO	0	0.17022	0.0962857	0.128144	0.0464656	0.204542	0.19777	0.184089	0.173705	0.177178	0.289952	0.273762	0.227697	0.19777	0.0213473	0	0.350747	0.211269	0.201162	0.184089	0.159692	0.0224899	0.111492	0.255584	0.151828	0.245105	0.174069	0.402198	0	0.323022	0.0979494	0.241417	0	0.138248	0.129259	0.230271	0.0977611	0.274137	0.117149	0.216477	0.0846636	0.201162	0.991758	0.17022	0.361823
853	bssR	0	0	0.0276969	0.0530959	0	0	0	0	0	0	0.070947	0.142722	0	0	0.299095	0	0.0350342	0	0	0	0	0	0	0	0	0	0	0.0814209	0.00228414	0	0	0	0.170225	0.0292414	0.0110604	0	0.06856	0	0	0	0	0	0	0	0
854	yliI	0	1.12382	0.957242	1.16795	1.21262	1.13669	1.13415	1.12902	1.12512	1.12642	1.09157	0.924616	0.888289	1.13415	0.636987	0.687495	0.447996	1.13921	1.13542	1.12902	1.11987	1.19342	1.01846	0.837333	0.828385	1.06856	0.993178	0.351603	0.208176	1.09778	1.3365	1.06718	0.563922	1.09721	1.10292	1.063	0.895697	1.07945	0.978914	0.957202	1.09173	1.13542	1.89376	1.12382	0.896919
855	gstB	0.122629	0.30669	0.456768	0.37301	0.345637	0.337581	0.331486	0.319172	0.309827	0.312953	0.290351	0.218845	0.347092	0.331486	0.535821	0.199015	0	0.343635	0.334538	0.319172	0.297215	0.273733	0.120502	0.273928	0.362469	0.240754	0.0988262	0.254733	0.492229	0.310879	0.36681	0.237435	0.932095	0.29546	0.276462	0.227403	0.315947	0.266883	0.458926	0.69549	0.22969	0.334538	0.676581	0.30669	0.476627
856	dacC	-0.314509	2.58007	2.5191	2.323	2.27668	2.62898	2.61933	2.59984	2.58504	2.58999	2.50869	2.46086	2.3964	2.61933	2.43359	1.80104	1.57009	2.63857	2.62417	2.59984	2.56507	2.03102	0.944176	1.83603	2.19458	1.77741	2.29498	1.66695	1.16835	2.61448	2.48763	2.4982	2.42807	2.55498	2.52945	2.48231	2.25814	2.54482	2.52945	2.52429	2.45816	2.62417	2.54991	2.58007	2.35436
857	deoR	-0.398388	0	0	0	0	0	0	0	0	0	0	0	0	0	0	0	0	0	0	0	0	0.413539	1.36888	0.464999	0	0.726037	0	0	0	0	0	0	0	0	0	0	0	0	0	0	0	0	0	0	0
858	ybjG	0.312822	0.723556	0.455267	0.361476	0.65312	0.507817	0.503202	0.493878	0.486801	0.489168	0.31985	0.362193	0.272538	0.503202	0.414367	0.735318	1.06909	0.512402	0	0	0.955512	0.419614	0.465416	1.38944	1.17079	0.344414	0.853672	0.665858	0	0.500883	0.440212	0.445267	0.890917	0.478117	0.699377	0.44014	0.56959	0.467567	0.394996	0.392527	0.80513	0.505513	0.47	0.485578	0.490661
859	mdfA	0.0858341	1.6984	1.7106	1.54008	1.50513	1.80615	1.79776	1.78081	1.76794	1.77224	1.91894	1.76865	1.71267	1.79776	1.63624	1.24207	0.829178	1.81449	3.29193	3.29497	1.62014	1.64578	1.6836	1.30152	1.46366	1.86927	1.01682	0.801016	0.66583	1.79354	1.68323	1.69242	1.48524	1.64505	1.65382	1.63664	1.41847	1.73297	1.82829	1.8238	1.55424	1.80196	1.73739	1.74402	1.6262
860	ybjH	0	0	0	0	0	0	0	0	0	0	0	0	0.146964	0	0	0	0	0	0	0	0	0	0	0.11044	0	0	0.484357	0	0	0	0	0	0.0213319	0.130894	0.000762957	0.0567879	0	0	0	0	0	0	0	0.0265145	0.12626
861	ybjI	0.118414	0	-0.0340982	0	0	-0.0011437	-0.0107939	-0.03029	-0.045087	-0.0401378	0	-0.0923434	0	-0.0107939	0	-0.00178392	-0.226987	0	0.958645	1.04046	-0.0650555	-0.108645	-0.163227	0	-0.127854	-0.126675	0.0962099	-0.111113	-0.325794	-0.0156433	-0.0655765	0	-0.125133	0	-0.0237563	-0.0708903	-0.218135	-0.0853041	-0.100679	0	-0.171971	-0.00596072	-0.0032922	0	0
862	ybjJ	0	0.177113	0.100845	0.127733	0	0.218268	0.210409	0.193207	0.182483	0.186514	0.173335	0.27856	0.558159	0.210409	0.22545	0.201902	-0.334451	0.226074	0	0	0.164896	0.0673099	0.00609162	0.379293	0	0.295013	0	0.168505	-0.0689853	0.20646	0.234789	0.280531	0.0467105	0.0990895	0.29219	0.068753	0.0739979	0.149734	0.137213	0.538418	0.0791591	0.214345	0.153878	0.165015	0.224394
863	rcdA	0.0570565	0.505459	0.53606	0.5649	0.278166	0.520969	0.517386	0.512798	0.504651	0.506489	0.620245	0.659975	0.162042	0.517386	0.365814	0.0898647	-0.0143952	0.524529	0.618555	0.608238	0.499888	0.454035	0.313462	0.106424	0.594238	0.599888	0.746643	0.366509	0.0361042	0.515585	0.455214	0.384868	0	0.0937518	0.602064	0.484068	0.567833	0.489716	0.484006	0.600305	0.457532	0.51918	0.491606	0.509769	0.0576939
864	rybB	0	0	0	0.0251659	0.225529	0	0	0	0	0	0	0.404164	0	0	0	0.204197	0	0	0.0138372	0.00328937	0	0	0	0	0	0.0970096	0.262317	0.122403	0	0	0	0	0.446259	0.419402	0.0714164	0	0	0	0	0.0709694	0	0	0	0	0.203323
865	ybjL	0	0.56057	0.605379	0.310239	0.51266	0.618996	0.613748	0.571317	0.595101	0.597792	0.585792	0.0686695	0.61915	0.613748	0.503885	0.440658	0.0570859	0.624208	0.54742	0.543879	0.552413	0.500081	0.529432	0.700134	0.545599	0.396147	0	0	-0.0179649	0.611111	0.701282	0.598276	0.59794	0.574264	0.436303	0.498826	0.202441	0.573232	0.564872	0.433785	0.526106	0.616377	0.575999	0.588392	0.565772
866	ybjM	0.696853	0	0.283141	0	0	0	0	0	0	0	0.240425	0	0	0	0	0	0.168782	0	0	0	0	0	0	0	0	0	0	0	0.646015	0	0	0	0	0	0	0	0	0	0	0	0	0	0	0	0
867	grxA	0	0.612765	0.256634	0.394777	0.496578	0.548438	0.540196	0.629645	0.510906	0.515133	0.184432	0.395647	0.451719	0.540196	0.577753	0.316934	0.0977602	0.556626	0.54541	0.524931	0.599951	0.453022	0.671172	0.445713	0.63838	0.440183	0.484923	1.09365	0.0176918	0.536054	0.397201	0.435406	0.414582	0.542225	0.463048	0.529493	0.614721	0.476556	0.463424	0.458656	0.402533	0.544324	0.480902	0.506769	0.590123
868	ybjC	0.216918	0	0	0	0	0	0	0	0	0	0	0	0	0	0	0	0	0	0	0	0	0	0	0	0	0	0.166019	0	0	0	0	0	0	0	0	0	0	0	0	0	0	0	0	0	0
869	nfsA	0	0	0	-0.0273755	0	0	0	0	0	0	0	0	0	0	0.0276543	0	-0.0419214	0	0	0	0	0	0	-0.111197	0	0	0.0909358	0	0	0	0	0	0	0	0	0	0	0	0	0	-0.017216	0	0	0	0
870	rimK	0.231667	-0.0560408	0	0	-0.359433	-0.0071312	-0.0167814	0	-0.0510745	-0.0461253	-0.00242544	-0.175254	0	-0.0167814	-0.0775269	0	0.0447366	0	-0.0119482	-0.0362775	0	0.414676	0	-0.168384	0	-0.132662	-0.341132	0	0	-0.0216308	-0.148487	0	-0.208044	-0.0811318	-0.106667	-0.153801	-0.0029689	-0.0912916	0	0	0	-0.0119482	-0.0862028	-0.0560408	-0.0317536
871	ybjN	0.0862811	0.166676	0.0911841	0.266444	0.0101876	0.202001	0.195031	0.240587	0.170263	0.511809	0.521418	0.38268	0.409131	0.387054	0.183868	0.121036	0.459043	0.317762	0.198522	0.188306	0.21774	0.423816	0.189832	0	0.142833	0.109236	0.0108315	0.139297	0.678271	0.191529	0.117675	0.232317	0.177465	0.148554	0.137468	0.157969	0.149454	0.145695	0.228219	0.192942	0.525747	0.208076	0.257947	0.166676	0
872	potF	-0.0010506	0.537477	0.886423	0.51389	0.414289	0.567364	0.561467	0.618352	0.540512	0	0	0	0	0.45601	0.371854	0.622391	0	0.333779	0.56442	0.53337	0.592132	0.862952	0.416084	0.63495	0.481935	0.495279	0.401744	0.487213	0	0.558504	0.441898	0.612939	0.379335	0.522145	0.490357	0.541562	0.467123	0.506084	0.607697	0.556959	0.313289	0.543402	0.470325	0.537477	0.841913
873	potG	-0.0504366	-0.0810367	0	0	0	-0.0321271	-0.0417772	0	-0.0760704	1.39465	1.44795	1.63388	1.44704	0	-0.127523	-0.40157	-0.0248429	0.589666	-0.0369441	0	0	-0.216552	0	-0.0600789	-0.00803363	-0.0576579	-0.107632	0	0.232958	-0.0466266	0	-0.162914	0	0	0	0	0	-0.116288	0	0	0	-0.0369441	-0.111199	0	0
874	potH	0.0462262	0.368285	0.40662	0.108413	0.168478	0.400911	0.394474	0.326499	0.371598	0	0	0	0.341527	0.594387	0.465175	0	0.184043	0.138324	0.397698	0.52271	0.346736	0.202303	0.650614	0.0600032	0.558474	0.276829	0.247617	0.505595	0.465969	0.391239	0.647747	0.309356	0.381868	0.351547	0.475755	0.29153	0.687077	0.430752	0.31622	0.408986	0.697911	0.581134	0.31882	0.368285	0.370035
875	potI	-0.0765551	0.814757	0.842373	0.834936	0.563842	0.848664	0.841974	0.958967	0.8182	0.581822	0.474726	0.38184	0.442196	0.794961	0.66744	0.498224	0.398749	0.897478	0.845324	0.912825	0.807071	0.743422	0.727407	0.816714	0.700442	0.88036	0.889355	0.188592	0.705832	0.838612	0.74682	0.708183	0.897068	0.797362	0.864027	0.749699	0.274597	0	0.783962	1.01555	0.510037	0.805526	0.906241	0.814757	0.98015
876	ybjO	0	0	0	0	0.00350535	0	0	0	0	0	0	0	0	0	0	0	0	0	0	0	0	0	0	0.0740491	0	0	0	0	0	0	0	0	0	0	0	0	0.306356	1.0746	0	0	0.124364	0	0	0	0
877	rlmC	0.0590674	0	0	0	0	0	0	0	0	0	0	0	0	0	0	0	0.207488	0	0	0	0	0	0	0	0	0	0	0.0243411	0.340233	0	0	0	0	0	0	0	0.052655	1.24026	0	0	0	0	0	0	0
878	artJ	0	0.873708	0.936742	0.678409	0.823348	0.908595	0.901712	0.855484	0.877251	0.940171	1.00295	1.01978	0.803431	0.913355	0.780556	0.82172	0.0550442	0.904989	0.905159	0.866911	0.862335	1.25088	0.782864	0.621295	0.755698	0.825155	0.668257	0.896407	0	0.898253	0.983955	1.04377	0.805712	0.855811	0.816703	0.803305	0.70623	0	0.836532	0.970873	0.869237	0.900815	0.875765	0.873708	0.611981
879	artM	0.024367	0.525181	0.441331	0.581198	0.265373	0.542469	0.539058	0.55107	0.526937	0.493951	0.419808	0.314719	0.424739	0.532249	0.466774	0.516689	0.580197	0.551965	0.540767	0.544387	0.520272	0.259786	0.372536	0.391765	0.182445	0.437191	0.637127	0.116747	0.278739	0.537344	0.506432	0.213535	0.507443	0.516312	0.519507	0.491019	0.538377	0.720543	0.50791	0.425361	0.664325	0.566243	0.617707	0.525181	0.738257
880	artQ	-0.102737	0.327636	0.314944	0.0341287	0.481412	0.362317	0.355475	0.332384	0.331158	0.351694	0.473166	0.382312	0.21481	0.358813	0.227015	0.348828	0.184691	0.366121	0.358902	0.33566	0.316806	0.436199	0.166857	0.244862	0.351582	0.401201	0.176598	0.735863	0	0.352036	0.255257	0.663061	0.30025	0.309845	0.285748	0.258123	0.192502	0.182974	0.291433	0.327343	0.249894	0.307197	0.255667	0.327636	0.0240289
881	artI	0	0	0	0	0	0	0	0	0	0	0	0	0	0	0	0	0	0	0	0	0	0	0	0	0	0	0	0	0	0	0	0	0	0	0	0	0	0	0	0	0	0	0	0	0
882	artP	-0.169455	1.88647	1.83058	1.9468	1.52157	1.92151	1.9146	1.90434	1.89003	1.88677	1.95688	1.90198	1.74793	1.91326	1.78024	1.29897	0.933668	1.92958	1.91806	1.90303	1.8758	1.70753	1.68377	1.64054	1.4914	1.78043	1.6618	0.810061	1.1228	1.91112	1.82298	1.87043	1.74543	1.8685	1.8526	1.81652	1.6186	1.54611	1.85033	1.8308	1.79565	2.13874	1.8851	1.88647	1.7822
883	ybjP	0	0	0	0	0	0	0	0	0	0	0	0.108521	0	0	0	0	0	0	0	0	0	0	0	0	0	0	0	0	0	0	0	0	0	0	0	0	0	0.907456	0	0	0	0	0	0	0
884	ybjQ	0.0759796	0	0	0	0	0	0	0	0	0	0	0.408488	0	0	0	0	0	0	0	0	0	0	0.12398	-0.0458953	0	0	0	0.207466	-0.298374	0	0	0	0	0	0	0	0	0	0	0	0	0	0	0	0
885	amiD	-0.0581971	1.1018	0.79051	0.593159	0.460457	0.86532	0.85875	0.845476	0.88086	0.838771	0.783417	0.665957	0.919733	0.85875	1.02076	0.964806	0.669397	0.871847	0.86204	0.845476	0.757976	0.908367	0.603085	0.522185	0.982642	0.779852	0.596438	0.803318	0	0.855448	0.66791	0.776274	0.728528	0.814937	0.797551	0.76546	0.687095	2.41145	0.797551	0.794037	0.685182	0.86204	0.747654	0.76819	0.655817
886	ybjS	-0.00821031	0.0143553	0.0701214	0.073019	0.274587	0.151945	0.144759	0.13024	0.0131514	0.122907	0.0623643	0	0.14896	0.144759	0	0.182939	0	0.159084	0.148358	0.13024	0.253287	0.149498	0.153359	0.187373	0.392907	0.0584647	0	0.234417	-0.435851	0.141148	0.282738	0.0545508	0.00232929	0.0968383	0.0778228	0.042723	0.369182	0	0.0778228	0.073979	0.17367	0.148358	0.241998	0.264459	0
887	ybjT	0	-0.557517	-0.838311	-0.509612	-0.473121	-0.722514	-0.525304	-0.562275	0.712184	-0.754509	-0.53643	-0.370852	-0.323606	-0.542779	2.66728	-0.374023	-0.482846	-0.714649	-0.726466	-0.746429	-0.774954	-0.39487	-0.130751	0.444294	-0.409851	-0.825514	0.0513615	-0.689176	-0.205034	-0.529283	-0.63337	-0.346923	-0.602885	-0.603745	-0.632664	-0.63773	-0.0325748	1.58273	-0.432664	-0.80842	-0.683193	-0.537946	-0.582265	-0.382038	0.095224
888	ltaE	-0.308426	-0.122606	-0.0234752	-0.0625512	-0.0615481	-0.0530722	-0.0873737	0	-0.18733	-0.088067	0	-0.0670324	-0.210516	0	1.65735	-0.0283322	-0.153563	-0.0444694	-0.0573952	-0.0792292	-0.110429	-0.0284523	-0.0679719	-0.148218	-0.203438	-0.165728	0.162433	-0.123031	0.496854	-0.0917257	-0.205571	0	-0.0708182	-0.0169189	0.0801982	-0.21034	-0.187032	1.22814	0.00707785	-0.147031	-0.103814	0	-0.149675	0.00582424	0.0700881
889	poxB	0.12535	1.04729	0.98632	1.04021	1.2439	1.0962	1.08655	1.06705	1.30225	1.0572	0.975903	1.17807	0.863617	1.08655	0.900802	0.518258	0.287304	1.10578	1.09138	1.06705	1.03229	0.911773	1.03027	0.768245	0.911794	0.970666	0.762196	1.17665	1.0318	1.3317	1.20484	0.965411	1.14528	1.0222	0.996662	0.949528	0.97536	1.01204	0.996662	0.9915	0.92537	1.09138	1.26713	1.04729	0.821575
890	hcr	-0.338404	0.930099	0.894534	0.696804	0.961453	0.958629	0.994667	0.809547	0.849662	0.935883	0.888458	0.777224	0.690877	0.953	1.30693	0.392331	0.587808	0.964221	0.955819	0.941627	1.12968	1.05938	1.0212	1.2296	0.489814	0.885403	0.763795	1.36367	0.826632	0.950171	0.876172	0.882337	1.1331	0.748796	0.900567	0.998072	0.658974	1.41348	1.19223	1.02256	0.775647	0.872486	0.912504	0.930099	1.84405
891	hcp	-0.216231	1.36438	1.31358	1.31682	1.19489	1.40514	1.81376	1.64501	1.53519	1.37264	1.30489	1.4317	1.47548	1.3971	1.11023	0.881857	0.821476	1.41313	1.40113	1.38085	1.43521	1.33479	1.44061	0.999767	1.47396	1.30053	1.12681	0.755953	0.540346	1.39306	1.28734	1.29615	1.15438	1.67681	1.32219	1.53292	1.26278	1.61959	1.23886	1.56789	1.42945	1.56779	1.33925	1.36438	0.877541
892	ybjE	0.195299	0	0	0	-0.188049	0	-0.0271464	0	0	0	-0.00901561	0	-0.142456	0	0	-0.194908	-0.254163	0	0	0	0	-0.159786	0	-0.104517	0	0	1.45397	-0.0414724	0.0922271	0	0	0	0.0483196	0	0	0	-0.0871022	0.00156943	0	-0.0817125	0	0	0	0	0
893	aqpZ	0.056314	-0.65045	-0.652595	-0.436939	-0.451186	-0.601541	-0.445356	-0.537454	-0.586661	-0.640535	-0.541652	-0.49996	-0.275942	-0.552367	-0.561346	-0.265728	-0.519503	-0.591955	-0.606358	-0.510709	-0.454572	-0.237893	-0.4613	-0.52352	-0.477599	-0.668248	0.00529861	-0.0579042	-0.131974	-0.43957	-0.613758	-0.359154	-0.0916236	-0.675541	-0.514128	-0.399151	-0.530225	-0.330149	-0.636577	-0.520535	-0.713544	-0.547534	-0.528556	-0.65045	-0.598291
894	ybjD	0.216337	0	0	0	0.471274	0	-0.0221042	0	0	0	0.149627	0.268465	0.468168	0	-0.00251971	-0.636109	-0.184978	0	0	-0.0198161	0	-0.0993663	0	0.108636	0	0.0468964	0.154475	-0.0499821	0.630089	0	-0.0976757	-0.171975	-0.164611	0.0292538	-0.0890658	-0.174525	0	0.0190939	-0.0482495	0	0.432427	0	0	0	-0.0694313
895	ybjX	-0.326979	3.12695	3.06599	2.86988	2.82356	3.17586	3.16621	3.14672	3.13192	3.13687	3.05557	3.00774	2.94328	3.16621	2.98047	2.34793	2.11697	3.18545	3.17105	3.14672	3.11195	2.99144	2.85994	2.84791	2.74146	3.05033	2.47143	3.04297	2.21523	3.16136	3.03451	3.04508	2.97495	3.10186	3.07633	3.02919	2.80503	3.0917	3.07633	3.86365	3.00504	3.17105	3.09679	3.12695	2.83237
896	macA	0.131615	0	0	0	0	0	0	0	0	0	0	0	0	0	0	0	0	0	0	0	0	0	0	0	0	0	0.370433	0.331821	0	0	0	0	0	0	0	0	0	0	0	0	0	0	0	0	0.0688706
897	macB	-0.737871	0.726966	1.22511	0.944712	0.440406	0.779029	0.770465	0.73944	0.740031	0.744423	0.672274	1.15797	1.04449	0.770465	0.516429	1.40328	0.914298	0.787536	0.718477	0.753163	0.666033	1.01659	0.400803	0.487989	1.54682	0.428566	0.482621	1.12295	0.737861	1.03023	0.541029	0.662963	0.60073	1.1319	0.898488	0.904279	1.41614	0.704341	0.67338	0.573561	1.09929	0.774754	0.700199	0.679347	0.909323
898	cspD	0	0.236431	0	0.337141	0.169103	0.223819	0.219474	0.265587	0.204035	0.206263	0.169661	0.0355733	0.231662	0.219474	0.492637	0	0.354059	0.228135	0.446759	0.210697	0.420153	0.120855	0.473003	0.0761697	0	1.12355	0.0734464	0	0.18981	0.161014	0.610395	0.164937	0.133365	0.101306	0.347838	0.136141	0.36193	0.185929	0.248271	0.626899	0.259464	0.22165	0.222852	0.426907	0.604154
899	clpS	-0.639203	1.41571	1.5548	1.30418	1.32313	1.39837	1.39239	1.4558	1.37116	1.37423	1.3239	1.38953	1.15915	1.39239	0.97551	1.1125	0.690808	1.4043	1.20491	1.38032	1.16833	1.45491	0.948513	1.19535	1.58063	0.511528	1.1916	0.702643	0.396122	1.43701	0.929908	1.3174	1.27399	1.42803	1.19389	1.40281	1.10951	1.34627	1.43199	0.952602	1.19738	1.39538	1.39704	1.17761	0.878846
900	clpA	0.497156	3.53605	3.47508	3.27898	3.23266	3.58496	3.57531	3.55582	3.54102	3.54597	3.46467	3.41684	3.35238	3.57531	3.38957	2.75702	2.52607	3.59455	3.58015	3.55582	3.52105	3.40054	3.26903	3.25701	3.15056	3.45943	3.25096	2.62293	2.12433	3.57046	3.44361	3.45418	3.38405	3.51096	3.48543	3.43829	3.21412	3.5008	3.48543	3.48027	3.41414	3.58015	3.50589	3.53605	3.31034
901	serW	0	0	0	0	0	0	0	0	0	0	0	0	0	0	0	0	0	0	0	0	0	0	0	0	0	0	0	0	0	0	0	0	0	0	0	0	0	0	0	0	0	0	0	0	0
902	infA	0.0635448	0.80487	0.743902	1.4885	0.488495	0.853779	0.844129	0.824633	0.809836	0.814785	0	0.488495	0.621199	0.844129	0.196014	0.827531	0.584818	0.863365	0.848962	0.824633	0.789867	0.669355	0.53785	0.488495	0	0.728248	3.97921	0	0.666567	0.83928	0.712423	0.722993	0.652867	0.488495	0.754244	0.70711	0.482942	0.769619	0.196014	0.749082	0.682952	0.848962	0.774708	0.80487	0.579157
903	aat	0.0654835	0	0	0.0592974	0.0129822	0	0	0	0	0	0.741155	0.197161	-0.0377982	0	0.462369	0.198309	0.210068	0	0	0	0	0	-0.0857457	0.037332	2.11932	0	0	0.34006	0.726578	0	0	0	0	0.291283	0	0	-0.176055	0	0.558229	0	0	0	0	0	0
904	cydC	0.0632093	-0.11062	0	-0.117697	-0.164013	0	-0.071361	-0.0908572	0	-0.100705	-0.182005	-0.229834	0	-0.071361	-0.257107	-0.63965	-0.219392	-0.0521248	-0.0665279	-0.0908572	-0.125623	0	-0.106204	-0.139663	0	0	0	-1.02374	0	0	-0.203067	0	-0.262624	-0.135711	-0.161247	0	0	-0.145871	0	0	-0.232538	-0.0665279	-0.140782	0	-0.336333
905	cydD	0.0493189	0.583633	0.855999	0.326556	0.280241	1.16086	0.622893	0.603397	0.5886	0.593549	0.512249	0.46442	0.928283	0.622893	0.437147	0.137937	-0.0198867	0.642129	0.627726	0.603397	0.568631	0.781452	0.316614	0.971258	0.19814	0.840345	0.298542	0	0.505242	0.618043	0.491187	0.501756	0.764964	0.558542	0.533007	1.15254	0.790026	0.881716	0.533007	1.72283	0.461716	0.627726	0.553471	0.583633	0.35792
906	trxB	0.292146	0.125298	0.0643299	3.0182	0.218146	0.174208	0.164557	0.145061	0.130264	0.135213	0.0539133	0.00608477	0.191627	0.164557	-0.0211882	-0.0074911	-0.134686	0.183794	0.169391	0.395061	0.360296	0.239783	-0.141722	0.346256	0.136045	0.0486766	1.97012	-0.0859859	-0.786427	0.159708	0.0328517	0.0434209	0.223295	0.100207	0.0746719	0.0275379	0.0533698	0.0900471	0.0746719	0.0695102	0.00338056	0.169391	0.095136	0.125298	0.399585
907	lrp	0.246722	-0.237943	-0.298911	-0.49502	-0.541336	-0.189034	-0.198684	-0.21818	-0.232977	-0.228028	-0.309328	-0.357157	0.578386	-0.198684	-0.38443	-0.0169731	1.074	-0.179448	-0.193851	-0.21818	-0.252946	-0.373458	-0.504963	-0.516986	-0.623437	-0.314565	-0.523035	1.17086	-0.649668	-0.203533	-0.33039	-0.31982	-0.389947	-0.263034	-0.288569	-0.335703	-0.559872	-0.273194	-0.288569	-0.293731	-0.359861	-0.193851	-0.268105	-0.237943	-0.463656
908	ftsK	0.300793	0.385493	0.324525	0.128416	1.0821	0.434403	0.424753	0.405256	0.390459	0.395409	0.314109	0.26628	0.201822	0.424753	0.239007	-0.393536	0.375509	0.443989	0.429586	0.405256	0.370491	0.249978	1.11847	0.106451	1	0.308872	0.100402	-0.527629	-1.02623	0.419903	0.293047	0.303616	0.23349	0.360402	0.334867	0.287733	0.0635651	0.350242	0.334867	0.329705	0.263576	0.429586	0.355331	0.385493	0.15978
909	lolA	0.406487	2.65468	2.49873	2.36072	2.35129	2.90359	2.59151	2.67444	2.61154	2.66459	2.58329	2.48833	2.47101	2.69394	2.50819	2.07565	1.81511	2.71317	2.69877	2.67444	3.32814	2.47324	2.70465	2.37564	2.26919	2.57806	2.36959	1.74156	1.24295	2.68909	2.56223	2.5728	2.70268	2.62959	2.56008	2.50819	2.33275	2.61943	2.56008	2.59889	2.53276	2.69877	2.62452	2.65468	2.32106
910	rarA	0.114968	0	0.474879	0.184398	0	0	0.512154	0	0.24053	0	0	0.23567	0	0	0	0	0.732862	0	0	0	0.0171127	0.229607	0	0	0	0	0	0	0	0	0	0	0	0	0.219855	0.243648	0	0	0.219855	0	0	0	0	0	0.53955
911	serS	-0.277584	0.466148	0.352415	0.188582	0.162756	0.515057	0.448501	0.485911	0.555499	0.476063	0.505874	0.320749	0.282477	0.505407	0.319662	1.7349	-0.256618	0.524643	0.621351	0.485911	0.449244	0.305121	0.773564	0.363212	0.0806544	0.389526	0.736612	0.173576	-0.167799	0.500558	0.549808	0.495382	0.425256	0.441057	0.502204	0.341316	0.255331	0.542008	0.502204	0.41036	0.34423	0.51024	0.547097	0.466148	0.578814
912	dmsA	0.351798	0.408437	0.347469	0.15136	0.105045	0.457347	0.447696	0.4282	0.413403	0.418352	0.587052	0.539224	0.621007	0.447696	0.761951	0.275648	0.398453	0.466933	0.70253	0.4282	0.393435	0.272922	2.23734	3.64196	0.272944	1.57036	0.373346	0.391555	0.904051	0.692847	0.315991	0.32656	0.756434	0.383346	0.607811	0.310677	0.0865089	0.373186	0.357811	0.296542	0.28652	0.45253	0.628275	0.408437	0.182724
913	dmsB	0	-0.249673	-0.310641	-0.362663	-0.371247	-0.200764	-0.210414	-0.22991	-0.153798	-0.148849	-0.321058	0	0	-0.210414	-0.123432	-0.232804	-0.532384	-0.191177	-0.114671	-0.139001	-0.173766	-0.20337	0	0	-0.453348	-0.326294	-0.534764	0	-0.0294629	-0.215263	-0.160301	-0.240641	-0.219858	-0.274764	-0.300299	-0.347433	-0.245696	-0.284924	-0.20939	0.224429	-0.37159	-0.205581	-0.279835	-0.249673	-0.475386
914	dmsC	0.193247	0	0	0	0	0	0	0	0	0	0	1.26395	1.01737	0	0	0	0	0	0	0	0	0.111969	0.617626	0	0	0	0	-0.280581	0	0	0	0	0	0	0	0	0	0.0802983	0	0	0	0	0	0	0
915	ycaC	0	0.416797	0.469041	0.231149	0.327691	0.394278	0.384628	0.360565	0.421764	0.426713	0.273984	0	0	0.384628	0.413168	0.181216	0.352776	0.403864	0.389461	0.365132	0.473224	0.323659	0.372279	0.280612	0.24559	0.340176	0.260803	0	0.479757	0.379779	0.467208	0.263492	0.193366	0.391706	0.294743	0.390466	0.422366	0	0.294743	0.296887	0.223451	0.389461	0.345926	0.345369	0.266614
916	ycaD	-0.591887	-0.027564	0	0	0	0	0	0.0159827	0	-0.0176486	-0.0989487	0.117383	-0.211235	0	0	0.39041	0.142577	0	0	-0.00780077	-0.0425662	0.0519751	0.464629	0	-0.246391	0	0	-0.0790324	0.0919669	0	0	0	-0.179567	-0.052655	0	0	0	1.20753	-0.0781901	0	0	0	0.142484	-0.027564	0.235647
917	ycaM	0.0678853	-0.482689	-0.334467	-0.644075	-0.242774	-0.394493	-0.706533	-0.606131	-0.733868	-0.425575	-0.631898	-0.0575529	-0.367417	-0.706533	-0.163581	-0.494971	-0.761781	-0.6912	-0.70268	-0.722073	-0.204792	0.0979723	0.51733	-0.0820883	0.337504	-0.480061	-0.588262	-0.447196	0.303494	-0.579964	-0.845427	-0.726792	-0.54479	-0.815798	-0.194635	-0.0823527	-0.489908	-0.273172	-0.647746	0	-0.646601	-0.70268	-0.631434	-0.737827	-0.458253
918	ycaN	0.0561474	-0.819292	-1.02451	0	-0.507436	-0.519185	-0.673597	-0.45348	-0.681549	-0.528227	0	-0.623921	-0.202724	-0.673597	-0.440336	0	-0.108287	-0.669136	-0.672476	-0.678118	-0.511177	0.00258617	-1.12333	-0.742897	-0.901179	-0.707714	-0.893736	0	0	-0.609504	-0.123599	-0.163537	-0.296688	-0.550838	-0.736	-0.602831	0	-0.611165	-0.629223	-0.569799	-0.283435	-0.672476	-0.624477	-0.682701	0.820442
919	ycaK	-0.0488734	-0.0930863	-0.200816	-0.568852	-0.239675	-0.51398	-0.390818	-0.550438	-0.416662	-0.543367	-0.527756	-0.527531	-0.704841	-0.390818	-0.644563	-0.332153	-0.315487	-0.376321	-0.387175	-0.405511	-0.466711	0.269881	-0.0289018	-0.323734	-0.6436	-0.376699	-0.60627	-0.61601	0.0846359	-0.307516	-0.447686	-0.431243	-0.677706	-0.36685	-0.291749	-0.514587	-0.397533	-0.562912	-0.371601	-0.646111	-0.497792	-0.387175	-0.356179	-0.420405	-0.6476
920	pflA	0	0.119545	0.0585769	0.0888912	0.042576	0.0255974	0.0159472	0	0	0	0.131726	0	0	0.0159472	0	-0.0168366	-0.123263	0.0351834	0.0207803	0	0	-0.158827	0	-0.0112353	0	0.803199	0	-0.0722916	0.0350791	0.0110978	0	0.0376679	0	0	0	0	0	0	0	0	0	0.0207803	0	0	0
921	pflB	0	0	0	0	0	0	0	0	0	0	0	0	0	0	0	0	0	0	0	0	0	0	0	0	0	0	0	0	0	0	0	0	0	0	0	0	0	0	0	0	0	0	0	0	0
922	focA	0.202259	1.06803	1.00706	1.07511	0.931305	1.11694	1.10729	1.08779	1.073	1.07795	0.996646	0.948817	1.14852	1.10729	0.921544	0.622334	0.822206	1.12653	1.11212	1.08779	1.05303	1.09918	0.80101	0.955655	1.01587	0.991409	1.31126	1.0419	0.640787	1.10244	1.30892	0.986153	0.916027	1.04294	1.0174	0.97027	0.746102	1.03278	1.0174	1.01224	1.37694	1.11212	1.03787	1.06803	0.842317
923	ycaO	-0.330061	0.147425	0.115662	0.0613188	0.339611	0.157217	0.176181	0.345172	0.113291	0.13507	0.249403	0.207667	0.025031	0.177673	0.0301471	-0.329865	0.370008	0.195022	0.146323	0.164999	0.136711	0.160674	0.520846	0.0935911	0	0.08508	0.123936	0.252439	0.496091	0.181983	0.0411238	0.0421571	0.313944	0.143565	0.12428	0.0446387	-0.0394297	0.177047	0.266518	0.0194527	0.148135	0.183302	0.119936	0.147425	0
924	ycaP	0.143795	0.40522	0.317606	0.684789	0.210966	0.522572	0.436732	0.37127	0.522521	0.472032	0.385131	0.366854	0.721389	0.432253	0.317596	0.0922578	-0.041435	0.437917	0.540804	0.411789	0.392356	0.458928	0.483898	0.229595	0.233649	0.362391	0.120414	0.143292	0.599691	0.404776	0.446785	0.475393	0.242135	0.341527	0.322776	0.420299	0.257137	0.2106	0.396062	0.621774	1.03734	0.429866	0.397203	0.40522	0.234713
925	serC	0.203178	0.666887	0.696183	0.318279	0.554214	0.768045	0.685945	0.641996	0.564935	0.743043	0.700813	0.67489	0.505632	0.664097	0.523324	0.314636	0.509041	0.693464	0.637252	0.654018	0.638223	0.588121	0.164239	0.823026	0.438578	0.632075	0.576827	0.381779	0.405934	0.435437	0.31931	0.729594	0.296474	0.776806	0.743357	0.66332	0.534762	0.801879	0.820157	0.495892	0.372762	0.68692	0.650868	0.666887	0.619495
926	aroA	0	0.0653326	0.183733	0.180524	0	0.184474	0.0354178	0.252092	0.180338	0.0459142	0.0707623	0	0.0918225	0.115415	0.188347	0.200656	0	0.106087	0.0915738	0.159099	0.134878	0.11366	0.374345	0.108314	0	0.0119504	0.312261	0.143368	0	0.818525	0.736508	0.101532	0.891341	0.0260034	0.0882103	0	0	0.654442	0.106734	0.779224	0.179402	0.096052	0	0.0653326	0
927	ycaL	0.215094	0.086091	0.057661	0.234317	0.220782	0.0329997	0.270404	0	0.215667	0.101051	0.00639329	0.139877	0.152709	0.213137	0	-0.0605783	-0.218412	0.110699	0.114207	0.0371381	0.0225129	0	1.04856	0.00529506	0.476256	0.0538579	0.377061	0.345361	0.430828	0	0	0	0	0.076757	0.00874796	0.235897	0	0	0.308376	0	0.363507	0.10464	0.231931	0.086091	0.238422
928	cmk	0	0	0	0	0	0	0	0	0	0	0	0	0	0	0	0	0	0	0	0	0	0	0	0	0	0	0	0	0	0	0	0	0	0	0	0	0	0	0	0	0	0	0	0	0
929	rpsA	0	0	0	0	0	0	0	0	0	0	0	0	0	0	0	0	0	0	0	0	0	0	0	0	0	0	0	0	0	0	0	0	0	0	0	0	0	0	0	0	0	0	0	0	0
930	ihfB	0.135224	-0.342264	-0.403232	-0.000707972	-0.191111	-0.293354	-0.303005	-0.322501	-0.246389	-0.241439	-0.23183	0.120819	-0.290086	-0.303005	-0.162844	-0.428523	-0.713058	-0.283768	-0.207262	-0.322501	-0.266357	-0.477779	0.00720352	0.192757	0.397641	-0.418885	-0.627355	-0.460992	-0.306279	-0.307854	-0.343801	-0.151414	-0.220399	-0.223267	-0.39289	-0.258206	-0.47747	-0.377515	-0.301981	0.12017	-0.0658476	-0.207262	-0.281517	-0.342264	-0.19536
931	ycaI	0.0619664	0.0292503	0	0.272173	0.225858	0.0781599	0.0685097	0.0490136	0.0342166	0.0391658	0.457866	0.349628	-0.00937776	0.0685097	0.675245	-0.035518	-0.124205	0.087746	0.0733429	0.0490136	0.0142481	0.686217	-0.237769	1.15383	-0.356243	0	0	-0.153376	0	0.0636603	0	0	-0.0125535	0.00415933	0	0	-0.0539428	0	0	-0.0265375	-0.0597433	0.0733429	0.499088	0.0292503	-0.0987824
932	msbA	0	0.321205	0.260237	0.0641278	0.0178126	0.370114	0.360464	0.340968	0.326171	0.33112	0.24982	0.201992	1.13753	0.360464	0.674719	-0.457825	0.311221	0.3797	0.365297	0.340968	0.806203	0.179456	2.25145	0.0421625	-0.055498	0.244583	0.0361134	-0.249417	-0.545026	0.355615	0.228759	1.03181	0.169202	0.296114	0.270579	0.223445	0.499277	0.285954	0.270579	0.182016	0.699287	0.365297	0.791043	1.11369	0.095492
933	lpxK	0.147077	-0.348512	-0.40948	-0.605589	-0.395548	-0.188491	-0.309252	-0.328748	-0.0102122	-0.338596	-0.419896	-0.291618	-0.0703355	-0.309252	-0.20778	0	-0.450726	-0.178905	-0.304419	-0.217637	-0.244619	0.0124681	0.190429	-0.258451	-0.017581	-0.202911	-0.38192	-0.685001	-0.0909875	-0.314102	-0.153354	-0.29442	-0.278293	-0.262492	-0.184025	-0.335161	0	-0.259698	0	0.166803	-0.324237	-0.304419	-0.378674	-0.146325	-0.314409
934	ycaQ	0	0	0	0	-0.0768012	0	0	0	0	0	0	0	-0.142916	0	0	-0.409186	0	0	0	0	-0.0175133	0.523389	0	0	0	0	-0.0662879	0	-0.401963	0	-0.147109	-0.0559308	0	0	-0.0877622	0	0.163082	-0.0291455	0	-0.0552241	-0.0789327	0	0	-0.0586791	-0.188344
935	ycaR	0	0.498014	0.0767152	0	0	0.125139	0.15467	0.102469	0.35022	0	0.0315764	0.18307	0	0.117633	0.0318664	0	0	0.132594	0.117261	0.361728	0.0354495	0	0.0399341	0.129324	0	0.286763	0	-0.177658	0	0.150898	0.0151951	0.00935725	0.228132	0.0675825	0.0477219	0.0480992	0	0	0.0847589	0.216476	0	0.121392	0.0636384	0.0870977	0
936	kdsB	-0.113336	0.127842	0.570844	0.524057	0.537033	0.496359	0.604253	0.486643	0.259489	0.791049	0.456261	0.421437	0.37104	0.493142	0.607334	0.323098	0.660981	0.499554	0.48236	0.264421	0.355115	1.0416	0.253462	0.164819	0.824212	0.232293	0.496043	0.153726	0.0836949	0.602637	0.44924	0.410588	0.207166	0.471692	0.46318	0.55858	0.0969171	0	0.574291	0.313372	0.378837	0.494753	0.470002	0.480056	0.328998
937	ycbJ	0	0	0	0	0	0	0	0	0	0	0	0	0	0	0	0.0420198	0	0	0.0278837	0	0.269864	0.602535	0	0	0	0	0	0	0	0	0	0.094894	0	0	0	0	0.406224	1.61905	0	0	0.0944232	0	0	0	0
938	ycbC	0.000726933	0.511799	0.404332	0.354722	0.608407	0.560709	0.682286	0.631562	0.516765	0.521714	0.59623	0.392586	0.428128	0.551058	0.465313	0.0742539	-0.0880594	0.570295	0.544738	0.622678	0.647347	0	0	0.232757	0.426306	0.593674	0.665939	0.315669	0	0.546209	0.419353	0.491964	0.459796	0.586708	0.461173	0.514039	0.0381819	0	0.412375	0.456011	0.308666	0.555892	0.481637	0.511799	0.20953
939	smtA	0.174719	0	0.0929984	0	0	0	0.137544	0	0	0	0.0883688	0	0	0	0	0.200407	-0.103259	0	0	0.0177678	0	1.26717	2.32101	0	0	0	0	0	-0.0875321	0	0	0	0	0	0	0	0.178399	0.176231	0.0975948	0	0.0868927	0	0	0	0.353112
940	mukF	-0.632197	1.89408	1.73184	1.62952	1.66688	1.9196	1.91457	1.9044	1.89668	1.85578	1.81336	1.76298	2.16413	1.87109	1.81766	1.0709	1.09888	1.9246	1.84818	1.9044	1.88626	1.7799	1.64238	1.66154	1.55513	1.76715	1.45904	2.24376	0.911368	1.91204	1.84585	1.80789	1.74587	1.88099	1.82419	1.75612	1.63917	1.87569	1.82419	1.75259	1.51213	1.91709	1.87835	1.89408	1.77632
941	mukE	-0.172399	0.682906	0.885458	0.697875	0.530527	0.729689	0.720458	0.70181	0.687656	0.779346	0.701581	0.706698	0.775478	0.807415	0.542788	0.771222	0.253349	0.738858	0.862904	0.70181	0.668556	0.640239	0.652275	0.589909	0.589819	0.783529	0.982815	0.15731	0.824889	0.715819	0.594479	0.691545	0.675334	0.658905	0.721437	0.763309	0.548887	0.649187	0.721437	0.854323	1.20298	0.725081	0.654055	0.682906	0.467006
942	mukB	0	0	0	0	0	0	0	0	0	0	0	0	0	0	0	0	0	0	0	0	0	0	0	0	0	0	0	0	0	0	0	0	0	0	0	0	0	0	0	0	0	0	0	0	0
943	ldtD	0.283189	0.338287	0.277319	0.0812097	0.563215	0.387196	0.377546	0.35805	0.343253	0.348202	0.266902	0.219073	0.154616	0.377546	0.191801	-0.440743	-0.143377	0.396782	0.382379	0.35805	0.323284	0.536105	0.0712669	0.0592444	0.286127	0.261665	0.0531953	-0.574836	-0.0167965	0.372697	0.24584	0.589743	0.186284	0.313196	0.287661	0.57386	0.349692	0.303036	0.620994	0.282499	0.216369	0.382379	0.308125	0.338287	0.445907
944	ycbK	0.0894379	0.492788	0.302312	0.40296	0.642359	0.492788	0.492788	0.635645	0.492788	0.492788	0	0.397967	0.476366	0.492788	0.370694	0	0.245757	0.492788	0.492788	0.492788	0.502178	0.381665	0.302312	0.607418	0.500967	0.726273	0.374946	0.77119	0	0.492788	0.424734	0.159454	0.650891	0.492089	0	0.159454	0.480966	0.708352	0.466554	0.159454	0.395263	0.492788	0.487018	0.492788	0.291467
945	ycbL	0.0162391	0.0243923	0.296758	0	0	0.0733019	0.0636518	0.0441556	0.0293586	0.0343078	0.456455	0	0	0.0636518	0	-0.134069	0	0.082888	0.0684849	0.0441556	0	0	0.0907059	0	0	0	0	0	1.37104	0.0588024	0	0.275849	0	0	0.477214	0.259966	0	0	0	0.301938	0	0.0684849	0	0.0243923	0
946	aspC	-0.0780711	-0.286665	-0.147633	-0.543742	0.00994249	-0.237756	-0.247406	-0.266902	-0.0816991	-0.27675	-0.35805	-0.405879	-0.270336	-0.247406	-0.433151	-0.378082	-0.896649	-0.22817	-0.242573	-0.266902	0.0983325	-0.42218	-0.353685	-0.565708	-0.272159	-0.363287	-0.571757	-0.599788	-0.219927	-0.252255	-0.379112	-0.168542	-0.438668	-0.311756	-0.137291	-0.184425	-0.608593	-0.321916	-0.337291	-0.142453	-0.408583	-0.242573	-0.316827	-0.286665	-0.512378
947	ompF	-0.0586852	0.969198	0.90823	1.42911	0.665806	1.01811	1.00846	0.988961	0.974164	11.1558	9.9574	10.5982	11.1113	1.00846	0.822712	0.390168	0.876206	1.02769	1.01329	0.988961	0.954196	0.833683	0.702178	0.690155	1.1837	1.09258	4.4929	2.01755	1.08624	1.00361	0.876752	0.887321	0.817195	0.944107	0.918572	0.871438	0.64727	2.81327	0.918572	0.91341	0.84728	1.01329	0.939036	0.969198	0.743485
948	asnS	0.712169	1.05063	0.989658	0.793549	0.747234	1.09954	1.08989	1.07039	1.05559	1.06054	0.979241	0.931413	0.866955	1.08989	0.90414	0.271596	0.040642	1.10912	1.09472	1.07039	1.03562	0.915111	0.783606	0.771584	0.665133	0.974005	0.765535	1.72247	1.6389	1.08504	0.95818	0.968749	0.898623	1.02554	1	0.952866	0.728698	1.01538	1	0.994838	0.928709	1.09472	1.02046	1.05063	0.824913
949	pncB	0	0	0	0	0	0	0	0	0	0	0	0	0	0	0	0	0	0	0	0	0	0	0	0	0	0	0	0	0	0	0	0	0	0	0	0	0	0	0	0	0	0	0	0	0
950	pepN	0	0	0	0	0	0	0	0	0	0	0	0	0	0	0	0	0	0	0	0	0	0	0	0	0	0	0	0	0	0	0	0	0	0	0	0	0	0	0	0	0	0	0	0	0
951	ssuB	-0.026738	0.248877	0.361916	0.238097	0.169851	0	0.28557	0.513029	0.253519	0.224252	0.088695	0.025958	0.370684	0.28557	0.153996	0.283551	-0.150116	0.388356	0.290088	0.141312	0.184145	0.376099	0.405285	-0.0135977	0	0.33126	0.210891	0	0.0347408	0.327156	0.555566	0.15928	0.194107	0.456934	0.499035	0.343353	0.271014	0.359721	0.332279	0.204139	0.582274	0.290088	0.286046	0.132556	0.0117729
952	ssuC	-0.0519206	0	0.00507381	0	0.254469	0.872884	0	0.104524	0	0	0	0	0	0	0.132577	0	0.171103	0.108731	0	0.196188	0.093479	0.422498	0	0.395143	0.698464	0.0466638	0	-0.29372	0.366855	0.0475175	0.0270803	0	0.157566	0.0483596	0.124765	0	0	0	0	0.184359	0.0844989	0	0	0.214422	0
953	ssuD	-0.0392983	0.231945	0.340213	0.368751	0.0550661	0	0.267869	0.559268	0.23649	1.71551	1.47511	1.68383	1.54022	0.267869	0.0338227	0.139306	0	0.228338	0.272292	0.445038	0.180338	0.758598	0.473878	0.35682	0.150227	0.217533	0.0943948	0.103678	0	0.23764	0.334306	0.340032	0.195119	0.165958	0.192775	0.125597	0	0.186618	0.355555	0.187334	0.766518	0.272292	0.289313	0.145055	0.391424
954	ssuA	-0.076819	-0.701492	-0.65238	-0.631509	-0.786579	-0.725211	-0.720347	-0.594538	-0.328729	-0.733945	-0.259299	-0.836468	-0.413964	-0.817908	-0.517336	-0.448631	-0.419055	-0.718757	-0.679071	-0.625723	-0.684722	-0.792721	-0.488486	-0.569048	-0.139357	-0.521411	-0.490243	-0.382091	-0.406984	-0.734972	-0.253624	-0.88365	-0.397794	-0.500168	-0.3874	-0.476316	-0.55809	-1.04756	-0.271546	-0.79642	-0.289667	-0.770574	-0.684038	-0.796129	-0.264936
955	ssuE	-0.230226	-0.56568	-0.247134	0	-0.133242	-0.757745	-0.791733	-0.81157	-0.275184	-0.815351	0	-0.48026	-0.314462	-0.645392	-0.563385	-0.112432	0	-0.755677	-0.68471	-0.587913	-0.793316	-0.594909	-0.490296	-0.702033	-0.184585	-0.38177	-0.167257	-0.0292799	0	-0.760872	-0.347665	-0.353482	-0.614335	-0.843527	-0.727861	-0.790189	-0.15286	-0.41268	-0.776642	-0.693181	-0.828598	-0.704318	-0.367913	-0.373846	-0.0520273
956	elfA	0	-0.168598	-0.125038	-0.456997	0	-0.0325773	0	0	-0.435561	0	-0.555562	0	0	0	0	-0.229969	-0.0406225	-0.0255601	-0.0978319	0	-0.0219913	-0.267799	-0.0947357	-0.0609617	-0.157305	-0.352501	-0.521927	0.00779114	-0.0643765	-0.0431914	-0.29398	0	0	0	0	0	0	0	0	-0.00536957	0	-0.0128646	-0.0247847	-0.0849117	0
957	elfD	0	0	0	0	0.0715205	0	0	0	0	0.0936441	0	0.0580738	0.0680916	0	0	0	-0.0904133	0	0	0.00836797	0	0.113222	0	0.0413404	0	0	0	0.170477	0	0	0	0	0.127141	0	0	0	0.168736	0.286324	0	0	0	0	0	-0.0651164	0
958	elfC	-0.565755	-0.656141	0.867853	-0.913218	-0.959533	-0.607232	-0.616882	-0.636378	-0.651175	-0.646226	-0.727526	-0.775354	-0.839812	-0.616882	-0.802627	-1.43517	-0.575712	-0.597646	-0.612049	-0.636378	-0.671143	-0.791656	0.076839	-0.935184	-1.04163	-0.732763	-0.941233	-0.569264	1.39157	-0.621731	-0.748588	-0.738018	0.0647147	0.318768	-0.706767	0.831061	0.438157	-0.691392	0.293233	-0.711929	-0.778059	-0.612049	-0.686303	-0.591025	0.703108
959	elfG	0.126138	0.129936	0.205867	0.470546	0.466734	0.172534	1.53627	0.147149	0.134261	0.122443	0.212923	0.316427	0.234723	0.164129	0.147512	-0.132439	-0.363393	0.180883	0.168339	0.147149	0.10074	0.0850035	0.000838372	0.637396	0	0.063201	0.552228	0.15705	0.392925	0.305067	0.0494179	0.0586234	0	0.108082	0.0858419	0.0447898	0.271084	0.0736694	0.0697129	0.200944	0.143347	0.168339	0.248827	0.129936	0.308584
960	ycbU	0	0	0	0	0	0	0.248888	0	0	0	0	0	0	0	0	0	0	0	0	0	0	0.0576051	0	0	0	0	0	0	0	0	0	0	0	0	0	0	0	0	0	0	0	0	0	0	0
961	ycbV	-0.149255	0	0	0	0	0	0	0	0	0	0	0	0	0	0	0	0.0454391	0	0	0	0	1.10952	0	0	0	0	0	0.449963	0	0	0	0	0.168749	0	0	0	0	0	0	0	0	0	0	0	0
962	ycbF	-0.0488717	1.03162	1.07333	0.847812	1.13525	1.0758	0.69339	1.04947	1.03611	1.15348	0.951018	0.891689	1.01242	1.06708	0.883184	0.730356	0.616238	1.08446	1.07145	1.04947	1.13098	0	1.06617	0.918419	0.660568	0.962417	0.986829	0	0.607829	1.04657	0.948124	0.95767	0.855169	1.00896	0.985897	0.943324	0.790086	1.17873	1.0988	1.14405	1.08432	1.07145	0.988251	1.03162	0.786061
963	pyrD	0	0	0	0	0	0	0	0	0	0	0	0	0	0	0	-0.141199	0	0	0	0	0	0	0	0	0	0	0	0	0.268613	0	0	0	0	0	0	0	0.283833	0	0	0	0	0	0	0	0
964	zapC	0	0	0	0	0	0	0	0	0	0	0	0	0	0	0	0	0	0	0	0	0	0	0	0	0	0	0	0	0	0	0	0	0	0	0	0	0	0	0	0	0	0	0	0	0
965	ycbX	0.0540421	0.902197	0.841229	0.978453	0.598805	0.951106	0.941456	0.92196	0.907163	0.912112	1.16415	0.782984	1.38519	0.941456	0.755711	0.4565	0.558879	0.960692	0.946289	0.92196	0.887195	0.766682	0.635177	0.623154	0.516703	0.825575	0.617105	1.09638	-0.176195	0.936607	0.80975	0.82032	0.750194	0.877106	0.851571	0.804437	1.44192	0.866946	0.851571	0.846409	0.780279	0.946289	0.872035	0.902197	0.676484
966	rlmL	0.449135	2.78759	2.72662	2.53051	2.4842	2.8365	2.82685	2.80735	2.79256	2.79751	2.71621	2.66838	2.60392	2.82685	2.64111	2.00856	1.77761	2.84609	2.83168	2.80735	2.77259	2.65208	2.52057	2.50855	2.4021	2.71097	2.5025	1.87447	1.37587	2.822	2.69515	2.70571	2.63559	2.7625	2.73697	2.68983	2.46566	2.75234	2.73697	3.7318	2.66567	2.83168	2.75743	2.78759	2.56188
967	uup	-0.00131741	1.1478	0.986833	1.17221	0.943943	1.09671	1.08706	1.06756	1.05277	1.15772	1.23491	0.928588	0.96413	1.08706	1.00131	0.927268	0.665688	1.1063	1.09189	1.06756	1.1328	1.01229	1.09161	1.38169	0.962308	1.07118	0.736556	0.666871	0.0168117	1.08221	1.04955	0.965924	1.0958	1.12271	0.997175	0.950041	0.825873	1.11255	0.997175	0.992013	1.22588	1.09189	1.01764	1.0478	0.822088
968	pqiA	-0.142563	0	0	0.0925483	0.00232796	0	0	0	0	0	0	0	-0.137068	0	-0.0145433	0	0.153126	0	0	0	-0.0192108	-0.00404917	0.238353	-0.0469916	-0.330115	0	0.130768	-0.0679984	-0.0401307	0	0.0290055	0	0	-0.028861	-0.0532859	0	0	0	-0.122197	0	-0.034521	0	0	0	-0.289672
969	pqiB	0	-0.972534	-1.0335	0.0165962	-0.775926	-0.923624	-0.933274	-0.952771	-0.967568	-0.962618	-1.04392	-1.09175	-0.587671	-0.933274	-0.611748	-0.751564	-0.690037	-0.914038	-0.428441	-0.952771	-0.977931	-0.606024	-0.739554	-1.22808	-0.692969	-1.04916	-1.25763	0.0677888	-0.410748	-0.938124	-1.06498	-1.05441	-0.332056	-0.983194	-0.996517	-0.570294	-1.29446	-1.00778	-0.16958	-0.528322	-1.07719	-0.928441	-1.0027	-0.972534	-0.26093
970	pqiC	0.304756	-0.577652	-0.23862	-0.834729	-0.481044	-0.528742	-0.538392	-0.557888	-0.372685	-0.567736	-0.449036	-0.296865	-0.554252	-0.538392	-0.524138	0.238775	0.0522988	-0.519156	-0.533559	-0.557888	-0.592654	0	-0.61487	-0.169068	0	-0.654273	1.2602	-0.773782	-0.407998	-0.543242	-0.670098	-0.659529	-0.329655	-0.602743	-0.628278	-0.675412	-0.89958	-0.612902	-0.628278	-0.633439	-0.699569	-0.533559	-0.407814	-0.577652	-0.221192
971	rmf	0	0	0	0	0	0	0	0	0	0	0	0	-0.0117839	0	0	-0.126591	-0.301947	0	0	0	0	1.22725	-0.0496697	-0.146044	1.31604	0	0	0	0.321196	0	0	0	0	0	0	0	0	0	0	0	0	0	0	0	-0.303621
972	fabA	0.401327	0.712304	0.651336	0.455227	0.408911	0.761213	0.751563	0.732067	0.71727	0.722219	0.640919	0.59309	0.528633	0.751563	0.565817	0	0	0.770799	0.756396	0.732067	0.697301	0	0.445284	0.433261	0	0.635682	0.427212	0.799181	0	0.746714	0.619857	0.630427	0.5603	0.687213	0.661677	0.614543	0.390375	0.677053	0.661677	0.656516	0.590386	0.756396	0.682142	0.712304	0.486591
973	ycbZ	0.328921	1.48013	1.43709	1.23984	1.50126	1.51465	1.50784	1.49408	1.48363	1.48712	1.42974	1.39598	1.29165	1.50784	3.87785	5.23667	1.11014	1.52142	1.51125	1.49408	1.46954	1.38447	1.29164	1.28315	1.09037	1.42604	1.27888	0.97763	0.89683	1.50442	1.41487	1.42233	1.37283	1.75653	1.44439	1.41112	1.25288	1.39642	1.44439	1.38192	1.39407	1.51125	1.45883	1.48013	1.26198
974	matP	0.144964	0.301238	0.247443	0.250876	0.327657	0.344393	0.335879	0.318676	0.30562	0.309987	0.238251	0.19605	0.315646	0.335879	1.17244	1.33644	0.381239	0.352852	0.340143	0.318676	0.288001	0.181666	0.0656322	0.0550241	0.314038	0.233631	0.0496867	0.0693584	0.137877	0.3316	0.219668	0.228993	0.167117	0.396746	0.256568	0.214979	0.0171837	0.446605	0.256568	0.428484	0.193664	0.340143	0.274624	0.301238	0.27855
975	ompA	-1.62452	0.507484	0.446516	0.250407	0.204092	0.556393	0.546743	0.527247	0.51245	0.517399	0.436099	0.388271	0.323813	0.546743	0.360998	1.72845	-0.5025	0.565979	0.551576	0.527247	0.492482	0.371969	0.240464	0.228441	0.121991	0.430862	0.222392	-0.405639	-0.904241	0.541894	0.415037	0.425607	0.355481	0.482393	0.456858	0.409724	0.185556	0.472233	0.456858	0.451696	0.385566	0.551576	0.477322	0.507484	0.281771
976	sulA	0	0	0	0	0	0	0	0	0	0	0	0	0	0	0	0	0	0	0	0	0	0	0	0	0	0	0	0	0	0	0	0	0	0	0	0	0	0	0	0	0	0	0	0	0
977	sxy	0.19785	1.07111	0.999259	0.885226	1.19707	1.09823	1.00798	0.945652	0.823927	1.07656	1.3723	1.52793	1.40359	1.05477	0.740489	0.187277	0.673336	1.10354	1.09549	1.08446	1.86895	6.03847	0.0273605	0.802728	0.722975	0.878204	0.770325	0.184034	0	1.09012	1.51533	1.02637	0.893238	1.05978	1.06672	1.06723	1.44662	0.745796	1.00554	1.0028	0.800131	1.03527	0.882976	1.07107	0.956029
978	yccS	0.0577155	0	0	0	0	0	0	0	0	0	0.140205	0	0.0279191	0	0	-0.228639	0	0	0	0	0	0	0	0	0	0	0	0	0.161385	0	0	0	0.059587	0	0	0	0	0.176339	0	0	0	0	0	0	0
979	yccF	0.0412059	0.636158	0.657928	0.493777	0.777449	0.679745	0.840939	0.926605	1.14046	0.645099	0.610597	0.484099	0.548021	0.747354	1.00443	0.84577	0.996705	0.688287	0.675593	0.648995	0.595444	0.331284	2.18962	0.614841	0.561445	0.868732	0.667549	1.58407	0.816013	0.666954	0.562825	0.561884	0.568727	0.608638	0.543684	0.448403	0.241287	0.86361	0.66605	0.661208	0.934286	0.796025	0.952106	0.636252	1.4149
980	helD	-0.173017	1.06117	1.02945	1.857	0.712751	1.0695	1.31258	0.988309	0.888865	1.06558	1.03843	0.849533	1.57899	1.04929	0.835532	1.91255	0.422759	1.07113	1.07234	0.940377	1.51757	0.982221	0.68057	1.50986	0.984981	0.870374	3.04587	0.841135	2.4782	1.07043	1.28078	1.01323	0.804023	2.0102	1.52169	1.42802	1.28634	0.615772	1.00277	0.995578	1.10682	1.03367	0.799629	1.06361	0.715206
981	mgsA	-0.0279365	0.0740954	0	0	0.164113	0.115172	0	0	0.059642	0	0	0	0	0	0	0	0	0.123223	0	0	0	0	0.109328	0	0.000949687	0	0.267243	0.254627	0.874654	0	0	0.0368531	0	0.146192	0.134742	0	0.00233596	0	0.01417	0.0585462	0.291734	0.110781	0.0391854	0	0
982	yccT	-0.449334	0.141591	0.160937	0	0.0484717	0.139593	0.295071	0.209403	0.169804	0.219481	0.155498	0.430355	0	0.236802	0.150281	0.0689468	0.270538	0.139201	0.245351	0.420107	0.32142	0.283279	0	0.427234	0.28814	0.270665	1.0037	1.09018	1.31025	0.238022	0.284276	0.165075	0.407122	1.1658	1.21069	1.11265	1.63387	0.717184	0.198232	0.159325	0.0235363	0.132366	0.365599	0.211976	0.0066966
983	yccU	-0.515795	0.563363	0.549294	0.763039	0.320141	0.575107	0.518981	0.569008	0.443018	0.554759	0.546147	0.309601	0.531232	0.562143	0.275128	0.115274	0.517839	0.577409	0.55914	0.412931	0.46564	0.887198	0.963862	0.361459	0.593058	0	0	0	0	0.557899	0.332543	0.681175	0.299273	0	0	0	0	0.325346	0.4096	0.691034	0.672318	0.579646	0.285454	0.553488	0.675981
984	hspQ	-0.2135	0.261564	0.237308	0.247285	0.705298	0.281987	0.300525	0.274988	0.601216	0.273945	0.232627	0.277763	0.743014	0.287576	0.900842	0	0.437903	0.28599	0.291087	0.321811	0.181605	0	0.0800119	0	0	1.83731	0.862929	0.141543	0	0.28623	0.365335	0.124241	0.655269	0.323345	0.294637	0.318477	0.00646083	0.25838	0.583951	0.13407	0.329984	0.278288	0.630744	0.268972	0.370339
985	rlmI	0	1.31475	1.28103	0.96973	0.763187	1.34076	1.34373	1.3205	1.09684	1.31865	1.27608	1.30891	0.725821	1.33294	0.758841	0.977731	0.929648	1.34586	1.33635	1.35952	1.49525	1.23528	0.99877	1.47533	1.13238	0.0573185	0.810199	0.783322	0.736006	1.33133	1.4179	1.2884	0.98441	1.51985	1.51824	1.45124	1.48709	1.40116	1.07235	1.30137	1.08133	1.33676	1.11589	1.31351	1.10874
986	yccX	0	0	0	0	0	0	0	0	0	0	0	0	0	0	0	0	0	0	0	0	0	0	0	0	0	0	0	0	0	0	0	0	0	0	0	0	0	0	0	0	0	0	0	0	0
987	tusE	0	0	0	0	0	0	0	0	0	0	0	0	1.12067	0	0.124835	0	0.675493	0	0	0	0.519905	0	0	0.275792	0	0.896222	0	0	0	0	0	0	1.89375	0	0	0	0	0	0	0	0	0	0	0	0
988	yccA	-0.166015	3.12695	3.06599	2.86988	2.82356	3.17586	3.16621	3.14672	3.13192	3.13687	3.05557	3.00774	1.82261	3.16621	2.85563	2.84793	1.44148	3.18545	3.17105	3.14672	2.59205	2.99144	3.35994	2.57212	2.74146	2.15411	2.84186	2.21383	2.21523	3.16136	3.03451	3.04508	1.0812	3.10186	3.07633	3.02919	2.80503	3.0917	3.07633	3.07117	3.00504	3.17105	3.09679	3.12695	2.90124
989	serT	-1.88771	1.73156	1.71632	1.66729	1.78071	1.74378	1.74137	1.7365	1.7328	1.73404	1.71371	1.32675	1.68564	1.74137	1.69494	1.5368	1.10456	1.74618	1.74258	1.7365	1.35281	1.32268	1.86292	1.7868	1.8333	1.7124	1.28528	1.7014	2.93789	1.74016	1.70845	1.71109	1.69356	1.47528	1.7189	1.70712	1.65108	1.72274	1.7189	1.71761	1.70108	1.74258	1.72402	1.73156	1.67513
990	hyaA	0	1.25866	1.21294	1.06585	0.906118	1.29534	1.28811	1.27348	1.26239	1.2661	1.20512	1.54425	1.12091	1.28811	1.1488	0.67439	0.875675	1.30253	1.29173	1.27348	1.62241	1.53203	0.860277	0.924381	0.771422	1.2012	1.41984	0.3757	0.140601	1.28447	1.18933	1.19725	1.14466	1.48984	1.22069	1.18534	1.01722	1.23222	1.22069	1.21682	1.16722	1.29173	1.23604	1.25866	1.08938
991	hyaB	0.726423	0.880989	0.835263	0.688182	1.02845	0.917672	0.910434	0.895812	0.884714	0.888426	0.827451	0.66658	0.743236	0.910434	0.771125	0.296717	0	0.924861	0.914059	0.895812	0.744738	0.654353	1.27509	1.04671	1.18623	0.823523	0.542171	0.790508	-0.111181	0.906797	0.811655	0.819582	0.766987	1.11217	0.84302	0.807669	0.639543	0.854551	0.84302	0.839149	0.789551	0.914059	0.858368	0.880989	0.711705
992	hyaC	-0.100157	-0.233341	-0.360976	-0.357085	-0.364402	-0.251098	-0.194081	-0.0802443	-0.0809526	-0.212851	-0.371392	-0.24689	-0.217012	-0.260748	-0.31316	-0.25012	-0.322406	-0.241512	-0.255915	-0.280244	-0.31501	-0.168856	0	-0.312383	-0.31317	0	0.0229246	-0.196681	-0.244957	-0.198931	-0.0588399	-0.181885	-0.452011	-0.258432	-0.150634	-0.264434	-0.382938	-0.113797	-0.09681	-0.222462	-0.355258	-0.255915	-0.263503	-0.127677	-0.32572
993	hyaD	-0.00337324	0	0	0	0	0	0	0	-0.0569425	-0.0144201	0	0	0	0	0	-0.118589	0	0	0	0	0	0	0.547732	0	0	0.145878	0	0.0645311	0	0	-0.0912917	0	0	0	0	0	0	0	0	0	0	0	0	0	0
994	hyaE	0.0811124	0	0	0	0	0	0	0	0	0	0	0	0	0	0	0	0	0	0	0	0	0	-0.0118185	0	0	0	0.224819	0	0.0576007	0	0	0	0	0	0	0	0	0	0	0	0	0	0	0	0
995	hyaF	-0.0286117	0.903275	0.850078	0.722366	0.528533	0.895497	0.939051	0.815938	0.975209	0.978327	0.920786	0.866733	0.678842	0.939051	0.878194	0.517876	0.684475	0.951173	0.93683	0.92926	0.846327	0.791679	0.565828	0.65319	0.603013	0.892044	0.525089	0.440756	0.237267	0.935995	0.94022	1.05796	0.686198	0.818452	0.766282	0.822292	0.774368	0.876985	0.838203	0.75277	0.873277	0.942096	1.05198	0.91431	0.791513
996	cbdA	-0.232104	0.394913	0.461817	0.361464	0.508623	0.56446	0.429295	0.464735	0.493633	0.49602	0.447981	0.508431	0.354175	0.429295	0.418394	0.495737	0.375594	0.438571	0.424252	0.423387	0.521186	0.0928844	0.448387	0.55641	0.445736	0.468189	0.608893	0.304463	0.326905	0.426956	0.283614	0.244224	0.468798	0.486197	0.623374	0.320641	0.460207	0.372207	0.324062	0.606521	0.401683	0.431626	0.298167	0.410362	0.445724
997	cbdB	-0.222379	0	0.244335	0.261084	0	0.0801136	0.0952812	0.526273	0.073519	0.0731062	0.103546	0.0276953	0.435423	0.0952812	0.0228193	0	0	0.093677	0	0.141897	0.171571	0.758462	0.0416726	0.162584	0.121944	0.0666356	0	0.242865	0.253413	0.0956856	0.215507	0.185806	0.112572	0.0833901	0.006182	0.103813	0	0	0.179501	0.204431	0	0.0948781	0.149785	0.0985551	0.340418
998	cbdX	0	0.214241	0.160649	0.0375651	0.310126	0.0782994	0.0755924	0	0.0416528	0.0454088	0	0	0.00976421	0.0755924	0	-0.1192	0	0.0901909	0.207493	0	0	0.196817	0	0	0	0	0.0311008	0	0	0.0719121	0	0	0.238825	0.217638	0.172758	0.167105	0	0.21624	0.21061	0.0359964	0.168613	0.0792603	0.038566	0.045798	0
999	appA	0.00298921	0.199952	0.351191	0.160311	0	0.338237	0.326665	0.721467	0.326076	0.328065	0.457434	0.248473	0.0648281	0.326665	0.22253	0.013025	0.174973	0.334395	0.249565	0.71994	0.404355	0	0.187764	0.233675	0.282395	0.280445	0.0647024	-0.0540711	-0.293764	0.324717	0.314928	0.424507	0	0.149339	0.181581	0.112445	0.288308	0.163065	0.28516	0.234247	0.115366	0.328607	0.272673	0.31089	0.291682
1000	etk	0	0	0	0	0	0	0	0	0	0	0	0	0	0	0	0	0	0	0	0	0	0	0	0	0	0	0	0	0	0	0	0	0	0	0	0	0	0	0	0	0	0	0	0	0
1001	etp	0.178183	0.830565	0.769597	0.573488	1.18217	0.879474	0.869824	0.850328	0.835531	0.84048	0.75918	0.711352	0.646894	1.01268	0.910502	0.337249	0.332718	0.889061	0.874657	0.850328	0.815563	0.69505	0.101046	0.920803	0.445072	1.03966	0.688331	0.0602995	0.443115	0.864975	0.738119	0.748688	0.821419	0.805474	0.779939	0.732805	0.651494	0.795314	0.922796	0.774777	0.708647	0.874657	0.800403	0.973422	0.747709
1002	gfcE	0.0308365	0	0	0	0	0	0	0	0	0	0	0	0	0	0	-0.269193	-0.394573	0	0	0	0	-0.000678502	1.20561	0	-0.125657	0	0	-0.113045	-0.505648	0	0	0	-0.0171666	0	0	0	0	0	0	0	0	0	0	0	0
1003	gfcD	0	0.449732	0.20941	0.623482	0.243833	0.331975	0.322325	0.302828	0.288031	0.292981	0.211681	0.663852	0.0993942	0.322325	0.136579	0.199023	-0.259633	0.341561	0.327158	0.302828	0.268063	0.14755	0	0.00402288	0	0.0439594	0.428801	0	0.24281	0.317475	0.190619	0.201188	0.131062	0.257974	0.184197	0.185305	0	0.247814	0.232439	0.227277	0.161148	0.327158	0.252903	0.283065	0.0573524
1004	gfcC	0.131682	0	0.0190303	0	0	0	0	0	0	0	0	0	0	0	0	-0.0050121	-0.352285	0	0	0	0	0	0	0	0	0.243727	0	-0.358134	-0.0997221	0	0	0	0	0	0.0723632	0	0	0	0	0	0	0	0	0	0
1005	gfcB	0.00704951	-0.647078	-0.631371	-0.750551	-0.775476	-0.796125	-1.0659	-0.812599	-0.889874	-0.905122	-0.810213	-1.01111	-0.805026	-0.845058	-0.52824	-0.617933	0	-0.790707	-0.798848	-0.812599	-0.877647	-0.969277	-0.51873	-0.62147	-0.789313	0	-0.907118	-0.354213	-0.2254	-0.804321	-1.05785	-1.02854	-0.808559	-0.792058	-0.595039	-1.064	-0.736395	-0.997764	-0.661563	-0.649909	-0.75983	-1.06106	-0.751446	-0.518045	-1.22977
1006	gfcA	0	0	0	0	0	0	0	0	0	0	0	0	0	0	0	0	0	0	0	0	0	0	0	0	0	0	0	0.0183116	0.172403	0	0	0	0	0	0	0	0	0	0	0	0	0.0564171	0	0	0
1007	insA	0.196629	-0.430131	-0.460429	0	-0.124294	-0.356767	0	-0.369439	-0.306961	-0.286764	-0.179719	-0.188773	0	-0.317484	-0.458393	-0.220306	-0.150672	-0.352599	-0.358861	-0.369439	-0.0613786	-0.36804	-0.639003	-0.0707845	-0.409093	0	-0.468664	0	0	-0.363071	-0.232916	0	0	-0.379279	0	-0.0648654	0	0	-0.201975	-0.464736	-0.508334	0	-0.424962	-0.478518	0
1008	insB1	0	0	0	0	0	0	0	0	0	0	0	0	0	0	0	0	0	0	0	0	0	0	0	0	0	0	0	0	0	0	0	0	0	0	0	0	0	0	0	0	0	0	0	0	0
1009	cspH	0	0	0	-0.279204	0	-0.115153	0	-0.127825	-0.0653472	-0.0451503	0	0	-0.063262	-0.0758703	-0.0784337	-0.0204491	0	-0.110985	-0.117247	-0.127825	-0.264209	-0.126426	0	-0.573921	-0.389702	-0.799431	-0.00482785	0	0	-0.121457	0	0	-0.0790183	-0.026554	-0.151859	0	0	-0.106608	-0.182584	0	-0.155609	0	-0.0722371	0	-0.00273517
1010	cspG	0.110385	0	0	0	0	0	0	0	0	0	0	0	0	0	0	0	0	0	0	0	0	0	0	0	0	0	0	0	-0.136375	0	0	0	0	0	0	0.0597342	0.034608	0	0	0	0	0	0	0	0
1011	ymcE	0.0312397	0	0	0.689212	0.642897	0	0	0	0	0	0	0	0.762618	0	0.799803	0	0.890766	0.00478506	0	0	0	0	0	0	0	0	0	0.0148553	0.245818	0	0	1.44937	0	0	0	0	1.64847	0	0	0	0	0	0	0	0
1012	gnsA	0	1.69844	1.66361	0.86233	0.88218	1.72639	1.72088	1.70974	1.70128	1.70411	1.65765	1.63032	0.830871	1.57802	1.10065	1.08615	0	1.72708	1.72364	1.70974	1.68987	0.524946	1.403	1.53899	1.47816	0.642166	1.53553	0.496346	0	1.71811	1.41919	0.202282	1.38516	1.54125	1.52666	1.58285	0	1.6783	1.66951	1.66657	1.62878	1.6914	1.68121	1.90059	1.42661
1013	yccM	-0.0659182	0.359072	0.306814	0.138721	0.0990218	0.400995	0.392723	0.376012	0.363329	0.367571	0.297885	0.25689	0.20164	0.678437	0.662084	1.0256	-0.226301	0.409211	0.396866	0.376012	0.346213	2.43504	0.415912	0.119893	0.0286495	2.31839	0.114708	0.889001	0.706745	0.388567	0.732679	0.288892	0.68163	0.62328	0.601393	0.275278	0.687226	0.328857	0.315678	0.311254	0.254572	0.404925	0.333219	0.954776	0.451318
1014	torS	0.61745	1.65635	1.59538	1.39927	1.35295	1.70526	1.69561	1.67611	1.66131	1.66626	2.58496	1.53713	1.47268	1.69561	1.50986	2.87732	0.646363	1.71484	1.70044	1.67611	1.64134	1.52083	1.38933	1.3773	1.27085	1.57973	1.37126	0.743225	1.24462	1.69076	1.5639	1.57447	1.50434	1.63126	1.60572	1.55859	2.33442	1.6211	1.60572	1.60056	1.53443	1.70044	1.62619	1.65635	1.43063
1015	torT	0	0	0	1.3417	1.17219	0	0	0.0522967	1.33565	0.0432961	0	0	-0.0205246	0	0.268557	0.391666	0	0	0	0.143695	0.0205219	0	0.117841	-0.0196302	0	0	0.510557	0.0969055	0	0	0	0	0	0	0	0.0309045	0.153678	0	0	-0.0382317	0	0	0.00128981	0	-0.0263385
1016	torR	0.141625	-0.0530956	-0.114064	0	0	-0.0597415	-0.0693917	-0.0333323	0	-0.0431801	-0.0919823	-0.172309	-0.228785	-0.0693917	-0.199582	0	-0.0964828	-0.0501555	-0.00900298	-0.0333323	-0.123653	-0.133055	-0.00983962	-0.380059	-0.29498	-0.0741613	-0.17152	-0.267054	0.0437235	0	-0.0899863	-0.134973	-0.149543	-0.0781865	-0.0481661	-0.0953001	-0.231415	-0.143902	-0.159277	0	-0.142515	0	-0.0832575	-0.0530956	0
1017	torC	0.0685497	0.877385	0.816417	0.575794	0.505041	0.867471	0.857821	0.835249	0.74496	0.82593	0.747177	0.699349	0.693714	0.857821	0.715102	0.462667	0.366922	0.877057	0.862654	0.829872	0.802352	0.74187	0.54461	0.539519	0.433068	0.859587	1.02595	0.404737	0.216881	0.852972	0.784939	0.736685	0.784206	0.793471	0.767936	0.777807	0.546417	0.783311	0.767936	0.992591	0.696644	0.921478	0.847147	0.818562	0.651672
1018	torA	-0.518497	0.060968	0	-0.196109	-0.242424	0.109878	1.10023	0.0807313	0.0659343	0.0708835	-0.0104166	-0.0582451	-0.122703	0.100227	-0.0855181	-0.718062	-0.949016	0.119464	0.105061	0.0807313	0.0459659	-0.074547	-0.206052	-0.218074	-0.324525	-0.0156533	-0.224123	0.732808	2.73671	0.095378	-0.0314782	-0.020909	-0.0910351	0.035877	1.01034	-0.036792	-0.26096	0.0257172	0.0103419	0.00518024	-0.0609493	0.105061	0.030806	0.060968	-0.164745
1019	torD	0.0861003	0.312841	0.433691	0.351167	0.153536	0.36175	0.443009	0.332604	0.499625	0.322756	0.347039	0.193627	0.125549	0.3521	0.257264	0	0	0.371336	0.356933	0.332604	0.388748	0.999543	0.152643	0.359704	0.109166	0.236219	0.0277493	0.663981	0.105365	0.347251	0.455391	0.375051	0.539922	0.378659	0.353124	0.396899	0.0818216	0	0.353124	0.257053	0.372741	0.356933	0.373588	0.312841	0.450764
1020	cbpM	0	0	0	0	0	0	0	0	0	0	0	0	0	0	0	-0.421568	-0.469255	0	0	0	0	0	0	0	0	0	-0.094296	0	0	0	0	0	0	0	0	0	-0.131133	0.155545	0	0	0	0	0	0	0
1021	cbpA	-0.0427221	-0.501087	-0.562055	-0.305318	-0.720913	-0.737892	-0.604685	-0.767038	-0.638978	-0.776886	-0.262483	-0.536734	-0.601192	-0.747542	-0.564007	-0.101749	0	-0.728306	-0.742709	-0.767038	-0.516089	0	1.60187	-0.830941	-0.88658	-0.863423	-0.691883	-0.389935	-0.832492	-0.752391	-0.509967	-0.642255	-0.569524	-0.526178	-0.69457	-0.598847	-0.406168	0.163723	-0.69457	-0.842589	-0.324796	-0.599852	-0.364117	-0.786801	-0.500377
1022	yccE	-0.155629	0	0	0.16776	0	0	0	0	0	0	0.211775	0	0.0199146	0	0	-0.0976777	0.0436652	0	0	0	0	-0.107822	0.225442	-0.0148385	0	0	0	0	0	0	0	0	0	0	0	0	0	1.3239	0	0	0	0	0	0	0
1023	agp	0.0199004	-0.994056	-1.05502	-1.00113	-0.651208	-0.945147	-0.954797	-0.974293	-0.98909	-0.984141	-0.815441	-1.11327	-0.927727	-0.954797	-0.890542	0.0193952	0.108007	-0.935561	-0.699964	-0.578052	-1.00906	-1.10262	-0.761076	-1.01939	-0.62955	-1.07068	-1.02915	-0.3091	-0.0577018	-0.959646	-1.0865	-1.07593	-0.396059	-1.01915	-0.794682	-0.841816	-0.565984	-1.02931	-1.04468	-0.799844	-0.469733	-0.949964	-1.02422	-0.994056	-0.573529
1024	yccJ	0	0	0	0	0	0	0	0	0	0	0	0	0	0	0	0	0	0	0	0	0	0	0.141304	0	0.0217726	0	0	0	0.107082	0	0	0	0	0	0	0	0	0	0	0	0.316242	0	0	0	0
1025	wrbA	-0.137911	0.819455	0.855952	0.615	0.961667	0.905896	0.897597	0.881054	0.868105	0.94219	0.871943	0.806811	0.929155	0.897597	0.872162	0.390712	0.343014	0.91414	0.901754	0.88083	0.892432	0.752757	0.700948	1.21581	0.527318	0.179666	0.653614	0.149962	0.955152	0.893427	0.791538	0.93759	0.966281	0.80498	0.820296	0.77976	0.553678	0.906329	0.824419	0.764493	0.678104	0.901754	0.843365	0.828288	0.988376
1026	ymdF	0	0	0	0.149171	0	0	0	0	0	0	0	0	0	0	0	0.0850692	0	0	0	0	0	0	0	0	0	0.811487	0	0.272339	0	0	0	0	0	0.0555136	0	0	0	0	0	0	0	0	0	0.0525914	0
1027	rutG	0.0573648	0.487932	0.348074	0.292637	0.247998	0.337805	0.332401	0.318309	0.313197	0.284128	0.242441	0.311657	0.210691	0.332401	0	0.0527769	0	0.343174	0.335108	0.321483	0.386015	0.188397	0	0.100678	0.549191	0.100893	0.505175	0.128313	0.208126	0.329686	0.197078	0.187885	0.292615	0.265049	0.282065	0.25567	0.513328	0.249432	0.265573	0.734631	0.513182	0.335108	0.271644	0.264709	0.0556379
1028	rutF	-0.0639273	0	0	0	0	0	0	0	0	0	0	0	0	0	0	0	-0.421609	0	0	0	0	0	0	0	0	0	0	0	0	0	0	0	0	0	0	0	0	0	0	0	0	0	0	0	0
1029	rutE	0	0	0	0	0	0	0	0.00912214	0	0.0101019	0	0	0	0	0.76464	0.0301422	0	0	0	0	0	0.0970751	0.879871	0	0	0.00949935	0.0230264	0	0.188483	0	0.130944	0	0	0	0	0	0	0	0	0	0	0	0	0.0678697	0
1030	rutD	0.0121592	0.750318	0.633265	0.906117	0.493705	0.809951	0.800687	0.776333	0.767766	0.757662	0.696469	0.786553	0.641821	0.800687	1.05978	0.310491	0.0312553	0.819154	0.805327	0.781971	0.742596	0.684045	0	1.247	0.72973	0.695236	0.520621	0.401916	0.318993	0.796032	0.737327	0.874513	1.01119	0.812576	0.714397	0.669148	0.74988	0.850345	0.8423	0.819766	0.626597	0.805327	0.880907	0.722632	0.555484
1031	rutC	0.0291555	0	0.175004	0	0.0531849	0	0	0	0	0.0135351	0	0	0.020437	0	0.155987	0	0	0	0	0	0	0	0.225581	0	0	0	0	0	0	0	0	0	0	0	0	0	0.0053377	0	0.0205321	0	0	0	0.0500677	0	0
1032	rutB	-0.0164774	0	0	0	0	0	0	0	-0.00682653	0	0	0	0	0	0.307675	-0.471167	-0.179298	0	0	0	0	-0.00810685	0	0	-0.0927032	0	0	-0.425127	-0.166451	0	0	0	0	-0.0472597	0	0	0	0	0	0	-0.0896995	0	0	0	-0.171308
1033	rutA	-0.0304598	-0.126591	-0.0567107	-0.0862132	-0.236036	-0.0898308	-0.167808	-0.109609	-0.0523893	-0.116291	-0.171459	-0.171771	-0.147245	-0.0963791	-0.284814	-0.0461487	-0.189582	-0.083326	-0.0930995	-0.0377719	-0.168914	-0.191352	-0.2761	-0.0866351	-0.198996	-0.107155	-0.214923	-0.214408	0	-0.0996698	0	-0.250007	-0.0752192	-0.0154741	-0.0573728	-0.228642	-0.169634	-0.223579	-0.0930871	-0.211659	-0.123272	-0.0930995	0	-0.158734	-0.175058
1034	rutR	0.0527841	-0.123475	-0.0851712	-0.318384	-0.21137	-0.199176	-0.0625224	-0.217913	-0.156484	-0.224243	-0.276508	-0.27154	-0.191012	-0.205379	0	-0.0162993	-0.234791	-0.193013	-0.202272	-0.20309	-0.168833	0.0414448	0.087114	0.311693	0	-0.315589	0	0.0385033	0.157081	-0.208497	-0.335179	-0.140396	-0.271728	-0.199586	-0.263163	-0.114892	-0.422749	0.344614	-0.191734	-0.064915	-0.202189	-0.202272	-0.272895	-0.159189	-0.182423
1035	putA	0.296663	0.876128	-0.18484	-0.380949	0.572736	-0.0749621	-0.0846122	-0.104108	-0.118905	-0.113956	-0.195256	-0.243085	-0.307543	-0.0846122	-0.270358	-0.902901	-1.13386	-0.065376	-0.0797791	-0.104108	-0.138874	-0.259387	-0.390891	-0.402914	0.490635	-0.200493	-0.408963	1.28493	-1.5356	-0.0894616	-0.216318	-0.205749	-0.275875	-0.148963	-0.174498	-0.221632	-0.4458	-0.159123	-0.174498	0.820341	-0.245789	-0.0797791	-0.154034	-0.123872	-0.349584
1036	putP	-0.362852	1.87724	1.67341	1.47731	1.80027	1.78329	1.75404	1.71288	1.88221	1.7443	1.663	1.75803	1.44732	1.9165	1.51313	1.38392	1.34182	1.79288	1.7578	1.75415	1.71938	1.54766	1.40094	1.82462	1.44201	1.80062	2.1898	1.4523	1.20408	1.76879	1.64194	1.79536	1.72524	1.70929	1.63969	1.63662	1.40267	1.67009	1.96947	1.67859	2.08429	1.77847	1.70422	1.73438	1.50867
1037	efeU	0.0209157	0	0	0	0	0	0.0686038	0.144434	0	0	0	0	0.36188	0	0.261679	0	0	0	0.0723629	0	0	0.179218	0.232492	0	0.174068	0	0.104366	0.0838522	0	0	0	0	0	0	0.154248	0	0.0342299	0.101645	0	0	0.198848	0	0	0	0
1038	efeO	0.27801	0.812898	0.75193	1.3483	0.509506	0.861808	0.783554	0.688227	1.31786	0.822814	0.741514	0.693685	0.267347	0.852158	0.404733	0.533869	0.302914	0.871394	0.784628	0.832662	0.797896	0.498166	0.313387	0.533856	0.753337	0.736277	0.423441	1.1084	-0.0988265	0.847308	0.720452	1.23102	0.660895	0.787807	0.608024	0.715138	0.45674	0.676002	0.762272	0.757111	0.992132	0.856991	0.782736	1.3129	1.08719
1039	efeB	0.0833313	0.798052	0.737084	0.826753	0.683363	0.837197	0.77628	0.709893	0.701673	0.787075	0.692589	0.678839	0.747818	0.837312	0.624867	0.936015	0.705061	0.842522	0.834521	0.817816	0.78305	1.64392	0.531033	0.668836	0.346532	0.856346	0.385129	0.078108	0.843408	0.741088	0.705606	0.893352	0.58086	0.751641	0.747426	0.700292	0.993117	0.762802	0.72929	0.744751	0.54253	0.834521	0.767891	0.798052	0.97234
1040	phoH	0.180775	0	0	0.0520249	0.0188284	0.0162756	0.10172	0.179871	0.16891	0	0.0567984	0	0.110939	0	0.0444982	0	0	0.0233763	0.0127074	0	0	0	0	0.0836239	0.110046	0.108475	0.213054	0.344703	0	0.152291	0	0.0380384	0.108649	0.0355344	0	0	0	0	0.0302267	0.329189	0.222675	0.0127074	0	0	0
1041	pgaD	0	-0.108711	-0.107179	-0.0792276	-0.12441	-0.0598012	-0.00695139	0	0	0.052232	0	-0.040424	-0.00582167	-0.00695139	-0.0311368	0	-0.457135	-0.0502152	-0.0646182	-0.0889476	-0.123713	0	-0.250731	-0.127133	0	0	0	0	-0.542419	-0.0743008	-0.138657	-0.190588	-0.0366538	-0.0088018	-0.0968369	0	-0.144079	-0.143962	-0.159337	0	0	-0.0646182	-0.138873	-0.108711	-0.271924
1042	pgaC	0.233596	0.13015	0.0691822	0.162668	-0.0861547	0.0758047	0.0490657	0.0139393	0.00133448	1.34187	0.247406	0.310937	0.0827877	0.16941	0.233261	-0.331887	0	0.0839706	0.0717014	0.0499135	0.0151481	0.732139	0.163131	0.0513757	0.53964	0.131834	-0.154941	0.0610154	-0.211192	0.0341021	0.037704	0	0.214914	0.0979524	0	0.290886	0.308222	0	0	-0.0256375	0.416054	0.0717014	0	0.13015	0
1043	pgaB	-0.0643066	-0.434801	-0.495769	-0.691878	-0.738193	-0.385891	-0.395541	-0.415037	-0.429835	-0.424885	0.493815	-0.554014	-0.618472	-0.395541	-0.581287	-1.21383	-1.44478	-0.376305	-0.390708	-0.415037	-0.449803	-0.570316	-0.701821	-0.713843	-0.820294	-0.511422	-0.719892	1.23704	-0.261563	-0.400391	-0.527247	-0.516678	-0.586804	-0.459892	-0.485427	-0.532561	0.243271	-0.470052	-0.485427	-0.490589	-0.556718	-0.390708	-0.464963	-0.434801	-0.660514
1044	pgaA	0.293015	1.00998	0.949016	0.752907	0.706592	1.05889	1.04924	1.02975	1.01495	1.0199	0.938599	0.890771	0.826313	1.04924	0.863498	1.23095	0	1.06848	1.05408	1.02975	0.994982	0.874469	0.742964	0.730942	0.624491	0.933363	0.724893	0.0968615	1.92019	1.04439	0.917538	0.928107	0.857981	0.984893	0.959358	0.912224	0.688056	13.8929	0.959358	0.954196	0.888067	1.05408	0.979822	1.00998	0.784271
1045	ycdT	0.180758	-1.88887	-0.949837	-2.14595	-1.19226	-1.83996	-1.84961	-0.869106	-1.8839	-1.87895	-1.96025	-2.00808	-0.0725402	-1.84961	-2.03536	-0.667899	0.101147	-1.83037	-1.84478	-1.86911	-1.90387	-2.02438	-1.15589	-2.16791	-2.27436	1.35644	-1.17396	-0.217029	-0.978666	-1.85446	-1.98132	-1.97075	-2.04087	-1.91396	-1.9395	-1.98663	-2.2108	-1.92412	-1.9395	-1.94466	-2.01079	-1.84478	-0.919031	-0.888869	-0.529619
1046	insF1	-0.128329	-2.35293	-2.16389	-1.52952	-1.49078	-2.05402	-2.31367	-2.08316	-2.34796	-2.34301	-1.92431	-2.22214	-2.2866	-1.81367	-1.10317	2.98502	-0.98275	-1.79443	-2.30883	-2.33316	-1.36793	-2.48844	-1.7237	-1.98573	-2.23842	-1.53331	-1.0008	-1.77173	-1.09921	-2.31852	-1.94537	-1.46425	-2.50493	-1.98178	-1.90355	-2.45069	-1.92485	-2.38818	-2.40355	-2.15871	-0.925301	-2.30883	-2.13309	-2.35293	-1.60808
1047	insE1	0	0	0	0	0	0	0	0	0	0	0	0	0	0	0	0	0	0	0	0	0	0	0	0	0	0	0	0	0	0	0	0	0	0	0	0	0	0	0	0	0	0	0	0	0
1048	ymdE	-0.371025	0	0	0	-0.492242	0	0	0	0	0	0	0	0	0	0	-0.136727	-0.70686	0	0	0	0	0	0	0	0	0	-0.963921	0	0	0	0	-0.297254	0	0	0	0	0	0	0	0	-0.876243	0	0	0	-0.297254
1049	ycdU	-0.560984	0	0	0	0	0	0	0	0	0	0	0	0	0	0	0	0	0	0	0	0	0	0	0	0	0	0	0.121526	1.04015	0	0	0	0	0	0	0	0	0	0	0.175404	0	0	0	0	0
1050	serX	-0.856897	3.22959	3.16862	2.97252	2.9262	3.2785	3.26885	3.24936	3.23456	3.23951	3.15821	3.11038	3.04592	3.26885	3.08311	2.45056	2.21961	3.28809	3.27369	3.24936	3.21459	3.09408	2.96257	2.95055	2.8441	3.15297	2.96736	2.79389	2.87666	3.264	3.13715	3.14772	3.07759	3.2045	3.17897	3.13183	2.90766	3.19434	3.17897	3.30486	3.25053	3.27369	3.19943	3.22959	3.00388
1051	ghrA	-1.08955	0	0	0	0	0	0	0	0	0	0	0	0	0	0	0	0	0	0	0	0	0	0	0	0	0	1.42496	0	0	0	0	0	0	0	0	0	0	0	0	0.731797	0	0	0	0	0
1052	ycdX	0.194173	1.02541	0.964444	0.768336	0.948444	1.07432	1.06467	1.04518	1.03038	1.03533	0.954028	0.906199	0.841741	1.06467	1.02178	1.13621	0.702193	1.08391	1.06951	1.04518	1.15327	2.18601	0.90125	0.74637	0.639919	0.948791	1.97772	0.48157	0.0665341	1.05982	0.932966	1.08639	1.24269	1.00032	0.974786	1.07051	0.989199	0.990162	0.974786	0.969625	0.903495	1.06951	0.99525	1.02541	0.7997
1053	ycdY	0.0357064	0	0	0	0	0	0	0	0	0	0	0	0	0	0	0	0	0	0	0	0	0.0396403	0	0	0	0	0	0	-0.144694	0	0	0	0	0	0	0	0	0	0	0	0	0	0	0	0
1054	ycdZ	0	0	0	0	0	0	0	0	0	0	0	0	0	0	0	0	0	0	0	0	0	0	0	0	0	0	0	0	0	0	0	0	0	0	0	0	0	0	0	0	0	0	0	0	0
1055	csgG	0.0942451	-0.975165	-0.925022	-0.774233	-0.723001	-0.102401	-0.935905	-1.06651	-0.856816	-1.07636	-1.15766	-0.872156	-0.695511	-1.04702	-0.846952	-0.89254	-0.830447	-1.02778	-1.04218	-1.06651	-1.10128	-1.22179	-0.937377	-1.18544	-1.01947	-1.1629	-0.741338	-0.890812	-0.698261	-0.940755	-0.891504	-1.05704	-1.01606	-0.93526	-0.491483	-1.07292	-0.839794	-1.12153	-0.57656	-0.772961	-1.20819	-1.04218	-0.82922	-0.910169	-0.716853
1056	csgF	0.149346	0	0	0	0	0	0	0	0	0	0	0	0	0	0	0	0	0	0	0	0	0	-0.165473	0	-0.0693931	0	-0.2979	0	-0.256852	0	0	0	0	0	-0.0912639	0	-0.159385	0	-0.208302	0	0	0	0	0	-0.169471
1057	csgE	0	0	0	-0.107424	0	-0.337353	0	0	-0.00408962	0	0	0	0	0	-0.0604739	0	0	0	0	0	0	0	0	-0.123788	0	0	0	0	-0.0117443	0	0	0	0	0	0	0	0	0	0	0	0	0	0	0	0
1058	csgD	0.031743	0.0302694	0	0	0.20154	0.0339222	0.0270902	0.0132876	0	0.00631574	0.057365	0	0.0602457	0.0270902	0	0.261133	0.0309113	0.0407088	0.0305119	0.0132876	0.179797	0.218341	0	0	0	0.440191	0	0	0	0.023657	0.098291	0.05689	0.0672256	0.322937	0.112576	0	0	0	0	0	0.0722813	0.189804	0.127248	0.251508	0
1059	csgB	0.257759	0.0895164	0.238125	0.243953	0.196057	0.219445	0.216072	0.209257	0.295952	0.205814	0.281756	0.170242	0.384755	0.216072	0.322528	0.427894	0.319119	0.222796	0.217761	0.209257	0.149657	0	0	0	0	0	0.190892	0.00933993	0	0.214377	0.157781	0.184485	0	0.176533	0.21285	0.0731516	0.278847	0.177282	0.308556	0.156745	0.150858	0.208912	0.224435	0.355003	0.235834
1060	csgA	0	0	0	0	0	0	0	0	0	0	0	0	0	0	0	0	0	0	0	0	0	0	-0.148906	-0.150305	-0.00742057	0	0	0	0	0	0	0	0	0	0	0	0	0	0	0	0	0	0	0	-0.0284406
1061	csgC	0	0.1676	0.0510744	0.0453192	0	0.0493551	0.0425658	0.0288494	0.108901	0.0219211	0	0	0	0.0425658	0	0	0	0.0560992	0.0459661	0.0288494	0	0.0795909	0	0	0	0.324247	0.00384105	0.0354479	0.291321	0.039154	0	0.231708	0	0	0	0.282341	0	0	0.121505	0	0	0.116763	0	0.0437063	0
1062	ymdA	0	-0.0629641	-0.0218084	0	-0.0119793	-0.0780408	-0.0862344	-0.102788	0	-0.111149	-0.0858378	-0.0712618	0	-0.0862344	0	0	-0.0121555	-0.0699017	-0.0821307	-0.102788	0	-0.140288	0	-0.102911	-0.560026	0	-0.463672	0	0	-0.10922	-0.0659845	0	0.302393	0	-0.162552	0	0.0245543	-0.149498	0	-0.166935	-0.128743	-0.00665904	-0.0508374	-0.0440961	0
1063	ymdB	-0.138782	0	0	0.0115829	0.250426	0	0	0	0	0	0	0	-0.00289092	0	0.250699	0.273218	0.106098	0	0	0	0.0829672	0	0.643554	0	0	0.807133	0	0.036841	0.134521	0	0.215098	0.0441706	0.592136	0.173	0	0	0	0	-0.0104388	0	0	0	0.0714191	0	0.0847455
1064	clsC	-0.00675712	-0.13589	-0.405089	-0.505559	0	-0.283965	-0.291976	-0.308162	-0.343516	-0.316337	-0.4027	-0.453443	-0.231286	-0.291976	-0.294969	0	-0.0168038	-0.276007	-0.287964	-0.308162	-0.363485	-0.45594	-0.500612	0.431582	0.157139	0	0	-0.603109	-0.39403	-0.192229	-0.127732	-0.23036	-0.100486	-0.273574	-0.366598	-0.0292501	-0.370411	-0.353834	-0.095977	-0.370883	-0.444651	-0.203058	-0.368477	-0.239663	-0.371351
1065	opgC	0.412356	0.80115	0.540182	0.541757	0.964665	0.65006	0.640409	0.620913	0.606116	0.611066	0.529765	0.881937	0.417479	0.640409	0.404524	0.918454	0.803931	0.659646	0.645243	0.620913	0.569554	0.465635	0.205419	0.349475	0.152801	1.37198	1.15004	0.597652	0.196506	0.63556	0.465684	0.510439	0.73072	0.541459	0.750524	0.820382	0.796214	0.565899	0.750524	0.545362	0.479233	0.645243	0.873697	0.80115	0.358488
1066	opgG	-0.571706	2.29727	2.2363	2.04019	1.99387	2.34618	2.33653	2.31703	2.30223	2.30718	2.22588	2.17805	2.1136	2.33653	2.15078	1.51824	1.28728	2.35576	2.34136	2.31703	2.28226	2.16175	2.03025	2.01822	1.91177	2.22064	2.01217	2.96911	1.88554	2.33168	2.20482	2.21539	2.14526	2.27218	2.24664	2.19951	1.97534	2.26202	2.24664	2.24148	2.17535	2.34136	2.2671	2.29727	2.07155
1067	opgH	0	0	0	0	0	0	0	0	0	0	0	0	0	0	0	0	0	0	0	0	0	0	0	0	0	0	0	0	0	0	0	0	0	0	0	0	0	0	0	0	0	0	0	0	0
1068	yceK	0	-0.392621	-0.288629	-0.427476	-0.372545	-0.303475	-0.273988	-0.317674	-0.324883	-0.322472	-0.352894	-0.385381	-0.314219	-0.2398	-0.202086	-0.433325	-0.40328	-0.298805	-0.271633	-0.317674	-0.0154672	0	-0.286449	-0.468888	-0.574936	-0.0996735	0	0	-0.151973	-0.310539	-0.235588	-0.00724007	-0.136398	-0.329658	-0.324398	-0.272365	0.0331457	0	-0.317778	0	-0.514903	-0.305821	-0.28781	-0.327302	-0.280514
1069	msyB	-0.125717	0	-0.131285	0	-0.254828	-0.11495	-0.095248	-0.132887	-0.141993	-0.138947	0	-0.218411	-0.181154	-0.069607	-0.337758	-0.419323	-0.454528	-0.109051	-0.0922738	-0.132887	-0.164923	0.145091	-0.181163	-0.0709987	-0.177147	-0.243482	-0.513698	-0.47042	-0.265287	-0.123873	-0.0993746	-0.321712	-0.289871	0	-0.00928588	-0.128286	0.148565	0	-0.150562	-0.459233	-0.0662286	-0.117915	-0.12297	-0.145049	-0.166386
1070	mdtG	-0.113888	0.337252	0.0993373	0.146828	0.1235	0.209085	0.202433	0.191606	0.178795	0.146495	0.419901	0.12192	0.0761836	0.202433	0.0104515	0.0235031	0	0.215693	0.205765	0.188995	0.192728	0.264169	0.0881129	0	0.132891	0.185206	0	0	-0.0207142	0.199091	0.176382	0.12024	0.129344	0.313263	0.491484	0.107986	0	0	0.0141128	0.10167	0.190552	0.205765	0.154581	0.175372	0.0498154
1071	lpxL	0.128521	0.457641	0.491695	0.459965	0.164208	0.506821	0.500724	0.407465	0.479055	0.589237	0.325069	0.510253	0.509995	0.500724	0.780795	0.460237	0.297062	0.512878	0.503777	0.488405	0.607843	0.449876	0.306515	0.638082	0.311976	0.485385	0.375749	0	-0.0138285	0.497659	0.410803	0.383713	0.558725	0.404197	0.317566	0.414147	0.332144	1.55279	0.776217	0.533357	0.323165	0.503777	0.456859	0.475917	0.40249
1072	yceA	0	0.650681	0.603767	0.424179	0.627125	0.529695	0.524202	0.886474	0.504683	0.400765	0.465141	0.541051	0.317678	0.524202	0.198681	0.0543276	0.110528	0.535152	0.526953	0.513105	0.453934	0.364563	1.19174	0.337627	0.205414	0.417049	0.459492	0.189254	0.1498	0.521442	0.70596	0.641937	0.816121	0.489644	0.477721	0.446212	0.44771	0	0.327957	0.429633	0.620452	0.526953	0.484688	0.501856	0.667116
1073	yceI	0	0	0.0257143	0	0	0	0	0	0	0.177479	0	0	0	0	0.0952111	0.104952	0	0	0	0	0.392194	0	0.0119901	0	0	0.00543861	0.00975911	-0.112062	0	0	0	0	0	0	0	0	0	0	0	0	0	0	0	0	0
1074	yceJ	-0.159003	0	0	0	-0.20693	0	0	0	0	0	0	0	-0.276472	0	0	0	-0.292619	0	0	-0.00775169	0	0	0	0	0	0	0	-0.0996958	0	0	0	0	-0.158113	-0.0441431	0	-0.0289282	-0.108378	0	0	0	0	0	0	0	0
1075	yceO	0	-0.187424	-0.0964598	-0.236653	0	-0.36758	-0.340086	-0.227767	-0.364919	-0.0940531	-0.512161	-0.15772	-0.0447892	-0.374568	-0.224535	0	0	-0.360639	-0.44394	-0.212407	0	-0.432164	-0.0621177	-0.436555	-0.803846	-0.416411	-0.238525	-0.127635	-0.284024	-0.343597	-0.274539	-0.163437	-0.147273	-0.143462	-0.281556	-0.00448779	0	-0.428524	-0.451152	-0.328453	-0.294791	-0.336586	-0.229437	-0.206506	-0.342676
1076	solA	0	0	0	-0.411591	0.0197951	0	0	0	0	0	0	0	0	0	0	0	-0.14831	0	0	0	-0.156314	0	-0.227058	0	0	0	-0.154634	0	0	0	0	0	0	0.0659035	0	-0.0390781	0	0	0	0	0	0	0	0	-0.0634429
1077	bssS	0.300274	-0.292603	-0.292339	0	-0.0476792	-0.253959	-0.207892	-0.362999	-0.227995	-0.377826	-0.0773499	-0.285934	-0.234857	-0.259616	-0.275026	-0.441452	-0.171474	-0.24834	-0.10193	-0.184921	-0.427429	-0.258622	-0.455616	-0.429285	0	-0.166946	-0.49087	-0.13062	0	-0.210735	-0.377053	-0.215685	-0.226877	-0.0444892	-0.0751543	-0.276872	-0.132998	-0.303294	-0.162882	-0.309586	-0.323523	-0.205059	-0.340541	-0.252054	-0.245959
1078	dinI	0.183408	0	0	0	-0.160135	0	0	0	0	0	0	0	0	0	0	0.00694405	0.0045293	0	0	0	0	0	0	0	0.278601	0	0	0.11419	0	0	0	0.0397155	0.248413	0	0	0	0	0	0	0	0	0	0	0	0
1079	pyrC	0.289494	0	0	0.0348352	0	0	0	0	0	0	0.0210315	0	0	0	0	0.154301	0.501501	0	0.124934	0	0	0.544302	0.0875065	0.347626	0	0	0	0	0	0	0	0.962424	1.32057	0	0	0.0657698	0.367247	0	0	0	0	0	0	0.103648	0
1080	yceB	0.0886511	0.650513	0.660974	0.595281	0.347121	0.699423	0.689773	0.670276	0.655479	0.660429	0.714474	0.602729	0.538271	0.689773	0.504027	0.289449	0	0.709009	0.649986	0.670276	0.635511	0.846144	0.495098	0.972119	0.514029	0.909638	0.508279	0.413906	0.541669	0.643602	0.772353	1.14563	0.846558	0.696851	0.742744	0.600693	0.310637	0.686691	0.599887	0.594725	0.600024	0.694606	0.69178	0.613496	0.678715
1081	grxB	0	0	0	0	-0.0326374	0	0	0	0	0	0	0	0	0	0	-0.0965568	0	0	0	0	0	-0.0304938	-0.161999	0	0	0	0	0	0.200943	0	0	0	0.371425	0	0	0	0	0	0	0	0	0	0	0	0
1082	mdtH	0.0320369	-0.00471565	0	-0.0617926	0	0	0	0	0	0	0	0	0	0	-0.151202	-0.725811	-0.233322	0	0	0	-0.0197178	0	0	-0.283758	-0.390209	0	-0.289807	0	0	0.289246	0	0	0	-0.0298066	0	-0.102476	-0.326644	-0.0399665	-0.0553417	-0.0605034	-0.126633	0	0	-0.00471565	0.015078
1083	rimJ	-0.43806	0.320365	2.0329	0.226106	0.463042	0.352139	0.296255	0.332804	0.583869	0.330134	0.275165	0.27524	0.441376	0.348892	0.23189	-0.294271	0.0124739	0.562475	0.351983	0.35406	0.313823	0.582089	0.708077	0.0865378	0	0.267713	1.30699	0.0605855	0	0.363337	0.29158	0.402433	0.155817	0.305601	0.0557565	0.27725	0.175356	0.701504	0.287967	0.277661	0.624195	0.351983	0.304496	0.24188	0
1084	yceH	-0.233948	0	0	0	0.295974	0	0	0	0.256394	0	0	0.31518	0	0	0	0	0.219147	0	0	0	0	0	0	0	0	0	0	0.0935407	0	0	0	0	0	0	0.184538	0	0.1472	0	0	0.581573	0	0	0	0.0262945	0
1085	yceM	0	0.328788	1.33793	0.336485	0	0.363059	0.455527	0.343437	0.0510556	0.329082	0.276419	0.321978	0.386091	0.350252	0.212765	0.307111	0	0.294893	0.353737	0.300925	0.311867	0.0626307	0.0193238	0.238358	0.400261	0.280849	0.774919	0.394522	0.411908	0.311664	0.201465	0.334232	0.353877	0.308135	0.449189	0.219498	0.0629508	0.162674	0.292331	0	0.338948	0.353737	0.300201	0.441933	0.602248
1086	murJ	-0.0219585	0.100188	0	0	0.232047	0.136615	0.385205	0.108903	1.05921	0.15748	0.0646477	0.0176748	0.153351	0.174766	0.0914415	0	0.287431	0.205378	0.177631	0.427738	0.137082	0.490798	0.319052	0.104161	0.855482	0	0.52799	-0.13217	0	0.435078	0.500435	0.0680999	0	0.104541	0.0630017	0.333304	0	0.134536	0.0698577	1.28538	0	0.177631	0.133616	0.133273	0.153692
1087	flgN	0	0	0	0	0	0	0	0	0	0	0	0	0	0	0	0	-0.0174567	0	0	0	0	0	0	0	0	0	0	0	0	0	0	0	0	0	0	0	0	0	0	0	0	0	0	0	0
1088	flgM	0	0	0	0	0	0	0	0	0	0	0	0	0	0	0	0	0	0	0	0	0	0	0	0	0.888847	0	0	0.129166	0	0	0	0	0	0	0	0	0	0	0	0	0.120943	0	0	0	0
1089	flgA	-0.076084	0.809307	0.633551	0.605551	0.397093	0.824968	0.699541	0.838854	0.730267	0.619511	0.7183	0.669319	0.80467	0.646571	0.374373	0.342052	0.256079	0.656428	0.65096	0.606023	0.618644	0.55593	0.175238	0.767679	0	0.966086	0.0965656	0.386121	0.982011	0.624511	0.55082	0.60471	0.577844	0.712184	0.635148	0.595094	0.634071	0.697028	0.764582	0.566477	0.639617	0.65096	0.583534	0.563822	0.418983
1090	flgB	-0.220275	0	0	0	0.463973	0	0	0	0	0	0.030772	0	0	0	0	0	0	0	0	0	0	0	0	0	0	0.0370033	0.339201	0	0.660694	0	0	0	0	0	0	0	0	0	0	0.36507	0	0	0	0	0.263546
1091	flgC	-0.199431	0	0	0.0388562	0	0	0	0	0	0	0	0	0	0	0.225088	0.0400058	0.123492	0	0	0	0.165613	0.113363	0.730575	0	0	0.0993303	0	0	0.208294	0	0	0	0	0.00815508	0	0.146645	0	0	0	0	0	0	0	0.0727476	0
1092	flgD	-0.0196157	0.749435	0.571443	0.622396	0.267201	0.796704	0.6998	0.763891	1.05052	0.687822	0.71005	0.728539	0.595727	0.704791	0.608935	0.487839	0.429259	0.814868	0.708594	0.767592	0.525723	0.464734	0	0.769219	0.449568	0.396912	0.665984	0.617064	0.387354	0.702639	0.839797	0.622333	0.626488	0.735862	0.639615	0.650023	0.649249	0.870508	0.691249	0.44846	0.873005	0.708594	0.650172	0.598412	0.58751
1093	flgE	0	0.823546	1.05505	0.535361	0.657387	0.824738	0.867346	0.837961	1.18785	0.811849	0.569961	0.852791	0.661066	0.86638	0.787671	0.408705	0.154173	0.861829	0.869854	0.934019	0.82152	0.76062	1.00748	0.493294	0.605309	1.66761	0.736291	0.26138	0.583729	0.862573	1.03231	0.674578	0.779468	0.772061	0.736191	1.07231	0.69158	0.0199047	0.887488	0.83321	0.790217	0.869854	0.816488	0.94955	0.906169
1094	flgF	0	0	0	0	0.308038	0	0	0	0	0	0.157901	0	0	0	0	0	0.17011	0	0	0	0	0	0	0	0.113485	0.641476	0	0	0	0	0	0	0	0	0	0	0	2.5639	0	0	0	0	0	0	0
1095	flgG	-0.0105482	0.241442	0.103306	1.03958	0.236738	0.456621	0.266102	0.256401	0.124975	0.421924	0.651322	0.445814	0.278598	0.266424	0.273581	0	0.507811	0.287177	0.270099	0.224381	0.393782	0.126903	0.311551	0.503311	0.167457	0	1.19024	0.136703	0.0354711	0.262843	0.0794096	0.737542	0.770799	0.40018	0.553268	0.227426	0.296836	0	0.169502	0.182433	0.630635	0.270099	0.213633	0.199441	0
1096	flgH	0.0684118	0	0	0	0	0	0	0	0	0	0	0	0	0	0	-0.538458	0	0	0	0	0	0	0.398104	0	-0.099686	0	0	0.198654	-0.0306214	0	0	0	0	0	0	0	0	0	0	0	0	0	0	0	-0.030315
1097	flgI	0.00482455	0.275877	0.437132	0.241023	0.259703	0.324787	0.315137	0.295641	0.456951	0.396904	0.3806	0.156664	0.314429	0.315137	0.240502	0	0	0.334373	0.31997	0.295641	0.483097	0.140362	0.586414	0.983115	0.803625	0	0	0.426528	0.0402595	0.310287	0.359538	0.527334	0.234985	0.250786	0.336362	0.289228	0	0.240627	0.225251	0.22009	0.265071	0.31997	0.245715	0.275877	0.161276
1098	flgJ	0.043537	-0.206566	0	-0.309797	-0.157269	-0.157656	-0.167306	-0.186803	-0.0796794	-0.19665	-0.00218409	-0.248856	-0.236391	-0.167306	-0.199206	-0.364294	-0.222334	-0.14807	-0.162473	-0.186803	-0.0677218	-0.111312	0	0	0	0.756706	-0.198784	0	-0.493407	-0.172156	-0.0232457	-0.0126765	-0.204723	-0.154734	0	-0.105483	-0.528494	-0.241817	0	-0.262354	-0.174637	-0.162473	-0.0828816	-0.206566	-0.228771
1099	flgK	-0.0689637	0.94952	0.999663	0.803554	0.646128	0.99843	0.98878	0.969283	0.954486	0.959436	0.878136	0.830307	0.765849	0.98878	0.803034	0.281602	0.226754	1.00802	0.993613	0.969283	1.11062	0.925116	1.47692	0.781589	0.675138	0.620664	0.664429	0.434727	0.112232	0.98393	0.857074	0.867643	0.797517	0.924429	0.898894	0.85176	0.803699	0.914269	1.01001	0.893732	0.938714	0.993613	1.03047	1.06063	1.01103
1100	flgL	0.0109186	-0.457568	-0.19263	-0.623736	-0.616872	-0.499567	-0.418308	-0.384626	-0.543511	-0.447652	-0.384865	-0.576781	-0.459421	-0.509217	-0.513145	-0.637964	-0.657834	-0.489981	-0.504384	-0.528714	-0.563479	-0.593083	-0.45186	-0.0555324	-0.258855	-0.299192	-0.262168	-0.574791	-0.36305	-0.423158	-0.186378	-0.448536	-0.336844	-0.482659	-0.508194	-0.646237	-0.688587	-0.583728	-0.417285	-0.604265	-0.526307	-0.504384	-0.578639	-0.548477	-0.68328
1101	rne	-0.346434	0.0200378	-0.0409303	-0.237039	-0.283354	0.0689474	0.0592972	0.039801	0.025004	0.0299532	-0.0513469	-0.0991754	-0.163633	0.0592972	0.873552	-0.758992	0.0100537	0.0785334	0.0641303	0.039801	0.00503559	-0.115477	-0.246982	-0.259005	-0.365455	-0.0565835	-0.265054	-0.893085	-1.39169	0.0544478	-0.0724085	-0.0618393	-0.131965	-0.00505323	-0.0305883	-0.0777223	0.69811	-0.0152131	-0.0305883	-0.03575	-0.10188	0.0641303	-0.0101242	0.0200378	-0.205675
1102	yceQ	0	1.68056	1.6196	1.41977	1.35693	1.72947	1.71982	1.70033	1.68553	1.69048	1.60918	1.70421	1.49689	1.86268	1.81437	1.5386	1.16478	1.73906	1.72466	1.70033	1.66556	1.54505	1.5564	1.54438	1.29507	1.60394	1.55905	0.991057	0.6163	1.71497	1.81454	1.59869	1.52856	1.65547	1.62994	1.5828	1.8332	1.64531	1.62994	1.62478	2.27892	1.72466	1.6504	1.68056	1.42598
1103	rluC	-0.183647	0	0	0	0	0	0	0	0	0	0	0	0	0	0	0	0	0	0	0	0	0	0	0	0	0	0	0	0	0	0	0	0	0	0	0	0	0	0	0	0.0218418	0	0	0	0
1104	yceF	0.383746	0	0	0.0260394	0.141673	0	0	0	0	0	0	0	0	0	0.0379805	0	-0.0414438	0	0	0	0	0	-0.128962	0	0	0	0.439927	1.01965	0.152741	0	0	0	0	0	0	0	0	0	0	0	0	0	0	0	0.202091
1105	psrD	0	0	0	0	0	0	0	0	0	0	0	0	0	0	0	0	0	0	0	0	0	0	0	0	0	0	0	0	0	0	0	0	0	0	0	0	0	0	0	0	0	0	0	0	0
1106	yceD	0	0	0	0	0	0	0	0	0	0	0	0	0	0	0	0	0	0	0	0	0	0	0	0	0	0	0	0	0	0	0	0	0	0	0	0	0	0	0	0	0	0	0	0	0
1107	rpmF	0.321367	-0.241268	0.0310975	0.168322	-0.0163392	-0.192358	-0.202008	-0.221505	-0.236302	-0.231352	-0.312652	0.501173	-0.424939	-0.202008	-0.387754	-0.491977	-0.389598	0.150561	-0.197175	-0.221505	-0.25627	-0.376783	0.0200332	-0.52031	-0.626761	-0.317889	-0.193026	-0.487724	-0.319659	-0.206858	-0.00038077	-0.323145	-0.393271	-0.266359	-0.291894	-0.339028	-0.563196	-0.276519	-0.291894	-0.297056	-0.363185	-0.197175	-0.27143	-0.241268	0.199686
1108	plsX	0	0	0	0	0	0	0	0	0	0	0	0	0	0	0	0	0	0	0	0	0	0	0	0	0	0	0	0	0	0	0	0	0	0	0	0	0	0	0	0	0	0	0	0	0
1109	fabH	0	0.392692	0.331724	0.663936	0.950954	0.441601	0.431951	0.412455	0.397658	0.402607	0.321307	0.273479	0.209021	0.431951	0.246206	0	0	0.451187	0.436784	0.412455	0.37769	0.257177	0.459005	0.11365	0	0.316071	0.107601	-0.0772463	-0.303884	0.427102	0.300246	0.310815	0.907355	0.367601	0.342066	0.294932	0.0707637	1.72053	0.342066	0.336904	0.270774	0.436784	0.36253	0.392692	0.166979
1110	fabD	0.264902	0	0	0	0	0	0	0	0	0	0	0	-0.0868837	0	-0.0496988	-0.161582	-0.384876	0	0	0	0	-0.0387277	0	-0.182255	0.988226	0	0	-0.664777	-1.07272	0	0	0	0	0	0	-0.000972748	-0.104481	0.832814	0	0	-0.0251301	0	0	0	-0.128925
1111	fabG	0.421061	-0.101562	0.33747	0.433842	0.387527	1.53231	-0.062303	-0.0817991	-0.0965961	-0.0916469	-0.172947	0.279224	-0.19835	-0.062303	-0.19835	0.119408	-0.726671	-0.0430667	-0.0574698	-0.0817991	-0.116565	-0.19835	-0.368582	-0.19835	0	-0.178184	0.405828	0	0	-0.0671524	-0.194009	-0.183439	-0.253565	-0.126653	-0.152188	-0.19835	0.0765095	4.44761	-0.152188	0.34265	-0.19835	-0.0574698	-0.131724	-0.101562	-0.19835
1112	acpP	0	0	0	0	0	0	0	0	0	0	0	0	0	0	0	0	0	0	0	0	0	0	0	0	0	0	0	0	0	0	0	0	0	0	0	0	0	0	0	0	0	0	0	0	0
1113	fabF	0.160468	0.316529	1.21258	0.689547	1.51843	0.529877	0.550137	0.480783	0.481614	0.438633	0.765785	0.822445	0.814867	0.488907	0.943915	0.986272	0.663584	0.502368	0.322417	0.445524	0.450936	0.59413	0.774579	0.712808	2.0237	0.407816	1.03124	0.406686	0.211075	0.283358	0.676703	0.232474	0.678087	0.443876	0.637376	0.697108	0.432963	0.423521	0.770743	0.726479	1.73926	0.688206	1.24441	0.461434	0.337702
1114	pabC	0	0.714078	0.461005	0.246369	0.288456	0.385202	0.325382	0.425097	0.393841	0.489701	0.672796	0.2563	0.142542	0.447841	0.166333	0.109013	0	0.459391	0.790487	0.495614	0.41526	0.680328	0.263938	0.155917	0	0.378261	0.299444	0	0.1865	0.849241	0.601319	0.718435	0.479438	0.409202	0.471132	0.257401	0.337354	0.429592	0.496879	0.282602	0.601884	0.55891	0.297989	0.424268	0.220308
1115	yceG	-0.440505	0.715842	1.04295	1.13042	0.858073	1.22535	1.39657	1.14731	1.08104	0.937401	0.76157	0.956213	1.14432	1.10517	1.00933	0.623766	0.599942	1.10964	0	0.93969	1.09256	1.09652	1.03398	1.30916	0.245249	1.07823	0.862326	0.861832	0.483474	0.00150232	0.0578498	0	1.2075	1.09021	1.04328	1.13072	1.33905	1.03298	1.11125	1.14047	1.14563	1.04889	1.14643	1.09604	1.16153
1116	tmk	-0.0966182	0.696052	0.267348	0.180721	0.306131	0.385321	0.182347	0.234357	0.546702	0.427214	0.449637	0.333057	0.12899	0.3218	0.369623	0	0	0.335267	1.60559	0.434108	0.283812	0.456388	0.107376	0.0773585	1.18451	0.240673	0.318943	0.423056	0	1.20014	1.09187	1.40805	0.0764209	0.276749	0.418285	0.202695	0.562086	0.275312	0.352374	0.232079	0.447349	0.348363	0.25002	0.294315	0.193059
1117	holB	-0.0297394	0.10773	0.334528	0.229639	0.159135	0.273929	0.809274	0.451215	0.667629	0.700738	0.773163	0.782354	0.327494	0.351429	0.189736	0.6036	0.2736	0.354098	3.2454	0.702104	0.3439	0.102388	0.308931	0.515459	0	0.33535	0.161674	0	0.431918	2.66769	2.59547	2.92842	0.380138	0.3425	0.478661	0.336832	0.0655441	0.66654	0.25312	0.342656	0.10781	0.347685	0.346212	0.345982	0.235823
1118	ycfH	0.247552	2.04682	1.89015	1.79528	1.78029	2.02492	1.62759	2.08413	1.63374	1.6361	1.49237	1.46051	1.80075	1.96597	1.90002	1.3273	1.36034	1.98038	0	1.64347	1.92533	1.96351	1.73658	1.56533	1.64982	1.87918	1.794	1.27448	0.714957	0	0	0	1.80082	1.91777	1.755	1.86445	1.78543	1.84867	1.94862	1.89589	1.97458	1.96849	1.91508	1.93657	1.81923
1119	ptsG	0	0	0	0	0	0	0	0	0	0	0	0	0	0	0	0	0	0	0	0	0	0	0	0	0	0	0	0	0	0	0	0	0	0	0	0	0	0	0	0	0	0	0	0	0
1120	fhuE	-1.26805	2.37715	2.30214	2.09568	2.3767	2.43165	2.42812	2.62173	2.36087	2.40076	2.27982	2.49433	2.26503	2.40043	2.25145	1.69576	1.46481	2.43923	2.43234	2.3928	2.38107	2.27009	2.14739	2.32498	2.0893	2.30556	2.1897	1.47475	1.56307	2.31429	2.14662	2.30661	2.19853	2.32129	2.3169	2.30019	2.08654	2.38536	2.3625	2.33821	2.27146	2.42783	2.35259	2.40068	2.24908
1121	hinT	-0.206938	0.390554	0.446743	0.488138	0.178811	0.368224	0.343743	0.491318	0.475572	0.335776	0.494362	0.444991	0.104354	0.454473	0.307438	0	0	0.376231	0.346199	0.407023	0.31489	0.276737	0.241547	0.483076	0	0.370458	0	0.347677	0	0.779658	0.942921	0.345228	0.497026	0.513639	0.429086	0.30737	0.265298	0.216747	0.246675	0.323182	0.325669	0.364222	0.368168	0.296455	0
1122	ycfL	0	0	0	0	0	0	0	0	0	0	0	0	0.214584	0	0	-0.0146515	-0.23561	0	0	0	0	0	0	0	0	0	0	0	-0.178095	0	0	0.0258556	0	0	0	0	0	0.03851	0	0	0	0	0	0	0
1123	lpoB	0	0	0	0	0	0	0	0	0	0	0	0	0	0	0.00904284	0	0	0	0	0	0	0	0	0	0.617767	0	0	0	0	0.475908	0.507287	0	0	0	0	0	0	0	0	0	0.0140665	0	0	0.181265	1.21344
1124	thiK	-0.128277	0.222898	0.250679	0.168631	0.37037	0.275092	0.360307	0.210687	0.30302	0.248291	0.12424	0.199822	0.506544	0.603721	0.208892	0.0734622	0.0966359	0.281512	0.372375	0.23635	0.232007	0.135628	0.630747	0.191398	1.90817	0.259787	1.04133	0.0564124	0.588411	0	0	0.251964	0.151076	0.263506	0.266075	0.360941	0.0669448	0.492267	0.422882	0.496508	0.221389	0.271745	0.187024	0.144065	0
1125	nagZ	0.0656336	0	0	0.0871388	0	0	0	0	0	0	0	0	0	0	0	0	-0.0922991	0	0	0	0	0	1.00739	0.305724	0.305472	0	0	0.537949	0.19712	0.110084	0.255774	0	0	0	0	0	0	0	0	0	0	0	0	0	0
1126	ycfP	0	1.31237	1.25631	1.05364	1.02392	1.34651	1.4713	1.32982	1.30575	1.32193	1.27368	1.18768	1.22443	1.28994	1.18265	0.773053	0.5537	1.35415	1.39159	1.32607	1.29824	1.17137	0.69768	0.894964	1.65364	1.23755	1.09262	0.823749	0.91318	1.26142	1.04204	1.2355	1.19113	1.28613	1.25874	1.20389	1.02838	1.21851	1.2379	1.22051	1.21853	1.34382	1.43665	1.29541	0.967165
1127	ndh	-0.772048	1.58771	1.5256	1.39212	1.33568	1.63891	1.61262	1.61614	1.58869	1.56482	1.45752	1.64911	1.63397	1.63872	1.4753	1.05916	0.95478	1.64609	1.19235	1.61668	1.57248	1.7134	1.59139	1.67059	1.20572	1.53819	1.3119	0.753807	0.128065	1.60195	1.78122	1.52362	1.44416	1.55518	1.56558	1.52474	1.47807	1.72859	1.55462	1.56663	1.37858	1.62738	1.5425	1.60403	1.43361
1128	ycfJ	0	0	0	0	0	0	0	0	0	0.293558	0.370316	0.506995	0	0	0	0.128969	0	0	0.808572	0	0	0	0	0	0.23295	0	0	0	0.390942	0	0	0	0	0	0	0	0	0	0	0	0.186713	0	0	0	0
1129	ycfQ	0.00121682	0.611246	0.724638	0.354169	0.507854	0.610407	0.602141	0.582459	0.616212	0	0	0	0.139018	0.600767	0.46476	0.0596279	0.201262	0.619615	0	0.582431	0.596244	0.558113	0.380398	0.532204	0.595964	0.534625	0.326155	0.594682	0	0.645656	0.514193	0.529369	0.722633	0.586155	0.514731	0.513486	0.458561	0.521527	0.56062	0.509514	0.302616	0.655338	0.641673	0.563333	0.504485
1130	bhsA	0.127791	0.0493532	0	0.134753	0.0816408	0	0	0	0.0789289	0	0	0	0	0	0.0870281	0	0.163585	0	1.23185	0	0.0800867	0	0	0.0123143	0	0.0111076	0.489243	0	0.222404	0.207078	0	0.0835764	0	0.152751	0	0.012068	0	0	0.051717	0	0.502145	0.00473624	0	0	0
1131	ldtC	0.350826	0	0.00839107	0	0	0	0	0	0	2.81566	2.60863	2.25167	2.18077	0	0	-0.562433	0	0	0	0	0	0	-0.0504228	0.481005	-0.168896	0	-0.0684944	0	-0.364646	0	0	0	0	0	0	0	0	0	0	0	0	0	0	0	-0.00911586
1132	mfd	0.0255351	1.02004	0.95907	1.76296	0.716646	1.06895	1.0593	8.51553	1.025	1.02995	0.948653	0.900825	0.836367	1.0593	0.873552	0.241008	0.0100537	1.07853	1.06413	1.0398	1.00504	0.884523	0.753018	2.32596	0.634545	0.943416	0.734946	0.106915	-0.391687	1.05445	0.927592	0.938161	0.868035	0.994947	0.969412	0.922278	0.69811	0.984787	0.969412	2.54921	1.89812	1.06413	0.989876	1.02004	0.794325
1133	ycfT	-0.0651114	0.758741	0.697773	0.501665	0.788683	0.807651	0.798001	0.778505	0.763708	0.768657	0.687357	0.639528	0.741737	0.798001	0.612255	0.243872	0.679584	0.817237	0.802834	0.778505	0.743739	0.623227	0.991722	0.479699	0.373248	0.848787	0.47365	0.443113	0.277844	0.793152	0.666295	0.676864	0.940072	0.733651	0.874782	0.660981	0.436813	0.890157	0.708115	0.702954	0.636824	0.802834	0.72858	0.758741	0.699695
1134	lolC	0.388672	0.665187	0.655416	1.03286	0.402474	0.699545	0.651444	0.67907	0.668676	0.672153	0.615041	0.666896	0.527898	0.692766	0.78732	1.03283	0	0.706279	0.729219	1.21626	0.654648	0.636106	0.455627	0.587677	1.67134	0.611362	0.456652	1.14851	0	0.689359	0.474091	0.343207	0.550144	0.606239	0.629623	0.472546	0.472097	5.8268	0.546979	0.584675	0.612601	0.696161	0.643999	0.547297	0.506629
1135	lolD	-0.00912263	0	0	0	0	0	0	0	0	0	0	0	0	0	0	-0.312083	-0.366158	0	0	0	0	0	0	-0.010216	0	0	-0.016265	0	0.178903	0	0	0	0	0	0	0	0	0	0	0	0	0	0	0	0
1136	lolE	0	0.783297	0.680903	0.533799	0.70194	0.8124	0.889303	0.795057	0.786252	0.789197	0.74082	0.541454	0.690534	0.806658	0.246059	0.0749153	0.32887	0.818104	0.743418	0.720677	0.77437	0.570429	0.668379	0.380233	0	0.737704	0.630185	0.575364	0	0.803773	0.980596	1.2635	0.709378	0.851012	0.753173	0.97306	0.525621	0.044208	0.918462	0.832746	0.644636	0.809534	0.76535	1.01908	0.648989
1137	nagK	0.345695	0.387091	0.482743	0.52812	0.453191	0.423066	0.490348	0.401627	0.390744	0.394384	0.334585	0.662582	0.46687	0.415968	1.23575	0.386223	0.199626	0.430117	0.560018	0.434685	0.376056	0.568406	0.347253	0.685517	1.41925	0.330733	0.392272	0.0758232	0.10511	0.412401	0.429178	0.2029	0.490163	0.443016	0.349854	0.538325	0.290797	0.680324	0.498614	0.420437	0.437912	0.419523	0.364906	0.2823	0.221071
1138	cobB	0.0401941	-0.184564	-0.245532	-0.118521	-0.0398358	-0.135654	-0.0203045	-0.164801	-0.179598	-0.174648	-0.255949	-0.105657	-0.243235	-0.0203045	0	0	-0.161554	-0.126068	-0.140471	-0.0398007	-0.199566	-0.195079	-0.451584	-0.0154859	0	-0.261185	0	-0.524566	-0.450048	-0.0251539	-0.27701	-0.0164409	-0.0134467	-0.0846549	-0.23519	-0.157324	-0.381492	-0.219815	-0.11019	-0.240352	-0.306481	-0.140471	-0.214726	-0.0595639	-0.212156
1139	ycfZ	0	0	0	0	0.00686071	0	0	0	0	0	0	0	0	0	0	-0.302613	-0.0527911	0	0	0	0	0	0	0	0	0	0.152429	0	0.0519761	0.049225	0	0.174575	0	0	0	0	0	0	0	0	0	0	0	0.0291057	0
1140	ymfA	0.0366221	0	0	0	0	0	0	0	0	0	0.0575321	0.8921	0.0197048	0	0	0	0	0	0.226771	0.0492844	0	0	0.87033	0	0	0.0657097	0	0	0	0.0164736	0	0.144156	0.0614551	0	0	0	0	0	0	0	0	0	0	0.028131	0.00632598
1141	potD	0.190598	0.939554	0.933324	1.1595	0.777842	0.962378	0.957875	0.948777	0.991763	0.877514	0.586056	0.0573838	0.861613	0.957875	0.960083	0.526437	0.488779	0.900185	0	0.701307	0.932553	0.809647	0.171009	0.850317	0.743866	0.120832	1.28596	0.422472	0.245055	1.07502	0.985301	0.865839	0.964438	0.927845	0.743598	0.743824	0.689104	0.923104	0.915928	0.91352	0.815993	0.96013	0.925478	0.926917	0.788318
1142	potC	0.0827769	0.118042	0.202601	0	0.067615	0.157169	0.149449	0.133852	0.213844	0.225974	0.48368	0.370377	0.106409	0.149449	0.0341862	0	0.140882	0.264838	1.44074	0.455773	0.10604	0.10963	0	0	0	1.16548	0	0.341796	0.0358734	0.0838321	0.0774181	0.0119273	0.0554169	0.097969	0.336037	0.431663	0.344158	0.0898411	0.0775409	0.0734115	0.120508	0.153316	0.0939122	0.256129	0
1143	potB	0	-0.309254	-0.568343	-0.514452	-0.487646	-0.458465	-0.468115	-0.487611	-0.304288	-0.372459	-0.255639	-0.105347	-0.566046	-0.343115	-0.528861	-0.390164	-0.547998	-0.323879	0.677851	-0.0913708	-0.522377	-0.51789	1.1435	0.633826	0.343984	0.174097	-0.792466	-0.307136	-0.640497	-0.472965	-0.474821	-0.464252	-0.461257	-0.407466	-0.433001	-0.157014	-0.381182	-0.417625	-0.558001	-0.438162	-0.504292	-0.463282	-0.537537	-0.132375	-0.534967
1144	potA	0.43028	1.98054	1.91957	1.72346	1.67715	2.02945	2.0198	2.0003	1.9855	1.99045	1.90915	1.86132	1.79687	2.0198	1.83405	1.70151	0.970553	2.03903	2.02463	2.0003	1.96554	1.84502	1.71352	1.70149	1.59504	1.90392	1.69545	1.06741	1.06881	2.01495	1.88809	1.89866	1.82853	1.95545	1.92991	1.88278	1.65861	1.94529	1.92991	1.92475	1.85862	2.02463	1.95038	1.98054	1.75482
1145	pepT	0.15396	0.542029	0.639078	0.301964	0.432759	0.583654	0.575441	0.558849	0.546256	0.550468	0.566383	0.440571	0.555926	0.575441	0.41736	0.606461	-0.16658	0.591813	0.579555	0.558849	0.529261	0.59691	0.259779	0.453483	0.577668	0.47682	0.820361	0.094836	0.0270608	0.550038	0.463351	0.472347	0.582878	0.499399	0.498943	0.437552	0.204218	0.660965	0.669156	0.664763	0.43827	0.579555	0.665296	0.520753	0.76865
1146	roxA	0.456901	0.210614	0.262515	0.108545	0.0458804	0.25432	0.245697	0.228275	0.215052	0.219474	0.636185	0.104083	0.0252056	0.245697	0.0797113	0.319771	-0.0126739	0.262886	0.250016	0.228275	0.197208	0.0682387	0.301996	0.0676398	0.268786	0.142144	-0.0067239	-0.134755	-0.174304	0.369023	0.128002	0.137447	0.0535046	0.315852	0.165373	0.250913	0.305912	0.285496	0.144097	0.139484	0.101666	0.250016	0.290044	0.338273	0.0815734
1147	phoQ	0.222052	0	0	2.26394	0	0.0258783	0.124741	0	0	0.0275198	0	0	0	0	0	0.153504	0	0.033089	0	0.0968012	0	0	0	0	0	0.0770412	0	0.539545	0	0	0.256178	0	0	0	0	0	0.127807	0	0	0	0	0	0	0	0
1148	phoP	0.379193	1.54414	1.31219	0	1.24012	1.39524	1.30408	1.38898	1.3749	1.46655	1.30228	1.36654	1.39382	1.40752	1.53617	0.897026	1.23748	1.39838	1.41212	1.33309	1.35591	1.19249	1.11618	1.2145	1.11325	1.74931	1.13558	0.170699	0.655726	1.40291	1.24376	1.26791	1.29669	1.34631	1.32202	1.45115	1.21729	1.33665	1.32202	2.12173	1.36397	1.41212	1.34149	1.37018	1.44898
1149	purB	0.0978196	0.736268	0.798713	0.748069	0.446902	0.829299	0.841413	0.818403	0.814794	0.771248	0.796172	0.735726	0.569519	0.823158	1.1549	0.670185	0.0881269	0.832692	0.824337	0.710618	0.809924	1.02443	0.748456	0.696743	0.67078	0.576879	1.06112	1.08719	0.41219	0.821976	0.751209	0.915564	0.921017	0.807463	0.801235	0.712424	0.749623	0.804985	0.801235	0.44237	0.735066	0.824337	0.806226	0.813583	0.451978
1150	hflD	0.170066	0.378987	0.286796	0.116009	0.553611	0.38138	0.365673	0.357682	0.34469	0.371412	0.27765	0.260044	0.445357	0.374801	0.189851	0	0.193073	0.38927	0.379044	0.578241	0.327156	0.432722	0.105873	0.119707	0.0262374	0.382059	0.431468	0.522454	0.852609	0.370543	0.27907	0.374128	0.732103	0.318298	0.295877	0.293149	0.217048	0.309377	0.295877	0.470147	0.25767	0.379044	0.313845	0.340329	0.559579
1151	mnmA	0.0971402	0.495433	0.766789	0.480295	0.776121	0.49837	0.425255	0.49662	0.495731	0.496029	0.43821	0.481175	0.431469	0.49779	0.263914	0.0735963	0	0.498945	0.498081	0.49662	0.494533	0.487297	0.262641	0.469764	0	0	0.464114	0	0	0.497499	0.489883	0.430479	0.486307	0.493927	0.492394	0.478309	0.344407	0.493317	0.492394	0.7671	0.514268	0.498081	0.493622	0.495433	0.316943
1152	nudJ	0.00632961	1.39329	1.23085	1.42135	1.21706	1.43971	1.60199	1.41205	1.398	1.4027	1.35976	1.29694	1.2532	1.43055	1.50799	1.35869	1.38817	1.4488	1.43513	1.41205	1.37905	1.26469	1.47041	1.14955	1.96492	1.91266	1.15631	1.04029	1.10798	1.42595	1.30556	1.36659	1.24904	1.36948	1.34525	1.32712	1.48998	1.35984	1.34525	1.23576	1.4885	1.43513	1.36467	1.39329	1.38713
1153	rluE	0.071559	1.06558	1.21617	0.71558	1.02635	1.06337	0.569245	1.06469	1.06536	1.06513	1.16241	1.02255	1.16749	1.06381	0.917261	0.452613	0.342296	1.06294	1.06359	1.06469	1.06626	1.0717	0.508826	1.0174	0.227289	0.670116	0.981626	0.853294	0.352219	1.06402	1.06976	1.11447	1.07245	1.06671	1.06787	0.993256	0.727642	1.06717	1.06787	1.21594	0.885778	1.06359	1.06694	1.06558	0.860288
1154	icd	0	0.253701	0.31577	0.567176	0.12955	0.296611	1.86414	0.27104	0.258058	0.2624	0.159439	0.303404	0.0609258	0.288145	0.418921	0.355732	0.0242107	0.305022	0.292385	0.27104	0.240539	0.134808	1.36541	0.2026	0.252481	0.358731	0.312165	0.0521262	0	0.28389	0.172594	0.304527	0.120343	0.231688	0.209285	0.412481	0.0145143	0.222774	0.209285	0.320315	0.123928	0.292385	0.227239	0.253701	0.275707
1155	ymfD	-0.421965	-0.683943	-1.10604	-0.70102	-0.560324	-0.915034	-0.755816	-1.02531	-0.515188	-0.674028	-1.08513	-0.523156	0	-0.924684	0	-0.20248	0.0790761	-0.905448	-0.729655	-0.94418	-0.154765	-0.93059	-0.710963	2.13403	-0.534328	-1.1217	-0.830166	0.48333	-1.25496	-0.809533	-1.13752	-0.24582	-0.697078	-0.0048538	-0.110389	-0.381703	-0.617003	-1.08033	-1.01457	-1.01973	0.159691	-1.00098	0	0	0.63384
1156	ymfE	0	-0.148176	0	-0.468176	-0.276882	-0.108176	0	0	-0.171574	-0.148176	-0.0417697	-0.188176	-0.825755	-0.108176	-0.795682	-0.280881	-0.39121	-0.108176	-0.36177	-0.108176	-0.678762	0	-0.468176	0	0	0	0	0	0	-0.268176	0	-0.508176	0	-0.558762	-0.118762	-0.348176	0	0	-0.108176	-0.108176	-0.706079	0	-0.762366	-0.743595	0
1157	lit	0.150255	-0.726636	-0.739502	-1.04371	-0.556299	-0.857726	-0.903435	-0.756265	-0.616377	-0.716721	-0.569329	-0.165849	-0.0177807	-0.867377	0	0	1.32225	-0.84814	-0.513852	-0.886873	-0.731443	-1.07821	-1.05366	-1.05507	-0.240928	-0.685983	-0.727786	-0.201682	-1.06871	-0.652226	-0.868474	-0.688513	-0.70771	-0.781532	-0.787067	-0.424396	-0.210968	-0.811279	-0.957262	-0.962424	-0.662586	-0.731935	0.370273	-0.264003	1.39051
1158	intE	-0.936144	0.450004	0.389036	0.29907	0.646612	0.498914	0.489264	0.469768	0.454971	0.45992	0.37862	0.580791	0.29907	0.489264	0.884	0.79907	0	1.0085	0.890338	0.469768	0.435002	0.314489	0.945173	0.29907	0.29907	0.373383	0.29907	0.695311	0	0.734414	0.357558	0	0.29907	0.424913	0.399378	0.352244	0.628076	0.414754	0.399378	0.394217	0.328087	0.494097	0.234706	0.450004	0.279039
1159	xisE	0	0.762188	0.762188	0.656046	0.262188	0.762188	0.762188	0.762188	0.762188	0.762188	0.762188	0.762188	0.729452	0.762188	0.762188	0.134093	0.530488	0.262188	0.762188	0.762188	0.762188	0.762188	0	0.63408	0.527629	0.762188	0.628031	0	0.257646	0.762188	0.762188	1.22058	0.761119	0.762188	0.762188	0.762188	0.262188	0.762188	0.762188	0.762188	0.762188	0.762188	0.762188	0.762188	0.262188
1160	ymfI	0	0	0.0899664	0	0.347542	0.199844	0	0.170698	0.155901	0.16085	0	0	0	0.190194	0	0	0	0.70943	0.195027	0.170698	0.135932	0	1.19462	0	0	0.0743131	0	0	-0.340061	0.185344	0.0584881	0	0	0.125843	0	0	0.329006	0	0.100308	0	0	0.195027	0.120772	0	0
1161	ymfJ	0	0.150934	0	0	0	0	0.190194	0	0	0	0.0795497	0	0	0	0.00444829	0	0	0	0	0	0	0.0154194	0	0	0	0	0	0	0	0	0	0	0	0	0	0.0531743	0	0.115684	0	0.0951466	0.029017	0	0	0	0.425222
1162	cohE	0.240346	0	0	0	0	0	0	0	0	0	0	0.0317212	0	0	0	-0.374033	-0.0766662	0	0	0	0	0	0	0	0	0	0	-0.174792	0	0	0	0.249592	0	0	0.100308	0	0	0	0	0	0	0	0	0.150934	0
1163	croE	0	0	0	0	0	0	0	0	0	0	0	0	0	0	0	0	0	0	0	0	0	0	0	0	0	0	0	0	0	0	0	0	0	0	0	0	0	0	0	0	0	0	0	0	0
1164	ymfL	0.115964	-0.162965	0.276067	0	-0.304209	-0.114055	-0.123705	-0.143202	-0.157999	-0.153049	-0.23435	0.186101	-0.335594	-0.123705	-0.309451	-0.567962	-1.09628	-0.104469	-0.118872	-0.143202	-0.177967	-0.29848	-0.429985	-0.442007	-0.0484581	-0.239586	-0.448056	-0.401295	0.0102728	-0.128555	0.244589	0.00556567	0.477513	-0.188056	0.186101	-0.260725	-0.484893	-0.198216	-0.213591	-0.218753	-0.284882	-0.118872	-0.193127	0.186101	-0.388678
1165	ymfM	0	0	0	0.344185	-0.162148	0	0	0	0	0	0	0	-0.011042	0	0	0	0	0	0	0	0	0	0.217347	0	0	0	0	0	0	0	0	0	0	0.125942	0	0	0	0	0	0	0.0291159	0	0	0	0
1166	oweE	0	0	0	0.117138	0.105292	0	0.11461	0	0.41365	0	0	0	0	0	0	0	0	0	0	0	0	0	0	0	0	0	0	0	-0.562398	0	0	0	-0.00838839	0	0	0.700899	0	0	0	0	0	0	0	0	0
1167	aaaE	-0.0634351	-0.547138	-0.274773	-0.490517	0	-0.352172	-0.0188382	-0.518838	0	-0.175569	-1.19404	-0.518838	0	-0.352172	-0.482175	-1.09033	0	-0.518838	-0.518838	-0.889029	-0.0188382	-0.277868	-0.333275	-1.06836	0	-0.518838	-0.83223	-0.822438	0	-0.352172	-0.0394476	-0.185505	-0.360216	-0.185505	-0.080858	0	-0.535733	-0.415722	-0.434178	-0.0746051	-0.3823	-0.352172	-0.410634	-0.541415	-0.449665
1168	ymfR	-0.31981	-0.575514	-0.575514	-0.0275573	-0.362215	-0.721571	-0.731221	-0.58405	-0.660682	-0.408847	0	-0.723027	-0.393599	-0.731221	-0.786963	-0.144687	-0.807573	-0.545318	-0.559721	-0.213859	-0.785483	-0.646966	-0.38973	0	-0.875035	-0.680435	-0.575514	-0.54667	0	-0.73607	-0.64733	-0.685691	-0.24218	-0.628905	-0.759087	-0.0232403	-0.24218	-0.74218	-0.7391	-0.575514	-0.528936	-0.726388	-0.74218	-0.581237	-0.565366
1169	beeE	-0.198204	-0.0283	-0.089268	0	-0.452387	0	0	0	0	-0.0183845	0	0	-0.348407	0	-0.130004	-0.80733	-0.126569	0	0	-0.00853676	0	-0.092363	-0.185967	-0.0289963	0	0	-0.313391	-0.138181	0	0	-0.0489302	0	-0.180303	0	-0.0620198	-0.415265	-0.350228	-0.0635509	-0.0696845	-0.0840878	-0.0993014	0	-0.058462	-0.00321907	0
1170	jayE	-0.163392	0	0	0.119144	0	0	0	0	0	0	0.928037	0	0	0	0	0	0	0	0	0.0180866	0	0	0	0.171897	0	0	0	0	-0.034136	0	0.182386	0	0	0.0275187	0	0	0.0640149	0	0	0	0	0	0	0	0.152793
1171	ymfQ	0	0	0	0	0	0	0.353583	0	0	0	0	0	0	0	0	0	0	0	0	0	0	0	-0.0256583	0	0	0	0	-0.0171239	0	0	0	0	0	0	0	0	0	0	0	0	0	0	0	0	0
1172	stfP	0	0	0	0	0	0	0	0	0	0	0.0498653	0	0	0	0	0	-0.26328	0	0	0	0	0	-0.0143913	0	0	0	0	0	0	0	0	0	0.119067	0	0	0	0	0	-0.0184831	0	0	0	0	-0.0290364	0
1173	tfaP	0.125962	0	0.0578773	0.043751	-0.314232	-0.0246034	0.363694	-0.044673	0	0	-0.00451896	-0.0167957	0	-0.00278605	-0.0895645	0	0	-0.0201509	0	0	0.022431	-0.142904	-0.178657	-0.0948873	-0.541572	-0.2327	0	-0.0043964	0.407837	0	-0.143632	-0.237956	0	-0.0811698	-0.0338126	0	0	0.117887	0	0.195654	-0.101832	-0.111986	0	-0.0211255	0.118431
1174	tfaE	0	0.0206968	0	0	0	0	0.339994	0	0.0445716	0.0651988	0	0	0	0	0	0	0	0	0.0160426	0.0735393	0.0722048	0	0	-0.152593	0	0	0	0	0.00726371	0.00636	0	0	0.068836	0	0	0	-0.0833895	0.423858	0.238603	0.102755	-0.0735935	0	0	0	0
1175	stfE	0	-0.107923	0	0	0	-0.111939	-0.123058	-0.130918	0	-0.0773958	-0.175635	0.0150871	-0.288456	-0.162905	0	0.156461	-0.0931397	-0.108617	-0.0956253	0	-0.0473685	-0.160795	-0.238679	0	0	0	-0.248285	-0.179189	0.318903	-0.116963	0	0	0	0	-0.0952719	-0.202382	0	0	0	0	0	0	-0.160022	-0.020437	0
1176	pinE	-0.431104	0	0.250759	0	0.212968	0	0	0	0	0	0	0.187073	0	0	0.0363779	0	0	0	0	0	-0.0370269	0	0	0	0	0.078085	-0.068368	0	0	0	0.06226	0.239496	0.220973	0.296282	0	0	0.263605	0	0	0	0.0327889	0.0321322	-0.0193709	0	0.0884962
1177	mcrA	-0.116542	0	0	-0.225954	0	-0.0420854	-0.102795	0	0.0940678	0	0	0	-0.0329561	0	0	-0.225093	-0.187976	-0.014004	0	-0.384632	-0.135109	-0.26897	-0.358672	0	0	0	0	0	0	-0.153035	0	0	0	0	0	0	0	0	-0.0213146	0	0	0	0	0	0.773619
1178	icdC	-0.099496	0	0	0	0	0	0	0	0	-0.321081	0	-0.0835542	-0.226768	0	-0.657482	-0.0114492	0	0	0	0	0	-0.0181022	0	0	-0.675069	0	0	0	-0.0177032	0	0	0	0	0	0	0	-0.199063	0	0	0	0	-0.871167	0	-0.0209853	0
1179	iraM	0	-0.555852	-0.500255	-0.420099	-0.120662	-0.580176	-0.491938	-0.730038	-0.341423	-0.161026	-0.568287	-0.282914	-0.00814111	-0.405451	0.416016	0	-0.234252	-0.6485	-1.17431	-0.111	-0.114966	-0.43515	-0.396851	-1.09163	-0.272641	-0.797069	-0.882394	-1.00814	0	-0.422307	-0.856665	-0.954945	-0.903151	-0.589658	-0.0784854	-0.595455	0	-0.534389	-0.69042	-0.526994	-0.728945	0	-0.176376	-0.299684	0
1180	ycgX	-0.203704	-0.718842	-0.595119	-0.23965	-0.23128	-0.817516	-0.832783	-0.468922	-0.427424	-0.789163	-0.412725	-0.422363	-0.699995	-0.887856	0	-0.470357	0	-0.73103	0	-1.01238	-0.648951	-0.735766	-0.702382	-0.560043	-0.538209	-0.705165	-0.731083	-0.393684	-0.764106	-0.802429	0	0	0	-0.639914	-1.09916	-0.645391	-0.23864	-0.827339	-0.556721	-0.831915	-0.560387	0	-0.713276	-0.97874	-0.112931
1181	bluR	-0.385876	-0.0437559	-0.0943596	0	0	-0.0396032	0	-0.278738	0	0	0	0	0	0	-0.760022	-0.244786	-0.391791	0	0.00626564	0	0	0	-0.222425	-0.11025	0	-0.0741804	-0.0911712	0	0	-0.0155217	0.175767	0.0193042	0.331753	-0.0837624	0	-0.151301	0	0	-0.173926	0	0	-0.536568	-0.08842	0	-0.0551507
1182	bluF	0	0.973611	0.992781	1.03897	0.927846	1.01553	1.00726	0.764128	0.977868	0.98211	0.983853	1.08571	1.26902	1.00726	0.848051	1.00265	0	1.02375	1.00693	0.990551	0.960752	1.3508	0.744737	0.734432	0.714617	0.907935	0.729247	0.684284	0.0154879	1.00311	0.768824	0.889642	0.648139	1.16639	1.0168	0.818388	1.13838	0.943396	0.930217	0.925793	0.86911	1.0114	0.947758	0.973611	0.875998
1183	ycgZ	-0.626012	0.497751	0.757336	0.530432	0.224869	0.518712	0.514576	1.18549	0.499879	0.502	0.752872	0.303802	0.645458	0.514576	0.434971	0.366029	0.665162	0.522821	0.517543	0.506221	0.491321	1.41307	0.383314	0.378161	0.618254	0.464913	0.375569	1.07981	2.09039	0.512498	0.483241	0.465419	1.64713	0.344141	0.71629	1.17014	1.12262	0.482643	0.476054	0.473842	0.445501	0.516648	0.484824	0.497751	0.613451
1184	ymgA	0	-0.242306	-0.046723	0	-0.0728235	-0.0110784	-0.0149162	0	-0.0199089	-0.250399	-0.0975224	-0.300548	0	0	-0.0159687	0	-0.0108297	-0.00726606	-0.145559	0	-0.15177	0	0	0	0	-0.0523558	-0.461254	0	0.0324354	0	0	0	0	-0.0770013	0.106116	0	-0.190719	-0.632854	0	-0.052716	-0.171432	-0.00434855	0	0	0.170986
1185	ariR	-0.119864	-0.226459	-0.450468	-0.299642	-0.178183	0	0	0	0	0	0	0	-0.607125	0	0	0	0	0	0	0	0	-0.738176	-0.786115	-0.798138	-0.988155	0	0	0	0	0	-0.0637445	0	0	0	0	0	0	0.214176	0	0	0	0	0	0	0
1186	ymgC	0	-0.0771085	-0.209501	-0.486499	-0.0524542	-0.537888	-0.543117	-0.591743	-0.593397	-0.266688	-0.266528	-0.146078	0	-0.633218	-0.18744	-0.121998	-0.153329	-0.532695	-0.38776	-0.647298	-0.483178	0	0	0	0	-0.6376	-0.491032	-0.437534	-0.200049	-0.433016	-0.20563	-0.375843	-0.395384	-0.305826	-0.366194	-0.529865	-0.267918	0	-0.522209	-0.594612	-0.624914	-0.572198	-0.551139	-0.393053	-0.0938662
1187	ycgG	0.108607	0.0677655	0.00679746	0	0.0977067	0	0	0	0	0	0	0	0.384094	0	0	0.317057	0	0	0	0	0	0.300706	1.9342	0.04962	0.17273	0	0.0839	-0.187044	0	0	0	0	0	0	0.0969472	0.0674992	0.176664	1.83906	0	0	0	0	0	0	0
1188	ymgF	0.0226987	-0.562217	-0.419369	-0.257589	-0.21831	-0.536523	-0.544671	-0.477171	-0.490054	-0.619693	-0.206254	-0.49703	-0.127227	-0.294257	-0.30588	-0.0212374	-0.293656	-0.528429	-0.488717	-0.310504	-0.371469	0.277799	0.0851878	0.880521	0.241036	-0.558945	-0.143077	-0.0443115	-0.618814	-0.576076	-0.490066	-0.429791	-0.386558	-0.505159	-0.169997	-0.487053	-0.250464	0	-0.563606	-0.624927	-0.240789	-0.457017	-0.0820895	-0.465862	-0.178907
1189	ycgH	0.406536	-0.412548	-0.473516	-0.669625	-0.71594	-0.363638	-0.373289	-0.392785	-0.407582	-0.402632	-0.483933	-0.531761	-0.596219	-0.373289	-0.559034	1.39338	-1.42253	-0.354052	-0.368455	-0.392785	-0.42755	-0.548063	-0.679568	-0.69159	-0.798041	-0.489169	-0.697639	0.259292	-1.82427	-0.378138	-0.504994	-0.494425	-0.564551	-0.437639	-0.463174	-0.510308	-0.734476	-0.447799	-0.463174	-0.468336	-0.534465	-0.368455	-0.44271	-0.412548	-0.638261
1190	ymgD	0.0979286	0	0	1.08795	-0.00637204	0	0	0	0	0	0	0	0	0	0	-0.0204711	0	0	0	0	0	0	0	0	0	0	0	0	-0.143216	0	0	0	0	0	0	0	0	0	0	0	0	0	0	0	0
1191	ymgG	0	0	0	0	0	0	0	0	0	0	0	0	0	0	0.0148578	0	0	0	0	0.0697135	0	0	0	0	0	0	0	0	0	0	0	0	0	0	0	0	0	0	0	0	0	0	0	0	0
1192	ymgI	0	0	0	0	0	0	0	0	0	0	0	0	0	0	0	0	0	0	0	0	0	0	0	0.0835948	0	0	0.0215215	-0.0213529	0.0879817	0	0	0.0790644	0	0	0.0540649	0	0.0272384	0	0	0	0	0	0	0	0.0100232
1193	ymgJ	0.0413833	0	0	0	0	0	0	0	0	0	0	0	0	0	0	0	-0.271515	0	0	0	0	0	0	0	0	0	0	-0.164709	0	0	0	0	0	0	0	0	0	0	0	0	0	0	0	0	0
1194	ycgI	0	0.367198	0.37254	0	0.0827676	0.397425	0.388378	0.370101	0.558179	0.517118	0.362775	0.23981	0.381331	0.388378	0.434456	0.277482	0	0.406412	0.392909	0.303655	0.415633	0.224527	0.179367	0	0.264938	0.357865	0.157537	0	0	0.461957	0.264904	0.21508	0.224695	0.406175	0.19008	0.571248	0.163254	0.39665	0.382236	0.455522	0.331025	0.392909	0.323296	0.351573	0.146039
1195	minE	0	0	0	0	0	0	0	0	0	0	0	0	0	0	0	0	0	0	0	0	0	0	0	0	0	0	0	0	0	0	0	0	0	0	0	0	0	0	0	0	0	0	0	0	0
1196	minD	-0.19105	0.539511	0.274269	0.358603	0.463663	0.364238	0.361825	0.356951	0.191692	0.229489	0.271664	0.322207	0.144533	0.361825	0.136247	0.0322531	0.0232846	0.366634	0.363034	0.396165	0.28576	0.318132	0.222756	0.737507	0.552818	0.270355	0.417844	0.120146	0	0.298113	0.328899	0.563515	0.50151	0.283238	0.619766	0.47851	0.37529	0.280698	0.276854	0.213064	0.446531	0.363034	0.34447	0.352011	0.48872
1197	minC	0.118453	-0.305121	-0.366089	-0.0621983	-0.108514	-0.256212	-0.265862	-0.285358	-0.300155	-0.295206	-0.376506	-0.424335	-0.488792	-0.265862	-0.451607	-0.084151	-0.179348	-0.246626	-0.261029	-0.285358	-0.320124	-0.440636	-0.572141	-0.0841637	-0.690615	-0.381743	-0.590213	-0.635889	-1.21685	-0.270711	-0.397568	0	-0.457124	-0.330212	0	0	-0.127049	-0.340372	-0.355747	-0.360909	-0.427039	-0.261029	-0.335283	-0.305121	-0.0308342
1198	ycgJ	0	0	0.0956982	0	0	0	0	0	0	0	0	0	0.0768177	0	0	0.433245	-0.231808	0	0	0	0	0	0	0	0	0	0.0514499	0	0.393867	0	0	0	0	0	0	0	0	0	0	0	0	0	0	0	0
1199	pliG	0.245206	0.400573	0.64039	0.383643	0.278999	0.388116	0.368885	0.391666	0.32119	0	0.329188	0.0649072	0.517687	0.431543	0.344996	0	0	0.459068	0.434137	0.564423	0.476479	0.265058	0.0422875	0.12153	0	0.251189	0	0.0295859	0	0.498793	0.452214	0.409605	0.430388	0.536708	0.349946	0.484631	0.351372	0.110458	0.440856	0.344785	0.369564	0.434137	0.298312	0.400573	0.265769
1200	ycgL	0.0182467	0	0	0	0	0	0	0	0	0.630447	0	0	0	0	0	0	0.185805	0	0	0	0	0	0	0	0.195837	0.0800387	0.547509	0.118411	0	0	0	0	0	0	0	0	0	0	0	0	0	0	0.0793087	0	0
1201	ycgM	0	0	0	0	0	0	0	0	0	0	0	0.264553	0	0.0101308	0	0	0	0	0.0128672	0	0	0	0.171388	0	0	0	0	0	0	0.0331205	0	0	0	0.0251677	0	0	0	0	0	0	0	0.0128672	0	0	0
1202	ycgN	0	0	0	0.119459	0	0.22501	0.260139	0.105121	0.309279	0	0	0	0	0	0	0	0	0	0	0	0	0	0.153808	0	0	0	0.305523	0.145786	0	0	0	0	0	0	0	0	0	1.26784	0	0	0	0	0	0	0
1203	hlyE	0.0234452	0.174591	0.25648	0.361389	0.240479	1.19399	1.28452	1.45474	1.09169	0.711861	0.103206	0.349072	0.276634	0.210956	0.599533	0.441551	0.313609	0.375944	0.215007	0.337211	0.159589	0.32479	0.0564271	0.0384057	0.398183	0.37225	0	0.0744342	0.265952	0.199538	0.367859	0.0927138	0.0225878	0.142309	0.409679	0.815392	0.507657	0	0.123965	0.118803	0.421954	0.215007	0.56167	0.174591	0.318158
1204	umuD	-0.152387	-1.21484	-1.15157	-0.926462	-1.08597	-0.557432	-0.490556	-0.354788	-0.463782	-0.812022	-1.02991	-1.09906	-1.07261	-0.993762	-0.853602	-0.057578	-0.0519761	-1.15634	-1.26166	-1.01326	-1.32075	-1.07763	-1.39095	-1.05685	-0.23164	-0.874647	-1.21176	-0.773837	-0.785791	-1.18043	-0.928202	-1.29672	-1.18502	-1.14902	-1.08365	-0.933516	-0.938135	-0.961916	-1.26547	-1.36154	-1.10176	-1.26166	0	-1.21484	-0.486748
1205	umuC	-0.337464	-1.0941	0	-0.63955	-1.52636	-1.70259	-1.77912	-1.93438	-1.84019	-1.487	0	-1.32909	-1.42	-1.27591	-1.60182	-1.44542	0.488436	-1.0941	-1.00319	-1.27591	-1.00319	-1.36682	-0.185004	-1.53113	-2.46279	-1.51091	-1.38227	0	0	-1.0941	-0.473179	-1.0941	-0.275913	-0.185004	-0.275913	-1.47318	-0.107766	-1.38227	-1.0941	-0.00318615	-0.329092	-1.00319	-2.3391	-1.0941	-1.0479
1206	dsbB	0	0	0	0	0	0	0	0	0	0	0	0	0	0	0	0	0	0	0	0	0	0	0	0	0	0	0	0	0	0	0	0	0	0	0	0	0	0	0	0	0	0	0	0	0
1207	nhaB	0.66514	1.70263	1.64166	1.44555	2.69172	1.75154	1.74189	1.72239	1.7076	1.71254	1.63124	1.58342	1.51896	1.74189	1.55614	1.4236	0.692645	1.76112	1.74672	1.72239	1.68763	1.56711	1.93561	1.42359	1.31714	1.62601	1.41754	1.58199	1.08339	1.73704	1.61018	1.62075	1.55063	1.67754	1.652	1.60487	1.3807	1.66738	2.152	1.64684	1.58071	1.74672	1.67247	1.70263	1.47692
1208	fadR	0	0	0	0	0	0	0	0	0	0	0	0	0	0	0	0	0	0	0	0	0	0	0	0	0	0	0	0	0	0	0	0	0	0	0	0	0	0	0	0	0	0	0	0	0
1209	ycgB	-0.158647	1.32861	1.26764	1.86401	1.02521	1.37752	1.36787	1.34837	1.33357	1.33852	1.25722	1.20939	1.64494	1.36787	1.18212	0.549577	0.318622	1.3871	1.3727	1.34837	1.3136	1.19309	1.06159	1.54956	0.943113	1.25199	1.04351	1.41548	0.916882	1.36302	1.23616	1.24673	1.1766	1.30352	1.27798	1.23085	1.50668	1.29336	2.93894	1.77282	1.20669	1.3727	1.29844	1.32861	1.10289
1210	dadA	-0.701237	1.73782	1.67686	1.48075	1.43443	1.78673	1.77708	1.75759	1.74279	1.74774	1.66644	1.61861	1.55415	1.77708	1.59134	0.958794	0.72784	1.79632	1.78192	1.75759	1.72282	1.60231	1.4708	1.45878	1.35233	1.6612	3.40618	0.824701	0.826099	1.77223	1.64538	2.15595	1.58582	1.71273	1.6872	1.64006	2.57686	1.70257	1.6872	1.68204	1.61591	1.78192	1.70766	1.73782	1.51211
1211	dadX	0.217489	0.0602062	0.165905	-0.196871	0.0901474	0.109116	0.0994656	0.0799695	0.0651725	0.0701217	0.155488	-0.0590069	-0.123465	0.0994656	0.0803868	0.045337	-0.185617	0.118702	0.104299	0.246636	0.045204	-0.0753088	1.02808	0.716949	-0.325287	-0.0164151	0.567596	0.0458032	-0.587358	0.0946162	0.301093	0.144996	-0.0917969	0.0351152	0.00958014	-0.0375538	-0.0950552	0.455782	0.00958014	0.00441843	0.202449	0.104299	0.0300442	0.0602062	0.0011601
1212	cvrA	-1.49238	3.04652	2.98555	2.78944	2.74312	3.09543	3.08578	3.06628	3.05148	3.05643	2.97513	2.9273	2.86284	3.08578	2.90003	2.26749	2.03653	3.10501	3.09061	3.06628	3.03151	2.911	2.7795	3.55995	2.66102	2.96989	2.76142	2.13339	1.63479	3.08093	2.95407	2.96464	2.89451	3.02142	2.99589	2.94876	2.72459	3.01126	2.99589	2.99073	2.9246	3.09061	3.01635	3.04652	2.8208
1213	ldcA	0.084256	0.354152	0.434212	0.0977814	0.247498	0.3346	0.326678	0.176346	0.240655	0.30259	0.235851	0.233902	0.119396	0.363992	0.319235	0.345555	0.34617	0.424559	0.330646	0.310674	0.282135	0.273353	0.242677	0.936137	0.167661	0.313642	0.120122	0.279516	0.0911368	0.360011	0.218562	0.20485	0.251761	0.484638	0.252892	0.273901	0.162119	0.265513	0.502404	0.398002	0.451759	0.330646	0.329392	0.37654	0.0929896
1214	emtA	0	0	0	0	0	0	0	0	0	0	0	0	0.0499797	0	0	0	0	0	0	0	0	0	0	0	0.0226503	0	0	0.0937242	0.355134	0	0	0	0	0	0	0	0	0	0	0	0	0	0	0	0
1215	ycgR	-0.0175661	0.738688	0.655885	0.930615	0.552822	0.702021	0.694531	1.26149	0.918696	0.671757	0.608658	0.743179	0.826776	0.866173	0.783543	0.507458	0.0116505	0.687073	0.698282	0.6794	0.652418	0.501583	0.59298	0.210014	0.48261	0.582206	0.517423	1.01927	0.373163	0.862409	0.592312	0.69753	0.523701	0.731189	0.624769	0.662815	0.704129	0.636702	0.738539	0.835246	0.787417	0.698282	0.715279	0.641673	0.399326
1216	ymgE	0	0	0	0	0	0	0	0	0	0	0	0	0	0	0	0	0.247468	0	0	0	0	0	0	-0.0143654	0	0	0	0	0	0	0	0	0	0	0	0	0	0	0	0	0	0	0	0	0.239466
1217	ycgY	-0.237611	0	0	0	0.0045289	0	0	0	0	-0.0572326	-0.0142454	0	-0.0311938	-0.0312615	0	0	0.0293629	-0.0142364	0	-0.0944938	0	0.393314	-0.0503269	0	-0.190754	-0.1798	-0.270213	0	0.057057	-0.0240593	-0.0673689	0	-0.155427	0	0	0	-0.0403685	-0.0613835	0	0	0	-0.0499724	0	0	0.243901
1218	treA	-0.428686	-0.266434	-0.47026	0.223463	0.366343	-0.360382	-0.0843178	0.0390432	-0.177902	-0.525881	-0.333749	-0.385648	0.0244558	-0.503957	-0.698635	-0.533327	0.302426	-0.489585	-0.365199	-0.219673	-0.138579	-0.318383	-0.578366	0.168809	-0.228146	-0.291684	-0.0590518	-0.214573	0.674013	-0.0822931	-0.625347	0.0669587	-0.147606	-0.434382	-0.602775	-0.221337	0.150198	0.151161	0.505066	-0.238656	0.463903	-0.350921	-0.296596	-0.552149	0
1219	dhaM	-0.0710332	0.460075	0.563358	0.502426	0.595595	0.645181	0.637995	0.623477	0.612458	0.616143	0.73666	0.626367	0.645218	0.35533	0.77627	0.184798	0	0.65232	0.641594	0.623477	0.597588	0.779353	1.76305	0.677558	0.955638	0.849573	1.32548	0.214201	0.631157	0.610932	0.51864	0.526511	0.859283	0.590075	0.374755	0.493406	0.385447	0.400415	0.719995	0.567215	0.376899	0.641594	0.522102	0.587483	0.589612
1220	dhaL	-0.0578689	0.249577	0	0	0	0	0	0	0	0	0	0	0	0	0	0	0.200042	0	0	0	0	0.0442523	0.138496	0	0	0	0	-0.0506212	0.0588836	0.00365089	0	0	0	0	0	0	0.0795781	0	0	0	0.201084	0	0.051152	0	0
1221	dhaK	-0.0672559	0.413356	0.462422	0.489303	0.501107	0.56061	0.551987	0.534565	0.521342	0.525764	0.611888	0.538032	0.746452	1.54131	0.417916	0.566646	0.363145	0.569176	0.556306	0.534565	0.503498	0.334892	0.329474	0.299462	0.907047	0.40588	0.803027	0.20193	0.999871	0.620607	0.50876	0.518205	0.40054	0.494482	1.65873	0.57848	0.472803	1.12273	0.450387	0.467051	0.398996	0.556306	0.586757	0.591372	0.293926
1222	dhaR	-0.132622	1.25488	1.19391	0.997799	1.28482	1.30379	1.29414	1.27464	1.25984	1.26479	1.18349	1.13566	1.07121	1.29414	1.10839	0.80918	0.578226	1.31337	1.29897	1.27464	1.23987	1.11936	1.32119	0.975834	0.869383	1.17826	1.63645	1.20341	0.509818	1.28929	1.16243	1.173	1.43621	1.22979	1.20425	1.82378	1.26628	1.55296	1.20425	1.19909	1.13296	1.29897	1.55805	1.25488	1.3625
1223	ycgV	0	0	0	0	0	0	0	0	0	0	0	0	0	0	0	0	0	0	0	0	0	0	0	0	0	0	0	0	0	0	0	0	0	0	0	0	0	0	0	0	0	0	0	0	0
1224	ychF	-0.442388	1.09445	1.11824	0.932544	0.884354	1.18775	1.15453	1.18537	1.12342	1.28281	1.1022	1.02404	1.04949	1.179	1.26058	0.805359	0.560194	1.19645	1.18338	1.14993	1.12976	1.12679	1.2711	1.00946	0.932306	1.17971	1.01863	0.850155	0.994443	1.20478	1.11094	1.05792	1.21499	1.14468	1.09085	1.06797	0.874716	1.38538	1.12342	1.17466	1.03715	1.18338	1.15321	1.14338	1.08271
1225	pth	0.108103	1.47229	1.23608	1.26614	1.21923	1.35172	1.41254	1.25428	1.4113	1.20539	1.25315	1.35909	1.05556	1.35138	1.06128	0.701297	1.15485	1.35207	1.35155	1.40209	1.34942	1.29655	0.61608	1.20841	1.16365	1.30099	1.40517	0.966168	0.530037	1.23951	1.14611	1.36044	0.88642	1.25266	1.3779	1.29871	1.18612	0.263715	1.25543	1.36058	1.34528	1.35155	1.20037	1.34996	1.32607
1226	ychH	-0.0232685	0.222348	0.234799	0	0.208272	0.216228	0.232246	0.311578	0.20223	0.327024	0.228422	0.138213	0.363356	0.207781	0.427586	0.501901	0.165945	0.224618	0.212011	0.110214	0.160287	0.0788701	0.766742	0.143244	0	0.12679	0.188792	0.0596034	0.0542636	0.318282	0.328737	0.170892	0.567793	0.272318	0.0825104	0.132525	0.242838	1.46863	0.21414	0.173119	0.0195264	0.212011	0.331877	0.173418	0.038464
1227	dauA	-0.236539	0.446356	0.667578	0.826707	0.321819	0.513049	0.483228	0.429922	0.475062	0.416807	0.417071	0.569145	0.337804	0.510751	0.227427	0	0	0.515332	0.511902	0.717268	0.49783	0.458362	0	0.444127	0.464692	0.481905	0.237019	0.422522	0.70759	0.690291	0.482289	0.578036	0.238349	0.419241	0.611568	0.601776	0.184178	0	0.747973	0.449825	0.977842	0.511902	0.391046	0.501402	0.40306
1228	prs	0.422199	0.491422	0.690046	1.34731	0.562875	0.5181	0.51839	0.516663	0.486819	0.511187	0.385492	0.331279	0.677268	0.509216	0.383331	-0.138823	0	0.526925	0.513666	0.949202	0.459262	0.351905	0.373187	1.21312	0.0849942	0.35532	0.196039	0.586244	0.585749	0.777854	0.386998	0.365652	0.742088	0.475369	0.774128	0.341855	0.256886	0.93829	0.868577	0.434478	1.75916	0.513666	0.391727	0.473073	0.280141
1229	ispE	0.0626868	0	0	0.602687	0	0	0	0	0	0	0.132919	0	0	0	0.103743	0.121051	0.628669	0	0	0	0	0	0	0	0.0444676	0.142894	0.24021	0	0.542537	0	0	0	0	0	0.419753	0	0	0	0	0	0	0	0.263907	0	0
1230	lolB	0.583441	0.732629	0.671661	0.340875	0.429237	0.781539	0.938555	0.752392	0.737595	0.742545	0.761452	0.613416	0.548958	0.771889	1.03427	0.490568	0.172471	0.791125	0.776722	0.752392	0.884294	0.763781	0.798943	0.981908	0.755729	0.751228	0.591593	0.417	0.071183	0.767039	0.640183	0.650752	0.580626	0.707538	0.472126	0.801536	0.744034	0.697378	0.682003	0.676841	0.777378	0.776722	0.834674	0.732629	0.506916
1231	hemA	0.122811	-0.105493	-0.166461	-0.36257	-0.408885	-0.0565835	-0.0662337	-0.0857299	-0.100527	-0.0955777	-0.176878	-0.224706	0.710836	-0.0662337	-0.251979	-0.884523	-0.152814	-0.0469975	-0.0614005	-0.0857299	-0.120495	-0.241008	-0.372513	-0.384535	-0.490986	-0.182114	3.77934	-1.01862	1.43262	-0.0710831	-0.197939	0.81263	-0.257496	-0.130584	-0.152814	3.70364	0.572579	-0.140744	-0.156119	-0.161281	-0.22741	-0.0614005	-0.135655	-0.105493	-0.331206
1232	prfA	0.578289	3.3046	0	0	0	0	0	0	0	0	0	0	0	0	0	0	-0.962663	0	0	0	0	0	0	0	0	0	0	0	0.372086	0	0	0	0	0	-0.00330473	0	0	0	0	0	0	0	0	0	0
1233	prmC	0.0923474	1.72188	-0.0288899	-0.224999	-0.0213141	0	0	0	0	0	0	-0.0871351	-0.151593	0	-0.114408	0	0	0	0	0.0792254	0	-0.103437	-0.234942	-0.246964	-0.353415	0.0185865	-0.253013	-0.131044	-0.337165	0	-0.0603682	-0.0497989	0.0248724	0	0	-0.065682	0	-0.00317277	-0.018548	0	0	0	0	0	-0.193635
1234	ychQ	0	0	0	0	0	0	0	0	0	0	0	0	0	0	0	0	0	0	0	0	0	0	0	0	0	0	0	0	0	0	0	0	0	0	0	0	0	0	0	0	0	0	0	0	0
1235	ychA	0.543241	0.729112	1.4035	1.28904	1.06729	1.51338	1.61484	1.48423	1.46943	1.47438	1.39308	1.34525	1.50302	1.50373	1.31798	1.08377	0.546212	1.52296	1.50856	1.47543	1.43105	1.32895	1.19745	1.18542	1.25508	1.33244	1.46659	0.764136	0.696945	1.49888	1.37202	1.48605	1.42081	1.43937	1.41384	1.36671	1.25365	1.42482	1.54272	1.51979	1.45366	1.50856	1.4343	1.46447	1.23875
1236	kdsA	0	0.530566	0	0.0883815	0.281344	0	0	0	0	0	0	0	0	0	0	0	0.0581417	0	0	0	0	0	0	0	0	0.160008	0	0.135599	0	0	0	0.02294	0	0	0	0	0	0	0	0	0	0	0	0	0
1237	ldrA	0	0	0	0	0	0	0	0	0	0	0	0	0	0	0	0	0	0	0	0	0.165709	0	0	0	0	0	0	0	0	0	0	0	0	0	0	0	0	0.039569	0.425071	0	0	0	0	0	0
1238	rdlA	0	0	0	0	0	0	0	0	0	0	0	0	0	0	0	0	0	0	0	0	0	0	0	0	0	0	0	0	0	0	0	0	0	0	0	0	0	0	0	0	0	0	0	0	0
1239	ldrB	0	0	0	0	0	0	0	0	0	0	0	0	0	0	0	0	0	0	0	0	0	0	0	0	0	0	0	0	0	0	0	0	0	0	0	0	0	0	0	0	0	0	0	0	0
1240	rdlB	0	0	0	0	0	0	0	0	0	0	0	0	0	0	0	0	0	0	0	0	0	0	0	0	0	0	0	0	0	0	0	0	0	0	0	0	0	0	0	0	0	0	0	0	0
1241	ldrC	-0.503083	0.856851	0.812351	0.479729	0.506636	0.755562	0.745912	0.698721	0.794662	0.766379	0.627965	0.652929	0.877539	0.745912	0.885199	0.738763	0.287301	0.765148	0.750745	0.893082	0.556617	0.650247	0.635693	0.410884	0.619906	0.686697	0.403168	0.169891	0.406582	0.741063	0.74625	0.785812	0.634812	0.681562	0.715256	0.653154	0.683471	0.689671	0.538824	0.723726	0.612907	0.750745	0.758458	0.789663	0.561827
1242	rdlC	0	0	0	0	0	0	0	0	0	0	0	0	0	0	0	0	0	0	0	0	0	0	0	0	0	0	0	0	0	0	0	0	0	0	0	0	0	0	0	0	0	0	0	0	0
1243	chaA	-0.16297	0	0	0.0538875	0	0	0	0	0	0	0	0	0.285202	0	0	0	0.11211	0	0	0	0	0	0	-0.0333477	-0.139799	0	0	0	-0.373549	0	0	0	0	0	0	0	0	0	0	0	0	0	0	0	0
1244	chaB	0	0.045495	0	0	0.260587	0	0	0.11078	0	0.134088	0	0.0713748	0	0	0	0	0.172706	0	0	0	0.0264496	0	0.215761	0	0	0	0	0.236738	0	0	0	0	0	0	0.0964152	0.156288	0	0	0	0	0.220645	0	0	0	0
1245	chaC	0	0	0	0.299734	0	0	0	0	0.00347705	0	0.0876371	0	0.644597	0	0.421534	0.243594	0.111601	0	0	0	0.0496677	0.0506818	0	0.20072	0	0	0.220718	0.0872196	0	0	0.000438048	0.0216848	0.0380534	0	0	0	0	0.424644	0.165748	0.125662	0	0	0.0163928	0.00387253	0.0293585
1246	ychN	0.0350441	0.604871	0.451873	0.652778	0.224798	0.558259	0.550005	0.593176	0.617567	0.490784	0.53503	0.760742	0.0418025	0.550005	0.126161	0	0.503146	0.530173	0.554139	0.533329	0.452162	0.520357	0.478532	0.431032	0.363591	0.401254	0.443314	0.313276	0.728542	0.545857	0.566116	0.626924	0.492293	0.494964	0.566992	0.533642	0.260425	0.933743	0.524001	0.668816	0.401353	0.554139	0.594278	0.612963	0.410613
1247	ychO	0.0806455	0.232065	0.25315	0.356884	0.283844	0.311892	0.309172	0.191433	0.244647	0.267385	0.186542	0	0.415074	0.309172	0.53816	0.131928	0	0.408412	0.310534	0.303675	0.284548	0	0.19229	0.259812	0.107063	0.385093	0	0	0	0.307805	0.069031	0.164501	0.357967	0.29103	0.111487	0.242938	0.328348	0	0.165436	0.044663	0.341312	0.310534	0.140458	0.243225	0
1248	narL	0	0.229435	0.431435	0.125193	0.0821239	0.23837	0.2325	0.508332	0.230087	0.221822	0.195945	0.338133	0.0484786	0.2325	0.121812	0.240739	0.27703	0.304359	0.23544	0.220642	0.201823	1.17017	0.0193066	0	0.180872	0.323249	1.33626	1.2038	1.03941	0.229551	0.414444	0.19598	0.0161226	0.193359	0.3551	0.424404	0.296503	0.247497	0.217636	0.341953	0.0710648	0.23544	0.362693	0.227073	0.639281
1249	narX	0.502568	0.919415	0.943589	0.692121	0.884534	0.965771	0.957798	0.859493	0.924194	0.931505	0.857598	0.769145	0.930302	0.957798	0.803678	0.506435	0.181546	0.956503	0.961791	0.94169	0.912302	0.515118	0.712431	0.705925	0.690653	1.1017	0.318087	0.323606	0.12011	0.953791	0.774108	0.847096	0.971215	0.904631	0.832884	0.908806	0.721181	0.879003	0.872159	0.974336	0.842746	0.961791	0.851179	0.920089	0.71946
1250	narK	0.194974	1.08856	1.0276	1.33149	0.785171	1.13747	1.12782	1.10833	1.09353	1.09848	1.01718	0.96935	1.15489	1.12782	0.942077	0.309533	0.078579	1.14706	1.13266	1.10833	1.07356	0.953048	0.821543	1.05952	0.70307	1.01194	0.803472	0.175441	0.0730789	1.12297	1.49612	1.00669	1.18656	1.31347	1.03794	1.2408	0.766635	1.30331	1.03794	1.03278	0.966646	1.13266	1.0584	1.08856	0.86285
1251	narG	0	0	0	0	0	0	0	0	0	0	0	0	0	0	0	0	0	0	0	0	0	0	0	0	0	0	0	0	0	0	0	0	0	0	0	0	0	0	0	0	0	0	0	0	0
1252	narH	-0.000580991	0.675983	0.778581	0.478113	0.771837	0.770594	0.761127	0.742933	0.730307	0.736787	0.792305	0.616494	0.685605	0.761589	1.05333	0.158561	0.348074	0.779539	1.02788	0.743395	0.842074	0.598493	0.474623	0.639397	0	0.781926	0.460682	0	0.358042	0.752539	0.629774	0.778936	0.714228	0.828597	0.93949	0.635754	0.406528	0.680078	1.21454	1.21451	0.735397	0.766099	0.696806	0.724953	0.64194
1253	narJ	-0.0604585	0	0	0	0	0	0	0	0	0	0	0	0	0	0	0	0	0	0	0	0	0	0	0	0.646149	0	0	0.23085	0	0	0	0	0	0	0	0	0	0	0	0	0	0	0	0	0
1254	narI	-0.153293	0	-0.0506796	-0.371789	0	-0.065802	-0.0754521	-0.0949483	0	-0.104796	0	0	0	-0.0754521	0	-0.320621	-0.176575	-0.0562159	-0.070619	-0.0949483	-0.129714	-0.125227	0	0.376976	0	-0.191333	-0.399803	0.196191	0.426894	-0.0803015	-0.0821578	0	-0.141715	0	0	-0.212472	-0.146399	0	0	-0.0454994	0	-0.070619	-0.0198736	0	-0.340424
1255	rttR	0.0384098	0	0.142608	0	0	0	0	0	0	0	0	0	0	0	0	0	0	0	0	0	0	0	0	0	0	0	0	0	0	0	0	0	0	0	0	0	0	0	0	0	0	0	0	0	0
1256	tpr	0	0	0	0	0	0	0	0	0	0	0	0	0	0	0	0	0	0	0	0	0	0	0	0	0	0	0	0	0	0	0	0	0	0	0	0	0	0	0	0	0	0	0	0	0
1257	tyrV	0	0.965803	0.372053	0.492147	0.356791	0.600189	0.598726	0.588304	0.570936	0.558691	0.464146	0.488007	0.419455	0.59503	0.360069	0.872938	0.509196	0.605314	0.50337	0.584608	0.517052	0.501597	0.440519	0.480181	0.292603	0.505287	0.407481	0.249369	0.0641304	0.628635	0.595903	0.487159	0.443812	0.544161	0.452734	0.505554	0.546013	0.651037	0.422273	0.381182	0.515152	0.597614	0.557918	0.574042	0.43244
1258	tyrT	0.194274	1.22826	1.55143	1.34347	1.53005	1.51914	1.50635	1.50505	1.50574	1.47286	1.50193	1.47982	1.43824	1.5185	1.65098	1.11037	1.58753	1.51977	1.57858	1.5172	1.55084	1.50688	1.51765	1.35043	1.42001	1.47715	1.51084	1.22831	1.23348	1.54626	1.42252	1.52715	1.54174	1.59041	1.57228	1.41429	0	1.19854	1.40116	1.17386	1.33271	1.51882	1.51388	1.51589	1.44471
1259	purU	0	0	0	0	0	0	0	0	0	0	0	0	0	0	0	0	0	0	0	0	0	0	0	0	0	0	0	0	0	0	0	0	0	0	0	0	1.28568	0	0	0	0	0	0	0	0
1260	ychJ	0	0.758393	0.769081	0.725962	0.521837	0.811084	0.814533	0.802889	0.814596	0.903663	0.86541	0.807262	0.845303	0.805321	0.583756	0.563497	0	0.81681	0.82329	0.793676	0.775847	0.700935	0.570655	0.732911	0.704952	0.791829	0.625258	0.292971	0	0.672064	0.68375	0.750507	0.694022	0.630249	0.766718	0.905691	0.551658	0.999712	0.962032	1.39281	0.893844	0.808207	0.763858	0.781872	0.719874
1261	rssA	0.112422	0.196291	0.123718	0.225407	0.312284	0.1672	0.173797	0.167194	0.122235	0.0430901	0	0	0	0.163932	0.260579	0	0.364276	0.170447	0.16402	0.15733	0.139849	0.104743	0.109738	0.124773	0.0672438	0.175503	0	0.089168	0.508736	0.332435	0.383118	0.132837	0.0934525	0.296713	0.131943	0	0.558509	0.394505	0.321881	0.0413511	0.236422	0.165569	0.140422	0.150637	0.143313
1262	rssB	0.331816	1.2635	1.16201	0.973125	0.963435	1.29913	1.20495	1.19599	1.24237	1.11332	1.07836	1.15474	1.11942	1.2947	1.12884	1.0731	0.939206	1.30354	1.21046	1.28574	1.27141	1.21438	1.22887	1.23957	0.571452	1.22886	1.29356	1.05186	1.28005	1.29583	0.38558	1.09843	1.20844	1.35988	1.16693	1.23515	0.718442	1.09415	1.12229	1.04428	0.996482	1.29692	1.26279	1.27666	0.993842
1263	galU	-0.0317538	0.314755	0.440623	0.803584	0.309631	0.343143	0.506659	0.49387	0.564262	0.372563	0.143867	0	0.0999454	0.336813	0.47312	0	0.11251	0.349431	0.508905	0.324023	0.300756	0.222163	0.111425	0.027379	1.15016	0.233503	0.193029	0	0	0.423596	1.9527	0.526087	0.210885	0.214256	0.446771	0.257709	1.08845	0.370385	0.344313	0.533441	0.699726	0.339983	0.291273	0.311059	0.450809
1264	hns	-0.715022	0	0	0	-0.0518024	0	0	0	-0.00629645	0.948296	1.4808	2.01773	1.21259	0	0	-0.188062	-0.140157	0	0	0	0	0	0.576531	-0.348448	0.144669	-0.164435	-0.460473	-1.00206	-0.0672658	0	0	0	0	0	0	0	0	0	0	0	0	0	0	0	-0.0597741
[truncated: 3,245 more rows]

## Sheet: Planktonic_assays2
	z	NoPhageControl	T7_phage 62.5 MOI	T7_phage 6.25 MOI	T7_phage 0.625 MOI	T7_phage 0.0625 MOI	T7_phage 0.00625 MOI	NoPhageControl	P1_phage 218.75 MOI	P1_phage 21.875 MOI	P1_phage 0.21875 MOI	P1_phage 0.021875 MOI
[truncated: 4,509 more rows]

[truncated: 3 more sheets: Solid Plate assays, High_fitness_scores, Fig 4A]
