# Supplementary material for: High-throughput mapping of the phage resistance landscape in E. coli
Source: PLoS Biol. 2020 Oct 13;18(10):e3000877. doi: 10.1371/journal.pbio.3000877 (PMC7553319; doi:10.1371/journal.pbio.3000877)
Supplement: S6 Table — RNA-seq, RNA sequencing. (XLSX) [file pbio.3000877.s014.xlsx]

## Sheet: Overview of StringTie Results
S6 Table
Overview of Sheets	Description
BW25113_wt Triplicate 1	This sheet describes gene expression levels from the StringTie assembler for 1 of 3 replicates of RNA-seq for wildtype BW25113 . High effect size differential expression results are located in Supplementary Table 12.
BW25113_wt Triplicate 2	This sheet describes gene expression levels from the StringTie assembler for 1 of 3 replicates of RNA-seq for wildtype BW25113 . High effect size differential expression results are located in Supplementary Table 12.
BW25113_wt Triplicate 3	This sheet describes gene expression levels from the StringTie assembler for 1 of 3 replicates of RNA-seq for wildtype BW25113 . High effect size differential expression results are located in Supplementary Table 12.
ASKA ygbE 1mM IPTG Triplicate 1	This sheet describes gene expression levels from the StringTie assembler for 1 of 3 replicates of RNA-seq for wildtype BW25113 + ygbE overexpression ASKA plasmid induced with 1mM IPTG. High effect size differential expression results are located in Supplementary Table 12.
ASKA ygbE 1mM IPTG Triplicate 2	This sheet describes gene expression levels from the StringTie assembler for 1 of 3 replicates of RNA-seq for wildtype BW25113 + ygbE overexpression ASKA plasmid induced with 1mM IPTG. High effect size differential expression results are located in Supplementary Table 12.
ASKA ygbE 1mM IPTG Triplicate 3	This sheet describes gene expression levels from the StringTie assembler for 1 of 3 replicates of RNA-seq for wildtype BW25113 + ygbE overexpression ASKA plasmid induced with 1mM IPTG. High effect size differential expression results are located in Supplementary Table 12.
ASKA yahA 1mM IPTG Triplicate 1	This sheet describes gene expression levels from the StringTie assembler for 1 of 3 replicates of RNA-seq for wildtype BW25113 + yahA (pdeL) overexpression ASKA plasmid induced with 1mM IPTG. High effect size differential expression results are located in Supplementary Table 12.
ASKA yahA 1mM IPTG Triplicate 2	This sheet describes gene expression levels from the StringTie assembler for 1 of 3 replicates of RNA-seq for wildtype BW25113 + yahA (pdeL) overexpression ASKA plasmid induced with 1mM IPTG. High effect size differential expression results are located in Supplementary Table 12.
ASKA yahA 1mM IPTG Triplicate 3	This sheet describes gene expression levels from the StringTie assembler for 1 of 3 replicates of RNA-seq for wildtype BW25113 + yahA (pdeL) overexpression ASKA plasmid induced with 1mM IPTG. High effect size differential expression results are located in Supplementary Table 12.
yrfF_KO Triplicate 1	This sheet describes gene expression levels from the StringTie assembler for 1 of 3 replicates of RNA-seq for wildtype BW25113 with yrfF (igaA) disrupted. High effect size differential expression results are located in Supplementary Table 12.
yrfF_KO Triplicate 2	This sheet describes gene expression levels from the StringTie assembler for 1 of 3 replicates of RNA-seq for wildtype BW25113 with yrfF (igaA) disrupted. High effect size differential expression results are located in Supplementary Table 12.
yrfF_KO Triplicate 3	This sheet describes gene expression levels from the StringTie assembler for 1 of 3 replicates of RNA-seq for wildtype BW25113 with yrfF (igaA) disrupted. High effect size differential expression results are located in Supplementary Table 12.
BW25113_wt Solo	This sheet describes gene expression levels from the StringTie assembler for a N=1 replicate of RNA-seq for wildtype BW25113.
ASKA ygbE 1mM IPTG Solo	This sheet describes gene expression levels from the StringTie assembler for a N=1 replicate of RNA-seq for wildtype BW25113 + ygbE overexpression ASKA plasmid induced with 1mM IPTG.
ASKA pdeB 1mM IPTG Solo	This sheet describes gene expression levels from the StringTie assembler for a N=1 replicate of RNA-seq for wildtype BW25113 + pdeB overexpression ASKA plasmid induced with 1mM IPTG.
ASKA pdeC 1mM IPTG Solo	This sheet describes gene expression levels from the StringTie assembler for a N=1 replicate of RNA-seq for wildtype BW25113 + pdeC overexpression ASKA plasmid induced with 1mM IPTG.
ASKA pdeN 1mM IPTG Solo	This sheet describes gene expression levels from the StringTie assembler for a N=1 replicate of RNA-seq for wildtype BW25113 + pdeN overexpression ASKA plasmid induced with 1mM IPTG.
ASKA pdeO 1mM IPTG Solo	This sheet describes gene expression levels from the StringTie assembler for a N=1 replicate of RNA-seq for wildtype BW25113 + pdeO overexpression ASKA plasmid induced with 1mM IPTG.
yrfF_KO Solo	This sheet describes gene expression levels from the StringTie assembler for a N=1 replicate of RNA-seq for wildtype BW25113 with yrfF (igaA) disrupted.
new gene names	yrfF (igaA) pdeN(rtn); gmr (pdeR); yjcC (pdeC); dosP (pdeO); pdeL (yahA); pdeB (ylaB); pdeI (yliE); dgcJ (yeaJ); yhbJ(rapZ)

## Sheet: BW25113_wt Triplicate 1
# Description of Variables from the StringTie Manual
# Gene ID: The gene identifier comes from the reference annotation provided with the -G option.
# Gene Name: This field contains the gene name in the reference annotation provided with the -G option.
# Reference: Name of the reference sequence that was used in the alignment of the reads.
# Strand: '+' denotes that the gene is on the forward strand, '-' for the reverse strand.
# Start: Start position of the gene (1-based index).
# End: End position of the gene (1-based index).
# Coverage: Per-base coverage of the gene.
# FPKM: normalized expression level in FPKM units (see manual for additional details).
# TPM: normalized expression level in RPM units (see manual for additional details).
Gene ID	Gene Name	Reference	Strand	Start	End	Coverage	FPKM	TPM
gene-BW25113_0001	thrL	CP009273.1	+	190	255	356.591	73.933	50.931
gene-BW25113_0002	thrA	CP009273.1	+	337	2799	358.054	74.2363	51.14
gene-BW25113_0003	thrB	CP009273.1	+	2801	3733	382.678	79.3418	54.657
gene-BW25113_0004	thrC	CP009273.1	+	3734	5020	388.03	80.4514	55.4214
gene-BW25113_0005	yaaX	CP009273.1	+	5234	5530	134.717	27.9313	19.2413
gene-BW25113_0006	yaaA	CP009273.1	-	5683	6459	285.29	59.1499	40.7472
gene-BW25113_0007	yaaJ	CP009273.1	-	6529	7959	73.7561	15.2921	10.5344
gene-BW25113_0008	talB	CP009273.1	+	8238	9191	6249.41	1295.71	892.588
gene-BW25113_0009	mog	CP009273.1	+	9306	9893	531.803	110.26	75.956
gene-BW25113_0010	satP	CP009273.1	-	9928	10494	150.552	31.2144	21.503
gene-BW25113_0011	yaaW	CP009273.1	-	10643	11356	15.8151	3.27899	2.25883
gene-BW25113_0013	yaaI	CP009273.1	-	11382	11786	11.1037	2.30216	1.58591
gene-BW25113_0014	dnaK	CP009273.1	+	12163	14079	9257.97	1919.48	1322.29
gene-BW25113_0015	dnaJ	CP009273.1	+	14168	15298	2612.47	541.651	373.133
gene-BW25113_0016	insL1	CP009273.1	+	15445	16557	601.324	124.674	85.8856
gene-BW25113_0018	mokC	CP009273.1	-	16751	16960	57.9017	12.0049	8.26995
gene-BW25113_0019	nhaA	CP009273.1	+	17489	18655	221.297	45.8822	31.6073
gene-BW25113_0020	nhaR	CP009273.1	+	18715	19620	116.034	24.0577	16.5729
gene-BW25113_0021	insB1	CP009273.1	-	19811	20314	47.7407	9.8982	6.81868
gene-BW25113_0022	insA	CP009273.1	-	20233	20508	70.4622	14.6091	10.0639
gene-BW25113_0023	rpsT	CP009273.1	-	20815	21078	18958.3	3930.68	2707.77
gene-BW25113_0024	yaaY	CP009273.1	+	21181	21399	198.425	41.1399	28.3405
gene-BW25113_0025	ribF	CP009273.1	+	21407	22348	1188.77	246.471	169.789
gene-BW25113_0026	ileS	CP009273.1	+	22391	25207	1867.58	387.211	266.742
gene-BW25113_0027	lspA	CP009273.1	+	25207	25701	1209.23	250.713	172.712
gene-BW25113_0028	fkpB	CP009273.1	+	25826	26275	835.149	173.154	119.282
gene-BW25113_0029	ispH	CP009273.1	+	26277	27227	882.372	182.945	126.027
gene-BW25113_0030	rihC	CP009273.1	+	27293	28207	228.485	47.3725	32.634
gene-BW25113_0031	dapB	CP009273.1	+	28374	29195	477.184	98.9358	68.155
gene-BW25113_0032	carA	CP009273.1	+	29651	30799	99.0191	20.5299	14.1427
gene-BW25113_0033	carB	CP009273.1	+	30817	34038	105.554	21.8848	15.076
gene-BW25113_0034	caiF	CP009273.1	+	34300	34695	39.7247	8.23624	5.67379
gene-BW25113_0035	caiE	CP009273.1	-	34781	35371	17.0135	3.52746	2.43
gene-BW25113_0036	caiD	CP009273.1	-	35377	36162	6.9084	1.43234	0.986709
gene-BW25113_0037	caiC	CP009273.1	-	36271	37824	19.9408	4.13438	2.84809
gene-BW25113_0038	caiB	CP009273.1	-	37898	39115	23.766	4.92747	3.39444
gene-BW25113_0039	caiA	CP009273.1	-	39244	40386	38.4348	7.9688	5.48955
gene-BW25113_0040	caiT	CP009273.1	-	40417	41931	3.1769	0.658675	0.453748
gene-BW25113_0041	fixA	CP009273.1	+	42403	43173	8.81842	1.82835	1.25951
gene-BW25113_0042	fixB	CP009273.1	+	43188	44129	7.14437	1.48126	1.02041
gene-BW25113_0043	fixC	CP009273.1	+	44180	45466	4.66201	0.966586	0.665863
gene-BW25113_0044	fixX	CP009273.1	+	45463	45750	2.17708	0.451381	0.310947
gene-BW25113_0045	yaaU	CP009273.1	+	45807	47138	3.14715	0.652507	0.449499
gene-BW25113_0046	kefF	CP009273.1	+	47246	47776	27.755	5.75453	3.96418
gene-BW25113_0047	kefC	CP009273.1	+	47769	49631	37.7542	7.82768	5.39234
gene-BW25113_0048	folA	CP009273.1	+	49823	50302	735.504	152.494	105.05
gene-BW25113_0049	apaH	CP009273.1	-	50380	51222	291.942	60.5291	41.6973
gene-BW25113_0050	apaG	CP009273.1	-	51229	51606	966.214	200.328	138.002
gene-BW25113_0051	rsmA	CP009273.1	-	51609	52430	1352.77	280.473	193.213
gene-BW25113_0052	pdxA	CP009273.1	-	52427	53416	7.66986	1.59021	1.09547
gene-BW25113_0053	surA	CP009273.1	-	53416	54702	1598.81	331.486	228.354
gene-BW25113_0054	lptD	CP009273.1	-	54755	57109	1241.6	257.424	177.334
gene-BW25113_0055	djlA	CP009273.1	+	57364	58179	200.737	41.6192	28.6707
gene-BW25113_0058	rluA	CP009273.1	-	59687	60346	685.382	142.102	97.8914
gene-BW25113_0059	rapA	CP009273.1	-	60358	63264	619.961	128.538	88.5475
gene-BW25113_0060	polB	CP009273.1	-	63429	65780	72.1807	14.9654	10.3094
gene-BW25113_0061	araD	CP009273.1	-	65855	66532	4.63864	0.961742	0.662526
gene-BW25113_0064	araC	CP009273.1	+	66874	67752	148.314	30.7503	21.1833
gene-BW25113_0065	yabI	CP009273.1	+	67838	68602	123.805	25.6689	17.6828
gene-BW25113_0066	thiQ	CP009273.1	-	68716	69414	96.9325	20.0973	13.8446
gene-BW25113_0067	thiP	CP009273.1	-	69398	71008	44.0332	9.12951	6.28915
gene-BW25113_0068	thiB	CP009273.1	-	70984	71967	125.344	25.988	17.9026
gene-BW25113_0069	sgrR	CP009273.1	-	72131	73786	91.497	18.9703	13.0683
gene-BW25113_0070	setA	CP009273.1	+	74108	75286	60.1908	12.4795	8.59691
gene-BW25113_0071	leuD	CP009273.1	-	75335	75940	53.132	11.016	7.58871
gene-BW25113_0072	leuC	CP009273.1	-	75951	77351	43.1428	8.9449	6.16197
gene-BW25113_0073	leuB	CP009273.1	-	77354	78445	0.445722	0.092413	0.063661
gene-BW25113_0074	leuA	CP009273.1	-	78445	80016	35.3365	7.32642	5.04703
gene-BW25113_0075	leuL	CP009273.1	-	80109	80195	6.95402	1.4418	0.993226
gene-BW25113_0076	leuO	CP009273.1	+	80855	81799	14.5016	3.00665	2.07123
gene-BW25113_0077	ilvI	CP009273.1	+	82117	83841	56.1606	11.6439	8.02127
gene-BW25113_0078	ilvH	CP009273.1	+	83844	84335	45.435	9.42015	6.48936
gene-BW25113_0080	cra	CP009273.1	+	84515	85519	782.466	162.231	111.758
gene-BW25113_0081	mraZ	CP009273.1	+	86121	86579	1118.19	231.837	159.708
gene-BW25113_0082	rsmH	CP009273.1	+	86581	87522	787.958	163.369	112.542
gene-BW25113_0083	ftsL	CP009273.1	+	87519	87884	726.948	150.72	103.828
gene-BW25113_0084	ftsI	CP009273.1	+	87900	89666	351.62	72.9024	50.221
gene-BW25113_0085	murE	CP009273.1	+	89653	91140	692.427	143.563	98.8976
gene-BW25113_0086	murF	CP009273.1	+	91137	92495	718.765	149.024	102.659
gene-BW25113_0087	mraY	CP009273.1	+	92489	93571	659.907	136.82	94.2529
gene-BW25113_0088	murD	CP009273.1	+	93574	94890	693.8	143.847	99.0937
gene-BW25113_0089	ftsW	CP009273.1	+	94890	96134	528.778	109.633	75.524
gene-BW25113_0090	murG	CP009273.1	+	96131	97198	551.987	114.445	78.8389
gene-BW25113_0091	murC	CP009273.1	+	97252	98727	807.182	167.355	115.288
gene-BW25113_0092	ddlB	CP009273.1	+	98720	99640	1165.83	241.715	166.513
gene-BW25113_0093	ftsQ	CP009273.1	+	99642	100472	767.278	159.082	109.588
gene-BW25113_0094	ftsA	CP009273.1	+	100469	101731	970.602	201.237	138.629
gene-BW25113_0095	ftsZ	CP009273.1	+	101792	102943	1826.12	378.615	260.82
gene-BW25113_0096	lpxC	CP009273.1	+	103044	103961	5090.31	1055.39	727.037
gene-BW25113_0097	secM	CP009273.1	+	104192	104704	803.201	166.53	114.719
gene-BW25113_0098	secA	CP009273.1	+	104766	107471	1363.68	282.735	194.771
gene-BW25113_0099	mutT	CP009273.1	+	107531	107920	243.3	50.444	34.7499
gene-BW25113_0101	yacG	CP009273.1	-	108136	108333	432.545	89.6808	61.7794
gene-BW25113_0102	zapD	CP009273.1	-	108343	109086	276.494	57.3262	39.4909
gene-BW25113_0103	coaE	CP009273.1	-	109086	109706	138.137	28.6404	19.7298
gene-BW25113_0104	guaC	CP009273.1	+	109931	110974	620.632	128.677	88.6433
gene-BW25113_0106	hofC	CP009273.1	-	111009	112211	21.3292	4.42224	3.04639
gene-BW25113_0107	hofB	CP009273.1	-	112201	113586	17.7374	3.67754	2.53338
gene-BW25113_0108	ppdD	CP009273.1	-	113596	114036	4.4898	0.930882	0.641266
gene-BW25113_0109	nadC	CP009273.1	-	114239	115132	290.886	60.3102	41.5465
gene-BW25113_0110	ampD	CP009273.1	+	115220	115771	165.761	34.3677	23.6752
gene-BW25113_0111	ampE	CP009273.1	+	115768	116622	122.988	25.4994	17.566
gene-BW25113_0112	aroP	CP009273.1	-	116665	118038	129.041	26.7544	18.4306
gene-BW25113_0113	pdhR	CP009273.1	+	118579	119343	903.012	187.224	128.975
gene-BW25113_0114	aceE	CP009273.1	+	119504	122167	14000.2	2902.69	1999.61
gene-BW25113_0115	aceF	CP009273.1	+	122182	124074	15672.1	3249.33	2238.4
gene-BW25113_0116	lpd	CP009273.1	+	124399	125823	12828	2659.65	1832.18
gene-BW25113_0117	yacH	CP009273.1	-	125894	127747	24.1564	5.00842	3.4502
gene-BW25113_0118	acnB	CP009273.1	+	128102	130699	2837.96	588.402	405.339
gene-BW25113_0119	yacL	CP009273.1	+	130875	131237	679.438	140.87	97.0424
gene-BW25113_0120	speD	CP009273.1	-	131275	132069	2673.71	554.347	381.879
gene-BW25113_0121	speE	CP009273.1	-	132085	132951	2201.03	456.345	314.367
gene-BW25113_0122	yacC	CP009273.1	-	133057	133404	409.488	84.9004	58.4862
gene-BW25113_0123	cueO	CP009273.1	+	133570	135120	75.8975	15.736	10.8402
gene-BW25113_0124	gcd	CP009273.1	-	135322	137712	331.313	68.692	47.3206
gene-BW25113_0125	hpt	CP009273.1	+	137918	138454	2041.17	423.201	291.535
gene-BW25113_0126	can	CP009273.1	-	138495	139157	2111.41	437.765	301.568
gene-BW25113_0127	yadG	CP009273.1	+	139266	140192	450.753	93.4558	64.3799
gene-BW25113_0128	yadH	CP009273.1	+	140189	140959	353.698	73.3332	50.5178
gene-BW25113_0129	yadI	CP009273.1	+	141064	141504	279.444	57.938	39.9124
gene-BW25113_0130	yadE	CP009273.1	+	141568	142797	63.8406	13.2363	9.1182
gene-BW25113_0131	panD	CP009273.1	-	142801	143181	1571.61	325.847	224.47
gene-BW25113_0132	yadD	CP009273.1	+	143455	144357	71.2713	14.7769	10.1795
gene-BW25113_0133	panC	CP009273.1	-	144431	145282	1029.48	213.446	147.039
gene-BW25113_0134	panB	CP009273.1	-	145294	146088	816.708	169.33	116.648
gene-BW25113_0135	yadC	CP009273.1	-	146202	147440	11.9492	2.47745	1.70667
gene-BW25113_0136	yadK	CP009273.1	-	147490	148086	4.69179	0.972762	0.670117
gene-BW25113_0137	yadL	CP009273.1	-	148113	148718	6.33003	1.31242	0.904103
gene-BW25113_0138	yadM	CP009273.1	-	148730	149299	5.04386	1.04576	0.720402
gene-BW25113_0139	htrE	CP009273.1	-	149316	151913	5.52117	1.14472	0.788575
gene-BW25113_0140	yadV	CP009273.1	-	151948	152688	9.31849	1.93203	1.33094
gene-BW25113_0141	yadN	CP009273.1	-	152786	153370	9.3641	1.94148	1.33745
gene-BW25113_0142	folK	CP009273.1	-	153740	154219	257.165	53.3187	36.7302
gene-BW25113_0143	pcnB	CP009273.1	-	154216	155613	931.134	193.055	132.992
gene-BW25113_0144	gluQ	CP009273.1	-	155673	156599	183.389	38.0226	26.1931
gene-BW25113_0145	dksA	CP009273.1	-	156636	157091	10365.4	2149.09	1480.47
gene-BW25113_0146	sfsA	CP009273.1	-	157269	157973	436.684	90.5388	62.3704
gene-BW25113_0147	ligT	CP009273.1	-	157988	158518	113.045	23.4379	16.1459
gene-BW25113_0148	hrpB	CP009273.1	+	158592	161021	119.081	24.6894	17.008
gene-BW25113_0149	mrcB	CP009273.1	+	161217	163751	281.367	58.3366	40.1869
gene-BW25113_0150	fhuA	CP009273.1	+	163971	166214	1975.41	409.566	282.142
gene-BW25113_0151	fhuC	CP009273.1	+	166265	167062	402.119	83.3724	57.4336
gene-BW25113_0152	fhuD	CP009273.1	+	167062	167952	295.457	61.2579	42.1994
gene-BW25113_0153	fhuB	CP009273.1	+	167949	169931	194.691	40.3658	27.8072
gene-BW25113_0154	hemL	CP009273.1	-	170089	171369	818.123	169.624	116.851
gene-BW25113_0155	clcA	CP009273.1	+	171594	173015	114.601	23.7606	16.3682
gene-BW25113_0156	erpA	CP009273.1	+	173097	173441	1070.38	221.925	152.88
gene-BW25113_0157	yadS	CP009273.1	-	173488	174111	170.136	35.2748	24.3001
gene-BW25113_0158	btuF	CP009273.1	-	174149	174949	210.412	43.6253	30.0526
gene-BW25113_0159	mtn	CP009273.1	-	174942	175640	1158.31	240.155	165.438
gene-BW25113_0160	dgt	CP009273.1	+	175724	177241	114.511	23.7419	16.3553
gene-BW25113_0161	degP	CP009273.1	+	177371	178795	255.468	52.9669	36.4879
gene-BW25113_0162	cdaR	CP009273.1	+	178950	180107	139.27	28.8753	19.8916
gene-BW25113_0163	yaeH	CP009273.1	-	180196	180582	552.367	114.524	78.8932
gene-BW25113_0164	yaeI	CP009273.1	-	180744	181556	58.5978	12.1492	8.36937
gene-BW25113_0166	dapD	CP009273.1	-	181610	182434	2015.48	417.875	287.866
gene-BW25113_0167	glnD	CP009273.1	-	182465	185137	115.669	23.982	16.5208
gene-BW25113_0168	map	CP009273.1	-	185199	185993	2526.79	523.887	360.896
gene-BW25113_0169	rpsB	CP009273.1	+	186361	187086	45641.7	9463.01	6518.88
gene-BW25113_0170	tsf	CP009273.1	+	187344	188195	14924.1	3094.25	2131.57
gene-BW25113_0171	pyrH	CP009273.1	+	188342	189067	1824.21	378.219	260.547
gene-BW25113_0172	frr	CP009273.1	+	189359	189916	6528.26	1353.52	932.416
gene-BW25113_0173	dxr	CP009273.1	+	190008	191204	364.177	75.5058	52.0145
gene-BW25113_0174	ispU	CP009273.1	+	191390	192151	1507.06	312.463	215.25
gene-BW25113_0175	cdsA	CP009273.1	+	192164	193021	1116.91	231.572	159.526
gene-BW25113_0176	rseP	CP009273.1	+	193033	194385	1376.78	285.451	196.642
gene-BW25113_0177	bamA	CP009273.1	+	194415	196847	2550.88	528.882	364.336
gene-BW25113_0178	skp	CP009273.1	+	196969	197454	5174.79	1072.9	739.102
gene-BW25113_0179	lpxD	CP009273.1	+	197458	198483	3686.9	764.414	526.59
gene-BW25113_0180	fabZ	CP009273.1	+	198588	199043	5065.59	1050.26	723.506
gene-BW25113_0181	lpxA	CP009273.1	+	199047	199835	4577.24	949.011	653.755
gene-BW25113_0182	lpxB	CP009273.1	+	199835	200983	579.146	120.076	82.7179
gene-BW25113_0183	rnhB	CP009273.1	+	200980	201576	468.435	97.1219	66.9054
gene-BW25113_0184	dnaE	CP009273.1	+	201613	205095	736.072	152.612	105.131
gene-BW25113_0185	accA	CP009273.1	+	205108	206067	2685.26	556.742	383.529
gene-BW25113_0186	ldcC	CP009273.1	+	206166	208307	64.5131	13.3757	9.21424
gene-BW25113_0187	yaeR	CP009273.1	+	208364	208753	184.864	38.3284	26.4037
gene-BW25113_0188	tilS	CP009273.1	+	208818	210116	147.291	30.5382	21.0372
gene-BW25113_0189	rof	CP009273.1	-	210165	210419	419.952	87.0698	59.9807
gene-BW25113_0190	yaeQ	CP009273.1	+	210778	211323	351.808	72.9414	50.2479
gene-BW25113_0191	arfB	CP009273.1	+	211320	211742	293.864	60.9277	41.9719
gene-BW25113_0192	nlpE	CP009273.1	+	211756	212466	236.141	48.9597	33.7274
gene-BW25113_0193	yaeF	CP009273.1	-	212666	213490	39.9794	8.28904	5.71016
gene-BW25113_0194	proS	CP009273.1	-	213544	215262	1970.05	408.456	281.377
gene-BW25113_0195	tsaA	CP009273.1	-	215374	216081	237.481	49.2376	33.9188
gene-BW25113_0196	rcsF	CP009273.1	-	216078	216482	498.038	103.26	71.1335
gene-BW25113_0197	metQ	CP009273.1	-	216600	217415	694.966	144.089	99.2602
gene-BW25113_0198	metI	CP009273.1	-	217455	218108	302.014	62.6174	43.1359
gene-BW25113_0199	metN	CP009273.1	-	218101	219132	261.197	54.1548	37.3062
gene-BW25113_0200	gmhB	CP009273.1	+	219320	219895	467.936	97.0184	66.8341
gene-BW25113_0201	rrsH	CP009273.1	+	220258	221799	1177.43	244.12	168.17
gene-BW25113_0202	ileV	CP009273.1	+	221868	221944	814.241	168.819	116.296
gene-BW25113_0203	alaV	CP009273.1	+	221987	222062	481.033	99.7339	68.7047
gene-BW25113_0204	rrlH	CP009273.1	+	222246	225149	4652.85	964.688	664.555
gene-BW25113_0205	rrfH	CP009273.1	+	225243	225362	1.57875	0.327327	0.225489
gene-BW25113_0206	aspU	CP009273.1	+	225415	225491	8.01948	1.6627	1.1454
gene-BW25113_0207	dkgB	CP009273.1	+	225654	226457	69.4453	14.3983	9.91869
gene-BW25113_0208	yafC	CP009273.1	-	226454	227368	121.2	25.1287	17.3107
gene-BW25113_0209	yafD	CP009273.1	+	227609	228409	219.141	45.4351	31.2994
gene-BW25113_0210	yafE	CP009273.1	+	228413	229036	52.8558	10.9587	7.54926
gene-BW25113_0211	mltD	CP009273.1	-	229084	230442	417.523	86.5662	59.6338
gene-BW25113_0212	gloB	CP009273.1	-	230514	231269	102.566	21.2653	14.6493
gene-BW25113_0213	yafS	CP009273.1	+	231303	232025	151.415	31.3933	21.6262
gene-BW25113_0214	rnhA	CP009273.1	-	232022	232489	290.686	60.2687	41.5179
gene-BW25113_0215	dnaQ	CP009273.1	+	232554	233285	216.892	44.9688	30.9782
gene-BW25113_0216	aspV	CP009273.1	+	233418	233494	48.1688	9.98697	6.87983
gene-BW25113_0217	yafT	CP009273.1	+	233822	234607	29.3015	6.07517	4.18506
gene-BW25113_0218	yafU	CP009273.1	-	235233	235589	8.33894	1.72893	1.19103
gene-BW25113_0219	yafV	CP009273.1	-	235906	236676	129.411	26.8312	18.4835
gene-BW25113_0220	ivy	CP009273.1	+	236830	237303	185.578	38.4764	26.5056
gene-BW25113_0221	fadE	CP009273.1	-	237346	239790	20.746	4.30133	2.9631
gene-BW25113_0222	gmhA	CP009273.1	+	240030	240608	1264.43	262.158	180.595
gene-BW25113_0223	yafJ	CP009273.1	+	240814	241581	371.302	76.9831	53.0321
gene-BW25113_0224	yafK	CP009273.1	-	241552	242292	509.822	105.703	72.8166
gene-BW25113_0225	yafQ	CP009273.1	-	242448	242726	146.559	30.3865	20.9327
gene-BW25113_0226	dinJ	CP009273.1	-	242729	242989	325.103	67.4046	46.4337
gene-BW25113_0227	yafL	CP009273.1	+	243199	243948	7.92267	1.64263	1.13157
gene-BW25113_0228	rayT	CP009273.1	+	244124	244621	77.261	16.0187	11.035
gene-BW25113_0229	lfhA	CP009273.1	-	244845	246557	6.108	1.26639	0.87239
gene-BW25113_0230	lafU	CP009273.1	+	246559	247314	9.47884	1.96527	1.35384
gene-BW25113_0231	dinB	CP009273.1	+	247385	248440	43.4782	9.01446	6.20988
gene-BW25113_0232	yafN	CP009273.1	+	248492	248785	78.6939	16.3158	11.2396
gene-BW25113_0233	yafO	CP009273.1	+	248788	249186	55.1754	11.4397	7.88057
gene-BW25113_0234	yafP	CP009273.1	+	249196	249648	22.7461	4.71602	3.24877
gene-BW25113_0235	ykfJ	CP009273.1	+	249966	250172	1.88406	0.390627	0.269095
gene-BW25113_0236	prfH	CP009273.1	+	250189	250689	23.1896	4.80797	3.31211
gene-BW25113_0237	pepD	CP009273.1	-	250746	252203	1816.98	376.719	259.515
gene-BW25113_0238	gpt	CP009273.1	+	252464	252922	628.336	130.275	89.7436
gene-BW25113_0239	frsA	CP009273.1	+	253014	254258	181.329	37.5955	25.8988
gene-BW25113_0240	crl	CP009273.1	+	254316	254717	2052.67	425.586	293.178
gene-BW25113_0241	phoE	CP009273.1	-	254756	255811	25.5511	5.29759	3.6494
gene-BW25113_0242	proB	CP009273.1	+	256099	257202	676.04	140.165	96.5571
gene-BW25113_0243	proA	CP009273.1	+	257214	258467	691.727	143.418	98.7976
gene-BW25113_0244	thrW	CP009273.1	+	258582	258657	197.882	41.0273	28.2629
gene-BW25113_0245	ykfI	CP009273.1	-	259039	259380	82.424	17.0892	11.7724
gene-BW25113_0246	yafW	CP009273.1	-	259401	259718	65.0849	13.4942	9.29591
gene-BW25113_0247	ykfG	CP009273.1	-	259967	260443	25.6436	5.31676	3.66261
gene-BW25113_0248	yafX	CP009273.1	-	260459	260917	84.5686	17.5338	12.0787
gene-BW25113_0249	ykfF	CP009273.1	-	261015	261254	98.0833	20.3359	14.009
gene-BW25113_0250	ykfB	CP009273.1	-	261331	261798	108.051	22.4026	15.4327
gene-BW25113_0251	yafY	CP009273.1	-	261821	262264	48.7869	10.1151	6.96811
gene-BW25113_0252	yafZ	CP009273.1	-	262895	263716	15.6302	3.24065	2.23242
gene-BW25113_0253	ykfA	CP009273.1	-	263808	264671	40.8426	8.468	5.83345
gene-BW25113_0254	perR	CP009273.1	-	265000	265893	25.934	5.37697	3.70409
gene-BW25113_0256	insI1	CP009273.1	+	266314	267465	109.637	22.7314	15.6592
gene-BW25113_0258	ykfC	CP009273.1	+	268558	269665	40.7265	8.44394	5.81687
gene-BW25113_0259	insH1	CP009273.1	-	269812	270828	545.107	113.019	77.8563
gene-BW25113_0260	mmuP	CP009273.1	+	271036	272439	15.9461	3.30616	2.27755
gene-BW25113_0261	mmuM	CP009273.1	+	272426	273358	97.8774	20.2932	13.9796
gene-BW25113_0262	afuC	CP009273.1	-	273467	274513	13.6323	2.82642	1.94707
gene-BW25113_0263	afuB	CP009273.1	-	274525	274872	10.0747	2.08882	1.43895
gene-BW25113_0264	insB1	CP009273.1	-	274889	275392	43.2064	8.9581	6.17106
gene-BW25113_0265	insA	CP009273.1	-	275311	275586	52.6251	10.9109	7.51631
gene-BW25113_0266	yagB	CP009273.1	-	276138	276446	74.7832	15.505	10.6811
gene-BW25113_0267	yagA	CP009273.1	-	276540	277694	3.38268	0.701341	0.48314
gene-BW25113_0268	yagE	CP009273.1	+	277989	278897	482.772	100.094	68.9532
gene-BW25113_0269	yagF	CP009273.1	+	278912	280879	255.428	52.9587	36.4822
gene-BW25113_0270	yagG	CP009273.1	+	281106	282488	16.9118	3.50637	2.41547
gene-BW25113_0271	yagH	CP009273.1	+	282500	284110	21.401	4.43713	3.05665
gene-BW25113_0272	yagI	CP009273.1	-	284115	284873	93.6706	19.421	13.3787
gene-BW25113_0273	argF	CP009273.1	-	285012	286016	29.3453	6.08423	4.19131
gene-BW25113_0274	insB1	CP009273.1	-	286360	286863	60.0641	12.4533	8.57881
gene-BW25113_0275	insA	CP009273.1	-	286782	287057	42.2995	8.77007	6.04153
gene-BW25113_0276	yagJ	CP009273.1	+	287115	287942	44.8466	9.29817	6.40533
gene-BW25113_0277	yagK	CP009273.1	-	288033	288659	34.6108	7.17596	4.94338
gene-BW25113_0278	yagL	CP009273.1	-	288931	289629	22.9785	4.7642	3.28197
gene-BW25113_0279	yagM	CP009273.1	-	289656	290510	10.9754	2.27557	1.56759
gene-BW25113_0280	yagN	CP009273.1	-	290850	291290	465.667	96.5479	66.51
gene-BW25113_0281	intF	CP009273.1	-	291407	292807	101.34	21.011	14.4741
gene-BW25113_0283	paoD	CP009273.1	-	293481	294437	8.14119	1.68794	1.16279
gene-BW25113_0284	paoC	CP009273.1	-	294447	296645	5.32305	1.10364	0.760278
gene-BW25113_0285	paoB	CP009273.1	-	296642	297598	4.17515	0.865645	0.596326
gene-BW25113_0286	paoA	CP009273.1	-	297595	298284	3.76522	0.780653	0.537777
gene-BW25113_0287	yagU	CP009273.1	+	298702	299316	424.115	87.933	60.5753
gene-BW25113_0288	ykgJ	CP009273.1	-	299564	299893	19.4606	4.03482	2.77951
gene-BW25113_0289	ecpE	CP009273.1	-	300206	300916	13.3701	2.77206	1.90962
gene-BW25113_0290	ecpD	CP009273.1	-	300885	302528	20.6126	4.27368	2.94405
gene-BW25113_0291	ecpC	CP009273.1	-	302518	305043	7.97096	1.65264	1.13847
gene-BW25113_0292	ecpB	CP009273.1	-	305069	305737	5.80568	1.20371	0.829211
gene-BW25113_0293	ecpA	CP009273.1	-	305795	306382	29.8112	6.18084	4.25786
gene-BW25113_0294	ecpR	CP009273.1	-	306457	307047	4.3824	0.908615	0.625927
gene-BW25113_0295	ykgL	CP009273.1	+	307823	308050	36.6667	7.6022	5.23701
gene-BW25113_0296	ykgM	CP009273.1	-	308225	308488	60.1319	12.4673	8.58849
gene-BW25113_0297	eaeH	CP009273.1	+	310068	310939	1.43807	0.29816	0.205396
gene-BW25113_0298	insE1	CP009273.1	+	311002	311301	42.6681	8.8465	6.09418
gene-BW25113_0299	insF1	CP009273.1	+	311298	312164	27.5748	5.71715	3.93843
gene-BW25113_0300	ykgA	CP009273.1	-	312197	312880	23.8406	4.94294	3.4051
gene-BW25113_0301	rclC	CP009273.1	-	313437	314030	8.37037	1.73545	1.19552
gene-BW25113_0303	rclB	CP009273.1	-	314042	314278	15.4304	3.19922	2.20388
gene-BW25113_0304	rclA	CP009273.1	-	314387	315712	4.25339	0.881868	0.607502
gene-BW25113_0305	rclR	CP009273.1	+	315938	316792	14.552	3.01711	2.07843
gene-BW25113_0306	ykgE	CP009273.1	+	317319	318038	102.925	21.3397	14.7005
gene-BW25113_0307	ykgF	CP009273.1	+	318049	319476	59.9393	12.4274	8.56098
gene-BW25113_0308	ykgG	CP009273.1	+	319469	320164	59.955	12.4306	8.56322
gene-BW25113_0310	ykgH	CP009273.1	-	320407	321075	8.13752	1.68717	1.16226
gene-BW25113_0311	betA	CP009273.1	-	321288	322958	199.68	41.4003	28.5199
gene-BW25113_0312	betB	CP009273.1	-	322972	324444	281.163	58.2943	40.1578
gene-BW25113_0313	betI	CP009273.1	-	324458	325045	347.563	72.0612	49.6415
gene-BW25113_0314	betT	CP009273.1	+	325174	327207	161.066	33.3943	23.0047
gene-BW25113_0315	yahA	CP009273.1	+	328082	329170	58.6575	12.1616	8.3779
gene-BW25113_0316	yahB	CP009273.1	-	329212	330144	88.5938	18.3684	12.6536
gene-BW25113_0317	yahC	CP009273.1	-	330236	330733	6.00602	1.24524	0.857825
gene-BW25113_0318	yahD	CP009273.1	+	330991	331596	17.2954	3.5859	2.47026
gene-BW25113_0319	yahE	CP009273.1	+	331636	332499	4.64429	0.962913	0.663332
gene-BW25113_0320	yahF	CP009273.1	+	332489	334036	0.92664	0.192123	0.13235
gene-BW25113_0321	yahG	CP009273.1	+	334036	335454	5.93836	1.23122	0.848162
gene-BW25113_0323	yahI	CP009273.1	+	335876	336826	7.66772	1.58977	1.09516
gene-BW25113_0324	yahJ	CP009273.1	+	336836	338218	41.3174	8.56645	5.90126
gene-BW25113_0325	yahK	CP009273.1	+	338595	339644	25.1371	5.21175	3.59028
gene-BW25113_0326	yahL	CP009273.1	+	339887	340702	1.36152	0.282288	0.194462
gene-BW25113_0327	yahM	CP009273.1	+	341115	341360	52.3537	10.8546	7.47754
gene-BW25113_0328	yahN	CP009273.1	-	341377	342048	96.2902	19.9641	13.7529
gene-BW25113_0329	yahO	CP009273.1	+	342195	342470	38.4529	7.97254	5.49213
gene-BW25113_0330	prpR	CP009273.1	-	342568	344154	6.48897	1.34538	0.926804
gene-BW25113_0331	prpB	CP009273.1	+	344393	345283	6.84512	1.41922	0.977671
gene-BW25113_0333	prpC	CP009273.1	+	345723	346892	6.03333	1.25091	0.861726
gene-BW25113_0334	prpD	CP009273.1	+	346926	348377	3.94766	0.818479	0.563834
gene-BW25113_0335	prpE	CP009273.1	+	348417	350303	6.7133	1.39189	0.958844
gene-BW25113_0336	codB	CP009273.1	+	350633	351892	34.3245	7.11659	4.90248
gene-BW25113_0337	codA	CP009273.1	+	351882	353165	116.879	24.2329	16.6936
gene-BW25113_0338	cynR	CP009273.1	-	353502	354401	31.6533	6.56277	4.52097
gene-BW25113_0339	cynT	CP009273.1	+	354510	355169	14.697	3.04716	2.09913
gene-BW25113_0340	cynS	CP009273.1	+	355200	355670	13.2208	2.74111	1.8883
gene-BW25113_0341	cynX	CP009273.1	+	355703	356857	9.65801	2.00242	1.37943
gene-BW25113_0342	lacA	CP009273.1	-	356960	357571	7.6732	1.59091	1.09594
gene-BW25113_0343	lacY	CP009273.1	-	357637	358890	5.2193	1.08213	0.745459
gene-BW25113_0344	lacZ	CP009273.1	-	358942	360066	3.024	0.626974	0.43191
gene-BW25113_0345	lacI	CP009273.1	-	360661	361743	136.55	28.3113	19.5031
gene-BW25113_0346	mhpR	CP009273.1	-	361820	362653	57.5012	11.9219	8.21275
gene-BW25113_0347	mhpA	CP009273.1	+	362844	364508	3.72192	0.771676	0.531593
gene-BW25113_0348	mhpB	CP009273.1	+	364510	365454	3.2582	0.675532	0.465361
gene-BW25113_0349	mhpC	CP009273.1	+	365457	367561	50.536	10.4778	7.21793
gene-BW25113_0350	mhpD	CP009273.1	+	367571	368380	105.362	21.8449	15.0486
gene-BW25113_0351	mhpF	CP009273.1	+	368377	369327	83.8603	17.387	11.9776
gene-BW25113_0352	mhpE	CP009273.1	+	369324	370337	66.9417	13.8792	9.56112
gene-BW25113_0353	mhpT	CP009273.1	+	370915	372126	22.1163	4.58544	3.15882
gene-BW25113_0354	yaiL	CP009273.1	+	372228	372767	407.096	84.4044	58.1445
gene-BW25113_0355	frmB	CP009273.1	-	372991	373824	472.638	97.9933	67.5057
gene-BW25113_0356	frmA	CP009273.1	-	373918	375027	748.765	155.243	106.944
gene-BW25113_0357	frmR	CP009273.1	-	375062	375337	887.67	184.043	126.784
gene-BW25113_0358	yaiO	CP009273.1	-	375525	376298	12.7571	2.64497	1.82207
gene-BW25113_0360	insC1	CP009273.1	+	376807	377172	104.068	21.5767	14.8638
gene-BW25113_0361	insD1	CP009273.1	+	377130	378035	53.6276	11.1187	7.65949
gene-BW25113_0363	yaiP	CP009273.1	-	378195	379391	5.67922	1.17749	0.811148
gene-BW25113_0364	yaiS	CP009273.1	-	379515	380072	4.6129	0.956406	0.658849
gene-BW25113_0365	tauA	CP009273.1	+	380688	381650	3.43406	0.711993	0.490478
gene-BW25113_0366	tauB	CP009273.1	+	381663	382430	5.15	1.06776	0.735562
gene-BW25113_0367	tauC	CP009273.1	+	382427	383254	3.38019	0.700825	0.482785
gene-BW25113_0368	tauD	CP009273.1	+	383251	384102	19.3592	4.01379	2.76502
gene-BW25113_0369	hemB	CP009273.1	-	384209	385183	608.045	126.068	86.8456
gene-BW25113_0372	insF1	CP009273.1	-	387195	388061	36.3043	7.52707	5.18525
gene-BW25113_0373	insE1	CP009273.1	-	388058	388357	80.6757	16.7267	11.5227
gene-BW25113_0375	yaiV	CP009273.1	+	389962	390585	13.3862	2.7754	1.91192
gene-BW25113_0376	ampH	CP009273.1	-	390586	391743	188.18	39.0158	26.8772
gene-BW25113_0377	sbmA	CP009273.1	+	392095	393315	74.6683	15.4812	10.6647
gene-BW25113_0378	yaiW	CP009273.1	+	393328	394422	115.11	23.866	16.4408
gene-BW25113_0379	yaiY	CP009273.1	-	394481	394789	17.9871	3.72931	2.56905
gene-BW25113_0380	yaiZ	CP009273.1	+	395049	395261	486.526	100.873	69.4893
gene-BW25113_0381	ddlA	CP009273.1	-	395285	396379	815.51	169.082	116.477
gene-BW25113_0382	iraP	CP009273.1	+	396842	397102	183.958	38.1405	26.2742
gene-BW25113_0383	phoA	CP009273.1	+	397203	398618	34.411	7.13453	4.91484
gene-BW25113_0384	psiF	CP009273.1	+	398737	399057	33.1464	6.87234	4.73422
gene-BW25113_0385	yaiC	CP009273.1	+	399159	400274	14.9579	3.10126	2.1364
gene-BW25113_0386	proC	CP009273.1	-	400291	401100	322.901	66.948	46.1192
gene-BW25113_0387	yaiI	CP009273.1	+	401220	401678	211.065	43.7608	30.1459
gene-BW25113_0388	aroL	CP009273.1	+	401861	402385	331.417	68.7136	47.3355
gene-BW25113_0389	yaiA	CP009273.1	+	402435	402626	290.219	60.1718	41.4512
gene-BW25113_0390	aroM	CP009273.1	+	402884	403561	138.606	28.7376	19.7968
gene-BW25113_0391	yaiE	CP009273.1	+	403633	403917	1048.12	217.309	149.7
gene-BW25113_0392	ykiA	CP009273.1	+	404065	404406	81.1901	16.8334	11.5962
gene-BW25113_0393	rdgC	CP009273.1	-	404564	405475	571.297	118.449	81.5969
gene-BW25113_0394	mak	CP009273.1	+	405600	406508	138.049	28.6222	19.7173
gene-BW25113_0396	araJ	CP009273.1	-	406753	407937	37.9089	7.85975	5.41443
gene-BW25113_0397	sbcC	CP009273.1	-	408063	411209	94.2619	19.5436	13.4632
gene-BW25113_0398	sbcD	CP009273.1	-	411206	412408	108.355	22.4656	15.4761
gene-BW25113_0399	phoB	CP009273.1	+	412598	413287	104.374	21.6401	14.9075
gene-BW25113_0400	phoR	CP009273.1	+	413345	414640	41.9583	8.69933	5.9928
gene-BW25113_0401	brnQ	CP009273.1	+	415047	416366	254.171	52.698	36.3026
gene-BW25113_0402	proY	CP009273.1	+	416442	417815	326.46	67.6858	46.6275
gene-BW25113_0403	malZ	CP009273.1	+	417974	419788	47.3554	9.81832	6.76365
gene-BW25113_0404	acpH	CP009273.1	-	419793	420374	73.6203	15.2639	10.515
gene-BW25113_0405	queA	CP009273.1	+	420467	421537	484.753	100.505	69.236
gene-BW25113_0406	tgt	CP009273.1	+	421593	422720	1698.44	352.142	242.583
gene-BW25113_0407	yajC	CP009273.1	+	422743	423075	4733.27	981.362	676.042
gene-BW25113_0408	secD	CP009273.1	+	423103	424950	2058.08	426.707	293.95
gene-BW25113_0409	secF	CP009273.1	+	424961	425932	1964.94	407.397	280.648
gene-BW25113_0410	yajD	CP009273.1	+	426061	426408	303.267	62.8772	43.3149
gene-BW25113_0411	tsx	CP009273.1	-	426585	427469	8240.7	1708.57	1177
gene-BW25113_0412	yajI	CP009273.1	-	427768	428307	35.2352	7.30541	5.03255
gene-BW25113_0413	nrdR	CP009273.1	+	428458	428907	813.256	168.614	116.155
gene-BW25113_0414	ribD	CP009273.1	+	428911	430014	546.393	113.285	78.04
gene-BW25113_0415	ribE	CP009273.1	+	430103	430573	1931.61	400.487	275.888
gene-BW25113_0416	nusB	CP009273.1	+	430593	431012	2679.24	555.494	382.669
gene-BW25113_0417	thiL	CP009273.1	+	431090	432067	307.18	63.6886	43.8738
gene-BW25113_0418	pgpA	CP009273.1	+	432045	432563	701.07	145.355	100.132
gene-BW25113_0419	yajO	CP009273.1	-	432617	433591	208.328	43.1932	29.755
gene-BW25113_0420	dxs	CP009273.1	-	433771	435633	581.175	120.497	83.0078
gene-BW25113_0421	ispA	CP009273.1	-	435658	436557	832.031	172.507	118.837
gene-BW25113_0422	xseB	CP009273.1	-	436557	436799	882.681	183.009	126.071
gene-BW25113_0423	thiI	CP009273.1	+	437005	438453	712.498	147.724	101.764
gene-BW25113_0424	yajL	CP009273.1	-	438507	439097	228.374	47.3494	32.6181
gene-BW25113_0425	panE	CP009273.1	-	439060	439971	227.501	47.1684	32.4934
gene-BW25113_0426	yajQ	CP009273.1	+	440139	440630	1788.15	370.741	255.396
gene-BW25113_0427	yajR	CP009273.1	-	440758	442122	109.226	22.6462	15.6005
gene-BW25113_0428	cyoE	CP009273.1	-	442271	443161	9686.46	2008.32	1383.49
gene-BW25113_0429	cyoD	CP009273.1	-	443173	443502	11221.2	2326.53	1602.7
gene-BW25113_0430	cyoC	CP009273.1	-	443502	444116	9288.36	1925.78	1326.63
gene-BW25113_0431	cyoB	CP009273.1	-	444106	446097	9658.84	2002.59	1379.55
gene-BW25113_0432	cyoA	CP009273.1	-	446119	447066	13975.8	2897.65	1996.13
gene-BW25113_0433	ampG	CP009273.1	-	447526	449001	319.192	66.1789	45.5894
gene-BW25113_0434	yajG	CP009273.1	-	449045	449623	1143.82	237.15	163.368
gene-BW25113_0435	bolA	CP009273.1	+	449928	450245	651.503	135.078	93.0526
gene-BW25113_0436	tig	CP009273.1	+	450589	451887	15945.5	3306.02	2277.46
gene-BW25113_0437	clpP	CP009273.1	+	452133	452756	2810.46	582.701	401.411
gene-BW25113_0438	clpX	CP009273.1	+	452882	454156	3250.08	673.847	464.2
gene-BW25113_0439	lon	CP009273.1	+	454344	456698	3870.03	802.384	552.747
gene-BW25113_0440	hupB	CP009273.1	+	456907	457179	11242.3	2330.89	1605.71
gene-BW25113_0441	ppiD	CP009273.1	+	457371	459242	1486.68	308.238	212.339
gene-BW25113_0442	ybaV	CP009273.1	+	459393	459764	94.3226	19.5562	13.4719
gene-BW25113_0443	fadM	CP009273.1	+	459858	460256	42.4687	8.80514	6.06569
gene-BW25113_0444	queC	CP009273.1	-	460308	461003	372.434	77.2177	53.1938
gene-BW25113_0445	ybaE	CP009273.1	-	461068	462768	69.2904	14.3662	9.89658
gene-BW25113_0446	cof	CP009273.1	+	462868	463686	78.9219	16.3631	11.2722
gene-BW25113_0447	ybaO	CP009273.1	+	463839	464297	136.558	28.3129	19.5042
gene-BW25113_0448	mdlA	CP009273.1	+	464327	466099	64.1549	13.3014	9.16309
gene-BW25113_0449	mdlB	CP009273.1	+	466092	467873	49.246	10.2103	7.03368
gene-BW25113_0450	glnK	CP009273.1	+	468054	468392	3.29203	0.682547	0.470193
gene-BW25113_0451	amtB	CP009273.1	+	468422	469708	29.7506	6.16827	4.2492
gene-BW25113_0452	tesB	CP009273.1	-	469757	470617	178.351	36.9779	25.4734
gene-BW25113_0453	ybaY	CP009273.1	+	470835	471407	121.993	25.2931	17.424
gene-BW25113_0454	ybaZ	CP009273.1	-	471438	471827	58.341	12.096	8.3327
gene-BW25113_0455	ffs	CP009273.1	+	471904	472017	21.3947	4.43583	3.05576
gene-BW25113_0456	ybaA	CP009273.1	+	472128	472481	46.839	9.71125	6.68989
gene-BW25113_0457	ylaB	CP009273.1	-	472523	474073	75.9433	15.7455	10.8468
gene-BW25113_0458	ylaC	CP009273.1	-	474237	474707	1000.55	207.447	142.906
gene-BW25113_0459	maa	CP009273.1	-	474823	475374	400.139	82.962	57.1509
gene-BW25113_0460	hha	CP009273.1	-	475546	475764	1067.63	221.354	152.486
gene-BW25113_0461	tomB	CP009273.1	-	475790	476164	347.547	72.0578	49.6392
gene-BW25113_0462	acrB	CP009273.1	-	476710	479859	1168.75	242.321	166.93
gene-BW25113_0463	acrA	CP009273.1	-	479882	481075	1133.53	235.018	161.9
gene-BW25113_0464	acrR	CP009273.1	+	481217	481864	265.636	55.075	37.9401
gene-BW25113_0465	mscK	CP009273.1	+	481992	485354	186.821	38.7341	26.6832
gene-BW25113_0466	ybaM	CP009273.1	-	485566	485727	120.228	24.9273	17.1719
gene-BW25113_0467	priC	CP009273.1	-	485741	486268	80.3826	16.6659	11.4808
gene-BW25113_0468	ybaN	CP009273.1	+	486338	486715	320.608	66.4726	45.7917
gene-BW25113_0469	apt	CP009273.1	+	486868	487419	1246.02	258.34	177.965
gene-BW25113_0470	dnaX	CP009273.1	+	487548	489479	593.136	122.976	84.7161
gene-BW25113_0471	ybaB	CP009273.1	+	489532	489861	2705.8	561	386.462
gene-BW25113_0472	recR	CP009273.1	+	489861	490466	1631.32	338.226	232.997
gene-BW25113_0473	htpG	CP009273.1	+	490576	492450	2416.17	500.95	345.095
gene-BW25113_0474	adk	CP009273.1	+	492631	493275	2929.54	607.39	418.419
gene-BW25113_0475	hemH	CP009273.1	+	493511	494473	142.977	29.6438	20.421
gene-BW25113_0476	aes	CP009273.1	-	494470	495429	32.7907	6.79858	4.68341
gene-BW25113_0477	gsk	CP009273.1	+	495581	496885	335.466	69.5531	47.9138
gene-BW25113_0478	ybaL	CP009273.1	-	497018	498694	330.494	68.5222	47.2036
gene-BW25113_0479	fsr	CP009273.1	-	498932	500152	76.5446	15.8702	10.9327
gene-BW25113_0480	ushA	CP009273.1	+	500370	502022	184.868	38.3291	26.4042
gene-BW25113_0481	ybaK	CP009273.1	-	502059	502538	145.348	30.1354	20.7597
gene-BW25113_0482	ybaP	CP009273.1	-	502742	503536	151.645	31.441	21.6591
gene-BW25113_0483	ybaQ	CP009273.1	+	503674	504015	606.81	125.812	86.6691
gene-BW25113_0484	copA	CP009273.1	-	504331	506835	70.4164	14.5996	10.0574
gene-BW25113_0485	glsA	CP009273.1	+	507097	508029	5.38907	1.11733	0.769707
gene-BW25113_0486	ybaT	CP009273.1	+	508032	509324	11.2459	2.33165	1.60623
gene-BW25113_0487	cueR	CP009273.1	+	509449	509856	121.988	25.2921	17.4232
gene-BW25113_0488	ybbJ	CP009273.1	-	509857	510315	105.649	21.9045	15.0896
gene-BW25113_0489	qmcA	CP009273.1	-	510312	511229	139.667	28.9575	19.9483
gene-BW25113_0490	fetA	CP009273.1	+	511375	512052	135.047	27.9996	19.2884
gene-BW25113_0491	fetB	CP009273.1	+	512039	512818	99.4143	20.6118	14.1991
gene-BW25113_0492	ybbN	CP009273.1	-	512881	513735	767.071	159.039	109.559
gene-BW25113_0493	ybbO	CP009273.1	-	513796	514605	275.689	57.1594	39.376
gene-BW25113_0494	tesA	CP009273.1	-	514595	515221	168.508	34.9373	24.0676
gene-BW25113_0495	ybbA	CP009273.1	+	515189	515875	60.5574	12.5555	8.64927
gene-BW25113_0496	ybbP	CP009273.1	+	515872	518286	26.8025	5.55703	3.82813
gene-BW25113_0497	rhsD	CP009273.1	+	518717	522997	8.74223	1.81255	1.24863
gene-BW25113_0498	ybbC	CP009273.1	+	523037	523405	20.9214	4.33769	2.98815
gene-BW25113_0499	rhsH	CP009273.1	+	523408	524115	16.8249	3.48835	2.40306
gene-BW25113_0501	ybbD	CP009273.1	+	524096	524586	5.0468	1.04637	0.720822
gene-BW25113_0502	ylbG	CP009273.1	-	525051	525472	58.8081	12.1928	8.39941
gene-BW25113_0503	mnmH	CP009273.1	-	525588	526682	86.768	17.9899	12.3929
gene-BW25113_0504	allS	CP009273.1	-	526751	527677	8.98166	1.86219	1.28283
gene-BW25113_0505	allA	CP009273.1	+	527907	528389	29.8282	6.18435	4.26028
gene-BW25113_0506	allR	CP009273.1	+	528467	529282	390.537	80.971	55.7794
gene-BW25113_0507	gcl	CP009273.1	+	529372	531153	7.71717	1.60002	1.10222
gene-BW25113_0508	hyi	CP009273.1	+	531166	531942	5.45946	1.13192	0.779761
gene-BW25113_0509	glxR	CP009273.1	+	532042	532920	5.58134	1.15719	0.797169
gene-BW25113_0511	ybbW	CP009273.1	+	533089	534543	2.1677	0.449435	0.309607
gene-BW25113_0512	allB	CP009273.1	+	534603	535964	6.84435	1.41906	0.977561
gene-BW25113_0513	ybbY	CP009273.1	+	536021	537322	4.76574	0.988095	0.680679
gene-BW25113_0514	glxK	CP009273.1	+	537344	538489	12.3822	2.56724	1.76852
gene-BW25113_0515	allE	CP009273.1	-	538717	539502	55.9186	11.5938	7.98671
gene-BW25113_0516	allC	CP009273.1	-	539513	540748	26.3107	5.45507	3.75789
gene-BW25113_0517	allD	CP009273.1	-	540770	541819	4.76667	0.988286	0.680811
gene-BW25113_0518	fdrA	CP009273.1	+	542136	543803	1.83273	0.379986	0.261765
gene-BW25113_0520	ylbF	CP009273.1	+	545083	545898	5.51141	1.1427	0.787181
gene-BW25113_0521	ybcF	CP009273.1	+	545895	546788	8.45603	1.75321	1.20775
gene-BW25113_0522	purK	CP009273.1	-	546983	548050	142.035	29.4484	20.2864
gene-BW25113_0523	purE	CP009273.1	-	548047	548556	132.136	27.396	18.8726
gene-BW25113_0524	lpxH	CP009273.1	-	548674	549396	547.402	113.494	78.1841
gene-BW25113_0525	ppiB	CP009273.1	-	549399	549893	4058.77	841.517	579.704
gene-BW25113_0526	cysS	CP009273.1	+	550067	551452	545.504	113.101	77.9129
gene-BW25113_0527	ybcI	CP009273.1	-	551488	552009	28.8429	5.98008	4.11956
gene-BW25113_0528	ybcJ	CP009273.1	-	552117	552329	340.695	70.6372	48.6606
gene-BW25113_0529	folD	CP009273.1	-	552331	553197	529.377	109.757	75.6096
gene-BW25113_0530	sfmA	CP009273.1	+	553668	554210	2.74954	0.57007	0.39271
gene-BW25113_0531	sfmC	CP009273.1	+	554430	555122	4.89466	1.01482	0.699092
gene-BW25113_0532	sfmD	CP009273.1	+	555153	557756	4.24808	0.880766	0.606743
gene-BW25113_0533	sfmH	CP009273.1	+	557792	558775	2.40854	0.499368	0.344005
gene-BW25113_0534	sfmF	CP009273.1	+	558786	559301	4.42442	0.917327	0.631929
gene-BW25113_0535	sfmZ	CP009273.1	-	559304	559936	2.64771	0.548957	0.378166
gene-BW25113_0536	argU	CP009273.1	+	560179	560255	42.2727	8.76452	6.03771
gene-BW25113_0537	intD	CP009273.1	-	560271	561434	187.399	38.854	26.7658
gene-BW25113_0539	exoD	CP009273.1	-	561554	561832	11.7849	2.4434	1.68321
gene-BW25113_0540	insE1	CP009273.1	+	562298	562597	53.8991	11.175	7.69827
gene-BW25113_0541	insF1	CP009273.1	+	562594	563460	33.9519	7.03933	4.84926
gene-BW25113_0542	renD	CP009273.1	+	562140	563703	52.8892	10.9657	7.55403
gene-BW25113_0543	emrE	CP009273.1	+	563771	564103	124.7	25.8543	17.8105
gene-BW25113_0544	ybcK	CP009273.1	+	564358	565884	5.16306	1.07047	0.737428
gene-BW25113_0545	ybcL	CP009273.1	+	566349	566900	10.0272	2.07896	1.43216
gene-BW25113_0546	ybcM	CP009273.1	+	566910	567707	23.0426	4.77749	3.29112
gene-BW25113_0547	ybcN	CP009273.1	+	567922	568377	6.03282	1.2508	0.861652
gene-BW25113_0548	ninE	CP009273.1	+	568377	568547	1.34553	0.278973	0.192179
gene-BW25113_0549	ybcO	CP009273.1	+	568540	568830	0.596793	0.123735	0.085238
gene-BW25113_0550	rusA	CP009273.1	+	568827	569189	1.3921	0.288628	0.198831
gene-BW25113_0551	quuD	CP009273.1	+	569412	569795	8.34896	1.73101	1.19246
gene-BW25113_0552	insH1	CP009273.1	-	570193	571209	204.812	42.4643	29.2528
gene-BW25113_0553	nmpC	CP009273.1	-	569985	572281	2009.67	416.67	287.036
gene-BW25113_0554	essD	CP009273.1	+	572854	573069	14.9029	3.08985	2.12854
gene-BW25113_0555	rrrD	CP009273.1	+	573069	573566	26.3093	5.45479	3.7577
gene-BW25113_0556	rzpD	CP009273.1	+	573563	574024	27.5114	5.70401	3.92938
gene-BW25113_0557	borD	CP009273.1	-	574056	574349	421.422	87.3745	60.1906
gene-BW25113_0558	ybcV	CP009273.1	-	574640	575050	2.15572	0.446951	0.307896
gene-BW25113_0559	ybcW	CP009273.1	+	575336	575542	29.7729	6.17291	4.2524
gene-BW25113_0560	nohD	CP009273.1	+	576290	576835	4.82073	0.999496	0.688533
gene-BW25113_0561	tfaD	CP009273.1	+	577116	577553	6.54452	1.35689	0.934738
gene-BW25113_0562	ybcY	CP009273.1	-	577608	578262	23.5298	4.87849	3.3607
gene-BW25113_0563	tfaX	CP009273.1	+	578409	578591	12.4262	2.57636	1.77481
gene-BW25113_0564	appY	CP009273.1	+	579137	579886	9.51467	1.9727	1.35896
gene-BW25113_0565	ompT	CP009273.1	-	580136	581089	1557.49	322.919	222.453
gene-BW25113_0566	envY	CP009273.1	-	581603	582364	15.6824	3.25148	2.23988
gene-BW25113_0567	ybcH	CP009273.1	-	582547	583437	17.8642	3.70383	2.5515
gene-BW25113_0568	nfrA	CP009273.1	-	583438	586410	36.3029	7.52677	5.18505
gene-BW25113_0569	nfrB	CP009273.1	-	586397	588634	26.196	5.43128	3.74151
gene-BW25113_0570	cusS	CP009273.1	-	588784	590226	50.0459	10.3762	7.14793
gene-BW25113_0571	cusR	CP009273.1	-	590216	590899	89.8023	18.619	12.8262
gene-BW25113_0572	cusC	CP009273.1	+	591056	592429	3.54275	0.734528	0.506002
gene-BW25113_0573	cusF	CP009273.1	+	592587	592919	5.34835	1.10889	0.763891
gene-BW25113_0574	cusB	CP009273.1	+	592935	594158	7.22712	1.49842	1.03223
gene-BW25113_0575	cusA	CP009273.1	+	594170	597313	7.8222	1.6218	1.11722
gene-BW25113_0576	pheP	CP009273.1	+	597415	598791	362.974	75.2564	51.8426
gene-BW25113_0577	ybdG	CP009273.1	-	598872	600119	217.797	45.1565	31.1074
gene-BW25113_0578	nfsB	CP009273.1	-	600227	600880	1023.14	212.131	146.133
gene-BW25113_0579	ybdF	CP009273.1	-	600974	601342	107.564	22.3015	15.363
gene-BW25113_0580	ybdJ	CP009273.1	-	601407	601655	105.149	21.8007	15.0181
gene-BW25113_0581	ybdK	CP009273.1	-	601721	602839	10.9893	2.27844	1.56957
gene-BW25113_0582	insL1	CP009273.1	+	603521	604633	487.811	101.139	69.6728
gene-BW25113_0583	entD	CP009273.1	-	604915	605535	71.7955	14.8856	10.2544
gene-BW25113_0584	fepA	CP009273.1	-	605710	607950	411.258	85.2673	58.739
gene-BW25113_0585	fes	CP009273.1	+	608193	609395	343.654	71.2508	49.0833
gene-BW25113_0586	entF	CP009273.1	+	609613	613494	178.785	37.0681	25.5355
gene-BW25113_0587	fepE	CP009273.1	+	613710	614843	10.6728	2.21283	1.52438
gene-BW25113_0588	fepC	CP009273.1	-	614840	615655	243.365	50.4574	34.7591
gene-BW25113_0589	fepG	CP009273.1	-	615652	616644	130.613	27.0803	18.6551
gene-BW25113_0590	fepD	CP009273.1	-	616641	617645	103.168	21.3901	14.7352
gene-BW25113_0591	entS	CP009273.1	+	617756	619006	253.679	52.5959	36.2323
gene-BW25113_0592	fepB	CP009273.1	-	619010	619966	138.617	28.7397	19.7982
gene-BW25113_0593	entC	CP009273.1	+	620341	621516	570.678	118.32	81.5085
gene-BW25113_0594	entE	CP009273.1	+	621526	623136	466.619	96.7454	66.646
gene-BW25113_0595	entB	CP009273.1	+	623150	624007	443.115	91.8723	63.289
gene-BW25113_0596	entA	CP009273.1	+	624007	624753	347.026	71.9499	49.5649
gene-BW25113_0597	entH	CP009273.1	+	624756	625169	368.449	76.3916	52.6247
gene-BW25113_0598	cstA	CP009273.1	+	625350	627455	298.389	61.8659	42.6182
gene-BW25113_0599	ybdH	CP009273.1	-	627845	628933	44.5794	9.24277	6.36717
gene-BW25113_0600	ybdL	CP009273.1	+	629042	630202	30.0999	6.2407	4.29909
gene-BW25113_0601	ybdM	CP009273.1	-	630203	630832	30.3278	6.28795	4.33165
gene-BW25113_0602	ybdN	CP009273.1	-	630805	632025	8.56386	1.77557	1.22315
gene-BW25113_0603	ybdO	CP009273.1	-	632172	633074	5.55703	1.15215	0.793697
gene-BW25113_0604	dsbG	CP009273.1	-	633283	634029	117.511	24.364	16.7839
gene-BW25113_0605	ahpC	CP009273.1	+	634401	634964	9391.45	1947.15	1341.36
gene-BW25113_0606	ahpF	CP009273.1	+	635209	636774	788.056	163.39	112.556
gene-BW25113_0607	uspG	CP009273.1	-	636895	637323	614.923	127.494	87.8279
gene-BW25113_0608	ybdR	CP009273.1	+	637544	638782	19.9661	4.13963	2.85171
gene-BW25113_0610	rnk	CP009273.1	-	639013	639423	868.672	180.104	124.07
gene-BW25113_0611	rna	CP009273.1	-	639653	640459	330.913	68.6091	47.2635
gene-BW25113_0612	citT	CP009273.1	-	640573	642036	6.34358	1.31523	0.906038
gene-BW25113_0613	citG	CP009273.1	-	642087	642965	4.15889	0.862275	0.594004
gene-BW25113_0614	citX	CP009273.1	-	642940	643491	5.25966	1.0905	0.751224
gene-BW25113_0615	citF	CP009273.1	-	643495	645027	2.68689	0.55708	0.383761
gene-BW25113_0616	citE	CP009273.1	-	645038	645946	4.32783	0.897301	0.618134
gene-BW25113_0617	citD	CP009273.1	-	645943	646239	1.33333	0.276444	0.190437
gene-BW25113_0618	citC	CP009273.1	-	646254	647312	3.22474	0.668594	0.460582
gene-BW25113_0619	citA	CP009273.1	+	647691	649349	26.424	5.47855	3.77407
gene-BW25113_0620	citB	CP009273.1	+	649318	649998	29.2594	6.06644	4.17905
gene-BW25113_0621	dcuC	CP009273.1	-	650039	651424	61.8449	12.8225	8.83315
gene-BW25113_0622	pagP	CP009273.1	+	652013	652573	26.2299	5.43833	3.74636
gene-BW25113_0623	cspE	CP009273.1	+	652748	652957	78673.7	16311.6	11236.8
gene-BW25113_0624	flc	CP009273.1	-	653011	653394	151.458	31.4023	21.6324
gene-BW25113_0627	tatE	CP009273.1	+	654403	654606	431.441	89.4519	61.6217
gene-BW25113_0628	lipA	CP009273.1	-	654707	655672	1706.72	353.859	243.767
gene-BW25113_0629	ybeF	CP009273.1	-	655881	656834	27.956	5.79619	3.99288
gene-BW25113_0630	lipB	CP009273.1	-	657093	657734	325.908	67.5714	46.5486
gene-BW25113_0631	ybeD	CP009273.1	-	657835	658098	1109.52	230.04	158.47
gene-BW25113_0632	dacA	CP009273.1	-	658208	659419	730.953	151.55	104.4
gene-BW25113_0633	rlpA	CP009273.1	-	659558	660646	552.8	114.613	78.955
gene-BW25113_0634	mrdB	CP009273.1	-	660657	661769	448.835	93.0581	64.1059
gene-BW25113_0635	mrdA	CP009273.1	-	661772	663673	402.554	83.4625	57.4957
gene-BW25113_0636	rlmH	CP009273.1	-	663704	664171	887.229	183.952	126.721
gene-BW25113_0637	rsfS	CP009273.1	-	664175	664492	1228.63	254.736	175.482
gene-BW25113_0638	cobC	CP009273.1	-	664752	665363	120.098	24.9003	17.1533
gene-BW25113_0639	nadD	CP009273.1	-	665387	666028	261.417	54.2004	37.3376
gene-BW25113_0640	holA	CP009273.1	-	666030	667061	9.63566	1.99779	1.37624
gene-BW25113_0641	lptE	CP009273.1	-	667061	667642	1504.05	311.839	214.82
gene-BW25113_0642	leuS	CP009273.1	-	667657	670239	1603.44	332.446	229.016
gene-BW25113_0643	ybeL	CP009273.1	+	670474	670956	227.803	47.2311	32.5366
gene-BW25113_0644	ybeQ	CP009273.1	-	671026	672003	17.5337	3.63532	2.5043
gene-BW25113_0645	ybeR	CP009273.1	+	672167	672874	1.38198	0.28653	0.197385
gene-BW25113_0646	djlB	CP009273.1	+	672871	674298	1.52115	0.315384	0.217262
gene-BW25113_0647	ybeT	CP009273.1	-	674308	674862	1.92973	0.400096	0.275618
gene-BW25113_0648	ybeU	CP009273.1	+	674964	675671	6.7387	1.39715	0.962472
gene-BW25113_0649	djlC	CP009273.1	+	675668	677119	15.0282	3.11585	2.14644
gene-BW25113_0650	hscC	CP009273.1	-	677179	678849	39.8564	8.26353	5.69259
gene-BW25113_0651	rihA	CP009273.1	-	678933	679868	714.811	148.204	102.095
gene-BW25113_0652	gltL	CP009273.1	-	679986	680711	186.644	38.6974	26.6579
gene-BW25113_0653	gltK	CP009273.1	-	680711	681385	131.229	27.208	18.7431
gene-BW25113_0654	gltJ	CP009273.1	-	681385	682125	89.5013	18.5565	12.7832
gene-BW25113_0655	gltI	CP009273.1	-	682295	683203	350.814	72.7352	50.1059
gene-BW25113_0656	insH1	CP009273.1	-	683453	684469	135.567	28.1075	19.3627
gene-BW25113_0657	lnt	CP009273.1	-	684799	686337	332.693	68.9782	47.5178
gene-BW25113_0658	ybeX	CP009273.1	-	686362	687240	1227.34	254.468	175.298
gene-BW25113_0659	ybeY	CP009273.1	-	687330	687797	1169.17	242.408	166.99
gene-BW25113_0660	ybeZ	CP009273.1	-	687794	688834	1006.63	208.707	143.774
gene-BW25113_0661	miaB	CP009273.1	-	688987	690411	788.787	163.541	112.66
gene-BW25113_0662	ubiF	CP009273.1	+	690557	691732	199.038	41.2671	28.4281
gene-BW25113_0664	glnX	CP009273.1	-	691886	691960	2004.96	415.694	286.363
gene-BW25113_0665	glnV	CP009273.1	-	691998	692072	3226.01	668.858	460.763
gene-BW25113_0666	metU	CP009273.1	-	692120	692196	4067.51	843.327	580.952
gene-BW25113_0668	glnW	CP009273.1	-	692212	692286	8264.88	1713.58	1180.45
gene-BW25113_0670	glnU	CP009273.1	-	692321	692395	8811.77	1826.97	1258.56
gene-BW25113_0672	leuW	CP009273.1	-	692419	692503	7141.93	1480.76	1020.06
gene-BW25113_0673	metT	CP009273.1	-	692513	692589	4545.39	942.408	649.207
gene-BW25113_0674	asnB	CP009273.1	-	692969	694633	209.396	43.4146	29.9075
gene-BW25113_0675	umpH	CP009273.1	-	695030	695782	542.242	112.424	77.447
gene-BW25113_0676	nagC	CP009273.1	-	695830	697050	409.898	84.9852	58.5446
gene-BW25113_0677	nagA	CP009273.1	-	697059	698207	482.851	100.111	68.9644
gene-BW25113_0678	nagB	CP009273.1	-	698267	699067	1060.45	219.866	151.461
gene-BW25113_0679	nagE	CP009273.1	+	699400	701346	1004.56	208.278	143.478
gene-BW25113_0680	glnS	CP009273.1	+	701549	703213	1703.8	353.253	243.349
gene-BW25113_0681	chiP	CP009273.1	+	703790	705196	142.009	29.443	20.2827
gene-BW25113_0682	chiQ	CP009273.1	+	705246	705572	64.052	13.2801	9.14838
gene-BW25113_0683	fur	CP009273.1	-	705656	706102	2801.1	580.76	400.074
gene-BW25113_0684	fldA	CP009273.1	-	706391	706921	1143.22	237.027	163.283
gene-BW25113_0685	ybfE	CP009273.1	-	707061	707354	249.633	51.757	35.6544
gene-BW25113_0686	ybfF	CP009273.1	-	707494	708258	162.137	33.6164	23.1577
gene-BW25113_0687	seqA	CP009273.1	+	708443	708988	1462.21	303.164	208.844
gene-BW25113_0688	pgm	CP009273.1	+	709014	710654	1468.84	304.539	209.791
gene-BW25113_0689	ybfP	CP009273.1	+	710868	711362	51.5939	10.6971	7.36903
gene-BW25113_0691	ybfG	CP009273.1	-	711403	712053	6.13518	1.27202	0.876272
gene-BW25113_0692	potE	CP009273.1	-	712402	713721	12.1035	2.50946	1.72872
gene-BW25113_0693	speF	CP009273.1	-	713718	715916	5.3188	1.10276	0.759671
gene-BW25113_0694	kdpE	CP009273.1	-	716512	717189	31.7646	6.58583	4.53685
gene-BW25113_0695	kdpD	CP009273.1	-	717186	719870	23.8299	4.94071	3.40356
gene-BW25113_0696	kdpC	CP009273.1	-	719863	720435	17.7548	3.68114	2.53587
gene-BW25113_0697	kdpB	CP009273.1	-	720444	722492	5.81552	1.20575	0.830616
gene-BW25113_0698	kdpA	CP009273.1	-	722515	724188	2.74006	0.568103	0.391355
gene-BW25113_0699	ybfA	CP009273.1	+	724590	724796	135.729	28.1412	19.3859
gene-BW25113_0700	rhsC	CP009273.1	+	725039	729232	12.2938	2.54891	1.7559
gene-BW25113_0702	ybfB	CP009273.1	+	729232	729558	1.79817	0.372819	0.256828
gene-BW25113_0703	rhsO	CP009273.1	+	729589	731109	5.52301	1.1451	0.788838
gene-BW25113_0704	ybfC	CP009273.1	+	731106	731675	4.61228	0.956276	0.65876
gene-BW25113_0705	ybfL	CP009273.1	+	732281	733417	2.15593	0.446995	0.307926
gene-BW25113_0706	ybfD	CP009273.1	+	733548	734309	2.67848	0.555336	0.38256
gene-BW25113_0707	ybgA	CP009273.1	+	734457	734966	24.4059	5.06014	3.48583
gene-BW25113_0708	phr	CP009273.1	+	734963	736381	44.3813	9.20169	6.33886
gene-BW25113_0709	dtpD	CP009273.1	-	736531	738012	23.5027	4.87288	3.35683
gene-BW25113_0710	ybgI	CP009273.1	+	738283	739026	357.923	74.2092	51.1213
gene-BW25113_0711	ybgJ	CP009273.1	+	739049	739705	272.263	56.449	38.8867
gene-BW25113_0712	ybgK	CP009273.1	+	739699	740631	204.18	42.3332	29.1625
gene-BW25113_0713	ybgL	CP009273.1	+	740621	741355	144.787	30.019	20.6795
gene-BW25113_0714	nei	CP009273.1	+	741391	742182	79.8889	16.5636	11.4103
gene-BW25113_0715	abrB	CP009273.1	-	742179	743225	83.2311	17.2565	11.8877
gene-BW25113_0716	ybgO	CP009273.1	-	743377	744438	13.0028	2.69591	1.85716
gene-BW25113_0717	ybgP	CP009273.1	-	744435	745163	7.05213	1.46214	1.00724
gene-BW25113_0718	ybgQ	CP009273.1	-	745178	747625	4.1201	0.854231	0.588463
gene-BW25113_0719	ybgD	CP009273.1	-	747685	748251	6.4709	1.34163	0.924222
gene-BW25113_0720	gltA	CP009273.1	-	748641	749924	1826.9	378.775	260.931
gene-BW25113_0721	sdhC	CP009273.1	+	750633	751022	2941.65	609.901	420.149
gene-BW25113_0722	sdhD	CP009273.1	+	751016	751363	81.1997	16.8353	11.5975
gene-BW25113_0723	sdhA	CP009273.1	+	751363	753129	2664.97	552.535	380.631
gene-BW25113_0724	sdhB	CP009273.1	+	753145	753861	3025.87	627.362	432.177
gene-BW25113_0726	sucA	CP009273.1	+	754162	756963	2491.35	516.539	355.834
gene-BW25113_0727	sucB	CP009273.1	+	756978	758195	4486.38	930.173	640.778
gene-BW25113_0728	sucC	CP009273.1	+	758470	759636	3742.92	776.03	534.592
gene-BW25113_0729	sucD	CP009273.1	+	759636	760505	3879.25	804.295	554.063
gene-BW25113_0730	mngR	CP009273.1	-	760609	761331	96.426	19.9923	13.7723
gene-BW25113_0731	mngA	CP009273.1	+	761440	763416	5.13303	1.06425	0.733138
gene-BW25113_0732	mngB	CP009273.1	+	763434	766067	23.9749	4.97079	3.42428
gene-BW25113_0733	cydA	CP009273.1	+	766914	768482	1058.53	219.469	151.188
gene-BW25113_0734	cydB	CP009273.1	+	768498	769637	884.479	183.381	126.328
gene-BW25113_0735	ybgE	CP009273.1	+	769765	770058	575.447	119.309	82.1897
gene-BW25113_0736	ybgC	CP009273.1	+	770208	770612	501.21	103.917	71.5865
gene-BW25113_0737	tolQ	CP009273.1	+	770609	771301	605.857	125.614	86.5331
gene-BW25113_0738	tolR	CP009273.1	+	771305	771733	637.124	132.097	90.9988
gene-BW25113_0739	tolA	CP009273.1	+	771798	773063	541.89	112.352	77.3968
gene-BW25113_0740	tolB	CP009273.1	+	773196	774488	2074.43	430.097	296.285
gene-BW25113_0741	pal	CP009273.1	+	774523	775044	7374.54	1528.98	1053.29
gene-BW25113_0742	ybgF	CP009273.1	+	775054	775845	2580.83	535.091	368.614
gene-BW25113_0743	lysT	CP009273.1	+	776010	776085	10180.6	2110.78	1454.08
gene-BW25113_0744	valT	CP009273.1	+	776221	776296	6176.62	1280.62	882.191
gene-BW25113_0745	lysW	CP009273.1	+	776299	776374	4008.37	831.067	572.506
gene-BW25113_0746	valZ	CP009273.1	+	776524	776599	2270.82	470.816	324.336
gene-BW25113_0747	lysY	CP009273.1	+	776603	776678	1789.71	371.066	255.62
gene-BW25113_0748	lysZ	CP009273.1	+	776825	776900	1275.52	264.458	182.18
gene-BW25113_0749	lysQ	CP009273.1	+	777033	777108	281.465	58.3568	40.2009
gene-BW25113_0750	nadA	CP009273.1	+	777541	778584	49.7126	10.3071	7.10033
gene-BW25113_0751	pnuC	CP009273.1	+	778622	779341	53.825	11.1597	7.68769
gene-BW25113_0752	zitB	CP009273.1	-	779338	780279	47.7314	9.89629	6.81736
gene-BW25113_0753	ybgS	CP009273.1	-	780393	780773	25.1864	5.22195	3.5973
gene-BW25113_0754	aroG	CP009273.1	+	781089	782141	685.463	142.119	97.903
gene-BW25113_0755	gpmA	CP009273.1	-	782299	783051	4461.05	924.921	637.161
gene-BW25113_0756	galM	CP009273.1	-	783253	784293	1137.7	235.883	162.495
gene-BW25113_0757	galK	CP009273.1	-	784287	785435	1228.44	254.697	175.456
gene-BW25113_0758	galT	CP009273.1	-	785439	786485	1395.66	289.365	199.338
gene-BW25113_0759	galE	CP009273.1	-	786495	787511	4673.28	968.924	667.473
gene-BW25113_0760	modF	CP009273.1	-	787772	789244	365.045	75.6857	52.1384
gene-BW25113_0761	modE	CP009273.1	-	789312	790100	211.174	43.7832	30.1614
gene-BW25113_0762	acrZ	CP009273.1	+	790229	790378	177.293	36.7587	25.3224
gene-BW25113_0763	modA	CP009273.1	+	790545	791318	225.046	46.6593	32.1427
gene-BW25113_0764	modB	CP009273.1	+	791318	792007	121.894	25.2726	17.4098
gene-BW25113_0765	modC	CP009273.1	+	792010	793068	122.489	25.396	17.4948
gene-BW25113_0766	ybhA	CP009273.1	-	793069	793887	277.761	57.5889	39.6719
gene-BW25113_0767	pgl	CP009273.1	+	794042	795037	537.849	111.514	76.8197
gene-BW25113_0768	ybhD	CP009273.1	-	795078	796031	14.0734	2.91787	2.01006
gene-BW25113_0769	ybhH	CP009273.1	+	796215	797267	1.77588	0.368198	0.253644
gene-BW25113_0770	ybhI	CP009273.1	+	797343	798776	4.1576	0.862007	0.59382
gene-BW25113_0771	ybhJ	CP009273.1	+	798959	801220	14.2347	2.95133	2.03311
gene-BW25113_0772	ybhC	CP009273.1	-	801454	802737	685.443	142.115	97.9001
gene-BW25113_0773	ybhB	CP009273.1	-	802889	803365	101.22	20.9862	14.457
gene-BW25113_0774	bioA	CP009273.1	-	803424	804713	19.5744	4.05842	2.79576
gene-BW25113_0775	bioB	CP009273.1	+	804800	805840	21.8876	4.53802	3.12615
gene-BW25113_0776	bioF	CP009273.1	+	805837	806991	8.69743	1.80326	1.24223
gene-BW25113_0777	bioC	CP009273.1	+	806978	807733	12.8816	2.67077	1.83984
gene-BW25113_0778	bioD	CP009273.1	+	807726	808403	14.6077	3.02865	2.08638
gene-BW25113_0779	uvrB	CP009273.1	+	808982	811003	174.205	36.1184	24.8813
gene-BW25113_0780	ybhK	CP009273.1	-	811195	812103	239.999	49.7596	34.2784
gene-BW25113_0781	moaA	CP009273.1	+	812500	813489	695.49	144.198	99.3351
gene-BW25113_0782	moaB	CP009273.1	+	813511	814023	667.778	138.452	95.377
gene-BW25113_0783	moaC	CP009273.1	+	814026	814511	467.983	97.0281	66.8408
gene-BW25113_0784	moaD	CP009273.1	+	814504	814749	290.372	60.2036	41.4731
gene-BW25113_0785	moaE	CP009273.1	+	814751	815203	312.715	64.8361	44.6643
gene-BW25113_0786	ybhL	CP009273.1	+	815340	816044	328.244	68.0557	46.8823
gene-BW25113_0787	ybhM	CP009273.1	+	816249	816962	10.3011	2.13576	1.47128
gene-BW25113_0788	ybhN	CP009273.1	-	816998	817954	5.02063	1.04094	0.717084
gene-BW25113_0789	clsB	CP009273.1	-	817954	819195	4.38043	0.908206	0.625645
gene-BW25113_0790	ybhP	CP009273.1	-	819192	819953	8.48642	1.75951	1.21209
gene-BW25113_0791	ybhQ	CP009273.1	+	820086	820496	550.562	114.15	78.6354
gene-BW25113_0792	ybhR	CP009273.1	-	820458	821564	35.15	7.28774	5.02038
gene-BW25113_0793	ybhS	CP009273.1	-	821575	822708	21.4637	4.45012	3.0656
gene-BW25113_0794	ybhF	CP009273.1	-	822701	824437	52.6496	10.916	7.51981
gene-BW25113_0795	ybhG	CP009273.1	-	824430	825428	1.3003	0.269596	0.185719
gene-BW25113_0796	ybiH	CP009273.1	-	825428	826099	236.713	49.0783	33.8091
gene-BW25113_0797	rhlE	CP009273.1	+	826328	827692	325.618	67.5113	46.5072
gene-BW25113_0798	ybiA	CP009273.1	-	827924	828406	63.559	13.1779	9.07797
gene-BW25113_0799	dinG	CP009273.1	+	828526	830676	122.999	25.5017	17.5676
gene-BW25113_0800	ybiB	CP009273.1	+	830704	831666	207.979	43.1209	29.7052
gene-BW25113_0801	ybiC	CP009273.1	+	831807	832892	68.0009	14.0988	9.7124
gene-BW25113_0802	ybiJ	CP009273.1	-	833121	833381	60.3602	12.5146	8.62109
gene-BW25113_0803	ybiI	CP009273.1	-	833646	833912	135.494	28.0924	19.3523
gene-BW25113_0804	ybiX	CP009273.1	-	833986	834663	329.056	68.2241	46.9983
gene-BW25113_0805	fiu	CP009273.1	-	834705	836987	910.128	188.699	129.991
gene-BW25113_0806	mcbA	CP009273.1	-	837252	837512	16.3678	3.39358	2.33777
gene-BW25113_0807	rlmF	CP009273.1	+	837788	838714	218.396	45.2806	31.1929
gene-BW25113_0808	ybiO	CP009273.1	-	838711	840936	12.9641	2.68787	1.85162
gene-BW25113_0809	glnQ	CP009273.1	-	841197	841919	312.369	64.7644	44.6149
gene-BW25113_0810	glnP	CP009273.1	-	841916	842575	234.824	48.6867	33.5393
gene-BW25113_0811	glnH	CP009273.1	-	842714	843460	552.786	114.611	78.953
gene-BW25113_0812	dps	CP009273.1	-	843864	844367	399.954	82.9236	57.1245
gene-BW25113_0813	rhtA	CP009273.1	-	844666	845553	81.6216	16.9228	11.6578
gene-BW25113_0814	ompX	CP009273.1	+	845906	846421	18535.3	3842.97	2647.35
gene-BW25113_0815	ybiP	CP009273.1	-	846470	848053	89.2336	18.501	12.745
gene-BW25113_0817	mntR	CP009273.1	+	848639	849106	325.297	67.4448	46.4614
gene-BW25113_0818	ybiR	CP009273.1	+	849103	850221	130.843	27.1281	18.688
gene-BW25113_0819	ldtB	CP009273.1	-	850280	851200	515.805	106.943	73.6711
gene-BW25113_0820	ybiT	CP009273.1	+	851419	853011	862.133	178.748	123.136
gene-BW25113_0821	ybiU	CP009273.1	-	853252	854517	65.8199	13.6466	9.40089
gene-BW25113_0822	ybiV	CP009273.1	-	854669	855484	162.562	33.7045	23.2184
gene-BW25113_0823	ybiW	CP009273.1	-	855630	858062	7.61241	1.5783	1.08726
gene-BW25113_0824	ybiY	CP009273.1	-	858068	858967	6.98778	1.4488	0.998047
gene-BW25113_0825	fsaA	CP009273.1	+	859098	859760	63.5385	13.1736	9.07504
gene-BW25113_0826	moeB	CP009273.1	-	859836	860585	0.790444	0.163885	0.112897
gene-BW25113_0827	moeA	CP009273.1	-	860585	861820	277.442	57.5229	39.6264
gene-BW25113_0828	iaaA	CP009273.1	+	862024	862989	141.51	29.3397	20.2116
gene-BW25113_0829	gsiA	CP009273.1	+	862976	864847	71.992	14.9263	10.2824
gene-BW25113_0830	gsiB	CP009273.1	+	864867	866405	58.718	12.1742	8.38654
gene-BW25113_0831	gsiC	CP009273.1	+	866423	867343	35.152	7.28816	5.02067
gene-BW25113_0832	gsiD	CP009273.1	+	867346	868257	19.3355	4.00889	2.76165
gene-BW25113_0833	yliE	CP009273.1	+	868435	870783	10.0732	2.08851	1.43873
gene-BW25113_0834	yliF	CP009273.1	+	870791	872119	18.0203	3.7362	2.5738
gene-BW25113_0835	rimO	CP009273.1	-	872166	873491	428.21	88.7819	61.1601
gene-BW25113_0836	bssR	CP009273.1	+	873704	874087	90.5781	18.7798	12.937
gene-BW25113_0837	yliI	CP009273.1	+	874198	875313	13.4803	2.7949	1.92536
gene-BW25113_0838	gstB	CP009273.1	-	875310	875936	250.936	52.0273	35.8406
gene-BW25113_0839	dacC	CP009273.1	+	876183	877385	171.467	35.5508	24.4903
gene-BW25113_0840	deoR	CP009273.1	-	877432	878190	213.149	44.1928	30.4436
gene-BW25113_0841	ybjG	CP009273.1	-	878248	878844	182.549	37.8485	26.0731
gene-BW25113_0842	mdfA	CP009273.1	+	879129	880361	181.607	37.653	25.9384
gene-BW25113_0843	ybjH	CP009273.1	-	880402	880686	141.498	29.3372	20.2098
gene-BW25113_0844	ybjI	CP009273.1	-	880772	881587	185.14	38.3856	26.4431
gene-BW25113_0845	ybjJ	CP009273.1	-	881587	882795	100.154	20.7653	14.3048
gene-BW25113_0846	rcdA	CP009273.1	+	882879	883415	110.853	22.9834	15.8328
gene-BW25113_0847	ybjL	CP009273.1	-	883590	885275	90.4798	18.7594	12.923
gene-BW25113_0848	ybjM	CP009273.1	+	885545	885922	35.4788	7.35592	5.06735
gene-BW25113_0849	grxA	CP009273.1	-	885952	886209	181.376	37.6052	25.9055
gene-BW25113_0850	ybjC	CP009273.1	+	886369	886656	348.467	72.2487	49.7707
gene-BW25113_0851	nfsA	CP009273.1	+	886640	887362	363.537	75.3732	51.9231
gene-BW25113_0852	rimK	CP009273.1	+	887423	888325	272.58	56.5148	38.932
gene-BW25113_0853	ybjN	CP009273.1	+	888413	888889	445.753	92.4191	63.6657
gene-BW25113_0854	potF	CP009273.1	+	889240	890352	16.788	3.48069	2.39778
gene-BW25113_0855	potG	CP009273.1	+	890447	891580	6.96914	1.44493	0.995384
gene-BW25113_0856	potH	CP009273.1	+	891590	892543	7.24901	1.50296	1.03536
gene-BW25113_0857	potI	CP009273.1	+	892540	893385	8.5218	1.76685	1.21715
gene-BW25113_0858	ybjO	CP009273.1	+	893445	893933	38.4703	7.97616	5.49462
gene-BW25113_0859	rlmC	CP009273.1	+	893974	895101	124.066	25.723	17.7201
gene-BW25113_0860	artJ	CP009273.1	-	895300	896031	62.8333	13.0274	8.97433
gene-BW25113_0861	artM	CP009273.1	-	896322	896990	145.507	30.1683	20.7824
gene-BW25113_0862	artQ	CP009273.1	-	896990	897706	116.07	24.065	16.5779
gene-BW25113_0863	artI	CP009273.1	-	897713	898444	267.078	55.374	38.1461
gene-BW25113_0864	artP	CP009273.1	-	898462	899190	191.735	39.753	27.3851
gene-BW25113_0865	ybjP	CP009273.1	-	899408	899923	46.8643	9.71651	6.69352
gene-BW25113_0866	ybjQ	CP009273.1	+	900049	900372	311.681	64.6216	44.5165
gene-BW25113_0867	amiD	CP009273.1	+	900369	901199	165.608	34.336	23.6534
gene-BW25113_0868	ybjS	CP009273.1	-	901196	902209	155.469	32.2339	22.2053
gene-BW25113_0869	ybjT	CP009273.1	-	902308	903738	117.7	24.403	16.8107
gene-BW25113_0870	ltaE	CP009273.1	-	903749	904750	228.114	47.2954	32.5809
gene-BW25113_0871	poxB	CP009273.1	-	904787	906505	13.5294	2.80508	1.93237
gene-BW25113_0872	hcr	CP009273.1	-	906638	907606	14.6161	3.0304	2.08758
gene-BW25113_0873	hcp	CP009273.1	-	907618	909270	11.2069	2.32356	1.60065
gene-BW25113_0874	ybjE	CP009273.1	-	909414	910313	83.8433	17.3835	11.9751
gene-BW25113_0875	aqpZ	CP009273.1	-	910808	911503	28.977	6.00788	4.13871
gene-BW25113_0876	ybjD	CP009273.1	+	911929	913587	120.344	24.9512	17.1884
gene-BW25113_0877	ybjX	CP009273.1	-	913584	914576	653.436	135.479	93.3286
gene-BW25113_0878	macA	CP009273.1	+	914691	915806	64.3477	13.3414	9.19062
gene-BW25113_0879	macB	CP009273.1	+	915803	917749	63.0693	13.0763	9.00804
gene-BW25113_0880	cspD	CP009273.1	-	917822	918046	1567.2	324.932	223.839
gene-BW25113_0881	clpS	CP009273.1	+	918369	918689	604.676	125.369	86.3644
gene-BW25113_0882	clpA	CP009273.1	+	918720	920996	906.134	187.871	129.421
gene-BW25113_0883	serW	CP009273.1	-	921340	921427	46.0568	9.54909	6.57818
gene-BW25113_0884	infA	CP009273.1	-	921681	921899	5839.54	1210.73	834.047
gene-BW25113_0885	aat	CP009273.1	-	922184	922888	109.244	22.6498	15.603
gene-BW25113_0886	cydC	CP009273.1	-	922930	924651	145.567	30.1809	20.791
gene-BW25113_0887	cydD	CP009273.1	-	924652	926418	164.783	34.1648	23.5355
gene-BW25113_0888	trxB	CP009273.1	-	926541	927506	1689.62	350.314	241.325
gene-BW25113_0889	lrp	CP009273.1	+	928051	928545	2082.89	431.851	297.494
gene-BW25113_0890	ftsK	CP009273.1	+	928680	932669	440.8	91.3923	62.9584
gene-BW25113_0891	lolA	CP009273.1	+	932828	933439	649.144	134.589	92.7156
gene-BW25113_0892	rarA	CP009273.1	+	933450	934793	296.55	61.4845	42.3555
gene-BW25113_0893	serS	CP009273.1	+	934884	936176	2739.01	567.886	391.206
gene-BW25113_0894	dmsA	CP009273.1	+	936415	938859	89.3791	18.5312	12.7658
gene-BW25113_0895	dmsB	CP009273.1	+	938870	939487	25.5939	5.30644	3.65551
gene-BW25113_0896	dmsC	CP009273.1	+	939489	940352	17.4144	3.61056	2.48725
gene-BW25113_0897	ycaC	CP009273.1	-	940387	941013	5.88676	1.22052	0.840791
gene-BW25113_0898	ycaD	CP009273.1	+	941327	942475	42.3986	8.79062	6.05569
gene-BW25113_0899	ycaM	CP009273.1	+	942685	944115	91.8651	19.0466	13.1209
gene-BW25113_0900	ycaN	CP009273.1	-	944116	945024	29.3256	6.08016	4.18851
gene-BW25113_0901	ycaK	CP009273.1	+	945124	945714	33.9442	7.03774	4.84816
gene-BW25113_0902	pflA	CP009273.1	-	945796	946536	267.602	55.4826	38.2209
gene-BW25113_0903	pflB	CP009273.1	-	946728	949010	2605.28	540.159	372.105
gene-BW25113_0904	focA	CP009273.1	-	949065	949922	1617.67	335.396	231.048
gene-BW25113_0905	ycaO	CP009273.1	-	950328	952088	1190.08	246.742	169.976
gene-BW25113_0906	ycaP	CP009273.1	+	952218	952910	13.7056	2.84162	1.95754
gene-BW25113_0907	serC	CP009273.1	+	953109	954197	570.876	118.361	81.5368
gene-BW25113_0908	aroA	CP009273.1	+	954268	955551	251.53	52.1503	35.9253
gene-BW25113_0909	ycaL	CP009273.1	+	955720	956484	19.1778	3.97618	2.73911
gene-BW25113_0910	cmk	CP009273.1	+	956657	957340	2496.62	517.631	356.586
gene-BW25113_0911	rpsA	CP009273.1	+	957451	959124	47934.7	9938.44	6846.4
gene-BW25113_0912	ihfB	CP009273.1	+	959284	959568	2644.93	548.381	377.769
gene-BW25113_0913	ycaI	CP009273.1	+	959776	962040	23.0459	4.77817	3.29159
gene-BW25113_0914	msbA	CP009273.1	+	962077	963825	887.496	184.007	126.759
gene-BW25113_0915	lpxK	CP009273.1	+	963822	964808	528.751	109.627	75.5202
gene-BW25113_0916	ycaQ	CP009273.1	+	964845	966077	55.425	11.4914	7.91621
gene-BW25113_0917	ycaR	CP009273.1	+	966129	966311	1121.02	232.424	160.112
gene-BW25113_0918	kdsB	CP009273.1	+	966308	967054	945.518	196.037	135.046
gene-BW25113_0919	ycbJ	CP009273.1	+	967208	968101	79.4843	16.4797	11.3525
gene-BW25113_0920	ycbC	CP009273.1	-	968078	968857	45.8462	9.50541	6.54809
gene-BW25113_0921	smtA	CP009273.1	+	968993	969778	710.575	147.325	101.49
gene-BW25113_0922	mukF	CP009273.1	+	969775	971097	661.382	137.126	94.4636
gene-BW25113_0923	mukE	CP009273.1	+	971078	971782	53.4726	11.0866	7.63736
gene-BW25113_0924	mukB	CP009273.1	+	971782	976242	982.525	203.71	140.332
gene-BW25113_0925	ldtD	CP009273.1	+	976503	978350	123.044	25.5111	17.5741
gene-BW25113_0926	ycbK	CP009273.1	+	978531	979079	658.013	136.428	93.9823
gene-BW25113_0927	ycbL	CP009273.1	+	979106	979753	776.713	161.038	110.936
gene-BW25113_0928	aspC	CP009273.1	-	979975	981165	616.927	127.909	88.1141
gene-BW25113_0929	ompF	CP009273.1	-	981350	982438	22974.7	4763.4	3281.41
gene-BW25113_0930	asnS	CP009273.1	-	983041	984441	1920.28	398.137	274.269
gene-BW25113_0931	pncB	CP009273.1	-	984610	985812	664.778	137.83	94.9486
gene-BW25113_0932	pepN	CP009273.1	+	986078	988690	911.835	189.053	130.235
gene-BW25113_0933	ssuB	CP009273.1	-	988733	989500	22.8086	4.72897	3.25769
gene-BW25113_0934	ssuC	CP009273.1	-	989497	990288	5.04419	1.04583	0.720449
gene-BW25113_0935	ssuD	CP009273.1	-	990299	991444	4.29581	0.890662	0.61356
gene-BW25113_0936	ssuA	CP009273.1	-	991441	992400	0.304845	0.063204	0.04354
gene-BW25113_0937	ssuE	CP009273.1	-	992393	992968	8.15884	1.69159	1.16531
gene-BW25113_0938	elfA	CP009273.1	+	993324	993863	12.7074	2.63466	1.81497
gene-BW25113_0939	elfD	CP009273.1	+	993946	994647	4.51282	0.935655	0.644555
gene-BW25113_0940	elfC	CP009273.1	+	994672	997272	6.25682	1.29724	0.893646
gene-BW25113_0941	elfG	CP009273.1	+	997263	998333	20.2941	4.20763	2.89856
gene-BW25113_0942	ycbU	CP009273.1	+	998345	998887	12.6372	2.62011	1.80494
gene-BW25113_0943	ycbV	CP009273.1	+	998895	999410	12.2189	2.53337	1.74519
gene-BW25113_0944	ycbF	CP009273.1	+	999403	1000113	29.0184	6.01646	4.14462
gene-BW25113_0945	pyrD	CP009273.1	+	1000224	1001234	163.565	33.9123	23.3615
gene-BW25113_0946	zapC	CP009273.1	+	1001408	1001950	235.46	48.8186	33.6302
gene-BW25113_0947	ycbX	CP009273.1	-	1001947	1003056	262.362	54.3963	37.4725
gene-BW25113_0948	rlmL	CP009273.1	+	1003300	1005408	659.027	136.638	94.1272
gene-BW25113_0949	uup	CP009273.1	+	1005420	1007327	793.937	164.609	113.396
gene-BW25113_0950	pqiA	CP009273.1	+	1007457	1008710	212.239	44.0041	30.3136
gene-BW25113_0951	pqiB	CP009273.1	+	1008715	1010355	300.055	62.2112	42.8561
gene-BW25113_0952	pqiC	CP009273.1	+	1010352	1010915	281.349	58.3328	40.1843
gene-BW25113_0953	rmf	CP009273.1	+	1011171	1011338	396.422	82.1912	56.62
gene-BW25113_0954	fabA	CP009273.1	-	1011408	1011926	14205.5	2945.27	2028.94
gene-BW25113_0955	ycbZ	CP009273.1	-	1011995	1013755	848.563	175.935	121.198
gene-BW25113_0956	matP	CP009273.1	+	1013941	1014393	325.06	67.3955	46.4275
gene-BW25113_0957	ompA	CP009273.1	-	1014469	1015509	41430.1	8589.82	5917.36
gene-BW25113_0958	sulA	CP009273.1	-	1015866	1016375	192.753	39.964	27.5304
gene-BW25113_0959	sxy	CP009273.1	+	1016594	1017223	66.076	13.6997	9.43747
gene-BW25113_0960	yccS	CP009273.1	-	1017186	1019339	139.859	28.9973	19.9757
gene-BW25113_0961	yccF	CP009273.1	-	1019358	1019804	186.488	38.665	26.6356
gene-BW25113_0962	helD	CP009273.1	+	1019927	1021981	125.91	26.1054	17.9835
gene-BW25113_0963	mgsA	CP009273.1	-	1022013	1022471	1328.25	275.39	189.711
gene-BW25113_0964	yccT	CP009273.1	-	1022567	1023229	6.97587	1.44633	0.996346
gene-BW25113_0965	yccU	CP009273.1	+	1023402	1023815	260.365	53.9821	37.1872
gene-BW25113_0966	hspQ	CP009273.1	-	1023860	1024177	1062.57	220.305	151.764
gene-BW25113_0967	rlmI	CP009273.1	-	1024235	1025425	518.576	107.518	74.0669
gene-BW25113_0968	yccX	CP009273.1	+	1025520	1025798	80.0573	16.5985	11.4344
gene-BW25113_0969	tusE	CP009273.1	-	1025795	1026124	340.976	70.6954	48.7007
gene-BW25113_0970	yccA	CP009273.1	-	1026215	1026874	1048.21	217.328	149.713
gene-BW25113_0971	serT	CP009273.1	-	1027081	1027168	59.0455	12.2421	8.43331
gene-BW25113_0972	hyaA	CP009273.1	+	1027595	1028713	4.05476	0.840684	0.579131
gene-BW25113_0973	hyaB	CP009273.1	+	1028710	1030503	1.95247	0.40481	0.278866
gene-BW25113_0974	hyaC	CP009273.1	+	1030522	1031229	4.97713	1.03192	0.710871
gene-BW25113_0975	hyaD	CP009273.1	+	1031226	1031813	6.56836	1.36183	0.938142
gene-BW25113_0976	hyaE	CP009273.1	+	1031810	1032208	3.10064	0.642865	0.442857
gene-BW25113_0977	hyaF	CP009273.1	+	1032205	1033062	5.18746	1.07553	0.740912
gene-BW25113_0978	cbdA	CP009273.1	+	1033196	1034740	8.12816	1.68523	1.16092
gene-BW25113_0979	cbdB	CP009273.1	+	1034752	1035888	11.6658	2.4187	1.6662
gene-BW25113_0980	appA	CP009273.1	+	1036073	1037371	12.2271	2.53508	1.74637
gene-BW25113_0981	etk	CP009273.1	-	1037486	1039666	32.4746	6.73304	4.63826
gene-BW25113_0982	etp	CP009273.1	-	1039686	1040132	13.5914	2.81793	1.94122
gene-BW25113_0983	gfcE	CP009273.1	-	1040120	1041259	17.2646	3.57952	2.46586
gene-BW25113_0984	gfcD	CP009273.1	-	1041305	1043401	14.5819	3.0233	2.0827
gene-BW25113_0985	gfcC	CP009273.1	-	1043401	1044147	8.10174	1.67976	1.15715
gene-BW25113_0986	gfcB	CP009273.1	-	1044144	1044788	5.31318	1.1016	0.758868
gene-BW25113_0987	gfcA	CP009273.1	-	1044895	1045200	36.5556	7.57916	5.22114
gene-BW25113_0988	insB1	CP009273.1	+	1045483	1045986	225.44	46.741	32.199
gene-BW25113_0989	cspH	CP009273.1	-	1046419	1046631	10.5164	2.1804	1.50204
gene-BW25113_0990	cspG	CP009273.1	+	1046917	1047129	300.615	62.3273	42.9361
gene-BW25113_0991	ymcE	CP009273.1	+	1047303	1047533	197.395	40.9264	28.1934
gene-BW25113_0992	yccM	CP009273.1	-	1047745	1048818	33.2477	6.89333	4.74868
gene-BW25113_0993	torS	CP009273.1	-	1048890	1051634	13.5614	2.81172	1.93694
gene-BW25113_0994	torT	CP009273.1	+	1051717	1052745	15.3644	3.18555	2.19446
gene-BW25113_0995	torR	CP009273.1	-	1052718	1053410	52.9437	10.977	7.56182
gene-BW25113_0996	torC	CP009273.1	+	1053540	1054712	2.54267	0.52718	0.363164
gene-BW25113_0997	torA	CP009273.1	+	1054712	1057258	7.13458	1.47923	1.01901
gene-BW25113_0998	torD	CP009273.1	+	1057255	1057854	29.6171	6.1406	4.23014
gene-BW25113_0999	cbpM	CP009273.1	-	1058006	1058311	0.615525	0.127618	0.087914
gene-BW25113_1000	cbpA	CP009273.1	-	1058311	1059231	129.275	26.8028	18.464
gene-BW25113_1001	yccE	CP009273.1	+	1059492	1060748	4.63325	0.960625	0.661756
gene-BW25113_1002	agp	CP009273.1	+	1061041	1062282	141.152	29.2655	20.1604
gene-BW25113_1003	yccJ	CP009273.1	-	1062320	1062547	84.1009	17.4369	12.0119
gene-BW25113_1004	wrbA	CP009273.1	-	1062568	1063164	102.092	21.167	14.5816
gene-BW25113_1006	rutG	CP009273.1	-	1063967	1065295	11.1535	2.31249	1.59303
gene-BW25113_1007	rutF	CP009273.1	-	1065316	1065810	6.82424	1.41489	0.97469
gene-BW25113_1008	rutE	CP009273.1	-	1065821	1066411	1.89002	0.391862	0.269946
gene-BW25113_1009	rutD	CP009273.1	-	1066421	1067221	1.05119	0.217945	0.150138
gene-BW25113_1010	rutC	CP009273.1	-	1067229	1067615	3.40569	0.70611	0.486425
gene-BW25113_1011	rutB	CP009273.1	-	1067627	1068319	3.1	0.642731	0.442765
gene-BW25113_1012	rutA	CP009273.1	-	1068319	1069467	2.1114	0.437762	0.301566
gene-BW25113_1013	rutR	CP009273.1	+	1069698	1070336	130.308	27.0172	18.6116
gene-BW25113_1014	putA	CP009273.1	-	1070376	1074338	316.422	65.6046	45.1937
gene-BW25113_1015	putP	CP009273.1	+	1074761	1076269	440.807	91.3937	62.9594
gene-BW25113_1018	efeO	CP009273.1	+	1077699	1078826	539.79	111.916	77.0968
gene-BW25113_1019	efeB	CP009273.1	+	1078832	1080103	376.053	77.968	53.7107
gene-BW25113_1020	phoH	CP009273.1	+	1080448	1081512	38.8667	8.05833	5.55123
gene-BW25113_1021	pgaD	CP009273.1	-	1081562	1081975	20.6787	4.28738	2.95349
gene-BW25113_1022	pgaC	CP009273.1	-	1081977	1083302	8.70156	1.80412	1.24282
gene-BW25113_1023	pgaB	CP009273.1	-	1083295	1085313	7.90328	1.63861	1.12881
gene-BW25113_1024	pgaA	CP009273.1	-	1085322	1087745	12.0384	2.49595	1.71941
gene-BW25113_1025	ycdT	CP009273.1	+	1088332	1089690	13.6829	2.8369	1.95429
gene-BW25113_1026	insF1	CP009273.1	-	1089731	1090597	34.3471	7.12128	4.90571
gene-BW25113_1027	insE1	CP009273.1	-	1090594	1090893	66.6318	13.815	9.51686
gene-BW25113_1028	ymdE	CP009273.1	+	1090961	1091302	3.27778	0.679591	0.468157
gene-BW25113_1029	ycdU	CP009273.1	+	1091299	1092285	3.4387	0.712956	0.491141
gene-BW25113_1032	serX	CP009273.1	-	1093021	1093108	13.7898	2.85907	1.96956
gene-BW25113_1033	ghrA	CP009273.1	+	1093342	1094280	90.1289	18.6867	12.8729
gene-BW25113_1034	ycdX	CP009273.1	+	1094335	1095072	296.312	61.4351	42.3214
gene-BW25113_1035	ycdY	CP009273.1	+	1095096	1095650	395.326	81.964	56.4634
gene-BW25113_1036	ycdZ	CP009273.1	+	1095752	1096243	2265.94	469.804	323.639
gene-BW25113_1037	csgG	CP009273.1	-	1096307	1097140	45.6175	9.458	6.51543
gene-BW25113_1038	csgF	CP009273.1	-	1097167	1097583	4.36931	0.9059	0.624057
gene-BW25113_1039	csgE	CP009273.1	-	1097608	1097997	6.9	1.4306	0.98551
gene-BW25113_1040	csgD	CP009273.1	-	1098002	1098652	12.7066	2.63449	1.81485
gene-BW25113_1041	csgB	CP009273.1	+	1099407	1099862	3.05044	0.632456	0.435687
gene-BW25113_1042	csgA	CP009273.1	+	1099903	1100358	18.8706	3.9125	2.69524
gene-BW25113_1043	csgC	CP009273.1	+	1100417	1100749	9.58859	1.98803	1.36951
gene-BW25113_1044	ymdA	CP009273.1	+	1100870	1101181	36.6442	7.59755	5.2338
gene-BW25113_1045	ymdB	CP009273.1	+	1101276	1101809	78.3015	16.2345	11.1836
gene-BW25113_1046	clsC	CP009273.1	+	1101811	1103232	38.6498	8.01337	5.52025
gene-BW25113_1047	opgC	CP009273.1	-	1103240	1104397	103.426	21.4435	14.772
gene-BW25113_1048	opgG	CP009273.1	+	1104791	1106326	856.914	177.666	122.391
gene-BW25113_1049	opgH	CP009273.1	+	1106319	1108862	643.674	133.455	91.9343
gene-BW25113_1050	yceK	CP009273.1	+	1109035	1109262	51.6711	10.7131	7.38005
gene-BW25113_1051	msyB	CP009273.1	-	1109263	1109637	65.9707	13.6779	9.42242
gene-BW25113_1053	mdtG	CP009273.1	-	1109720	1110946	16.9071	3.50539	2.4148
gene-BW25113_1054	lpxL	CP009273.1	-	1111118	1112038	329.069	68.2269	47.0002
gene-BW25113_1055	yceA	CP009273.1	+	1112263	1113315	277.338	57.5013	39.6115
gene-BW25113_1056	yceI	CP009273.1	-	1113357	1113932	106.622	22.1061	15.2285
gene-BW25113_1057	yceJ	CP009273.1	-	1113936	1114502	17.7496	3.68006	2.53512
gene-BW25113_1058	yceO	CP009273.1	-	1114763	1114903	9.48936	1.96745	1.35534
gene-BW25113_1059	solA	CP009273.1	-	1114924	1116042	258.072	53.5068	36.8598
gene-BW25113_1060	bssS	CP009273.1	-	1116157	1116411	1665.1	345.23	237.822
gene-BW25113_1061	dinI	CP009273.1	-	1116698	1116943	207.866	43.0974	29.689
gene-BW25113_1062	pyrC	CP009273.1	-	1117017	1118063	179.021	37.1169	25.5691
gene-BW25113_1063	yceB	CP009273.1	-	1118169	1118729	176.701	36.6358	25.2377
gene-BW25113_1064	grxB	CP009273.1	-	1118863	1119510	215.239	44.6261	30.7421
gene-BW25113_1065	mdtH	CP009273.1	-	1119574	1120782	10.3242	2.14055	1.47459
gene-BW25113_1066	rimJ	CP009273.1	+	1121018	1121602	355.747	73.758	50.8105
gene-BW25113_1067	yceH	CP009273.1	+	1121613	1122260	386.847	80.2061	55.2524
gene-BW25113_1068	yceM	CP009273.1	+	1122262	1123185	194.379	40.3011	27.7626
gene-BW25113_1069	murJ	CP009273.1	+	1123295	1124830	138.068	28.6261	19.72
gene-BW25113_1070	flgN	CP009273.1	-	1124870	1125286	129.134	26.7738	18.4439
gene-BW25113_1071	flgM	CP009273.1	-	1125291	1125584	214.861	44.5476	30.688
gene-BW25113_1072	flgA	CP009273.1	-	1125660	1126319	314.062	65.1154	44.8567
gene-BW25113_1073	flgB	CP009273.1	+	1126474	1126890	713.446	147.921	101.9
gene-BW25113_1074	flgC	CP009273.1	+	1126894	1127298	690.963	143.259	98.6885
gene-BW25113_1075	flgD	CP009273.1	+	1127310	1128005	715.06	148.255	102.13
gene-BW25113_1076	flgE	CP009273.1	+	1128030	1129238	621.171	128.789	88.7203
gene-BW25113_1077	flgF	CP009273.1	+	1129258	1130013	411.382	85.293	58.7567
gene-BW25113_1078	flgG	CP009273.1	+	1130185	1130967	374.916	77.7323	53.5483
gene-BW25113_1079	flgH	CP009273.1	+	1131020	1131718	151.933	31.5006	21.7002
gene-BW25113_1080	flgI	CP009273.1	+	1131730	1132827	112.396	23.3034	16.0532
gene-BW25113_1081	flgJ	CP009273.1	+	1132827	1133768	85.92	17.814	12.2717
gene-BW25113_1082	flgK	CP009273.1	+	1133834	1135477	103.95	21.5521	14.8468
gene-BW25113_1083	flgL	CP009273.1	+	1135489	1136442	109.929	22.7918	15.7008
gene-BW25113_1084	rne	CP009273.1	-	1136638	1139823	1689.12	350.209	241.252
gene-BW25113_1085	yceQ	CP009273.1	+	1139958	1140278	942.249	195.359	134.579
gene-BW25113_1086	rluC	CP009273.1	+	1140396	1141355	975.344	202.221	139.306
gene-BW25113_1087	yceF	CP009273.1	-	1141467	1142051	149.711	31.04	21.3829
gene-BW25113_1088	yceD	CP009273.1	+	1142250	1142771	26043.7	5399.72	3719.76
gene-BW25113_1089	rpmF	CP009273.1	+	1142823	1142996	43535.9	9026.41	6218.12
gene-BW25113_1090	plsX	CP009273.1	+	1143077	1144147	2156.74	447.164	308.042
gene-BW25113_1091	fabH	CP009273.1	+	1144215	1145168	3362.34	697.122	480.234
gene-BW25113_1092	fabD	CP009273.1	+	1145184	1146113	5336.84	1106.5	762.247
gene-BW25113_1093	fabG	CP009273.1	+	1146126	1146860	13882.3	2878.26	1982.78
gene-BW25113_1094	acpP	CP009273.1	+	1147071	1147307	54868.1	11375.9	7836.67
gene-BW25113_1095	fabF	CP009273.1	+	1147395	1148636	7921.85	1642.46	1131.46
gene-BW25113_1096	pabC	CP009273.1	+	1148756	1149565	129.319	26.812	18.4702
gene-BW25113_1097	yceG	CP009273.1	+	1149568	1150590	123.108	25.5243	17.5832
gene-BW25113_1098	tmk	CP009273.1	+	1150580	1151221	356.106	73.8324	50.8617
gene-BW25113_1099	holB	CP009273.1	+	1151218	1152222	253.879	52.6374	36.2609
gene-BW25113_1100	ycfH	CP009273.1	+	1152233	1153030	425.614	88.2437	60.7894
gene-BW25113_1101	ptsG	CP009273.1	+	1153325	1154758	4454.18	923.498	636.18
gene-BW25113_1102	fhuE	CP009273.1	-	1154818	1157007	75.542	15.6623	10.7895
gene-BW25113_1103	hinT	CP009273.1	+	1157341	1157700	797.036	165.252	113.839
gene-BW25113_1104	ycfL	CP009273.1	+	1157703	1158080	680.984	141.19	97.2633
gene-BW25113_1105	lpoB	CP009273.1	+	1158094	1158735	442.781	91.8029	63.2413
gene-BW25113_1106	thiK	CP009273.1	+	1158716	1159540	198.247	41.1031	28.3151
gene-BW25113_1107	nagZ	CP009273.1	+	1159551	1160576	465.334	96.479	66.4625
gene-BW25113_1108	ycfP	CP009273.1	+	1160599	1161141	793.009	164.417	113.264
gene-BW25113_1109	ndh	CP009273.1	+	1161541	1162845	1136.09	235.549	162.265
gene-BW25113_1110	ycfJ	CP009273.1	+	1163055	1163594	140.35	29.0991	20.0458
gene-BW25113_1111	ycfQ	CP009273.1	-	1163656	1164288	144.046	29.8654	20.5737
gene-BW25113_1112	bhsA	CP009273.1	+	1164529	1164786	31.3333	6.49643	4.47526
gene-BW25113_1113	ldtC	CP009273.1	-	1164868	1165830	42.3157	8.77342	6.04384
gene-BW25113_1114	mfd	CP009273.1	-	1165974	1169420	254.165	52.6968	36.3018
gene-BW25113_1115	ycfT	CP009273.1	-	1169548	1170621	6.02514	1.24921	0.860556
gene-BW25113_1116	lolC	CP009273.1	+	1170883	1172082	314.204	65.1448	44.877
gene-BW25113_1117	lolD	CP009273.1	+	1172075	1172776	14.4899	3.00423	2.06956
gene-BW25113_1118	lolE	CP009273.1	+	1172776	1174020	437.653	90.7399	62.5089
gene-BW25113_1119	nagK	CP009273.1	+	1174049	1174960	363.826	75.433	51.9643
gene-BW25113_1120	cobB	CP009273.1	+	1175087	1175815	306.591	63.5664	43.7897
gene-BW25113_1121	ycfZ	CP009273.1	-	1175935	1176723	33.3605	6.91672	4.76479
gene-BW25113_1122	ymfA	CP009273.1	-	1176720	1177181	62.2091	12.898	8.88516
gene-BW25113_1123	potD	CP009273.1	-	1177239	1178285	1617.65	335.392	231.045
gene-BW25113_1124	potC	CP009273.1	-	1178282	1179076	857.644	177.818	122.495
gene-BW25113_1125	potB	CP009273.1	-	1179073	1179900	750.861	155.678	107.244
gene-BW25113_1126	potA	CP009273.1	-	1179914	1181050	898.835	186.358	128.378
gene-BW25113_1127	pepT	CP009273.1	+	1181300	1182526	235.592	48.8459	33.649
gene-BW25113_1128	roxA	CP009273.1	-	1182575	1183696	592.723	122.891	84.6571
gene-BW25113_1129	phoQ	CP009273.1	-	1183772	1185232	0.41593	0.086236	0.059406
gene-BW25113_1130	phoP	CP009273.1	-	1185232	1185903	652.386	135.261	93.1787
gene-BW25113_1131	purB	CP009273.1	-	1186072	1187442	637.093	132.09	90.9943
gene-BW25113_1132	hflD	CP009273.1	-	1187446	1188087	451.17	93.5423	64.4394
gene-BW25113_1133	mnmA	CP009273.1	-	1188123	1189229	801.08	166.09	114.416
gene-BW25113_1134	nudJ	CP009273.1	-	1189283	1189744	177.199	36.7392	25.3089
gene-BW25113_1135	rluE	CP009273.1	-	1189754	1190407	130.405	27.0373	18.6254
gene-BW25113_1136	icd	CP009273.1	+	1190579	1191829	4238.38	878.754	605.357
gene-BW25113_1137	ymfD	CP009273.1	-	1192323	1192988	63.036	13.0694	9.00328
gene-BW25113_1138	ymfE	CP009273.1	-	1192989	1193693	42.983	8.91178	6.13915
gene-BW25113_1139	lit	CP009273.1	+	1194151	1195044	28.8714	5.98598	4.12362
gene-BW25113_1140	intE	CP009273.1	-	1195135	1196262	12.5773	2.60769	1.79639
gene-BW25113_1141	xisE	CP009273.1	-	1196243	1196488	16.7308	3.46885	2.38962
gene-BW25113_1143	ymfI	CP009273.1	+	1196953	1197294	117.772	24.418	16.8211
gene-BW25113_1144	ymfJ	CP009273.1	-	1197232	1197540	31.7961	6.59237	4.54136
gene-BW25113_1145	cohE	CP009273.1	-	1197715	1198389	278.596	57.762	39.7911
gene-BW25113_1146	croE	CP009273.1	+	1198480	1198680	4.74129	0.983025	0.677187
gene-BW25113_1147	ymfL	CP009273.1	+	1198724	1199281	10.7724	2.23347	1.53859
gene-BW25113_1148	ymfM	CP009273.1	+	1199278	1199616	5.85546	1.21403	0.83632
gene-BW25113_1150	ymfR	CP009273.1	+	1201005	1201187	2.99935	0.621864	0.42839
gene-BW25113_1151	beeE	CP009273.1	+	1201187	1201598	1.05882	0.219529	0.151229
gene-BW25113_1152	jayE	CP009273.1	+	1201599	1202378	0.312021	0.064692	0.044565
gene-BW25113_1153	ymfQ	CP009273.1	+	1202369	1202953	2.96349	0.614429	0.423268
gene-BW25113_1154	stfP	CP009273.1	+	1202957	1203586	1.59682	0.331074	0.228071
gene-BW25113_1155	tfaP	CP009273.1	+	1203588	1204001	2.6087	0.540868	0.372594
gene-BW25113_1156	tfaE	CP009273.1	-	1203973	1204575	6.10917	1.26663	0.872557
gene-BW25113_1157	stfE	CP009273.1	-	1204575	1205075	1.97208	0.408878	0.281668
gene-BW25113_1158	pinE	CP009273.1	+	1205141	1205695	1.91171	0.39636	0.273045
gene-BW25113_1159	mcrA	CP009273.1	+	1205802	1206635	82	17.0013	11.7119
gene-BW25113_1160	iraM	CP009273.1	-	1207136	1207459	13.4352	2.78555	1.91891
gene-BW25113_1161	ycgX	CP009273.1	-	1208159	1208563	9.09383	1.88545	1.29885
gene-BW25113_1162	bluR	CP009273.1	-	1208784	1209515	321.915	66.7436	45.9784
gene-BW25113_1163	bluF	CP009273.1	-	1209720	1210931	144.719	30.0049	20.6698
gene-BW25113_1164	ycgZ	CP009273.1	+	1211245	1211481	19.0928	3.95857	2.72698
gene-BW25113_1165	ymgA	CP009273.1	+	1211524	1211796	10.5714	2.1918	1.50989
gene-BW25113_1166	ariR	CP009273.1	+	1211825	1212091	6.79026	1.40784	0.969836
gene-BW25113_1167	ymgC	CP009273.1	+	1212204	1212452	7.24096	1.50129	1.03421
gene-BW25113_1168	ycgG	CP009273.1	+	1212784	1214307	2.95604	0.612883	0.422203
gene-BW25113_1171	ymgD	CP009273.1	-	1217761	1218090	38.8606	8.05707	5.55036
gene-BW25113_1172	ymgG	CP009273.1	-	1218100	1218444	30.3478	6.2921	4.3345
gene-BW25113_1174	minE	CP009273.1	-	1219735	1220001	2243.71	465.194	320.463
gene-BW25113_1175	minD	CP009273.1	-	1220005	1220817	2363.9	490.113	337.63
gene-BW25113_1176	minC	CP009273.1	-	1220841	1221536	1411.11	292.569	201.545
gene-BW25113_1177	ycgJ	CP009273.1	+	1222056	1222424	157.352	32.6243	22.4742
gene-BW25113_1178	pliG	CP009273.1	-	1222527	1222928	79.9005	16.566	11.412
gene-BW25113_1179	ycgL	CP009273.1	+	1223170	1223463	456.803	94.7101	65.244
gene-BW25113_1180	ycgM	CP009273.1	+	1223535	1224194	291.027	60.3395	41.5667
gene-BW25113_1181	ycgN	CP009273.1	+	1224271	1224732	174.258	36.1293	24.8888
gene-BW25113_1182	hlyE	CP009273.1	-	1224939	1225850	2.30373	0.477638	0.329036
gene-BW25113_1183	umuD	CP009273.1	+	1226223	1226642	0.56483	0.117108	0.080673
gene-BW25113_1184	umuC	CP009273.1	+	1226642	1227910	17.1255	3.55067	2.44599
gene-BW25113_1185	dsbB	CP009273.1	-	1227956	1228486	513.463	106.458	73.3367
gene-BW25113_1186	nhaB	CP009273.1	-	1228632	1230173	464.774	96.3628	66.3825
gene-BW25113_1187	fadR	CP009273.1	+	1230394	1231113	894.578	185.475	127.77
gene-BW25113_1188	ycgB	CP009273.1	-	1231165	1232697	14.0965	2.92267	2.01337
gene-BW25113_1189	dadA	CP009273.1	+	1233027	1234325	1035.59	214.711	147.91
gene-BW25113_1190	dadX	CP009273.1	+	1234335	1235405	577.934	119.825	82.5448
gene-BW25113_1191	cvrA	CP009273.1	-	1235791	1237527	99.3333	20.5951	14.1875
gene-BW25113_1192	ldcA	CP009273.1	-	1237622	1238536	76.2732	15.8139	10.8939
gene-BW25113_1193	emtA	CP009273.1	+	1238636	1239247	321.784	66.7162	45.9595
gene-BW25113_1194	ycgR	CP009273.1	-	1239249	1239983	22.798	4.72676	3.25617
gene-BW25113_1195	ymgE	CP009273.1	+	1240184	1240438	6.40392	1.32774	0.914656
gene-BW25113_1196	ycgY	CP009273.1	+	1240616	1241056	5.96826	1.23741	0.852431
gene-BW25113_1197	treA	CP009273.1	-	1241135	1242832	28.7809	5.96723	4.11071
gene-BW25113_1198	dhaM	CP009273.1	-	1243152	1244570	1679.6	348.237	239.893
gene-BW25113_1199	dhaL	CP009273.1	-	1244581	1245213	1465.85	303.919	209.364
gene-BW25113_1200	dhaK	CP009273.1	-	1245224	1246294	1954.91	405.317	279.215
gene-BW25113_1201	dhaR	CP009273.1	+	1246522	1248441	71.1745	14.7568	10.1657
gene-BW25113_1202	ycgV	CP009273.1	-	1248541	1251408	16.2092	3.3607	2.31512
gene-BW25113_1203	ychF	CP009273.1	-	1252177	1253268	1560.65	323.574	222.904
gene-BW25113_1204	pth	CP009273.1	-	1253385	1253969	387.856	80.4153	55.3966
gene-BW25113_1205	ychH	CP009273.1	+	1254247	1254525	1441.46	298.863	205.881
gene-BW25113_1206	dauA	CP009273.1	-	1254580	1256259	152.787	31.6777	21.8222
gene-BW25113_1207	prs	CP009273.1	-	1256384	1257331	2925.48	606.548	417.839
gene-BW25113_1208	ispE	CP009273.1	-	1257482	1258333	851.379	176.519	121.6
gene-BW25113_1209	lolB	CP009273.1	-	1258333	1258956	253.791	52.6191	36.2483
gene-BW25113_1210	hemA	CP009273.1	+	1259170	1260426	290.901	60.3134	41.5487
gene-BW25113_1211	prfA	CP009273.1	+	1260468	1261550	458.443	95.0503	65.4783
gene-BW25113_1212	prmC	CP009273.1	+	1261550	1262383	251.395	52.1224	35.9061
gene-BW25113_1213	ychQ	CP009273.1	+	1262380	1262772	240.198	49.8009	34.3069
gene-BW25113_1214	ychA	CP009273.1	+	1262776	1263585	624.057	129.387	89.1325
gene-BW25113_1215	kdsA	CP009273.1	+	1263621	1264475	1157.29	239.944	165.292
gene-BW25113_1216	chaA	CP009273.1	-	1266205	1267305	279.846	58.0211	39.9696
gene-BW25113_1217	chaB	CP009273.1	+	1267575	1267805	21.7749	4.51465	3.11005
gene-BW25113_1218	chaC	CP009273.1	+	1267963	1268658	56.6911	11.7539	8.09705
gene-BW25113_1219	ychN	CP009273.1	-	1268702	1269055	524.381	108.721	74.8961
gene-BW25113_1220	ychO	CP009273.1	+	1269240	1270634	53.7362	11.1413	7.67501
gene-BW25113_1221	narL	CP009273.1	-	1270635	1271285	179.14	37.1416	25.5861
gene-BW25113_1222	narX	CP009273.1	-	1271278	1273074	84.8497	17.5921	12.1189
gene-BW25113_1223	narK	CP009273.1	+	1273413	1274804	165.182	34.2476	23.5925
gene-BW25113_1224	narG	CP009273.1	+	1275320	1279063	157.329	32.6195	22.471
gene-BW25113_1225	narH	CP009273.1	+	1279060	1280598	18.2744	3.78889	2.61009
gene-BW25113_1226	narJ	CP009273.1	+	1280595	1281305	10.5438	2.18607	1.50594
gene-BW25113_1227	narI	CP009273.1	+	1281305	1281982	5.88649	1.22046	0.840753
gene-BW25113_1229	tpr	CP009273.1	-	1282543	1282632	0.732176	0.151804	0.104575
gene-BW25113_1230	tyrV	CP009273.1	-	1282700	1282784	537.633	111.469	76.7888
gene-BW25113_1231	tyrT	CP009273.1	-	1282994	1283078	741.527	153.743	105.911
gene-BW25113_1232	purU	CP009273.1	-	1283238	1284080	543.414	112.667	77.6145
gene-BW25113_1233	ychJ	CP009273.1	-	1284130	1284588	476.538	98.8019	68.0627
gene-BW25113_1234	rssA	CP009273.1	+	1284701	1285606	215.083	44.5937	30.7197
gene-BW25113_1235	rssB	CP009273.1	+	1285698	1286711	154.638	32.0615	22.0866
gene-BW25113_1236	galU	CP009273.1	+	1286913	1287821	2050.17	425.068	292.821
gene-BW25113_1237	hns	CP009273.1	-	1287965	1288378	19249.9	3991.13	2749.41
gene-BW25113_1238	tdk	CP009273.1	+	1288983	1289600	304.586	63.1506	43.5032
gene-BW25113_1241	adhE	CP009273.1	-	1290902	1293577	1722.08	357.044	245.961
gene-BW25113_1242	ychE	CP009273.1	+	1294054	1294701	91.6204	18.9959	13.0859
gene-BW25113_1243	oppA	CP009273.1	+	1295439	1297070	3010.24	624.121	429.945
gene-BW25113_1244	oppB	CP009273.1	+	1297156	1298076	1070.7	221.991	152.926
gene-BW25113_1245	oppC	CP009273.1	+	1298091	1298999	1382.14	286.562	197.407
gene-BW25113_1246	oppD	CP009273.1	+	1299011	1300024	2344.07	486.003	334.798
gene-BW25113_1247	oppF	CP009273.1	+	1300021	1301025	2438.82	505.648	348.331
gene-BW25113_1248	yciU	CP009273.1	-	1301078	1301407	467.058	96.8363	66.7087
gene-BW25113_1249	clsA	CP009273.1	-	1301442	1302902	256.322	53.144	36.6099
gene-BW25113_1250	kch	CP009273.1	-	1303273	1304526	65.3222	13.5434	9.3298
gene-BW25113_1251	yciI	CP009273.1	-	1304826	1305122	532.946	110.497	76.1194
gene-BW25113_1252	tonB	CP009273.1	+	1305346	1306065	500.022	103.671	71.4169
gene-BW25113_1253	yciA	CP009273.1	-	1306105	1306503	367.88	76.2735	52.5433
gene-BW25113_1254	yciB	CP009273.1	-	1306608	1307147	435.987	90.3944	62.2709
gene-BW25113_1255	yciC	CP009273.1	-	1307177	1307920	344.753	71.4785	49.2402
gene-BW25113_1256	ompW	CP009273.1	+	1308277	1308915	268.712	55.7128	38.3795
gene-BW25113_1257	yciE	CP009273.1	-	1308975	1309481	30.5937	6.34307	4.36962
gene-BW25113_1258	yciF	CP009273.1	-	1309527	1310027	5.40719	1.12109	0.772295
gene-BW25113_1259	yciG	CP009273.1	-	1310113	1310292	5.97222	1.23824	0.852997
gene-BW25113_1260	trpA	CP009273.1	-	1310673	1311479	0.846216	0.175448	0.120863
gene-BW25113_1261	trpB	CP009273.1	-	1311479	1312672	199.15	41.2903	28.4441
gene-BW25113_1262	trpC	CP009273.1	-	1312684	1314045	111.117	23.0381	15.8705
gene-BW25113_1263	trpD	CP009273.1	-	1314046	1315641	24.2158	5.02072	3.45868
gene-BW25113_1264	trpE	CP009273.1	-	1315641	1317203	10.5042	2.17786	1.50028
gene-BW25113_1265	trpL	CP009273.1	-	1317295	1317339	6.71111	1.39143	0.958531
gene-BW25113_1266	yciV	CP009273.1	+	1317477	1318358	249.335	51.6954	35.6119
gene-BW25113_1267	yciO	CP009273.1	+	1318355	1318975	468.946	97.2278	66.9783
gene-BW25113_1268	yciQ	CP009273.1	+	1319003	1320898	52.6477	10.9156	7.51954
gene-BW25113_1269	rluB	CP009273.1	+	1321109	1321984	1461.46	303.008	208.736
gene-BW25113_1270	btuR	CP009273.1	-	1322024	1322614	193.168	40.05	27.5897
gene-BW25113_1271	yciK	CP009273.1	-	1322611	1323369	184.739	38.3024	26.3858
gene-BW25113_1272	sohB	CP009273.1	+	1323589	1324638	460.263	95.4275	65.7382
gene-BW25113_1273	yciN	CP009273.1	-	1324674	1324925	1020.81	211.646	145.799
gene-BW25113_1274	topA	CP009273.1	+	1325305	1327902	2523.85	523.277	360.475
gene-BW25113_1275	cysB	CP009273.1	+	1328112	1329086	417.364	86.5332	59.6111
gene-BW25113_1276	acnA	CP009273.1	+	1330088	1332763	111.312	23.0786	15.8984
gene-BW25113_1277	ribA	CP009273.1	-	1332827	1333417	624.25	129.428	89.1601
gene-BW25113_1278	pgpB	CP009273.1	+	1333587	1334351	114.149	23.6668	16.3036
gene-BW25113_1279	yciS	CP009273.1	+	1334500	1334808	449.88	93.2749	64.2553
gene-BW25113_1280	yciM	CP009273.1	+	1334815	1335984	206.494	42.813	29.493
gene-BW25113_1281	pyrF	CP009273.1	+	1336178	1336915	340.965	70.6933	48.6992
gene-BW25113_1282	yciH	CP009273.1	+	1336915	1337241	306.309	63.5079	43.7494
gene-BW25113_1283	osmB	CP009273.1	-	1337367	1337585	50.7397	10.52	7.24703
gene-BW25113_1284	yciT	CP009273.1	-	1337854	1338603	245.229	50.8441	35.0255
gene-BW25113_1285	gmr	CP009273.1	-	1339014	1340999	52.9144	10.9709	7.55763
gene-BW25113_1286	rnb	CP009273.1	-	1341235	1343169	1033.52	214.282	147.614
gene-BW25113_1287	yciW	CP009273.1	-	1343237	1344364	31.4574	6.52216	4.49299
gene-BW25113_1288	fabI	CP009273.1	-	1344508	1345296	3512.81	728.321	501.726
gene-BW25113_1289	ycjD	CP009273.1	-	1345664	1346017	39.2881	8.14572	5.61143
gene-BW25113_1290	sapF	CP009273.1	-	1346085	1346891	157.715	32.6995	22.526
gene-BW25113_1291	sapD	CP009273.1	-	1346893	1347885	204.926	42.4878	29.269
gene-BW25113_1292	sapC	CP009273.1	-	1347885	1348775	92.5673	19.1922	13.2212
gene-BW25113_1293	sapB	CP009273.1	-	1348762	1349727	147.35	30.5506	21.0457
gene-BW25113_1294	sapA	CP009273.1	-	1349724	1351367	151.602	31.4321	21.653
gene-BW25113_1295	ymjA	CP009273.1	-	1351680	1351925	170.016	35.2499	24.283
gene-BW25113_1296	puuP	CP009273.1	-	1352059	1353444	13.7958	2.86032	1.97042
gene-BW25113_1297	puuA	CP009273.1	-	1353747	1355165	17.081	3.54146	2.43964
gene-BW25113_1298	puuD	CP009273.1	+	1355377	1356141	38.2261	7.92553	5.45974
gene-BW25113_1299	puuR	CP009273.1	+	1356168	1356725	106.513	22.0835	15.2129
gene-BW25113_1300	puuC	CP009273.1	+	1357000	1358487	6.74395	1.39824	0.963222
gene-BW25113_1301	puuB	CP009273.1	+	1358489	1359769	3.63466	0.753584	0.519129
gene-BW25113_1302	puuE	CP009273.1	+	1359807	1361072	8.2188	1.70403	1.17387
gene-BW25113_1303	pspF	CP009273.1	-	1361192	1362169	83.6063	17.3343	11.9413
gene-BW25113_1304	pspA	CP009273.1	+	1362336	1363004	217.572	45.1099	31.0753
gene-BW25113_1305	pspB	CP009273.1	+	1363058	1363282	0.793732	0.164567	0.113367
gene-BW25113_1306	pspC	CP009273.1	+	1363282	1363641	105.253	21.8223	15.033
gene-BW25113_1307	pspD	CP009273.1	+	1363650	1363871	85.8333	17.7961	12.2594
gene-BW25113_1308	pspE	CP009273.1	+	1363946	1364260	542.889	112.559	77.5395
gene-BW25113_1309	ycjM	CP009273.1	+	1364473	1366152	42.4232	8.79572	6.0592
gene-BW25113_1310	ycjN	CP009273.1	+	1366166	1367458	23.6597	4.90543	3.37926
gene-BW25113_1311	ycjO	CP009273.1	+	1367479	1368360	9.43367	1.95591	1.34739
gene-BW25113_1312	ycjP	CP009273.1	+	1368347	1369189	16.9887	3.52232	2.42646
gene-BW25113_1313	ycjQ	CP009273.1	+	1369220	1370272	21.4027	4.43747	3.05689
gene-BW25113_1314	ycjR	CP009273.1	+	1370291	1371079	25.3638	5.25873	3.62264
gene-BW25113_1315	ycjS	CP009273.1	+	1371089	1372144	20.3579	4.22087	2.90767
gene-BW25113_1316	ycjT	CP009273.1	+	1372141	1374408	13.2215	2.74125	1.88839
gene-BW25113_1317	ycjU	CP009273.1	+	1374405	1375064	4.90103	1.01614	0.700002
gene-BW25113_1319	ompG	CP009273.1	+	1376204	1377109	3.04525	0.631381	0.434946
gene-BW25113_1320	ycjW	CP009273.1	-	1377220	1378218	39.4935	8.18829	5.64076
gene-BW25113_1321	ycjX	CP009273.1	+	1378374	1379771	111.379	23.0925	15.908
gene-BW25113_1322	ycjF	CP009273.1	+	1379768	1380829	102.501	21.2518	14.64
gene-BW25113_1323	tyrR	CP009273.1	+	1380977	1382518	524.668	108.781	74.937
gene-BW25113_1324	tpx	CP009273.1	-	1382562	1383068	5137.23	1065.12	733.738
gene-BW25113_1325	ycjG	CP009273.1	+	1383187	1384152	135.057	28.0017	19.2898
gene-BW25113_1326	mpaA	CP009273.1	-	1384127	1384855	142.025	29.4464	20.285
gene-BW25113_1327	ycjY	CP009273.1	-	1385190	1386110	11.9618	2.48008	1.70848
gene-BW25113_1328	pgrR	CP009273.1	+	1386248	1387147	49.2822	10.2178	7.03886
gene-BW25113_1329	mppA	CP009273.1	+	1387484	1389097	566.7	117.495	80.9403
gene-BW25113_1330	ynaI	CP009273.1	-	1389148	1390179	80.8711	16.7672	11.5506
gene-BW25113_1331	insH1	CP009273.1	+	1390333	1391349	431.477	89.4593	61.6268
gene-BW25113_1332	ynaJ	CP009273.1	+	1391622	1391879	922.151	191.192	131.709
gene-BW25113_1333	uspE	CP009273.1	-	1391929	1392879	711.624	147.543	101.639
gene-BW25113_1334	fnr	CP009273.1	-	1393031	1393783	2071.86	429.564	295.919
gene-BW25113_1335	ogt	CP009273.1	-	1393978	1394493	102.159	21.1809	14.5911
gene-BW25113_1336	abgT	CP009273.1	-	1394504	1396030	7.70596	1.5977	1.10062
gene-BW25113_1337	abgB	CP009273.1	-	1396067	1397512	10.341	2.14404	1.47698
gene-BW25113_1338	abgA	CP009273.1	-	1397512	1398822	7.04197	1.46003	1.00579
gene-BW25113_1339	abgR	CP009273.1	+	1398998	1399906	88.4532	18.3393	12.6336
gene-BW25113_1340	smrA	CP009273.1	+	1400236	1400799	66.9415	13.8792	9.56109
gene-BW25113_1341	ydaM	CP009273.1	-	1400820	1402052	15.8694	3.29025	2.26659
gene-BW25113_1342	ydaN	CP009273.1	+	1402307	1403290	112.14	23.2503	16.0167
gene-BW25113_1343	dbpA	CP009273.1	+	1403768	1405141	162.501	33.6919	23.2097
gene-BW25113_1344	ttcA	CP009273.1	-	1405270	1406205	733.381	152.054	104.747
gene-BW25113_1345	intR	CP009273.1	-	1406257	1407492	69.8163	14.4752	9.97169
gene-BW25113_1346	ydaQ	CP009273.1	-	1407494	1407709	2.51389	0.521211	0.359052
gene-BW25113_1347	rcbA	CP009273.1	-	1407788	1407997	6.14762	1.2746	0.878049
gene-BW25113_1348	ralR	CP009273.1	-	1407990	1408184	5.36923	1.11322	0.766874
gene-BW25113_1349	recT	CP009273.1	-	1408241	1409050	16.3902	3.39823	2.34098
gene-BW25113_1350	recE	CP009273.1	-	1409043	1411643	7.47901	1.55064	1.06821
gene-BW25113_1351	racC	CP009273.1	-	1411745	1412020	2.35942	0.489184	0.336989
gene-BW25113_1352	kilR	CP009273.1	-	1412265	1412486	1.72157	0.356937	0.245887
gene-BW25113_1353	sieB	CP009273.1	+	1412928	1413416	5.04294	1.04557	0.720271
gene-BW25113_1355	ydaG	CP009273.1	-	1413579	1413713	7.31852	1.51737	1.04529
gene-BW25113_1356	racR	CP009273.1	-	1414022	1414498	550.595	114.156	78.6402
gene-BW25113_1357	ydaS	CP009273.1	+	1414622	1414918	14.0034	2.90336	2.00007
gene-BW25113_1358	ydaT	CP009273.1	+	1414941	1415363	11.1749	2.31693	1.59609
gene-BW25113_1359	ydaU	CP009273.1	+	1415376	1416233	9.07809	1.88218	1.2966
gene-BW25113_1360	ydaV	CP009273.1	+	1416240	1416986	4.98996	1.03458	0.712703
gene-BW25113_1361	ydaW	CP009273.1	+	1416958	1417457	8.003	1.65928	1.14305
gene-BW25113_1362	rzpR	CP009273.1	+	1417458	1417901	5.89385	1.22199	0.841804
gene-BW25113_1363	trkG	CP009273.1	+	1418039	1419496	29.3717	6.08972	4.19509
gene-BW25113_1365	ynaK	CP009273.1	+	1419634	1419897	7.42424	1.53929	1.06039
gene-BW25113_1366	ydaY	CP009273.1	+	1419887	1420339	8.57837	1.77858	1.22523
gene-BW25113_1368	tmpR	CP009273.1	+	1420711	1421643	7.81565	1.62044	1.11629
gene-BW25113_1370	insH1	CP009273.1	-	1422003	1422983	22.6319	4.69233	3.23245
gene-BW25113_1372	stfR	CP009273.1	+	1423306	1426668	4.43813	0.92017	0.633888
gene-BW25113_1373	tfaR	CP009273.1	+	1426668	1427243	6.87067	1.42451	0.981321
gene-BW25113_1374	pinR	CP009273.1	-	1427341	1427931	15.5338	3.22067	2.21866
gene-BW25113_1375	ynaE	CP009273.1	-	1428248	1428481	13.735	2.84772	1.96174
gene-BW25113_1376	uspF	CP009273.1	-	1429442	1429876	311.789	64.644	44.532
gene-BW25113_1377	ompN	CP009273.1	-	1430017	1431150	3.86243	0.800809	0.551662
gene-BW25113_1378	pfo	CP009273.1	-	1431517	1435041	194.857	40.4002	27.8309
gene-BW25113_1379	hslJ	CP009273.1	-	1435578	1436000	305.44	63.3276	43.6252
gene-BW25113_1380	ldhA	CP009273.1	-	1436111	1437100	266.969	55.3513	38.1305
gene-BW25113_1381	ydbH	CP009273.1	+	1437308	1439947	68.3903	14.1795	9.76801
gene-BW25113_1382	ynbE	CP009273.1	+	1439944	1440129	88.423	18.333	12.6292
gene-BW25113_1383	ydbL	CP009273.1	+	1440137	1440463	95.208	19.7397	13.5983
gene-BW25113_1384	feaR	CP009273.1	-	1440635	1441540	70.6976	14.6579	10.0976
gene-BW25113_1385	feaB	CP009273.1	+	1441776	1443275	24.9033	5.16327	3.55688
gene-BW25113_1386	tynA	CP009273.1	-	1443333	1445606	6.46614	1.34064	0.923542
gene-BW25113_1387	paaZ	CP009273.1	-	1445854	1447899	5.02884	1.04264	0.718256
gene-BW25113_1388	paaA	CP009273.1	+	1448184	1449113	15.2419	3.16015	2.17697
gene-BW25113_1389	paaB	CP009273.1	+	1449125	1449412	15.2778	3.16758	2.18209
gene-BW25113_1390	paaC	CP009273.1	+	1449421	1450167	12.921	2.67895	1.84548
gene-BW25113_1391	paaD	CP009273.1	+	1450182	1450679	10.6486	2.2078	1.52091
gene-BW25113_1392	paaE	CP009273.1	+	1450687	1451757	7.41607	1.53759	1.05922
gene-BW25113_1393	paaF	CP009273.1	+	1451754	1452521	8.91603	1.84858	1.27345
gene-BW25113_1394	paaG	CP009273.1	+	1452521	1453309	7.43487	1.54149	1.0619
gene-BW25113_1395	paaH	CP009273.1	+	1453311	1454738	9.96989	2.06708	1.42397
gene-BW25113_1396	paaI	CP009273.1	+	1454728	1455150	1.33817	0.277447	0.191128
gene-BW25113_1397	paaJ	CP009273.1	+	1455150	1456355	39.6191	8.21434	5.6587
gene-BW25113_1398	paaK	CP009273.1	+	1456382	1457695	37.554	7.78618	5.36375
gene-BW25113_1399	paaX	CP009273.1	+	1457796	1458746	97.9438	20.3069	13.9891
gene-BW25113_1400	paaY	CP009273.1	+	1458728	1459318	113.332	23.4975	16.187
gene-BW25113_1402	insD1	CP009273.1	-	1462178	1463083	61.4724	12.7452	8.77994
gene-BW25113_1403	insC1	CP009273.1	-	1463041	1463406	126.589	26.246	18.0803
gene-BW25113_1404	insI1	CP009273.1	+	1463615	1464766	86.5515	17.9449	12.3619
gene-BW25113_1406	ydbC	CP009273.1	+	1468478	1469338	43.4739	9.01356	6.20926
gene-BW25113_1407	ydbD	CP009273.1	+	1469401	1471707	3.72995	0.773341	0.53274
gene-BW25113_1408	ynbA	CP009273.1	+	1471878	1472483	2.24752	0.465985	0.321008
gene-BW25113_1409	ynbB	CP009273.1	+	1472483	1473379	1.47536	0.305891	0.210722
gene-BW25113_1410	ynbC	CP009273.1	+	1473395	1475152	9.0182	1.86977	1.28805
gene-BW25113_1411	ynbD	CP009273.1	+	1475166	1476458	14.2251	2.94932	2.03173
gene-BW25113_1412	azoR	CP009273.1	-	1476512	1477117	146.769	30.43	20.9626
gene-BW25113_1413	hrpA	CP009273.1	+	1477318	1481220	268.3	55.6273	38.3205
gene-BW25113_1414	ydcF	CP009273.1	+	1481492	1482292	97.1486	20.1421	13.8755
gene-BW25113_1415	aldA	CP009273.1	+	1482489	1483928	1428.47	296.168	204.024
gene-BW25113_1418	cybB	CP009273.1	+	1485159	1485689	589.8	122.285	84.2397
gene-BW25113_1419	ydcA	CP009273.1	+	1485934	1486107	269.816	55.9417	38.5372
gene-BW25113_1420	mokB	CP009273.1	-	1486219	1486386	56.5896	11.7329	8.08256
gene-BW25113_1421	trg	CP009273.1	+	1486727	1488367	26.5448	5.5036	3.79133
gene-BW25113_1422	ydcI	CP009273.1	-	1488405	1489328	356.769	73.97	50.9565
gene-BW25113_1423	ydcJ	CP009273.1	+	1489545	1490888	9.45982	1.96133	1.35112
gene-BW25113_1424	opgD	CP009273.1	+	1491113	1492768	271.992	56.3929	38.848
gene-BW25113_1426	ydcH	CP009273.1	+	1492908	1493132	423.8	87.8676	60.5303
gene-BW25113_1427	rimL	CP009273.1	+	1493195	1493734	136.124	28.223	19.4423
gene-BW25113_1428	ydcK	CP009273.1	-	1493726	1494706	15.8257	3.28118	2.26034
gene-BW25113_1429	tehA	CP009273.1	+	1494830	1495822	55.3151	11.4686	7.90052
gene-BW25113_1430	tehB	CP009273.1	+	1495819	1496412	233.943	48.504	33.4135
gene-BW25113_1431	ydcL	CP009273.1	+	1496714	1497382	158.448	32.8515	22.6308
gene-BW25113_1432	insQ	CP009273.1	+	1497974	1499122	110.305	22.8699	15.7547
gene-BW25113_1433	ydcO	CP009273.1	-	1499162	1500337	22.4932	4.66357	3.21265
gene-BW25113_1434	ydcN	CP009273.1	+	1500429	1500965	67.8492	14.0673	9.69073
gene-BW25113_1435	ydcP	CP009273.1	+	1501038	1502999	203.309	42.1527	29.0382
gene-BW25113_1436	yncJ	CP009273.1	-	1503091	1503321	29.4329	6.1024	4.20383
gene-BW25113_1438	hicB	CP009273.1	+	1503765	1504181	68.0456	14.1081	9.71878
gene-BW25113_1439	ydcR	CP009273.1	+	1504260	1505666	87.4904	18.1396	12.496
gene-BW25113_1440	ydcS	CP009273.1	+	1505911	1507056	15.2286	3.15739	2.17507
gene-BW25113_1441	ydcT	CP009273.1	+	1507074	1508087	8.86686	1.83839	1.26643
gene-BW25113_1442	ydcU	CP009273.1	+	1508088	1509029	7.95594	1.64953	1.13633
gene-BW25113_1443	ydcV	CP009273.1	+	1509019	1509813	8.99434	1.86482	1.28464
gene-BW25113_1444	patD	CP009273.1	+	1509835	1511259	20.866	4.3262	2.98023
gene-BW25113_1445	ydcX	CP009273.1	+	1511646	1511819	44.7069	9.2692	6.38537
gene-BW25113_1446	ydcY	CP009273.1	+	1511905	1512138	785.714	162.904	112.222
gene-BW25113_1447	ydcZ	CP009273.1	-	1512139	1512588	91.5178	18.9746	13.0713
gene-BW25113_1448	mnaT	CP009273.1	-	1512585	1513103	113.965	23.6287	16.2774
gene-BW25113_1449	curA	CP009273.1	+	1513284	1514321	32.8536	6.81162	4.69239
gene-BW25113_1450	mcbR	CP009273.1	+	1514519	1515184	21.1486	4.38481	3.02061
gene-BW25113_1451	yncD	CP009273.1	-	1515220	1517322	221.191	45.8601	31.5921
gene-BW25113_1452	yncE	CP009273.1	+	1517564	1518625	844.55	175.103	120.625
gene-BW25113_1453	ansP	CP009273.1	-	1518738	1520237	99.8293	20.6979	14.2584
gene-BW25113_1454	yncG	CP009273.1	+	1520504	1521121	4.58414	0.950443	0.654742
gene-BW25113_1455	yncH	CP009273.1	+	1521197	1521409	1.15493	0.239455	0.164956
gene-BW25113_1456	rhsE	CP009273.1	+	1522159	1524195	3.68164	0.763324	0.525839
gene-BW25113_1457	ydcD	CP009273.1	+	1524179	1524661	7.12422	1.47708	1.01754
gene-BW25113_1459	yncI	CP009273.1	+	1524843	1525896	5.29317	1.09745	0.75601
gene-BW25113_1460	ydcC	CP009273.1	+	1526073	1527209	2.89094	0.599387	0.412906
gene-BW25113_1461	pptA	CP009273.1	+	1527309	1527542	81.1538	16.8258	11.591
gene-BW25113_1462	yddH	CP009273.1	-	1527539	1528108	28.4544	5.89952	4.06407
gene-BW25113_1463	nhoA	CP009273.1	+	1528281	1529126	30.6797	6.3609	4.3819
gene-BW25113_1464	yddE	CP009273.1	-	1529222	1530115	124.46	25.8046	17.7763
gene-BW25113_1465	narV	CP009273.1	-	1530194	1530874	4.95741	1.02783	0.708054
gene-BW25113_1466	narW	CP009273.1	-	1530871	1531566	0.804006	0.166697	0.114834
gene-BW25113_1467	narY	CP009273.1	-	1531566	1533110	3.9759	0.824334	0.567868
gene-BW25113_1468	narZ	CP009273.1	-	1533107	1536847	5.06831	1.05083	0.723894
gene-BW25113_1469	narU	CP009273.1	-	1536929	1538317	2.455	0.509002	0.350642
gene-BW25113_1471	yddK	CP009273.1	-	1538641	1539971	0.167373	0.034702	0.023905
gene-BW25113_1472	yddL	CP009273.1	-	1540007	1540285	1.23297	0.255636	0.176103
gene-BW25113_1473	yddG	CP009273.1	-	1540545	1541426	43.6905	9.05846	6.2402
gene-BW25113_1474	fdnG	CP009273.1	+	1541658	1544705	78.0666	16.1858	11.1501
gene-BW25113_1475	fdnH	CP009273.1	+	1544718	1545602	41.8892	8.685	5.98293
gene-BW25113_1476	fdnI	CP009273.1	+	1545595	1546248	44.968	9.32333	6.42266
gene-BW25113_1477	yddM	CP009273.1	-	1546655	1546939	278.295	57.6996	39.7481
gene-BW25113_1478	adhP	CP009273.1	-	1547085	1548095	163.363	33.8705	23.3327
gene-BW25113_1479	maeA	CP009273.1	-	1548229	1549926	1146.26	237.656	163.717
gene-BW25113_1480	sra	CP009273.1	-	1550083	1550220	219.674	45.5456	31.3755
gene-BW25113_1481	bdm	CP009273.1	-	1550322	1550537	4.55093	0.943556	0.649997
gene-BW25113_1482	osmC	CP009273.1	+	1550882	1551313	99.9815	20.7294	14.2801
gene-BW25113_1483	ddpF	CP009273.1	-	1551369	1552295	7.28441	1.5103	1.04042
gene-BW25113_1484	ddpD	CP009273.1	-	1552288	1553274	5.23031	1.08441	0.747032
gene-BW25113_1485	ddpC	CP009273.1	-	1553271	1554167	9.67932	2.00684	1.38247
gene-BW25113_1486	ddpB	CP009273.1	-	1554164	1555186	5.33303	1.10571	0.761703
gene-BW25113_1487	ddpA	CP009273.1	-	1555188	1556738	6.98066	1.44732	0.99703
gene-BW25113_1488	ddpX	CP009273.1	-	1556752	1557333	6.31443	1.30919	0.901875
gene-BW25113_1489	dosP	CP009273.1	-	1557591	1559990	11.9429	2.47616	1.70578
gene-BW25113_1490	dosC	CP009273.1	-	1560015	1561397	11.8445	2.45576	1.69173
gene-BW25113_1491	yddW	CP009273.1	-	1561761	1563080	75.9114	15.7389	10.8422
gene-BW25113_1492	gadC	CP009273.1	-	1563211	1564746	7.97982	1.65448	1.13974
gene-BW25113_1493	gadB	CP009273.1	-	1564902	1566302	5.39445	1.11845	0.770476
gene-BW25113_1494	pqqL	CP009273.1	-	1566664	1569459	15.9227	3.30131	2.27421
gene-BW25113_1495	yddB	CP009273.1	-	1569504	1571876	14.354	2.97605	2.05014
gene-BW25113_1496	yddA	CP009273.1	-	1571914	1573599	9.85587	2.04345	1.40769
gene-BW25113_1497	ydeM	CP009273.1	-	1573890	1575047	4.44819	0.922254	0.635323
gene-BW25113_1498	ydeN	CP009273.1	-	1575099	1576781	21.1379	4.38257	3.01907
gene-BW25113_1499	ydeO	CP009273.1	-	1577183	1577944	1.39633	0.289504	0.199434
gene-BW25113_1500	safA	CP009273.1	-	1578019	1578216	0.267677	0.055498	0.038232
gene-BW25113_1501	ydeP	CP009273.1	-	1578464	1580743	6.32632	1.31165	0.903572
gene-BW25113_1502	ydeQ	CP009273.1	-	1581077	1581991	0	0	0
gene-BW25113_1503	ydeR	CP009273.1	-	1582050	1582553	1.44048	0.298658	0.20574
gene-BW25113_1504	ydeS	CP009273.1	-	1582566	1583096	1.58095	0.327782	0.225803
gene-BW25113_1505	ydeT	CP009273.1	-	1583110	1584336	2.49144	0.516557	0.355846
gene-BW25113_1506	yneL	CP009273.1	-	1584591	1584793	2.89163	0.599529	0.413004
gene-BW25113_1507	hipA	CP009273.1	-	1585111	1586433	90.0786	18.6762	12.8657
gene-BW25113_1508	hipB	CP009273.1	-	1586433	1586699	230.594	47.8097	32.9352
gene-BW25113_1511	lsrK	CP009273.1	-	1592874	1594466	14.924	3.09424	2.13156
gene-BW25113_1512	lsrR	CP009273.1	-	1594545	1595498	61.5094	12.7529	8.78524
gene-BW25113_1513	lsrA	CP009273.1	+	1595747	1597282	4.73144	0.980983	0.67578
gene-BW25113_1514	lsrC	CP009273.1	+	1597276	1598304	4.42662	0.917784	0.632244
gene-BW25113_1515	lsrD	CP009273.1	+	1598304	1599296	2.17121	0.450162	0.310108
gene-BW25113_1516	lsrB	CP009273.1	+	1599308	1600330	8.42424	1.74662	1.20321
gene-BW25113_1517	lsrF	CP009273.1	+	1600357	1601232	4.30137	0.891815	0.614354
gene-BW25113_1518	lsrG	CP009273.1	+	1601256	1601546	7.75258	1.60736	1.10728
gene-BW25113_1519	tam	CP009273.1	+	1601603	1602361	10.8485	2.24925	1.54946
gene-BW25113_1520	yneE	CP009273.1	-	1602365	1603279	8.70601	1.80504	1.24346
gene-BW25113_1521	uxaB	CP009273.1	-	1603486	1604937	69.3299	14.3744	9.90221
gene-BW25113_1522	yneF	CP009273.1	-	1605164	1606111	46.7141	9.68537	6.67206
gene-BW25113_1523	yneG	CP009273.1	-	1606223	1606582	0.736544	0.15271	0.105199
gene-BW25113_1524	glsB	CP009273.1	-	1606582	1607508	143.931	29.8417	20.5573
gene-BW25113_1525	sad	CP009273.1	-	1607572	1608960	31.5601	6.54344	4.50765
gene-BW25113_1526	yneJ	CP009273.1	+	1609061	1609942	46.4252	9.62546	6.63079
gene-BW25113_1527	yneK	CP009273.1	+	1610020	1611135	2.50358	0.519075	0.357581
gene-BW25113_1528	ydeA	CP009273.1	+	1611285	1612475	21.1738	4.39002	3.0242
gene-BW25113_1529	marC	CP009273.1	-	1612500	1613165	119.716	24.8211	17.0988
gene-BW25113_1530	marR	CP009273.1	+	1613377	1613811	98.9747	20.5207	14.1363
gene-BW25113_1531	marA	CP009273.1	+	1613831	1614214	223.562	46.3518	31.9309
gene-BW25113_1532	marB	CP009273.1	+	1614246	1614464	138.315	28.6772	19.7552
gene-BW25113_1533	eamA	CP009273.1	-	1614495	1615394	57.5556	11.9331	8.22052
gene-BW25113_1534	ydeE	CP009273.1	+	1615589	1616776	47.5539	9.85947	6.792
gene-BW25113_1535	dgcZ	CP009273.1	-	1617217	1618107	54.3951	11.2779	7.76911
gene-BW25113_1536	ydeI	CP009273.1	-	1618362	1618754	4.6743	0.969135	0.667619
gene-BW25113_1537	ydeJ	CP009273.1	+	1619030	1619548	13.9051	2.88299	1.98603
gene-BW25113_1538	dcp	CP009273.1	-	1619592	1621637	116.766	24.2094	16.6774
gene-BW25113_1539	ydfG	CP009273.1	+	1621774	1622520	786.904	163.151	112.391
gene-BW25113_1540	rspR	CP009273.1	+	1622609	1623295	253.464	52.5515	36.2017
gene-BW25113_1541	ydfZ	CP009273.1	+	1623472	1623675	49.4902	10.2609	7.06856
gene-BW25113_1542	ydfI	CP009273.1	-	1623710	1625170	10.9336	2.26689	1.56162
gene-BW25113_1544	ydfK	CP009273.1	+	1627329	1627562	16.0385	3.3253	2.29073
gene-BW25113_1545	pinQ	CP009273.1	+	1627879	1628469	16.3477	3.38942	2.3349
gene-BW25113_1546	tfaQ	CP009273.1	-	1628567	1629142	7.33354	1.52048	1.04743
gene-BW25113_1547	stfQ	CP009273.1	-	1629142	1630104	5.05647	1.04837	0.722203
gene-BW25113_1548	nohQ	CP009273.1	-	1630097	1630624	5.55208	1.15113	0.79299
gene-BW25113_1549	ydfO	CP009273.1	+	1631304	1631714	13.2482	2.74678	1.8922
gene-BW25113_1550	gnsB	CP009273.1	-	1631866	1632039	224.339	46.5128	32.0418
gene-BW25113_1551	ynfN	CP009273.1	-	1632211	1632366	1.45513	0.301696	0.207832
gene-BW25113_1552	cspI	CP009273.1	-	1632712	1632924	18.1502	3.76314	2.59235
gene-BW25113_1553	rzpQ	CP009273.1	-	1633287	1633784	2.47479	0.513104	0.353468
gene-BW25113_1554	rrrQ	CP009273.1	-	1633781	1634314	1.84457	0.382439	0.263455
gene-BW25113_1555	ydfR	CP009273.1	-	1634311	1634622	9.29167	1.92647	1.32711
gene-BW25113_1556	essQ	CP009273.1	-	1634627	1634842	5.99074	1.24208	0.855643
gene-BW25113_1557	cspB	CP009273.1	-	1635596	1635811	188.653	39.1139	26.9448
gene-BW25113_1558	cspF	CP009273.1	+	1636112	1636324	88.9437	18.4409	12.7036
gene-BW25113_1559	quuQ	CP009273.1	-	1636746	1637498	13.6122	2.82226	1.9442
gene-BW25113_1560	ydfU	CP009273.1	-	1637512	1638561	4.55429	0.944252	0.650477
gene-BW25113_1561	rem	CP009273.1	-	1638908	1639159	24.6746	5.11585	3.52421
gene-BW25113_1562	hokD	CP009273.1	-	1639376	1639531	255.455	52.9642	36.486
gene-BW25113_1563	relE	CP009273.1	-	1639603	1639890	382.04	79.2094	54.5658
gene-BW25113_1564	relB	CP009273.1	-	1639890	1640129	353.712	73.3361	50.5198
gene-BW25113_1565	ydfV	CP009273.1	+	1640154	1640459	15.1242	3.13574	2.16015
gene-BW25113_1566	flxA	CP009273.1	+	1640662	1640994	11.4895	2.38215	1.64101
gene-BW25113_1567	intK	CP009273.1	-	1641431	1641613	13.3388	2.76557	1.90515
gene-BW25113_1568	ydfX	CP009273.1	-	1641615	1641893	12.8996	2.67451	1.84241
gene-BW25113_1569	dicC	CP009273.1	-	1641877	1642107	9.99574	2.07244	1.42767
gene-BW25113_1570	dicA	CP009273.1	+	1642191	1642598	315.642	65.4429	45.0824
gene-BW25113_1571	ydfA	CP009273.1	+	1642765	1642920	25.0769	5.19927	3.58167
gene-BW25113_1572	ydfB	CP009273.1	+	1642922	1643050	22.2481	4.61275	3.17763
gene-BW25113_1573	ydfC	CP009273.1	+	1643080	1643298	26.9726	5.5923	3.85243
gene-BW25113_1574	dicF	CP009273.1	+	1643639	1643691	3.39623	0.704149	0.485074
gene-BW25113_1575	dicB	CP009273.1	+	1643866	1644054	1.79894	0.372979	0.256938
gene-BW25113_1576	ydfD	CP009273.1	+	1644051	1644242	3.10938	0.644675	0.444104
gene-BW25113_1577	ydfE	CP009273.1	+	1644335	1645099	5.2	1.07813	0.742703
gene-BW25113_1578	insD1	CP009273.1	+	1645102	1645794	32.5254	6.74358	4.64552
gene-BW25113_1579	intQ	CP009273.1	+	1645808	1646965	6.40846	1.32868	0.915305
gene-BW25113_1580	rspB	CP009273.1	-	1647153	1648172	6.18137	1.2816	0.88287
gene-BW25113_1581	rspA	CP009273.1	-	1648184	1649398	6.39671	1.32625	0.913626
gene-BW25113_1582	ynfA	CP009273.1	-	1649604	1649930	49.0245	10.1644	7.00204
gene-BW25113_1583	ynfB	CP009273.1	+	1650065	1650406	577.415	119.717	82.4708
gene-BW25113_1584	speG	CP009273.1	+	1650441	1651001	422.742	87.6481	60.3791
gene-BW25113_1585	ynfC	CP009273.1	-	1651004	1651714	99.7018	20.6715	14.2402
gene-BW25113_1586	ynfD	CP009273.1	+	1651822	1652127	31.6863	6.5696	4.52567
gene-BW25113_1587	ynfE	CP009273.1	+	1652326	1654752	12.2752	2.54506	1.75324
gene-BW25113_1588	ynfF	CP009273.1	+	1654813	1657236	10.7917	2.23746	1.54135
gene-BW25113_1589	ynfG	CP009273.1	+	1657247	1657864	8.04531	1.66806	1.14909
gene-BW25113_1590	ynfH	CP009273.1	+	1657866	1658720	47.345	9.81617	6.76217
gene-BW25113_1591	dmsD	CP009273.1	+	1658763	1659377	205.99	42.7085	29.4211
gene-BW25113_1592	clcB	CP009273.1	+	1659572	1660828	14.8138	3.07138	2.11581
gene-BW25113_1593	ynfK	CP009273.1	-	1660781	1661476	350.973	72.7682	50.1286
gene-BW25113_1594	mlc	CP009273.1	-	1661601	1662821	549.306	113.889	78.456
gene-BW25113_1595	ynfL	CP009273.1	-	1662956	1663849	20.981	4.35004	2.99666
gene-BW25113_1596	ynfM	CP009273.1	+	1663956	1665209	24.2656	5.03104	3.46579
gene-BW25113_1597	asr	CP009273.1	+	1665633	1665941	5.05502	1.04807	0.721995
gene-BW25113_1598	ydgD	CP009273.1	+	1666217	1667038	90.6131	18.7871	12.942
gene-BW25113_1599	mdtI	CP009273.1	-	1667077	1667406	50.9836	10.5706	7.28185
gene-BW25113_1600	mdtJ	CP009273.1	-	1667393	1667758	60.3536	12.5133	8.62016
gene-BW25113_1601	tqsA	CP009273.1	+	1668170	1669204	19.9556	4.13744	2.8502
gene-BW25113_1602	pntB	CP009273.1	-	1669229	1670617	597.936	123.972	85.4017
gene-BW25113_1603	pntA	CP009273.1	-	1670628	1672160	724.928	150.301	103.54
gene-BW25113_1604	ydgH	CP009273.1	+	1672684	1673628	806.408	167.195	115.177
gene-BW25113_1605	ydgI	CP009273.1	+	1673814	1675196	90.3565	18.7339	12.9054
gene-BW25113_1606	folM	CP009273.1	+	1675233	1675955	104.271	21.6188	14.8928
gene-BW25113_1607	ydgC	CP009273.1	-	1675952	1676287	73.0893	15.1538	10.4392
gene-BW25113_1608	rstA	CP009273.1	+	1676416	1677135	335.765	69.6151	47.9565
gene-BW25113_1609	rstB	CP009273.1	+	1677139	1678440	153.349	31.7944	21.9025
gene-BW25113_1610	tus	CP009273.1	+	1678516	1679445	91.4667	18.964	13.064
gene-BW25113_1611	fumC	CP009273.1	-	1679442	1680845	137.521	28.5127	19.6418
gene-BW25113_1612	fumA	CP009273.1	-	1680988	1682634	1247.99	258.749	178.247
gene-BW25113_1613	manA	CP009273.1	+	1682833	1684008	359.039	74.4406	51.2807
gene-BW25113_1614	ydgA	CP009273.1	+	1684109	1685617	815.182	169.014	116.43
gene-BW25113_1615	uidC	CP009273.1	-	1685843	1687108	3.41943	0.70896	0.488389
gene-BW25113_1616	uidB	CP009273.1	-	1687147	1688520	9.72042	2.01536	1.38834
gene-BW25113_1617	uidA	CP009273.1	-	1688517	1690328	27.3792	5.67661	3.91051
gene-BW25113_1618	uidR	CP009273.1	-	1690719	1691309	538.159	111.578	76.8639
gene-BW25113_1619	hdhA	CP009273.1	-	1691530	1692297	84.4844	17.5164	12.0667
gene-BW25113_1620	malI	CP009273.1	-	1692409	1693437	118.747	24.6202	16.9604
gene-BW25113_1621	malX	CP009273.1	+	1693612	1695204	116.985	24.2548	16.7087
gene-BW25113_1622	malY	CP009273.1	+	1695214	1696386	148.94	30.8802	21.2728
gene-BW25113_1623	add	CP009273.1	+	1696490	1697491	235.963	48.9229	33.702
gene-BW25113_1624	ydgJ	CP009273.1	-	1697525	1698565	214.286	44.4286	30.606
gene-BW25113_1625	cnu	CP009273.1	+	1699206	1699421	73.1343	15.1631	10.4456
gene-BW25113_1626	ydgK	CP009273.1	+	1699507	1699947	124.832	25.8818	17.8295
gene-BW25113_1627	rsxA	CP009273.1	+	1700024	1700605	111.863	23.193	15.9772
gene-BW25113_1628	rsxB	CP009273.1	+	1700605	1701183	220.293	45.674	31.464
gene-BW25113_1629	rsxC	CP009273.1	+	1701176	1703398	233.057	48.3203	33.2869
gene-BW25113_1630	rsxD	CP009273.1	+	1703399	1704457	292.313	60.606	41.7503
gene-BW25113_1631	rsxG	CP009273.1	+	1704461	1705081	299.572	62.111	42.7871
gene-BW25113_1632	rsxE	CP009273.1	+	1705085	1705780	1.14684	0.237778	0.163801
gene-BW25113_1633	nth	CP009273.1	+	1705780	1706415	329.147	68.2428	47.0112
gene-BW25113_1634	dtpA	CP009273.1	+	1707026	1708528	1971.73	408.805	281.618
gene-BW25113_1635	gstA	CP009273.1	+	1708634	1709239	126.378	26.2023	18.0502
gene-BW25113_1636	pdxY	CP009273.1	-	1709283	1710146	490.535	101.704	70.0618
gene-BW25113_1637	tyrS	CP009273.1	-	1710205	1711479	1691.61	350.726	241.608
gene-BW25113_1638	pdxH	CP009273.1	-	1711608	1712264	326.989	67.7956	46.7031
gene-BW25113_1639	mliC	CP009273.1	-	1712323	1712652	35.9212	7.44764	5.13054
gene-BW25113_1640	anmK	CP009273.1	-	1712750	1713859	78.9766	16.3744	11.28
gene-BW25113_1641	slyB	CP009273.1	+	1714133	1714600	4625.2	958.956	660.606
gene-BW25113_1642	slyA	CP009273.1	-	1714647	1715081	913.445	189.387	130.465
gene-BW25113_1643	ydhI	CP009273.1	+	1715282	1715518	40.5063	8.39829	5.78542
gene-BW25113_1644	ydhJ	CP009273.1	+	1715521	1716378	0.596145	0.1236	0.085146
gene-BW25113_1645	ydhK	CP009273.1	+	1716378	1718390	27.0433	5.60697	3.86253
gene-BW25113_1646	sodC	CP009273.1	-	1718391	1718912	144.768	30.0152	20.6769
gene-BW25113_1647	ydhF	CP009273.1	-	1718993	1719889	369.361	76.5807	52.7549
gene-BW25113_1648	ydhL	CP009273.1	-	1719938	1720177	29.7708	6.17247	4.25209
gene-BW25113_1649	nemR	CP009273.1	+	1720280	1720879	69.0572	14.3178	9.86326
gene-BW25113_1650	nemA	CP009273.1	+	1720916	1722013	240.556	49.8752	34.3581
gene-BW25113_1651	gloA	CP009273.1	+	1722094	1722501	782.706	162.281	111.792
gene-BW25113_1652	rnt	CP009273.1	+	1722604	1723251	254.949	52.8593	36.4137
gene-BW25113_1653	lhr	CP009273.1	+	1723344	1727960	37.2452	7.72214	5.31964
gene-BW25113_1654	grxD	CP009273.1	-	1728011	1728358	2077.99	430.836	296.795
gene-BW25113_1655	mepH	CP009273.1	+	1728692	1729507	175.594	36.4065	25.0797
gene-BW25113_1656	sodB	CP009273.1	+	1729635	1730216	2977.8	617.396	425.312
gene-BW25113_1657	ydhP	CP009273.1	-	1730378	1731547	32.6077	6.76064	4.65728
gene-BW25113_1658	purR	CP009273.1	+	1732101	1733126	688.867	142.825	98.3891
gene-BW25113_1659	ydhB	CP009273.1	-	1733123	1734055	56.4579	11.7056	8.06374
gene-BW25113_1660	ydhC	CP009273.1	+	1734168	1735379	84.1089	17.4385	12.0131
gene-BW25113_1661	cfa	CP009273.1	+	1735670	1736818	131.922	27.3517	18.842
gene-BW25113_1662	ribC	CP009273.1	-	1736858	1737499	669.639	138.838	95.6428
gene-BW25113_1663	mdtK	CP009273.1	+	1737714	1739087	137.233	28.4529	19.6006
gene-BW25113_1664	ydhQ	CP009273.1	-	1739128	1740384	507.658	105.254	72.5075
gene-BW25113_1665	valV	CP009273.1	+	1740692	1740768	120.987	25.0846	17.2803
gene-BW25113_1666	valW	CP009273.1	+	1740773	1740849	119.623	24.8018	17.0855
gene-BW25113_1667	ydhR	CP009273.1	+	1740957	1741262	354.232	73.4439	50.5941
gene-BW25113_1668	ydhS	CP009273.1	+	1741388	1742992	12.6106	2.61459	1.80114
gene-BW25113_1669	ydhT	CP009273.1	-	1743004	1743816	5.29766	1.09838	0.756652
gene-BW25113_1670	ydhU	CP009273.1	-	1743820	1744605	6.71247	1.39171	0.958725
gene-BW25113_1671	ydhX	CP009273.1	-	1744602	1745270	6.54858	1.35773	0.935317
gene-BW25113_1672	ydhW	CP009273.1	-	1745334	1745981	7.56944	1.56939	1.08112
gene-BW25113_1673	ydhV	CP009273.1	-	1745985	1748087	3.83642	0.795416	0.547947
gene-BW25113_1674	ydhY	CP009273.1	-	1748108	1748734	4.38277	0.908693	0.625981
gene-BW25113_1675	ydhZ	CP009273.1	-	1749189	1749398	153.805	31.8888	21.9675
gene-BW25113_1676	pykF	CP009273.1	+	1749955	1751367	2382.33	493.935	340.262
gene-BW25113_1677	lpp	CP009273.1	+	1751678	1751914	19399.9	4022.23	2770.84
gene-BW25113_1678	ldtE	CP009273.1	-	1751978	1752982	58.8318	12.1978	8.4028
gene-BW25113_1679	sufE	CP009273.1	-	1753131	1753547	71.6115	14.8474	10.2281
gene-BW25113_1680	sufS	CP009273.1	-	1753560	1754780	91.1728	18.9031	13.022
gene-BW25113_1681	sufD	CP009273.1	-	1754777	1756048	105.217	21.815	15.0279
gene-BW25113_1682	sufC	CP009273.1	-	1756023	1756769	123.642	25.635	17.6595
gene-BW25113_1683	sufB	CP009273.1	-	1756779	1758266	146.81	30.4386	20.9686
gene-BW25113_1684	sufA	CP009273.1	-	1758275	1758643	137.886	28.5883	19.6939
gene-BW25113_1685	ydiH	CP009273.1	-	1759191	1759379	53.8254	11.1598	7.68775
gene-BW25113_1686	menI	CP009273.1	-	1759479	1759889	107.36	22.2592	15.3339
gene-BW25113_1687	ydiJ	CP009273.1	-	1759886	1762942	92.4093	19.1595	13.1986
gene-BW25113_1688	ydiK	CP009273.1	+	1763331	1764443	157.72	32.7004	22.5267
gene-BW25113_1689	ydiL	CP009273.1	+	1764872	1765228	10.6162	2.2011	1.51629
gene-BW25113_1690	ydiM	CP009273.1	+	1765328	1766542	3.93722	0.816314	0.562343
gene-BW25113_1691	ydiN	CP009273.1	+	1766769	1768034	2.7267	0.565334	0.389447
gene-BW25113_1692	ydiB	CP009273.1	+	1768046	1768912	11.6086	2.40684	1.65802
gene-BW25113_1693	aroD	CP009273.1	+	1768943	1769701	82.4256	17.0895	11.7726
gene-BW25113_1694	ydiF	CP009273.1	+	1769844	1771439	5.59398	1.15982	0.798975
gene-BW25113_1695	ydiO	CP009273.1	+	1771453	1772604	4.83333	1.00211	0.690333
gene-BW25113_1696	ydiP	CP009273.1	-	1772647	1773558	16.0263	3.32278	2.289
gene-BW25113_1697	ydiQ	CP009273.1	+	1773874	1774638	3.63791	0.754257	0.519593
gene-BW25113_1698	ydiR	CP009273.1	+	1774658	1775596	4.69968	0.974397	0.671244
gene-BW25113_1699	ydiS	CP009273.1	+	1775652	1776941	5.587	1.15837	0.797977
gene-BW25113_1700	ydiT	CP009273.1	+	1776938	1777231	5.05024	1.04708	0.721313
gene-BW25113_1701	fadK	CP009273.1	+	1777288	1778934	4.43352	0.919213	0.633228
gene-BW25113_1702	ppsA	CP009273.1	-	1778991	1781369	347.493	72.0468	49.6316
gene-BW25113_1703	ppsR	CP009273.1	+	1781702	1782535	68.313	14.1635	9.75697
gene-BW25113_1704	aroH	CP009273.1	+	1782692	1783738	188.285	39.0376	26.8922
gene-BW25113_1705	ydiE	CP009273.1	+	1783870	1784061	250.193	51.8731	35.7344
gene-BW25113_1706	ydiU	CP009273.1	-	1784065	1785501	261.099	54.1343	37.2921
gene-BW25113_1707	ydiV	CP009273.1	-	1785564	1786277	34.5994	7.17359	4.94175
gene-BW25113_1708	nlpC	CP009273.1	-	1786524	1786988	188.097	38.9986	26.8654
gene-BW25113_1709	btuD	CP009273.1	-	1787066	1787815	0.445402	0.092346	0.063616
gene-BW25113_1710	btuE	CP009273.1	-	1787815	1788366	191.428	39.6893	27.3412
gene-BW25113_1711	btuC	CP009273.1	-	1788429	1789409	91.2538	18.9199	13.0336
gene-BW25113_1712	ihfA	CP009273.1	-	1789510	1789809	8232.09	1706.78	1175.77
gene-BW25113_1713	pheT	CP009273.1	-	1789814	1792201	4671.34	968.521	667.195
gene-BW25113_1714	pheS	CP009273.1	-	1792216	1793199	3695.29	766.155	527.79
gene-BW25113_1715	pheM	CP009273.1	-	1793483	1793527	141.8	29.3998	20.2529
gene-BW25113_1716	rplT	CP009273.1	-	1793650	1794006	44427.8	9211.35	6345.52
gene-BW25113_1717	rpmI	CP009273.1	-	1794059	1794256	69381.9	14385.1	9909.64
gene-BW25113_1718	infC	CP009273.1	-	1794353	1794895	43072.4	8930.31	6151.92
gene-BW25113_1719	thrS	CP009273.1	-	1794899	1796827	5541.48	1148.93	791.476
gene-BW25113_1722	ydiY	CP009273.1	-	1799582	1800340	383.045	79.4177	54.7093
gene-BW25113_1723	pfkB	CP009273.1	+	1800627	1801556	108.946	22.5881	15.5605
gene-BW25113_1724	ydiZ	CP009273.1	+	1801657	1801947	52.0344	10.7884	7.43194
gene-BW25113_1725	yniA	CP009273.1	+	1802053	1802913	112.042	23.2299	16.0026
gene-BW25113_1726	yniB	CP009273.1	-	1802954	1803490	193.155	40.0473	27.5878
gene-BW25113_1727	yniC	CP009273.1	+	1803637	1804305	290.338	60.1965	41.4682
gene-BW25113_1728	ydjM	CP009273.1	+	1804468	1805058	90.9103	18.8487	12.9845
gene-BW25113_1729	ydjN	CP009273.1	+	1805191	1806582	171.074	35.4692	24.4341
gene-BW25113_1730	ydjO	CP009273.1	-	1806586	1807389	3.20522	0.664548	0.457794
gene-BW25113_1731	cedA	CP009273.1	-	1807678	1807920	112.152	23.2528	16.0184
gene-BW25113_1732	katE	CP009273.1	+	1808124	1810385	8.14633	1.689	1.16352
gene-BW25113_1733	chbG	CP009273.1	-	1810643	1811392	51.4867	10.6749	7.35371
gene-BW25113_1734	chbF	CP009273.1	-	1811405	1812757	24.9756	5.17826	3.5672
gene-BW25113_1735	chbR	CP009273.1	-	1812862	1813704	65.0961	13.4965	9.29751
gene-BW25113_1736	chbA	CP009273.1	-	1813712	1814062	81.9003	16.9806	11.6976
gene-BW25113_1737	chbC	CP009273.1	-	1814113	1815471	40.1656	8.32764	5.73675
gene-BW25113_1738	chbB	CP009273.1	-	1815556	1815876	283.022	58.6797	40.4233
gene-BW25113_1739	osmE	CP009273.1	-	1816175	1816513	196.416	40.7234	28.0536
gene-BW25113_1740	nadE	CP009273.1	+	1816715	1817542	539.525	111.861	77.0591
gene-BW25113_1741	cho	CP009273.1	+	1817772	1818659	42.6081	8.83406	6.08561
gene-BW25113_1742	ves	CP009273.1	-	1818619	1819194	8.37326	1.73605	1.19593
gene-BW25113_1743	spy	CP009273.1	-	1819397	1819882	89.9465	18.6489	12.8468
gene-BW25113_1744	astE	CP009273.1	-	1820212	1821180	3.04245	0.630799	0.434545
gene-BW25113_1745	astB	CP009273.1	-	1821173	1822516	0.948823	0.196722	0.135518
gene-BW25113_1746	astD	CP009273.1	-	1822513	1823991	8.48414	1.75904	1.21177
gene-BW25113_1747	astA	CP009273.1	-	1823988	1825022	7.60866	1.57752	1.08673
gene-BW25113_1748	astC	CP009273.1	-	1825019	1826239	10.9926	2.27913	1.57005
gene-BW25113_1749	xthA	CP009273.1	+	1826685	1827491	456.275	94.6007	65.1686
gene-BW25113_1750	ydjX	CP009273.1	+	1827658	1828368	34.4726	7.14729	4.92363
gene-BW25113_1751	ydjY	CP009273.1	+	1828373	1829050	42.9499	8.90491	6.13442
gene-BW25113_1752	ydjZ	CP009273.1	+	1829065	1829772	23.3622	4.84374	3.33676
gene-BW25113_1753	ynjA	CP009273.1	+	1829772	1830320	25.4405	5.27465	3.6336
gene-BW25113_1754	ynjB	CP009273.1	+	1830330	1831496	26.5145	5.49732	3.787
gene-BW25113_1755	ynjC	CP009273.1	+	1831469	1833004	9.59641	1.98965	1.37063
gene-BW25113_1756	ynjD	CP009273.1	+	1833004	1833657	26.0977	5.41091	3.72747
gene-BW25113_1757	ynjE	CP009273.1	+	1833724	1835031	63.2829	13.1206	9.03854
gene-BW25113_1758	ynjF	CP009273.1	-	1835040	1835660	36.8406	7.63826	5.26185
gene-BW25113_1759	nudG	CP009273.1	+	1835747	1836154	66.0907	13.7028	9.43957
gene-BW25113_1760	ynjH	CP009273.1	-	1836120	1836392	34.3114	7.11387	4.90061
gene-BW25113_1761	gdhA	CP009273.1	+	1836628	1837971	291.39	60.4147	41.6185
gene-BW25113_1762	ynjI	CP009273.1	-	1838088	1839128	41.3381	8.57075	5.90422
gene-BW25113_1763	topB	CP009273.1	-	1839256	1841217	635.987	131.861	90.8365
gene-BW25113_1764	selD	CP009273.1	-	1841222	1842265	1165.52	241.651	166.469
gene-BW25113_1765	ydjA	CP009273.1	-	1842382	1842933	570.877	118.361	81.5369
gene-BW25113_1766	sppA	CP009273.1	+	1843094	1844950	379.594	78.7022	54.2165
gene-BW25113_1767	ansA	CP009273.1	+	1845117	1846133	488.214	101.223	69.7304
gene-BW25113_1768	pncA	CP009273.1	+	1846144	1846785	503.438	104.379	71.9047
gene-BW25113_1769	ydjE	CP009273.1	-	1846878	1848236	13.4356	2.78564	1.91898
gene-BW25113_1770	ydjF	CP009273.1	-	1848353	1849111	176.578	36.6105	25.2202
gene-BW25113_1771	ydjG	CP009273.1	-	1849248	1850228	28.0836	5.82265	4.01111
gene-BW25113_1772	ydjH	CP009273.1	-	1850238	1851185	19.5369	4.05064	2.79041
gene-BW25113_1773	ydjI	CP009273.1	-	1851190	1852026	21.1004	4.37479	3.01371
gene-BW25113_1774	ydjJ	CP009273.1	-	1852047	1853090	11.5364	2.39187	1.64772
gene-BW25113_1775	ydjK	CP009273.1	-	1853107	1854486	10.4254	2.16152	1.48903
gene-BW25113_1776	ydjL	CP009273.1	-	1854513	1855589	36.4754	7.56254	5.20969
gene-BW25113_1777	yeaC	CP009273.1	-	1855959	1856231	1038.29	215.271	148.296
gene-BW25113_1778	msrB	CP009273.1	-	1856273	1856686	1129.87	234.259	161.376
gene-BW25113_1779	gapA	CP009273.1	+	1857028	1858023	24127.2	5002.35	3446.02
gene-BW25113_1780	yeaD	CP009273.1	+	1858107	1858991	357.692	74.1612	51.0882
gene-BW25113_1781	yeaE	CP009273.1	-	1859039	1859893	154.975	32.1315	22.1348
gene-BW25113_1782	mipA	CP009273.1	-	1859983	1860729	1878.18	389.408	268.255
gene-BW25113_1783	yeaG	CP009273.1	+	1861165	1863099	17.708	3.67145	2.52919
gene-BW25113_1784	yeaH	CP009273.1	+	1863212	1864495	6.28173	1.30241	0.897203
gene-BW25113_1785	yeaI	CP009273.1	+	1864642	1866117	3.49381	0.724382	0.499013
gene-BW25113_1786	yeaJ	CP009273.1	+	1866298	1867788	60.0751	12.4555	8.58038
gene-BW25113_1787	yeaK	CP009273.1	+	1867831	1868334	220.812	45.7814	31.538
gene-BW25113_1788	yoaI	CP009273.1	-	1868335	1868439	48.2476	10.0033	6.89109
gene-BW25113_1789	yeaL	CP009273.1	+	1868609	1869055	66.4362	13.7744	9.48892
gene-BW25113_1790	yeaM	CP009273.1	-	1869012	1869833	39.2032	8.1281	5.59929
gene-BW25113_1791	yeaN	CP009273.1	+	1869930	1871111	34.2919	7.10983	4.89782
gene-BW25113_1792	yeaO	CP009273.1	+	1871166	1871513	119.621	24.8013	17.0851
gene-BW25113_1793	yoaF	CP009273.1	-	1871535	1871789	114.42	23.7229	16.3423
gene-BW25113_1794	yeaP	CP009273.1	+	1871972	1872997	156.111	32.3669	22.297
gene-BW25113_1795	yeaQ	CP009273.1	-	1873264	1873512	116.843	24.2255	16.6884
gene-BW25113_1796	yoaG	CP009273.1	-	1873660	1873842	14.4372	2.99329	2.06202
gene-BW25113_1797	yeaR	CP009273.1	-	1873846	1874205	16.8722	3.49816	2.40982
gene-BW25113_1798	leuE	CP009273.1	-	1874378	1875016	130.016	26.9565	18.5698
gene-BW25113_1799	dmlR	CP009273.1	-	1875143	1876066	133.733	27.7272	19.1007
gene-BW25113_1800	dmlA	CP009273.1	+	1876169	1877254	15.6252	3.23962	2.23171
gene-BW25113_1801	yeaV	CP009273.1	+	1877445	1878890	6.90456	1.43154	0.986162
gene-BW25113_1802	yeaW	CP009273.1	+	1878922	1880046	9.19911	1.90728	1.31389
gene-BW25113_1803	yeaX	CP009273.1	+	1880102	1881067	16.5663	3.43473	2.36612
gene-BW25113_1804	rnd	CP009273.1	-	1881121	1882248	366.819	76.0536	52.3919
gene-BW25113_1805	fadD	CP009273.1	-	1882318	1884003	293.001	60.7487	41.8486
gene-BW25113_1806	yeaY	CP009273.1	-	1884208	1884789	514.596	106.693	73.4985
gene-BW25113_1807	tsaB	CP009273.1	-	1884829	1885524	472.205	97.9036	67.4439
gene-BW25113_1808	yoaA	CP009273.1	-	1885582	1887492	136.997	28.404	19.567
gene-BW25113_1809	yoaB	CP009273.1	+	1887624	1887968	790.62	163.921	112.922
gene-BW25113_1810	yoaC	CP009273.1	+	1888390	1888689	101.493	21.0429	14.496
gene-BW25113_1811	yoaH	CP009273.1	-	1888809	1888988	282.728	58.6187	40.3813
gene-BW25113_1812	pabB	CP009273.1	+	1889062	1890423	89.442	18.5443	12.7748
gene-BW25113_1813	nudL	CP009273.1	+	1890427	1891005	103.67	21.4942	14.8069
gene-BW25113_1814	sdaA	CP009273.1	+	1891189	1892553	744.511	154.362	106.337
gene-BW25113_1815	yoaD	CP009273.1	+	1892684	1894282	11.4228	2.36831	1.63149
gene-BW25113_1816	yoaE	CP009273.1	-	1894286	1895842	139.647	28.9533	19.9454
gene-BW25113_1817	manX	CP009273.1	+	1896305	1897276	3751.86	777.884	535.869
gene-BW25113_1818	manY	CP009273.1	+	1897339	1898139	2691.45	558.027	384.414
gene-BW25113_1819	manZ	CP009273.1	+	1898152	1899003	2488.73	515.996	355.46
gene-BW25113_1820	yobD	CP009273.1	+	1899058	1899516	144.662	29.9932	20.6618
gene-BW25113_1821	mntP	CP009273.1	+	1899945	1900511	27.5926	5.72085	3.94098
gene-BW25113_1822	rlmA	CP009273.1	-	1900508	1901317	250.38	51.912	35.7612
gene-BW25113_1823	cspC	CP009273.1	-	1901483	1901692	15324.8	3177.34	2188.81
gene-BW25113_1824	yobF	CP009273.1	-	1901705	1901848	22848.5	4737.24	3263.39
gene-BW25113_1825	yebO	CP009273.1	-	1902518	1902805	1024.61	212.435	146.342
gene-BW25113_1826	mgrB	CP009273.1	-	1902880	1903023	903.007	187.223	128.974
gene-BW25113_1827	kdgR	CP009273.1	-	1903565	1904356	635.136	131.685	90.7149
gene-BW25113_1828	yebQ	CP009273.1	+	1904533	1905906	27.3093	5.66212	3.90052
gene-BW25113_1829	htpX	CP009273.1	-	1905952	1906833	748.918	155.275	106.966
gene-BW25113_1830	prc	CP009273.1	-	1907025	1909073	1300.11	269.555	185.691
gene-BW25113_1831	proQ	CP009273.1	-	1909093	1909791	4500.73	933.149	642.828
gene-BW25113_1832	msrC	CP009273.1	-	1909888	1910385	975.382	202.228	139.311
gene-BW25113_1833	yebS	CP009273.1	+	1910515	1911798	65.8319	13.6491	9.40261
gene-BW25113_1834	yebT	CP009273.1	+	1911767	1914400	93.1639	19.3159	13.3064
gene-BW25113_1835	rsmF	CP009273.1	+	1914480	1915919	118.749	24.6206	16.9607
gene-BW25113_1836	yebV	CP009273.1	+	1916037	1916273	56.6582	11.7471	8.09235
gene-BW25113_1837	yebW	CP009273.1	+	1916378	1916569	73.0208	15.1396	10.4294
gene-BW25113_1838	pphA	CP009273.1	-	1916570	1917226	20.5632	4.26342	2.93698
gene-BW25113_1839	yebY	CP009273.1	-	1917622	1917963	767.395	159.106	109.605
gene-BW25113_1840	yebZ	CP009273.1	-	1917976	1918848	511.839	106.121	73.1046
gene-BW25113_1841	yobA	CP009273.1	-	1918852	1919226	780.84	161.894	111.525
gene-BW25113_1842	holE	CP009273.1	+	1919365	1919595	243.745	50.5362	34.8134
gene-BW25113_1843	yobB	CP009273.1	+	1919697	1920353	69.6027	14.4309	9.94118
gene-BW25113_1844	exoX	CP009273.1	+	1920377	1921039	105.35	21.8425	15.0469
gene-BW25113_1845	ptrB	CP009273.1	-	1921036	1923096	53.5575	11.1042	7.64948
gene-BW25113_1846	yebE	CP009273.1	-	1923305	1923964	62.8106	13.0227	8.97108
gene-BW25113_1847	yebF	CP009273.1	-	1924291	1924647	294.557	61.0714	42.0709
gene-BW25113_1848	yebG	CP009273.1	-	1924714	1925004	477.223	98.944	68.1606
gene-BW25113_1849	purT	CP009273.1	+	1925138	1926316	22.4377	4.65206	3.20472
gene-BW25113_1850	eda	CP009273.1	-	1926372	1927013	888.646	184.245	126.923
gene-BW25113_1851	edd	CP009273.1	-	1927050	1928861	277.187	57.4698	39.5899
gene-BW25113_1852	zwf	CP009273.1	-	1929096	1930571	829.744	172.033	118.51
gene-BW25113_1853	yebK	CP009273.1	+	1930909	1931778	891.132	184.761	127.278
gene-BW25113_1854	pykA	CP009273.1	+	1931906	1933348	1587.68	329.179	226.765
gene-BW25113_1855	lpxM	CP009273.1	-	1933479	1934450	456.852	94.7203	65.251
gene-BW25113_1856	mepM	CP009273.1	-	1934570	1935892	544.042	112.798	77.7041
gene-BW25113_1857	znuA	CP009273.1	-	1935908	1936840	644.357	133.596	92.0319
gene-BW25113_1858	znuC	CP009273.1	+	1936919	1937674	158.258	32.8121	22.6036
gene-BW25113_1859	znuB	CP009273.1	+	1937671	1938456	111.873	23.1949	15.9785
gene-BW25113_1860	ruvB	CP009273.1	-	1938603	1939613	228.581	47.3922	32.6476
gene-BW25113_1861	ruvA	CP009273.1	-	1939622	1940233	277.779	57.5928	39.6745
gene-BW25113_1862	yebB	CP009273.1	+	1940508	1941110	9.93035	2.05889	1.41833
gene-BW25113_1863	ruvC	CP009273.1	-	1941112	1941633	1681.98	348.73	240.233
gene-BW25113_1864	yebC	CP009273.1	-	1941668	1942408	2461.83	510.419	351.618
gene-BW25113_1865	nudB	CP009273.1	-	1942437	1942889	1716.18	355.82	245.118
gene-BW25113_1866	aspS	CP009273.1	-	1943007	1944779	1829.48	379.311	261.3
gene-BW25113_1867	yecD	CP009273.1	+	1945089	1945655	223.527	46.3445	31.9259
gene-BW25113_1868	yecE	CP009273.1	+	1945652	1946470	76.6496	15.892	10.9477
gene-BW25113_1869	yecN	CP009273.1	+	1946523	1946918	267.182	55.3955	38.1609
gene-BW25113_1870	cmoA	CP009273.1	+	1946959	1947702	301.453	62.501	43.0557
gene-BW25113_1871	cmoB	CP009273.1	+	1947699	1948670	321.127	66.5801	45.8657
gene-BW25113_1872	torZ	CP009273.1	-	1948835	1951264	15.1247	3.13584	2.16022
gene-BW25113_1873	torY	CP009273.1	-	1951289	1952389	4.61853	0.957572	0.659653
gene-BW25113_1874	cutC	CP009273.1	-	1952777	1953523	164.726	34.153	23.5273
gene-BW25113_1875	yecM	CP009273.1	-	1953537	1954103	185.522	38.4648	26.4977
gene-BW25113_1876	argS	CP009273.1	+	1954319	1956052	782.273	162.191	111.73
gene-BW25113_1877	yecT	CP009273.1	+	1956229	1956717	30.8384	6.39382	4.40458
gene-BW25113_1878	flhE	CP009273.1	-	1956837	1957229	46.2629	9.59181	6.60761
gene-BW25113_1879	flhA	CP009273.1	-	1957229	1959307	55.7899	11.5671	7.96833
gene-BW25113_1880	flhB	CP009273.1	-	1959300	1960448	42.2887	8.76782	6.03998
gene-BW25113_1881	cheZ	CP009273.1	-	1960650	1961294	16.924	3.5089	2.41722
gene-BW25113_1882	cheY	CP009273.1	-	1961305	1961694	20.8179	4.31624	2.97338
gene-BW25113_1883	cheB	CP009273.1	-	1961709	1962758	7.07048	1.46594	1.00986
gene-BW25113_1884	cheR	CP009273.1	-	1962761	1963621	4.34727	0.901331	0.62091
gene-BW25113_1885	tap	CP009273.1	-	1963640	1965241	4.03246	0.836061	0.575946
gene-BW25113_1886	tar	CP009273.1	-	1965287	1966948	4.59386	0.952458	0.65613
gene-BW25113_1887	cheW	CP009273.1	-	1967093	1967596	17.8968	3.7106	2.55616
gene-BW25113_1888	cheA	CP009273.1	-	1967617	1969581	13.1445	2.72529	1.8774
gene-BW25113_1889	motB	CP009273.1	-	1969586	1970512	10.9219	2.26447	1.55995
gene-BW25113_1890	motA	CP009273.1	-	1970509	1971396	12.3259	2.55556	1.76048
gene-BW25113_1891	flhC	CP009273.1	-	1971523	1972101	201.779	41.8354	28.8196
gene-BW25113_1892	flhD	CP009273.1	-	1972104	1972454	227.219	47.11	32.4532
gene-BW25113_1895	uspC	CP009273.1	+	1973234	1973662	107.084	22.202	15.2945
gene-BW25113_1896	otsA	CP009273.1	-	1973669	1975093	25.6034	5.30843	3.65687
gene-BW25113_1897	otsB	CP009273.1	-	1975068	1975868	11.7979	2.44609	1.68506
gene-BW25113_1900	araG	CP009273.1	-	1977036	1978550	14.5795	3.02282	2.08236
gene-BW25113_1901	araF	CP009273.1	-	1978620	1979609	9.31313	1.93092	1.33017
gene-BW25113_1902	ftnB	CP009273.1	+	1980406	1980909	147.617	30.6058	21.0838
gene-BW25113_1904	yecR	CP009273.1	+	1981703	1982026	112.213	23.2654	16.0271
gene-BW25113_1905	ftnA	CP009273.1	+	1982197	1982694	588.305	121.975	84.0262
gene-BW25113_1906	yecH	CP009273.1	-	1982732	1982971	96.625	20.0335	13.8007
gene-BW25113_1907	tyrP	CP009273.1	+	1983162	1984373	111.922	23.2052	15.9856
gene-BW25113_1908	yecA	CP009273.1	-	1984435	1985100	505.413	104.789	72.1869
gene-BW25113_1909	leuZ	CP009273.1	-	1985296	1985382	2807.92	582.174	401.048
gene-BW25113_1910	cysT	CP009273.1	-	1985395	1985468	3045.97	631.53	435.049
gene-BW25113_1911	glyW	CP009273.1	-	1985523	1985598	3834.56	795.03	547.681
gene-BW25113_1912	pgsA	CP009273.1	-	1985750	1986298	368.721	76.448	52.6635
gene-BW25113_1913	uvrC	CP009273.1	-	1986355	1988187	395.318	81.9624	56.4623
gene-BW25113_1914	uvrY	CP009273.1	-	1988184	1988840	673.48	139.634	96.1914
gene-BW25113_1915	yecF	CP009273.1	+	1989299	1989523	405.556	84.0849	57.9245
gene-BW25113_1916	sdiA	CP009273.1	-	1989591	1990313	384.517	79.723	54.9196
gene-BW25113_1917	yecC	CP009273.1	-	1990543	1991295	80.5305	16.6966	11.502
gene-BW25113_1918	yecS	CP009273.1	-	1991292	1991960	84.651	17.5509	12.0905
gene-BW25113_1919	dcyD	CP009273.1	-	1991975	1992961	109.111	22.6224	15.5841
gene-BW25113_1920	fliY	CP009273.1	-	1993066	1993866	270.18	56.0171	38.5891
gene-BW25113_1921	fliZ	CP009273.1	-	1993954	1994505	133.826	27.7465	19.114
gene-BW25113_1922	fliA	CP009273.1	-	1994551	1995270	268.853	55.742	38.3996
gene-BW25113_1923	fliC	CP009273.1	-	1995591	1997087	96.521	20.012	13.7859
gene-BW25113_1924	fliD	CP009273.1	+	1997353	1998759	37.3013	7.73379	5.32766
gene-BW25113_1925	fliS	CP009273.1	+	1998784	1999194	48.0767	9.96787	6.86667
gene-BW25113_1926	fliT	CP009273.1	+	1999194	1999559	33.1899	6.88134	4.74042
gene-BW25113_1927	amyA	CP009273.1	+	1999637	2001124	41.3776	8.57893	5.90986
gene-BW25113_1928	yedD	CP009273.1	-	2001158	2001571	619.619	128.467	88.4986
gene-BW25113_1929	yedE	CP009273.1	+	2001758	2002963	329.699	68.3575	47.0901
gene-BW25113_1930	yedF	CP009273.1	+	2002960	2003193	503.537	104.4	71.9189
gene-BW25113_1931	yedK	CP009273.1	+	2003302	2003970	8.89836	1.84492	1.27093
gene-BW25113_1932	yedL	CP009273.1	+	2004081	2004560	6.52083	1.35198	0.931354
gene-BW25113_1936	intG	CP009273.1	+	2005983	2006144	48.1975	9.99292	6.88393
gene-BW25113_1937	fliE	CP009273.1	-	2006181	2006495	130.756	27.1099	18.6755
gene-BW25113_1938	fliF	CP009273.1	+	2006710	2008368	212.092	43.9736	30.2926
gene-BW25113_1939	fliG	CP009273.1	+	2008361	2009356	246.432	51.0934	35.1973
gene-BW25113_1940	fliH	CP009273.1	+	2009349	2010035	3.1826	0.659857	0.454563
gene-BW25113_1941	fliI	CP009273.1	+	2010035	2011408	124.906	25.8971	17.84
gene-BW25113_1942	fliJ	CP009273.1	+	2011427	2011870	114.027	23.6416	16.2862
gene-BW25113_1943	fliK	CP009273.1	+	2011867	2012994	78.2835	16.2307	11.181
gene-BW25113_1944	fliL	CP009273.1	+	2013099	2013563	578.11	119.861	82.57
gene-BW25113_1945	fliM	CP009273.1	+	2013568	2014572	394.656	81.8251	56.3677
gene-BW25113_1946	fliN	CP009273.1	+	2014569	2014982	342.308	70.9717	48.891
gene-BW25113_1947	fliO	CP009273.1	+	2014985	2015350	148.572	30.8039	21.2202
gene-BW25113_1948	fliP	CP009273.1	+	2015350	2016087	73.5072	15.2405	10.4989
gene-BW25113_1949	fliQ	CP009273.1	+	2016097	2016366	91.1259	18.8934	13.0153
gene-BW25113_1950	fliR	CP009273.1	+	2016374	2017159	28.1387	5.83407	4.01898
gene-BW25113_1951	rcsA	CP009273.1	+	2017449	2018072	32.6619	6.77187	4.66501
gene-BW25113_1952	dsrB	CP009273.1	-	2018116	2018304	232.862	48.28	33.2592
gene-BW25113_1953	yodD	CP009273.1	+	2018467	2018694	18.9518	3.92932	2.70683
gene-BW25113_1954	dsrA	CP009273.1	-	2018708	2018794	2.1954	0.455179	0.313564
gene-BW25113_1955	yedP	CP009273.1	+	2018992	2019807	12.1654	2.52229	1.73756
gene-BW25113_1956	yedQ	CP009273.1	-	2019804	2021498	38.3634	7.95399	5.47935
gene-BW25113_1957	yodC	CP009273.1	-	2021669	2021851	239.918	49.7429	34.2669
gene-BW25113_1958	yedI	CP009273.1	-	2021930	2022847	213.118	44.1863	30.4391
gene-BW25113_1959	yedA	CP009273.1	+	2023020	2023940	47.6102	9.87115	6.80005
gene-BW25113_1960	vsr	CP009273.1	-	2023929	2024399	98.9272	20.5108	14.1295
gene-BW25113_1961	dcm	CP009273.1	-	2024380	2025798	180.725	37.4703	25.8126
gene-BW25113_1962	yedJ	CP009273.1	-	2025865	2026560	103.552	21.4697	14.79
gene-BW25113_1963	yedR	CP009273.1	-	2026600	2026965	11.355	2.35426	1.6218
gene-BW25113_1967	hchA	CP009273.1	+	2029316	2030167	28.9824	6.009	4.13948
gene-BW25113_1968	yedV	CP009273.1	-	2030275	2031633	46.3195	9.60355	6.6157
gene-BW25113_1969	yedW	CP009273.1	-	2031633	2032304	83.4542	17.3028	11.9195
gene-BW25113_1970	hiuH	CP009273.1	+	2032437	2032850	9.45411	1.96015	1.35031
gene-BW25113_1971	yedY	CP009273.1	+	2032959	2033963	15.4896	3.21149	2.21233
gene-BW25113_1972	yedZ	CP009273.1	+	2033964	2034599	16.6997	3.46239	2.38517
gene-BW25113_1973	zinT	CP009273.1	+	2034856	2035506	26.9831	5.59448	3.85393
gene-BW25113_1974	yodB	CP009273.1	+	2035849	2036379	16.8795	3.49967	2.41085
gene-BW25113_1975	serU	CP009273.1	-	2036949	2037038	527.556	109.38	75.3494
gene-BW25113_1976	mtfA	CP009273.1	+	2037132	2037929	254.209	52.7059	36.3081
gene-BW25113_1977	asnT	CP009273.1	+	2038030	2038105	81.1447	16.824	11.5897
gene-BW25113_1978	yeeJ	CP009273.1	+	2038419	2045495	16.0602	3.3298	2.29384
gene-BW25113_1981	shiA	CP009273.1	+	2047124	2048440	113.537	23.5399	16.2162
gene-BW25113_1982	amn	CP009273.1	+	2048542	2049996	208.517	43.2324	29.7819
gene-BW25113_1983	yeeN	CP009273.1	+	2050339	2051055	1049.4	217.575	149.883
gene-BW25113_1984	asnW	CP009273.1	-	2051508	2051583	13	2.69532	1.85676
gene-BW25113_1985	yeeO	CP009273.1	-	2051684	2053171	14.0793	2.9191	2.01091
gene-BW25113_1986	asnU	CP009273.1	+	2053332	2053407	24.3158	5.04146	3.47296
gene-BW25113_1987	cbl	CP009273.1	-	2053445	2054395	21.489	4.45536	3.06921
gene-BW25113_1988	nac	CP009273.1	-	2054497	2055414	9.1122	1.88926	1.30147
gene-BW25113_1989	asnV	CP009273.1	+	2055741	2055816	8.64474	1.79234	1.23471
gene-BW25113_1990	ldtA	CP009273.1	-	2055872	2056804	57.5959	11.9415	8.22628
gene-BW25113_1991	cobT	CP009273.1	-	2056869	2057948	99.5991	20.6501	14.2255
gene-BW25113_1992	cobS	CP009273.1	-	2057960	2058703	61.1458	12.6775	8.7333
gene-BW25113_1993	cobU	CP009273.1	-	2058700	2059245	110.164	22.8406	15.7344
gene-BW25113_1994	insH1	CP009273.1	-	2059786	2060802	251.613	52.1677	35.9373
gene-BW25113_1996	insD1	CP009273.1	-	2062433	2063338	38.8918	8.06354	5.55481
gene-BW25113_1997	insC1	CP009273.1	-	2063296	2063661	38.553	7.99329	5.50643
gene-BW25113_1999	yeeP	CP009273.1	+	2064141	2064692	9.32065	1.93248	1.33125
gene-BW25113_2000	flu	CP009273.1	+	2065020	2068139	181.346	37.599	25.9012
gene-BW25113_2001	yeeR	CP009273.1	+	2068260	2069792	47.2169	9.78961	6.74387
gene-BW25113_2002	yeeS	CP009273.1	+	2069789	2070235	30.5984	6.34406	4.3703
gene-BW25113_2003	yeeT	CP009273.1	+	2070298	2070519	11.1306	2.30774	1.58976
gene-BW25113_2004	cbeA	CP009273.1	+	2070593	2070961	8.0813	1.67552	1.15423
gene-BW25113_2005	cbtA	CP009273.1	+	2071050	2071424	9.424	1.9539	1.34601
gene-BW25113_2006	yeeW	CP009273.1	+	2071421	2071588	20.9881	4.35152	2.99768
gene-BW25113_2007	yeeX	CP009273.1	-	2072513	2072842	1542.65	319.843	220.333
gene-BW25113_2008	yeeA	CP009273.1	-	2073014	2074072	51.17	10.6092	7.30848
gene-BW25113_2009	sbmC	CP009273.1	-	2074270	2074743	92.5401	19.1866	13.2173
gene-BW25113_2010	dacD	CP009273.1	-	2074862	2076028	36.886	7.64768	5.26834
gene-BW25113_2011	sbcB	CP009273.1	+	2076237	2077664	180.811	37.488	25.8248
gene-BW25113_2012	yeeD	CP009273.1	-	2077707	2077934	357.789	74.1815	51.1022
gene-BW25113_2013	yeeE	CP009273.1	-	2077948	2079006	77.8414	16.1391	11.1179
gene-BW25113_2014	plaP	CP009273.1	-	2079185	2080543	1999.47	414.556	285.58
gene-BW25113_2015	yeeY	CP009273.1	-	2080810	2081739	35.9828	7.46041	5.13933
gene-BW25113_2016	yeeZ	CP009273.1	-	2081785	2082609	401.698	83.2852	57.3735
gene-BW25113_2017	yefM	CP009273.1	-	2082943	2083194	378.459	78.4668	54.0543
gene-BW25113_2018	hisL	CP009273.1	+	2083477	2083527	16.3333	3.38643	2.33285
gene-BW25113_2019	hisG	CP009273.1	+	2083673	2084572	135.007	27.9913	19.2827
gene-BW25113_2020	hisD	CP009273.1	+	2084578	2085882	111.187	23.0526	15.8805
gene-BW25113_2021	hisC	CP009273.1	+	2085879	2086949	1.56253	0.323964	0.223173
gene-BW25113_2022	hisB	CP009273.1	+	2086949	2088016	175.642	36.4164	25.0866
gene-BW25113_2023	hisH	CP009273.1	+	2088016	2088606	58.4466	12.1179	8.34778
gene-BW25113_2024	hisA	CP009273.1	+	2088606	2089343	126.458	26.2189	18.0617
gene-BW25113_2025	hisF	CP009273.1	+	2089325	2090101	173.44	35.9598	24.772
gene-BW25113_2026	hisI	CP009273.1	+	2090095	2090706	181.069	37.5414	25.8616
gene-BW25113_2027	wzzB	CP009273.1	-	2090802	2091782	1716.55	355.898	245.171
gene-BW25113_2028	ugd	CP009273.1	-	2091928	2093094	71.491	14.8224	10.2109
gene-BW25113_2029	gnd	CP009273.1	-	2093343	2094749	3565.6	739.266	509.266
gene-BW25113_2030	insH1	CP009273.1	-	2095376	2096392	462.215	95.8324	66.0171
gene-BW25113_2032	wbbK	CP009273.1	-	2096872	2097990	501.348	103.946	71.6063
gene-BW25113_2033	wbbJ	CP009273.1	-	2097975	2098565	1301.81	269.907	185.934
gene-BW25113_2034	wbbI	CP009273.1	-	2098546	2099538	1050.07	217.715	149.98
gene-BW25113_2035	wbbH	CP009273.1	-	2099541	2100707	1.45701	0.302086	0.208101
gene-BW25113_2036	glf	CP009273.1	-	2100707	2101810	1280.59	265.508	182.903
gene-BW25113_2037	wzxB	CP009273.1	-	2101818	2103065	640.437	132.784	91.4721
gene-BW25113_2038	rfbC	CP009273.1	-	2103062	2103619	46.7495	9.6927	6.67711
gene-BW25113_2039	rfbA	CP009273.1	-	2103619	2104500	1791.1	371.353	255.818
gene-BW25113_2040	rfbD	CP009273.1	-	2104558	2105457	2.85804	0.592565	0.408206
gene-BW25113_2041	rfbB	CP009273.1	-	2105457	2106542	1635.17	339.023	233.547
gene-BW25113_2042	wcaN	CP009273.1	-	2106915	2107808	1411.33	292.614	201.576
gene-BW25113_2043	wcaM	CP009273.1	-	2107983	2109377	17.3943	3.6064	2.48438
gene-BW25113_2044	wcaL	CP009273.1	-	2109388	2110608	14.2424	2.95292	2.03421
gene-BW25113_2045	wcaK	CP009273.1	-	2110605	2111885	6.16315	1.27782	0.880268
gene-BW25113_2046	wzxC	CP009273.1	-	2112161	2113639	6.35227	1.31703	0.907278
gene-BW25113_2047	wcaJ	CP009273.1	-	2113641	2115035	3.55197	0.73644	0.507319
gene-BW25113_2048	cpsG	CP009273.1	-	2115090	2116460	5.345	1.10819	0.763414
gene-BW25113_2049	cpsB	CP009273.1	-	2116565	2118001	3.09882	0.642486	0.442596
gene-BW25113_2050	wcaI	CP009273.1	-	2118004	2119227	3.74346	0.776143	0.53467
gene-BW25113_2051	wcaH	CP009273.1	-	2119224	2119703	4.0375	0.837106	0.576666
gene-BW25113_2052	wcaG	CP009273.1	-	2119706	2120671	6.27536	1.30109	0.896294
gene-BW25113_2053	gmd	CP009273.1	-	2120674	2121795	10.7977	2.23871	1.54221
gene-BW25113_2054	wcaF	CP009273.1	-	2121821	2122369	2.39526	0.496617	0.34211
gene-BW25113_2055	wcaE	CP009273.1	-	2122385	2123131	3.41901	0.708872	0.488328
gene-BW25113_2056	wcaD	CP009273.1	-	2123142	2124359	1.40094	0.290461	0.200093
gene-BW25113_2057	wcaC	CP009273.1	-	2124334	2125551	3.23453	0.670623	0.461979
gene-BW25113_2058	wcaB	CP009273.1	-	2125548	2126036	6.76687	1.40299	0.966495
gene-BW25113_2059	wcaA	CP009273.1	-	2126039	2126878	4.16548	0.863639	0.594944
gene-BW25113_2060	wzc	CP009273.1	-	2126971	2129133	2.8123	0.583081	0.401673
gene-BW25113_2061	wzb	CP009273.1	-	2129136	2129579	3.28378	0.680836	0.469015
gene-BW25113_2062	wza	CP009273.1	-	2129585	2130724	4.23509	0.878072	0.604887
gene-BW25113_2063	yegH	CP009273.1	+	2131383	2132966	141.487	29.335	20.2083
gene-BW25113_2064	asmA	CP009273.1	-	2133240	2135093	197.426	40.9328	28.1978
gene-BW25113_2065	dcd	CP009273.1	-	2135115	2135696	661.452	137.141	94.4735
gene-BW25113_2066	udk	CP009273.1	-	2135788	2136429	463.559	96.111	66.209
gene-BW25113_2067	yegE	CP009273.1	+	2136747	2140064	20.1043	4.16828	2.87144
gene-BW25113_2068	alkA	CP009273.1	-	2140173	2141021	29.3227	6.07956	4.18809
gene-BW25113_2069	yegD	CP009273.1	+	2141155	2142507	115.156	23.8756	16.4474
gene-BW25113_2070	yegI	CP009273.1	-	2142520	2144466	13.3128	2.76018	1.90143
gene-BW25113_2071	yegJ	CP009273.1	+	2144666	2145127	7.08658	1.46928	1.01216
gene-BW25113_2072	yegK	CP009273.1	-	2145192	2145953	5.92353	1.22814	0.846043
gene-BW25113_2073	yegL	CP009273.1	-	2145950	2146609	9.73526	2.01844	1.39046
gene-BW25113_2074	mdtA	CP009273.1	+	2147497	2148744	0.408521	0.0847	0.058348
gene-BW25113_2075	mdtB	CP009273.1	+	2148744	2151866	34.4721	7.14719	4.92356
gene-BW25113_2076	mdtC	CP009273.1	+	2151867	2154944	26.36	5.46528	3.76493
[truncated: 2,501 more rows]

## Sheet: BW25113_wt Triplicate 2
# Description of Variables from the StringTie Manual
# Gene ID: The gene identifier comes from the reference annotation provided with the -G option.
# Gene Name: This field contains the gene name in the reference annotation provided with the -G option.
# Reference: Name of the reference sequence that was used in the alignment of the reads.
# Strand: '+' denotes that the gene is on the forward strand, '-' for the reverse strand.
# Start: Start position of the gene (1-based index).
# End: End position of the gene (1-based index).
# Coverage: Per-base coverage of the gene.
# FPKM: normalized expression level in FPKM units (see manual for additional details).
# TPM: normalized expression level in RPM units (see manual for additional details).
Gene ID	Gene Name	Reference	Strand	Start	End	Coverage	FPKM	TPM
gene-BW25113_0001	thrL	CP009273.1	+	190	255	322.197	69.897	48.9397
gene-BW25113_0002	thrA	CP009273.1	+	337	2799	355.38	77.0956	53.98
gene-BW25113_0003	thrB	CP009273.1	+	2801	3733	405.946	88.0655	61.6608
gene-BW25113_0004	thrC	CP009273.1	+	3734	5020	374.417	81.2256	56.8717
gene-BW25113_0005	yaaX	CP009273.1	+	5234	5530	129.909	28.1823	19.7324
gene-BW25113_0006	yaaA	CP009273.1	-	5683	6459	318.461	69.0864	48.3722
gene-BW25113_0007	yaaJ	CP009273.1	-	6529	7959	156.396	33.9284	23.7556
gene-BW25113_0008	talB	CP009273.1	+	8238	9191	6176.22	1339.86	938.13
gene-BW25113_0009	mog	CP009273.1	+	9306	9893	546.681	118.596	83.0375
gene-BW25113_0010	satP	CP009273.1	-	9928	10494	137.553	29.8405	20.8934
gene-BW25113_0011	yaaW	CP009273.1	-	10643	11356	10.402	2.25659	1.57999
gene-BW25113_0013	yaaI	CP009273.1	-	11382	11786	10.8173	2.34669	1.64308
gene-BW25113_0014	dnaK	CP009273.1	+	12163	14079	9012.03	1955.06	1368.87
gene-BW25113_0015	dnaJ	CP009273.1	+	14168	15298	2354.43	510.767	357.623
gene-BW25113_0016	insL1	CP009273.1	+	15445	16557	503.081	109.138	76.415
gene-BW25113_0018	mokC	CP009273.1	-	16751	16960	60.5537	13.1364	9.19774
gene-BW25113_0019	nhaA	CP009273.1	+	17489	18655	207.162	44.9414	31.4666
gene-BW25113_0020	nhaR	CP009273.1	+	18715	19620	118.394	25.6842	17.9833
gene-BW25113_0021	insB1	CP009273.1	-	19811	20314	47.92	10.3957	7.27875
gene-BW25113_0022	insA	CP009273.1	-	20233	20508	60.7557	13.1803	9.22842
gene-BW25113_0023	rpsT	CP009273.1	-	20815	21078	15756.6	3418.22	2393.33
gene-BW25113_0024	yaaY	CP009273.1	+	21181	21399	158.11	34.3001	24.0159
gene-BW25113_0025	ribF	CP009273.1	+	21407	22348	1142.76	247.91	173.579
gene-BW25113_0026	ileS	CP009273.1	+	22391	25207	1836.73	398.457	278.988
gene-BW25113_0027	lspA	CP009273.1	+	25207	25701	1270.89	275.705	193.04
gene-BW25113_0028	fkpB	CP009273.1	+	25826	26275	703.009	152.51	106.783
gene-BW25113_0029	ispH	CP009273.1	+	26277	27227	675.305	146.5	102.575
gene-BW25113_0030	rihC	CP009273.1	+	27293	28207	227.913	49.443	34.6185
gene-BW25113_0031	dapB	CP009273.1	+	28374	29195	490.788	106.471	74.5477
gene-BW25113_0032	carA	CP009273.1	+	29651	30799	80.5762	17.4801	12.239
gene-BW25113_0033	carB	CP009273.1	+	30817	34038	90.995	19.7403	13.8216
gene-BW25113_0034	caiF	CP009273.1	+	34300	34695	43.8662	9.51627	6.663
gene-BW25113_0035	caiE	CP009273.1	-	34781	35371	13.7242	2.97731	2.08462
gene-BW25113_0036	caiD	CP009273.1	-	35377	36162	7.3257	1.58923	1.11273
gene-BW25113_0037	caiC	CP009273.1	-	36271	37824	20.8436	4.52179	3.16602
gene-BW25113_0038	caiB	CP009273.1	-	37898	39115	20.8612	4.52561	3.1687
gene-BW25113_0039	caiA	CP009273.1	-	39244	40386	42.8163	9.2885	6.50353
gene-BW25113_0040	caiT	CP009273.1	-	40417	41931	4.27694	0.927833	0.649641
gene-BW25113_0041	fixA	CP009273.1	+	42403	43173	7.0856	1.53714	1.07626
gene-BW25113_0042	fixB	CP009273.1	+	43188	44129	4.49894	0.975994	0.683361
gene-BW25113_0043	fixC	CP009273.1	+	44180	45466	5.51049	1.19544	0.83701
gene-BW25113_0044	fixX	CP009273.1	+	45463	45750	2.60764	0.565698	0.396084
gene-BW25113_0045	yaaU	CP009273.1	+	45807	47138	3.03604	0.658633	0.461155
gene-BW25113_0046	kefF	CP009273.1	+	47246	47776	27.9115	6.05508	4.23958
gene-BW25113_0047	kefC	CP009273.1	+	47769	49631	33.7391	7.31932	5.12477
gene-BW25113_0048	folA	CP009273.1	+	49823	50302	560.67	121.631	85.1623
gene-BW25113_0049	apaH	CP009273.1	-	50380	51222	265.367	57.5683	40.3076
gene-BW25113_0050	apaG	CP009273.1	-	51229	51606	847.251	183.802	128.692
gene-BW25113_0051	rsmA	CP009273.1	-	51609	52430	1123.05	243.633	170.585
gene-BW25113_0052	pdxA	CP009273.1	-	52427	53416	5.58204	1.21096	0.847878
gene-BW25113_0053	surA	CP009273.1	-	53416	54702	1530.36	331.995	232.453
gene-BW25113_0054	lptD	CP009273.1	-	54755	57109	1045.5	226.809	158.805
gene-BW25113_0055	djlA	CP009273.1	+	57364	58179	187.453	40.6659	28.473
gene-BW25113_0058	rluA	CP009273.1	-	59687	60346	628.435	136.332	95.4554
gene-BW25113_0059	rapA	CP009273.1	-	60358	63264	484.441	105.094	73.5836
gene-BW25113_0060	polB	CP009273.1	-	63429	65780	89.0846	19.3259	13.5314
gene-BW25113_0061	araD	CP009273.1	-	65855	66532	2.9764	0.645696	0.452097
gene-BW25113_0064	araC	CP009273.1	+	66874	67752	164.742	35.7388	25.0233
gene-BW25113_0065	yabI	CP009273.1	+	67838	68602	99.047	21.4871	15.0446
gene-BW25113_0066	thiQ	CP009273.1	-	68716	69414	83.8597	18.1924	12.7378
gene-BW25113_0067	thiP	CP009273.1	-	69398	71008	34.716	7.53125	5.27316
gene-BW25113_0068	thiB	CP009273.1	-	70984	71967	81.3643	17.6511	12.3587
gene-BW25113_0069	sgrR	CP009273.1	-	72131	73786	105.239	22.8303	15.9851
gene-BW25113_0070	setA	CP009273.1	+	74108	75286	74.7388	16.2137	11.3524
gene-BW25113_0071	leuD	CP009273.1	-	75335	75940	57.4439	12.4618	8.72537
gene-BW25113_0072	leuC	CP009273.1	-	75951	77351	41.571	9.01836	6.31438
gene-BW25113_0073	leuB	CP009273.1	-	77354	78445	0.519852	0.112776	0.078962
gene-BW25113_0074	leuA	CP009273.1	-	78445	80016	33.9155	7.35758	5.15156
gene-BW25113_0075	leuL	CP009273.1	-	80109	80195	11.5517	2.50602	1.75464
gene-BW25113_0076	leuO	CP009273.1	+	80855	81799	15.3079	3.32088	2.32518
gene-BW25113_0077	ilvI	CP009273.1	+	82117	83841	57.0968	12.3865	8.67266
gene-BW25113_0078	ilvH	CP009273.1	+	83844	84335	40.3374	8.75074	6.127
gene-BW25113_0080	cra	CP009273.1	+	84515	85519	696.955	151.196	105.863
gene-BW25113_0081	mraZ	CP009273.1	+	86121	86579	1192.86	258.777	181.188
gene-BW25113_0082	rsmH	CP009273.1	+	86581	87522	756.783	164.175	114.951
gene-BW25113_0083	ftsL	CP009273.1	+	87519	87884	606.133	131.494	92.0679
gene-BW25113_0084	ftsI	CP009273.1	+	87900	89666	300.824	65.2604	45.6934
gene-BW25113_0085	murE	CP009273.1	+	89653	91140	630.624	136.807	95.788
gene-BW25113_0086	murF	CP009273.1	+	91137	92495	666.196	144.524	101.191
gene-BW25113_0087	mraY	CP009273.1	+	92489	93571	622.927	135.137	94.6188
gene-BW25113_0088	murD	CP009273.1	+	93574	94890	665.805	144.439	101.132
gene-BW25113_0089	ftsW	CP009273.1	+	94890	96134	487.299	105.714	74.0177
gene-BW25113_0090	murG	CP009273.1	+	96131	97198	507.129	110.016	77.0298
gene-BW25113_0091	murC	CP009273.1	+	97252	98727	685.175	148.641	104.074
gene-BW25113_0092	ddlB	CP009273.1	+	98720	99640	1077.37	233.723	163.645
gene-BW25113_0093	ftsQ	CP009273.1	+	99642	100472	811.589	176.065	123.275
gene-BW25113_0094	ftsA	CP009273.1	+	100469	101731	912.505	197.958	138.604
gene-BW25113_0095	ftsZ	CP009273.1	+	101792	102943	1759.77	381.761	267.298
gene-BW25113_0096	lpxC	CP009273.1	+	103044	103961	4576.74	992.871	695.178
gene-BW25113_0097	secM	CP009273.1	+	104192	104704	796.598	172.813	120.998
gene-BW25113_0098	secA	CP009273.1	+	104766	107471	1170.92	254.018	177.856
gene-BW25113_0099	mutT	CP009273.1	+	107531	107920	211.738	45.9342	32.1618
gene-BW25113_0101	yacG	CP009273.1	-	108136	108333	399.662	86.702	60.7062
gene-BW25113_0102	zapD	CP009273.1	-	108343	109086	218.106	47.3157	33.129
gene-BW25113_0103	coaE	CP009273.1	-	109086	109706	149.159	32.3583	22.6563
gene-BW25113_0104	guaC	CP009273.1	+	109931	110974	543.051	117.809	82.4861
gene-BW25113_0106	hofC	CP009273.1	-	111009	112211	18.5927	4.03347	2.82411
gene-BW25113_0107	hofB	CP009273.1	-	112201	113586	24.5996	5.3366	3.73652
gene-BW25113_0108	ppdD	CP009273.1	-	113596	114036	6	1.30163	0.911363
gene-BW25113_0109	nadC	CP009273.1	-	114239	115132	315.186	68.3759	47.8748
gene-BW25113_0110	ampD	CP009273.1	+	115220	115771	228.24	49.5141	34.6683
gene-BW25113_0111	ampE	CP009273.1	+	115768	116622	151.201	32.8012	22.9664
gene-BW25113_0112	aroP	CP009273.1	-	116665	118038	103.721	22.5011	15.7546
gene-BW25113_0113	pdhR	CP009273.1	+	118579	119343	1421.52	308.384	215.921
gene-BW25113_0114	aceE	CP009273.1	+	119504	122167	16901.2	3666.52	2567.19
gene-BW25113_0115	aceF	CP009273.1	+	122182	124074	16324.2	3541.34	2479.54
gene-BW25113_0116	lpd	CP009273.1	+	124399	125823	12242.8	2655.94	1859.61
gene-BW25113_0117	yacH	CP009273.1	-	125894	127747	26.4536	5.73881	4.01814
gene-BW25113_0118	acnB	CP009273.1	+	128102	130699	2159.89	468.563	328.074
gene-BW25113_0119	yacL	CP009273.1	+	130875	131237	731.598	158.712	111.125
gene-BW25113_0120	speD	CP009273.1	-	131275	132069	2255.16	489.231	342.545
gene-BW25113_0121	speE	CP009273.1	-	132085	132951	1918.67	416.234	291.435
gene-BW25113_0122	yacC	CP009273.1	-	133057	133404	528.98	114.756	80.3488
gene-BW25113_0123	cueO	CP009273.1	+	133570	135120	72.5938	15.7484	11.0266
gene-BW25113_0124	gcd	CP009273.1	-	135322	137712	302.886	65.7076	46.0065
gene-BW25113_0125	hpt	CP009273.1	+	137918	138454	1870.49	405.781	284.115
gene-BW25113_0126	can	CP009273.1	-	138495	139157	1808.83	392.405	274.75
gene-BW25113_0127	yadG	CP009273.1	+	139266	140192	414.752	89.9756	62.9982
gene-BW25113_0128	yadH	CP009273.1	+	140189	140959	345.426	74.9362	52.4681
gene-BW25113_0129	yadI	CP009273.1	+	141064	141504	314.814	68.2953	47.8183
gene-BW25113_0130	yadE	CP009273.1	+	141568	142797	75.2285	16.32	11.4267
gene-BW25113_0131	panD	CP009273.1	-	142801	143181	1507.12	326.953	228.923
gene-BW25113_0132	yadD	CP009273.1	+	143455	144357	72.4784	15.7234	11.009
gene-BW25113_0133	panC	CP009273.1	-	144431	145282	1037.71	225.12	157.623
gene-BW25113_0134	panB	CP009273.1	-	145294	146088	884.824	191.952	134.399
gene-BW25113_0135	yadC	CP009273.1	-	146202	147440	13.9007	3.0156	2.11144
gene-BW25113_0136	yadK	CP009273.1	-	147490	148086	6.42546	1.39393	0.975988
gene-BW25113_0137	yadL	CP009273.1	-	148113	148718	7.57426	1.64315	1.15048
gene-BW25113_0138	yadM	CP009273.1	-	148730	149299	6.62105	1.43636	1.0057
gene-BW25113_0139	htrE	CP009273.1	-	149316	151913	5.50423	1.19408	0.836059
gene-BW25113_0140	yadV	CP009273.1	-	151948	152688	8.86235	1.92259	1.34614
gene-BW25113_0141	yadN	CP009273.1	-	152786	153370	7.93333	1.72105	1.20503
gene-BW25113_0142	folK	CP009273.1	-	153740	154219	205.42	44.5634	31.202
gene-BW25113_0143	pcnB	CP009273.1	-	154216	155613	631.598	137.018	95.9358
gene-BW25113_0144	gluQ	CP009273.1	-	155673	156599	96.7465	20.9881	14.6952
gene-BW25113_0145	dksA	CP009273.1	-	156636	157091	8490.34	1841.88	1289.63
gene-BW25113_0146	sfsA	CP009273.1	-	157269	157973	483.616	104.915	73.4583
gene-BW25113_0147	ligT	CP009273.1	-	157988	158518	117.26	25.4382	17.8111
gene-BW25113_0148	hrpB	CP009273.1	+	158592	161021	117.084	25.4	17.7843
gene-BW25113_0149	mrcB	CP009273.1	+	161217	163751	258.178	56.0087	39.2156
gene-BW25113_0150	fhuA	CP009273.1	+	163971	166214	2072.83	449.678	314.851
gene-BW25113_0151	fhuC	CP009273.1	+	166265	167062	436.16	94.62	66.25
gene-BW25113_0152	fhuD	CP009273.1	+	167062	167952	271.355	58.8673	41.2171
gene-BW25113_0153	fhuB	CP009273.1	+	167949	169931	174.434	37.8415	26.4955
gene-BW25113_0154	hemL	CP009273.1	-	170089	171369	772.777	167.645	117.38
gene-BW25113_0155	clcA	CP009273.1	+	171594	173015	160.136	34.7396	24.3236
gene-BW25113_0156	erpA	CP009273.1	+	173097	173441	982.142	213.065	149.181
gene-BW25113_0157	yadS	CP009273.1	-	173488	174111	148.482	32.2116	22.5536
gene-BW25113_0158	btuF	CP009273.1	-	174149	174949	212.283	46.0523	32.2444
gene-BW25113_0159	mtn	CP009273.1	-	174942	175640	1191.61	258.507	180.999
gene-BW25113_0160	dgt	CP009273.1	+	175724	177241	140.958	30.5792	21.4106
gene-BW25113_0161	degP	CP009273.1	+	177371	178795	233.566	50.6694	35.4772
gene-BW25113_0162	cdaR	CP009273.1	+	178950	180107	122.641	26.6055	18.6284
gene-BW25113_0163	yaeH	CP009273.1	-	180196	180582	624.22	135.417	94.8151
gene-BW25113_0164	yaeI	CP009273.1	-	180744	181556	59.2977	12.864	9.00695
gene-BW25113_0166	dapD	CP009273.1	-	181610	182434	2195.05	476.191	333.415
gene-BW25113_0167	glnD	CP009273.1	-	182465	185137	120.386	26.1163	18.2859
gene-BW25113_0168	map	CP009273.1	-	185199	185993	2377.14	515.694	361.074
gene-BW25113_0169	rpsB	CP009273.1	+	186361	187086	42608.3	9243.38	6471.94
gene-BW25113_0170	tsf	CP009273.1	+	187344	188195	14141.7	3067.89	2148.05
gene-BW25113_0171	pyrH	CP009273.1	+	188342	189067	1663.55	360.887	252.682
gene-BW25113_0172	frr	CP009273.1	+	189359	189916	5786.27	1255.26	878.898
gene-BW25113_0173	dxr	CP009273.1	+	190008	191204	301.005	65.2996	45.7208
gene-BW25113_0174	ispU	CP009273.1	+	191390	192151	1134.13	246.036	172.267
gene-BW25113_0175	cdsA	CP009273.1	+	192164	193021	897.497	194.702	136.324
gene-BW25113_0176	rseP	CP009273.1	+	193033	194385	1278.49	277.354	194.195
gene-BW25113_0177	bamA	CP009273.1	+	194415	196847	2349.54	509.706	356.88
gene-BW25113_0178	skp	CP009273.1	+	196969	197454	5009	1086.65	760.837
gene-BW25113_0179	lpxD	CP009273.1	+	197458	198483	3408.83	739.507	517.781
gene-BW25113_0180	fabZ	CP009273.1	+	198588	199043	4626	1003.56	702.661
gene-BW25113_0181	lpxA	CP009273.1	+	199047	199835	4395.47	953.547	667.645
gene-BW25113_0182	lpxB	CP009273.1	+	199835	200983	534.221	115.893	81.145
gene-BW25113_0183	rnhB	CP009273.1	+	200980	201576	376.699	81.7207	57.2183
gene-BW25113_0184	dnaE	CP009273.1	+	201613	205095	628.664	136.382	95.4903
gene-BW25113_0185	accA	CP009273.1	+	205108	206067	2206.18	478.606	335.106
gene-BW25113_0186	ldcC	CP009273.1	+	206166	208307	52.9118	11.4786	8.03697
gene-BW25113_0187	yaeR	CP009273.1	+	208364	208753	159.126	34.5205	24.1702
gene-BW25113_0188	tilS	CP009273.1	+	208818	210116	122.662	26.6101	18.6316
gene-BW25113_0189	rof	CP009273.1	-	210165	210419	550.063	119.33	83.5512
gene-BW25113_0190	yaeQ	CP009273.1	+	210778	211323	325.352	70.5814	49.419
gene-BW25113_0191	arfB	CP009273.1	+	211320	211742	258.037	55.9782	39.1943
gene-BW25113_0192	nlpE	CP009273.1	+	211756	212466	229.973	49.8901	34.9315
gene-BW25113_0193	yaeF	CP009273.1	-	212666	213490	36.9661	8.01937	5.61492
gene-BW25113_0194	proS	CP009273.1	-	213544	215262	1768.44	383.644	268.616
gene-BW25113_0195	tsaA	CP009273.1	-	215374	216081	193.793	42.0412	29.436
gene-BW25113_0196	rcsF	CP009273.1	-	216078	216482	424.821	92.16	64.5277
gene-BW25113_0197	metQ	CP009273.1	-	216600	217415	689.818	149.648	104.779
gene-BW25113_0198	metI	CP009273.1	-	217455	218108	287.423	62.3533	43.6579
gene-BW25113_0199	metN	CP009273.1	-	218101	219132	195.281	42.364	29.662
gene-BW25113_0200	gmhB	CP009273.1	+	219320	219895	432.845	93.9009	65.7466
gene-BW25113_0201	rrsH	CP009273.1	+	220258	221799	1288.11	279.441	195.656
gene-BW25113_0202	ileV	CP009273.1	+	221868	221944	335.191	72.7158	50.9134
gene-BW25113_0203	alaV	CP009273.1	+	221987	222062	237.156	51.4482	36.0225
gene-BW25113_0204	rrlH	CP009273.1	+	222246	225149	6420.51	1392.86	975.237
gene-BW25113_0205	rrfH	CP009273.1	+	225243	225362	4.64306	1.00726	0.705252
gene-BW25113_0206	aspU	CP009273.1	+	225415	225491	5.53896	1.20161	0.841334
gene-BW25113_0207	dkgB	CP009273.1	+	225654	226457	73.1082	15.86	11.1047
gene-BW25113_0208	yafC	CP009273.1	-	226454	227368	146.078	31.6899	22.1883
gene-BW25113_0209	yafD	CP009273.1	+	227609	228409	330.881	71.781	50.2589
gene-BW25113_0210	yafE	CP009273.1	+	228413	229036	70.4183	15.2764	10.6961
gene-BW25113_0211	mltD	CP009273.1	-	229084	230442	360.537	78.2144	54.7634
gene-BW25113_0212	gloB	CP009273.1	-	230514	231269	93.8095	20.3509	14.2491
gene-BW25113_0213	yafS	CP009273.1	+	231303	232025	214.148	46.457	32.5278
gene-BW25113_0214	rnhA	CP009273.1	-	232022	232489	332.846	72.2072	50.5573
gene-BW25113_0215	dnaQ	CP009273.1	+	232554	233285	220.903	47.9224	33.5538
gene-BW25113_0216	aspV	CP009273.1	+	233418	233494	78.6623	17.0649	11.9483
gene-BW25113_0217	yafT	CP009273.1	+	233822	234607	22.2786	4.83309	3.38399
gene-BW25113_0218	yafU	CP009273.1	-	235233	235589	9.23529	2.00349	1.40278
gene-BW25113_0219	yafV	CP009273.1	-	235906	236676	184.956	40.1241	28.0937
gene-BW25113_0220	ivy	CP009273.1	+	236830	237303	205.688	44.6216	31.2427
gene-BW25113_0221	fadE	CP009273.1	-	237346	239790	20.0176	4.34259	3.04055
gene-BW25113_0222	gmhA	CP009273.1	+	240030	240608	1276.93	277.016	193.958
gene-BW25113_0223	yafJ	CP009273.1	+	240814	241581	356.014	77.2333	54.0764
gene-BW25113_0224	yafK	CP009273.1	-	241552	242292	330.609	71.7218	50.2174
gene-BW25113_0225	yafQ	CP009273.1	-	242448	242726	162.566	35.2669	24.6928
gene-BW25113_0226	dinJ	CP009273.1	-	242729	242989	374.088	81.1542	56.8217
gene-BW25113_0227	yafL	CP009273.1	+	243199	243948	10.9347	2.37215	1.66091
gene-BW25113_0228	rayT	CP009273.1	+	244124	244621	80.1827	17.3947	12.1793
gene-BW25113_0229	lfhA	CP009273.1	-	244845	246557	7.89142	1.71195	1.19866
gene-BW25113_0230	lafU	CP009273.1	+	246559	247314	10.0569	2.18173	1.52758
gene-BW25113_0231	dinB	CP009273.1	+	247385	248440	49.5104	10.7407	7.52033
gene-BW25113_0232	yafN	CP009273.1	+	248492	248785	100.507	21.8038	15.2664
gene-BW25113_0233	yafO	CP009273.1	+	248788	249186	64.7644	14.0499	9.83732
gene-BW25113_0234	yafP	CP009273.1	+	249196	249648	25.9007	5.61885	3.93415
gene-BW25113_0235	ykfJ	CP009273.1	+	249966	250172	1.72464	0.374141	0.261962
gene-BW25113_0236	prfH	CP009273.1	+	250189	250689	34.7162	7.53129	5.27319
gene-BW25113_0237	pepD	CP009273.1	-	250746	252203	1922.59	417.084	292.03
gene-BW25113_0238	gpt	CP009273.1	+	252464	252922	521.373	113.106	79.1933
gene-BW25113_0239	frsA	CP009273.1	+	253014	254258	209.948	45.5458	31.8898
gene-BW25113_0240	crl	CP009273.1	+	254316	254717	1671.29	362.566	253.858
gene-BW25113_0241	phoE	CP009273.1	-	254756	255811	23.41	5.07854	3.55584
gene-BW25113_0242	proB	CP009273.1	+	256099	257202	649.131	140.822	98.5991
gene-BW25113_0243	proA	CP009273.1	+	257214	258467	662.303	143.679	100.6
gene-BW25113_0244	thrW	CP009273.1	+	258582	258657	194.066	42.1004	29.4774
gene-BW25113_0245	ykfI	CP009273.1	-	259039	259380	64.4357	13.9786	9.78738
gene-BW25113_0246	yafW	CP009273.1	-	259401	259718	56.2704	12.2072	8.54714
gene-BW25113_0247	ykfG	CP009273.1	-	259967	260443	35.3019	7.65834	5.36214
gene-BW25113_0248	yafX	CP009273.1	-	260459	260917	81.3965	17.658	12.3636
gene-BW25113_0249	ykfF	CP009273.1	-	261015	261254	96.5042	20.9355	14.6584
gene-BW25113_0250	ykfB	CP009273.1	-	261331	261798	125.573	27.2416	19.0737
gene-BW25113_0251	yafY	CP009273.1	-	261821	262264	40.1715	8.71476	6.10181
gene-BW25113_0252	yafZ	CP009273.1	-	262895	263716	18.4197	3.99595	2.79784
gene-BW25113_0253	ykfA	CP009273.1	-	263808	264671	37.919	8.22609	5.75966
gene-BW25113_0254	perR	CP009273.1	-	265000	265893	32.1163	6.96727	4.87827
gene-BW25113_0256	insI1	CP009273.1	+	266314	267465	127.241	27.6035	19.3271
gene-BW25113_0258	ykfC	CP009273.1	+	268558	269665	41.7428	9.05562	6.34047
gene-BW25113_0259	insH1	CP009273.1	-	269812	270828	509.599	110.552	77.405
gene-BW25113_0260	mmuP	CP009273.1	+	271036	272439	12.9672	2.81309	1.96964
gene-BW25113_0261	mmuM	CP009273.1	+	272426	273358	140.325	30.4419	21.3145
gene-BW25113_0262	afuC	CP009273.1	-	273467	274513	9.00573	1.95369	1.36791
gene-BW25113_0263	afuB	CP009273.1	-	274525	274872	6.90805	1.49862	1.04929
gene-BW25113_0264	insB1	CP009273.1	-	274889	275392	45.1476	9.79425	6.85764
gene-BW25113_0265	insA	CP009273.1	-	275311	275586	55.5303	12.0467	8.43472
gene-BW25113_0266	yagB	CP009273.1	-	276138	276446	68.8641	14.9393	10.46
gene-BW25113_0267	yagA	CP009273.1	-	276540	277694	2.61905	0.568173	0.397817
gene-BW25113_0268	yagE	CP009273.1	+	277989	278897	433.513	94.0456	65.8479
gene-BW25113_0269	yagF	CP009273.1	+	278912	280879	243.469	52.8178	36.9815
gene-BW25113_0270	yagG	CP009273.1	+	281106	282488	15.8323	3.43463	2.40482
gene-BW25113_0271	yagH	CP009273.1	+	282500	284110	21.9416	4.75999	3.3328
gene-BW25113_0272	yagI	CP009273.1	-	284115	284873	97.7576	21.2074	14.8488
gene-BW25113_0273	argF	CP009273.1	-	285012	286016	38.9065	8.44032	5.90965
gene-BW25113_0274	insB1	CP009273.1	-	286360	286863	69.0622	14.9823	10.4901
gene-BW25113_0275	insA	CP009273.1	-	286782	287057	41.6533	9.03621	6.32688
gene-BW25113_0276	yagJ	CP009273.1	+	287115	287942	56.7186	12.3045	8.61521
gene-BW25113_0277	yagK	CP009273.1	-	288033	288659	35.1196	7.6188	5.33446
gene-BW25113_0278	yagL	CP009273.1	-	288931	289629	15.568	3.37729	2.36468
gene-BW25113_0279	yagM	CP009273.1	-	289656	290510	8.29824	1.80021	1.26045
gene-BW25113_0280	yagN	CP009273.1	-	290850	291290	394.388	85.5579	59.9051
gene-BW25113_0281	intF	CP009273.1	-	291407	292807	116.475	25.268	17.6919
gene-BW25113_0283	paoD	CP009273.1	-	293481	294437	9.27821	2.0128	1.4093
gene-BW25113_0284	paoC	CP009273.1	-	294447	296645	7.44706	1.61555	1.13116
gene-BW25113_0285	paoB	CP009273.1	-	296642	297598	5.87453	1.27441	0.892305
gene-BW25113_0286	paoA	CP009273.1	-	297595	298284	6.56232	1.42362	0.996776
gene-BW25113_0287	yagU	CP009273.1	+	298702	299316	489.354	106.16	74.3299
gene-BW25113_0288	ykgJ	CP009273.1	-	299564	299893	27.7333	6.01643	4.21252
gene-BW25113_0289	ecpE	CP009273.1	-	300206	300916	22.8813	4.96384	3.47553
gene-BW25113_0290	ecpD	CP009273.1	-	300885	302528	24.2959	5.27072	3.6904
gene-BW25113_0291	ecpC	CP009273.1	-	302518	305043	10.8555	2.35497	1.64888
gene-BW25113_0292	ecpB	CP009273.1	-	305069	305737	4.49477	0.975089	0.682728
gene-BW25113_0293	ecpA	CP009273.1	-	305795	306382	36.4388	7.90498	5.53483
gene-BW25113_0294	ecpR	CP009273.1	-	306457	307047	1.98816	0.431308	0.301989
gene-BW25113_0295	ykgL	CP009273.1	+	307823	308050	35.6711	7.73843	5.41821
gene-BW25113_0296	ykgM	CP009273.1	-	308225	308488	52.8547	11.4662	8.0283
gene-BW25113_0297	eaeH	CP009273.1	+	310068	310939	2.32347	0.504051	0.352921
gene-BW25113_0298	insE1	CP009273.1	+	311002	311301	47.739	10.3564	7.25127
gene-BW25113_0299	insF1	CP009273.1	+	311298	312164	32.9494	7.14801	5.00482
gene-BW25113_0300	ykgA	CP009273.1	-	312197	312880	30.8626	6.69528	4.68784
gene-BW25113_0301	rclC	CP009273.1	-	313437	314030	5.69697	1.23589	0.865335
gene-BW25113_0303	rclB	CP009273.1	-	314042	314278	1.66245	0.360649	0.252516
gene-BW25113_0304	rclA	CP009273.1	-	314387	315712	4.69004	1.01745	0.712389
gene-BW25113_0305	rclR	CP009273.1	+	315938	316792	17.8491	3.87216	2.71117
gene-BW25113_0306	ykgE	CP009273.1	+	317319	318038	375.757	81.5162	57.0752
gene-BW25113_0307	ykgF	CP009273.1	+	318049	319476	151.071	32.7732	22.9468
gene-BW25113_0308	ykgG	CP009273.1	+	319469	320164	89.2306	19.3576	13.5536
gene-BW25113_0310	ykgH	CP009273.1	-	320407	321075	6.9133	1.49976	1.05009
gene-BW25113_0311	betA	CP009273.1	-	321288	322958	166.175	36.0498	25.241
gene-BW25113_0312	betB	CP009273.1	-	322972	324444	226.796	49.2009	34.449
gene-BW25113_0313	betI	CP009273.1	-	324458	325045	273.361	59.3025	41.5218
gene-BW25113_0314	betT	CP009273.1	+	325174	327207	97.5777	21.1684	14.8215
gene-BW25113_0315	yahA	CP009273.1	+	328082	329170	36.5133	7.92115	5.54615
gene-BW25113_0316	yahB	CP009273.1	-	329212	330144	84.2069	18.2677	12.7905
gene-BW25113_0317	yahC	CP009273.1	-	330236	330733	5.20482	1.12913	0.79058
gene-BW25113_0318	yahD	CP009273.1	+	330991	331596	26.1766	5.67871	3.97606
gene-BW25113_0319	yahE	CP009273.1	+	331636	332499	3.99363	0.866373	0.606609
gene-BW25113_0320	yahF	CP009273.1	+	332489	334036	0.991871	0.215175	0.150659
gene-BW25113_0321	yahG	CP009273.1	+	334036	335454	5.89503	1.27886	0.895418
gene-BW25113_0323	yahI	CP009273.1	+	335876	336826	8.39958	1.82219	1.27584
gene-BW25113_0324	yahJ	CP009273.1	+	336836	338218	41.4129	8.98405	6.29036
gene-BW25113_0325	yahK	CP009273.1	+	338595	339644	30.8924	6.70175	4.69236
gene-BW25113_0326	yahL	CP009273.1	+	339887	340702	2.30637	0.500341	0.350324
gene-BW25113_0327	yahM	CP009273.1	+	341115	341360	78.6463	17.0614	11.9459
gene-BW25113_0328	yahN	CP009273.1	-	341377	342048	110.246	23.9165	16.7456
gene-BW25113_0329	yahO	CP009273.1	+	342195	342470	52.2645	11.3382	7.93866
gene-BW25113_0330	prpR	CP009273.1	-	342568	344154	5.83869	1.26664	0.886861
gene-BW25113_0331	prpB	CP009273.1	+	344393	345283	10.5847	2.29624	1.60776
gene-BW25113_0333	prpC	CP009273.1	+	345723	346892	4.79829	1.04093	0.728831
gene-BW25113_0334	prpD	CP009273.1	+	346926	348377	3.24036	0.702959	0.492191
gene-BW25113_0335	prpE	CP009273.1	+	348417	350303	6.91044	1.49914	1.04965
gene-BW25113_0336	codB	CP009273.1	+	350633	351892	34.0866	7.3947	5.17755
gene-BW25113_0337	codA	CP009273.1	+	351882	353165	121.764	26.4153	18.4952
gene-BW25113_0338	cynR	CP009273.1	-	353502	354401	33.78	7.32819	5.13098
gene-BW25113_0339	cynT	CP009273.1	+	354510	355169	10.8485	2.35346	1.64782
gene-BW25113_0340	cynS	CP009273.1	+	355200	355670	14.1932	3.07905	2.15586
gene-BW25113_0341	cynX	CP009273.1	+	355703	356857	10.3472	2.2447	1.57167
gene-BW25113_0342	lacA	CP009273.1	-	356960	357571	6.23203	1.35197	0.946607
gene-BW25113_0343	lacY	CP009273.1	-	357637	358890	5.47368	1.18745	0.831419
gene-BW25113_0344	lacZ	CP009273.1	-	358942	360066	2.84711	0.617648	0.432459
gene-BW25113_0345	lacI	CP009273.1	-	360661	361743	121.613	26.3826	18.4723
gene-BW25113_0346	mhpR	CP009273.1	-	361820	362653	25.4424	5.51945	3.86455
gene-BW25113_0347	mhpA	CP009273.1	+	362844	364508	2.37297	0.51479	0.36044
gene-BW25113_0348	mhpB	CP009273.1	+	364510	365454	2.97037	0.644388	0.451181
gene-BW25113_0349	mhpC	CP009273.1	+	365457	367561	51.1737	11.1016	7.77298
gene-BW25113_0350	mhpD	CP009273.1	+	367571	368380	108.021	23.4339	16.4077
gene-BW25113_0351	mhpF	CP009273.1	+	368377	369327	95.7714	20.7765	14.5471
gene-BW25113_0352	mhpE	CP009273.1	+	369324	370337	73.3378	15.9098	11.1396
gene-BW25113_0353	mhpT	CP009273.1	+	370915	372126	21.5512	4.67528	3.27349
gene-BW25113_0354	yaiL	CP009273.1	+	372228	372767	449.761	97.5706	68.316
gene-BW25113_0355	frmB	CP009273.1	-	372991	373824	429.682	93.2147	65.2661
gene-BW25113_0356	frmA	CP009273.1	-	373918	375027	694.39	150.64	105.474
gene-BW25113_0357	frmR	CP009273.1	-	375062	375337	820.464	177.99	124.623
gene-BW25113_0358	yaiO	CP009273.1	-	375525	376298	11.8953	2.58056	1.80683
gene-BW25113_0360	insC1	CP009273.1	+	376807	377172	120.293	26.0962	18.2718
gene-BW25113_0361	insD1	CP009273.1	+	377130	378035	63.9705	13.8777	9.71673
gene-BW25113_0363	yaiP	CP009273.1	-	378195	379391	5.15967	1.11933	0.783723
gene-BW25113_0364	yaiS	CP009273.1	-	379515	380072	1.60215	0.347568	0.243357
gene-BW25113_0365	tauA	CP009273.1	+	380688	381650	3.3986	0.737289	0.516227
gene-BW25113_0366	tauB	CP009273.1	+	381663	382430	2.94792	0.639517	0.447771
gene-BW25113_0367	tauC	CP009273.1	+	382427	383254	3.35628	0.728107	0.509798
gene-BW25113_0368	tauD	CP009273.1	+	383251	384102	19.6174	4.25577	2.97976
gene-BW25113_0369	hemB	CP009273.1	-	384209	385183	672.082	145.801	102.085
gene-BW25113_0372	insF1	CP009273.1	-	387195	388061	39.2463	8.51403	5.96127
gene-BW25113_0373	insE1	CP009273.1	-	388058	388357	81.6024	17.7027	12.3949
gene-BW25113_0375	yaiV	CP009273.1	+	389962	390585	11.9856	2.60013	1.82054
gene-BW25113_0376	ampH	CP009273.1	-	390586	391743	120.007	26.0341	18.2283
gene-BW25113_0377	sbmA	CP009273.1	+	392095	393315	68.6413	14.8909	10.4262
gene-BW25113_0378	yaiW	CP009273.1	+	393328	394422	123.051	26.6945	18.6907
gene-BW25113_0379	yaiY	CP009273.1	-	394481	394789	23.9806	5.20231	3.6425
gene-BW25113_0380	yaiZ	CP009273.1	+	395049	395261	417.46	90.5632	63.4096
gene-BW25113_0381	ddlA	CP009273.1	-	395285	396379	761.395	165.176	115.651
gene-BW25113_0382	iraP	CP009273.1	+	396842	397102	190.713	41.3729	28.9681
gene-BW25113_0383	phoA	CP009273.1	+	397203	398618	33.0614	7.1723	5.02183
gene-BW25113_0384	psiF	CP009273.1	+	398737	399057	45.9688	9.97242	6.98239
gene-BW25113_0385	yaiC	CP009273.1	+	399159	400274	17.3737	3.76902	2.63895
gene-BW25113_0386	proC	CP009273.1	-	400291	401100	351.627	76.2815	53.41
gene-BW25113_0387	yaiI	CP009273.1	+	401220	401678	228.902	49.6577	34.7688
gene-BW25113_0388	aroL	CP009273.1	+	401861	402385	287.497	62.3692	43.6691
gene-BW25113_0389	yaiA	CP009273.1	+	402435	402626	274.906	59.6378	41.7566
gene-BW25113_0390	aroM	CP009273.1	+	402884	403561	105.853	22.9635	16.0783
gene-BW25113_0391	yaiE	CP009273.1	+	403633	403917	1223.97	265.527	185.914
gene-BW25113_0392	ykiA	CP009273.1	+	404065	404406	91.4181	19.8321	13.8859
gene-BW25113_0393	rdgC	CP009273.1	-	404564	405475	462.063	100.239	70.1845
gene-BW25113_0394	mak	CP009273.1	+	405600	406508	151.831	32.9379	23.0621
gene-BW25113_0396	araJ	CP009273.1	-	406753	407937	45.838	9.94403	6.96251
gene-BW25113_0397	sbcC	CP009273.1	-	408063	411209	96.1528	20.8593	14.605
gene-BW25113_0398	sbcD	CP009273.1	-	411206	412408	99.8555	21.6625	15.1674
gene-BW25113_0399	phoB	CP009273.1	+	412598	413287	88.2638	19.1478	13.4067
gene-BW25113_0400	phoR	CP009273.1	+	413345	414640	34.3781	7.45793	5.22182
gene-BW25113_0401	brnQ	CP009273.1	+	415047	416366	204.904	44.4515	31.1236
gene-BW25113_0402	proY	CP009273.1	+	416442	417815	218.014	47.2956	33.115
gene-BW25113_0403	malZ	CP009273.1	+	417974	419788	48.4534	10.5114	7.35978
gene-BW25113_0404	acpH	CP009273.1	-	419793	420374	66.4742	14.4208	10.097
gene-BW25113_0405	queA	CP009273.1	+	420467	421537	290.364	62.9912	44.1045
gene-BW25113_0406	tgt	CP009273.1	+	421593	422720	1455.47	315.748	221.077
gene-BW25113_0407	yajC	CP009273.1	+	422743	423075	4297.79	932.356	652.807
gene-BW25113_0408	secD	CP009273.1	+	423103	424950	1731.46	375.62	262.998
gene-BW25113_0409	secF	CP009273.1	+	424961	425932	1877.63	407.33	285.2
gene-BW25113_0410	yajD	CP009273.1	+	426061	426408	324.149	70.3205	49.2363
gene-BW25113_0411	tsx	CP009273.1	-	426585	427469	7369.49	1598.73	1119.38
gene-BW25113_0412	yajI	CP009273.1	-	427768	428307	39.25	8.51484	5.96183
gene-BW25113_0413	nrdR	CP009273.1	+	428458	428907	838.651	181.936	127.386
gene-BW25113_0414	ribD	CP009273.1	+	428911	430014	584.534	126.808	88.7871
gene-BW25113_0415	ribE	CP009273.1	+	430103	430573	1759.08	381.613	267.194
gene-BW25113_0416	nusB	CP009273.1	+	430593	431012	2192.81	475.705	333.074
gene-BW25113_0417	thiL	CP009273.1	+	431090	432067	223.418	48.4681	33.9359
gene-BW25113_0418	pgpA	CP009273.1	+	432045	432563	791.697	171.75	120.254
gene-BW25113_0419	yajO	CP009273.1	-	432617	433591	234.385	50.8471	35.6016
gene-BW25113_0420	dxs	CP009273.1	-	433771	435633	470.191	102.003	71.4192
gene-BW25113_0421	ispA	CP009273.1	-	435658	436557	637.955	138.397	96.9015
gene-BW25113_0422	xseB	CP009273.1	-	436557	436799	761.219	165.138	115.625
gene-BW25113_0423	thiI	CP009273.1	+	437005	438453	525.772	114.06	79.8615
gene-BW25113_0424	yajL	CP009273.1	-	438507	439097	240.217	52.1123	36.4875
gene-BW25113_0425	panE	CP009273.1	-	439060	439971	254.714	55.2572	38.6894
gene-BW25113_0426	yajQ	CP009273.1	+	440139	440630	1729.29	375.149	262.668
gene-BW25113_0427	yajR	CP009273.1	-	440758	442122	89.0051	19.3087	13.5193
gene-BW25113_0428	cyoE	CP009273.1	-	442271	443161	9491.63	2059.1	1441.72
gene-BW25113_0429	cyoD	CP009273.1	-	443173	443502	11000.7	2386.49	1670.94
gene-BW25113_0430	cyoC	CP009273.1	-	443502	444116	9008.66	1954.33	1368.36
gene-BW25113_0431	cyoB	CP009273.1	-	444106	446097	8666.56	1880.11	1316.4
gene-BW25113_0432	cyoA	CP009273.1	-	446119	447066	10810.9	2345.3	1642.11
gene-BW25113_0433	ampG	CP009273.1	-	447526	449001	216.255	46.914	32.8478
gene-BW25113_0434	yajG	CP009273.1	-	449045	449623	1102.65	239.206	167.485
gene-BW25113_0435	bolA	CP009273.1	+	449928	450245	687.833	149.218	104.478
gene-BW25113_0436	tig	CP009273.1	+	450589	451887	14208.6	3082.4	2158.21
gene-BW25113_0437	clpP	CP009273.1	+	452133	452756	2941.65	638.158	446.819
gene-BW25113_0438	clpX	CP009273.1	+	452882	454156	3141.92	681.604	477.239
gene-BW25113_0439	lon	CP009273.1	+	454344	456698	3582.65	777.215	544.183
gene-BW25113_0440	hupB	CP009273.1	+	456907	457179	10805	2344.02	1641.21
gene-BW25113_0441	ppiD	CP009273.1	+	457371	459242	1289.45	279.732	195.86
gene-BW25113_0442	ybaV	CP009273.1	+	459393	459764	72.7258	15.777	11.0466
gene-BW25113_0443	fadM	CP009273.1	+	459858	460256	41.6491	9.0353	6.32625
gene-BW25113_0444	queC	CP009273.1	-	460308	461003	396.677	86.0545	60.2528
gene-BW25113_0445	ybaE	CP009273.1	-	461068	462768	105.655	22.9208	16.0484
gene-BW25113_0446	cof	CP009273.1	+	462868	463686	88.4713	19.1928	13.4383
gene-BW25113_0447	ybaO	CP009273.1	+	463839	464297	171.527	37.2109	26.0539
gene-BW25113_0448	mdlA	CP009273.1	+	464327	466099	66.1019	14.34	10.0405
gene-BW25113_0449	mdlB	CP009273.1	+	466092	467873	54.5816	11.8409	8.29061
gene-BW25113_0450	glnK	CP009273.1	+	468054	468392	3.54867	0.769844	0.539022
gene-BW25113_0451	amtB	CP009273.1	+	468422	469708	30.4429	6.60424	4.62409
gene-BW25113_0452	tesB	CP009273.1	-	469757	470617	189.664	41.1455	28.8089
gene-BW25113_0453	ybaY	CP009273.1	+	470835	471407	125.855	27.3028	19.1166
gene-BW25113_0454	ybaZ	CP009273.1	-	471438	471827	74.4872	16.1591	11.3141
gene-BW25113_0455	ffs	CP009273.1	+	471904	472017	33.0702	7.1742	5.02316
gene-BW25113_0456	ybaA	CP009273.1	+	472128	472481	58.0452	12.5922	8.81671
gene-BW25113_0457	ylaB	CP009273.1	-	472523	474073	68.766	14.918	10.4451
gene-BW25113_0458	ylaC	CP009273.1	-	474237	474707	773.172	167.731	117.44
gene-BW25113_0459	maa	CP009273.1	-	474823	475374	279.498	60.634	42.4541
gene-BW25113_0460	hha	CP009273.1	-	475546	475764	905.306	196.396	137.51
gene-BW25113_0461	tomB	CP009273.1	-	475790	476164	321.24	69.6894	48.7944
gene-BW25113_0462	acrB	CP009273.1	-	476710	479859	1173.23	254.519	178.207
gene-BW25113_0463	acrA	CP009273.1	-	479882	481075	1039.8	225.574	157.94
gene-BW25113_0464	acrR	CP009273.1	+	481217	481864	228.722	49.6187	34.7415
gene-BW25113_0465	mscK	CP009273.1	+	481992	485354	156.87	34.0312	23.8276
gene-BW25113_0466	ybaM	CP009273.1	-	485566	485727	116.784	25.3349	17.7388
gene-BW25113_0467	priC	CP009273.1	-	485741	486268	94.053	20.4037	14.2861
gene-BW25113_0468	ybaN	CP009273.1	+	486338	486715	354.643	76.9357	53.8681
gene-BW25113_0469	apt	CP009273.1	+	486868	487419	1118.52	242.651	169.897
gene-BW25113_0470	dnaX	CP009273.1	+	487548	489479	490.511	106.411	74.5056
gene-BW25113_0471	ybaB	CP009273.1	+	489532	489861	0.881194	0.191165	0.133848
gene-BW25113_0472	recR	CP009273.1	+	489861	490466	1550.58	336.381	235.524
gene-BW25113_0473	htpG	CP009273.1	+	490576	492450	2370.57	514.268	360.075
gene-BW25113_0474	adk	CP009273.1	+	492631	493275	2275.33	493.606	345.608
gene-BW25113_0475	hemH	CP009273.1	+	493511	494473	136.848	29.6877	20.7864
gene-BW25113_0476	aes	CP009273.1	-	494470	495429	27.9792	6.06976	4.24986
gene-BW25113_0477	gsk	CP009273.1	+	495581	496885	229.585	49.8058	34.8725
gene-BW25113_0478	ybaL	CP009273.1	-	497018	498694	342.778	74.3618	52.0659
gene-BW25113_0479	fsr	CP009273.1	-	498932	500152	73.2613	15.8932	11.1279
gene-BW25113_0480	ushA	CP009273.1	+	500370	502022	202.63	43.9584	30.7783
gene-BW25113_0481	ybaK	CP009273.1	-	502059	502538	157.81	34.2352	23.9704
gene-BW25113_0482	ybaP	CP009273.1	-	502742	503536	209.85	45.5246	31.875
gene-BW25113_0483	ybaQ	CP009273.1	+	503674	504015	684.994	148.602	104.046
gene-BW25113_0484	copA	CP009273.1	-	504331	506835	66.5497	14.4372	10.1085
gene-BW25113_0485	glsA	CP009273.1	+	507097	508029	9.34619	2.02755	1.41963
gene-BW25113_0486	ybaT	CP009273.1	+	508032	509324	11.1763	2.42458	1.69762
gene-BW25113_0487	cueR	CP009273.1	+	509449	509856	155.012	33.6281	23.5454
gene-BW25113_0488	ybbJ	CP009273.1	-	509857	510315	129.87	28.1738	19.7265
gene-BW25113_0489	qmcA	CP009273.1	-	510312	511229	149.117	32.3493	22.65
gene-BW25113_0490	fetA	CP009273.1	+	511375	512052	155.157	33.6596	23.5674
gene-BW25113_0491	fetB	CP009273.1	+	512039	512818	110.343	23.9376	16.7604
gene-BW25113_0492	ybbN	CP009273.1	-	512881	513735	763.22	165.572	115.928
gene-BW25113_0493	ybbO	CP009273.1	-	513796	514605	244.835	53.1142	37.189
gene-BW25113_0494	tesA	CP009273.1	-	514595	515221	201.396	43.6906	30.5909
gene-BW25113_0495	ybbA	CP009273.1	+	515189	515875	49.655	10.7721	7.54229
gene-BW25113_0496	ybbP	CP009273.1	+	515872	518286	25.1404	5.45392	3.81867
gene-BW25113_0497	rhsD	CP009273.1	+	518717	522997	9.81815	2.12994	1.49132
gene-BW25113_0498	ybbC	CP009273.1	+	523037	523405	14.7859	3.20763	2.24589
gene-BW25113_0499	rhsH	CP009273.1	+	523408	524115	16.8597	3.65751	2.56088
gene-BW25113_0501	ybbD	CP009273.1	+	524096	524586	3.41214	0.740225	0.518283
gene-BW25113_0502	ylbG	CP009273.1	-	525051	525472	62.545	13.5684	9.50021
gene-BW25113_0503	mnmH	CP009273.1	-	525588	526682	89.5717	19.4316	13.6054
gene-BW25113_0504	allS	CP009273.1	-	526751	527677	9.03021	1.959	1.37163
gene-BW25113_0505	allA	CP009273.1	+	527907	528389	37.2609	8.08332	5.6597
gene-BW25113_0506	allR	CP009273.1	+	528467	529282	407.504	88.4033	61.8973
gene-BW25113_0507	gcl	CP009273.1	+	529372	531153	8.64198	1.87478	1.31266
gene-BW25113_0508	hyi	CP009273.1	+	531166	531942	2.74646	0.595813	0.41717
gene-BW25113_0509	glxR	CP009273.1	+	532042	532920	8.57907	1.86113	1.30311
gene-BW25113_0511	ybbW	CP009273.1	+	533089	534543	0.898555	0.194931	0.136485
gene-BW25113_0512	allB	CP009273.1	+	534603	535964	7.70118	1.67068	1.16976
gene-BW25113_0513	ybbY	CP009273.1	+	536021	537322	4.14055	0.898246	0.628925
gene-BW25113_0514	glxK	CP009273.1	+	537344	538489	10.4302	2.26271	1.58428
gene-BW25113_0515	allE	CP009273.1	-	538717	539502	51.5611	11.1856	7.83181
gene-BW25113_0516	allC	CP009273.1	-	539513	540748	27.106	5.88033	4.11723
gene-BW25113_0517	allD	CP009273.1	-	540770	541819	6.48095	1.40597	0.984417
gene-BW25113_0518	fdrA	CP009273.1	+	542136	543803	3.20802	0.695944	0.487279
gene-BW25113_0520	ylbF	CP009273.1	+	545083	545898	6.5288	1.41635	0.991685
gene-BW25113_0521	ybcF	CP009273.1	+	545895	546788	13.0274	2.82615	1.97878
gene-BW25113_0522	purK	CP009273.1	-	546983	548050	113.742	24.675	17.2767
gene-BW25113_0523	purE	CP009273.1	-	548047	548556	122.38	26.549	18.5888
gene-BW25113_0524	lpxH	CP009273.1	-	548674	549396	507.744	110.149	77.1232
gene-BW25113_0525	ppiB	CP009273.1	-	549399	549893	4075.48	884.128	619.04
gene-BW25113_0526	cysS	CP009273.1	+	550067	551452	486.971	105.643	73.9679
gene-BW25113_0527	ybcI	CP009273.1	-	551488	552009	22.1973	4.81546	3.37164
gene-BW25113_0528	ybcJ	CP009273.1	-	552117	552329	335.249	72.7284	50.9222
gene-BW25113_0529	folD	CP009273.1	-	552331	553197	487.888	105.842	74.1072
gene-BW25113_0530	sfmA	CP009273.1	+	553668	554210	3.3628	0.729521	0.510789
gene-BW25113_0531	sfmC	CP009273.1	+	554430	555122	3.50072	0.759442	0.531738
gene-BW25113_0532	sfmD	CP009273.1	+	555153	557756	3.66897	0.795942	0.557294
gene-BW25113_0533	sfmH	CP009273.1	+	557792	558775	2.18699	0.474443	0.332191
gene-BW25113_0534	sfmF	CP009273.1	+	558786	559301	3.96585	0.860346	0.602389
gene-BW25113_0535	sfmZ	CP009273.1	-	559304	559936	4.52607	0.981878	0.687482
gene-BW25113_0536	argU	CP009273.1	+	560179	560255	70.2208	15.2336	10.6661
gene-BW25113_0537	intD	CP009273.1	-	560271	561434	197.295	42.8008	29.9679
gene-BW25113_0539	exoD	CP009273.1	-	561554	561832	16.4444	3.56744	2.49781
gene-BW25113_0540	insE1	CP009273.1	+	562298	562597	57.218	12.4128	8.69106
gene-BW25113_0541	insF1	CP009273.1	+	562594	563460	38.6818	8.39158	5.87553
gene-BW25113_0542	renD	CP009273.1	+	562140	563703	61.5503	13.3526	9.34911
gene-BW25113_0543	emrE	CP009273.1	+	563771	564103	111.45	24.1779	16.9286
gene-BW25113_0544	ybcK	CP009273.1	+	564358	565884	4.38376	0.951007	0.665866
gene-BW25113_0545	ybcL	CP009273.1	+	566349	566900	7.49275	1.62547	1.1381
gene-BW25113_0546	ybcM	CP009273.1	+	566910	567707	16.7907	3.64256	2.55041
gene-BW25113_0547	ybcN	CP009273.1	+	567922	568377	6.70517	1.45461	1.01847
gene-BW25113_0548	ninE	CP009273.1	+	568377	568547	2.21085	0.479619	0.335815
gene-BW25113_0549	ybcO	CP009273.1	+	568540	568830	3.21684	0.697856	0.488618
gene-BW25113_0550	rusA	CP009273.1	+	568827	569189	2.25767	0.489776	0.342927
gene-BW25113_0551	quuD	CP009273.1	+	569412	569795	8.69271	1.88578	1.32037
gene-BW25113_0552	insH1	CP009273.1	-	570193	571209	169.804	36.837	25.7921
gene-BW25113_0553	nmpC	CP009273.1	-	569985	572281	1870.89	405.869	284.177
gene-BW25113_0554	essD	CP009273.1	+	572854	573069	12.9857	2.8171	1.97245
gene-BW25113_0555	rrrD	CP009273.1	+	573069	573566	17.7381	3.84808	2.69431
gene-BW25113_0556	rzpD	CP009273.1	+	573563	574024	18.3951	3.9906	2.7941
gene-BW25113_0557	borD	CP009273.1	-	574056	574349	374.944	81.3397	56.9516
gene-BW25113_0558	ybcV	CP009273.1	-	574640	575050	2.12652	0.461325	0.323006
gene-BW25113_0559	ybcW	CP009273.1	+	575336	575542	52.8406	11.4632	8.02616
gene-BW25113_0560	nohD	CP009273.1	+	576290	576835	8.32583	1.80619	1.26464
gene-BW25113_0561	tfaD	CP009273.1	+	577116	577553	9.91511	2.15097	1.50605
gene-BW25113_0562	ybcY	CP009273.1	-	577608	578262	28.6366	6.21239	4.34973
gene-BW25113_0563	tfaX	CP009273.1	+	578409	578591	21.5137	4.66714	3.26779
gene-BW25113_0564	appY	CP009273.1	+	579137	579886	12.756	2.76727	1.93756
gene-BW25113_0565	ompT	CP009273.1	-	580136	581089	1482.1	321.524	225.121
gene-BW25113_0566	envY	CP009273.1	-	581603	582364	14.3084	3.10404	2.17336
gene-BW25113_0567	ybcH	CP009273.1	-	582547	583437	19.8373	4.30347	3.01316
gene-BW25113_0568	nfrA	CP009273.1	-	583438	586410	35.964	7.80199	5.46272
gene-BW25113_0569	nfrB	CP009273.1	-	586397	588634	22.2301	4.82256	3.37661
gene-BW25113_0570	cusS	CP009273.1	-	588784	590226	32.7499	7.10472	4.97451
gene-BW25113_0571	cusR	CP009273.1	-	590216	590899	77.5495	16.8235	11.7793
gene-BW25113_0572	cusC	CP009273.1	+	591056	592429	3.14847	0.683025	0.478234
gene-BW25113_0573	cusF	CP009273.1	+	592587	592919	4.66967	1.01303	0.709294
gene-BW25113_0574	cusB	CP009273.1	+	592935	594158	6.3415	1.37572	0.963235
gene-BW25113_0575	cusA	CP009273.1	+	594170	597313	8.29962	1.80051	1.26066
gene-BW25113_0576	pheP	CP009273.1	+	597415	598791	253.093	54.9056	38.4433
gene-BW25113_0577	ybdG	CP009273.1	-	598872	600119	215.501	46.7504	32.7333
gene-BW25113_0578	nfsB	CP009273.1	-	600227	600880	1013.44	219.854	153.935
gene-BW25113_0579	ybdF	CP009273.1	-	600974	601342	117.767	25.5482	17.8881
gene-BW25113_0580	ybdJ	CP009273.1	-	601407	601655	97.502	21.152	14.81
gene-BW25113_0581	ybdK	CP009273.1	-	601721	602839	16.4835	3.5759	2.50374
gene-BW25113_0582	insL1	CP009273.1	+	603521	604633	407.028	88.3002	61.8251
gene-BW25113_0583	entD	CP009273.1	-	604915	605535	80.3865	17.4389	12.2102
gene-BW25113_0584	fepA	CP009273.1	-	605710	607950	317.073	68.7854	48.1615
gene-BW25113_0585	fes	CP009273.1	+	608193	609395	322.785	70.0245	49.029
gene-BW25113_0586	entF	CP009273.1	+	609613	613494	175.518	38.0767	26.6601
gene-BW25113_0587	fepE	CP009273.1	+	613710	614843	11.1543	2.4198	1.69427
gene-BW25113_0588	fepC	CP009273.1	-	614840	615655	263.146	57.0866	39.9703
gene-BW25113_0589	fepG	CP009273.1	-	615652	616644	132.443	28.732	20.1172
gene-BW25113_0590	fepD	CP009273.1	-	616641	617645	146.422	31.7645	22.2406
gene-BW25113_0591	entS	CP009273.1	+	617756	619006	206.886	44.8816	31.4248
gene-BW25113_0592	fepB	CP009273.1	-	619010	619966	131.604	28.55	19.9898
gene-BW25113_0593	entC	CP009273.1	+	620341	621516	375.967	81.5617	57.1071
gene-BW25113_0594	entE	CP009273.1	+	621526	623136	412.488	89.4845	62.6544
gene-BW25113_0595	entB	CP009273.1	+	623150	624007	455.385	98.7906	69.1702
gene-BW25113_0596	entA	CP009273.1	+	624007	624753	348.696	75.6457	52.9648
gene-BW25113_0597	entH	CP009273.1	+	624756	625169	323.826	70.2504	49.1872
gene-BW25113_0598	cstA	CP009273.1	+	625350	627455	255.798	55.4925	38.8542
gene-BW25113_0599	ybdH	CP009273.1	-	627845	628933	55.6419	12.0709	8.45166
gene-BW25113_0600	ybdL	CP009273.1	+	629042	630202	36.8458	7.99328	5.59665
gene-BW25113_0601	ybdM	CP009273.1	-	630203	630832	27.1262	5.88472	4.1203
gene-BW25113_0602	ybdN	CP009273.1	-	630805	632025	8.85217	1.92038	1.34459
gene-BW25113_0603	ybdO	CP009273.1	-	632172	633074	5.06866	1.09959	0.769898
gene-BW25113_0604	dsbG	CP009273.1	-	633283	634029	106.627	23.1314	16.1959
gene-BW25113_0605	ahpC	CP009273.1	+	634401	634964	8974.91	1947	1363.23
gene-BW25113_0606	ahpF	CP009273.1	+	635209	636774	728.899	158.126	110.715
gene-BW25113_0607	uspG	CP009273.1	-	636895	637323	717.977	155.757	109.056
gene-BW25113_0608	ybdR	CP009273.1	+	637544	638782	23.5448	5.10778	3.57631
gene-BW25113_0610	rnk	CP009273.1	-	639013	639423	670.854	145.534	101.899
gene-BW25113_0611	rna	CP009273.1	-	639653	640459	365.71	79.3366	55.5491
gene-BW25113_0612	citT	CP009273.1	-	640573	642036	6.88866	1.49442	1.04635
gene-BW25113_0613	citG	CP009273.1	-	642087	642965	6.25448	1.35684	0.950018
gene-BW25113_0614	citX	CP009273.1	-	642940	643491	4.15092	0.900495	0.630499
gene-BW25113_0615	citF	CP009273.1	-	643495	645027	2.68232	0.581899	0.407428
gene-BW25113_0616	citE	CP009273.1	-	645038	645946	5.16392	1.12025	0.784367
gene-BW25113_0617	citD	CP009273.1	-	645943	646239	3.55556	0.771337	0.540067
gene-BW25113_0618	citC	CP009273.1	-	646254	647312	3.64589	0.790935	0.553789
gene-BW25113_0619	citA	CP009273.1	+	647691	649349	29.1266	6.31868	4.42415
gene-BW25113_0620	citB	CP009273.1	+	649318	649998	49.9295	10.8316	7.58398
gene-BW25113_0621	dcuC	CP009273.1	-	650039	651424	291.025	63.1346	44.205
gene-BW25113_0622	pagP	CP009273.1	+	652013	652573	41.3529	8.97105	6.28126
gene-BW25113_0623	cspE	CP009273.1	+	652748	652957	63819.3	13844.9	9693.76
gene-BW25113_0624	flc	CP009273.1	-	653011	653394	147.109	31.9137	22.345
gene-BW25113_0627	tatE	CP009273.1	+	654403	654606	465.015	100.88	70.6329
gene-BW25113_0628	lipA	CP009273.1	-	654707	655672	1926.69	417.974	292.653
gene-BW25113_0629	ybeF	CP009273.1	-	655881	656834	33.24	7.21105	5.04896
gene-BW25113_0630	lipB	CP009273.1	-	657093	657734	281.48	61.0638	42.7551
gene-BW25113_0631	ybeD	CP009273.1	-	657835	658098	905	196.329	137.464
gene-BW25113_0632	dacA	CP009273.1	-	658208	659419	526	114.11	79.8962
gene-BW25113_0633	rlpA	CP009273.1	-	659558	660646	557.212	120.881	84.6371
gene-BW25113_0634	mrdB	CP009273.1	-	660657	661769	415.612	90.1623	63.1289
gene-BW25113_0635	mrdA	CP009273.1	-	661772	663673	255.274	55.3789	38.7746
gene-BW25113_0636	rlmH	CP009273.1	-	663704	664171	605.158	131.282	91.9198
gene-BW25113_0637	rsfS	CP009273.1	-	664175	664492	905.107	196.353	137.48
gene-BW25113_0638	cobC	CP009273.1	-	664752	665363	101.098	21.9321	15.3562
gene-BW25113_0639	nadD	CP009273.1	-	665387	666028	213.43	46.3012	32.4187
gene-BW25113_0640	holA	CP009273.1	-	666030	667061	0.344391	0.074712	0.052311
gene-BW25113_0641	lptE	CP009273.1	-	667061	667642	1465.11	317.84	222.542
gene-BW25113_0642	leuS	CP009273.1	-	667657	670239	1521.71	330.118	231.139
gene-BW25113_0643	ybeL	CP009273.1	+	670474	670956	270.816	58.7504	41.1353
gene-BW25113_0644	ybeQ	CP009273.1	-	671026	672003	24.502	5.31544	3.72171
gene-BW25113_0645	ybeR	CP009273.1	+	672167	672874	2.04661	0.443989	0.310868
gene-BW25113_0646	djlB	CP009273.1	+	672871	674298	7.7423	1.6796	1.17601
gene-BW25113_0647	ybeT	CP009273.1	-	674308	674862	2.08468	0.452249	0.316651
gene-BW25113_0648	ybeU	CP009273.1	+	674964	675671	5.21203	1.13069	0.791675
gene-BW25113_0649	djlC	CP009273.1	+	675668	677119	21.2065	4.60052	3.22114
gene-BW25113_0650	hscC	CP009273.1	-	677179	678849	28.3615	6.1527	4.30793
gene-BW25113_0651	rihA	CP009273.1	-	678933	679868	699.659	151.783	106.274
gene-BW25113_0652	gltL	CP009273.1	-	679986	680711	158.975	34.4879	24.1474
gene-BW25113_0653	gltK	CP009273.1	-	680711	681385	94.8723	20.5815	14.4105
gene-BW25113_0654	gltJ	CP009273.1	-	681385	682125	74.0078	16.0552	11.2413
gene-BW25113_0655	gltI	CP009273.1	-	682295	683203	255.75	55.4821	38.8469
gene-BW25113_0656	insH1	CP009273.1	-	683453	684469	125.799	27.2907	19.1081
gene-BW25113_0657	lnt	CP009273.1	-	684799	686337	242.283	52.5605	36.8013
gene-BW25113_0658	ybeX	CP009273.1	-	686362	687240	1093.69	237.264	166.125
gene-BW25113_0659	ybeY	CP009273.1	-	687330	687797	1104.21	239.546	167.723
gene-BW25113_0660	ybeZ	CP009273.1	-	687794	688834	1002.62	217.508	152.292
gene-BW25113_0661	miaB	CP009273.1	-	688987	690411	615.902	133.613	93.5517
gene-BW25113_0662	ubiF	CP009273.1	+	690557	691732	251.646	54.5918	38.2235
gene-BW25113_0664	glnX	CP009273.1	-	691886	691960	1804.83	391.538	274.143
gene-BW25113_0665	glnV	CP009273.1	-	691998	692072	2853.4	619.013	433.414
gene-BW25113_0666	metU	CP009273.1	-	692120	692196	3671.43	796.475	557.668
gene-BW25113_0668	glnW	CP009273.1	-	692212	692286	7184.45	1558.59	1091.27
gene-BW25113_0670	glnU	CP009273.1	-	692321	692395	7642.24	1657.9	1160.81
gene-BW25113_0672	leuW	CP009273.1	-	692419	692503	6210.92	1347.39	943.4
gene-BW25113_0673	metT	CP009273.1	-	692513	692589	4804.13	1042.2	729.718
gene-BW25113_0674	asnB	CP009273.1	-	692969	694633	227.048	49.2555	34.4872
gene-BW25113_0675	umpH	CP009273.1	-	695030	695782	520.211	112.854	79.0169
gene-BW25113_0676	nagC	CP009273.1	-	695830	697050	405.739	88.0204	61.6292
gene-BW25113_0677	nagA	CP009273.1	-	697059	698207	683.317	148.238	103.792
gene-BW25113_0678	nagB	CP009273.1	-	698267	699067	1238.08	268.588	188.057
gene-BW25113_0679	nagE	CP009273.1	+	699400	701346	1196.01	259.46	181.666
gene-BW25113_0680	glnS	CP009273.1	+	701549	703213	1618.95	351.212	245.908
gene-BW25113_0681	chiP	CP009273.1	+	703790	705196	100.104	21.7164	15.2051
gene-BW25113_0682	chiQ	CP009273.1	+	705246	705572	40.4801	8.7817	6.14868
gene-BW25113_0683	fur	CP009273.1	-	705656	706102	2661.62	577.409	404.284
gene-BW25113_0684	fldA	CP009273.1	-	706391	706921	1145.44	248.491	173.986
gene-BW25113_0685	ybfE	CP009273.1	-	707061	707354	244.299	52.998	37.1076
gene-BW25113_0686	ybfF	CP009273.1	-	707494	708258	151.041	32.7665	22.9421
gene-BW25113_0687	seqA	CP009273.1	+	708443	708988	1271.42	275.819	193.12
gene-BW25113_0688	pgm	CP009273.1	+	709014	710654	1259.99	273.341	191.385
gene-BW25113_0689	ybfP	CP009273.1	+	710868	711362	38.6646	8.38786	5.87292
gene-BW25113_0691	ybfG	CP009273.1	-	711403	712053	5.76498	1.25065	0.875665
gene-BW25113_0692	potE	CP009273.1	-	712402	713721	12.0454	2.61311	1.82962
gene-BW25113_0693	speF	CP009273.1	-	713718	715916	5.78767	1.25557	0.879112
gene-BW25113_0694	kdpE	CP009273.1	-	716512	717189	42.2988	9.17624	6.42493
gene-BW25113_0695	kdpD	CP009273.1	-	717186	719870	27.4683	5.95894	4.17227
gene-BW25113_0696	kdpC	CP009273.1	-	719863	720435	17.63	3.82463	2.67789
gene-BW25113_0697	kdpB	CP009273.1	-	720444	722492	5.28404	1.14631	0.802613
gene-BW25113_0698	kdpA	CP009273.1	-	722515	724188	2.08108	0.451466	0.316103
gene-BW25113_0699	ybfA	CP009273.1	+	724590	724796	187.329	40.6388	28.4541
gene-BW25113_0700	rhsC	CP009273.1	+	725039	729232	12.6281	2.73953	1.91814
gene-BW25113_0702	ybfB	CP009273.1	+	729232	729558	2.84098	0.616318	0.431527
gene-BW25113_0703	rhsO	CP009273.1	+	729589	731109	5.50373	1.19397	0.835982
gene-BW25113_0704	ybfC	CP009273.1	+	731106	731675	1.72281	0.373743	0.261684
gene-BW25113_0705	ybfL	CP009273.1	+	732281	733417	3.26268	0.707801	0.495581
gene-BW25113_0706	ybfD	CP009273.1	+	733548	734309	3.05195	0.662086	0.463573
gene-BW25113_0707	ybgA	CP009273.1	+	734457	734966	25.8784	5.61403	3.93078
gene-BW25113_0708	phr	CP009273.1	+	734963	736381	39.8259	8.63978	6.04932
gene-BW25113_0709	dtpD	CP009273.1	-	736531	738012	24.587	5.33388	3.73462
gene-BW25113_0710	ybgI	CP009273.1	+	738283	739026	439.516	95.348	66.7598
gene-BW25113_0711	ybgJ	CP009273.1	+	739049	739705	340.688	73.9085	51.7485
gene-BW25113_0712	ybgK	CP009273.1	+	739699	740631	218.271	47.3514	33.154
gene-BW25113_0713	ybgL	CP009273.1	+	740621	741355	158.779	34.4454	24.1176
gene-BW25113_0714	nei	CP009273.1	+	741391	742182	83.0391	18.0144	12.6131
gene-BW25113_0715	abrB	CP009273.1	-	742179	743225	130.366	28.2814	19.8018
gene-BW25113_0716	ybgO	CP009273.1	-	743377	744438	17.8158	3.86493	2.70611
gene-BW25113_0717	ybgP	CP009273.1	-	744435	745163	4.21077	0.913478	0.63959
gene-BW25113_0718	ybgQ	CP009273.1	-	745178	747625	3.34314	0.725256	0.507802
gene-BW25113_0719	ybgD	CP009273.1	-	747685	748251	2.2328	0.484381	0.339149
gene-BW25113_0720	gltA	CP009273.1	-	748641	749924	994.957	215.845	151.128
gene-BW25113_0721	sdhC	CP009273.1	+	750633	751022	1025.7	222.514	155.797
gene-BW25113_0722	sdhD	CP009273.1	+	751016	751363	34.2594	7.43218	5.20379
gene-BW25113_0723	sdhA	CP009273.1	+	751363	753129	1497.01	324.758	227.386
gene-BW25113_0724	sdhB	CP009273.1	+	753145	753861	1938.27	420.485	294.411
gene-BW25113_0726	sucA	CP009273.1	+	754162	756963	2037.2	441.946	309.437
gene-BW25113_0727	sucB	CP009273.1	+	756978	758195	4062.49	881.31	617.067
gene-BW25113_0728	sucC	CP009273.1	+	758470	759636	3328.08	721.989	505.515
gene-BW25113_0729	sucD	CP009273.1	+	759636	760505	3556.81	771.609	540.258
gene-BW25113_0730	mngR	CP009273.1	-	760609	761331	88.1826	19.1302	13.3944
gene-BW25113_0731	mngA	CP009273.1	+	761440	763416	5.04773	1.09505	0.76672
gene-BW25113_0732	mngB	CP009273.1	+	763434	766067	26.8497	5.82473	4.0783
gene-BW25113_0733	cydA	CP009273.1	+	766914	768482	2264.11	491.174	343.905
gene-BW25113_0734	cydB	CP009273.1	+	768498	769637	1598.01	346.67	242.728
gene-BW25113_0735	ybgE	CP009273.1	+	769765	770058	791.283	171.66	120.191
gene-BW25113_0736	ybgC	CP009273.1	+	770208	770612	361.382	78.3977	54.8917
gene-BW25113_0737	tolQ	CP009273.1	+	770609	771301	403.96	87.6346	61.3591
gene-BW25113_0738	tolR	CP009273.1	+	771305	771733	375.378	81.4339	57.0176
gene-BW25113_0739	tolA	CP009273.1	+	771798	773063	443.149	96.1362	67.3117
gene-BW25113_0740	tolB	CP009273.1	+	773196	774488	1973.51	428.13	299.764
gene-BW25113_0741	pal	CP009273.1	+	774523	775044	7058.85	1531.34	1072.2
gene-BW25113_0742	ybgF	CP009273.1	+	775054	775845	2350.33	509.877	357.001
gene-BW25113_0743	lysT	CP009273.1	+	776010	776085	7960.99	1727.05	1209.23
gene-BW25113_0744	valT	CP009273.1	+	776221	776296	4793.7	1039.94	728.134
gene-BW25113_0745	lysW	CP009273.1	+	776299	776374	3003.32	651.536	456.186
gene-BW25113_0746	valZ	CP009273.1	+	776524	776599	1577.56	342.234	239.622
gene-BW25113_0747	lysY	CP009273.1	+	776603	776678	1189.21	257.985	180.633
gene-BW25113_0748	lysZ	CP009273.1	+	776825	776900	808.698	175.438	122.836
gene-BW25113_0749	lysQ	CP009273.1	+	777033	777108	198.27	43.0125	30.1161
gene-BW25113_0750	nadA	CP009273.1	+	777541	778584	63.2423	13.7197	9.60612
gene-BW25113_0751	pnuC	CP009273.1	+	778622	779341	68.1708	14.7889	10.3547
gene-BW25113_0752	zitB	CP009273.1	-	779338	780279	75.7877	16.4413	11.5117
gene-BW25113_0753	ybgS	CP009273.1	-	780393	780773	26.3255	5.71101	3.99868
gene-BW25113_0754	aroG	CP009273.1	+	781089	782141	735.677	159.597	111.745
gene-BW25113_0755	gpmA	CP009273.1	-	782299	783051	4264.87	925.215	647.807
gene-BW25113_0756	galM	CP009273.1	-	783253	784293	1103.19	239.324	167.567
gene-BW25113_0757	galK	CP009273.1	-	784287	785435	1199.91	260.307	182.259
gene-BW25113_0758	galT	CP009273.1	-	785439	786485	1900.79	412.355	288.718
gene-BW25113_0759	galE	CP009273.1	-	786495	787511	5489.76	1190.94	833.861
gene-BW25113_0760	modF	CP009273.1	-	787772	789244	440.035	95.4605	66.8386
gene-BW25113_0761	modE	CP009273.1	-	789312	790100	238.875	51.8211	36.2836
gene-BW25113_0762	acrZ	CP009273.1	+	790229	790378	204.287	44.3177	31.0299
gene-BW25113_0763	modA	CP009273.1	+	790545	791318	211.274	45.8334	32.0912
gene-BW25113_0764	modB	CP009273.1	+	791318	792007	131.791	28.5906	20.0182
gene-BW25113_0765	modC	CP009273.1	+	792010	793068	116.152	25.1979	17.6428
gene-BW25113_0766	ybhA	CP009273.1	-	793069	793887	232.062	50.3433	35.2488
gene-BW25113_0767	pgl	CP009273.1	+	794042	795037	624.397	135.456	94.842
gene-BW25113_0768	ybhD	CP009273.1	-	795078	796031	23.0922	5.0096	3.50757
gene-BW25113_0769	ybhH	CP009273.1	+	796215	797267	1.43595	0.311514	0.218112
gene-BW25113_0770	ybhI	CP009273.1	+	797343	798776	2.46862	0.535539	0.374968
gene-BW25113_0771	ybhJ	CP009273.1	+	798959	801220	13.1653	2.85607	1.99974
gene-BW25113_0772	ybhC	CP009273.1	-	801454	802737	521.2	113.068	79.1671
gene-BW25113_0773	ybhB	CP009273.1	-	802889	803365	123.686	26.8322	18.7871
gene-BW25113_0774	bioA	CP009273.1	-	803424	804713	13.3147	2.88848	2.02243
gene-BW25113_0775	bioB	CP009273.1	+	804800	805840	17.3266	3.75881	2.63181
gene-BW25113_0776	bioF	CP009273.1	+	805837	806991	11.1101	2.4102	1.68755
gene-BW25113_0777	bioC	CP009273.1	+	806978	807733	12.8233	2.78186	1.94778
gene-BW25113_0778	bioD	CP009273.1	+	807726	808403	17.3591	3.76587	2.63675
gene-BW25113_0779	uvrB	CP009273.1	+	808982	811003	192.077	41.669	29.1753
gene-BW25113_0780	ybhK	CP009273.1	-	811195	812103	244.45	53.0306	37.1305
gene-BW25113_0781	moaA	CP009273.1	+	812500	813489	1117.57	242.444	169.752
gene-BW25113_0782	moaB	CP009273.1	+	813511	814023	836.988	181.575	127.133
gene-BW25113_0783	moaC	CP009273.1	+	814026	814511	603.489	130.92	91.6664
gene-BW25113_0784	moaD	CP009273.1	+	814504	814749	418.675	90.8269	63.5942
gene-BW25113_0785	moaE	CP009273.1	+	814751	815203	396.728	86.0657	60.2606
gene-BW25113_0786	ybhL	CP009273.1	+	815340	816044	408.94	88.715	62.1155
gene-BW25113_0787	ybhM	CP009273.1	+	816249	816962	12.6218	2.73817	1.91718
gene-BW25113_0788	ybhN	CP009273.1	-	816998	817954	4.42069	0.959018	0.671475
gene-BW25113_0789	clsB	CP009273.1	-	817954	819195	5.04409	1.09426	0.766167
gene-BW25113_0790	ybhP	CP009273.1	-	819192	819953	5.73248	1.2436	0.870729
gene-BW25113_0791	ybhQ	CP009273.1	+	820086	820496	663.515	143.942	100.784
gene-BW25113_0792	ybhR	CP009273.1	-	820458	821564	43.0904	9.34798	6.54517
gene-BW25113_0793	ybhS	CP009273.1	-	821575	822708	23.9669	5.19935	3.64043
gene-BW25113_0794	ybhF	CP009273.1	-	822701	824437	66.6888	14.4674	10.1296
gene-BW25113_0795	ybhG	CP009273.1	-	824430	825428	3.47015	0.752809	0.527094
gene-BW25113_0796	ybiH	CP009273.1	-	825428	826099	369.787	80.221	56.1683
gene-BW25113_0797	rhlE	CP009273.1	+	826328	827692	321.073	69.6532	48.7691
gene-BW25113_0798	ybiA	CP009273.1	-	827924	828406	59.4555	12.8982	9.03092
gene-BW25113_0799	dinG	CP009273.1	+	828526	830676	125.399	27.204	19.0474
gene-BW25113_0800	ybiB	CP009273.1	+	830704	831666	231.034	50.1203	35.0927
gene-BW25113_0801	ybiC	CP009273.1	+	831807	832892	61.1252	13.2604	9.28455
gene-BW25113_0802	ybiJ	CP009273.1	-	833121	833381	85.567	18.5628	12.9971
gene-BW25113_0803	ybiI	CP009273.1	-	833646	833912	153.539	33.3086	23.3217
gene-BW25113_0804	ybiX	CP009273.1	-	833986	834663	334.591	72.5858	50.8224
gene-BW25113_0805	fiu	CP009273.1	-	834705	836987	653.592	141.789	99.2767
gene-BW25113_0806	mcbA	CP009273.1	-	837252	837512	18.6092	4.03705	2.82662
gene-BW25113_0807	rlmF	CP009273.1	+	837788	838714	134.265	29.1273	20.3941
gene-BW25113_0808	ybiO	CP009273.1	-	838711	840936	12.6069	2.73493	1.91491
gene-BW25113_0809	glnQ	CP009273.1	-	841197	841919	239.589	51.9762	36.3922
gene-BW25113_0810	glnP	CP009273.1	-	841916	842575	191.338	41.5086	29.063
gene-BW25113_0811	glnH	CP009273.1	-	842714	843460	484.926	105.199	73.6573
gene-BW25113_0812	dps	CP009273.1	-	843864	844367	448.919	97.3878	68.188
gene-BW25113_0813	rhtA	CP009273.1	-	844666	845553	72.5135	15.731	11.0144
gene-BW25113_0814	ompX	CP009273.1	+	845906	846421	18772.1	4072.4	2851.37
gene-BW25113_0815	ybiP	CP009273.1	-	846470	848053	58.221	12.6304	8.84341
gene-BW25113_0817	mntR	CP009273.1	+	848639	849106	287.258	62.3174	43.6328
gene-BW25113_0818	ybiR	CP009273.1	+	849103	850221	102.728	22.2858	15.6038
gene-BW25113_0819	ldtB	CP009273.1	-	850280	851200	426.54	92.5329	64.7888
gene-BW25113_0820	ybiT	CP009273.1	+	851419	853011	657.898	142.723	99.9306
gene-BW25113_0821	ybiU	CP009273.1	-	853252	854517	58.3262	12.6532	8.8594
gene-BW25113_0822	ybiV	CP009273.1	-	854669	855484	148.451	32.2047	22.5488
gene-BW25113_0823	ybiW	CP009273.1	-	855630	858062	10.3728	2.25026	1.57556
gene-BW25113_0824	ybiY	CP009273.1	-	858068	858967	20.8233	4.51738	3.16294
gene-BW25113_0825	fsaA	CP009273.1	+	859098	859760	125.676	27.2639	19.0894
gene-BW25113_0826	moeB	CP009273.1	-	859836	860585	0.524507	0.113786	0.079669
gene-BW25113_0827	moeA	CP009273.1	-	860585	861820	344.171	74.664	52.2775
gene-BW25113_0828	iaaA	CP009273.1	+	862024	862989	195.608	42.435	29.7117
gene-BW25113_0829	gsiA	CP009273.1	+	862976	864847	84.5178	18.3352	12.8377
gene-BW25113_0830	gsiB	CP009273.1	+	864867	866405	60.0838	13.0345	9.12636
gene-BW25113_0831	gsiC	CP009273.1	+	866423	867343	38.304	8.30962	5.81815
gene-BW25113_0832	gsiD	CP009273.1	+	867346	868257	21.5735	4.68012	3.27688
gene-BW25113_0833	yliE	CP009273.1	+	868435	870783	8.57386	1.86	1.30232
gene-BW25113_0834	yliF	CP009273.1	+	870791	872119	14.3604	3.11533	2.18126
gene-BW25113_0835	rimO	CP009273.1	-	872166	873491	266.987	57.9198	40.5537
gene-BW25113_0836	bssR	CP009273.1	+	873704	874087	172.081	37.331	26.138
gene-BW25113_0837	yliI	CP009273.1	+	874198	875313	18.0511	3.91597	2.74185
gene-BW25113_0838	gstB	CP009273.1	-	875310	875936	286.943	62.2489	43.5848
gene-BW25113_0839	dacC	CP009273.1	+	876183	877385	191.685	41.5839	29.1158
gene-BW25113_0840	deoR	CP009273.1	-	877432	878190	216.721	47.0151	32.9185
gene-BW25113_0841	ybjG	CP009273.1	-	878248	878844	124.541	27.0178	18.917
gene-BW25113_0842	mdfA	CP009273.1	+	879129	880361	113.798	24.6872	17.2852
gene-BW25113_0843	ybjH	CP009273.1	-	880402	880686	117.512	25.493	17.8494
gene-BW25113_0844	ybjI	CP009273.1	-	880772	881587	199.348	43.2464	30.2798
gene-BW25113_0845	ybjJ	CP009273.1	-	881587	882795	91.1115	19.7656	13.8393
gene-BW25113_0846	rcdA	CP009273.1	+	882879	883415	102.38	22.2102	15.5509
gene-BW25113_0847	ybjL	CP009273.1	-	883590	885275	78.551	17.0407	11.9314
gene-BW25113_0848	ybjM	CP009273.1	+	885545	885922	67.2434	14.5877	10.2139
gene-BW25113_0849	grxA	CP009273.1	-	885952	886209	162.151	35.1769	24.6298
gene-BW25113_0850	ybjC	CP009273.1	+	886369	886656	381.654	82.7956	57.971
gene-BW25113_0851	nfsA	CP009273.1	+	886640	887362	414.683	89.9607	62.9878
gene-BW25113_0852	rimK	CP009273.1	+	887423	888325	250.224	54.2832	38.0074
gene-BW25113_0853	ybjN	CP009273.1	+	888413	888889	458.371	99.4384	69.6238
gene-BW25113_0854	potF	CP009273.1	+	889240	890352	9.30368	2.01833	1.41317
gene-BW25113_0855	potG	CP009273.1	+	890447	891580	5.56173	1.20655	0.844792
gene-BW25113_0856	potH	CP009273.1	+	891590	892543	6.66352	1.44558	1.01215
gene-BW25113_0857	potI	CP009273.1	+	892540	893385	9.4279	2.04527	1.43204
gene-BW25113_0858	ybjO	CP009273.1	+	893445	893933	38.2679	8.30179	5.81266
gene-BW25113_0859	rlmC	CP009273.1	+	893974	895101	81.4734	17.6747	12.3753
gene-BW25113_0860	artJ	CP009273.1	-	895300	896031	57.8743	12.5552	8.79075
gene-BW25113_0861	artM	CP009273.1	-	896322	896990	122.821	26.6447	18.6558
gene-BW25113_0862	artQ	CP009273.1	-	896990	897706	113.495	24.6214	17.2391
gene-BW25113_0863	artI	CP009273.1	-	897713	898444	291.041	63.138	44.2073
gene-BW25113_0864	artP	CP009273.1	-	898462	899190	192.931	41.8543	29.3051
gene-BW25113_0865	ybjP	CP009273.1	-	899408	899923	73.8702	16.0253	11.2204
gene-BW25113_0866	ybjQ	CP009273.1	+	900049	900372	346.133	75.0896	52.5755
gene-BW25113_0867	amiD	CP009273.1	+	900369	901199	214.363	46.5035	32.5604
gene-BW25113_0868	ybjS	CP009273.1	-	901196	902209	118.361	25.677	17.9783
gene-BW25113_0869	ybjT	CP009273.1	-	902308	903738	122.225	26.5153	18.5652
gene-BW25113_0870	ltaE	CP009273.1	-	903749	904750	259.365	56.2663	39.396
gene-BW25113_0871	poxB	CP009273.1	-	904787	906505	12.6789	2.75054	1.92585
gene-BW25113_0872	hcr	CP009273.1	-	906638	907606	47.9814	10.409	7.28809
gene-BW25113_0873	hcp	CP009273.1	-	907618	909270	26.7786	5.80931	4.0675
gene-BW25113_0874	ybjE	CP009273.1	-	909414	910313	53.5956	11.6269	8.14084
gene-BW25113_0875	aqpZ	CP009273.1	-	910808	911503	33.9986	7.3756	5.16417
gene-BW25113_0876	ybjD	CP009273.1	+	911929	913587	141.254	30.6434	21.4556
gene-BW25113_0877	ybjX	CP009273.1	-	913584	914576	611.858	132.736	92.9375
gene-BW25113_0878	macA	CP009273.1	+	914691	915806	69.8051	15.1434	10.603
gene-BW25113_0879	macB	CP009273.1	+	915803	917749	69.2966	15.0331	10.5257
gene-BW25113_0880	cspD	CP009273.1	-	917822	918046	1641.59	356.124	249.347
gene-BW25113_0881	clpS	CP009273.1	+	918369	918689	763.296	165.588	115.94
gene-BW25113_0882	clpA	CP009273.1	+	918720	920996	1141.85	247.711	173.44
gene-BW25113_0883	serW	CP009273.1	-	921340	921427	39.2045	8.50498	5.95493
gene-BW25113_0884	infA	CP009273.1	-	921681	921899	4394.19	953.27	667.451
gene-BW25113_0885	aat	CP009273.1	-	922184	922888	106.238	23.0472	16.1369
gene-BW25113_0886	cydC	CP009273.1	-	922930	924651	167.971	36.4394	25.5138
gene-BW25113_0887	cydD	CP009273.1	-	924652	926418	172.589	37.4411	26.2151
gene-BW25113_0888	trxB	CP009273.1	-	926541	927506	1466.61	318.163	222.768
gene-BW25113_0889	lrp	CP009273.1	+	928051	928545	2112.99	458.388	320.95
gene-BW25113_0890	ftsK	CP009273.1	+	928680	932669	436.936	94.7884	66.368
gene-BW25113_0891	lolA	CP009273.1	+	932828	933439	684.614	148.519	103.989
gene-BW25113_0892	rarA	CP009273.1	+	933450	934793	245.778	53.3186	37.3321
gene-BW25113_0893	serS	CP009273.1	+	934884	936176	2507.75	544.029	380.913
gene-BW25113_0894	dmsA	CP009273.1	+	936415	938859	351.831	76.3258	53.4411
gene-BW25113_0895	dmsB	CP009273.1	+	938870	939487	57.6311	12.5024	8.75381
gene-BW25113_0896	dmsC	CP009273.1	+	939489	940352	27.7199	6.01352	4.21049
gene-BW25113_0897	ycaC	CP009273.1	-	940387	941013	6.27592	1.36149	0.953273
gene-BW25113_0898	ycaD	CP009273.1	+	941327	942475	27.805	6.03199	4.22342
gene-BW25113_0899	ycaM	CP009273.1	+	942685	944115	57.5982	12.4953	8.74881
gene-BW25113_0900	ycaN	CP009273.1	-	944116	945024	37.7316	8.18544	5.73119
gene-BW25113_0901	ycaK	CP009273.1	+	945124	945714	36.4112	7.89899	5.53063
gene-BW25113_0902	pflA	CP009273.1	-	945796	946536	387.522	84.0685	58.8623
gene-BW25113_0903	pflB	CP009273.1	-	946728	949010	5109.19	1108.38	776.055
gene-BW25113_0904	focA	CP009273.1	-	949065	949922	3797.14	823.746	576.762
gene-BW25113_0905	ycaO	CP009273.1	-	950328	952088	955.954	207.383	145.204
gene-BW25113_0906	ycaP	CP009273.1	+	952218	952910	14.7922	3.209	2.24685
gene-BW25113_0907	serC	CP009273.1	+	953109	954197	721.974	156.624	109.663
gene-BW25113_0908	aroA	CP009273.1	+	954268	955551	232.998	50.5462	35.3909
gene-BW25113_0909	ycaL	CP009273.1	+	955720	956484	23.6993	5.1413	3.59979
gene-BW25113_0910	cmk	CP009273.1	+	956657	957340	2003.6	434.658	304.334
gene-BW25113_0911	rpsA	CP009273.1	+	957451	959124	44055.1	9557.26	6691.7
gene-BW25113_0912	ihfB	CP009273.1	+	959284	959568	2632.46	571.082	399.855
gene-BW25113_0913	ycaI	CP009273.1	+	959776	962040	21.7377	4.71576	3.30183
gene-BW25113_0914	msbA	CP009273.1	+	962077	963825	696.258	151.045	105.757
gene-BW25113_0915	lpxK	CP009273.1	+	963822	964808	502.126	108.931	76.2699
gene-BW25113_0916	ycaQ	CP009273.1	+	964845	966077	54.9765	11.9265	8.35059
gene-BW25113_0917	ycaR	CP009273.1	+	966129	966311	1229.23	266.669	186.713
gene-BW25113_0918	kdsB	CP009273.1	+	966308	967054	1012.06	219.556	153.726
gene-BW25113_0919	ycbJ	CP009273.1	+	967208	968101	194.727	42.2437	29.5778
gene-BW25113_0920	ycbC	CP009273.1	-	968078	968857	48.7071	10.5664	7.39831
gene-BW25113_0921	smtA	CP009273.1	+	968993	969778	730.608	158.497	110.975
gene-BW25113_0922	mukF	CP009273.1	+	969775	971097	577.149	125.206	87.6654
gene-BW25113_0923	mukE	CP009273.1	+	971078	971782	38.1457	8.27529	5.79411
gene-BW25113_0924	mukB	CP009273.1	+	971782	976242	939.127	203.733	142.648
gene-BW25113_0925	ldtD	CP009273.1	+	976503	978350	156.733	34.0014	23.8067
gene-BW25113_0926	ycbK	CP009273.1	+	978531	979079	582.324	126.329	88.4515
gene-BW25113_0927	ycbL	CP009273.1	+	979106	979753	741.239	160.803	112.59
gene-BW25113_0928	aspC	CP009273.1	-	979975	981165	572.958	124.297	87.0288
gene-BW25113_0929	ompF	CP009273.1	-	981350	982438	20421.6	4430.23	3101.91
gene-BW25113_0930	asnS	CP009273.1	-	983041	984441	1425.57	309.262	216.536
gene-BW25113_0931	pncB	CP009273.1	-	984610	985812	553.565	120.09	84.0832
gene-BW25113_0932	pepN	CP009273.1	+	986078	988690	910.51	197.525	138.301
gene-BW25113_0933	ssuB	CP009273.1	-	988733	989500	26.2513	5.69492	3.98741
gene-BW25113_0934	ssuC	CP009273.1	-	989497	990288	4.47729	0.971298	0.680073
gene-BW25113_0935	ssuD	CP009273.1	-	990299	991444	3.49127	0.757392	0.530303
gene-BW25113_0936	ssuA	CP009273.1	-	991441	992400	2.47838	0.537657	0.376451
gene-BW25113_0937	ssuE	CP009273.1	-	992393	992968	9.63325	2.08982	1.46323
gene-BW25113_0938	elfA	CP009273.1	+	993324	993863	9.13518	1.98177	1.38758
gene-BW25113_0939	elfD	CP009273.1	+	993946	994647	5.23219	1.13506	0.794738
gene-BW25113_0940	elfC	CP009273.1	+	994672	997272	9.17801	1.99107	1.39408
gene-BW25113_0941	elfG	CP009273.1	+	997263	998333	21.3287	4.62701	3.23969
gene-BW25113_0942	ycbU	CP009273.1	+	998345	998887	12.4733	2.70594	1.89462
gene-BW25113_0943	ycbV	CP009273.1	+	998895	999410	9.02616	1.95812	1.37102
gene-BW25113_0944	ycbF	CP009273.1	+	999403	1000113	41.2876	8.95688	6.27134
gene-BW25113_0945	pyrD	CP009273.1	+	1000224	1001234	124.839	27.0824	18.9622
gene-BW25113_0946	zapC	CP009273.1	+	1001408	1001950	252.505	54.778	38.3539
gene-BW25113_0947	ycbX	CP009273.1	-	1001947	1003056	255.468	55.421	38.8041
gene-BW25113_0948	rlmL	CP009273.1	+	1003300	1005408	500.848	108.653	76.0757
gene-BW25113_0949	uup	CP009273.1	+	1005420	1007327	714.443	154.99	108.52
gene-BW25113_0950	pqiA	CP009273.1	+	1007457	1008710	176.446	38.2779	26.801
gene-BW25113_0951	pqiB	CP009273.1	+	1008715	1010355	275.227	59.7074	41.8053
gene-BW25113_0952	pqiC	CP009273.1	+	1010352	1010915	282.239	61.2284	42.8703
gene-BW25113_0953	rmf	CP009273.1	+	1011171	1011338	388.976	84.384	59.0831
gene-BW25113_0954	fabA	CP009273.1	-	1011408	1011926	12713.9	2758.13	1931.16
gene-BW25113_0955	ycbZ	CP009273.1	-	1011995	1013755	722.428	156.723	109.732
gene-BW25113_0956	matP	CP009273.1	+	1013941	1014393	367.391	79.7012	55.8044
gene-BW25113_0957	ompA	CP009273.1	-	1014469	1015509	41038.8	8902.89	6233.54
gene-BW25113_0958	sulA	CP009273.1	-	1015866	1016375	193.38	41.9517	29.3733
gene-BW25113_0959	sxy	CP009273.1	+	1016594	1017223	92.7175	20.114	14.0832
gene-BW25113_0960	yccS	CP009273.1	-	1017186	1019339	122.711	26.6207	18.639
gene-BW25113_0961	yccF	CP009273.1	-	1019358	1019804	175.119	37.99	26.5994
gene-BW25113_0962	helD	CP009273.1	+	1019927	1021981	144.36	31.3173	21.9274
gene-BW25113_0963	mgsA	CP009273.1	-	1022013	1022471	1340.89	290.891	203.673
gene-BW25113_0964	yccT	CP009273.1	-	1022567	1023229	10.8462	2.35295	1.64746
gene-BW25113_0965	yccU	CP009273.1	+	1023402	1023815	270.114	58.5981	41.0286
gene-BW25113_0966	hspQ	CP009273.1	-	1023860	1024177	1044.36	226.562	158.632
gene-BW25113_0967	rlmI	CP009273.1	-	1024235	1025425	412.236	89.4299	62.6161
gene-BW25113_0968	yccX	CP009273.1	+	1025520	1025798	80.0824	17.373	12.164
gene-BW25113_0969	tusE	CP009273.1	-	1025795	1026124	305.658	66.3089	46.4275
gene-BW25113_0970	yccA	CP009273.1	-	1026215	1026874	1083.61	235.077	164.594
gene-BW25113_0971	serT	CP009273.1	-	1027081	1027168	66.4205	14.4092	10.0889
gene-BW25113_0972	hyaA	CP009273.1	+	1027595	1028713	4.71761	1.02343	0.716575
gene-BW25113_0973	hyaB	CP009273.1	+	1028710	1030503	2.01282	0.436659	0.305735
gene-BW25113_0974	hyaC	CP009273.1	+	1030522	1031229	5.53249	1.20021	0.840351
gene-BW25113_0975	hyaD	CP009273.1	+	1031226	1031813	9.4136	2.04217	1.42987
gene-BW25113_0976	hyaE	CP009273.1	+	1031810	1032208	4.16492	0.903531	0.632625
gene-BW25113_0977	hyaF	CP009273.1	+	1032205	1033062	6.52681	1.41592	0.991382
gene-BW25113_0978	cbdA	CP009273.1	+	1033196	1034740	6.04466	1.31132	0.918147
gene-BW25113_0979	cbdB	CP009273.1	+	1034752	1035888	11.7344	2.54564	1.78238
gene-BW25113_0980	appA	CP009273.1	+	1036073	1037371	16.0023	3.47152	2.43065
gene-BW25113_0981	etk	CP009273.1	-	1037486	1039666	26.9046	5.83665	4.08665
gene-BW25113_0982	etp	CP009273.1	-	1039686	1040132	12.7171	2.75882	1.93164
gene-BW25113_0983	gfcE	CP009273.1	-	1040120	1041259	14.4522	3.13523	2.1952
gene-BW25113_0984	gfcD	CP009273.1	-	1041305	1043401	14.8086	3.21255	2.24933
gene-BW25113_0985	gfcC	CP009273.1	-	1043401	1044147	6.86345	1.48895	1.04252
gene-BW25113_0986	gfcB	CP009273.1	-	1044144	1044788	8.50077	1.84415	1.29122
gene-BW25113_0987	gfcA	CP009273.1	-	1044895	1045200	32.1601	6.97677	4.88493
gene-BW25113_0988	insB1	CP009273.1	+	1045483	1045986	237.532	51.5298	36.0796
gene-BW25113_0989	cspH	CP009273.1	-	1046419	1046631	23.4695	5.09144	3.56487
gene-BW25113_0990	cspG	CP009273.1	+	1046917	1047129	261.667	56.7656	39.7456
gene-BW25113_0991	ymcE	CP009273.1	+	1047303	1047533	210.332	45.629	31.9481
gene-BW25113_0992	yccM	CP009273.1	-	1047745	1048818	52.0382	11.2891	7.90428
gene-BW25113_0993	torS	CP009273.1	-	1048890	1051634	14.4911	3.14367	2.20111
gene-BW25113_0994	torT	CP009273.1	+	1051717	1052745	22.8639	4.96007	3.47289
gene-BW25113_0995	torR	CP009273.1	-	1052718	1053410	59.2381	12.851	8.9979
gene-BW25113_0996	torC	CP009273.1	+	1053540	1054712	2.99119	0.648906	0.454344
gene-BW25113_0997	torA	CP009273.1	+	1054712	1057258	8.39397	1.82098	1.27499
gene-BW25113_0998	torD	CP009273.1	+	1057255	1057854	31.761	6.89018	4.8243
gene-BW25113_0999	cbpM	CP009273.1	-	1058006	1058311	0.79358	0.172158	0.12054
gene-BW25113_1000	cbpA	CP009273.1	-	1058311	1059231	155.265	33.683	23.5838
gene-BW25113_1001	yccE	CP009273.1	+	1059492	1060748	3.51074	0.761615	0.53326
gene-BW25113_1002	agp	CP009273.1	+	1061041	1062282	171.577	37.2217	26.0615
gene-BW25113_1003	yccJ	CP009273.1	-	1062320	1062547	189.333	41.0737	28.7586
gene-BW25113_1004	wrbA	CP009273.1	-	1062568	1063164	233.811	50.7226	35.5144
gene-BW25113_1006	rutG	CP009273.1	-	1063967	1065295	9.48984	2.05871	1.44145
gene-BW25113_1007	rutF	CP009273.1	-	1065316	1065810	5.63434	1.22231	0.855822
gene-BW25113_1008	rutE	CP009273.1	-	1065821	1066411	4.67513	1.01422	0.710123
gene-BW25113_1009	rutD	CP009273.1	-	1066421	1067221	1.54122	0.334349	0.234101
gene-BW25113_1010	rutC	CP009273.1	-	1067229	1067615	0	0	0
gene-BW25113_1011	rutB	CP009273.1	-	1067627	1068319	6.54978	1.4209	0.994872
gene-BW25113_1012	rutA	CP009273.1	-	1068319	1069467	2.48651	0.53942	0.377686
gene-BW25113_1013	rutR	CP009273.1	+	1069698	1070336	105.203	22.8227	15.9798
gene-BW25113_1014	putA	CP009273.1	-	1070376	1074338	148.267	32.1649	22.5209
gene-BW25113_1015	putP	CP009273.1	+	1074761	1076269	213.524	46.3215	32.4329
gene-BW25113_1018	efeO	CP009273.1	+	1077699	1078826	380.182	82.4761	57.7473
gene-BW25113_1019	efeB	CP009273.1	+	1078832	1080103	269.71	58.5105	40.9673
gene-BW25113_1020	phoH	CP009273.1	+	1080448	1081512	25.0648	5.43752	3.80719
gene-BW25113_1021	pgaD	CP009273.1	-	1081562	1081975	14.029	3.04343	2.13092
gene-BW25113_1022	pgaC	CP009273.1	-	1081977	1083302	7.17766	1.55711	1.09024
gene-BW25113_1023	pgaB	CP009273.1	-	1083295	1085313	7.36573	1.59791	1.11881
gene-BW25113_1024	pgaA	CP009273.1	-	1085322	1087745	10.4592	2.26899	1.58868
gene-BW25113_1025	ycdT	CP009273.1	+	1088332	1089690	14.0346	3.04464	2.13177
gene-BW25113_1026	insF1	CP009273.1	-	1089731	1090597	35.8773	7.78316	5.44954
gene-BW25113_1027	insE1	CP009273.1	-	1090594	1090893	67.6106	14.6674	10.2696
gene-BW25113_1028	ymdE	CP009273.1	+	1090961	1091302	1.97661	0.428803	0.300235
gene-BW25113_1029	ycdU	CP009273.1	+	1091299	1092285	2.4306	0.527291	0.369193
gene-BW25113_1032	serX	CP009273.1	-	1093021	1093108	35.2614	7.64955	5.35599
gene-BW25113_1033	ghrA	CP009273.1	+	1093342	1094280	107.698	23.3638	16.3586
gene-BW25113_1034	ycdX	CP009273.1	+	1094335	1095072	298.339	64.7212	45.3158
gene-BW25113_1035	ycdY	CP009273.1	+	1095096	1095650	377.488	81.8918	57.3382
gene-BW25113_1036	ycdZ	CP009273.1	+	1095752	1096243	2099.97	455.565	318.973
gene-BW25113_1037	csgG	CP009273.1	-	1096307	1097140	44.6831	9.69349	6.78709
gene-BW25113_1038	csgF	CP009273.1	-	1097167	1097583	5.04077	1.09354	0.765662
gene-BW25113_1039	csgE	CP009273.1	-	1097608	1097997	5.29487	1.14866	0.804259
gene-BW25113_1040	csgD	CP009273.1	-	1098002	1098652	11.0092	2.38832	1.67223
gene-BW25113_1041	csgB	CP009273.1	+	1099407	1099862	4.28667	0.929943	0.651118
gene-BW25113_1042	csgA	CP009273.1	+	1099903	1100358	13.7632	2.98576	2.09054
gene-BW25113_1043	csgC	CP009273.1	+	1100417	1100749	8.83784	1.91727	1.34241
gene-BW25113_1044	ymdA	CP009273.1	+	1100870	1101181	37.9744	8.23811	5.76807
gene-BW25113_1045	ymdB	CP009273.1	+	1101276	1101809	82.1592	17.8235	12.4795
gene-BW25113_1046	clsC	CP009273.1	+	1101811	1103232	46.1231	10.0059	7.00581
gene-BW25113_1047	opgC	CP009273.1	-	1103240	1104397	47.329	10.2675	7.18899
gene-BW25113_1048	opgG	CP009273.1	+	1104791	1106326	786.729	170.672	119.499
gene-BW25113_1049	opgH	CP009273.1	+	1106319	1108862	595.857	129.264	90.507
gene-BW25113_1050	yceK	CP009273.1	+	1109035	1109262	74.5263	16.1676	11.3201
gene-BW25113_1051	msyB	CP009273.1	-	1109263	1109637	60.8907	13.2095	9.24892
gene-BW25113_1053	mdtG	CP009273.1	-	1109720	1110946	19.0269	4.12767	2.89007
gene-BW25113_1054	lpxL	CP009273.1	-	1111118	1112038	308.11	66.8409	46.8
gene-BW25113_1055	yceA	CP009273.1	+	1112263	1113315	122.476	26.5697	18.6033
gene-BW25113_1056	yceI	CP009273.1	-	1113357	1113932	101.766	22.0769	15.4576
gene-BW25113_1057	yceJ	CP009273.1	-	1113936	1114502	17.6173	3.82187	2.67596
gene-BW25113_1058	yceO	CP009273.1	-	1114763	1114903	5.32624	1.15547	0.809023
gene-BW25113_1059	solA	CP009273.1	-	1114924	1116042	282.589	61.3045	42.9235
gene-BW25113_1060	bssS	CP009273.1	-	1116157	1116411	1812.24	393.146	275.269
gene-BW25113_1061	dinI	CP009273.1	-	1116698	1116943	213.065	46.222	32.3633
gene-BW25113_1062	pyrC	CP009273.1	-	1117017	1118063	149.221	32.3717	22.6657
gene-BW25113_1063	yceB	CP009273.1	-	1118169	1118729	182.681	39.6305	27.7481
gene-BW25113_1064	grxB	CP009273.1	-	1118863	1119510	289.446	62.792	43.9651
gene-BW25113_1065	mdtH	CP009273.1	-	1119574	1120782	16.2357	3.52216	2.46611
gene-BW25113_1066	rimJ	CP009273.1	+	1121018	1121602	404.655	87.7852	61.4646
gene-BW25113_1067	yceH	CP009273.1	+	1121613	1122260	408.705	88.664	62.0798
gene-BW25113_1068	yceM	CP009273.1	+	1122262	1123185	210.042	45.5663	31.9041
gene-BW25113_1069	murJ	CP009273.1	+	1123295	1124830	89.666	19.452	13.6197
gene-BW25113_1070	flgN	CP009273.1	-	1124870	1125286	207.338	44.9796	31.4934
gene-BW25113_1071	flgM	CP009273.1	-	1125291	1125584	358.816	77.8411	54.502
gene-BW25113_1072	flgA	CP009273.1	-	1125660	1126319	409.211	88.7736	62.1566
gene-BW25113_1073	flgB	CP009273.1	+	1126474	1126890	957.247	207.664	145.4
gene-BW25113_1074	flgC	CP009273.1	+	1126894	1127298	937.464	203.372	142.395
gene-BW25113_1075	flgD	CP009273.1	+	1127310	1128005	900.734	195.404	136.816
gene-BW25113_1076	flgE	CP009273.1	+	1128030	1129238	750.077	162.721	113.932
gene-BW25113_1077	flgF	CP009273.1	+	1129258	1130013	487.888	105.842	74.1071
gene-BW25113_1078	flgG	CP009273.1	+	1130185	1130967	433.152	93.9674	65.7931
gene-BW25113_1079	flgH	CP009273.1	+	1131020	1131718	166.923	36.212	25.3545
gene-BW25113_1080	flgI	CP009273.1	+	1131730	1132827	125.035	27.1249	18.992
gene-BW25113_1081	flgJ	CP009273.1	+	1132827	1133768	108.725	23.5866	16.5146
gene-BW25113_1082	flgK	CP009273.1	+	1133834	1135477	100.361	21.7722	15.2443
gene-BW25113_1083	flgL	CP009273.1	+	1135489	1136442	119.058	25.8282	18.0841
gene-BW25113_1084	rne	CP009273.1	-	1136638	1139823	1577.39	342.196	239.596
gene-BW25113_1085	yceQ	CP009273.1	+	1139958	1140278	924.352	200.528	140.403
gene-BW25113_1086	rluC	CP009273.1	+	1140396	1141355	586.31	127.193	89.057
gene-BW25113_1087	yceF	CP009273.1	-	1141467	1142051	147.156	31.9237	22.352
gene-BW25113_1088	yceD	CP009273.1	+	1142250	1142771	23701.3	5141.74	3600.09
gene-BW25113_1089	rpmF	CP009273.1	+	1142823	1142996	41208	8939.61	6259.24
gene-BW25113_1090	plsX	CP009273.1	+	1143077	1144147	1807.17	392.044	274.497
gene-BW25113_1091	fabH	CP009273.1	+	1144215	1145168	3000.75	650.978	455.796
gene-BW25113_1092	fabD	CP009273.1	+	1145184	1146113	5198.01	1127.65	789.546
gene-BW25113_1093	fabG	CP009273.1	+	1146126	1146860	13344.4	2894.91	2026.93
gene-BW25113_1094	acpP	CP009273.1	+	1147071	1147307	49624.1	10765.4	7537.59
gene-BW25113_1095	fabF	CP009273.1	+	1147395	1148636	7170.15	1555.48	1089.1
gene-BW25113_1096	pabC	CP009273.1	+	1148756	1149565	118.925	25.7994	18.0639
gene-BW25113_1097	yceG	CP009273.1	+	1149568	1150590	114.472	24.8333	17.3876
gene-BW25113_1098	tmk	CP009273.1	+	1150580	1151221	297.558	64.5517	45.1972
gene-BW25113_1099	holB	CP009273.1	+	1151218	1152222	201.969	43.8148	30.6778
gene-BW25113_1100	ycfH	CP009273.1	+	1152233	1153030	311.406	67.556	47.3007
gene-BW25113_1101	ptsG	CP009273.1	+	1153325	1154758	4354.13	944.579	661.365
gene-BW25113_1102	fhuE	CP009273.1	-	1154818	1157007	67.0169	14.5386	10.1795
gene-BW25113_1103	hinT	CP009273.1	+	1157341	1157700	926.972	201.096	140.801
gene-BW25113_1104	ycfL	CP009273.1	+	1157703	1158080	785.619	170.431	119.331
gene-BW25113_1105	lpoB	CP009273.1	+	1158094	1158735	521.435	113.119	79.2027
gene-BW25113_1106	thiK	CP009273.1	+	1158716	1159540	203.966	44.2481	30.9812
gene-BW25113_1107	nagZ	CP009273.1	+	1159551	1160576	451.886	98.0315	68.6387
gene-BW25113_1108	ycfP	CP009273.1	+	1160599	1161141	1063.85	230.791	161.593
gene-BW25113_1109	ndh	CP009273.1	+	1161541	1162845	2072.49	449.604	314.799
gene-BW25113_1110	ycfJ	CP009273.1	+	1163055	1163594	187.774	40.7355	28.5217
gene-BW25113_1111	ycfQ	CP009273.1	-	1163656	1164288	160.174	34.7479	24.3294
gene-BW25113_1112	bhsA	CP009273.1	+	1164529	1164786	38.5078	8.35382	5.84909
gene-BW25113_1113	ldtC	CP009273.1	-	1164868	1165830	34.3489	7.45161	5.21739
gene-BW25113_1114	mfd	CP009273.1	-	1165974	1169420	238.688	51.7806	36.2552
gene-BW25113_1115	ycfT	CP009273.1	-	1169548	1170621	6.39479	1.38728	0.971329
gene-BW25113_1116	lolC	CP009273.1	+	1170883	1172082	281.104	60.9824	42.698
gene-BW25113_1117	lolD	CP009273.1	+	1172075	1172776	20.5504	4.45817	3.12148
gene-BW25113_1118	lolE	CP009273.1	+	1172776	1174020	404.981	87.856	61.5141
gene-BW25113_1119	nagK	CP009273.1	+	1174049	1174960	377.798	81.959	57.3852
gene-BW25113_1120	cobB	CP009273.1	+	1175087	1175815	312.653	67.8265	47.4901
gene-BW25113_1121	ycfZ	CP009273.1	-	1175935	1176723	26.8812	5.83157	4.08309
gene-BW25113_1122	ymfA	CP009273.1	-	1176720	1177181	56.3111	12.2161	8.55332
gene-BW25113_1123	potD	CP009273.1	-	1177239	1178285	1667.04	361.644	253.212
gene-BW25113_1124	potC	CP009273.1	-	1178282	1179076	783.039	169.871	118.939
gene-BW25113_1125	potB	CP009273.1	-	1179073	1179900	603.809	130.99	91.7149
gene-BW25113_1126	potA	CP009273.1	-	1179914	1181050	643.293	139.555	97.7122
gene-BW25113_1127	pepT	CP009273.1	+	1181300	1182526	541.552	117.484	82.2584
gene-BW25113_1128	roxA	CP009273.1	-	1182575	1183696	572.7	124.241	86.9896
gene-BW25113_1129	phoQ	CP009273.1	-	1183772	1185232	0.550252	0.119371	0.08358
gene-BW25113_1130	phoP	CP009273.1	-	1185232	1185903	727.18	157.753	110.454
gene-BW25113_1131	purB	CP009273.1	-	1186072	1187442	559.097	121.29	84.9234
gene-BW25113_1132	hflD	CP009273.1	-	1187446	1188087	344.698	74.7783	52.3575
gene-BW25113_1133	mnmA	CP009273.1	-	1188123	1189229	559.25	121.323	84.9467
gene-BW25113_1134	nudJ	CP009273.1	-	1189283	1189744	194.091	42.1058	29.4812
gene-BW25113_1135	rluE	CP009273.1	-	1189754	1190407	142.25	30.8596	21.607
gene-BW25113_1136	icd	CP009273.1	+	1190579	1191829	3127.17	678.404	474.998
gene-BW25113_1137	ymfD	CP009273.1	-	1192323	1192988	28.3453	6.1492	4.30548
gene-BW25113_1138	ymfE	CP009273.1	-	1192989	1193693	23.3007	5.05482	3.53924
gene-BW25113_1139	lit	CP009273.1	+	1194151	1195044	20.7864	4.50936	3.15732
gene-BW25113_1140	intE	CP009273.1	-	1195135	1196262	20.7862	4.50933	3.1573
gene-BW25113_1141	xisE	CP009273.1	-	1196243	1196488	14.2568	3.09284	2.16551
gene-BW25113_1143	ymfI	CP009273.1	+	1196953	1197294	119.673	25.9616	18.1775
gene-BW25113_1144	ymfJ	CP009273.1	-	1197232	1197540	44.0032	9.546	6.68382
gene-BW25113_1145	cohE	CP009273.1	-	1197715	1198389	232.852	50.5146	35.3688
gene-BW25113_1146	croE	CP009273.1	+	1198480	1198680	6.74627	1.46353	1.02472
gene-BW25113_1147	ymfL	CP009273.1	+	1198724	1199281	17.5675	3.81107	2.66839
gene-BW25113_1148	ymfM	CP009273.1	+	1199278	1199616	6.70012	1.45351	1.01771
gene-BW25113_1150	ymfR	CP009273.1	+	1201005	1201187	1.7308	0.375478	0.262898
gene-BW25113_1151	beeE	CP009273.1	+	1201187	1201598	3.75971	0.815626	0.571077
gene-BW25113_1152	jayE	CP009273.1	+	1201599	1202378	3.49646	0.758517	0.531091
gene-BW25113_1153	ymfQ	CP009273.1	+	1202369	1202953	1.58592	0.344047	0.240891
gene-BW25113_1154	stfP	CP009273.1	+	1202957	1203586	2.12222	0.460392	0.322353
gene-BW25113_1155	tfaP	CP009273.1	+	1203588	1204001	2.12802	0.46165	0.323233
gene-BW25113_1156	tfaE	CP009273.1	-	1203973	1204575	4.22482	0.916526	0.641724
gene-BW25113_1157	stfE	CP009273.1	-	1204575	1205075	1.60282	0.347714	0.243459
gene-BW25113_1158	pinE	CP009273.1	+	1205141	1205695	0.990991	0.214984	0.150525
gene-BW25113_1159	mcrA	CP009273.1	+	1205802	1206635	87.8729	19.063	13.3474
gene-BW25113_1160	iraM	CP009273.1	-	1207136	1207459	9.16667	1.9886	1.39236
gene-BW25113_1161	ycgX	CP009273.1	-	1208159	1208563	18.242	3.95739	2.77084
gene-BW25113_1162	bluR	CP009273.1	-	1208784	1209515	311.43	67.5613	47.3044
gene-BW25113_1163	bluF	CP009273.1	-	1209720	1210931	56.3911	12.2334	8.56546
gene-BW25113_1164	ycgZ	CP009273.1	+	1211245	1211481	11.0844	2.40463	1.68365
gene-BW25113_1165	ymgA	CP009273.1	+	1211524	1211796	7.28205	1.57976	1.1061
gene-BW25113_1166	ariR	CP009273.1	+	1211825	1212091	4.69161	1.01779	0.712626
gene-BW25113_1167	ymgC	CP009273.1	+	1212204	1212452	0.795181	0.172505	0.120783
gene-BW25113_1168	ycgG	CP009273.1	+	1212784	1214307	2.89436	0.627898	0.439635
gene-BW25113_1171	ymgD	CP009273.1	-	1217761	1218090	43.6242	9.46378	6.62625
gene-BW25113_1172	ymgG	CP009273.1	-	1218100	1218444	33.9015	7.35453	5.14942
gene-BW25113_1174	minE	CP009273.1	-	1219735	1220001	2050.9	444.918	311.518
gene-BW25113_1175	minD	CP009273.1	-	1220005	1220817	2271.82	492.845	345.075
gene-BW25113_1176	minC	CP009273.1	-	1220841	1221536	1376.78	298.676	209.124
gene-BW25113_1177	ycgJ	CP009273.1	+	1222056	1222424	166.726	36.1694	25.3247
gene-BW25113_1178	pliG	CP009273.1	-	1222527	1222928	88.4229	19.1823	13.4309
gene-BW25113_1179	ycgL	CP009273.1	+	1223170	1223463	470.82	102.139	71.5146
gene-BW25113_1180	ycgM	CP009273.1	+	1223535	1224194	311.589	67.5958	47.3285
gene-BW25113_1181	ycgN	CP009273.1	+	1224271	1224732	173.714	37.6853	26.3861
gene-BW25113_1182	hlyE	CP009273.1	-	1224939	1225850	3.13597	0.680312	0.476334
gene-BW25113_1183	umuD	CP009273.1	+	1226223	1226642	0.852534	0.184948	0.129495
gene-BW25113_1184	umuC	CP009273.1	+	1226642	1227910	15.5916	3.38242	2.36827
gene-BW25113_1185	dsbB	CP009273.1	-	1227956	1228486	500.989	108.684	76.0971
gene-BW25113_1186	nhaB	CP009273.1	-	1228632	1230173	441.665	95.8141	67.0862
gene-BW25113_1187	fadR	CP009273.1	+	1230394	1231113	782.604	169.777	118.873
gene-BW25113_1188	ycgB	CP009273.1	-	1231165	1232697	13.5884	2.94785	2.06399
gene-BW25113_1189	dadA	CP009273.1	+	1233027	1234325	489.413	106.173	74.3388
gene-BW25113_1190	dadX	CP009273.1	+	1234335	1235405	348.869	75.6832	52.9911
gene-BW25113_1191	cvrA	CP009273.1	-	1235791	1237527	119.872	26.0048	18.2078
gene-BW25113_1192	ldcA	CP009273.1	-	1237622	1238536	92.9672	20.1682	14.1212
gene-BW25113_1193	emtA	CP009273.1	+	1238636	1239247	268.683	58.2877	40.8113
gene-BW25113_1194	ycgR	CP009273.1	-	1239249	1239983	16.1864	3.51145	2.45861
gene-BW25113_1195	ymgE	CP009273.1	+	1240184	1240438	5.39216	1.16977	0.819036
gene-BW25113_1196	ycgY	CP009273.1	+	1240616	1241056	6.94331	1.50627	1.05465
gene-BW25113_1197	treA	CP009273.1	-	1241135	1242832	22.0442	4.78223	3.34837
gene-BW25113_1198	dhaM	CP009273.1	-	1243152	1244570	1727.49	374.76	262.396
gene-BW25113_1199	dhaL	CP009273.1	-	1244581	1245213	1768.37	383.628	268.605
gene-BW25113_1200	dhaK	CP009273.1	-	1245224	1246294	2210.4	479.52	335.746
gene-BW25113_1201	dhaR	CP009273.1	+	1246522	1248441	95.4625	20.7095	14.5002
gene-BW25113_1202	ycgV	CP009273.1	-	1248541	1251408	20.8912	4.53211	3.17325
gene-BW25113_1203	ychF	CP009273.1	-	1252177	1253268	1102.99	239.282	167.538
gene-BW25113_1204	pth	CP009273.1	-	1253385	1253969	287.032	62.2684	43.5985
gene-BW25113_1205	ychH	CP009273.1	+	1254247	1254525	1778.67	385.862	270.169
gene-BW25113_1206	dauA	CP009273.1	-	1254580	1256259	149.212	32.3698	22.6644
gene-BW25113_1207	prs	CP009273.1	-	1256384	1257331	2381.02	516.535	361.662
gene-BW25113_1208	ispE	CP009273.1	-	1257482	1258333	727.149	157.747	110.45
gene-BW25113_1209	lolB	CP009273.1	-	1258333	1258956	271.324	58.8607	41.2125
gene-BW25113_1210	hemA	CP009273.1	+	1259170	1260426	284.692	61.7607	43.243
gene-BW25113_1211	prfA	CP009273.1	+	1260468	1261550	338.963	73.5342	51.4864
gene-BW25113_1212	prmC	CP009273.1	+	1261550	1262383	185.85	40.3179	28.2294
gene-BW25113_1213	ychQ	CP009273.1	+	1262380	1262772	176.485	38.2863	26.8069
gene-BW25113_1214	ychA	CP009273.1	+	1262776	1263585	538.375	116.794	81.7759
gene-BW25113_1215	kdsA	CP009273.1	+	1263621	1264475	1054.11	228.678	160.113
gene-BW25113_1216	chaA	CP009273.1	-	1266205	1267305	238.731	51.79	36.2618
gene-BW25113_1217	chaB	CP009273.1	+	1267575	1267805	25.4849	5.52865	3.87099
gene-BW25113_1218	chaC	CP009273.1	+	1267963	1268658	73.3665	15.916	11.1439
gene-BW25113_1219	ychN	CP009273.1	-	1268702	1269055	516.438	112.035	78.4437
gene-BW25113_1220	ychO	CP009273.1	+	1269240	1270634	60.843	13.1992	9.24168
gene-BW25113_1221	narL	CP009273.1	-	1270635	1271285	228.175	49.4999	34.6584
gene-BW25113_1222	narX	CP009273.1	-	1271278	1273074	122.473	26.5691	18.6029
gene-BW25113_1223	narK	CP009273.1	+	1273413	1274804	726.901	157.693	110.412
gene-BW25113_1224	narG	CP009273.1	+	1275320	1279063	654.965	142.087	99.4851
gene-BW25113_1225	narH	CP009273.1	+	1279060	1280598	37.9377	8.23015	5.7625
gene-BW25113_1226	narJ	CP009273.1	+	1280595	1281305	14.1748	3.07506	2.15306
gene-BW25113_1227	narI	CP009273.1	+	1281305	1281982	13.2357	2.87134	2.01042
gene-BW25113_1229	tpr	CP009273.1	-	1282543	1282632	0.613746	0.133145	0.093224
gene-BW25113_1230	tyrV	CP009273.1	-	1282700	1282784	975.741	211.676	148.209
gene-BW25113_1231	tyrT	CP009273.1	-	1282994	1283078	1154.52	250.459	175.364
gene-BW25113_1232	purU	CP009273.1	-	1283238	1284080	444.753	96.4842	67.5553
gene-BW25113_1233	ychJ	CP009273.1	-	1284130	1284588	470.715	102.116	71.4987
gene-BW25113_1234	rssA	CP009273.1	+	1284701	1285606	232.755	50.4935	35.3541
gene-BW25113_1235	rssB	CP009273.1	+	1285698	1286711	144.585	31.366	21.9615
gene-BW25113_1236	galU	CP009273.1	+	1286913	1287821	1819.58	394.736	276.383
gene-BW25113_1237	hns	CP009273.1	-	1287965	1288378	18238.6	3956.65	2770.33
gene-BW25113_1238	tdk	CP009273.1	+	1288983	1289600	220.07	47.7416	33.4272
gene-BW25113_1241	adhE	CP009273.1	-	1290902	1293577	2690.01	583.568	408.597
gene-BW25113_1242	ychE	CP009273.1	+	1294054	1294701	96.8627	21.0133	14.7128
gene-BW25113_1243	oppA	CP009273.1	+	1295439	1297070	2396.85	519.97	364.068
gene-BW25113_1244	oppB	CP009273.1	+	1297156	1298076	967.885	209.972	147.016
gene-BW25113_1245	oppC	CP009273.1	+	1298091	1298999	1233.06	267.499	187.295
gene-BW25113_1246	oppD	CP009273.1	+	1299011	1300024	2231.39	484.075	338.935
gene-BW25113_1247	oppF	CP009273.1	+	1300021	1301025	2267.17	491.836	344.369
gene-BW25113_1248	yciU	CP009273.1	-	1301078	1301407	473.507	102.722	71.9228
gene-BW25113_1249	clsA	CP009273.1	-	1301442	1302902	306.561	66.5048	46.5647
gene-BW25113_1250	kch	CP009273.1	-	1303273	1304526	72.3222	15.6895	10.9853
gene-BW25113_1251	yciI	CP009273.1	-	1304826	1305122	680.232	147.569	103.323
gene-BW25113_1252	tonB	CP009273.1	+	1305346	1306065	574.026	124.528	87.1911
gene-BW25113_1253	yciA	CP009273.1	-	1306105	1306503	284.737	61.7704	43.2498
gene-BW25113_1254	yciB	CP009273.1	-	1306608	1307147	349.744	75.8731	53.124
gene-BW25113_1255	yciC	CP009273.1	-	1307177	1307920	267.824	58.1013	40.6808
gene-BW25113_1256	ompW	CP009273.1	+	1308277	1308915	471.099	102.199	71.557
gene-BW25113_1257	yciE	CP009273.1	-	1308975	1309481	41.4694	8.99632	6.29895
gene-BW25113_1258	yciF	CP009273.1	-	1309527	1310027	6.52957	1.41652	0.991802
gene-BW25113_1259	yciG	CP009273.1	-	1310113	1310292	2.50556	0.543552	0.380579
gene-BW25113_1260	trpA	CP009273.1	-	1310673	1311479	0.907356	0.196841	0.137822
gene-BW25113_1261	trpB	CP009273.1	-	1311479	1312672	187.046	40.5775	28.4111
gene-BW25113_1262	trpC	CP009273.1	-	1312684	1314045	101.018	21.9146	15.344
gene-BW25113_1263	trpD	CP009273.1	-	1314046	1315641	25.2585	5.47954	3.83661
gene-BW25113_1264	trpE	CP009273.1	-	1315641	1317203	13.6891	2.96969	2.07929
gene-BW25113_1265	trpL	CP009273.1	-	1317295	1317339	6.31111	1.36912	0.958619
gene-BW25113_1266	yciV	CP009273.1	+	1317477	1318358	193.137	41.8988	29.3363
gene-BW25113_1267	yciO	CP009273.1	+	1318355	1318975	450.638	97.7608	68.4492
gene-BW25113_1268	yciQ	CP009273.1	+	1319003	1320898	46.6319	10.1163	7.08309
gene-BW25113_1269	rluB	CP009273.1	+	1321109	1321984	1291.51	280.178	196.172
gene-BW25113_1270	btuR	CP009273.1	-	1322024	1322614	193.425	41.9613	29.3801
gene-BW25113_1271	yciK	CP009273.1	-	1322611	1323369	207.789	45.0775	31.5619
gene-BW25113_1272	sohB	CP009273.1	+	1323589	1324638	510.38	110.721	77.5236
gene-BW25113_1273	yciN	CP009273.1	-	1324674	1324925	1115.72	242.042	169.471
gene-BW25113_1274	topA	CP009273.1	+	1325305	1327902	2115.86	459.012	321.386
gene-BW25113_1275	cysB	CP009273.1	+	1328112	1329086	412.832	89.5592	62.7066
gene-BW25113_1276	acnA	CP009273.1	+	1330088	1332763	101.022	21.9155	15.3446
gene-BW25113_1277	ribA	CP009273.1	-	1332827	1333417	650.411	141.099	98.7935
gene-BW25113_1278	pgpB	CP009273.1	+	1333587	1334351	140.724	30.5285	21.3751
gene-BW25113_1279	yciS	CP009273.1	+	1334500	1334808	464.515	100.771	70.5569
gene-BW25113_1280	yciM	CP009273.1	+	1334815	1335984	221.273	48.0026	33.61
gene-BW25113_1281	pyrF	CP009273.1	+	1336178	1336915	261.294	56.6848	39.689
gene-BW25113_1282	yciH	CP009273.1	+	1336915	1337241	243.636	52.854	37.0068
gene-BW25113_1283	osmB	CP009273.1	-	1337367	1337585	41.7489	9.05694	6.3414
gene-BW25113_1284	yciT	CP009273.1	-	1337854	1338603	247.667	53.7285	37.6191
gene-BW25113_1285	gmr	CP009273.1	-	1339014	1340999	41.9079	9.09143	6.36555
gene-BW25113_1286	rnb	CP009273.1	-	1341235	1343169	774.057	167.923	117.575
gene-BW25113_1287	yciW	CP009273.1	-	1343237	1344364	29.6019	6.42181	4.49636
gene-BW25113_1288	fabI	CP009273.1	-	1344508	1345296	3519.67	763.553	534.617
gene-BW25113_1289	ycjD	CP009273.1	-	1345664	1346017	31.0734	6.74103	4.71987
gene-BW25113_1290	sapF	CP009273.1	-	1346085	1346891	142.292	30.8687	21.6134
gene-BW25113_1291	sapD	CP009273.1	-	1346893	1347885	206.224	44.7378	31.3241
gene-BW25113_1292	sapC	CP009273.1	-	1347885	1348775	91.9959	19.9575	13.9736
gene-BW25113_1293	sapB	CP009273.1	-	1348762	1349727	121.195	26.2919	18.4088
gene-BW25113_1294	sapA	CP009273.1	-	1349724	1351367	135.518	29.399	20.5843
gene-BW25113_1295	ymjA	CP009273.1	-	1351680	1351925	171.687	37.2455	26.0782
gene-BW25113_1296	puuP	CP009273.1	-	1352059	1353444	9.17027	1.98939	1.39291
gene-BW25113_1297	puuA	CP009273.1	-	1353747	1355165	12.9873	2.81745	1.97269
gene-BW25113_1298	puuD	CP009273.1	+	1355377	1356141	31.2026	6.76905	4.73949
gene-BW25113_1299	puuR	CP009273.1	+	1356168	1356725	91.2437	19.7943	13.8594
gene-BW25113_1300	puuC	CP009273.1	+	1357000	1358487	6.18683	1.34216	0.939741
gene-BW25113_1301	puuB	CP009273.1	+	1358489	1359769	4.11553	0.892818	0.625125
gene-BW25113_1302	puuE	CP009273.1	+	1359807	1361072	9.906	2.149	1.50466
gene-BW25113_1303	pspF	CP009273.1	-	1361192	1362169	110.753	24.0265	16.8226
gene-BW25113_1304	pspA	CP009273.1	+	1362336	1363004	228.149	49.4944	34.6545
gene-BW25113_1305	pspB	CP009273.1	+	1363058	1363282	0.877996	0.190471	0.133362
gene-BW25113_1306	pspC	CP009273.1	+	1363282	1363641	102.263	22.1849	15.5332
gene-BW25113_1307	pspD	CP009273.1	+	1363650	1363871	64.3333	13.9564	9.77184
gene-BW25113_1308	pspE	CP009273.1	+	1363946	1364260	576.787	125.127	87.6105
gene-BW25113_1309	ycjM	CP009273.1	+	1364473	1366152	30.2	6.55155	4.58719
gene-BW25113_1310	ycjN	CP009273.1	+	1366166	1367458	21.877	4.74597	3.32299
gene-BW25113_1311	ycjO	CP009273.1	+	1367479	1368360	12.9072	2.80006	1.96052
gene-BW25113_1312	ycjP	CP009273.1	+	1368347	1369189	13.2288	2.86984	2.00937
gene-BW25113_1313	ycjQ	CP009273.1	+	1369220	1370272	23.246	5.04295	3.53092
gene-BW25113_1314	ycjR	CP009273.1	+	1370291	1371079	22.6375	4.91095	3.4385
gene-BW25113_1315	ycjS	CP009273.1	+	1371089	1372144	17.2253	3.73683	2.61642
gene-BW25113_1316	ycjT	CP009273.1	+	1372141	1374408	14.0196	3.0414	2.12949
gene-BW25113_1317	ycjU	CP009273.1	+	1374405	1375064	8.70393	1.88822	1.32207
gene-BW25113_1319	ompG	CP009273.1	+	1376204	1377109	4.90508	1.0641	0.745051
gene-BW25113_1320	ycjW	CP009273.1	-	1377220	1378218	42.4575	9.21066	6.44903
gene-BW25113_1321	ycjX	CP009273.1	+	1378374	1379771	118.605	25.73	18.0153
gene-BW25113_1322	ycjF	CP009273.1	+	1379768	1380829	113.617	24.648	17.2578
gene-BW25113_1323	tyrR	CP009273.1	+	1380977	1382518	542.296	117.645	82.3715
gene-BW25113_1324	tpx	CP009273.1	-	1382562	1383068	4746.22	1029.64	720.922
gene-BW25113_1325	ycjG	CP009273.1	+	1383187	1384152	128.942	27.9725	19.5855
gene-BW25113_1326	mpaA	CP009273.1	-	1384127	1384855	160.675	34.8566	24.4055
gene-BW25113_1327	ycjY	CP009273.1	-	1385190	1386110	16.0436	3.48047	2.43692
gene-BW25113_1328	pgrR	CP009273.1	+	1386248	1387147	43.2956	9.39248	6.57633
gene-BW25113_1329	mppA	CP009273.1	+	1387484	1389097	394.274	85.5334	59.8879
gene-BW25113_1330	ynaI	CP009273.1	-	1389148	1390179	61.1105	13.2572	9.28231
gene-BW25113_1331	insH1	CP009273.1	+	1390333	1391349	405.173	87.8977	61.5433
gene-BW25113_1332	ynaJ	CP009273.1	+	1391622	1391879	631.612	137.021	95.9381
gene-BW25113_1333	uspE	CP009273.1	-	1391929	1392879	975.174	211.553	148.123
gene-BW25113_1334	fnr	CP009273.1	-	1393031	1393783	1447.67	314.055	219.892
gene-BW25113_1335	ogt	CP009273.1	-	1393978	1394493	152.31	33.0419	23.135
gene-BW25113_1336	abgT	CP009273.1	-	1394504	1396030	10.0452	2.17919	1.5258
gene-BW25113_1337	abgB	CP009273.1	-	1396067	1397512	15.3688	3.33409	2.33443
gene-BW25113_1338	abgA	CP009273.1	-	1397512	1398822	9.41421	2.0423	1.42996
gene-BW25113_1339	abgR	CP009273.1	+	1398998	1399906	75.0506	16.2814	11.3997
gene-BW25113_1340	smrA	CP009273.1	+	1400236	1400799	67.2305	14.5849	10.2119
gene-BW25113_1341	ydaM	CP009273.1	-	1400820	1402052	18.442	4.00078	2.80123
gene-BW25113_1342	ydaN	CP009273.1	+	1402307	1403290	128.667	27.9128	19.5437
gene-BW25113_1343	dbpA	CP009273.1	+	1403768	1405141	114.656	24.8733	17.4155
gene-BW25113_1344	ttcA	CP009273.1	-	1405270	1406205	556.892	120.811	84.5885
gene-BW25113_1345	intR	CP009273.1	-	1406257	1407492	47.8843	10.388	7.27333
gene-BW25113_1346	ydaQ	CP009273.1	-	1407494	1407709	3.8287	0.830594	0.581557
gene-BW25113_1347	rcbA	CP009273.1	-	1407788	1407997	5.56667	1.20762	0.845543
gene-BW25113_1348	ralR	CP009273.1	-	1407990	1408184	4.73333	1.02684	0.718964
gene-BW25113_1349	recT	CP009273.1	-	1408241	1409050	12.9309	2.8052	1.96412
gene-BW25113_1350	recE	CP009273.1	-	1409043	1411643	7.72588	1.67604	1.17351
gene-BW25113_1351	racC	CP009273.1	-	1411745	1412020	3.52174	0.764001	0.534931
gene-BW25113_1352	kilR	CP009273.1	-	1412265	1412486	4.03232	0.874767	0.612485
gene-BW25113_1353	sieB	CP009273.1	+	1412928	1413416	2.80164	0.607783	0.425551
gene-BW25113_1355	ydaG	CP009273.1	-	1413579	1413713	12.6519	2.74467	1.92174
gene-BW25113_1356	racR	CP009273.1	-	1414022	1414498	520.841	112.99	79.1125
gene-BW25113_1357	ydaS	CP009273.1	+	1414622	1414918	14.3771	3.11895	2.18379
gene-BW25113_1358	ydaT	CP009273.1	+	1414941	1415363	9.00473	1.95347	1.36776
gene-BW25113_1359	ydaU	CP009273.1	+	1415376	1416233	8.82168	1.91376	1.33996
gene-BW25113_1360	ydaV	CP009273.1	+	1416240	1416986	4.72423	1.02487	0.717582
gene-BW25113_1361	ydaW	CP009273.1	+	1416958	1417457	9.362	2.03098	1.42203
gene-BW25113_1362	rzpR	CP009273.1	+	1417458	1417901	6.03112	1.30838	0.916091
gene-BW25113_1363	trkG	CP009273.1	+	1418039	1419496	22.2812	4.83365	3.38438
gene-BW25113_1365	ynaK	CP009273.1	+	1419634	1419897	9.7001	2.10433	1.47339
gene-BW25113_1366	ydaY	CP009273.1	+	1419887	1420339	10.3492	2.24513	1.57197
gene-BW25113_1368	tmpR	CP009273.1	+	1420711	1421643	9.78457	2.12265	1.48622
gene-BW25113_1370	insH1	CP009273.1	-	1422003	1422983	27.7063	6.01058	4.20842
gene-BW25113_1372	stfR	CP009273.1	+	1423306	1426668	6.54147	1.4191	0.993609
gene-BW25113_1373	tfaR	CP009273.1	+	1426668	1427243	8.11025	1.75943	1.2319
gene-BW25113_1374	pinR	CP009273.1	-	1427341	1427931	19.1523	4.15487	2.90911
gene-BW25113_1375	ynaE	CP009273.1	-	1428248	1428481	14.0171	3.04085	2.12911
gene-BW25113_1376	uspF	CP009273.1	-	1429442	1429876	415.869	90.218	63.1679
gene-BW25113_1377	ompN	CP009273.1	-	1430017	1431150	4.14966	0.90022	0.630307
gene-BW25113_1378	pfo	CP009273.1	-	1431517	1435041	211.074	45.7901	32.0608
gene-BW25113_1379	hslJ	CP009273.1	-	1435578	1436000	349.752	75.8747	53.1251
gene-BW25113_1380	ldhA	CP009273.1	-	1436111	1437100	555.349	120.477	84.354
gene-BW25113_1381	ydbH	CP009273.1	+	1437308	1439947	65.81	14.2767	9.99613
gene-BW25113_1382	ynbE	CP009273.1	+	1439944	1440129	97.8099	21.2188	14.8567
gene-BW25113_1383	ydbL	CP009273.1	+	1440137	1440463	112.639	24.4358	17.1092
gene-BW25113_1384	feaR	CP009273.1	-	1440635	1441540	27.1236	5.88416	4.11991
gene-BW25113_1385	feaB	CP009273.1	+	1441776	1443275	22.0413	4.78162	3.34794
gene-BW25113_1386	tynA	CP009273.1	-	1443333	1445606	7.92744	1.71977	1.20413
gene-BW25113_1387	paaZ	CP009273.1	-	1445854	1447899	3.71066	0.804984	0.563626
gene-BW25113_1388	paaA	CP009273.1	+	1448184	1449113	5.92043	1.28437	0.899277
gene-BW25113_1389	paaB	CP009273.1	+	1449125	1449412	9.41667	2.04284	1.43033
gene-BW25113_1390	paaC	CP009273.1	+	1449421	1450167	6.52075	1.4146	0.990462
gene-BW25113_1391	paaD	CP009273.1	+	1450182	1450679	7.63855	1.6571	1.16025
gene-BW25113_1392	paaE	CP009273.1	+	1450687	1451757	7.09617	1.53943	1.07787
gene-BW25113_1393	paaF	CP009273.1	+	1451754	1452521	0.893947	0.193932	0.135785
gene-BW25113_1394	paaG	CP009273.1	+	1452521	1453309	6.66824	1.4466	1.01286
gene-BW25113_1395	paaH	CP009273.1	+	1453311	1454738	9.67542	2.09897	1.46964
gene-BW25113_1396	paaI	CP009273.1	+	1454728	1455150	1.51581	0.328838	0.230242
gene-BW25113_1397	paaJ	CP009273.1	+	1455150	1456355	16.5078	3.58117	2.50743
gene-BW25113_1398	paaK	CP009273.1	+	1456382	1457695	20.8714	4.52781	3.17024
gene-BW25113_1399	paaX	CP009273.1	+	1457796	1458746	112.818	24.4747	17.1364
gene-BW25113_1400	paaY	CP009273.1	+	1458728	1459318	127.497	27.659	19.366
gene-BW25113_1402	insD1	CP009273.1	-	1462178	1463083	72.9871	15.8337	11.0863
gene-BW25113_1403	insC1	CP009273.1	-	1463041	1463406	159.785	34.6636	24.2704
gene-BW25113_1404	insI1	CP009273.1	+	1463615	1464766	108.422	23.5209	16.4687
gene-BW25113_1406	ydbC	CP009273.1	+	1468478	1469338	63.1905	13.7085	9.59825
gene-BW25113_1407	ydbD	CP009273.1	+	1469401	1471707	4.80841	1.04313	0.730368
gene-BW25113_1408	ynbA	CP009273.1	+	1471878	1472483	1.27912	0.27749	0.19429
gene-BW25113_1409	ynbB	CP009273.1	+	1472483	1473379	1.22809	0.266419	0.186539
gene-BW25113_1410	ynbC	CP009273.1	+	1473395	1475152	7.2446	1.57163	1.10041
gene-BW25113_1411	ynbD	CP009273.1	+	1475166	1476458	13.9985	3.03681	2.12628
gene-BW25113_1412	azoR	CP009273.1	-	1476512	1477117	155.744	33.7869	23.6566
gene-BW25113_1413	hrpA	CP009273.1	+	1477318	1481220	276.274	59.9345	41.9643
gene-BW25113_1414	ydcF	CP009273.1	+	1481492	1482292	97.206	21.0877	14.765
gene-BW25113_1415	aldA	CP009273.1	+	1482489	1483928	501.997	108.903	76.2503
gene-BW25113_1418	cybB	CP009273.1	+	1485159	1485689	613.677	133.13	93.2138
gene-BW25113_1419	ydcA	CP009273.1	+	1485934	1486107	230.109	49.9196	34.9522
gene-BW25113_1420	mokB	CP009273.1	-	1486219	1486386	48.0576	10.4255	7.29965
gene-BW25113_1421	trg	CP009273.1	+	1486727	1488367	15.7623	3.41946	2.3942
gene-BW25113_1422	ydcI	CP009273.1	-	1488405	1489328	75.7413	16.4312	11.5046
gene-BW25113_1423	ydcJ	CP009273.1	+	1489545	1490888	8.70015	1.8874	1.3215
gene-BW25113_1424	opgD	CP009273.1	+	1491113	1492768	222.784	48.3305	33.8396
gene-BW25113_1426	ydcH	CP009273.1	+	1492908	1493132	519.071	112.607	78.8437
gene-BW25113_1427	rimL	CP009273.1	+	1493195	1493734	156.113	33.8669	23.7126
gene-BW25113_1428	ydcK	CP009273.1	-	1493726	1494706	23.7197	5.14571	3.60287
gene-BW25113_1429	tehA	CP009273.1	+	1494830	1495822	58.8746	12.7722	8.94269
gene-BW25113_1430	tehB	CP009273.1	+	1495819	1496412	216.902	47.0543	32.946
gene-BW25113_1431	ydcL	CP009273.1	+	1496714	1497382	151.746	32.9195	23.0493
gene-BW25113_1432	insQ	CP009273.1	+	1497974	1499122	130.855	28.3874	19.876
gene-BW25113_1433	ydcO	CP009273.1	-	1499162	1500337	21.9337	4.75826	3.33159
gene-BW25113_1434	ydcN	CP009273.1	+	1500429	1500965	67.8864	14.7272	10.3115
gene-BW25113_1435	ydcP	CP009273.1	+	1501038	1502999	166.616	36.1455	25.308
gene-BW25113_1436	yncJ	CP009273.1	-	1503091	1503321	37.8528	8.21174	5.74961
gene-BW25113_1438	hicB	CP009273.1	+	1503765	1504181	59.5324	12.9149	9.0426
gene-BW25113_1439	ydcR	CP009273.1	+	1504260	1505666	46.1606	10.014	7.01152
gene-BW25113_1440	ydcS	CP009273.1	+	1505911	1507056	12.4197	2.69432	1.88648
gene-BW25113_1441	ydcT	CP009273.1	+	1507074	1508087	7.33235	1.59067	1.11374
gene-BW25113_1442	ydcU	CP009273.1	+	1508088	1509029	7.94533	1.72365	1.20685
gene-BW25113_1443	ydcV	CP009273.1	+	1509019	1509813	9.57925	2.07811	1.45503
gene-BW25113_1444	patD	CP009273.1	+	1509835	1511259	22.7172	4.92824	3.4506
gene-BW25113_1445	ydcX	CP009273.1	+	1511646	1511819	41.7759	9.0628	6.3455
gene-BW25113_1446	ydcY	CP009273.1	+	1511905	1512138	809.769	175.67	122.999
gene-BW25113_1447	ydcZ	CP009273.1	-	1512139	1512588	117.137	25.4114	17.7923
gene-BW25113_1448	mnaT	CP009273.1	-	1512585	1513103	159.348	34.5687	24.204
gene-BW25113_1449	curA	CP009273.1	+	1513284	1514321	42.1204	9.13755	6.39783
gene-BW25113_1450	mcbR	CP009273.1	+	1514519	1515184	16.4895	3.57721	2.50465
gene-BW25113_1451	yncD	CP009273.1	-	1515220	1517322	117.424	25.4738	17.836
gene-BW25113_1452	yncE	CP009273.1	+	1517564	1518625	664.368	144.127	100.913
gene-BW25113_1453	ansP	CP009273.1	-	1518738	1520237	83.5787	18.1314	12.6951
gene-BW25113_1454	yncG	CP009273.1	+	1520504	1521121	3.00162	0.651167	0.455927
gene-BW25113_1455	yncH	CP009273.1	+	1521197	1521409	0	0	0
gene-BW25113_1456	rhsE	CP009273.1	+	1522159	1524195	2.78259	0.60365	0.422658
gene-BW25113_1457	ydcD	CP009273.1	+	1524179	1524661	6.7337	1.4608	1.02281
gene-BW25113_1459	yncI	CP009273.1	+	1524843	1525896	4.20477	0.912177	0.638679
gene-BW25113_1460	ydcC	CP009273.1	+	1526073	1527209	3.21651	0.697784	0.488567
gene-BW25113_1461	pptA	CP009273.1	+	1527309	1527542	86.1667	18.6929	13.0882
gene-BW25113_1462	yddH	CP009273.1	-	1527539	1528108	32.6737	7.08818	4.96293
gene-BW25113_1463	nhoA	CP009273.1	+	1528281	1529126	31.9835	6.93845	4.85809
gene-BW25113_1464	yddE	CP009273.1	-	1529222	1530115	119.635	25.9535	18.1719
gene-BW25113_1465	narV	CP009273.1	-	1530194	1530874	6.78414	1.47174	1.03047
gene-BW25113_1466	narW	CP009273.1	-	1530871	1531566	0.560263	0.121543	0.085101
gene-BW25113_1467	narY	CP009273.1	-	1531566	1533110	5.28354	1.1462	0.802537
gene-BW25113_1468	narZ	CP009273.1	-	1533107	1536847	6.09473	1.32218	0.925751
gene-BW25113_1469	narU	CP009273.1	-	1536929	1538317	4.10655	0.89087	0.62376
gene-BW25113_1471	yddK	CP009273.1	-	1538641	1539971	0.323065	0.070085	0.049072
gene-BW25113_1472	yddL	CP009273.1	-	1540007	1540285	1.1828	0.256594	0.179659
gene-BW25113_1473	yddG	CP009273.1	-	1540545	1541426	52.39	11.3654	7.95772
gene-BW25113_1474	fdnG	CP009273.1	+	1541658	1544705	212.018	45.995	32.2043
gene-BW25113_1475	fdnH	CP009273.1	+	1544718	1545602	91.1464	19.7732	13.8446
gene-BW25113_1476	fdnI	CP009273.1	+	1545595	1546248	74.0725	16.0692	11.2512
gene-BW25113_1477	yddM	CP009273.1	-	1546655	1546939	337.053	73.1197	51.1962
gene-BW25113_1478	adhP	CP009273.1	-	1547085	1548095	148.958	32.3148	22.6259
gene-BW25113_1479	maeA	CP009273.1	-	1548229	1549926	1118.6	242.667	169.908
gene-BW25113_1480	sra	CP009273.1	-	1550083	1550220	247.594	53.7127	37.608
gene-BW25113_1481	bdm	CP009273.1	-	1550322	1550537	3.03241	0.657846	0.460604
gene-BW25113_1482	osmC	CP009273.1	+	1550882	1551313	106.447	23.0924	16.1686
gene-BW25113_1483	ddpF	CP009273.1	-	1551369	1552295	13.045	2.82996	1.98145
gene-BW25113_1484	ddpD	CP009273.1	-	1552288	1553274	9.06328	1.96618	1.37666
gene-BW25113_1485	ddpC	CP009273.1	-	1553271	1554167	9.89222	2.14601	1.50257
gene-BW25113_1486	ddpB	CP009273.1	-	1554164	1555186	4.16669	0.903915	0.632894
gene-BW25113_1487	ddpA	CP009273.1	-	1555188	1556738	4.23017	0.917688	0.642538
gene-BW25113_1488	ddpX	CP009273.1	-	1556752	1557333	3.48282	0.755558	0.529019
gene-BW25113_1489	dosP	CP009273.1	-	1557591	1559990	11.2279	2.43577	1.70545
gene-BW25113_1490	dosC	CP009273.1	-	1560015	1561397	14.9219	3.23714	2.26655
gene-BW25113_1491	yddW	CP009273.1	-	1561761	1563080	58.5553	12.7029	8.89419
gene-BW25113_1492	gadC	CP009273.1	-	1563211	1564746	7.73047	1.67704	1.17421
gene-BW25113_1493	gadB	CP009273.1	-	1564902	1566302	7.22056	1.56642	1.09676
gene-BW25113_1494	pqqL	CP009273.1	-	1566664	1569459	15.2979	3.31871	2.32366
gene-BW25113_1495	yddB	CP009273.1	-	1569504	1571876	12.5428	2.72101	1.90517
gene-BW25113_1496	yddA	CP009273.1	-	1571914	1573599	7.36062	1.5968	1.11803
gene-BW25113_1497	ydeM	CP009273.1	-	1573890	1575047	5.41364	1.17443	0.822299
gene-BW25113_1498	ydeN	CP009273.1	-	1575099	1576781	37.467	8.12804	5.69101
gene-BW25113_1499	ydeO	CP009273.1	-	1577183	1577944	1.18766	0.25765	0.180399
gene-BW25113_1500	safA	CP009273.1	-	1578019	1578216	0.921251	0.199855	0.139932
gene-BW25113_1501	ydeP	CP009273.1	-	1578464	1580743	6.07588	1.31809	0.922889
gene-BW25113_1502	ydeQ	CP009273.1	-	1581077	1581991	1.74754	0.379109	0.265441
gene-BW25113_1503	ydeR	CP009273.1	-	1582050	1582553	0	0	0
gene-BW25113_1504	ydeS	CP009273.1	-	1582566	1583096	2.38795	0.518038	0.362715
gene-BW25113_1505	ydeT	CP009273.1	-	1583110	1584336	1.13284	0.245758	0.172072
gene-BW25113_1506	yneL	CP009273.1	-	1584591	1584793	3.31034	0.718142	0.502821
gene-BW25113_1507	hipA	CP009273.1	-	1585111	1586433	125.628	27.2535	19.082
gene-BW25113_1508	hipB	CP009273.1	-	1586433	1586699	236.845	51.3808	35.9753
gene-BW25113_1511	lsrK	CP009273.1	-	1592874	1594466	16.8964	3.66549	2.56646
gene-BW25113_1512	lsrR	CP009273.1	-	1594545	1595498	71.5954	15.5318	10.8749
gene-BW25113_1513	lsrA	CP009273.1	+	1595747	1597282	5.09115	1.10447	0.773314
gene-BW25113_1514	lsrC	CP009273.1	+	1597276	1598304	4.43802	0.962778	0.674108
gene-BW25113_1515	lsrD	CP009273.1	+	1598304	1599296	3.40487	0.738649	0.51718
gene-BW25113_1516	lsrB	CP009273.1	+	1599308	1600330	6.3539	1.37841	0.965119
gene-BW25113_1517	lsrF	CP009273.1	+	1600357	1601232	6.90297	1.49752	1.04852
gene-BW25113_1518	lsrG	CP009273.1	+	1601256	1601546	11.646	2.52648	1.76896
gene-BW25113_1519	tam	CP009273.1	+	1601603	1602361	16.892	3.66452	2.56579
gene-BW25113_1520	yneE	CP009273.1	-	1602365	1603279	14.7552	3.20097	2.24122
gene-BW25113_1521	uxaB	CP009273.1	-	1603486	1604937	90.7961	19.6972	13.7914
gene-BW25113_1522	yneF	CP009273.1	-	1605164	1606111	38.8175	8.42102	5.89614
gene-BW25113_1523	yneG	CP009273.1	-	1606223	1606582	0.930088	0.201772	0.141275
gene-BW25113_1524	glsB	CP009273.1	-	1606582	1607508	117.321	25.4515	17.8204
gene-BW25113_1525	sad	CP009273.1	-	1607572	1608960	30.995	6.724	4.70794
gene-BW25113_1526	yneJ	CP009273.1	+	1609061	1609942	34.7449	7.53751	5.27754
gene-BW25113_1527	yneK	CP009273.1	+	1610020	1611135	2.19982	0.477226	0.334139
gene-BW25113_1528	ydeA	CP009273.1	+	1611285	1612475	26.1203	5.66651	3.96752
gene-BW25113_1529	marC	CP009273.1	-	1612500	1613165	118.357	25.6763	17.9778
gene-BW25113_1530	marR	CP009273.1	+	1613377	1613811	89.0506	19.3185	13.5262
gene-BW25113_1531	marA	CP009273.1	+	1613831	1614214	197.286	42.799	29.9666
gene-BW25113_1532	marB	CP009273.1	+	1614246	1614464	123.005	26.6844	18.6836
gene-BW25113_1533	eamA	CP009273.1	-	1614495	1615394	52.7767	11.4493	8.01645
gene-BW25113_1534	ydeE	CP009273.1	+	1615589	1616776	44.0817	9.56301	6.69573
gene-BW25113_1535	dgcZ	CP009273.1	-	1617217	1618107	46.9607	10.1876	7.13305
gene-BW25113_1536	ydeI	CP009273.1	-	1618362	1618754	4.94148	1.072	0.75058
gene-BW25113_1537	ydeJ	CP009273.1	+	1619030	1619548	14.0308	3.04383	2.1312
gene-BW25113_1538	dcp	CP009273.1	-	1619592	1621637	124.1	26.922	18.85
gene-BW25113_1539	ydfG	CP009273.1	+	1621774	1622520	883.07	191.572	134.133
gene-BW25113_1540	rspR	CP009273.1	+	1622609	1623295	291.156	63.1629	44.2248
gene-BW25113_1541	ydfZ	CP009273.1	+	1623472	1623675	124.044	26.91	18.8415
gene-BW25113_1542	ydfI	CP009273.1	-	1623710	1625170	15.1431	3.28511	2.30014
gene-BW25113_1544	ydfK	CP009273.1	+	1627329	1627562	15.3504	3.3301	2.33164
gene-BW25113_1545	pinQ	CP009273.1	+	1627879	1628469	21.6091	4.68786	3.28229
gene-BW25113_1546	tfaQ	CP009273.1	-	1628567	1629142	8.51393	1.847	1.29321
gene-BW25113_1547	stfQ	CP009273.1	-	1629142	1630104	5.14245	1.1156	0.781107
gene-BW25113_1548	nohQ	CP009273.1	-	1630097	1630624	5.83028	1.26481	0.885584
gene-BW25113_1549	ydfO	CP009273.1	+	1631304	1631714	8.42336	1.82735	1.27946
gene-BW25113_1550	gnsB	CP009273.1	-	1631866	1632039	152.879	33.1654	23.2214
gene-BW25113_1551	ynfN	CP009273.1	-	1632211	1632366	1.48718	0.322627	0.225894
gene-BW25113_1552	cspI	CP009273.1	-	1632712	1632924	15.5305	3.36917	2.35899
gene-BW25113_1553	rzpQ	CP009273.1	-	1633287	1633784	1.04291	0.226247	0.158411
gene-BW25113_1554	rrrQ	CP009273.1	-	1633781	1634314	0.610529	0.132447	0.092736
gene-BW25113_1555	ydfR	CP009273.1	-	1634311	1634622	9.47756	2.05605	1.43958
gene-BW25113_1556	essQ	CP009273.1	-	1634627	1634842	5.22685	1.13391	0.793927
gene-BW25113_1557	cspB	CP009273.1	-	1635596	1635811	124.153	26.9335	18.858
gene-BW25113_1558	cspF	CP009273.1	+	1636112	1636324	93.8732	20.3647	14.2588
gene-BW25113_1559	quuQ	CP009273.1	-	1636746	1637498	14.6255	3.17284	2.22152
gene-BW25113_1560	ydfU	CP009273.1	-	1637512	1638561	4.32095	0.937381	0.656326
gene-BW25113_1561	rem	CP009273.1	-	1638908	1639159	18.0794	3.92211	2.74614
gene-BW25113_1562	hokD	CP009273.1	-	1639376	1639531	272.897	59.202	41.4515
gene-BW25113_1563	relE	CP009273.1	-	1639603	1639890	353.659	76.7222	53.7186
gene-BW25113_1564	relB	CP009273.1	-	1639890	1640129	331.635	71.9445	50.3734
gene-BW25113_1565	ydfV	CP009273.1	+	1640154	1640459	24.4869	5.31216	3.71941
gene-BW25113_1566	flxA	CP009273.1	+	1640662	1640994	10.9129	2.36743	1.6576
gene-BW25113_1567	intK	CP009273.1	-	1641431	1641613	18.6667	4.04952	2.83535
gene-BW25113_1568	ydfX	CP009273.1	-	1641615	1641893	21.4337	4.6498	3.25565
gene-BW25113_1569	dicC	CP009273.1	-	1641877	1642107	6.7013	1.45377	1.01789
gene-BW25113_1570	dicA	CP009273.1	+	1642191	1642598	319.277	69.2635	48.4962
gene-BW25113_1571	ydfA	CP009273.1	+	1642765	1642920	19.609	4.25394	2.97848
gene-BW25113_1572	ydfB	CP009273.1	+	1642922	1643050	10.8295	2.34933	1.64493
gene-BW25113_1573	ydfC	CP009273.1	+	1643080	1643298	25.5982	5.55323	3.88821
gene-BW25113_1574	dicF	CP009273.1	+	1643639	1643691	2.01887	0.43797	0.306654
gene-BW25113_1575	dicB	CP009273.1	+	1643866	1644054	0.534392	0.11593	0.081171
gene-BW25113_1576	ydfD	CP009273.1	+	1644051	1644242	1.82621	0.396176	0.27739
gene-BW25113_1577	ydfE	CP009273.1	+	1644335	1645099	5.10196	1.10681	0.774957
gene-BW25113_1578	insD1	CP009273.1	+	1645102	1645794	39.3189	8.52979	5.9723
gene-BW25113_1579	intQ	CP009273.1	+	1645808	1646965	5.18048	1.12385	0.786884
gene-BW25113_1580	rspB	CP009273.1	-	1647153	1648172	6.22504	1.35045	0.945545
gene-BW25113_1581	rspA	CP009273.1	-	1648184	1649398	8.13004	1.76372	1.2349
gene-BW25113_1582	ynfA	CP009273.1	-	1649604	1649930	48.4648	10.5139	7.36151
gene-BW25113_1583	ynfB	CP009273.1	+	1650065	1650406	623.193	135.195	94.6592
gene-BW25113_1584	speG	CP009273.1	+	1650441	1651001	474.382	102.912	72.0556
gene-BW25113_1585	ynfC	CP009273.1	-	1651004	1651714	107.875	23.4022	16.3855
gene-BW25113_1586	ynfD	CP009273.1	+	1651822	1652127	52.7876	11.4517	8.01811
gene-BW25113_1587	ynfE	CP009273.1	+	1652326	1654752	27.1529	5.89051	4.12435
gene-BW25113_1588	ynfF	CP009273.1	+	1654813	1657236	13.2327	2.87068	2.00996
gene-BW25113_1589	ynfG	CP009273.1	+	1657247	1657864	9.6877	2.10164	1.4715
gene-BW25113_1590	ynfH	CP009273.1	+	1657866	1658720	52.5345	11.3968	7.97967
gene-BW25113_1591	dmsD	CP009273.1	+	1658763	1659377	201.405	43.6925	30.5922
gene-BW25113_1592	clcB	CP009273.1	+	1659572	1660828	24.315	5.27487	3.69331
gene-BW25113_1593	ynfK	CP009273.1	-	1660781	1661476	866.191	187.91	131.569
gene-BW25113_1594	mlc	CP009273.1	-	1661601	1662821	581.75	126.204	88.3643
gene-BW25113_1595	ynfL	CP009273.1	-	1662956	1663849	22.4206	4.86389	3.40555
gene-BW25113_1596	ynfM	CP009273.1	+	1663956	1665209	19.5104	4.23255	2.96351
gene-BW25113_1597	asr	CP009273.1	+	1665633	1665941	6.77023	1.46872	1.02836
gene-BW25113_1598	ydgD	CP009273.1	+	1666217	1667038	130.387	28.2861	19.8051
gene-BW25113_1599	mdtI	CP009273.1	-	1667077	1667406	31.2739	6.78452	4.75032
gene-BW25113_1600	mdtJ	CP009273.1	-	1667393	1667758	29.5529	6.41118	4.48891
gene-BW25113_1601	tqsA	CP009273.1	+	1668170	1669204	33.1072	7.18224	5.02879
gene-BW25113_1602	pntB	CP009273.1	-	1669229	1670617	596.467	129.397	90.5997
gene-BW25113_1603	pntA	CP009273.1	-	1670628	1672160	722.886	156.822	109.802
gene-BW25113_1604	ydgH	CP009273.1	+	1672684	1673628	852.756	184.996	129.528
gene-BW25113_1605	ydgI	CP009273.1	+	1673814	1675196	56.6594	12.2916	8.60622
gene-BW25113_1606	folM	CP009273.1	+	1675233	1675955	95.971	20.8198	14.5774
gene-BW25113_1607	ydgC	CP009273.1	-	1675952	1676287	57.4911	12.472	8.73254
gene-BW25113_1608	rstA	CP009273.1	+	1676416	1677135	375.76	81.5168	57.0756
gene-BW25113_1609	rstB	CP009273.1	+	1677139	1678440	139.297	30.219	21.1584
gene-BW25113_1610	tus	CP009273.1	+	1678516	1679445	85.7151	18.5949	13.0196
gene-BW25113_1611	fumC	CP009273.1	-	1679442	1680845	84.4708	18.325	12.8306
gene-BW25113_1612	fumA	CP009273.1	-	1680988	1682634	769.297	166.89	116.852
gene-BW25113_1613	manA	CP009273.1	+	1682833	1684008	430.344	93.3581	65.3666
gene-BW25113_1614	ydgA	CP009273.1	+	1684109	1685617	842.041	182.671	127.901
gene-BW25113_1615	uidC	CP009273.1	-	1685843	1687108	4.52923	0.982564	0.687962
gene-BW25113_1616	uidB	CP009273.1	-	1687147	1688520	8.99199	1.95071	1.36583
gene-BW25113_1617	uidA	CP009273.1	-	1688517	1690328	22.1887	4.81359	3.37033
gene-BW25113_1618	uidR	CP009273.1	-	1690719	1691309	435.87	94.557	66.2059
gene-BW25113_1619	hdhA	CP009273.1	-	1691530	1692297	97.7331	21.2021	14.8451
gene-BW25113_1620	malI	CP009273.1	-	1692409	1693437	162.986	35.358	24.7566
gene-BW25113_1621	malX	CP009273.1	+	1693612	1695204	95.3296	20.6807	14.48
gene-BW25113_1622	malY	CP009273.1	+	1695214	1696386	157.209	34.1047	23.8791
gene-BW25113_1623	add	CP009273.1	+	1696490	1697491	360.373	78.1789	54.7385
gene-BW25113_1624	ydgJ	CP009273.1	-	1697525	1698565	210.903	45.753	32.0349
gene-BW25113_1625	cnu	CP009273.1	+	1699206	1699421	139.347	30.2298	21.166
gene-BW25113_1626	ydgK	CP009273.1	+	1699507	1699947	158.034	34.2837	24.0044
gene-BW25113_1627	rsxA	CP009273.1	+	1700024	1700605	86.2957	18.7209	13.1078
gene-BW25113_1628	rsxB	CP009273.1	+	1700605	1701183	142.069	30.8202	21.5794
gene-BW25113_1629	rsxC	CP009273.1	+	1701176	1703398	176.106	38.2041	26.7494
gene-BW25113_1630	rsxD	CP009273.1	+	1703399	1704457	251.455	54.5503	38.1945
gene-BW25113_1631	rsxG	CP009273.1	+	1704461	1705081	317.424	68.8614	48.2147
gene-BW25113_1632	rsxE	CP009273.1	+	1705085	1705780	1.20079	0.260497	0.182392
gene-BW25113_1633	nth	CP009273.1	+	1705780	1706415	315.571	68.4595	47.9333
gene-BW25113_1634	dtpA	CP009273.1	+	1707026	1708528	1745.62	378.692	265.149
gene-BW25113_1635	gstA	CP009273.1	+	1708634	1709239	143.073	31.0381	21.732
gene-BW25113_1636	pdxY	CP009273.1	-	1709283	1710146	485.454	105.314	73.7375
gene-BW25113_1637	tyrS	CP009273.1	-	1710205	1711479	1550.38	336.337	235.493
gene-BW25113_1638	pdxH	CP009273.1	-	1711608	1712264	336.852	73.0763	51.1658
gene-BW25113_1639	mliC	CP009273.1	-	1712323	1712652	41.5909	9.02267	6.3174
gene-BW25113_1640	anmK	CP009273.1	-	1712750	1713859	90.3964	19.6105	13.7307
gene-BW25113_1641	slyB	CP009273.1	+	1714133	1714600	4818.3	1045.28	731.871
gene-BW25113_1642	slyA	CP009273.1	-	1714647	1715081	1008.31	218.742	153.157
gene-BW25113_1643	ydhI	CP009273.1	+	1715282	1715518	62.3122	13.5179	9.46485
gene-BW25113_1644	ydhJ	CP009273.1	+	1715521	1716378	1.02059	0.221405	0.155021
gene-BW25113_1645	ydhK	CP009273.1	+	1716378	1718390	25.0473	5.43373	3.80453
gene-BW25113_1646	sodC	CP009273.1	-	1718391	1718912	155.262	33.6824	23.5834
gene-BW25113_1647	ydhF	CP009273.1	-	1718993	1719889	412.101	89.4007	62.5957
gene-BW25113_1648	ydhL	CP009273.1	-	1719938	1720177	32.8625	7.12914	4.99161
gene-BW25113_1649	nemR	CP009273.1	+	1720280	1720879	46.32	10.0486	7.03573
gene-BW25113_1650	nemA	CP009273.1	+	1720916	1722013	217.757	47.2399	33.0759
gene-BW25113_1651	gloA	CP009273.1	+	1722094	1722501	796.066	172.698	120.918
gene-BW25113_1652	rnt	CP009273.1	+	1722604	1723251	190.022	41.223	28.8631
gene-BW25113_1653	lhr	CP009273.1	+	1723344	1727960	37.9331	8.22915	5.7618
gene-BW25113_1654	grxD	CP009273.1	-	1728011	1728358	1983.36	430.267	301.26
gene-BW25113_1655	mepH	CP009273.1	+	1728692	1729507	177.273	38.4574	26.9267
gene-BW25113_1656	sodB	CP009273.1	+	1729635	1730216	3099.16	672.328	470.744
gene-BW25113_1657	ydhP	CP009273.1	-	1730378	1731547	35.5222	7.70614	5.39561
gene-BW25113_1658	purR	CP009273.1	+	1732101	1733126	564.326	122.424	85.7176
gene-BW25113_1659	ydhB	CP009273.1	-	1733123	1734055	53.1426	11.5287	8.07203
gene-BW25113_1660	ydhC	CP009273.1	+	1734168	1735379	88.5231	19.2041	13.4461
gene-BW25113_1661	cfa	CP009273.1	+	1735670	1736818	180.316	39.1175	27.3889
gene-BW25113_1662	ribC	CP009273.1	-	1736858	1737499	697.843	151.389	105.998
gene-BW25113_1663	mdtK	CP009273.1	+	1737714	1739087	125.365	27.1965	19.0422
gene-BW25113_1664	ydhQ	CP009273.1	-	1739128	1740384	540.309	117.214	82.0697
gene-BW25113_1665	valV	CP009273.1	+	1740692	1740768	157.792	34.2312	23.9677
gene-BW25113_1666	valW	CP009273.1	+	1740773	1740849	159.039	34.5017	24.157
gene-BW25113_1667	ydhR	CP009273.1	+	1740957	1741262	376.742	81.7299	57.2248
gene-BW25113_1668	ydhS	CP009273.1	+	1741388	1742992	13.0318	2.82709	1.97945
gene-BW25113_1669	ydhT	CP009273.1	-	1743004	1743816	8.77245	1.90308	1.33248
gene-BW25113_1670	ydhU	CP009273.1	-	1743820	1744605	8.12703	1.76307	1.23445
gene-BW25113_1671	ydhX	CP009273.1	-	1744602	1745270	7.33955	1.59223	1.11483
gene-BW25113_1672	ydhW	CP009273.1	-	1745334	1745981	11.7083	2.53999	1.77842
gene-BW25113_1673	ydhV	CP009273.1	-	1745985	1748087	4.13267	0.896535	0.627727
gene-BW25113_1674	ydhY	CP009273.1	-	1748108	1748734	4.07815	0.884708	0.619446
gene-BW25113_1675	ydhZ	CP009273.1	-	1749189	1749398	146.481	31.7774	22.2496
gene-BW25113_1676	pykF	CP009273.1	+	1749955	1751367	2559.69	555.295	388.801
gene-BW25113_1677	lpp	CP009273.1	+	1751678	1751914	17641.2	3827.05	2679.58
gene-BW25113_1678	ldtE	CP009273.1	-	1751978	1752982	60.6388	13.1549	9.21066
gene-BW25113_1679	sufE	CP009273.1	-	1753131	1753547	73.0791	15.8537	11.1003
gene-BW25113_1680	sufS	CP009273.1	-	1753560	1754780	86.3459	18.7318	13.1154
gene-BW25113_1681	sufD	CP009273.1	-	1754777	1756048	107.069	23.2273	16.2631
gene-BW25113_1682	sufC	CP009273.1	-	1756023	1756769	120.381	26.1152	18.2851
gene-BW25113_1683	sufB	CP009273.1	-	1756779	1758266	143.848	31.2062	21.8496
gene-BW25113_1684	sufA	CP009273.1	-	1758275	1758643	141.195	30.6307	21.4467
gene-BW25113_1685	ydiH	CP009273.1	-	1759191	1759379	57.328	12.4367	8.70778
gene-BW25113_1686	menI	CP009273.1	-	1759479	1759889	112.358	24.3748	17.0665
gene-BW25113_1687	ydiJ	CP009273.1	-	1759886	1762942	96.4337	20.9202	14.6477
gene-BW25113_1688	ydiK	CP009273.1	+	1763331	1764443	161.433	35.0211	24.5207
gene-BW25113_1689	ydiL	CP009273.1	+	1764872	1765228	11.5826	2.51272	1.75933
gene-BW25113_1690	ydiM	CP009273.1	+	1765328	1766542	2.62621	0.569727	0.398905
gene-BW25113_1691	ydiN	CP009273.1	+	1766769	1768034	1.45516	0.31568	0.22103
gene-BW25113_1692	ydiB	CP009273.1	+	1768046	1768912	9.69896	2.10408	1.47321
gene-BW25113_1693	aroD	CP009273.1	+	1768943	1769701	86.581	18.7828	13.1511
gene-BW25113_1694	ydiF	CP009273.1	+	1769844	1771439	5.53145	1.19998	0.840193
gene-BW25113_1695	ydiO	CP009273.1	+	1771453	1772604	5.39149	1.16962	0.818935
gene-BW25113_1696	ydiP	CP009273.1	-	1772647	1773558	22.9901	4.98745	3.49206
gene-BW25113_1697	ydiQ	CP009273.1	+	1773874	1774638	6.04183	1.31071	0.917717
gene-BW25113_1698	ydiR	CP009273.1	+	1774658	1775596	5.55165	1.20437	0.843262
gene-BW25113_1699	ydiS	CP009273.1	+	1775652	1776941	3.36357	0.729689	0.510906
gene-BW25113_1700	ydiT	CP009273.1	+	1776938	1777231	0.542857	0.117767	0.082457
gene-BW25113_1701	fadK	CP009273.1	+	1777288	1778934	4.95993	1.076	0.753383
gene-BW25113_1702	ppsA	CP009273.1	-	1778991	1781369	294.459	63.8794	44.7265
gene-BW25113_1703	ppsR	CP009273.1	+	1781702	1782535	60.1966	13.059	9.1435
gene-BW25113_1704	aroH	CP009273.1	+	1782692	1783738	136.979	29.716	20.8063
gene-BW25113_1705	ydiE	CP009273.1	+	1783870	1784061	253.651	55.0267	38.528
gene-BW25113_1706	ydiU	CP009273.1	-	1784065	1785501	261.493	56.7279	39.7191
gene-BW25113_1707	ydiV	CP009273.1	-	1785564	1786277	35.9006	7.78822	5.45308
gene-BW25113_1708	nlpC	CP009273.1	-	1786524	1786988	239.342	51.9225	36.3546
gene-BW25113_1709	btuD	CP009273.1	-	1787066	1787815	0.453352	0.09835	0.068861
gene-BW25113_1710	btuE	CP009273.1	-	1787815	1788366	205.132	44.5011	31.1583
gene-BW25113_1711	btuC	CP009273.1	-	1788429	1789409	95.3874	20.6932	14.4888
gene-BW25113_1712	ihfA	CP009273.1	-	1789510	1789809	8041.7	1744.56	1221.49
gene-BW25113_1713	pheT	CP009273.1	-	1789814	1792201	4482.11	972.343	680.805
gene-BW25113_1714	pheS	CP009273.1	-	1792216	1793199	3320.47	720.339	504.359
gene-BW25113_1715	pheM	CP009273.1	-	1793483	1793527	106	22.9955	16.1008
gene-BW25113_1716	rplT	CP009273.1	-	1793650	1794006	39895.1	8654.78	6059.82
gene-BW25113_1717	rpmI	CP009273.1	-	1794059	1794256	60792.9	13188.3	9234.06
gene-BW25113_1718	infC	CP009273.1	-	1794353	1794895	38616.1	8377.33	5865.56
gene-BW25113_1719	thrS	CP009273.1	-	1794899	1796827	5200.38	1128.16	789.905
gene-BW25113_1722	ydiY	CP009273.1	-	1799582	1800340	249.676	54.1643	37.9242
gene-BW25113_1723	pfkB	CP009273.1	+	1800627	1801556	131.117	28.4444	19.9159
gene-BW25113_1724	ydiZ	CP009273.1	+	1801657	1801947	66.7423	14.479	10.1377
gene-BW25113_1725	yniA	CP009273.1	+	1802053	1802913	138.916	30.1363	21.1005
gene-BW25113_1726	yniB	CP009273.1	-	1802954	1803490	194.71	42.24	29.5752
gene-BW25113_1727	yniC	CP009273.1	+	1803637	1804305	246.743	53.5281	37.4787
gene-BW25113_1728	ydjM	CP009273.1	+	1804468	1805058	87.9052	19.07	13.3523
gene-BW25113_1729	ydjN	CP009273.1	+	1805191	1806582	189.953	41.2082	28.8527
gene-BW25113_1730	ydjO	CP009273.1	-	1806586	1807389	1.70771	0.370468	0.259391
gene-BW25113_1731	cedA	CP009273.1	-	1807678	1807920	106.321	23.0651	16.1495
gene-BW25113_1732	katE	CP009273.1	+	1808124	1810385	6.79178	1.4734	1.03163
gene-BW25113_1733	chbG	CP009273.1	-	1810643	1811392	55.1947	11.9739	8.38373
gene-BW25113_1734	chbF	CP009273.1	-	1811405	1812757	25.2653	5.48103	3.83765
gene-BW25113_1735	chbR	CP009273.1	-	1812862	1813704	54.8446	11.8979	8.33056
gene-BW25113_1736	chbA	CP009273.1	-	1813712	1814062	86.1197	18.6827	13.081
gene-BW25113_1737	chbC	CP009273.1	-	1814113	1815471	35.2428	7.64553	5.35317
gene-BW25113_1738	chbB	CP009273.1	-	1815556	1815876	294.075	63.7962	44.6682
gene-BW25113_1739	osmE	CP009273.1	-	1816175	1816513	238.97	51.8419	36.2982
gene-BW25113_1740	nadE	CP009273.1	+	1816715	1817542	583.71	126.629	88.662
gene-BW25113_1741	cho	CP009273.1	+	1817772	1818659	46.045	9.98895	6.99396
gene-BW25113_1742	ves	CP009273.1	-	1818619	1819194	10.3351	2.24208	1.56983
gene-BW25113_1743	spy	CP009273.1	-	1819397	1819882	59.251	12.8538	8.99987
gene-BW25113_1744	astE	CP009273.1	-	1820212	1821180	2.5721	0.557988	0.390686
gene-BW25113_1745	astB	CP009273.1	-	1821173	1822516	8.61729	1.86942	1.30891
gene-BW25113_1746	astD	CP009273.1	-	1822513	1823991	6.35941	1.3796	0.965955
gene-BW25113_1747	astA	CP009273.1	-	1823988	1825022	4.31434	0.935947	0.655322
gene-BW25113_1748	astC	CP009273.1	-	1825019	1826239	3.62599	0.786617	0.550766
gene-BW25113_1749	xthA	CP009273.1	+	1826685	1827491	403.045	87.4359	61.22
gene-BW25113_1750	ydjX	CP009273.1	+	1827658	1828368	47.6301	10.3328	7.23472
gene-BW25113_1751	ydjY	CP009273.1	+	1828373	1829050	60.4499	13.1139	9.18196
gene-BW25113_1752	ydjZ	CP009273.1	+	1829065	1829772	42.7573	9.2757	6.49457
gene-BW25113_1753	ynjA	CP009273.1	+	1829772	1830320	37.9373	8.23006	5.76244
gene-BW25113_1754	ynjB	CP009273.1	+	1830330	1831496	29.6805	6.43885	4.50829
gene-BW25113_1755	ynjC	CP009273.1	+	1831469	1833004	0.577193	0.125215	0.087672
gene-BW25113_1756	ynjD	CP009273.1	+	1833004	1833657	32.5983	7.07184	4.95149
gene-BW25113_1757	ynjE	CP009273.1	+	1833724	1835031	102.521	22.2407	15.5723
gene-BW25113_1758	ynjF	CP009273.1	-	1835040	1835660	37.6055	8.15808	5.71204
gene-BW25113_1759	nudG	CP009273.1	+	1835747	1836154	62.3456	13.5252	9.46991
gene-BW25113_1760	ynjH	CP009273.1	-	1836120	1836392	36.4176	7.90038	5.53161
gene-BW25113_1761	gdhA	CP009273.1	+	1836628	1837971	296.229	64.2635	44.9954
gene-BW25113_1762	ynjI	CP009273.1	-	1838088	1839128	37.0355	8.03444	5.62547
gene-BW25113_1763	topB	CP009273.1	-	1839256	1841217	583.423	126.567	88.6183
gene-BW25113_1764	selD	CP009273.1	-	1841222	1842265	1225.5	265.857	186.145
gene-BW25113_1765	ydjA	CP009273.1	-	1842382	1842933	561.431	121.796	85.278
gene-BW25113_1766	sppA	CP009273.1	+	1843094	1844950	333.156	72.2743	50.6043
gene-BW25113_1767	ansA	CP009273.1	+	1845117	1846133	397.93	86.3264	60.4432
gene-BW25113_1768	pncA	CP009273.1	+	1846144	1846785	457.484	99.246	69.4891
gene-BW25113_1769	ydjE	CP009273.1	-	1846878	1848236	16.2266	3.52018	2.46473
gene-BW25113_1770	ydjF	CP009273.1	-	1848353	1849111	157.754	34.2229	23.9618
gene-BW25113_1771	ydjG	CP009273.1	-	1849248	1850228	25.209	5.4688	3.82909
gene-BW25113_1772	ydjH	CP009273.1	-	1850238	1851185	21.5654	4.67837	3.27565
gene-BW25113_1773	ydjI	CP009273.1	-	1851190	1852026	21.2401	4.60781	3.22625
gene-BW25113_1774	ydjJ	CP009273.1	-	1852047	1853090	13.1657	2.85615	1.99979
gene-BW25113_1775	ydjK	CP009273.1	-	1853107	1854486	8.92101	1.93531	1.35505
gene-BW25113_1776	ydjL	CP009273.1	-	1854513	1855589	26.1671	5.67666	3.97463
gene-BW25113_1777	yeaC	CP009273.1	-	1855959	1856231	737.476	159.987	112.018
gene-BW25113_1778	msrB	CP009273.1	-	1856273	1856686	728.092	157.951	110.593
gene-BW25113_1779	gapA	CP009273.1	+	1857028	1858023	26593.2	5769.08	4039.34
gene-BW25113_1780	yeaD	CP009273.1	+	1858107	1858991	412.072	89.3944	62.5913
gene-BW25113_1781	yeaE	CP009273.1	-	1859039	1859893	159.108	34.5166	24.1675
gene-BW25113_1782	mipA	CP009273.1	-	1859983	1860729	1636.67	355.057	248.6
gene-BW25113_1783	yeaG	CP009273.1	+	1861165	1863099	20.8574	4.52477	3.16811
gene-BW25113_1784	yeaH	CP009273.1	+	1863212	1864495	7.1581	1.55287	1.08727
gene-BW25113_1785	yeaI	CP009273.1	+	1864642	1866117	4.99602	1.08383	0.758865
gene-BW25113_1786	yeaJ	CP009273.1	+	1866298	1867788	46.0322	9.98616	6.99201
gene-BW25113_1787	yeaK	CP009273.1	+	1867831	1868334	247.562	53.7056	37.6031
gene-BW25113_1788	yoaI	CP009273.1	-	1868335	1868439	80.9905	17.57	12.302
gene-BW25113_1789	yeaL	CP009273.1	+	1868609	1869055	64.6465	14.0243	9.81941
gene-BW25113_1790	yeaM	CP009273.1	-	1869012	1869833	41.6667	9.03911	6.32891
gene-BW25113_1791	yeaN	CP009273.1	+	1869930	1871111	33.6438	7.29864	5.11029
gene-BW25113_1792	yeaO	CP009273.1	+	1871166	1871513	172.586	37.4406	26.2148
gene-BW25113_1793	yoaF	CP009273.1	-	1871535	1871789	116.114	25.1896	17.637
gene-BW25113_1794	yeaP	CP009273.1	+	1871972	1872997	137.038	29.7288	20.8152
gene-BW25113_1795	yeaQ	CP009273.1	-	1873264	1873512	109.241	23.6986	16.593
gene-BW25113_1796	yoaG	CP009273.1	-	1873660	1873842	13.1913	2.86169	2.00367
gene-BW25113_1797	yeaR	CP009273.1	-	1873846	1874205	20.5444	4.45688	3.12058
gene-BW25113_1798	leuE	CP009273.1	-	1874378	1875016	115.603	25.0786	17.5593
gene-BW25113_1799	dmlR	CP009273.1	-	1875143	1876066	151.172	32.7951	22.9621
gene-BW25113_1800	dmlA	CP009273.1	+	1876169	1877254	14.4245	3.12923	2.19099
gene-BW25113_1801	yeaV	CP009273.1	+	1877445	1878890	7.80429	1.69305	1.18542
gene-BW25113_1802	yeaW	CP009273.1	+	1878922	1880046	5.90044	1.28003	0.896241
gene-BW25113_1803	yeaX	CP009273.1	+	1880102	1881067	11.5839	2.51299	1.75952
gene-BW25113_1804	rnd	CP009273.1	-	1881121	1882248	247.563	53.706	37.6033
gene-BW25113_1805	fadD	CP009273.1	-	1882318	1884003	192.778	41.821	29.2818
gene-BW25113_1806	yeaY	CP009273.1	-	1884208	1884789	418.239	90.7322	63.5279
gene-BW25113_1807	tsaB	CP009273.1	-	1884829	1885524	331.437	71.9014	50.3432
gene-BW25113_1808	yoaA	CP009273.1	-	1885582	1887492	121.793	26.4216	18.4996
gene-BW25113_1809	yoaB	CP009273.1	+	1887624	1887968	796.507	172.793	120.985
gene-BW25113_1810	yoaC	CP009273.1	+	1888390	1888689	94.7867	20.5629	14.3975
gene-BW25113_1811	yoaH	CP009273.1	-	1888809	1888988	263.638	57.1932	40.0449
gene-BW25113_1812	pabB	CP009273.1	+	1889062	1890423	62.8695	13.6388	9.54949
gene-BW25113_1813	nudL	CP009273.1	+	1890427	1891005	104.53	22.6766	15.8775
gene-BW25113_1814	sdaA	CP009273.1	+	1891189	1892553	499.818	108.43	75.9193
gene-BW25113_1815	yoaD	CP009273.1	+	1892684	1894282	10.5747	2.29407	1.60624
gene-BW25113_1816	yoaE	CP009273.1	-	1894286	1895842	137.63	29.8573	20.9052
gene-BW25113_1817	manX	CP009273.1	+	1896305	1897276	4203.61	911.924	638.502
gene-BW25113_1818	manY	CP009273.1	+	1897339	1898139	2894.84	628.002	439.708
gene-BW25113_1819	manZ	CP009273.1	+	1898152	1899003	2553.89	554.037	387.92
gene-BW25113_1820	yobD	CP009273.1	+	1899058	1899516	115.139	24.9782	17.489
gene-BW25113_1821	mntP	CP009273.1	+	1899945	1900511	24.776	5.37487	3.76333
gene-BW25113_1822	rlmA	CP009273.1	-	1900508	1901317	215.747	46.8038	32.7706
gene-BW25113_1823	cspC	CP009273.1	-	1901483	1901692	13914.9	3018.69	2113.59
gene-BW25113_1824	yobF	CP009273.1	-	1901705	1901848	20031.9	4345.68	3042.72
gene-BW25113_1825	yebO	CP009273.1	-	1902518	1902805	1036.48	224.853	157.435
gene-BW25113_1826	mgrB	CP009273.1	-	1902880	1903023	848.868	184.152	128.938
gene-BW25113_1827	kdgR	CP009273.1	-	1903565	1904356	524.321	113.745	79.6411
gene-BW25113_1828	yebQ	CP009273.1	+	1904533	1905906	19.0269	4.12768	2.89007
gene-BW25113_1829	htpX	CP009273.1	-	1905952	1906833	644.101	139.73	97.835
gene-BW25113_1830	prc	CP009273.1	-	1907025	1909073	1016.1	220.431	154.339
gene-BW25113_1831	proQ	CP009273.1	-	1909093	1909791	3751.1	813.758	569.769
gene-BW25113_1832	msrC	CP009273.1	-	1909888	1910385	913.916	198.264	138.818
gene-BW25113_1833	yebS	CP009273.1	+	1910515	1911798	59.3299	12.8709	9.01184
gene-BW25113_1834	yebT	CP009273.1	+	1911767	1914400	92.4273	20.051	14.0391
gene-BW25113_1835	rsmF	CP009273.1	+	1914480	1915919	72.959	15.8276	11.082
gene-BW25113_1836	yebV	CP009273.1	+	1916037	1916273	51.1308	11.0922	7.76646
gene-BW25113_1837	yebW	CP009273.1	+	1916378	1916569	67.1875	14.5756	10.2054
gene-BW25113_1838	pphA	CP009273.1	-	1916570	1917226	22.7184	4.9285	3.45079
gene-BW25113_1839	yebY	CP009273.1	-	1917622	1917963	797.851	173.085	121.189
gene-BW25113_1840	yebZ	CP009273.1	-	1917976	1918848	604.816	131.208	91.8678
gene-BW25113_1841	yobA	CP009273.1	-	1918852	1919226	864.661	187.578	131.337
gene-BW25113_1842	holE	CP009273.1	+	1919365	1919595	215.892	46.8353	32.7926
gene-BW25113_1843	yobB	CP009273.1	+	1919697	1920353	81.8813	17.7632	12.4373
gene-BW25113_1844	exoX	CP009273.1	+	1920377	1921039	131.635	28.5567	19.9945
gene-BW25113_1845	ptrB	CP009273.1	-	1921036	1923096	48.4168	10.5035	7.35421
gene-BW25113_1846	yebE	CP009273.1	-	1923305	1923964	80.9924	17.5704	12.3023
gene-BW25113_1847	yebF	CP009273.1	-	1924291	1924647	337.754	73.2718	51.3027
gene-BW25113_1848	yebG	CP009273.1	-	1924714	1925004	495.412	107.474	75.2501
gene-BW25113_1849	purT	CP009273.1	+	1925138	1926316	21.2952	4.61974	3.23461
gene-BW25113_1850	eda	CP009273.1	-	1926372	1927013	965.456	209.445	146.647
gene-BW25113_1851	edd	CP009273.1	-	1927050	1928861	383.782	83.2571	58.2941
gene-BW25113_1852	zwf	CP009273.1	-	1929096	1930571	888.613	192.775	134.975
gene-BW25113_1853	yebK	CP009273.1	+	1930909	1931778	949.561	205.996	144.232
gene-BW25113_1854	pykA	CP009273.1	+	1931906	1933348	1718.7	372.853	261.06
gene-BW25113_1855	lpxM	CP009273.1	-	1933479	1934450	374.192	81.1768	56.8375
gene-BW25113_1856	mepM	CP009273.1	-	1934570	1935892	383.97	83.2979	58.3227
gene-BW25113_1857	znuA	CP009273.1	-	1935908	1936840	575.561	124.861	87.4241
gene-BW25113_1858	znuC	CP009273.1	+	1936919	1937674	156.015	33.8457	23.6978
gene-BW25113_1859	znuB	CP009273.1	+	1937671	1938456	100.908	21.8908	15.3273
gene-BW25113_1860	ruvB	CP009273.1	-	1938603	1939613	236.348	51.273	35.8998
gene-BW25113_1861	ruvA	CP009273.1	-	1939622	1940233	273.149	59.2565	41.4896
gene-BW25113_1862	yebB	CP009273.1	+	1940508	1941110	10.0116	2.17191	1.5207
gene-BW25113_1863	ruvC	CP009273.1	-	1941112	1941633	1646.34	357.155	250.069
gene-BW25113_1864	yebC	CP009273.1	-	1941668	1942408	2407.96	522.379	365.754
gene-BW25113_1865	nudB	CP009273.1	-	1942437	1942889	1656.04	359.259	251.543
gene-BW25113_1866	aspS	CP009273.1	-	1943007	1944779	1730.73	375.462	262.887
gene-BW25113_1867	yecD	CP009273.1	+	1945089	1945655	246.349	53.4427	37.419
gene-BW25113_1868	yecE	CP009273.1	+	1945652	1946470	75.1342	16.2995	11.4124
gene-BW25113_1869	yecN	CP009273.1	+	1946523	1946918	235.402	51.0677	35.7561
gene-BW25113_1870	cmoA	CP009273.1	+	1946959	1947702	231.902	50.3084	35.2245
gene-BW25113_1871	cmoB	CP009273.1	+	1947699	1948670	226.822	49.2065	34.4529
gene-BW25113_1872	torZ	CP009273.1	-	1948835	1951264	14.2012	3.0808	2.15708
gene-BW25113_1873	torY	CP009273.1	-	1951289	1952389	6.07902	1.31877	0.923366
gene-BW25113_1874	cutC	CP009273.1	-	1952777	1953523	159.133	34.522	24.1713
gene-BW25113_1875	yecM	CP009273.1	-	1953537	1954103	180.72	39.2051	27.4502
gene-BW25113_1876	argS	CP009273.1	+	1954319	1956052	617.761	134.016	93.8342
gene-BW25113_1877	yecT	CP009273.1	+	1956229	1956717	18.2843	3.96656	2.77727
gene-BW25113_1878	flhE	CP009273.1	-	1956837	1957229	49.4608	10.73	7.51279
gene-BW25113_1879	flhA	CP009273.1	-	1957229	1959307	70.7166	15.3412	10.7414
gene-BW25113_1880	flhB	CP009273.1	-	1959300	1960448	59.5142	12.9109	9.03984
gene-BW25113_1881	cheZ	CP009273.1	-	1960650	1961294	24.5364	5.3229	3.72693
gene-BW25113_1882	cheY	CP009273.1	-	1961305	1961694	30.4744	6.61107	4.62887
gene-BW25113_1883	cheB	CP009273.1	-	1961709	1962758	8.60381	1.8665	1.30687
gene-BW25113_1884	cheR	CP009273.1	-	1962761	1963621	5.68989	1.23436	0.86426
gene-BW25113_1885	tap	CP009273.1	-	1963640	1965241	6.01311	1.30448	0.913354
gene-BW25113_1886	tar	CP009273.1	-	1965287	1966948	7.20337	1.56269	1.09415
gene-BW25113_1887	cheW	CP009273.1	-	1967093	1967596	24.5635	5.32877	3.73104
gene-BW25113_1888	cheA	CP009273.1	-	1967617	1969581	14.544	3.15516	2.20915
gene-BW25113_1889	motB	CP009273.1	-	1969586	1970512	14.9287	3.23861	2.26757
gene-BW25113_1890	motA	CP009273.1	-	1970509	1971396	11.7941	2.55859	1.79144
gene-BW25113_1891	flhC	CP009273.1	-	1971523	1972101	130.427	28.2946	19.811
gene-BW25113_1892	flhD	CP009273.1	-	1972104	1972454	160.373	34.7911	24.3597
gene-BW25113_1895	uspC	CP009273.1	+	1973234	1973662	193.732	42.0279	29.4267
gene-BW25113_1896	otsA	CP009273.1	-	1973669	1975093	26.5435	5.7583	4.03179
gene-BW25113_1897	otsB	CP009273.1	-	1975068	1975868	11.0532	2.39786	1.67891
gene-BW25113_1900	araG	CP009273.1	-	1977036	1978550	18.9003	4.10021	2.87084
gene-BW25113_1901	araF	CP009273.1	-	1978620	1979609	7.94444	1.72346	1.20671
gene-BW25113_1902	ftnB	CP009273.1	+	1980406	1980909	155.843	33.8084	23.6716
gene-BW25113_1904	yecR	CP009273.1	+	1981703	1982026	117.886	25.574	17.9061
gene-BW25113_1905	ftnA	CP009273.1	+	1982197	1982694	581.055	126.053	88.2587
gene-BW25113_1906	yecH	CP009273.1	-	1982732	1982971	209.565	45.4627	31.8316
gene-BW25113_1907	tyrP	CP009273.1	+	1983162	1984373	69.9662	15.1784	10.6274
gene-BW25113_1908	yecA	CP009273.1	-	1984435	1985100	588.653	127.702	89.4128
gene-BW25113_1909	leuZ	CP009273.1	-	1985296	1985382	3519.63	763.544	534.611
gene-BW25113_1910	cysT	CP009273.1	-	1985395	1985468	3893.81	844.718	591.446
gene-BW25113_1911	glyW	CP009273.1	-	1985523	1985598	4792.47	1039.67	727.946
gene-BW25113_1912	pgsA	CP009273.1	-	1985750	1986298	419.634	91.0348	63.7398
gene-BW25113_1913	uvrC	CP009273.1	-	1986355	1988187	335.669	72.8196	50.9861
gene-BW25113_1914	uvrY	CP009273.1	-	1988184	1988840	703.224	152.556	106.815
gene-BW25113_1915	yecF	CP009273.1	+	1989299	1989523	323.347	70.1464	49.1144
gene-BW25113_1916	sdiA	CP009273.1	-	1989591	1990313	433.667	94.079	65.8713
gene-BW25113_1917	yecC	CP009273.1	-	1990543	1991295	85.8151	18.6166	13.0348
gene-BW25113_1918	yecS	CP009273.1	-	1991292	1991960	83.4712	18.1081	12.6788
gene-BW25113_1919	dcyD	CP009273.1	-	1991975	1992961	129.839	28.1671	19.7217
gene-BW25113_1920	fliY	CP009273.1	-	1993066	1993866	313.775	68.07	47.6605
gene-BW25113_1921	fliZ	CP009273.1	-	1993954	1994505	161.784	35.0973	24.5741
gene-BW25113_1922	fliA	CP009273.1	-	1994551	1995270	305.893	66.36	46.4633
gene-BW25113_1923	fliC	CP009273.1	-	1995591	1997087	107.091	23.2321	16.2664
gene-BW25113_1924	fliD	CP009273.1	+	1997353	1998759	34.1379	7.40583	5.18534
gene-BW25113_1925	fliS	CP009273.1	+	1998784	1999194	43.6119	9.4611	6.62438
gene-BW25113_1926	fliT	CP009273.1	+	1999194	1999559	33.7342	7.31825	5.12401
gene-BW25113_1927	amyA	CP009273.1	+	1999637	2001124	43.2944	9.39222	6.57615
gene-BW25113_1928	yedD	CP009273.1	-	2001158	2001571	710.454	154.125	107.914
gene-BW25113_1929	yedE	CP009273.1	+	2001758	2002963	210.387	45.6411	31.9565
gene-BW25113_1930	yedF	CP009273.1	+	2002960	2003193	352.667	76.5072	53.568
gene-BW25113_1931	yedK	CP009273.1	+	2003302	2003970	11.997	2.60262	1.82227
gene-BW25113_1932	yedL	CP009273.1	+	2004081	2004560	8.62292	1.87064	1.30977
gene-BW25113_1936	intG	CP009273.1	+	2005983	2006144	63.4938	13.7743	9.64432
gene-BW25113_1937	fliE	CP009273.1	-	2006181	2006495	148.206	32.1517	22.5116
gene-BW25113_1938	fliF	CP009273.1	+	2006710	2008368	252.491	54.775	38.3518
gene-BW25113_1939	fliG	CP009273.1	+	2008361	2009356	273.892	59.4178	41.6026
gene-BW25113_1940	fliH	CP009273.1	+	2009349	2010035	4.72739	1.02555	0.718062
gene-BW25113_1941	fliI	CP009273.1	+	2010035	2011408	138.883	30.1291	21.0955
gene-BW25113_1942	fliJ	CP009273.1	+	2011427	2011870	129.629	28.1216	19.6899
gene-BW25113_1943	fliK	CP009273.1	+	2011867	2012994	84.567	18.3459	12.8452
gene-BW25113_1944	fliL	CP009273.1	+	2013099	2013563	679.753	147.465	103.25
gene-BW25113_1945	fliM	CP009273.1	+	2013568	2014572	510.547	110.757	77.5489
gene-BW25113_1946	fliN	CP009273.1	+	2014569	2014982	357.506	77.5569	54.303
gene-BW25113_1947	fliO	CP009273.1	+	2014985	2015350	165.57	35.9186	25.1491
gene-BW25113_1948	fliP	CP009273.1	+	2015350	2016087	76.6235	16.6226	11.6386
gene-BW25113_1949	fliQ	CP009273.1	+	2016097	2016366	76.2778	16.5476	11.5861
gene-BW25113_1950	fliR	CP009273.1	+	2016374	2017159	29.7316	6.44992	4.51604
gene-BW25113_1951	rcsA	CP009273.1	+	2017449	2018072	28.1314	6.10279	4.27299
gene-BW25113_1952	dsrB	CP009273.1	-	2018116	2018304	242.529	52.6139	36.8387
gene-BW25113_1953	yodD	CP009273.1	+	2018467	2018694	16.2763	3.53096	2.47227
gene-BW25113_1954	dsrA	CP009273.1	-	2018708	2018794	4.72414	1.02485	0.717568
gene-BW25113_1955	yedP	CP009273.1	+	2018992	2019807	14.7451	3.19878	2.23969
gene-BW25113_1956	yedQ	CP009273.1	-	2019804	2021498	43.9882	9.54274	6.68154
gene-BW25113_1957	yodC	CP009273.1	-	2021669	2021851	266.169	57.7424	40.4295
gene-BW25113_1958	yedI	CP009273.1	-	2021930	2022847	240.882	52.2567	36.5886
gene-BW25113_1959	yedA	CP009273.1	+	2023020	2023940	45.4115	9.85151	6.89773
gene-BW25113_1960	vsr	CP009273.1	-	2023929	2024399	94.2577	20.4481	14.3172
gene-BW25113_1961	dcm	CP009273.1	-	2024380	2025798	183.67	39.8451	27.8983
gene-BW25113_1962	yedJ	CP009273.1	-	2025865	2026560	100.909	21.8912	15.3275
gene-BW25113_1963	yedR	CP009273.1	-	2026600	2026965	11.2698	2.44486	1.71182
gene-BW25113_1967	hchA	CP009273.1	+	2029316	2030167	28.2453	6.1275	4.29029
gene-BW25113_1968	yedV	CP009273.1	-	2030275	2031633	0.335404	0.072762	0.050946
gene-BW25113_1969	yedW	CP009273.1	-	2031633	2032304	78.339	16.9948	11.8992
gene-BW25113_1970	hiuH	CP009273.1	+	2032437	2032850	12.3019	2.66877	1.86859
gene-BW25113_1971	yedY	CP009273.1	+	2032959	2033963	18.1224	3.93145	2.75268
gene-BW25113_1972	yedZ	CP009273.1	+	2033964	2034599	12.989	2.81781	1.97295
gene-BW25113_1973	zinT	CP009273.1	+	2034856	2035506	15.4378	3.34905	2.34491
gene-BW25113_1974	yodB	CP009273.1	+	2035849	2036379	15.0621	3.26756	2.28785
gene-BW25113_1975	serU	CP009273.1	-	2036949	2037038	475.056	103.058	72.158
gene-BW25113_1976	mtfA	CP009273.1	+	2037132	2037929	276.135	59.9044	41.9433
gene-BW25113_1977	asnT	CP009273.1	+	2038030	2038105	100.724	21.8509	15.2993
gene-BW25113_1978	yeeJ	CP009273.1	+	2038419	2045495	18.998	4.12141	2.88568
gene-BW25113_1981	shiA	CP009273.1	+	2047124	2048440	135.43	29.3799	20.571
gene-BW25113_1982	amn	CP009273.1	+	2048542	2049996	228.81	49.6376	34.7548
gene-BW25113_1983	yeeN	CP009273.1	+	2050339	2051055	903.95	196.102	137.304
gene-BW25113_1984	asnW	CP009273.1	-	2051508	2051583	24.3684	5.28645	3.70141
gene-BW25113_1985	yeeO	CP009273.1	-	2051684	2053171	22.7762	4.94104	3.45957
gene-BW25113_1986	asnU	CP009273.1	+	2053332	2053407	25.0526	5.43488	3.80534
gene-BW25113_1987	cbl	CP009273.1	-	2053445	2054395	22.0074	4.77425	3.34278
gene-BW25113_1988	nac	CP009273.1	-	2054497	2055414	8.60784	1.86737	1.30748
gene-BW25113_1989	asnV	CP009273.1	+	2055741	2055816	15.0921	3.27406	2.2924
gene-BW25113_1990	ldtA	CP009273.1	-	2055872	2056804	61.5616	13.3551	9.35084
gene-BW25113_1991	cobT	CP009273.1	-	2056869	2057948	105.532	22.8941	16.0297
gene-BW25113_1992	cobS	CP009273.1	-	2057960	2058703	82.6715	17.9346	12.5573
gene-BW25113_1993	cobU	CP009273.1	-	2058700	2059245	136.259	29.5598	20.6969
gene-BW25113_1994	insH1	CP009273.1	-	2059786	2060802	246.813	53.5432	37.4893
gene-BW25113_1996	insD1	CP009273.1	-	2062433	2063338	50.2579	10.9029	7.63386
gene-BW25113_1997	insC1	CP009273.1	-	2063296	2063661	53.9544	11.7048	8.19535
gene-BW25113_1999	yeeP	CP009273.1	+	2064141	2064692	14.8696	3.22578	2.2586
gene-BW25113_2000	flu	CP009273.1	+	2065020	2068139	196.525	42.6338	29.8509
gene-BW25113_2001	yeeR	CP009273.1	+	2068260	2069792	41.5998	9.02461	6.31876
gene-BW25113_2002	yeeS	CP009273.1	+	2069789	2070235	37.3523	8.10317	5.67359
gene-BW25113_2003	yeeT	CP009273.1	+	2070298	2070519	13.1847	2.86027	2.00267
gene-BW25113_2004	cbeA	CP009273.1	+	2070593	2070961	10.3577	2.24699	1.57327
gene-BW25113_2005	cbtA	CP009273.1	+	2071050	2071424	6.57781	1.42698	0.999129
gene-BW25113_2006	yeeW	CP009273.1	+	2071421	2071588	22.7281	4.9306	3.45226
gene-BW25113_2007	yeeX	CP009273.1	-	2072513	2072842	1833.74	397.81	278.534
gene-BW25113_2008	yeeA	CP009273.1	-	2073014	2074072	50.7318	11.0057	7.70585
gene-BW25113_2009	sbmC	CP009273.1	-	2074270	2074743	102.97	22.3383	15.6406
gene-BW25113_2010	dacD	CP009273.1	-	2074862	2076028	39.3993	8.54723	5.98452
gene-BW25113_2011	sbcB	CP009273.1	+	2076237	2077664	196.728	42.6779	29.8818
gene-BW25113_2012	yeeD	CP009273.1	-	2077707	2077934	358.895	77.8581	54.5139
gene-BW25113_2013	yeeE	CP009273.1	-	2077948	2079006	68.0472	14.7621	10.336
gene-BW25113_2014	plaP	CP009273.1	-	2079185	2080543	1151.98	249.91	174.979
gene-BW25113_2015	yeeY	CP009273.1	-	2080810	2081739	53.9677	11.7077	8.19737
gene-BW25113_2016	yeeZ	CP009273.1	-	2081785	2082609	514.75	111.669	78.1874
gene-BW25113_2017	yefM	CP009273.1	-	2082943	2083194	400.423	86.8671	60.8217
gene-BW25113_2018	hisL	CP009273.1	+	2083477	2083527	18.5882	4.03251	2.82344
gene-BW25113_2019	hisG	CP009273.1	+	2083673	2084572	147.098	31.9112	22.3433
gene-BW25113_2020	hisD	CP009273.1	+	2084578	2085882	124.166	26.9364	18.8601
gene-BW25113_2021	hisC	CP009273.1	+	2085879	2086949	1.80361	0.391272	0.273957
gene-BW25113_2022	hisB	CP009273.1	+	2086949	2088016	169.52	36.7755	25.7491
gene-BW25113_2023	hisH	CP009273.1	+	2088016	2088606	59.1007	12.8212	8.97704
gene-BW25113_2024	hisA	CP009273.1	+	2088606	2089343	126.423	27.4259	19.2028
gene-BW25113_2025	hisF	CP009273.1	+	2089325	2090101	183.178	39.7384	27.8237
gene-BW25113_2026	hisI	CP009273.1	+	2090095	2090706	166.934	36.2144	25.3562
gene-BW25113_2027	wzzB	CP009273.1	-	2090802	2091782	1402.82	304.326	213.08
gene-BW25113_2028	ugd	CP009273.1	-	2091928	2093094	49.9777	10.8421	7.59131
gene-BW25113_2029	gnd	CP009273.1	-	2093343	2094749	3517.46	763.072	534.28
gene-BW25113_2030	insH1	CP009273.1	-	2095376	2096392	431.211	93.5464	65.4983
gene-BW25113_2032	wbbK	CP009273.1	-	2096872	2097990	368.134	79.8624	55.9172
gene-BW25113_2033	wbbJ	CP009273.1	-	2097975	2098565	1047.04	227.143	159.039
gene-BW25113_2034	wbbI	CP009273.1	-	2098546	2099538	735.539	159.567	111.724
gene-BW25113_2035	wbbH	CP009273.1	-	2099541	2100707	0.616253	0.133689	0.093605
gene-BW25113_2036	glf	CP009273.1	-	2100707	2101810	1001.08	217.173	152.058
gene-BW25113_2037	wzxB	CP009273.1	-	2101818	2103065	397.452	86.2226	60.3705
gene-BW25113_2038	rfbC	CP009273.1	-	2103062	2103619	38.8877	8.43626	5.90681
gene-BW25113_2039	rfbA	CP009273.1	-	2103619	2104500	1540.44	334.182	233.984
gene-BW25113_2040	rfbD	CP009273.1	-	2104558	2105457	1312.42	284.715	199.348
gene-BW25113_2041	rfbB	CP009273.1	-	2105457	2106542	1094.62	237.466	166.267
gene-BW25113_2042	wcaN	CP009273.1	-	2106915	2107808	1108.76	240.532	168.413
gene-BW25113_2043	wcaM	CP009273.1	-	2107983	2109377	14.2703	3.09577	2.16756
gene-BW25113_2044	wcaL	CP009273.1	-	2109388	2110608	13.543	2.938	2.0571
gene-BW25113_2045	wcaK	CP009273.1	-	2110605	2111885	8.86417	1.92298	1.34641
gene-BW25113_2046	wzxC	CP009273.1	-	2112161	2113639	4.0311	0.874502	0.6123
gene-BW25113_2047	wcaJ	CP009273.1	-	2113641	2115035	3.13907	0.680985	0.476805
gene-BW25113_2048	cpsG	CP009273.1	-	2115090	2116460	5.04012	1.0934	0.765563
gene-BW25113_2049	cpsB	CP009273.1	-	2116565	2118001	4.38692	0.951692	0.666346
gene-BW25113_2050	wcaI	CP009273.1	-	2118004	2119227	3.58906	0.778605	0.545156
gene-BW25113_2051	wcaH	CP009273.1	-	2119224	2119703	5.03333	1.09192	0.764531
gene-BW25113_2052	wcaG	CP009273.1	-	2119706	2120671	7.44099	1.61424	1.13024
gene-BW25113_2053	gmd	CP009273.1	-	2120674	2121795	9.3779	2.03443	1.42444
gene-BW25113_2054	wcaF	CP009273.1	-	2121821	2122369	2.98867	0.648359	0.453961
gene-BW25113_2055	wcaE	CP009273.1	-	2122385	2123131	1.67399	0.363153	0.254269
gene-BW25113_2056	wcaD	CP009273.1	-	2123142	2124359	1.77504	0.385075	0.269618
gene-BW25113_2057	wcaC	CP009273.1	-	2124334	2125551	2.87685	0.624099	0.436976
gene-BW25113_2058	wcaB	CP009273.1	-	2125548	2126036	5.98977	1.29941	0.90981
gene-BW25113_2059	wcaA	CP009273.1	-	2126039	2126878	3.80119	0.824625	0.577378
gene-BW25113_2060	wzc	CP009273.1	-	2126971	2129133	2.23024	0.483824	0.338759
gene-BW25113_2061	wzb	CP009273.1	-	2129136	2129579	1.88063	0.407981	0.285656
gene-BW25113_2062	wza	CP009273.1	-	2129585	2130724	2.47227	0.536332	0.375523
gene-BW25113_2063	yegH	CP009273.1	+	2131383	2132966	142.129	30.8332	21.5885
gene-BW25113_2064	asmA	CP009273.1	-	2133240	2135093	206.826	44.8685	31.4156
gene-BW25113_2065	dcd	CP009273.1	-	2135115	2135696	637.775	138.358	96.8741
gene-BW25113_2066	udk	CP009273.1	-	2135788	2136429	299.559	64.986	45.5012
gene-BW25113_2067	yegE	CP009273.1	+	2136747	2140064	25.3816	5.50624	3.8553
gene-BW25113_2068	alkA	CP009273.1	-	2140173	2141021	47.2509	10.2505	7.17712
gene-BW25113_2069	yegD	CP009273.1	+	2141155	2142507	81.8751	17.7619	12.4363
gene-BW25113_2070	yegI	CP009273.1	-	2142520	2144466	13.7863	2.99079	2.09406
gene-BW25113_2071	yegJ	CP009273.1	+	2144666	2145127	11.842	2.56899	1.79873
gene-BW25113_2072	yegK	CP009273.1	-	2145192	2145953	6.73753	1.46163	1.02339
gene-BW25113_2073	yegL	CP009273.1	-	2145950	2146609	12.5879	2.7308	1.91202
gene-BW25113_2074	mdtA	CP009273.1	+	2147497	2148744	0.542468	0.117682	0.082398
gene-BW25113_2075	mdtB	CP009273.1	+	2148744	2151866	32.6014	7.07251	4.95196
gene-BW25113_2076	mdtC	CP009273.1	+	2151867	2154944	25.4802	5.52764	3.87028
[truncated: 2,501 more rows]

## Sheet: BW25113_wt Triplicate 3
# Description of Variables from the StringTie Manual
# Gene ID: The gene identifier comes from the reference annotation provided with the -G option.
# Gene Name: This field contains the gene name in the reference annotation provided with the -G option.
# Reference: Name of the reference sequence that was used in the alignment of the reads.
# Strand: '+' denotes that the gene is on the forward strand, '-' for the reverse strand.
# Start: Start position of the gene (1-based index).
# End: End position of the gene (1-based index).
# Coverage: Per-base coverage of the gene.
# FPKM: normalized expression level in FPKM units (see manual for additional details).
# TPM: normalized expression level in RPM units (see manual for additional details).
Gene ID	Gene Name	Reference	Strand	Start	End	Coverage	FPKM	TPM
gene-BW25113_0001	thrL	CP009273.1	+	190	255	292.03	67.9666	47.2537
gene-BW25113_0002	thrA	CP009273.1	+	337	2799	308.484	71.7959	49.916
gene-BW25113_0003	thrB	CP009273.1	+	2801	3733	354.727	82.5585	57.3987
gene-BW25113_0004	thrC	CP009273.1	+	3734	5020	321.571	74.8419	52.0337
gene-BW25113_0005	yaaX	CP009273.1	+	5234	5530	115.094	26.7868	18.6235
gene-BW25113_0006	yaaA	CP009273.1	-	5683	6459	304.864	70.9534	49.3303
gene-BW25113_0007	yaaJ	CP009273.1	-	6529	7959	162.665	37.8584	26.321
gene-BW25113_0008	talB	CP009273.1	+	8238	9191	6018.39	1400.71	973.841
gene-BW25113_0009	mog	CP009273.1	+	9306	9893	487.946	113.564	78.955
gene-BW25113_0010	satP	CP009273.1	-	9928	10494	128.187	29.834	20.7421
gene-BW25113_0011	yaaW	CP009273.1	-	10643	11356	11.6204	2.70452	1.88032
gene-BW25113_0013	yaaI	CP009273.1	-	11382	11786	13.0642	3.04054	2.11393
gene-BW25113_0014	dnaK	CP009273.1	+	12163	14079	8640.23	2010.91	1398.08
gene-BW25113_0015	dnaJ	CP009273.1	+	14168	15298	2265.43	527.252	366.571
gene-BW25113_0016	insL1	CP009273.1	+	15445	16557	486.645	113.261	78.7445
gene-BW25113_0018	mokC	CP009273.1	-	16751	16960	59.0086	13.7336	9.54824
gene-BW25113_0019	nhaA	CP009273.1	+	17489	18655	192.631	44.8325	31.1698
gene-BW25113_0020	nhaR	CP009273.1	+	18715	19620	109.765	25.5465	17.7612
gene-BW25113_0021	insB1	CP009273.1	-	19811	20314	49.5154	11.5241	8.01214
gene-BW25113_0022	insA	CP009273.1	-	20233	20508	69.9375	16.2771	11.3167
gene-BW25113_0023	rpsT	CP009273.1	-	20815	21078	15247.2	3548.6	2467.16
gene-BW25113_0024	yaaY	CP009273.1	+	21181	21399	164.553	38.2977	26.6264
gene-BW25113_0025	ribF	CP009273.1	+	21407	22348	1111.89	258.779	179.916
gene-BW25113_0026	ileS	CP009273.1	+	22391	25207	1708.74	397.69	276.493
gene-BW25113_0027	lspA	CP009273.1	+	25207	25701	1189.23	276.78	192.431
gene-BW25113_0028	fkpB	CP009273.1	+	25826	26275	646.018	150.353	104.533
gene-BW25113_0029	ispH	CP009273.1	+	26277	27227	579.381	134.844	93.7502
gene-BW25113_0030	rihC	CP009273.1	+	27293	28207	184.048	42.835	29.781
gene-BW25113_0031	dapB	CP009273.1	+	28374	29195	462.83	107.718	74.8909
gene-BW25113_0032	carA	CP009273.1	+	29651	30799	74.1445	17.2563	11.9974
gene-BW25113_0033	carB	CP009273.1	+	30817	34038	87.0925	20.2698	14.0925
gene-BW25113_0034	caiF	CP009273.1	+	34300	34695	45.2904	10.5408	7.32849
gene-BW25113_0035	caiE	CP009273.1	-	34781	35371	11.5567	2.68968	1.87
gene-BW25113_0036	caiD	CP009273.1	-	35377	36162	5.35114	1.24542	0.865874
gene-BW25113_0037	caiC	CP009273.1	-	36271	37824	18.6493	4.34041	3.01766
gene-BW25113_0038	caiB	CP009273.1	-	37898	39115	17.0706	3.97298	2.76221
gene-BW25113_0039	caiA	CP009273.1	-	39244	40386	37.5932	8.74937	6.08299
gene-BW25113_0040	caiT	CP009273.1	-	40417	41931	6.08119	1.41532	0.984003
gene-BW25113_0041	fixA	CP009273.1	+	42403	43173	6.32036	1.47099	1.0227
gene-BW25113_0042	fixB	CP009273.1	+	43188	44129	6.34713	1.47722	1.02704
gene-BW25113_0043	fixC	CP009273.1	+	44180	45466	5.79798	1.34941	0.938177
gene-BW25113_0044	fixX	CP009273.1	+	45463	45750	8.4375	1.96373	1.36528
gene-BW25113_0045	yaaU	CP009273.1	+	45807	47138	6.41066	1.49201	1.03732
gene-BW25113_0046	kefF	CP009273.1	+	47246	47776	31.8203	7.4058	5.14888
gene-BW25113_0047	kefC	CP009273.1	+	47769	49631	37.7646	8.78926	6.11073
gene-BW25113_0048	folA	CP009273.1	+	49823	50302	487.438	113.445	78.8728
gene-BW25113_0049	apaH	CP009273.1	-	50380	51222	247.571	57.6192	40.0596
gene-BW25113_0050	apaG	CP009273.1	-	51229	51606	819.085	190.632	132.537
gene-BW25113_0051	rsmA	CP009273.1	-	51609	52430	1078.31	250.963	174.482
gene-BW25113_0052	pdxA	CP009273.1	-	52427	53416	9.11759	2.12201	1.47533
gene-BW25113_0053	surA	CP009273.1	-	53416	54702	1454.56	338.532	235.364
gene-BW25113_0054	lptD	CP009273.1	-	54755	57109	980.969	228.309	158.732
gene-BW25113_0055	djlA	CP009273.1	+	57364	58179	194.009	45.1532	31.3927
gene-BW25113_0058	rluA	CP009273.1	-	59687	60346	581.973	135.447	94.1696
gene-BW25113_0059	rapA	CP009273.1	-	60358	63264	417.218	97.1026	67.5105
gene-BW25113_0060	polB	CP009273.1	-	63429	65780	89.7534	20.8891	14.5231
gene-BW25113_0061	araD	CP009273.1	-	65855	66532	3.11357	0.724647	0.50381
gene-BW25113_0064	araC	CP009273.1	+	66874	67752	143.184	33.3245	23.1688
gene-BW25113_0065	yabI	CP009273.1	+	67838	68602	97.2091	22.6243	15.7295
gene-BW25113_0066	thiQ	CP009273.1	-	68716	69414	80.1168	18.6463	12.9638
gene-BW25113_0067	thiP	CP009273.1	-	69398	71008	30.9909	7.21276	5.01466
gene-BW25113_0068	thiB	CP009273.1	-	70984	71967	76.1758	17.729	12.3261
gene-BW25113_0069	sgrR	CP009273.1	-	72131	73786	113.548	26.4269	18.3733
gene-BW25113_0070	setA	CP009273.1	+	74108	75286	63.8295	14.8556	10.3283
gene-BW25113_0071	leuD	CP009273.1	-	75335	75940	55.5198	12.9216	8.98372
gene-BW25113_0072	leuC	CP009273.1	-	75951	77351	36.6952	8.54038	5.93769
gene-BW25113_0073	leuB	CP009273.1	-	77354	78445	0.664544	0.154665	0.107531
gene-BW25113_0074	leuA	CP009273.1	-	78445	80016	30.1197	7.01001	4.8737
gene-BW25113_0075	leuL	CP009273.1	-	80109	80195	12.9655	3.01757	2.09796
gene-BW25113_0076	leuO	CP009273.1	+	80855	81799	13.5979	3.16475	2.20029
gene-BW25113_0077	ilvI	CP009273.1	+	82117	83841	56.018	13.0375	9.06433
gene-BW25113_0078	ilvH	CP009273.1	+	83844	84335	52.9614	12.3261	8.56974
gene-BW25113_0080	cra	CP009273.1	+	84515	85519	628.913	146.372	101.765
gene-BW25113_0081	mraZ	CP009273.1	+	86121	86579	1112.69	258.966	180.046
gene-BW25113_0082	rsmH	CP009273.1	+	86581	87522	731.387	170.222	118.346
gene-BW25113_0083	ftsL	CP009273.1	+	87519	87884	611.288	142.27	98.9131
gene-BW25113_0084	ftsI	CP009273.1	+	87900	89666	275.959	64.2263	44.6533
gene-BW25113_0085	murE	CP009273.1	+	89653	91140	562.932	131.016	91.0886
gene-BW25113_0086	murF	CP009273.1	+	91137	92495	559.086	130.121	90.4662
gene-BW25113_0087	mraY	CP009273.1	+	92489	93571	581.423	135.319	94.0806
gene-BW25113_0088	murD	CP009273.1	+	93574	94890	582.21	135.502	94.2079
gene-BW25113_0089	ftsW	CP009273.1	+	94890	96134	437.818	101.897	70.8438
gene-BW25113_0090	murG	CP009273.1	+	96131	97198	461.027	107.299	74.5992
gene-BW25113_0091	murC	CP009273.1	+	97252	98727	642.079	149.436	103.895
gene-BW25113_0092	ddlB	CP009273.1	+	98720	99640	982.353	228.631	158.956
gene-BW25113_0093	ftsQ	CP009273.1	+	99642	100472	759.692	176.809	122.927
gene-BW25113_0094	ftsA	CP009273.1	+	100469	101731	850.309	197.899	137.589
gene-BW25113_0095	ftsZ	CP009273.1	+	101792	102943	1616.69	376.265	261.598
gene-BW25113_0096	lpxC	CP009273.1	+	103044	103961	4367.68	1016.53	706.739
gene-BW25113_0097	secM	CP009273.1	+	104192	104704	741.189	172.503	119.933
gene-BW25113_0098	secA	CP009273.1	+	104766	107471	1066.23	248.153	172.528
gene-BW25113_0099	mutT	CP009273.1	+	107531	107920	199.328	46.3913	32.2535
gene-BW25113_0101	yacG	CP009273.1	-	108136	108333	330.813	76.9929	53.5292
gene-BW25113_0102	zapD	CP009273.1	-	108343	109086	212.614	49.4833	34.4032
gene-BW25113_0103	coaE	CP009273.1	-	109086	109706	166.531	38.7582	26.9466
gene-BW25113_0104	guaC	CP009273.1	+	109931	110974	485.325	112.954	78.5309
gene-BW25113_0106	hofC	CP009273.1	-	111009	112211	18.0179	4.19346	2.9155
gene-BW25113_0107	hofB	CP009273.1	-	112201	113586	20.058	4.66827	3.24561
gene-BW25113_0108	ppdD	CP009273.1	-	113596	114036	5.30612	1.23494	0.858589
gene-BW25113_0109	nadC	CP009273.1	-	114239	115132	323.886	75.3807	52.4083
gene-BW25113_0110	ampD	CP009273.1	+	115220	115771	224.205	52.181	36.2788
gene-BW25113_0111	ampE	CP009273.1	+	115768	116622	160.745	37.4115	26.0103
gene-BW25113_0112	aroP	CP009273.1	-	116665	118038	101.06	23.5205	16.3526
gene-BW25113_0113	pdhR	CP009273.1	+	118579	119343	1835.45	427.18	296.996
gene-BW25113_0114	aceE	CP009273.1	+	119504	122167	16134.7	3755.16	2610.77
gene-BW25113_0115	aceF	CP009273.1	+	122182	124074	14976.3	3485.55	2423.33
gene-BW25113_0116	lpd	CP009273.1	+	124399	125823	11042.5	2570.01	1786.8
gene-BW25113_0117	yacH	CP009273.1	-	125894	127747	27.2896	6.35135	4.41577
gene-BW25113_0118	acnB	CP009273.1	+	128102	130699	1911.33	444.841	309.275
gene-BW25113_0119	yacL	CP009273.1	+	130875	131237	648.526	150.937	104.939
gene-BW25113_0120	speD	CP009273.1	-	131275	132069	2063.35	480.222	333.874
gene-BW25113_0121	speE	CP009273.1	-	132085	132951	1762.58	410.221	285.205
gene-BW25113_0122	yacC	CP009273.1	-	133057	133404	488.813	113.766	79.0954
gene-BW25113_0123	cueO	CP009273.1	+	133570	135120	63.1728	14.7027	10.2221
gene-BW25113_0124	gcd	CP009273.1	-	135322	137712	297.871	69.326	48.1988
gene-BW25113_0125	hpt	CP009273.1	+	137918	138454	1777.05	413.588	287.546
gene-BW25113_0126	can	CP009273.1	-	138495	139157	1811.48	421.601	293.118
gene-BW25113_0127	yadG	CP009273.1	+	139266	140192	376.064	87.5245	60.8513
gene-BW25113_0128	yadH	CP009273.1	+	140189	140959	318.875	74.2144	51.5975
gene-BW25113_0129	yadI	CP009273.1	+	141064	141504	277.816	64.6585	44.9537
gene-BW25113_0130	yadE	CP009273.1	+	141568	142797	71.7049	16.6885	11.6026
gene-BW25113_0131	panD	CP009273.1	-	142801	143181	1489.28	346.611	240.981
gene-BW25113_0132	yadD	CP009273.1	+	143455	144357	80.289	18.6863	12.9917
gene-BW25113_0133	panC	CP009273.1	-	144431	145282	1038.51	241.701	168.042
gene-BW25113_0134	panB	CP009273.1	-	145294	146088	801.533	186.547	129.697
gene-BW25113_0135	yadC	CP009273.1	-	146202	147440	8.53995	1.98757	1.38186
gene-BW25113_0136	yadK	CP009273.1	-	147490	148086	8.41541	1.95859	1.36171
gene-BW25113_0137	yadL	CP009273.1	-	148113	148718	7.63861	1.7778	1.23601
gene-BW25113_0138	yadM	CP009273.1	-	148730	149299	6.00351	1.39725	0.971434
gene-BW25113_0139	htrE	CP009273.1	-	149316	151913	6.61509	1.53958	1.07039
gene-BW25113_0140	yadV	CP009273.1	-	151948	152688	7.56545	1.76077	1.22417
gene-BW25113_0141	yadN	CP009273.1	-	152786	153370	8.12308	1.89055	1.3144
gene-BW25113_0142	folK	CP009273.1	-	153740	154219	131.087	30.5091	21.2114
gene-BW25113_0143	pcnB	CP009273.1	-	154216	155613	527.114	122.68	85.2928
gene-BW25113_0144	gluQ	CP009273.1	-	155673	156599	78.0831	18.1729	12.6347
gene-BW25113_0145	dksA	CP009273.1	-	156636	157091	7782.11	1811.19	1259.23
gene-BW25113_0146	sfsA	CP009273.1	-	157269	157973	445.915	103.781	72.1539
gene-BW25113_0147	ligT	CP009273.1	-	157988	158518	110.356	25.6841	17.8568
gene-BW25113_0148	hrpB	CP009273.1	+	158592	161021	120.981	28.1568	19.576
gene-BW25113_0149	mrcB	CP009273.1	+	161217	163751	239.12	55.6524	38.6922
gene-BW25113_0150	fhuA	CP009273.1	+	163971	166214	1945.98	452.905	314.882
gene-BW25113_0151	fhuC	CP009273.1	+	166265	167062	414.244	96.4105	67.0293
gene-BW25113_0152	fhuD	CP009273.1	+	167062	167952	270.531	62.963	43.7749
gene-BW25113_0153	fhuB	CP009273.1	+	167949	169931	172.339	40.1098	27.8863
gene-BW25113_0154	hemL	CP009273.1	-	170089	171369	744.277	173.222	120.432
gene-BW25113_0155	clcA	CP009273.1	+	171594	173015	145.278	33.8119	23.5077
gene-BW25113_0156	erpA	CP009273.1	+	173097	173441	908.93	211.543	147.075
gene-BW25113_0157	yadS	CP009273.1	-	173488	174111	127.931	29.7745	20.7007
gene-BW25113_0158	btuF	CP009273.1	-	174149	174949	214.201	49.8527	34.66
gene-BW25113_0159	mtn	CP009273.1	-	174942	175640	1130.2	263.042	182.88
gene-BW25113_0160	dgt	CP009273.1	+	175724	177241	148.344	34.5253	24.0037
gene-BW25113_0161	degP	CP009273.1	+	177371	178795	217.109	50.5297	35.1307
gene-BW25113_0162	cdaR	CP009273.1	+	178950	180107	110.065	25.6163	17.8097
gene-BW25113_0163	yaeH	CP009273.1	-	180196	180582	567.054	131.975	91.7556
gene-BW25113_0164	yaeI	CP009273.1	-	180744	181556	65.1599	15.1652	10.5436
gene-BW25113_0166	dapD	CP009273.1	-	181610	182434	2039.31	474.626	329.983
gene-BW25113_0167	glnD	CP009273.1	-	182465	185137	117.055	27.2432	18.9408
gene-BW25113_0168	map	CP009273.1	-	185199	185993	2355.63	548.246	381.167
gene-BW25113_0169	rpsB	CP009273.1	+	186361	187086	40265.9	9371.41	6515.46
gene-BW25113_0170	tsf	CP009273.1	+	187344	188195	13350.2	3107.11	2160.22
gene-BW25113_0171	pyrH	CP009273.1	+	188342	189067	1520.47	353.872	246.029
gene-BW25113_0172	frr	CP009273.1	+	189359	189916	5581.74	1299.08	903.187
gene-BW25113_0173	dxr	CP009273.1	+	190008	191204	273.196	63.5832	44.2062
gene-BW25113_0174	ispU	CP009273.1	+	191390	192151	1040.01	242.049	168.284
gene-BW25113_0175	cdsA	CP009273.1	+	192164	193021	780.628	181.682	126.314
gene-BW25113_0176	rseP	CP009273.1	+	193033	194385	1216.82	283.2	196.895
gene-BW25113_0177	bamA	CP009273.1	+	194415	196847	2172.3	505.577	351.502
gene-BW25113_0178	skp	CP009273.1	+	196969	197454	4786.79	1114.07	774.555
gene-BW25113_0179	lpxD	CP009273.1	+	197458	198483	3243.26	754.83	524.795
gene-BW25113_0180	fabZ	CP009273.1	+	198588	199043	4378.81	1019.12	708.54
gene-BW25113_0181	lpxA	CP009273.1	+	199047	199835	4039.6	940.169	653.651
gene-BW25113_0182	lpxB	CP009273.1	+	199835	200983	512.618	119.306	82.9473
gene-BW25113_0183	rnhB	CP009273.1	+	200980	201576	349.868	81.4278	56.6126
gene-BW25113_0184	dnaE	CP009273.1	+	201613	205095	588.416	136.947	95.2122
gene-BW25113_0185	accA	CP009273.1	+	205108	206067	2110.57	491.209	341.513
gene-BW25113_0186	ldcC	CP009273.1	+	206166	208307	47.3852	11.0283	7.66744
gene-BW25113_0187	yaeR	CP009273.1	+	208364	208753	159.033	37.0131	25.7333
gene-BW25113_0188	tilS	CP009273.1	+	208818	210116	129.038	30.0322	20.8799
gene-BW25113_0189	rof	CP009273.1	-	210165	210419	544.99	126.84	88.1854
gene-BW25113_0190	yaeQ	CP009273.1	+	210778	211323	309.905	72.1268	50.146
gene-BW25113_0191	arfB	CP009273.1	+	211320	211742	249.257	58.0117	40.3326
gene-BW25113_0192	nlpE	CP009273.1	+	211756	212466	226.83	52.792	36.7036
gene-BW25113_0193	yaeF	CP009273.1	-	212666	213490	38.8182	9.03448	6.28121
gene-BW25113_0194	proS	CP009273.1	-	213544	215262	1612.7	375.337	260.953
gene-BW25113_0195	tsaA	CP009273.1	-	215374	216081	193.518	45.0391	31.3133
gene-BW25113_0196	rcsF	CP009273.1	-	216078	216482	448.472	104.377	72.5677
gene-BW25113_0197	metQ	CP009273.1	-	216600	217415	640.963	149.177	103.715
gene-BW25113_0198	metI	CP009273.1	-	217455	218108	252.86	58.8501	40.9155
gene-BW25113_0199	metN	CP009273.1	-	218101	219132	185.467	43.1652	30.0106
gene-BW25113_0200	gmhB	CP009273.1	+	219320	219895	414.29	96.4211	67.0367
gene-BW25113_0201	rrsH	CP009273.1	+	220258	221799	1452.92	338.151	235.099
gene-BW25113_0202	ileV	CP009273.1	+	221868	221944	316.134	73.5765	51.154
gene-BW25113_0203	alaV	CP009273.1	+	221987	222062	196.401	45.7101	31.7799
gene-BW25113_0204	rrlH	CP009273.1	+	222246	225149	4721.22	1098.81	763.945
gene-BW25113_0205	rrfH	CP009273.1	+	225243	225362	34.8336	8.10712	5.63646
gene-BW25113_0206	aspU	CP009273.1	+	225415	225491	4.68831	1.09115	0.758621
gene-BW25113_0207	dkgB	CP009273.1	+	225654	226457	65.8918	15.3355	10.662
gene-BW25113_0208	yafC	CP009273.1	-	226454	227368	139.874	32.5541	22.6332
gene-BW25113_0209	yafD	CP009273.1	+	227609	228409	351.463	81.7989	56.8706
gene-BW25113_0210	yafE	CP009273.1	+	228413	229036	82.234	19.139	13.3064
gene-BW25113_0211	mltD	CP009273.1	-	229084	230442	312.241	72.6705	50.5241
gene-BW25113_0212	gloB	CP009273.1	-	230514	231269	99.6614	23.195	16.1263
gene-BW25113_0213	yafS	CP009273.1	+	231303	232025	199.632	46.462	32.3027
gene-BW25113_0214	rnhA	CP009273.1	-	232022	232489	338.562	78.7963	54.7831
gene-BW25113_0215	dnaQ	CP009273.1	+	232554	233285	243.141	56.5882	39.3428
gene-BW25113_0216	aspV	CP009273.1	+	233418	233494	57.3636	13.3507	9.28207
gene-BW25113_0217	yafT	CP009273.1	+	233822	234607	23.3537	5.4353	3.77888
gene-BW25113_0218	yafU	CP009273.1	-	235233	235589	7.02521	1.63504	1.13676
gene-BW25113_0219	yafV	CP009273.1	-	235906	236676	189.001	43.9878	30.5825
gene-BW25113_0220	ivy	CP009273.1	+	236830	237303	177.46	41.3017	28.715
gene-BW25113_0221	fadE	CP009273.1	-	237346	239790	16.2389	3.7794	2.62763
gene-BW25113_0222	gmhA	CP009273.1	+	240030	240608	1222.27	284.469	197.777
gene-BW25113_0223	yafJ	CP009273.1	+	240814	241581	375.307	87.3483	60.7288
gene-BW25113_0224	yafK	CP009273.1	-	241552	242292	315.81	73.5012	51.1016
gene-BW25113_0225	yafQ	CP009273.1	-	242448	242726	149.699	34.8407	24.2229
gene-BW25113_0226	dinJ	CP009273.1	-	242729	242989	336.648	78.3508	54.4733
gene-BW25113_0227	yafL	CP009273.1	+	243199	243948	7.89067	1.83646	1.2768
gene-BW25113_0228	rayT	CP009273.1	+	244124	244621	72.7289	16.9268	11.7683
gene-BW25113_0229	lfhA	CP009273.1	-	244845	246557	8.59778	2.00103	1.39122
gene-BW25113_0230	lafU	CP009273.1	+	246559	247314	8.59524	2.00044	1.3908
gene-BW25113_0231	dinB	CP009273.1	+	247385	248440	50.0549	11.6497	8.09944
gene-BW25113_0232	yafN	CP009273.1	+	248492	248785	93.3367	21.723	15.1029
gene-BW25113_0233	yafO	CP009273.1	+	248788	249186	63.6792	14.8206	10.304
gene-BW25113_0234	yafP	CP009273.1	+	249196	249648	15.7594	3.66781	2.55004
gene-BW25113_0235	ykfJ	CP009273.1	+	249966	250172	2.49758	0.581284	0.404137
gene-BW25113_0236	prfH	CP009273.1	+	250189	250689	32.0599	7.46156	5.18764
gene-BW25113_0237	pepD	CP009273.1	-	250746	252203	1875.55	436.513	303.485
gene-BW25113_0238	gpt	CP009273.1	+	252464	252922	460.192	107.104	74.4641
gene-BW25113_0239	frsA	CP009273.1	+	253014	254258	198.886	46.2884	32.1819
gene-BW25113_0240	crl	CP009273.1	+	254316	254717	1625.48	378.312	263.021
gene-BW25113_0241	phoE	CP009273.1	-	254756	255811	21.3041	4.95827	3.44723
gene-BW25113_0242	proB	CP009273.1	+	256099	257202	604.618	140.718	97.8338
gene-BW25113_0243	proA	CP009273.1	+	257214	258467	565.179	131.539	91.4523
gene-BW25113_0244	thrW	CP009273.1	+	258582	258657	184.671	42.98	29.8818
gene-BW25113_0245	ykfI	CP009273.1	-	259039	259380	95.4591	22.217	15.4463
gene-BW25113_0246	yafW	CP009273.1	-	259401	259718	62.9686	14.6552	10.189
gene-BW25113_0247	ykfG	CP009273.1	-	259967	260443	34.5891	8.05021	5.5969
gene-BW25113_0248	yafX	CP009273.1	-	260459	260917	74.3072	17.2941	12.0237
gene-BW25113_0249	ykfF	CP009273.1	-	261015	261254	101.867	23.7083	16.4831
gene-BW25113_0250	ykfB	CP009273.1	-	261331	261798	124.263	28.9207	20.1071
gene-BW25113_0251	yafY	CP009273.1	-	261821	262264	54.5562	12.6973	8.82779
gene-BW25113_0252	yafZ	CP009273.1	-	262895	263716	16.7993	3.90983	2.71831
gene-BW25113_0253	ykfA	CP009273.1	-	263808	264671	37.0463	8.62209	5.9945
gene-BW25113_0254	perR	CP009273.1	-	265000	265893	27.16	6.32116	4.39478
gene-BW25113_0256	insI1	CP009273.1	+	266314	267465	127.224	29.6098	20.5862
gene-BW25113_0258	ykfC	CP009273.1	+	268558	269665	32.6995	7.61042	5.29113
gene-BW25113_0259	insH1	CP009273.1	-	269812	270828	467.861	108.889	75.7051
gene-BW25113_0260	mmuP	CP009273.1	+	271036	272439	14.0403	3.26771	2.27187
gene-BW25113_0261	mmuM	CP009273.1	+	272426	273358	119.588	27.8327	19.3506
gene-BW25113_0262	afuC	CP009273.1	-	273467	274513	12.7154	2.95935	2.05749
gene-BW25113_0263	afuB	CP009273.1	-	274525	274872	9.31609	2.16821	1.50745
gene-BW25113_0264	insB1	CP009273.1	-	274889	275392	47.7312	11.1089	7.72343
gene-BW25113_0265	insA	CP009273.1	-	275311	275586	52.0079	12.1042	8.41545
gene-BW25113_0266	yagB	CP009273.1	-	276138	276446	79.5275	18.5091	12.8684
gene-BW25113_0267	yagA	CP009273.1	-	276540	277694	2.98182	0.693983	0.482491
gene-BW25113_0268	yagE	CP009273.1	+	277989	278897	372.387	86.6688	60.2564
gene-BW25113_0269	yagF	CP009273.1	+	278912	280879	216.615	50.4146	35.0507
gene-BW25113_0270	yagG	CP009273.1	+	281106	282488	14.8749	3.46196	2.40692
gene-BW25113_0271	yagH	CP009273.1	+	282500	284110	19.1415	4.45497	3.09731
gene-BW25113_0272	yagI	CP009273.1	-	284115	284873	104.962	24.4286	16.984
gene-BW25113_0273	argF	CP009273.1	-	285012	286016	34.6119	8.05552	5.60059
gene-BW25113_0274	insB1	CP009273.1	-	286360	286863	67.5842	15.7294	10.9359
gene-BW25113_0275	insA	CP009273.1	-	286782	287057	41.9499	9.76336	6.78796
gene-BW25113_0276	yagJ	CP009273.1	+	287115	287942	62.7899	14.6136	10.1601
gene-BW25113_0277	yagK	CP009273.1	-	288033	288659	31.9809	7.44317	5.17486
gene-BW25113_0278	yagL	CP009273.1	-	288931	289629	15.0315	3.4984	2.43226
gene-BW25113_0279	yagM	CP009273.1	-	289656	290510	9.5462	2.22177	1.54468
gene-BW25113_0280	yagN	CP009273.1	-	290850	291290	434.524	101.13	70.3107
gene-BW25113_0281	intF	CP009273.1	-	291407	292807	102.845	23.936	16.6415
gene-BW25113_0283	paoD	CP009273.1	-	293481	294437	9.39966	2.18766	1.52097
gene-BW25113_0284	paoC	CP009273.1	-	294447	296645	6.69304	1.55773	1.08301
gene-BW25113_0285	paoB	CP009273.1	-	296642	297598	5.15533	1.19984	0.834189
gene-BW25113_0286	paoA	CP009273.1	-	297595	298284	8.15413	1.89778	1.31943
gene-BW25113_0287	yagU	CP009273.1	+	298702	299316	457.659	106.515	74.0542
gene-BW25113_0288	ykgJ	CP009273.1	-	299564	299893	29.697	6.91162	4.8053
gene-BW25113_0289	ecpE	CP009273.1	-	300206	300916	20.0127	4.65771	3.23827
gene-BW25113_0290	ecpD	CP009273.1	-	300885	302528	19.0776	4.4401	3.08697
gene-BW25113_0291	ecpC	CP009273.1	-	302518	305043	7.75904	1.80583	1.2555
gene-BW25113_0292	ecpB	CP009273.1	-	305069	305737	5.86398	1.36477	0.948856
gene-BW25113_0293	ecpA	CP009273.1	-	305795	306382	32.9898	7.67799	5.33811
gene-BW25113_0294	ecpR	CP009273.1	-	306457	307047	4.23181	0.984905	0.684754
gene-BW25113_0295	ykgL	CP009273.1	+	307823	308050	41.8728	9.74541	6.77548
gene-BW25113_0296	ykgM	CP009273.1	-	308225	308488	52.8205	12.2934	8.54694
gene-BW25113_0297	eaeH	CP009273.1	+	310068	310939	1.64794	0.383538	0.266654
gene-BW25113_0298	insE1	CP009273.1	+	311002	311301	42.2814	9.8405	6.8416
gene-BW25113_0299	insF1	CP009273.1	+	311298	312164	33.0199	7.685	5.34299
gene-BW25113_0300	ykgA	CP009273.1	-	312197	312880	27.6491	6.43501	4.47393
gene-BW25113_0301	rclC	CP009273.1	-	313437	314030	5.06566	1.17897	0.819679
gene-BW25113_0303	rclB	CP009273.1	-	314042	314278	9.14768	2.12901	1.48019
gene-BW25113_0304	rclA	CP009273.1	-	314387	315712	3.74736	0.872154	0.606364
gene-BW25113_0305	rclR	CP009273.1	+	315938	316792	13.0585	3.03921	2.11301
gene-BW25113_0306	ykgE	CP009273.1	+	317319	318038	420.95	97.9712	68.1143
gene-BW25113_0307	ykgF	CP009273.1	+	318049	319476	185.157	43.093	29.9604
gene-BW25113_0308	ykgG	CP009273.1	+	319469	320164	80.5294	18.7423	13.0306
gene-BW25113_0310	ykgH	CP009273.1	-	320407	321075	4.47384	1.04123	0.723917
gene-BW25113_0311	betA	CP009273.1	-	321288	322958	150.628	35.057	24.3733
gene-BW25113_0312	betB	CP009273.1	-	322972	324444	213.089	49.594	34.4801
gene-BW25113_0313	betI	CP009273.1	-	324458	325045	273.588	63.6745	44.2696
gene-BW25113_0314	betT	CP009273.1	+	325174	327207	97.4469	22.6796	15.768
gene-BW25113_0315	yahA	CP009273.1	+	328082	329170	36.4004	8.47176	5.88998
gene-BW25113_0316	yahB	CP009273.1	-	329212	330144	86.3923	20.1068	13.9792
gene-BW25113_0317	yahC	CP009273.1	-	330236	330733	5.7249	1.3324	0.926352
gene-BW25113_0318	yahD	CP009273.1	+	330991	331596	26.6568	6.20405	4.31336
gene-BW25113_0319	yahE	CP009273.1	+	331636	332499	5.91377	1.37636	0.956914
gene-BW25113_0320	yahF	CP009273.1	+	332489	334036	1.10856	0.258004	0.179377
gene-BW25113_0321	yahG	CP009273.1	+	334036	335454	5.92939	1.38	0.95944
gene-BW25113_0323	yahI	CP009273.1	+	335876	336826	8.32387	1.93728	1.34689
gene-BW25113_0324	yahJ	CP009273.1	+	336836	338218	37.7035	8.77506	6.10085
gene-BW25113_0325	yahK	CP009273.1	+	338595	339644	27.1524	6.3194	4.39356
gene-BW25113_0326	yahL	CP009273.1	+	339887	340702	2.3652	0.550472	0.382715
gene-BW25113_0327	yahM	CP009273.1	+	341115	341360	70.9106	16.5036	11.4741
gene-BW25113_0328	yahN	CP009273.1	-	341377	342048	100.21	23.3227	16.2151
gene-BW25113_0329	yahO	CP009273.1	+	342195	342470	54.3877	12.6581	8.80053
gene-BW25113_0330	prpR	CP009273.1	-	342568	344154	4.79836	1.11676	0.776428
gene-BW25113_0331	prpB	CP009273.1	+	344393	345283	9.70819	2.25947	1.57089
gene-BW25113_0333	prpC	CP009273.1	+	345723	346892	3.67949	0.856358	0.595382
gene-BW25113_0334	prpD	CP009273.1	+	346926	348377	2.97039	0.691323	0.480641
gene-BW25113_0335	prpE	CP009273.1	+	348417	350303	7.6868	1.78901	1.24381
gene-BW25113_0336	codB	CP009273.1	+	350633	351892	32.2723	7.51099	5.22201
gene-BW25113_0337	codA	CP009273.1	+	351882	353165	107.896	25.1116	17.4588
gene-BW25113_0338	cynR	CP009273.1	-	353502	354401	30.3389	7.06102	4.90917
gene-BW25113_0339	cynT	CP009273.1	+	354510	355169	10.9242	2.54249	1.76766
gene-BW25113_0340	cynS	CP009273.1	+	355200	355670	9.29512	2.16333	1.50405
gene-BW25113_0341	cynX	CP009273.1	+	355703	356857	7.13247	1.66	1.15411
gene-BW25113_0342	lacA	CP009273.1	-	356960	357571	5.80229	1.35041	0.938874
gene-BW25113_0343	lacY	CP009273.1	-	357637	358890	3.92185	0.912765	0.634599
gene-BW25113_0344	lacZ	CP009273.1	-	358942	360066	3.80978	0.886681	0.616464
gene-BW25113_0345	lacI	CP009273.1	-	360661	361743	117.962	27.4543	19.0876
gene-BW25113_0346	mhpR	CP009273.1	-	361820	362653	19.988	4.65198	3.23428
gene-BW25113_0347	mhpA	CP009273.1	+	362844	364508	3.9976	0.930394	0.646855
gene-BW25113_0348	mhpB	CP009273.1	+	364510	365454	3.14497	0.731956	0.508891
gene-BW25113_0349	mhpC	CP009273.1	+	365457	367561	65.8847	15.3339	10.6609
gene-BW25113_0350	mhpD	CP009273.1	+	367571	368380	110.712	25.7669	17.9144
gene-BW25113_0351	mhpF	CP009273.1	+	368377	369327	77.243	17.9774	12.4988
gene-BW25113_0352	mhpE	CP009273.1	+	369324	370337	68.4705	15.9357	11.0793
gene-BW25113_0353	mhpT	CP009273.1	+	370915	372126	23.1353	5.38447	3.74355
gene-BW25113_0354	yaiL	CP009273.1	+	372228	372767	415.648	96.7372	67.2565
gene-BW25113_0355	frmB	CP009273.1	-	372991	373824	375.359	87.3603	60.7371
gene-BW25113_0356	frmA	CP009273.1	-	373918	375027	658.749	153.316	106.593
gene-BW25113_0357	frmR	CP009273.1	-	375062	375337	740.641	172.376	119.844
gene-BW25113_0358	yaiO	CP009273.1	-	375525	376298	13.0181	3.02981	2.10647
gene-BW25113_0360	insC1	CP009273.1	+	376807	377172	108.631	25.2827	17.5777
gene-BW25113_0361	insD1	CP009273.1	+	377130	378035	62.8814	14.6349	10.1749
gene-BW25113_0363	yaiP	CP009273.1	-	378195	379391	5.34177	1.24324	0.864358
gene-BW25113_0364	yaiS	CP009273.1	-	379515	380072	0.966914	0.225038	0.156457
gene-BW25113_0365	tauA	CP009273.1	+	380688	381650	2.88577	0.67163	0.46695
gene-BW25113_0366	tauB	CP009273.1	+	381663	382430	2.96615	0.690336	0.479955
gene-BW25113_0367	tauC	CP009273.1	+	382427	383254	3.09903	0.721264	0.501458
gene-BW25113_0368	tauD	CP009273.1	+	383251	384102	20.7535	4.83014	3.35815
gene-BW25113_0369	hemB	CP009273.1	-	384209	385183	615.911	143.346	99.6611
gene-BW25113_0372	insF1	CP009273.1	-	387195	388061	45.3512	10.555	7.33833
gene-BW25113_0373	insE1	CP009273.1	-	388058	388357	90.3614	21.0305	14.6215
gene-BW25113_0375	yaiV	CP009273.1	+	389962	390585	9.59135	2.23227	1.55199
gene-BW25113_0376	ampH	CP009273.1	-	390586	391743	116.284	27.0638	18.8161
gene-BW25113_0377	sbmA	CP009273.1	+	392095	393315	68.0598	15.8401	11.0128
gene-BW25113_0378	yaiW	CP009273.1	+	393328	394422	112.924	26.2818	18.2724
gene-BW25113_0379	yaiY	CP009273.1	-	394481	394789	18.8803	4.39416	3.05503
gene-BW25113_0380	yaiZ	CP009273.1	+	395049	395261	328.653	76.49	53.1796
gene-BW25113_0381	ddlA	CP009273.1	-	395285	396379	700.875	163.12	113.409
gene-BW25113_0382	iraP	CP009273.1	+	396842	397102	167.257	38.927	27.064
gene-BW25113_0383	phoA	CP009273.1	+	397203	398618	33.161	7.71784	5.36582
gene-BW25113_0384	psiF	CP009273.1	+	398737	399057	30.3178	7.0561	4.90575
gene-BW25113_0385	yaiC	CP009273.1	+	399159	400274	16.638	3.8723	2.69221
gene-BW25113_0386	proC	CP009273.1	-	400291	401100	341.701	79.527	55.291
gene-BW25113_0387	yaiI	CP009273.1	+	401220	401678	225.161	52.4036	36.4336
gene-BW25113_0388	aroL	CP009273.1	+	401861	402385	284.478	66.2089	46.0317
gene-BW25113_0389	yaiA	CP009273.1	+	402435	402626	326.047	75.8836	52.758
gene-BW25113_0390	aroM	CP009273.1	+	402884	403561	92.0988	21.4349	14.9026
gene-BW25113_0391	yaiE	CP009273.1	+	403633	403917	1185.92	276.009	191.895
gene-BW25113_0392	ykiA	CP009273.1	+	404065	404406	63.3421	14.7421	10.2495
gene-BW25113_0393	rdgC	CP009273.1	-	404564	405475	424.325	98.7566	68.6604
gene-BW25113_0394	mak	CP009273.1	+	405600	406508	139.284	32.4167	22.5377
gene-BW25113_0396	araJ	CP009273.1	-	406753	407937	41.0954	9.56447	6.64968
gene-BW25113_0397	sbcC	CP009273.1	-	408063	411209	84.4055	19.6444	13.6577
gene-BW25113_0398	sbcD	CP009273.1	-	411206	412408	92.463	21.5197	14.9615
gene-BW25113_0399	phoB	CP009273.1	+	412598	413287	81.9464	19.0721	13.2598
gene-BW25113_0400	phoR	CP009273.1	+	413345	414640	38.3117	8.91661	6.19926
gene-BW25113_0401	brnQ	CP009273.1	+	415047	416366	202.107	47.038	32.7031
gene-BW25113_0402	proY	CP009273.1	+	416442	417815	200.087	46.568	32.3763
gene-BW25113_0403	malZ	CP009273.1	+	417974	419788	53.638	12.4836	8.67922
gene-BW25113_0404	acpH	CP009273.1	-	419793	420374	55.878	13.005	9.04168
gene-BW25113_0405	queA	CP009273.1	+	420467	421537	276.464	64.3438	44.7349
gene-BW25113_0406	tgt	CP009273.1	+	421593	422720	1371.68	319.242	221.953
gene-BW25113_0407	yajC	CP009273.1	+	422743	423075	4032.73	938.571	652.54
gene-BW25113_0408	secD	CP009273.1	+	423103	424950	1594.51	371.103	258.009
gene-BW25113_0409	secF	CP009273.1	+	424961	425932	1679.83	390.961	271.815
gene-BW25113_0410	yajD	CP009273.1	+	426061	426408	293.345	68.2726	47.4664
gene-BW25113_0411	tsx	CP009273.1	-	426585	427469	6689	1556.79	1082.35
gene-BW25113_0412	yajI	CP009273.1	-	427768	428307	35.6667	8.301	5.77126
gene-BW25113_0413	nrdR	CP009273.1	+	428458	428907	803.211	186.938	129.968
gene-BW25113_0414	ribD	CP009273.1	+	428911	430014	539.605	125.587	87.3141
gene-BW25113_0415	ribE	CP009273.1	+	430103	430573	1711.42	398.314	276.927
gene-BW25113_0416	nusB	CP009273.1	+	430593	431012	2100.99	488.98	339.963
gene-BW25113_0417	thiL	CP009273.1	+	431090	432067	208.088	48.4301	33.671
gene-BW25113_0418	pgpA	CP009273.1	+	432045	432563	707.088	164.566	114.415
gene-BW25113_0419	yajO	CP009273.1	-	432617	433591	225.165	52.4046	36.4342
gene-BW25113_0420	dxs	CP009273.1	-	433771	435633	420.466	97.8585	68.036
gene-BW25113_0421	ispA	CP009273.1	-	435658	436557	599.333	139.488	96.9787
gene-BW25113_0422	xseB	CP009273.1	-	436557	436799	717.753	167.049	116.14
gene-BW25113_0423	thiI	CP009273.1	+	437005	438453	458.959	106.817	74.2647
gene-BW25113_0424	yajL	CP009273.1	-	438507	439097	225.688	52.5262	36.5188
gene-BW25113_0425	panE	CP009273.1	-	439060	439971	240.525	55.9793	38.9195
gene-BW25113_0426	yajQ	CP009273.1	+	440139	440630	1625.92	378.414	263.092
gene-BW25113_0427	yajR	CP009273.1	-	440758	442122	75.5062	17.5732	12.2177
gene-BW25113_0428	cyoE	CP009273.1	-	442271	443161	8782.57	2044.04	1421.12
gene-BW25113_0429	cyoD	CP009273.1	-	443173	443502	10041.7	2337.08	1624.85
gene-BW25113_0430	cyoC	CP009273.1	-	443502	444116	8203.64	1909.3	1327.44
gene-BW25113_0431	cyoB	CP009273.1	-	444106	446097	8030.24	1868.95	1299.38
gene-BW25113_0432	cyoA	CP009273.1	-	446119	447066	10156.6	2363.84	1643.46
gene-BW25113_0433	ampG	CP009273.1	-	447526	449001	218.158	50.7737	35.3003
gene-BW25113_0434	yajG	CP009273.1	-	449045	449623	1107.9	257.85	179.27
gene-BW25113_0435	bolA	CP009273.1	+	449928	450245	585.748	136.326	94.7805
gene-BW25113_0436	tig	CP009273.1	+	450589	451887	13097.5	3048.29	2119.32
gene-BW25113_0437	clpP	CP009273.1	+	452133	452756	2727.44	634.78	441.33
gene-BW25113_0438	clpX	CP009273.1	+	452882	454156	2978.55	693.223	481.963
gene-BW25113_0439	lon	CP009273.1	+	454344	456698	3311.67	770.752	535.864
gene-BW25113_0440	hupB	CP009273.1	+	456907	457179	9655.89	2247.3	1562.43
gene-BW25113_0441	ppiD	CP009273.1	+	457371	459242	1152.43	268.215	186.476
gene-BW25113_0442	ybaV	CP009273.1	+	459393	459764	67.4086	15.6886	10.9075
gene-BW25113_0443	fadM	CP009273.1	+	459858	460256	22.4511	5.22524	3.63284
gene-BW25113_0444	queC	CP009273.1	-	460308	461003	378.928	88.1911	61.3148
gene-BW25113_0445	ybaE	CP009273.1	-	461068	462768	101.157	23.5431	16.3683
gene-BW25113_0446	cof	CP009273.1	+	462868	463686	99.1013	23.0647	16.0357
gene-BW25113_0447	ybaO	CP009273.1	+	463839	464297	167.314	38.9403	27.0732
gene-BW25113_0448	mdlA	CP009273.1	+	464327	466099	63.1235	14.6912	10.2141
gene-BW25113_0449	mdlB	CP009273.1	+	466092	467873	48.119	11.1991	7.78619
gene-BW25113_0450	glnK	CP009273.1	+	468054	468392	5.52212	1.28521	0.893541
gene-BW25113_0451	amtB	CP009273.1	+	468422	469708	28.7723	6.69642	4.65568
gene-BW25113_0452	tesB	CP009273.1	-	469757	470617	187.352	43.604	30.3156
gene-BW25113_0453	ybaY	CP009273.1	+	470835	471407	126.37	29.4111	20.4481
gene-BW25113_0454	ybaZ	CP009273.1	-	471438	471827	81.959	19.075	13.2619
gene-BW25113_0455	ffs	CP009273.1	+	471904	472017	23.9737	5.57959	3.87921
gene-BW25113_0456	ybaA	CP009273.1	+	472128	472481	44.4209	10.3384	7.18779
gene-BW25113_0457	ylaB	CP009273.1	-	472523	474073	74.352	17.3046	12.031
gene-BW25113_0458	ylaC	CP009273.1	-	474237	474707	744.091	173.179	120.402
gene-BW25113_0459	maa	CP009273.1	-	474823	475374	231.924	53.9776	37.5278
gene-BW25113_0460	hha	CP009273.1	-	475546	475764	808.274	188.116	130.788
gene-BW25113_0461	tomB	CP009273.1	-	475790	476164	290.392	67.5853	46.9886
gene-BW25113_0462	acrB	CP009273.1	-	476710	479859	1067.88	248.537	172.795
gene-BW25113_0463	acrA	CP009273.1	-	479882	481075	933.628	217.291	151.071
gene-BW25113_0464	acrR	CP009273.1	+	481217	481864	212.224	49.3926	34.3401
gene-BW25113_0465	mscK	CP009273.1	+	481992	485354	146.413	34.0758	23.6912
gene-BW25113_0466	ybaM	CP009273.1	-	485566	485727	128.444	29.8939	20.7837
gene-BW25113_0467	priC	CP009273.1	-	485741	486268	82.4299	19.1846	13.3381
gene-BW25113_0468	ybaN	CP009273.1	+	486338	486715	361.595	84.1571	58.5101
gene-BW25113_0469	apt	CP009273.1	+	486868	487419	1087.37	253.072	175.948
gene-BW25113_0470	dnaX	CP009273.1	+	487548	489479	468.853	109.12	75.8656
gene-BW25113_0471	ybaB	CP009273.1	+	489532	489861	0.909264	0.211621	0.147129
gene-BW25113_0472	recR	CP009273.1	+	489861	490466	1488.32	346.389	240.827
gene-BW25113_0473	htpG	CP009273.1	+	490576	492450	2226.12	518.103	360.211
gene-BW25113_0474	adk	CP009273.1	+	492631	493275	1963.51	456.983	317.717
gene-BW25113_0475	hemH	CP009273.1	+	493511	494473	130.353	30.3381	21.0926
gene-BW25113_0476	aes	CP009273.1	-	494470	495429	29.7125	6.91524	4.80781
gene-BW25113_0477	gsk	CP009273.1	+	495581	496885	200.29	46.6151	32.4091
gene-BW25113_0478	ybaL	CP009273.1	-	497018	498694	306.522	71.3394	49.5986
gene-BW25113_0479	fsr	CP009273.1	-	498932	500152	74.5012	17.3393	12.0551
gene-BW25113_0480	ushA	CP009273.1	+	500370	502022	180.742	42.0655	29.246
gene-BW25113_0481	ybaK	CP009273.1	-	502059	502538	147.181	34.2547	23.8155
gene-BW25113_0482	ybaP	CP009273.1	-	502742	503536	202.562	47.144	32.7768
gene-BW25113_0483	ybaQ	CP009273.1	+	503674	504015	673.81	156.821	109.03
gene-BW25113_0484	copA	CP009273.1	-	504331	506835	67.1381	15.6256	10.8637
gene-BW25113_0485	glsA	CP009273.1	+	507097	508029	11.6667	2.71528	1.88779
gene-BW25113_0486	ybaT	CP009273.1	+	508032	509324	12.662	2.94694	2.04886
gene-BW25113_0487	cueR	CP009273.1	+	509449	509856	144.086	33.5343	23.3147
gene-BW25113_0488	ybbJ	CP009273.1	-	509857	510315	122.756	28.5699	19.8632
gene-BW25113_0489	qmcA	CP009273.1	-	510312	511229	144.887	33.7207	23.4443
gene-BW25113_0490	fetA	CP009273.1	+	511375	512052	143.893	33.4893	23.2834
gene-BW25113_0491	fetB	CP009273.1	+	512039	512818	105.156	24.4739	17.0154
gene-BW25113_0492	ybbN	CP009273.1	-	512881	513735	731.179	170.173	118.313
gene-BW25113_0493	ybbO	CP009273.1	-	513796	514605	228.483	53.1769	36.9711
gene-BW25113_0494	tesA	CP009273.1	-	514595	515221	204.174	47.5192	33.0377
gene-BW25113_0495	ybbA	CP009273.1	+	515189	515875	58.6688	13.6545	9.49327
gene-BW25113_0496	ybbP	CP009273.1	+	515872	518286	25.4184	5.91584	4.11298
gene-BW25113_0497	rhsD	CP009273.1	+	518717	522997	11.0475	2.57118	1.78761
gene-BW25113_0498	ybbC	CP009273.1	+	523037	523405	21.0217	4.89255	3.40154
gene-BW25113_0499	rhsH	CP009273.1	+	523408	524115	14.2341	3.31283	2.30324
gene-BW25113_0501	ybbD	CP009273.1	+	524096	524586	5.05752	1.17708	0.818362
gene-BW25113_0502	ylbG	CP009273.1	-	525051	525472	49.6635	11.5586	8.0361
gene-BW25113_0503	mnmH	CP009273.1	-	525588	526682	85.6575	19.9358	13.8603
gene-BW25113_0504	allS	CP009273.1	-	526751	527677	8.05825	1.87546	1.30391
gene-BW25113_0505	allA	CP009273.1	+	527907	528389	35.5507	8.27401	5.7525
gene-BW25113_0506	allR	CP009273.1	+	528467	529282	416.277	96.8836	67.3582
gene-BW25113_0507	gcl	CP009273.1	+	529372	531153	7.21212	1.67854	1.167
gene-BW25113_0508	hyi	CP009273.1	+	531166	531942	4.80952	1.11936	0.778234
gene-BW25113_0509	glxR	CP009273.1	+	532042	532920	8.45734	1.96835	1.36849
gene-BW25113_0511	ybbW	CP009273.1	+	533089	534543	1.26392	0.294162	0.204516
gene-BW25113_0512	allB	CP009273.1	+	534603	535964	6.32159	1.47128	1.0229
gene-BW25113_0513	ybbY	CP009273.1	+	536021	537322	6.58986	1.53371	1.06631
gene-BW25113_0514	glxK	CP009273.1	+	537344	538489	12.644	2.94274	2.04594
gene-BW25113_0515	allE	CP009273.1	-	538717	539502	53.7901	12.519	8.70383
gene-BW25113_0516	allC	CP009273.1	-	539513	540748	24.9595	5.80904	4.03873
gene-BW25113_0517	allD	CP009273.1	-	540770	541819	6.08286	1.41571	0.984273
gene-BW25113_0518	fdrA	CP009273.1	+	542136	543803	2.53178	0.589241	0.409669
gene-BW25113_0520	ylbF	CP009273.1	+	545083	545898	9.98775	2.32453	1.61613
gene-BW25113_0521	ybcF	CP009273.1	+	545895	546788	11.0067	2.56168	1.78101
gene-BW25113_0522	purK	CP009273.1	-	546983	548050	104.38	24.2931	16.8898
gene-BW25113_0523	purE	CP009273.1	-	548047	548556	97.7091	22.7406	15.8104
gene-BW25113_0524	lpxH	CP009273.1	-	548674	549396	463.758	107.934	75.0411
gene-BW25113_0525	ppiB	CP009273.1	-	549399	549893	3934.14	915.626	636.588
gene-BW25113_0526	cysS	CP009273.1	+	550067	551452	429.539	99.9702	69.5041
gene-BW25113_0527	ybcI	CP009273.1	-	551488	552009	23.7433	5.52597	3.84193
gene-BW25113_0528	ybcJ	CP009273.1	-	552117	552329	330.3	76.8736	53.4463
gene-BW25113_0529	folD	CP009273.1	-	552331	553197	453.979	105.658	73.4588
gene-BW25113_0530	sfmA	CP009273.1	+	553668	554210	3.17679	0.739362	0.51404
gene-BW25113_0531	sfmC	CP009273.1	+	554430	555122	3.55411	0.827178	0.575095
gene-BW25113_0532	sfmD	CP009273.1	+	555153	557756	5.32258	1.23877	0.861252
gene-BW25113_0533	sfmH	CP009273.1	+	557792	558775	1.41159	0.32853	0.22841
gene-BW25113_0534	sfmF	CP009273.1	+	558786	559301	1.8469	0.429844	0.298849
gene-BW25113_0535	sfmZ	CP009273.1	-	559304	559936	3.69194	0.859257	0.597397
gene-BW25113_0536	argU	CP009273.1	+	560179	560255	66.1169	15.3879	10.6984
gene-BW25113_0537	intD	CP009273.1	-	560271	561434	206.032	47.9516	33.3383
gene-BW25113_0539	exoD	CP009273.1	-	561554	561832	13.3548	3.10818	2.16096
gene-BW25113_0540	insE1	CP009273.1	+	562298	562597	53.1308	12.3656	8.59715
gene-BW25113_0541	insF1	CP009273.1	+	562594	563460	38.4597	8.95105	6.22321
gene-BW25113_0542	renD	CP009273.1	+	562140	563703	65.5557	15.2573	10.6076
gene-BW25113_0543	emrE	CP009273.1	+	563771	564103	105.06	24.4515	16.9999
gene-BW25113_0544	ybcK	CP009273.1	+	564358	565884	2.27636	0.529796	0.36834
gene-BW25113_0545	ybcL	CP009273.1	+	566349	566900	7.07428	1.64646	1.1447
gene-BW25113_0546	ybcM	CP009273.1	+	566910	567707	22.3672	5.2057	3.61925
gene-BW25113_0547	ybcN	CP009273.1	+	567922	568377	5.33291	1.24117	0.862924
gene-BW25113_0548	ninE	CP009273.1	+	568377	568547	4.22845	0.984122	0.68421
gene-BW25113_0549	ybcO	CP009273.1	+	568540	568830	1.63589	0.380734	0.264705
gene-BW25113_0550	rusA	CP009273.1	+	568827	569189	1.77177	0.41236	0.286693
gene-BW25113_0551	quuD	CP009273.1	+	569412	569795	11.4479	2.66437	1.8524
gene-BW25113_0552	insH1	CP009273.1	-	570193	571209	147.554	34.3415	23.8759
gene-BW25113_0553	nmpC	CP009273.1	-	569985	572281	1732.66	403.256	280.363
gene-BW25113_0554	essD	CP009273.1	+	572854	573069	14.0307	3.26548	2.27032
gene-BW25113_0555	rrrD	CP009273.1	+	573069	573566	18.7561	4.36526	3.03494
gene-BW25113_0556	rzpD	CP009273.1	+	573563	574024	24.3333	5.66328	3.93739
gene-BW25113_0557	borD	CP009273.1	-	574056	574349	345.16	80.3319	55.8507
gene-BW25113_0558	ybcV	CP009273.1	-	574640	575050	2.76156	0.64272	0.44685
gene-BW25113_0559	ybcW	CP009273.1	+	575336	575542	55.3816	12.8894	8.96136
gene-BW25113_0560	nohD	CP009273.1	+	576290	576835	10.3912	2.41844	1.68142
gene-BW25113_0561	tfaD	CP009273.1	+	577116	577553	6.08105	1.41529	0.983981
gene-BW25113_0562	ybcY	CP009273.1	-	577608	578262	23.6672	5.50826	3.82961
gene-BW25113_0563	tfaX	CP009273.1	+	578409	578591	19.3552	4.50469	3.13188
gene-BW25113_0564	appY	CP009273.1	+	579137	579886	11.272	2.62343	1.82393
gene-BW25113_0565	ompT	CP009273.1	-	580136	581089	1383.95	322.098	223.938
gene-BW25113_0566	envY	CP009273.1	-	581603	582364	9.16535	2.13313	1.48306
gene-BW25113_0567	ybcH	CP009273.1	-	582547	583437	21.3075	4.95908	3.44779
gene-BW25113_0568	nfrA	CP009273.1	-	583438	586410	37.3574	8.6945	6.04484
gene-BW25113_0569	nfrB	CP009273.1	-	586397	588634	22.4072	5.21502	3.62574
gene-BW25113_0570	cusS	CP009273.1	-	588784	590226	31.8122	7.40391	5.14756
gene-BW25113_0571	cusR	CP009273.1	-	590216	590899	71.5439	16.651	11.5766
gene-BW25113_0572	cusC	CP009273.1	+	591056	592429	2.62664	0.611319	0.425019
gene-BW25113_0573	cusF	CP009273.1	+	592587	592919	5.18318	1.20633	0.838696
gene-BW25113_0574	cusB	CP009273.1	+	592935	594158	6.74755	1.57041	1.09183
gene-BW25113_0575	cusA	CP009273.1	+	594170	597313	7.13709	1.66107	1.15486
gene-BW25113_0576	pheP	CP009273.1	+	597415	598791	229.283	53.363	37.1005
gene-BW25113_0577	ybdG	CP009273.1	-	598872	600119	208.857	48.6091	33.7954
gene-BW25113_0578	nfsB	CP009273.1	-	600227	600880	951.183	221.377	153.912
gene-BW25113_0579	ybdF	CP009273.1	-	600974	601342	109.878	25.5728	17.7795
gene-BW25113_0580	ybdJ	CP009273.1	-	601407	601655	90.0201	20.9511	14.5662
gene-BW25113_0581	ybdK	CP009273.1	-	601721	602839	17.3834	4.04578	2.81282
gene-BW25113_0582	insL1	CP009273.1	+	603521	604633	388.01	90.3048	62.7843
gene-BW25113_0583	entD	CP009273.1	-	604915	605535	68.7987	16.0121	11.1324
gene-BW25113_0584	fepA	CP009273.1	-	605710	607950	293.228	68.2454	47.4475
gene-BW25113_0585	fes	CP009273.1	+	608193	609395	315.481	73.4246	51.0483
gene-BW25113_0586	entF	CP009273.1	+	609613	613494	174.754	40.672	28.2772
gene-BW25113_0587	fepE	CP009273.1	+	613710	614843	8.23016	1.91547	1.33173
gene-BW25113_0588	fepC	CP009273.1	-	614840	615655	242.334	56.4004	39.2123
gene-BW25113_0589	fepG	CP009273.1	-	615652	616644	126.866	29.5265	20.5283
gene-BW25113_0590	fepD	CP009273.1	-	616641	617645	122.595	28.5325	19.8372
gene-BW25113_0591	entS	CP009273.1	+	617756	619006	210.482	48.9872	34.0583
gene-BW25113_0592	fepB	CP009273.1	-	619010	619966	119.453	27.8014	19.3289
gene-BW25113_0593	entC	CP009273.1	+	620341	621516	340.393	79.2224	55.0793
gene-BW25113_0594	entE	CP009273.1	+	621526	623136	373.535	86.9359	60.4421
gene-BW25113_0595	entB	CP009273.1	+	623150	624007	409.216	95.2403	66.2157
gene-BW25113_0596	entA	CP009273.1	+	624007	624753	331.364	77.121	53.6183
gene-BW25113_0597	entH	CP009273.1	+	624756	625169	328.828	76.531	53.2081
gene-BW25113_0598	cstA	CP009273.1	+	625350	627455	220.446	51.3062	35.6706
gene-BW25113_0599	ybdH	CP009273.1	-	627845	628933	48.8784	11.3759	7.90907
gene-BW25113_0600	ybdL	CP009273.1	+	629042	630202	32.236	7.50255	5.21614
gene-BW25113_0601	ybdM	CP009273.1	-	630203	630832	25.3089	5.89036	4.09527
gene-BW25113_0602	ybdN	CP009273.1	-	630805	632025	8.39424	1.95366	1.35828
gene-BW25113_0603	ybdO	CP009273.1	-	632172	633074	3.71318	0.864199	0.600833
gene-BW25113_0604	dsbG	CP009273.1	-	633283	634029	107.618	25.0469	17.4139
gene-BW25113_0605	ahpC	CP009273.1	+	634401	634964	8309.72	1933.99	1344.6
gene-BW25113_0606	ahpF	CP009273.1	+	635209	636774	650.242	151.336	105.216
gene-BW25113_0607	uspG	CP009273.1	-	636895	637323	638.007	148.489	103.237
gene-BW25113_0608	ybdR	CP009273.1	+	637544	638782	20.7885	4.83829	3.36382
gene-BW25113_0610	rnk	CP009273.1	-	639013	639423	587.207	136.666	95.0165
gene-BW25113_0611	rna	CP009273.1	-	639653	640459	357.877	83.2917	57.9085
gene-BW25113_0612	citT	CP009273.1	-	640573	642036	7.91257	1.84156	1.28034
gene-BW25113_0613	citG	CP009273.1	-	642087	642965	5.28953	1.23108	0.855905
gene-BW25113_0614	citX	CP009273.1	-	642940	643491	3.68207	0.856958	0.595799
gene-BW25113_0615	citF	CP009273.1	-	643495	645027	1.98891	0.462896	0.321828
gene-BW25113_0616	citE	CP009273.1	-	645038	645946	4.96701	1.15601	0.803716
gene-BW25113_0617	citD	CP009273.1	-	645943	646239	0.332912	0.077481	0.053869
gene-BW25113_0618	citC	CP009273.1	-	646254	647312	3.53919	0.823705	0.57268
gene-BW25113_0619	citA	CP009273.1	+	647691	649349	28.6968	6.67884	4.64345
gene-BW25113_0620	citB	CP009273.1	+	649318	649998	50.8356	11.8314	8.22576
gene-BW25113_0621	dcuC	CP009273.1	-	650039	651424	294.811	68.6138	47.7037
gene-BW25113_0622	pagP	CP009273.1	+	652013	652573	40.6239	9.45474	6.57339
gene-BW25113_0623	cspE	CP009273.1	+	652748	652957	60589.8	14101.6	9804.1
gene-BW25113_0624	flc	CP009273.1	-	653011	653394	150.659	35.0641	24.3783
gene-BW25113_0627	tatE	CP009273.1	+	654403	654606	411.319	95.7296	66.5559
gene-BW25113_0628	lipA	CP009273.1	-	654707	655672	1874.16	436.189	303.26
gene-BW25113_0629	ybeF	CP009273.1	-	655881	656834	35.283	8.21171	5.70918
gene-BW25113_0630	lipB	CP009273.1	-	657093	657734	268.396	62.4659	43.4294
gene-BW25113_0631	ybeD	CP009273.1	-	657835	658098	860.913	200.367	139.305
gene-BW25113_0632	dacA	CP009273.1	-	658208	659419	500.325	116.445	80.9581
gene-BW25113_0633	rlpA	CP009273.1	-	659558	660646	562.073	130.816	90.9495
gene-BW25113_0634	mrdB	CP009273.1	-	660657	661769	409.213	95.2395	66.2152
gene-BW25113_0635	mrdA	CP009273.1	-	661772	663673	223.094	51.9225	36.0991
gene-BW25113_0636	rlmH	CP009273.1	-	663704	664171	525.222	122.239	84.9867
gene-BW25113_0637	rsfS	CP009273.1	-	664175	664492	874.991	203.644	141.583
gene-BW25113_0638	cobC	CP009273.1	-	664752	665363	84.3578	19.6333	13.65
gene-BW25113_0639	nadD	CP009273.1	-	665387	666028	201.442	46.8834	32.5956
gene-BW25113_0640	holA	CP009273.1	-	666030	667061	0.328357	0.076421	0.053132
gene-BW25113_0641	lptE	CP009273.1	-	667061	667642	1387.11	322.833	224.449
gene-BW25113_0642	leuS	CP009273.1	-	667657	670239	1359.96	316.515	220.057
gene-BW25113_0643	ybeL	CP009273.1	+	670474	670956	218.275	50.801	35.3194
gene-BW25113_0644	ybeQ	CP009273.1	-	671026	672003	22.6677	5.27564	3.66788
gene-BW25113_0645	ybeR	CP009273.1	+	672167	672874	2.01756	0.469563	0.326463
gene-BW25113_0646	djlB	CP009273.1	+	672871	674298	1.27563	0.296888	0.206411
gene-BW25113_0647	ybeT	CP009273.1	-	674308	674862	2.40721	0.560249	0.389513
gene-BW25113_0648	ybeU	CP009273.1	+	674964	675671	6.01695	1.40037	0.973609
gene-BW25113_0649	djlC	CP009273.1	+	675668	677119	17.1439	3.99005	2.77408
gene-BW25113_0650	hscC	CP009273.1	-	677179	678849	28.9599	6.74008	4.68603
gene-BW25113_0651	rihA	CP009273.1	-	678933	679868	581.213	135.27	94.0466
gene-BW25113_0652	gltL	CP009273.1	-	679986	680711	130.563	30.3871	21.1266
gene-BW25113_0653	gltK	CP009273.1	-	680711	681385	81.4265	18.9511	13.1757
gene-BW25113_0654	gltJ	CP009273.1	-	681385	682125	57.145	13.2998	9.24669
gene-BW25113_0655	gltI	CP009273.1	-	682295	683203	255.616	59.4916	41.3615
gene-BW25113_0656	insH1	CP009273.1	-	683453	684469	118.189	27.5071	19.1243
gene-BW25113_0657	lnt	CP009273.1	-	684799	686337	220.551	51.3307	35.6876
gene-BW25113_0658	ybeX	CP009273.1	-	686362	687240	1081.74	251.762	175.038
gene-BW25113_0659	ybeY	CP009273.1	-	687330	687797	1082.01	251.824	175.08
gene-BW25113_0660	ybeZ	CP009273.1	-	687794	688834	956.04	222.507	154.698
gene-BW25113_0661	miaB	CP009273.1	-	688987	690411	530.494	123.466	85.8398
gene-BW25113_0662	ubiF	CP009273.1	+	690557	691732	219.531	51.0934	35.5226
gene-BW25113_0664	glnX	CP009273.1	-	691886	691960	1824.95	424.735	295.296
gene-BW25113_0665	glnV	CP009273.1	-	691998	692072	2764.57	643.422	447.338
gene-BW25113_0666	metU	CP009273.1	-	692120	692196	3517.61	818.682	569.188
gene-BW25113_0668	glnW	CP009273.1	-	692212	692286	6984.15	1625.48	1130.11
gene-BW25113_0670	glnU	CP009273.1	-	692321	692395	7296.78	1698.24	1180.7
gene-BW25113_0672	leuW	CP009273.1	-	692419	692503	5726.56	1332.79	926.621
gene-BW25113_0673	metT	CP009273.1	-	692513	692589	4313.89	1004.01	698.035
gene-BW25113_0674	asnB	CP009273.1	-	692969	694633	215.799	50.2248	34.9187
gene-BW25113_0675	umpH	CP009273.1	-	695030	695782	497.778	115.852	80.546
gene-BW25113_0676	nagC	CP009273.1	-	695830	697050	404.533	94.1504	65.4579
gene-BW25113_0677	nagA	CP009273.1	-	697059	698207	788.763	183.575	127.631
gene-BW25113_0678	nagB	CP009273.1	-	698267	699067	1243.01	289.297	201.133
gene-BW25113_0679	nagE	CP009273.1	+	699400	701346	1231.31	286.574	199.24
gene-BW25113_0680	glnS	CP009273.1	+	701549	703213	1488.14	346.347	240.797
gene-BW25113_0681	chiP	CP009273.1	+	703790	705196	88.9147	20.6939	14.3874
gene-BW25113_0682	chiQ	CP009273.1	+	705246	705572	43.8379	10.2028	7.09346
gene-BW25113_0683	fur	CP009273.1	-	705656	706102	2465.47	573.808	398.94
gene-BW25113_0684	fldA	CP009273.1	-	706391	706921	1044.44	243.082	169.002
gene-BW25113_0685	ybfE	CP009273.1	-	707061	707354	204.323	47.5538	33.0617
gene-BW25113_0686	ybfF	CP009273.1	-	707494	708258	135.954	31.6418	21.9989
gene-BW25113_0687	seqA	CP009273.1	+	708443	708988	1199.84	279.249	194.148
gene-BW25113_0688	pgm	CP009273.1	+	709014	710654	1162.5	270.557	188.105
gene-BW25113_0689	ybfP	CP009273.1	+	710868	711362	30.2545	7.04139	4.89552
gene-BW25113_0691	ybfG	CP009273.1	-	711403	712053	6.43472	1.49761	1.04121
gene-BW25113_0692	potE	CP009273.1	-	712402	713721	13.7144	3.19186	2.21914
gene-BW25113_0693	speF	CP009273.1	-	713718	715916	7.23738	1.68442	1.17109
gene-BW25113_0694	kdpE	CP009273.1	-	716512	717189	44.8898	10.4476	7.26366
gene-BW25113_0695	kdpD	CP009273.1	-	717186	719870	27.8903	6.49114	4.51296
gene-BW25113_0696	kdpC	CP009273.1	-	719863	720435	17.6533	4.10859	2.85649
gene-BW25113_0697	kdpB	CP009273.1	-	720444	722492	6.52562	1.51876	1.05592
gene-BW25113_0698	kdpA	CP009273.1	-	722515	724188	3.5816	0.833575	0.579542
gene-BW25113_0699	ybfA	CP009273.1	+	724590	724796	179.237	41.7152	29.0025
gene-BW25113_0700	rhsC	CP009273.1	+	725039	729232	11.9766	2.78742	1.93795
gene-BW25113_0702	ybfB	CP009273.1	+	729232	729558	1.66667	0.387897	0.269685
gene-BW25113_0703	rhsO	CP009273.1	+	729589	731109	3.27214	0.761551	0.529467
gene-BW25113_0704	ybfC	CP009273.1	+	731106	731675	3.13333	0.729247	0.507008
gene-BW25113_0705	ybfL	CP009273.1	+	732281	733417	2.25945	0.525862	0.365605
gene-BW25113_0706	ybfD	CP009273.1	+	733548	734309	1.76959	0.411851	0.286339
gene-BW25113_0707	ybgA	CP009273.1	+	734457	734966	25.149	5.85314	4.06939
gene-BW25113_0708	phr	CP009273.1	+	734963	736381	35.6582	8.29903	5.76989
gene-BW25113_0709	dtpD	CP009273.1	-	736531	738012	22.249	5.17819	3.60013
gene-BW25113_0710	ybgI	CP009273.1	+	738283	739026	433.324	100.851	70.1166
gene-BW25113_0711	ybgJ	CP009273.1	+	739049	739705	323.274	75.2383	52.3094
gene-BW25113_0712	ybgK	CP009273.1	+	739699	740631	210.441	48.9777	34.0517
gene-BW25113_0713	ybgL	CP009273.1	+	740621	741355	142.837	33.2436	23.1126
gene-BW25113_0714	nei	CP009273.1	+	741391	742182	78.4192	18.2511	12.6891
gene-BW25113_0715	abrB	CP009273.1	-	742179	743225	132.827	30.914	21.4929
gene-BW25113_0716	ybgO	CP009273.1	-	743377	744438	15.9746	3.7179	2.58486
gene-BW25113_0717	ybgP	CP009273.1	-	744435	745163	8.46914	1.97109	1.3704
gene-BW25113_0718	ybgQ	CP009273.1	-	745178	747625	5.92647	1.37932	0.958968
gene-BW25113_0719	ybgD	CP009273.1	-	747685	748251	4.97178	1.15712	0.804489
gene-BW25113_0720	gltA	CP009273.1	-	748641	749924	899.664	209.386	145.575
gene-BW25113_0721	sdhC	CP009273.1	+	750633	751022	878.951	204.565	142.224
gene-BW25113_0722	sdhD	CP009273.1	+	751016	751363	24.8468	5.7828	4.02049
gene-BW25113_0723	sdhA	CP009273.1	+	751363	753129	1320.83	307.407	213.724
gene-BW25113_0724	sdhB	CP009273.1	+	753145	753861	1666.35	387.823	269.633
gene-BW25113_0726	sucA	CP009273.1	+	754162	756963	1782.61	414.881	288.446
gene-BW25113_0727	sucB	CP009273.1	+	756978	758195	3454.47	803.988	558.972
gene-BW25113_0728	sucC	CP009273.1	+	758470	759636	2876.8	669.542	465.498
gene-BW25113_0729	sucD	CP009273.1	+	759636	760505	3027.06	704.513	489.812
gene-BW25113_0730	mngR	CP009273.1	-	760609	761331	95.7579	22.2865	15.4947
gene-BW25113_0731	mngA	CP009273.1	+	761440	763416	4.33789	1.00959	0.701918
gene-BW25113_0732	mngB	CP009273.1	+	763434	766067	25.6784	5.97636	4.15505
gene-BW25113_0733	cydA	CP009273.1	+	766914	768482	2179.33	507.213	352.639
gene-BW25113_0734	cydB	CP009273.1	+	768498	769637	1509.35	351.283	244.229
gene-BW25113_0735	ybgE	CP009273.1	+	769765	770058	765.229	178.098	123.822
gene-BW25113_0736	ybgC	CP009273.1	+	770208	770612	361.564	84.1498	58.5051
gene-BW25113_0737	tolQ	CP009273.1	+	770609	771301	372.033	86.5862	60.199
gene-BW25113_0738	tolR	CP009273.1	+	771305	771733	382.984	89.135	61.971
gene-BW25113_0739	tolA	CP009273.1	+	771798	773063	408.879	95.1618	66.1611
gene-BW25113_0740	tolB	CP009273.1	+	773196	774488	1787.35	415.985	289.213
gene-BW25113_0741	pal	CP009273.1	+	774523	775044	6284.55	1462.65	1016.91
gene-BW25113_0742	ybgF	CP009273.1	+	775054	775845	2159.68	502.64	349.46
gene-BW25113_0743	lysT	CP009273.1	+	776010	776085	7178.49	1670.71	1161.56
gene-BW25113_0744	valT	CP009273.1	+	776221	776296	4247.6	988.58	687.309
gene-BW25113_0745	lysW	CP009273.1	+	776299	776374	2864.06	666.576	463.436
gene-BW25113_0746	valZ	CP009273.1	+	776524	776599	1567	364.702	253.558
gene-BW25113_0747	lysY	CP009273.1	+	776603	776678	1273.09	296.296	206
gene-BW25113_0748	lysZ	CP009273.1	+	776825	776900	870.826	202.675	140.909
gene-BW25113_0749	lysQ	CP009273.1	+	777033	777108	192.267	44.7478	31.1109
gene-BW25113_0750	nadA	CP009273.1	+	777541	778584	59.7816	13.9135	9.67332
gene-BW25113_0751	pnuC	CP009273.1	+	778622	779341	66.6069	15.502	10.7777
gene-BW25113_0752	zitB	CP009273.1	-	779338	780279	63.2845	14.7287	10.2401
gene-BW25113_0753	ybgS	CP009273.1	-	780393	780773	21.4409	4.99013	3.46938
gene-BW25113_0754	aroG	CP009273.1	+	781089	782141	721.467	167.913	116.741
gene-BW25113_0755	gpmA	CP009273.1	-	782299	783051	3846.1	895.134	622.341
gene-BW25113_0756	galM	CP009273.1	-	783253	784293	989.659	230.332	160.138
gene-BW25113_0757	galK	CP009273.1	-	784287	785435	1056.01	245.775	170.875
gene-BW25113_0758	galT	CP009273.1	-	785439	786485	1713.93	398.898	277.333
gene-BW25113_0759	galE	CP009273.1	-	786495	787511	4494.19	1045.97	727.209
gene-BW25113_0760	modF	CP009273.1	-	787772	789244	455.602	106.036	73.7214
gene-BW25113_0761	modE	CP009273.1	-	789312	790100	223.412	51.9965	36.1505
gene-BW25113_0762	acrZ	CP009273.1	+	790229	790378	145.533	33.8712	23.5489
gene-BW25113_0763	modA	CP009273.1	+	790545	791318	200.46	46.6547	32.4366
gene-BW25113_0764	modB	CP009273.1	+	791318	792007	117.791	27.4144	19.0598
gene-BW25113_0765	modC	CP009273.1	+	792010	793068	114.767	26.7106	18.5705
gene-BW25113_0766	ybhA	CP009273.1	-	793069	793887	230.579	53.6645	37.3102
gene-BW25113_0767	pgl	CP009273.1	+	794042	795037	603.337	140.42	97.6266
gene-BW25113_0768	ybhD	CP009273.1	-	795078	796031	21.1478	4.9219	3.42195
gene-BW25113_0769	ybhH	CP009273.1	+	796215	797267	3.60399	0.838786	0.583165
gene-BW25113_0770	ybhI	CP009273.1	+	797343	798776	2.5523	0.594018	0.41299
gene-BW25113_0771	ybhJ	CP009273.1	+	798959	801220	14.4735	3.36853	2.34197
gene-BW25113_0772	ybhC	CP009273.1	-	801454	802737	492.798	114.693	79.7402
gene-BW25113_0773	ybhB	CP009273.1	-	802889	803365	121.298	28.2306	19.6273
gene-BW25113_0774	bioA	CP009273.1	-	803424	804713	15.4628	3.59878	2.50205
gene-BW25113_0775	bioB	CP009273.1	+	804800	805840	13.9689	3.25111	2.26033
gene-BW25113_0776	bioF	CP009273.1	+	805837	806991	10.2678	2.38971	1.66145
gene-BW25113_0777	bioC	CP009273.1	+	806978	807733	11.7391	2.73213	1.89951
gene-BW25113_0778	bioD	CP009273.1	+	807726	808403	13.7408	3.19801	2.22341
gene-BW25113_0779	uvrB	CP009273.1	+	808982	811003	186.157	43.3259	30.1223
gene-BW25113_0780	ybhK	CP009273.1	-	811195	812103	229.854	53.4958	37.1929
gene-BW25113_0781	moaA	CP009273.1	+	812500	813489	1142.07	265.802	184.799
gene-BW25113_0782	moaB	CP009273.1	+	813511	814023	814.99	189.679	131.874
gene-BW25113_0783	moaC	CP009273.1	+	814026	814511	516.371	120.179	83.5545
gene-BW25113_0784	moaD	CP009273.1	+	814504	814749	356.715	83.0212	57.7204
gene-BW25113_0785	moaE	CP009273.1	+	814751	815203	351.788	81.8746	56.9232
gene-BW25113_0786	ybhL	CP009273.1	+	815340	816044	378.909	88.1867	61.3117
gene-BW25113_0787	ybhM	CP009273.1	+	816249	816962	13.098	3.04841	2.11941
gene-BW25113_0788	ybhN	CP009273.1	-	816998	817954	6.75014	1.57102	1.09225
gene-BW25113_0789	clsB	CP009273.1	-	817954	819195	4.89855	1.14008	0.79264
gene-BW25113_0790	ybhP	CP009273.1	-	819192	819953	5.83727	1.35856	0.944535
gene-BW25113_0791	ybhQ	CP009273.1	+	820086	820496	551.484	128.352	89.2362
gene-BW25113_0792	ybhR	CP009273.1	-	820458	821564	29.3415	6.82888	4.74777
gene-BW25113_0793	ybhS	CP009273.1	-	821575	822708	22.8956	5.32869	3.70477
gene-BW25113_0794	ybhF	CP009273.1	-	822701	824437	63.827	14.855	10.3279
gene-BW25113_0795	ybhG	CP009273.1	-	824430	825428	5.10572	1.1883	0.826161
gene-BW25113_0796	ybiH	CP009273.1	-	825428	826099	336.819	78.3907	54.501
gene-BW25113_0797	rhlE	CP009273.1	+	826328	827692	318.766	74.1891	51.5799
gene-BW25113_0798	ybiA	CP009273.1	-	827924	828406	62.6667	14.5849	10.1402
gene-BW25113_0799	dinG	CP009273.1	+	828526	830676	111.788	26.0172	18.0885
gene-BW25113_0800	ybiB	CP009273.1	+	830704	831666	223.218	51.9514	36.1191
gene-BW25113_0801	ybiC	CP009273.1	+	831807	832892	58.0783	13.517	9.3977
gene-BW25113_0802	ybiJ	CP009273.1	-	833121	833381	76.0613	17.7024	12.3076
gene-BW25113_0803	ybiI	CP009273.1	-	833646	833912	157.311	36.6123	25.4546
gene-BW25113_0804	ybiX	CP009273.1	-	833986	834663	299.556	69.7182	48.4715
gene-BW25113_0805	fiu	CP009273.1	-	834705	836987	565.731	131.667	91.5415
gene-BW25113_0806	mcbA	CP009273.1	-	837252	837512	21.2261	4.94012	3.43461
gene-BW25113_0807	rlmF	CP009273.1	+	837788	838714	110.002	25.6017	17.7996
gene-BW25113_0808	ybiO	CP009273.1	-	838711	840936	9.32749	2.17087	1.50929
gene-BW25113_0809	glnQ	CP009273.1	-	841197	841919	193.089	44.9392	31.2439
gene-BW25113_0810	glnP	CP009273.1	-	841916	842575	136.168	31.6915	22.0334
gene-BW25113_0811	glnH	CP009273.1	-	842714	843460	384.193	89.4164	62.1666
gene-BW25113_0812	dps	CP009273.1	-	843864	844367	383.101	89.1623	61.99
gene-BW25113_0813	rhtA	CP009273.1	-	844666	845553	63.6205	14.8069	10.2945
gene-BW25113_0814	ompX	CP009273.1	+	845906	846421	17827.5	4149.14	2884.69
gene-BW25113_0815	ybiP	CP009273.1	-	846470	848053	47.4514	11.0438	7.67816
gene-BW25113_0817	mntR	CP009273.1	+	848639	849106	249.804	58.1388	40.421
gene-BW25113_0818	ybiR	CP009273.1	+	849103	850221	102.948	23.9599	16.6581
gene-BW25113_0819	ldtB	CP009273.1	-	850280	851200	412.787	96.0713	66.7935
gene-BW25113_0820	ybiT	CP009273.1	+	851419	853011	570.187	132.704	92.2626
gene-BW25113_0821	ybiU	CP009273.1	-	853252	854517	49.4502	11.509	8.00159
gene-BW25113_0822	ybiV	CP009273.1	-	854669	855484	159.652	37.1571	25.8334
gene-BW25113_0823	ybiW	CP009273.1	-	855630	858062	11.6839	2.7193	1.89059
gene-BW25113_0824	ybiY	CP009273.1	-	858068	858967	28.1156	6.54357	4.54941
gene-BW25113_0825	fsaA	CP009273.1	+	859098	859760	131.635	30.6365	21.3
gene-BW25113_0826	moeB	CP009273.1	-	859836	860585	0.582415	0.13555	0.094241
gene-BW25113_0827	moeA	CP009273.1	-	860585	861820	320.756	74.6523	51.9019
gene-BW25113_0828	iaaA	CP009273.1	+	862024	862989	202.734	47.1839	32.8046
gene-BW25113_0829	gsiA	CP009273.1	+	862976	864847	76.4787	17.7995	12.3751
gene-BW25113_0830	gsiB	CP009273.1	+	864867	866405	51.1533	11.9053	8.27717
gene-BW25113_0831	gsiC	CP009273.1	+	866423	867343	32.2378	7.50297	5.21643
gene-BW25113_0832	gsiD	CP009273.1	+	867346	868257	23.0186	5.35732	3.72467
gene-BW25113_0833	yliE	CP009273.1	+	868435	870783	8.10302	1.88588	1.31116
gene-BW25113_0834	yliF	CP009273.1	+	870791	872119	13.687	3.18548	2.2147
gene-BW25113_0835	rimO	CP009273.1	-	872166	873491	227.69	52.9922	36.8428
gene-BW25113_0836	bssR	CP009273.1	+	873704	874087	168.396	39.1922	27.2483
gene-BW25113_0837	yliI	CP009273.1	+	874198	875313	14.5815	3.39368	2.35945
gene-BW25113_0838	gstB	CP009273.1	-	875310	875936	273.877	63.7417	44.3163
gene-BW25113_0839	dacC	CP009273.1	+	876183	877385	194.538	45.2764	31.4784
gene-BW25113_0840	deoR	CP009273.1	-	877432	878190	204.306	47.5498	33.0589
gene-BW25113_0841	ybjG	CP009273.1	-	878248	878844	140.514	32.703	22.7368
gene-BW25113_0842	mdfA	CP009273.1	+	879129	880361	98.6229	22.9533	15.9583
gene-BW25113_0843	ybjH	CP009273.1	-	880402	880686	110.446	25.7049	17.8713
gene-BW25113_0844	ybjI	CP009273.1	-	880772	881587	169.516	39.4529	27.4296
gene-BW25113_0845	ybjJ	CP009273.1	-	881587	882795	89.3982	20.8064	14.4656
gene-BW25113_0846	rcdA	CP009273.1	+	882879	883415	77.0615	17.9352	12.4694
gene-BW25113_0847	ybjL	CP009273.1	-	883590	885275	71.8926	16.7322	11.633
gene-BW25113_0848	ybjM	CP009273.1	+	885545	885922	70.0106	16.2941	11.3285
gene-BW25113_0849	grxA	CP009273.1	-	885952	886209	164.473	38.2791	26.6135
gene-BW25113_0850	ybjC	CP009273.1	+	886369	886656	363.388	84.5742	58.8001
gene-BW25113_0851	nfsA	CP009273.1	+	886640	887362	397.272	92.4603	64.2829
gene-BW25113_0852	rimK	CP009273.1	+	887423	888325	249.421	58.0498	40.359
gene-BW25113_0853	ybjN	CP009273.1	+	888413	888889	426.403	99.2402	68.9966
gene-BW25113_0854	potF	CP009273.1	+	889240	890352	11.0584	2.57371	1.78937
gene-BW25113_0855	potG	CP009273.1	+	890447	891580	9.15079	2.12974	1.4807
gene-BW25113_0856	potH	CP009273.1	+	891590	892543	6.3066	1.46779	1.02048
gene-BW25113_0857	potI	CP009273.1	+	892540	893385	8.56324	1.99299	1.38563
gene-BW25113_0858	ybjO	CP009273.1	+	893445	893933	36.5583	8.50851	5.91553
gene-BW25113_0859	rlmC	CP009273.1	+	893974	895101	67.0638	15.6083	10.8517
gene-BW25113_0860	artJ	CP009273.1	-	895300	896031	58.7118	13.6645	9.50021
gene-BW25113_0861	artM	CP009273.1	-	896322	896990	119.246	27.7532	19.2954
gene-BW25113_0862	artQ	CP009273.1	-	896990	897706	102.849	23.9368	16.6421
gene-BW25113_0863	artI	CP009273.1	-	897713	898444	270.626	62.985	43.7902
gene-BW25113_0864	artP	CP009273.1	-	898462	899190	182.442	42.4612	29.5211
gene-BW25113_0865	ybjP	CP009273.1	-	899408	899923	68.095	15.8483	11.0185
gene-BW25113_0866	ybjQ	CP009273.1	+	900049	900372	371.939	86.5645	60.1839
gene-BW25113_0867	amiD	CP009273.1	+	900369	901199	197.738	46.0213	31.9963
gene-BW25113_0868	ybjS	CP009273.1	-	901196	902209	114.101	26.5556	18.4627
gene-BW25113_0869	ybjT	CP009273.1	-	902308	903738	110.606	25.7422	17.8972
gene-BW25113_0870	ltaE	CP009273.1	-	903749	904750	248.775	57.8996	40.2546
gene-BW25113_0871	poxB	CP009273.1	-	904787	906505	14.6323	3.40551	2.36767
gene-BW25113_0872	hcr	CP009273.1	-	906638	907606	44.3798	10.3289	7.18114
gene-BW25113_0873	hcp	CP009273.1	-	907618	909270	28.029	6.52343	4.53541
gene-BW25113_0874	ybjE	CP009273.1	-	909414	910313	46.1922	10.7507	7.47441
gene-BW25113_0875	aqpZ	CP009273.1	-	910808	911503	35.3994	8.2388	5.72802
gene-BW25113_0876	ybjD	CP009273.1	+	911929	913587	133.027	30.9605	21.5253
gene-BW25113_0877	ybjX	CP009273.1	-	913584	914576	670.39	156.025	108.476
gene-BW25113_0878	macA	CP009273.1	+	914691	915806	69.4609	16.1662	11.2395
gene-BW25113_0879	macB	CP009273.1	+	915803	917749	60.4569	14.0706	9.7826
gene-BW25113_0880	cspD	CP009273.1	-	917822	918046	1413.21	328.908	228.673
gene-BW25113_0881	clpS	CP009273.1	+	918369	918689	719.193	167.384	116.373
gene-BW25113_0882	clpA	CP009273.1	+	918720	920996	1114.3	259.34	180.306
gene-BW25113_0883	serW	CP009273.1	-	921340	921427	33.5227	7.80202	5.42435
gene-BW25113_0884	infA	CP009273.1	-	921681	921899	4192.1	975.661	678.327
gene-BW25113_0885	aat	CP009273.1	-	922184	922888	123.067	28.6423	19.9135
gene-BW25113_0886	cydC	CP009273.1	-	922930	924651	155.469	36.1836	25.1566
gene-BW25113_0887	cydD	CP009273.1	-	924652	926418	159.067	37.0211	25.7389
gene-BW25113_0888	trxB	CP009273.1	-	926541	927506	1359.86	316.49	220.04
gene-BW25113_0889	lrp	CP009273.1	+	928051	928545	1969.13	458.292	318.627
gene-BW25113_0890	ftsK	CP009273.1	+	928680	932669	414.61	96.4957	67.0885
gene-BW25113_0891	lolA	CP009273.1	+	932828	933439	656.704	152.84	106.262
gene-BW25113_0892	rarA	CP009273.1	+	933450	934793	233.228	54.2812	37.7389
gene-BW25113_0893	serS	CP009273.1	+	934884	936176	2368.97	551.349	383.325
gene-BW25113_0894	dmsA	CP009273.1	+	936415	938859	376.188	87.5533	60.8713
gene-BW25113_0895	dmsB	CP009273.1	+	938870	939487	57.4466	13.37	9.29549
gene-BW25113_0896	dmsC	CP009273.1	+	939489	940352	25.6065	5.95961	4.14341
gene-BW25113_0897	ycaC	CP009273.1	-	940387	941013	11.8182	2.75054	1.91231
gene-BW25113_0898	ycaD	CP009273.1	+	941327	942475	28.2028	6.56387	4.56352
gene-BW25113_0899	ycaM	CP009273.1	+	942685	944115	45.0252	10.4791	7.28557
gene-BW25113_0900	ycaN	CP009273.1	-	944116	945024	39.1474	9.1111	6.33448
gene-BW25113_0901	ycaK	CP009273.1	+	945124	945714	25.2149	5.86847	4.08005
gene-BW25113_0902	pflA	CP009273.1	-	945796	946536	337.14	78.4655	54.553
gene-BW25113_0903	pflB	CP009273.1	-	946728	949010	4858.69	1130.8	786.19
gene-BW25113_0904	focA	CP009273.1	-	949065	949922	3818.6	888.734	617.891
gene-BW25113_0905	ycaO	CP009273.1	-	950328	952088	923.938	215.036	149.503
gene-BW25113_0906	ycaP	CP009273.1	+	952218	952910	18.8672	4.39113	3.05293
gene-BW25113_0907	serC	CP009273.1	+	953109	954197	720.668	167.727	116.612
gene-BW25113_0908	aroA	CP009273.1	+	954268	955551	219.803	51.1566	35.5665
gene-BW25113_0909	ycaL	CP009273.1	+	955720	956484	19.7033	4.5857	3.18821
gene-BW25113_0910	cmk	CP009273.1	+	956657	957340	1900.88	442.407	307.583
gene-BW25113_0911	rpsA	CP009273.1	+	957451	959124	40682.5	9468.37	6582.87
gene-BW25113_0912	ihfB	CP009273.1	+	959284	959568	2366.54	550.785	382.932
gene-BW25113_0913	ycaI	CP009273.1	+	959776	962040	18.7316	4.35955	3.03097
gene-BW25113_0914	msbA	CP009273.1	+	962077	963825	599.945	139.63	97.0777
gene-BW25113_0915	lpxK	CP009273.1	+	963822	964808	455.971	106.122	73.7811
gene-BW25113_0916	ycaQ	CP009273.1	+	964845	966077	57.6529	13.418	9.32887
gene-BW25113_0917	ycaR	CP009273.1	+	966129	966311	1178.61	274.308	190.712
gene-BW25113_0918	kdsB	CP009273.1	+	966308	967054	990.748	230.585	160.314
gene-BW25113_0919	ycbJ	CP009273.1	+	967208	968101	175.885	40.9351	28.4601
gene-BW25113_0920	ycbC	CP009273.1	-	968078	968857	47.4782	11.05	7.6825
gene-BW25113_0921	smtA	CP009273.1	+	968993	969778	702.557	163.512	113.682
gene-BW25113_0922	mukF	CP009273.1	+	969775	971097	538.668	125.369	87.1624
gene-BW25113_0923	mukE	CP009273.1	+	971078	971782	53.099	12.3582	8.592
gene-BW25113_0924	mukB	CP009273.1	+	971782	976242	869.338	202.328	140.668
gene-BW25113_0925	ldtD	CP009273.1	+	976503	978350	151.014	35.1468	24.4357
gene-BW25113_0926	ycbK	CP009273.1	+	978531	979079	592.029	137.788	95.7968
gene-BW25113_0927	ycbL	CP009273.1	+	979106	979753	696.932	162.203	112.771
gene-BW25113_0928	aspC	CP009273.1	-	979975	981165	522.75	121.664	84.5867
gene-BW25113_0929	ompF	CP009273.1	-	981350	982438	18489.9	4303.31	2991.87
gene-BW25113_0930	asnS	CP009273.1	-	983041	984441	1203.15	280.018	194.682
gene-BW25113_0931	pncB	CP009273.1	-	984610	985812	582.505	135.571	94.2557
gene-BW25113_0932	pepN	CP009273.1	+	986078	988690	828.758	192.884	134.102
gene-BW25113_0933	ssuB	CP009273.1	-	988733	989500	28.7094	6.68177	4.64549
gene-BW25113_0934	ssuC	CP009273.1	-	989497	990288	6.43083	1.4967	1.04058
gene-BW25113_0935	ssuD	CP009273.1	-	990299	991444	2.06846	0.48141	0.334699
gene-BW25113_0936	ssuA	CP009273.1	-	991441	992400	3.27453	0.762108	0.529855
gene-BW25113_0937	ssuE	CP009273.1	-	992393	992968	8.13715	1.89383	1.31668
gene-BW25113_0938	elfA	CP009273.1	+	993324	993863	10.9222	2.54202	1.76734
gene-BW25113_0939	elfD	CP009273.1	+	993946	994647	4.31482	1.00422	0.698185
gene-BW25113_0940	elfC	CP009273.1	+	994672	997272	7.86351	1.83014	1.2724
gene-BW25113_0941	elfG	CP009273.1	+	997263	998333	18.957	4.41203	3.06746
gene-BW25113_0942	ycbU	CP009273.1	+	998345	998887	6.97974	1.62445	1.1294
gene-BW25113_0943	ycbV	CP009273.1	+	998895	999410	9.53153	2.21835	1.54231
gene-BW25113_0944	ycbF	CP009273.1	+	999403	1000113	39.5144	9.19651	6.39386
gene-BW25113_0945	pyrD	CP009273.1	+	1000224	1001234	111.317	25.9076	18.0122
gene-BW25113_0946	zapC	CP009273.1	+	1001408	1001950	233.759	54.4046	37.8247
gene-BW25113_0947	ycbX	CP009273.1	-	1001947	1003056	251.129	58.4473	40.6354
gene-BW25113_0948	rlmL	CP009273.1	+	1003300	1005408	439.794	102.357	71.1636
gene-BW25113_0949	uup	CP009273.1	+	1005420	1007327	675.864	157.299	109.362
gene-BW25113_0950	pqiA	CP009273.1	+	1007457	1008710	164.719	38.3365	26.6534
gene-BW25113_0951	pqiB	CP009273.1	+	1008715	1010355	233.624	54.3733	37.803
gene-BW25113_0952	pqiC	CP009273.1	+	1010352	1010915	266.049	61.9199	43.0497
gene-BW25113_0953	rmf	CP009273.1	+	1011171	1011338	393.565	91.5978	63.6832
gene-BW25113_0954	fabA	CP009273.1	-	1011408	1011926	11730.6	2730.16	1898.14
gene-BW25113_0955	ycbZ	CP009273.1	-	1011995	1013755	653.169	152.017	105.69
gene-BW25113_0956	matP	CP009273.1	+	1013941	1014393	341.192	79.4085	55.2087
gene-BW25113_0957	ompA	CP009273.1	-	1014469	1015509	38905	9054.69	6295.26
gene-BW25113_0958	sulA	CP009273.1	-	1015866	1016375	177.933	41.4119	28.7916
gene-BW25113_0959	sxy	CP009273.1	+	1016594	1017223	85.5556	19.9121	13.8438
gene-BW25113_0960	yccS	CP009273.1	-	1017186	1019339	118.906	27.674	19.2403
gene-BW25113_0961	yccF	CP009273.1	-	1019358	1019804	168.058	39.1136	27.1937
gene-BW25113_0962	helD	CP009273.1	+	1019927	1021981	142.472	33.1586	23.0535
gene-BW25113_0963	mgsA	CP009273.1	-	1022013	1022471	1238.62	288.275	200.423
gene-BW25113_0964	yccT	CP009273.1	-	1022567	1023229	11.0045	2.56117	1.78065
gene-BW25113_0965	yccU	CP009273.1	+	1023402	1023815	277.807	64.6563	44.9522
gene-BW25113_0966	hspQ	CP009273.1	-	1023860	1024177	925.245	215.34	149.715
gene-BW25113_0967	rlmI	CP009273.1	-	1024235	1025425	381.725	88.8419	61.7672
gene-BW25113_0968	yccX	CP009273.1	+	1025520	1025798	88.5771	20.6153	14.3327
gene-BW25113_0969	tusE	CP009273.1	-	1025795	1026124	309.903	72.1263	50.1457
gene-BW25113_0970	yccA	CP009273.1	-	1026215	1026874	1054.07	245.323	170.56
gene-BW25113_0971	serT	CP009273.1	-	1027081	1027168	38.0795	8.86257	6.16169
gene-BW25113_0972	hyaA	CP009273.1	+	1027595	1028713	2.71582	0.632075	0.439449
gene-BW25113_0973	hyaB	CP009273.1	+	1028710	1030503	3.04292	0.708204	0.492378
gene-BW25113_0974	hyaC	CP009273.1	+	1030522	1031229	4.34742	1.01181	0.70346
gene-BW25113_0975	hyaD	CP009273.1	+	1031226	1031813	10.9991	2.55991	1.77977
gene-BW25113_0976	hyaE	CP009273.1	+	1031810	1032208	5.14346	1.19708	0.832269
gene-BW25113_0977	hyaF	CP009273.1	+	1032205	1033062	4.30808	1.00266	0.697095
gene-BW25113_0978	cbdA	CP009273.1	+	1033196	1034740	7.5767	1.76339	1.22599
gene-BW25113_0979	cbdB	CP009273.1	+	1034752	1035888	9.08531	2.1145	1.4701
gene-BW25113_0980	appA	CP009273.1	+	1036073	1037371	17.592	4.09433	2.84658
gene-BW25113_0981	etk	CP009273.1	-	1037486	1039666	28.7029	6.68026	4.64444
gene-BW25113_0982	etp	CP009273.1	-	1039686	1040132	13.9418	3.2448	2.25594
gene-BW25113_0983	gfcE	CP009273.1	-	1040120	1041259	11.7307	2.73018	1.89816
gene-BW25113_0984	gfcD	CP009273.1	-	1041305	1043401	14.9784	3.48605	2.42367
gene-BW25113_0985	gfcC	CP009273.1	-	1043401	1044147	6.05442	1.40909	0.979671
gene-BW25113_0986	gfcB	CP009273.1	-	1044144	1044788	8.35093	1.94358	1.35127
gene-BW25113_0987	gfcA	CP009273.1	-	1044895	1045200	29.8007	6.93575	4.82207
gene-BW25113_0988	insB1	CP009273.1	+	1045483	1045986	241.051	56.1019	39.0048
gene-BW25113_0989	cspH	CP009273.1	-	1046419	1046631	12.2817	2.85842	1.98731
gene-BW25113_0990	cspG	CP009273.1	+	1046917	1047129	263.657	61.3632	42.6627
gene-BW25113_0991	ymcE	CP009273.1	+	1047303	1047533	189.641	44.1368	30.6861
gene-BW25113_0992	yccM	CP009273.1	-	1047745	1048818	50.3371	11.7154	8.14509
gene-BW25113_0993	torS	CP009273.1	-	1048890	1051634	13.4036	3.11954	2.16886
gene-BW25113_0994	torT	CP009273.1	+	1051717	1052745	20.344	4.73483	3.29189
gene-BW25113_0995	torR	CP009273.1	-	1052718	1053410	61.8413	14.3928	10.0066
gene-BW25113_0996	torC	CP009273.1	+	1053540	1054712	2.77989	0.646987	0.449817
gene-BW25113_0997	torA	CP009273.1	+	1054712	1057258	6.83255	1.5902	1.10558
gene-BW25113_0998	torD	CP009273.1	+	1057255	1057854	29.5175	6.86985	4.77626
gene-BW25113_0999	cbpM	CP009273.1	-	1058006	1058311	9.4847	2.20745	1.53473
gene-BW25113_1000	cbpA	CP009273.1	-	1058311	1059231	139.879	32.5553	22.634
gene-BW25113_1001	yccE	CP009273.1	+	1059492	1060748	3.94033	0.917067	0.637589
gene-BW25113_1002	agp	CP009273.1	+	1061041	1062282	181.345	42.2058	29.3436
gene-BW25113_1003	yccJ	CP009273.1	-	1062320	1062547	219.285	51.036	35.4827
gene-BW25113_1004	wrbA	CP009273.1	-	1062568	1063164	237.524	55.281	38.434
gene-BW25113_1006	rutG	CP009273.1	-	1063967	1065295	11.7848	2.74277	1.90691
gene-BW25113_1007	rutF	CP009273.1	-	1065316	1065810	4.87879	1.13548	0.789442
gene-BW25113_1008	rutE	CP009273.1	-	1065821	1066411	2.31811	0.539512	0.375095
gene-BW25113_1009	rutD	CP009273.1	-	1066421	1067221	1.71411	0.398938	0.277361
gene-BW25113_1010	rutC	CP009273.1	-	1067229	1067615	3.51163	0.81729	0.56822
gene-BW25113_1011	rutB	CP009273.1	-	1067627	1068319	3.07637	0.715989	0.497791
gene-BW25113_1012	rutA	CP009273.1	-	1068319	1069467	1.73457	0.4037	0.280672
gene-BW25113_1013	rutR	CP009273.1	+	1069698	1070336	118.186	27.5065	19.1238
gene-BW25113_1014	putA	CP009273.1	-	1070376	1074338	131.053	30.5011	21.2058
gene-BW25113_1015	putP	CP009273.1	+	1074761	1076269	194.18	45.193	31.4204
gene-BW25113_1018	efeO	CP009273.1	+	1077699	1078826	323.679	75.3325	52.3748
gene-BW25113_1019	efeB	CP009273.1	+	1078832	1080103	242.987	56.5523	39.3179
gene-BW25113_1020	phoH	CP009273.1	+	1080448	1081512	21.2638	4.94891	3.44073
gene-BW25113_1021	pgaD	CP009273.1	-	1081562	1081975	15.4614	3.59845	2.50182
gene-BW25113_1022	pgaC	CP009273.1	-	1081977	1083302	7.85524	1.82821	1.27106
gene-BW25113_1023	pgaB	CP009273.1	-	1083295	1085313	7.32737	1.70536	1.18565
gene-BW25113_1024	pgaA	CP009273.1	-	1085322	1087745	10.4662	2.43588	1.69354
gene-BW25113_1025	ycdT	CP009273.1	+	1088332	1089690	17.8352	4.15093	2.88593
gene-BW25113_1026	insF1	CP009273.1	-	1089731	1090597	39.3778	9.16472	6.37176
gene-BW25113_1027	insE1	CP009273.1	-	1090594	1090893	68.7139	15.9924	11.1187
gene-BW25113_1028	ymdE	CP009273.1	+	1090961	1091302	1.94152	0.451866	0.314159
gene-BW25113_1029	ycdU	CP009273.1	+	1091299	1092285	3.1844	0.741131	0.515271
gene-BW25113_1032	serX	CP009273.1	-	1093021	1093108	8.48864	1.97563	1.37356
gene-BW25113_1033	ghrA	CP009273.1	+	1093342	1094280	101.999	23.7391	16.5046
gene-BW25113_1034	ycdX	CP009273.1	+	1094335	1095072	255.337	59.4268	41.3164
gene-BW25113_1035	ycdY	CP009273.1	+	1095096	1095650	328.429	76.438	53.1434
gene-BW25113_1036	ycdZ	CP009273.1	+	1095752	1096243	1881.64	437.931	304.471
gene-BW25113_1037	csgG	CP009273.1	-	1096307	1097140	44.7938	10.4252	7.24812
gene-BW25113_1038	csgF	CP009273.1	-	1097167	1097583	6.76019	1.57336	1.09387
gene-BW25113_1039	csgE	CP009273.1	-	1097608	1097997	3.2641	0.759682	0.528168
gene-BW25113_1040	csgD	CP009273.1	-	1098002	1098652	14.0061	3.25977	2.26635
gene-BW25113_1041	csgB	CP009273.1	+	1099407	1099862	2.23903	0.521109	0.362301
gene-BW25113_1042	csgA	CP009273.1	+	1099903	1100358	10.7368	2.49887	1.73734
gene-BW25113_1043	csgC	CP009273.1	+	1100417	1100749	8.75375	2.03733	1.41645
gene-BW25113_1044	ymdA	CP009273.1	+	1100870	1101181	34.4551	8.01903	5.57522
gene-BW25113_1045	ymdB	CP009273.1	+	1101276	1101809	73.0243	16.9956	11.8161
gene-BW25113_1046	clsC	CP009273.1	+	1101811	1103232	46.5331	10.83	7.52956
gene-BW25113_1047	opgC	CP009273.1	-	1103240	1104397	37.6382	8.75984	6.09027
gene-BW25113_1048	opgG	CP009273.1	+	1104791	1106326	712.971	165.936	115.367
gene-BW25113_1049	opgH	CP009273.1	+	1106319	1108862	577.133	134.321	93.3865
gene-BW25113_1050	yceK	CP009273.1	+	1109035	1109262	55.2675	12.8629	8.9429
gene-BW25113_1051	msyB	CP009273.1	-	1109263	1109637	58.944	13.7185	9.53779
gene-BW25113_1053	mdtG	CP009273.1	-	1109720	1110946	19.5232	4.5438	3.15907
gene-BW25113_1054	lpxL	CP009273.1	-	1111118	1112038	276.998	64.468	44.8213
gene-BW25113_1055	yceA	CP009273.1	+	1112263	1113315	102.77	23.9186	16.6293
gene-BW25113_1056	yceI	CP009273.1	-	1113357	1113932	87.4045	20.3424	14.143
gene-BW25113_1057	yceJ	CP009273.1	-	1113936	1114502	18.0829	4.20858	2.92601
gene-BW25113_1058	yceO	CP009273.1	-	1114763	1114903	11.2979	2.62945	1.82812
gene-BW25113_1059	solA	CP009273.1	-	1114924	1116042	285.056	66.3435	46.1253
gene-BW25113_1060	bssS	CP009273.1	-	1116157	1116411	1832.42	426.474	296.506
gene-BW25113_1061	dinI	CP009273.1	-	1116698	1116943	216.439	50.3737	35.0222
gene-BW25113_1062	pyrC	CP009273.1	-	1117017	1118063	153.217	35.6594	24.7922
gene-BW25113_1063	yceB	CP009273.1	-	1118169	1118729	196.342	45.6964	31.7703
gene-BW25113_1064	grxB	CP009273.1	-	1118863	1119510	235.446	54.7973	38.0978
gene-BW25113_1065	mdtH	CP009273.1	-	1119574	1120782	19.6038	4.56256	3.17211
gene-BW25113_1066	rimJ	CP009273.1	+	1121018	1121602	399.419	92.9601	64.6304
gene-BW25113_1067	yceH	CP009273.1	+	1121613	1122260	395.145	91.9654	63.9388
gene-BW25113_1068	yceM	CP009273.1	+	1122262	1123185	191.687	44.613	31.0171
gene-BW25113_1069	murJ	CP009273.1	+	1123295	1124830	76.5293	17.8113	12.3833
gene-BW25113_1070	flgN	CP009273.1	-	1124870	1125286	196.549	45.7445	31.8038
gene-BW25113_1071	flgM	CP009273.1	-	1125291	1125584	303.963	70.7437	49.1845
gene-BW25113_1072	flgA	CP009273.1	-	1125660	1126319	361.179	84.0601	58.4427
gene-BW25113_1073	flgB	CP009273.1	+	1126474	1126890	876.384	203.968	141.809
gene-BW25113_1074	flgC	CP009273.1	+	1126894	1127298	881.938	205.261	142.707
gene-BW25113_1075	flgD	CP009273.1	+	1127310	1128005	823.257	191.603	133.212
gene-BW25113_1076	flgE	CP009273.1	+	1128030	1129238	685.422	159.524	110.909
gene-BW25113_1077	flgF	CP009273.1	+	1129258	1130013	424.823	98.8725	68.741
gene-BW25113_1078	flgG	CP009273.1	+	1130185	1130967	366.784	85.3647	59.3497
gene-BW25113_1079	flgH	CP009273.1	+	1131020	1131718	152.887	35.5827	24.7388
gene-BW25113_1080	flgI	CP009273.1	+	1131730	1132827	100.107	23.2987	16.1984
gene-BW25113_1081	flgJ	CP009273.1	+	1132827	1133768	86.9085	20.2269	14.0627
gene-BW25113_1082	flgK	CP009273.1	+	1133834	1135477	75.1442	17.4889	12.1592
gene-BW25113_1083	flgL	CP009273.1	+	1135489	1136442	103.135	24.0035	16.6884
gene-BW25113_1084	rne	CP009273.1	-	1136638	1139823	1490.4	346.873	241.163
gene-BW25113_1085	yceQ	CP009273.1	+	1139958	1140278	855.772	199.171	138.473
gene-BW25113_1086	rluC	CP009273.1	+	1140396	1141355	566.397	131.822	91.6493
gene-BW25113_1087	yceF	CP009273.1	-	1141467	1142051	135.265	31.4813	21.8874
gene-BW25113_1088	yceD	CP009273.1	+	1142250	1142771	22738.7	5292.18	3679.38
gene-BW25113_1089	rpmF	CP009273.1	+	1142823	1142996	39494.4	9191.86	6390.63
gene-BW25113_1090	plsX	CP009273.1	+	1143077	1144147	1698.13	395.22	274.776
gene-BW25113_1091	fabH	CP009273.1	+	1144215	1145168	2733.62	636.217	442.329
gene-BW25113_1092	fabD	CP009273.1	+	1145184	1146113	4685.57	1090.51	758.177
gene-BW25113_1093	fabG	CP009273.1	+	1146126	1146860	12435.2	2894.14	2012.15
gene-BW25113_1094	acpP	CP009273.1	+	1147071	1147307	46466.8	10814.6	7518.84
gene-BW25113_1095	fabF	CP009273.1	+	1147395	1148636	6637.13	1544.71	1073.96
gene-BW25113_1096	pabC	CP009273.1	+	1148756	1149565	121.374	28.2484	19.6397
gene-BW25113_1097	yceG	CP009273.1	+	1149568	1150590	108.906	25.3465	17.6221
gene-BW25113_1098	tmk	CP009273.1	+	1150580	1151221	273.504	63.6548	44.2559
gene-BW25113_1099	holB	CP009273.1	+	1151218	1152222	188.802	43.9415	30.5503
gene-BW25113_1100	ycfH	CP009273.1	+	1152233	1153030	282.58	65.7672	45.7246
gene-BW25113_1101	ptsG	CP009273.1	+	1153325	1154758	4798.95	1116.9	776.522
gene-BW25113_1102	fhuE	CP009273.1	-	1154818	1157007	66.2954	15.4295	10.7273
gene-BW25113_1103	hinT	CP009273.1	+	1157341	1157700	832.975	193.865	134.785
gene-BW25113_1104	ycfL	CP009273.1	+	1157703	1158080	748.011	174.091	121.036
gene-BW25113_1105	lpoB	CP009273.1	+	1158094	1158735	518.449	120.663	83.8908
gene-BW25113_1106	thiK	CP009273.1	+	1158716	1159540	192.394	44.7773	31.1314
gene-BW25113_1107	nagZ	CP009273.1	+	1159551	1160576	402.559	93.691	65.1386
gene-BW25113_1108	ycfP	CP009273.1	+	1160599	1161141	1015.18	236.271	164.267
gene-BW25113_1109	ndh	CP009273.1	+	1161541	1162845	2227.12	518.337	360.373
gene-BW25113_1110	ycfJ	CP009273.1	+	1163055	1163594	201.8	46.9666	32.6535
gene-BW25113_1111	ycfQ	CP009273.1	-	1163656	1164288	131.324	30.5641	21.2496
gene-BW25113_1112	bhsA	CP009273.1	+	1164529	1164786	50.093	11.6586	8.1056
gene-BW25113_1113	ldtC	CP009273.1	-	1164868	1165830	30.9024	7.19217	5.00035
gene-BW25113_1114	mfd	CP009273.1	-	1165974	1169420	241.692	56.2509	39.1084
gene-BW25113_1115	ycfT	CP009273.1	-	1169548	1170621	5.68622	1.3234	0.920093
gene-BW25113_1116	lolC	CP009273.1	+	1170883	1172082	294.067	68.4407	47.5833
gene-BW25113_1117	lolD	CP009273.1	+	1172075	1172776	15.8931	3.69894	2.57168
gene-BW25113_1118	lolE	CP009273.1	+	1172776	1174020	386.941	90.056	62.6113
gene-BW25113_1119	nagK	CP009273.1	+	1174049	1174960	363.315	84.5573	58.7883
gene-BW25113_1120	cobB	CP009273.1	+	1175087	1175815	298.885	69.5619	48.3628
gene-BW25113_1121	ycfZ	CP009273.1	-	1175935	1176723	23.5577	5.48277	3.81189
gene-BW25113_1122	ymfA	CP009273.1	-	1176720	1177181	45.3268	10.5493	7.33438
gene-BW25113_1123	potD	CP009273.1	-	1177239	1178285	1510.59	351.573	244.431
gene-BW25113_1124	potC	CP009273.1	-	1178282	1179076	682.299	158.797	110.404
gene-BW25113_1125	potB	CP009273.1	-	1179073	1179900	430.518	100.198	69.6626
gene-BW25113_1126	potA	CP009273.1	-	1179914	1181050	518.532	120.682	83.9042
gene-BW25113_1127	pepT	CP009273.1	+	1181300	1182526	554.395	129.029	89.7073
gene-BW25113_1128	roxA	CP009273.1	-	1182575	1183696	516.997	120.325	83.6559
gene-BW25113_1129	phoQ	CP009273.1	-	1183772	1185232	0.562514	0.130919	0.091021
gene-BW25113_1130	phoP	CP009273.1	-	1185232	1185903	654.363	152.295	105.883
gene-BW25113_1131	purB	CP009273.1	-	1186072	1187442	522.371	121.576	84.5253
gene-BW25113_1132	hflD	CP009273.1	-	1187446	1188087	293.564	68.3236	47.5019
gene-BW25113_1133	mnmA	CP009273.1	-	1188123	1189229	522.179	121.531	84.4943
gene-BW25113_1134	nudJ	CP009273.1	-	1189283	1189744	182.121	42.3866	29.4692
gene-BW25113_1135	rluE	CP009273.1	-	1189754	1190407	148.049	34.4567	23.9559
gene-BW25113_1136	icd	CP009273.1	+	1190579	1191829	2706.42	629.887	437.928
gene-BW25113_1137	ymfD	CP009273.1	-	1192323	1192988	23.5736	5.48647	3.81446
gene-BW25113_1138	ymfE	CP009273.1	-	1192989	1193693	21.5617	5.01823	3.48892
gene-BW25113_1139	lit	CP009273.1	+	1194151	1195044	21.0906	4.90859	3.41269
gene-BW25113_1140	intE	CP009273.1	-	1195135	1196262	16.8805	3.92874	2.73145
gene-BW25113_1141	xisE	CP009273.1	-	1196243	1196488	13.9504	3.2468	2.25733
gene-BW25113_1143	ymfI	CP009273.1	+	1196953	1197294	100.904	23.4841	16.3273
gene-BW25113_1144	ymfJ	CP009273.1	-	1197232	1197540	28.4045	6.61082	4.59617
gene-BW25113_1145	cohE	CP009273.1	-	1197715	1198389	231.926	53.978	37.5282
gene-BW25113_1146	croE	CP009273.1	+	1198480	1198680	9.11443	2.12128	1.47481
gene-BW25113_1147	ymfL	CP009273.1	+	1198724	1199281	14.6932	3.41968	2.37753
gene-BW25113_1148	ymfM	CP009273.1	+	1199278	1199616	4.64947	1.08211	0.752335
gene-BW25113_1150	ymfR	CP009273.1	+	1201005	1201187	0.252637	0.058798	0.040879
gene-BW25113_1151	beeE	CP009273.1	+	1201187	1201598	0.639718	0.148887	0.103513
gene-BW25113_1152	jayE	CP009273.1	+	1201599	1202378	2.4359	0.566927	0.394155
gene-BW25113_1153	ymfQ	CP009273.1	+	1202369	1202953	2.39145	0.556583	0.386963
gene-BW25113_1154	stfP	CP009273.1	+	1202957	1203586	1.34603	0.313273	0.217803
gene-BW25113_1155	tfaP	CP009273.1	+	1203588	1204001	2.55314	0.594213	0.413126
gene-BW25113_1156	tfaE	CP009273.1	-	1203973	1204575	4.23041	0.984577	0.684526
gene-BW25113_1157	stfE	CP009273.1	-	1204575	1205075	2.8783	0.66989	0.465741
gene-BW25113_1158	pinE	CP009273.1	+	1205141	1205695	3.07027	0.714569	0.496804
gene-BW25113_1159	mcrA	CP009273.1	+	1205802	1206635	94.4472	21.9815	15.2826
gene-BW25113_1160	iraM	CP009273.1	-	1207136	1207459	4.99383	1.16226	0.808056
gene-BW25113_1161	ycgX	CP009273.1	-	1208159	1208563	11.9827	2.78884	1.93894
gene-BW25113_1162	bluR	CP009273.1	-	1208784	1209515	288.99	67.2591	46.7618
gene-BW25113_1163	bluF	CP009273.1	-	1209720	1210931	51.0008	11.8698	8.25249
gene-BW25113_1164	ycgZ	CP009273.1	+	1211245	1211481	12.5401	2.91856	2.02912
gene-BW25113_1165	ymgA	CP009273.1	+	1211524	1211796	7.86813	1.83122	1.27315
gene-BW25113_1166	ariR	CP009273.1	+	1211825	1212091	2.64794	0.616277	0.428466
gene-BW25113_1167	ymgC	CP009273.1	+	1212204	1212452	3.03213	0.705693	0.490632
gene-BW25113_1168	ycgG	CP009273.1	+	1212784	1214307	4.51837	1.0516	0.731123
gene-BW25113_1171	ymgD	CP009273.1	-	1217761	1218090	37.1364	8.64305	6.00907
gene-BW25113_1172	ymgG	CP009273.1	-	1218100	1218444	28.1043	6.54096	4.54759
gene-BW25113_1174	minE	CP009273.1	-	1219735	1220001	1827.76	425.39	295.752
gene-BW25113_1175	minD	CP009273.1	-	1220005	1220817	2096.47	487.929	339.232
gene-BW25113_1176	minC	CP009273.1	-	1220841	1221536	1303.02	303.264	210.844
gene-BW25113_1177	ycgJ	CP009273.1	+	1222056	1222424	151.843	35.3396	24.5698
gene-BW25113_1178	pliG	CP009273.1	-	1222527	1222928	88.995	20.7125	14.4004
gene-BW25113_1179	ycgL	CP009273.1	+	1223170	1223463	446.255	103.861	72.209
gene-BW25113_1180	ycgM	CP009273.1	+	1223535	1224194	295.43	68.7579	47.8039
gene-BW25113_1181	ycgN	CP009273.1	+	1224271	1224732	170.065	39.5806	27.5184
gene-BW25113_1182	hlyE	CP009273.1	-	1224939	1225850	4.08333	0.950348	0.660728
gene-BW25113_1183	umuD	CP009273.1	+	1226223	1226642	0.587144	0.136651	0.095006
gene-BW25113_1184	umuC	CP009273.1	+	1226642	1227910	18.3492	4.27055	2.96909
gene-BW25113_1185	dsbB	CP009273.1	-	1227956	1228486	492.427	114.607	79.6802
gene-BW25113_1186	nhaB	CP009273.1	-	1228632	1230173	415.015	96.5899	67.154
gene-BW25113_1187	fadR	CP009273.1	+	1230394	1231113	747.756	174.031	120.995
gene-BW25113_1188	ycgB	CP009273.1	-	1231165	1232697	13.5558	3.15495	2.19347
gene-BW25113_1189	dadA	CP009273.1	+	1233027	1234325	397.581	92.5324	64.333
gene-BW25113_1190	dadX	CP009273.1	+	1234335	1235405	282.151	65.6674	45.6552
gene-BW25113_1191	cvrA	CP009273.1	-	1235791	1237527	119.174	27.7365	19.2837
gene-BW25113_1192	ldcA	CP009273.1	-	1237622	1238536	97.4503	22.6804	15.7685
gene-BW25113_1193	emtA	CP009273.1	+	1238636	1239247	253.827	59.0752	41.072
gene-BW25113_1194	ycgR	CP009273.1	-	1239249	1239983	12.0626	2.80742	1.95186
gene-BW25113_1195	ymgE	CP009273.1	+	1240184	1240438	6.59608	1.53516	1.06732
gene-BW25113_1196	ycgY	CP009273.1	+	1240616	1241056	4.07029	0.947313	0.658619
gene-BW25113_1197	treA	CP009273.1	-	1241135	1242832	23.1243	5.3819	3.74176
gene-BW25113_1198	dhaM	CP009273.1	-	1243152	1244570	1638.05	381.237	265.055
gene-BW25113_1199	dhaL	CP009273.1	-	1244581	1245213	1814.75	422.362	293.647
gene-BW25113_1200	dhaK	CP009273.1	-	1245224	1246294	2046.89	476.389	331.209
gene-BW25113_1201	dhaR	CP009273.1	+	1246522	1248441	91.0089	21.1812	14.7262
gene-BW25113_1202	ycgV	CP009273.1	-	1248541	1251408	20.1245	4.68374	3.25636
gene-BW25113_1203	ychF	CP009273.1	-	1252177	1253268	1005.51	234.022	162.703
gene-BW25113_1204	pth	CP009273.1	-	1253385	1253969	286.094	66.585	46.2932
gene-BW25113_1205	ychH	CP009273.1	+	1254247	1254525	1433.85	333.712	232.013
gene-BW25113_1206	dauA	CP009273.1	-	1254580	1256259	143.387	33.3716	23.2016
gene-BW25113_1207	prs	CP009273.1	-	1256384	1257331	2233	519.704	361.323
gene-BW25113_1208	ispE	CP009273.1	-	1257482	1258333	707.926	164.762	114.55
gene-BW25113_1209	lolB	CP009273.1	-	1258333	1258956	269.3	62.6765	43.5757
gene-BW25113_1210	hemA	CP009273.1	+	1259170	1260426	298.873	69.5591	48.3609
gene-BW25113_1211	prfA	CP009273.1	+	1260468	1261550	317.625	73.9236	51.3953
gene-BW25113_1212	prmC	CP009273.1	+	1261550	1262383	173.843	40.46	28.1298
gene-BW25113_1213	ychQ	CP009273.1	+	1262380	1262772	166.64	38.7835	26.9642
gene-BW25113_1214	ychA	CP009273.1	+	1262776	1263585	512.326	119.238	82.9
gene-BW25113_1215	kdsA	CP009273.1	+	1263621	1264475	1016.25	236.52	164.44
gene-BW25113_1216	chaA	CP009273.1	-	1266205	1267305	205.242	47.7676	33.2103
gene-BW25113_1217	chaB	CP009273.1	+	1267575	1267805	30.2121	7.03152	4.88865
gene-BW25113_1218	chaC	CP009273.1	+	1267963	1268658	68.6724	15.9827	11.112
gene-BW25113_1219	ychN	CP009273.1	-	1268702	1269055	515.319	119.935	83.3843
gene-BW25113_1220	ychO	CP009273.1	+	1269240	1270634	65.0882	15.1485	10.532
gene-BW25113_1221	narL	CP009273.1	-	1270635	1271285	206.242	48.0004	33.3722
gene-BW25113_1222	narX	CP009273.1	-	1271278	1273074	119.826	27.8881	19.3892
gene-BW25113_1223	narK	CP009273.1	+	1273413	1274804	743.495	173.04	120.306
gene-BW25113_1224	narG	CP009273.1	+	1275320	1279063	714.476	166.286	115.61
gene-BW25113_1225	narH	CP009273.1	+	1279060	1280598	31.2387	7.27043	5.05476
gene-BW25113_1226	narJ	CP009273.1	+	1280595	1281305	11.6536	2.71224	1.88568
gene-BW25113_1227	narI	CP009273.1	+	1281305	1281982	10.3866	2.41736	1.68067
gene-BW25113_1229	tpr	CP009273.1	-	1282543	1282632	0.698917	0.162665	0.113092
gene-BW25113_1230	tyrV	CP009273.1	-	1282700	1282784	722.737	168.209	116.947
gene-BW25113_1231	tyrT	CP009273.1	-	1282994	1283078	849.22	197.646	137.413
gene-BW25113_1232	purU	CP009273.1	-	1283238	1284080	434.718	101.175	70.3421
gene-BW25113_1233	ychJ	CP009273.1	-	1284130	1284588	451.033	104.973	72.9821
gene-BW25113_1234	rssA	CP009273.1	+	1284701	1285606	238.158	55.4285	38.5366
gene-BW25113_1235	rssB	CP009273.1	+	1285698	1286711	134.935	31.4045	21.834
gene-BW25113_1236	galU	CP009273.1	+	1286913	1287821	1774.15	412.912	287.077
gene-BW25113_1237	hns	CP009273.1	-	1287965	1288378	16810.8	3912.52	2720.18
gene-BW25113_1238	tdk	CP009273.1	+	1288983	1289600	202.453	47.1186	32.7591
gene-BW25113_1241	adhE	CP009273.1	-	1290902	1293577	2532.88	589.499	409.848
gene-BW25113_1242	ychE	CP009273.1	+	1294054	1294701	91.7315	21.3494	14.8432
gene-BW25113_1243	oppA	CP009273.1	+	1295439	1297070	2121.07	493.654	343.212
gene-BW25113_1244	oppB	CP009273.1	+	1297156	1298076	834.987	194.333	135.11
gene-BW25113_1245	oppC	CP009273.1	+	1298091	1298999	1143.59	266.158	185.046
gene-BW25113_1246	oppD	CP009273.1	+	1299011	1300024	2083.07	484.809	337.063
gene-BW25113_1247	oppF	CP009273.1	+	1300021	1301025	2114.83	492.203	342.203
gene-BW25113_1248	yciU	CP009273.1	-	1301078	1301407	488.494	113.691	79.0437
gene-BW25113_1249	clsA	CP009273.1	-	1301442	1302902	323.233	75.2286	52.3026
gene-BW25113_1250	kch	CP009273.1	-	1303273	1304526	72.7943	16.942	11.7789
gene-BW25113_1251	yciI	CP009273.1	-	1304826	1305122	697.034	162.226	112.788
gene-BW25113_1252	tonB	CP009273.1	+	1305346	1306065	580.74	135.161	93.9702
gene-BW25113_1253	yciA	CP009273.1	-	1306105	1306503	299.842	69.7847	48.5178
gene-BW25113_1254	yciB	CP009273.1	-	1306608	1307147	316.311	73.6177	51.1826
gene-BW25113_1255	yciC	CP009273.1	-	1307177	1307920	259.679	60.4372	42.0189
gene-BW25113_1256	ompW	CP009273.1	+	1308277	1308915	403.033	93.8012	65.2152
gene-BW25113_1257	yciE	CP009273.1	-	1308975	1309481	32.8895	7.65466	5.32189
gene-BW25113_1258	yciF	CP009273.1	-	1309527	1310027	6.56287	1.52743	1.06194
gene-BW25113_1259	yciG	CP009273.1	-	1310113	1310292	7.9	1.83863	1.27831
gene-BW25113_1260	trpA	CP009273.1	-	1310673	1311479	0.639412	0.148816	0.103464
gene-BW25113_1261	trpB	CP009273.1	-	1311479	1312672	167.279	38.9323	27.0676
gene-BW25113_1262	trpC	CP009273.1	-	1312684	1314045	100.043	23.2837	16.188
gene-BW25113_1263	trpD	CP009273.1	-	1314046	1315641	26.682	6.20991	4.31743
gene-BW25113_1264	trpE	CP009273.1	-	1315641	1317203	14.3621	3.34262	2.32395
gene-BW25113_1265	trpL	CP009273.1	-	1317295	1317339	7.26667	1.69123	1.17583
gene-BW25113_1266	yciV	CP009273.1	+	1317477	1318358	179.489	41.7739	29.0432
gene-BW25113_1267	yciO	CP009273.1	+	1318355	1318975	403.507	93.9116	65.292
gene-BW25113_1268	yciQ	CP009273.1	+	1319003	1320898	43.3745	10.0949	7.01847
gene-BW25113_1269	rluB	CP009273.1	+	1321109	1321984	1178.55	274.293	190.702
gene-BW25113_1270	btuR	CP009273.1	-	1322024	1322614	191.511	44.572	30.9887
gene-BW25113_1271	yciK	CP009273.1	-	1322611	1323369	172.828	40.2238	27.9655
gene-BW25113_1272	sohB	CP009273.1	+	1323589	1324638	477.802	111.203	77.3136
gene-BW25113_1273	yciN	CP009273.1	-	1324674	1324925	1105.58	257.312	178.896
gene-BW25113_1274	topA	CP009273.1	+	1325305	1327902	1949.44	453.71	315.441
gene-BW25113_1275	cysB	CP009273.1	+	1328112	1329086	410.911	95.6347	66.4899
gene-BW25113_1276	acnA	CP009273.1	+	1330088	1332763	90.3946	21.0383	14.6268
gene-BW25113_1277	ribA	CP009273.1	-	1332827	1333417	648.904	151.025	105
gene-BW25113_1278	pgpB	CP009273.1	+	1333587	1334351	136.808	31.8404	22.137
[truncated: 3,264 more rows]

## Sheet: ASKA ygbE 1mM IPTG Triplicate 1
# Description of Variables from the StringTie Manual
[truncated: 4,500 more rows]

## Sheet: ASKA ygbE 1mM IPTG Triplicate 2
# Description of Variables from the StringTie Manual
[truncated: 4,500 more rows]

[truncated: 14 more sheets: ASKA ygbE 1mM IPTG Triplicate 3, ASKA yahA 1mM IPTG Triplicate 1, ASKA yahA 1mM IPTG Triplicate 2, ASKA yahA 1mM IPTG Triplicate 3, yrfF_KO Triplicate 1, yrfF_KO Triplicate 2, yrfF_KO Triplicate 3, BW25113_wt Solo, ASKA ygbE 1mM IPTG Solo, ASKA pdeB 1mM IPTG Solo, ASKA pdeC 1mM IPTG Solo, ASKA pdeN 1mM IPTG Solo, ASKA pdeO 1mM IPTG Solo, yrfF_KO Solo]
