# Supplementary material for: High-throughput mapping of the phage resistance landscape in E. coli
Source: PLoS Biol. 2020 Oct 13;18(10):e3000877. doi: 10.1371/journal.pbio.3000877 (PMC7553319; doi:10.1371/journal.pbio.3000877)
Supplement: S7 Table — RNA-seq, RNA sequencing. (XLSX) [file pbio.3000877.s015.xlsx]

## Sheet: Overview of DESeq2 Results
Overview of Sheets	Description
Summary of DESeq2 Results	This sheet describes a summary of high-effect size differential expression results observed in this study including effect size and confidence thresholds.
yahA_ASKA vs wt	This sheet describes high confidence, high effect size, differential gene expression levels of BW25113 + yahA ASKA plasmid induced with 0.1mM IPTG (N=3) over wildtype BW25113 (N=3). Differential expression was calculated with DESeq2 using transcripts from StringTie (S6 Table).
ygbE_ASKA vs wt	This sheet describes high confidence, high effect size, differential gene expression levels of BW25113 + ygbE ASKA plasmid induced with 0.1mM IPTG (N=3) over wildtype BW25113 (N=3). Differential expression was calculated with DESeq2 using transcripts from StringTie (S6 Table).
yrfF_kanR vs wt	This sheet describes high confidence, high effect size, differential gene expression levels of BW25113 yrfF::kanR disruption (N=3) over wildtype BW25113 (N=3). Differential expression was calculated with DESeq2 using transcripts from StringTie (S6 Table).
new gene names	yrfF (igaA) pdeN(rtn); gmr (pdeR); yjcC (pdeC); dosP (pdeO); pdeL (yahA); pdeB (ylaB); pdeI (yliE); dgcJ (yeaJ); yhbJ(rapZ)

## Sheet: Summary of DESeq2 Results
# Column descriptions
# Condition: Experimental condition (sheet) of summary
# padj_Threshold: Conservative statistical threshold used for significance cutoff (Bonferoni)
# Threshold_FC: Log2-fold-change effect size significance threshold
# Number_Genes_Up: Number of genes upregulated versus wildtype according to threshold values
# Number_Genes_Dn: Number of genes downregulated versus wildtype according to threshold values
Condition	padj_Threshold	Threshold_FC	Number_Genes_Up	Number_Genes_Dn	Notes
ygbE_ASKA vs wt	0.001	2	75	66	Includes lacI and overexpressed gene
yahA_ASKA vs wt	0.001	2	108	121	Includes lacI and overexpressed gene
yrfF_kanR vs wt	0.001	2	34	17

## Sheet: yahA_ASKA vs wt
# Diferential expression of yahA ASKA (1mM IPTG) versus BW25113 using DESeq2
# Differential regulation is considered if abs(log2_fold_change) > 2 & p_adj < 0.001 (Bonferoni) and is represented by Significant_Plot=TRUE
# Positive log2_fold_change is considered upregulated versus BW25113. Negative log2_fold_change is considered downregulated versus BW25113.
# For additional details of values, please refer to the DESeq2 manual
gene_id	gene_name	desc	baseMean	log2_fold_change	lfcSE	stat	p_value	q_value	p_adj	Significant_Plot
BW25113_0315	yahA	predicted DNA-binding transcriptional regulator (NCBI)	385493	11.3414	0.156798	72.331	0	0	0	TRUE
BW25113_2499	purM	phosphoribosylaminoimidazole synthetase (NCBI)	586.975	9.17075	0.431225	21.2667	2.30853e-100	2.72042e-98	1.03653e-96	TRUE
BW25113_3191	mlaB	orf, hypothetical protein (VIMSS)	101.857	6.1635	1.96266	3.14039				FALSE
BW25113_1744	astE	succinylglutamate desuccinylase (NCBI)	572.142	6.01048	0.274084	21.9293	1.36415e-106	1.85112e-104	6.12505e-103	TRUE
BW25113_3668	uhpB	sensor histidine protein kinase phosphorylates UhpA (VIMSS)	116.749	6.0082	1.5115	3.97498				FALSE
BW25113_1748	astC	succinylornithine transaminase, PLP-dependent (NCBI)	1632.79	5.98146	0.584606	10.2316	1.43145e-24	1.91917e-23	6.42722e-21	TRUE
BW25113_0345	lacI	transcriptional repressor of the lac operon (VIMSS)	60649.2	5.85147	0.159542	36.6766	1.725e-294	3.86228e-291	7.74527e-291	TRUE
BW25113_1747	astA	arginine succinyltransferase (NCBI)	1183.05	5.80313	0.420503	13.8005	2.5323e-43	7.92981e-42	1.137e-39	TRUE
BW25113_0897	ycaC	predicted hydrolase (NCBI)	894.088	5.68856	0.291366	19.5238	6.89474e-85	6.05385e-83	3.09574e-81	TRUE
BW25113_1745	astB	succinylarginine dihydrolase (NCBI)	1198.02	5.5285	0.987571	5.59808	2.16739e-08	9.55275e-08	9.7316e-05	TRUE
BW25113_2479	gcvR	transcriptional regulation of gcv operon (VIMSS)	67.3257	5.40661	1.72247	3.13886	0.00169605	0.00374134	7.61528	FALSE
BW25113_1746	astD	succinylglutamic semialdehyde dehydrogenase (NCBI)	1332.73	5.18131	0.235009	22.0473	1.01444e-107	1.46538e-105	4.55485e-104	TRUE
BW25113_2178	yejB	predicted oligopeptide transporter subunit (NCBI)	207.474	4.99006	1.84561	2.70375				FALSE
BW25113_0795	ybhG	hypothetical protein (NCBI)	452.616	4.70604	0.877393	5.36366	8.15526e-08	3.38141e-07	0.000366171	TRUE
BW25113_0073	leuB	3-isopropylmalate dehydrogenase (VIMSS)	57.7629	4.69945	1.25442	3.74633				FALSE
BW25113_1732	katE	hydroperoxidase HPII(III) (catalase) (NCBI)	1736.76	4.68212	0.180981	25.8707	1.42269e-147	4.2472e-145	6.38788e-144	TRUE
BW25113_2097	fbaB	orf, hypothetical protein (VIMSS)	1805.72	3.96397	0.15471	25.6219	8.70181e-145	2.43542e-142	3.90711e-141	TRUE
BW25113_4376	osmY	periplasmic protein (NCBI)	4639.87	3.68369	0.140792	26.164	6.82607e-151	2.35132e-148	3.0649e-147	TRUE
BW25113_2020	hisD	histidinol dehydrogenase (NCBI)	7184.83	3.55381	0.124809	28.4739	2.4665e-178	1.00409e-175	1.10746e-174	TRUE
BW25113_4568	ytjA	predicted protein (RefSeq)	858.057	3.49315	0.14862	23.5039	3.72441e-122	6.67116e-120	1.67226e-118	TRUE
BW25113_0871	poxB	pyruvate dehydrogenase (NCBI)	1157.9	3.48034	0.200431	17.3643	1.53839e-67	8.2999e-66	6.90738e-64	TRUE
BW25113_2019	hisG	ATP phosphoribosyltransferase (NCBI)	5849.35	3.43743	0.105506	32.5806	7.72296e-233	6.91669e-230	3.46761e-229	TRUE
BW25113_1702	ppsA	phosphoenolpyruvate synthase (NCBI)	31354.2	3.37344	0.287287	11.7424	7.72671e-32	1.49784e-30	3.46929e-28	TRUE
BW25113_2672	ygaM	orf, hypothetical protein (VIMSS)	673.771	3.37148	0.189533	17.7883	8.70295e-71	5.06127e-69	3.90762e-67	TRUE
BW25113_3443	yrhA	orf, hypothetical protein (VIMSS)	132.084	3.36469	0.968977	3.47241	0.000515804	0.00124516	2.31596	FALSE
BW25113_0325	yahK	predicted oxidoreductase, Zn-dependent and NAD(P)-binding (NCBI)	1219.31	3.31911	0.117223	28.3145	2.28819e-176	8.53876e-174	1.0274e-172	TRUE
BW25113_2465	tktB	transketolase 2, thiamin-binding (NCBI)	2385.57	3.29503	0.126984	25.9484	1.89728e-148	6.06857e-146	8.51877e-145	TRUE
BW25113_2021	hisC	histidinol-phosphate aminotransferase (NCBI)	66.6025	3.28814	0.364507	9.02079	1.86736e-19	1.89615e-18	8.38443e-16	TRUE
BW25113_1297	puuA	putative glutamine synthetase (EC 6.3.1.2) (VIMSS)	875.312	3.24912	0.268249	12.1123	9.08726e-34	1.94702e-32	4.08018e-30	TRUE
BW25113_1783	yeaG	conserved protein with nucleoside triphosphate hydrolase domain (NCBI)	1540.85	3.22077	0.131805	24.436	7.09324e-132	1.4438e-129	3.18487e-128	TRUE
BW25113_1301	puuB	gamma-Glu-putrescine oxidase, FAD/NAD(P)-binding (NCBI)	189.037	3.19848	0.248432	12.8747	6.2479e-38	1.65551e-36	2.80531e-34	TRUE
BW25113_3444	insA		699.403	3.188	0.146126	21.8168	1.6067e-105	2.11612e-103	7.21407e-102	TRUE
BW25113_2023	hisH	imidazole glycerol phosphate synthase subunit HisH (NCBI)	1345.76	3.18154	0.124719	25.5096	1.54283e-143	4.064e-141	6.92732e-140	TRUE
BW25113_3846	fadB	fused 3-hydroxybutyryl-CoA epimerase/delta(3)-cis-delta(2)-trans-enoyl-CoA isomerase/enoyl-CoA hydratase/3-hydroxyacyl-CoA dehydrogenase (NCBI)	2686.88	3.18068	0.61596	5.16378	2.42008e-07	9.41538e-07	0.00108661	FALSE
BW25113_1953	yodD	orf, hypothetical protein (VIMSS)	176.895	3.17232	0.234366	13.5358	9.61908e-42	2.87162e-40	4.31897e-38	TRUE
BW25113_2086	yegS	hypothetical protein (NCBI)	638.745	3.14693	0.167751	18.7596	1.61665e-78	1.13115e-76	7.25874e-75	TRUE
BW25113_1784	yeaH	hypothetical protein (NCBI)	361.786	3.14274	0.162558	19.3331	2.83068e-83	2.39166e-81	1.27098e-79	TRUE
BW25113_2022	hisB	imidazoleglycerolphosphate dehydratase and histidinol-phosphate phosphatase (VIMSS)	6834.34	3.13942	0.105828	29.6654	2.14631e-193	1.06791e-190	9.63693e-190	TRUE
BW25113_2024	hisA	N-(5'-phospho-L-ribosyl-formimino)-5-amino-1-(5'- phosphoribosyl)-4-imidazolecarboxamide isomerase (VIMSS)	3299.82	3.10549	0.107193	28.971	1.52787e-184	6.84181e-182	6.86015e-181	TRUE
BW25113_1596	ynfM	predicted transporter (NCBI)	957.384	3.10394	0.160697	19.3155	3.98085e-83	3.30116e-81	1.7874e-79	TRUE
BW25113_3555	yiaG	predicted transcriptional regulator (NCBI)	311.889	3.08272	0.173941	17.7228	2.7964e-70	1.60542e-68	1.25559e-66	TRUE
BW25113_2662	gabT	4-aminobutyrate aminotransferase (NCBI)	743.337	3.06847	0.203031	15.1133	1.32326e-51	5.06459e-50	5.94145e-48	TRUE
BW25113_2018	hisL		42.9329	3.06401	0.320955	9.54655	1.3409e-21	1.54757e-20	6.02065e-18	TRUE
BW25113_2256	arnD	hypothetical protein (NCBI)	757.403	3.0413	0.95961	3.16931	0.00152804	0.00339075	6.86088	FALSE
BW25113_2464	talA	transaldolase A (NCBI)	1238.79	2.99023	0.184955	16.1673	8.57075e-59	3.83798e-57	3.84827e-55	TRUE
BW25113_2659	csiD	orf, hypothetical protein (VIMSS)	219.271	2.97057	0.282453	10.5171	7.20849e-26	1.0119e-24	3.23661e-22	TRUE
BW25113_1954	dsrA	regulatory antisense RNA (NCBI)	13.1149	2.96339	0.557636	5.31421	1.07123e-07	4.36812e-07	0.000480983	TRUE
BW25113_4316	fimC	periplasmic chaperone, required for type 1 fimbriae (VIMSS)	540.01	2.93829	0.169783	17.3061	4.22825e-67	2.25406e-65	1.89848e-63	TRUE
BW25113_2025	hisF	imidazole glycerol phosphate synthase subunit HisF (NCBI)	4404.44	2.92885	0.125447	23.3473	1.46928e-120	2.3498e-118	6.59708e-117	TRUE
BW25113_2661	gabD	succinate-semialdehyde dehydrogenase I, NADP-dependent (NCBI)	707.452	2.89759	0.173308	16.7193	9.48213e-63	4.61532e-61	4.25748e-59	TRUE
BW25113_1300	puuC	gamma-Glu-gamma-aminobutyraldehyde dehydrogenase, NAD(P)H-dependent (NCBI)	300.785	2.89011	0.154089	18.7561	1.7253e-78	1.1886e-76	7.7466e-75	TRUE
BW25113_3845	fadA	acetyl-CoA acetyltransferase (NCBI)	1302.04	2.87516	0.33141	8.67554	4.11602e-18	3.93837e-17	1.84809e-14	TRUE
BW25113_3239	yhcO	predicted barnase inhibitor (NCBI)	119.658	2.84525	0.302466	9.40685	5.1124e-21	5.58373e-20	2.29547e-17	TRUE
BW25113_2026	hisI	bifunctional phosphoribosyl-AMP cyclohydrolase/phosphoribosyl-ATP pyrophosphatase protein (NCBI)	3289.59	2.82462	0.0829567	34.0494	4.14811e-254	4.64381e-251	1.8625e-250	TRUE
BW25113_1423	ydcJ	hypothetical protein (NCBI)	441.367	2.80946	0.20515	13.6947	1.09271e-42	3.35146e-41	4.90625e-39	TRUE
BW25113_4674	ynbG		1.09304	2.77728	1.92057	1.44607	0.148157	0.210485	665.226	FALSE
BW25113_1188	ycgB	hypothetical protein (NCBI)	690.571	2.74326	0.144151	19.0305	9.53393e-81	7.23609e-79	4.28073e-77	TRUE
BW25113_3447	ggt	gamma-glutamyltranspeptidase periplasmic precursor (NCBI)	731.93	2.73676	0.11636	23.5199	2.55524e-122	4.76765e-120	1.1473e-118	TRUE
BW25113_1020	phoH	conserved protein with nucleoside triphosphate hydrolase domain (NCBI)	878.538	2.72112	0.28207	9.64697	5.06274e-22	5.99761e-21	2.27317e-18	TRUE
BW25113_2660	lhgO	orf, hypothetical protein (VIMSS)	274.421	2.71827	0.291646	9.32043	1.15874e-20	1.23838e-19	5.20274e-17	TRUE
BW25113_4068	yjcH	conserved inner membrane protein involved in acetate transport (NCBI)	171.077	2.68277	0.374996	7.15413	8.42076e-13	5.68751e-12	3.78092e-09	TRUE
BW25113_1047	opgC	glucans biosynthesis protein (NCBI)	2433.99	2.67163	0.283949	9.40887	5.01498e-21	5.49073e-20	2.25173e-17	TRUE
BW25113_4314	fimA	major type 1 subunit fimbrin (pilin) (NCBI)	9978.49	2.66964	0.0782438	34.1195	3.79492e-255	5.66455e-252	1.70392e-251	TRUE
BW25113_4069	acs	acetyl-coenzyme A synthetase (NCBI)	1626.15	2.59971	0.599696	4.33504	1.45732e-05	4.46979e-05	0.0654338	FALSE
BW25113_1298	puuD	probable amidotransferase subunit (VIMSS)	713.364	2.58828	0.201145	12.8677	6.83721e-38	1.801e-36	3.06991e-34	TRUE
BW25113_4315	fimI	fimbrial protein (VIMSS)	1019.83	2.57929	0.0831401	31.0235	2.59992e-211	1.94041e-208	1.16737e-207	TRUE
BW25113_2131	osmF	predicted transporter subunit: periplasmic-binding component of ABC superfamily (NCBI)	378.724	2.57704	0.151661	16.992	9.40576e-65	4.73247e-63	4.22318e-61	TRUE
BW25113_1597	asr	acid shock protein (VIMSS)	255.037	2.57642	0.286525	8.99195	2.4289e-19	2.44969e-18	1.09058e-15	TRUE
BW25113_4466	yghJ	predicted inner membrane lipoprotein (NCBI)	3349.75	2.57615	0.10546	24.4277	8.68342e-132	1.69062e-129	3.89886e-128	TRUE
BW25113_1014	putA	fused DNA-binding transcriptional regulator/proline dehydrogenase/pyrroline-5-carboxylate dehydrogenase (NCBI)	25816.8	2.56513	0.543442	4.72015	2.35667e-06	8.02522e-06	0.0105814	FALSE
BW25113_1795	yeaQ	conserved inner membrane protein (NCBI)	931.595	2.55631	0.166074	15.3926	1.83625e-53	7.46433e-52	8.24478e-50	TRUE
BW25113_1051	msyB		692.929	2.52986	0.1081	23.4031	3.97846e-121	6.85213e-119	1.78633e-117	TRUE
BW25113_1487	ddpA	D-ala-D-a la transporter subunit (NCBI)	255.971	2.52886	0.304933	8.29316	1.10277e-16	9.6261e-16	4.95142e-13	TRUE
BW25113_0211	mltD	predicted membrane-bound lytic murein transglycosylase D (NCBI)	15366	2.52772	0.175903	14.37	7.98478e-47	2.77177e-45	3.58517e-43	TRUE
BW25113_1897	otsB	trehalose-6-phosphate phosphatase, biosynthetic (NCBI)	369.689	2.52709	0.157601	16.0347	7.31344e-58	3.21074e-56	3.28373e-54	TRUE
BW25113_4518	ymdF		280.134	2.51919	0.125887	20.0114	4.37946e-89	4.45709e-87	1.96638e-85	TRUE
BW25113_1536	ydeI		90.4729	2.5116	0.226227	11.1021	1.22479e-28	2.0164e-27	5.49931e-25	TRUE
BW25113_2310	argT	lysine/arginine/ornithine transporter subunit (NCBI)	2903.06	2.49873	0.518374	4.82032	1.43326e-06	5.01811e-06	0.00643536	FALSE
BW25113_3543	dppB	dipeptide transporter (NCBI)	1055.46	2.45871	0.30785	7.9867	1.38604e-15	1.11231e-14	6.22334e-12	TRUE
BW25113_0346	mhpR	DNA-binding transcriptional activator, 3HPP-binding (RefSeq)	798.287	2.44131	0.548433	4.45143	8.53016e-06	2.6919e-05	0.0383004	FALSE
BW25113_4427	micC		2.56192	2.43089	1.34109	1.81263	0.0698886	0.10916	313.8	FALSE
BW25113_1113	ldtC	hypothetical protein (NCBI)	1529.3	2.40527	0.134246	17.9168	8.71726e-72	5.20478e-70	3.91405e-68	TRUE
BW25113_1050	yceK		402.353	2.40215	0.148372	16.19	5.93467e-59	2.68439e-57	2.66467e-55	TRUE
BW25113_4317	fimD	outer membrane usher protein, type 1 fimbrial synthesis (NCBI)	840.618	2.39883	0.112115	21.3962	1.45079e-101	1.75584e-99	6.51403e-98	TRUE
BW25113_1755	ynjC	fused transporter subunits of ABC superfamily: membrane components (RefSeq)	186.624	2.39823	1.37406	1.74536	0.0809222	0.124014	363.341	FALSE
BW25113_4269	ahr	putative oxidoreductase (VIMSS)	713.29	2.39457	0.0976693	24.5171	9.70042e-133	2.17193e-130	4.35549e-129	TRUE
BW25113_2130	yehY	predicted transporter subunit: membrane component of ABC superfamily (NCBI)	177.715	2.39405	0.147646	16.2147	3.96753e-59	1.81292e-57	1.78142e-55	TRUE
BW25113_2266	elaB	hypothetical protein (NCBI)	1761.75	2.38497	0.139852	17.0535	3.28991e-65	1.67412e-63	1.47717e-61	TRUE
BW25113_1443	ydcV	predicted spermidine/putrescine transporter subunit (NCBI)	173.875	2.37567	0.285761	8.31348	9.29367e-17	8.19234e-16	4.17286e-13	TRUE
BW25113_4067	actP	acetate permease (NCBI)	640.098	2.36166	0.266408	8.86483	7.66218e-19	7.50793e-18	3.44032e-15	TRUE
BW25113_1480	sra	30S ribosomal subunit protein S22 (NCBI)	960.553	2.35551	0.132353	17.7973	7.41968e-71	4.37175e-69	3.33144e-67	TRUE
BW25113_0453	ybaY	glycoprotein/polysaccharide metabolism (VIMSS)	2279.12	2.34145	0.0935605	25.0261	3.18026e-138	7.49536e-136	1.42793e-134	TRUE
BW25113_0032	carA	carbamoyl-phosphate synthase small subunit (NCBI)	2476.89	2.31018	0.123669	18.6803	7.15718e-78	4.78356e-76	3.21358e-74	TRUE
BW25113_0329	yahO	hypothetical protein (NCBI)	350.868	2.30567	0.269764	8.54701	1.26323e-17	1.1736e-16	5.67192e-14	TRUE
BW25113_3453	ugpB	glycerol-3-phosphate transporter subunit (NCBI)	667.312	2.2793	0.361507	6.30501	2.88183e-10	1.52901e-09	1.29394e-06	TRUE
BW25113_2302	yfcG	predicted glutathione S-transferase (NCBI)	154.369	2.27505	0.183355	12.4079	2.36718e-35	5.72986e-34	1.06286e-31	TRUE
BW25113_1166	ariR		36.6996	2.27422	0.416721	5.45741	4.83118e-08	2.04868e-07	0.00021692	TRUE
BW25113_1445	ydcX		173.065	2.26847	0.275797	8.22512	1.94995e-16	1.66321e-15	8.75528e-13	TRUE
BW25113_2663	gabP	gamma-aminobutyrate transporter (NCBI)	193.242	2.25096	0.20252	11.1148	1.06336e-28	1.7571e-27	4.77451e-25	TRUE
BW25113_1440	ydcS	predicted spermidine/putrescine transporter subunit (NCBI)	384.952	2.21831	0.234316	9.46718	2.87503e-21	3.21859e-20	1.29089e-17	TRUE
BW25113_1441	ydcT	predicted spermidine/putrescine transporter subunit (NCBI)	186.583	2.21693	0.206528	10.7343	7.02579e-27	1.03833e-25	3.15458e-23	TRUE
BW25113_1469	narU	nitrate/nitrite transporter (NCBI)	103.094	2.20208	0.204776	10.7536	5.70124e-27	8.53852e-26	2.55986e-23	TRUE
BW25113_0720	gltA	citrate synthase (NCBI)	39765.4	2.1982	0.339176	6.48101	9.11099e-11	5.15139e-10	4.09084e-07	TRUE
BW25113_0898	ycaD	putative MFS family transporter protein (NCBI)	998.642	2.19537	0.227243	9.66092	4.41871e-22	5.31909e-21	1.984e-18	TRUE
BW25113_1055	yceA	hypothetical protein (NCBI)	4741.63	2.18935	0.289103	7.57291	3.64955e-14	2.68353e-13	1.63865e-10	TRUE
BW25113_2129	yehX	predicted transporter subunit: ATP-binding component of ABC superfamily (NCBI)	164.575	2.18804	0.159747	13.6969	1.05929e-42	3.27139e-41	4.75623e-39	TRUE
BW25113_2902	ygfF	predicted NAD(P)-binding oxidoreductase with NAD(P)-binding Rossmann-fold domain (NCBI)	483.121	2.16711	0.176368	12.2874	1.05836e-34	2.44295e-33	4.75202e-31	TRUE
BW25113_1488	ddpX	D-ala-D-ala dipeptidase, Zn-dependent (NCBI)	82.7035	2.15573	0.338879	6.36136	1.9998e-10	1.08284e-09	8.9791e-07	TRUE
BW25113_0812	dps	DNA protection during starvation conditions (NCBI)	5285.77	2.14184	0.117025	18.3024	7.92421e-75	4.99783e-73	3.55797e-71	TRUE
BW25113_2903	gcvP	glycine dehydrogenase (NCBI)	16029.5	2.13572	0.298188	7.16233	7.93191e-13	5.37354e-12	3.56143e-09	TRUE
BW25113_1481	bdm	orf, hypothetical protein (VIMSS)	126.611	2.11987	0.492777	4.30188	1.69352e-05	5.15188e-05	0.0760389	FALSE
BW25113_4484	cpxP	periplasmic protein combats stress (NCBI)	2749.75	2.1137	0.104211	20.283	1.8175e-91	1.9378e-89	8.16056e-88	TRUE
BW25113_1836	yebV	orf, hypothetical protein (VIMSS)	286.879	2.10444	0.144257	14.5881	3.34471e-48	1.19821e-46	1.50177e-44	TRUE
BW25113_1444	patD	medium chain aldehyde dehydrogenase (NCBI)	708.682	2.0932	0.164355	12.7358	3.7383e-37	9.67635e-36	1.67849e-33	TRUE
BW25113_1165	ymgA		63.0334	2.09212	0.46124	4.53587	5.73652e-06	1.85608e-05	0.025757	FALSE
BW25113_2306	hisP	histidine/lysine/arginine/ornithine transporter subunit (NCBI)	675.459	2.08236	0.276545	7.52991	5.07757e-14	3.67324e-13	2.27983e-10	TRUE
BW25113_2705	srlD	3-ketoacyl-(acyl-carrier-protein) reductase (NCBI)	9112.62	2.08175	0.237205	8.77613	1.6919e-18	1.63635e-17	7.59661e-15	TRUE
BW25113_4663	azuC		12.9072	2.07334	0.599727	3.45713	0.000545957	0.00131159	2.45135	FALSE
BW25113_1190	dadX	alanine racemase (NCBI)	10318.4	2.07082	0.379008	5.46378	4.66108e-08	1.97842e-07	0.000209282	TRUE
BW25113_3452	ugpA	glycerol-3-phosphate transporter subunit (NCBI)	110.711	2.04473	0.339149	6.02902	1.64961e-09	8.15338e-09	7.40676e-06	TRUE
BW25113_2666	yqaE	predicted membrane protein (NCBI)	263.269	2.03038	0.153217	13.2517	4.41224e-40	1.25051e-38	1.9811e-36	TRUE
BW25113_1454	yncG	predicted enzyme (NCBI)	56.4819	2.02227	0.265431	7.61882	2.55999e-14	1.90743e-13	1.14944e-10	TRUE
BW25113_1467	narY	nitrate reductase 2 (NRZ), beta subunit (NCBI)	156.517	2.01891	0.191364	10.5501	5.073e-26	7.1889e-25	2.27778e-22	TRUE
BW25113_1468	narZ	nitrate reductase 2 (NRZ), alpha subunit (NCBI)	429.003	2.016	0.128899	15.6402	3.87536e-55	1.63716e-53	1.74004e-51	TRUE
BW25113_1724	ydiZ	hypothetical protein (NCBI)	411.047	2.01153	0.177358	11.3416	8.15976e-30	1.43292e-28	3.66373e-26	TRUE
BW25113_2308	hisQ	histidine/lysine/arginine/ornithine transporter subunit (NCBI)	746.05	2.00057	0.186702	10.7153	8.62478e-27	1.27045e-25	3.87253e-23	TRUE
BW25113_0221	fadE	putative acyl-CoA dehydrogenase (EC 1.3.99.-) (VIMSS)	1095.31	1.98382	0.281976	7.0354	1.98685e-12	1.30075e-11	8.92096e-09	FALSE
BW25113_2309	hisJ	histidine/lysine/arginine/ornithine transporter subunit (NCBI)	2368.96	1.97739	0.18688	10.581	3.64874e-26	5.20352e-25	1.63828e-22	FALSE
BW25113_3542	dppC	dipeptide transporter (NCBI)	817.127	1.97205	0.222172	8.87624	6.91571e-19	6.80627e-18	3.10515e-15	FALSE
BW25113_1259	yciG	orf, hypothetical protein (VIMSS)	19.8704	1.96882	0.441098	4.46344	8.06526e-06	2.55781e-05	0.036213	FALSE
BW25113_2307	hisM	histidine/lysine/arginine/ornithine transporter subunit (NCBI)	448.312	1.96091	0.161243	12.1612	4.99962e-34	1.09211e-32	2.24483e-30	FALSE
BW25113_2998	yghW	hypothetical protein (NCBI)	80.7508	1.94326	0.222647	8.72796	2.593e-18	2.49708e-17	1.16425e-14	FALSE
BW25113_3524	yhjG	predicted outer membrane biogenesis protein (RefSeq)	729.615	1.93834	0.155142	12.494	8.05392e-36	2.00364e-34	3.61621e-32	FALSE
BW25113_1302	puuE	GABA aminotransferase, PLP-dependent (NCBI)	250.59	1.93517	0.174581	11.0846	1.48948e-28	2.41663e-27	6.68777e-25	FALSE
BW25113_2904	gcvH	glycine cleavage system protein H (NCBI)	7839.23	1.92385	0.254752	7.55187	4.29057e-14	3.13429e-13	1.92647e-10	FALSE
BW25113_4630	ykgP		2.77451	1.92267	1.11965	1.71721	0.0859414	0.130717	385.877	FALSE
BW25113_1967	hchA	chaperone protein HchA (NCBI)	473.13	1.9224	0.175388	10.9608	5.89531e-28	9.2955e-27	2.647e-24	FALSE
BW25113_0763	modA	molybdate transporter subunit (NCBI)	3350.28	1.92186	0.0907327	21.1816	1.41097e-99	1.62008e-97	6.33524e-96	FALSE
BW25113_2148	mglC	beta-methylgalactoside transporter inner membrane component (NCBI)	9894.16	1.92094	0.591827	3.24579	0.00117127	0.0026503	5.259	FALSE
BW25113_0722	sdhD	succinate dehydrogenase cytochrome b556 small membrane subunit (NCBI)	388.128	1.91903	0.403942	4.75075	2.02664e-06	6.94893e-06	0.00909962	FALSE
BW25113_3820	yigI	orf, hypothetical protein (VIMSS)	697.599	1.91203	0.366901	5.21128	1.87541e-07	7.41882e-07	0.000842061	FALSE
BW25113_1743	spy	envelope stress induced periplasmic protein (NCBI)	1150.77	1.90487	0.167768	11.3542	7.07163e-30	1.24672e-28	3.17516e-26	FALSE
BW25113_1195	ymgE	predicted inner membrane protein (NCBI)	40.639	1.9008	0.338782	5.61067	2.01546e-08	8.91821e-08	9.04941e-05	FALSE
BW25113_0304	rclA	putative oxidoreductase (VIMSS)	127.5	1.8957	0.277919	6.82105	9.03787e-12	5.55166e-11	4.05801e-08	FALSE
BW25113_1505	ydeT		81.9106	1.89505	0.356173	5.32059	1.03431e-07	4.22594e-07	0.000464404	FALSE
BW25113_0033	carB	carbamoyl-phosphate synthase large subunit (NCBI)	6576.49	1.8919	0.12284	15.4014	1.60108e-53	6.63856e-52	7.18886e-50	FALSE
BW25113_2127	mlrA	DNA-binding transcriptional regulator (NCBI)	247.464	1.88154	0.135229	13.9137	5.23298e-44	1.67381e-42	2.34961e-40	FALSE
BW25113_0721	sdhC	succinate dehydrogenase cytochrome b556 large membrane subunit (NCBI)	14396.8	1.88046	0.499751	3.76279	0.000168026	0.00044286	0.754436	FALSE
BW25113_0753	ybgS	hypothetical protein (NCBI)	281.19	1.87853	0.262489	7.15661	8.26959e-13	5.59384e-12	3.71305e-09	FALSE
BW25113_1189	dadA	D-amino acid dehydrogenase small subunit (NCBI)	18702.1	1.87732	0.548447	3.42297	0.000619404	0.00147537	2.78112	FALSE
BW25113_1955	yedP	hypothetical protein (NCBI)	215.018	1.87029	0.231733	8.07088	6.97924e-16	5.69272e-15	3.13368e-12	FALSE
BW25113_1519	tam	trans-aconitate 2-methyltransferase (NCBI)	225.624	1.85403	0.17371	10.6731	1.35962e-26	1.97035e-25	6.10468e-23	FALSE
BW25113_1482	osmC	osmotically inducible, stress-inducible membrane protein (NCBI)	1263.28	1.8474	0.157269	11.7468	7.33609e-32	1.42831e-30	3.29391e-28	FALSE
BW25113_2704	srlB	glucitol/sorbitol-specific enzyme IIA component of PTS (NCBI)	2900.69	1.84704	0.247272	7.46967	8.03932e-14	5.75081e-13	3.60965e-10	FALSE
BW25113_1627	rsxA	Na(+)-translocating NADH-quinone reductase subunit E (NCBI)	1319.66	1.84464	0.212955	8.66211	4.63125e-18	4.4125e-17	2.07943e-14	FALSE
BW25113_1486	ddpB	D-ala-D-ala transporter subunit (NCBI)	87.6334	1.84426	0.393215	4.69022	2.72913e-06	9.20259e-06	0.0122538	FALSE
BW25113_4318	fimF	minor component of type 1 fimbriae (NCBI)	149.159	1.83768	0.175618	10.4641	1.26323e-25	1.76773e-24	5.67188e-22	FALSE
BW25113_1442	ydcU	predicted spermidine/putrescine transporter subunit (NCBI)	140.918	1.82856	0.213794	8.55291	1.2002e-17	1.11736e-16	5.3889e-14	FALSE
BW25113_2665	ygaU	hypothetical protein (NCBI)	1126.93	1.82686	0.129309	14.1279	2.55745e-45	8.54646e-44	1.14829e-41	FALSE
BW25113_1415	aldA	aldehyde dehydrogenase A, NAD-linked (NCBI)	26028.6	1.82521	0.689854	2.64579	0.00814992	0.01584	36.5931	FALSE
BW25113_1062	pyrC	dihydroorotase (NCBI)	3619	1.80037	0.0999044	18.0209	1.3345e-72	8.18617e-71	5.99192e-69	FALSE
BW25113_1296	puuP	putative amino acid/amine transport protein (VIMSS)	340.977	1.7826	0.152694	11.6743	1.72458e-31	3.31444e-30	7.74334e-28	FALSE
BW25113_4680	ypdK		91.3278	1.76963	0.354169	4.99659	5.83545e-07	2.15426e-06	0.00262012	FALSE
BW25113_1927	amyA	cytoplasmic alpha-amylase (NCBI)	1332.48	1.76885	0.0927262	19.0761	3.99053e-81	3.08097e-79	1.79175e-77	FALSE
BW25113_3234	degQ	serine endoprotease, periplasmic (NCBI)	2957.15	1.76504	0.11462	15.399	1.66096e-53	6.82364e-52	7.4577e-50	FALSE
BW25113_1390	paaC	predicted multicomponent oxygenase/reductase subunit for phenylacetic acid degradation (NCBI)	152.104	1.76317	0.500109	3.52557	0.000422573	0.0010329	1.89735	FALSE
BW25113_1161	ycgX		108.92	1.75373	0.306703	5.718	1.07782e-08	4.95023e-08	4.83941e-05	FALSE
BW25113_4430	rydB		20.6958	1.7464	0.376808	4.63472	3.57414e-06	1.18293e-05	0.0160479	FALSE
BW25113_3541	dppD	dipeptide transporter (NCBI)	1602.66	1.74235	0.210016	8.29627	1.07433e-16	9.39619e-16	4.82374e-13	FALSE
BW25113_1703	ppsR	hypothetical protein (NCBI)	1176.82	1.72054	0.153835	11.1843	4.86781e-29	8.22568e-28	2.18565e-25	FALSE
BW25113_1515	lsrD	AI2 transporter (NCBI)	63.8795	1.71652	0.273164	6.28383	3.30322e-10	1.74226e-09	1.48315e-06	FALSE
BW25113_2210	mqo	malate:quinone oxidoreductase (NCBI)	15362.3	1.70945	0.282266	6.05617	1.39404e-09	6.95159e-09	6.25926e-06	FALSE
BW25113_4015	aceA	isocitrate lyase (NCBI)	3629.62	1.70088	0.325826	5.22022	1.7871e-07	7.10714e-07	0.000802408	FALSE
BW25113_3588	aldB	aldehyde dehydrogenase B (lactaldehyde dehydrogenase) (VIMSS)	236.567	1.69473	0.240219	7.05495	1.72668e-12	1.13874e-11	7.75278e-09	FALSE
BW25113_4165	glyY		807.702	1.6879	0.566646	2.97876	0.00289418	0.00612483	12.9949	FALSE
BW25113_1167	ymgC		16.0896	1.68558	0.586999	2.87151	0.0040851	0.00836445	18.3421	FALSE
BW25113_1392	paaE	predicted multicomponent oxygenase/reductase subunit for phenylacetic acid degradation (NCBI)	168.632	1.68437	0.340953	4.94019	7.80477e-07	2.82537e-06	0.00350434	FALSE
BW25113_1490	dosC	predicted diguanylate cyclase (RefSeq)	393.634	1.67871	0.153363	10.946	6.94424e-28	1.08728e-26	3.11796e-24	FALSE
BW25113_1422	ydcI	putative transcriptional regulator LYSR-type (VIMSS)	3205.78	1.67802	0.753195	2.22787	0.0258895	0.0449179	116.244	FALSE
BW25113_0854	potF	putrescine transporter subunit: periplasmic-binding component of ABC superfamily (NCBI)	302.297	1.67617	0.295736	5.66781	1.44632e-08	6.54865e-08	6.49397e-05	FALSE
BW25113_0022	insA		581.877	1.67183	0.137199	12.1854	3.71805e-34	8.24229e-33	1.6694e-30	FALSE
BW25113_2497	uraA	uracil transporter (NCBI)	3482.99	1.67084	0.186837	8.94275	3.79589e-19	3.76896e-18	1.70435e-15	FALSE
BW25113_0726	sucA	alpha-ketoglutarate decarboxylase (NCBI)	118555	1.66965	0.175141	9.53314	1.52592e-21	1.75207e-20	6.85138e-18	FALSE
BW25113_0970	yccA	inner membrane protein (NCBI)	17186	1.66934	0.0867241	19.2489	1.4431e-82	1.17495e-80	6.47953e-79	FALSE
BW25113_2979	glcD	glycolate oxidase subunit, FAD-linked (NCBI)	128.186	1.66482	0.199715	8.336	7.6844e-17	6.80054e-16	3.45029e-13	FALSE
BW25113_1449	curA	predicted oxidoreductase, Zn-dependent and NAD(P)-binding (RefSeq)	744.325	1.66174	0.149049	11.149	7.24325e-29	1.2148e-27	3.25222e-25	FALSE
BW25113_4126	yjdI	hypothetical protein (NCBI)	188.034	1.65953	0.152667	10.8703	1.59678e-27	2.45717e-26	7.16952e-24	FALSE
BW25113_1136	icd		85922.7	1.65881	0.159006	10.4324	1.76394e-25	2.41557e-24	7.92009e-22	FALSE
BW25113_1231	tyrT		1774.14	1.65635	0.384137	4.31187	1.61877e-05	4.94463e-05	0.0726826	FALSE
BW25113_3073	patA	putrescine:2-oxoglutaric acid aminotransferase, PLP-dependent (RefSeq)	459.789	1.65518	0.172021	9.62196	6.45891e-22	7.57146e-21	2.90005e-18	FALSE
BW25113_0161	degP	serine endoprotease (protease Do), membrane-associated (NCBI)	9350.51	1.6551	0.171499	9.65077	4.87881e-22	5.82595e-21	2.19059e-18	FALSE
BW25113_0906	ycaP	conserved inner membrane protein (NCBI)	249.817	1.65409	0.19664	8.41176	4.03899e-17	3.65386e-16	1.81351e-13	FALSE
BW25113_2149	mglA	fused methyl-galactoside transporter subunits of ABC superfamily: ATP-binding components (NCBI)	20822.5	1.63322	0.689792	2.3677	0.0178992	0.0322675	80.3674	FALSE
BW25113_1739	osmE	DNA-binding transcriptional activator (NCBI)	1827.2	1.62932	0.1407	11.5801	5.19864e-31	9.74469e-30	2.33419e-27	FALSE
BW25113_4127	yjdJ	predicted acyltransferase with acyl-CoA N-acyltransferase domain (NCBI)	272.32	1.62899	0.163662	9.95336	2.43816e-23	3.10173e-22	1.09473e-19	FALSE
BW25113_4319	fimG	minor component of type 1 fimbriae (NCBI)	153.996	1.62541	0.223742	7.26465	3.74017e-13	2.59264e-12	1.67933e-09	FALSE
BW25113_4164	glyX		1732.48	1.62232	0.59449	2.72892	0.00635423	0.0126183	28.5305	FALSE
BW25113_4163	glyV	tRNA-Gly (NCBI)	1761.53	1.62209	0.589584	2.75124	0.00593706	0.0118319	26.6574	FALSE
BW25113_2357	yfdN	CPS-53 (KpLE1) prophage; predicted protein (NCBI)	4.84314	1.6183	1.16479	1.38936	0.164725	0.231743	739.613	FALSE
BW25113_4425	rttR		566.951	1.61413	0.430982	3.74524	0.000180222	0.000471124	0.809199	FALSE
BW25113_2980	glcC	DNA-binding transcriptional dual regulator, glycolate-binding (NCBI)	1137.41	1.60539	0.391454	4.10109	4.11211e-05	0.000119572	0.184634	FALSE
BW25113_0821	ybiU	hypothetical protein (NCBI)	1796.77	1.60495	0.122931	13.0557	5.89269e-39	1.62886e-37	2.64582e-35	FALSE
BW25113_1230	tyrV		1397.86	1.60007	0.383406	4.17331	3.00205e-05	8.86752e-05	0.134792	FALSE
BW25113_3171	metY		677.449	1.59479	0.377313	4.2267	2.37146e-05	7.08431e-05	0.106478	FALSE
BW25113_1986	asnU		36.8952	1.59027	0.417382	3.8101	0.000138908	0.000369597	0.623698	FALSE
BW25113_1388	paaA	predicted multicomponent oxygenase/reductase subunit for phenylacetic acid degradation (NCBI)	187.456	1.58788	0.720769	2.20303	0.0275924	0.0476325	123.89	FALSE
BW25113_0837	yliI	predicted dehydrogenase (NCBI)	333.229	1.58739	0.15052	10.546	5.29811e-26	7.4842e-25	2.37885e-22	FALSE
BW25113_4218	ytfL	predicted inner membrane protein (NCBI)	2045.23	1.58456	0.185663	8.53458	1.40665e-17	1.30144e-16	6.31584e-14	FALSE
BW25113_1525	sad	putative aldehyde dehydrogenase (VIMSS)	825.914	1.57489	0.119936	13.1311	2.1836e-39	6.11134e-38	9.80435e-36	FALSE
BW25113_1450	mcbR	orf, hypothetical protein (VIMSS)	207.111	1.57316	0.159878	9.83973	7.59144e-23	9.41675e-22	3.40856e-19	FALSE
BW25113_3544	dppA	dipeptide transporter (NCBI)	13887.5	1.56766	0.316328	4.95579	7.20359e-07	2.62685e-06	0.00323441	FALSE
BW25113_1389	paaB		66.0911	1.55476	0.659942	2.3559	0.018478	0.0331907	82.9662	FALSE
BW25113_1730	ydjO		61.267	1.55443	0.506456	3.06923	0.00214612	0.00464941	9.63609	FALSE
BW25113_2977	glcG	hypothetical protein (NCBI)	349.349	1.55326	0.136034	11.4181	3.39474e-30	6.10508e-29	1.52424e-26	FALSE
BW25113_0865	ybjP	predicted lipoprotein (NCBI)	943.905	1.55031	0.176186	8.79928	1.37703e-18	1.3347e-17	6.18285e-15	FALSE
BW25113_3728	pstS	phosphate transporter subunit (NCBI)	3800.53	1.55018	0.199438	7.77276	7.67957e-15	5.90878e-14	3.44813e-11	FALSE
BW25113_0723	sdhA	succinate dehydrogenase flavoprotein subunit (NCBI)	64569.6	1.54976	0.27888	5.55709	2.74302e-08	1.19139e-07	0.000123162	FALSE
BW25113_1814	sdaA	L-serine deaminase I (NCBI)	16203.1	1.54327	0.177388	8.69995	3.3202e-18	3.1837e-17	1.49077e-14	FALSE
BW25113_2922	yggE	hypothetical protein (NCBI)	7978.5	1.54136	0.0880915	17.4973	1.5026e-68	8.20568e-67	6.74669e-65	FALSE
BW25113_0863	artI	arginine transporter subunit (NCBI)	4016.98	1.53957	0.0832596	18.4912	2.43022e-76	1.60037e-74	1.09117e-72	FALSE
BW25113_0727	sucB	dihydrolipoamide acetyltransferase (NCBI)	90878.1	1.53307	0.139663	10.9769	4.93453e-28	7.80807e-27	2.21561e-24	FALSE
BW25113_1660	ydhC	predicted transporter (NCBI)	2183.91	1.52933	0.219323	6.97299	3.10285e-12	1.99348e-11	1.39318e-08	FALSE
BW25113_1973	zinT	conserved metal-binding protein (NCBI)	210.717	1.52254	0.205582	7.406	1.30169e-13	9.25231e-13	5.84458e-10	FALSE
BW25113_0935	ssuD	alkanesulfonate monooxygenase (NCBI)	72.924	1.51646	0.268683	5.64404	1.66107e-08	7.4532e-08	7.45823e-05	FALSE
BW25113_1685	ydiH	predicted protein (RefSeq)	190.227	1.51561	0.156459	9.68694	3.42625e-22	4.14669e-21	1.53839e-18	FALSE
BW25113_0724	sdhB	succinate dehydrogenase, FeS subunit (NCBI)	30669.4	1.51335	0.235683	6.42112	1.35272e-10	7.4876e-10	6.0737e-07	FALSE
BW25113_1164	ycgZ	hypothetical protein (NCBI)	61.479	1.50472	0.377553	3.98546	6.73494e-05	0.00018873	0.302399	FALSE
BW25113_3451	ugpE	glycerol-3-phosphate transporter subunit (NCBI)	165.151	1.48959	0.278825	5.34236	9.17455e-08	3.7726e-07	0.000411937	FALSE
BW25113_2067	yegE	predicted diguanylate cyclase, GGDEF domain signalling protein (NCBI)	1513	1.48833	0.121345	12.2652	1.39249e-34	3.16526e-33	6.25227e-31	FALSE
BW25113_3347	fkpA	FKBP-type peptidyl-prolyl cis-trans isomerase (rotamase) (NCBI)	53611.1	1.48524	0.0785273	18.9137	8.80273e-80	6.46207e-78	3.95242e-76	FALSE
BW25113_1520	yneE	orf, hypothetical protein (VIMSS)	210.622	1.48516	0.309987	4.79105	1.65912e-06	5.76827e-06	0.00744944	FALSE
BW25113_3515	gadW	DNA-binding transcriptional activator (NCBI)	689.728	1.48368	0.102599	14.461	2.13676e-47	7.4753e-46	9.59403e-44	FALSE
BW25113_1777	yeaC	orf, hypothetical protein (VIMSS)	4205.77	1.46812	0.181997	8.06673	7.22048e-16	5.87878e-15	3.242e-12	FALSE
BW25113_4111	proP	proline/glycine betaine transporter (NCBI)	9301.18	1.46464	0.162988	8.9862	2.55923e-19	2.56956e-18	1.1491e-15	FALSE
BW25113_1276	acnA	aconitate hydratase (NCBI)	4876.67	1.4632	0.13805	10.5991	3.00968e-26	4.31016e-25	1.35135e-22	FALSE
BW25113_0707	ybgA	hypothetical protein (NCBI)	224.621	1.46173	0.130902	11.1665	5.94555e-29	1.00091e-27	2.66955e-25	FALSE
BW25113_4014	aceB	malate synthase (NCBI)	5120.99	1.45451	0.513585	2.83207	0.00462477	0.00941351	20.7652	FALSE
BW25113_0728	sucC	succinyl-CoA synthetase subunit beta (NCBI)	70262.4	1.45388	0.148383	9.79819	1.14624e-22	1.41013e-21	5.14662e-19	FALSE
BW25113_0855	potG	ATP-binding component of putrescine transport system (VIMSS)	180.034	1.45343	0.2367	6.14039	8.23204e-10	4.20119e-09	3.69619e-06	FALSE
BW25113_1963	yedR	orf, hypothetical protein (VIMSS)	82.7924	1.45329	0.295844	4.91237	8.99834e-07	3.22614e-06	0.00404025	FALSE
BW25113_2989	yghU	orf, hypothetical protein (VIMSS)	1550.56	1.44999	0.131414	11.0337	2.62704e-28	4.21644e-27	1.17954e-24	FALSE
BW25113_0862	artQ	arginine transporter subunit (NCBI)	1576.29	1.44963	0.0763757	18.9803	2.48075e-80	1.85147e-78	1.11386e-76	FALSE
BW25113_1896	otsA	trehalose-6-phosphate synthase (NCBI)	855.463	1.44805	0.116368	12.4437	1.51248e-35	3.70102e-34	6.79102e-32	FALSE
BW25113_0729	sucD	succinyl-CoA synthetase subunit alpha (NCBI)	54751.1	1.44777	0.154573	9.36628	7.5133e-21	8.10712e-20	3.37347e-17	FALSE
BW25113_4704	arrS		4.69401	1.44777	0.829998	1.74431	0.0811057	0.12413	364.165	FALSE
BW25113_2401	valU		394.228	1.44611	0.342964	4.2165	2.4812e-05	7.40228e-05	0.111406	FALSE
BW25113_2706	srlM	DNA-binding transcriptional activator of glucitol operon (NCBI)	725.111	1.44382	0.317908	4.54163	5.58206e-06	1.81003e-05	0.0250635	FALSE
BW25113_0819	ldtB	hypothetical protein (NCBI)	8462.75	1.44125	0.113386	12.711	5.13428e-37	1.32134e-35	2.30529e-33	FALSE
BW25113_0749	lysQ		394.521	1.43876	0.370946	3.87862	0.000105052	0.000284931	0.471681	FALSE
BW25113_1503	ydeR	predicted fimbrial-like adhesin protein (NCBI)	25.8753	1.42699	0.611675	2.33293	0.019652	0.0350883	88.2373	FALSE
BW25113_4679	yohP	expressed protein (RefSeq)	17.375	1.42587	0.469961	3.03401	0.00241327	0.00519049	10.8356	FALSE
BW25113_4149	blc	outer membrane lipoprotein (lipocalin) (NCBI)	311.682	1.42524	0.176296	8.08432	6.25137e-16	5.14589e-15	2.80687e-12	FALSE
BW25113_0773	ybhB	predicted kinase inhibitor (NCBI)	923.824	1.42403	0.112127	12.7002	5.9006e-37	1.50988e-35	2.64937e-33	FALSE
BW25113_3249	mreD		8.37782	1.41558	0.899292	1.5741	0.115464	0.169634	518.431	FALSE
BW25113_0936	ssuA	orf, hypothetical protein (VIMSS)	41.3078	1.40896	0.638242	2.20757	0.0272742	0.0471378	122.461	FALSE
BW25113_1517	lsrF	hypothetical protein (NCBI)	109.432	1.4024	0.248079	5.65302	1.57655e-08	7.11671e-08	7.07869e-05	FALSE
BW25113_1778	msrB	methionine sulfoxide reductase B (NCBI)	6462.49	1.40229	0.198854	7.05184	1.76569e-12	1.16105e-11	7.92794e-09	FALSE
BW25113_2404	lysV		498.846	1.40011	0.381941	3.66578	0.000246591	0.000627049	1.10719	FALSE
BW25113_3540	dppF	dipeptide transporter (NCBI)	1625.51	1.3988	0.0888136	15.7498	6.8889e-56	2.93795e-54	3.09312e-52	FALSE
BW25113_0801	ybiC	predicted dehydrogenase (NCBI)	1308.88	1.39357	0.116497	11.9623	5.60164e-33	1.17216e-31	2.51514e-29	FALSE
BW25113_1628	rsxB	electron transport complex protein RnfB (NCBI)	1826.33	1.3879	0.222409	6.24031	4.36698e-10	2.27652e-09	1.96077e-06	FALSE
BW25113_1299	puuR	DNA-binding transcriptional repressor (NCBI)	968.171	1.38747	0.149127	9.30394	1.35338e-20	1.43953e-19	6.07667e-17	FALSE
BW25113_2254	arnC	undecaprenyl phosphate-L-Ara4FN transferase (NCBI)	1981.04	1.38334	0.169809	8.14645	3.74755e-16	3.11346e-15	1.68265e-12	FALSE
BW25113_4368	leuV		643.605	1.38332	0.385604	3.58741	0.000333982	0.000829491	1.49958	FALSE
BW25113_4107	yjdN	hypothetical protein (NCBI)	50.2844	1.37858	0.296165	4.65476	3.24361e-06	1.07992e-05	0.0145638	FALSE
BW25113_1701	fadK	short chain acyl-CoA synthetase, anaerobic (RefSeq)	142.366	1.37683	0.174285	7.8999	2.79131e-15	2.2123e-14	1.2533e-11	FALSE
BW25113_3757	gltU		624.223	1.36773	0.293114	4.66621	3.06801e-06	1.02833e-05	0.0137754	FALSE
BW25113_2905	gcvT	glycine cleavage system aminomethyltransferase T (NCBI)	16431.2	1.36729	0.243903	5.60588	2.07199e-08	9.15931e-08	9.30324e-05	FALSE
BW25113_3547	yhjX	predicted transporter (NCBI)	14301.9	1.36686	0.862924	1.58399	0.113197	0.166684	508.253	FALSE
BW25113_1394	paaG	enoyl-CoA hydratase (NCBI)	99.468	1.36625	0.220028	6.20944	5.3173e-10	2.75589e-09	2.38747e-06	FALSE
BW25113_1723	pfkB	6-phosphofructokinase II; suppressor of pfkA (VIMSS)	2087.6	1.36355	0.141719	9.6215	6.48773e-22	7.58539e-21	2.91299e-18	FALSE
BW25113_0238	gpt	xanthine phosphoribosyltransferase (NCBI)	4792.47	1.35852	0.206093	6.59176	4.34633e-11	2.5211e-10	1.9515e-07	FALSE
BW25113_1395	paaH	3-hydroxybutyryl-CoA dehydrogenase (NCBI)	218.138	1.35467	0.184579	7.33923	2.14819e-13	1.50777e-12	9.64536e-10	FALSE
BW25113_0953	rmf	ribosome modulation factor (NCBI)	1169.97	1.35271	0.0798937	16.9313	2.64427e-64	1.31567e-62	1.18728e-60	FALSE
BW25113_0764	modB	molybdate ABC transporter permease protein (NCBI)	1440.35	1.34885	0.0836828	16.1187	1.88662e-58	8.36463e-57	8.47092e-55	FALSE
BW25113_1586	ynfD	orf, hypothetical protein (VIMSS)	258.464	1.34783	0.192061	7.0177	2.25549e-12	1.4659e-11	1.01271e-08	FALSE
BW25113_1929	yedE	predicted inner membrane protein (NCBI)	7032.8	1.34535	0.241352	5.57425	2.48596e-08	1.08818e-07	0.00011162	FALSE
BW25113_3024	ygiW	hypothetical protein (NCBI)	11172	1.34226	0.122584	10.9497	6.66362e-28	1.04701e-26	2.99196e-24	FALSE
BW25113_2027	wzzB	regulator of length of O-antigen component of lipopolysaccharide chains (VIMSS)	27688.5	1.3385	0.102315	13.0822	4.16386e-39	1.15812e-37	1.86957e-35	FALSE
BW25113_1391	paaD	predicted multicomponent oxygenase/reductase subunit for phenylacetic acid degradation (RefSeq)	94.6326	1.33718	0.397562	3.36344	0.000769778	0.00180853	3.4563	FALSE
BW25113_4094	phnN	ribose 1,5-bisphosphokinase (NCBI)	37.1118	1.3305	1.22141	1.08932	0.276013	0.359424	1239.3	FALSE
BW25113_0747	lysY		2412.12	1.32713	0.307476	4.3162	1.58739e-05	4.85874e-05	0.0712738	FALSE
BW25113_4134	pheU		25.5822	1.32691	0.478803	2.77131	0.0055832	0.0112064	25.0686	FALSE
BW25113_1619	hdhA	7-alpha-hydroxysteroid dehydrogenase (NCBI)	1202.53	1.32351	0.132491	9.98942	1.69577e-23	2.16962e-22	7.61402e-20	FALSE
BW25113_4093	phnO	predicted acyltransferase with acyl-CoA N-acyltransferase domain (NCBI)	260.612	1.32341	0.161928	8.17284	3.01204e-16	2.52111e-15	1.35241e-12	FALSE
BW25113_2582	trxC	thioredoxin 2 (NCBI)	1429.33	1.3225	0.175346	7.54225	4.61927e-14	3.36343e-13	2.07405e-10	FALSE
BW25113_2601	aroF	3-deoxy-D-arabino-heptulosonate-7-phosphate synthase, tyrosine-repressible (NCBI)	3572.09	1.31885	0.0857336	15.3832	2.12352e-53	8.49028e-52	9.53459e-50	FALSE
BW25113_4706	iroK		8.07649	1.31538	1.23708	1.0633	0.287646	0.371311	1291.53	FALSE
BW25113_2396	alaX		106.123	1.30901	0.376582	3.47604	0.00050888	0.00123044	2.28487	FALSE
BW25113_1484	ddpD	D-ala-D-ala transporter subunit (NCBI)	125.151	1.30429	0.253361	5.14794	2.63366e-07	1.01668e-06	0.00118251	FALSE
BW25113_0581	ybdK	gamma-glutamyl:cysteine ligase (NCBI)	368.034	1.30328	0.205578	6.33959	2.30382e-10	1.23848e-09	1.03442e-06	FALSE
BW25113_1611	fumC	fumarate hydratase (NCBI)	2521.19	1.30056	0.327473	3.9715	7.14221e-05	0.000199022	0.320685	FALSE
BW25113_4320	fimH	minor component of type 1 fimbriae (NCBI)	276	1.29946	0.201801	6.43928	1.20038e-10	6.71075e-10	5.38972e-07	FALSE
BW25113_1514	lsrC	AI2 transporter (NCBI)	55.0495	1.29697	0.60131	2.1569	0.0310132	0.0528251	139.249	FALSE
BW25113_1393	paaF	enoyl-CoA hydratase-isomerase (NCBI)	80.8597	1.28974	1.21248	1.06372	0.287456	0.37123	1290.68	FALSE
BW25113_0330	prpR	DNA-binding transcriptional activator (NCBI)	154.871	1.28927	0.280504	4.59625	4.30172e-06	1.4164e-05	0.0193147	FALSE
BW25113_2091	gatD	galactitol-1-phosphate dehydrogenase, Zn-dependent and NAD(P)-binding (NCBI)	51405.8	1.28707	0.182996	7.03335	2.01627e-12	1.31616e-11	9.05305e-09	FALSE
BW25113_2311	ubiX		779.928	1.28657	0.209925	6.12875	8.85745e-10	4.49192e-09	3.977e-06	FALSE
BW25113_4658	yghX		95.1026	1.28636	0.256198	5.02096	5.14128e-07	1.91696e-06	0.00230843	FALSE
BW25113_0746	valZ	tRNA-Val (NCBI)	2939.96	1.28326	0.294778	4.3533	1.34103e-05	4.13293e-05	0.0602123	FALSE
BW25113_2476	purC	phosphoribosylaminoimidazole-succinocarboxamidesynthase (NCBI)	1821.49	1.27907	0.10695	11.9596	5.78482e-33	1.19928e-31	2.59738e-29	FALSE
BW25113_1989	asnV	tRNA-Asn (NCBI)	24.1287	1.27795	0.570506	2.24003	0.0250892	0.0436478	112.65	FALSE
BW25113_2137	yohF	predicted oxidoreductase with NAD(P)-binding Rossmann-fold domain (NCBI)	182.636	1.27584	0.203213	6.27835	3.4219e-10	1.7964e-09	1.53643e-06	FALSE
BW25113_0864	artP	arginine transporter subunit (NCBI)	2596.36	1.27469	0.0708259	17.9975	2.0379e-72	1.23321e-70	9.15018e-69	FALSE
BW25113_1033	ghrA	putative dehydrogenase (VIMSS)	1741.27	1.26442	0.123705	10.2212	1.59289e-24	2.12924e-23	7.15206e-21	FALSE
BW25113_1455	yncH		2.33945	1.26373	1.38211	0.91435	0.360533	0.448837	1618.79	FALSE
BW25113_3797	hisR		5025.66	1.26181	0.328121	3.84557	0.000120273	0.000323279	0.540026	FALSE
BW25113_4016	aceK	bifunctional isocitrate dehydrogenase kinase/phosphatase protein (NCBI)	917.088	1.26034	0.244748	5.14952	2.61149e-07	1.00987e-06	0.00117256	FALSE
BW25113_2312	purF	amidophosphoribosyltransferase (NCBI)	2984.33	1.25955	0.0965858	13.0407	7.17973e-39	1.97244e-37	3.2237e-35	FALSE
BW25113_3799	proM		578.197	1.25942	0.337338	3.7334	0.000188914	0.000491548	0.848222	FALSE
BW25113_3798	leuT		6136.92	1.25411	0.321857	3.89649	9.75971e-05	0.000266001	0.438211	FALSE
BW25113_2816	metV		744.057	1.25313	0.361162	3.46972	0.000520995	0.00125634	2.33927	FALSE
BW25113_3796	argX		2909.02	1.25044	0.337605	3.70385	0.000212352	0.000546186	0.953459	FALSE
BW25113_0301	rclC	orf, hypothetical protein (VIMSS)	67.0599	1.24898	0.312971	3.99072	6.5873e-05	0.00018494	0.29577	FALSE
BW25113_4370	leuQ	tRNA-Leu (NCBI)	1319.02	1.2487	0.321131	3.88843	0.000100895	0.000274656	0.453021	FALSE
BW25113_2691	argQ		1296.75	1.24698	0.338928	3.67918	0.000233989	0.000597379	1.05061	FALSE
BW25113_1459	yncI		80.9462	1.24204	0.215798	5.75555	8.63602e-09	4.00747e-08	3.87757e-05	FALSE
BW25113_1530	marR	multiple antibiotic resistance protein; repressor of mar operon (VIMSS)	799.45	1.2409	0.118725	10.4519	1.43571e-25	2.00283e-24	6.44633e-22	FALSE
BW25113_1501	ydeP	putative oxidoreductase, major subunit, acid resistance protein (Katherine Huang)	237.814	1.23772	0.15755	7.85602	3.96547e-15	3.11533e-14	1.7805e-11	FALSE
BW25113_1485	ddpC	D-ala-D-ala transporter subunit (NCBI)	132.191	1.23596	0.22841	5.41113	6.26286e-08	2.63087e-07	0.000281203	FALSE
BW25113_2403	valY		679.766	1.23437	0.349911	3.52766	0.000419245	0.00102645	1.88241	FALSE
BW25113_2092	gatC	galactitol-specific enzyme IIC component of PTS (NCBI)	108365	1.23318	0.180057	6.84881	7.44692e-12	4.64447e-11	3.34367e-08	FALSE
BW25113_1968	yedV	predicted sensory kinase in two-component regulatory system with YedW (NCBI)	311.507	1.23134	1.51652	0.811953	0.416818	0.504054	1871.51	FALSE
BW25113_1397	paaJ	acetyl-CoA acetyltransferase (NCBI)	535.67	1.22583	0.332158	3.6905	0.000223813	0.000573689	1.00492	FALSE
BW25113_1504	ydeS	predicted fimbrial-like adhesin protein (NCBI)	27.9334	1.22214	0.423196	2.88788	0.00387854	0.007989	17.4146	FALSE
BW25113_4045	yjbJ	predicted stress response protein (NCBI)	1002.39	1.22062	0.110829	11.0136	3.28768e-28	5.23923e-27	1.47617e-24	FALSE
BW25113_0347	mhpA	3-(3-hydroxyphenyl)propionate hydroxylase (NCBI)	84.8798	1.2206	0.232015	5.26087	1.43375e-07	5.75816e-07	0.000643755	FALSE
BW25113_1704	aroH	3-deoxy-D-arabino-heptulosonate-7-phosphate synthase, tryptophan repressible (NCBI)	2739.22	1.22039	0.146251	8.34452	7.15026e-17	6.35295e-16	3.21047e-13	FALSE
BW25113_2253	arnB	uridine 5'-(beta-1-threo-pentapyranosyl-4-ulose diphosphate) aminotransferase, PLP-dependent (RefSeq)	2679.29	1.21643	0.132183	9.20261	3.49354e-20	3.63816e-19	1.5686e-16	FALSE
BW25113_0789	clsB	cardiolipin synthase 2 (NCBI)	122.76	1.21503	0.233611	5.20106	1.98151e-07	7.79717e-07	0.000889696	FALSE
BW25113_1554	rrrQ		26.7943	1.21365	0.663406	1.82942	0.0673361	0.105578	302.339	FALSE
BW25113_2198	ccmD	cytochrome c biogenesis protein (NCBI)	97.9205	1.21301	0.212648	5.70432	1.16806e-08	5.33733e-08	5.2446e-05	FALSE
BW25113_0384	psiF	induced by phosphate starvation (VIMSS)	191.38	1.21224	0.214626	5.64818	1.62157e-08	7.28322e-08	7.28083e-05	FALSE
BW25113_2150	mglB	methyl-galactoside transporter subunit (NCBI)	34730.2	1.21169	0.674301	1.79696	0.0723426	0.112366	324.818	FALSE
BW25113_2976	glcB	malate synthase (NCBI)	1748.87	1.20818	0.111339	10.8513	1.96534e-27	3.00368e-26	8.82436e-24	FALSE
BW25113_1112	bhsA		232.449	1.20371	0.245024	4.9126	8.98748e-07	3.22484e-06	0.00403538	FALSE
BW25113_1930	yedF	hypothetical protein (NCBI)	2110.71	1.20084	0.228805	5.24829	1.5352e-07	6.14354e-07	0.000689304	FALSE
BW25113_4008	gltV		566.467	1.19982	0.300459	3.99329	6.51625e-05	0.00018306	0.29258	FALSE
BW25113_0748	lysZ		1578.4	1.19651	0.302317	3.9578	7.56448e-05	0.000209356	0.339645	FALSE
BW25113_2128	yehW	predicted transporter subunit: membrane component of ABC superfamily (NCBI)	295.55	1.1965	0.12399	9.65004	4.91359e-22	5.85188e-21	2.2062e-18	FALSE
BW25113_1661	cfa	cyclopropane fatty acyl phospholipid synthase (unsaturated-phospholipid methyltransferase) (NCBI)	3040.74	1.19521	0.157936	7.56769	3.79907e-14	2.78889e-13	1.70578e-10	FALSE
BW25113_3425	glpE	thiosulfate sulfurtransferase (NCBI)	1700.56	1.18987	0.113998	10.4376	1.66971e-25	2.30771e-24	7.497e-22	FALSE
BW25113_0976	hyaE	protein involved in processing of HyaA and HyaB proteins (NCBI)	30.8745	1.18779	0.330832	3.5903	0.000330303	0.000821721	1.48306	FALSE
BW25113_1003	yccJ		586.645	1.18693	0.323429	3.66984	0.000242699	0.000618207	1.08972	FALSE
BW25113_1506	yneL		11.1223	1.18605	0.510326	2.32411	0.0201198	0.0358807	90.3379	FALSE
BW25113_1609	rstB	sensory histidine kinase in two-component regulatory system with RstA (NCBI)	5051.05	1.18101	0.0792348	14.9051	3.05201e-50	1.13891e-48	1.37035e-46	FALSE
BW25113_2753	iap	aminopeptidase in alkaline phosphatase isozyme conversion (NCBI)	1291.65	1.1746	0.0962238	12.2069	2.85454e-34	6.35952e-33	1.28169e-30	FALSE
BW25113_1990	ldtA	conserved protein with NAD(P)-binding Rossmann-fold domain (NCBI)	1021.12	1.17123	0.13268	8.82745	1.0709e-18	1.0425e-17	4.80833e-15	FALSE
BW25113_2424	cysU	sulfate/thiosulfate transporter subunit (NCBI)	173.94	1.16951	0.468509	2.49625	0.0125515	0.0234876	56.3564	FALSE
BW25113_1010	rutC	hypothetical protein (NCBI)	21.4098	1.16876	0.659625	1.77185	0.0764193	0.117918	343.122	FALSE
BW25113_1460	ydcC		56.6233	1.16862	0.289784	4.03271	5.51382e-05	0.000156569	0.247571	FALSE
BW25113_4369	leuP	tRNA-Leu (NCBI)	1386.28	1.16538	0.293717	3.96769	7.25714e-05	0.000201722	0.325846	FALSE
BW25113_1270	btuR	cob(I)yrinic acid a,c-diamide adenosyltransferase (NCBI)	1990.61	1.16401	0.103471	11.2496	2.3253e-29	3.98954e-28	1.04406e-25	FALSE
BW25113_1057	yceJ	predicted cytochrome b561 (NCBI)	203.079	1.16209	0.219108	5.3037	1.13477e-07	4.61101e-07	0.000509513	FALSE
BW25113_3102	yqjG	predicted S-transferase (NCBI)	674.581	1.15963	0.116299	9.9711	2.03951e-23	2.60197e-22	9.1574e-20	FALSE
BW25113_1056	yceI	hypothetical protein (NCBI)	1127.24	1.15874	0.097755	11.8535	2.06405e-32	4.12626e-31	9.2676e-29	FALSE
BW25113_1807	tsaB		4641.11	1.15743	0.153508	7.53982	4.70603e-14	3.40997e-13	2.11301e-10	FALSE
BW25113_1600	mdtJ		340.833	1.15579	0.274927	4.20397	2.62268e-05	7.80357e-05	0.117758	FALSE
BW25113_1513	lsrA	fused AI2 transporter subunits of ABC superfamily: ATP-binding components (NCBI)	131.866	1.15454	0.222354	5.19234	2.07662e-07	8.14996e-07	0.000932403	FALSE
BW25113_2519	pbpC	fused transglycosylase/transpeptidase (NCBI)	1094.96	1.15358	0.0972395	11.8633	1.83557e-32	3.70256e-31	8.24171e-29	FALSE
BW25113_1700	ydiT		17.2721	1.15318	0.49049	2.35107	0.0187194	0.0335974	84.0501	FALSE
BW25113_4686	yshB	expressed protein (RefSeq)	672.919	1.14928	0.0986653	11.6483	2.34103e-31	4.46091e-30	1.05112e-27	FALSE
BW25113_3830	ysgA	predicted hydrolase (NCBI)	917.212	1.13346	0.167395	6.77117	1.27748e-11	7.7514e-11	5.73587e-08	FALSE
BW25113_2518	ndk	nucleoside diphosphate kinase (NCBI)	12112.4	1.13247	0.287282	3.942	8.08058e-05	0.000222402	0.362818	FALSE
BW25113_0673	metT		6923.81	1.13129	0.308359	3.66875	0.000243744	0.000620514	1.09441	FALSE
BW25113_1835	rsmF	putative nucleolar proteins (VIMSS)	2229.11	1.12913	0.195685	5.77015	7.92016e-09	3.68675e-08	3.55615e-05	FALSE
BW25113_2981	yghO	predicted DNA-binding transcriptional regulator (RefSeq)	192.788	1.12848	0.254779	4.42926	9.45575e-06	2.96519e-05	0.0424563	FALSE
BW25113_2590	gltW		3873.12	1.12841	0.307008	3.67551	0.000237374	0.000605331	1.06581	FALSE
BW25113_0856	potH	putrescine transporter subunit: membrane component of ABC superfamily (NCBI)	121.596	1.12796	0.218647	5.1588	2.48544e-07	9.64454e-07	0.00111596	FALSE
BW25113_1483	ddpF	D-ala-D-ala transporter subunit (NCBI)	175.337	1.12419	0.21404	5.25227	1.50233e-07	6.02275e-07	0.000674544	FALSE
BW25113_0348	mhpB	2,3-dihydroxyphenylpropionate 1,2-dioxygenase (NCBI)	49.6208	1.123	0.336406	3.33824	0.000843103	0.00196636	3.78553	FALSE
BW25113_0736	ybgC	predicted acyl-CoA thioesterase (NCBI)	2943.3	1.12149	0.204914	5.47298	4.42528e-08	1.88548e-07	0.000198695	FALSE
BW25113_2670	alaE	predicted inner membrane protein (NCBI)	714.503	1.1201	0.168796	6.63585	3.2263e-11	1.90598e-10	1.44861e-07	FALSE
BW25113_1907	tyrP	tyrosine transporter (NCBI)	1893.87	1.11858	0.17673	6.32931	2.46268e-10	1.31597e-09	1.10574e-06	FALSE
BW25113_2135	yohC	orf, hypothetical protein (VIMSS)	73.7069	1.11839	0.22016	5.07991	3.77614e-07	1.42817e-06	0.00169549	FALSE
BW25113_1465	narV	nitrate reductase 2 (NRZ), gamma subunit (NCBI)	65.6929	1.11678	0.303209	3.68321	0.000230313	0.000589001	1.0341	FALSE
BW25113_3853	alaT		355.043	1.11609	0.307133	3.63389	0.000279181	0.000703927	1.25352	FALSE
BW25113_2814	metZ	tRNA-Met (NCBI)	2109.44	1.11497	0.358933	3.10634	0.00189421	0.00415188	8.50501	FALSE
BW25113_2080	yegP	orf, hypothetical protein (VIMSS)	68.6468	1.11303	0.217889	5.10823	3.25195e-07	1.23723e-06	0.00146013	FALSE
BW25113_0627	tatE	twin arginine translocase protein E (NCBI)	1467.01	1.11278	0.081968	13.5758	5.5756e-42	1.67567e-40	2.50344e-38	FALSE
BW25113_1931	yedK	hypothetical protein (NCBI)	134.835	1.11211	0.276256	4.02564	5.68209e-05	0.000161124	0.255126	FALSE
BW25113_0790	ybhP	predicted DNase (NCBI)	102.521	1.1108	0.235538	4.71601	2.40509e-06	8.16526e-06	0.0107988	FALSE
BW25113_2972	pppA	putative peptidase (VIMSS)	246.12	1.108	0.207165	5.34842	8.87261e-08	3.66189e-07	0.00039838	FALSE
BW25113_0296	ykgM	50S ribosomal protein L31 (NCBI)	227.478	1.10693	0.129285	8.56194	1.10984e-17	1.03539e-16	4.98318e-14	FALSE
BW25113_2701	mltB	membrane-bound lytic murein transglycosylase B (NCBI)	1480.92	1.10688	0.117109	9.45167	3.33453e-21	3.71444e-20	1.49721e-17	FALSE
BW25113_3471	yhhQ	conserved inner membrane protein (NCBI)	590.273	1.10555	0.212939	5.19189	2.08171e-07	8.16277e-07	0.000934686	FALSE
BW25113_2112	yehE	hypothetical protein (NCBI)	155.875	1.10352	0.202642	5.44567	5.16101e-08	2.18234e-07	0.000231729	FALSE
BW25113_0550	rusA	DLP12 prophage; endonuclease RUS (NCBI)	13.4224	1.09823	0.543159	2.02193	0.0431837	0.0711204	193.895	FALSE
BW25113_1959	yedA	predicted inner membrane protein (NCBI)	759.572	1.09426	0.101643	10.7657	4.99602e-27	7.50745e-26	2.24321e-23	FALSE
BW25113_1398	paaK		566.75	1.0899	0.33423	3.26094	0.00111045	0.00252288	4.98592	FALSE
BW25113_3276	alaU		431.473	1.08736	0.324898	3.34678	0.000817549	0.00191274	3.6708	FALSE
BW25113_1283	osmB	lipoprotein (NCBI)	2175.61	1.08147	0.133083	8.12626	4.42741e-16	3.67147e-15	1.98791e-12	FALSE
BW25113_0234	yafP		159.982	1.08146	0.279566	3.86836	0.000109571	0.000296831	0.491976	FALSE
BW25113_2340	sixA	phosphohistidine phosphatase (NCBI)	3336.98	1.07997	0.200673	5.38172	7.37772e-08	3.07039e-07	0.00033126	FALSE
BW25113_1812	pabB	para-aminobenzoate synthase component I (NCBI)	1610.3	1.07734	0.187017	5.76067	8.37783e-09	3.89574e-08	3.76165e-05	FALSE
BW25113_1502	ydeQ	predicted fimbrial-like adhesin protein (NCBI)	33.5601	1.07713	0.687316	1.56715	0.11708	0.171671	525.689	FALSE
BW25113_2093	gatB	galactitol-specific enzyme IIB component of PTS (NCBI)	24867.9	1.07578	0.197357	5.45096	5.00978e-08	2.1224e-07	0.000224939	FALSE
BW25113_1285	gmr	modulator of Rnase II stability (NCBI)	2560.73	1.07449	0.137304	7.82564	5.05078e-15	3.94031e-14	2.2678e-11	FALSE
BW25113_3450	ugpC	ATP-binding component of sn-glycerol 3-phosphate transport system (VIMSS)	666.774	1.07287	0.156129	6.87168	6.3451e-12	3.99064e-11	2.84895e-08	FALSE
BW25113_4467	glcF	glycolate oxidase iron-sulfur subunit (NCBI)	345.494	1.07222	0.127136	8.43367	3.34987e-17	3.03659e-16	1.50409e-13	FALSE
BW25113_0883	serW		67.7914	1.07174	0.460756	2.32604	0.0200162	0.0357245	89.8728	FALSE
BW25113_2693	argY		3765.77	1.07095	0.295365	3.62585	0.00028801	0.000723743	1.29317	FALSE
BW25113_1678	ldtE	hypothetical protein (NCBI)	956.411	1.07004	0.0965031	11.0881	1.43266e-28	2.33289e-27	6.43263e-25	FALSE
BW25113_3852	ileT		624.5	1.06987	0.31632	3.38223	0.000718996	0.00169545	3.22829	FALSE
BW25113_1365	ynaK	Rac prophage; conserved protein (NCBI)	32.4071	1.06918	0.382386	2.79609	0.00517255	0.0104572	23.2248	FALSE
BW25113_1489	dosP	putative enzyme (VIMSS)	391.287	1.06808	0.115459	9.25076	2.22908e-20	2.33767e-19	1.00086e-16	FALSE
BW25113_1320	ycjW	predicted DNA-binding transcriptional regulator (NCBI)	715.107	1.06428	0.106278	10.0141	1.32188e-23	1.70097e-22	5.93522e-20	FALSE
BW25113_3088	alx	predicted inner membrane protein, part of terminus (NCBI)	988.305	1.064	0.153343	6.9387	3.95715e-12	2.52064e-11	1.77676e-08	FALSE
BW25113_0745	lysW		4856	1.06201	0.288141	3.68573	0.000228048	0.000583875	1.02393	FALSE
BW25113_1828	yebQ	putative transport protein (VIMSS)	531.661	1.06123	0.157403	6.74215	1.56062e-11	9.39307e-11	7.00717e-08	FALSE
BW25113_1516	lsrB	AI2 transporter (NCBI)	117.843	1.06078	0.261827	4.05146	5.08998e-05	0.000145549	0.22854	FALSE
BW25113_1961	dcm	DNA cytosine methylase (NCBI)	4181.8	1.05866	0.0576537	18.3624	2.62533e-75	1.67946e-73	1.17877e-71	FALSE
BW25113_0216	aspV	tRNA-Asp (NCBI)	85.7767	1.05292	0.358105	2.94026	0.00327941	0.00686546	14.7246	FALSE
BW25113_4672	ymiB		20.2939	1.04899	0.557116	1.88289	0.0597148	0.0952629	268.12	FALSE
BW25113_1258	yciF		41.8466	1.04804	0.269778	3.88482	0.000102407	0.000278601	0.459806	FALSE
BW25113_1493	gadB		151.705	1.04534	0.229162	4.56158	5.07711e-06	1.65589e-05	0.0227962	FALSE
BW25113_1859	znuB	high-affinity zinc transporter membrane component (NCBI)	1336.72	1.04495	0.0859714	12.1546	5.42372e-34	1.179e-32	2.43525e-30	FALSE
BW25113_2055	wcaE		257.418	1.04481	0.291078	3.58946	0.000331369	0.000823914	1.48785	FALSE
BW25113_4528	rzoR		7.77905	1.04187	1.14965	0.906254	0.364802	0.452641	1637.96	FALSE
BW25113_0383	phoA	alkaline phosphatase (VIMSS)	808.465	1.04163	0.130367	7.98996	1.34982e-15	1.08519e-14	6.0607e-12	FALSE
BW25113_1282	yciH	orf, hypothetical protein (VIMSS)	1448.18	1.0403	0.165754	6.27615	3.47058e-10	1.81982e-09	1.55829e-06	FALSE
BW25113_4131	cadA	lysine decarboxylase 1 (NCBI)	1029.12	1.03973	0.203459	5.11028	3.21682e-07	1.22491e-06	0.00144435	FALSE
BW25113_3336	bfr	bacterioferritin, iron storage and detoxification protein (NCBI)	1184.16	1.03964	0.12411	8.37675	5.44088e-17	4.87285e-16	2.44295e-13	FALSE
BW25113_1608	rstA	DNA-binding response regulator in two-component regulatory system with RstB (RefSeq)	6431.84	1.03831	0.109597	9.47388	2.69635e-21	3.03373e-20	1.21066e-17	FALSE
BW25113_2509	xseA	exodeoxyribonuclease VII large subunit (NCBI)	4328.44	1.03692	0.180537	5.74353	9.27229e-09	4.28939e-08	4.16326e-05	FALSE
BW25113_2508	guaB		14608.5	1.03553	0.199587	5.18837	2.12139e-07	8.28971e-07	0.000952506	FALSE
BW25113_3277	ileU		805.337	1.034	0.316034	3.27181	0.00106862	0.00244146	4.79808	FALSE
BW25113_2586	yfiM	predicted protein (RefSeq)	1894.45	1.03373	0.25422	4.0663	4.7765e-05	0.000137022	0.214465	FALSE
BW25113_0698	kdpA	potassium-transporting ATPase subunit A (NCBI)	76.9672	1.03316	0.254515	4.05933	4.92134e-05	0.000141087	0.220968	FALSE
BW25113_3175	secG		31000.7	1.03289	0.225937	4.57157	4.84084e-06	1.58344e-05	0.0217354	FALSE
BW25113_2199	ccmC	heme exporter subunit (NCBI)	317.107	1.03147	0.126337	8.16437	3.23127e-16	2.69956e-15	1.45084e-12	FALSE
BW25113_2692	argZ		2675.26	1.03137	0.310621	3.32035	0.000899032	0.00208163	4.03665	FALSE
BW25113_0235	ykfJ	hypothetical protein (RefSeq)	9.44812	1.02921	0.640215	1.6076	0.107923	0.159814	484.573	FALSE
BW25113_1574	dicF		5.33519	1.02852	0.738758	1.39223	0.163853	0.230713	735.701	FALSE
BW25113_4092	phnP	carbon-phosphorus lyase complex accessory protein (NCBI)	344.707	1.02356	0.158043	6.47648	9.3885e-11	5.29493e-10	4.21544e-07	FALSE
BW25113_2741	rpoS	RNA polymerase sigma factor (NCBI)	41348.4	1.02059	0.142359	7.16907	7.55066e-13	5.13079e-12	3.39025e-09	FALSE
BW25113_0202	ileV		709.737	1.01447	0.314594	3.22469	0.00126108	0.00283843	5.66223	FALSE
BW25113_1334	fnr	DNA-binding transcriptional dual regulator, global regulator of anaerobic growth (NCBI)	19541.9	1.01443	0.152529	6.65077	2.9156e-11	1.72928e-10	1.3091e-07	FALSE
BW25113_1971	yedY	hypothetical protein (NCBI)	282.567	1.01266	0.208008	4.86838	1.12517e-06	3.98302e-06	0.00505202	FALSE
BW25113_2558	mltF	predicted periplasmic binding protein/transglycosylase (RefSeq)	1041.48	1.00947	0.206386	4.89117	1.00237e-06	3.57089e-06	0.00450064	FALSE
BW25113_1558	cspF	Qin prophage; cold shock protein (NCBI)	316.941	1.00733	0.367269	2.74277	0.00609241	0.0121306	27.3549	FALSE
BW25113_1243	oppA	oligopeptide transporter subunit (NCBI)	74324.4	1.00129	0.114344	8.75681	2.00846e-18	1.93834e-17	9.01798e-15	FALSE
BW25113_4457	csrC	regulatory RNA (NCBI)	19805.4	0.999523	0.0974337	10.2585	1.0838e-24	1.46624e-23	4.86627e-21	FALSE
BW25113_2197	ccmE	periplasmic heme chaperone (NCBI)	241.394	0.997513	0.147581	6.75908	1.38871e-11	8.39225e-11	6.23532e-08	FALSE
BW25113_0765	modC	molybdate transporter subunit (NCBI)	1906.25	0.995436	0.0808938	12.3055	8.46468e-35	1.98455e-33	3.80064e-31	FALSE
BW25113_4452	gadY	unknown RNA (NCBI)	43.8607	0.995321	0.375015	2.65408	0.00795247	0.0154831	35.7066	FALSE
BW25113_4135	yjdC	orf, hypothetical protein (VIMSS)	1765.31	0.995319	0.0810311	12.2832	1.11544e-34	2.54844e-33	5.00832e-31	FALSE
BW25113_2051	wcaH	GDP-mannose mannosyl hydrolase (VIMSS)	445.917	0.991633	0.219196	4.52396	6.0693e-06	1.95387e-05	0.0272512	FALSE
BW25113_2196	ccmF	heme lyase, CcmF subunit (NCBI)	716.648	0.990196	0.120987	8.18432	2.73846e-16	2.30504e-15	1.22957e-12	FALSE
BW25113_1518	lsrG	autoinducer-2 (AI-2) modifying protein LsrG (NCBI)	53.6073	0.990187	0.307071	3.22462	0.00126138	0.00283843	5.66362	FALSE
BW25113_1858	znuC	high-affinity zinc transporter ATPase (NCBI)	1825.41	0.989843	0.1068	9.26818	1.89357e-20	1.99515e-19	8.50212e-17	FALSE
BW25113_2397	alaW		83.5916	0.988187	0.443478	2.22827	0.0258628	0.0448889	116.124	FALSE
BW25113_1581	rspA	predicted dehydratase (NCBI)	144.376	0.986606	0.166085	5.94036	2.84396e-09	1.37977e-08	1.27694e-05	FALSE
BW25113_0908	aroA	3-phosphoshikimate 1-carboxyvinyltransferase (NCBI)	4586.49	0.98459	0.0696773	14.1307	2.4567e-45	8.27151e-44	1.10306e-41	FALSE
BW25113_0336	codB	cytosine transporter (NCBI)	682.425	0.983516	0.136399	7.21057	5.5719e-13	3.82683e-12	2.50178e-09	FALSE
BW25113_0542	renD	orf, hypothetical protein (VIMSS)	281.639	0.983459	0.255644	3.84699	0.000119578	0.000321605	0.536907	FALSE
BW25113_1281	pyrF	orotidine 5'-phosphate decarboxylase (NCBI)	3418.68	0.982257	0.168372	5.83385	5.41629e-09	2.55867e-08	2.43192e-05	FALSE
BW25113_1387	paaZ	fused aldehyde dehydrogenase/enoyl-CoA hydratase (NCBI)	126.801	0.980979	0.345235	2.84149	0.00449038	0.00914829	20.1618	FALSE
BW25113_0877	ybjX	hypothetical protein (NCBI)	15840.8	0.979486	0.103325	9.47967	2.55083e-21	2.8845e-20	1.14532e-17	FALSE
BW25113_3098	yqjD	hypothetical protein (NCBI)	3737.98	0.977568	0.080432	12.154	5.46483e-34	1.1822e-32	2.45371e-30	FALSE
BW25113_0859	rlmC	23S rRNA m(5)U747-methyltransferase (NCBI)	1804.02	0.977182	0.218027	4.48194	7.39679e-06	2.3575e-05	0.0332116	FALSE
BW25113_0203	alaV		427.383	0.976226	0.293809	3.32265	0.000891653	0.00206668	4.00352	FALSE
BW25113_4542	yohO		41.8215	0.976163	0.320619	3.04463	0.0023297	0.0050204	10.4604	FALSE
BW25113_1849	purT	phosphoribosylglycinamide formyltransferase 2 (NCBI)	392.742	0.973303	0.172872	5.6302	1.8e-08	8.0363e-08	8.08201e-05	FALSE
BW25113_2313	cvpA	membrane protein required for colicin V production (NCBI)	1723.04	0.972879	0.11001	8.84355	9.27223e-19	9.06573e-18	4.16323e-15	FALSE
BW25113_0926	ycbK	hypothetical protein (NCBI)	5515.19	0.971679	0.167895	5.78742	7.14758e-09	3.34101e-08	3.20926e-05	FALSE
BW25113_0744	valT		7178.75	0.968865	0.281243	3.44494	0.000571185	0.00136852	2.56462	FALSE
BW25113_1715	pheM		83.2027	0.966904	0.235541	4.10504	4.04244e-05	0.000117775	0.181505	FALSE
BW25113_0719	ybgD	predicted fimbrial-like adhesin protein (NCBI)	33.2892	0.966197	0.366085	2.63927	0.00830848	0.0161132	37.3051	FALSE
BW25113_1635	gstA	glutathionine S-transferase (NCBI)	1322.52	0.966153	0.13129	7.35891	1.85415e-13	1.30549e-12	8.32515e-10	FALSE
BW25113_1087	yceF	orf, hypothetical protein (VIMSS)	1343.65	0.965731	0.0704074	13.7163	8.10673e-43	2.52097e-41	3.63992e-39	FALSE
BW25113_2498	upp	uracil phosphoribosyltransferase (VIMSS)	11854.8	0.963	0.14455	6.66208	2.69981e-11	1.60554e-10	1.21221e-07	FALSE
BW25113_2081	yegQ	predicted peptidase (NCBI)	6337.41	0.962938	0.232081	4.14914	3.33725e-05	9.81234e-05	0.149842	FALSE
BW25113_2295	yfbV	hypothetical protein (NCBI)	1040.51	0.96293	0.1024	9.40366	5.26966e-21	5.7415e-20	2.36608e-17	FALSE
BW25113_2809	ygdI	orf, hypothetical protein (VIMSS)	489.914	0.962072	0.139179	6.91249	4.76228e-12	3.02061e-11	2.13826e-08	FALSE
BW25113_0496	ybbP	predicted inner membrane protein (NCBI)	1101.29	0.961923	0.116157	8.28123	1.21912e-16	1.06004e-15	5.47384e-13	FALSE
BW25113_4632	ylbI		7.49546	0.961884	0.668139	1.43965	0.149967	0.212786	673.353	FALSE
BW25113_3099	yqjE	conserved inner membrane protein (NCBI)	3523.11	0.961258	0.0811758	11.8417	2.37635e-32	4.72946e-31	1.06698e-28	FALSE
BW25113_1666	valW		168.473	0.958451	0.340337	2.81618	0.00485984	0.00985168	21.8207	FALSE
BW25113_1695	ydiO	putative oxidoreductase (VIMSS)	117.581	0.957094	0.212358	4.50697	6.57584e-06	2.10785e-05	0.0295255	FALSE
BW25113_1847	yebF	predicted protein (RefSeq)	1740.62	0.956867	0.0946165	10.1131	4.83229e-24	6.29041e-23	2.1697e-20	FALSE
BW25113_3969	gltT		4069.71	0.955844	0.309782	3.08554	0.00203184	0.00442323	9.12298	FALSE
BW25113_1034	ycdX	hypothetical protein (NCBI)	3447.63	0.955246	0.0705768	13.5348	9.73868e-42	2.88807e-40	4.37267e-38	FALSE
BW25113_2971	yghG	hypothetical protein (NCBI)	77.455	0.95424	0.257193	3.7102	0.000207095	0.000534507	0.929855	FALSE
BW25113_2587	kgtP	alpha-ketoglutarate transporter (NCBI)	41972	0.95365	0.195188	4.8858	1.03012e-06	3.66103e-06	0.00462525	FALSE
BW25113_0743	lysT		11647.9	0.953542	0.285408	3.34097	0.000834856	0.00194916	3.74851	FALSE
BW25113_1693	aroD	3-dehydroquinate dehydratase (NCBI)	995.983	0.952408	0.157268	6.05597	1.39575e-09	6.95234e-09	6.2669e-06	FALSE
BW25113_4552	yrhC		26.5873	0.95187	0.343742	2.76914	0.0056205	0.0112611	25.236	FALSE
BW25113_1626	ydgK	orf, hypothetical protein (VIMSS)	1062.85	0.943224	0.183672	5.13536	2.81606e-07	1.08336e-06	0.00126441	FALSE
BW25113_3236	mdh	malate dehydrogenase (NCBI)	34125.4	0.943169	0.192732	4.89369	9.89632e-07	3.52832e-06	0.00444345	FALSE
BW25113_3616	tdh	L-threonine 3-dehydrogenase (NCBI)	31920.6	0.94221	0.0867837	10.857	1.84743e-27	2.83314e-26	8.29495e-24	FALSE
BW25113_0708	phr	deoxyribodipyrimidine photolyase, FAD-binding (NCBI)	935.068	0.940877	0.0949298	9.91129	3.71807e-23	4.62487e-22	1.66941e-19	FALSE
BW25113_1271	yciK	short chain dehydrogenase (NCBI)	2342.81	0.939518	0.128902	7.28861	3.13158e-13	2.18771e-12	1.40608e-09	FALSE
BW25113_4702	mgtL	regulatory leader peptide for mgtA (NCBI)	588.401	0.938021	0.147698	6.35094	2.13998e-10	1.15735e-09	9.6085e-07	FALSE
BW25113_2477	bamC	lipoprotein-34 (VIMSS)	20896.5	0.936791	0.0874703	10.7098	9.15354e-27	1.34392e-25	4.10994e-23	FALSE
BW25113_1421	trg	methyl-accepting chemotaxis protein III, ribose and galactose sensor receptor (NCBI)	497.142	0.936531	0.281025	3.33255	0.000860528	0.00199971	3.86377	FALSE
BW25113_3361	fic	stationary-phase protein, cell division (NCBI)	349.401	0.936393	0.211329	4.43096	9.38124e-06	2.94388e-05	0.0421218	FALSE
BW25113_1439	ydcR	fused predicted DNA-binding transcriptional regulator/predicted amino transferase (NCBI)	1482.3	0.934107	0.231176	4.04068	5.32961e-05	0.000151723	0.239299	FALSE
BW25113_1909	leuZ		4572.11	0.933959	0.261478	3.57185	0.000354473	0.000876494	1.59158	FALSE
BW25113_4703	pmrR		201.517	0.931404	0.202567	4.59801	4.26552e-06	1.40552e-05	0.0191522	FALSE
BW25113_2533	suhB		9938.15	0.931217	0.302724	3.07612	0.00209712	0.00455427	9.41607	FALSE
BW25113_2094	gatA	galactitol-specific enzyme IIA component of PTS (NCBI)	54129.1	0.931121	0.192385	4.83988	1.29917e-06	4.57726e-06	0.00583329	FALSE
BW25113_1694	ydiF	fused predicted acetyl-CoA:acetoacetyl-CoA transferase: alpha subunit/beta subunit (NCBI)	125.403	0.926446	0.304047	3.04705	0.00231102	0.00498255	10.3765	FALSE
BW25113_3174	leuU		1793.26	0.925953	0.220278	4.20357	2.62739e-05	7.81239e-05	0.11797	FALSE
BW25113_0694	kdpE	DNA-binding response regulator in two-component regulatory system with KdpD (NCBI)	443.319	0.924883	0.16298	5.67481	1.38843e-08	6.30568e-08	6.23406e-05	FALSE
BW25113_4232	fbp	fructose-1,6-bisphosphatase (NCBI)	14065.2	0.924097	0.140477	6.57827	4.75954e-11	2.74655e-10	2.13703e-07	FALSE
BW25113_2056	wcaD	predicted colanic acid polymerase (NCBI)	295.364	0.921567	0.284915	3.23454	0.00121839	0.00275137	5.47058	FALSE
BW25113_3100	yqjK	hypothetical protein (NCBI)	1730.53	0.918756	0.0803593	11.4331	2.85701e-30	5.15874e-29	1.2828e-26	FALSE
BW25113_1021	pgaD	predicted inner membrane protein (NCBI)	115.959	0.918254	0.198067	4.63607	3.55102e-06	1.17701e-05	0.0159441	FALSE
BW25113_1707	ydiV	hypothetical protein (NCBI)	380.336	0.917631	0.20644	4.44503	8.78791e-06	2.76934e-05	0.0394577	FALSE
BW25113_3570	bax	hypothetical protein (NCBI)	7882.74	0.917268	0.159959	5.73439	9.78655e-09	4.52262e-08	4.39416e-05	FALSE
BW25113_0393	rdgC	recombination associated protein (NCBI)	7145.45	0.916802	0.105848	8.6615	4.656e-18	4.42666e-17	2.09054e-14	FALSE
BW25113_3396	mrcA	peptidoglycan synthetase; penicillin-binding protein 1A (VIMSS)	6038.24	0.916123	0.118508	7.73045	1.07164e-14	8.18909e-14	4.81167e-11	FALSE
BW25113_2832	ygdQ	predicted inner membrane protein (NCBI)	1559.75	0.913006	0.170378	5.3587	8.38247e-08	3.46599e-07	0.000376373	FALSE
BW25113_1009	rutD	predicted hydrolase (NCBI)	22.5073	0.911657	0.357493	2.55014	0.010768	0.0204059	48.3483	FALSE
BW25113_0118	acnB		95882.7	0.910059	0.166501	5.4658	4.6082e-08	1.95783e-07	0.000206908	FALSE
BW25113_2642	yfjW		293.653	0.906197	0.207909	4.35862	1.30883e-05	4.04202e-05	0.0587664	FALSE
BW25113_0857	potI	putrescine transporter subunit: membrane component of ABC superfamily (NCBI)	133.838	0.905477	0.197461	4.5856	4.52676e-06	1.48504e-05	0.0203251	FALSE
BW25113_2703	srlE	glucitol/sorbitol-specific enzyme IIB component of PTS (NCBI)	7346.91	0.905362	0.235109	3.85082	0.000117722	0.000317183	0.52857	FALSE
BW25113_1466	narW	nitrate reductase 2 (NRZ), delta subunit (assembly subunit) (NCBI)	8.33293	0.905336	0.560724	1.61458	0.106401	0.158241	477.739	FALSE
BW25113_3727	pstC	phosphate transporter subunit (NCBI)	1630.48	0.904861	0.143457	6.30756	2.83462e-10	1.50753e-09	1.27275e-06	FALSE
BW25113_1286	rnb	exoribonuclease II (NCBI)	25582.6	0.902384	0.140944	6.40243	1.52923e-10	8.423e-10	6.86625e-07	FALSE
BW25113_1580	rspB	predicted oxidoreductase, Zn-dependent and NAD(P)-binding (NCBI)	101.524	0.902249	0.194658	4.63505	3.56843e-06	1.18191e-05	0.0160223	FALSE
BW25113_4050	pspG	orf, hypothetical protein (VIMSS)	123.033	0.901105	0.18652	4.83113	1.35758e-06	4.77551e-06	0.00609552	FALSE
BW25113_0737	tolQ	membrane spanning protein in TolA-TolQ-TolR complex (NCBI)	5490.96	0.898612	0.183369	4.90057	9.55566e-07	3.40958e-06	0.00429049	FALSE
BW25113_1492	gadC	predicted glutamate:gamma-aminobutyric acid antiporter (NCBI)	175.089	0.898558	0.14795	6.0734	1.25233e-09	6.25887e-09	5.62297e-06	FALSE
BW25113_4227	ytfQ	predicted sugar transporter subunit: periplasmic-binding component of ABC superfamily (NCBI)	720.222	0.897966	0.242724	3.69954	0.000215989	0.000555222	0.969789	FALSE
BW25113_0068	thiB	thiamin transporter subunit (NCBI)	1503.08	0.897326	0.174771	5.1343	2.83198e-07	1.08855e-06	0.00127156	FALSE
BW25113_4210	ytfF	predicted inner membrane protein (RefSeq)	475.405	0.896166	0.156641	5.72113	1.0582e-08	4.87013e-08	4.75134e-05	FALSE
BW25113_2054	wcaF	predicted acyl transferase (NCBI)	287.184	0.89368	0.271665	3.28964	0.00100315	0.00230128	4.50413	FALSE
BW25113_0980	appA	phosphoanhydride phosphorylase (NCBI)	290.603	0.890368	0.166284	5.3545	8.57952e-08	3.5442e-07	0.000385221	FALSE
BW25113_3257	yhdT	conserved inner membrane protein (NCBI)	385.979	0.890036	0.202063	4.40475	1.05906e-05	3.30946e-05	0.0475517	FALSE
BW25113_0788	ybhN	conserved inner membrane protein (NCBI)	82.6729	0.888784	0.300111	2.96151	0.00306132	0.00645033	13.7453	FALSE
BW25113_0945	pyrD	dihydroorotate dehydrogenase (NCBI)	2208.38	0.888493	0.147221	6.03508	1.58881e-09	7.87897e-09	7.13378e-06	FALSE
BW25113_1194	ycgR	protein involved in flagellar function (NCBI)	198.584	0.887677	0.255453	3.47491	0.000511029	0.00123496	2.29452	FALSE
BW25113_1565	ydfV	Qin prophage; predicted protein (NCBI)	102.808	0.885672	0.270943	3.26885	0.00107987	0.00246214	4.84861	FALSE
BW25113_4603	rseX		2.42922	0.883689	1.20754	0.73181	0.464285	0.551477	2084.64	FALSE
BW25113_2694	argV		7553.68	0.880997	0.26982	3.26513	0.00109414	0.00248843	4.91271	FALSE
BW25113_1295	ymjA	hypothetical protein (NCBI)	651.661	0.880232	0.168016	5.239	1.61453e-07	6.45525e-07	0.000724926	FALSE
BW25113_1786	yeaJ	orf, hypothetical protein (VIMSS)	1257.5	0.87793	0.143604	6.11353	9.7452e-10	4.9143e-09	4.3756e-06	FALSE
BW25113_1957	yodC	hypothetical protein (NCBI)	665.191	0.877361	0.0939398	9.33961	9.66861e-21	1.04077e-19	4.34121e-17	FALSE
BW25113_2552	hmp	fused nitric oxide dioxygenase/dihydropteridine reductase 2 (NCBI)	1228.18	0.87715	0.104631	8.38328	5.14745e-17	4.62857e-16	2.31121e-13	FALSE
BW25113_0666	metU		5268.02	0.876347	0.262538	3.33799	0.000843876	0.00196714	3.789	FALSE
BW25113_0920	ycbC	conserved inner membrane protein (NCBI)	638.002	0.876103	0.1132	7.73944	9.98533e-15	7.65656e-14	4.48341e-11	FALSE
BW25113_2452	eutH	predicted inner membrane protein (NCBI)	83.9059	0.876064	0.22063	3.97074	7.16496e-05	0.000199532	0.321706	FALSE
BW25113_0273	argF	CP4-6 prophage; ornithine carbamoyltransferase 2, chain F (NCBI)	521.728	0.875323	0.136056	6.43356	1.24646e-10	6.95101e-10	5.59662e-07	FALSE
BW25113_4678	yoeI		813.575	0.874115	0.270427	3.23235	0.00122776	0.00276972	5.51263	FALSE
BW25113_1623	add	adenosine deaminase (NCBI)	6103.68	0.867554	0.186459	4.65278	3.27491e-06	1.08872e-05	0.0147043	FALSE
BW25113_1366	ydaY	Rac prophage; predicted protein (RefSeq)	52.5646	0.867138	0.525001	1.65169	0.0985979	0.147617	442.704	FALSE
BW25113_2049	cpsB	mannose-1-phosphate guanyltransferase (NCBI)	725.707	0.866022	0.152746	5.66969	1.43057e-08	6.48391e-08	6.42327e-05	FALSE
BW25113_0195	tsaA	hypothetical protein (NCBI)	2316.22	0.86311	0.142794	6.04445	1.49918e-09	7.45927e-09	6.73133e-06	FALSE
BW25113_1649	nemR		522.922	0.861366	0.150761	5.71344	1.10713e-08	5.07962e-08	4.971e-05	FALSE
BW25113_0286	paoA	predicted xanthine dehydrogenase, 2Fe-2S subunit (NCBI)	60.4399	0.858052	0.294736	2.91126	0.00359979	0.0074802	16.163	FALSE
BW25113_1381	ydbH	hypothetical protein (NCBI)	2715.93	0.854843	0.0739407	11.5612	6.47949e-31	1.20896e-29	2.90929e-27	FALSE
BW25113_0065	yabI	conserved inner membrane protein (NCBI)	1439.96	0.85471	0.171977	4.96992	6.69797e-07	2.45849e-06	0.00300739	FALSE
BW25113_0399	phoB	DNA-binding response regulator in two-component regulatory system with PhoR (or CreC) (NCBI)	1099.38	0.853757	0.122475	6.97089	3.14945e-12	2.02052e-11	1.4141e-08	FALSE
BW25113_4361	dnaC		1230.05	0.853313	0.134622	6.3386	2.31862e-10	1.24494e-09	1.04106e-06	FALSE
BW25113_4245	pyrB	aspartate carbamoyltransferase catalytic subunit (NCBI)	293.104	0.853211	0.176567	4.83222	1.3502e-06	4.75331e-06	0.00606241	FALSE
BW25113_2140	dusC	tRNA-dihydrouridine synthase C (NCBI)	1185.72	0.849773	0.169311	5.019	5.19423e-07	1.93348e-06	0.00233221	FALSE
BW25113_4431	rprA	Positive regulatory sRNA for RpoS translation; non-essential gene (RefSeq)	12.653	0.849204	0.430657	1.97188	0.0486234	0.0791807	218.319	FALSE
BW25113_1806	yeaY	predicted lipoprotein (NCBI)	4162.37	0.848794	0.131564	6.45158	1.10689e-10	6.19582e-10	4.96994e-07	FALSE
BW25113_4270	leuX		92.4506	0.84797	0.409959	2.06843	0.0386	0.0644229	173.314	FALSE
BW25113_3995	rsd	stationary phase protein, binds sigma 70 RNA polymerase subunit (NCBI)	3001.57	0.846205	0.189018	4.47684	7.57549e-06	2.4076e-05	0.034014	FALSE
BW25113_1960	vsr	DNA mismatch endonuclease of very short patch repair (NCBI)	677.646	0.846098	0.0825892	10.2447	1.25069e-24	1.68186e-23	5.61562e-21	FALSE
BW25113_0632	dacA	D-alanyl-D-alanine carboxypeptidase (penicillin-binding protein 5) (NCBI)	11437.7	0.840526	0.128658	6.53305	6.44452e-11	3.66225e-10	2.89359e-07	FALSE
BW25113_4362	dnaT		782.43	0.840123	0.140878	5.96346	2.46953e-09	1.20726e-08	1.10882e-05	FALSE
BW25113_0868	ybjS	putative nucleotide di-P-sugar epimerase or dehydratase (VIMSS)	2256.65	0.840003	0.129849	6.46907	9.86081e-11	5.54036e-10	4.4275e-07	FALSE
BW25113_2299	yfcD	predicted NUDIX hydrolase (NCBI)	3477.07	0.83985	0.0646593	12.9889	1.41535e-38	3.84118e-37	6.35494e-35	FALSE
BW25113_1615	uidC	membrane-associated protein (VIMSS)	73.5586	0.837016	0.374657	2.23409	0.0254773	0.0442714	114.393	FALSE
BW25113_2028	ugd	UDP-glucose 6-dehydrogenase (NCBI)	1953.89	0.836313	0.1777	4.70633	2.52221e-06	8.537e-06	0.0113247	FALSE
BW25113_1868	yecE	hypothetical protein (NCBI)	816.877	0.835679	0.1259	6.63766	3.18696e-11	1.88772e-10	1.43094e-07	FALSE
BW25113_4064	yjcD	predicted permease (NCBI)	1204.35	0.833912	0.147561	5.65129	1.5925e-08	7.17838e-08	7.15031e-05	FALSE
BW25113_1204	pth		2992.91	0.833243	0.136265	6.11486	9.66403e-10	4.87887e-09	4.33915e-06	FALSE
BW25113_1144	ymfJ	orf, hypothetical protein (VIMSS)	160.556	0.833226	0.24125	3.45379	0.000552774	0.00132725	2.48195	FALSE
BW25113_1069	murJ		2700.48	0.833079	0.185492	4.49119	7.08272e-06	2.259e-05	0.0318014	FALSE
BW25113_2062	wza	lipoprotein required for capsular polysaccharide translocation through the outer membrane (NCBI)	370.009	0.828742	0.279348	2.9667	0.00301015	0.00636423	13.5156	FALSE
BW25113_0685	ybfE	orf, hypothetical protein (VIMSS)	1091.26	0.82859	0.269933	3.06962	0.00214334	0.00464788	9.62359	FALSE
BW25113_4030	psiE	phosphate-starvation-inducible protein PsiE (NCBI)	66.0122	0.828022	0.295251	2.80447	0.00503995	0.0101937	22.6294	FALSE
BW25113_3424	glpG	predicted intramembrane serine protease (NCBI)	4122.27	0.827961	0.131848	6.27966	3.39325e-10	1.78345e-09	1.52357e-06	FALSE
BW25113_0684	fldA		8818.03	0.826602	0.105837	7.81014	5.71262e-15	4.4258e-14	2.56497e-11	FALSE
BW25113_4029	yjbH	predicted porin (NCBI)	452.793	0.826476	0.138867	5.95157	2.65585e-09	1.29271e-08	1.19248e-05	FALSE
BW25113_4372	holD		1434.74	0.82345	0.153008	5.38174	7.37712e-08	3.07039e-07	0.000331233	FALSE
BW25113_2520	yfhM	hypothetical protein (NCBI)	12296.1	0.823407	0.0926581	8.88651	6.3058e-19	6.21969e-18	2.8313e-15	FALSE
BW25113_2815	metW		4610.17	0.823265	0.320037	2.57241	0.0100994	0.0192125	45.3464	FALSE
BW25113_1599	mdtI		254.278	0.820202	0.224397	3.65514	0.000257039	0.000652137	1.15411	FALSE
BW25113_1815	yoaD	orf, hypothetical protein (VIMSS)	255.872	0.819735	0.132125	6.20425	5.49583e-10	2.84512e-09	2.46763e-06	FALSE
BW25113_0220	ivy	inhibitor of vertebrate C-lysozyme (NCBI)	8568.07	0.819488	0.103004	7.95588	1.77856e-15	1.41715e-14	7.98572e-12	FALSE
BW25113_1754	ynjB	orf, hypothetical protein (VIMSS)	508.608	0.81871	0.123839	6.61108	3.81514e-11	2.22161e-10	1.713e-07	FALSE
BW25113_1665	valV		167.111	0.818406	0.381267	2.14654	0.0318297	0.0541129	142.915	FALSE
BW25113_2480	bcp	thioredoxin-dependent thiol peroxidase (NCBI)	11939.4	0.81746	0.0716419	11.4104	3.71128e-30	6.64765e-29	1.66637e-26	FALSE
BW25113_1133	mnmA		11163.7	0.817153	0.161445	5.06148	4.16008e-07	1.56677e-06	0.00186788	FALSE
BW25113_4026	yjbE	hypothetical protein (NCBI)	2449.23	0.817125	0.171859	4.75464	1.98805e-06	6.83756e-06	0.00892636	FALSE
BW25113_1244	oppB	oligopeptide permease ABC transporter membrane protein (NCBI)	14769.9	0.817089	0.106682	7.65913	1.87193e-14	1.4112e-13	8.40498e-11	FALSE
BW25113_4498	gatR		2430.12	0.817004	0.19375	4.2168	2.47792e-05	7.39743e-05	0.111259	FALSE
BW25113_0907	serC	phosphoserine aminotransferase (NCBI)	10425.6	0.816077	0.144443	5.64983	1.6061e-08	7.221e-08	7.21139e-05	FALSE
BW25113_0285	paoB	predicted oxidoreductase with FAD-binding domain (NCBI)	76.6868	0.81607	0.247463	3.29774	0.000974653	0.00223935	4.37619	FALSE
BW25113_3279	yrdA	putative transferase (VIMSS)	3872.87	0.81444	0.140297	5.80509	6.43299e-09	3.01959e-08	2.88841e-05	FALSE
BW25113_3360	pabA	para-aminobenzoate synthase component II (NCBI)	386.711	0.813962	0.148131	5.49488	3.90968e-08	1.67858e-07	0.000175545	FALSE
BW25113_1566	flxA	Qin prophage; predicted protein (NCBI)	46.6766	0.811369	0.307583	2.63789	0.00834245	0.0161721	37.4576	FALSE
BW25113_1956	yedQ	orf, hypothetical protein (VIMSS)	1097.78	0.810373	0.106975	7.57537	3.58117e-14	2.64192e-13	1.60794e-10	FALSE
BW25113_0841	ybjG	undecaprenyl pyrophosphate phosphatase (NCBI)	3010.01	0.810109	0.147513	5.49178	3.97896e-08	1.70505e-07	0.000178655	FALSE
BW25113_2557	purL	phosphoribosylformylglycinamidine synthase (NCBI)	4721.04	0.808271	0.119422	6.76817	1.30421e-11	7.90289e-11	5.85589e-08	FALSE
BW25113_3003	yghA	oxidoreductase (NCBI)	185.302	0.807591	0.240507	3.35787	0.000785447	0.00184341	3.52666	FALSE
BW25113_3618	yibB	involved in lipopolysaccharide biosynthesis (VIMSS)	2286.55	0.805971	0.199155	4.04695	5.18903e-05	0.000148192	0.232987	FALSE
BW25113_1538	dcp	dipeptidyl carboxypeptidase II (NCBI)	3597.77	0.805841	0.0972825	8.28352	1.19592e-16	1.04189e-15	5.36967e-13	FALSE
BW25113_0702	ybfB		12.9418	0.805048	0.583439	1.37983	0.167638	0.235176	752.693	FALSE
BW25113_1035	ycdY	hypothetical protein (NCBI)	3259.54	0.80492	0.0662869	12.143	6.2508e-34	1.34572e-32	2.80661e-30	FALSE
BW25113_1524	glsB		1799.65	0.804201	0.102829	7.82075	5.25109e-15	4.08236e-14	2.35774e-11	FALSE
BW25113_4373	rimI	ribosomal-protein-alanine N-acetyltransferase (NCBI)	2062.13	0.803975	0.149721	5.36982	7.88136e-08	3.27088e-07	0.000353873	FALSE
BW25113_1015	putP	proline:sodium symporter (NCBI)	7167.85	0.802544	0.393903	2.03741	0.0416086	0.0687539	186.822	FALSE
BW25113_2422	cysA	sulfate/thiosulfate transporter subunit (NCBI)	1146.88	0.802402	0.544527	1.47358	0.140595	0.201467	631.273	FALSE
BW25113_2013	yeeE	predicted inner membrane protein (NCBI)	2739.11	0.801	0.606088	1.32159	0.186304	0.258128	836.507	FALSE
BW25113_3842	rfaH	transcriptional activator RfaH (NCBI)	1388.39	0.80067	0.232469	3.4442	0.000572759	0.00137083	2.57169	FALSE
BW25113_0838	gstB	putative transferase (VIMSS)	2635.01	0.800667	0.134283	5.96253	2.4836e-09	1.21282e-08	1.11514e-05	FALSE
BW25113_4261	lptF		7790.47	0.800312	0.109759	7.29152	3.06481e-13	2.14441e-12	1.3761e-09	FALSE
BW25113_2600	tyrA	fused chorismate mutase T/prephenate dehydrogenase (NCBI)	3981.78	0.79985	0.0720915	11.0949	1.32763e-28	2.17771e-27	5.96107e-25	FALSE
BW25113_1910	cysT		4104.58	0.79894	0.24791	3.22271	0.00126986	0.00285607	5.70168	FALSE
BW25113_4374	yjjG	nucleotidase (NCBI)	2482.5	0.798322	0.12933	6.17275	6.71133e-10	3.45441e-09	3.01339e-06	FALSE
BW25113_1987	cbl	DNA-binding transcriptional activator of cysteine biosynthesis (NCBI)	345.58	0.797738	0.207474	3.84501	0.000120548	0.00032363	0.541262	FALSE
BW25113_1158	pinE	e14 prophage; site-specific DNA recombinase (NCBI)	23.6773	0.797192	0.432479	1.84331	0.0652837	0.103046	293.124	FALSE
BW25113_0275	insA		230.176	0.797035	0.162103	4.91683	8.79582e-07	3.15859e-06	0.00394932	FALSE
BW25113_2570	rseC	RseC protein involved in reduction of the SoxR iron-sulfur cluster (NCBI)	2150.66	0.79667	0.189737	4.19882	2.68315e-05	7.96761e-05	0.120474	FALSE
BW25113_4537	yecJ		1436.52	0.795397	0.107727	7.38344	1.54246e-13	1.09117e-12	6.92563e-10	FALSE
BW25113_2446	yffO	CPZ-55 prophage; predicted protein (NCBI)	53.559	0.794829	0.232988	3.41146	0.000646167	0.00153505	2.90129	FALSE
BW25113_0310	ykgH		66.5262	0.794794	0.346806	2.29175	0.0219199	0.0387515	98.4205	FALSE
BW25113_1531	marA	multiple antibiotic resistance; transcriptional activator of defense systems (VIMSS)	1264.28	0.792519	0.128374	6.17352	6.67866e-10	3.44551e-09	2.99872e-06	FALSE
BW25113_0156	erpA		5319.62	0.791912	0.0843852	9.38449	6.3222e-21	6.85492e-20	2.83867e-17	FALSE
BW25113_2060	wzc	orf, hypothetical protein (VIMSS)	913.488	0.788306	0.238378	3.30696	0.000943136	0.00217251	4.23468	FALSE
BW25113_0971	serT		75.606	0.787479	0.414007	1.90209	0.0571592	0.0915774	256.645	FALSE
BW25113_3870	glnA	glutamine synthetase (NCBI)	28723.3	0.787476	0.112282	7.01338	2.32631e-12	1.50974e-11	1.04451e-08	FALSE
BW25113_2646	ypjF	CP4-57 prophage; toxin of the YpjF-YfjZ toxin-antitoxin system (NCBI)	49.9588	0.786931	0.276534	2.84569	0.00443149	0.00904064	19.8974	FALSE
BW25113_1008	rutE	hypothetical protein (NCBI)	28.0297	0.786349	0.43405	1.81166	0.0700391	0.109357	314.476	FALSE
BW25113_3860	dsbA	periplasmic protein disulfide isomerase I (NCBI)	10140.6	0.786119	0.0736352	10.6759	1.32028e-26	1.92581e-25	5.92807e-23	FALSE
BW25113_0603	ybdO		59.9397	0.786088	0.385475	2.03927	0.0414228	0.0685228	185.988	FALSE
BW25113_3344	tusC		1149.63	0.78607	0.115403	6.81149	9.65915e-12	5.91706e-11	4.33696e-08	FALSE
BW25113_1589	ynfG	oxidoreductase, Fe-S subunit (NCBI)	95.0406	0.785229	0.211546	3.71186	0.000205741	0.000531321	0.923779	FALSE
BW25113_3859	srkA	predicted kinase (NCBI)	6325.36	0.783877	0.0687485	11.4021	4.08181e-30	7.28221e-29	1.83273e-26	FALSE
BW25113_1304	pspA	regulatory protein for phage-shock-protein operon (NCBI)	2562.68	0.783674	0.0826051	9.487	2.37769e-21	2.69552e-20	1.06758e-17	FALSE
BW25113_2451	eutA	reactivating factor for ethanolamine ammonia lyase (NCBI)	84.2409	0.782752	0.273276	2.86433	0.00417891	0.00855262	18.7633	FALSE
BW25113_0469	apt	adenine phosphoribosyltransferase (NCBI)	8944.78	0.777426	0.178591	4.3531	1.34227e-05	4.13389e-05	0.0602679	FALSE
BW25113_3739	atpI	membrane-bound ATP synthase, dispensable protein, affects expression of atpB (VIMSS)	11061.2	0.776752	0.168067	4.62169	3.80622e-06	1.25788e-05	0.0170899	FALSE
BW25113_1911	glyW		5150.27	0.775755	0.232674	3.33409	0.000855793	0.00199077	3.84251	FALSE
BW25113_1428	ydcK	predicted enzyme (NCBI)	256.831	0.775195	0.195799	3.95914	7.52214e-05	0.000208571	0.337744	FALSE
BW25113_1842	holE	DNA polymerase III, theta subunit (NCBI)	843.556	0.774921	0.151243	5.12368	2.99625e-07	1.14972e-06	0.00134532	FALSE
BW25113_1400	paaY	predicted hexapeptide repeat acetyltransferase (NCBI)	1048.37	0.774663	0.121763	6.36207	1.99052e-10	1.07912e-09	8.93745e-07	FALSE
BW25113_1203	ychF		20863.6	0.77241	0.144129	5.35914	8.3617e-08	3.4606e-07	0.00037544	FALSE
BW25113_3512	gadE	acid-responsive regulator of gadA and gadBC (Katherine Huang)	33.2586	0.77238	0.406424	1.90043	0.0573768	0.0918604	257.622	FALSE
BW25113_0186	ldcC	lysine decarboxylase 2, constitutive (NCBI)	1850.41	0.772279	0.105152	7.34442	2.06659e-13	1.45278e-12	9.279e-10	FALSE
BW25113_3742	mioC	flavodoxin (NCBI)	5386.34	0.771751	0.15904	4.85255	1.21885e-06	4.30441e-06	0.00547262	FALSE
BW25113_0630	lipB		3063.96	0.770431	0.108401	7.10722	1.18401e-12	7.93713e-12	5.31621e-09	FALSE
BW25113_1511	lsrK	putative kinase (VIMSS)	395.803	0.768982	0.169768	4.52961	5.90924e-06	1.90508e-05	0.0265325	FALSE
BW25113_1652	rnt		2032.99	0.768741	0.134162	5.72996	1.00454e-08	4.63745e-08	4.51038e-05	FALSE
BW25113_1182	hlyE		44.7629	0.768399	0.32732	2.34755	0.0188975	0.0339034	84.8496	FALSE
BW25113_4439	micF		21.8864	0.767945	0.448787	1.71116	0.0870525	0.132093	390.866	FALSE
BW25113_4280	yjhC	putative dehydrogenase (VIMSS)	737.854	0.767089	0.12449	6.16185	7.18986e-10	3.68799e-09	3.22825e-06	FALSE
BW25113_2195	dsbE	periplasmic thioredoxin of cytochrome c-type biogenesis (NCBI)	285.801	0.76647	0.136255	5.62528	1.85207e-08	8.26053e-08	8.31579e-05	FALSE
BW25113_2061	wzb	protein-tyrosine phosphatase (NCBI)	156.83	0.763488	0.320702	2.38068	0.0172808	0.031342	77.5907	FALSE
BW25113_3012	dkgA	orf, hypothetical protein (VIMSS)	975.29	0.760863	0.131423	5.78941	7.0636e-09	3.30866e-08	3.17156e-05	FALSE
BW25113_1624	ydgJ	orf, hypothetical protein (VIMSS)	3412.51	0.760741	0.0703055	10.8205	2.75221e-27	4.16365e-26	1.23574e-23	FALSE
BW25113_3866	yihI	hypothetical protein (NCBI)	4564.59	0.758301	0.0843173	8.99342	2.39655e-19	2.42252e-18	1.07605e-15	FALSE
BW25113_1181	ycgN	conserved protein (RefSeq)	1181.22	0.758262	0.104875	7.23014	4.82486e-13	3.32395e-12	2.16636e-09	FALSE
BW25113_1217	chaB	cation transport regulator (NCBI)	88.9542	0.757662	0.250318	3.02681	0.00247153	0.00530562	11.0972	FALSE
BW25113_2585	pssA		12124.9	0.757512	0.159788	4.74072	2.12957e-06	7.27956e-06	0.00956177	FALSE
BW25113_1657	ydhP	predicted transporter (NCBI)	623.337	0.757163	0.207059	3.65676	0.000255426	0.00064841	1.14686	FALSE
BW25113_1749	xthA	exonuclease III (NCBI)	5011.71	0.756934	0.0676157	11.1947	4.33074e-29	7.34586e-28	1.9445e-25	FALSE
BW25113_0874	ybjE	putative surface protein (VIMSS)	926.175	0.756558	0.187014	4.04546	5.22211e-05	0.000149042	0.234473	FALSE
BW25113_3976	thrU		6507.69	0.755443	0.182246	4.14519	3.3953e-05	9.96556e-05	0.152449	FALSE
BW25113_2152	yeiB	conserved inner membrane protein (NCBI)	1275.22	0.754806	0.0810081	9.31766	1.18939e-20	1.26811e-19	5.34036e-17	FALSE
BW25113_1424	opgD	glucan biosynthesis protein, periplasmic (RefSeq)	6725.75	0.754543	0.118189	6.38423	1.72259e-10	9.43001e-10	7.73442e-07	FALSE
BW25113_2695	serV		12431.9	0.753944	0.255577	2.94996	0.00317812	0.00667212	14.2698	FALSE
BW25113_3698	yidB	orf, hypothetical protein (VIMSS)	451.157	0.752827	0.176724	4.2599	2.04521e-05	6.16731e-05	0.09183	FALSE
BW25113_1533	eamA	orf, hypothetical protein (VIMSS)	725.835	0.751953	0.144207	5.2144	1.84412e-07	7.3015e-07	0.000828012	FALSE
BW25113_1375	ynaE		45.087	0.751718	0.318666	2.35895	0.0183266	0.0329716	82.2862	FALSE
BW25113_3977	tyrU	tRNA-Tyr (NCBI)	13500.8	0.751214	0.170825	4.39756	1.09477e-05	3.41154e-05	0.0491552	FALSE
BW25113_2317	dedA	conserved inner membrane protein (NCBI)	3165.64	0.748677	0.091811	8.15455	3.50493e-16	2.92274e-15	1.57372e-12	FALSE
BW25113_1810	yoaC	predicted protein (RefSeq)	427.066	0.748571	0.104441	7.16739	7.64414e-13	5.18643e-12	3.43222e-09	FALSE
BW25113_2347	yfdC	predicted inner membrane protein (NCBI)	229.758	0.747699	0.156771	4.76936	1.8481e-06	6.38564e-06	0.00829797	FALSE
BW25113_3428	glgP	glycogen phosphorylase (NCBI)	7602.58	0.747015	0.0883285	8.45723	2.73809e-17	2.49211e-16	1.2294e-13	FALSE
BW25113_0639	nadD		2375.54	0.745935	0.109019	6.84225	7.79616e-12	4.84878e-11	3.50047e-08	FALSE
BW25113_2752	cysD	sulfate adenylyltransferase subunit 2 (NCBI)	1107.57	0.744166	0.625613	1.1895	0.234244	0.313117	1051.75	FALSE
BW25113_4535	yniD		50.915	0.743799	0.276671	2.68839	0.00717968	0.014095	32.2368	FALSE
BW25113_1985	yeeO	predicted multidrug efflux system (RefSeq)	414.199	0.743117	0.19976	3.72004	0.000199188	0.000515288	0.894354	FALSE
BW25113_4550	arfA	hypothetical protein (NCBI)	291.076	0.741806	0.14286	5.19254	2.07446e-07	8.14863e-07	0.000931433	FALSE
BW25113_1532	marB		442.127	0.741585	0.162903	4.55232	5.3058e-06	1.7267e-05	0.023823	FALSE
BW25113_3369	yhfL	conserved secreted peptide (NCBI)	67.1371	0.741152	0.205364	3.60898	0.000307409	0.000769038	1.38027	FALSE
BW25113_3345	tusD		747.323	0.738711	0.120491	6.13082	8.74281e-10	4.43881e-09	3.92552e-06	FALSE
BW25113_4279	yjhB		275.748	0.737495	0.188639	3.90955	9.24678e-05	0.000252879	0.41518	FALSE
BW25113_1160	iraM		121.408	0.737344	0.338468	2.17847	0.0293709	0.0503725	131.875	FALSE
BW25113_3362	yhfG	hypothetical protein (NCBI)	138.453	0.735542	0.267283	2.75192	0.0059247	0.0118125	26.6019	FALSE
BW25113_2300	yfcE	orf, hypothetical protein (VIMSS)	3409.48	0.734968	0.0725698	10.1277	4.16159e-24	5.46498e-23	1.86855e-20	FALSE
BW25113_0888	trxB	thioredoxin reductase, FAD/NAD(P)-binding (NCBI)	21280.8	0.734536	0.0809648	9.07228	1.16549e-19	1.19157e-18	5.23307e-16	FALSE
BW25113_0885	aat	leucyl/phenylalanyl-tRNA--protein transferase (NCBI)	1270.15	0.734524	0.115423	6.36376	1.96874e-10	1.06861e-09	8.83965e-07	FALSE
BW25113_0326	yahL	hypothetical protein (NCBI)	23.146	0.734373	0.549363	1.33677	0.181297	0.252362	814.025	FALSE
BW25113_3474	yhhT	orf, hypothetical protein (VIMSS)	392.368	0.733457	0.136099	5.38914	7.07971e-08	2.96013e-07	0.000317879	FALSE
BW25113_2050	wcaI	predicted glycosyl transferase (NCBI)	659.826	0.731301	0.181183	4.03624	5.43139e-05	0.000154331	0.24387	FALSE
BW25113_2551	glyA		33081.1	0.730646	0.122021	5.98788	2.1259e-09	1.04269e-08	9.54528e-06	FALSE
BW25113_3486	rbbA	fused ribosome-associated ATPase: ATP-binding protein/ATP-binding protein/predicted membrane protein (NCBI)	1345.41	0.729755	0.147627	4.94323	7.68406e-07	2.78843e-06	0.00345014	FALSE
BW25113_1667	ydhR	hypothetical protein (NCBI)	1712.22	0.729533	0.114004	6.39916	1.56236e-10	8.58436e-10	7.015e-07	FALSE
BW25113_2478	dapA		25983.4	0.729294	0.086924	8.39002	4.86049e-17	4.38816e-16	2.18236e-13	FALSE
BW25113_1355	ydaG	orf, hypothetical protein (VIMSS)	19.0636	0.729237	0.424381	1.71836	0.0857318	0.130448	384.936	FALSE
BW25113_0570	cusS	sensory histidine kinase in two-component regulatory system with CusR, senses copper ions (NCBI)	869.49	0.728017	0.159889	4.55325	5.28225e-06	1.72154e-05	0.0237173	FALSE
BW25113_0638	cobC	predicted alpha-ribazole-5'-P phosphatase (NCBI)	986.743	0.727249	0.146532	4.96309	6.93815e-07	2.53625e-06	0.00311523	FALSE
BW25113_1431	ydcL	predicted lipoprotein (NCBI)	1392.16	0.727098	0.0953521	7.6254	2.43279e-14	1.82174e-13	1.09232e-10	FALSE
BW25113_0695	kdpD	fused sensory histidine kinase in two-component regulatory system with KdpE: signal sensing protein (NCBI)	1096.5	0.726102	0.109553	6.62785	3.40617e-11	2.00431e-10	1.52937e-07	FALSE
BW25113_0822	ybiV	predicted hydrolase (NCBI)	1948.49	0.726001	0.0909301	7.98416	1.41477e-15	1.13334e-14	6.35233e-12	FALSE
BW25113_1146	croE		20.2074	0.725797	0.463694	1.56525	0.117524	0.17221	527.683	FALSE
BW25113_3432	glgB	glycogen branching enzyme (NCBI)	6267.9	0.725	0.124773	5.81054	6.22715e-09	2.92604e-08	2.79599e-05	FALSE
BW25113_4006	purH	bifunctionalphosphoribosylaminoimidazolecarboxamide formyltransferase/IMP cyclohydrolase (NCBI)	1586.8	0.724406	0.122856	5.89637	3.71586e-09	1.77964e-08	1.66842e-05	FALSE
BW25113_0400	phoR	sensory histidine kinase in two-component regulatory system with PhoB (NCBI)	828.99	0.723584	0.100707	7.18501	6.72008e-13	4.58727e-12	3.01731e-09	FALSE
BW25113_0455	ffs		47.9911	0.720398	0.401072	1.79618	0.0724658	0.112518	325.371	FALSE
BW25113_2419	yfeK	hypothetical protein (NCBI)	245.734	0.719993	0.239031	3.01214	0.00259416	0.00555289	11.6478	FALSE
BW25113_3232	yhcM	conserved protein with nucleoside triphosphate hydrolase domain (NCBI)	2142.34	0.718886	0.166696	4.31257	1.61368e-05	4.93248e-05	0.0724544	FALSE
BW25113_2042	wcaN	predicted subunit with GalU (NCBI)	17577.7	0.713936	0.112136	6.36671	1.93123e-10	1.0508e-09	8.67122e-07	FALSE
BW25113_4618	tisB	lexA-regulated toxic peptide (RefSeq)	523.449	0.713264	0.111814	6.37902	1.78229e-10	9.72119e-10	8.00248e-07	FALSE
BW25113_1606	folM	short chain dehydrogenase (NCBI)	1180.67	0.712224	0.132456	5.37705	7.57176e-08	3.14822e-07	0.000339972	FALSE
BW25113_3430	glgC	glucose-1-phosphate adenylyltransferase (NCBI)	4433.2	0.709372	0.10954	6.47593	9.42307e-11	5.30774e-10	4.23096e-07	FALSE
BW25113_0019	nhaA	pH-dependent sodium/proton antiporter (NCBI)	5133.28	0.709284	0.111687	6.35067	2.14384e-10	1.15804e-09	9.62585e-07	FALSE
BW25113_1572	ydfB	orf, hypothetical protein (VIMSS)	30.6211	0.707852	0.444676	1.59184	0.111421	0.164451	500.282	FALSE
BW25113_0818	ybiR	predicted transporter (NCBI)	1924.78	0.707666	0.111833	6.32789	2.48535e-10	1.3265e-09	1.11592e-06	FALSE
BW25113_1360	ydaV	Rac prophage; predicted DNA replication protein (NCBI)	60.4503	0.706317	0.26881	2.62757	0.00859973	0.016599	38.6128	FALSE
BW25113_0342	lacA	galactoside O-acetyltransferase (NCBI)	60.7997	0.706314	0.254186	2.77873	0.00545713	0.0109731	24.5025	FALSE
BW25113_1013	rutR	predicted DNA-binding transcriptional regulator (NCBI)	1166.51	0.705586	0.109756	6.42868	1.28715e-10	7.16007e-10	5.7793e-07	FALSE
BW25113_3862	yihG	predicted endonuclease (NCBI)	725.401	0.704707	0.23549	2.99251	0.00276693	0.00588892	12.4235	FALSE
BW25113_1097	yceG	predicted aminodeoxychorismate lyase (NCBI)	1883.05	0.703612	0.102447	6.86807	6.50762e-12	4.08712e-11	2.92192e-08	FALSE
BW25113_4230	ytfT	predicted sugar transporter subunit: membrane component of ABC superfamily (RefSeq)	133.508	0.703335	0.237171	2.96552	0.00302176	0.00638275	13.5677	FALSE
BW25113_0412	yajI	orf, hypothetical protein (VIMSS)	523.48	0.703098	0.12348	5.69402	1.24084e-08	5.65834e-08	5.57138e-05	FALSE
BW25113_1669	ydhT	hypothetical protein (NCBI)	81.2421	0.703006	0.31069	2.26273	0.0236524	0.0413731	106.199	FALSE
BW25113_0830	gsiB	predicted peptide transporter subunit: periplasmic-binding component of ABC superfamily (NCBI)	1443.85	0.701541	0.0901423	7.78259	7.10529e-15	5.47633e-14	3.19028e-11	FALSE
BW25113_4248	yjgH	predicted mRNA endoribonuclease (NCBI)	130.52	0.701083	0.160581	4.36593	1.26585e-05	3.91741e-05	0.0568368	FALSE
BW25113_3960	argH	argininosuccinate lyase (NCBI)	1215.78	0.700363	0.0836345	8.3741	5.56476e-17	4.97385e-16	2.49858e-13	FALSE
BW25113_1494	pqqL	predicted peptidase (NCBI)	565.605	0.697926	0.113696	6.13854	8.32846e-10	4.24287e-09	3.73948e-06	FALSE
BW25113_3097	yqjC	orf, hypothetical protein (VIMSS)	4427.98	0.696707	0.0718883	9.69152	3.27626e-22	3.97591e-21	1.47104e-18	FALSE
BW25113_0337	codA	cytosine deaminase (NCBI)	2227.58	0.694857	0.0830216	8.3696	5.78165e-17	5.15742e-16	2.59596e-13	FALSE
BW25113_3072	aer	fused signal transducer for aerotaxis sensory component/methyl accepting chemotaxis component (NCBI)	532.288	0.692186	0.123325	5.61268	1.99213e-08	8.82371e-08	8.94468e-05	FALSE
BW25113_1332	ynaJ		2724.37	0.692148	0.188783	3.66636	0.000246028	0.000625974	1.10467	FALSE
BW25113_2924	mscS	mechanosensitive channel (NCBI)	4040.06	0.691947	0.143353	4.82688	1.38688e-06	4.87093e-06	0.00622708	FALSE
BW25113_0839	dacC	D-alanyl-D-alanine carboxypeptidase (penicillin-binding protein 6a) (NCBI)	4706.19	0.69136	0.115457	5.98803	2.12394e-09	1.04269e-08	9.53649e-06	FALSE
BW25113_1150	ymfR	e14 prophage; predicted protein (NCBI)	4.7261	0.691175	1.2402	0.557311	0.577315	0.656146	2592.14	FALSE
BW25113_0382	iraP	hypothetical protein (NCBI)	704.211	0.690791	0.107296	6.43816	1.20928e-10	6.75207e-10	5.42967e-07	FALSE
BW25113_1061	dinI	DNA damage-inducible protein I (NCBI)	765.403	0.690589	0.121341	5.69132	1.26062e-08	5.74267e-08	5.66017e-05	FALSE
BW25113_4645	psaA		4.40451	0.690006	0.749394	0.920753	0.35718	0.445456	1603.74	FALSE
BW25113_1643	ydhI	predicted inner membrane protein (NCBI)	193.124	0.689631	0.252781	2.72817	0.00636859	0.0126412	28.595	FALSE
BW25113_2153	folE		5631.84	0.689445	0.0732727	9.40931	4.99424e-21	5.48142e-20	2.24241e-17	FALSE
BW25113_2008	yeeA	conserved inner membrane protein (NCBI)	764.631	0.68943	0.100275	6.87541	6.18098e-12	3.90387e-11	2.77526e-08	FALSE
BW25113_0571	cusR	DNA-binding response regulator in two-component regulatory system with CusS (NCBI)	833.3	0.688922	0.116727	5.90201	3.59107e-09	1.72541e-08	1.61239e-05	FALSE
BW25113_1528	ydeA	sugar efflux transporter (NCBI)	388.948	0.688569	0.180536	3.81403	0.000136722	0.000363995	0.61388	FALSE
BW25113_4683	yqeL		2.83103	0.686898	1.05586	0.65056	0.51533	0.600794	2313.83	FALSE
BW25113_1984	asnW	tRNA-Asn (NCBI)	24.2218	0.686523	0.557616	1.23118	0.218257	0.295363	979.975	FALSE
BW25113_0226	dinJ	predicted antitoxin of YafQ-DinJ toxin-antitoxin system (NCBI)	1389.99	0.686202	0.135454	5.06595	4.06372e-07	1.53434e-06	0.00182461	FALSE
BW25113_1294	sapA	predicted antimicrobial peptide transporter subunit (NCBI)	3344.05	0.683877	0.0586643	11.6575	2.10213e-31	4.0228e-30	9.43858e-28	FALSE
BW25113_1471	yddK		5.8814	0.68376	1.37792	0.496225	0.619736	0.694663	2782.61	FALSE
BW25113_1363	trkG		517.558	0.683654	0.167331	4.08564	4.39564e-05	0.00012691	0.197364	FALSE
BW25113_2965	speC	ornithine decarboxylase isozyme (VIMSS)	2194.51	0.681233	0.0800696	8.50801	1.76938e-17	1.62696e-16	7.94452e-14	FALSE
BW25113_3617	kbl	2-amino-3-ketobutyrate coenzyme A ligase (NCBI)	27056	0.681072	0.0794088	8.57679	9.75612e-18	9.13973e-17	4.3805e-14	FALSE
BW25113_1128	roxA	orf, hypothetical protein (VIMSS)	9621.68	0.679738	0.0554732	12.2535	1.60965e-34	3.64041e-33	7.22732e-31	FALSE
BW25113_1438	hicB	predicted DNA-binding transcriptional regulator (RefSeq)	356.065	0.677534	0.116436	5.81894	5.9221e-09	2.78855e-08	2.65902e-05	FALSE
BW25113_3641	slmA	putative transcriptional regulator (VIMSS)	4658.75	0.677484	0.143266	4.72887	2.25777e-06	7.70015e-06	0.0101374	FALSE
BW25113_0831	gsiC	predicted peptide transporter subunit: membrane component of ABC superfamily (NCBI)	522.786	0.676719	0.129533	5.22429	1.74826e-07	6.96506e-07	0.000784971	FALSE
BW25113_1877	yecT	orf, hypothetical protein (VIMSS)	142.942	0.676219	0.289418	2.33648	0.0194664	0.0347987	87.4043	FALSE
BW25113_2742	nlpD	predicted outer membrane lipoprotein (NCBI)	30237.8	0.6749	0.119426	5.65119	1.59341e-08	7.17838e-08	7.15443e-05	FALSE
BW25113_1322	ycjF	hypothetical protein (NCBI)	2263.33	0.674889	0.14398	4.68737	2.76737e-06	9.32452e-06	0.0124255	FALSE
BW25113_3646	yicG	orf, hypothetical protein (VIMSS)	1638.89	0.674723	0.110604	6.10035	1.05833e-09	5.32496e-09	4.75191e-06	FALSE
BW25113_3449	ugpQ	cytoplasmic glycerophosphodiester phosphodiesterase (NCBI)	960.471	0.673967	0.0997545	6.75625	1.41607e-11	8.53457e-11	6.35817e-08	FALSE
BW25113_2186	yejK	nucleoid-associated protein NdpA (NCBI)	7648.97	0.672388	0.101756	6.60784	3.89958e-11	2.26784e-10	1.75091e-07	FALSE
BW25113_0878	macA	putative membrane protein (VIMSS)	996.556	0.670833	0.128859	5.20595	1.93006e-07	7.61483e-07	0.000866599	FALSE
BW25113_2762	cysH	phosphoadenosine phosphosulfate reductase (NCBI)	1954.57	0.669653	0.809334	0.827411	0.408004	0.495133	1831.94	FALSE
BW25113_0875	aqpZ	aquaporin Z (NCBI)	520.708	0.669332	0.16649	4.02025	5.81355e-05	0.000164454	0.261028	FALSE
BW25113_1612	fumA	fumarate hydratase (fumarase A), aerobic Class I (NCBI)	21895.6	0.668581	0.288486	2.31755	0.0204738	0.0364251	91.9276	FALSE
BW25113_0284	paoC	predicted oxidoreductase with molybdenum-binding domain (NCBI)	205.172	0.66775	0.189162	3.53004	0.000415502	0.00101784	1.86561	FALSE
BW25113_2057	wcaC	predicted glycosyl transferase (NCBI)	260.873	0.66719	0.201762	3.30682	0.000943624	0.00217252	4.23687	FALSE
BW25113_0817	mntR	DNA-binding transcriptional regulator of mntH (NCBI)	2022.49	0.666863	0.0893629	7.46241	8.49562e-14	6.05787e-13	3.81454e-10	FALSE
BW25113_2095	gatZ	D-tagatose 1,6-bisphosphate aldolase 2, subunit (NCBI)	167179	0.666242	0.170418	3.90947	9.25001e-05	0.000252879	0.415325	FALSE
BW25113_3959	argB	acetylglutamate kinase (RefSeq)	516.408	0.666192	0.156721	4.25082	2.12988e-05	6.41832e-05	0.0956318	FALSE
BW25113_0398	sbcD	exonuclease, dsDNA, ATP-dependent (NCBI)	1786.09	0.66603	0.0733759	9.07696	1.11651e-19	1.14672e-18	5.01312e-16	FALSE
BW25113_1962	yedJ	predicted phosphohydrolase (NCBI)	1022.63	0.664172	0.0719033	9.23703	2.53438e-20	2.64545e-19	1.13794e-16	FALSE
BW25113_2447	yffP	CPZ-55 prophage; predicted protein (NCBI)	93.6646	0.663755	0.229469	2.89256	0.0038211	0.00788884	17.1568	FALSE
BW25113_4675	yoaJ	expressed protein (RefSeq)	40.7279	0.662958	0.29203	2.27017	0.0231974	0.0406567	104.156	FALSE
BW25113_4508	peaD	putative sensory transduction regulator (VIMSS)	33.9449	0.659748	0.383906	1.71852	0.0857025	0.130447	384.804	FALSE
BW25113_4637	uof		2294.11	0.659673	0.119733	5.50953	3.59798e-08	1.54623e-07	0.000161549	FALSE
BW25113_0696	kdpC	potassium-transporting ATPase subunit C (NCBI)	144.209	0.658735	0.134839	4.88533	1.03256e-06	3.66677e-06	0.00463618	FALSE
BW25113_4641	yoeH		116.49	0.65855	0.241189	2.73043	0.00632512	0.0125661	28.3998	FALSE
BW25113_4058	uvrA	excinuclease ABC subunit A (NCBI)	8340.79	0.658295	0.0730463	9.01202	2.023e-19	2.04955e-18	9.08327e-16	FALSE
BW25113_0860	artJ	arginine transporter subunit (NCBI)	703.215	0.658242	0.125102	5.26164	1.4278e-07	5.73939e-07	0.000641081	FALSE
BW25113_1605	ydgI	predicted arginine/ornithine antiporter transporter (NCBI)	1668.91	0.658213	0.220887	2.97986	0.00288383	0.0061087	12.9484	FALSE
BW25113_2048	cpsG	phosphomannomutase (NCBI)	740.131	0.657816	0.147441	4.46155	8.13674e-06	2.57865e-05	0.036534	FALSE
BW25113_2562	yfhL	predicted 4Fe-4S cluster-containing protein (NCBI)	448.329	0.657446	0.273156	2.40685	0.0160909	0.0294221	72.2479	FALSE
BW25113_4262	lptG		6471.3	0.657052	0.111984	5.86736	4.42781e-09	2.11158e-08	1.98809e-05	FALSE
BW25113_0508	hyi	hydroxypyruvate isomerase (NCBI)	45.1908	0.656508	0.351183	1.86942	0.0615642	0.0977951	276.423	FALSE
BW25113_1640	anmK	anhydro-N-acetylmuramic acid kinase (NCBI)	1477.85	0.655235	0.136894	4.78646	1.6975e-06	5.88799e-06	0.00762177	FALSE
BW25113_3397	nudE	ADP-ribose diphosphatase (NCBI)	2889.56	0.654748	0.13611	4.81041	1.50618e-06	5.24468e-06	0.00676274	FALSE
BW25113_1235	rssB	response regulator of RpoS (NCBI)	2159.69	0.654656	0.0716621	9.13532	6.52116e-20	6.72852e-19	2.928e-16	FALSE
BW25113_0535	sfmZ	predicted DNA-binding transcriptional regulator (NCBI)	30.445	0.654028	0.451481	1.44863	0.147442	0.209668	662.013	FALSE
BW25113_4594	ymgJ	hypothetical protein (RefSeq)	8.82669	0.652342	0.641278	1.01725	0.309033	0.395725	1387.56	FALSE
BW25113_1383	ydbL	orf, hypothetical protein (VIMSS)	488.078	0.650193	0.111095	5.85261	4.83928e-09	2.3029e-08	2.17284e-05	FALSE
BW25113_1324	tpx	thiol peroxidase (NCBI)	35386	0.648531	0.0632799	10.2486	1.20055e-24	1.6193e-23	5.39047e-21	FALSE
BW25113_1321	ycjX	conserved protein with nucleoside triphosphate hydrolase domain (NCBI)	3344.82	0.648248	0.172549	3.7569	0.000172029	0.000452082	0.772412	FALSE
BW25113_0928	aspC	aspartate aminotransferase, PLP-dependent (NCBI)	10404.3	0.647774	0.10904	5.94072	2.83778e-09	1.37826e-08	1.27416e-05	FALSE
BW25113_3470	tusA		728.093	0.645784	0.173001	3.73284	0.000189333	0.000491782	0.850103	FALSE
BW25113_3658	selC	tRNA-Sec (NCBI)	36.017	0.645509	0.515326	1.25262	0.210343	0.28621	944.441	FALSE
BW25113_0544	ybcK		77.1132	0.641031	0.390441	1.64181	0.100629	0.150506	451.822	FALSE
BW25113_3066	dnaG		18447.6	0.640488	0.182316	3.51307	0.000442968	0.00107975	1.98892	FALSE
BW25113_0969	tusE		1622.49	0.639439	0.10706	5.97269	2.33368e-09	1.1421e-08	1.04782e-05	FALSE
BW25113_2315	folC		7153.39	0.639112	0.0996986	6.41044	1.45103e-10	8.0021e-10	6.51512e-07	FALSE
BW25113_3055	ygiM	predicted signal transduction protein (SH3 domain) (NCBI)	4142.87	0.637884	0.20581	3.09938	0.00193925	0.00424643	8.70723	FALSE
BW25113_0835	rimO	predicted SAM-dependent methyltransferase (NCBI)	6567.29	0.637509	0.201018	3.1714	0.00151708	0.00336979	6.81171	FALSE
BW25113_2731	fhlA	DNA-binding transcriptional activator (NCBI)	554.534	0.637113	0.106618	5.97566	2.29156e-09	1.12272e-08	1.02891e-05	FALSE
BW25113_2914	rpiA		11476.1	0.636936	0.0850888	7.48555	7.1249e-14	5.11303e-13	3.19908e-10	FALSE
BW25113_1430	tehB	predicted S-adenosyl-L-methionine-dependent methyltransferase (NCBI)	1898.5	0.636243	0.090571	7.02479	2.14384e-12	1.39537e-11	9.62586e-09	FALSE
BW25113_4485	ytfR	predicted sugar transporter subunit: ATP-binding component of ABC superfamily (NCBI)	358.48	0.636235	0.218703	2.90913	0.00362435	0.00752775	16.2733	FALSE
BW25113_4049	dusA	tRNA-dihydrouridine synthase A (RefSeq)	3616.16	0.632216	0.190347	3.3214	0.000895685	0.00207495	4.02163	FALSE
BW25113_0672	leuW		8725.08	0.631512	0.261586	2.41416	0.0157713	0.0289324	70.8133	FALSE
BW25113_4692	oweE		14.7708	0.631145	0.448333	1.40776	0.159202	0.224749	714.815	FALSE
BW25113_1729	ydjN	predicted transporter (NCBI)	5717.96	0.628902	0.510489	1.23196	0.217965	0.295128	978.661	FALSE
BW25113_3394	hofN	predicted fimbrial assembly protein (NCBI)	8.64435	0.62806	0.575955	1.09047	0.275507	0.358953	1237.03	FALSE
BW25113_3293	yhdN	hypothetical protein (NCBI)	963.051	0.62795	0.114459	5.48626	4.10532e-08	1.75752e-07	0.000184329	FALSE
BW25113_3520	yhjB	predicted DNA-binding response regulator in two-component regulatory system (NCBI)	235.378	0.627586	0.120247	5.21916	1.7974e-07	7.13541e-07	0.000807031	FALSE
BW25113_0321	yahG	hypothetical protein (NCBI)	122.668	0.627116	0.217392	2.88473	0.00391749	0.00806554	17.5895	FALSE
BW25113_1129	phoQ		13.0646	0.627041	0.519018	1.20813	0.226998	0.305071	1019.22	FALSE
BW25113_4567	yjjZ	hypothetical protein (NCBI)	248.958	0.626809	0.458001	1.36858	0.171132	0.239253	768.382	FALSE
BW25113_0806	mcbA	orf, hypothetical protein (VIMSS)	71.0143	0.626291	0.233686	2.68005	0.00736118	0.014426	33.0517	FALSE
BW25113_4078	yjcO	hypothetical protein (NCBI)	1143.52	0.62605	0.124698	5.02055	5.15235e-07	1.91949e-06	0.0023134	FALSE
BW25113_1338	abgA	putative aminohydrolase (EC 3.5.1.14) (VIMSS)	141.927	0.624336	0.229615	2.71906	0.00654682	0.0129491	29.3952	FALSE
BW25113_0832	gsiD	predicted peptide transporter subunit: membrane component of ABC superfamily (NCBI)	308.636	0.624175	0.15342	4.0684	4.73375e-05	0.00013597	0.212546	FALSE
BW25113_0046	kefF	glutathione-regulated potassium-efflux system ancillary protein (NCBI)	228.832	0.623723	0.14361	4.34316	1.40448e-05	4.31657e-05	0.063061	FALSE
BW25113_3816	corA	magnesium/nickel/cobalt transporter (NCBI)	9420.19	0.621132	0.170065	3.65233	0.000259875	0.000658585	1.16684	FALSE
BW25113_3149	diaA	DnaA initiator-associating factor for replication initiation (NCBI)	3416.53	0.620898	0.110458	5.62112	1.89728e-08	8.43696e-08	8.51878e-05	FALSE
BW25113_2687	luxS	S-ribosylhomocysteinase (NCBI)	7192.99	0.620268	0.0810489	7.653	1.96338e-14	1.47517e-13	8.81557e-11	FALSE
BW25113_2967	pheV		33.4461	0.619371	0.483015	1.2823	0.199737	0.274026	896.819	FALSE
BW25113_3817	yigF	conserved inner membrane protein (NCBI)	190.454	0.619135	0.251378	2.46296	0.0137796	0.025625	61.8703	FALSE
BW25113_2425	cysP	thiosulfate transporter subunit (NCBI)	893.808	0.618583	0.290942	2.12614	0.0334917	0.0565947	150.378	FALSE
BW25113_3068	mug	G/U mismatch-specific DNA glycosylase (NCBI)	1073.94	0.617576	0.0882742	6.99611	2.63161e-12	1.70048e-11	1.18159e-08	FALSE
BW25113_0530	sfmA	putative fimbrial-like protein (VIMSS)	26.6754	0.616163	0.36615	1.68281	0.0924109	0.139379	414.925	FALSE
BW25113_3778	rep	DNA helicase and single-stranded DNA-dependent ATPase (NCBI)	4304.35	0.616099	0.125461	4.91068	9.07625e-07	3.25148e-06	0.00407524	FALSE
BW25113_1168	ycgG	putative proteases (VIMSS)	77.0538	0.615897	0.287128	2.14503	0.0319504	0.0542769	143.457	FALSE
BW25113_0523	purE	phosphoribosylaminoimidazole carboxylase catalytic subunit (NCBI)	841.393	0.615611	0.132198	4.65674	3.21251e-06	1.07036e-05	0.0144242	FALSE
BW25113_2147	preA	putative oxidoreductase (VIMSS)	943.277	0.615318	0.327357	1.87966	0.0601551	0.0958628	270.096	FALSE
BW25113_4187	aidB	putative acyl coenzyme A dehydrogenase (VIMSS)	430.212	0.615158	0.142598	4.31392	1.60383e-05	4.9057e-05	0.0720119	FALSE
BW25113_1761	gdhA	glutamate dehydrogenase (NCBI)	5890.19	0.614642	0.12615	4.87231	1.103e-06	3.91382e-06	0.00495248	FALSE
BW25113_2813	mltA	membrane-bound lytic murein transglycosylase A (NCBI)	5382.08	0.614502	0.104831	5.86185	4.57729e-09	2.18054e-08	2.0552e-05	FALSE
BW25113_1382	ynbE	predicted lipoprotein (NCBI)	250.196	0.6138	0.133635	4.59313	4.36653e-06	1.43563e-05	0.0196057	FALSE
BW25113_2867	xdhB	xanthine dehydrogenase, FAD-binding subunit (NCBI)	148.68	0.613609	0.252422	2.43088	0.0150621	0.0277794	67.629	FALSE
BW25113_1537	ydeJ	competence damage-inducible protein A (NCBI)	147.45	0.61274	0.223616	2.74014	0.00614123	0.0122219	27.5741	FALSE
BW25113_4392	slt	soluble lytic murein transglycosylase (VIMSS)	2569.4	0.612147	0.0947805	6.45858	1.05693e-10	5.92355e-10	4.7456e-07	FALSE
BW25113_2089	insF1		705.943	0.611334	0.118641	5.1528	2.56622e-07	9.9322e-07	0.00115223	FALSE
BW25113_0527	ybcI	conserved inner membrane protein (NCBI)	257.79	0.610934	0.143959	4.2438	2.19769e-05	6.60486e-05	0.0986762	FALSE
BW25113_2559	tadA		1795.34	0.610622	0.170027	3.59133	0.000329	0.000818935	1.47721	FALSE
BW25113_0931	pncB	nicotinate phosphoribosyltransferase (NCBI)	10622.8	0.610619	0.0963854	6.33518	2.37062e-10	1.26981e-09	1.06441e-06	FALSE
BW25113_0215	dnaQ		2411.73	0.609274	0.0960849	6.34099	2.2829e-10	1.2287e-09	1.02502e-06	FALSE
BW25113_2175	mepS	predicted peptidase, outer membrane lipoprotein (NCBI)	22648.8	0.608621	0.188883	3.22222	0.00127204	0.00285953	5.71144	FALSE
BW25113_1242	ychE	predicted inner membrane protein (NCBI)	829.781	0.605733	0.131612	4.60242	4.176e-06	1.37703e-05	0.0187502	FALSE
BW25113_4513	kdpF	potassium ion accessory transporter subunit (NCBI)	2.61058	0.603852	1.0126	0.59634	0.550948	0.633413	2473.76	FALSE
BW25113_1358	ydaT	Rac prophage; predicted protein (NCBI)	61.4057	0.603564	0.263903	2.28707	0.0221919	0.039155	99.6417	FALSE
BW25113_1821	mntP	orf, hypothetical protein (VIMSS)	251.255	0.603556	0.207209	2.91279	0.00358211	0.00744692	16.0837	FALSE
BW25113_2318	truA	tRNA pseudouridine synthase A (NCBI)	15.7746	0.602729	0.400911	1.5034	0.132736	0.191926	595.986	FALSE
BW25113_2671	ygaC	hypothetical protein (NCBI)	1093.83	0.602021	0.170294	3.53519	0.000407482	0.00100039	1.8296	FALSE
BW25113_1553	rzpQ	Qin prophage; conserved protein (NCBI)	10.2579	0.601647	0.602238	0.999018	0.317786	0.404504	1426.86	FALSE
BW25113_0858	ybjO	predicted inner membrane protein (NCBI)	319.418	0.600955	0.152048	3.95241	7.73671e-05	0.000213726	0.347378	FALSE
BW25113_0514	glxK	glycerate kinase II (NCBI)	202.309	0.600862	0.168151	3.57334	0.000352451	0.000872939	1.5825	FALSE
BW25113_2770	ygcR	putative transport protein (VIMSS)	70.0912	0.60023	0.23735	2.52888	0.0114426	0.0216021	51.3774	FALSE
BW25113_3431	glgX	glycogen debranching enzyme (NCBI)	4645.58	0.599804	0.11811	5.07837	3.80684e-07	1.43857e-06	0.00170927	FALSE
BW25113_2490	hyfJ	putative protein processing element (VIMSS)	61.7141	0.598716	0.265715	2.25323	0.0242448	0.0422538	108.859	FALSE
BW25113_4532	hicA	orf, hypothetical protein (VIMSS)	170.644	0.597446	0.207694	2.87657	0.00402017	0.0082466	18.0506	FALSE
BW25113_1794	yeaP	orf, hypothetical protein (VIMSS)	2103.02	0.597308	0.0967564	6.17332	6.68697e-10	3.44583e-09	3.00245e-06	FALSE
BW25113_0927	ycbL	predicted metal-binding enzyme (NCBI)	7231.59	0.596648	0.115691	5.15724	2.50618e-07	9.70821e-07	0.00112528	FALSE
BW25113_1539	ydfG	L-allo-threonine dehydrogenase, NAD(P)-binding (NCBI)	8766.28	0.59657	0.134706	4.42868	9.48123e-06	2.9711e-05	0.0425707	FALSE
BW25113_4383	deoB	phosphopentomutase (NCBI)	63830.9	0.596013	0.106444	5.59933	2.15178e-08	9.49326e-08	9.66148e-05	FALSE
BW25113_0934	ssuC	putative transport system permease protein (VIMSS)	54.9938	0.595754	0.36983	1.61089	0.107204	0.159171	481.348	FALSE
BW25113_2817	amiC	putative amidase (VIMSS)	5295.63	0.595128	0.174662	3.40731	0.000656064	0.00155607	2.94573	FALSE
BW25113_1796	yoaG	hypothetical protein (NCBI)	45.0206	0.594886	0.379466	1.56769	0.116953	0.171598	525.121	FALSE
BW25113_2470	acrD	aminoglycoside/multidrug efflux system (NCBI)	1259.74	0.594401	0.0610085	9.74292	1.97781e-22	2.41325e-21	8.88037e-19	FALSE
BW25113_0910	cmk		22035.7	0.591695	0.0894986	6.61123	3.81143e-11	2.22161e-10	1.71133e-07	FALSE
BW25113_3198	kdsC	3-deoxy-D-manno-octulosonate 8-phosphate phosphatase (NCBI)	3750.57	0.591114	0.0874016	6.7632	1.34976e-11	8.16788e-11	6.06043e-08	FALSE
BW25113_0738	tolR	membrane spanning protein in TolA-TolQ-TolR complex (NCBI)	3189.28	0.591096	0.190153	3.10852	0.00188025	0.00412531	8.44232	FALSE
BW25113_2014	plaP	putative amino acid/amine transport protein (VIMSS)	28093	0.591042	0.242589	2.43639	0.0148345	0.027416	66.6069	FALSE
BW25113_4060	yjcB	orf, hypothetical protein (VIMSS)	250.203	0.590872	0.20454	2.88878	0.00386736	0.00796964	17.3644	FALSE
BW25113_4693	aaaE		57.6651	0.59087	0.338695	1.74455	0.0810635	0.12413	363.975	FALSE
BW25113_1972	yedZ	hypothetical protein (NCBI)	117.145	0.590404	0.251988	2.34298	0.0191302	0.0342797	85.8946	FALSE
BW25113_1456	rhsE	rhsE element core protein RshE (RefSeq)	102.758	0.590229	0.239626	2.46313	0.0137731	0.0256235	61.8411	FALSE
BW25113_1639	mliC	orf, hypothetical protein (VIMSS)	482.693	0.589657	0.126515	4.66075	3.15052e-06	1.05284e-05	0.0141459	FALSE
BW25113_0697	kdpB	potassium-transporting ATPase subunit B (NCBI)	164.218	0.589583	0.178666	3.29991	0.000967156	0.00222327	4.34253	FALSE
BW25113_2194	ccmH	heme lyase, CcmH subunit (NCBI)	575.694	0.589072	0.152913	3.85232	0.000117004	0.000315628	0.525347	FALSE
BW25113_4698	mgrR	sRNA antisense regulator down regulates YgdQ and EptB, PhoPQ-regulated, Hfq-dependent; affects sensitivity to antimicrobial peptides (RefSeq)	211.343	0.588727	0.227337	2.58967	0.00960679	0.0183686	43.1345	FALSE
BW25113_1629	rsxC	electron transport complex protein RnfC (NCBI)	6183.35	0.58779	0.167363	3.51207	0.000444633	0.00108269	1.9964	FALSE
BW25113_1857	znuA	putative adhesin (VIMSS)	7296.11	0.586608	0.0794875	7.37987	1.58439e-13	1.11907e-12	7.1139e-10	FALSE
BW25113_0495	ybbA	predicted transporter subunit: ATP-binding component of ABC superfamily (NCBI)	584.563	0.586099	0.135966	4.31064	1.62783e-05	4.96556e-05	0.0730897	FALSE
BW25113_1029	ycdU	predicted inner membrane protein (NCBI)	43.4733	0.585782	0.306498	1.91121	0.0559777	0.0897809	251.34	FALSE
BW25113_0182	lpxB		8996.44	0.584955	0.146842	3.98356	6.78917e-05	0.000190131	0.304834	FALSE
BW25113_3190	ibaG	orf, hypothetical protein (VIMSS)	4473.21	0.584438	0.0915609	6.38306	1.73588e-10	9.49115e-10	7.79408e-07	FALSE
BW25113_1429	tehA		783.604	0.582151	0.105461	5.52005	3.3891e-08	1.46067e-07	0.00015217	FALSE
BW25113_1844	exoX	exodeoxyribonuclease X (NCBI)	1198.25	0.581901	0.142474	4.08428	4.42146e-05	0.000127491	0.198523	FALSE
BW25113_3434	yhgN	predicted antibiotic transporter (NCBI)	1192.85	0.581484	0.114417	5.08215	3.73189e-07	1.41263e-06	0.00167562	FALSE
BW25113_2273	yfbN		35.0696	0.581334	0.45911	1.26622	0.205435	0.280554	922.401	FALSE
BW25113_1860	ruvB		3311.74	0.580345	0.0611457	9.49118	2.28441e-21	2.59634e-20	1.0257e-17	FALSE
BW25113_2681	ygaY	predicted transporter (pseudogene) (RefSeq)	404.059	0.579949	0.145622	3.98255	6.81783e-05	0.000190576	0.306121	FALSE
BW25113_1152	jayE	orf, hypothetical protein (VIMSS)	23.421	0.579879	0.673591	0.860876	0.389306	0.477497	1747.99	FALSE
BW25113_1991	cobT	nicotinate-nucleotide--dimethylbenzimidazolephosphoribosyltransferase (NCBI)	1521.43	0.57947	0.0920676	6.29397	3.09452e-10	1.63991e-09	1.38944e-06	FALSE
BW25113_1155	tfaP	e14 prophage; predicted protein (NCBI)	15.9669	0.578983	0.520325	1.11273	0.265823	0.348261	1193.55	FALSE
BW25113_2316	accD		31026.8	0.578624	0.100062	5.78263	7.35398e-09	3.4339e-08	3.30194e-05	FALSE
BW25113_0265	insA		259.952	0.576218	0.166058	3.46997	0.000520507	0.00125584	2.33708	FALSE
BW25113_1293	sapB	predicted antimicrobial peptide transporter subunit (NCBI)	1713.88	0.575356	0.115899	4.96428	6.89582e-07	2.52283e-06	0.00309622	FALSE
BW25113_2047	wcaJ	predicted UDP-glucose lipid carrier transferase (NCBI)	289.498	0.574617	0.186687	3.07797	0.00208414	0.00453046	9.35777	FALSE
BW25113_0225	yafQ	predicted toxin of the YafQ-DinJ toxin-antitoxin system (NCBI)	632.299	0.574236	0.148897	3.8566	0.000114975	0.00031053	0.516239	FALSE
BW25113_1867	yecD	orf, hypothetical protein (VIMSS)	1504.4	0.573932	0.140867	4.07428	4.61566e-05	0.000132673	0.207243	FALSE
BW25113_0126	can		17264.5	0.573344	0.0839282	6.83136	8.41147e-12	5.20256e-11	3.77675e-08	FALSE
BW25113_2265	menF	isochorismate hydroxymutase 2, menaquinone biosynthesis (VIMSS)	2961.43	0.573267	0.0833125	6.88093	5.94625e-12	3.76092e-11	2.66987e-08	FALSE
BW25113_0183	rnhB	ribonuclease HII (NCBI)	3554.14	0.572859	0.160904	3.56025	0.000370507	0.000914121	1.66358	FALSE
BW25113_0740	tolB	translocation protein TolB precursor (NCBI)	35696.8	0.572657	0.0693859	8.25323	1.54174e-16	1.32768e-15	6.92243e-13	FALSE
BW25113_4246	pyrL	pyrBI operon leader peptide (NCBI)	30.6762	0.572105	0.301693	1.89632	0.0579182	0.0926609	260.053	FALSE
BW25113_0196	rcsF	predicted outer membrane protein, signal (NCBI)	2620.13	0.571775	0.110744	5.16305	2.42955e-07	9.44404e-07	0.00109087	FALSE
BW25113_4493	gapC		6159.92	0.570904	0.0892736	6.39499	1.60553e-10	8.79997e-10	7.20884e-07	FALSE
BW25113_2543	yphA	predicted inner membrane protein (RefSeq)	193.566	0.569992	0.170839	3.33644	0.0008486	0.00197507	3.81021	FALSE
BW25113_1687	ydiJ	predicted FAD-linked oxidoreductase (NCBI)	3914.73	0.569314	0.113234	5.02778	4.96194e-07	1.85627e-06	0.00222791	FALSE
BW25113_1245	oppC	oligopeptide transporter subunit (NCBI)	17784.8	0.569174	0.0762613	7.46348	8.42679e-14	6.01837e-13	3.78363e-10	FALSE
BW25113_0367	tauC	taurine transporter subunit (NCBI)	41.5688	0.56782	0.277682	2.04485	0.0408695	0.0677326	183.504	FALSE
BW25113_0477	gsk	inosine/guanosine kinase (NCBI)	5058.83	0.566933	0.160164	3.5397	0.000400582	0.000984527	1.79862	FALSE
BW25113_0704	ybfC		29.4452	0.566572	0.443096	1.27867	0.201014	0.275273	902.555	FALSE
BW25113_4548	ypjJ	hypothetical protein (NCBI)	13.7911	0.565945	0.464611	1.2181	0.223185	0.301118	1002.1	FALSE
BW25113_3598	yibI	predicted inner membrane protein (NCBI)	44.6467	0.565008	0.464037	1.21759	0.223378	0.301151	1002.97	FALSE
BW25113_2078	baeS	sensory histidine kinase in two-component regulatory system with BaeR (NCBI)	366.804	0.564607	0.125603	4.49516	6.95164e-06	2.22036e-05	0.0312129	FALSE
BW25113_1710	btuE	predicted glutathione peroxidase (NCBI)	1574.93	0.564375	0.0996522	5.66345	1.48361e-08	6.7107e-08	6.66139e-05	FALSE
BW25113_2010	dacD	penicillin binding protein 6b (VIMSS)	562.435	0.563573	0.159415	3.53525	0.000407389	0.00100039	1.82918	FALSE
BW25113_1004	wrbA	TrpR binding protein WrbA (NCBI)	1501.29	0.563573	0.406011	1.38808	0.165114	0.232145	741.363	FALSE
BW25113_1131	purB		11717.7	0.5635	0.0861402	6.54166	6.08389e-11	3.47053e-10	2.73167e-07	FALSE
BW25113_0048	folA		5295.18	0.562188	0.137274	4.09536	4.21516e-05	0.000122251	0.189261	FALSE
BW25113_1032	serX		25.4356	0.560962	0.66611	0.842147	0.399706	0.486894	1794.68	FALSE
BW25113_1650	nemA	N-ethylmaleimide reductase, FMN-linked (NCBI)	3434.18	0.560844	0.0684598	8.19231	2.56263e-16	2.16927e-15	1.15062e-12	FALSE
BW25113_1496	yddA	fused predicted multidrug transporter subunits of ABC superfamily: membrane component/ATP-binding component (NCBI)	153.18	0.559388	0.175478	3.1878	0.0014336	0.00319704	6.43686	FALSE
BW25113_3485	yhhJ	predicted transporter subunit: membrane component of ABC superfamily (RefSeq)	467.794	0.559177	0.132295	4.22673	2.37108e-05	7.08431e-05	0.106461	FALSE
BW25113_2555	yfhG	hypothetical protein (NCBI)	952.24	0.559134	0.118824	4.70555	2.53182e-06	8.56307e-06	0.0113679	FALSE
BW25113_0741	pal	peptidoglycan-associated outer membrane lipoprotein (NCBI)	47740.4	0.558124	0.0830472	6.72057	1.81019e-11	1.0866e-10	8.12778e-08	FALSE
BW25113_1588	ynfF	oxidoreductase subunit (RefSeq)	404.538	0.557958	0.137978	4.04383	5.25851e-05	0.000149794	0.236107	FALSE
BW25113_0444	queC	predicted aluminum resistance protein (NCBI)	3836.32	0.557953	0.0706025	7.90274	2.72835e-15	2.16623e-14	1.22503e-11	FALSE
BW25113_1491	yddW	predicted liprotein (NCBI)	1323.98	0.555114	0.117658	4.71803	2.38138e-06	8.0909e-06	0.0106924	FALSE
BW25113_3206	npr	phosphohistidinoprotein-hexose phosphotransferase component of N-regulated PTS system (Npr) (NCBI)	862.178	0.553683	0.12698	4.36041	1.29818e-05	4.01466e-05	0.0582881	FALSE
BW25113_3263	yhdU	predicted membrane protein (NCBI)	69.2991	0.552985	0.381619	1.44905	0.147324	0.209567	661.485	FALSE
BW25113_4041	plsB	glycerol-3-phosphate acyltransferase (VIMSS)	17205	0.552013	0.103489	5.33401	9.60698e-08	3.9468e-07	0.000431354	FALSE
BW25113_0485	glsA	predicted glutaminase (NCBI)	141.642	0.552008	0.297733	1.85404	0.063734	0.100884	286.165	FALSE
BW25113_4592	cbdX	hypothetical protein (RefSeq)	42.4361	0.551474	0.251845	2.18973	0.0285435	0.0491418	128.16	FALSE
BW25113_3744	asnA	asparagine synthetase AsnA (NCBI)	7078.1	0.550253	0.0915191	6.01244	1.82752e-09	9.01281e-09	8.20556e-06	FALSE
BW25113_4438	cyaR	sRNA effector of ompX mRNA instability, cAMP-induced; hfq-dependent (RefSeq)	236.931	0.550189	0.252344	2.18032	0.029234	0.0501812	131.261	FALSE
BW25113_1287	yciW	putative oxidoreductase (VIMSS)	580.468	0.549702	0.163459	3.36294	0.00077118	0.00181088	3.4626	FALSE
BW25113_3821	pldA	outer membrane phospholipase A (NCBI)	3847.65	0.548843	0.129675	4.23243	2.31177e-05	6.91523e-05	0.103798	FALSE
BW25113_0049	apaH	diadenosinetetraphosphatase (NCBI)	3375.38	0.548706	0.100897	5.4383	5.37921e-08	2.27246e-07	0.000241526	FALSE
BW25113_1527	yneK	hypothetical protein (NCBI)	37.5916	0.548121	0.374036	1.46542	0.142806	0.204308	641.197	FALSE
BW25113_1767	ansA	cytoplasmic asparaginase I (NCBI)	6275.12	0.546962	0.0906892	6.03117	1.62782e-09	8.05455e-09	7.3089e-06	FALSE
BW25113_3640	dut		5811.81	0.546535	0.0957334	5.70893	1.1369e-08	5.21088e-08	5.10467e-05	FALSE
BW25113_0545	ybcL	DLP12 prophage; predicted kinase inhibitor (NCBI)	71.6757	0.544955	0.229358	2.376	0.0175012	0.0316905	78.5805	FALSE
BW25113_1340	smrA		560.385	0.543805	0.125791	4.32308	1.53867e-05	4.71282e-05	0.0690861	FALSE
BW25113_0343	lacY	galactoside permease (NCBI)	84.6636	0.543115	0.29228	1.8582	0.0631403	0.10005	283.5	FALSE
BW25113_0973	hyaB	hydrogenase 1, large subunit (NCBI)	60.1409	0.541981	0.369671	1.46611	0.142617	0.204103	640.351	FALSE
BW25113_2423	cysW	sulfate/thiosulfate transporter subunit (NCBI)	471.546	0.541882	0.411242	1.31767	0.187613	0.259575	842.384	FALSE
BW25113_2301	yfcF	predicted enzyme (NCBI)	441.627	0.539504	0.158435	3.40521	0.000661141	0.00156562	2.96852	FALSE
BW25113_1668	ydhS	conserved protein with FAD/NAD(P)-binding domain (NCBI)	285.641	0.538917	0.141715	3.80282	0.000143056	0.00038018	0.64232	FALSE
BW25113_3615	waaH	predicted glycosyl transferase (NCBI)	316.618	0.538707	0.176622	3.05006	0.00228798	0.00493524	10.273	FALSE
BW25113_2133	dld	D-lactate dehydrogenase, FAD-binding, NADH independent (NCBI)	5895.48	0.538636	0.109884	4.90187	9.49264e-07	3.39472e-06	0.00426219	FALSE
BW25113_2223	atoE	short chain fatty acid transporter (NCBI)	50.5284	0.537871	0.480787	1.11873	0.263255	0.345604	1182.01	FALSE
BW25113_4602	ynhF		61.925	0.537472	0.276627	1.94295	0.052022	0.0842207	233.579	FALSE
BW25113_1753	ynjA	hypothetical protein (NCBI)	250.88	0.536802	0.190318	2.82055	0.00479408	0.00972279	21.5254	FALSE
BW25113_0661	miaB	isopentenyl-adenosine A37 tRNA methylthiolase (NCBI)	14229.6	0.53662	0.132441	4.05176	5.08348e-05	0.000145456	0.228248	FALSE
BW25113_0811	glnH	glutamine ABC transporter periplasmic protein (NCBI)	5759.81	0.536496	0.134839	3.9788	6.92633e-05	0.000193367	0.310992	FALSE
BW25113_2764	cysJ	sulfite reductase, alpha subunit, flavoprotein (NCBI)	2383.58	0.535922	0.38258	1.40081	0.16127	0.227455	724.104	FALSE
BW25113_1351	racC		11.5	0.535695	0.573335	0.934349	0.350124	0.437989	1572.06	FALSE
BW25113_3346	yheO	orf, hypothetical protein (VIMSS)	5203.76	0.534628	0.0813069	6.57543	4.85133e-11	2.79592e-10	2.17825e-07	FALSE
BW25113_4676	yoaK		151.753	0.534127	0.191188	2.79373	0.00521041	0.010529	23.3947	FALSE
BW25113_0853	ybjN	predicted oxidoreductase (NCBI)	3076.92	0.533547	0.0693546	7.69302	1.43701e-14	1.09251e-13	6.45216e-11	FALSE
BW25113_1800	dmlA	predicted dehydrogenase (NCBI)	220.843	0.533155	0.186211	2.86317	0.0041942	0.00858	18.832	FALSE
BW25113_0546	ybcM	DLP12 prophage; predicted DNA-binding transcriptional regulator (NCBI)	231.612	0.532744	0.17826	2.98857	0.00280282	0.00595099	12.5847	FALSE
BW25113_2053	gmd	GDP-D-mannose dehydratase, NAD(P)-binding (NCBI)	1929.57	0.532684	0.156393	3.40606	0.00065908	0.00156157	2.95927	FALSE
BW25113_1688	ydiK	predicted inner membrane protein (NCBI)	2384.65	0.530967	0.0812378	6.53596	6.32034e-11	3.60083e-10	2.83783e-07	FALSE
BW25113_4005	purD	phosphoribosylamine--glycine ligase (NCBI)	1245.35	0.530674	0.105685	5.02127	5.13303e-07	1.91548e-06	0.00230473	FALSE
BW25113_1671	ydhX	predicted 4Fe-4S ferridoxin-type protein (RefSeq)	70.3541	0.530463	0.245008	2.16509	0.030381	0.0518271	136.411	FALSE
BW25113_2072	yegK	hypothetical protein (NCBI)	78.0654	0.530317	0.31583	1.67912	0.0931281	0.140413	418.145	FALSE
BW25113_3058	folB		1024.66	0.529743	0.105687	5.01236	5.37658e-07	1.99804e-06	0.00241408	FALSE
BW25113_3338	chiA	periplasmic endochitinase (NCBI)	1924.47	0.528679	0.083065	6.36465	1.95741e-10	1.06375e-09	8.78877e-07	FALSE
BW25113_4601	ydgU		15.4721	0.528411	0.483835	1.09213	0.274775	0.358209	1233.74	FALSE
BW25113_4167	nnr	predicted carbohydrate kinase (NCBI)	2033.06	0.528286	0.122803	4.3019	1.69337e-05	5.15188e-05	0.0760324	FALSE
BW25113_1651	gloA	glyoxalase I, Ni-dependent (NCBI)	4295.45	0.52755	0.0939283	5.61652	1.94843e-08	8.64726e-08	8.74847e-05	FALSE
BW25113_1221	narL	DNA-binding response regulator in two-component regulatory system with NarX (or NarQ) (NCBI)	1944.04	0.527411	0.13997	3.76802	0.000164551	0.000434724	0.738832	FALSE
BW25113_0143	pcnB	poly(A) polymerase I (VIMSS)	15063.1	0.527361	0.179252	2.94201	0.00326091	0.00683311	14.6415	FALSE
BW25113_4578	insP		148.068	0.526583	0.240631	2.18835	0.0286445	0.0492966	128.614	FALSE
BW25113_0929	ompF	outer membrane porin 1a (Ia;b;F) (NCBI)	254580	0.526506	0.128655	4.09239	4.26947e-05	0.000123586	0.191699	FALSE
BW25113_3205	yhbJ	hypothetical protein (NCBI)	6273.44	0.526392	0.113849	4.62358	3.7717e-06	1.24739e-05	0.016935	FALSE
BW25113_3826	yigL	predicted hydrolase (NCBI)	2176.56	0.525968	0.107306	4.90159	9.50642e-07	3.39472e-06	0.00426838	FALSE
BW25113_1535	dgcZ	hypothetical protein (NCBI)	832.037	0.524388	0.140116	3.74253	0.000182179	0.000475405	0.817981	FALSE
BW25113_2751	cysN	sulfate adenylyltransferase subunit 1 (NCBI)	2053.93	0.52412	0.600543	0.872744	0.382802	0.471061	1718.78	FALSE
BW25113_1132	hflD	hypothetical protein (NCBI)	3469.4	0.52297	0.139137	3.75867	0.000170818	0.000449427	0.766975	FALSE
BW25113_3262	yhdJ	putative methyltransferase (VIMSS)	215.681	0.522839	0.219131	2.38597	0.0170343	0.03092	76.4841	FALSE
BW25113_0233	yafO	predicted toxin of the YafO-YafN toxin-antitoxin system (NCBI)	326.715	0.520986	0.152199	3.42307	0.000619181	0.00147537	2.78012	FALSE
BW25113_2435	amiA	N-acetylmuramoyl-l-alanine amidase I (NCBI)	2986.49	0.520613	0.0848775	6.1337	8.58562e-10	4.36395e-09	3.85494e-06	FALSE
BW25113_4638	ttcC		14.8963	0.520538	0.498256	1.04472	0.296152	0.381193	1329.72	FALSE
BW25113_0657	lnt		6517.38	0.520061	0.143334	3.62831	0.00028528	0.000717285	1.28091	FALSE
BW25113_4527	ydaF	orf, hypothetical protein (VIMSS)	15.2121	0.518479	0.49336	1.05091	0.293298	0.377981	1316.91	FALSE
BW25113_4028	yjbG	hypothetical protein (NCBI)	10.1503	0.517223	0.585556	0.883302	0.377073	0.465417	1693.06	FALSE
BW25113_0683	fur	ferric uptake regulator (NCBI)	16236.8	0.51707	0.0616938	8.38123	5.23784e-17	4.70041e-16	2.35179e-13	FALSE
BW25113_1409	ynbB		18.4835	0.516371	0.398554	1.29561	0.19511	0.268584	876.044	FALSE
BW25113_0974	hyaC	hydrogenase 1, b-type cytochrome subunit (NCBI)	49.8381	0.514561	0.2726	1.8876	0.0590792	0.0942824	265.265	FALSE
BW25113_3822	recQ	ATP-dependent DNA helicase (NCBI)	4428.81	0.514111	0.136958	3.75378	0.00017419	0.000456688	0.782114	FALSE
BW25113_1809	yoaB	orf, hypothetical protein (VIMSS)	3656.18	0.512651	0.082193	6.23716	4.4558e-10	2.32012e-09	2.00065e-06	FALSE
BW25113_0112	aroP	aromatic amino acid transporter (NCBI)	2092.62	0.511473	0.0912771	5.60352	2.10038e-08	9.27566e-08	9.43072e-05	FALSE
BW25113_1813	nudL	predicted NUDIX hydrolase (NCBI)	827.809	0.511081	0.100074	5.10704	3.27252e-07	1.244e-06	0.00146936	FALSE
BW25113_0047	kefC	glutathione-regulated potassium-efflux system protein (NCBI)	944.188	0.510005	0.10893	4.68194	2.84172e-06	9.5463e-06	0.0127593	FALSE
BW25113_1780	yeaD	orf, hypothetical protein (VIMSS)	5143.29	0.509347	0.121515	4.19164	2.76939e-05	8.2128e-05	0.124346	FALSE
BW25113_3686	ibpB	heat shock chaperone (NCBI)	586.447	0.508245	0.28783	1.76578	0.0774329	0.119361	347.674	FALSE
BW25113_1193	emtA	murein transglycosylase E (VIMSS)	2570.26	0.508081	0.111281	4.56576	4.97687e-06	1.62556e-05	0.0223461	FALSE
BW25113_2346	mlaA	predicted lipoprotein (NCBI)	8345.01	0.507969	0.0718582	7.06904	1.56005e-12	1.03495e-11	7.0046e-09	FALSE
BW25113_1261	trpB	tryptophan synthase subunit beta (NCBI)	3025.63	0.507734	0.124313	4.0843	4.42092e-05	0.000127491	0.198499	FALSE
BW25113_3545	proK	tRNA-Pro (NCBI)	41.5827	0.507491	0.380518	1.33368	0.182307	0.253689	818.559	FALSE
BW25113_1197	treA	periplasmic trehalase (NCBI)	663.462	0.507414	0.172028	2.9496	0.00318186	0.00667684	14.2866	FALSE
BW25113_1607	ydgC	conserved inner membrane protein associated with alginate biosynthesis (NCBI)	263.985	0.506571	0.17414	2.90898	0.00362605	0.0075278	16.281	FALSE
BW25113_4062	soxS	DNA-binding transcriptional dual regulator (NCBI)	481.29	0.50653	0.147594	3.43192	0.000599333	0.00143137	2.69101	FALSE
BW25113_0977	hyaF	protein involved in nickel incorporation into hydrogenase-1 proteins (NCBI)	61.9477	0.506477	0.224351	2.25752	0.0239757	0.0418406	107.651	FALSE
BW25113_3475	acpT	holo-(acyl carrier protein) synthase 2 (NCBI)	1427.57	0.50506	0.163515	3.08877	0.0020099	0.00437971	9.02443	FALSE
BW25113_1385	feaB	phenylacetaldehyde dehydrogenase (VIMSS)	483.764	0.504985	0.209524	2.41015	0.0159459	0.0291929	71.5973	FALSE
BW25113_1876	argS		16191.5	0.504401	0.131181	3.84507	0.000120519	0.00032363	0.541131	FALSE
BW25113_1874	cutC	copper homeostasis protein (NCBI)	1780.1	0.504008	0.0951755	5.29556	1.18651e-07	4.79964e-07	0.000532744	FALSE
BW25113_1207	prs		34639.8	0.503039	0.113285	4.44046	8.97676e-06	2.82289e-05	0.0403056	FALSE
BW25113_0397	sbcC	exonuclease, dsDNA, ATP-dependent (NCBI)	3959.18	0.501174	0.0628505	7.97406	1.53539e-15	1.22558e-14	6.89391e-12	FALSE
BW25113_1064	grxB	glutaredoxin 2 (Grx2) (NCBI)	2161.92	0.500685	0.138758	3.60834	0.000308163	0.000770494	1.38365	FALSE
BW25113_1645	ydhK	conserved inner membrane protein (NCBI)	788.385	0.500289	0.149058	3.35633	0.000789838	0.00185275	3.54637	FALSE
BW25113_1698	ydiR	predicted electron transfer flavoprotein, FAD-binding (NCBI)	80.4179	0.49996	0.276791	1.80627	0.070876	0.110464	318.233	FALSE
BW25113_1499	ydeO		13.1094	0.499569	0.544067	0.918212	0.358508	0.446813	1609.7	FALSE
BW25113_0813	rhtA	threonine and homoserine efflux system (NCBI)	894.828	0.499198	0.10503	4.7529	2.00522e-06	6.89132e-06	0.00900346	FALSE
BW25113_0509	glxR	tartronate semialdehyde reductase, NADH-dependent (NCBI)	84.1816	0.498124	0.288241	1.72815	0.0839612	0.12801	376.986	FALSE
BW25113_4310	nanM	orf, hypothetical protein (VIMSS)	276.134	0.498094	0.137511	3.62221	0.000292095	0.000732701	1.3115	FALSE
BW25113_3481	nikR	nickel responsive regulator (NCBI)	533.86	0.497522	0.114828	4.33275	1.47261e-05	4.51358e-05	0.0661201	FALSE
BW25113_1024	pgaA	predicted outer membrane protein (NCBI)	445.657	0.497124	0.129382	3.8423	0.000121886	0.000326635	0.54727	FALSE
BW25113_2698	recX	RecA regulator RecX (NCBI)	390.31	0.496851	0.12664	3.92333	8.73336e-05	0.000239632	0.392128	FALSE
BW25113_1563	relE	Qin prophage; toxin of the RelE-RelB toxin-antitoxin system (NCBI)	1507.35	0.495597	0.0920623	5.38328	7.31391e-08	3.0552e-07	0.000328395	FALSE
BW25113_3350	kefB	glutathione-regulated potassium-efflux system protein (NCBI)	1576.46	0.495212	0.12869	3.8481	0.000119037	0.00032034	0.534475	FALSE
BW25113_1137	ymfD		338.269	0.493888	0.292587	1.688	0.0914106	0.138103	410.434	FALSE
BW25113_3662	nepI	predicted transporter (RefSeq)	563.697	0.493029	0.156937	3.14157	0.00168044	0.00371055	7.54516	FALSE
BW25113_3962	sthA	putative oxidoreductase (VIMSS)	15939.8	0.492885	0.247642	1.99031	0.0465566	0.0761155	209.039	FALSE
BW25113_2514	hisS		24119.7	0.492881	0.100099	4.92395	8.48138e-07	3.05302e-06	0.00380814	FALSE
BW25113_1727	yniC	predicted hydrolase (NCBI)	2575.3	0.491982	0.110398	4.45644	8.33324e-06	2.63533e-05	0.0374163	FALSE
BW25113_0916	ycaQ	hypothetical protein (NCBI)	989.548	0.491882	0.0891991	5.51443	3.49908e-08	1.50663e-07	0.000157109	FALSE
BW25113_1846	yebE	hypothetical protein (NCBI)	778.772	0.491491	0.149912	3.27853	0.00104348	0.00238891	4.68522	FALSE
BW25113_2045	wcaK	predicted pyruvyl transferase (NCBI)	428.417	0.491069	0.198904	2.46887	0.0135541	0.0252687	60.858	FALSE
BW25113_1337	abgB	predicted peptidase, aminobenzoyl-glutamate utilization protein (NCBI)	221.092	0.490884	0.189352	2.59244	0.00952975	0.0182368	42.7886	FALSE
BW25113_3423	glpR	DNA-binding transcriptional repressor (NCBI)	3373.06	0.488505	0.178286	2.74001	0.00614372	0.0122219	27.5853	FALSE
BW25113_3819	rarD	predicted chloramphenical resistance permease (NCBI)	1336.93	0.488269	0.165035	2.95857	0.00309066	0.0065007	13.8771	FALSE
BW25113_2269	elaD		106.381	0.488059	0.265942	1.83521	0.0664746	0.104447	298.471	FALSE
BW25113_2975	glcA	glycolate transporter (NCBI)	146.739	0.486184	0.185989	2.61404	0.00894785	0.0172189	40.1758	FALSE
BW25113_4132	cadB	predicted lysine/cadaverine transporter (NCBI)	538.956	0.486151	0.419091	1.16001	0.246043	0.326163	1104.73	FALSE
BW25113_0772	ybhC	predicted pectinesterase (NCBI)	10642.1	0.485761	0.120936	4.01669	5.90201e-05	0.000166746	0.265	FALSE
BW25113_0587	fepE	regulator of length of O-antigen component of lipopolysaccharide chains (NCBI)	136.451	0.484411	0.295434	1.63966	0.101076	0.151075	453.833	FALSE
BW25113_1686	menI	hypothetical protein (NCBI)	596.433	0.484324	0.107824	4.49179	7.06286e-06	2.25427e-05	0.0317122	FALSE
BW25113_3150	yraP	hypothetical protein (NCBI)	3882.65	0.48305	0.137579	3.51107	0.000446308	0.00108618	2.00392	FALSE
BW25113_1875	yecM	orf, hypothetical protein (VIMSS)	1516.82	0.482377	0.0916595	5.26271	1.41948e-07	5.71108e-07	0.000637346	FALSE
BW25113_1982	amn	AMP nucleosidase (NCBI)	4579.64	0.482258	0.123691	3.89888	9.6637e-05	0.000263545	0.4339	FALSE
BW25113_3153	yhbO	orf, hypothetical protein (VIMSS)	191.616	0.481898	0.191472	2.51681	0.0118421	0.0222811	53.1712	FALSE
BW25113_1595	ynfL	predicted DNA-binding transcriptional regulator (NCBI)	269.161	0.481442	0.122817	3.91998	8.85555e-05	0.000242836	0.397614	FALSE
BW25113_2664	csiR	putative transcriptional regulator (VIMSS)	535.865	0.479753	0.138088	3.47425	0.000512277	0.00123731	2.30012	FALSE
BW25113_1870	cmoA		2679.64	0.479642	0.141404	3.39199	0.000693877	0.00164054	3.11551	FALSE
BW25113_0123	cueO	multicopper oxidase (laccase) (NCBI)	1680.49	0.477895	0.146602	3.25981	0.00111486	0.00253161	5.00571	FALSE
BW25113_1163	bluF	predicted FAD-binding phosphodiesterase (NCBI)	1438.84	0.477691	0.398575	1.1985	0.230723	0.309428	1035.95	FALSE
BW25113_1280	yciM		3909.77	0.477549	0.0999483	4.77796	1.77086e-06	6.12347e-06	0.00795115	FALSE
BW25113_0964	yccT	hypothetical protein (NCBI)	97.5285	0.476692	0.294026	1.62126	0.104962	0.156411	471.278	FALSE
BW25113_0224	yafK	hypothetical protein (NCBI)	3414.72	0.476461	0.188429	2.5286	0.0114519	0.0216104	51.419	FALSE
BW25113_1850	eda	keto-hydroxyglutarate-aldolase/keto-deoxy- phosphogluconate aldolase (NCBI)	7997.44	0.476065	0.0890903	5.34362	9.11093e-08	3.74988e-07	0.000409081	FALSE
BW25113_2618	ratB	orf, hypothetical protein (VIMSS)	1592.69	0.475955	0.101195	4.70335	2.55926e-06	8.64933e-06	0.0114911	FALSE
BW25113_3204	ptsN	sugar-specific enzyme IIA component of PTS (NCBI)	5297	0.474619	0.100278	4.73302	2.21206e-06	7.55575e-06	0.00993214	FALSE
BW25113_3935	priA	primosome assembly protein PriA (NCBI)	2460.83	0.474348	0.106348	4.46032	8.18378e-06	2.59172e-05	0.0367452	FALSE
BW25113_2572	rseA	anti-sigma factor (NCBI)	15093.9	0.474257	0.207168	2.28924	0.0220656	0.0389629	99.0747	FALSE
BW25113_4371	rsmC	16S ribosomal RNA m2G1207 methyltransferase (NCBI)	5261.42	0.473867	0.163416	2.89976	0.0037345	0.00773143	16.7679	FALSE
BW25113_0961	yccF	conserved inner membrane protein (NCBI)	1244.75	0.4736	0.0913021	5.18718	2.13507e-07	8.33554e-07	0.000958649	FALSE
BW25113_0396	araJ	involved in either transport or processing of arabinose polymers (VIMSS)	648.482	0.473534	0.135957	3.48297	0.000495888	0.00120097	2.22654	FALSE
BW25113_0674	asnB	asparagine synthetase B (NCBI)	5164.96	0.472423	0.144688	3.26512	0.00109418	0.00248843	4.91286	FALSE
BW25113_3385	gph	phosphoglycolate phosphatase (NCBI)	7000.06	0.471449	0.0635846	7.41452	1.2207e-13	8.69047e-13	5.48096e-10	FALSE
BW25113_1805	fadD	acyl-CoA synthase (NCBI)	5229.29	0.471334	0.185225	2.54465	0.0109386	0.0207116	49.1143	FALSE
BW25113_0392	ykiA	hypothetical protein (NCBI)	363.544	0.471131	0.160083	2.94305	0.00324999	0.00681341	14.5924	FALSE
BW25113_2886	ygfS	putative oxidoreductase, Fe-S subunit (VIMSS)	7.20164	0.469357	0.679557	0.690681	0.489766	0.575485	2199.05	FALSE
BW25113_1861	ruvA		2382.35	0.46908	0.0843531	5.5609	2.68384e-08	1.17023e-07	0.000120504	FALSE
BW25113_0909	ycaL	putative heat shock protein (VIMSS)	213.999	0.468554	0.154672	3.02934	0.00245091	0.00526388	11.0046	FALSE
BW25113_4483	tatD	DNase, magnesium-dependent (NCBI)	1498.16	0.467648	0.14364	3.25569	0.00113118	0.00256607	5.07899	FALSE
BW25113_0417	thiL		3565.46	0.46742	0.16258	2.87501	0.00404016	0.0082838	18.1403	FALSE
BW25113_3510	hdeA	acid-resistance protein, possible chaperone , subunit of HdeA dimer, inactive form of acid-resistance protein (Katherine Huang)	523.059	0.466704	0.0898942	5.1917	2.08378e-07	8.16374e-07	0.000935616	FALSE
BW25113_4241	treR	trehalose repressor (NCBI)	894.32	0.465404	0.12467	3.73308	0.000189152	0.000491599	0.849294	FALSE
BW25113_0978	cbdA	cytochrome bd-II oxidase, subunit I (NCBI)	158.394	0.46505	0.198663	2.3409	0.0192375	0.0344306	86.3762	FALSE
BW25113_4655	ythA	expressed protein (RefSeq)	15.2699	0.465033	0.565972	0.821653	0.411274	0.498832	1846.62	FALSE
BW25113_1562	hokD	Qin prophage; small toxic polypeptide (NCBI)	583.044	0.464779	0.0965794	4.8124	1.49129e-06	5.19687e-06	0.00669587	FALSE
BW25113_1664	ydhQ	hypothetical protein (NCBI)	8674.1	0.4633	0.100847	4.59411	4.34596e-06	1.42992e-05	0.0195134	FALSE
BW25113_1641	slyB		47614.4	0.462564	0.0835236	5.53812	3.05729e-08	1.32532e-07	0.000137272	FALSE
BW25113_0802	ybiJ	hypothetical protein (NCBI)	258.421	0.462276	0.223541	2.06797	0.0386431	0.0644484	173.508	FALSE
BW25113_3908	sodA	superoxide dismutase, manganese (VIMSS)	52269.3	0.462262	0.0894017	5.17062	2.33312e-07	9.08498e-07	0.00104757	FALSE
BW25113_1210	hemA		5230.97	0.46194	0.100957	4.57563	4.748e-06	1.55421e-05	0.0213185	FALSE
BW25113_3002	yqhA	hypothetical protein (NCBI)	4198.35	0.461761	0.103704	4.45266	8.48126e-06	2.67836e-05	0.0380809	FALSE
BW25113_2436	hemF	coproporphyrinogen III oxidase (NCBI)	1558.69	0.461701	0.087623	5.26917	1.37038e-07	5.5185e-07	0.000615302	FALSE
BW25113_4689	rzoQ		4.9866	0.461576	1.21772	0.37905	0.704651	0.76588	3163.88	FALSE
BW25113_1699	ydiS	predicted oxidoreductase with FAD/NAD(P)-binding domain (NCBI)	89.1631	0.461402	0.237499	1.94275	0.0520462	0.0842295	233.688	FALSE
BW25113_4620	yjbT	hypothetical protein, no homologs (RefSeq)	45.5738	0.461368	0.297831	1.54909	0.12136	0.177193	544.906	FALSE
BW25113_4502	yeiW	hypothetical protein (NCBI)	262.533	0.459511	0.179883	2.5545	0.0106342	0.0201693	47.7473	FALSE
BW25113_2182	bcr	bicyclomycin/multidrug efflux system (NCBI)	2908.08	0.459105	0.132467	3.46579	0.00052867	0.00127394	2.37373	FALSE
BW25113_4551	yheV	hypothetical protein (NCBI)	630.792	0.458519	0.0983674	4.66128	3.14244e-06	1.05092e-05	0.0141096	FALSE
BW25113_1234	rssA	conserved protein (RefSeq)	2618.41	0.457822	0.093685	4.88682	1.02477e-06	3.6449e-06	0.00460123	FALSE
BW25113_3539	yhjV	predicted transporter (NCBI)	1654.19	0.457411	0.180531	2.5337	0.0112864	0.0213252	50.676	FALSE
BW25113_4354	yjiY	putative carbon starvation protein (VIMSS)	45199.8	0.456798	0.543482	0.840502	0.400627	0.487634	1798.81	FALSE
BW25113_0619	citA	sensory histidine kinase in two-component regulatory system with citB (NCBI)	670.033	0.456353	0.137895	3.30943	0.000934862	0.00215567	4.19753	FALSE
BW25113_4653	yicT		17.9901	0.455327	0.379498	1.19981	0.230212	0.308835	1033.65	FALSE
BW25113_2179	yejE	predicted oligopeptide transporter subunit (NCBI)	600.648	0.45531	0.128049	3.55575	0.000376896	0.000929372	1.69226	FALSE
BW25113_1154	stfP	e14 prophage; predicted protein (NCBI)	18.159	0.455304	0.486334	0.936196	0.349172	0.437247	1567.78	FALSE
BW25113_3639	dfp		7423.22	0.455269	0.0586569	7.76156	8.38918e-15	6.44369e-14	3.76674e-11	FALSE
BW25113_1992	cobS	cobalamin synthase (NCBI)	778.208	0.454999	0.150604	3.02117	0.00251802	0.00540024	11.3059	FALSE
BW25113_4027	yjbF	orf, hypothetical protein (VIMSS)	114.157	0.452921	0.264223	1.71416	0.0864991	0.131436	388.381	FALSE
BW25113_4577	sgrS	small antisense RNA (NCBI)	17.3962	0.451793	0.383587	1.17781	0.238872	0.318164	1072.53	FALSE
BW25113_0543	emrE	multidrug efflux protein (NCBI)	509.924	0.451156	0.115675	3.9002	9.61132e-05	0.000262276	0.431548	FALSE
BW25113_1576	ydfD		5.65697	0.45088	0.780774	0.577478	0.563617	0.644504	2530.64	FALSE
BW25113_4490	efeU		2563.43	0.45038	0.197514	2.28024	0.0225937	0.0397855	101.446	FALSE
BW25113_1473	yddG	predicted methyl viologen efflux pump (RefSeq)	563.23	0.448893	0.129633	3.46279	0.000534611	0.0012864	2.4004	FALSE
BW25113_3484	yhhI	predicted transposase (NCBI)	105.784	0.448564	0.255756	1.75388	0.0794519	0.121886	356.739	FALSE
BW25113_2765	queD	6-pyruvoyl tetrahydrobiopterin synthase (PTPS) (NCBI)	1822.34	0.448331	0.185127	2.42176	0.0154457	0.0284166	69.3514	FALSE
BW25113_2358	oweS	CPS-53 (KpLE1) prophage; predicted defective phage replication protein O (RefSeq)	10.39	0.448261	0.859958	0.521258	0.602187	0.679585	2703.82	FALSE
BW25113_1768	pncA	orf, hypothetical protein (VIMSS)	4122.05	0.448142	0.0741566	6.04319	1.511e-09	7.50141e-09	6.7844e-06	FALSE
BW25113_2517	rlmN	predicted enzyme (NCBI)	15260.8	0.447783	0.19146	2.33879	0.0193465	0.0346119	86.8659	FALSE
BW25113_2408	yfeN	conserved outer membrane protein (NCBI)	93.1386	0.447718	0.265411	1.68688	0.0916256	0.138288	411.399	FALSE
BW25113_2685	emrA	multidrug efflux system (NCBI)	3578.56	0.447588	0.118949	3.76286	0.000167984	0.00044286	0.754249	FALSE
BW25113_2708	srlQ	orf, hypothetical protein (VIMSS)	3116.61	0.447523	0.133784	3.34513	0.000822445	0.00192219	3.69278	FALSE
BW25113_2818	argA	N-acetylglutamate synthase (NCBI)	574.161	0.44676	0.147791	3.02291	0.00250355	0.00537178	11.241	FALSE
BW25113_3292	zntR	zinc-responsive transcriptional regulator (NCBI)	858.41	0.443718	0.131246	3.38081	0.000722714	0.00170243	3.24499	FALSE
BW25113_0506	allR	DNA-binding transcriptional repressor (NCBI)	4610.63	0.442416	0.117908	3.7522	0.000175288	0.000459029	0.787042	FALSE
BW25113_4384	deoD	purine nucleoside phosphorylase (NCBI)	35656.2	0.442165	0.101731	4.34643	1.3837e-05	4.25564e-05	0.0621281	FALSE
BW25113_4168	tsaE		1309.28	0.442087	0.099269	4.45342	8.45128e-06	2.67077e-05	0.0379463	FALSE
BW25113_3483	yhhH		35.874	0.441459	0.294507	1.49898	0.133879	0.193453	601.118	FALSE
BW25113_3034	nudF	ADP-ribose pyrophosphatase (NCBI)	2343.11	0.441122	0.0782403	5.63804	1.71996e-08	7.69778e-08	7.72264e-05	FALSE
BW25113_3741	mnmG	glucose-inhibited division protein A (NCBI)	13981.5	0.441055	0.194455	2.26816	0.0233196	0.040839	104.705	FALSE
BW25113_4286	yjhV	KpLE2 phage-like element; predicted protein (RefSeq)	132.168	0.440918	0.245822	1.79365	0.0728695	0.113066	327.184	FALSE
BW25113_4654	yjdQ		8.95009	0.440758	0.723898	0.608868	0.542612	0.625605	2436.33	FALSE
BW25113_3172	argG	argininosuccinate synthase (NCBI)	2210.24	0.440145	0.096945	4.54015	5.6215e-06	1.8215e-05	0.0252405	FALSE
BW25113_0691	ybfG	orf, hypothetical protein (VIMSS)	74.4172	0.439682	0.256299	1.71551	0.0862525	0.131106	387.274	FALSE
BW25113_3702	dnaA		11802.7	0.438618	0.169813	2.58295	0.00979597	0.0186824	43.9839	FALSE
BW25113_0646	djlB	predicted chaperone (NCBI)	70.4813	0.43823	0.759999	0.576619	0.564197	0.644827	2533.24	FALSE
BW25113_3199	lptC	hypothetical protein (NCBI)	4474.6	0.437387	0.0807707	5.41517	6.12315e-08	2.57702e-07	0.000274929	FALSE
BW25113_0404	acpH	hypothetical protein (NCBI)	521.953	0.436606	0.157947	2.76425	0.00570537	0.0114056	25.6171	FALSE
BW25113_3063	ttdT	predicted tartrate:succinate antiporter (NCBI)	415.495	0.435545	0.200862	2.16838	0.03013	0.0514436	135.284	FALSE
BW25113_3148	yraN	hypothetical protein (NCBI)	1147.9	0.435341	0.0804263	5.41292	6.20053e-08	2.60713e-07	0.000278404	FALSE
BW25113_1549	ydfO		53.6603	0.434497	0.402728	1.07888	0.280639	0.364579	1260.07	FALSE
BW25113_0507	gcl	glyoxylate carboligase (NCBI)	185.302	0.433875	0.149167	2.90865	0.00362995	0.0075324	16.2985	FALSE
BW25113_1292	sapC	predicted antimicrobial peptide transporter subunit (NCBI)	1075.95	0.433104	0.0802446	5.3973	6.76526e-08	2.83394e-07	0.00030376	FALSE
BW25113_2988	gss	fused glutathionylspermidine amidase/glutathionylspermidine synthetase (NCBI)	4575.33	0.433024	0.108343	3.99678	6.42091e-05	0.000180722	0.288299	FALSE
BW25113_1373	tfaR		60.4625	0.43278	0.244154	1.77257	0.0762997	0.117777	342.586	FALSE
BW25113_2368	emrK	EmrKY-TolC multidrug resistance efflux pump, membrane fusion protein component (NCBI)	59.3929	0.432447	0.363646	1.1892	0.234361	0.313152	1052.28	FALSE
BW25113_1774	ydjJ	predicted oxidoreductase, Zn-dependent and NAD(P)-binding (NCBI)	180.301	0.431377	0.233792	1.84513	0.0650189	0.102664	291.935	FALSE
BW25113_1706	ydiU	hypothetical protein (NCBI)	4842.28	0.430943	0.0642028	6.71221	1.91702e-11	1.14919e-10	8.60744e-08	FALSE
BW25113_0113	pdhR	transcriptional regulator of pyruvate dehydrogenase complex (NCBI)	14636.6	0.430941	0.332675	1.29538	0.195189	0.26861	876.399	FALSE
BW25113_1414	ydcF	hypothetical protein (NCBI)	1295.58	0.430452	0.1088	3.95637	7.60981e-05	0.00021048	0.341681	FALSE
BW25113_2569	lepA	GTP-binding protein LepA (NCBI)	34777.2	0.430027	0.145266	2.96028	0.0030736	0.00647089	13.8005	FALSE
BW25113_0870	ltaE	L-allo-threonine aldolase, PLP-dependent (NCBI)	3363.99	0.429139	0.127979	3.3532	0.000798839	0.0018719	3.58679	FALSE
BW25113_1307	pspD	peripheral inner membrane phage-shock protein (NCBI)	251.943	0.429001	0.162956	2.63262	0.00847283	0.0163964	38.043	FALSE
BW25113_1184	umuC	DNA polymerase V subunit UmuC (NCBI)	287.669	0.428544	0.139781	3.06581	0.0021708	0.00470059	9.74687	FALSE
BW25113_0670	glnU		8941.44	0.428536	0.228531	1.87517	0.0607689	0.0966689	272.852	FALSE
BW25113_0070	setA	broad specificity sugar efflux system (NCBI)	1086.73	0.42787	0.12541	3.41178	0.000645407	0.00153485	2.89788	FALSE
BW25113_0912	ihfB	integration host factor subunit beta (NCBI)	10336.9	0.426064	0.0663941	6.4172	1.38807e-10	7.6738e-10	6.23243e-07	FALSE
BW25113_0377	sbmA	predicted transporter (NCBI)	1101.09	0.425906	0.112206	3.79576	0.000147194	0.000390715	0.660902	FALSE
BW25113_2118	yehI	hypothetical protein (NCBI)	343.768	0.425526	1.22603	0.347075	0.728535	0.787824	3271.12	FALSE
BW25113_4460	araH	fused L-arabinose transporter subunits of ABC superfamily: membrane components (RefSeq)	183.894	0.425379	0.209048	2.03484	0.0418671	0.0690791	187.983	FALSE
BW25113_2082	ogrK	DNA-binding transcriptional regulator prophage P2 remnant (NCBI)	192.028	0.423457	0.137493	3.07985	0.00207103	0.00450417	9.29894	FALSE
BW25113_1725	yniA	predicted phosphotransferase/kinase (NCBI)	1615.67	0.422086	0.154982	2.72346	0.00646025	0.0127948	29.0065	FALSE
BW25113_0481	ybaK	hypothetical protein (NCBI)	1064.21	0.421562	0.0900109	4.68346	2.82079e-06	9.49021e-06	0.0126653	FALSE
BW25113_1434	ydcN	predicted DNA-binding transcriptional regulator (NCBI)	473.64	0.421547	0.116947	3.6046	0.000312634	0.000781235	1.40372	FALSE
BW25113_0739	tolA	cell envelope integrity inner membrane protein TolA (NCBI)	8618.82	0.420318	0.103716	4.05259	5.06538e-05	0.00014503	0.227435	FALSE
BW25113_1411	ynbD	predicted phosphatase, inner membrane protein (NCBI)	253.73	0.419817	0.120404	3.48674	0.000488954	0.00118546	2.1954	FALSE
BW25113_1829	htpX	heat shock protein HtpX (NCBI)	12520.8	0.419793	0.0959583	4.37474	1.21579e-05	3.77029e-05	0.0545888	FALSE
BW25113_0488	ybbJ	conserved inner membrane protein (RefSeq)	792.27	0.419494	0.133021	3.15359	0.00161277	0.0035717	7.24132	FALSE
BW25113_2183	rsuA	16S rRNA pseudouridylate 516 synthase (NCBI)	3539.46	0.418784	0.139174	3.00907	0.00262048	0.00560388	11.766	FALSE
BW25113_1604	ydgH	hypothetical protein (NCBI)	10723.6	0.418312	0.104505	4.00278	6.26014e-05	0.00017653	0.28108	FALSE
BW25113_2217	rcsB	DNA-binding response regulator in two-component regulatory system with RcsC and YojN (NCBI)	14708.5	0.418181	0.0732973	5.70528	1.16153e-08	5.3129e-08	5.21526e-05	FALSE
BW25113_4145	yjeJ	hypothetical protein (NCBI)	668.288	0.418036	0.135218	3.09157	0.00199099	0.00434274	8.93953	FALSE
BW25113_0020	nhaR	DNA-binding transcriptional activator (NCBI)	1841.24	0.417964	0.0733684	5.69679	1.22085e-08	5.57286e-08	5.48163e-05	FALSE
BW25113_2098	yegT	predicted nucleoside transporter (NCBI)	324.807	0.416221	0.23054	1.80542	0.0710089	0.11049	318.83	FALSE
BW25113_0144	gluQ	glutamyl-Q tRNA(Asp) synthetase (RefSeq)	1701.56	0.416057	0.282395	1.47332	0.140666	0.201504	631.589	FALSE
BW25113_1386	tynA	tyramine oxidase, copper-requiring (NCBI)	228.634	0.415864	0.173003	2.4038	0.0162256	0.0296443	72.8528	FALSE
BW25113_0416	nusB		14245	0.415697	0.11894	3.49501	0.000474046	0.00115056	2.12847	FALSE
BW25113_1773	ydjI	predicted aldolase (NCBI)	238.153	0.41546	0.158525	2.62079	0.0087726	0.0169108	39.389	FALSE
BW25113_1100	ycfH	predicted metallodependent hydrolase (NCBI)	3874.58	0.414994	0.139027	2.98498	0.00283594	0.00601009	12.7334	FALSE
BW25113_2221	atoD	acetyl-CoA:acetoacetyl-CoA transferase, alpha subunit (NCBI)	40.9275	0.414984	0.349057	1.18887	0.23449	0.313152	1052.86	FALSE
BW25113_3052	hldE	fused heptose 7-phosphate kinase/heptose 1-phosphate adenyltransferase (NCBI)	9696.92	0.41472	0.0618455	6.70575	2.00381e-11	1.1996e-10	8.99709e-08	FALSE
BW25113_3384	trpS		13111.1	0.414074	0.0667648	6.20198	5.57555e-10	2.88306e-09	2.50342e-06	FALSE
BW25113_2234	nrdA		24038.7	0.413853	0.134752	3.07121	0.00213194	0.0046254	9.57241	FALSE
BW25113_1211	prfA		6015.14	0.41361	0.129083	3.20422	0.00135427	0.00302767	6.08067	FALSE
BW25113_3028	mdaB	NADPH quinone reductase (NCBI)	2279.02	0.413025	0.113641	3.63448	0.000278541	0.000702895	1.25065	FALSE
BW25113_2553	glnB	regulatory protein P-II for glutamine synthetase (NCBI)	4226.39	0.412685	0.104665	3.9429	8.05012e-05	0.0002217	0.36145	FALSE
BW25113_1775	ydjK	predicted transporter (NCBI)	215.066	0.412206	0.339294	1.21489	0.224407	0.302224	1007.59	FALSE
BW25113_3848	yigZ	orf, hypothetical protein (VIMSS)	3086.21	0.411306	0.102302	4.02051	5.80725e-05	0.00016438	0.260746	FALSE
BW25113_0654	gltJ	glutamate and aspartate transporter subunit (NCBI)	836.111	0.411113	0.219555	1.87248	0.06114	0.0972248	274.519	FALSE
BW25113_3235	degS		2360.27	0.410149	0.0852254	4.81253	1.49034e-06	5.19687e-06	0.00669162	FALSE
BW25113_3398	yrfF	predicted inner membrane protein (NCBI)	5830.36	0.409631	0.157757	2.59659	0.00941543	0.0180644	42.2753	FALSE
BW25113_2700	pncC	competence damage-inducible protein A (NCBI)	2211.95	0.409586	0.113001	3.62461	0.000289393	0.000726403	1.29938	FALSE
BW25113_1570	dicA		1774.04	0.408641	0.120618	3.3879	0.000704305	0.00166431	3.16233	FALSE
BW25113_0513	ybbY	putative transport (VIMSS)	101.125	0.408405	0.22614	1.80598	0.0709211	0.110464	318.436	FALSE
BW25113_0602	ybdN	hypothetical protein (NCBI)	135.616	0.408352	0.167855	2.43276	0.0149841	0.0276601	67.2784	FALSE
BW25113_4217	ytfK	orf, hypothetical protein (VIMSS)	3334.06	0.407988	0.0970377	4.20443	2.61744e-05	7.79315e-05	0.117523	FALSE
BW25113_3509	hdeB	orf, hypothetical protein (VIMSS)	121.104	0.407923	0.215465	1.89322	0.0583282	0.0932501	261.894	FALSE
BW25113_1663	mdtK	multidrug efflux protein NorM (NCBI)	2284.43	0.407719	0.129748	3.14238	0.0016758	0.00370305	7.52433	FALSE
BW25113_1399	paaX	DNA-binding transcriptional repressor of phenylacetic acid degradation, aryl-CoA responsive (NCBI)	1345.03	0.407533	0.112235	3.63106	0.000282259	0.000711286	1.26734	FALSE
BW25113_1564	relB		1123.1	0.407134	0.0901261	4.51739	6.26072e-06	2.0126e-05	0.0281106	FALSE
BW25113_2066	udk	uridine/cytidine kinase (VIMSS)	3310.26	0.407062	0.175224	2.3231	0.020174	0.035963	90.5811	FALSE
BW25113_1692	ydiB	quinate/shikimate 5-dehydrogenase, NAD(P)-binding (NCBI)	132.109	0.406915	0.184564	2.20474	0.0274723	0.0474548	123.351	FALSE
BW25113_0668	glnW		8391.89	0.406636	0.229953	1.76834	0.0770037	0.11874	345.746	FALSE
BW25113_2314	dedD	putative lipoprotein (VIMSS)	5230.95	0.406483	0.068224	5.95806	2.55253e-09	1.24513e-08	1.14609e-05	FALSE
BW25113_3632	waaQ	lipopolysaccharide core biosynthesis protein (NCBI)	5333.29	0.40569	0.0979211	4.14303	3.42747e-05	0.000100512	0.153893	FALSE
BW25113_0706	ybfD	hypothetical protein (NCBI)	30.4047	0.405538	0.37274	1.08799	0.276598	0.359851	1241.93	FALSE
BW25113_0576	pheP	phenylalanine transporter (NCBI)	5635.13	0.405061	0.16951	2.3896	0.0168667	0.0306669	75.7315	FALSE
BW25113_0665	glnV		3373.6	0.404346	0.216546	1.86725	0.0618667	0.098206	277.782	FALSE
BW25113_1022	pgaC	predicted glycosyl transferase (NCBI)	168.398	0.403939	0.152312	2.65205	0.0080004	0.0155629	35.9218	FALSE
BW25113_2531	iscR	DNA-binding transcriptional repressor (NCBI)	8628.68	0.40358	0.148467	2.71831	0.00656153	0.0129724	29.4613	FALSE
BW25113_3680	yidL	predicted DNA-binding transcriptional regulator (RefSeq)	293.028	0.403211	0.276463	1.45846	0.144714	0.206313	649.764	FALSE
BW25113_0240	crl	DNA-binding transcriptional regulator (NCBI)	9847.15	0.402607	0.167115	2.40917	0.015989	0.0292598	71.7905	FALSE
BW25113_1255	yciC	hypothetical protein (NCBI)	3200.79	0.401231	0.111672	3.59294	0.000326974	0.000814796	1.46811	FALSE
BW25113_1343	dbpA	ATP-dependent RNA helicase, specific for 23S rRNA (NCBI)	2381.28	0.401189	0.174493	2.29917	0.0214951	0.0380907	96.5132	FALSE
BW25113_3351	kefG	glutathione-regulated potassium-efflux system ancillary protein (NCBI)	760.015	0.400808	0.162662	2.46405	0.0137376	0.0255788	61.6818	FALSE
BW25113_1571	ydfA		37.4743	0.400566	0.305557	1.31094	0.189879	0.262431	852.556	FALSE
BW25113_1932	yedL	predicted acyltransferase (NCBI)	58.4751	0.399703	0.396011	1.00932	0.31282	0.400024	1404.56	FALSE
BW25113_1353	sieB	phage superinfection exclusion protein (VIMSS)	28.793	0.399578	0.356973	1.11935	0.262991	0.345358	1180.83	FALSE
BW25113_1216	chaA	calcium/sodium:proton antiporter (NCBI)	5676.37	0.399266	0.0926732	4.30832	1.64497e-05	5.01442e-05	0.0738592	FALSE
BW25113_0979	cbdB	cytochrome bd-II oxidase, subunit II (NCBI)	177.777	0.399121	0.173875	2.29545	0.0217073	0.0384059	97.4659	FALSE
BW25113_1096	pabC	4-amino-4-deoxychorismate lyase (NCBI)	1423.69	0.397765	0.10893	3.65155	0.000260664	0.00066021	1.17038	FALSE
BW25113_0427	yajR	putative transport protein (VIMSS)	1687.16	0.396419	0.152859	2.59336	0.00950433	0.0182038	42.6744	FALSE
BW25113_1148	ymfM	e14 prophage; predicted protein (NCBI)	27.7635	0.396168	0.314385	1.26014	0.20762	0.283107	932.214	FALSE
BW25113_0658	ybeX		15026.7	0.395541	0.0799937	4.94465	7.62805e-07	2.77035e-06	0.00342499	FALSE
BW25113_0815	ybiP	predicted hydrolase, inner membrane (NCBI)	1574.44	0.395063	0.215151	1.83622	0.0663254	0.104353	297.801	FALSE
BW25113_2502	ppx	exopolyphosphatase (NCBI)	4156.95	0.39393	0.0960072	4.10313	4.07598e-05	0.000118598	0.183011	FALSE
BW25113_1856	mepM	orf, hypothetical protein (VIMSS)	7021.61	0.393707	0.167343	2.35269	0.0186381	0.0334649	83.6852	FALSE
BW25113_2780	pyrG		48543.2	0.393675	0.0786627	5.0046	5.59771e-07	2.07505e-06	0.00251337	FALSE
BW25113_4197	ulaE	L-xylulose 5-phosphate 3-epimerase (NCBI)	308.469	0.393117	0.926193	0.424444	0.671242	0.73944	3013.88	FALSE
BW25113_3064	tsaD		4296.72	0.392295	0.137352	2.85614	0.00428826	0.00876441	19.2543	FALSE
BW25113_0232	yafN		352.579	0.392291	0.126157	3.10955	0.00187371	0.00411499	8.41296	FALSE
BW25113_2488	hyfH	hydrogenase 4, Fe-S subunit (NCBI)	72.6823	0.392184	0.249886	1.56945	0.116543	0.171164	523.278	FALSE
BW25113_2052	wcaG	bifunctional GDP-fucose synthetase: GDP-4-dehydro-6-deoxy-D-mannose epimerase/ GDP-4-dehydro-6-L-deoxygalactose reductase (NCBI)	1167.89	0.391783	0.152806	2.56392	0.0103498	0.0196466	46.4706	FALSE
BW25113_0293	ecpA	hypothetical protein (NCBI)	383.493	0.389439	0.125839	3.09474	0.00196984	0.00429893	8.84458	FALSE
BW25113_4573	insZ		325.412	0.388816	0.204466	1.90162	0.0572214	0.0916443	256.924	FALSE
BW25113_2787	gudD	(D)-glucarate dehydratase 1 (NCBI)	353.323	0.388301	0.140624	2.76127	0.00575776	0.0115052	25.8523	FALSE
BW25113_2718	hycH	protein required for maturation of hydrogenase 3 (NCBI)	148.557	0.38745	0.184563	2.09928	0.0357924	0.0601871	160.708	FALSE
BW25113_0288	ykgJ	predicted ferredoxin (NCBI)	109.099	0.387418	0.266265	1.45501	0.145668	0.20754	654.047	FALSE
BW25113_3386	rpe		6352.26	0.3866	0.0814452	4.74674	2.06718e-06	7.07709e-06	0.00928164	FALSE
BW25113_3221	yhcH	hypothetical protein (NCBI)	986.176	0.385943	0.31836	1.21229	0.225403	0.303292	1012.06	FALSE
BW25113_3939	metB	cystathionine gamma-synthase (NCBI)	1673.59	0.384663	0.0845678	4.54857	5.40104e-06	1.75514e-05	0.0242507	FALSE
BW25113_1289	ycjD	hypothetical protein (NCBI)	165.045	0.384289	0.159283	2.41263	0.015838	0.029019	71.1125	FALSE
BW25113_3197	kdsD	D-arabinose 5-phosphate isomerase (NCBI)	4710.69	0.384172	0.0811768	4.73254	2.21728e-06	7.56784e-06	0.00995561	FALSE
BW25113_3209	elbB	sigma cross-reacting protein 27A (SCRP-27A) (VIMSS)	2259.71	0.384085	0.102317	3.75387	0.000174125	0.000456688	0.781823	FALSE
BW25113_2725	hycA	regulator of the transcriptional regulator FhlA (NCBI)	16.1515	0.383774	0.43503	0.882178	0.37768	0.46591	1695.78	FALSE
BW25113_3867	hemN	O2-independent coproporphyrinogen III oxidase (VIMSS)	5648.97	0.3831	0.0651669	5.87874	4.13393e-09	1.97564e-08	1.85614e-05	FALSE
BW25113_0511	ybbW	putative transport protein (VIMSS)	37.4424	0.381863	0.402121	0.94962	0.342305	0.430211	1536.95	FALSE
BW25113_1208	ispE		9117.48	0.381291	0.0947053	4.02608	5.67141e-05	0.000160942	0.254646	FALSE
BW25113_3915	fieF	ferrous iron efflux protein F (NCBI)	3660.59	0.381032	0.0767797	4.96267	6.953e-07	2.5396e-06	0.0031219	FALSE
BW25113_1238	tdk	thymidine kinase (NCBI)	2198.2	0.380859	0.131691	2.89207	0.00382712	0.00789763	17.1838	FALSE
BW25113_3465	rsmD	predicted methyltransferase (NCBI)	1749.39	0.380637	0.100504	3.78728	0.000152306	0.000404043	0.683852	FALSE
BW25113_0958	sulA	SOS cell division inhibitor (NCBI)	1260.41	0.380575	0.0606989	6.26988	3.61327e-10	1.89242e-09	1.62236e-06	FALSE
BW25113_0879	macB	fused macrolide transporter subunits of ABC superfamily: ATP-binding component/membrane component (NCBI)	1750.17	0.379414	0.104512	3.63032	0.000283065	0.000712916	1.27096	FALSE
BW25113_0466	ybaM		258.729	0.379067	0.128402	2.9522	0.00315521	0.00663334	14.1669	FALSE
BW25113_1435	ydcP	putative collagenase (VIMSS)	5100.91	0.378737	0.126865	2.98535	0.00283255	0.0060086	12.7181	FALSE
BW25113_3506	slp	outer membrane protein induced after carbon starvation (VIMSS)	126.174	0.378546	0.236858	1.5982	0.109999	0.162541	493.894	FALSE
BW25113_1023	pgaB	predicted enzyme associated with biofilm formation (NCBI)	222.958	0.378421	0.130577	2.89808	0.0037546	0.00776271	16.8582	FALSE
BW25113_0467	priC	primosomal replication protein N'' (NCBI)	587.752	0.378014	0.138408	2.73116	0.0063112	0.012544	28.3373	FALSE
BW25113_4526	ydaE		2.40013	0.378004	1.32641	0.284982	0.775658	0.825819	3482.7	FALSE
BW25113_0842	mdfA	multidrug efflux system protein (NCBI)	2851.16	0.37738	0.206473	1.82774	0.0675879	0.105899	303.469	FALSE
BW25113_3194	mlaE	predicted toluene transporter subunit: membrane component of ABC superfamily (NCBI)	9342.94	0.376599	0.0798094	4.71874	2.37315e-06	8.06908e-06	0.0106555	FALSE
BW25113_1825	yebO		5904.84	0.37512	0.119479	3.13962	0.00169165	0.00373346	7.5955	FALSE
BW25113_2626	yfjJ	CP4-57 prophage; predicted protein (NCBI)	41.2037	0.375017	0.343057	1.09316	0.274323	0.357827	1231.71	FALSE
BW25113_1653	lhr	predicted ATP-dependent helicase (NCBI)	2230.5	0.374846	0.082647	4.5355	5.74664e-06	1.85801e-05	0.0258024	FALSE
BW25113_2724	hycB	hydrogenase 3, Fe-S subunit (NCBI)	15.3519	0.374268	0.798509	0.468709	0.639278	0.710929	2870.36	FALSE
BW25113_4360	yjjA	putative glycoprotein/receptor (VIMSS)	1801.63	0.374113	0.138856	2.69425	0.00705481	0.0138802	31.6761	FALSE
BW25113_1782	mipA	scaffolding protein for murein synthesizing machinery (NCBI)	17146.5	0.373664	0.0958049	3.90026	9.60881e-05	0.000262276	0.431436	FALSE
BW25113_1756	ynjD	predicted transporter subunit: ATP-binding component of ABC superfamily (NCBI)	257.55	0.373288	0.156167	2.39032	0.0168339	0.0306307	75.584	FALSE
BW25113_2513	yfgM	hypothetical protein (NCBI)	12799.6	0.372346	0.0992026	3.75339	0.000174459	0.000457126	0.783322	FALSE
BW25113_0515	allE	hypothetical protein (NCBI)	573.836	0.372241	0.0987517	3.76947	0.000163597	0.00043246	0.73455	FALSE
BW25113_2390	ypeC	hypothetical protein (NCBI)	1010.5	0.371467	0.125306	2.96448	0.00303191	0.0064006	13.6133	FALSE
BW25113_1582	ynfA	hypothetical protein (NCBI)	196.371	0.370302	0.143358	2.58305	0.00979304	0.0186824	43.9708	FALSE
BW25113_4712	agrA		75.7462	0.37019	0.279217	1.32581	0.184901	0.25698	830.207	FALSE
BW25113_0644	ybeQ	orf, hypothetical protein (VIMSS)	294.638	0.370103	0.163577	2.26256	0.0236626	0.0413749	106.245	FALSE
BW25113_0939	elfD	predicted periplasmic pilin chaperone (NCBI)	47.4128	0.370053	0.345095	1.07232	0.283576	0.367328	1273.26	FALSE
BW25113_1838	pphA	protein phosphatase 1 modulates phosphoproteins, signals protein misfolding (VIMSS)	179.363	0.37001	0.184483	2.00566	0.044893	0.0736377	201.57	FALSE
BW25113_2389	yfeO	hypothetical protein (NCBI)	1116.3	0.369912	0.101156	3.65683	0.000255349	0.00064841	1.14652	FALSE
BW25113_2541	hcaB	2,3-dihydroxy-2,3-dihydrophenylpropionate dehydrogenase (NCBI)	122.983	0.369695	0.180354	2.04983	0.0403809	0.0669972	181.31	FALSE
BW25113_1977	asnT	tRNA-Asn (NCBI)	97.3104	0.369596	0.209627	1.76311	0.0778814	0.119846	349.688	FALSE
BW25113_1272	sohB	predicted inner membrane peptidase (NCBI)	6849.72	0.36939	0.102948	3.58813	0.000333056	0.000827649	1.49542	FALSE
BW25113_3740	rsmG	glucose-inhibited division protein B (NCBI)	2043.01	0.36916	0.16901	2.18425	0.0289441	0.049755	129.959	FALSE
BW25113_2180	yejF	fused predicted oligopeptide transporter subunits of ABC superfamilly: ATP-binding components (NCBI)	2073.72	0.369034	0.0955502	3.86219	0.000112373	0.000303686	0.504556	FALSE
BW25113_3996	nudC	NADH pyrophosphatase (NCBI)	2297.1	0.368524	0.0986925	3.73406	0.000188414	0.000490534	0.845979	FALSE
BW25113_1644	ydhJ	putative membrane protein (VIMSS)	10.3889	0.367828	0.492777	0.746438	0.455403	0.543109	2044.76	FALSE
BW25113_1614	ydgA	hypothetical protein (NCBI)	22965.8	0.367802	0.0707479	5.19877	2.00607e-07	7.88692e-07	0.000900727	FALSE
BW25113_2432	yfeY	hypothetical protein (NCBI)	2567.52	0.367673	0.160197	2.29513	0.0217255	0.038423	97.5477	FALSE
BW25113_0415	ribE		12152.1	0.367429	0.122627	2.99631	0.00273266	0.00581876	12.2696	FALSE
BW25113_4536	yobH	hypothetical protein (NCBI)	763.051	0.366833	0.139922	2.6217	0.0087493	0.0168731	39.2843	FALSE
BW25113_0403	malZ	maltodextrin glucosidase (NCBI)	1376.9	0.366757	0.110348	3.32363	0.000888556	0.00206163	3.98961	FALSE
BW25113_3031	yqiA	predicted esterase (NCBI)	11.6733	0.366493	0.721316	0.508089	0.611391	0.687373	2745.14	FALSE
BW25113_0029	ispH		9513.91	0.366262	0.136181	2.68952	0.00715548	0.014066	32.1281	FALSE
BW25113_1808	yoaA	conserved protein with nucleoside triphosphate hydrolase domain (NCBI)	3193.07	0.365898	0.0854009	4.28448	1.83169e-05	5.5496e-05	0.0822429	FALSE
BW25113_2717	hycI	protease involved in processing C-terminal end of HycE (NCBI)	584.819	0.364146	0.125631	2.89854	0.00374903	0.00775792	16.8331	FALSE
BW25113_3807	cyaY	frataxin-like protein (NCBI)	1553.53	0.363257	0.136801	2.65537	0.00792205	0.0154306	35.57	FALSE
BW25113_4444	omrA	unknown RNA (NCBI)	25.6208	0.362807	0.350684	1.03457	0.30087	0.386488	1350.91	FALSE
BW25113_0389	yaiA	hypothetical protein (NCBI)	760.842	0.361917	0.13525	2.67591	0.00745275	0.0145927	33.4628	FALSE
BW25113_0291	ecpC	predicted aromatic compound dioxygenase (NCBI)	363.835	0.36144	0.165589	2.18275	0.0290541	0.0499249	130.453	FALSE
BW25113_0840	deoR	DNA-binding transcriptional repressor (NCBI)	2815.17	0.361351	0.106726	3.38579	0.000709746	0.0016754	3.18676	FALSE
BW25113_1759	nudG		343.454	0.361062	0.127841	2.82429	0.00473848	0.00962308	21.2758	FALSE
BW25113_0423	thiI	thiamine biosynthesis protein ThiI (NCBI)	11830.4	0.360451	0.143213	2.51689	0.0118394	0.0222811	53.159	FALSE
BW25113_1811	yoaH	hypothetical protein (NCBI)	673.452	0.360247	0.0912723	3.94695	7.9153e-05	0.00021839	0.355397	FALSE
BW25113_0780	ybhK	predicted transferase with NAD(P)-binding Rossmann-fold domain (NCBI)	2890.89	0.360003	0.0849635	4.23715	2.26377e-05	6.78524e-05	0.101643	FALSE
BW25113_2073	yegL	hypothetical protein (NCBI)	133.827	0.359967	0.766557	0.46959	0.638648	0.710702	2867.53	FALSE
BW25113_2074	mdtA	putative membrane protein (VIMSS)	11.0083	0.359893	0.482451	0.745967	0.455688	0.543272	2046.04	FALSE
BW25113_2495	yfgD	predicted oxidoreductase (NCBI)	3388.72	0.358762	0.0908138	3.95052	7.79813e-05	0.00021529	0.350136	FALSE
BW25113_2262	menB	naphthoate synthase (NCBI)	6392.51	0.357788	0.0786686	4.54804	5.41479e-06	1.75834e-05	0.0243124	FALSE
BW25113_1186	nhaB	NhaB sodium/proton transporter (Katherine Huang)	8755.28	0.357219	0.0507836	7.03413	2.00503e-12	1.31073e-11	9.00257e-09	FALSE
BW25113_2188	yejM	predicted hydrolase, inner membrane (NCBI)	9949.48	0.355913	0.120184	2.9614	0.00306239	0.00645033	13.7501	FALSE
BW25113_0664	glnX		2153	0.355847	0.230113	1.5464	0.122008	0.177965	547.817	FALSE
BW25113_1147	ymfL	e14 prophage; predicted DNA-binding transcriptional regulator (RefSeq)	110.571	0.355111	0.277547	1.27946	0.200734	0.275103	901.297	FALSE
BW25113_0386	proC	pyrroline-5-carboxylate reductase (NCBI)	3708.05	0.354896	0.0938437	3.78178	0.000155713	0.000412593	0.699151	FALSE
BW25113_1559	quuQ	orf, hypothetical protein (VIMSS)	154.149	0.354808	0.150472	2.35797	0.0183754	0.0330462	82.5056	FALSE
BW25113_3203	hpf	predicted ribosome-associated, sigma 54 modulation protein (NCBI)	5138.93	0.354381	0.0735406	4.81886	1.44383e-06	5.0472e-06	0.00648278	FALSE
BW25113_0631	ybeD		4152.55	0.353679	0.113413	3.1185	0.00181773	0.00399794	8.16161	FALSE
BW25113_2828	lgt		3894.8	0.353604	0.0863777	4.0937	4.24544e-05	0.000123049	0.19062	FALSE
BW25113_2624	alpA	CP4-57 prophage; DNA-binding transcriptional activator (NCBI)	31.6452	0.352654	0.388144	0.908566	0.36358	0.451267	1632.47	FALSE
BW25113_3590	selB	selenocysteinyl-tRNA-specific translation factor (NCBI)	3976.22	0.352415	0.0606307	5.81248	6.15536e-09	2.89534e-08	2.76375e-05	FALSE
BW25113_1472	yddL		4.41796	0.352057	0.909388	0.387137	0.698655	0.762138	3136.96	FALSE
BW25113_3104	yhaI	predicted inner membrane protein (NCBI)	53.8074	0.351438	0.382729	0.918241	0.358493	0.446813	1609.63	FALSE
BW25113_4095	phnM	carbon-phosphorus lyase complex subunit (NCBI)	60.9007	0.350891	0.346393	1.01298	0.311067	0.398102	1396.69	FALSE
BW25113_2029	gnd	6-phosphogluconate dehydrogenase (NCBI)	67483.3	0.349473	0.0653952	5.34402	9.09083e-08	3.74505e-07	0.000408178	FALSE
BW25113_1884	cheR	chemotaxis regulator, protein-glutamate methyltransferase (NCBI)	52.7235	0.349199	0.25445	1.37237	0.169949	0.237749	763.073	FALSE
BW25113_0647	ybeT	conserved outer membrane protein (NCBI)	19.0273	0.349058	0.471248	0.74071	0.458869	0.546058	2060.32	FALSE
BW25113_3633	waaA		3873.87	0.348555	0.143724	2.42516	0.0153017	0.0281979	68.7046	FALSE
BW25113_0067	thiP	thiamin ABC transporter membrane protein (NCBI)	819.108	0.348462	0.132342	2.63305	0.00846223	0.016383	37.9954	FALSE
BW25113_2610	ffh		23266	0.347562	0.0625421	5.55725	2.74058e-08	1.19139e-07	0.000123052	FALSE
BW25113_0774	bioA	adenosylmethionine--8-amino-7-oxononanoate transaminase (NCBI)	292.023	0.346183	0.16242	2.1314	0.033056	0.0560064	148.422	FALSE
BW25113_1048	opgG	glucan biosynthesis protein, periplasmic (NCBI)	19514.5	0.346039	0.0716867	4.8271	1.38539e-06	4.86951e-06	0.00622039	FALSE
BW25113_3818	yigG		40.3272	0.345505	0.291617	1.18479	0.236101	0.314933	1060.09	FALSE
BW25113_1590	ynfH	oxidoreductase, membrane subunit (NCBI)	510.354	0.344788	0.132975	2.59288	0.00951761	0.0182214	42.7341	FALSE
BW25113_0028	fkpB	FKBP-type peptidyl-prolyl cis-trans isomerase (rotamase) (NCBI)	4488.03	0.344479	0.0860904	4.00137	6.29774e-05	0.000177478	0.282768	FALSE
BW25113_2466	ypfG	hypothetical protein (NCBI)	807.41	0.343481	0.143741	2.38958	0.0168675	0.0306669	75.735	FALSE
BW25113_2953	yggU	orf, hypothetical protein (VIMSS)	1756.59	0.342253	0.109705	3.11976	0.00180999	0.00398286	8.12683	FALSE
BW25113_2328	mepA	penicillin-insensitive murein endopeptidase (NCBI)	2718.93	0.342101	0.0881623	3.88036	0.000104302	0.000283068	0.468314	FALSE
BW25113_0892	rarA	recombination protein (NCBI)	5448.48	0.342053	0.0813	4.20729	2.58453e-05	7.70027e-05	0.116045	FALSE
BW25113_1526	yneJ	predicted DNA-binding transcriptional regulator (NCBI)	446.32	0.341818	0.194747	1.75519	0.0792275	0.121709	355.732	FALSE
BW25113_0522	purK	phosphoribosylaminoimidazole carboxylase (NCBI)	1623.55	0.341111	0.116745	2.92184	0.00347969	0.00725084	15.6238	FALSE
BW25113_2512	bamB	protein assembly complex, lipoprotein component (NCBI)	28543.6	0.340615	0.0690483	4.93301	8.09736e-07	2.92184e-06	0.00363572	FALSE
BW25113_1826	mgrB		2968.25	0.340021	0.0852613	3.98799	6.66358e-05	0.000186964	0.299195	FALSE
BW25113_2231	gyrA		103976	0.339842	0.074863	4.53952	5.63826e-06	1.82561e-05	0.0253158	FALSE
BW25113_2083	yegZ	orf, hypothetical protein (VIMSS)	25.2833	0.339295	0.338277	1.00301	0.315856	0.402734	1418.19	FALSE
BW25113_1816	yoaE	fused predicted membrane protein/conserved protein (NCBI)	2597.5	0.338196	0.111482	3.03364	0.00241626	0.00519443	10.849	FALSE
BW25113_2952	yggT	predicted inner membrane protein (NCBI)	3373.25	0.336267	0.0841402	3.99651	6.42843e-05	0.00018082	0.288636	FALSE
BW25113_2099	yegU	predicted hydrolase (NCBI)	655.348	0.335297	0.12634	2.65391	0.00795644	0.0154841	35.7244	FALSE
BW25113_0206	aspU		6.00697	0.334804	0.840298	0.398435	0.69031	0.753953	3099.49	FALSE
BW25113_3650	spoT	bifunctional (p)ppGpp synthetase II/ guanosine-3',5'-bis pyrophosphate 3'-pyrophosphohydrolase (NCBI)	29289.1	0.33451	0.112288	2.97903	0.00289161	0.00612228	12.9833	FALSE
BW25113_0635	mrdA		8472.23	0.334504	0.207931	1.60873	0.107676	0.159548	483.465	FALSE
BW25113_4713	agrB		17.0506	0.334448	0.471823	0.708842	0.478422	0.564306	2148.12	FALSE
BW25113_1610	tus	DNA replication terminus site-binding protein (NCBI)	1174.79	0.334136	0.128795	2.59433	0.00947755	0.0181602	42.5542	FALSE
BW25113_0829	gsiA	fused predicted peptide transport subunits of ABC superfamily: ATP-binding components (RefSeq)	2132.56	0.333892	0.147495	2.26375	0.0235893	0.041279	105.916	FALSE
BW25113_2602	yfiL	orf, hypothetical protein (VIMSS)	95.5949	0.333572	0.252137	1.32298	0.185843	0.257729	834.437	FALSE
BW25113_3160	yhbW	predicted enzyme (NCBI)	1457.69	0.333518	0.117233	2.84491	0.00444242	0.00905881	19.9464	FALSE
BW25113_2151	galS	DNA-binding transcriptional repressor (NCBI)	3898.13	0.333342	0.539822	0.617504	0.536902	0.620451	2410.69	FALSE
BW25113_3997	hemE		7634.89	0.333192	0.0701449	4.75005	2.03365e-06	6.96761e-06	0.00913107	FALSE
BW25113_2733	mutS	DNA mismatch repair protein (NCBI)	7304.01	0.333113	0.0774716	4.2998	1.70949e-05	5.1934e-05	0.0767559	FALSE
BW25113_0072	leuC	isopropylmalate isomerase large subunit (NCBI)	758.635	0.333056	0.112445	2.96194	0.00305704	0.0064473	13.7261	FALSE
BW25113_3429	glgA	glycogen synthase (NCBI)	14.8376	0.332044	0.412379	0.805192	0.420709	0.50821	1888.98	FALSE
BW25113_2713	hydN	formate dehydrogenase-H, [4Fe-4S] ferredoxin subunit (NCBI)	115.199	0.331899	0.295557	1.12296	0.261454	0.343643	1173.93	FALSE
BW25113_1086	rluC	23S rRNA pseudouridylate synthase (NCBI)	10156.4	0.331388	0.185401	1.78741	0.0738713	0.114502	331.682	FALSE
BW25113_1180	ycgM	predicted isomerase/hydrolase (NCBI)	2575.69	0.330881	0.109891	3.011	0.00260392	0.00557111	11.6916	FALSE
BW25113_2211	yojI	fused predicted multidrug transport subunits of ABC superfamily: membrane component/ATP-binding component (NCBI)	4982.52	0.330168	0.201223	1.64081	0.100837	0.150767	452.758	FALSE
BW25113_0054	lptD		35758.5	0.32885	0.118585	2.77312	0.0055522	0.0111492	24.9294	FALSE
BW25113_1823	cspC	stress protein, member of the CspA-family (NCBI)	41710.3	0.328749	0.112603	2.91953	0.00350563	0.0073015	15.7403	FALSE
BW25113_3574	yiaJ	predicted DNA-binding transcriptional repressor (NCBI)	907.031	0.328711	0.0792974	4.14529	3.39378e-05	9.96556e-05	0.152381	FALSE
BW25113_3626	waaJ	UDP-D-glucose:(galactosyl)lipopolysaccharide glucosyltransferase (NCBI)	2583.52	0.328672	0.157109	2.092	0.0364383	0.0611814	163.608	FALSE
BW25113_2985	yghS	predicted protein with nucleoside triphosphate hydrolase domain (NCBI)	50.3081	0.327795	0.274224	1.19535	0.23195	0.310793	1041.45	FALSE
BW25113_0937	ssuE	NAD(P)H-dependent FMN reductase (NCBI)	62.0996	0.326982	0.264359	1.23689	0.216129	0.293033	970.419	FALSE
BW25113_4556	glvG		90.1473	0.326607	1.17097	0.278921	0.780305	0.828994	3503.57	FALSE
BW25113_0793	ybhS	predicted transporter subunit: membrane component of ABC superfamily (NCBI)	405.308	0.3261	0.154173	2.11516	0.034416	0.0580252	154.528	FALSE
BW25113_2788	gudX	predicted glucarate dehydratase (NCBI)	209.629	0.325468	0.201714	1.61352	0.106633	0.158533	478.78	FALSE
BW25113_0381	ddlA	D-alanylalanine synthetase (NCBI)	10879.7	0.324661	0.0672912	4.82472	1.40201e-06	4.91638e-06	0.00629504	FALSE
BW25113_2954	rdgB	putative deoxyribonucleotide triphosphate pyrophosphatase (NCBI)	3646.52	0.324029	0.101341	3.19742	0.00138661	0.00309687	6.22587	FALSE
BW25113_0157	yadS	conserved inner membrane protein (NCBI)	1259.85	0.323589	0.157819	2.05038	0.0403272	0.0669329	181.069	FALSE
BW25113_0869	ybjT	putative dTDP-glucose enzyme (VIMSS)	2312.76	0.323298	0.117673	2.74743	0.00600635	0.0119646	26.9685	FALSE
BW25113_3494	uspB	universal stress protein UspB (NCBI)	282.769	0.323161	0.181626	1.77927	0.0751953	0.116152	337.627	FALSE
BW25113_0369	hemB		7944.15	0.322756	0.0871023	3.70549	0.000210986	0.000543298	0.947326	FALSE
BW25113_2200	ccmB	heme exporter subunit (NCBI)	184.776	0.322245	0.253039	1.2735	0.20284	0.277603	910.751	FALSE
BW25113_3086	ygjQ	predicted thioredoxin-like (NCBI)	96.477	0.321888	0.229652	1.40163	0.161025	0.22718	723.003	FALSE
BW25113_2969	yghE	predicted secretion pathway protein, L-type protein (pseudogene) (RefSeq)	1244.92	0.321472	0.179457	1.79135	0.0732365	0.113597	328.832	FALSE
BW25113_2542	hcaD	phenylpropionate dioxygenase, ferredoxin reductase subunit (NCBI)	225.378	0.321232	0.154348	2.08122	0.0374139	0.0625848	167.988	FALSE
BW25113_3343	tusB		1833.42	0.320966	0.0845286	3.79713	0.000146382	0.000388788	0.657254	FALSE
BW25113_1433	ydcO	putative membrane transport protein (VIMSS)	327.815	0.320391	0.161822	1.9799	0.047715	0.0778956	214.24	FALSE
BW25113_1741	cho	endonuclease of nucleotide excision repair (NCBI)	529.027	0.319866	0.125452	2.54971	0.0107811	0.0204222	48.4073	FALSE
BW25113_4497	yeeL		44.5263	0.319003	0.311032	1.02563	0.305066	0.391316	1369.75	FALSE
BW25113_3563	yiaB	orf, hypothetical protein (VIMSS)	41.3844	0.317815	0.356054	0.892603	0.37207	0.460383	1670.59	FALSE
BW25113_1834	yebT	orf, hypothetical protein (VIMSS)	3117.79	0.31771	0.0851049	3.73316	0.000189095	0.000491599	0.849037	FALSE
BW25113_3993	thiE	thiamine-phosphate pyrophosphorylase (NCBI)	11.1208	0.317603	0.493186	0.643982	0.519587	0.604691	2332.95	FALSE
BW25113_3933	ftsN	essential cell division protein (NCBI)	7171.02	0.317411	0.150587	2.10783	0.035046	0.0590206	157.356	FALSE
BW25113_2763	cysI	sulfite reductase, beta subunit, NAD(P)-binding, heme-binding (NCBI)	3704.12	0.316185	0.729412	0.433479	0.664667	0.733279	2984.35	FALSE
BW25113_0778	bioD	dethiobiotin synthetase (NCBI)	171.192	0.315861	0.174215	1.81305	0.069824	0.109097	313.51	FALSE
BW25113_4652	yibU		8.31924	0.31582	0.604023	0.522862	0.60107	0.678838	2698.81	FALSE
BW25113_3466	yhhL	conserved inner membrane protein (NCBI)	648.284	0.315043	0.0986603	3.19321	0.001407	0.00314086	6.31744	FALSE
BW25113_2635	ypjK	CP4-57 prophage; predicted inner membrane protein (NCBI)	5.7444	0.314455	1.27833	0.245988	0.805691	0.849314	3617.55	FALSE
BW25113_4239	treC	trehalose-6-P hydrolase (NCBI)	44420.5	0.313728	0.269624	1.16358	0.244596	0.324533	1098.24	FALSE
BW25113_2395	yfeA	orf, hypothetical protein (VIMSS)	1969.21	0.313373	0.144316	2.17144	0.0298979	0.0511589	134.242	FALSE
BW25113_1254	yciB		2823.69	0.313372	0.109125	2.87168	0.00408303	0.00836404	18.3328	FALSE
BW25113_3564	xylB	xylulokinase (NCBI)	488.372	0.313242	0.173443	1.80602	0.0709152	0.110464	318.409	FALSE
BW25113_0982	etp	putative phosphatase (VIMSS)	79.4918	0.312698	0.264907	1.18041	0.237839	0.316977	1067.9	FALSE
BW25113_0474	adk		21370.9	0.312666	0.131582	2.37621	0.0174913	0.0316852	78.5358	FALSE
BW25113_3881	yihT	predicted aldolase (NCBI)	120.447	0.312217	0.215632	1.44792	0.147641	0.209884	662.907	FALSE
BW25113_3625	waaY	lipopolysaccharide core biosynthesis protein (NCBI)	1332.01	0.311733	0.178716	1.74429	0.0811087	0.12413	364.178	FALSE
BW25113_2960	trmI	tRNA(m7G46)-methyltransferase (NCBI)	6314.43	0.310342	0.11606	2.67398	0.00749567	0.0146703	33.6555	FALSE
BW25113_1602	pntB	pyridine nucleotide transhydrogenase (NCBI)	10876.9	0.310278	0.102091	3.03922	0.00237189	0.00510886	10.6498	FALSE
BW25113_3138	agaB	N-acetylgalactosamine-specific enzyme IIB component of PTS (NCBI)	26.2428	0.309607	0.411192	0.752949	0.45148	0.539272	2027.15	FALSE
BW25113_4519	icdC		38.6677	0.309557	0.334183	0.926311	0.354285	0.442491	1590.74	FALSE
BW25113_3414	nfuA	predicted gluconate transport associated protein (NCBI)	13386.1	0.309275	0.0783709	3.9463	7.9368e-05	0.000218848	0.356362	FALSE
BW25113_0174	ispU		13121.5	0.308278	0.139135	2.21568	0.0267132	0.0462754	119.942	FALSE
BW25113_2100	yegV	predicted kinase (NCBI)	665.657	0.307572	0.0950034	3.23748	0.0012059	0.00272454	5.41451	FALSE
BW25113_4446	sibC	Novel sRNA, function unknown; paralogous to the other QUAD sRNA genes (RefSeq)	226.722	0.307393	0.124858	2.46195	0.0138185	0.025676	62.045	FALSE
BW25113_4469	ygiQ	hypothetical protein (NCBI)	9272.85	0.306877	0.179354	1.71101	0.0870785	0.132093	390.983	FALSE
BW25113_4585	chiX	Novel sRNA, function unknown (RefSeq)	32.9681	0.306643	0.326802	0.938313	0.348083	0.436249	1562.89	FALSE
BW25113_2414	cysK	cysteine synthase A, O-acetylserine sulfhydrolase A subunit (NCBI)	12734.6	0.306231	0.231098	1.32512	0.185133	0.257187	831.246	FALSE
BW25113_4445	omrB	sRNA down regulates OM proteins; positively regulated by OmpR/EnvZ; binds Hfq (RefSeq)	30.512	0.305781	0.369408	0.827759	0.407807	0.495133	1831.05	FALSE
BW25113_0095	ftsZ		28669.8	0.30535	0.0575176	5.3088	1.10347e-07	4.49212e-07	0.000495457	FALSE
BW25113_0461	tomB	hypothetical protein (NCBI)	1786.3	0.305134	0.123074	2.47927	0.0131651	0.0245638	59.1111	FALSE
BW25113_4192	ulaG	orf, hypothetical protein (VIMSS)	366.61	0.304723	0.133306	2.28589	0.022261	0.0392614	99.9517	FALSE
BW25113_0071	leuD	isopropylmalate isomerase small subunit (NCBI)	429.204	0.303978	0.109737	2.77006	0.00560465	0.0112344	25.1649	FALSE
BW25113_0572	cusC	copper/silver efflux system, outer membrane component (NCBI)	57.8783	0.30339	0.346383	0.875879	0.381096	0.469476	1711.12	FALSE
BW25113_3222	nanK	putative NAGC-like transcriptional regulator (VIMSS)	1159.51	0.303222	0.392335	0.772866	0.439602	0.526911	1973.81	FALSE
BW25113_1359	ydaU	Rac prophage; conserved protein (NCBI)	97.4221	0.302762	0.200403	1.51077	0.130848	0.189492	587.506	FALSE
BW25113_0968	yccX	predicted acylphosphatase (NCBI)	293.412	0.302449	0.146817	2.06004	0.0393951	0.0656047	176.884	FALSE
BW25113_1546	tfaQ		51.5995	0.301844	0.314519	0.959701	0.337206	0.425292	1514.05	FALSE
BW25113_3597	yibH	hypothetical protein (NCBI)	150.104	0.300321	0.197236	1.52265	0.127847	0.185635	574.034	FALSE
BW25113_0486	ybaT	predicted transporter (NCBI)	201.861	0.300169	0.146171	2.05355	0.0400191	0.0665303	179.686	FALSE
BW25113_2330	prmB		8414.73	0.299533	0.072384	4.13811	3.50171e-05	0.000102488	0.157227	FALSE
BW25113_2631	rnlB	orf, hypothetical protein (VIMSS)	1116.45	0.299403	0.119622	2.50292	0.0123174	0.0230783	55.305	FALSE
BW25113_1179	ycgL	conserved protein (NCBI)	1711.31	0.299354	0.0653155	4.58319	4.57928e-06	1.50007e-05	0.020561	FALSE
BW25113_2324	mnmC	putative peptidase (VIMSS)	3680.81	0.299266	0.0730197	4.09843	4.15963e-05	0.000120718	0.186767	FALSE
BW25113_0493	ybbO	short chain dehydrogenase (NCBI)	2671.51	0.299041	0.125171	2.38905	0.0168918	0.0306863	75.8444	FALSE
BW25113_2339	yfcV	predicted fimbrial-like adhesin protein (NCBI)	22.3255	0.298194	0.525976	0.566936	0.570758	0.650675	2562.7	FALSE
BW25113_1556	essQ	orf, hypothetical protein (VIMSS)	13.238	0.297754	0.670915	0.443803	0.657185	0.727175	2950.76	FALSE
BW25113_2104	thiM	hydroxyethylthiazole kinase (NCBI)	433.23	0.29754	0.137191	2.1688	0.0300979	0.0514224	135.139	FALSE
BW25113_1769	ydjE	predicted transporter (NCBI)	272.453	0.29709	0.1994	1.48992	0.136246	0.196302	611.743	FALSE
BW25113_2437	eutR	predicted DNA-binding transcriptional regulator (NCBI)	328.948	0.29702	0.113666	2.61309	0.00897289	0.0172523	40.2883	FALSE
BW25113_2844	yqeF	putative acyltransferase (VIMSS)	6168.99	0.296766	0.581882	0.51001	0.610044	0.686549	2739.1	FALSE
BW25113_2719	hycG	hydrogenase 3 and formate hydrogenase complex, HycG subunit (NCBI)	132.355	0.296606	0.168578	1.75945	0.0785003	0.120674	352.467	FALSE
BW25113_3468	yhhN	conserved inner membrane protein (NCBI)	1077.19	0.295979	0.199206	1.48579	0.137334	0.197679	616.629	FALSE
BW25113_1843	yobB	hypothetical protein (NCBI)	646.385	0.295815	0.127642	2.31755	0.0204739	0.0364251	91.9277	FALSE
BW25113_1544	ydfK		47.8405	0.295567	0.40874	0.723116	0.469608	0.55603	2108.54	FALSE
BW25113_2627	yfjK	CP4-57 prophage; conserved protein (NCBI)	1681.95	0.295473	0.0873217	3.38373	0.000715078	0.0016871	3.2107	FALSE
BW25113_4631	ykgQ		10.2646	0.295463	0.565907	0.522106	0.601597	0.679261	2701.17	FALSE
BW25113_3146	rsmI	predicted methyltransferase (NCBI)	1464.52	0.295035	0.0917499	3.21564	0.00130155	0.00292001	5.84395	FALSE
BW25113_4608	ohsC	Novel sRNA, function unknown (RefSeq)	1.96691	0.294861	1.08179	0.272567	0.785186	0.832433	3525.49	FALSE
BW25113_4011	yjaA	hypothetical protein (NCBI)	89.6528	0.294647	0.315436	0.934096	0.350254	0.437989	1572.64	FALSE
BW25113_3095	yqjA	conserved inner membrane protein (NCBI)	2711.83	0.293229	0.0761949	3.84841	0.000118885	0.000320124	0.533793	FALSE
BW25113_2591	rrsG		26346.1	0.292895	0.378883	0.773048	0.439494	0.526911	1973.33	FALSE
BW25113_2611	ypjD	predicted inner membrane protein (RefSeq)	1663.88	0.292817	0.0992305	2.95088	0.00316871	0.00665548	14.2275	FALSE
BW25113_0775	bioB	biotin synthase (NCBI)	255.466	0.292659	0.19531	1.49844	0.13402	0.193532	601.751	FALSE
BW25113_3978	glyT		9658	0.292363	0.0906176	3.22633	0.00125387	0.00282436	5.62987	FALSE
BW25113_2722	hycD	hydrogenase 3, membrane subunit (NCBI)	34.2391	0.291802	0.73208	0.398593	0.690193	0.753953	3098.97	FALSE
BW25113_1306	pspC	DNA-binding transcriptional activator (NCBI)	524.737	0.291288	0.10707	2.72055	0.00651738	0.0128965	29.263	FALSE
BW25113_0777	bioC	predicted methltransferase, enzyme of biotin synthesis (NCBI)	153.227	0.290928	0.23403	1.24312	0.213823	0.290239	960.065	FALSE
BW25113_3998	nfi	endonuclease V (deoxyinosine 3'endoduclease) (VIMSS)	2888.73	0.290287	0.0746295	3.88971	0.000100366	0.000273381	0.450642	FALSE
BW25113_2573	rpoE		12939.8	0.29023	0.192203	1.51001	0.13104	0.189656	588.368	FALSE
BW25113_2119	yehL	orf, hypothetical protein (VIMSS)	75.2831	0.289355	0.232053	1.24693	0.212422	0.288512	953.773	FALSE
BW25113_1291	sapD	predicted antimicrobial peptide transporter subunit (NCBI)	2500.7	0.289305	0.0747336	3.87115	0.000108324	0.000293628	0.486373	FALSE
BW25113_2267	elaA	predicted acyltransferase with acyl-CoA N-acyltransferase domain (NCBI)	903.608	0.288858	0.144972	1.99251	0.0463156	0.0757492	207.957	FALSE
BW25113_1797	yeaR	hypothetical protein (NCBI)	95.2579	0.288627	0.219755	1.31341	0.189046	0.261442	848.817	FALSE
BW25113_1246	oppD	oligopeptide transporter ATP-binding component (NCBI)	31374	0.287997	0.0832883	3.45783	0.000544537	0.00130888	2.44497	FALSE
BW25113_1679	sufE	cysteine desufuration protein SufE (NCBI)	363.061	0.286996	0.111856	2.56576	0.010295	0.0195508	46.2244	FALSE
BW25113_1063	yceB	predicted lipoprotein (NCBI)	1769.46	0.286744	0.09443	3.03657	0.00239284	0.00515151	10.7439	FALSE
BW25113_4136	dsbD	thiol:disulfide interchange protein precursor (NCBI)	3005.16	0.286334	0.108892	2.62953	0.00855035	0.016525	38.3911	FALSE
BW25113_0643	ybeL	hypothetical protein (NCBI)	1541.41	0.285707	0.192653	1.48301	0.138072	0.19855	619.941	FALSE
BW25113_3981	secE		21344.3	0.28543	0.116526	2.44949	0.0143059	0.0265266	64.2333	FALSE
BW25113_1111	ycfQ	orf, hypothetical protein (VIMSS)	1255.4	0.284509	0.0902807	3.15138	0.00162499	0.00359699	7.29622	FALSE
BW25113_0124	gcd	glucose dehydrogenase (NCBI)	8311.85	0.284325	0.107217	2.65186	0.00800496	0.015565	35.9423	FALSE
BW25113_2012	yeeD	hypothetical protein (NCBI)	1600.38	0.284124	0.613859	0.462849	0.643472	0.71465	2889.19	FALSE
BW25113_0303	rclB		23.4576	0.283774	0.634443	0.44728	0.654673	0.724753	2939.48	FALSE
BW25113_2372	yfdV	predicted transporter (NCBI)	36.9081	0.283606	0.338843	0.836982	0.402603	0.489507	1807.69	FALSE
BW25113_2539	hcaF	3-phenylpropionate dioxygenase, small (beta) subunit (NCBI)	70.9588	0.283425	0.257362	1.10127	0.270779	0.353925	1215.8	FALSE
BW25113_3849	trkH	potassium transporter (NCBI)	4242.74	0.283274	0.0817503	3.46511	0.000530015	0.00127602	2.37977	FALSE
BW25113_2077	mdtD	multidrug efflux system protein (NCBI)	290.684	0.28301	0.129568	2.18425	0.0289437	0.049755	129.957	FALSE
BW25113_1143	ymfI	orf, hypothetical protein (VIMSS)	474.825	0.282948	0.147433	1.91917	0.0549634	0.0882915	246.786	FALSE
BW25113_4114	eptA	orf, hypothetical protein (VIMSS)	3074.62	0.282045	0.13511	2.08752	0.0368412	0.0617421	165.417	FALSE
BW25113_4393	trpR	Trp operon repressor (NCBI)	758.265	0.281593	0.178426	1.57821	0.114518	0.168356	514.187	FALSE
BW25113_1209	lolB		2311.46	0.280055	0.077562	3.61073	0.000305335	0.000764704	1.37096	FALSE
BW25113_4231	yjfF	putative transport system permease protein (VIMSS)	289.331	0.279849	0.119849	2.33502	0.0195424	0.0349067	87.7455	FALSE
BW25113_0810	glnP	glutamine ABC transporter permease protein (NCBI)	1734.99	0.279057	0.180491	1.5461	0.122081	0.178014	548.145	FALSE
BW25113_1915	yecF	hypothetical protein (NCBI)	1129.61	0.278807	0.144813	1.92529	0.0541932	0.0872312	243.327	FALSE
BW25113_3507	dctR	protein involved in metabolism of C4-dicarboxylates (Katherine Huang)	25.1077	0.278795	0.372304	0.748837	0.453956	0.541939	2038.26	FALSE
BW25113_0751	pnuC	predicted nicotinamide mononucleotide transporter (NCBI)	612.766	0.275994	0.135417	2.03811	0.0415393	0.0686903	186.512	FALSE
BW25113_1824	yobF	hypothetical protein (NCBI)	40097.5	0.275955	0.137761	2.00315	0.0451617	0.0739701	202.776	FALSE
BW25113_2638	yfjU	CP4-57 prophage; conserved protein (RefSeq)	69.4544	0.275335	0.25131	1.0956	0.273254	0.356847	1226.91	FALSE
BW25113_2139	mdtQ	orf, hypothetical protein (VIMSS)	56.4066	0.2751	0.322007	0.854329	0.392923	0.480477	1764.22	FALSE
BW25113_1138	ymfE	e14 prophage; predicted inner membrane protein (NCBI)	274.5	0.274745	0.241932	1.13563	0.256112	0.338409	1149.94	FALSE
BW25113_0808	ybiO	putative transport protein (VIMSS)	372.35	0.27469	0.131691	2.08587	0.0369901	0.0619624	166.085	FALSE
BW25113_1290	sapF	predicted antimicrobial peptide transporter subunit (NCBI)	1479.42	0.274045	0.0806004	3.40005	0.000673736	0.00159376	3.02508	FALSE
BW25113_2276	nuoN	NADH:ubiquinone oxidoreductase, membrane subunit N (RefSeq)	24239	0.274024	0.14322	1.91331	0.0557085	0.089381	250.131	FALSE
BW25113_0450	glnK	nitrogen assimilation regulatory protein for GlnL, GlnE, and AmtB (NCBI)	16.6041	0.272711	0.604141	0.451402	0.6517	0.721997	2926.13	FALSE
BW25113_1762	ynjI	orf, hypothetical protein (VIMSS)	563.059	0.271806	0.1135	2.39476	0.0166311	0.0303105	74.6737	FALSE
BW25113_0756	galM	galactose-1-epimerase (mutarotase) (NCBI)	17847.8	0.271346	0.156552	1.73326	0.0830494	0.126883	372.892	FALSE
BW25113_1253	yciA	predicted hydrolase (NCBI)	1614.76	0.271118	0.15407	1.7597	0.0784579	0.120651	352.276	FALSE
BW25113_0494	tesA	multifunctional acyl-CoA thioesterase I and protease I and lysophospholipase L1 (NCBI)	1599.09	0.271111	0.127323	2.12932	0.0332281	0.0562341	149.194	FALSE
BW25113_3710	mdtL	multidrug efflux system protein (NCBI)	409.066	0.270826	0.147533	1.8357	0.0664024	0.104407	298.147	FALSE
BW25113_1577	ydfE	Qin prophage; predicted protein (RefSeq)	45.2255	0.270585	0.347456	0.778759	0.436122	0.523721	1958.19	FALSE
BW25113_0405	queA	S-adenosylmethionine:tRNA ribosyltransferase-isomerase (NCBI)	5365.43	0.269819	0.188647	1.43028	0.152635	0.216229	685.332	FALSE
BW25113_3624	waaZ	lipopolysaccharide core biosynthesis protein (NCBI)	1157.13	0.269633	0.226045	1.19283	0.232937	0.311836	1045.89	FALSE
BW25113_2277	nuoM	NADH dehydrogenase subunit M (NCBI)	25943.3	0.268684	0.139314	1.92861	0.0537789	0.0867411	241.467	FALSE
BW25113_0159	mtn		10498.6	0.26865	0.0763769	3.51743	0.000435748	0.00106337	1.95651	FALSE
BW25113_0586	entF	enterobactin synthase multienzyme complex component, ATP-dependent (NCBI)	6450.96	0.268495	0.128232	2.09382	0.036276	0.0609774	162.879	FALSE
BW25113_4141	yjeH	predicted transporter (NCBI)	623.651	0.267723	0.123631	2.1655	0.0303491	0.0517925	136.268	FALSE
BW25113_2782	mazF	toxin of the ChpA-ChpR toxin-antitoxin system, endoribonuclease (NCBI)	1040.51	0.267583	0.141457	1.89161	0.0585427	0.0935263	262.857	FALSE
BW25113_1670	ydhU	predicted cytochrome (NCBI)	88.5501	0.267537	0.298198	0.897179	0.369623	0.457989	1659.61	FALSE
BW25113_2187	yejL	hypothetical protein (NCBI)	4470.28	0.267484	0.142186	1.88122	0.0599415	0.0955904	269.137	FALSE
BW25113_2534	yfhR	predicted peptidase (RefSeq)	167.955	0.26577	0.259892	1.02262	0.306488	0.392915	1376.13	FALSE
BW25113_2554	glrR	predicted DNA-binding response regulator in two-component system (NCBI)	1660.48	0.265698	0.0996391	2.6666	0.00766229	0.0149572	34.4037	FALSE
BW25113_1495	yddB	predicted porin protein (NCBI)	336.369	0.265445	0.114843	2.31137	0.0208126	0.0369544	93.4488	FALSE
BW25113_1279	yciS	conserved inner membrane protein (NCBI)	2029.09	0.265391	0.105807	2.50826	0.0121328	0.0227802	54.4763	FALSE
BW25113_4420	rdlA		143.203	0.265269	0.188087	1.41035	0.158435	0.223808	711.373	FALSE
BW25113_1305	pspB	phage shock protein B (NCBI)	2.95794	0.26505	0.900139	0.294454	0.768411	0.82064	3450.16	FALSE
BW25113_4419	ldrA		557.983	0.264856	0.110488	2.39714	0.0165236	0.0301519	74.1911	FALSE
BW25113_1461	pptA	4-oxalocrotonate tautomerase (NCBI)	244.965	0.264232	0.122804	2.15165	0.031425	0.0534718	141.098	FALSE
BW25113_2214	apbE	predicted thiamine biosynthesis lipoprotein (NCBI)	1571.74	0.264224	0.16539	1.59758	0.110136	0.162608	494.513	FALSE
BW25113_1680	sufS	selenocysteine lyase (NCBI)	1233.29	0.264127	0.0820168	3.22041	0.00128009	0.00287619	5.74761	FALSE
BW25113_2958	yggN	hypothetical protein (NCBI)	3538.05	0.263823	0.0631854	4.17539	2.97478e-05	8.79859e-05	0.133568	FALSE
BW25113_4615	yibV		13.9854	0.262769	0.738939	0.355603	0.722138	0.78185	3242.4	FALSE
BW25113_2226	yfaQ	hypothetical protein (NCBI)	115.265	0.262018	0.217313	1.20572	0.227927	0.306136	1023.39	FALSE
BW25113_2291	yfbR	hypothetical protein (NCBI)	1186.5	0.261865	0.081134	3.22756	0.00124849	0.00281367	5.60574	FALSE
BW25113_3189	murA		26459.6	0.261079	0.0907549	2.87675	0.00401797	0.0082466	18.0407	FALSE
BW25113_3516	gadX	DNA-binding transcriptional dual regulator (NCBI)	711.515	0.260959	0.205583	1.26936	0.204314	0.279279	917.37	FALSE
BW25113_4105	phnD	phosphonate/organophosphate ester transporter subunit (NCBI)	38.2047	0.260895	0.303304	0.860175	0.389693	0.477832	1749.72	FALSE
BW25113_0975	hyaD	protein involved in processing of HyaA and HyaB proteins (NCBI)	69.7884	0.259254	0.324624	0.798628	0.424506	0.511876	1906.03	FALSE
BW25113_2757	casD	orf, hypothetical protein (VIMSS)	198.599	0.258507	0.165501	1.56197	0.118295	0.173225	531.144	FALSE
BW25113_2928	yggC	hypothetical protein (NCBI)	1126.35	0.258195	0.100447	2.57047	0.010156	0.0193033	45.6004	FALSE
BW25113_1584	speG	spermidine N1-acetyltransferase (NCBI)	4355.29	0.257619	0.0786744	3.2745	0.00105849	0.0024208	4.75263	FALSE
BW25113_3258	panF	sodium/pantothenate symporter (VIMSS)	2922.47	0.256194	0.138296	1.8525	0.0639535	0.101124	287.151	FALSE
BW25113_1262	trpC	N-(5-phosphoribosyl)anthranilate isomerase and indole-3-glycerolphosphate synthetase (VIMSS)	1845.64	0.256186	0.139305	1.83902	0.0659118	0.103844	295.944	FALSE
BW25113_1185	dsbB	reoxidizes DsbA protein following formation of disulfide bond in P-ring of flagella. (VIMSS)	3465.89	0.25607	0.073887	3.46569	0.000528864	0.00127394	2.3746	FALSE
BW25113_1830	prc	carboxy-terminal protease for penicillin-binding protein 3 (NCBI)	29515.7	0.255217	0.118346	2.15654	0.0310418	0.0528537	139.378	FALSE
BW25113_0742	ybgF	hypothetical protein (NCBI)	23520.5	0.254941	0.0714475	3.56823	0.000359398	0.000887691	1.6137	FALSE
BW25113_2702	srlA	glucitol/sorbitol-specific enzyme IIC component of PTS (NCBI)	6024.46	0.254842	0.263233	0.968123	0.332983	0.421572	1495.09	FALSE
BW25113_2619	ratA		3359.49	0.254245	0.0799343	3.18067	0.00146934	0.00326945	6.59734	FALSE
BW25113_3812	yigB	predicted hydrolase (NCBI)	2010.68	0.254088	0.130943	1.94044	0.0523257	0.0846454	234.942	FALSE
BW25113_0957	ompA	outer membrane protein A (3a;II*;G;d) (NCBI)	649986	0.25361	0.0797165	3.1814	0.00146566	0.00326367	6.58083	FALSE
BW25113_4625	symR	Novel sRNA, function unknown (RefSeq)	16.8686	0.253279	0.406957	0.622373	0.533697	0.617597	2396.3	FALSE
BW25113_3065	rpsU		61709.6	0.252664	0.157358	1.60567	0.108346	0.160389	486.476	FALSE
BW25113_1978	yeeJ	adhesin (RefSeq)	1700.6	0.252449	0.102954	2.45205	0.0142046	0.0263607	63.7787	FALSE
BW25113_1215	kdsA		12638.2	0.251885	0.0727792	3.46094	0.00053829	0.00129456	2.41692	FALSE
BW25113_0807	rlmF	orf, hypothetical protein (VIMSS)	2051.04	0.251166	0.208561	1.20428	0.228482	0.306789	1025.88	FALSE
BW25113_3839	tatC	TatABCE protein translocation system subunit (NCBI)	6032.35	0.250384	0.117631	2.12855	0.0332914	0.0563199	149.478	FALSE
BW25113_4544	arnE	hypothetical protein (NCBI)	6.97415	0.250183	0.628669	0.397956	0.690663	0.754154	3101.07	FALSE
BW25113_3278	rrsD		37455.4	0.249569	0.483918	0.515726	0.606046	0.683079	2721.15	FALSE
BW25113_2489	hyfI	hydrogenase 4, Fe-S subunit (NCBI)	105.034	0.249408	0.263846	0.945282	0.344515	0.432746	1546.87	FALSE
BW25113_1711	btuC	vtamin B12-transporter permease (NCBI)	1216.67	0.249198	0.104385	2.38729	0.0169733	0.0308218	76.2102	FALSE
BW25113_1328	pgrR	predicted DNA-binding transcriptional regulator (NCBI)	566.489	0.249129	0.12266	2.03105	0.0422501	0.0696598	189.703	FALSE
BW25113_2177	yejA	orf, hypothetical protein (VIMSS)	1518.09	0.249125	0.089273	2.7906	0.00526109	0.0106122	23.6223	FALSE
BW25113_1049	opgH	glucosyltransferase MdoH (NCBI)	23720.2	0.248863	0.0726859	3.42382	0.000617484	0.00147315	2.7725	FALSE
BW25113_2827	thyA		7133.11	0.247724	0.0941908	2.63002	0.00853786	0.016508	38.335	FALSE
BW25113_0147	ligT	orf, hypothetical protein (VIMSS)	756.37	0.247539	0.0953572	2.59592	0.00943387	0.0180902	42.3581	FALSE
BW25113_1659	ydhB	predicted DNA-binding transcriptional regulator (NCBI)	639.926	0.247422	0.115446	2.14318	0.032099	0.0545086	144.124	FALSE
BW25113_3448	yhhA	hypothetical protein (NCBI)	343.893	0.247288	0.213291	1.1594	0.246294	0.3264	1105.86	FALSE
BW25113_2433	yfeZ	orf, hypothetical protein (VIMSS)	713.307	0.24621	0.112096	2.19641	0.0280625	0.048388	126	FALSE
BW25113_3651	trmH	tRNA (Guanosine-2'-O-)-methyltransferase (NCBI)	3541.19	0.246078	0.113899	2.16049	0.0307347	0.0523905	137.999	FALSE
BW25113_4411	ecnB	entericidin B membrane lipoprotein (NCBI)	438.994	0.245794	0.168507	1.45865	0.144661	0.206303	649.528	FALSE
BW25113_3614	yibQ	orf, hypothetical protein (VIMSS)	2320.45	0.245522	0.108079	2.2717	0.0231048	0.0405898	103.741	FALSE
BW25113_0323	yahI	predicted carbamate kinase-like protein (NCBI)	102.037	0.245277	0.206149	1.1898	0.234124	0.313051	1051.22	FALSE
BW25113_3722	bglF	fused beta-glucoside-specific PTS enzymes: IIA component/IIB component/IIC component (NCBI)	1611.51	0.245158	0.281365	0.871319	0.38358	0.471888	1722.27	FALSE
BW25113_3101	yqjF	orf, hypothetical protein (VIMSS)	109.327	0.244929	0.237607	1.03082	0.302627	0.388521	1358.79	FALSE
BW25113_0833	yliE	conserved inner membrane protein (NCBI)	284.827	0.244792	0.248134	0.986535	0.323871	0.411081	1454.18	FALSE
BW25113_3825	pldB	lysophospholipase L(2) (NCBI)	3157.35	0.244437	0.11273	2.16833	0.0301332	0.0514436	135.298	FALSE
BW25113_4391	yjjK	fused predicted transporter subunits of ABC superfamily: ATP-binding components (NCBI)	39497.5	0.244355	0.0799525	3.05625	0.00224125	0.00484378	10.0632	FALSE
BW25113_1054	lpxL		3788.95	0.243548	0.117077	2.08023	0.0375043	0.0627125	168.394	FALSE
BW25113_0464	acrR	DNA-binding transcriptional repressor (NCBI)	2209.11	0.243446	0.11646	2.09039	0.0365827	0.0613779	164.257	FALSE
BW25113_2350	gtrA	CPS-53 (KpLE1) prophage; bactoprenol-linked glucose translocase (flippase) (NCBI)	2260.99	0.243062	0.113994	2.13224	0.0329872	0.0559109	148.113	FALSE
BW25113_0096	lpxC		57941.7	0.2426	0.0580559	4.17873	2.9314e-05	8.68174e-05	0.13162	FALSE
BW25113_1247	oppF	oligopeptide transporter subunit (NCBI)	31814.5	0.241825	0.0780757	3.09732	0.00195281	0.00426987	8.76813	FALSE
BW25113_0960	yccS	orf, hypothetical protein (VIMSS)	3901.04	0.240661	0.110414	2.17962	0.0292856	0.0502455	131.492	FALSE
BW25113_2510	yfgJ	orf, hypothetical protein (VIMSS)	1238.57	0.240637	0.146544	1.64208	0.100573	0.150473	451.574	FALSE
BW25113_0943	ycbV	putative fimbrial-like protein (VIMSS)	71.91	0.240534	0.23249	1.0346	0.300856	0.386488	1350.84	FALSE
BW25113_0965	yccU	orf, hypothetical protein (VIMSS)	1519.91	0.240026	0.103535	2.31831	0.0204326	0.0363806	91.7423	FALSE
BW25113_0914	msbA		17488.4	0.240007	0.128662	1.8654	0.0621249	0.0985461	278.941	FALSE
BW25113_1845	ptrB	protease II (NCBI)	1336.91	0.239752	0.104903	2.28546	0.0222859	0.0392899	100.064	FALSE
BW25113_4545	ypdJ		5.10785	0.239734	0.702214	0.341398	0.732804	0.790722	3290.29	FALSE
BW25113_4555	yicS	hypothetical protein (NCBI)	67.4712	0.239534	0.225207	1.06362	0.2875	0.37123	1290.88	FALSE
BW25113_3359	argD	bifunctional acetylornithine aminotransferase/ succinyldiaminopimelate aminotransferase (NCBI)	1468.63	0.239407	0.0687418	3.48271	0.000496371	0.00120149	2.2287	FALSE
BW25113_0636	rlmH	hypothetical protein (NCBI)	4652.14	0.239178	0.188139	1.27128	0.203629	0.278597	914.292	FALSE
BW25113_3352	yheS	fused predicted transporter subunits of ABC superfamily: ATP-binding components (NCBI)	7695.74	0.239125	0.0896202	2.6682	0.0076258	0.0148924	34.2399	FALSE
BW25113_2274	yfbO	predicted protein (RefSeq)	65.1605	0.239024	0.258073	0.926187	0.354349	0.442491	1591.03	FALSE
BW25113_0317	yahC	predicted inner membrane protein (NCBI)	36.3551	0.238958	0.302955	0.788759	0.430253	0.517923	1931.84	FALSE
BW25113_0972	hyaA	hydrogenase 1, small subunit (NCBI)	59.5098	0.238929	0.234638	1.01829	0.308542	0.39521	1385.36	FALSE
BW25113_0201	rrsH		35093.3	0.238494	0.378478	0.630138	0.528604	0.613034	2373.43	FALSE
BW25113_0204	rrlH		291024	0.238424	0.505304	0.471842	0.637039	0.709441	2860.31	FALSE
BW25113_3979	thrT		7962.89	0.238381	0.0830028	2.87196	0.00407933	0.00836029	18.3162	FALSE
BW25113_3631	waaG	glucosyltransferase I (NCBI)	5261.59	0.238229	0.0997017	2.38942	0.0168752	0.0306685	75.7698	FALSE
BW25113_0925	ldtD	predicted carboxypeptidase (NCBI)	3509.65	0.237974	0.131188	1.814	0.0696785	0.108908	312.856	FALSE
BW25113_0776	bioF	8-amino-7-oxononanoate synthase (NCBI)	160.125	0.237695	0.216185	1.0995	0.27155	0.354726	1219.26	FALSE
BW25113_0918	kdsB		9742.1	0.237652	0.0834372	2.84827	0.00439575	0.00897182	19.7369	FALSE
BW25113_1151	beeE	e14 prophage; conserved protein (RefSeq)	9.91187	0.237376	0.824458	0.287917	0.77341	0.824014	3472.61	FALSE
BW25113_4332	yjiJ	predicted inner membrane protein (NCBI)	401.517	0.23732	0.173868	1.36494	0.172272	0.240622	773.5	FALSE
BW25113_4244	pyrI	aspartate carbamoyltransferase regulatory subunit (NCBI)	288.877	0.237232	0.177146	1.33918	0.180511	0.251658	810.493	FALSE
BW25113_2684	mprA	DNA-binding transcriptional repressor of microcin B17 synthesis and multidrug efflux (NCBI)	5118.63	0.236532	0.09967	2.37316	0.0176368	0.0318596	79.1894	FALSE
BW25113_0826	moeB	molybdopterin biosynthesis protein MoeB (NCBI)	7.43704	0.236413	0.624672	0.378459	0.70509	0.766171	3165.85	FALSE
BW25113_2951	yggS	predicted enzyme (NCBI)	2739.57	0.236374	0.0577917	4.09009	4.31198e-05	0.000124655	0.193608	FALSE
BW25113_3255	accB		31020.3	0.235861	0.14257	1.65435	0.0980568	0.147003	440.275	FALSE
BW25113_2046	wzxC	colanic acid exporter (NCBI)	285.685	0.233971	0.17658	1.32502	0.185166	0.257187	831.393	FALSE
BW25113_4418	psrD	unknown RNA (NCBI)	7870.04	0.233821	0.131975	1.7717	0.0764443	0.117918	343.235	FALSE
BW25113_1336	abgT	putative pump protein (transport) (VIMSS)	162.226	0.233355	0.191312	1.21976	0.222557	0.300455	999.281	FALSE
BW25113_2271	yfbL	putative aminopeptidase (VIMSS)	27.7004	0.233219	0.427921	0.545006	0.585749	0.663605	2630.01	FALSE
BW25113_2043	wcaM	predicted colanic acid biosynthesis protein (NCBI)	487.76	0.23306	0.119561	1.94931	0.051259	0.0831056	230.153	FALSE
BW25113_2748	ftsB		3265.86	0.231759	0.0791046	2.92978	0.00339202	0.00708463	15.2302	FALSE
BW25113_3519	treF	cytoplasmic trehalase (NCBI)	763.792	0.231725	0.0989489	2.34186	0.0191877	0.034369	86.1526	FALSE
BW25113_2158	yeiH	conserved inner membrane protein (NCBI)	987.139	0.231667	0.0900588	2.5724	0.0100997	0.0192125	45.3475	FALSE
BW25113_2537	hcaR	DNA-binding transcriptional activator of 3-phenylpropionic acid catabolism (NCBI)	1339.45	0.231531	0.649253	0.356612	0.721383	0.781222	3239.01	FALSE
BW25113_3472	dcrB	orf, hypothetical protein (VIMSS)	10395.6	0.230792	0.0955555	2.41527	0.0157236	0.0288566	70.5988	FALSE
BW25113_3844	fre	NAD(P)H-flavin reductase (NCBI)	8896.89	0.230451	0.0814231	2.83029	0.00465052	0.00945304	20.8808	FALSE
BW25113_2075	mdtB	multidrug efflux system, subunit B (NCBI)	1464.97	0.230396	0.110198	2.09075	0.0365506	0.061347	164.112	FALSE
BW25113_4622	ytcA	hypothetical protein (RefSeq)	9.51122	0.229969	0.567112	0.40551	0.685103	0.750096	3076.11	FALSE
BW25113_1988	nac	DNA-binding transcriptional dual regulator of nitrogen assimilation (NCBI)	108.09	0.2296	0.194109	1.18284	0.236872	0.315782	1063.55	FALSE
BW25113_0094	ftsA		16084.3	0.228537	0.0595337	3.83878	0.000123649	0.000330963	0.555184	FALSE
BW25113_4423	ldrC		53.9311	0.2284	0.299029	0.763805	0.444983	0.532363	1997.97	FALSE
BW25113_3937	yiiX	predicted peptidoglycan peptidase (NCBI)	883.85	0.227836	0.180938	1.25919	0.20796	0.283398	933.741	FALSE
BW25113_2448	yffQ	CPZ-55 prophage; predicted protein (RefSeq)	63.3086	0.22729	0.261897	0.86786	0.385471	0.473645	1730.76	FALSE
BW25113_1603	pntA	NAD(P) transhydrogenase subunit alpha (NCBI)	14819	0.227179	0.130794	1.73693	0.0823999	0.125934	369.976	FALSE
BW25113_1951	rcsA		832.07	0.22654	0.123817	1.82963	0.0673045	0.105566	302.197	FALSE
BW25113_3422	rtcR	sigma 54-dependent transcriptional regulator of rtcBA expression (NCBI)	432.768	0.226366	0.139637	1.6211	0.104996	0.156411	471.43	FALSE
BW25113_0882	clpA	ATPase and specificity subunit of ClpA-ClpP ATP-dependent serine protease, chaperone activity (NCBI)	30998.7	0.226022	0.148465	1.52239	0.127911	0.185667	574.319	FALSE
BW25113_1345	intR	Rac prophage; integrase (NCBI)	923.148	0.225308	0.174329	1.29243	0.196209	0.269847	880.977	FALSE
BW25113_0655	gltI	glutamate and aspartate transporter subunit (NCBI)	3753.64	0.225159	0.233994	0.962241	0.335928	0.424101	1508.32	FALSE
BW25113_2511	der		22036.6	0.225044	0.145306	1.54875	0.121441	0.177253	545.27	FALSE
BW25113_0604	dsbG	thiol:disulfide interchange protein (VIMSS)	1081.24	0.225031	0.0991081	2.27056	0.0231737	0.0406469	104.05	FALSE
BW25113_4340	yjiR	fused predicted DNA-binding transcriptional regulator/predicted aminotransferase (NCBI)	1055.64	0.224651	0.262189	0.856829	0.391539	0.479673	1758.01	FALSE
BW25113_2279	nuoK	NADH dehydrogenase subunit K (NCBI)	7548.28	0.224401	0.129692	1.73026	0.0835843	0.127507	375.294	FALSE
BW25113_0985	gfcC	hypothetical protein (NCBI)	67.1056	0.22437	0.198237	1.13183	0.257708	0.339643	1157.11	FALSE
BW25113_1218	chaC	regulatory protein for cation transport (RefSeq)	650.273	0.224314	0.14295	1.56918	0.116607	0.171202	523.565	FALSE
BW25113_3147	lpoA	hypothetical protein (NCBI)	8031.77	0.223746	0.0616405	3.62985	0.000283585	0.000713825	1.2733	FALSE
BW25113_3628	waaB	UDP-D-galactose:(glucosyl)lipopolysaccharide-1, 6-D-galactosyltransferase (RefSeq)	3822.83	0.223678	0.13383	1.67136	0.0946498	0.14254	424.978	FALSE
BW25113_2245	rhmA	predicted 2,4-dihydroxyhept-2-ene-1,7-dioic acid aldolase (NCBI)	171.514	0.223661	0.183843	1.21659	0.223761	0.301444	1004.69	FALSE
BW25113_2159	nfo	endonuclease IV (NCBI)	2762.25	0.223595	0.0697181	3.20712	0.00134069	0.00300031	6.0197	FALSE
BW25113_3083	higB	hypothetical protein (NCBI)	179.214	0.223495	0.213301	1.04779	0.294735	0.379478	1323.36	FALSE
BW25113_4101	phnG	carbon-phosphorus lyase complex subunit (NCBI)	18.304	0.222752	0.648799	0.343329	0.731351	0.790051	3283.77	FALSE
BW25113_0541	insF1		406.193	0.221152	0.123518	1.79045	0.0733817	0.113782	329.484	FALSE
BW25113_1872	torZ	biotin sulfoxide reductase 2 (VIMSS)	480.173	0.220513	0.105723	2.08576	0.0370004	0.0619624	166.132	FALSE
BW25113_0078	ilvH	acetolactate synthase small subunit (NCBI)	299.623	0.220395	0.245477	0.897825	0.369279	0.457712	1658.06	FALSE
BW25113_0800	ybiB	hypothetical protein (NCBI)	2775.08	0.220153	0.108045	2.0376	0.0415896	0.068748	186.737	FALSE
BW25113_4599	yneM		1570.42	0.219938	0.177598	1.2384	0.215566	0.292428	967.893	FALSE
BW25113_1540	rspR	predicted DNA-binding transcriptional regulator (NCBI)	2340.37	0.219903	0.109265	2.01257	0.0441601	0.0726485	198.279	FALSE
BW25113_2457	eutM	detox protein (VIMSS)	90.9777	0.219478	0.268112	0.818605	0.413012	0.500397	1854.42	FALSE
BW25113_0443	fadM	hypothetical protein (NCBI)	184.959	0.218795	0.240436	0.909993	0.362826	0.450815	1629.09	FALSE
BW25113_1655	mepH	predicted lipoprotein (NCBI)	1665.61	0.21844	0.135009	1.61796	0.10567	0.157363	474.459	FALSE
BW25113_2576	srmB	ATP-dependent RNA helicase (NCBI)	9020.67	0.217909	0.165157	1.3194	0.187034	0.258979	839.784	FALSE
BW25113_0104	guaC	guanosine 5'-monophosphate oxidoreductase (NCBI)	7625.08	0.21782	0.139467	1.56181	0.118333	0.173225	531.316	FALSE
BW25113_0637	rsfS		4676	0.217515	0.157904	1.37751	0.168353	0.235884	755.906	FALSE
BW25113_2059	wcaA	predicted glycosyl transferase (NCBI)	338.928	0.217062	0.208926	1.03894	0.298832	0.3842	1341.75	FALSE
BW25113_3968	rrsB		38093.4	0.216846	0.377222	0.57485	0.565393	0.645844	2538.61	FALSE
BW25113_4462	ygaQ		47.8589	0.216392	0.451052	0.47975	0.631405	0.704744	2835.01	FALSE
BW25113_1059	solA	N-methyltryptophan oxidase, FAD-binding (NCBI)	3962.34	0.216	0.121202	1.78215	0.0747252	0.115505	335.516	FALSE
BW25113_4656	yjhY		381.534	0.215515	0.181927	1.18463	0.236164	0.314933	1060.38	FALSE
BW25113_1908	yecA	conserved metal-binding protein (NCBI)	4744.94	0.215467	0.0949796	2.26856	0.0232952	0.0408121	104.595	FALSE
BW25113_2017	yefM	orf, hypothetical protein (VIMSS)	1418.47	0.215456	0.092187	2.33716	0.0194308	0.0347488	87.2443	FALSE
BW25113_1758	ynjF	putative cytochrome oxidase (VIMSS)	314.782	0.215176	0.133732	1.60902	0.107612	0.159548	483.179	FALSE
BW25113_1341	ydaM	orf, hypothetical protein (VIMSS)	242.249	0.213904	0.182939	1.16927	0.242297	0.32196	1087.91	FALSE
BW25113_4263	yjgR	predicted ATPase (NCBI)	825.825	0.213816	0.123736	1.72801	0.0839872	0.12801	377.102	FALSE
BW25113_1742	ves	orf, hypothetical protein (VIMSS)	73.8265	0.213703	0.230927	0.925414	0.35475	0.442854	1592.83	FALSE
BW25113_2771	ygcS	putative transport protein (VIMSS)	57.2956	0.213476	0.312009	0.684198	0.49385	0.578917	2217.39	FALSE
BW25113_4051	qorA	quinone oxidoreductase, NADPH-dependent (NCBI)	1634.82	0.212934	0.160766	1.3245	0.185338	0.257267	832.166	FALSE
BW25113_1028	ymdE	orf, hypothetical protein (VIMSS)	10.4841	0.2126	0.522199	0.407125	0.683916	0.749346	3070.78	FALSE
BW25113_0938	elfA	putative fimbrial-like protein (VIMSS)	82.3678	0.212527	0.221239	0.960625	0.336741	0.424887	1511.97	FALSE
BW25113_0305	rclR	predicted DNA-binding transcriptional regulator (NCBI)	179.479	0.211446	0.1593	1.32734	0.184395	0.256355	827.933	FALSE
BW25113_0340	cynS	cyanate hydratase (NCBI)	85.1128	0.211215	0.250729	0.842401	0.399564	0.48687	1794.04	FALSE
BW25113_1120	cobB	deacetylase of acs and cheY, regulates chemotaxis (NCBI)	3024.53	0.210659	0.0796757	2.64395	0.00819448	0.0159197	36.7932	FALSE
BW25113_1855	lpxM	lipid A biosynthesis (KDO)2-(lauroyl)-lipid IVA acyltransferase (NCBI)	4955.27	0.210065	0.0806948	2.60321	0.00923563	0.017727	41.468	FALSE
BW25113_0458	ylaC	orf, hypothetical protein (VIMSS)	5162.99	0.209671	0.104556	2.00535	0.0449262	0.0736651	201.718	FALSE
BW25113_4346	mcrB	component of McrBC 5-methylcytosine restriction system (VIMSS)	2187.29	0.209609	0.152153	1.37762	0.168321	0.235884	755.761	FALSE
BW25113_1547	stfQ	Qin prophage; predicted side tail fibre assembly protein (NCBI)	61.8207	0.209159	0.222346	0.940689	0.346864	0.434964	1557.42	FALSE
BW25113_1866	aspS		39777.3	0.208682	0.0694145	3.00632	0.0026443	0.00564404	11.8729	FALSE
BW25113_0880	cspD	cold shock protein homolog (NCBI)	5213.01	0.208605	0.194852	1.07058	0.284358	0.368128	1276.77	FALSE
BW25113_2275	yfbP	TPR-like repeats-containing protein (NCBI)	524.775	0.208138	0.123536	1.68484	0.09202	0.138836	413.17	FALSE
BW25113_1534	ydeE	predicted transporter (NCBI)	683.106	0.207199	0.176272	1.17545	0.239814	0.319235	1076.76	FALSE
BW25113_2621	ssrA		756593	0.20704	0.0555549	3.72676	0.000193957	0.000503209	0.870866	FALSE
BW25113_0779	uvrB	excinuclease ABC subunit B (NCBI)	4778.54	0.206977	0.101619	2.03679	0.0416707	0.0688059	187.102	FALSE
BW25113_2793	syd	SecY interacting protein Syd (NCBI)	1590.42	0.206855	0.076456	2.70555	0.00681921	0.0134522	30.6182	FALSE
BW25113_2540	hcaC	3-phenylpropionate dioxygenase, predicted ferredoxin subunit (NCBI)	55.5638	0.206845	0.284985	0.725809	0.467956	0.555248	2101.12	FALSE
BW25113_4557	yidD	hypothetical protein (NCBI)	9057.83	0.206026	0.18186	1.13288	0.257265	0.339332	1155.12	FALSE
BW25113_2949	yqgF		1905.53	0.205878	0.112425	1.83125	0.0670632	0.105298	301.114	FALSE
BW25113_1046	clsC	putative synthase (VIMSS)	862.705	0.205415	0.110876	1.85266	0.0639314	0.101124	287.052	FALSE
BW25113_3930	menA	1,4-dihydroxy-2-naphthoate octaprenyltransferase (NCBI)	2575.1	0.205415	0.111705	1.83891	0.0659285	0.103844	296.019	FALSE
BW25113_3195	mlaF	predicted toluene transporter subunit: ATP-binding component of ABC superfamily (NCBI)	11215.7	0.205187	0.0699715	2.93244	0.00336307	0.00703331	15.1002	FALSE
BW25113_2561	yfhH	orf, hypothetical protein (VIMSS)	1806.4	0.205042	0.105674	1.94032	0.052341	0.0846454	235.011	FALSE
BW25113_1771	ydjG	predicted oxidoreductase (NCBI)	331.082	0.205005	0.148437	1.38109	0.167252	0.234709	750.963	FALSE
BW25113_3407	yhgF	orf, hypothetical protein (VIMSS)	12904.4	0.204799	0.0906371	2.25955	0.0238493	0.0416688	107.083	FALSE
BW25113_2216	rcsD	phosphotransfer intermediate protein in two-component regulatory system with RcsBC (NCBI)	12569.3	0.204746	0.0493093	4.15229	3.29168e-05	9.69747e-05	0.147797	FALSE
BW25113_2193	narP	DNA-binding response regulator in two-component regulatory system with NarQ or NarX (NCBI)	2566.67	0.204627	0.0928161	2.20465	0.0274788	0.0474548	123.38	FALSE
BW25113_3630	waaP	kinase that phosphorylates core heptose of lipopolysaccharide (NCBI)	3645.08	0.204286	0.106022	1.92682	0.0540024	0.0870277	242.471	FALSE
BW25113_2285	nuoE	NADH dehydrogenase subunit E (NCBI)	17342.6	0.203842	0.122978	1.65755	0.0974086	0.146167	437.365	FALSE
BW25113_2617	bamE	small membrane protein A (VIMSS)	6119.25	0.203756	0.078109	2.60861	0.00909117	0.0174647	40.8194	FALSE
BW25113_2507	guaA		34676.8	0.203715	0.0988764	2.0603	0.03937	0.0655873	176.771	FALSE
BW25113_2595	bamD		14008.1	0.203439	0.0516995	3.93502	8.31886e-05	0.00022882	0.373517	FALSE
BW25113_0809	glnQ	glutamine ABC transporter ATP-binding protein (NCBI)	2559.14	0.203313	0.164428	1.23649	0.216277	0.293126	971.084	FALSE
BW25113_3192	mlaC	predicted ABC-type organic solvent transporter (NCBI)	11690.9	0.203002	0.073635	2.75687	0.00583575	0.0116507	26.2025	FALSE
BW25113_1121	ycfZ		286.134	0.202987	0.211548	0.959528	0.337293	0.425292	1514.44	FALSE
BW25113_1970	hiuH	hypothetical protein (NCBI)	58.3349	0.202985	0.254865	0.796443	0.425775	0.513084	1911.73	FALSE
BW25113_3643	rph	ribonuclease PH (NCBI)	4756.96	0.20266	0.181033	1.11946	0.262943	0.345358	1180.62	FALSE
BW25113_1260	trpA	tryptophan synthase subunit alpha (NCBI)	8.88886	0.201535	0.527695	0.381915	0.702524	0.764125	3154.33	FALSE
BW25113_1464	yddE	hypothetical protein (NCBI)	1366.72	0.201423	0.096588	2.08538	0.0370344	0.0619963	166.284	FALSE
BW25113_3193	mlaD	predicted ABC-type organic solvent transporter (NCBI)	8794.89	0.201385	0.0695506	2.89552	0.00378536	0.00782226	16.9963	FALSE
BW25113_1232	purU	formyltetrahydrofolate deformylase (NCBI)	5314.79	0.201322	0.0869861	2.31442	0.0206449	0.0366856	92.6955	FALSE
BW25113_0433	ampG	muropeptide transporter (NCBI)	5172.64	0.20075	0.161981	1.23934	0.21522	0.292046	966.336	FALSE
BW25113_2280	nuoJ	NADH dehydrogenase subunit J (NCBI)	15033.5	0.200376	0.131155	1.52778	0.126568	0.184077	568.292	FALSE
BW25113_2281	nuoI	NADH dehydrogenase subunit I (NCBI)	16075.5	0.200086	0.127714	1.56667	0.117192	0.171779	526.192	FALSE
BW25113_3071	yqjI	predicted transcriptional regulator (NCBI)	1640.41	0.199883	0.0930687	2.14769	0.0317381	0.0539777	142.504	FALSE
BW25113_3747	kup	potassium transporter (NCBI)	3266.79	0.199858	0.140181	1.42572	0.15395	0.217933	691.234	FALSE
BW25113_3125	garR	tartronate semialdehyde reductase (RefSeq)	322.318	0.199282	0.207826	0.958888	0.337615	0.425292	1515.89	FALSE
BW25113_1126	potA	putrescine/spermidine ABC transporter ATPase protein (NCBI)	11229.3	0.198517	0.167001	1.18872	0.234549	0.313152	1053.12	FALSE
BW25113_3180	yhbY	predicted RNA-binding protein (NCBI)	9990.5	0.197407	0.119105	1.65742	0.0974339	0.146167	437.478	FALSE
BW25113_2375	yfdX	hypothetical protein (NCBI)	45.5755	0.196968	0.317035	0.62128	0.534415	0.618215	2399.52	FALSE
BW25113_2505	yfgH	predicted outer membrane lipoprotein (NCBI)	63.447	0.196463	0.227615	0.863136	0.388062	0.476225	1742.4	FALSE
BW25113_2946	rsmE	orf, hypothetical protein (VIMSS)	2549.03	0.196326	0.0726022	2.70414	0.00684818	0.0135034	30.7483	FALSE
BW25113_4648	ysaC		8.97057	0.19607	0.66691	0.293998	0.76876	0.820659	3451.73	FALSE
BW25113_0913	ycaI	orf, hypothetical protein (VIMSS)	625.275	0.195771	0.155151	1.26181	0.207018	0.282458	929.51	FALSE
BW25113_2085	yegR	orf, hypothetical protein (VIMSS)	27.4166	0.195399	0.399476	0.489139	0.624743	0.698876	2805.1	FALSE
BW25113_1681	sufD	component of SufBCD complex (NCBI)	1426.14	0.194468	0.0943028	2.06217	0.0391919	0.065315	175.972	FALSE
BW25113_0692	potE	putrescine/proton symporter: putrescine/ornithine antiporter (NCBI)	225.895	0.194078	0.197482	0.982761	0.325725	0.413083	1462.51	FALSE
BW25113_0463	acrA	multidrug efflux system (NCBI)	17038.4	0.193823	0.0686876	2.8218	0.00477545	0.00968938	21.4418	FALSE
BW25113_2282	nuoH	NADH dehydrogenase subunit H (NCBI)	22321.7	0.193389	0.116128	1.66532	0.0958499	0.144032	430.366	FALSE
BW25113_2781	mazG	nucleoside triphosphate pyrophosphohydrolase (NCBI)	2273.37	0.193299	0.0976236	1.98004	0.047699	0.0778956	214.169	FALSE
BW25113_3803	hemX	predicted uroporphyrinogen III methylase (NCBI)	7580.13	0.192793	0.0658966	2.92569	0.00343688	0.0071683	15.4316	FALSE
BW25113_2284	nuoF	NADH:ubiquinone oxidoreductase, chain F (NCBI)	44203.2	0.192731	0.126321	1.52572	0.127079	0.184592	570.586	FALSE
BW25113_3957	argE	acetylornithine deacetylase (NCBI)	1882.31	0.191914	0.163443	1.1742	0.240316	0.319612	1079.02	FALSE
BW25113_4075	nrfF	heme lyase (NrfEFG) for insertion of heme into c552, subunit NrfF (NCBI)	37.1519	0.191809	0.320898	0.597725	0.550024	0.632513	2469.61	FALSE
BW25113_2189	proL	tRNA-Pro (NCBI)	126.625	0.191453	0.192944	0.992275	0.321064	0.407633	1441.58	FALSE
BW25113_2278	nuoL	NADH dehydrogenase subunit L (NCBI)	36719.3	0.191228	0.136632	1.39959	0.161638	0.227829	725.753	FALSE
BW25113_0489	qmcA	predicted protease, membrane anchored (NCBI)	1799.63	0.191219	0.106049	1.80312	0.07137	0.11097	320.451	FALSE
BW25113_2545	yphC	putative oxidoreductase (VIMSS)	248.436	0.189926	0.124883	1.52083	0.128303	0.186116	576.08	FALSE
BW25113_0154	hemL		16457.5	0.18981	0.0612491	3.09899	0.0019418	0.00424993	8.71867	FALSE
BW25113_2574	nadB	L-aspartate oxidase (NCBI)	594.468	0.189721	0.0968095	1.95974	0.0500265	0.0813134	224.619	FALSE
BW25113_3390	aroK	shikimate kinase I (NCBI)	17679.3	0.189565	0.141741	1.3374	0.181091	0.252154	813.101	FALSE
BW25113_2329	aroC	chorismate synthase (NCBI)	7186.39	0.188115	0.0641231	2.93366	0.00334995	0.00700985	15.0413	FALSE
BW25113_3387	dam	DNA adenine methylase (NCBI)	5338.21	0.18811	0.0673633	2.79247	0.00523067	0.0105604	23.4857	FALSE
BW25113_4670	yjeV		14.3933	0.187895	0.567221	0.331255	0.740452	0.797053	3324.63	FALSE
BW25113_0434	yajG	putative polymerase/proteinase (VIMSS)	8548.3	0.187448	0.11448	1.63738	0.101551	0.151733	455.963	FALSE
BW25113_2379	alaC	hypothetical protein (NCBI)	2203.02	0.187428	0.18291	1.0247	0.305503	0.391765	1371.71	FALSE
BW25113_1269	rluB	23S rRNA pseudouridylate synthase (NCBI)	15670.9	0.186875	0.121999	1.53177	0.125579	0.182756	563.848	FALSE
BW25113_3084	rlmG	putative enzyme (VIMSS)	2335.96	0.186835	0.224312	0.832925	0.404887	0.491884	1817.94	FALSE
BW25113_2699	recA		27603.9	0.186663	0.0942625	1.98024	0.0476761	0.077889	214.066	FALSE
BW25113_0142	folK		1279.3	0.185895	0.216762	0.8576	0.391114	0.479312	1756.1	FALSE
BW25113_4616	istR		21.979	0.18588	0.483683	0.384302	0.700755	0.763499	3146.39	FALSE
BW25113_3730	glmU		26467.3	0.185703	0.0946049	1.96294	0.0496535	0.0807365	222.944	FALSE
BW25113_0435	bolA	possible regulator of murein genes (VIMSS)	2633	0.185615	0.117178	1.58404	0.113185	0.166684	508.2	FALSE
BW25113_0339	cynT	carbonic anhydrase (NCBI)	104.173	0.185264	0.216308	0.856486	0.391729	0.479673	1758.86	FALSE
BW25113_0933	ssuB	alkanesulfonate transporter subunit (NCBI)	242.344	0.184835	0.162946	1.13433	0.256655	0.338832	1152.38	FALSE
BW25113_1446	ydcY	hypothetical protein (NCBI)	2391.28	0.184702	0.08043	2.29643	0.0216511	0.0383216	97.2135	FALSE
BW25113_3334	gspM	putative general secretion (VIMSS)	9.10843	0.183889	0.52887	0.347702	0.728064	0.787505	3269.01	FALSE
BW25113_4628	ykfK		23.8055	0.183636	0.434683	0.42246	0.672689	0.740848	3020.37	FALSE
BW25113_4543	ypaA	predicted protein (NCBI)	336.519	0.183533	0.138212	1.3279	0.18421	0.256178	827.104	FALSE
BW25113_1656	sodB	superoxide dismutase, Fe (NCBI)	22904.2	0.183368	0.0946774	1.93676	0.0527744	0.0852231	236.957	FALSE
BW25113_2942	metK		18094.1	0.182203	0.121449	1.50024	0.133552	0.193042	599.647	FALSE
BW25113_3282	tsaC		3907.1	0.181975	0.116091	1.56752	0.116993	0.1716	525.297	FALSE
BW25113_2669	stpA	DNA binding protein, nucleoid-associated (NCBI)	650.258	0.181226	0.227398	0.796957	0.425476	0.512862	1910.39	FALSE
BW25113_0884	infA		14584.6	0.181173	0.166036	1.09116	0.275201	0.358658	1235.65	FALSE
BW25113_2438	eutK	orf, hypothetical protein (VIMSS)	279.244	0.179779	0.12371	1.45323	0.14616	0.208109	656.258	FALSE
BW25113_1881	cheZ	chemotaxis regulator, protein phosphatase for CheY (NCBI)	158.864	0.178444	0.191541	0.931622	0.351532	0.439464	1578.38	FALSE
BW25113_1709	btuD		6.4376	0.178111	0.749704	0.237575	0.812211	0.854979	3646.83	FALSE
BW25113_2571	rseB	periplasmic negative regulator of sigmaE (NCBI)	99.5958	0.178026	0.2996	0.594213	0.552369	0.634722	2480.14	FALSE
BW25113_1178	pliG	hypothetical protein (NCBI)	433.026	0.177903	0.136103	1.30712	0.191171	0.26381	858.359	FALSE
BW25113_3938	metJ		3324.24	0.176705	0.102068	1.73124	0.0834091	0.127346	374.507	FALSE
BW25113_3069	ileX		32.2286	0.176579	0.327606	0.538997	0.589889	0.668063	2648.6	FALSE
BW25113_4159	mscM	predicted mechanosensitive channel (NCBI)	5434.19	0.17563	0.0740998	2.37018	0.0177796	0.0321037	79.8304	FALSE
BW25113_2779	eno		110749	0.175308	0.0715917	2.44872	0.0143364	0.0265722	64.3705	FALSE
BW25113_2348	argW		15.7049	0.174808	0.478843	0.365063	0.715064	0.775129	3210.64	FALSE
BW25113_2132	bglX	beta-D-glucoside glucohydrolase, periplasmic (NCBI)	7748.98	0.174693	0.0893401	1.95537	0.0505392	0.081998	226.921	FALSE
BW25113_0532	sfmD	predicted outer membrane export usher protein (NCBI)	146.81	0.174532	0.240801	0.724798	0.468576	0.555745	2103.91	FALSE
BW25113_2303	folX	D-erythro-7,8-dihydroneopterin triphosphate 2'-epimerase and dihydroneopterin aldolase (NCBI)	3897.03	0.174314	0.0906667	1.92258	0.0545329	0.0876834	244.853	FALSE
BW25113_1410	ynbC	predicted hydrolase (NCBI)	198.547	0.173833	0.217682	0.798562	0.424544	0.511876	1906.2	FALSE
BW25113_3802	hemY	predicted protoheme IX synthesis protein (NCBI)	7740.33	0.173713	0.061413	2.8286	0.00467522	0.00949892	20.9917	FALSE
BW25113_1573	ydfC	Qin prophage; predicted protein (RefSeq)	62.882	0.173315	0.233422	0.742495	0.457788	0.545205	2055.47	FALSE
BW25113_2224	atoB	acetyl-CoA acetyltransferase (NCBI)	99.979	0.172535	0.292254	0.590361	0.554948	0.636705	2491.72	FALSE
BW25113_3649	rpoZ	DNA-directed RNA polymerase subunit omega (NCBI)	14975	0.17239	0.0794774	2.16904	0.0300795	0.0514107	135.057	FALSE
BW25113_2255	arnA	hypothetical protein (NCBI)	4107.94	0.171995	0.144662	1.18894	0.234462	0.313152	1052.73	FALSE
BW25113_0197	metQ	DL-methionine transporter subunit (NCBI)	7335.75	0.171872	0.0753885	2.27981	0.0226189	0.0398105	101.559	FALSE
BW25113_2244	yfaD	hypothetical protein (NCBI)	483.716	0.171823	0.159493	1.07731	0.281342	0.365068	1263.23	FALSE
BW25113_4496	yedS		295.454	0.17182	0.165097	1.04072	0.298006	0.383359	1338.05	FALSE
BW25113_1212	prmC		2384.11	0.171594	0.131388	1.30601	0.191549	0.264088	860.056	FALSE
BW25113_0624	flc	camphor resistance protein CrcB (NCBI)	759.065	0.171506	0.108572	1.57965	0.114187	0.16798	512.7	FALSE
BW25113_2812	tcdA	hypothetical protein (NCBI)	3354.49	0.170866	0.0853628	2.00164	0.0453232	0.0742075	203.501	FALSE
BW25113_0149	mrcB	penicillin-binding protein 1b (NCBI)	9343.19	0.170598	0.0735853	2.31836	0.0204296	0.0363806	91.7287	FALSE
BW25113_2469	narQ	sensory histidine kinase in two-component regulatory system with NarP (NarL) (NCBI)	703.741	0.170588	0.102736	1.66045	0.096824	0.145398	434.74	FALSE
BW25113_1579	intQ	Qin prophage; predicted defective integrase (RefSeq)	84.9972	0.169555	0.234466	0.723157	0.469583	0.55603	2108.43	FALSE
BW25113_3781	trxA	thioredoxin 1 (VIMSS)	20676.3	0.169171	0.0701558	2.41136	0.0158932	0.0291083	71.3606	FALSE
BW25113_2863	ygeQ	orf, hypothetical protein (VIMSS)	581.403	0.168809	0.131757	1.28122	0.200117	0.274464	898.526	FALSE
BW25113_2286	nuoC	NADH:ubiquinone oxidoreductase, chain C,D (RefSeq)	58070.9	0.168167	0.171029	0.983264	0.325478	0.412886	1461.39	FALSE
BW25113_4208	cycA	D-alanine/D-serine/glycine transporter (NCBI)	5556.99	0.167573	0.332919	0.503347	0.614721	0.690597	2760.1	FALSE
BW25113_4100	phnH	carbon-phosphorus lyase complex subunit (NCBI)	39.4995	0.167459	0.268018	0.624807	0.532098	0.616171	2389.12	FALSE
BW25113_0344	lacZ	beta-D-galactosidase (NCBI)	42.9144	0.166622	0.338555	0.492155	0.62261	0.697569	2795.52	FALSE
BW25113_2417	crr		42060.7	0.166474	0.0855761	1.94533	0.0517356	0.0838176	232.293	FALSE
BW25113_0194	proS		40667.7	0.166352	0.078473	2.11986	0.034018	0.0573973	152.741	FALSE
BW25113_3057	bacA	undecaprenyl pyrophosphate phosphatase (NCBI)	4007.05	0.165449	0.0644643	2.56652	0.0102726	0.0195166	46.1239	FALSE
BW25113_2449	yffR	CPZ-55 prophage; predicted protein (NCBI)	210.821	0.165174	0.175236	0.942579	0.345896	0.434115	1553.07	FALSE
BW25113_1636	pdxY	pyridoxine kinase (NCBI)	5452.31	0.164504	0.0729495	2.25505	0.0241304	0.0420779	108.346	FALSE
BW25113_4007	rrsE		28737.6	0.164339	0.498627	0.329583	0.741715	0.79803	3330.3	FALSE
BW25113_0324	yahJ	deaminase (NCBI)	727.961	0.164252	0.0966866	1.69881	0.0893557	0.135226	401.207	FALSE
BW25113_0794	ybhF	putative ATP-binding component of a transport system (VIMSS)	1620.29	0.164126	0.164378	0.998468	0.318052	0.404613	1428.06	FALSE
BW25113_2821	ptrA	protease III (NCBI)	6200.14	0.164105	0.0669506	2.45114	0.0142406	0.0264165	63.9402	FALSE
BW25113_1552	cspI		40.0735	0.164087	0.341284	0.480793	0.630664	0.704092	2831.68	FALSE
BW25113_3851	rrsA		31651.2	0.163857	0.378606	0.432789	0.665168	0.733651	2986.6	FALSE
BW25113_0055	djlA	Dna-J like membrane chaperone protein (NCBI)	2087.31	0.163501	0.0920046	1.77709	0.0755527	0.116664	339.232	FALSE
BW25113_1018	efeO	hypothetical protein (NCBI)	4857.74	0.163483	0.15362	1.0642	0.287238	0.371105	1289.7	FALSE
BW25113_3096	mzrA	hypothetical protein (NCBI)	1474.41	0.163267	0.0899208	1.81568	0.0694197	0.108579	311.694	FALSE
BW25113_3392	hofP	orf, hypothetical protein (VIMSS)	45.9674	0.162993	0.261001	0.624493	0.532304	0.616251	2390.05	FALSE
BW25113_0536	argU		56.5756	0.162856	0.344388	0.472884	0.636296	0.708789	2856.97	FALSE
BW25113_3970	rrlB		300559	0.162652	0.504	0.322723	0.746905	0.802264	3353.6	FALSE
BW25113_3982	nusG		39480.1	0.162648	0.11269	1.44331	0.148932	0.211518	668.704	FALSE
BW25113_3725	pstB		3377.54	0.161875	0.139347	1.16167	0.245369	0.325463	1101.71	FALSE
BW25113_0108	ppdD	predicted major pilin subunit (NCBI)	35.5944	0.161496	0.33418	0.48326	0.628911	0.70266	2823.81	FALSE
BW25113_2500	purN	phosphoribosylglycinamide formyltransferase (NCBI)	1837.1	0.160964	0.0912163	1.76464	0.0776247	0.119533	348.535	FALSE
BW25113_1958	yedI	conserved inner membrane protein (NCBI)	2512.08	0.16062	0.101412	1.58383	0.113232	0.166684	508.41	FALSE
BW25113_3061	ttdA	tartrate dehydratase (NCBI)	41.713	0.160431	0.574181	0.279409	0.779931	0.828989	3501.89	FALSE
BW25113_0480	ushA	UDP-sugar hydrolase (NCBI)	4116.38	0.159658	0.0966299	1.65226	0.0984814	0.14752	442.181	FALSE
BW25113_4441	glmY	sRNA activator of glmS mRNA (RefSeq)	131.23	0.159511	0.194689	0.819311	0.412609	0.500044	1852.61	FALSE
BW25113_2755	ygbT	hypothetical protein (NCBI)	276.184	0.158839	0.182885	0.868521	0.385109	0.473509	1729.14	FALSE
BW25113_1327	ycjY	predicted hydrolase (RefSeq)	157.481	0.157964	0.218068	0.724379	0.468833	0.555751	2105.06	FALSE
BW25113_2747	ispD		4240.26	0.156685	0.0694296	2.25675	0.024024	0.0419086	107.868	FALSE
BW25113_3764	yifE	hypothetical protein (NCBI)	7979.87	0.156422	0.0922723	1.69522	0.0900334	0.13616	404.25	FALSE
BW25113_1436	yncJ		112.667	0.155912	0.198764	0.784411	0.432799	0.520568	1943.27	FALSE
BW25113_3699	gyrB		40667.7	0.155632	0.0745253	2.08831	0.03677	0.0616458	165.097	FALSE
BW25113_0217	yafT	predicted aminopeptidase (NCBI)	257.884	0.1556	0.173908	0.894727	0.370933	0.459358	1665.49	FALSE
BW25113_1374	pinR		153.072	0.155323	0.156144	0.994742	0.319862	0.406653	1436.18	FALSE
BW25113_2948	yqgE	orf, hypothetical protein (VIMSS)	3813.65	0.155175	0.0851032	1.82337	0.068247	0.106782	306.429	FALSE
BW25113_1357	ydaS	Rac prophage; predicted DNA-binding transcriptional regulator (NCBI)	50.2876	0.155122	0.223222	0.694921	0.487105	0.573544	2187.1	FALSE
BW25113_3958	argC	N-acetyl-gamma-glutamyl-phosphate reductase (NCBI)	433.227	0.154931	0.144022	1.07575	0.28204	0.365656	1266.36	FALSE
BW25113_3200	lptA		6456.98	0.154708	0.0845367	1.83007	0.0672398	0.105538	301.907	FALSE
BW25113_3275	rrlD		302599	0.153977	0.519488	0.296402	0.766923	0.819442	3443.49	FALSE
BW25113_2232	ubiG		3477.49	0.15392	0.0831718	1.85063	0.0642235	0.101515	288.363	FALSE
BW25113_2568	lepB		18068.5	0.153788	0.105766	1.45405	0.145933	0.207853	655.24	FALSE
BW25113_3267	yhdV	predicted outer membrane protein (NCBI)	61.3053	0.153623	0.224656	0.683812	0.494094	0.57905	2218.48	FALSE
BW25113_2778	ygcG	orf, hypothetical protein (VIMSS)	68.7301	0.153339	0.244776	0.626447	0.531022	0.615243	2384.29	FALSE
BW25113_3201	lptB		6423.32	0.152958	0.052399	2.91909	0.00351051	0.00730826	15.7622	FALSE
BW25113_0479	fsr	predicted fosmidomycin efflux system (NCBI)	1248.42	0.152784	0.125016	1.22211	0.221665	0.299368	995.278	FALSE
BW25113_0185	accA		29645.3	0.152747	0.0854656	1.78723	0.0739	0.114507	331.811	FALSE
BW25113_4662	sgrT		52.7613	0.152606	0.29885	0.510643	0.609601	0.686222	2737.11	FALSE
BW25113_2749	ygbE	conserved inner membrane protein (NCBI)	118248	0.152523	0.15229	1.00153	0.31657	0.40353	1421.4	FALSE
BW25113_3888	yiiD	predicted acetyltransferase (NCBI)	2485.16	0.151835	0.180086	0.843123	0.39916	0.486642	1792.23	FALSE
BW25113_3427	yzgL	orf, hypothetical protein (VIMSS)	1737.17	0.151624	0.137214	1.10502	0.26915	0.352001	1208.48	FALSE
BW25113_2122	yehQ	orf, hypothetical protein (VIMSS)	208.078	0.151137	0.168344	0.89779	0.369297	0.457712	1658.15	FALSE
BW25113_4254	argI	ornithine carbamoyltransferase 1 (NCBI)	134.243	0.150965	0.184548	0.818025	0.413343	0.500663	1855.91	FALSE
BW25113_3700	recF	recombination protein F (NCBI)	16.5701	0.150647	0.384548	0.391749	0.695243	0.758786	3121.64	FALSE
BW25113_0212	gloB	predicted hydroxyacylglutathione hydrolase (NCBI)	936.223	0.150005	0.092293	1.62531	0.104096	0.155276	467.389	FALSE
BW25113_2986	yghT	predicted protein with nucleoside triphosphate hydrolase domain (NCBI)	34.9618	0.149976	0.357944	0.418992	0.675222	0.743275	3031.75	FALSE
BW25113_2283	nuoG	NADH:ubiquinone oxidoreductase, chain G (RefSeq)	72308.9	0.149661	0.104404	1.43348	0.151721	0.215138	681.226	FALSE
BW25113_1350	recE	Rac prophage; exonuclease VIII, 5' -> 3' specific dsDNA exonuclease (NCBI)	263.134	0.149567	0.79176	0.188904	0.850168	0.888253	3817.25	FALSE
BW25113_3758	rrlC		372169	0.149541	0.506088	0.295484	0.767625	0.819996	3446.63	FALSE
BW25113_3627	waaR	UDP-D-galactose:(glucosyl)lipopolysaccharide- alpha-1,3-D-galactosyltransferase (NCBI)	16.9282	0.148853	0.385935	0.385695	0.699722	0.762789	3141.75	FALSE
BW25113_4009	rrlE		244890	0.147391	0.507196	0.290599	0.771358	0.822807	3463.4	FALSE
BW25113_2589	rrlG		327506	0.147173	0.515113	0.28571	0.7751	0.825618	3480.2	FALSE
BW25113_1862	yebB	orf, hypothetical protein (VIMSS)	79.5877	0.146767	0.239842	0.611931	0.540583	0.624061	2427.22	FALSE
BW25113_0053	surA	peptidyl-prolyl cis-trans isomerase (PPIase) (NCBI)	26592.5	0.146685	0.0606568	2.41828	0.0155941	0.0286424	70.0173	FALSE
BW25113_0421	ispA		8348.74	0.145591	0.1288	1.13036	0.258325	0.340229	1159.88	FALSE
BW25113_0608	ybdR	predicted oxidoreductase, Zn-dependent and NAD(P)-binding (NCBI)	360.684	0.145363	0.128149	1.13432	0.256659	0.338832	1152.4	FALSE
BW25113_1804	rnd	ribonuclease D (NCBI)	4135.87	0.145054	0.163492	0.887222	0.374959	0.463191	1683.57	FALSE
BW25113_2864	glyU		59.4168	0.144722	0.26918	0.537639	0.590826	0.668786	2652.81	FALSE
BW25113_3035	tolC	outer membrane channel; specific tolerance to colicin E1; segregation of daughter chromosomes (VIMSS)	35837.5	0.144538	0.0718744	2.01098	0.0443275	0.0728513	199.031	FALSE
BW25113_4328	iadA	isoaspartyl dipeptidase (NCBI)	4015.53	0.144473	0.0639548	2.25898	0.0238845	0.0417141	107.242	FALSE
BW25113_3756	rrsC		27463.2	0.143386	0.512819	0.279604	0.779781	0.828989	3501.22	FALSE
BW25113_1412	azoR	acyl carrier protein phosphodiesterase (NCBI)	1177.69	0.143309	0.100629	1.42414	0.154407	0.218325	693.289	FALSE
BW25113_3854	rrlA		320995	0.142052	0.5178	0.274337	0.783825	0.831944	3519.38	FALSE
BW25113_1122	ymfA	orf, hypothetical protein (VIMSS)	321.921	0.141643	0.234898	0.602997	0.54651	0.629119	2453.83	FALSE
BW25113_4052	dnaB		10357	0.141435	0.0868197	1.62906	0.103299	0.154243	463.814	FALSE
BW25113_0125	hpt	hypoxanthine phosphoribosyltransferase (VIMSS)	12680.8	0.141419	0.0590516	2.39483	0.016628	0.0303105	74.6595	FALSE
BW25113_2494	bepA	predicted peptidase (NCBI)	3783.61	0.140985	0.149819	0.941037	0.346686	0.434863	1556.62	FALSE
BW25113_0601	ybdM	hypothetical protein (NCBI)	216.513	0.14053	0.129514	1.08505	0.277899	0.361181	1247.77	FALSE
BW25113_0420	dxs		12539.9	0.140227	0.140868	0.99545	0.319518	0.406362	1434.63	FALSE
BW25113_0379	yaiY	predicted inner membrane protein (NCBI)	279.664	0.139636	0.196907	0.709146	0.478234	0.564306	2147.27	FALSE
BW25113_3151	yraQ	predicted permease (NCBI)	2919.56	0.138649	0.187148	0.740852	0.458783	0.546058	2059.94	FALSE
BW25113_1058	yceO		16.1958	0.13863	0.44168	0.31387	0.75362	0.808314	3383.75	FALSE
BW25113_2209	eco	ecotin precursor (NCBI)	7885.68	0.138557	0.0948992	1.46005	0.144278	0.20595	647.807	FALSE
BW25113_3033	yqiB	predicted dehydrogenase (NCBI)	2626.31	0.137836	0.0766458	1.79835	0.0721212	0.112061	323.824	FALSE
BW25113_2786	barA	hybrid sensory histidine kinase, in two-component regulatory system with UvrY (NCBI)	3396.44	0.137443	0.0759662	1.80927	0.0704098	0.109897	316.14	FALSE
BW25113_4042	dgkA	diacylglycerol kinase (NCBI)	1451.07	0.137172	0.0671103	2.04398	0.0409558	0.0678505	183.891	FALSE
BW25113_2009	sbmC	DNA gyrase inhibitor (NCBI)	656.159	0.13705	0.157696	0.869073	0.384807	0.473268	1727.79	FALSE
BW25113_0996	torC	trimethylamine N-oxide (TMAO) reductase I, cytochrome c-type subunit (NCBI)	45.4314	0.137035	0.357263	0.38357	0.701297	0.763527	3148.82	FALSE
BW25113_4611	sibE		945.976	0.136939	0.0984049	1.39159	0.164047	0.230862	736.571	FALSE
BW25113_4539	yoeB		1116.23	0.136903	0.130377	1.05005	0.293693	0.378245	1318.68	FALSE
BW25113_3847	pepQ	proline dipeptidase (NCBI)	13601.4	0.13666	0.120595	1.13322	0.257124	0.339246	1154.49	FALSE
BW25113_4182	yjfJ	predicted transcriptional regulator effector protein (NCBI)	73.7842	0.136446	0.274909	0.49633	0.619662	0.694663	2782.28	FALSE
BW25113_2293	yfbT	putative phosphatase (VIMSS)	3809.91	0.135883	0.135735	1.00109	0.316782	0.403686	1422.35	FALSE
BW25113_3503	arsC	arsenate reductase (NCBI)	357.361	0.13571	0.135299	1.00303	0.315845	0.402734	1418.14	FALSE
BW25113_4194	ulaB	L-ascorbate-specific enzyme IIB component of PTS (NCBI)	119.074	0.135681	0.176632	0.768158	0.442394	0.529689	1986.35	FALSE
BW25113_0176	rseP		24481.2	0.134414	0.075371	1.78336	0.0745269	0.115318	334.626	FALSE
BW25113_2804	fucU	L-fucose mutarotase (NCBI)	568.848	0.134205	0.145768	0.920674	0.357221	0.445456	1603.92	FALSE
BW25113_2341	fadJ	fused enoyl-CoA hydratase and epimerase and isomerase/3-hydroxyacyl-CoA dehydrogenase (NCBI)	2191.76	0.1342	0.284769	0.471261	0.637454	0.709726	2862.17	FALSE
BW25113_3188	sfsB	DNA-binding transcriptional activator of maltose metabolism (NCBI)	537.296	0.133845	0.133832	1.00009	0.317266	0.404071	1424.52	FALSE
BW25113_3248	yhdE	Maf-like protein (NCBI)	3604.75	0.133353	0.0678861	1.96436	0.0494882	0.080497	222.202	FALSE
BW25113_0414	ribD		7784.47	0.13335	0.0778724	1.71242	0.0868192	0.131833	389.818	FALSE
BW25113_3582	sgbU	probable 3-hexulose-6-phosphate isomerase (VIMSS)	79.595	0.132931	0.216108	0.615115	0.538478	0.622112	2417.77	FALSE
BW25113_2325	yfcL	hypothetical protein (NCBI)	2581.41	0.131825	0.0850572	1.54984	0.121179	0.176986	544.093	FALSE
BW25113_2263	menH	predicted peptidase (NCBI)	1460.26	0.131719	0.0846919	1.55527	0.119882	0.175321	538.271	FALSE
BW25113_3380	yhfW	predicted mutase (NCBI)	111.288	0.131306	0.922363	0.142358	0.886797	0.918381	3981.72	FALSE
BW25113_2413	cysZ	putative sulfate transport protein CysZ (NCBI)	1625.46	0.131086	0.102462	1.27937	0.200768	0.275103	901.447	FALSE
BW25113_1673	ydhV	predicted oxidoreductase (NCBI)	96.3758	0.131045	0.266588	0.491565	0.623027	0.697569	2797.39	FALSE
BW25113_3704	rnpA		23171.7	0.130301	0.174765	0.74558	0.455921	0.543272	2047.09	FALSE
BW25113_0767	pgl	6-phosphogluconolactonase (NCBI)	7189.4	0.129915	0.113323	1.14642	0.251622	0.332771	1129.78	FALSE
BW25113_3491	yhiM	conserved inner membrane protein (RefSeq)	204.167	0.12947	0.211075	0.613383	0.539623	0.623113	2422.91	FALSE
BW25113_0891	lolA		6204.68	0.129119	0.0769821	1.67726	0.0934924	0.140915	419.781	FALSE
BW25113_0967	rlmI	predicted methyltransferase (RefSeq)	7118.4	0.128806	0.103003	1.2505	0.211115	0.286999	947.908	FALSE
BW25113_0422	xseB		2444.94	0.128295	0.102699	1.24923	0.211582	0.287546	950.003	FALSE
BW25113_0567	ybcH	hypothetical protein (NCBI)	237.532	0.128101	0.179176	0.714948	0.474641	0.560951	2131.14	FALSE
BW25113_4301	sgcE	ribulose-phosphate 3-epimerase (NCBI)	136.802	0.127765	0.212396	0.60154	0.54748	0.630074	2458.19	FALSE
BW25113_1705	ydiE		496.317	0.127509	0.171017	0.745593	0.455914	0.543272	2047.05	FALSE
BW25113_4377	yjjU	predicted esterase (NCBI)	2202.29	0.127029	0.148301	0.856565	0.391685	0.479673	1758.67	FALSE
BW25113_3357	crp		32866.7	0.126535	0.106154	1.192	0.233263	0.312179	1047.35	FALSE
BW25113_1361	ydaW		52.659	0.126378	0.254185	0.497189	0.619056	0.694422	2779.56	FALSE
BW25113_0158	btuF	vitamin B12-transporter protein BtuF (NCBI)	2137.53	0.126328	0.0860343	1.46835	0.14201	0.203299	637.623	FALSE
BW25113_3950	frwB	predicted enzyme IIB component of PTS (NCBI)	83.6346	0.125846	0.277051	0.454235	0.64966	0.72045	2916.97	FALSE
BW25113_0662	ubiF		3269.65	0.12496	0.106382	1.17463	0.240143	0.319477	1078.24	FALSE
BW25113_4472	yhdP	conserved membrane protein, predicted transporter (NCBI)	6225.15	0.124891	0.0555098	2.2499	0.0244554	0.0425949	109.805	FALSE
BW25113_2044	wcaL	predicted glycosyl transferase (NCBI)	435.927	0.124595	0.132139	0.94291	0.345727	0.434025	1552.31	FALSE
BW25113_4137	cutA	copper binding protein, copper sensitivity (NCBI)	1203.59	0.124158	0.123209	1.00771	0.313595	0.400516	1408.04	FALSE
BW25113_1591	dmsD	putative oxidoreductase component (VIMSS)	1308.84	0.123979	0.074267	1.66938	0.0950429	0.143011	426.743	FALSE
BW25113_0459	maa	maltose O-acetyltransferase (NCBI)	2257.32	0.12297	0.177155	0.694136	0.487597	0.573544	2189.31	FALSE
BW25113_0178	skp	periplasmic chaperone (NCBI)	31702.7	0.122955	0.0602581	2.04047	0.0413038	0.0683512	185.454	FALSE
BW25113_3213	gltD	glutamate synthase, 4Fe-4S protein, small subunit (NCBI)	3257.6	0.122516	0.130066	0.941954	0.346216	0.434395	1554.51	FALSE
BW25113_1098	tmk		2633.01	0.121359	0.0936212	1.29627	0.194881	0.268351	875.017	FALSE
BW25113_3353	yheT	predicted hydrolase (NCBI)	2682.86	0.120983	0.0658852	1.83627	0.0663183	0.104353	297.769	FALSE
BW25113_4150	ampC	beta-lactamase/D-alanine carboxypeptidase (NCBI)	811.253	0.120858	0.111033	1.08849	0.276379	0.35967	1240.94	FALSE
BW25113_4499	yehH		349.951	0.120442	0.114612	1.05087	0.293319	0.377981	1317	FALSE
BW25113_0010	satP	conserved inner membrane protein associated with acetate transport (NCBI)	1119.03	0.119975	0.166872	0.71896	0.472166	0.558695	2120.02	FALSE
BW25113_0299	insF1		340.627	0.119965	0.13732	0.873613	0.382329	0.470866	1716.66	FALSE
BW25113_2064	asmA	predicted assembly protein (NCBI)	4869.11	0.119956	0.0679412	1.76558	0.077466	0.119371	347.822	FALSE
BW25113_4155	epmA		2093.88	0.119953	0.212813	0.563653	0.57299	0.652307	2572.73	FALSE
BW25113_0402	proY	predicted cryptic proline transporter (NCBI)	4648.81	0.119631	0.162197	0.737565	0.460779	0.547894	2068.9	FALSE
BW25113_2319	usg	hypothetical protein (NCBI)	4848.61	0.119458	0.0797091	1.49867	0.133959	0.193506	601.477	FALSE
BW25113_1672	ydhW	hypothetical protein (NCBI)	74.898	0.118952	0.273062	0.435622	0.663111	0.731923	2977.37	FALSE
BW25113_0981	etk	cryptic autophosphorylating protein tyrosine kinase Etk (NCBI)	810.36	0.118687	0.104285	1.1381	0.255078	0.337143	1145.3	FALSE
BW25113_3067	rpoD		56133	0.118413	0.0941431	1.2578	0.208466	0.284	936.011	FALSE
BW25113_3550	yiaC	predicted acyltransferase with acyl-CoA N-acyltransferase domain (NCBI)	558.11	0.118403	0.122648	0.965392	0.334349	0.422822	1501.23	FALSE
BW25113_2035	wbbH	O-antigen polymerase (NCBI)	17.6772	0.118144	0.408028	0.28955	0.772161	0.82327	3467	FALSE
BW25113_2947	gshB	glutathione synthetase (NCBI)	6317.8	0.118073	0.0768529	1.53635	0.124453	0.181236	558.794	FALSE
BW25113_0006	yaaA	hypothetical protein (NCBI)	2888.66	0.118045	0.082881	1.42427	0.154368	0.218325	693.114	FALSE
BW25113_1557	cspB	Qin prophage; cold shock protein (NCBI)	359.211	0.117879	0.262594	0.448902	0.653502	0.72369	2934.23	FALSE
BW25113_3850	hemG		1795.78	0.117081	0.0756065	1.54856	0.121487	0.177262	545.475	FALSE
BW25113_2721	hycE	hydrogenase 3, large subunit (NCBI)	157.283	0.116972	0.164648	0.710439	0.477432	0.563654	2143.67	FALSE
BW25113_0962	helD	DNA helicase IV (NCBI)	3643.24	0.116817	0.0953193	1.22553	0.220376	0.29787	989.489	FALSE
BW25113_2720	hycF	formate hydrogenlyase complex iron-sulfur protein (NCBI)	53.6436	0.116173	0.22419	0.518189	0.604326	0.681603	2713.42	FALSE
BW25113_0289	ecpE	orf, hypothetical protein (VIMSS)	178.15	0.115968	0.22749	0.509771	0.610212	0.686565	2739.85	FALSE
BW25113_1871	cmoB	predicted S-adenosyl-L-methionine-dependent methyltransferase (NCBI)	3272.22	0.115306	0.147976	0.77922	0.43585	0.523534	1956.97	FALSE
BW25113_3355	prkB	predicted phosphoribulokinase (NCBI)	1924.75	0.115274	0.113578	1.01493	0.310137	0.397026	1392.52	FALSE
BW25113_4213	cpdB	bifunctional 2',3'-cyclic nucleotide 2'-phosphodiesterase/3'-nucleotidase periplasmic precursor protein (NCBI)	3815.77	0.11411	0.157454	0.724721	0.468623	0.555745	2104.12	FALSE
BW25113_1213	ychQ	predicted transcriptional regulator (NCBI)	987.427	0.11325	0.140413	0.806548	0.419927	0.507539	1885.47	FALSE
BW25113_3464	ftsY		16030.3	0.112984	0.0501452	2.25314	0.0242502	0.0422538	108.883	FALSE
BW25113_2756	casE	hypothetical protein (NCBI)	187.016	0.112529	0.233162	0.482622	0.629364	0.702965	2825.84	FALSE
BW25113_2268	rbn	orf, hypothetical protein (VIMSS)	1857.77	0.11235	0.0774515	1.45059	0.146894	0.209022	659.554	FALSE
BW25113_0524	lpxH		4646.56	0.111704	0.061948	1.80319	0.0713591	0.11097	320.403	FALSE
BW25113_1789	yeaL	conserved inner membrane protein (NCBI)	363.16	0.111295	0.136639	0.814518	0.415349	0.502548	1864.91	FALSE
BW25113_2287	nuoB	NADH dehydrogenase subunit B (NCBI)	35919.5	0.111045	0.154564	0.718435	0.472489	0.55885	2121.48	FALSE
BW25113_3701	dnaN		8914.38	0.110811	0.129642	0.854752	0.392689	0.480443	1763.17	FALSE
BW25113_1407	ydbD	orf, hypothetical protein (VIMSS)	117.296	0.110488	0.199661	0.553378	0.580004	0.658534	2604.22	FALSE
BW25113_0407	yajC	preprotein translocase subunit YajC (NCBI)	19125.2	0.110226	0.0743463	1.4826	0.138181	0.19858	620.435	FALSE
BW25113_3729	glmS		47150.2	0.110035	0.0682901	1.61129	0.107117	0.159095	480.955	FALSE
BW25113_0013	yaaI	hypothetical protein (NCBI)	60.5951	0.109696	0.262139	0.418464	0.675608	0.743454	3033.48	FALSE
BW25113_0843	ybjH	hypothetical protein (NCBI)	485.559	0.109647	0.151381	0.724308	0.468876	0.555751	2105.26	FALSE
BW25113_1901	araF	L-arabinose transporter subunit (NCBI)	130.076	0.109149	0.228522	0.477629	0.632914	0.705852	2841.78	FALSE
BW25113_3062	ttdB	L(+)-tartrate dehydratase (NCBI)	34.7525	0.10868	0.903607	0.120273	0.904267	0.930661	4060.16	FALSE
BW25113_2257	arnT	4-amino-4-deoxy-L-arabinose transferase (NCBI)	578.992	0.108574	0.151038	0.718851	0.472233	0.558695	2120.33	FALSE
BW25113_3354	yheU	hypothetical protein (NCBI)	675.097	0.107321	0.096041	1.11745	0.263804	0.346122	1184.48	FALSE
BW25113_2161	nupX	predicted nucleoside transporter (NCBI)	107.964	0.106351	0.195117	0.545062	0.585711	0.663605	2629.84	FALSE
BW25113_0024	yaaY		491.405	0.105823	0.152337	0.694667	0.487264	0.573544	2187.82	FALSE
BW25113_3251	mreB		28736.2	0.105749	0.0887849	1.19107	0.233625	0.312571	1048.98	FALSE
BW25113_3223	nanE	predicted N-acetylmannosamine-6-P epimerase (NCBI)	1221.76	0.105538	0.527312	0.200143	0.841369	0.880498	3777.75	FALSE
BW25113_2270	yfbK	hypothetical protein (NCBI)	162.138	0.105428	0.256593	0.410876	0.681163	0.747793	3058.42	FALSE
BW25113_1952	dsrB	hypothetical protein (NCBI)	571.04	0.104949	0.111818	0.938571	0.347951	0.436205	1562.3	FALSE
BW25113_0755	gpmA	phosphoglyceromutase (NCBI)	39338.6	0.104487	0.0752724	1.38812	0.165102	0.232145	741.307	FALSE
BW25113_3030	parE		16527.2	0.103917	0.151444	0.686178	0.492601	0.577755	2211.78	FALSE
BW25113_2913	serA	D-3-phosphoglycerate dehydrogenase (NCBI)	2954.39	0.103503	0.169448	0.610826	0.541315	0.624744	2430.5	FALSE
BW25113_3487	yhiI	predicted HlyD family secretion protein (NCBI)	1512.24	0.103262	0.157378	0.656142	0.511733	0.597066	2297.68	FALSE
BW25113_3623	waaU	lipopolysaccharide core biosynthesis (NCBI)	1014.94	0.103019	0.204356	0.504114	0.614181	0.690164	2757.67	FALSE
BW25113_0177	bamA		80568.1	0.10298	0.07473	1.37803	0.168193	0.235807	755.184	FALSE
BW25113_3911	cpxA	two-component sensor protein (NCBI)	6136.21	0.102752	0.0797842	1.28788	0.197788	0.271769	888.069	FALSE
BW25113_2794	queF	hypothetical protein (NCBI)	3039.92	0.102621	0.0702109	1.46161	0.143848	0.205601	645.879	FALSE
BW25113_0518	fdrA	membrane protein FdrA (NCBI)	54.4723	0.101748	0.305892	0.332626	0.739416	0.796513	3319.98	FALSE
BW25113_2383	fryA	fused predicted PTS enzymes: Hpr component/enzyme I component/enzyme IIA component (NCBI)	273.279	0.101673	0.136216	0.746409	0.45542	0.543109	2044.84	FALSE
BW25113_3738	atpB		73900.2	0.101583	0.0945685	1.07417	0.282746	0.366466	1269.53	FALSE
BW25113_3581	sgbH	3-keto-L-gulonate 6-phosphate decarboxylase (NCBI)	42.7757	0.101575	0.295997	0.343162	0.731476	0.790051	3284.33	FALSE
BW25113_0896	dmsC	dimethyl sulfoxide reductase, anaerobic, subunit C (NCBI)	245.075	0.100842	0.243148	0.414735	0.678336	0.745421	3045.73	FALSE
BW25113_0090	murG		7298.25	0.100414	0.0726183	1.38276	0.166738	0.234061	748.654	FALSE
BW25113_0376	ampH	beta-lactamase/D-alanine carboxypeptidase (NCBI)	3006.93	0.100291	0.246502	0.406857	0.684113	0.749378	3071.67	FALSE
BW25113_0917	ycaR		2728.02	0.100044	0.102096	0.9799	0.327136	0.414755	1468.84	FALSE
BW25113_3421	rtcB	hypothetical protein (NCBI)	444.632	0.100008	0.112786	0.886706	0.375237	0.463406	1684.81	FALSE
BW25113_3912	cpxR	DNA-binding response regulator in two-component regulatory system with CpxA (NCBI)	4828.24	0.0994889	0.112135	0.887225	0.374958	0.463191	1683.56	FALSE
BW25113_1542	ydfI	predicted mannonate dehydrogenase (NCBI)	203.927	0.0993016	0.198252	0.500887	0.616451	0.692193	2767.86	FALSE
BW25113_4019	metH	B12-dependent methionine synthase (NCBI)	8371.42	0.0992948	0.154494	0.64271	0.520412	0.605154	2336.65	FALSE
BW25113_0074	leuA	2-isopropylmalate synthase (NCBI)	685.309	0.0990482	0.122953	0.805579	0.420486	0.508078	1887.98	FALSE
BW25113_0792	ybhR	predicted transporter subunit: membrane component of ABC superfamily (NCBI)	585.507	0.0989916	0.147399	0.671591	0.501844	0.587365	2253.28	FALSE
BW25113_4166	queG	predicted Fe-S electron transport protein (NCBI)	1852.09	0.0977824	0.155093	0.630476	0.528383	0.612979	2372.44	FALSE
BW25113_2421	cysM	cysteine synthase B (O-acetylserine sulfhydrolase B) (NCBI)	2990.22	0.0971418	0.20509	0.473655	0.635746	0.708353	2854.5	FALSE
BW25113_2493	yfgO	predicted inner membrane protein (NCBI)	1507.53	0.0962026	0.105782	0.909439	0.363118	0.450928	1630.4	FALSE
BW25113_1837	yebW	orf, hypothetical protein (VIMSS)	172.594	0.0960892	0.165963	0.578981	0.562602	0.643507	2526.08	FALSE
BW25113_1145	cohE		2153.49	0.095246	0.112224	0.848712	0.396042	0.483104	1778.23	FALSE
BW25113_4160	psd		8903.15	0.0950663	0.0525778	1.80811	0.0705897	0.110101	316.948	FALSE
BW25113_3322	gspB	part of gsp divergon involved in type II protein secretion (NCBI)	165.397	0.0948174	0.177939	0.532863	0.594128	0.672185	2667.64	FALSE
BW25113_4169	amiB	N-acetylmuramoyl-l-alanine amidase II (NCBI)	4239.69	0.0947176	0.0770577	1.22918	0.219005	0.296107	983.333	FALSE
BW25113_0175	cdsA		10544.8	0.0945633	0.118033	0.801158	0.42304	0.510338	1899.45	FALSE
BW25113_2831	mutH	DNA mismatch repair protein (NCBI)	528.632	0.0936628	0.191141	0.49002	0.62412	0.698528	2802.3	FALSE
BW25113_4442	micA		575.682	0.0936508	0.144889	0.646364	0.518044	0.603329	2326.02	FALSE
BW25113_0492	ybbN	putative thioredoxin-like protein (VIMSS)	9919.68	0.0933616	0.125931	0.74137	0.458469	0.545872	2058.53	FALSE
BW25113_0642	leuS		50840.4	0.0932923	0.0734501	1.27015	0.204032	0.27898	916.106	FALSE
BW25113_3877	yihP	predicted transporter (RefSeq)	113.689	0.0930342	0.18307	0.508188	0.611321	0.687373	2744.83	FALSE
BW25113_0394	mak	possible NAGC-like transcriptional regulator (VIMSS)	1642.06	0.0930058	0.129244	0.719616	0.471761	0.558432	2118.21	FALSE
BW25113_4345	mcrC		5.94815	0.0928493	0.631466	0.147038	0.883102	0.91553	3965.13	FALSE
BW25113_4639	yeeH		12.9781	0.0928348	0.471228	0.197006	0.843823	0.882241	3788.76	FALSE
BW25113_1917	yecC	predicted transporter subunit: ATP-binding component of ABC superfamily (NCBI)	849.904	0.0925559	0.0898703	1.02988	0.303065	0.388861	1360.76	FALSE
BW25113_4673	ymjD		2.03606	0.0921934	1.57937	0.0583736	0.953451	0.967714	4281	FALSE
BW25113_0066	thiQ	thiamin transporter subunit (NCBI)	771.192	0.0921543	0.118828	0.775527	0.438029	0.525869	1966.75	FALSE
[truncated: 2,495 more rows]

## Sheet: ygbE_ASKA vs wt
# Diferential expression of ygbE ASKA (1mM IPTG) versus BW25113 using DESeq2
# Differential regulation is considered if abs(log2_fold_change) > 2 & p_adj < 0.001 (Bonferoni) and is represented by Significant_Plot=TRUE
# Positive log2_fold_change is considered upregulated versus BW25113. Negative log2_fold_change is considered downregulated versus BW25113.
# For additional details of values, please refer to the DESeq2 manual
gene_id	gene_name	desc	baseMean	log2_fold_change	lfcSE	stat	p_value	q_value	p_adj	Significant_Plot
BW25113_2749	ygbE	conserved inner membrane protein (NCBI)	118248	10.1737	0.147204	69.1132	0	0	0	TRUE
BW25113_2256	arnD	hypothetical protein (NCBI)	757.403	7.41525	0.957109	7.74755	9.36829e-15	1.49293e-13	4.20636e-11	TRUE
BW25113_2252	ais	hypothetical protein (NCBI)	1091.86	6.60967	0.202165	32.6945	1.86908e-234	3.98558e-232	8.39215e-231	TRUE
BW25113_0345	lacI	transcriptional repressor of the lac operon (VIMSS)	60649.2	6.38657	0.159537	40.0318	0	0	0	TRUE
BW25113_2254	arnC	undecaprenyl phosphate-L-Ara4FN transferase (NCBI)	1981.04	6.26856	0.161856	38.7291	0	0	0	TRUE
BW25113_1172	ymgG	conserved protein, UPF0757 family (RefSeq)	3450.4	6.2637	0.128804	48.6296	0	0	0	TRUE
BW25113_4593	ymgI		577.602	6.21754	0.227079	27.3805	4.67789e-165	6.75728e-163	2.10037e-161	TRUE
BW25113_3608	gpsA		87.4471	6.17295	1.44907	4.25993				FALSE
BW25113_3024	ygiW	hypothetical protein (NCBI)	11172	6.07485	0.120845	50.2698	0	0	0	TRUE
BW25113_1171	ymgD	orf, hypothetical protein (VIMSS)	3455.24	5.93061	0.134684	44.0335	0	0	0	TRUE
BW25113_2253	arnB	uridine 5'-(beta-1-threo-pentapyranosyl-4-ulose diphosphate) aminotransferase, PLP-dependent (RefSeq)	2679.29	5.81941	0.12595	46.2042	0	0	0	TRUE
BW25113_4114	eptA	orf, hypothetical protein (VIMSS)	3074.62	5.69141	0.125631	45.3025	0	0	0	TRUE
BW25113_2479	gcvR	transcriptional regulation of gcv operon (VIMSS)	67.3257	5.68678	1.72236	3.30173	0.00096091	0.00354153	4.31449	FALSE
BW25113_1283	osmB	lipoprotein (NCBI)	2175.61	5.64371	0.12364	45.6462	0	0	0	TRUE
BW25113_3023	ygiV	predicted transcriptional regulator (NCBI)	4499.59	5.60677	0.178718	31.3722	4.84584e-216	9.86349e-214	2.17578e-212	TRUE
BW25113_1597	asr	acid shock protein (VIMSS)	255.037	5.10015	0.279676	18.2359	2.67633e-74	1.81585e-72	1.20167e-70	TRUE
BW25113_1481	bdm	orf, hypothetical protein (VIMSS)	126.611	4.85188	0.481346	10.0798	6.78547e-24	1.69751e-22	3.04668e-20	TRUE
BW25113_2178	yejB	predicted oligopeptide transporter subunit (NCBI)	207.474	4.75809	1.84585	2.57772				FALSE
BW25113_2424	cysU	sulfate/thiosulfate transporter subunit (NCBI)	173.94	4.48695	0.456725	9.82418	8.85931e-23	2.088e-21	3.97783e-19	TRUE
BW25113_2671	ygaC	hypothetical protein (NCBI)	1093.83	4.38124	0.161627	27.1071	8.12918e-162	1.1031e-159	3.65e-158	TRUE
BW25113_2255	arnA	hypothetical protein (NCBI)	4107.94	4.35999	0.141774	30.7532	1.10759e-207	2.15642e-205	4.97306e-204	TRUE
BW25113_0220	ivy	inhibitor of vertebrate C-lysozyme (NCBI)	8568.07	4.25357	0.10147	41.9194	0	0	0	TRUE
BW25113_3444	insA		699.403	3.96502	0.145286	27.2911	5.40399e-164	7.5622e-162	2.42639e-160	TRUE
BW25113_2764	cysJ	sulfite reductase, alpha subunit, flavoprotein (NCBI)	2383.58	3.93724	0.381439	10.3221	5.59996e-25	1.46647e-23	2.51438e-21	TRUE
BW25113_0795	ybhG	hypothetical protein (NCBI)	452.616	3.85753	0.877765	4.39472	1.10915e-05	6.53521e-05	0.0498007	FALSE
BW25113_3443	yrhA	orf, hypothetical protein (VIMSS)	132.084	3.85422	0.968643	3.97899	6.92089e-05	0.000339822	0.310748	FALSE
BW25113_2422	cysA	sulfate/thiosulfate transporter subunit (NCBI)	1146.88	3.67824	0.543288	6.77034	1.28483e-11	1.6533e-10	5.76889e-08	TRUE
BW25113_2423	cysW	sulfate/thiosulfate transporter subunit (NCBI)	471.546	3.56789	0.407029	8.76569	1.85639e-18	3.6301e-17	8.33521e-15	TRUE
BW25113_2752	cysD	sulfate adenylyltransferase subunit 2 (NCBI)	1107.57	3.56114	0.624608	5.7014	1.18831e-08	1.09943e-07	5.33549e-05	TRUE
BW25113_2425	cysP	thiosulfate transporter subunit (NCBI)	893.808	3.53203	0.288061	12.2614	1.45962e-34	4.63558e-33	6.55368e-31	TRUE
BW25113_4333	yjiK	conserved protein (RefSeq)	634.285	3.44	0.156425	21.9914	3.47827e-107	3.31398e-105	1.56175e-103	TRUE
BW25113_1160	iraM		121.408	3.23012	0.325107	9.93556	2.91544e-23	7.01901e-22	1.30903e-19	TRUE
BW25113_2390	ypeC	hypothetical protein (NCBI)	1010.5	3.18753	0.11834	26.9354	8.46875e-160	1.11538e-157	3.80247e-156	TRUE
BW25113_0379	yaiY	predicted inner membrane protein (NCBI)	279.664	3.07918	0.178757	17.2255	1.71003e-66	1.00757e-64	7.67802e-63	TRUE
BW25113_2466	ypfG	hypothetical protein (NCBI)	807.41	3.06861	0.137105	22.3816	5.95258e-111	5.92348e-109	2.67271e-107	TRUE
BW25113_2257	arnT	4-amino-4-deoxy-L-arabinose transferase (NCBI)	578.992	3.04696	0.141963	21.4631	3.44814e-102	3.15118e-100	1.54821e-98	TRUE
BW25113_4484	cpxP	periplasmic protein combats stress (NCBI)	2749.75	3.0074	0.10382	28.9674	1.69672e-184	2.92227e-182	7.61826e-181	TRUE
BW25113_4112	basS	sensory histidine kinase in two-component regulatory system with BasR (NCBI)	2458.91	2.95979	0.107129	27.6283	5.09321e-168	7.60246e-166	2.28685e-164	TRUE
BW25113_2763	cysI	sulfite reductase, beta subunit, NAD(P)-binding, heme-binding (NCBI)	3704.12	2.91932	0.729174	4.00359	6.23882e-05	0.000309385	0.280123	FALSE
BW25113_0841	ybjG	undecaprenyl pyrophosphate phosphatase (NCBI)	3010.01	2.83575	0.146639	19.3383	2.55764e-83	1.90554e-81	1.14838e-79	TRUE
BW25113_1113	ldtC	hypothetical protein (NCBI)	1529.3	2.83453	0.134067	21.1427	3.22241e-99	2.88599e-97	1.44686e-95	TRUE
BW25113_2751	cysN	sulfate adenylyltransferase subunit 1 (NCBI)	2053.93	2.81833	0.600132	4.69619	2.65061e-06	1.7353e-05	0.0119013	FALSE
BW25113_4113	basR	DNA-binding response regulator in two-component regulatory system with BasS (NCBI)	2628.07	2.77263	0.141458	19.6004	1.53463e-85	1.18484e-83	6.8905e-82	TRUE
BW25113_2013	yeeE	predicted inner membrane protein (NCBI)	2739.11	2.74124	0.605859	4.52455	6.05256e-06	3.77484e-05	0.027176	FALSE
BW25113_1639	mliC	orf, hypothetical protein (VIMSS)	482.693	2.73845	0.117459	23.3141	3.18918e-120	3.40027e-118	1.43194e-116	TRUE
BW25113_2635	ypjK	CP4-57 prophage; predicted inner membrane protein (NCBI)	5.7444	2.67828	1.18403	2.26202	0.0236965	0.0577014	106.397	FALSE
BW25113_2086	yegS	hypothetical protein (NCBI)	638.745	2.63358	0.168839	15.5981	7.49429e-55	3.57015e-53	3.36494e-51	TRUE
BW25113_2051	wcaH	GDP-mannose mannosyl hydrolase (VIMSS)	445.917	2.6037	0.201474	12.9233	3.3278e-38	1.1463e-36	1.49418e-34	TRUE
BW25113_1505	ydeT		81.9106	2.58549	0.353398	7.3161	2.55283e-13	3.69954e-12	1.14622e-09	TRUE
BW25113_4376	osmY	periplasmic protein (NCBI)	4639.87	2.55367	0.141144	18.0927	3.64034e-73	2.39727e-71	1.63451e-69	TRUE
BW25113_4131	cadA	lysine decarboxylase 1 (NCBI)	1029.12	2.53576	0.202268	12.5366	4.70756e-36	1.53872e-34	2.1137e-32	TRUE
BW25113_1503	ydeR	predicted fimbrial-like adhesin protein (NCBI)	25.8753	2.53291	0.600231	4.21989	2.44419e-05	0.000133477	0.109744	FALSE
BW25113_0294	ecpR	predicted regulator (NCBI)	55.0108	2.48619	0.332353	7.48056	7.40046e-14	1.1158e-12	3.32281e-10	TRUE
BW25113_4698	mgrR	sRNA antisense regulator down regulates YgdQ and EptB, PhoPQ-regulated, Hfq-dependent; affects sensitivity to antimicrobial peptides (RefSeq)	211.343	2.46481	0.219548	11.2268	3.01359e-29	8.48734e-28	1.3531e-25	TRUE
BW25113_1285	gmr	modulator of Rnase II stability (NCBI)	2560.73	2.43541	0.136678	17.8187	5.06306e-71	3.14894e-69	2.27331e-67	TRUE
BW25113_1730	ydjO		61.267	2.43329	0.502542	4.84195	1.28569e-06	8.83025e-06	0.00577275	FALSE
BW25113_4599	yneM		1570.42	2.42639	0.175811	13.8012	2.50794e-43	9.85138e-42	1.12607e-39	TRUE
BW25113_1523	yneG	hypothetical protein (NCBI)	9.17452	2.41517	0.799983	3.01902	0.00253591	0.00827079	11.3862	FALSE
BW25113_4242	mgtA	magnesium transporter (NCBI)	31461.9	2.39669	0.159272	15.0478	3.5716e-51	1.61552e-49	1.60365e-47	TRUE
BW25113_2050	wcaI	predicted glycosyl transferase (NCBI)	659.826	2.39377	0.16682	14.3494	1.0742e-46	4.49558e-45	4.82317e-43	TRUE
BW25113_3026	qseC	sensory histidine kinase in two-component regulatory system with QseB (NCBI)	1661.76	2.38017	0.150596	15.805	2.87261e-56	1.41358e-54	1.2898e-52	TRUE
BW25113_2762	cysH	phosphoadenosine phosphosulfate reductase (NCBI)	1954.57	2.36589	0.80913	2.92399	0.00345574	0.0107989	15.5163	FALSE
BW25113_3025	qseB	DNA-binding response regulator in two-component regulatory system with QseC (NCBI)	1172.37	2.36228	0.840696	2.8099	0.00495562	0.0146768	22.2507	FALSE
BW25113_0022	insA		581.877	2.34321	0.136203	17.2038	2.48501e-66	1.42665e-64	1.11577e-62	TRUE
BW25113_2062	wza	lipoprotein required for capsular polysaccharide translocation through the outer membrane (NCBI)	370.009	2.32243	0.268501	8.64962	5.16712e-18	9.80439e-17	2.32004e-14	TRUE
BW25113_4568	ytjA	predicted protein (RefSeq)	858.057	2.27443	0.150612	15.1012	1.58994e-51	7.26507e-50	7.13885e-48	TRUE
BW25113_2052	wcaG	bifunctional GDP-fucose synthetase: GDP-4-dehydro-6-deoxy-D-mannose epimerase/ GDP-4-dehydro-6-L-deoxygalactose reductase (NCBI)	1167.89	2.27388	0.138606	16.4053	1.75132e-60	9.22638e-59	7.86344e-57	TRUE
BW25113_2055	wcaE		257.418	2.26238	0.277012	8.1671	3.15897e-16	5.36176e-15	1.41838e-12	TRUE
BW25113_4703	pmrR		201.517	2.2389	0.197413	11.3412	8.20205e-30	2.32461e-28	3.68272e-26	TRUE
BW25113_4457	csrC	regulatory RNA (NCBI)	19805.4	2.23525	0.0973317	22.9653	1.03728e-116	1.08022e-114	4.65738e-113	TRUE
BW25113_2053	gmd	GDP-D-mannose dehydratase, NAD(P)-binding (NCBI)	1929.57	2.23519	0.149439	14.9572	1.39874e-50	6.20154e-49	6.28034e-47	TRUE
BW25113_1826	mgrB		2968.25	2.22114	0.0837702	26.5147	6.5677e-155	8.4029e-153	2.9489e-151	TRUE
BW25113_2061	wzb	protein-tyrosine phosphatase (NCBI)	156.83	2.21419	0.293839	7.5354	4.86836e-14	7.39e-13	2.18589e-10	TRUE
BW25113_1504	ydeS	predicted fimbrial-like adhesin protein (NCBI)	27.9334	2.18205	0.410808	5.31161	1.08664e-07	8.76749e-07	0.0004879	TRUE
BW25113_2054	wcaF	predicted acyl transferase (NCBI)	287.184	2.17828	0.255589	8.5226	1.56016e-17	2.86327e-16	7.0051e-14	TRUE
BW25113_4553	ysaB	hypothetical protein (NCBI)	136.83	2.17818	0.213711	10.1922	2.14917e-24	5.46817e-23	9.64977e-21	TRUE
BW25113_1536	ydeI		90.4729	2.17689	0.230329	9.4512	3.34967e-21	7.35286e-20	1.504e-17	TRUE
BW25113_1110	ycfJ	hypothetical protein (NCBI)	2349.91	2.14972	0.175673	12.2371	1.96957e-34	6.21109e-33	8.84338e-31	TRUE
BW25113_3088	alx	predicted inner membrane protein, part of terminus (NCBI)	988.305	2.12374	0.152298	13.9446	3.39159e-44	1.35603e-42	1.52282e-40	TRUE
BW25113_1379	hslJ	heat-inducible protein (NCBI)	3333.35	2.11688	0.128985	16.4118	1.57479e-60	8.39515e-59	7.07082e-57	TRUE
BW25113_2049	cpsB	mannose-1-phosphate guanyltransferase (NCBI)	725.707	2.10883	0.142938	14.7534	2.92368e-49	1.25887e-47	1.31273e-45	TRUE
BW25113_2060	wzc	orf, hypothetical protein (VIMSS)	913.488	2.08587	0.233358	8.9385	3.94487e-19	7.88623e-18	1.77125e-15	TRUE
BW25113_2809	ygdI	orf, hypothetical protein (VIMSS)	489.914	2.07199	0.136266	15.2055	3.25366e-52	1.50205e-50	1.46089e-48	TRUE
BW25113_4702	mgtL	regulatory leader peptide for mgtA (NCBI)	588.401	2.03501	0.145715	13.9657	2.5237e-44	1.01812e-42	1.13314e-40	TRUE
BW25113_1974	yodB	putative cytochrome (VIMSS)	190.788	2.02751	0.173223	11.7046	1.20659e-31	3.5782e-30	5.41757e-28	TRUE
BW25113_0877	ybjX	hypothetical protein (NCBI)	15840.8	2.02108	0.103229	19.5786	2.35607e-85	1.78822e-83	1.05788e-81	TRUE
BW25113_2056	wcaD	predicted colanic acid polymerase (NCBI)	295.364	2.01622	0.273629	7.36844	1.72641e-13	2.54305e-12	7.7516e-10	TRUE
BW25113_1743	spy	envelope stress induced periplasmic protein (NCBI)	1150.77	2.01246	0.167828	11.9912	3.95025e-33	1.21159e-31	1.77366e-29	TRUE
BW25113_1609	rstB	sensory histidine kinase in two-component regulatory system with RstA (NCBI)	5051.05	2.00218	0.0789525	25.3593	7.10261e-142	8.36986e-140	3.18907e-138	TRUE
BW25113_0412	yajI	orf, hypothetical protein (VIMSS)	523.48	1.91994	0.119846	16.0201	9.24409e-58	4.65113e-56	4.1506e-54	FALSE
BW25113_3543	dppB	dipeptide transporter (NCBI)	1055.46	1.91484	0.308208	6.2128	5.20478e-10	5.60265e-09	2.33695e-06	FALSE
BW25113_1502	ydeQ	predicted fimbrial-like adhesin protein (NCBI)	33.5601	1.91213	0.681667	2.80508	0.0050304	0.0148589	22.5865	FALSE
BW25113_0292	ecpB	hypothetical protein (NCBI)	77.1814	1.91146	0.233965	8.16985	3.08764e-16	5.27727e-15	1.38635e-12	FALSE
BW25113_1216	chaA	calcium/sodium:proton antiporter (NCBI)	5676.37	1.88491	0.0921611	20.4523	5.73138e-93	4.7528e-91	2.57339e-89	FALSE
BW25113_4132	cadB	predicted lysine/cadaverine transporter (NCBI)	538.956	1.8731	0.417941	4.48174	7.4038e-06	4.51078e-05	0.0332431	FALSE
BW25113_1608	rstA	DNA-binding response regulator in two-component regulatory system with RstB (RefSeq)	6431.84	1.86546	0.109433	17.0465	3.70924e-65	2.07624e-63	1.66545e-61	FALSE
BW25113_3027	ygiZ		27.9572	1.84526	0.376082	4.90653	9.27032e-07	6.51406e-06	0.00416237	FALSE
BW25113_4427	micC		2.56192	1.8441	1.37544	1.34073	0.180007	0.301561	808.232	FALSE
BW25113_2833	ygdR	hypothetical protein (NCBI)	1633.25	1.83875	0.0964935	19.0557	5.89105e-81	4.18732e-79	2.64508e-77	FALSE
BW25113_1897	otsB	trehalose-6-phosphate phosphatase, biosynthetic (NCBI)	369.689	1.83592	0.16027	11.4552	2.2151e-30	6.31797e-29	9.9458e-27	FALSE
BW25113_1829	htpX	heat shock protein HtpX (NCBI)	12520.8	1.8332	0.0957477	19.1461	1.04249e-81	7.52948e-80	4.68079e-78	FALSE
BW25113_1641	slyB		47614.4	1.82905	0.0834623	21.9147	1.8797e-106	1.7536e-104	8.43986e-103	FALSE
BW25113_1600	mdtJ		340.833	1.81358	0.274018	6.61847	3.62935e-11	4.4649e-10	1.62958e-07	FALSE
BW25113_4026	yjbE	hypothetical protein (NCBI)	2449.23	1.80408	0.165873	10.8762	1.49617e-27	4.1357e-26	6.71779e-24	FALSE
BW25113_3686	ibpB	heat shock chaperone (NCBI)	586.447	1.79993	0.286558	6.28122	3.35933e-10	3.71434e-09	1.50834e-06	FALSE
BW25113_1321	ycjX	conserved protein with nucleoside triphosphate hydrolase domain (NCBI)	3344.82	1.75579	0.172246	10.1935	2.12064e-24	5.42642e-23	9.52168e-21	FALSE
BW25113_3708	tnaA	tryptophanase (VIMSS)	4835.61	1.75403	0.674527	2.60039	0.00931182	0.025615	41.8101	FALSE
BW25113_1130	phoP		9144.97	1.74673	0.0880117	19.8466	1.18009e-87	9.27094e-86	5.29859e-84	FALSE
BW25113_1478	adhP	alcohol dehydrogenase (VIMSS)	2951.45	1.73781	0.0898673	19.3375	2.59576e-83	1.90554e-81	1.1655e-79	FALSE
BW25113_2048	cpsG	phosphomannomutase (NCBI)	740.131	1.7259	0.139792	12.3462	5.10634e-35	1.6333e-33	2.29275e-31	FALSE
BW25113_1825	yebO		5904.84	1.71643	0.119136	14.4073	4.65568e-47	1.9668e-45	2.0904e-43	FALSE
BW25113_1322	ycjF	hypothetical protein (NCBI)	2263.33	1.71266	0.143489	11.9358	7.70231e-33	2.34632e-31	3.45834e-29	FALSE
BW25113_1755	ynjC	fused transporter subunits of ABC superfamily: membrane components (RefSeq)	186.624	1.69019	1.37464	1.22954	0.218868	0.35344	982.716	FALSE
BW25113_1479	maeA	NAD-linked malate dehydrogenase (malic enzyme) (VIMSS)	35613.9	1.67411	0.0972717	17.2107	2.2091e-66	1.28472e-64	9.91885e-63	FALSE
BW25113_2936	loiP	orf, hypothetical protein (VIMSS)	5027.55	1.67169	0.0966656	17.2935	5.26576e-67	3.14401e-65	2.36433e-63	FALSE
BW25113_0019	nhaA	pH-dependent sodium/proton antiporter (NCBI)	5133.28	1.66812	0.111424	14.9709	1.137e-50	5.09151e-49	5.10515e-47	FALSE
BW25113_3542	dppC	dipeptide transporter (NCBI)	817.127	1.66477	0.222606	7.47856	7.51437e-14	1.12917e-12	3.37395e-10	FALSE
BW25113_0865	ybjP	predicted lipoprotein (NCBI)	943.905	1.66221	0.176265	9.43015	4.09497e-21	8.85859e-20	1.83864e-17	FALSE
BW25113_3744	asnA	asparagine synthetase AsnA (NCBI)	7078.1	1.63549	0.0912462	17.9239	7.67479e-72	4.84052e-70	3.44598e-68	FALSE
BW25113_4111	proP	proline/glycine betaine transporter (NCBI)	9301.18	1.63366	0.162989	10.0231	1.2066e-23	2.96877e-22	5.41764e-20	FALSE
BW25113_1732	katE	hydroperoxidase HPII(III) (catalase) (NCBI)	1736.76	1.62395	0.183909	8.83019	1.04498e-18	2.07975e-17	4.69197e-15	FALSE
BW25113_2107	rcnB	orf, hypothetical protein (VIMSS)	1885.61	1.59399	0.0896923	17.7717	1.17053e-70	7.18034e-69	5.2557e-67	FALSE
BW25113_1951	rcsA		832.07	1.57795	0.118256	13.3435	1.29291e-40	4.59498e-39	5.80519e-37	FALSE
BW25113_0753	ybgS	hypothetical protein (NCBI)	281.19	1.5761	0.263713	5.97657	2.27882e-09	2.29832e-08	1.02319e-05	FALSE
BW25113_1599	mdtI		254.278	1.56658	0.222518	7.04026	1.91887e-12	2.60426e-11	8.61572e-09	FALSE
BW25113_0839	dacC	D-alanyl-D-alanine carboxypeptidase (penicillin-binding protein 6a) (NCBI)	4706.19	1.5656	0.115203	13.5899	4.59769e-42	1.68758e-40	2.06436e-38	FALSE
BW25113_2922	yggE	hypothetical protein (NCBI)	7978.5	1.55834	0.0881346	17.6813	5.83919e-70	3.5335e-68	2.62179e-66	FALSE
BW25113_2059	wcaA	predicted glycosyl transferase (NCBI)	338.928	1.55022	0.191458	8.09691	5.63745e-16	9.45486e-15	2.53121e-12	FALSE
BW25113_2012	yeeD	hypothetical protein (NCBI)	1600.38	1.5428	0.613624	2.51425	0.0119288	0.0317203	53.5601	FALSE
BW25113_3055	ygiM	predicted signal transduction protein (SH3 domain) (NCBI)	4142.87	1.53669	0.205609	7.47382	7.79e-14	1.16668e-12	3.49771e-10	FALSE
BW25113_2777	queE	hypothetical protein (NCBI)	4331.01	1.53587	0.0990339	15.5085	3.0395e-54	1.4178e-52	1.36474e-50	FALSE
BW25113_3757	gltU		624.223	1.52483	0.293137	5.20176	1.97406e-07	1.53203e-06	0.000886353	FALSE
BW25113_2028	ugd	UDP-glucose 6-dehydrogenase (NCBI)	1953.89	1.5236	0.177305	8.59311	8.4647e-18	1.58598e-16	3.80065e-14	FALSE
BW25113_1455	yncH		2.33945	1.51393	1.37709	1.09937	0.271606	0.41624	1219.51	FALSE
BW25113_0747	lysY		2412.12	1.50529	0.307477	4.89563	9.79924e-07	6.82442e-06	0.00439986	FALSE
BW25113_4027	yjbF	orf, hypothetical protein (VIMSS)	114.157	1.50441	0.247897	6.06868	1.28962e-09	1.33679e-08	5.79039e-06	FALSE
BW25113_0376	ampH	beta-lactamase/D-alanine carboxypeptidase (NCBI)	3006.93	1.5041	0.246133	6.11091	9.90639e-10	1.03647e-08	4.44797e-06	FALSE
BW25113_0315	yahA	predicted DNA-binding transcriptional regulator (NCBI)	385493	1.48657	0.158295	9.39119	5.93261e-21	1.27722e-19	2.66374e-17	FALSE
BW25113_1112	bhsA		232.449	1.48284	0.244701	6.05978	1.36306e-09	1.40965e-08	6.12016e-06	FALSE
BW25113_1729	ydjN	predicted transporter (NCBI)	5717.96	1.47278	0.51044	2.88531	0.00391026	0.0120179	17.5571	FALSE
BW25113_0275	insA		230.176	1.47112	0.159587	9.2183	3.01837e-20	6.3756e-19	1.35525e-16	FALSE
BW25113_0293	ecpA	hypothetical protein (NCBI)	383.493	1.46907	0.121733	12.068	1.55897e-33	4.84798e-32	6.99979e-30	FALSE
BW25113_2666	yqaE	predicted membrane protein (NCBI)	263.269	1.46611	0.156342	9.37757	6.75103e-21	1.44646e-19	3.03121e-17	FALSE
BW25113_2174	lpxT	orf, hypothetical protein (VIMSS)	4017.37	1.46343	0.150411	9.72951	2.2567e-22	5.1823e-21	1.01326e-18	FALSE
BW25113_1614	ydgA	hypothetical protein (NCBI)	22965.8	1.46254	0.0706304	20.7069	3.00046e-95	2.63452e-93	1.34721e-91	FALSE
BW25113_1605	ydgI	predicted arginine/ornithine antiporter transporter (NCBI)	1668.91	1.45562	0.220569	6.5994	4.12834e-11	5.06485e-10	1.85362e-07	FALSE
BW25113_3932	hslV	ATP-dependent protease peptidase subunit (NCBI)	14919.6	1.45539	0.100028	14.5499	5.84857e-48	2.49428e-46	2.62601e-44	FALSE
BW25113_3541	dppD	dipeptide transporter (NCBI)	1602.66	1.45285	0.210249	6.91013	4.84223e-12	6.41524e-11	2.17416e-08	FALSE
BW25113_0749	lysQ		394.521	1.45065	0.371148	3.90855	9.28513e-05	0.000441389	0.416902	FALSE
BW25113_4008	gltV		566.467	1.44576	0.300392	4.81292	1.48737e-06	1.01069e-05	0.0066783	FALSE
BW25113_4603	rseX		2.42922	1.43833	1.17695	1.22208	0.221676	0.357073	995.324	FALSE
BW25113_2592	clpB	protein disaggregation chaperone (NCBI)	33999.2	1.43718	0.17057	8.42576	3.58422e-17	6.44583e-16	1.60931e-13	FALSE
BW25113_3400	hslR	ribosome-associated heat shock protein Hsp15 (NCBI)	8412.72	1.43408	0.0857979	16.7146	1.02657e-62	5.67531e-61	4.60932e-59	FALSE
BW25113_2057	wcaC	predicted glycosyl transferase (NCBI)	260.873	1.41509	0.19304	7.33053	2.29251e-13	3.33307e-12	1.02934e-09	FALSE
BW25113_0746	valZ	tRNA-Val (NCBI)	2939.96	1.41042	0.294789	4.7845	1.71416e-06	1.1491e-05	0.00769657	FALSE
BW25113_0970	yccA	inner membrane protein (NCBI)	17186	1.40477	0.0867761	16.1885	6.08267e-59	3.09525e-57	2.73112e-55	FALSE
BW25113_0748	lysZ		1578.4	1.40354	0.302308	4.64275	3.43804e-06	2.20538e-05	0.0154368	FALSE
BW25113_0014	dnaK	molecular chaperone DnaK (NCBI)	258639	1.3983	0.119505	11.7008	1.26325e-31	3.72161e-30	5.67201e-28	FALSE
BW25113_0161	degP	serine endoprotease (protease Do), membrane-associated (NCBI)	9350.51	1.38715	0.171555	8.08571	6.18049e-16	1.03269e-14	2.77504e-12	FALSE
BW25113_4359	opgB	phosphoglycerol transferase I (VIMSS)	10004.3	1.37822	0.144246	9.55461	1.24046e-21	2.77739e-20	5.56967e-18	FALSE
BW25113_3687	ibpA	heat shock chaperone (NCBI)	4518.35	1.37556	0.163585	8.40885	4.1405e-17	7.41646e-16	1.85908e-13	FALSE
BW25113_3917	sbp	sulfate transporter subunit (NCBI)	402.251	1.35574	0.27437	4.94129	7.7608e-07	5.51633e-06	0.0034846	FALSE
BW25113_2672	ygaM	orf, hypothetical protein (VIMSS)	673.771	1.34861	0.193202	6.98031	2.94526e-12	3.94876e-11	1.32242e-08	FALSE
BW25113_0453	ybaY	glycoprotein/polysaccharide metabolism (VIMSS)	2279.12	1.33901	0.0945895	14.1561	1.71353e-45	6.97563e-44	7.69376e-42	FALSE
BW25113_0473	htpG	heat shock protein 90 (NCBI)	66514.8	1.33493	0.112848	11.8295	2.74926e-32	8.26254e-31	1.23442e-28	FALSE
BW25113_2590	gltW		3873.12	1.33244	0.307005	4.34012	1.42403e-05	8.22814e-05	0.063939	FALSE
BW25113_0565	ompT	DLP12 prophage; outer membrane protease VII (outer membrane protein 3b) (NCBI)	24506.9	1.32364	0.0932351	14.1968	9.58543e-46	3.93794e-44	4.30386e-42	FALSE
BW25113_0048	folA		5295.18	1.32113	0.137115	9.63518	5.67897e-22	1.29089e-20	2.54986e-18	FALSE
BW25113_3931	hslU	ATP-dependent protease ATP-binding subunit (NCBI)	45966	1.30296	0.1031	12.6377	1.30761e-36	4.36974e-35	5.87115e-33	FALSE
BW25113_3853	alaT		355.043	1.30136	0.307125	4.23724	2.26287e-05	0.000124485	0.101603	FALSE
BW25113_3401	hslO	orf, hypothetical protein (VIMSS)	18003.1	1.29794	0.0944735	13.7387	5.9543e-43	2.27892e-41	2.67348e-39	FALSE
BW25113_0235	ykfJ	hypothetical protein (RefSeq)	9.44812	1.29325	0.636909	2.03051	0.0423045	0.0939679	189.947	FALSE
BW25113_1584	speG	spermidine N1-acetyltransferase (NCBI)	4355.29	1.29278	0.0781389	16.5446	1.7511e-61	9.56271e-60	7.86243e-58	FALSE
BW25113_3955	eptC	conserved inner membrane protein (NCBI)	11121	1.28516	0.106522	12.0647	1.62198e-33	5.00911e-32	7.28267e-30	FALSE
BW25113_0745	lysW		4856	1.27716	0.288137	4.43248	9.31538e-06	5.55449e-05	0.041826	FALSE
BW25113_0842	mdfA	multidrug efflux system protein (NCBI)	2851.16	1.27175	0.206222	6.1669	6.9641e-10	7.38987e-09	3.12688e-06	FALSE
BW25113_1535	dgcZ	hypothetical protein (NCBI)	832.037	1.27065	0.139112	9.134	6.60151e-20	1.35603e-18	2.96408e-16	FALSE
BW25113_3276	alaU		431.473	1.27021	0.324896	3.90958	9.24557e-05	0.000439975	0.415126	FALSE
BW25113_4601	ydgU		15.4721	1.26533	0.468181	2.70265	0.00687892	0.0195704	30.8864	FALSE
BW25113_1583	ynfB	hypothetical protein (NCBI)	3524.04	1.26434	0.0801669	15.7713	4.8995e-56	2.38478e-54	2.19988e-52	FALSE
BW25113_1627	rsxA	Na(+)-translocating NADH-quinone reductase subunit E (NCBI)	1319.66	1.26141	0.213425	5.91035	3.41391e-09	3.35252e-08	1.53284e-05	FALSE
BW25113_2021	hisC	histidinol-phosphate aminotransferase (NCBI)	66.6025	1.2592	0.382407	3.29282	0.000991881	0.00363473	4.45354	FALSE
BW25113_2047	wcaJ	predicted UDP-glucose lipid carrier transferase (NCBI)	289.498	1.25003	0.179447	6.96602	3.26023e-12	4.34503e-11	1.46384e-08	FALSE
BW25113_3852	ileT		624.5	1.24935	0.316322	3.94961	7.82786e-05	0.000379774	0.351471	FALSE
BW25113_2614	grpE	heat shock protein (NCBI)	42652.5	1.24927	0.0914648	13.6585	1.79681e-42	6.81874e-41	8.06768e-39	FALSE
BW25113_0527	ybcI	conserved inner membrane protein (NCBI)	257.79	1.24588	0.14125	8.82036	1.1409e-18	2.2606e-17	5.12265e-15	FALSE
BW25113_0875	aqpZ	aquaporin Z (NCBI)	520.708	1.24483	0.16538	7.52709	5.18855e-14	7.84943e-13	2.32966e-10	FALSE
BW25113_2404	lysV		498.846	1.24233	0.38225	3.25005	0.00115386	0.00414021	5.18083	FALSE
BW25113_0020	nhaR	DNA-binding transcriptional activator (NCBI)	1841.24	1.23561	0.0723827	17.0706	2.45833e-65	1.39347e-63	1.10379e-61	FALSE
BW25113_4164	glyX		1732.48	1.23484	0.594588	2.0768	0.0378202	0.0854053	169.813	FALSE
BW25113_0840	deoR	DNA-binding transcriptional repressor (NCBI)	2815.17	1.23372	0.106244	11.6121	3.57519e-31	1.04639e-29	1.60526e-27	FALSE
BW25113_3398	yrfF	predicted inner membrane protein (NCBI)	5830.36	1.23121	0.157568	7.81385	5.54665e-15	8.96675e-14	2.49045e-11	FALSE
BW25113_2258	arnF	putative transport/receptor protein (VIMSS)	857.164	1.22604	0.123056	9.9633	2.20626e-23	5.34035e-22	9.90612e-20	FALSE
BW25113_0673	metT		6923.81	1.22474	0.308366	3.9717	7.13612e-05	0.0003481	0.320412	FALSE
BW25113_1183	umuD	DNA polymerase V, subunit D (NCBI)	5.64105	1.22248	0.830335	1.47227	0.140947	0.249175	632.852	FALSE
BW25113_2691	argQ		1296.75	1.2218	0.339012	3.604	0.000313354	0.00130288	1.40696	FALSE
BW25113_1047	opgC	glucans biosynthesis protein (NCBI)	2433.99	1.2206	0.284397	4.29188	1.7717e-05	0.000100173	0.0795495	FALSE
BW25113_3969	gltT		4069.71	1.2173	0.30977	3.92968	8.50574e-05	0.000407848	0.381908	FALSE
BW25113_3151	yraQ	predicted permease (NCBI)	2919.56	1.21618	0.186768	6.51174	7.42854e-11	8.84707e-10	3.33541e-07	FALSE
BW25113_4165	glyY		807.702	1.21306	0.566899	2.13982	0.0323694	0.074871	145.339	FALSE
BW25113_3570	bax	hypothetical protein (NCBI)	7882.74	1.21304	0.159941	7.58428	3.34341e-14	5.16268e-13	1.50119e-10	FALSE
BW25113_3399	yrfG	putative phosphatase (VIMSS)	6287.19	1.21236	0.0814604	14.8828	4.26185e-50	1.85287e-48	1.91357e-46	FALSE
BW25113_1953	yodD	orf, hypothetical protein (VIMSS)	176.895	1.21003	0.245117	4.93657	7.951e-07	5.64257e-06	0.00357	FALSE
BW25113_2366	dsdA	D-serine dehydratase (NCBI)	2709.46	1.20879	0.68799	1.75698	0.0789207	0.155961	354.354	FALSE
BW25113_3277	ileU		805.337	1.20727	0.31604	3.81999	0.000133458	0.000609199	0.599226	FALSE
BW25113_0265	insA		259.952	1.20408	0.163991	7.34237	2.09843e-13	3.07083e-12	9.42193e-10	FALSE
BW25113_3728	pstS	phosphate transporter subunit (NCBI)	3800.53	1.20376	0.199566	6.03191	1.62035e-09	1.66421e-08	7.27539e-06	FALSE
BW25113_2419	yfeK	hypothetical protein (NCBI)	245.734	1.20121	0.237766	5.05207	4.37038e-07	3.21355e-06	0.0019623	FALSE
BW25113_1231	tyrT		1774.14	1.19843	0.384301	3.11847	0.00181795	0.00618131	8.1626	FALSE
BW25113_0744	valT		7178.75	1.19656	0.281239	4.25459	2.09429e-05	0.000116784	0.0940337	FALSE
BW25113_3615	waaH	predicted glycosyl transferase (NCBI)	316.618	1.19409	0.1749	6.82729	8.65322e-12	1.11992e-10	3.8853e-08	FALSE
BW25113_4143	groL		260118	1.19292	0.113436	10.5163	7.26852e-26	1.92594e-24	3.26356e-22	FALSE
BW25113_4142	groS		49428.9	1.19247	0.104024	11.4635	2.01251e-30	5.81326e-29	9.03615e-27	FALSE
BW25113_4425	rttR		566.951	1.18192	0.43142	2.73962	0.0061511	0.017725	27.6184	FALSE
BW25113_4315	fimI	fimbrial protein (VIMSS)	1019.83	1.18129	0.0866493	13.633	2.5493e-42	9.43451e-41	1.14464e-38	FALSE
BW25113_4163	glyV	tRNA-Gly (NCBI)	1761.53	1.17806	0.589692	1.99776	0.0457427	0.100164	205.385	FALSE
BW25113_1929	yedE	predicted inner membrane protein (NCBI)	7032.8	1.17762	0.241397	4.87835	1.06976e-06	7.41543e-06	0.0048032	FALSE
BW25113_0015	dnaJ	chaperone Hsp40, co-chaperone with DnaK (NCBI)	39014.3	1.17656	0.092391	12.7346	3.79669e-37	1.288e-35	1.70471e-33	FALSE
BW25113_1230	tyrV		1397.86	1.17279	0.383604	3.05731	0.00223336	0.00738625	10.0278	FALSE
BW25113_1055	yceA	hypothetical protein (NCBI)	4741.63	1.16661	0.28926	4.03309	5.50489e-05	0.000277288	0.247169	FALSE
BW25113_2570	rseC	RseC protein involved in reduction of the SoxR iron-sulfur cluster (NCBI)	2150.66	1.16408	0.189643	6.13825	8.34355e-10	8.81189e-09	3.74625e-06	FALSE
BW25113_4674	ynbG		1.09304	1.16328	2.09929	0.554129	0.579491	0.708811	2601.91	FALSE
BW25113_2817	amiC	putative amidase (VIMSS)	5295.63	1.16308	0.174578	6.66223	2.69708e-11	3.35799e-10	1.21099e-07	FALSE
BW25113_0666	metU		5268.02	1.16301	0.262524	4.43011	9.4184e-06	5.60846e-05	0.0422886	FALSE
BW25113_4483	tatD	DNase, magnesium-dependent (NCBI)	1498.16	1.1563	0.143155	8.07729	6.62241e-16	1.10242e-14	2.97346e-12	FALSE
BW25113_1586	ynfD	orf, hypothetical protein (VIMSS)	258.464	1.15413	0.193463	5.96563	2.43698e-09	2.43589e-08	1.0942e-05	FALSE
BW25113_1057	yceJ	predicted cytochrome b561 (NCBI)	203.079	1.13989	0.219919	5.18324	2.1806e-07	1.67779e-06	0.000979091	FALSE
BW25113_0659	ybeY		7885.84	1.13875	0.0919275	12.3875	3.05367e-35	9.83764e-34	1.3711e-31	FALSE
BW25113_0202	ileV		709.737	1.13704	0.314643	3.61375	0.000301795	0.00126067	1.35506	FALSE
BW25113_1014	putA	fused DNA-binding transcriptional regulator/proline dehydrogenase/pyrroline-5-carboxylate dehydrogenase (NCBI)	25816.8	1.13481	0.543465	2.0881	0.0367884	0.0836235	165.18	FALSE
BW25113_3194	mlaE	predicted toluene transporter subunit: membrane component of ABC superfamily (NCBI)	9342.94	1.13225	0.0796504	14.2152	7.37274e-46	3.05696e-44	3.31036e-42	FALSE
BW25113_3195	mlaF	predicted toluene transporter subunit: ATP-binding component of ABC superfamily (NCBI)	11215.7	1.132	0.0697692	16.2249	3.36031e-59	1.74971e-57	1.50878e-55	FALSE
BW25113_4316	fimC	periplasmic chaperone, required for type 1 fimbriae (VIMSS)	540.01	1.1304	0.174155	6.49076	8.54057e-11	1.00909e-09	3.83472e-07	FALSE
BW25113_4317	fimD	outer membrane usher protein, type 1 fimbrial synthesis (NCBI)	840.618	1.1303	0.115106	9.81963	9.26837e-23	2.17297e-21	4.1615e-19	FALSE
BW25113_2045	wcaK	predicted pyruvyl transferase (NCBI)	428.417	1.12342	0.196055	5.73012	1.0036e-08	9.38234e-08	4.50618e-05	FALSE
BW25113_4140	fxsA	orf, hypothetical protein (VIMSS)	2021.95	1.1225	0.0805101	13.9424	3.50175e-44	1.38768e-42	1.57228e-40	FALSE
BW25113_3709	tnaB	tryptophan transporter of low affinity (NCBI)	463.126	1.11863	0.692363	1.61567	0.106166	0.199684	476.685	FALSE
BW25113_2403	valY		679.766	1.11694	0.350134	3.19003	0.00142258	0.00497681	6.38739	FALSE
BW25113_1537	ydeJ	competence damage-inducible protein A (NCBI)	147.45	1.11605	0.221485	5.03894	4.68119e-07	3.43083e-06	0.00210185	FALSE
BW25113_0743	lysT		11647.9	1.11135	0.28541	3.89387	9.86568e-05	0.000465822	0.442969	FALSE
BW25113_0898	ycaD	putative MFS family transporter protein (NCBI)	998.642	1.11041	0.228237	4.86517	1.14359e-06	7.915e-06	0.00513473	FALSE
BW25113_0631	ybeD		4152.55	1.10953	0.113163	9.80466	1.07513e-22	2.50751e-21	4.82733e-19	FALSE
BW25113_3343	tusB		1833.42	1.10807	0.0837451	13.2315	5.77315e-40	2.0356e-38	2.59215e-36	FALSE
BW25113_3089	sstT	sodium:serine/threonine symporter (NCBI)	4333.68	1.10731	0.154971	7.14524	8.98396e-13	1.24938e-11	4.0338e-09	FALSE
BW25113_0154	hemL		16457.5	1.09918	0.0610908	17.9925	2.23019e-72	1.44736e-70	1.00136e-68	FALSE
BW25113_0897	ycaC	predicted hydrolase (NCBI)	894.088	1.09817	0.300708	3.65194	0.000260263	0.00111634	1.16858	FALSE
BW25113_3540	dppF	dipeptide transporter (NCBI)	1625.51	1.09255	0.0894006	12.2209	2.40431e-34	7.52902e-33	1.07953e-30	FALSE
BW25113_2560	pgpC	orf, hypothetical protein (VIMSS)	2239.26	1.09051	0.162274	6.72017	1.81514e-11	2.2961e-10	8.14996e-08	FALSE
BW25113_0660	ybeZ	predicted protein with nucleoside triphosphate hydrolase domain (RefSeq)	15186.8	1.08967	0.0916538	11.889	1.35017e-32	4.08517e-31	6.06226e-29	FALSE
BW25113_2259	pmrD	polymyxin resistance protein B (VIMSS)	1505.13	1.08853	0.126217	8.62424	6.45198e-18	1.21395e-16	2.89694e-14	FALSE
BW25113_4314	fimA	major type 1 subunit fimbrin (pilin) (NCBI)	9978.49	1.07368	0.0787167	13.6399	2.32036e-42	8.65883e-41	1.04184e-38	FALSE
BW25113_0492	ybbN	putative thioredoxin-like protein (VIMSS)	9919.68	1.07281	0.125795	8.52822	1.48622e-17	2.7388e-16	6.67313e-14	FALSE
BW25113_2692	argZ		2675.26	1.07008	0.310653	3.44463	0.000571852	0.00223842	2.56761	FALSE
BW25113_0203	alaV		427.383	1.0692	0.293939	3.63748	0.000275319	0.00117641	1.23618	FALSE
BW25113_1287	yciW	putative oxidoreductase (VIMSS)	580.468	1.06872	0.16275	6.56665	5.14592e-11	6.24483e-10	2.31052e-07	FALSE
BW25113_3796	argX		2909.02	1.06653	0.337672	3.15848	0.00158595	0.00547525	7.12092	FALSE
BW25113_2396	alaX		106.123	1.06434	0.378448	2.81239	0.00491755	0.014593	22.0798	FALSE
BW25113_2389	yfeO	hypothetical protein (NCBI)	1116.3	1.06311	0.10018	10.612	2.62043e-26	6.9847e-25	1.17657e-22	FALSE
BW25113_3797	hisR		5025.66	1.05985	0.328163	3.22965	0.00123941	0.00440832	5.56495	FALSE
BW25113_0211	mltD	predicted membrane-bound lytic murein transglycosylase D (NCBI)	15366	1.05913	0.176022	6.01703	1.7765e-09	1.8204e-08	7.97647e-06	FALSE
BW25113_3498	prlC	oligopeptidase A (NCBI)	18113	1.05754	0.121438	8.70842	3.08142e-18	5.89683e-17	1.38356e-14	FALSE
BW25113_0598	cstA	carbon starvation protein (NCBI)	9473.38	1.05733	0.267156	3.95773	7.56652e-05	0.000367493	0.339737	FALSE
BW25113_2401	valU		394.228	1.0535	0.343721	3.06498	0.00217687	0.00723684	9.77414	FALSE
BW25113_3497	rsmJ	predicted SAM-dependent methyltransferase (NCBI)	2334.59	1.04862	0.082823	12.661	9.72208e-37	3.27334e-35	4.36521e-33	FALSE
BW25113_1056	yceI	hypothetical protein (NCBI)	1127.24	1.04856	0.0982427	10.6732	1.35917e-26	3.68871e-25	6.10268e-23	FALSE
BW25113_4701	sokX		3.4237	1.04311	0.864585	1.20648	0.227631	0.363131	1022.06	FALSE
BW25113_3798	leuT		6136.92	1.0328	0.321893	3.20851	0.00133425	0.00471567	5.99077	FALSE
BW25113_3730	glmU		26467.3	1.03231	0.0945452	10.9187	9.37938e-28	2.60875e-26	4.21134e-24	FALSE
BW25113_0883	serW		67.7914	1.02804	0.4621	2.22471	0.0261008	0.06267	117.193	FALSE
BW25113_1907	tyrP	tyrosine transporter (NCBI)	1893.87	1.0253	0.176883	5.79648	6.77201e-09	6.3977e-08	3.04063e-05	FALSE
BW25113_1739	osmE	DNA-binding transcriptional activator (NCBI)	1827.2	1.02439	0.141314	7.24906	4.19681e-13	6.00426e-12	1.88437e-09	FALSE
BW25113_3635	mutM	formamidopyrimidine-DNA glycosylase (NCBI)	2271.06	1.02251	0.08671	11.7923	4.27723e-32	1.2769e-30	1.92048e-28	FALSE
BW25113_2693	argY		3765.77	1.01624	0.295404	3.44018	0.000581338	0.00226565	2.61021	FALSE
BW25113_3038	ygiC	predicted enzyme (NCBI)	13422.8	1.01417	0.11159	9.0883	1.00602e-19	2.0477e-18	4.51701e-16	FALSE
BW25113_0778	bioD	dethiobiotin synthetase (NCBI)	171.192	1.01172	0.170385	5.93785	2.88778e-09	2.88006e-08	1.29661e-05	FALSE
BW25113_3037	ygiB	conserved outer membrane protein (RefSeq)	7844.7	1.00832	0.105867	9.52439	1.66012e-21	3.69851e-20	7.45393e-18	FALSE
BW25113_0777	bioC	predicted methltransferase, enzyme of biotin synthesis (NCBI)	153.227	1.00735	0.230796	4.36469	1.27304e-05	7.3939e-05	0.0571597	FALSE
BW25113_0465	mscK	fused conserved protein (NCBI)	8891.05	1.00722	0.0991313	10.1605	2.97561e-24	7.52812e-23	1.33605e-20	FALSE
BW25113_1989	asnV	tRNA-Asn (NCBI)	24.1287	1.00583	0.576966	1.7433	0.0812807	0.159848	364.95	FALSE
BW25113_1482	osmC	osmotically inducible, stress-inducible membrane protein (NCBI)	1263.28	1.00228	0.158309	6.33118	2.43299e-10	2.73742e-09	1.09241e-06	FALSE
BW25113_0691	ybfG	orf, hypothetical protein (VIMSS)	74.4172	0.998946	0.251502	3.97193	7.1293e-05	0.0003481	0.320106	FALSE
BW25113_0871	poxB	pyruvate dehydrogenase (NCBI)	1157.9	0.99623	0.203228	4.90203	9.48507e-07	6.64697e-06	0.0042588	FALSE
BW25113_0814	ompX	outer membrane protein X (NCBI)	146586	0.990964	0.110592	8.96052	3.23152e-19	6.48913e-18	1.45095e-15	FALSE
BW25113_0789	clsB	cardiolipin synthase 2 (NCBI)	122.76	0.988721	0.236287	4.1844	2.85917e-05	0.000154072	0.128377	FALSE
BW25113_1821	mntP	orf, hypothetical protein (VIMSS)	251.255	0.987886	0.20639	4.78651	1.69707e-06	1.13935e-05	0.00761986	FALSE
BW25113_1024	pgaA	predicted outer membrane protein (NCBI)	445.657	0.986676	0.128251	7.69335	1.43337e-14	2.25216e-13	6.43585e-11	FALSE
BW25113_0622	pagP	palmitoyl transferase for Lipid A (NCBI)	285.247	0.981263	0.239502	4.09709	4.18368e-05	0.000218097	0.187847	FALSE
BW25113_1930	yedF	hypothetical protein (NCBI)	2110.71	0.978214	0.229004	4.2716	1.94076e-05	0.000108512	0.0871401	FALSE
BW25113_1700	ydiT		17.2721	0.978107	0.498459	1.96226	0.0497322	0.107326	223.297	FALSE
BW25113_3544	dppA	dipeptide transporter (NCBI)	13887.5	0.978049	0.316362	3.09155	0.00199117	0.006684	8.94035	FALSE
BW25113_4544	arnE	hypothetical protein (NCBI)	6.97415	0.967295	0.599575	1.6133	0.106679	0.200381	478.988	FALSE
BW25113_4594	ymgJ	hypothetical protein (RefSeq)	8.82669	0.966798	0.634339	1.5241	0.127483	0.230096	572.399	FALSE
BW25113_0401	brnQ	predicted branched chain amino acid transporter (LIV-II) (NCBI)	4144.91	0.962173	0.0983492	9.78322	1.32907e-22	3.08371e-21	5.96751e-19	FALSE
BW25113_1010	rutC	hypothetical protein (NCBI)	21.4098	0.96067	0.665644	1.44322	0.148959	0.259851	668.826	FALSE
BW25113_2559	tadA		1795.34	0.959468	0.16992	5.64659	1.63658e-08	1.48654e-07	7.34826e-05	FALSE
BW25113_0657	lnt		6517.38	0.958897	0.14328	6.69248	2.19427e-11	2.75236e-10	9.85227e-08	FALSE
BW25113_2073	yegL	hypothetical protein (NCBI)	133.827	0.95772	0.765588	1.25096	0.210949	0.342381	947.16	FALSE
BW25113_1645	ydhK	conserved inner membrane protein (NCBI)	788.385	0.956062	0.148581	6.43461	1.23789e-10	1.43608e-09	5.55813e-07	FALSE
BW25113_0439	lon	DNA-binding ATP-dependent protease La (NCBI)	114640	0.952714	0.0907204	10.5017	8.48789e-26	2.23581e-24	3.81106e-22	FALSE
BW25113_2509	xseA	exodeoxyribonuclease VII large subunit (NCBI)	4328.44	0.951295	0.180602	5.26737	1.38395e-07	1.09494e-06	0.000621395	FALSE
BW25113_2209	eco	ecotin precursor (NCBI)	7885.68	0.950364	0.0946898	10.0366	1.05236e-23	2.61804e-22	4.7251e-20	FALSE
BW25113_1628	rsxB	electron transport complex protein RnfB (NCBI)	1826.33	0.94619	0.222689	4.24893	2.14793e-05	0.000118765	0.0964419	FALSE
BW25113_3193	mlaD	predicted ABC-type organic solvent transporter (NCBI)	8794.89	0.942386	0.0693507	13.5887	4.67246e-42	1.70108e-40	2.09793e-38	FALSE
BW25113_4630	ykgP		2.77451	0.941365	1.19479	0.787889	0.430761	0.580699	1934.12	FALSE
BW25113_2816	metV		744.057	0.937785	0.361495	2.59419	0.00948147	0.0260218	42.5718	FALSE
BW25113_2081	yegQ	predicted peptidase (NCBI)	6337.41	0.934093	0.23211	4.02436	5.71301e-05	0.000286482	0.256514	FALSE
BW25113_1063	yceB	predicted lipoprotein (NCBI)	1769.46	0.931404	0.0937873	9.93103	3.05097e-23	7.30602e-22	1.36989e-19	FALSE
BW25113_3192	mlaC	predicted ABC-type organic solvent transporter (NCBI)	11690.9	0.928193	0.0734953	12.6293	1.45594e-36	4.82941e-35	6.53718e-33	FALSE
BW25113_2414	cysK	cysteine synthase A, O-acetylserine sulfhydrolase A subunit (NCBI)	12734.6	0.925004	0.231065	4.00323	6.24842e-05	0.000309518	0.280554	FALSE
BW25113_3171	metY		677.449	0.919508	0.377924	2.43305	0.0149722	0.0387188	67.2251	FALSE
BW25113_0485	glsA	predicted glutaminase (NCBI)	141.642	0.917691	0.296792	3.09204	0.00198786	0.0066779	8.92549	FALSE
BW25113_4368	leuV		643.605	0.916372	0.386075	2.37356	0.0176174	0.0448167	79.1022	FALSE
BW25113_2558	mltF	predicted periplasmic binding protein/transglycosylase (RefSeq)	1041.48	0.916182	0.206631	4.43391	9.25409e-06	5.53269e-05	0.0415509	FALSE
BW25113_3515	gadW	DNA-binding transcriptional activator (NCBI)	689.728	0.915652	0.104588	8.75489	2.04298e-18	3.96037e-17	9.17298e-15	FALSE
BW25113_0855	potG	ATP-binding component of putrescine transport system (VIMSS)	180.034	0.911232	0.239989	3.79697	0.000146476	0.000663216	0.657678	FALSE
BW25113_3174	leuU		1793.26	0.909659	0.220371	4.12785	3.66176e-05	0.000192457	0.164413	FALSE
BW25113_1515	lsrD	AI2 transporter (NCBI)	63.8795	0.908101	0.284179	3.19552	0.00139579	0.00489838	6.26708	FALSE
BW25113_3175	secG		31000.7	0.906774	0.225945	4.01325	5.98881e-05	0.00029864	0.268897	FALSE
BW25113_2020	hisD	histidinol dehydrogenase (NCBI)	7184.83	0.90637	0.125581	7.21742	5.29828e-13	7.50813e-12	2.37893e-09	FALSE
BW25113_3799	proM		578.197	0.906363	0.337832	2.68288	0.00729902	0.0206214	32.7726	FALSE
BW25113_0790	ybhP	predicted DNase (NCBI)	102.521	0.905756	0.238625	3.79572	0.000147215	0.000665888	0.660996	FALSE
BW25113_3179	rlmE		18320.9	0.900402	0.0652842	13.7921	2.84548e-43	1.10801e-41	1.27762e-39	FALSE
BW25113_4062	soxS	DNA-binding transcriptional dual regulator (NCBI)	481.29	0.90028	0.14693	6.12729	8.93912e-10	9.39657e-09	4.01366e-06	FALSE
BW25113_0858	ybjO	predicted inner membrane protein (NCBI)	319.418	0.897631	0.151503	5.92484	3.12608e-09	3.09703e-08	1.40361e-05	FALSE
BW25113_3552	yiaD	predicted outer membrane lipoprotien (NCBI)	3710.08	0.896524	0.0976516	9.18083	4.27762e-20	8.90939e-19	1.92065e-16	FALSE
BW25113_3727	pstC	phosphate transporter subunit (NCBI)	1630.48	0.894284	0.143619	6.22677	4.76141e-10	5.15014e-09	2.13787e-06	FALSE
BW25113_2273	yfbN		35.0696	0.893173	0.457089	1.95405	0.0506958	0.109195	227.624	FALSE
BW25113_0672	leuW		8725.08	0.892651	0.26158	3.41254	0.000643604	0.00249098	2.88978	FALSE
BW25113_1129	phoQ		13.0646	0.891376	0.515812	1.7281	0.0839698	0.1642	377.025	FALSE
BW25113_0876	ybjD	conserved protein with nucleoside triphosphate hydrolase domain (NCBI)	3418.48	0.890491	0.0872291	10.2086	1.81377e-24	4.66786e-23	8.14384e-21	FALSE
BW25113_1601	tqsA	predicted inner membrane protein (NCBI)	458.759	0.885192	0.215754	4.10278	4.08222e-05	0.000213056	0.183292	FALSE
BW25113_0819	ldtB	hypothetical protein (NCBI)	8462.75	0.884988	0.113531	7.79513	6.43433e-15	1.03644e-13	2.88901e-11	FALSE
BW25113_0702	ybfB		12.9418	0.884071	0.585648	1.50956	0.131156	0.235102	588.89	FALSE
BW25113_4683	yqeL		2.83103	0.878387	1.05276	0.834368	0.404074	0.556409	1814.29	FALSE
BW25113_3394	hofN	predicted fimbrial assembly protein (NCBI)	8.64435	0.873976	0.571235	1.52998	0.126023	0.22792	565.843	FALSE
BW25113_1243	oppA	oligopeptide transporter subunit (NCBI)	74324.4	0.872901	0.114351	7.63351	2.28446e-14	3.55201e-13	1.02572e-10	FALSE
BW25113_2694	argV		7553.68	0.872126	0.269838	3.23204	0.0012291	0.00437862	5.51868	FALSE
BW25113_0892	rarA	recombination protein (NCBI)	5448.48	0.865524	0.0811353	10.6677	1.44218e-26	3.89042e-25	6.47541e-23	FALSE
BW25113_4171	miaA	tRNA delta(2)-isopentenylpyrophosphate transferase (NCBI)	33322.1	0.862734	0.0695237	12.4092	2.32918e-35	7.55801e-34	1.0458e-31	FALSE
BW25113_1158	pinE	e14 prophage; site-specific DNA recombinase (NCBI)	23.6773	0.860941	0.434631	1.98085	0.0476076	0.103465	213.758	FALSE
BW25113_0664	glnX		2153	0.860915	0.229979	3.74345	0.000181507	0.000807942	0.814967	FALSE
BW25113_1114	mfd	transcription-repair coupling factor (NCBI)	12029.9	0.857282	0.103695	8.26734	1.36977e-16	2.37745e-15	6.15025e-13	FALSE
BW25113_0859	rlmC	23S rRNA m(5)U747-methyltransferase (NCBI)	1804.02	0.850589	0.218178	3.89861	9.67478e-05	0.000457967	0.434397	FALSE
BW25113_1445	ydcX		173.065	0.850089	0.282153	3.01286	0.00258798	0.00842221	11.62	FALSE
BW25113_1424	opgD	glucan biosynthesis protein, periplasmic (RefSeq)	6725.75	0.849771	0.118211	7.1886	6.54574e-13	9.24663e-12	2.93904e-09	FALSE
BW25113_1414	ydcF	hypothetical protein (NCBI)	1295.58	0.848806	0.108408	7.82971	4.89001e-15	7.93386e-14	2.19561e-11	FALSE
BW25113_2340	sixA	phosphohistidine phosphatase (NCBI)	3336.98	0.847906	0.200799	4.22265	2.41441e-05	0.000132173	0.108407	FALSE
BW25113_0238	gpt	xanthine phosphoribosyltransferase (NCBI)	4792.47	0.843263	0.206226	4.08901	4.33209e-05	0.000225309	0.194511	FALSE
BW25113_0635	mrdA		8472.23	0.843212	0.207892	4.05601	4.99181e-05	0.000254884	0.224132	FALSE
BW25113_0906	ycaP	conserved inner membrane protein (NCBI)	249.817	0.842455	0.200574	4.20022	2.66658e-05	0.000144214	0.119729	FALSE
BW25113_0291	ecpC	predicted aromatic compound dioxygenase (NCBI)	363.835	0.838897	0.164481	5.10026	3.39186e-07	2.53993e-06	0.00152295	FALSE
BW25113_1022	pgaC	predicted glycosyl transferase (NCBI)	168.398	0.837208	0.150031	5.58023	2.40207e-08	2.13846e-07	0.000107853	FALSE
BW25113_2571	rseB	periplasmic negative regulator of sigmaE (NCBI)	99.5958	0.836627	0.296056	2.82591	0.00471464	0.0140935	21.1687	FALSE
BW25113_0155	clcA	chloride channel protein (NCBI)	2863.32	0.836501	0.150183	5.56988	2.54918e-08	2.25598e-07	0.000114458	FALSE
BW25113_4514	ybfQ		5.86199	0.836026	1.17729	0.710126	0.477626	0.623378	2144.54	FALSE
BW25113_3293	yhdN	hypothetical protein (NCBI)	963.051	0.834923	0.114399	7.29832	2.91383e-13	4.20907e-12	1.30831e-09	FALSE
BW25113_0665	glnV		3373.6	0.834458	0.216477	3.85472	0.000115861	0.000535423	0.520215	FALSE
BW25113_2072	yegK	hypothetical protein (NCBI)	78.0654	0.832411	0.314672	2.64533	0.0081611	0.0228552	36.6433	FALSE
BW25113_2741	rpoS	RNA polymerase sigma factor (NCBI)	41348.4	0.830489	0.142373	5.83317	5.43833e-09	5.21474e-08	2.44181e-05	FALSE
BW25113_4552	yrhC		26.5873	0.825317	0.350275	2.35619	0.0184633	0.0465271	82.9002	FALSE
BW25113_0658	ybeX		15026.7	0.825105	0.0799518	10.32	5.72089e-25	1.48943e-23	2.56868e-21	FALSE
BW25113_2753	iap	aminopeptidase in alkaline phosphatase isozyme conversion (NCBI)	1291.65	0.825068	0.0970408	8.50228	1.85904e-17	3.38406e-16	8.34708e-14	FALSE
BW25113_2421	cysM	cysteine synthase B (O-acetylserine sulfhydrolase B) (NCBI)	2990.22	0.824941	0.204889	4.02627	5.66678e-05	0.000284482	0.254438	FALSE
BW25113_0737	tolQ	membrane spanning protein in TolA-TolQ-TolR complex (NCBI)	5490.96	0.824408	0.183418	4.49469	6.96722e-06	4.27386e-05	0.0312828	FALSE
BW25113_2599	pheA	fused chorismate mutase P/prephenate dehydratase (NCBI)	13846.4	0.822873	0.147388	5.58304	2.3635e-08	2.10832e-07	0.000106121	FALSE
BW25113_3460	livJ	leucine/isoleucine/valine transporter subunit (NCBI)	1590.46	0.821047	0.238726	3.43928	0.000583266	0.00227119	2.61887	FALSE
BW25113_2465	tktB	transketolase 2, thiamin-binding (NCBI)	2385.57	0.82078	0.129113	6.35705	2.05669e-10	2.33161e-09	9.23455e-07	FALSE
BW25113_3977	tyrU	tRNA-Tyr (NCBI)	13500.8	0.818352	0.170835	4.79031	1.66524e-06	1.11966e-05	0.00747693	FALSE
BW25113_4542	yohO		41.8215	0.817642	0.325609	2.51112	0.0120349	0.0319268	54.0368	FALSE
BW25113_3084	rlmG	putative enzyme (VIMSS)	2335.96	0.817023	0.224126	3.64538	0.000266999	0.00114304	1.19883	FALSE
BW25113_2046	wzxC	colanic acid exporter (NCBI)	285.685	0.814569	0.172215	4.72995	2.2458e-06	1.48768e-05	0.0100837	FALSE
BW25113_4646	yrdE		236.995	0.813739	0.269189	3.02293	0.00250339	0.00819352	11.2402	FALSE
BW25113_1086	rluC	23S rRNA pseudouridylate synthase (NCBI)	10156.4	0.811121	0.185368	4.37573	1.21029e-05	7.06607e-05	0.054342	FALSE
BW25113_0670	glnU		8941.44	0.810082	0.228511	3.54504	0.000392554	0.00159371	1.76257	FALSE
BW25113_0868	ybjS	putative nucleotide di-P-sugar epimerase or dehydratase (VIMSS)	2256.65	0.809334	0.129993	6.22599	4.78529e-10	5.1635e-09	2.1486e-06	FALSE
BW25113_0550	rusA	DLP12 prophage; endonuclease RUS (NCBI)	13.4224	0.807923	0.555812	1.45359	0.14606	0.255791	655.81	FALSE
BW25113_1987	cbl	DNA-binding transcriptional activator of cysteine biosynthesis (NCBI)	345.58	0.807737	0.207945	3.88437	0.000102594	0.000481062	0.460645	FALSE
BW25113_4512	ybdD		433.354	0.806937	0.20433	3.94919	7.84156e-05	0.000380027	0.352086	FALSE
BW25113_4679	yohP	expressed protein (RefSeq)	17.375	0.806069	0.490268	1.64414	0.100147	0.190267	449.661	FALSE
BW25113_3716	cbrB	predicted inner membrane protein (NCBI)	247.864	0.804748	0.223998	3.59266	0.000327317	0.00134997	1.46965	FALSE
BW25113_4197	ulaE	L-xylulose 5-phosphate 3-epimerase (NCBI)	308.469	0.804011	0.926014	0.868249	0.385258	0.536939	1729.81	FALSE
BW25113_0668	glnW		8391.89	0.797133	0.229931	3.46684	0.000526624	0.00207225	2.36454	FALSE
BW25113_2130	yehY	predicted transporter subunit: membrane component of ABC superfamily (NCBI)	177.715	0.795781	0.160687	4.95236	7.33201e-07	5.24485e-06	0.00329207	FALSE
BW25113_4536	yobH	hypothetical protein (NCBI)	763.051	0.791648	0.139404	5.6788	1.35645e-08	1.24726e-07	6.09045e-05	FALSE
BW25113_3859	srkA	predicted kinase (NCBI)	6325.36	0.789269	0.0688279	11.4673	1.92591e-30	5.60013e-29	8.64731e-27	FALSE
BW25113_1069	murJ		2700.48	0.789204	0.185584	4.25255	2.1135e-05	0.000117277	0.0948961	FALSE
BW25113_1896	otsA	trehalose-6-phosphate synthase (NCBI)	855.463	0.787026	0.118135	6.66209	2.69959e-11	3.35799e-10	1.21211e-07	FALSE
BW25113_1480	sra	30S ribosomal subunit protein S22 (NCBI)	960.553	0.786478	0.135277	5.81383	6.10604e-09	5.80528e-08	2.74161e-05	FALSE
BW25113_2140	dusC	tRNA-dihydrouridine synthase C (NCBI)	1185.72	0.783893	0.169552	4.62332	3.77646e-06	2.41241e-05	0.0169563	FALSE
BW25113_4173	hflX	predicted GTPase (NCBI)	22434	0.783595	0.0683589	11.4629	2.02517e-30	5.81326e-29	9.09299e-27	FALSE
BW25113_1244	oppB	oligopeptide permease ABC transporter membrane protein (NCBI)	14769.9	0.782916	0.106709	7.33694	2.18532e-13	3.18757e-12	9.81207e-10	FALSE
BW25113_2695	serV		12431.9	0.782333	0.255587	3.06093	0.00220654	0.00732461	9.90738	FALSE
BW25113_3739	atpI	membrane-bound ATP synthase, dispensable protein, affects expression of atpB (VIMSS)	11061.2	0.781965	0.168086	4.65218	3.2844e-06	2.11619e-05	0.014747	FALSE
BW25113_0399	phoB	DNA-binding response regulator in two-component regulatory system with PhoR (or CreC) (NCBI)	1099.38	0.780783	0.12285	6.35556	2.0767e-10	2.34835e-09	9.32439e-07	FALSE
BW25113_3275	rrlD		302599	0.780037	0.519487	1.50155	0.133212	0.238039	598.124	FALSE
BW25113_2589	rrlG		327506	0.779755	0.515112	1.51376	0.130087	0.233385	584.091	FALSE
BW25113_1959	yedA	predicted inner membrane protein (NCBI)	759.572	0.776635	0.102903	7.54729	4.44417e-14	6.76904e-13	1.99543e-10	FALSE
BW25113_3976	thrU		6507.69	0.776519	0.182272	4.26022	2.04224e-05	0.000114029	0.0916965	FALSE
BW25113_3854	rrlA		320995	0.77593	0.517799	1.49852	0.133999	0.238873	601.657	FALSE
BW25113_0874	ybjE	putative surface protein (VIMSS)	926.175	0.774597	0.187204	4.13771	3.50791e-05	0.000185679	0.157505	FALSE
BW25113_2533	suhB		9938.15	0.77459	0.302747	2.55854	0.0105112	0.0283379	47.1953	FALSE
BW25113_3690	cbrA	orf, hypothetical protein (VIMSS)	148.831	0.771329	0.163492	4.71785	2.38346e-06	1.57421e-05	0.0107017	FALSE
BW25113_3842	rfaH	transcriptional activator RfaH (NCBI)	1388.39	0.768972	0.232599	3.306	0.000946382	0.0035024	4.24926	FALSE
BW25113_0849	grxA	glutaredoxin 1, redox coenzyme for ribonucleotide reductase (RNR1a) (NCBI)	599.077	0.768234	0.15307	5.01885	5.19814e-07	3.76655e-06	0.00233396	FALSE
BW25113_0891	lolA		6204.68	0.765723	0.0767616	9.97534	1.95434e-23	4.78225e-22	8.77496e-20	FALSE
BW25113_4487	yjdP	hypothetical protein (NCBI)	556.133	0.764436	0.270875	2.8221	0.00477099	0.0142335	21.4217	FALSE
BW25113_0496	ybbP	predicted inner membrane protein (NCBI)	1101.29	0.764093	0.116738	6.54534	5.93606e-11	7.14562e-10	2.66529e-07	FALSE
BW25113_4369	leuP	tRNA-Leu (NCBI)	1386.28	0.763139	0.293989	2.5958	0.009437	0.0259257	42.3721	FALSE
BW25113_0636	rlmH	hypothetical protein (NCBI)	4652.14	0.76295	0.188055	4.05706	4.9694e-05	0.000254029	0.223126	FALSE
BW25113_0204	rrlH		291024	0.76267	0.505304	1.50933	0.131215	0.235102	589.154	FALSE
BW25113_2742	nlpD	predicted outer membrane lipoprotein (NCBI)	30237.8	0.760618	0.119432	6.36861	1.90744e-10	2.1679e-09	8.56441e-07	FALSE
BW25113_0815	ybiP	predicted hydrolase, inner membrane (NCBI)	1574.44	0.7602	0.215036	3.53523	0.000407424	0.00164959	1.82933	FALSE
BW25113_4423	ldrC		53.9311	0.758484	0.293978	2.58007	0.00987797	0.0270046	44.3521	FALSE
BW25113_1986	asnU		36.8952	0.75793	0.43017	1.76193	0.0780811	0.154506	350.584	FALSE
BW25113_2518	ndk	nucleoside diphosphate kinase (NCBI)	12112.4	0.757056	0.287314	2.63495	0.00841501	0.0234781	37.7834	FALSE
BW25113_3930	menA	1,4-dihydroxy-2-naphthoate octaprenyltransferase (NCBI)	2575.1	0.755229	0.111436	6.77722	1.2251e-11	1.58098e-10	5.5007e-08	FALSE
BW25113_4009	rrlE		244890	0.753484	0.507195	1.48559	0.137388	0.243942	616.871	FALSE
BW25113_2211	yojI	fused predicted multidrug transport subunits of ABC superfamily: membrane component/ATP-binding component (NCBI)	4982.52	0.753361	0.201172	3.74487	0.000180489	0.00080501	0.810396	FALSE
BW25113_0016	insL1		8129.07	0.75304	0.0892914	8.43352	3.35421e-17	6.05651e-16	1.50604e-13	FALSE
BW25113_0639	nadD		2375.54	0.752463	0.109153	6.89366	5.43757e-12	7.1406e-11	2.44147e-08	FALSE
BW25113_0736	ybgC	predicted acyl-CoA thioesterase (NCBI)	2943.3	0.750957	0.20509	3.66159	0.000250652	0.00107821	1.12543	FALSE
BW25113_4134	pheU		25.5822	0.749547	0.491245	1.52581	0.127057	0.229697	570.485	FALSE
BW25113_3758	rrlC		372169	0.749427	0.506087	1.48083	0.138653	0.245702	622.552	FALSE
BW25113_4383	deoB	phosphopentomutase (NCBI)	63830.9	0.747452	0.106445	7.02199	2.18737e-12	2.95032e-11	9.8213e-09	FALSE
BW25113_3963	fabR	DNA-binding transcriptional repressor (RefSeq)	9789.94	0.746116	0.0851559	8.76177	1.92208e-18	3.74221e-17	8.63014e-15	FALSE
BW25113_3002	yqhA	hypothetical protein (NCBI)	4198.35	0.743839	0.103653	7.17622	7.16666e-13	1.00603e-11	3.21783e-09	FALSE
BW25113_1574	dicF		5.33519	0.741985	0.761652	0.974179	0.329968	0.480878	1481.55	FALSE
BW25113_3970	rrlB		300559	0.740097	0.503999	1.46845	0.141982	0.250585	637.5	FALSE
BW25113_1643	ydhI	predicted inner membrane protein (NCBI)	193.124	0.739816	0.253301	2.9207	0.00349248	0.0109061	15.6812	FALSE
BW25113_3262	yhdJ	putative methyltransferase (VIMSS)	215.681	0.738776	0.218935	3.3744	0.000739766	0.00280973	3.32155	FALSE
BW25113_0835	rimO	predicted SAM-dependent methyltransferase (NCBI)	6567.29	0.738441	0.201031	3.67327	0.00023947	0.00103608	1.07522	FALSE
BW25113_1814	sdaA	L-serine deaminase I (NCBI)	16203.1	0.736579	0.177457	4.15075	3.3139e-05	0.000176663	0.148794	FALSE
BW25113_0738	tolR	membrane spanning protein in TolA-TolQ-TolR complex (NCBI)	3189.28	0.736232	0.190166	3.87152	0.000108157	0.000504508	0.485626	FALSE
BW25113_4045	yjbJ	predicted stress response protein (NCBI)	1002.39	0.736195	0.112073	6.5689	5.06889e-11	6.16806e-10	2.27593e-07	FALSE
BW25113_1615	uidC	membrane-associated protein (VIMSS)	73.5586	0.735879	0.376784	1.95306	0.050813	0.109342	228.15	FALSE
BW25113_1297	puuA	putative glutamine synthetase (EC 6.3.1.2) (VIMSS)	875.312	0.73326	0.271066	2.70509	0.00682854	0.0194801	30.6602	FALSE
BW25113_4370	leuQ	tRNA-Leu (NCBI)	1319.02	0.732913	0.321445	2.28006	0.0226042	0.0554638	101.493	FALSE
BW25113_0484	copA	copper transporter (NCBI)	2323.28	0.729829	0.237491	3.07308	0.00211865	0.00706954	9.51275	FALSE
BW25113_1530	marR	multiple antibiotic resistance protein; repressor of mar operon (VIMSS)	799.45	0.729597	0.12012	6.07392	1.24827e-09	1.29693e-08	5.60475e-06	FALSE
BW25113_0957	ompA	outer membrane protein A (3a;II*;G;d) (NCBI)	649986	0.727031	0.0797152	9.12036	7.48785e-20	1.53108e-18	3.36205e-16	FALSE
BW25113_1846	yebE	hypothetical protein (NCBI)	778.772	0.723349	0.149813	4.82834	1.37674e-06	9.41226e-06	0.00618155	FALSE
BW25113_2750	cysC	adenylylsulfate kinase (NCBI)	5.28364	0.721107	0.661814	1.08959	0.275893	0.420901	1238.76	FALSE
BW25113_0400	phoR	sensory histidine kinase in two-component regulatory system with PhoB (NCBI)	828.99	0.7202	0.10114	7.12079	1.07308e-12	1.4877e-11	4.81813e-09	FALSE
BW25113_2131	osmF	predicted transporter subunit: periplasmic-binding component of ABC superfamily (NCBI)	378.724	0.718272	0.159397	4.50618	6.60063e-06	4.08254e-05	0.0296368	FALSE
BW25113_2670	alaE	predicted inner membrane protein (NCBI)	714.503	0.717628	0.169907	4.22364	2.40385e-05	0.000131756	0.107933	FALSE
BW25113_2397	alaW		83.5916	0.71464	0.445796	1.60307	0.10892	0.203906	489.051	FALSE
BW25113_3020	ygiS	predicted transporter subunit: periplasmic-binding component of ABC superfamily (NCBI)	2892.18	0.713198	0.211791	3.36745	0.000758654	0.00287659	3.40636	FALSE
BW25113_3662	nepI	predicted transporter (RefSeq)	563.697	0.712377	0.156838	4.54212	5.56926e-06	3.49288e-05	0.025006	FALSE
BW25113_0630	lipB		3063.96	0.711068	0.108546	6.55085	5.72122e-11	6.90556e-10	2.56883e-07	FALSE
BW25113_2665	ygaU	hypothetical protein (NCBI)	1126.93	0.707789	0.131097	5.39895	6.70303e-08	5.57921e-07	0.000300966	FALSE
BW25113_1304	pspA	regulatory protein for phage-shock-protein operon (NCBI)	2562.68	0.707129	0.0828586	8.53416	1.41173e-17	2.61229e-16	6.33869e-14	FALSE
BW25113_2129	yehX	predicted transporter subunit: ATP-binding component of ABC superfamily (NCBI)	164.575	0.707066	0.172144	4.10741	4.00118e-05	0.00020907	0.179653	FALSE
BW25113_1197	treA	periplasmic trehalase (NCBI)	663.462	0.70447	0.171993	4.09593	4.20473e-05	0.000218939	0.188793	FALSE
BW25113_2075	mdtB	multidrug efflux system, subunit B (NCBI)	1464.97	0.703618	0.10979	6.40874	1.4673e-10	1.68476e-09	6.58818e-07	FALSE
BW25113_0637	rsfS		4676	0.702501	0.157814	4.45145	8.52906e-06	5.13348e-05	0.0382955	FALSE
BW25113_1023	pgaB	predicted enzyme associated with biofilm formation (NCBI)	222.958	0.701077	0.129428	5.41673	6.07004e-08	5.09019e-07	0.000272545	FALSE
BW25113_0216	aspV	tRNA-Asp (NCBI)	85.7767	0.697174	0.361573	1.92817	0.053834	0.115014	241.714	FALSE
BW25113_1009	rutD	predicted hydrolase (NCBI)	22.5073	0.696935	0.367081	1.89859	0.0576186	0.121419	258.707	FALSE
BW25113_3860	dsbA	periplasmic protein disulfide isomerase I (NCBI)	10140.6	0.69596	0.0737112	9.44172	3.66698e-21	7.97123e-20	1.64647e-17	FALSE
BW25113_0830	gsiB	predicted peptide transporter subunit: periplasmic-binding component of ABC superfamily (NCBI)	1443.85	0.694774	0.0904333	7.68272	1.55749e-14	2.43861e-13	6.99311e-11	FALSE
BW25113_1623	add	adenosine deaminase (NCBI)	6103.68	0.693884	0.186528	3.72	0.00019922	0.000875475	0.8945	FALSE
BW25113_1786	yeaJ	orf, hypothetical protein (VIMSS)	1257.5	0.692435	0.144025	4.80774	1.52646e-06	1.031e-05	0.00685382	FALSE
BW25113_2562	yfhL	predicted 4Fe-4S cluster-containing protein (NCBI)	448.329	0.691686	0.273399	2.52995	0.0114079	0.0304982	51.2214	FALSE
BW25113_0807	rlmF	orf, hypothetical protein (VIMSS)	2051.04	0.69068	0.208432	3.31369	0.000920721	0.00342726	4.13404	FALSE
BW25113_2701	mltB	membrane-bound lytic murein transglycosylase B (NCBI)	1480.92	0.689204	0.117785	5.85137	4.87527e-09	4.69494e-08	2.189e-05	FALSE
BW25113_3257	yhdT	conserved inner membrane protein (NCBI)	385.979	0.688239	0.203033	3.38979	0.000699455	0.00267477	3.14055	FALSE
BW25113_1694	ydiF	fused predicted acetyl-CoA:acetoacetyl-CoA transferase: alpha subunit/beta subunit (NCBI)	125.403	0.688046	0.30626	2.24661	0.0246649	0.0597023	110.745	FALSE
BW25113_4122	fumB	anaerobic class I fumarate hydratase (fumarase B) (NCBI)	1042.87	0.686254	0.135818	5.05274	4.35518e-07	3.20764e-06	0.00195547	FALSE
BW25113_2662	gabT	4-aminobutyrate aminotransferase (NCBI)	743.337	0.682195	0.207127	3.29361	0.000989107	0.00362797	4.44109	FALSE
BW25113_0143	pcnB	poly(A) polymerase I (VIMSS)	15063.1	0.681109	0.179254	3.79968	0.000144885	0.000656675	0.650533	FALSE
BW25113_0576	pheP	phenylalanine transporter (NCBI)	5635.13	0.680864	0.16949	4.01713	5.89105e-05	0.000294421	0.264508	FALSE
BW25113_3096	mzrA	hypothetical protein (NCBI)	1474.41	0.675375	0.0893504	7.55873	4.07024e-14	6.22067e-13	1.82754e-10	FALSE
BW25113_1835	rsmF	putative nucleolar proteins (VIMSS)	2229.11	0.674276	0.195978	3.44056	0.000580506	0.00226438	2.60647	FALSE
BW25113_3821	pldA	outer membrane phospholipase A (NCBI)	3847.65	0.672887	0.1297	5.18803	2.12535e-07	1.63809e-06	0.000954283	FALSE
BW25113_1554	rrrQ		26.7943	0.672244	0.671944	1.00045	0.317095	0.467089	1423.75	FALSE
BW25113_0860	artJ	arginine transporter subunit (NCBI)	703.215	0.671827	0.12548	5.35407	8.59984e-08	7.06607e-07	0.000386133	FALSE
BW25113_2456	eutN	predicted carboxysome structural protein, ethanolamine utilization protein (NCBI)	19.5283	0.668492	0.571082	1.17057	0.241771	0.379213	1085.55	FALSE
BW25113_0455	ffs		47.9911	0.665696	0.403415	1.65015	0.0989118	0.18872	444.114	FALSE
BW25113_0854	potF	putrescine transporter subunit: periplasmic-binding component of ABC superfamily (NCBI)	302.297	0.665386	0.298448	2.22949	0.0257812	0.0620023	115.758	FALSE
BW25113_0144	gluQ	glutamyl-Q tRNA(Asp) synthetase (RefSeq)	1701.56	0.663614	0.282365	2.3502	0.0187635	0.0471774	84.2481	FALSE
BW25113_3396	mrcA	peptidoglycan synthetase; penicillin-binding protein 1A (VIMSS)	6038.24	0.662652	0.118632	5.58577	2.32673e-08	2.07966e-07	0.00010447	FALSE
BW25113_3563	yiaB	orf, hypothetical protein (VIMSS)	41.3844	0.661489	0.351081	1.88415	0.0595445	0.124832	267.355	FALSE
BW25113_0831	gsiC	predicted peptide transporter subunit: membrane component of ABC superfamily (NCBI)	522.786	0.659989	0.13011	5.07256	3.92507e-07	2.91484e-06	0.00176236	FALSE
BW25113_1704	aroH	3-deoxy-D-arabino-heptulosonate-7-phosphate synthase, tryptophan repressible (NCBI)	2739.22	0.659846	0.146607	4.50079	6.77029e-06	4.1702e-05	0.0303986	FALSE
BW25113_3035	tolC	outer membrane channel; specific tolerance to colicin E1; segregation of daughter chromosomes (VIMSS)	35837.5	0.659131	0.0718449	9.17435	4.54302e-20	9.37495e-19	2.03982e-16	FALSE
BW25113_0832	gsiD	predicted peptide transporter subunit: membrane component of ABC superfamily (NCBI)	308.636	0.657888	0.154015	4.27157	1.941e-05	0.000108512	0.0871509	FALSE
BW25113_2019	hisG	ATP phosphoribosyltransferase (NCBI)	5849.35	0.656321	0.10676	6.14763	7.86503e-10	8.32615e-09	3.5314e-06	FALSE
BW25113_1050	yceK		402.353	0.655604	0.155271	4.22233	2.41786e-05	0.0001322	0.108562	FALSE
BW25113_0861	artM	arginine transporter subunit (NCBI)	1245.3	0.655024	1.09511	0.598137	0.549749	0.686496	2468.37	FALSE
BW25113_2026	hisI	bifunctional phosphoribosyl-AMP cyclohydrolase/phosphoribosyl-ATP pyrophosphatase protein (NCBI)	3289.59	0.653712	0.0848622	7.70322	1.32683e-14	2.09209e-13	5.95745e-11	FALSE
BW25113_1312	ycjP	predicted sugar transporter subunit: membrane component of ABC superfamily (NCBI)	171.42	0.653091	0.292977	2.22915	0.0258037	0.062023	115.859	FALSE
BW25113_3380	yhfW	predicted mutase (NCBI)	111.288	0.652713	0.921616	0.708226	0.478805	0.62437	2149.83	FALSE
BW25113_0966	hspQ	DNA-binding protein, hemimethylated (RefSeq)	4574.44	0.652317	0.0984015	6.62914	3.37658e-11	4.16538e-10	1.51608e-07	FALSE
BW25113_2023	hisH	imidazole glycerol phosphate synthase subunit HisH (NCBI)	1345.76	0.652309	0.128566	5.07371	3.90133e-07	2.90685e-06	0.0017517	FALSE
BW25113_2661	gabD	succinate-semialdehyde dehydrogenase I, NADP-dependent (NCBI)	707.452	0.652121	0.177857	3.66655	0.000245844	0.00105855	1.10384	FALSE
BW25113_3098	yqjD	hypothetical protein (NCBI)	3737.98	0.651097	0.0807901	8.05913	7.68413e-16	1.27443e-14	3.45017e-12	FALSE
BW25113_1626	ydgK	orf, hypothetical protein (VIMSS)	1062.85	0.650205	0.184156	3.53073	0.000414422	0.00167489	1.86075	FALSE
BW25113_1472	yddL		4.41796	0.64938	0.901974	0.719954	0.471553	0.618517	2117.27	FALSE
BW25113_0857	potI	putrescine transporter subunit: membrane component of ABC superfamily (NCBI)	133.838	0.649271	0.200795	3.2335	0.00122282	0.00436317	5.49045	FALSE
BW25113_3729	glmS		47150.2	0.648861	0.0682637	9.50521	1.99637e-21	4.42561e-20	8.9637e-18	FALSE
BW25113_0704	ybfC		29.4452	0.645599	0.444525	1.45233	0.146409	0.256301	657.376	FALSE
BW25113_1048	opgG	glucan biosynthesis protein, periplasmic (NCBI)	19514.5	0.645448	0.0716669	9.00623	2.13262e-19	4.3212e-18	9.57545e-16	FALSE
BW25113_1702	ppsA	phosphoenolpyruvate synthase (NCBI)	31354.2	0.644785	0.287385	2.24363	0.0248563	0.0600682	111.605	FALSE
BW25113_3359	argD	bifunctional acetylornithine aminotransferase/ succinyldiaminopimelate aminotransferase (NCBI)	1468.63	0.644289	0.0682282	9.44315	3.61747e-21	7.90197e-20	1.62424e-17	FALSE
BW25113_0864	artP	arginine transporter subunit (NCBI)	2596.36	0.643097	0.0717003	8.96924	2.98558e-19	6.02227e-18	1.34053e-15	FALSE
BW25113_2214	apbE	predicted thiamine biosynthesis lipoprotein (NCBI)	1571.74	0.641144	0.165226	3.88041	0.00010428	0.000488458	0.468217	FALSE
BW25113_0405	queA	S-adenosylmethionine:tRNA ribosyltransferase-isomerase (NCBI)	5365.43	0.639572	0.188607	3.39103	0.000696317	0.00266505	3.12646	FALSE
BW25113_2705	srlD	3-ketoacyl-(acyl-carrier-protein) reductase (NCBI)	9112.62	0.639284	0.237372	2.69318	0.00707746	0.0200842	31.7778	FALSE
BW25113_0862	artQ	arginine transporter subunit (NCBI)	1576.29	0.638156	0.0779922	8.1823	2.78468e-16	4.77769e-15	1.25032e-12	FALSE
BW25113_1245	oppC	oligopeptide transporter subunit (NCBI)	17784.8	0.637729	0.0762789	8.3605	6.24553e-17	1.10108e-15	2.80424e-13	FALSE
BW25113_1340	smrA		560.385	0.636826	0.126027	5.05308	4.34746e-07	3.20724e-06	0.00195201	FALSE
BW25113_2886	ygfS	putative oxidoreductase, Fe-S subunit (VIMSS)	7.20164	0.636399	0.6788	0.937536	0.348483	0.500162	1564.69	FALSE
BW25113_0364	yaiS	orf, hypothetical protein (VIMSS)	19.3668	0.63376	0.626904	1.01094	0.312047	0.461933	1401.09	FALSE
BW25113_4174	hflK	modulator for HflB protease specific for phage lambda cII repressor (NCBI)	38229.8	0.631961	0.0779448	8.1078	5.15448e-16	8.67735e-15	2.31436e-12	FALSE
BW25113_3031	yqiA	predicted esterase (NCBI)	11.6733	0.631608	0.719044	0.8784	0.379727	0.532378	1704.97	FALSE
BW25113_3658	selC	tRNA-Sec (NCBI)	36.017	0.630545	0.517496	1.21845	0.223052	0.358477	1001.5	FALSE
BW25113_2814	metZ	tRNA-Met (NCBI)	2109.44	0.629863	0.359102	1.75399	0.0794315	0.156901	356.647	FALSE
BW25113_4077	gltP	glutamate/aspartate:proton symporter (NCBI)	6938.01	0.62981	0.123499	5.09972	3.40159e-07	2.54296e-06	0.00152731	FALSE
BW25113_3066	dnaG		18447.6	0.629785	0.182328	3.45413	0.000552068	0.00216666	2.47878	FALSE
BW25113_3097	yqjC	orf, hypothetical protein (VIMSS)	4427.98	0.629493	0.0720541	8.7364	2.40667e-18	4.62536e-17	1.0806e-14	FALSE
BW25113_2017	yefM	orf, hypothetical protein (VIMSS)	1418.47	0.628827	0.0917749	6.85184	7.29067e-12	9.49059e-11	3.27351e-08	FALSE
BW25113_0793	ybhS	predicted transporter subunit: membrane component of ABC superfamily (NCBI)	405.308	0.628323	0.153697	4.08807	4.34976e-05	0.000225965	0.195304	FALSE
BW25113_0685	ybfE	orf, hypothetical protein (VIMSS)	1091.26	0.624289	0.270193	2.31053	0.0208586	0.0516906	93.6553	FALSE
BW25113_1483	ddpF	D-ala-D-ala transporter subunit (NCBI)	175.337	0.621731	0.217835	2.85413	0.00431545	0.0130837	19.3764	FALSE
BW25113_2965	speC	ornithine decarboxylase isozyme (VIMSS)	2194.51	0.619614	0.0803638	7.71011	1.25705e-14	1.98907e-13	5.64417e-11	FALSE
BW25113_3862	yihG	predicted endonuclease (NCBI)	725.401	0.619125	0.235808	2.62554	0.00865108	0.0240618	38.8434	FALSE
BW25113_0638	cobC	predicted alpha-ribazole-5'-P phosphatase (NCBI)	986.743	0.618449	0.146937	4.20895	2.56555e-05	0.000139593	0.115193	FALSE
BW25113_0438	clpX	ATP-dependent protease ATP-binding subunit (NCBI)	54040	0.618399	0.0759534	8.14183	3.8934e-16	6.57912e-15	1.74814e-12	FALSE
BW25113_0545	ybcL	DLP12 prophage; predicted kinase inhibitor (NCBI)	71.6757	0.618086	0.230448	2.68211	0.0073159	0.0206561	32.8484	FALSE
BW25113_2567	rnc		6993	0.615862	0.171219	3.59693	0.000321994	0.00133138	1.44575	FALSE
BW25113_2413	cysZ	putative sulfate transport protein CysZ (NCBI)	1625.46	0.615727	0.102022	6.03525	1.58713e-09	1.63383e-08	7.12619e-06	FALSE
BW25113_0961	yccF	conserved inner membrane protein (NCBI)	1244.75	0.614409	0.0913659	6.72471	1.75939e-11	2.23189e-10	7.89967e-08	FALSE
BW25113_0113	pdhR	transcriptional regulator of pyruvate dehydrogenase complex (NCBI)	14636.6	0.613467	0.332675	1.84404	0.0651767	0.134327	292.644	FALSE
BW25113_2808	gcvA	DNA-binding transcriptional dual regulator (NCBI)	1802.41	0.611483	0.142287	4.29754	1.72708e-05	9.78967e-05	0.0775457	FALSE
BW25113_1807	tsaB		4641.11	0.611211	0.153709	3.97642	6.99617e-05	0.000342766	0.314128	FALSE
BW25113_1435	ydcP	putative collagenase (VIMSS)	5100.91	0.610094	0.126848	4.80966	1.51187e-06	1.02436e-05	0.0067883	FALSE
BW25113_1097	yceG	predicted aminodeoxychorismate lyase (NCBI)	1883.05	0.609677	0.102739	5.93426	2.95182e-09	2.93739e-08	1.32537e-05	FALSE
BW25113_1282	yciH	orf, hypothetical protein (VIMSS)	1448.18	0.607662	0.166283	3.65438	0.000257804	0.00110685	1.15754	FALSE
BW25113_1126	potA	putrescine/spermidine ABC transporter ATPase protein (NCBI)	11229.3	0.605779	0.166974	3.62799	0.000285637	0.00120896	1.28251	FALSE
BW25113_3822	recQ	ATP-dependent DNA helicase (NCBI)	4428.81	0.605493	0.13699	4.41997	9.87131e-06	5.86257e-05	0.0443222	FALSE
BW25113_4678	yoeI		813.575	0.6048	0.270832	2.23312	0.025541	0.0614957	114.679	FALSE
BW25113_2196	ccmF	heme lyase, CcmF subunit (NCBI)	716.648	0.60367	0.122299	4.936	7.97397e-07	5.64991e-06	0.00358031	FALSE
BW25113_2832	ygdQ	predicted inner membrane protein (NCBI)	1559.75	0.603192	0.170751	3.53258	0.000411518	0.00166466	1.84772	FALSE
BW25113_4270	leuX		92.4506	0.602577	0.412237	1.46172	0.143817	0.252752	645.738	FALSE
BW25113_0856	potH	putrescine transporter subunit: membrane component of ABC superfamily (NCBI)	121.596	0.601444	0.224088	2.68396	0.00727557	0.0205682	32.6673	FALSE
BW25113_2325	yfcL	hypothetical protein (NCBI)	2581.41	0.601014	0.0847573	7.091	1.33142e-12	1.84016e-11	5.97808e-09	FALSE
BW25113_3021	mqsA	predicted DNA-binding transcriptional regulator (NCBI)	1472.29	0.600692	0.0955473	6.28686	3.23958e-10	3.59971e-09	1.45457e-06	FALSE
BW25113_4384	deoD	purine nucleoside phosphorylase (NCBI)	35656.2	0.600418	0.101732	5.90195	3.59225e-09	3.5046e-08	1.61292e-05	FALSE
BW25113_1441	ydcT	predicted spermidine/putrescine transporter subunit (NCBI)	186.583	0.600086	0.216103	2.77685	0.00548882	0.0160542	24.6448	FALSE
BW25113_4050	pspG	orf, hypothetical protein (VIMSS)	123.033	0.600031	0.190522	3.14941	0.00163598	0.00563533	7.34556	FALSE
BW25113_4539	yoeB		1116.23	0.600029	0.129918	4.61852	3.8648e-06	2.46182e-05	0.017353	FALSE
BW25113_0549	ybcO	DLP12 prophage; predicted protein (NCBI)	8.44752	0.60002	0.892945	0.671956	0.501611	0.646207	2252.24	FALSE
BW25113_2024	hisA	N-(5'-phospho-L-ribosyl-formimino)-5-amino-1-(5'- phosphoribosyl)-4-imidazolecarboxamide isomerase (VIMSS)	3299.82	0.599755	0.109018	5.50143	3.76732e-08	3.23181e-07	0.000169152	FALSE
BW25113_3099	yqjE	conserved inner membrane protein (NCBI)	3523.11	0.599436	0.0815806	7.34778	2.01523e-13	2.95875e-12	9.04837e-10	FALSE
BW25113_3458	livK	leucine transporter subunit (NCBI)	440.989	0.596844	0.234162	2.54885	0.0108078	0.0290849	48.5269	FALSE
BW25113_1666	valW		168.473	0.594879	0.342221	1.73829	0.0821599	0.161153	368.898	FALSE
BW25113_3292	zntR	zinc-responsive transcriptional regulator (NCBI)	858.41	0.594846	0.131296	4.53058	5.88226e-06	3.67375e-05	0.0264114	FALSE
BW25113_0183	rnhB	ribonuclease HII (NCBI)	3554.14	0.594519	0.160962	3.69355	0.000221147	0.000960518	0.992948	FALSE
BW25113_0582	insL1		6548.65	0.593983	0.100542	5.9078	3.46714e-09	3.39109e-08	1.55675e-05	FALSE
BW25113_2519	pbpC	fused transglycosylase/transpeptidase (NCBI)	1094.96	0.593145	0.0985953	6.01596	1.78823e-09	1.82824e-08	8.02917e-06	FALSE
BW25113_2014	plaP	putative amino acid/amine transport protein (VIMSS)	28093	0.593009	0.242594	2.44445	0.0145075	0.0376169	65.1385	FALSE
BW25113_3114	tdcE	pyruvate formate-lyase 4/2-ketobutyrate formate-lyase (NCBI)	673.173	0.592998	0.226329	2.62007	0.00879112	0.0243907	39.4721	FALSE
BW25113_3643	rph	ribonuclease PH (NCBI)	4756.96	0.592914	0.18098	3.27613	0.00105238	0.00383137	4.72521	FALSE
BW25113_4713	agrB		17.0506	0.592429	0.469182	1.26269	0.206702	0.336831	928.093	FALSE
BW25113_2499	purM	phosphoribosylaminoimidazole synthetase (NCBI)	586.975	0.591497	0.555217	1.06534	0.28672	0.433176	1287.37	FALSE
BW25113_1828	yebQ	putative transport protein (VIMSS)	531.661	0.589262	0.158965	3.70686	0.000209843	0.000917655	0.942196	FALSE
BW25113_2326	epmC	hypothetical protein (NCBI)	3218.73	0.589144	0.0794795	7.41252	1.23921e-13	1.84972e-12	5.56404e-10	FALSE
BW25113_3726	pstA	phosphate transporter subunit (NCBI)	1230.59	0.587637	0.151279	3.88445	0.00010256	0.000481062	0.460493	FALSE
BW25113_0084	ftsI		7672.73	0.587307	0.0805345	7.29261	3.04e-13	4.37721e-12	1.36496e-09	FALSE
BW25113_1133	mnmA		11163.7	0.586526	0.161492	3.63192	0.000281323	0.00119427	1.26314	FALSE
BW25113_0402	proY	predicted cryptic proline transporter (NCBI)	4648.81	0.585915	0.162114	3.61422	0.000301259	0.00125961	1.35265	FALSE
BW25113_2815	metW		4610.17	0.585028	0.320092	1.82769	0.0675966	0.137778	303.509	FALSE
BW25113_4712	agrA		75.7462	0.584107	0.278734	2.09557	0.0361205	0.0824401	162.181	FALSE
BW25113_2572	rseA	anti-sigma factor (NCBI)	15093.9	0.582443	0.207175	2.81136	0.00493321	0.0146297	22.1501	FALSE
BW25113_3816	corA	magnesium/nickel/cobalt transporter (NCBI)	9420.19	0.581706	0.170094	3.4199	0.000626444	0.00243124	2.81274	FALSE
BW25113_2317	dedA	conserved inner membrane protein (NCBI)	3165.64	0.58095	0.0920629	6.31036	2.78393e-10	3.11662e-09	1.24999e-06	FALSE
BW25113_4155	epmA		2093.88	0.580364	0.212673	2.7289	0.00635459	0.0182409	28.5321	FALSE
BW25113_2022	hisB	imidazoleglycerolphosphate dehydratase and histidinol-phosphate phosphatase (VIMSS)	6834.34	0.580341	0.10676	5.43594	5.45075e-08	4.58806e-07	0.000244739	FALSE
BW25113_4358	yjjN	predicted oxidoreductase, Zn-dependent and NAD(P)-binding (RefSeq)	99.2181	0.578605	0.249139	2.32242	0.0202104	0.0503094	90.7448	FALSE
BW25113_2328	mepA	penicillin-insensitive murein endopeptidase (NCBI)	2718.93	0.578137	0.08811	6.56153	5.32573e-11	6.44557e-10	2.39125e-07	FALSE
BW25113_0123	cueO	multicopper oxidase (laccase) (NCBI)	1680.49	0.576379	0.146674	3.92966	8.5067e-05	0.000407848	0.381951	FALSE
BW25113_2266	elaB	hypothetical protein (NCBI)	1761.75	0.574201	0.141666	4.0532	5.05212e-05	0.000257167	0.22684	FALSE
BW25113_2066	udk	uridine/cytidine kinase (VIMSS)	3310.26	0.573553	0.17523	3.27315	0.00106355	0.00386574	4.77535	FALSE
BW25113_0367	tauC	taurine transporter subunit (NCBI)	41.5688	0.573132	0.280301	2.0447	0.0408844	0.0912663	183.571	FALSE
BW25113_3022	mqsR	predicted cyanide hydratase (NCBI)	1285.66	0.57195	0.106094	5.39099	7.00718e-08	5.82155e-07	0.000314622	FALSE
BW25113_1439	ydcR	fused predicted DNA-binding transcriptional regulator/predicted amino transferase (NCBI)	1482.3	0.57152	0.231507	2.46869	0.0135607	0.0354702	60.8877	FALSE
BW25113_3756	rrsC		27463.2	0.570964	0.512814	1.11339	0.265539	0.408059	1192.27	FALSE
BW25113_1049	opgH	glucosyltransferase MdoH (NCBI)	23720.2	0.570459	0.0726666	7.85036	4.14829e-15	6.77958e-14	1.86258e-11	FALSE
BW25113_1165	ymgA		63.0334	0.569589	0.474366	1.20074	0.229853	0.365252	1032.04	FALSE
BW25113_3263	yhdU	predicted membrane protein (NCBI)	69.2991	0.569399	0.382907	1.48704	0.137004	0.243454	615.147	FALSE
BW25113_1920	fliY	cystine transporter subunit (NCBI)	3262.94	0.569152	0.108894	5.22666	1.72596e-07	1.34649e-06	0.000774958	FALSE
BW25113_1280	yciM		3909.77	0.568429	0.0999972	5.68445	1.31236e-08	1.20921e-07	5.89249e-05	FALSE
BW25113_0010	satP	conserved inner membrane protein associated with acetate transport (NCBI)	1119.03	0.567291	0.166542	3.40629	0.000658524	0.00254213	2.95677	FALSE
BW25113_3471	yhhQ	conserved inner membrane protein (NCBI)	590.273	0.567232	0.214106	2.6493	0.00806576	0.0226165	36.2153	FALSE
BW25113_1436	yncJ		112.667	0.566981	0.196057	2.89192	0.00382891	0.0118084	17.1918	FALSE
BW25113_1236	galU	glucose-1-phosphate uridylyltransferase (NCBI)	23688.3	0.566649	0.068765	8.24038	1.71668e-16	2.95665e-15	7.7079e-13	FALSE
BW25113_2027	wzzB	regulator of length of O-antigen component of lipopolysaccharide chains (VIMSS)	27688.5	0.566239	0.102385	5.53051	3.19305e-08	2.78723e-07	0.000143368	FALSE
BW25113_0756	galM	galactose-1-epimerase (mutarotase) (NCBI)	17847.8	0.565886	0.156543	3.6149	0.000300463	0.00125952	1.34908	FALSE
BW25113_0073	leuB	3-isopropylmalate dehydrogenase (VIMSS)	57.7629	0.564411	1.27975	0.441033				FALSE
BW25113_1783	yeaG	conserved protein with nucleoside triphosphate hydrolase domain (NCBI)	1540.85	0.564391	0.135521	4.16459	3.11917e-05	0.000166878	0.140051	FALSE
BW25113_1281	pyrF	orotidine 5'-phosphate decarboxylase (NCBI)	3418.68	0.563851	0.168588	3.34455	0.000824163	0.00310395	3.70049	FALSE
BW25113_0606	ahpF	alkyl hydroperoxide reductase, F52a subunit; detoxification of hydroperoxides (VIMSS)	15231.1	0.563579	0.0902493	6.24469	4.24644e-10	4.61543e-09	1.90665e-06	FALSE
BW25113_2308	hisQ	histidine/lysine/arginine/ornithine transporter subunit (NCBI)	746.05	0.563077	0.189101	2.97765	0.0029047	0.0093242	13.0421	FALSE
BW25113_0433	ampG	muropeptide transporter (NCBI)	5172.64	0.562382	0.161934	3.47291	0.000514841	0.00202945	2.31164	FALSE
BW25113_3965	trmA	tRNA (uracil-5-)-methyltransferase (NCBI)	6718.62	0.562157	0.16545	3.39774	0.000679441	0.00260938	3.05069	FALSE
BW25113_2347	yfdC	predicted inner membrane protein (NCBI)	229.758	0.560363	0.158995	3.52441	0.000424424	0.00170608	1.90566	FALSE
BW25113_2573	rpoE		12939.8	0.559714	0.192194	2.91224	0.00358845	0.0111591	16.1121	FALSE
BW25113_2576	srmB	ATP-dependent RNA helicase (NCBI)	9020.67	0.559049	0.165134	3.38543	0.000710671	0.00270841	3.19091	FALSE
BW25113_3056	cca		4950.64	0.558588	0.111285	5.01943	5.18244e-07	3.76126e-06	0.00232692	FALSE
BW25113_1795	yeaQ	conserved inner membrane protein (NCBI)	931.595	0.556607	0.169249	3.28869	0.00100655	0.00368247	4.51942	FALSE
BW25113_4069	acs	acetyl-coenzyme A synthetase (NCBI)	1626.15	0.555293	0.600258	0.925091	0.354919	0.505993	1593.58	FALSE
BW25113_2309	hisJ	histidine/lysine/arginine/ornithine transporter subunit (NCBI)	2368.96	0.553371	0.187659	2.94881	0.00318998	0.0100739	14.323	FALSE
BW25113_0700	rhsC	rhsC element core protein RshC (NCBI)	763.269	0.552355	0.109292	5.05393	4.32821e-07	3.20155e-06	0.00194337	FALSE
BW25113_0417	thiL		3565.46	0.551957	0.162616	3.39423	0.000688217	0.00263856	3.09009	FALSE
BW25113_4433	sdsR		52.2889	0.551311	0.676401	0.815065	0.415035	0.56697	1863.51	FALSE
BW25113_2316	accD		31026.8	0.550527	0.100077	5.50105	3.77547e-08	3.23261e-07	0.000169518	FALSE
BW25113_1744	astE	succinylglutamate desuccinylase (NCBI)	572.142	0.550251	0.301013	1.828	0.0675502	0.137778	303.3	FALSE
BW25113_2582	trxC	thioredoxin 2 (NCBI)	1429.33	0.549428	0.176122	3.11959	0.00181101	0.00616239	8.13144	FALSE
BW25113_0821	ybiU	hypothetical protein (NCBI)	1796.77	0.548307	0.124297	4.41128	1.02763e-05	6.07087e-05	0.0461405	FALSE
BW25113_3669	uhpA	DNA-binding response regulator in two-component regulatory system wtih UhpB (NCBI)	1783.58	0.54825	0.15624	3.50903	0.00044975	0.00179659	2.01938	FALSE
BW25113_1629	rsxC	electron transport complex protein RnfC (NCBI)	6183.35	0.547961	0.167408	3.27322	0.00106331	0.00386574	4.77428	FALSE
BW25113_3633	waaA		3873.87	0.547753	0.143717	3.81132	0.000138227	0.000628406	0.620639	FALSE
BW25113_4218	ytfL	predicted inner membrane protein (NCBI)	2045.23	0.546761	0.186312	2.93466	0.00333912	0.0104857	14.9927	FALSE
BW25113_1313	ycjQ	predicted oxidoreductase, Zn-dependent and NAD(P)-binding (NCBI)	305.05	0.545814	0.187701	2.90789	0.00363878	0.0112764	16.3381	FALSE
BW25113_3702	dnaA		11802.7	0.54326	0.169821	3.19901	0.00137899	0.00484323	6.19167	FALSE
BW25113_1842	holE	DNA polymerase III, theta subunit (NCBI)	843.556	0.542026	0.151933	3.56753	0.000360362	0.001467	1.61803	FALSE
BW25113_0511	ybbW	putative transport protein (VIMSS)	37.4424	0.541669	0.402201	1.34676	0.178057	0.299414	799.477	FALSE
BW25113_4029	yjbH	predicted porin (NCBI)	452.793	0.541419	0.141314	3.83132	0.000127459	0.0005842	0.572293	FALSE
BW25113_4548	ypjJ	hypothetical protein (NCBI)	13.7911	0.540963	0.470748	1.14916	0.250491	0.390564	1124.71	FALSE
BW25113_1345	intR	Rac prophage; integrase (NCBI)	923.148	0.540945	0.174145	3.1063	0.00189446	0.0064074	8.50613	FALSE
BW25113_1775	ydjK	predicted transporter (NCBI)	215.066	0.540396	0.339464	1.59191	0.111405	0.207172	500.207	FALSE
BW25113_1211	prfA		6015.14	0.540061	0.129099	4.18333	2.87274e-05	0.000154617	0.128986	FALSE
BW25113_1870	cmoA		2679.64	0.539501	0.141472	3.81347	0.000137029	0.000624865	0.615262	FALSE
BW25113_1968	yedV	predicted sensory kinase in two-component regulatory system with YedW (NCBI)	311.507	0.539205	1.51683	0.355481	0.722229	0.818978	3242.81	FALSE
BW25113_2127	mlrA	DNA-binding transcriptional regulator (NCBI)	247.464	0.538517	0.144389	3.72964	0.000191756	0.000845159	0.860983	FALSE
BW25113_0910	cmk		22035.7	0.537108	0.0895238	5.99961	1.97788e-09	1.99988e-08	8.8807e-06	FALSE
BW25113_0416	nusB		14245	0.536586	0.118948	4.51109	6.44939e-06	3.99452e-05	0.0289578	FALSE
BW25113_1665	valV		167.111	0.535135	0.382748	1.39814	0.162071	0.277854	727.698	FALSE
BW25113_0654	gltJ	glutamate and aspartate transporter subunit (NCBI)	836.111	0.534342	0.219626	2.43297	0.0149757	0.0387188	67.2407	FALSE
BW25113_3741	mnmG	glucose-inhibited division protein A (NCBI)	13981.5	0.532398	0.194462	2.7378	0.00618522	0.0178119	27.7717	FALSE
BW25113_1051	msyB		692.929	0.531278	0.114547	4.6381	3.51632e-06	2.24944e-05	0.0157883	FALSE
BW25113_3178	ftsH		93959.3	0.530897	0.0634783	8.36344	6.09168e-17	1.0782e-15	2.73516e-13	FALSE
BW25113_0884	infA		14584.6	0.53011	0.166021	3.19303	0.00140786	0.00493303	6.32131	FALSE
BW25113_4032	malG	maltose transporter subunit (NCBI)	3042.24	0.529894	0.281949	1.8794	0.0601901	0.126008	270.253	FALSE
BW25113_2198	ccmD	cytochrome c biogenesis protein (NCBI)	97.9205	0.529616	0.2211	2.39537	0.0166037	0.0426081	74.5505	FALSE
BW25113_4641	yoeH		116.49	0.529492	0.243523	2.1743	0.0296827	0.0695547	133.275	FALSE
BW25113_1501	ydeP	putative oxidoreductase, major subunit, acid resistance protein (Katherine Huang)	237.814	0.527937	0.162257	3.25371	0.00113909	0.00409708	5.11453	FALSE
BW25113_3360	pabA	para-aminobenzoate synthase component II (NCBI)	386.711	0.527369	0.149765	3.5213	0.000429435	0.00172467	1.92816	FALSE
BW25113_1517	lsrF	hypothetical protein (NCBI)	109.432	0.526512	0.255981	2.05683	0.0397021	0.0890713	178.263	FALSE
BW25113_1204	pth		2992.91	0.525013	0.136512	3.84591	0.000120104	0.000552181	0.539265	FALSE
BW25113_1314	ycjR	putative transient receptor potential locus (VIMSS)	235.444	0.524828	0.154454	3.39796	0.00067891	0.00260938	3.04831	FALSE
BW25113_4141	yjeH	predicted transporter (NCBI)	623.651	0.523124	0.123397	4.23936	2.2416e-05	0.000123467	0.100648	FALSE
BW25113_3829	metE	5-methyltetrahydropteroyltriglutamate-- homocysteine methyltransferase (NCBI)	1544.29	0.523104	0.0970887	5.3879	7.12868e-08	5.91153e-07	0.000320078	FALSE
BW25113_1909	leuZ		4572.11	0.522933	0.26158	1.99914	0.0455937	0.0999845	204.716	FALSE
BW25113_1558	cspF	Qin prophage; cold shock protein (NCBI)	316.941	0.522831	0.36843	1.41908	0.155877	0.268882	699.888	FALSE
BW25113_0570	cusS	sensory histidine kinase in two-component regulatory system with CusR, senses copper ions (NCBI)	869.49	0.52247	0.16047	3.25587	0.00113045	0.0040758	5.07572	FALSE
BW25113_0569	nfrB	bacteriophage N4 receptor, inner membrane subunit (NCBI)	742.617	0.522092	0.103701	5.03461	4.78824e-07	3.49192e-06	0.00214992	FALSE
BW25113_2097	fbaB	orf, hypothetical protein (VIMSS)	1805.72	0.520425	0.159023	3.27263	0.00106551	0.0038697	4.78412	FALSE
BW25113_1440	ydcS	predicted spermidine/putrescine transporter subunit (NCBI)	384.952	0.520239	0.238884	2.17778	0.0294221	0.0690526	132.105	FALSE
BW25113_0612	citT	citrate:succinate antiporter (NCBI)	146.959	0.51998	0.229494	2.26577	0.0234655	0.0572324	105.36	FALSE
BW25113_0083	ftsL		3290.3	0.519858	0.0879295	5.91221	3.37539e-09	3.32198e-08	1.51555e-05	FALSE
BW25113_0534	sfmF	predicted fimbrial-like adhesin protein (NCBI)	21.4229	0.519838	0.607001	0.856403	0.391775	0.544834	1759.07	FALSE
BW25113_4615	yibV		13.9854	0.519105	0.737295	0.704067	0.481391	0.626102	2161.45	FALSE
BW25113_3653	gltS	glutamate transporter (NCBI)	1865.68	0.519026	0.0925554	5.60774	2.04989e-08	1.84696e-07	9.20398e-05	FALSE
BW25113_4585	chiX	Novel sRNA, function unknown (RefSeq)	32.9681	0.518418	0.325595	1.59222	0.111336	0.207131	499.9	FALSE
BW25113_4655	ythA	expressed protein (RefSeq)	15.2699	0.518017	0.568904	0.910553	0.362531	0.514064	1627.76	FALSE
BW25113_0423	thiI	thiamine biosynthesis protein ThiI (NCBI)	11830.4	0.517808	0.143216	3.61557	0.000299683	0.00125772	1.34558	FALSE
BW25113_3239	yhcO	predicted barnase inhibitor (NCBI)	119.658	0.517694	0.319412	1.62077	0.105066	0.198183	471.747	FALSE
BW25113_4011	yjaA	hypothetical protein (NCBI)	89.6528	0.517485	0.315064	1.64248	0.100491	0.190678	451.205	FALSE
BW25113_2357	yfdN	CPS-53 (KpLE1) prophage; predicted protein (NCBI)	4.84314	0.51735	1.21682	0.425167	0.670715	0.779512	3011.51	FALSE
BW25113_2432	yfeY	hypothetical protein (NCBI)	2567.52	0.517013	0.160216	3.22698	0.00125103	0.00444614	5.61715	FALSE
BW25113_2704	srlB	glucitol/sorbitol-specific enzyme IIA component of PTS (NCBI)	2900.69	0.516875	0.247752	2.08626	0.0369546	0.0837746	165.926	FALSE
BW25113_0068	thiB	thiamin transporter subunit (NCBI)	1503.08	0.516771	0.175209	2.94945	0.00318339	0.0100662	14.2934	FALSE
BW25113_4371	rsmC	16S ribosomal RNA m2G1207 methyltransferase (NCBI)	5261.42	0.515356	0.163451	3.15297	0.00161618	0.00557141	7.25665	FALSE
BW25113_0085	murE		12631.6	0.514749	0.0707264	7.27803	3.38725e-13	4.86158e-12	1.52088e-09	FALSE
BW25113_3642	pyrE	orotate phosphoribosyltransferase (NCBI)	383.428	0.51313	0.160615	3.19478	0.00139937	0.00490713	6.28319	FALSE
BW25113_4175	hflC	modulator for HflB protease specific for phage lambda cII repressor (NCBI)	30139.7	0.51278	0.0854695	5.99957	1.97845e-09	1.99988e-08	8.88322e-06	FALSE
BW25113_1488	ddpX	D-ala-D-ala dipeptidase, Zn-dependent (NCBI)	82.7035	0.510878	0.352979	1.44733	0.147804	0.258339	663.639	FALSE
BW25113_3470	tusA		728.093	0.510026	0.173517	2.93935	0.003289	0.0103573	14.7676	FALSE
BW25113_2669	stpA	DNA binding protein, nucleoid-associated (NCBI)	650.258	0.509977	0.227184	2.24477	0.0247828	0.0599229	111.275	FALSE
BW25113_0415	ribE		12152.1	0.509572	0.122633	4.15526	3.24914e-05	0.000173416	0.145886	FALSE
BW25113_1320	ycjW	predicted DNA-binding transcriptional regulator (NCBI)	715.107	0.508732	0.108252	4.69952	2.60771e-06	1.71221e-05	0.0117086	FALSE
BW25113_1286	rnb	exoribonuclease II (NCBI)	25582.6	0.507135	0.140977	3.5973	0.00032154	0.00133073	1.44371	FALSE
BW25113_0699	ybfA		507.19	0.506427	0.283268	1.78781	0.0738073	0.147747	331.395	FALSE
BW25113_3978	glyT		9658	0.505563	0.0906097	5.57957	2.41115e-08	2.14228e-07	0.00010826	FALSE
BW25113_3671	ilvB	acetolactate synthase large subunit (NCBI)	13441.2	0.505084	0.220803	2.28749	0.0221675	0.0545399	99.5322	FALSE
BW25113_4452	gadY	unknown RNA (NCBI)	43.8607	0.504649	0.383081	1.31734	0.187724	0.313083	842.881	FALSE
BW25113_2569	lepA	GTP-binding protein LepA (NCBI)	34777.2	0.504641	0.14527	3.47381	0.000513131	0.00202628	2.30396	FALSE
BW25113_3278	rrsD		37455.4	0.504113	0.483917	1.04174	0.297534	0.444712	1335.93	FALSE
BW25113_0661	miaB	isopentenyl-adenosine A37 tRNA methylthiolase (NCBI)	14229.6	0.50335	0.132467	3.79982	0.000144799	0.000656675	0.650145	FALSE
BW25113_2315	folC		7153.39	0.502435	0.0997949	5.03468	4.78654e-07	3.49192e-06	0.00214916	FALSE
BW25113_0464	acrR	DNA-binding transcriptional repressor (NCBI)	2209.11	0.501637	0.116389	4.30999	1.6326e-05	9.322e-05	0.0733037	FALSE
BW25113_1203	ychF		20863.6	0.501398	0.144161	3.47805	0.000505077	0.001998	2.26779	FALSE
BW25113_1453	ansP	L-asparagine permease (VIMSS)	1616.02	0.500545	0.164418	3.04434	0.00233195	0.0076896	10.4705	FALSE
BW25113_3065	rpsU		61709.6	0.500189	0.157356	3.17871	0.00147933	0.0051512	6.64219	FALSE
BW25113_2472	dapE		8564.91	0.500072	0.0709606	7.04717	1.8259e-12	2.4928e-11	8.19831e-09	FALSE
BW25113_1714	pheS		44524.7	0.499518	0.084973	5.87855	4.1388e-09	4.01159e-08	1.85832e-05	FALSE
BW25113_0945	pyrD	dihydroorotate dehydrogenase (NCBI)	2208.38	0.498611	0.147589	3.37838	0.000729154	0.00277649	3.2739	FALSE
BW25113_4704	arrS		4.69401	0.497865	0.889845	0.559496	0.575823	0.706836	2585.45	FALSE
BW25113_2945	endA	DNA-specific endonuclease I (NCBI)	373.71	0.497664	0.19891	2.50196	0.0123508	0.0326681	55.4552	FALSE
BW25113_4471	tdcG	L-serine dehydratase 3 (NCBI)	266.096	0.497179	0.192786	2.57891	0.00991122	0.0270625	44.5014	FALSE
BW25113_3964	yijD	conserved inner membrane protein (NCBI)	5028.35	0.496853	0.0974893	5.09649	3.46013e-07	2.58241e-06	0.0015536	FALSE
BW25113_2771	ygcS	putative transport protein (VIMSS)	57.2956	0.495709	0.310419	1.5969	0.110288	0.205864	495.191	FALSE
BW25113_2025	hisF	imidazole glycerol phosphate synthase subunit HisF (NCBI)	4404.44	0.495486	0.12658	3.9144	9.06293e-05	0.000432663	0.406925	FALSE
BW25113_0772	ybhC	predicted pectinesterase (NCBI)	10642.1	0.494293	0.120964	4.08626	4.38379e-05	0.00022747	0.196832	FALSE
BW25113_1301	puuB	gamma-Glu-putrescine oxidase, FAD/NAD(P)-binding (NCBI)	189.037	0.491723	0.264121	1.86174	0.0626404	0.130225	281.256	FALSE
BW25113_1606	folM	short chain dehydrogenase (NCBI)	1180.67	0.491477	0.133	3.69532	0.000219611	0.000955704	0.986055	FALSE
BW25113_2318	truA	tRNA pseudouridine synthase A (NCBI)	15.7746	0.491199	0.409594	1.19923	0.230437	0.365825	1034.66	FALSE
BW25113_1695	ydiO	putative oxidoreductase (VIMSS)	117.581	0.491138	0.217596	2.25711	0.0240014	0.058178	107.766	FALSE
BW25113_0885	aat	leucyl/phenylalanyl-tRNA--protein transferase (NCBI)	1270.15	0.490185	0.116036	4.22444	2.39533e-05	0.00013145	0.10755	FALSE
BW25113_1212	prmC		2384.11	0.490128	0.131286	3.73327	0.000189009	0.000834697	0.84865	FALSE
BW25113_2044	wcaL	predicted glycosyl transferase (NCBI)	435.927	0.48958	0.130562	3.74978	0.000176986	0.000791753	0.794669	FALSE
BW25113_2069	yegD	putative heat shock protein (VIMSS)	1406.11	0.489335	0.223459	2.18982	0.0285376	0.0674005	128.134	FALSE
BW25113_0571	cusR	DNA-binding response regulator in two-component regulatory system with CusS (NCBI)	833.3	0.487679	0.11753	4.14941	3.33329e-05	0.000177274	0.149665	FALSE
BW25113_2660	lhgO	orf, hypothetical protein (VIMSS)	274.421	0.487541	0.298676	1.63234	0.102608	0.194365	460.71	FALSE
BW25113_3614	yibQ	orf, hypothetical protein (VIMSS)	2320.45	0.487539	0.108024	4.51327	6.38365e-06	3.95928e-05	0.0286626	FALSE
BW25113_3250	mreC	cell wall structural complex MreBCD transmembrane component MreC (NCBI)	11324	0.486837	0.0815355	5.97086	2.36009e-09	2.37494e-08	1.05968e-05	FALSE
BW25113_4372	holD		1434.74	0.486824	0.153483	3.17184	0.00151478	0.00526643	6.80134	FALSE
BW25113_3812	yigB	predicted hydrolase (NCBI)	2010.68	0.486527	0.130899	3.7168	0.000201761	0.000884902	0.905906	FALSE
BW25113_2807	ygdD	conserved inner membrane protein (NCBI)	1197.08	0.48647	0.130884	3.71681	0.000201758	0.000884902	0.905893	FALSE
BW25113_0689	ybfP	hypothetical protein (NCBI)	264.044	0.485357	0.204234	2.37648	0.0174788	0.0445223	78.4799	FALSE
BW25113_3447	ggt	gamma-glutamyltranspeptidase periplasmic precursor (NCBI)	731.93	0.484596	0.122993	3.94003	8.14711e-05	0.000393557	0.365805	FALSE
BW25113_4007	rrsE		28737.6	0.483328	0.498624	0.969323	0.332384	0.483095	1492.4	FALSE
BW25113_3979	thrT		7962.89	0.482895	0.0829817	5.81929	5.90978e-09	5.6547e-08	2.65349e-05	FALSE
BW25113_2076	mdtC	multidrug efflux system, subunit C (NCBI)	1016.03	0.482448	0.0755527	6.38558	1.7075e-10	1.95056e-09	7.66669e-07	FALSE
BW25113_1820	yobD	hypothetical protein (NCBI)	786.32	0.481935	0.183417	2.62753	0.00860066	0.0239513	38.6169	FALSE
BW25113_1306	pspC	DNA-binding transcriptional activator (NCBI)	524.737	0.481858	0.106972	4.50453	6.65212e-06	4.10872e-05	0.029868	FALSE
BW25113_1310	ycjN	predicted sugar transporter subunit: periplasmic-binding component of ABC superfamily (NCBI)	392.561	0.481809	0.323363	1.49	0.136225	0.242166	611.65	FALSE
BW25113_1227	narI	nitrate reductase 1, gamma (cytochrome b(NR)) subunit (NCBI)	96.6229	0.48145	0.352417	1.36614	0.171896	0.290802	771.815	FALSE
BW25113_2042	wcaN	predicted subunit with GalU (NCBI)	17577.7	0.479894	0.112182	4.27782	1.88737e-05	0.00010631	0.0847427	FALSE
BW25113_3153	yhbO	orf, hypothetical protein (VIMSS)	191.616	0.479478	0.192578	2.48978	0.0127822	0.0337292	57.3919	FALSE
BW25113_1346	ydaQ	orf, hypothetical protein (VIMSS)	10.7294	0.478201	0.502661	0.951339	0.341432	0.493363	1533.03	FALSE
BW25113_1161	ycgX		108.92	0.477638	0.315234	1.51518	0.129726	0.232893	582.471	FALSE
BW25113_3390	aroK	shikimate kinase I (NCBI)	17679.3	0.47606	0.141732	3.35888	0.000782593	0.00295984	3.51384	FALSE
BW25113_0195	tsaA	hypothetical protein (NCBI)	2316.22	0.476027	0.143143	3.32552	0.000882524	0.00329878	3.96253	FALSE
BW25113_0969	tusE		1622.49	0.474904	0.107483	4.41843	9.9422e-06	5.89684e-05	0.0446405	FALSE
BW25113_2018	hisL		42.9329	0.474569	0.366995	1.29312	0.19597	0.323737	879.905	FALSE
BW25113_0833	yliE	conserved inner membrane protein (NCBI)	284.827	0.47449	0.247973	1.91347	0.0556877	0.118017	250.038	FALSE
BW25113_3182	dacB	D-alanyl-D-alanine carboxypeptidase (NCBI)	2477.14	0.474205	0.118226	4.01099	6.04638e-05	0.000301176	0.271482	FALSE
BW25113_4557	yidD	hypothetical protein (NCBI)	9057.83	0.473797	0.181849	2.60544	0.00917551	0.0252849	41.198	FALSE
BW25113_2514	hisS		24119.7	0.472816	0.100117	4.72264	2.32806e-06	1.53989e-05	0.010453	FALSE
BW25113_1194	ycgR	protein involved in flagellar function (NCBI)	198.584	0.472607	0.257821	1.83308	0.0667908	0.136848	299.891	FALSE
BW25113_2765	queD	6-pyruvoyl tetrahydrobiopterin synthase (PTPS) (NCBI)	1822.34	0.470956	0.185224	2.54262	0.0110023	0.0294844	49.4005	FALSE
BW25113_4037	malM	maltose regulon periplasmic protein (NCBI)	11672.1	0.470848	0.264341	1.78121	0.0748778	0.149355	336.201	FALSE
BW25113_3751	rbsB	D-ribose transporter subunit (NCBI)	20040.7	0.470493	0.236695	1.98776	0.0468387	0.102083	210.306	FALSE
BW25113_2186	yejK	nucleoid-associated protein NdpA (NCBI)	7648.97	0.469944	0.101863	4.61351	3.95919e-06	2.51479e-05	0.0177768	FALSE
BW25113_0149	mrcB	penicillin-binding protein 1b (NCBI)	9343.19	0.469896	0.073545	6.38923	1.66724e-10	1.90944e-09	7.48591e-07	FALSE
BW25113_3416	malQ	4-alpha-glucanotransferase (amylomaltase) (NCBI)	9355.96	0.468678	0.232333	2.01727	0.0436676	0.0966124	196.068	FALSE
BW25113_3100	yqjK	hypothetical protein (NCBI)	1730.53	0.468343	0.0813195	5.75929	8.44682e-09	7.9464e-08	3.79262e-05	FALSE
BW25113_2359	yfdP	CPS-53 (KpLE1) prophage; predicted protein (RefSeq)	41.0179	0.466175	0.758853	0.614316	0.539007	0.678296	2420.14	FALSE
BW25113_2346	mlaA	predicted lipoprotein (NCBI)	8345.01	0.465942	0.0719419	6.47664	9.37874e-11	1.10231e-09	4.21105e-07	FALSE
BW25113_0577	ybdG	predicted mechanosensitive channel (NCBI)	3673.72	0.465155	0.0785477	5.92194	3.18169e-09	3.14027e-08	1.42858e-05	FALSE
BW25113_0156	erpA		5319.62	0.465026	0.0846201	5.49546	3.89686e-08	3.33018e-07	0.000174969	FALSE
BW25113_4241	treR	trehalose repressor (NCBI)	894.32	0.462485	0.125045	3.69855	0.000216837	0.000945468	0.973598	FALSE
BW25113_0005	yaaX	hypothetical protein (NCBI)	491.322	0.462449	0.101536	4.55453	5.25022e-06	3.31133e-05	0.0235735	FALSE
BW25113_0461	tomB	hypothetical protein (NCBI)	1786.3	0.462217	0.123097	3.75489	0.000173416	0.000778892	0.778637	FALSE
BW25113_3795	yifK	predicted transporter (NCBI)	4835.46	0.4612	0.114688	4.02135	5.78652e-05	0.000289844	0.259815	FALSE
BW25113_2265	menF	isochorismate hydroxymutase 2, menaquinone biosynthesis (VIMSS)	2961.43	0.461193	0.0835671	5.51883	3.4127e-08	2.96739e-07	0.00015323	FALSE
BW25113_1649	nemR		522.922	0.461047	0.152258	3.02807	0.00246123	0.00807858	11.0509	FALSE
BW25113_2963	mltC	membrane-bound lytic murein transglycosylase C (VIMSS)	2661.39	0.46095	0.10169	4.53287	5.81865e-06	3.63909e-05	0.0261257	FALSE
BW25113_1812	pabB	para-aminobenzoate synthase component I (NCBI)	1610.3	0.460946	0.187572	2.45744	0.0139932	0.0364736	62.8296	FALSE
BW25113_0801	ybiC	predicted dehydrogenase (NCBI)	1308.88	0.460796	0.118036	3.90387	9.46659e-05	0.000449061	0.42505	FALSE
BW25113_2585	pssA		12124.9	0.459876	0.159841	2.87707	0.00401381	0.0122772	18.022	FALSE
BW25113_2517	rlmN	predicted enzyme (NCBI)	15260.8	0.459711	0.191473	2.40092	0.0163538	0.0420633	73.4284	FALSE
BW25113_0098	secA		39729	0.458178	0.0841935	5.44196	5.26972e-08	4.44403e-07	0.00023661	FALSE
BW25113_1910	cysT		4104.58	0.458115	0.248017	1.84711	0.0647313	0.133641	290.644	FALSE
BW25113_0829	gsiA	fused predicted peptide transport subunits of ABC superfamily: ATP-binding components (RefSeq)	2132.56	0.45757	0.147536	3.10141	0.00192601	0.00650426	8.64777	FALSE
BW25113_1196	ycgY	hypothetical protein (NCBI)	32.5787	0.456939	0.348719	1.31033	0.190083	0.315607	853.473	FALSE
BW25113_1307	pspD	peripheral inner membrane phage-shock protein (NCBI)	251.943	0.456399	0.163723	2.78763	0.00530948	0.015601	23.8396	FALSE
BW25113_0739	tolA	cell envelope integrity inner membrane protein TolA (NCBI)	8618.82	0.455809	0.103752	4.39325	1.11668e-05	6.57094e-05	0.0501388	FALSE
BW25113_2078	baeS	sensory histidine kinase in two-component regulatory system with BaeR (NCBI)	366.804	0.455729	0.126852	3.5926	0.000327392	0.00134997	1.46999	FALSE
BW25113_1836	yebV	orf, hypothetical protein (VIMSS)	286.879	0.454657	0.15334	2.96502	0.00302661	0.00968776	13.5895	FALSE
BW25113_0568	nfrA	bacteriophage N4 receptor, outer membrane subunit (NCBI)	1530.27	0.454646	0.0983582	4.62235	3.79424e-06	2.42031e-05	0.0170361	FALSE
BW25113_2058	wcaB	predicted acyl transferase (NCBI)	115.453	0.454308	0.243048	1.86921	0.0615932	0.128405	276.553	FALSE
BW25113_0794	ybhF	putative ATP-binding component of a transport system (VIMSS)	1620.29	0.453994	0.164274	2.76363	0.00571616	0.0166539	25.6656	FALSE
BW25113_2536	hcaT	predicted 3-phenylpropionic transporter (NCBI)	1087.56	0.453852	0.153142	2.9636	0.00304064	0.00971875	13.6525	FALSE
BW25113_2306	hisP	histidine/lysine/arginine/ornithine transporter subunit (NCBI)	675.459	0.452397	0.278582	1.62393	0.104391	0.197159	468.717	FALSE
BW25113_1491	yddW	predicted liprotein (NCBI)	1323.98	0.451919	0.118061	3.82784	0.000129273	0.000591908	0.580437	FALSE
BW25113_2128	yehW	predicted transporter subunit: membrane component of ABC superfamily (NCBI)	295.55	0.450328	0.129002	3.49085	0.000481488	0.00190975	2.16188	FALSE
BW25113_3251	mreB		28736.2	0.450295	0.0887702	5.07259	3.92435e-07	2.91484e-06	0.00176203	FALSE
BW25113_3527	yhjJ	predicted zinc-dependent peptidase (NCBI)	5742.25	0.450221	0.175563	2.56445	0.010334	0.0280118	46.3995	FALSE
BW25113_4183	yjfK	hypothetical protein (NCBI)	61.7333	0.45003	0.293505	1.53329	0.125203	0.226896	562.164	FALSE
BW25113_1644	ydhJ	putative membrane protein (VIMSS)	10.3889	0.448701	0.495502	0.905548	0.365175	0.517132	1639.64	FALSE
BW25113_1296	puuP	putative amino acid/amine transport protein (VIMSS)	340.977	0.447974	0.158757	2.82176	0.00477611	0.0142393	21.4447	FALSE
BW25113_2394	insL1		8800.86	0.44767	0.115198	3.88609	0.000101871	0.000478674	0.457399	FALSE
BW25113_4130	dtpC	predicted transporter (NCBI)	296.502	0.447326	0.162696	2.74947	0.00596918	0.0172898	26.8016	FALSE
BW25113_1911	glyW		5150.27	0.447129	0.232764	1.92096	0.0547372	0.116609	245.77	FALSE
BW25113_0082	rsmH	S-adenosyl-methyltransferase (NCBI)	9631.01	0.446381	0.0709806	6.28878	3.19978e-10	3.56433e-09	1.4367e-06	FALSE
BW25113_1100	ycfH	predicted metallodependent hydrolase (NCBI)	3874.58	0.445281	0.139089	3.20142	0.00136753	0.0048143	6.1402	FALSE
BW25113_0108	ppdD	predicted major pilin subunit (NCBI)	35.5944	0.444783	0.331552	1.34152	0.179752	0.301245	807.084	FALSE
BW25113_4392	slt	soluble lytic murein transglycosylase (VIMSS)	2569.4	0.444417	0.0950944	4.67343	2.96216e-06	1.92799e-05	0.0133001	FALSE
BW25113_0581	ybdK	gamma-glutamyl:cysteine ligase (NCBI)	368.034	0.443636	0.208954	2.12313	0.0337432	0.0776076	151.507	FALSE
BW25113_3937	yiiX	predicted peptidoglycan peptidase (NCBI)	883.85	0.443368	0.180888	2.45107	0.0142433	0.0370824	63.9526	FALSE
BW25113_0572	cusC	copper/silver efflux system, outer membrane component (NCBI)	57.8783	0.44306	0.346702	1.27793	0.201275	0.330392	903.725	FALSE
BW25113_0722	sdhD	succinate dehydrogenase cytochrome b556 small membrane subunit (NCBI)	388.128	0.441827	0.406368	1.08726	0.276923	0.421647	1243.39	FALSE
BW25113_0437	clpP	ATP-dependent Clp protease proteolytic subunit (NCBI)	23026.6	0.441266	0.0834286	5.28915	1.22887e-07	9.80903e-07	0.000551761	FALSE
BW25113_1806	yeaY	predicted lipoprotein (NCBI)	4162.37	0.441006	0.1318	3.34602	0.000819814	0.00309278	3.68096	FALSE
BW25113_0102	zapD	hypothetical protein (NCBI)	2318.67	0.440821	0.110397	3.99304	6.52322e-05	0.000322152	0.292893	FALSE
BW25113_3786	wecB	UDP-N-acetyl glucosamine-2-epimerase (NCBI)	7237.36	0.440504	0.108682	4.05313	5.05375e-05	0.000257167	0.226914	FALSE
BW25113_1255	yciC	hypothetical protein (NCBI)	3200.79	0.43981	0.111762	3.93524	8.31146e-05	0.000400632	0.373185	FALSE
BW25113_3672	ivbL	ilvB operon leader peptide (NCBI)	1496.39	0.43975	0.190698	2.306	0.0211108	0.0522577	94.7876	FALSE
BW25113_4092	phnP	carbon-phosphorus lyase complex accessory protein (NCBI)	344.707	0.438851	0.160992	2.72591	0.0064124	0.0183951	28.7917	FALSE
BW25113_1990	ldtA	conserved protein with NAD(P)-binding Rossmann-fold domain (NCBI)	1021.12	0.43783	0.134101	3.26493	0.00109493	0.00396049	4.91623	FALSE
BW25113_0049	apaH	diadenosinetetraphosphatase (NCBI)	3375.38	0.437783	0.101082	4.33096	1.48461e-05	8.54512e-05	0.0666592	FALSE
BW25113_1780	yeaD	orf, hypothetical protein (VIMSS)	5143.29	0.437344	0.121602	3.59653	0.000322487	0.00133219	1.44797	FALSE
BW25113_1652	rnt		2032.99	0.436913	0.134545	3.24733	0.00116493	0.0041766	5.23056	FALSE
BW25113_3457	livH	leucine/isoleucine/valine transporter subunit (NCBI)	250.382	0.436829	0.241311	1.81023	0.0702601	0.142235	315.468	FALSE
BW25113_0174	ispU		13121.5	0.43652	0.139141	3.13725	0.00170542	0.00585649	7.65733	FALSE
BW25113_3933	ftsN	essential cell division protein (NCBI)	7171.02	0.435905	0.1506	2.89446	0.00379817	0.0117298	17.0538	FALSE
BW25113_2470	acrD	aminoglycoside/multidrug efflux system (NCBI)	1259.74	0.435446	0.0619056	7.03404	2.00641e-12	2.71441e-11	9.00877e-09	FALSE
BW25113_0847	ybjL	hypothetical protein (NCBI)	1812.73	0.435186	0.113451	3.83591	0.000125101	0.000573976	0.561702	FALSE
BW25113_0065	yabI	conserved inner membrane protein (NCBI)	1439.96	0.434684	0.172541	2.51931	0.0117584	0.031323	52.7951	FALSE
BW25113_1344	ttcA	predicted C32 tRNA thiolase (NCBI)	7367.59	0.433339	0.120299	3.60219	0.000315543	0.00131076	1.41679	FALSE
BW25113_2311	ubiX		779.928	0.432701	0.211199	2.04878	0.0404838	0.0904171	181.772	FALSE
BW25113_3704	rnpA		23171.7	0.432219	0.174758	2.47324	0.0133894	0.035104	60.1183	FALSE
BW25113_3424	glpG	predicted intramembrane serine protease (NCBI)	4122.27	0.432055	0.132068	3.27146	0.00106994	0.00388267	4.80405	FALSE
BW25113_2416	ptsI		95417.6	0.429869	0.116995	3.67426	0.000238544	0.00103308	1.07106	FALSE
BW25113_0776	bioF	8-amino-7-oxononanoate synthase (NCBI)	160.125	0.427953	0.216056	1.98075	0.0476196	0.103465	213.812	FALSE
BW25113_2212	alkB	oxidative demethylase of N1-methyladenine or N3-methylcytosine DNA lesions (NCBI)	5.00327	0.42704	0.695293	0.614186	0.539092	0.678296	2420.52	FALSE
BW25113_2175	mepS	predicted peptidase, outer membrane lipoprotein (NCBI)	22648.8	0.426707	0.188902	2.25889	0.0238903	0.0581103	107.268	FALSE
BW25113_4469	ygiQ	hypothetical protein (NCBI)	9272.85	0.426544	0.179362	2.37811	0.0174015	0.0443759	78.1329	FALSE
BW25113_1927	amyA	cytoplasmic alpha-amylase (NCBI)	1332.48	0.426387	0.0953	4.47415	7.67155e-06	4.64861e-05	0.0344453	FALSE
BW25113_0101	yacG	zinc-binding protein (NCBI)	1003.46	0.425909	0.110267	3.86252	0.000112225	0.000520769	0.503889	FALSE
BW25113_4547	ypfN	hypothetical protein (NCBI)	1533.21	0.42531	0.0868499	4.89708	9.72735e-07	6.79549e-06	0.00436758	FALSE
BW25113_0863	artI	arginine transporter subunit (NCBI)	4016.98	0.424906	0.0840777	5.05373	4.3326e-07	3.20155e-06	0.00194534	FALSE
BW25113_3101	yqjF	orf, hypothetical protein (VIMSS)	109.327	0.424455	0.23749	1.78726	0.073896	0.147858	331.793	FALSE
BW25113_2077	mdtD	multidrug efflux system protein (NCBI)	290.684	0.424068	0.129699	3.26962	0.00107691	0.0039048	4.83535	FALSE
BW25113_0090	murG		7298.25	0.424001	0.0725558	5.8438	5.10242e-09	4.90314e-08	2.29099e-05	FALSE
BW25113_3236	mdh	malate dehydrogenase (NCBI)	34125.4	0.42365	0.192756	2.19786	0.0279593	0.0661394	125.537	FALSE
BW25113_4424	rdlC		65.1346	0.422844	0.26662	1.58594	0.112752	0.209157	506.259	FALSE
BW25113_4208	cycA	D-alanine/D-serine/glycine transporter (NCBI)	5556.99	0.422687	0.33291	1.26968	0.2042	0.33397	916.86	FALSE
BW25113_0089	ftsW		7871.65	0.422405	0.0703693	6.00269	1.94081e-09	1.97073e-08	8.71422e-06	FALSE
BW25113_4597	rydC		176.631	0.422382	0.131838	3.20379	0.00135632	0.00478991	6.08988	FALSE
BW25113_2199	ccmC	heme exporter subunit (NCBI)	317.107	0.421633	0.13035	3.23463	0.00121799	0.00434942	5.46879	FALSE
BW25113_2961	mutY	adenine DNA glycosylase (NCBI)	5885.56	0.421607	0.130179	3.23867	0.00120088	0.00429517	5.39196	FALSE
BW25113_3252	csrD	conserved inner membrane protein (NCBI)	3252.06	0.419627	0.0918344	4.56939	4.89155e-06	3.09383e-05	0.021963	FALSE
BW25113_0477	gsk	inosine/guanosine kinase (NCBI)	5058.83	0.41907	0.160255	2.61502	0.00892211	0.0246777	40.0603	FALSE
BW25113_3086	ygjQ	predicted thioredoxin-like (NCBI)	96.477	0.418649	0.230331	1.8176	0.0691254	0.140638	310.373	FALSE
BW25113_0099	mutT	nucleoside triphosphate pyrophosphohydrolase, marked preference for dGTP (NCBI)	1097.65	0.417637	0.101056	4.13271	3.58504e-05	0.000189091	0.160968	FALSE
BW25113_0173	dxr		4791.27	0.416214	0.0918154	4.53316	5.81076e-06	3.63909e-05	0.0260903	FALSE
BW25113_0976	hyaE	protein involved in processing of HyaA and HyaB proteins (NCBI)	30.8745	0.414262	0.349631	1.18486	0.236075	0.372102	1059.98	FALSE
BW25113_2497	uraA	uracil transporter (NCBI)	3482.99	0.413801	0.187324	2.20901	0.0271738	0.0646568	122.01	FALSE
BW25113_1381	ydbH	hypothetical protein (NCBI)	2715.93	0.413362	0.0745906	5.54175	2.99465e-08	2.63459e-07	0.00013446	FALSE
BW25113_3935	priA	primosome assembly protein PriA (NCBI)	2460.83	0.413277	0.106546	3.87886	0.000104949	0.000491077	0.47122	FALSE
BW25113_3347	fkpA	FKBP-type peptidyl-prolyl cis-trans isomerase (rotamase) (NCBI)	53611.1	0.412927	0.0785915	5.25409	1.48755e-07	1.17069e-06	0.00066791	FALSE
BW25113_4102	phnF	predicted DNA-binding transcriptional regulator of phosphonate uptake and biodegradation (NCBI)	28.6029	0.412888	0.424157	0.973431	0.330339	0.48106	1483.22	FALSE
BW25113_1008	rutE	hypothetical protein (NCBI)	28.0297	0.411081	0.443398	0.927115	0.353867	0.505264	1588.86	FALSE
BW25113_2498	upp	uracil phosphoribosyltransferase (VIMSS)	11854.8	0.410365	0.144643	2.83709	0.00455273	0.0136826	20.4418	FALSE
BW25113_3613	envC	putative membrane protein (VIMSS)	6226.88	0.409899	0.0949034	4.31911	1.56657e-05	8.98221e-05	0.070339	FALSE
BW25113_1632	rsxE	NADH-ubiquinone oxidoreductase (NCBI)	10.4929	0.40987	0.675558	0.606713	0.544042	0.68146	2442.75	FALSE
BW25113_0192	nlpE	lipoprotein involved with copper homeostasis and adhesion (NCBI)	2162.58	0.409496	0.0837316	4.89058	1.00538e-06	6.99081e-06	0.00451414	FALSE
BW25113_1984	asnW	tRNA-Asn (NCBI)	24.2218	0.409346	0.565393	0.724003	0.469064	0.61572	2106.1	FALSE
BW25113_2508	guaB		14608.5	0.409319	0.199649	2.0502	0.0403453	0.090288	181.15	FALSE
BW25113_0186	ldcC	lysine decarboxylase 2, constitutive (NCBI)	1850.41	0.408564	0.10575	3.8635	0.000111772	0.000519206	0.501856	FALSE
BW25113_0245	ykfI	CP4-6 prophage; toxin of the YkfI-YafW toxin-antitoxin system (NCBI)	340.389	0.406989	0.196957	2.06639	0.0387921	0.0872482	174.177	FALSE
BW25113_4361	dnaC		1230.05	0.406674	0.135434	3.00276	0.00267547	0.00868801	12.0129	FALSE
BW25113_3095	yqjA	conserved inner membrane protein (NCBI)	2711.83	0.40583	0.076265	5.32132	1.03019e-07	8.35727e-07	0.000462557	FALSE
BW25113_1931	yedK	hypothetical protein (NCBI)	134.835	0.405719	0.28181	1.43969	0.149954	0.260775	673.295	FALSE
BW25113_0808	ybiO	putative transport protein (VIMSS)	372.35	0.405174	0.131866	3.07263	0.00212185	0.00707492	9.52709	FALSE
BW25113_1442	ydcU	predicted spermidine/putrescine transporter subunit (NCBI)	140.918	0.40512	0.224682	1.80308	0.0713756	0.144024	320.476	FALSE
BW25113_3190	ibaG	orf, hypothetical protein (VIMSS)	4473.21	0.405073	0.0917493	4.415	1.01009e-05	5.98304e-05	0.045353	FALSE
BW25113_3752	rbsK	ribokinase (NCBI)	8022.65	0.404973	0.202756	1.99734	0.0457883	0.100166	205.589	FALSE
BW25113_4672	ymiB		20.2939	0.404669	0.572167	0.707256	0.479407	0.624974	2152.54	FALSE
BW25113_4360	yjjA	putative glycoprotein/receptor (VIMSS)	1801.63	0.404308	0.138988	2.90894	0.00362662	0.0112465	16.2835	FALSE
BW25113_1305	pspB	phage shock protein B (NCBI)	2.95794	0.404286	0.900139	0.449137	0.653333	0.766272	2933.46	FALSE
BW25113_3425	glpE	thiosulfate sulfurtransferase (NCBI)	1700.56	0.404212	0.115011	3.51454	0.000440509	0.00176125	1.97789	FALSE
BW25113_4318	fimF	minor component of type 1 fimbriae (NCBI)	149.159	0.404184	0.188962	2.13897	0.0324377	0.0749902	145.645	FALSE
BW25113_3064	tsaD		4296.72	0.40352	0.137416	2.93649	0.00331954	0.0104315	14.9047	FALSE
BW25113_0818	ybiR	predicted transporter (NCBI)	1924.78	0.402329	0.112315	3.58215	0.000340779	0.00140001	1.5301	FALSE
BW25113_0188	tilS		2376.08	0.401925	0.119677	3.35841	0.000783927	0.00296238	3.51983	FALSE
BW25113_0812	dps	DNA protection during starvation conditions (NCBI)	5285.77	0.400822	0.117748	3.40408	0.000663878	0.00255619	2.98081	FALSE
BW25113_3364	tsgA	hypothetical protein (NCBI)	2414.54	0.40078	0.246224	1.62771	0.103587	0.195971	465.105	FALSE
BW25113_3717	cbrC	hypothetical protein (NCBI)	423.062	0.400563	0.132633	3.02008	0.00252705	0.00824789	11.3464	FALSE
BW25113_1761	gdhA	glutamate dehydrogenase (NCBI)	5890.19	0.400145	0.126264	3.16913	0.00152899	0.00530348	6.86514	FALSE
BW25113_1373	tfaR		60.4625	0.39993	0.246994	1.61919	0.105407	0.198658	473.276	FALSE
BW25113_2464	talA	transaldolase A (NCBI)	1238.79	0.399515	0.188169	2.12317	0.0337397	0.0776076	151.491	FALSE
BW25113_2197	ccmE	periplasmic heme chaperone (NCBI)	241.394	0.399094	0.152029	2.62513	0.00866171	0.0240764	38.8911	FALSE
BW25113_0826	moeB	molybdopterin biosynthesis protein MoeB (NCBI)	7.43704	0.398957	0.623849	0.639509	0.522492	0.66526	2345.99	FALSE
BW25113_2074	mdtA	putative membrane protein (VIMSS)	11.0083	0.398865	0.486986	0.819048	0.412759	0.564864	1853.29	FALSE
BW25113_0513	ybbY	putative transport (VIMSS)	101.125	0.39836	0.227873	1.74817	0.0804345	0.158463	361.151	FALSE
BW25113_3667	uhpC	regulator of uhpT (VIMSS)	674.101	0.398112	0.203512	1.95621	0.0504405	0.108749	226.478	FALSE
BW25113_4374	yjjG	nucleotidase (NCBI)	2482.5	0.398022	0.129714	3.06847	0.00215161	0.00716351	9.66074	FALSE
BW25113_2307	hisM	histidine/lysine/arginine/ornithine transporter subunit (NCBI)	448.312	0.397925	0.166358	2.39198	0.0167576	0.0429786	75.2417	FALSE
BW25113_0955	ycbZ	predicted peptidase (NCBI)	17994.3	0.396413	0.0883261	4.48806	7.18744e-06	4.39091e-05	0.0322716	FALSE
BW25113_0201	rrsH		35093.3	0.395034	0.378479	1.04374	0.296605	0.444159	1331.76	FALSE
BW25113_4481	wecF	4-alpha-L-fucosyltransferase (NCBI)	2957.51	0.394989	0.0688404	5.73775	9.59431e-09	8.98814e-08	4.30784e-05	FALSE
BW25113_2321	flk	predicted flagella assembly protein (NCBI)	2577.02	0.394915	0.139908	2.82268	0.00476236	0.0142172	21.383	FALSE
BW25113_0632	dacA	D-alanyl-D-alanine carboxypeptidase (penicillin-binding protein 5) (NCBI)	11437.7	0.394709	0.12875	3.06569	0.00217168	0.00722494	9.75083	FALSE
BW25113_0694	kdpE	DNA-binding response regulator in two-component regulatory system with KdpD (NCBI)	443.319	0.394323	0.165055	2.38904	0.0168926	0.0433001	75.848	FALSE
BW25113_4269	ahr	putative oxidoreductase (VIMSS)	713.29	0.394155	0.104568	3.76935	0.000163674	0.000736617	0.734898	FALSE
BW25113_2043	wcaM	predicted colanic acid biosynthesis protein (NCBI)	487.76	0.393946	0.119548	3.2953	0.00098316	0.00361461	4.41439	FALSE
BW25113_2447	yffP	CPZ-55 prophage; predicted protein (NCBI)	93.6646	0.393425	0.233971	1.68151	0.0926631	0.17833	416.057	FALSE
BW25113_0936	ssuA	orf, hypothetical protein (VIMSS)	41.3078	0.39261	0.648766	0.605163	0.54507	0.68242	2447.37	FALSE
BW25113_3650	spoT	bifunctional (p)ppGpp synthetase II/ guanosine-3',5'-bis pyrophosphate 3'-pyrophosphohydrolase (NCBI)	29289.1	0.392587	0.112297	3.49598	0.000472327	0.00187507	2.12075	FALSE
BW25113_1915	yecF	hypothetical protein (NCBI)	1129.61	0.39099	0.144907	2.69822	0.00697119	0.0198077	31.3007	FALSE
BW25113_1315	ycjS	predicted oxidoreductase, NADH-binding (NCBI)	246.964	0.390906	0.1247	3.13478	0.00171981	0.00588785	7.72194	FALSE
BW25113_1246	oppD	oligopeptide transporter ATP-binding component (NCBI)	31374	0.390515	0.0832952	4.68832	2.75451e-06	1.80069e-05	0.0123678	FALSE
BW25113_0086	murF		11246.6	0.390184	0.0833116	4.68342	2.82121e-06	1.8416e-05	0.0126672	FALSE
BW25113_0029	ispH		9513.91	0.390016	0.136208	2.86338	0.00419147	0.0127596	18.8197	FALSE
BW25113_1660	ydhC	predicted transporter (NCBI)	2183.91	0.389792	0.219916	1.77246	0.076319	0.151689	342.672	FALSE
BW25113_1873	torY	TMAO reductase III (TorYZ), cytochrome c-type subunit (NCBI)	88.4717	0.38955	0.304812	1.278	0.201249	0.330392	903.606	FALSE
BW25113_1193	emtA	murein transglycosylase E (VIMSS)	2570.26	0.389115	0.111515	3.48935	0.00048419	0.00191877	2.17401	FALSE
BW25113_0843	ybjH	hypothetical protein (NCBI)	485.559	0.388906	0.15104	2.57486	0.0100281	0.0273483	45.0262	FALSE
BW25113_3641	slmA	putative transcriptional regulator (VIMSS)	4658.75	0.387724	0.143418	2.70346	0.00686218	0.0195394	30.8112	FALSE
BW25113_2977	glcG	hypothetical protein (NCBI)	349.349	0.38766	0.142017	2.72968	0.00633965	0.0182214	28.465	FALSE
BW25113_2828	lgt		3894.8	0.387109	0.0864747	4.47655	7.58577e-06	4.6091e-05	0.0340601	FALSE
BW25113_3129	prlF	predicted regulator (NCBI)	3.41092	0.386859	0.832758	0.464551	0.642253	0.759042	2883.72	FALSE
BW25113_1423	ydcJ	hypothetical protein (NCBI)	441.367	0.386602	0.212439	1.81982	0.068786	0.140074	308.849	FALSE
BW25113_2566	era		12228.3	0.385716	0.144974	2.66058	0.00780056	0.0219003	35.0245	FALSE
BW25113_1531	marA	multiple antibiotic resistance; transcriptional activator of defense systems (VIMSS)	1264.28	0.38569	0.129164	2.98604	0.00282617	0.00910606	12.6895	FALSE
BW25113_0708	phr	deoxyribodipyrimidine photolyase, FAD-binding (NCBI)	935.068	0.385615	0.0966698	3.98899	6.63555e-05	0.000326887	0.297936	FALSE
BW25113_2223	atoE	short chain fatty acid transporter (NCBI)	50.5284	0.385285	0.483966	0.796099	0.425974	0.57594	1912.62	FALSE
BW25113_0811	glnH	glutamine ABC transporter periplasmic protein (NCBI)	5759.81	0.383995	0.134943	2.8456	0.00443276	0.0133759	19.9031	FALSE
BW25113_1035	ycdY	hypothetical protein (NCBI)	3259.54	0.383908	0.0668871	5.73964	9.48753e-09	8.90674e-08	4.2599e-05	FALSE
BW25113_2555	yfhG	hypothetical protein (NCBI)	952.24	0.383845	0.119481	3.21261	0.00131535	0.00465256	5.90593	FALSE
BW25113_1917	yecC	predicted transporter subunit: ATP-binding component of ABC superfamily (NCBI)	849.904	0.38362	0.0894956	4.28646	1.81541e-05	0.000102385	0.0815118	FALSE
BW25113_0619	citA	sensory histidine kinase in two-component regulatory system with citB (NCBI)	670.033	0.383099	0.138484	2.76638	0.0056682	0.0165356	25.4502	FALSE
BW25113_1524	glsB		1799.65	0.382828	0.103519	3.69815	0.000217177	0.000946028	0.975122	FALSE
BW25113_0930	asnS		28911.4	0.3827	0.154475	2.47742	0.0132334	0.0347358	59.4181	FALSE
BW25113_2329	aroC	chorismate synthase (NCBI)	7186.39	0.382616	0.0641154	5.96761	2.40759e-09	2.4173e-08	1.08101e-05	FALSE
BW25113_4636	ybfI		8.38263	0.382045	0.677886	0.563583	0.573038	0.705157	2572.94	FALSE
BW25113_2120	yehM	hypothetical protein (NCBI)	151.802	0.381434	0.252743	1.50918	0.131254	0.235102	589.33	FALSE
BW25113_4028	yjbG	hypothetical protein (NCBI)	10.1503	0.381122	0.597499	0.637862	0.523564	0.666205	2350.8	FALSE
BW25113_0971	serT		75.606	0.381003	0.418	0.911491	0.362037	0.513852	1625.55	FALSE
BW25113_0935	ssuD	alkanesulfonate monooxygenase (NCBI)	72.924	0.380595	0.282235	1.3485	0.177496	0.298583	796.958	FALSE
BW25113_0948	rlmL	predicted methyltransferase (NCBI)	14742.6	0.379712	0.127379	2.98097	0.00287341	0.00923035	12.9016	FALSE
BW25113_3555	yiaG	predicted transcriptional regulator (NCBI)	311.889	0.379628	0.187303	2.02682	0.0426813	0.0946279	191.639	FALSE
BW25113_0479	fsr	predicted fosmidomycin efflux system (NCBI)	1248.42	0.379432	0.124943	3.03683	0.00239077	0.00786618	10.7346	FALSE
BW25113_1232	purU	formyltetrahydrofolate deformylase (NCBI)	5314.79	0.379416	0.0869871	4.36175	1.29027e-05	7.48425e-05	0.0579333	FALSE
BW25113_0561	tfaD	orf, hypothetical protein (VIMSS)	40.7554	0.379366	0.289123	1.31213	0.189478	0.314835	850.755	FALSE
BW25113_2706	srlM	DNA-binding transcriptional activator of glucitol operon (NCBI)	725.111	0.37901	0.319162	1.18752	0.235024	0.371099	1055.26	FALSE
BW25113_3778	rep	DNA helicase and single-stranded DNA-dependent ATPase (NCBI)	4304.35	0.376322	0.125633	2.99541	0.0027408	0.008868	12.3062	FALSE
BW25113_1062	pyrC	dihydroorotase (NCBI)	3619	0.376266	0.100868	3.73028	0.000191269	0.000843843	0.858796	FALSE
BW25113_1238	tdk	thymidine kinase (NCBI)	2198.2	0.376148	0.131839	2.85309	0.00432958	0.0131176	19.4398	FALSE
BW25113_0923	mukE		414.221	0.37565	0.201748	1.86198	0.0626063	0.130214	281.102	FALSE
BW25113_1762	ynjI	orf, hypothetical protein (VIMSS)	563.059	0.375568	0.113729	3.30231	0.000958913	0.00354	4.30552	FALSE
BW25113_3260	dusB	tRNA-dihydrouridine synthase B (NCBI)	35411.2	0.375456	0.179878	2.08728	0.0368627	0.0837394	165.514	FALSE
BW25113_0187	yaeR	orf, hypothetical protein (VIMSS)	935.134	0.374389	0.116287	3.21952	0.00128406	0.00455268	5.76544	FALSE
BW25113_3063	ttdT	predicted tartrate:succinate antiporter (NCBI)	415.495	0.373908	0.201483	1.85578	0.0634855	0.131554	285.05	FALSE
BW25113_1269	rluB	23S rRNA pseudouridylate synthase (NCBI)	15670.9	0.37374	0.121998	3.06348	0.00218776	0.00726766	9.82305	FALSE
BW25113_2417	crr		42060.7	0.373567	0.0855745	4.3654	1.26893e-05	7.37958e-05	0.056975	FALSE
BW25113_2330	prmB		8414.73	0.373255	0.0724247	5.15369	2.55405e-07	1.94508e-06	0.00114677	FALSE
BW25113_4504	ykfH	hypothetical protein (NCBI)	80.5245	0.372347	0.281949	1.32062	0.186628	0.311488	837.961	FALSE
BW25113_0960	yccS	orf, hypothetical protein (VIMSS)	3901.04	0.371865	0.110441	3.36708	0.000759681	0.00287805	3.41097	FALSE
BW25113_3634	coaD		1655.59	0.371435	0.109091	3.40483	0.000662046	0.00255352	2.97258	FALSE
BW25113_1358	ydaT	Rac prophage; predicted protein (NCBI)	61.4057	0.371001	0.269443	1.37692	0.168537	0.286199	756.73	FALSE
BW25113_0775	bioB	biotin synthase (NCBI)	255.466	0.370942	0.195736	1.89511	0.0580778	0.122214	260.769	FALSE
BW25113_0706	ybfD	hypothetical protein (NCBI)	30.4047	0.370827	0.376832	0.984064	0.325084	0.475727	1459.63	FALSE
BW25113_4033	malF	maltose transporter subunit (NCBI)	9429.9	0.370823	0.262809	1.411	0.158245	0.272105	710.52	FALSE
BW25113_2575	trmN	putative enzyme (VIMSS)	830.872	0.370372	0.177323	2.08868	0.0367363	0.0835476	164.946	FALSE
BW25113_4049	dusA	tRNA-dihydrouridine synthase A (RefSeq)	3616.16	0.369346	0.190485	1.93898	0.0525042	0.112602	235.744	FALSE
BW25113_3189	murA		26459.6	0.368475	0.090762	4.05979	4.9116e-05	0.000251362	0.220531	FALSE
BW25113_1021	pgaD	predicted inner membrane protein (NCBI)	115.959	0.368404	0.204705	1.79968	0.0719111	0.144792	322.881	FALSE
BW25113_2290	alaA	aspartate aminotransferase (NCBI)	5676.03	0.367278	0.133378	2.75366	0.00589332	0.0170811	26.461	FALSE
BW25113_0495	ybbA	predicted transporter subunit: ATP-binding component of ABC superfamily (NCBI)	584.563	0.367252	0.137057	2.67955	0.00737217	0.0208019	33.101	FALSE
BW25113_2179	yejE	predicted oligopeptide transporter subunit (NCBI)	600.648	0.36718	0.128774	2.85136	0.00435325	0.0131804	19.5461	FALSE
BW25113_0481	ybaK	hypothetical protein (NCBI)	1064.21	0.366089	0.0905517	4.04287	5.28009e-05	0.000267167	0.237076	FALSE
BW25113_0052	pdxA	4-hydroxythreonine-4-phosphate dehydrogenase (NCBI)	92.2097	0.365569	0.290937	1.25652	0.208927	0.339591	938.081	FALSE
BW25113_0199	metN	DL-methionine transporter subunit (NCBI)	3051.69	0.365396	0.144659	2.52591	0.01154	0.0308146	51.8145	FALSE
BW25113_3817	yigF	conserved inner membrane protein (NCBI)	190.454	0.365012	0.253469	1.44007	0.149849	0.260693	672.822	FALSE
BW25113_3493	pitA	phosphate transporter, low-affinity (NCBI)	14943.5	0.364605	0.100901	3.6135	0.000302093	0.00126074	1.3564	FALSE
BW25113_0087	mraY		8541.02	0.364184	0.0735658	4.95044	7.40446e-07	5.28823e-06	0.0033246	FALSE
BW25113_0176	rseP		24481.2	0.364046	0.0753647	4.83046	1.36221e-06	9.32721e-06	0.00611634	FALSE
BW25113_3981	secE		21344.3	0.363851	0.116536	3.12223	0.00179489	0.00611684	8.05907	FALSE
BW25113_2312	purF	amidophosphoribosyltransferase (NCBI)	2984.33	0.363597	0.0973797	3.73381	0.000188606	0.000833739	0.846841	FALSE
BW25113_4170	mutL	DNA mismatch repair protein (NCBI)	7263.86	0.363591	0.0647208	5.61784	1.93361e-08	1.75278e-07	8.68192e-05	FALSE
BW25113_4631	ykgQ		10.2646	0.362413	0.569337	0.636552	0.524417	0.666759	2354.63	FALSE
BW25113_1132	hflD	hypothetical protein (NCBI)	3469.4	0.358264	0.139299	2.5719	0.0101141	0.0275324	45.4122	FALSE
BW25113_3221	yhcH	hypothetical protein (NCBI)	986.176	0.357342	0.31853	1.12185	0.261926	0.403341	1176.05	FALSE
BW25113_3255	accB		31020.3	0.356134	0.142573	2.4979	0.0124931	0.0330054	56.0941	FALSE
BW25113_3968	rrsB		38093.4	0.355717	0.377223	0.942989	0.345686	0.496786	1552.13	FALSE
BW25113_3545	proK	tRNA-Pro (NCBI)	41.5827	0.355582	0.385188	0.92314	0.355934	0.506796	1598.14	FALSE
BW25113_0095	ftsZ		28669.8	0.355345	0.0575363	6.17602	6.5739e-10	7.00903e-09	2.95168e-06	FALSE
BW25113_0088	murD	UDP-N-acetylmuramoyl-L-alanyl-D-glutamatesynthetase (NCBI)	10947.8	0.355274	0.065129	5.45493	4.89931e-08	4.13945e-07	0.000219979	FALSE
BW25113_1830	prc	carboxy-terminal protease for penicillin-binding protein 3 (NCBI)	29515.7	0.355189	0.118351	3.00115	0.00268959	0.00872753	12.0763	FALSE
BW25113_0459	maa	maltose O-acetyltransferase (NCBI)	2257.32	0.354897	0.177125	2.00365	0.0451075	0.09921	202.533	FALSE
BW25113_0091	murC		13604.3	0.353497	0.0805273	4.38978	1.13468e-05	6.65064e-05	0.0509471	FALSE
BW25113_3393	hofO	hypothetical protein (NCBI)	40.0303	0.352799	0.375412	0.939765	0.347338	0.498999	1559.55	FALSE
BW25113_4016	aceK	bifunctional isocitrate dehydrogenase kinase/phosphatase protein (NCBI)	917.088	0.352748	0.245812	1.43503	0.151279	0.262365	679.243	FALSE
BW25113_0340	cynS	cyanate hydratase (NCBI)	85.1128	0.352442	0.250984	1.40424	0.160246	0.274936	719.506	FALSE
BW25113_0182	lpxB		8996.44	0.352418	0.14691	2.39887	0.0164456	0.0422752	73.8407	FALSE
BW25113_4422	rdlB		11.5365	0.351786	0.497811	0.706665	0.479775	0.625271	2154.19	FALSE
BW25113_4494	arpB		49.9089	0.351618	0.36325	0.967978	0.333055	0.483756	1495.42	FALSE
BW25113_1774	ydjJ	predicted oxidoreductase, Zn-dependent and NAD(P)-binding (NCBI)	180.301	0.351282	0.235158	1.49381	0.135225	0.24077	607.159	FALSE
BW25113_0094	ftsA		16084.3	0.351024	0.059548	5.89481	3.75109e-09	3.65161e-08	1.68424e-05	FALSE
BW25113_0378	yaiW	predicted DNA-binding transcriptional regulator (NCBI)	1680.42	0.35079	0.0779954	4.49757	6.8733e-06	4.22203e-05	0.0308611	FALSE
BW25113_1166	ariR		36.6996	0.350047	0.449793	0.778241	0.436427	0.585694	1959.56	FALSE
BW25113_2234	nrdA		24038.7	0.349881	0.13477	2.59613	0.00942795	0.0259167	42.3315	FALSE
BW25113_1247	oppF	oligopeptide transporter subunit (NCBI)	31814.5	0.349835	0.0780826	4.48031	7.45338e-06	4.53481e-05	0.0334657	FALSE
BW25113_1264	trpE	anthranilate synthase component I (NCBI)	236.32	0.34852	0.229834	1.5164	0.129419	0.232484	581.092	FALSE
BW25113_3911	cpxA	two-component sensor protein (NCBI)	6136.21	0.346884	0.0797542	4.34941	1.36503e-05	7.90763e-05	0.0612898	FALSE
BW25113_1098	tmk		2633.01	0.346779	0.0935771	3.70581	0.000210714	0.000920565	0.946108	FALSE
BW25113_0797	rhlE	RNA helicase (NCBI)	5500.21	0.346768	0.240448	1.44218	0.149252	0.260082	670.143	FALSE
BW25113_4650	yibS		15.8506	0.346631	0.442028	0.784183	0.432933	0.583235	1943.87	FALSE
BW25113_3003	yghA	oxidoreductase (NCBI)	185.302	0.346008	0.243978	1.41819	0.156135	0.269224	701.047	FALSE
BW25113_0573	cusF	periplasmic copper-binding protein (NCBI)	26.9449	0.345868	0.4278	0.80848	0.418814	0.570566	1880.48	FALSE
BW25113_2513	yfgM	hypothetical protein (NCBI)	12799.6	0.345409	0.0992405	3.48052	0.000500437	0.0019814	2.24696	FALSE
BW25113_4573	insZ		325.412	0.345019	0.205212	1.68128	0.0927093	0.17833	416.265	FALSE
BW25113_2387	fryB	predicted enzyme IIB component of PTS (NCBI)	26.4856	0.344659	0.40598	0.848955	0.395906	0.548366	1777.62	FALSE
BW25113_0979	cbdB	cytochrome bd-II oxidase, subunit II (NCBI)	177.777	0.343751	0.175483	1.95889	0.050126	0.108123	225.066	FALSE
BW25113_1876	argS		16191.5	0.343703	0.131218	2.61934	0.00881008	0.0244282	39.5573	FALSE
BW25113_3710	mdtL	multidrug efflux system protein (NCBI)	409.066	0.343631	0.147912	2.32322	0.0201674	0.0502776	90.5514	FALSE
BW25113_3793	wzyE		1921.74	0.343454	0.0921608	3.72669	0.000194014	0.000854271	0.871122	FALSE
BW25113_1311	ycjO	predicted sugar transporter subunit: membrane component of ABC superfamily (NCBI)	129.897	0.343416	0.344477	0.996919	0.318804	0.468797	1431.43	FALSE
BW25113_1270	btuR	cob(I)yrinic acid a,c-diamide adenosyltransferase (NCBI)	1990.61	0.343137	0.104513	3.28319	0.0010264	0.00374589	4.60852	FALSE
BW25113_0967	rlmI	predicted methyltransferase (RefSeq)	7118.4	0.343108	0.102992	3.3314	0.000864102	0.00323533	3.87982	FALSE
BW25113_3222	nanK	putative NAGC-like transcriptional regulator (VIMSS)	1159.51	0.342729	0.392417	0.87338	0.382456	0.535032	1717.23	FALSE
BW25113_1195	ymgE	predicted inner membrane protein (NCBI)	40.639	0.342142	0.368527	0.928404	0.353198	0.505042	1585.86	FALSE
BW25113_2182	bcr	bicyclomycin/multidrug efflux system (NCBI)	2908.08	0.341884	0.132633	2.57767	0.00994696	0.0271435	44.6618	FALSE
BW25113_2302	yfcG	predicted glutathione S-transferase (NCBI)	154.369	0.341786	0.199881	1.70995	0.0872755	0.169553	391.867	FALSE
BW25113_3150	yraP	hypothetical protein (NCBI)	3882.65	0.341459	0.137725	2.47928	0.0131647	0.0345756	59.1094	FALSE
BW25113_2791	truC	tRNA pseudouridine synthase (NCBI)	1910.24	0.341438	0.141162	2.41876	0.0155733	0.0401482	69.9243	FALSE
BW25113_0920	ycbC	conserved inner membrane protein (NCBI)	638.002	0.341204	0.115447	2.95551	0.00312153	0.00993372	14.0157	FALSE
BW25113_2511	der		22036.6	0.340431	0.145311	2.34277	0.0191411	0.0480729	85.9437	FALSE
BW25113_3546	eptB	orf, hypothetical protein (VIMSS)	2668.32	0.339855	0.22698	1.49729	0.134319	0.239347	603.091	FALSE
BW25113_4550	arfA	hypothetical protein (NCBI)	291.076	0.339819	0.145889	2.3293	0.0198433	0.0495943	89.0965	FALSE
BW25113_1443	ydcV	predicted spermidine/putrescine transporter subunit (NCBI)	173.875	0.339756	0.295798	1.14861	0.250718	0.390646	1125.72	FALSE
BW25113_2471	yffB	hypothetical protein (NCBI)	2537.44	0.339395	0.104373	3.25175	0.00114696	0.00412205	5.14983	FALSE
BW25113_2319	usg	hypothetical protein (NCBI)	4848.61	0.338976	0.0796846	4.25397	2.10012e-05	0.000116784	0.0942952	FALSE
BW25113_4456	glmZ	regulatory sRNA (NCBI)	1650.84	0.338292	0.120417	2.80935	0.00496418	0.0146924	22.2892	FALSE
BW25113_2446	yffO	CPZ-55 prophage; predicted protein (NCBI)	53.559	0.338208	0.243964	1.3863	0.165655	0.282483	743.789	FALSE
BW25113_3742	mioC	flavodoxin (NCBI)	5386.34	0.337634	0.159188	2.12097	0.0339242	0.0778989	152.32	FALSE
BW25113_3389	aroB	3-dehydroquinate synthase (NCBI)	22319.1	0.33761	0.114407	2.95096	0.0031679	0.0100395	14.2239	FALSE
BW25113_0028	fkpB	FKBP-type peptidyl-prolyl cis-trans isomerase (rotamase) (NCBI)	4488.03	0.337262	0.0861978	3.91265	9.12893e-05	0.000434887	0.409889	FALSE
BW25113_2684	mprA	DNA-binding transcriptional repressor of microcin B17 synthesis and multidrug efflux (NCBI)	5118.63	0.336724	0.0997051	3.3772	0.000732276	0.00278601	3.28792	FALSE
BW25113_1032	serX		25.4356	0.336681	0.671325	0.501517	0.616008	0.739644	2765.87	FALSE
BW25113_1613	manA	mannose-6-phosphate isomerase (VIMSS)	6170.65	0.336548	0.108453	3.10316	0.00191464	0.00647076	8.59673	FALSE
BW25113_2132	bglX	beta-D-glucoside glucohydrolase, periplasmic (NCBI)	7748.98	0.335361	0.0893472	3.75346	0.000174411	0.00078163	0.783104	FALSE
BW25113_2512	bamB	protein assembly complex, lipoprotein component (NCBI)	28543.6	0.334471	0.0690702	4.84248	1.2823e-06	8.82047e-06	0.00575751	FALSE
BW25113_1343	dbpA	ATP-dependent RNA helicase, specific for 23S rRNA (NCBI)	2381.28	0.334386	0.174625	1.91489	0.0555072	0.117845	249.227	FALSE
BW25113_4373	rimI	ribosomal-protein-alanine N-acetyltransferase (NCBI)	2062.13	0.334348	0.150162	2.22659	0.0259748	0.0624009	116.627	FALSE
BW25113_1589	ynfG	oxidoreductase, Fe-S subunit (NCBI)	95.0406	0.334299	0.21816	1.53236	0.125434	0.227222	563.198	FALSE
BW25113_1274	topA		69044.7	0.333924	0.0826869	4.03842	5.38128e-05	0.000271979	0.241619	FALSE
BW25113_0721	sdhC	succinate dehydrogenase cytochrome b556 large membrane subunit (NCBI)	14396.8	0.333556	0.499808	0.667368	0.504537	0.648805	2265.37	FALSE
BW25113_0314	betT	choline transporter of high affinity (NCBI)	3220.61	0.33353	0.213448	1.56259	0.11815	0.216834	530.493	FALSE
BW25113_2085	yegR	orf, hypothetical protein (VIMSS)	27.4166	0.332107	0.399975	0.830318	0.406359	0.558525	1824.55	FALSE
BW25113_3361	fic	stationary-phase protein, cell division (NCBI)	349.401	0.331771	0.21364	1.55294	0.120436	0.220308	540.759	FALSE
BW25113_3725	pstB		3377.54	0.3312	0.139353	2.3767	0.0174681	0.0445204	78.4319	FALSE
BW25113_4438	cyaR	sRNA effector of ompX mRNA instability, cAMP-induced; hfq-dependent (RefSeq)	236.931	0.330887	0.253862	1.30341	0.192434	0.318684	864.031	FALSE
BW25113_3067	rpoD		56133	0.33088	0.0941418	3.5147	0.000440246	0.00176125	1.9767	FALSE
BW25113_0175	cdsA		10544.8	0.330836	0.118023	2.80315	0.00506065	0.0149384	22.7223	FALSE
BW25113_3455	livG	leucine/isoleucine/valine transporter subunit (NCBI)	254.388	0.330728	0.14652	2.25723	0.0239938	0.058178	107.732	FALSE
BW25113_4227	ytfQ	predicted sugar transporter subunit: periplasmic-binding component of ABC superfamily (NCBI)	720.222	0.330156	0.24373	1.3546	0.175545	0.295647	788.198	FALSE
BW25113_0463	acrA	multidrug efflux system (NCBI)	17038.4	0.33015	0.0686966	4.80592	1.54043e-06	1.03886e-05	0.00691652	FALSE
BW25113_3115	tdcD	propionate kinase/acetate kinase C, anaerobic (RefSeq)	323.082	0.329801	0.424319	0.777247	0.437013	0.585911	1962.19	FALSE
BW25113_0217	yafT	predicted aminopeptidase (NCBI)	257.884	0.329769	0.17389	1.89642	0.0579043	0.121964	259.99	FALSE
BW25113_2313	cvpA	membrane protein required for colicin V production (NCBI)	1723.04	0.329692	0.110946	2.97166	0.00296197	0.00949443	13.2993	FALSE
BW25113_2217	rcsB	DNA-binding response regulator in two-component regulatory system with RcsC and YojN (NCBI)	14708.5	0.329365	0.0733547	4.49003	7.12126e-06	4.35642e-05	0.0319745	FALSE
BW25113_1254	yciB		2823.69	0.329245	0.109249	3.0137	0.00258079	0.00840493	11.5878	FALSE
BW25113_3849	trkH	potassium transporter (NCBI)	4242.74	0.328773	0.0818366	4.01743	5.88367e-05	0.000294381	0.264177	FALSE
BW25113_2477	bamC	lipoprotein-34 (VIMSS)	20896.5	0.32828	0.0875668	3.74891	0.000177602	0.000793716	0.797435	FALSE
BW25113_2270	yfbK	hypothetical protein (NCBI)	162.138	0.328232	0.256305	1.28063	0.200322	0.329708	899.447	FALSE
BW25113_0097	secM	orf, hypothetical protein (VIMSS)	4854.16	0.327768	0.0750782	4.36569	1.26723e-05	7.37926e-05	0.0568985	FALSE
BW25113_3698	yidB	orf, hypothetical protein (VIMSS)	451.157	0.327139	0.178331	1.83445	0.0665865	0.136714	298.973	FALSE
BW25113_1819	manZ	mannose-specific enzyme IID component of PTS (NCBI)	26111.7	0.326897	0.109477	2.98599	0.00282658	0.00910606	12.6913	FALSE
BW25113_1709	btuD		6.4376	0.326663	0.74982	0.435655	0.663087	0.774668	2977.26	FALSE
BW25113_0774	bioA	adenosylmethionine--8-amino-7-oxononanoate transaminase (NCBI)	292.023	0.326243	0.163326	1.9975	0.0457713	0.100166	205.513	FALSE
BW25113_4067	actP	acetate permease (NCBI)	640.098	0.326042	0.26949	1.20985	0.226337	0.362033	1016.25	FALSE
BW25113_2188	yejM	predicted hydrolase, inner membrane (NCBI)	9949.48	0.326041	0.120224	2.71195	0.00668886	0.0191147	30.033	FALSE
BW25113_1871	cmoB	predicted S-adenosyl-L-methionine-dependent methyltransferase (NCBI)	3272.22	0.325896	0.147962	2.20257	0.0276248	0.0654863	124.035	FALSE
BW25113_4108	yjdM	hypothetical protein (NCBI)	2419.42	0.32524	0.112045	2.90276	0.00369892	0.011447	16.6081	FALSE
BW25113_1015	putP	proline:sodium symporter (NCBI)	7167.85	0.324727	0.393959	0.824267	0.409788	0.561859	1839.95	FALSE
BW25113_1872	torZ	biotin sulfoxide reductase 2 (VIMSS)	480.173	0.32438	0.106007	3.05997	0.00221358	0.00733708	9.93896	FALSE
BW25113_3668	uhpB	sensor histidine protein kinase phosphorylates UhpA (VIMSS)	116.749	0.323581	1.54065	0.210028				FALSE
BW25113_3206	npr	phosphohistidinoprotein-hexose phosphotransferase component of N-regulated PTS system (Npr) (NCBI)	862.178	0.323561	0.127804	2.5317	0.0113512	0.0303647	50.9667	FALSE
BW25113_2901	bglA	6-phospho-beta-glucosidase A (NCBI)	9749.9	0.323346	0.105015	3.07906	0.00207658	0.00694468	9.32384	FALSE
BW25113_1562	hokD	Qin prophage; small toxic polypeptide (NCBI)	583.044	0.322872	0.0977864	3.30181	0.000960631	0.00354153	4.31323	FALSE
BW25113_3486	rbbA	fused ribosome-associated ATPase: ATP-binding protein/ATP-binding protein/predicted membrane protein (NCBI)	1345.41	0.322798	0.148276	2.17701	0.02948	0.0691521	132.365	FALSE
BW25113_1713	pheT		136450	0.322344	0.0794808	4.05563	5.00001e-05	0.000255012	0.224501	FALSE
BW25113_2114	metG	methionyl-tRNA synthetase (NCBI)	20679.6	0.321616	0.0896532	3.58733	0.000334075	0.00137499	1.5	FALSE
BW25113_3939	metB	cystathionine gamma-synthase (NCBI)	1673.59	0.320709	0.0849395	3.77574	0.000159533	0.000718699	0.716302	FALSE
BW25113_0185	accA		29645.3	0.32003	0.0854669	3.74449	0.000180763	0.00080543	0.811627	FALSE
BW25113_1784	yeaH	hypothetical protein (NCBI)	361.786	0.32002	0.176269	1.81552	0.0694441	0.141158	311.804	FALSE
BW25113_1727	yniC	predicted hydrolase (NCBI)	2575.3	0.319909	0.11068	2.89039	0.00384767	0.01185	17.276	FALSE
BW25113_3590	selB	selenocysteinyl-tRNA-specific translation factor (NCBI)	3976.22	0.319802	0.060832	5.25713	1.46319e-07	1.15355e-06	0.000656971	FALSE
BW25113_1209	lolB		2311.46	0.317242	0.0777409	4.08076	4.48895e-05	0.000232388	0.201554	FALSE
BW25113_4508	peaD	putative sensory transduction regulator (VIMSS)	33.9449	0.317101	0.392674	0.807541	0.419355	0.570955	1882.9	FALSE
BW25113_2152	yeiB	conserved inner membrane protein (NCBI)	1275.22	0.316958	0.0822908	3.85169	0.000117307	0.000541545	0.526706	FALSE
BW25113_1715	pheM		83.2027	0.315954	0.244347	1.29306	0.195992	0.323737	880.004	FALSE
BW25113_1610	tus	DNA replication terminus site-binding protein (NCBI)	1174.79	0.315936	0.129102	2.44718	0.0143978	0.037376	64.6463	FALSE
BW25113_1125	potB	spermidine/putrescine ABC transporter membrane protein (NCBI)	6174.72	0.31576	0.167459	1.8856	0.0593493	0.124597	266.479	FALSE
BW25113_3851	rrsA		31651.2	0.315475	0.378607	0.833251	0.404703	0.556762	1817.12	FALSE
BW25113_1360	ydaV	Rac prophage; predicted DNA replication protein (NCBI)	60.4503	0.315308	0.276594	1.13997	0.2543	0.394442	1141.81	FALSE
BW25113_0792	ybhR	predicted transporter subunit: membrane component of ABC superfamily (NCBI)	585.507	0.315248	0.147271	2.14059	0.0323069	0.0747944	145.058	FALSE
BW25113_3640	dut		5811.81	0.315149	0.0958979	3.28629	0.00101515	0.0037109	4.55804	FALSE
BW25113_0177	bamA		80568.1	0.314876	0.0747287	4.21358	2.51349e-05	0.000136927	0.112856	FALSE
BW25113_2591	rrsG		26346.1	0.314402	0.378888	0.829803	0.40665	0.558754	1825.86	FALSE
BW25113_4428	hokB		413.572	0.314373	0.107048	2.93675	0.0033167	0.0104299	14.892	FALSE
BW25113_2216	rcsD	phosphotransfer intermediate protein in two-component regulatory system with RcsBC (NCBI)	12569.3	0.314217	0.0493361	6.36891	1.90378e-10	2.1679e-09	8.54797e-07	FALSE
BW25113_4686	yshB	expressed protein (RefSeq)	672.919	0.313979	0.101928	3.08042	0.00206712	0.0069182	9.28136	FALSE
BW25113_0688	pgm	phosphoglucomutase (NCBI)	26318.8	0.313881	0.0812706	3.86218	0.000112381	0.000520954	0.50459	FALSE
BW25113_2218	rcsC	hybrid sensory kinase in two-component regulatory system with RcsB and YojN (RefSeq)	4994.53	0.313177	0.101012	3.1004	0.0019326	0.00652162	8.67738	FALSE
BW25113_3738	atpB		73900.2	0.312733	0.0945675	3.30698	0.000943087	0.00349309	4.23446	FALSE
BW25113_2385	ypdF	predicted peptidase (NCBI)	72.4325	0.312296	0.228669	1.36571	0.17203	0.290827	772.414	FALSE
BW25113_1128	roxA	orf, hypothetical protein (VIMSS)	9621.68	0.31171	0.0557019	5.59605	2.19292e-08	1.96398e-07	9.84623e-05	FALSE
BW25113_2892	recJ	ssDNA exonuclease, 5' --> 3'-specific (NCBI)	8225.32	0.311702	0.0851915	3.65884	0.000253359	0.00108881	1.13758	FALSE
BW25113_2770	ygcR	putative transport protein (VIMSS)	70.0912	0.310674	0.243573	1.27548	0.202138	0.331687	907.6	FALSE
BW25113_0023	rpsT		57006.4	0.31048	0.130816	2.37342	0.0176244	0.0448167	79.1338	FALSE
BW25113_2515	ispG		20425.7	0.31022	0.0560138	5.53827	3.0548e-08	2.68223e-07	0.000137161	FALSE
BW25113_0325	yahK	predicted oxidoreductase, Zn-dependent and NAD(P)-binding (NCBI)	1219.31	0.310117	0.123586	2.50932	0.0120965	0.0320712	54.3134	FALSE
BW25113_4537	yecJ		1436.52	0.309605	0.108618	2.85042	0.00436619	0.0132107	19.6042	FALSE
BW25113_2210	mqo	malate:quinone oxidoreductase (NCBI)	15362.3	0.308894	0.282344	1.09403	0.27394	0.418956	1229.99	FALSE
BW25113_0646	djlB	predicted chaperone (NCBI)	70.4813	0.308863	0.761284	0.405714	0.684953	0.791123	3075.44	FALSE
BW25113_0605	ahpC	alkyl hydroperoxide reductase, C22 subunit (NCBI)	66302.8	0.308693	0.0540905	5.70698	1.14996e-08	1.06615e-07	5.1633e-05	FALSE
BW25113_4616	istR		21.979	0.308234	0.484569	0.6361	0.524711	0.666759	2355.95	FALSE
BW25113_0142	folK		1279.3	0.305889	0.216814	1.41084	0.158292	0.272105	710.733	FALSE
BW25113_0112	aroP	aromatic amino acid transporter (NCBI)	2092.62	0.305783	0.0917007	3.33457	0.000854304	0.00320668	3.83583	FALSE
BW25113_2813	mltA	membrane-bound lytic murein transglycosylase A (NCBI)	5382.08	0.305773	0.10502	2.91157	0.00359614	0.0111615	16.1466	FALSE
BW25113_4632	ylbI		7.49546	0.30569	0.701062	0.436038	0.662809	0.774545	2976.01	FALSE
BW25113_3244	tldD	predicted peptidase (NCBI)	8531.41	0.305638	0.147431	2.07309	0.0381637	0.0860824	171.355	FALSE
BW25113_1767	ansA	cytoplasmic asparaginase I (NCBI)	6275.12	0.305583	0.0908523	3.36352	0.000769563	0.00291302	3.45534	FALSE
BW25113_1121	ycfZ		286.134	0.305467	0.211816	1.44213	0.149266	0.260082	670.202	FALSE
BW25113_4041	plsB	glycerol-3-phosphate acyltransferase (VIMSS)	17205	0.305137	0.103546	2.94688	0.00320999	0.0101299	14.4129	FALSE
BW25113_0788	ybhN	conserved inner membrane protein (NCBI)	82.6729	0.304938	0.306551	0.994739	0.319863	0.46993	1436.19	FALSE
BW25113_1418	cybB	cytochrome b(561) (VIMSS)	4042.94	0.304794	0.0815179	3.73898	0.000184771	0.000819211	0.82962	FALSE
BW25113_4375	prfC	peptide chain release factor 3 (NCBI)	24699.9	0.304094	0.108368	2.80612	0.00501415	0.0148207	22.5135	FALSE
BW25113_3960	argH	argininosuccinate lyase (NCBI)	1215.78	0.303459	0.0848475	3.57653	0.000348188	0.00142652	1.56336	FALSE
BW25113_1804	rnd	ribonuclease D (NCBI)	4135.87	0.303423	0.1635	1.8558	0.0634817	0.131554	285.033	FALSE
BW25113_2954	rdgB	putative deoxyribonucleotide triphosphate pyrophosphatase (NCBI)	3646.52	0.302518	0.101464	2.98153	0.00286816	0.00922012	12.878	FALSE
BW25113_2344	fadL	long-chain fatty acid outer membrane transporter (RefSeq)	34011.6	0.30191	0.121487	2.48512	0.0129507	0.0340736	58.1487	FALSE
BW25113_0398	sbcD	exonuclease, dsDNA, ATP-dependent (NCBI)	1786.09	0.301571	0.0742614	4.06095	4.88743e-05	0.000250698	0.219446	FALSE
BW25113_0393	rdgC	recombination associated protein (NCBI)	7145.45	0.301164	0.10608	2.83904	0.00452497	0.0136266	20.3171	FALSE
BW25113_3700	recF	recombination protein F (NCBI)	16.5701	0.300948	0.38424	0.783228	0.433493	0.583464	1946.39	FALSE
BW25113_1279	yciS	conserved inner membrane protein (NCBI)	2029.09	0.300597	0.105963	2.8368	0.00455684	0.0136858	20.4602	FALSE
BW25113_3707	tnaC		234.464	0.300521	0.446076	0.673698	0.500503	0.645115	2247.26	FALSE
BW25113_0157	yadS	conserved inner membrane protein (NCBI)	1259.85	0.300293	0.158047	1.90002	0.0574305	0.12108	257.863	FALSE
BW25113_0421	ispA		8348.74	0.29914	0.128806	2.3224	0.0202114	0.0503094	90.7491	FALSE
BW25113_4635	pauD		6.63402	0.299044	0.698531	0.428104	0.668576	0.778208	3001.9	FALSE
BW25113_0434	yajG	putative polymerase/proteinase (VIMSS)	8548.3	0.298933	0.114496	2.61085	0.00903174	0.0249655	40.5525	FALSE
BW25113_2568	lepB		18068.5	0.297985	0.10577	2.81728	0.00484323	0.0144202	21.7461	FALSE
BW25113_3013	yqhG	hypothetical protein (NCBI)	201.855	0.297978	0.203122	1.46699	0.142379	0.250915	639.283	FALSE
BW25113_3238	yhcN	orf, hypothetical protein (VIMSS)	516.93	0.297726	0.203832	1.46064	0.144114	0.253075	647.071	FALSE
BW25113_0757	galK	galactokinase (NCBI)	19305.8	0.297572	0.164649	1.80731	0.070714	0.14296	317.506	FALSE
BW25113_2171	yeiP	putative elongation factor (VIMSS)	9184.27	0.29673	0.0874772	3.39208	0.000693633	0.00265705	3.11441	FALSE
BW25113_2955	yggW	coproporphyrinogen III oxidase (NCBI)	4468.13	0.296103	0.102386	2.89202	0.00382776	0.0118084	17.1866	FALSE
BW25113_2998	yghW	hypothetical protein (NCBI)	80.7508	0.295644	0.243513	1.21408	0.224718	0.36029	1008.99	FALSE
BW25113_2942	metK		18094.1	0.295379	0.121457	2.43197	0.015017	0.0387874	67.4265	FALSE
BW25113_3186	rplU		161226	0.295345	0.108123	2.73156	0.00630362	0.0181295	28.3032	FALSE
BW25113_4036	lamB	maltoporin precursor (NCBI)	42100.4	0.294284	0.275865	1.06677	0.286075	0.432347	1284.48	FALSE
BW25113_2893	dsbC	protein disulfide isomerase II (NCBI)	4212.1	0.293665	0.0736252	3.98865	6.64492e-05	0.000326989	0.298357	FALSE
BW25113_1374	pinR		153.072	0.293529	0.156307	1.87789	0.0603959	0.126222	271.178	FALSE
BW25113_1676	pykF	pyruvate kinase (NCBI)	40711.5	0.293141	0.0819859	3.5755	0.000349553	0.0014295	1.56949	FALSE
BW25113_3322	gspB	part of gsp divergon involved in type II protein secretion (NCBI)	165.397	0.293056	0.17767	1.64944	0.0990581	0.188839	444.771	FALSE
BW25113_2746	ispF		33.9697	0.292994	0.405618	0.72234	0.470085	0.616772	2110.68	FALSE
BW25113_1207	prs		34639.8	0.292943	0.113308	2.58537	0.00972753	0.0266259	43.6766	FALSE
BW25113_3454	livF	ATP-binding component of leucine transport (VIMSS)	209.856	0.292653	0.181248	1.61466	0.106385	0.199997	477.669	FALSE
BW25113_4060	yjcB	orf, hypothetical protein (VIMSS)	250.203	0.292022	0.20648	1.41429	0.157278	0.270777	706.178	FALSE
BW25113_2534	yfhR	predicted peptidase (RefSeq)	167.955	0.291908	0.260658	1.11989	0.262761	0.404206	1179.8	FALSE
BW25113_1563	relE	Qin prophage; toxin of the RelE-RelB toxin-antitoxin system (NCBI)	1507.35	0.291581	0.0926881	3.14583	0.00165614	0.00569601	7.43607	FALSE
BW25113_2586	yfiM	predicted protein (RefSeq)	1894.45	0.290815	0.254641	1.14206	0.25343	0.394048	1137.9	FALSE
BW25113_0905	ycaO	orf, hypothetical protein (VIMSS)	22357.9	0.290786	0.0960931	3.02608	0.00247745	0.00812153	11.1237	FALSE
BW25113_0054	lptD		35758.5	0.290632	0.118597	2.45058	0.0142625	0.0371107	64.0387	FALSE
BW25113_1564	relB		1123.1	0.289624	0.0907894	3.19007	0.00142239	0.00497681	6.38655	FALSE
BW25113_3792	wzxE	O-antigen translocase (NCBI)	3588.18	0.288835	0.0749968	3.8513	0.000117494	0.000541852	0.527548	FALSE
BW25113_1235	rssB	response regulator of RpoS (NCBI)	2159.69	0.288754	0.0724183	3.9873	6.68295e-05	0.000328499	0.300064	FALSE
BW25113_3170	rimP		14182.8	0.28726	0.126456	2.27163	0.023109	0.0564552	103.76	FALSE
BW25113_0406	tgt	queuine tRNA-ribosyltransferase (NCBI)	21733.2	0.286909	0.0812747	3.53012	0.000415371	0.0016757	1.86502	FALSE
BW25113_2554	glrR	predicted DNA-binding response regulator in two-component system (NCBI)	1660.48	0.286645	0.0998547	2.87062	0.00409672	0.0124797	18.3943	FALSE
BW25113_3651	trmH	tRNA (Guanosine-2'-O-)-methyltransferase (NCBI)	3541.19	0.286641	0.113976	2.51492	0.0119059	0.0316782	53.4574	FALSE
BW25113_2262	menB	naphthoate synthase (NCBI)	6392.51	0.286399	0.0787874	3.63509	0.000277884	0.00118398	1.2477	FALSE
BW25113_4648	ysaC		8.97057	0.285956	0.669697	0.426993	0.669384	0.77837	3005.54	FALSE
BW25113_2826	ppdA	hypothetical protein (NCBI)	87.2522	0.285893	0.190243	1.50278	0.132896	0.237568	596.702	FALSE
BW25113_3627	waaR	UDP-D-galactose:(glucosyl)lipopolysaccharide- alpha-1,3-D-galactosyltransferase (NCBI)	16.9282	0.285883	0.386145	0.740351	0.459087	0.605524	2061.3	FALSE
BW25113_4262	lptG		6471.3	0.285685	0.112152	2.54731	0.0108558	0.0291441	48.7426	FALSE
BW25113_0964	yccT	hypothetical protein (NCBI)	97.5285	0.285522	0.29701	0.96132	0.336391	0.487337	1510.4	FALSE
BW25113_2953	yggU	orf, hypothetical protein (VIMSS)	1756.59	0.285219	0.109981	2.59335	0.00950467	0.0260636	42.676	FALSE
BW25113_2526	hscA		28052.4	0.28423	0.102094	2.78399	0.00536941	0.015751	24.1086	FALSE
BW25113_3972	murB		5122.13	0.283772	0.0907747	3.12612	0.0017713	0.00605027	7.95316	FALSE
BW25113_3414	nfuA	predicted gluconate transport associated protein (NCBI)	13386.1	0.283415	0.078414	3.61434	0.000301109	0.00125961	1.35198	FALSE
BW25113_4502	yeiW	hypothetical protein (NCBI)	262.533	0.283403	0.181486	1.56157	0.118389	0.217184	531.566	FALSE
BW25113_1859	znuB	high-affinity zinc transporter membrane component (NCBI)	1336.72	0.283305	0.0876945	3.23059	0.00123533	0.0043973	5.54663	FALSE
BW25113_2505	yfgH	predicted outer membrane lipoprotein (NCBI)	63.447	0.283248	0.228725	1.23838	0.215576	0.34888	967.937	FALSE
BW25113_0834	yliF	predicted diguanylate cyclase (NCBI)	258.564	0.282463	0.22324	1.26529	0.205767	0.335674	923.894	FALSE
BW25113_2594	rluD		8394.4	0.281977	0.0972674	2.89899	0.00374367	0.0115695	16.8091	FALSE
BW25113_1265	trpL		4.80021	0.281894	0.763854	0.369042	0.712097	0.810361	3197.31	FALSE
BW25113_3329	gspH	predicted general secretory pathway component, cryptic (NCBI)	38.7155	0.280855	0.300222	0.935492	0.349535	0.501511	1569.41	FALSE
BW25113_4172	hfq		24051.6	0.280836	0.05957	4.71439	2.42438e-06	1.59657e-05	0.0108855	FALSE
BW25113_2593	yfiH	hypothetical protein (NCBI)	4549.01	0.280381	0.097607	2.87255	0.00407173	0.0124289	18.2821	FALSE
BW25113_1060	bssS	orf, hypothetical protein (VIMSS)	5060.51	0.280261	0.10749	2.60733	0.00912518	0.0252082	40.9721	FALSE
BW25113_1773	ydjI	predicted aldolase (NCBI)	238.153	0.280117	0.160329	1.74714	0.0806129	0.158675	361.952	FALSE
BW25113_2194	ccmH	heme lyase, CcmH subunit (NCBI)	575.694	0.279651	0.154115	1.81456	0.0695921	0.14133	312.468	FALSE
BW25113_3866	yihI	hypothetical protein (NCBI)	4564.59	0.278797	0.0846918	3.29191	0.000995106	0.00364357	4.46803	FALSE
BW25113_3350	kefB	glutathione-regulated potassium-efflux system protein (NCBI)	1576.46	0.278415	0.129129	2.15611	0.0310752	0.0723633	139.528	FALSE
BW25113_1745	astB	succinylarginine dihydrolase (NCBI)	1198.02	0.278329	0.990885	0.280889	0.778795	0.858554	3496.79	FALSE
BW25113_2844	yqeF	putative acyltransferase (VIMSS)	6168.99	0.27819	0.581897	0.478075	0.632597	0.752195	2840.36	FALSE
BW25113_3588	aldB	aldehyde dehydrogenase B (lactaldehyde dehydrogenase) (VIMSS)	236.567	0.277962	0.246796	1.12628	0.260046	0.40127	1167.61	FALSE
BW25113_2985	yghS	predicted protein with nucleoside triphosphate hydrolase domain (NCBI)	50.3081	0.277701	0.277564	1.00049	0.317072	0.467089	1423.65	FALSE
BW25113_3811	xerC	site-specific tyrosine recombinase XerC (NCBI)	3776.6	0.277599	0.104121	2.66611	0.00767357	0.0215843	34.4543	FALSE
BW25113_0912	ihfB	integration host factor subunit beta (NCBI)	10336.9	0.27747	0.0665039	4.17224	3.01614e-05	0.000161752	0.135425	FALSE
BW25113_2969	yghE	predicted secretion pathway protein, L-type protein (pseudogene) (RefSeq)	1244.92	0.27734	0.179678	1.54354	0.1227	0.223461	550.922	FALSE
BW25113_3184	yhbE	conserved inner membrane protein (NCBI)	11886	0.27688	0.173806	1.59304	0.111151	0.207045	499.069	FALSE
BW25113_1808	yoaA	conserved protein with nucleoside triphosphate hydrolase domain (NCBI)	3193.07	0.276768	0.0856203	3.2325	0.00122711	0.00437499	5.50972	FALSE
BW25113_2960	trmI	tRNA(m7G46)-methyltransferase (NCBI)	6314.43	0.276345	0.116128	2.37967	0.0173284	0.0442397	77.8044	FALSE
BW25113_1131	purB		11717.7	0.276254	0.0862469	3.20305	0.00135979	0.00479836	6.10544	FALSE
BW25113_1210	hemA		5230.97	0.275983	0.101114	2.72942	0.00634459	0.0182239	28.4872	FALSE
BW25113_2796	sdaC	predicted serine transporter (NCBI)	139672	0.275426	0.187565	1.46843	0.141987	0.250585	637.522	FALSE
BW25113_3701	dnaN		8914.38	0.275401	0.129645	2.12427	0.0336478	0.0774679	151.079	FALSE
BW25113_0786	ybhL	predicted inner membrane protein (NCBI)	2927.3	0.274579	0.13127	2.09171	0.0364641	0.083055	163.724	FALSE
BW25113_0890	ftsK	DNA-binding membrane protein required for chromosome resolution and partitioning (NCBI)	21947.3	0.274562	0.0496966	5.52476	3.29932e-08	2.87439e-07	0.000148139	FALSE
BW25113_0726	sucA	alpha-ketoglutarate decarboxylase (NCBI)	118555	0.274323	0.175158	1.56614	0.117315	0.215743	526.743	FALSE
BW25113_2792	yqcC	hypothetical protein (NCBI)	664.995	0.273958	0.166322	1.64715	0.0995268	0.189329	446.875	FALSE
BW25113_3670	ilvN	acetolactate synthase small subunit (NCBI)	2558.65	0.27316	0.16496	1.65591	0.0977394	0.186643	438.85	FALSE
BW25113_0887	cydD		3876.96	0.272997	0.0956305	2.85471	0.00430763	0.0130688	19.3413	FALSE
BW25113_3839	tatC	TatABCE protein translocation system subunit (NCBI)	6032.35	0.272376	0.117683	2.31449	0.0206407	0.0512357	92.6769	FALSE
BW25113_2782	mazF	toxin of the ChpA-ChpR toxin-antitoxin system, endoribonuclease (NCBI)	1040.51	0.272275	0.141725	1.92115	0.0547123	0.116609	245.658	FALSE
BW25113_2041	rfbB	dTDP-glucose 4,6 dehydratase, NAD(P)-binding (NCBI)	16980.4	0.270807	0.165759	1.63373	0.102315	0.193891	459.393	FALSE
BW25113_0879	macB	fused macrolide transporter subunits of ABC superfamily: ATP-binding component/membrane component (NCBI)	1750.17	0.269783	0.104871	2.57253	0.0100959	0.0274996	45.3306	FALSE
BW25113_0081	mraZ	hypothetical protein (NCBI)	6759.25	0.26941	0.0817948	3.29373	0.00098867	0.00362797	4.43913	FALSE
BW25113_3248	yhdE	Maf-like protein (NCBI)	3604.75	0.268979	0.0679249	3.95995	7.49646e-05	0.000364486	0.336591	FALSE
BW25113_2322	yfcJ	predicted transporter (NCBI)	637.706	0.267947	0.191692	1.3978	0.162173	0.277922	728.156	FALSE
[truncated: 3,280 more rows]

## Sheet: yrfF_kanR vs wt
# Diferential expression of BW25113 yrfF::kanR versus BW25113 using DESeq2
[truncated: 4,494 more rows]
