# Supplementary material for: High-throughput mapping of the phage resistance landscape in E. coli
Source: PLoS Biol. 2020 Oct 13;18(10):e3000877. doi: 10.1371/journal.pbio.3000877 (PMC7553319; doi:10.1371/journal.pbio.3000877)
Supplement: S8 Table — RB-TnSeq, random barcode transposon site sequencing. (XLSX) [file pbio.3000877.s016.xlsx]

## Sheet: Info
S8 Table
This file contains RB-Tnseq BL21 data for diverse phages
Planktonic Assay	sheet provide fitness score data for each gene at different condition. Column headers provide information on phages and its multiplicity of infection value.
Solid plate assay	sheet provide fitness score data for each gene at different condition. Column headers provide information on phages and its multiplicity of infection value.
BL21_hits_fit5	sheet provides filtered data that pass our stringent filters (Methods)
Fig7A data	dataset used in generating Fig 7 heatmap in the main text

## Sheet: Planktonic Assays
sysName	desc	set1IT005 NoPhageControl	set1IT006 T4_phage 0.28125 MOI	set1IT007 T4_phage 0.028125 MOI	set1IT008 T4_phage 0.0028125 MOI	set1IT009 T4_phage 0.00028125 MOI	set1IT010 T7_phage 0.0469 MOI	set1IT011 T7_phage 0.000469 MOI	set1IT012 T7_phage 0.0000469 MOI	set1IT013 T7_phage 0.00000469 MOI	set1IT018 NophageControl	set1IT019 T4_phage 0.028125 MOI	set1IT020 T4_phage 0.0028125 MOI	set1IT021 T4_phage 0.00028125 MOI	set1IT022 T7_phage 0.0469 MOI	set1IT023 T7_phage 0.000469 MOI	set1IT024 T7_phage 0.0000469 MOI	set1IT025 T7_phage 0.00000469 MOI	set1IT030 NophageControl	set1IT031 T5_phage 46.88 MOI	set1IT032 T5_phage 4.688 MOI	set1IT033 T5_phage 0.4688 MOI	set1IT034 T5_phage 0.04688 MOI	set1IT035 T5_phage 0.004688 MOI	set1IT036 T6_phage 46.88 MOI	set1IT037 T6_phage 4.688 MOI	set1IT038 T6_phage 0.4688 MOI	set1IT039 T6_phage 0.04688 MOI	set1IT040 T6_phage 0.004688 MOI	set1IT041 NophageControl	set1IT050 Time0	set1IT054 NophageControl	set1IT059 LZ4_phage 14.063 MOI	set1IT060 LZ4_phage 1.4063 MOI	set1IT061 LZ4_phage 0.14063 MOI	set1IT062 LZ4_phage 0.014063 MOI	set1IT063 LZ4_phage 0.0014063 MOI	set1IT064 NophageControl	set1IT065 Cev1_phage 6.25 MOI	set1IT066 Cev1_phage 0.625 MOI	set1IT067 Cev1_phage 0.00625 MOI	set1IT068 Cev2_phage 7.813 MOI	set1IT069 Cev2_phage 0.07813 MOI	set1IT070 Cev2_phage 0.007813 MOI	set2IT082 NoPhageControl	set2IT085 T2_phage_9.6875_MOI	set2IT086 T3_phage_3.4375_MOI	set2IT087 T7_phage_31.25_MOI	set2IT088 lambda1857_phage_12.5_MOI
ECD_03488/waaG	UDP-glucose:(heptosyl)lipopolysaccharide alpha-1,3-glucosyltransferase; lipopolysaccharide core biosynthesis protein; lipopolysaccharide glucosyltransferase I	-0.499951	18.1819	17.8595	18.1007	16.2605	16.7326	17.8179	16.7745	17.7013	-1.32201	17.5334	17.6179	17.3027	16.5732	16.2136	16.6546	16.6457	-0.816135	2.76256	3.15193	2.97424	2.60311	2.66883	4.13178	2.47943	3.32761	3.06734	2.49126	-1.0338	0.345655	-0.288983	3.20391	4.32773	2.93991	2.37501	3.82543	-1.30259	2.22612	2.71641	3.99571	3.65443	2.78479	2.08736	-0.487259	6.4665	13.8177	17.449	3.62188
ECD_03477/waaF	ADP-heptose:LPS heptosyltransferase II	-0.0581921	17.4789	17.0522	17.2012	15.3687	10.1397	13.8421	10.8321	15.4452	-0.504327	16.3651	17.0311	16.3656	10.0765	9.80663	9.98997	8.59335	-2.25753	3.7958	4.20696	3.14979	3.1574	2.90601	4.59058	3.17307	3.99379	2.97999	2.31659	-0.534741	-2.45774	-0.0366974	2.23385	1.50759	1.2134	1.3453	2.04461	-2.29235	5.62499	1.37923	6.41419	2.72209	1.5435	1.31116	-1.95842	5.99965	12.0248	15.5114	3.37085
ECD_03257/ompR	response regulator in two-component regulatory system with EnvZ	-1.07305	2.07285	1.99249	2.7758	1.70866	2.26127	2.03611	1.9262	2.55652	-1.0691	1.94383	1.95272	1.77723	2.10522	2.09361	2.09846	2.11854	0.0133316	2.33793	2.31953	2.32729	2.31857	2.14669	2.31892	2.29505	2.30341	2.23971	1.78885	-0.508716	-0.128398	-1.24457	1.46407	0.685188	0.502432	0.604108	1.00232	-1.26834	17.202	16.5583	17.1611	1.51484	0.712558	0.439129	-2.21453	-2.45744	-1.1344	1.46055	-0.0471014
ECD_00359/tsx	nucleoside channel, receptor of phage T6 and colicin K	0.18293	1.73419	0.680033	0.255288	0.101404	0.843957	0.639999	0.239979	0.545426	0.166855	0.392151	0.446367	0.550819	0.488769	1.15405	0.467146	0.672743	-0.0100205	0.435778	0.385149	0.780405	0.3458	0.62234	14.4905	10.9443	9.95748	15.4256	15.9	0.178042	0.106328	0.160618	15.6158	15.5037	15.6249	15.7581	15.569	-0.0479786	0.356272	0.919229	0.818996	0.241003	2.0137	0.82272	-0.264705	6.21305	2.82969	4.49674	3.43939
ECD_00933/ompF	outer membrane porin 1a (Ia	-2.05387	2.21592	2.14744	2.20408	1.68506	2.09276	2.05828	2.00274	1.95142	-0.912855	1.27103	1.29803	1.22885	1.33584	1.32237	1.31693	1.35438	-0.835165	1.51987	1.50209	1.51462	1.52575	1.43556	1.50585	1.52292	1.50927	1.80432	1.39236	-0.535885	0.0160223	-1.72102	1.12485	0.978436	1.21386	1.06	0.999426	-1.67228	15.3349	15.7259	15.6207	0.991219	0.971366	0.875937	-0.535401	5.11453	-0.200768	1.05291	1.47113
ECD_03256/envZ	sensory histidine kinase in two-component regulatory system with OmpR	-0.999638	2.21317	2.13619	2.22675	1.43444	2.2462	2.17546	2.05263	1.89677	-0.181379	2.04218	1.97053	1.7999	2.24434	2.09655	2.11876	2.12959	-0.723255	2.17347	2.1712	2.10478	2.10136	1.98293	2.09815	2.07541	2.08417	2.01414	1.66388	0.0147652	-0.157264	-1.08795	1.3045	1.25803	1.13526	1.39539	0.84396	-0.800473	14.8912	14.5283	13.8453	1.42271	1.23076	0.955206	-1.93755	-2.28613	0.278917	1.13266	-0.768444
ECD_00149/fhuA	ferrichrome outer membrane transporter	-0.0529896	-0.0653299	0.0700111	-0.0828354	0.329763	0.0395858	0.652959	0.176509	0.680914	0.0332164	0.0789501	0.0339256	0.0686727	0.126499	0.159163	0.465414	0.195637	0.107762	14.4645	14.2749	14.2832	14.2026	14.2034	2.22097	0.103902	0.0160591	0.184278	-0.133243	-0.139696	0.0922293	0.0966556	0.139013	-0.0377001	0.13891	3.04031	0.0988291	-0.0182536	0.14579	0.0626921	0.123362	14.1414	14.0145	13.828	0.118308	6.98397	1.97994	3.39846	2.60527
ECD_03489/waaQ	lipopolysaccharide core biosynthesis protein	-0.146623	11.7444	11.8484	11.8487	10.946	4.90494	7.70499	5.32648	9.40743	-0.565176	11.5407	11.6519	11.7378	4.15324	4.55886	3.89102	4.83162	-0.408428	0.641069	0.34407	0.451284	0.551943	0.68919	1.29847	0.690754	0.254263	0.146909	0.537844	-0.289204	0.176241	-0.633641	0.31761	1.82924	0.962044	0.583711	0.382222	-0.700334	0.461854	1.4338	2.09395	2.0873	0.464641	0.163283	0.361908	2.45066	7.36747	10.9981	1.6443
ECD_03270/malT	mal regulon transcriptional activator	0.0351756	0.0116764	0.107868	0.00138753	0.17428	0.053959	0.208114	0.126386	-0.00693225	-0.102184	0.237603	0.179854	0.00561976	0.328765	0.125703	1.0977	0.141668	0.17333	0.105114	0.298343	0.108274	0.0930542	0.228598	0.080385	0.0630941	0.0464635	-0.00893667	0.0968913	0.12812	0.0615693	0.0146024	0.10275	0.270262	0.13557	0.149683	-0.0245051	0.00920918	0.0147113	-0.0908531	-0.27022	0.112797	0.251052	0.27106	-0.226395	1.78922	0.491046	1.47452	11.1935
ECD_03908/lamB	maltose outer membrane porin (maltoporin)	-0.0476007	-0.358145	-0.321854	-0.214956	0.580578	-0.354359	-0.439575	-0.322173	-0.317352	0.126687	-0.237114	-0.279503	-0.426354	-0.275546	-0.273221	0.607227	-0.269256	-0.0222774	-0.240056	-0.276572	-0.263126	-0.250699	-0.340841	-0.274684	-0.0736708	-0.327367	-0.334482	-0.433711	0.136403	-0.0192766	0.0276365	-0.0561937	-0.431416	-0.37588	-0.334852	-0.220905	0.0266029	-0.442643	-0.219795	-0.301942	-0.375138	-0.468504	-0.033174	-0.00270699	2.00601	0.0758733	0.876801	11.0701
ECD_03458/yibL	ribosome-associated DUF2810 family protein	0.0664595	-1.06127	-1.26264	-1.09077	0.343995	-1.09669	-1.06716	-1.1818	-1.37639	0.277304	-1.04818	0.384826	-1.09648	-0.854411	-0.858723	-0.849422	-0.845895	-0.124512	-0.704761	-0.719049	-0.714791	-0.710972	-0.964163	-0.756472	-0.874382	-0.805424	-0.939641	-0.123094	-0.425215	-0.136139	-0.383561	-1.33901	-1.34709	-1.65777	-1.54297	0.643367	-0.28211	-1.32698	-0.583578	-1.54967	-1.21793	-1.34226	-1.56046	-0.643521	0.220073	0.199665	-0.725784	0.820918
ECD_04261	hypothetical protein	0.0423996	-0.340755	-0.420625	-0.378625	-1.29844	-0.398218	-0.379136	-0.46647	-0.610633	0.162131	-0.773351	-0.781369	-0.881276	-0.693781	-0.660273	3.34022	-0.640011	-0.0885595	-0.299602	-0.302155	-0.303469	-0.288279	-0.191095	-0.310715	-0.334834	-0.34468	0.328843	-0.797845	-0.216221	-0.0175928	0.310384	-0.487736	-0.514447	-0.695641	-0.596692	-0.573464	0.0812114	-0.501098	-0.308668	-0.63541	-0.455493	-0.55237	0.791491	-0.494705	-2.01401	-0.987792	0.186537	1.07046
ECD_00015/dnaJ	chaperone Hsp40, DnaK co-chaperone	-1.75068	-0.612263	-0.651835	3.12078	-0.218825	-0.637127	-0.294645	-0.676624	-0.845295	-0.507163	-0.246362	-0.233949	-0.298407	-0.162851	-0.163055	-0.150422	-0.153717	-0.548149	0.213472	0.214467	0.213057	0.22122	0.110081	0.514518	0.177712	0.422506	0.199525	0.929061	-0.675598	0.00252786	-0.961388	-0.559265	-0.589995	-0.188938	0.0930482	-0.764562	-0.864983	-0.559258	-0.620544	0.00612133	-0.518078	-0.377532	-0.385749	-1.50169	-0.878923	0.390974	4.14293	10.2613
ECD_00540/ybdF	DUF419 family protein	-0.0930581	-0.804399	-0.855481	7.19028	7.39159	-0.832532	8.92772	4.90295	-0.948543	0.156662	-0.301421	8.4643	8.62111	-0.27662	-0.281212	6.45638	-0.250772	0.584438	-0.481436	-0.482312	-0.461071	-0.473109	-0.531348	-0.486744	-0.507338	-0.496281	-0.453424	1.28983	-0.307719	-1.482	0.26326	-0.412698	-0.462154	-0.409085	-0.408319	-0.434354	0.47286	0.631426	5.52358	-0.401454	-0.368399	-0.386425	-0.519705	0.926241	-0.113858	3.86277	8.19809	-1.71234
ECD_03591/tnaC	tryptophanase leader peptide	-0.0429484	-1.47829	-1.61506	-1.48771	-1.10092	-1.53464	-1.50935	-1.52737	-1.73696	-0.577515	-1.43451	-1.45965	-1.53911	-1.25112	-1.23548	-1.22769	-1.24021	0.180005	-0.989237	-0.995345	-0.985765	-0.9656	-1.15146	-1.0125	-1.05574	-1.05656	-1.17475	-1.70122	-0.143024	-0.689564	0.419717	0.20313	-1.15788	-1.41627	-1.30718	1.41699	0.241098	-1.15575	-1.22377	-1.31785	0.29194	-1.11562	-1.25456	-1.00073	-5.14271	0.00810795	-1.3513	-1.14889
ECD_03506/rpoZ	RNA polymerase, omega subunit	0.579995	1.12283	0.936776	1.07994	2.31084	1.07613	1.10825	2.97279	0.812459	-0.916162	0.337968	0.369761	0.292586	0.576255	0.59322	0.57837	0.567725	-0.863944	0.583943	0.574711	0.579292	0.601859	0.373239	0.560872	0.527909	0.488612	0.396326	-0.157854	-0.297808	-0.1049	0.117386	1.59054	1.12639	0.872623	0.997525	0.650354	-0.192383	1.13189	1.01293	0.931244	1.25112	1.18162	1.01334	-0.100396	1.14747	1.15781	0.641326	8.8437
ECD_03453/yibI	DUF3302 family inner membrane protein	0.600677	1.07128	0.873069	1.03027	2.00511	1.04778	1.06446	0.961308	0.78271	0.386642	0.398837	2.67363	0.350601	0.585416	0.579804	0.592839	0.60095	0.24589	0.691583	0.677916	0.688044	0.698393	0.465579	0.646954	0.554479	0.598127	0.488884	-0.0819457	-0.261048	0.173551	0.709499	0.764896	0.75588	0.49353	0.585438	0.290901	-0.465312	0.777423	0.650206	0.583743	0.893708	0.783637	1.55934	0.788286	-3.31796	-1.04898	0.547834	2.02971
ECD_00014/dnaK	chaperone Hsp70, with co-chaperone DnaJ	-1.58177	3.54893	3.58799	3.50788	2.78113	3.55091	3.46908	3.43609	3.26851	-1.45731	2.65313	2.66327	2.57646	2.76441	2.93282	2.7316	2.81017	-0.849122	3.42793	3.40313	3.40489	3.40136	3.29703	3.39398	3.44242	3.39862	3.43944	3.13787	-2.28216	-0.961436	-2.01449	0.979644	0.943243	0.908687	0.94208	0.788754	-2.35451	0.969772	0.948499	0.88067	1.01937	0.889181	1.02134	-0.634853	2.1463	0.318346	3.03845	8.52743
ECD_04107/treC	trehalose-6-P hydrolase	-1.33116	4.21568	3.97141	4.02878	3.17554	4.01152	4.01188	3.9005	3.77257	-1.26295	3.57151	3.85532	3.42682	3.721	3.73116	3.70736	3.80053	-1.58335	4.28113	4.24676	4.22411	4.24747	4.11415	4.24038	4.31104	4.24435	4.26837	3.96125	-1.14399	0.149539	-0.666192	3.39525	2.9202	3.26669	2.88182	2.82155	-0.771697	3.06183	2.84362	2.9629	2.99341	2.89834	2.8699	-1.84805	0.64437	-0.476719	2.99905	8.41775
ECD_02061/osmF	putative ABC transporter periplasmic binding protein	0.75763	0.285559	0.202646	0.255495	-0.107297	0.260551	0.241218	0.203363	1.50156	0.0416429	0.156864	0.151946	0.110692	0.173774	0.168036	0.193654	0.182535	0.292244	-0.157784	-0.166723	-0.154059	-0.142707	-0.21462	-0.168621	-0.163476	-0.175641	-0.183304	-0.350222	0.750466	-1.62203	0.41402	-0.67051	-0.672096	-0.71123	-0.676485	-0.722382	-0.0826402	-0.658068	-0.698066	-0.704792	-0.62513	-0.700098	-0.807795	-0.372411	-1.70616	-1.03945	0.247578	-0.677851
ECD_03535/insX	putative IS protein	0.25472	-0.315437	0.0852711	-0.336851	0.272516	-0.369007	-0.338834	-0.422348	0.857656	0.183641	7.99352	-0.0657387	-1.04222	-0.755624	-0.736269	1.0781	-0.748352	-0.057036	-0.746779	-0.74885	-0.758106	-0.731012	-0.969558	-0.768693	-0.829768	-0.0898684	-0.951205	-0.266445	-0.17216	0.00116001	0.0992972	-1.1272	-1.14841	1.02048	0.44149	0.415578	-0.0565672	-1.13384	-0.380462	0.051491	-1.0478	-1.12071	-0.396691	-0.578657	0.908845	-0.405538	-0.9863	-0.483105
ECD_t00038/argW	tRNA-Arg	-0.0373195	1.00038	-0.551088	-0.517668	-0.99692	0.355865	-0.50292	-0.565106	-0.66793	-0.100158	-1.09387	0.668879	-1.13779	-1.05949	-1.05672	-1.03222	-1.03984	0.490348	-0.423844	-0.438353	-0.420879	-0.411297	-0.515073	-0.448668	-0.4573	-0.470541	-0.411326	0.00849595	0.106834	0.44067	0.594914	-0.81836	0.141331	-0.877432	-0.846957	-0.869849	-0.191839	-0.838803	-0.844578	0.24453	-0.84031	-0.847664	-0.966569	0.464684	0.791953	-0.797724	-1.44337	1.46519
ECD_03486/waaO	UDP-glucose:(Glucosyl) LPS alpha1,3-glucosyltransferase WaaO	0.239121	1.30557	1.11861	1.26636	2.11391	1.47637	1.49671	1.20064	0.970224	-0.416311	1.24214	1.34441	0.911766	0.891611	0.900388	0.894293	0.873568	-0.272789	0.814011	0.798718	0.793766	0.815357	0.559516	0.787519	0.769692	0.712573	0.704054	1.0349	-0.112104	-0.200049	0.0693534	0.641529	1.07665	0.729125	0.842154	0.726469	-0.182175	1.1425	1.37684	0.941497	0.737114	1.34019	0.840249	0.253936	1.13339	-0.0295532	0.161936	0.545226
ECD_04235/igoD	L-galactonate oxidoreductase; L-gulonate oxidoreductase	0.481257	0.387992	0.308819	0.349324	1.03498	0.331642	0.346672	0.260221	0.116088	-0.0855002	-0.09101	-0.0989466	-0.198079	-0.0125506	0.0213211	0.0062749	0.0397585	0.0763997	0.72872	0.149351	0.148156	0.162699	0.0307206	0.140956	0.120549	0.109116	0.11244	-0.345083	0.190178	0.425269	0.354362	-0.0461073	-0.0737078	0.872907	-0.15416	0.380645	-0.324294	-0.0610121	0.664625	-0.196229	-0.0140927	-0.111008	-0.324423	-0.163396	-3.90832	0.65386	0.298182	-0.906326
ECD_03681/cyaA	adenylate cyclase	-0.382153	0.727676	0.729084	0.639554	0.478342	0.72525	0.681027	0.720446	0.328408	-0.42061	0.561657	0.559402	0.64422	0.755298	0.765132	0.738278	0.779624	-0.317126	0.530315	0.50726	0.515136	0.580852	0.313714	0.496344	0.455107	0.57682	0.348836	0.320728	-0.460139	0.0300228	-0.528604	0.440586	0.732594	0.274041	0.341103	0.000917733	-0.155853	0.656403	0.580788	0.800008	0.492824	0.41349	0.228464	-0.791074	0.980458	0.248733	0.891452	7.86978
ECD_03907/malK	maltose ABC transporter ATPase	-0.122351	0.0347594	0.162805	0.0100441	-0.300378	-0.0503032	-0.051369	-0.0437904	-0.0190872	0.0813558	0.156473	0.139638	0.717502	0.191411	0.204049	0.202556	0.201015	-0.193103	0.264758	0.229662	0.247666	0.254211	0.417855	0.243853	0.194943	0.238067	0.167975	0.595904	-0.045678	-0.004321	0.0299647	0.568107	0.20158	0.0484941	-0.0215262	0.401276	-0.13196	0.0784376	0.180507	0.118525	0.150087	0.0137287	-0.142282	-0.260222	-0.00827128	0.0243866	0.54816	7.80815
ECD_02746/yqfE	hypothetical protein	0.146485	0.549417	0.484568	0.508095	-0.147891	0.528582	0.533104	0.49443	0.373655	-0.136398	0.416811	1.18335	0.369202	0.475134	0.443377	0.482973	0.479813	-0.376747	-0.115807	-0.126659	-0.121839	-0.120862	-0.221986	-0.121961	-0.186262	-0.15303	-0.160522	-0.42632	0.179166	-0.490697	0.216582	0.00866524	-0.0371216	-0.130934	-0.0415492	-0.167012	0.484867	-0.0127521	-0.0409757	0.532197	0.0165673	-0.0535409	-0.198834	0.630831	-3.19734	-0.182017	-0.258956	-1.72404
ECD_01053/yceJ	putative cytochrome b561	0.429181	7.69942	1.149	1.14701	0.88926	1.1818	1.17715	1.10862	1.06192	0.138156	0.479936	0.498888	0.453918	0.519781	0.512538	0.523495	0.520107	0.776925	1.08598	1.06948	1.08189	1.08249	0.976265	1.07734	1.06411	1.0612	1.08275	0.988142	0.130317	-0.855213	0.121491	0.924	0.871145	0.90847	0.922506	0.91622	0.0429522	0.858652	0.884581	0.895698	0.884795	0.885144	0.844809	0.837216	-1.02335	0.589801	0.858222	-0.0411684
ECD_01864/uspC	universal stress protein	0.222122	0.0768353	0.0409528	0.0822152	-0.213758	0.0706092	0.0644112	0.0172551	-0.0163673	-0.416848	-0.280147	-0.276472	-0.311583	-0.268765	-0.258887	-0.222118	-0.24877	0.853404	0.628847	0.616205	0.627706	0.645542	1.25856	0.619108	0.625588	0.612671	0.64471	0.462577	0.70027	0.691217	0.241828	0.0516625	0.0356117	0.0477002	0.0583496	-0.0351159	0.624026	0.0174483	0.0338978	-0.00379929	0.0407642	0.544467	-0.0656339	-0.678972	-2.04798	-0.00472422	-0.531857	0.0385833
ECD_01375/ydcA	putative periplasmic protein	-0.790202	-0.328986	-0.381291	-0.352579	0.576505	-0.366562	-0.317101	-0.392975	-0.397955	1.17264	-0.0403239	-0.0373142	-0.0672557	-0.0173235	-0.0265106	-0.00720409	0.00546731	-0.325859	-0.393914	-0.376875	-0.360135	-0.36213	-0.358119	-0.378743	-0.347731	-0.403305	-0.350118	-0.343747	0.930043	0.490822	-0.219083	-0.412596	-0.483979	-0.429576	-0.419903	-0.493775	-0.314054	-0.462231	-0.436253	-0.399092	-0.453373	-0.44415	-0.407921	1.28496	-0.491692	-0.823617	0.28309	-0.0347312
ECD_00913/ycaL	putative peptidase-related chaperone	0.0720292	-0.190276	-0.259218	-0.235101	-0.582115	-0.202508	-0.191606	-0.26475	-0.324323	-0.245761	0.226606	0.248048	0.196553	0.270551	0.263509	0.265678	0.285575	0.0930081	-0.136527	-0.170647	-0.16005	-0.143605	-0.236204	-0.143791	-0.182017	-0.154773	-0.160673	-0.283651	0.139275	-0.10203	1.2423e-05	-0.37352	-0.421412	-0.448793	-0.356922	-0.407376	-0.352343	-0.409143	-0.421892	-0.400057	-0.411873	-0.250089	-0.519773	0.0524538	2.38874	1.18743	0.247995	0.994186
ECD_00949	dihydro-orotate oxidase, FMN-linked	0.588964	-0.357762	-0.431821	-0.416382	-0.746248	-0.392454	-0.378757	1.29151	-0.492802	0.0502542	-0.285513	-0.271998	-0.315315	-0.251993	-0.262664	-0.243945	-0.255101	-0.491137	-0.693908	-0.704219	-0.695086	-0.00379936	-0.796732	-0.697124	-0.754252	-0.715339	-0.726924	-0.166219	-0.541131	0.217141	0.421841	-0.533212	-0.577506	1.06482	-0.509067	-0.608451	-0.29487	-0.563707	-0.546826	-0.567634	-0.568284	-0.557457	-0.702383	-1.79375	-1.09284	0.307413	-0.241506	0.385513
ECD_01080	endoribonuclease; RNA-binding protein	0.482383	1.69801	1.63254	1.62533	1.3478	1.65771	1.66543	1.58496	1.53438	-0.102417	1.474	1.48384	1.43365	1.5182	1.50676	1.50737	1.55085	-0.754063	0.590364	0.580996	0.592199	0.586367	0.481032	0.579599	0.581293	0.720591	0.59929	0.718261	-0.725391	-0.314883	-1.42073	0.537728	0.474423	0.529613	0.549499	0.54633	-0.517367	0.47816	0.511377	0.53545	0.500894	0.508448	0.471878	-1.52645	-0.981893	-1.01887	0.79399	7.49085
ECD_01600	SoxR iron-sulfur cluster reduction factor component; putative membrane protein of electron transport complex	0.107082	0.167235	0.13714	0.145655	0.0109129	0.137857	0.169248	0.0971892	0.105024	-0.747437	0.154745	0.157572	0.133069	0.179424	0.189764	0.192379	0.217575	-0.144183	0.197427	0.195036	0.212578	0.217751	0.15005	0.183445	0.221656	0.192306	0.216864	0.975599	-0.0402338	0.0406563	-4.12567	-0.72701	-0.800714	-0.740156	-0.756756	-0.778194	-0.400851	-0.739493	-0.708796	-0.745996	-0.736832	-0.796059	-0.763248	-0.562543	-1.00699	-1.32861	-0.330049	0.119278
ECD_01433	formate dehydrogenase-N, Fe-S (beta) subunit, nitrate-inducible	0.0647737	-0.421309	-0.452721	7.44399	-0.520764	-0.445798	-0.400769	-0.484398	-0.488534	-1.0959	-1.42622	-1.42428	-1.4383	-1.42299	-1.41721	-1.38207	-1.4247	-0.114593	-1.37983	-1.37105	-1.35546	-1.33971	-1.36352	-1.37397	-1.36756	-1.39583	-1.3372	-1.35389	-2.34809	-0.888651	-0.174992	-0.601424	-0.673618	0.690148	-0.604163	-0.705695	0.749064	-0.676446	-0.595053	-0.598539	-0.620748	-0.644348	-0.626935	-3.20929	-1.80716	-0.79845	-1.0887	-1.39708
ECD_00450	conserved protein, rhs-like protein	0.0938157	0.650282	0.587727	0.615811	0.151661	0.630603	0.634149	0.585274	0.544987	-0.843113	0.425227	0.383863	0.359278	0.447481	0.467216	0.47411	0.49526	-1.76164	1.41936	1.40175	1.41391	1.427	1.3822	1.40397	1.41237	1.40207	1.43423	1.21477	0.428702	0.530076	-0.615544	0.705117	0.665764	0.681524	0.697256	0.658014	-0.216992	0.667082	0.689753	0.668298	0.700181	0.715945	0.57254	-3.14791	-1.9584	0.0463107	0.495881	-0.614545
ECD_01970	suppressor of OmpF assembly mutants; putative outer membrane protein assembly factor; inner membrane-anchored periplasmic protein	-0.0959601	0.147022	0.0811531	0.118627	0.470101	7.35291	0.110836	0.0820722	0.187752	0.127762	0.407376	0.40991	0.354846	0.453183	0.446318	0.470488	0.4441	-0.354213	0.318513	0.280409	0.318996	0.313393	0.900779	0.289939	0.351329	0.303291	0.308126	0.139492	-0.0135028	-0.120059	-0.173678	0.410999	0.394917	0.850129	0.412489	0.378493	-0.152534	0.418585	0.378071	0.729278	0.484346	0.349345	0.399778	0.323555	-1.73161	0.40866	0.0673773	0.822215
ECD_04184	fimbrial protein involved in type 1 pilus biosynthesis	0.0321206	0.397092	-0.722313	-0.0075071	4.11465	4.40595	-0.681563	-0.768739	-0.243963	-0.0946143	-0.283688	1.02217	-0.393077	-0.202446	-0.169528	-0.188003	-0.146456	-0.223897	-0.460908	-0.465821	-0.466973	-0.452903	-0.584914	-0.474099	-0.49168	-0.504377	-0.500886	7.14448	0.36824	-0.270734	-1.1985	-0.90483	-0.930969	-0.0703528	-0.469678	7.31861	-0.55648	-0.917179	-1.0228	0.418333	-0.872439	-0.969448	0.351594	0.769606	-0.804003	0.264454	-0.87308	0.495252
ECD_00848	bacteriophage tail fiber protein	-0.0568314	0.043852	0.675539	0.00661055	-0.348694	0.0107191	0.0187963	-0.0306872	-0.086168	-0.459383	-0.0970172	7.17501	-0.140971	-0.0766672	-0.082148	-0.0629211	-0.0678434	0.276316	0.238272	0.229436	0.235985	0.24541	0.156352	0.227423	0.205905	0.220922	0.234014	0.0446562	0.344352	-1.44545	0.355573	0.44137	0.376782	0.355412	0.465609	0.361966	-0.194701	0.356034	0.366357	0.385584	0.396874	0.40769	0.279653	0.654071	-2.19073	1.08715	-0.178664	0.28528
ECD_02833	putative type II secretion protein GspI	0.00679007	0.513558	0.398761	7.1485	-0.23278	0.451226	0.476123	0.429812	0.299075	0.747319	0.576097	0.597599	0.529232	0.659206	0.642748	0.664931	0.672556	0.507549	0.78909	0.763866	0.788262	0.785297	0.691357	0.779552	0.766154	0.749232	0.762549	0.465489	0.627042	0.417906	-0.436483	0.473629	0.411209	0.321074	0.412389	0.791739	0.1086	0.420279	0.408791	0.371241	0.469566	0.389735	0.229034	-0.438989	0.173753	0.0867341	0.560287	0.464135
ECD_04293	inhibitor of glucose uptake	0.0138267	-0.875939	-0.91616	-0.90843	-0.791717	-0.901842	-0.253774	-0.938432	-1.07661	0.0921686	-0.849961	-0.83725	-0.898514	-0.776977	-0.777542	-0.756507	-0.765709	-0.534391	-1.20075	-1.18991	-1.18551	-1.16981	-1.25782	-1.20334	-1.23402	-1.24812	-0.872976	0.0687756	-0.223267	0.290425	-0.377217	0.562518	-0.753045	-0.747221	-0.742414	0.397704	0.44038	-0.724256	-0.762561	-0.773145	-0.682053	-0.788733	0.420653	0.507458	1.2082	-0.645547	-0.700299	0.958581
ECD_00231	peptide chain release factor 2	-0.25332	-0.291166	-0.333963	-0.318284	-0.960214	-0.320467	-0.301211	-0.359674	-0.51789	0.407608	-0.119039	-0.102871	-0.1829	-0.0251736	-0.0323084	-0.0401523	-0.00253808	0.276888	-0.259334	-0.251528	-0.244501	-0.23756	-0.341954	-0.253595	-0.299556	-0.293212	-0.297622	0.839387	-0.576241	0.00181583	0.23206	-0.295045	-0.322236	-0.349039	1.0932	-0.5196	-0.0448241	-0.304119	0.270892	0.23927	-0.270057	-0.365135	0.364491	0.914798	0.319457	-0.275305	-0.801401	-0.37734
ECD_02238	colicin V production protein	-0.568977	2.3312	2.26254	2.29905	1.77599	2.30414	2.29344	2.22411	2.14015	-2.17794	2.70067	2.70156	6.97133	2.75925	2.76599	2.74785	2.82473	-1.88256	1.85206	1.8312	1.84582	1.84924	1.76018	1.8161	1.87356	1.83571	1.87884	1.69978	-0.181943	-2.08507	0.683582	2.33664	2.29787	2.31953	2.36288	2.28571	0.0791047	2.31574	2.27205	2.2662	3.46358	2.31438	2.20413	-0.186442	-0.59979	-0.965161	1.698	0.594761
ECD_01097	fused glucose-specific PTS enzymes: IIB component/IIC component	-0.177925	-0.15637	-0.232071	-0.221934	-0.495077	-0.211525	-0.175014	-0.247727	-0.301293	-0.221463	0.0473912	0.0577668	0.0188837	0.0950906	0.0885028	0.109034	0.0920199	0.230175	-0.23573	-0.243738	-0.229344	-0.21708	-0.32501	-0.245129	-0.248104	-0.257607	-0.236953	-0.335965	-0.452066	0.0837246	-0.0122087	-0.255051	-0.303834	-0.273554	-0.254423	-0.257568	0.00190109	-0.316297	-0.271861	-0.247955	-0.287526	-0.278258	0.225619	0.979103	1.39822	0.589414	0.279124	6.86223
ECD_02769	uncharacterized protein	0.178206	-0.67568	-0.770759	-0.735378	-1.39804	-0.735204	-0.721581	-0.756931	-0.887699	0.0211877	-1.16647	-1.15765	-1.2125	-1.09133	-1.13172	-1.08416	-1.10519	0.445765	-0.312922	-0.318607	-0.313114	-0.308579	-0.408847	-0.317867	-0.382188	-0.364916	-0.344767	-0.289457	0.361576	0.0730928	0.536554	-0.124686	-0.188639	-0.270253	-0.178484	0.762559	0.386667	-0.15115	-0.171373	-0.222383	-0.122836	-0.196589	1.24097	0.616163	0.988374	0.407536	-0.227915	-0.942605
ECD_00941	NAD(P)H-dependent FMN reductase	-0.634879	0.364842	0.940503	0.311969	-0.0216869	0.338883	0.342393	0.274224	0.234185	0.560245	1.56294	1.58094	1.51893	1.62173	1.59693	1.59415	1.63355	-1.16756	0.44174	0.417108	0.433835	0.449062	0.333828	0.433387	0.414598	0.417655	0.408403	0.259673	-0.332682	-0.179396	-1.46985	0.0935178	0.0455602	0.0348169	1.80581	0.0383571	0.224729	0.0577071	0.0802611	0.0878079	0.0587771	0.0693764	-0.0567124	-0.528282	-1.57764	-1.04559	0.417897	-0.637892
ECD_01390	IS609 transposase B	-0.548705	0.302454	0.255298	0.288345	0.570993	0.267663	0.307114	0.224752	0.197535	0.61516	0.73343	0.736414	0.705763	0.766006	0.764462	0.774307	0.762986	0.919854	1.10486	1.09097	1.10161	1.11014	1.09373	1.09012	1.1306	1.09267	1.1374	1.06183	-0.572398	-0.251022	-0.513243	0.7054	0.629329	0.639659	0.943726	0.546092	-0.0581157	0.642978	0.649788	0.672777	0.66379	0.649242	0.632763	1.0076	-0.655593	0.80816	0.441254	-0.178281
ECD_03964	5-phospho-alpha-D-ribosyl 1,2-cyclic phosphate phosphodiesterase	0.0138882	-0.376551	-0.469524	-0.372683	0.456487	-0.45786	-0.42106	-0.496451	-0.593981	6.37996e-05	-0.144135	-0.148241	-0.241571	-0.0795141	-0.079008	-0.0885155	-0.107937	-0.115686	-0.177477	-0.18807	0.199364	0.218367	1.30512	-0.200336	-0.229033	1.25025	-0.246503	-0.314194	-0.0457994	0.219962	0.130959	-0.403955	-0.431183	-0.628626	-0.45326	-0.175683	-0.253569	-0.392738	-0.0978113	1.38411	-0.331483	-0.106052	-0.183089	-0.490632	1.19305	-0.138205	-0.514586	0.31907
ECD_03487	kinase that phosphorylates core heptose of lipopolysaccharide	-0.656807	5.65771	5.49625	5.59295	4.05852	5.66096	5.53117	5.47093	5.2428	-1.73877	4.12999	4.15907	4.03683	4.40186	4.39966	4.35359	4.42439	-1.64493	4.80576	4.76742	4.76648	4.76782	4.51725	4.75329	4.74941	4.72982	4.619	4.25087	-1.91102	-1.19754	-1.35543	3.85138	3.83038	3.5298	3.68583	3.28456	-0.706982	3.81199	3.66205	3.57019	3.9426	3.85722	3.62957	-1.14899	-1.09977	0.162541	3.34275	2.10238
ECD_01876	UPF0149 family protein	-0.0481223	-0.634294	-0.671627	-0.626516	-0.927304	-0.647805	-0.639417	3.62462	-0.735456	0.0881779	-0.544953	-0.550398	-0.584609	-0.535966	-0.533808	-0.496988	-0.523788	0.69866	0.928504	0.903761	0.920216	0.933689	0.92401	0.910195	0.935054	0.913582	0.949586	1.24181	0.688106	0.207732	-1.4911	-0.610427	-0.636452	-0.625854	-0.618075	-0.709178	-0.107435	-0.641334	-0.63475	-0.677254	-0.612708	-0.645393	-0.72465	-0.0356701	1.40649	-0.00479091	0.179563	-0.194498
ECD_03971	ribophosphonate triphosphate synthase complex putative catalytic subunit	-0.0999597	-0.344723	-0.31388	-0.426802	-0.748305	-0.503814	-0.468525	-0.543754	-0.191398	-0.255234	-0.580387	-0.587729	-0.697265	-0.520509	-0.518696	-0.525672	-0.542446	0.0953614	-0.673034	-0.681352	-0.690132	-0.682399	0.236296	-0.694843	-0.725973	-0.718413	-0.499499	-0.103019	0.00496156	0.146746	0.0917737	-0.432203	-0.456421	-0.420639	-0.100926	-0.751685	0.328856	-0.42324	-0.160363	-0.341093	-0.35956	-0.165879	-0.643143	0.149418	0.946479	-0.141205	-0.249295	-0.915743
ECD_01424	nitrate reductase 2 (NRZ), delta subunit (assembly subunit)	-0.297051	0.395494	0.373352	0.420183	0.326427	0.385469	0.398675	0.324641	0.326712	-0.468083	-0.47829	-0.474785	-0.505451	-0.467902	-0.473472	-0.447091	-0.450138	-0.0127973	0.493291	0.473618	0.492928	0.498307	0.490304	0.474183	0.565291	0.497281	0.566358	0.528882	-0.195634	0.342744	-0.364743	-0.121292	-0.193886	-0.129238	-0.106105	-0.230185	-0.0191958	-0.197746	-0.11517	-0.135845	-0.148613	-0.150576	-0.151333	-0.58803	-0.522569	-0.0709943	0.340804	0.0117395
ECD_03037	ribosome maturation factor for 30S subunits	-0.761639	2.29908	2.21112	2.23407	1.37513	2.24125	2.21513	2.13645	2.05018	-1.72841	2.09619	2.10404	1.97896	2.20773	2.19206	2.18154	2.25974	-1.32624	2.26287	2.2023	2.20708	2.22612	2.4797	2.20458	2.22236	2.20686	2.37064	2.06251	-0.639922	-0.405217	-2.11232	2.09383	2.0591	1.93024	2.05593	1.79678	-1.37694	2.02503	1.96919	1.93096	2.10712	2.03092	1.87882	-2.52902	-1.09486	6.47627	0.971609	1.5581
ECD_03962	ribose 5-phosphate isomerase B/allose 6-phosphate isomerase	0.132402	0.35059	0.258082	0.360193	-0.329748	0.272848	0.302198	0.232183	0.329055	0.0554891	0.593452	0.58096	0.483028	0.659471	0.840459	0.653911	0.638312	0.267122	0.479181	0.454544	0.453485	0.467899	0.91866	0.442687	0.425855	0.426774	0.406297	1.07385	0.145391	0.107043	0.0746195	0.538647	0.512253	0.324858	0.497232	0.609143	0.0281128	0.54643	0.946829	0.430134	0.621282	0.526031	0.334459	-0.167796	1.9181	-0.554952	6.46848	-1.44619
ECD_00969	putative CoA-binding protein	0.306863	-0.601594	-0.675311	0.0202433	-0.835033	-0.629525	-0.623705	-0.689321	-0.722895	0.140466	-0.747867	-0.731364	-0.762488	-0.704524	-0.713083	-0.68437	-0.719525	0.806802	-0.630297	-0.657637	-0.616541	-0.597525	-0.681894	-0.635128	-0.640836	-0.642238	-0.608475	-0.713984	-0.158848	-0.507464	-0.561331	-1.01566	-1.05903	-0.460738	-0.972377	-1.02513	-0.236895	-1.07032	0.592607	-1.04371	-1.05807	-1.02021	-1.11266	-0.107601	0.882465	-0.379129	-0.408727	1.98781
ECD_02539	transcriptional repressor of microcin B17 synthesis and multidrug efflux	0.328923	-0.622498	-0.559417	-0.666981	1.13966	-0.659742	-0.642047	-0.725639	-0.279724	-0.074423	-1.04912	-1.19231	-1.05961	-1.14229	-1.13675	-1.12469	0.920531	-0.269425	-1.27327	-1.2872	-1.27769	-1.15928	-1.18184	-1.27726	-1.32584	-1.2056	-0.954064	-1.43655	-0.177635	-0.0244826	-0.44613	-1.25285	-1.29969	-0.971167	-1.06944	-1.27298	-0.250196	-1.28633	-1.22494	-1.30531	-1.25371	-1.28644	-1.34441	1.02987	1.344	-0.703162	-0.844408	6.448
ECD_00843	phage baseplate assembly protein	0.214975	1.53055	1.31999	1.34977	0.963238	1.37815	1.35779	1.30508	1.24449	-0.207631	0.322324	0.324304	0.876496	0.36782	0.353472	0.347633	0.413882	0.309592	2.26066	2.22972	2.24127	2.22945	2.15671	2.23642	2.24395	2.25608	2.26305	2.07998	1.1406	0.62567	0.205645	0.589691	0.534849	0.51247	0.614898	0.512267	-0.504164	0.537086	0.514897	0.55168	0.54468	0.565056	0.422132	0.979081	3.16296	1.06442	1.18668	1.7887
ECD_02508	tmRNA-binding trans-translation protein	-0.078696	2.77112	3.10528	2.69678	2.1293	2.74044	2.68256	2.61641	2.58214	-2.64694	2.4219	2.4213	2.35821	2.51457	2.50625	2.48328	2.57085	-2.14485	2.59993	2.57054	2.562	2.57364	2.49419	2.56948	2.59289	2.57783	2.6034	2.40781	-1.82867	1.38253	-1.40834	2.79076	2.73109	2.71381	2.79	2.64268	-0.348382	2.71985	2.71912	2.66312	2.7711	2.74913	2.57326	-1.72791	-0.831605	-0.110614	2.09601	6.40087
ECD_02771	putative inner membrane protein	-0.181491	-1.58243	-1.67717	-1.63971	-1.62162	-1.65011	-1.62877	-1.65753	-1.78704	-0.584538	-1.92618	-1.9172	-1.96852	-1.84945	-1.88886	-1.83775	-1.86647	0.341293	-1.62628	-1.62806	-1.62301	-1.15266	-1.71784	-1.6278	-1.70293	-1.67786	-1.6573	-0.983555	-0.164314	-0.0155997	0.0159083	-1.86373	-1.92448	-2.01283	-1.93041	-1.41766	-0.153807	-1.90204	-1.89918	-1.94982	-1.8587	-1.35724	-2.08048	0.098347	1.16679	-0.00338756	-1.8517	-0.452148
ECD_00188	UPF0253 family protein	0.502561	0.206873	0.16907	0.183044	-0.479709	0.184842	6.35329	0.137377	-0.0314702	-0.385875	-0.212796	-0.200429	-0.265339	-0.128708	-0.129114	-0.117205	-0.118812	0.135298	-0.0502938	-0.0440509	-0.0459751	-0.03539	0.581722	-0.0569577	-0.0961812	-0.10178	-0.0691565	0.269559	0.137169	-0.412439	0.447106	-0.294457	-0.326475	-0.366971	0.308672	-0.49949	0.35161	-0.296677	-0.359048	1.18773	-0.253603	-0.38413	1.66507	-0.0974956	0.36312	0.0146149	0.151113	0.454024
ECD_01399	putative ABC transporter permease	0.373908	1.13982	1.11054	1.56967	1.33802	1.11978	1.61164	1.06924	1.03785	0.89081	1.54561	1.54773	1.50313	1.57977	1.56992	1.57101	1.61199	0.862916	1.49246	1.4818	1.49282	1.49664	1.45742	1.48121	1.52047	1.48283	1.52858	2.6021	-0.730666	1.09316	0.682909	1.62406	1.52158	1.53733	1.63048	1.75885	0.0193517	1.51416	1.53619	1.52049	1.59714	1.54991	1.50867	-0.978406	0.0453536	-0.754693	1.23901	0.599787
ECD_01081	uncharacterized protein	-0.0242397	0.0034638	-0.0598789	-0.0588109	1.65747	-0.0473308	-0.000495804	-0.0914196	0.540875	0.167643	-0.488298	-0.48228	-0.514894	-0.469102	-0.472764	-0.447318	-0.465231	-0.0922421	-0.500524	-0.518542	-0.493996	-0.496469	-0.604695	-0.520848	-0.521575	-0.537343	-0.502584	-0.0674701	0.201168	-0.15054	0.112291	-0.39973	-0.449259	-0.400163	-0.384297	-0.387746	-0.590753	-0.445087	-0.409673	-0.385666	-0.432686	-0.417527	-0.452708	0.984514	2.10919	0.555542	-0.281107	2.08329
ECD_01302	L-Ala-D/L-Glu epimerase	-0.109951	6.22946	1.04404	1.41278	1.45954	1.05643	1.08879	1.01717	0.960825	-0.283726	0.677633	0.680207	0.640152	0.70661	0.698617	0.704724	0.732347	-0.511583	0.549235	0.539552	0.557201	0.563823	0.517586	0.545632	0.561486	0.534049	0.566465	0.480388	-0.4057	0.63828	-0.346396	0.488077	0.413208	0.440879	0.459847	0.372044	-0.20441	0.410191	0.457695	0.471878	0.467414	0.434256	0.374897	0.490794	3.2897	0.612305	1.44782	1.98653
ECD_00353	S-adenosylmethionine:tRNA ribosyltransferase-isomerase	-0.814314	-0.401939	-0.487859	-0.426256	-0.554564	-0.415124	-0.402107	-0.475633	-0.0808329	-0.0251873	0.123803	0.0817635	0.0774025	0.155819	0.159302	0.185657	0.172815	-0.346081	0.0141432	0.0302283	0.019698	0.0415761	-0.0571159	0.00808289	0.00867816	-0.0101806	0.0111736	-0.268714	-0.732187	0.431441	-0.0689486	-0.294869	-0.330532	-0.407282	-0.341198	-0.503835	-0.119946	-0.315116	-0.366227	0.0727293	-0.262664	-0.351742	-0.531493	-0.360478	0.110971	-0.161039	-0.289586	1.3403
ECD_01125	peptidase T	-0.119985	0.664282	0.590913	0.596077	0.310406	0.612859	0.640099	0.567664	0.51916	-0.0761538	1.18972	1.20924	5.7701	1.2448	1.23433	1.23391	1.27301	-0.319485	0.78298	0.428739	0.440517	0.45401	0.3403	0.428042	0.436727	0.418206	0.437018	0.329061	-0.726682	-0.258591	0.179511	1.24184	0.699903	0.75631	0.770071	0.773806	0.128019	0.69834	0.728949	0.748714	0.732116	0.726489	1.04552	-1.34057	-0.649606	0.191187	1.00954	0.213752
ECD_02234	histidine ABC transporter periplasmic binding protein	-0.000153994	0.0727345	-0.00760752	0.0473053	-0.433063	0.0492547	0.0625744	-0.0159021	-0.0938092	0.209416	-0.375975	-0.372168	-0.427757	-0.352568	-0.338986	-0.31221	-0.3222	0.201041	-0.386634	-0.391067	-0.377436	-0.367391	-0.436397	-0.4017	-0.389246	-0.407491	-0.372531	-0.541003	-0.273812	-0.00160418	-0.142536	-0.434274	-0.470498	-0.459511	-0.425421	0.348002	-0.310966	-0.423668	-0.455218	-0.469481	-0.436753	-0.451475	-0.551096	0.378449	-2.44729	-0.66326	-0.166394	-0.113931
ECD_00067	DedA family inner membrane protein	-0.0285986	-0.561824	-0.602192	-0.582969	-0.456323	-0.587963	-0.569546	-0.623892	0.0781678	0.120573	-0.19038	-0.177787	-0.240494	-0.10915	-0.108595	-0.0931334	-0.102886	-0.11861	-0.554459	-0.546082	-0.548228	-0.536652	-0.649099	-0.559248	-0.604377	-0.607429	-0.575311	0.531502	-0.063544	0.796399	0.0906394	-0.214291	-0.24482	-0.286822	-0.258314	-0.41928	0.26852	-0.213958	-0.274961	-0.297961	-0.173053	-0.303434	-0.0051354	-0.0434005	1.20202	-1.00664	-0.427076	0.120159
ECD_01635	autotransporter adhesin-related protein	-0.437278	-0.46289	-0.482394	-0.449896	0.0389875	-0.493105	-0.460038	-0.546651	-0.575138	0.328954	0.0536712	0.648477	0.0427908	0.0832459	0.0805976	0.10439	0.102235	-0.0727526	-0.692887	-0.653268	-0.643995	-0.667654	-0.70505	-0.66349	-0.71055	-0.672199	-0.672059	-0.798974	-0.251006	0.318842	-0.0814588	-0.634251	-0.682783	-0.683732	-0.0684951	0.946639	-0.434185	-0.667227	-0.637192	-0.672242	-0.649614	-0.688747	-0.758707	0.471468	-0.987089	-0.579761	-0.0406011	-0.753323
ECD_04156	ferric citrate ABC transporter periplasmic binding protein	0.333174	6.13804	0.623756	0.660681	0.459671	0.647606	0.652857	1.12897	1.26165	-0.0292306	0.297328	0.288943	0.185423	0.381355	0.413296	0.391232	0.440931	0.00810085	0.723837	0.715245	0.714545	0.726925	0.59588	0.707417	0.700004	0.682954	0.687404	0.85417	0.377366	-0.241854	0.0565403	0.540623	0.609352	0.333732	0.435422	0.899987	0.147502	0.521363	0.41276	0.38418	0.571992	0.475285	0.542484	0.797252	-3.27133	-0.0385214	0.920099	1.00035
ECD_02051	hypothetical protein	-0.164333	0.290962	0.229891	0.259159	3.60188	0.275285	3.91079	0.229124	0.13159	0.0984159	0.527726	0.516971	0.475979	0.545329	0.538292	0.563468	0.553114	0.075603	0.37313	0.361669	0.514695	0.355839	0.30895	0.362301	0.366025	0.357776	0.355323	0.649159	-0.0977263	-0.151093	-0.282244	-0.00271494	-0.0304732	-0.0398089	0.00048279	-0.0533176	0.00238398	0.0113123	0.24651	-0.0538791	0.0511452	-0.0389631	0.693452	-1.66624	0.0164994	0.0968933	0.558064	0.696678
ECD_01137	repressor of blue light-responsive genes	-0.256216	-0.468789	-0.534339	-0.529527	-0.811597	-0.511037	-0.467326	-0.531766	-0.590847	0.373738	-1.20962	-1.18149	-1.20562	-1.16718	-1.16996	-1.14988	-1.17361	0.203377	-0.654307	-0.672133	-0.646826	-0.644748	-0.0270141	-0.658451	-0.685725	-0.676983	-0.675407	-0.770957	-0.196021	1.02441	0.208274	-1.07618	-1.11811	-1.06522	-1.07621	-1.05213	-0.474616	-1.1216	-1.0675	-1.04929	-1.08439	-1.09153	-0.0596334	0.650479	2.28516	-0.13346	-0.183614	-0.966168
ECD_03089	stringent starvation protein A, phage P1 late gene activator, RNAP-associated acid-resistance protein, inactive glutathione S-transferase-like protein	-0.606642	0.0854489	0.339191	-0.179093	-0.746204	-0.188405	0.0367109	-0.273141	-0.0441591	-0.164347	-0.0747757	-0.105389	-0.172163	-0.0353647	-0.0452084	0.0025064	-0.0156501	-0.087364	0.0185253	0.00279715	0.00612933	0.0156467	0.237873	0.000905787	-0.0436898	-0.0249391	0.332498	0.414415	0.0533654	-0.342036	0.242997	0.130589	0.162589	0.345557	0.291976	-0.138988	0.114643	0.110447	0.106918	0.297322	0.160582	0.0704314	-0.0984319	1.06346	2.10648	0.038432	1.12324	6.12241
ECD_03950	Sel1 family TPR-like repeat protein	0.176542	0.264452	0.194098	0.276098	-0.580015	0.17489	0.202881	0.137659	0.031038	-0.117055	0.0752802	0.0646191	0.325927	0.140125	0.14559	0.143709	0.133863	-0.48154	0.114651	0.0938956	0.101327	0.111039	-0.0585677	0.0800736	0.058369	0.520991	0.0323718	-0.156446	-0.149802	0.155498	-0.344532	0.420639	0.00166674	0.191197	-0.0409217	-0.30417	0.0705423	0.455709	0.35649	0.691252	0.235662	-0.00620333	0.589729	0.203813	-0.287838	-0.0822591	1.47256	0.288066
ECD_01573	DUF1471 family periplasmic protein	-0.217301	-1.0689	-1.09412	-1.02529	-0.724634	-1.09674	-1.04581	-1.12176	-1.14521	-0.0544174	-1.18259	6.11576	-1.19363	-1.16922	-1.15657	-1.13085	-1.17751	0.232947	-0.955405	-0.931432	-0.922289	-0.928872	-1.03228	-0.941763	-0.96205	-0.976864	-0.949837	-0.674287	0.435248	0.1708	0.212196	-0.498512	-1.62003	-1.59444	-1.57548	-0.944959	-0.00713763	-1.56837	-1.57385	-0.820097	-1.54272	-1.61201	-1.62346	0.814291	1.40573	-2.09919	-0.935275	-0.0830449
ECD_t00083	tRNA-Leu	0.344432	-0.363893	-0.444805	-0.411797	-1.17328	-0.423025	-0.397986	-0.48659	0.286706	0.0221632	-0.786217	-0.798459	-0.889154	-0.718863	-0.685085	-0.69088	-0.665357	-0.0653179	-0.915535	-0.915754	-0.910599	-0.891382	-0.999407	1.39311	-0.934023	-0.954991	-0.938936	-1.32822	-0.525647	-0.278547	-0.307714	-1.16421	-1.18969	-1.33032	-1.2524	-0.431473	-0.624274	-1.18167	-1.25485	0.74092	-1.13137	-0.170825	-1.36717	-0.0565907	1.30211	-0.939406	-0.840039	1.25906
ECD_03875	endonuclease V; deoxyinosine 3	-0.0919456	0.382017	0.513931	0.35173	0.221102	0.314716	0.279248	0.279352	0.120319	-0.21185	0.527676	1.09594	0.911136	0.58933	0.592993	0.592217	0.603303	0.141706	0.730856	0.701604	0.707014	0.690725	0.499149	0.711633	0.620845	1.03587	0.592105	0.76734	0.0388761	-0.0779797	-0.025428	0.192228	0.737042	0.158041	1.00476	-0.195017	-0.188115	0.787842	0.0720475	0.545896	0.278053	0.134436	0.534537	-0.735384	-0.188696	0.114177	0.581786	-1.26266
ECD_01650	component of SufBCD Fe-S cluster assembly scaffold	-0.154806	0.451835	0.446975	0.487783	0.597638	0.433545	0.469275	0.385976	0.353524	-1.01778	0.133417	0.151919	0.119228	0.16689	0.162931	0.18188	0.190838	0.18039	0.8488	0.878083	0.888566	0.860163	0.815029	0.869117	0.850873	0.876783	0.879576	0.745327	-1.3189	0.142857	0.320645	0.969178	0.911392	0.923278	0.965515	0.894607	-0.0630327	0.920041	0.943308	0.907886	0.95142	1.28701	0.842488	1.48196	-0.942783	0.339622	0.00975803	-0.278002
ECD_03286	UPF0056 family inner membrane protein	-0.0843374	-0.800835	-0.636645	-0.814127	0.155579	-0.834846	-0.316943	0.273613	-1.09932	-0.346619	-0.970592	6.01398	-1.0851	-0.863758	-0.867904	-0.836112	-0.860121	-0.19245	-0.881488	-0.885157	-0.875849	-0.881194	-1.06589	-0.902949	-0.79151	-0.949366	-0.280729	-0.0492413	0.0636559	-0.00756068	0.139913	-0.336633	-0.265269	-0.41033	-0.456606	-0.237665	-0.100266	-0.88949	-0.988238	-0.278804	-0.791998	-0.918783	-0.263351	-0.107055	-0.293461	-0.381945	-1.0147	-0.137878
ECD_00162	UPF0325 family protein	0.0106112	0.614823	0.577954	0.589929	1.1091	0.594293	0.592773	0.54266	0.373898	-0.19851	0.292269	0.304604	0.934729	0.37667	0.376134	0.387562	0.38697	-0.296804	0.3036	0.308739	0.783415	0.317012	0.478984	0.295967	0.259792	0.252885	0.285779	0.688735	-0.386273	0.0309778	0.263679	0.560126	0.525107	1.00838	0.520872	1.82116	-0.0141345	1.37893	0.487932	0.464472	0.600206	1.10482	0.839532	-0.233911	-0.79562	-0.133317	6.01155	0.246166
ECD_00417	DUF2496 family protein	-0.136301	0.149833	-0.422515	-0.380479	-0.662861	-0.387321	-0.0510991	-0.421386	-0.493455	-0.348828	-0.417412	-0.456035	-0.456621	-0.390431	-0.382413	-0.365533	-0.362492	0.412541	0.00260503	-0.00335443	0.00641405	0.0222389	-0.0902048	0.000905787	0.0825452	-0.0291982	-0.0248064	-0.281382	0.70955	0.0853853	-0.236181	-0.423397	-0.463857	-0.478658	0.730894	-0.0763894	0.142452	0.504413	0.520799	-0.497439	-0.405092	-0.442966	0.0945635	0.906427	1.06782	0.300995	-0.783988	0.189164
ECD_03801	6-phosphofructokinase I	-1.15377	1.75119	1.65437	1.71919	0.80911	1.78017	1.63961	1.74335	1.4757	-1.21462	1.9339	1.94355	1.85151	2.04779	2.04687	2.03781	2.06491	-0.955601	1.96364	1.91956	1.95471	1.94104	1.84235	1.92101	1.86373	1.87264	1.86369	1.54005	-1.1176	-0.0338549	-0.601952	2.00068	1.87464	1.77466	1.88608	1.49388	-0.528906	1.8779	1.93039	1.85397	2.03262	1.8942	1.70192	-0.474781	-0.71374	0.135119	1.57753	5.99746
ECD_04388	putative membrane-bound BasS regulator	-0.45988	-1.68953	-1.77586	-1.71715	-0.307677	-1.75118	-1.71012	-1.79068	-1.8664	-0.0454823	-1.5004	0.213329	-1.6019	-1.44871	-1.44898	-1.42684	-1.45333	0.195927	-1.69315	-1.69551	-1.70289	-1.69728	0.226132	-1.73772	-1.73167	-1.75184	-0.617398	-2.1607	0.447244	0.0764613	0.546651	-1.99596	-1.98978	-2.16011	-0.108125	-2.23193	0.293462	-1.96702	-2.02112	-2.0357	-1.90226	-1.96433	-2.10055	0.866754	0.841205	-0.615949	-1.69995	0.361457
ECD_02765	transketolase 1, thiamine triphosphate-binding	-0.538002	3.82727	3.88563	3.80019	3.38893	3.80306	3.71079	3.69799	3.67843	-2.42664	2.23095	2.23281	2.16042	2.31957	2.28235	2.29215	2.34867	-1.24522	2.70319	2.67196	2.67622	2.6761	2.58018	2.68135	2.67171	2.66466	2.69008	2.39467	-1.6435	-0.207666	-2.23162	2.45836	2.22977	2.17514	2.34205	2.27685	-1.3897	2.32434	2.22741	2.17715	2.30358	2.23728	2.07945	-2.89739	0.106699	5.89916	2.64301	1.65094
ECD_00136	putative fimbrial-like adhesin protein	-1.43157	-0.78935	0.040794	-0.810115	-1.46081	-0.815946	-0.795871	-0.850577	-1.01906	0.0677535	-0.368016	-0.355301	-0.416801	-0.288261	-0.287186	-0.269826	-0.283917	-0.57599	-0.807721	-0.797377	-0.799724	-0.787233	-0.900047	-0.810781	-0.861359	-0.862061	-0.830404	-1.1069	-0.553946	0.359188	-0.316569	-0.52583	-0.555156	-0.598775	-0.571214	1.19761	0.0771975	-0.523397	-0.583491	-0.606429	-0.484281	-0.614749	5.89386	0.474628	2.17167	-2.50718	-0.597903	-0.16492
ECD_02405	ancillary SecYEG translocon subunit; putative anti-RcsB factor	-0.12275	-1.19846	-1.28563	5.89146	-1.74867	0.0561847	-1.23034	-1.29462	-1.35126	0.189874	-1.21078	-0.355826	-1.22693	-1.17737	-1.16188	-1.15242	-1.14883	-0.0565953	-1.70765	-1.70526	-1.70561	-1.67676	-0.641224	-1.72066	-1.75152	-1.74321	-1.71199	-1.10273	-0.435142	-0.0231347	-0.100093	-1.2645	-1.29867	-1.31693	0.0375286	-1.38954	0.144499	-1.28504	-1.27303	-1.33019	-1.26983	-1.36409	0.145757	0.585118	1.85927	-0.399067	-1.1552	0.0436681
ECD_00967	methylglyoxal synthase	-0.276648	-0.607367	-0.677901	0.533876	-0.989884	-0.632207	0.16	-0.69131	-0.755612	0.183828	5.88081	-0.615666	-0.661682	-0.580914	-0.588139	-0.564375	-0.601698	0.55393	0.117169	0.0882068	0.122522	0.137706	0.0243901	0.110881	0.0878864	0.0988681	0.119048	-0.0563792	0.275426	0.0385574	-0.2469	-0.659431	-0.70641	-0.747755	-0.636446	-0.732584	0.142111	-0.704298	-0.721018	-0.715338	-0.691296	-0.688118	-0.123186	-0.964731	-1.71183	-0.863432	0.661472	-0.780503
ECD_01726	molybdopterin synthase sulfurtransferase	-0.157328	0.148462	0.112447	0.141982	-0.15378	0.13853	0.140569	0.0509148	0.0122764	0.50771	-0.138681	-0.136057	-0.161526	-0.121917	-0.124189	-0.0983242	-0.10927	-0.141485	0.179196	0.15252	0.185612	0.191366	0.142566	0.150138	0.133158	0.157649	0.160311	-0.0262165	0.0696646	0.242657	0.871236	0.499033	0.45963	0.475683	0.485504	0.392203	0.823923	0.468522	0.464457	0.415507	0.468764	0.456255	0.390507	-0.943679	-1.60685	0.268333	-0.516805	0.126065
ECD_04121	protein inhibitor of RNase E	0.0588174	0.971629	0.00553578	0.0449493	-0.871226	0.0279402	0.0662085	-0.0011314	0.698118	0.169147	-0.131476	-0.158678	-0.235896	-0.0423151	0.0110389	0.00492031	0.0257964	-0.157072	-0.103606	-0.119261	-0.126298	-0.109703	-0.244657	-0.124699	0.350846	-0.159814	-0.161534	0.599082	-0.600066	-0.150223	0.202347	0.575209	-0.394012	-0.56318	-0.4611	-0.663049	-0.503391	-0.379309	-0.436074	-0.497663	-0.314279	-0.414783	-0.625168	-0.217785	-0.0506363	-0.0455981	-0.177453	1.16437
ECD_02122	periplasmic thioredoxin of cytochrome c-type biogenesis	0.935729	-0.20561	-0.281455	-0.24586	-0.488825	-0.234872	-0.241614	-0.26891	-0.350475	0.525998	-0.417371	-0.454632	-0.48487	-0.404026	-0.40957	-0.378276	-0.384279	-0.375674	-0.738299	-0.752413	-0.73488	-0.76219	-0.774719	-0.753347	-0.73359	-0.763034	-0.709029	-0.830614	-0.00817959	-0.241574	-0.12459	-0.851143	-0.874508	-0.838621	-0.816624	-0.853661	-0.323665	-0.858091	-0.830651	-0.841272	-0.86109	-0.843481	-0.90079	-0.649434	-2.1169	0.593855	-0.412238	0.022272
ECD_03141	mechanosensitive channel protein, high conductance	-0.0187238	0.25092	1.14141	0.235004	0.441115	0.892274	0.215794	0.148041	0.0298776	0.175294	0.495182	0.461506	0.378106	0.531404	0.517225	0.553989	0.549062	-0.000178904	0.524582	0.505528	0.515251	0.51285	0.347819	0.512121	0.469563	0.474032	0.451393	0.460029	-0.132971	-0.540008	-0.349579	0.632479	0.141702	0.14607	0.421458	-0.134918	0.0160865	0.277694	0.102853	0.0292667	0.20597	0.151311	1.01357	-0.88782	0.274474	-1.14593	5.83947	-0.626687
ECD_00762	putative membrane fusion protein (MFP) component of efflux pump, membrane anchor	-0.0725238	-0.263776	0.292133	-0.161687	-0.0224343	-0.295455	-0.00911664	-0.0479126	-0.438995	0.188725	0.358405	0.329252	0.543701	0.397423	0.370182	0.373847	0.404835	-0.0225599	0.0313366	0.0237965	0.0223745	0.0294292	-0.0652505	0.0221732	0.0100316	0.00370822	0.0323718	-0.170197	-0.134067	0.143423	-0.222615	-0.346317	-0.351362	-0.397192	-0.308247	-0.261963	-0.0817243	-0.339326	-0.368222	-0.382613	-0.318913	-0.270425	-0.205475	-0.267955	-1.4525	-0.622885	-0.0727151	-0.486988
ECD_03868	immediate sulfur donor in thiazole formation	-0.123887	0.0428262	5.82498	0.0257819	0.240059	-0.0217972	0.624261	0.595708	-0.19564	-0.0106864	0.0453569	0.0453294	-0.03049	0.156693	0.151132	0.114778	0.828887	-0.0972654	0.0123412	-0.00571759	0.0124659	0.00377251	-0.194606	0.000905787	-0.0967226	-0.0804188	-0.123738	0.0557963	0.0481922	0.254702	0.249341	0.171652	0.148016	0.94156	0.0398078	0.618908	0.522289	0.162795	0.0315048	0.0042145	0.246364	0.114619	-0.0529473	0.0843083	-2.42566	0.9328	-0.167971	0.124297
ECD_00100	dGTP-preferring nucleoside triphosphate pyrophosphohydrolase	-0.421304	-0.665312	-0.705884	-0.686205	-0.286198	-0.691777	1.76071	-0.726783	-0.895166	-0.407477	-0.622159	-0.609507	-0.671618	-0.5416	-0.540793	4.89489	-0.53624	-0.194988	-0.704477	-0.694971	-0.697226	-0.685122	-0.223184	-0.708273	-0.756519	-0.758228	-0.726366	-0.687173	-0.194363	-0.170017	-0.220909	-0.907679	-0.93696	-0.980748	-0.110129	-1.11341	-0.411471	-0.403496	1.32074	-0.988226	-0.866119	-0.996646	-0.142003	-0.794251	-1.0589	2.1965	-0.793166	2.53583
ECD_01122	spermidine/putrescine ABC transporter permease	0.420855	0.545695	0.471922	0.477949	1.18882	0.493625	0.523178	0.450249	0.401728	0.323789	0.133941	0.161502	0.12107	0.183981	0.177227	0.194198	0.19286	0.514661	0.088638	0.081163	0.0926897	0.107411	-0.00379284	0.0801488	0.0816157	0.0661996	0.479623	-0.0122795	-0.0979499	-0.709796	-0.56578	-0.0443645	-0.0896287	-0.0334248	-0.040598	-0.0183112	0.09513	-0.095617	-0.0500799	-0.0259442	-0.0534362	-0.0791841	-0.100451	0.426574	-1.15952	0.458854	0.456985	-0.342673
ECD_01487	phage N15 gp48-like protein	0.172794	0.62765	-0.00060343	0.0397355	0.522594	0.31697	0.00885827	-0.0691524	0.868595	0.453979	-0.0996191	-0.33723	-0.359208	-0.318897	-0.313328	-0.294251	-0.316086	0.368805	-0.429916	-0.434006	-0.424491	-0.408031	-0.520822	-0.436045	-0.446744	-0.449045	-0.421175	-0.545754	-0.0223077	0.217514	0.116945	-0.561926	-0.626825	-0.637796	-0.612738	0.299765	0.326453	-0.614757	-0.272971	-0.381848	-0.597978	-0.653904	-0.386674	2.20905	-0.00154239	-0.57466	-0.610747	-0.308694
ECD_00152	iron(3+)-hydroxamate import ABC transporter permease	0.0390369	1.08838	1.05241	1.06244	0.39391	1.06928	1.47028	1.01353	0.844829	0.251903	1.64637	1.36354	1.29222	1.44358	1.44041	1.44233	1.46353	0.164176	1.15973	1.16097	1.15966	1.16796	1.05724	1.14867	1.12338	1.11178	1.14573	0.954251	0.0725307	0.00210732	-0.0349289	0.823971	0.788096	1.1611	0.9496	1.29081	-0.294303	0.815029	0.74972	0.726268	0.863829	0.733547	0.574215	0.251451	-0.781761	-0.718872	1.5058	-0.295268
ECD_00276	putative NAD(P)-binding succinyl-CoA synthase	0.168325	0.533764	0.489479	0.53037	0.480262	0.510861	0.516682	0.460631	0.321991	-0.321794	0.627282	0.611198	0.570536	0.68366	0.691822	0.706153	0.723841	0.134492	0.892536	0.902183	0.879347	0.894999	1.06868	0.882589	0.875721	0.858162	0.869152	1.51811	-0.171948	0.112619	-0.184048	0.82902	0.749048	1.03559	0.777081	1.14805	0.243058	0.791975	0.742271	0.685701	0.829787	0.728871	0.818168	-0.234051	-0.0924523	0.177038	0.732132	-0.523109
ECD_00441	iron export ABC transporter ATPase; peroxide resistance protein	0.0863522	-0.712832	-0.778308	-0.730598	-0.217504	0.677207	-0.716805	-0.768054	-0.840876	0.107476	-0.785599	0.160294	-0.842445	-0.761759	-0.745154	-0.732729	-0.737707	0.210853	-0.552394	-0.561491	-0.551991	-0.535352	-0.636281	-0.554933	-0.617166	-0.590486	-0.582901	-0.854055	-0.445259	0.167759	0.287191	-1.19126	-1.22387	-0.424163	-1.23329	0.0386795	-0.511131	-1.21501	-1.21144	-1.24363	-1.19408	-1.21014	-0.59337	-0.199082	-3.398	-0.128983	-0.708931	0.50755
ECD_04309	uncharacterized protein	0.393495	-0.697405	-0.759341	-0.751059	-0.878856	-0.736572	-0.690628	-0.755504	-0.804827	-0.716339	-1.26343	-1.25436	-1.27965	-1.2599	-1.25672	-1.22767	-1.25381	0.547833	-1.09567	-1.09547	-1.06232	-1.05781	-1.15089	-1.08074	-1.09372	-1.12161	-1.08815	-1.15294	-0.160747	0.476415	-0.018031	-0.858323	-0.902072	-0.856541	-0.8466	-0.857513	0.446686	-0.880519	-0.823181	-0.796756	-0.861887	-0.851327	-0.858998	-0.085526	2.09149	-0.538867	-0.92578	0.382082
ECD_01400	putative ABC transporter permease	0.438029	0.22205	5.73055	0.219739	2.03126	0.201331	0.231094	0.158904	0.127037	-1.56097	0.866094	0.432981	0.393139	0.450324	0.446365	0.459003	0.473929	0.772299	0.241787	0.239719	0.249685	0.259642	1.20343	0.238158	0.25489	0.224968	0.268106	0.789903	-0.00817119	-0.0804156	0.479237	0.653542	0.234362	0.256812	0.305111	0.130779	-0.0431159	0.228304	0.282427	0.95932	0.284916	0.258397	0.21429	-1.44423	-1.45113	-0.43042	-0.382766	-0.282303
ECD_00481	putative periplasmic pilus chaperone	0.316719	-0.373074	-0.434742	-0.408552	-0.839367	-0.423042	-0.396913	-0.449803	-0.498572	-0.920753	-0.754124	1.0135	-0.797818	-0.730524	-0.733172	-0.704017	-0.711583	0.123792	-0.0249015	-0.0363368	-0.0088272	-0.01049	-0.0949883	0.856412	-0.0653127	-0.0446702	0.00141471	-0.237938	0.103643	0.636411	0.238536	-0.383653	-0.38504	-0.386083	-0.382119	-0.409494	-0.112576	-0.355916	-0.358702	-0.366613	-0.352578	-0.348262	-0.484022	-0.101022	-2.82207	-0.786233	-0.52913	0.992756
ECD_t00011	tRNA-Gln	-1.03594	-2.14791	-2.21116	-2.18441	-2.56068	-2.18019	-2.15189	-2.21979	-2.28171	-1.04335	-2.35093	-2.36186	-2.40192	-2.30596	-2.30264	-2.27339	-2.28567	-0.486615	-2.19824	-2.21531	-2.20849	-2.18504	-0.923423	-2.20714	-2.25257	-2.22399	-2.25045	-1.20712	-0.128705	0.509585	-0.191879	-2.32977	-2.33325	-2.35175	-2.29598	-1.03808	-0.435522	-2.31734	-2.27624	-2.33951	-2.29849	-2.32173	-2.42367	0.403674	2.35942	-2.7744	-2.05731	-1.6174
ECD_02251	Elongation Factor P Lys34 hydroxylase	-0.290016	-0.0870104	-0.165502	-0.115387	-0.620063	-0.134108	-0.100289	-0.178202	0.753589	-0.275994	-0.0733014	-0.0695699	-0.119418	-0.0310912	-0.0333923	-0.0109243	-0.0123825	0.318401	-0.317789	-0.32649	-0.300348	-0.300233	-0.373009	-0.331781	-0.323334	-0.342811	-0.300605	-0.0595492	-0.39352	-0.345099	0.112328	-0.683326	-0.706509	-0.715455	-0.685587	-0.727985	-0.00737967	-0.675291	-0.712663	-0.72075	-0.690225	-0.70041	-0.256692	0.776781	0.877459	-0.189703	0.338597	-0.548167
ECD_00165	uridylyltransferase	-0.347255	2.93954	2.91153	2.90469	2.20814	2.9332	2.88092	3.01324	2.67294	-2.18188	2.43196	2.4423	2.35753	2.54114	2.53185	2.51203	2.58479	-0.154751	3.04018	3.02475	3.02536	3.02602	2.91918	3.01448	3.0359	3.00404	3.04224	2.78584	-1.58251	-0.387823	-1.88745	2.46056	2.41424	2.39289	2.43423	2.26209	-0.575501	2.43342	2.36027	2.33627	2.49771	2.36817	2.20165	-2.40173	-1.33815	-0.0397265	2.36316	1.19269
ECD_00547	toxic polypeptide, small	-0.372968	-0.237095	-0.288393	5.65456	0.138796	-0.265553	-0.242253	-0.289279	-0.413824	-0.427568	0.417796	0.394548	0.354953	0.447604	0.451364	0.459356	0.479111	-0.37596	0.128017	0.117365	0.133799	0.119184	0.0374805	0.105983	0.0867906	0.10419	0.134522	0.265164	0.388044	0.0445775	0.100811	-0.174173	-0.226736	-0.226044	-0.19645	0.857688	0.116871	-0.188582	-0.187273	-0.204872	-0.130308	-0.171905	0.40196	0.095943	-0.972447	0.00289066	0.05415	0.685439
ECD_01821	KHG/KDPG aldolase; 2-dehydro-3-deoxy-phosphogluconate/4-hydroxy-2- oxoglutarate aldolase	-1.95436	0.181282	0.139984	0.186498	0.0389875	0.178125	0.157421	0.108567	0.112095	-0.428099	0.755706	0.746886	0.691364	0.778437	0.786923	0.780655	0.852188	-0.967254	0.147311	0.114968	0.141939	0.153856	0.163647	0.130362	0.15105	0.138787	0.170472	0.0439525	-0.432826	0.137145	0.463569	1.04161	0.968895	1.12509	1.13838	1.09336	-0.478259	0.949202	0.953051	0.949402	1.01367	1.03246	1.01966	-0.321566	-0.97135	-1.2451	0.196908	5.64599
ECD_00200	2,5-diketo-D-gluconate reductase B	0.436886	0.480691	0.437556	0.454384	0.714432	0.4588	0.45502	0.409406	0.242606	-0.28061	0.503061	0.512898	0.443128	0.59055	0.881122	0.595071	0.614129	-0.296627	0.405452	0.403449	0.41149	0.417691	0.324111	0.401311	0.386615	0.374482	0.380797	0.482417	-0.718115	-0.0997241	-0.662997	0.0777166	0.043586	0.0133496	0.0274754	-0.139994	-0.250378	0.0659887	0.0221465	-0.0121556	0.0963835	-0.00547561	0.244833	-0.722504	1.64707	0.414609	0.709484	0.939489
ECD_01922	bifunctional histidinal dehydrogenase/ histidinol dehydrogenase	-0.708092	-0.323147	-0.359241	-0.311914	-0.0383164	-0.32855	-0.32501	-0.374089	0.134955	-0.443829	0.0401088	0.041798	-0.0133435	0.0655966	0.0595108	0.0818434	0.0803388	0.186848	-0.195772	-0.234361	-0.224175	-0.199354	0.00562915	-0.21591	-0.216122	-0.220246	-0.20799	0.0965172	-0.0804224	-0.258151	-0.419525	-0.276035	-0.303085	-0.300514	-0.281562	-0.29967	-0.0418224	-0.28525	-0.017318	-0.315997	-0.288271	-0.326442	-0.410523	-0.337979	0.712512	-1.70445	0.0797974	-0.89733
ECD_00977	hydrogenase 1, b-type cytochrome subunit	0.143473	-0.753314	-0.505272	4.05438	-1.14523	-0.777962	-0.776792	5.62996	-0.908959	0.215492	-0.566062	-0.545075	-0.592609	-0.485465	-0.489856	-0.48952	-0.516936	-0.964539	-0.762805	-0.790424	-0.161395	-0.764217	-0.853883	-0.768167	-0.727468	-0.783219	-0.768077	-0.0964846	0.0943875	0.410202	-0.404061	-0.86894	-0.922957	-0.948941	-0.837887	-0.94949	0.203264	-0.940518	-0.957105	-0.958471	-0.914026	-0.900234	0.105957	0.349177	0.216631	-1.07913	-0.135962	-0.274842
ECD_00309	S-formylglutathione hydrolase	-0.0870719	3.01534	0.120101	0.178349	1.64791	0.151119	0.199461	0.299251	0.166911	0.272515	3.00366	0.166036	0.153341	0.269327	0.272261	0.286795	0.289546	0.193543	0.148913	0.148188	0.149594	0.170973	0.0669353	4.5874	3.69343	3.29873	4.85353	5.2063	0.137874	-0.0791835	0.144262	5.37335	5.19796	5.22553	5.24549	5.23037	-0.136905	0.552817	0.0421138	-0.0169398	0.116497	0.0293132	0.341298	0.0831567	0.622782	0.596737	1.67943	1.36495
ECD_03969	carbon-phosphorus lyase complex subunit, putative ATP transporter ATP-binding protein	-0.0204172	0.00553862	-0.086544	0.000621092	-0.225342	-0.074146	-0.0442191	-0.118193	-0.215815	0.102109	-0.0123212	0.31854	-0.545962	-0.367835	-0.366275	-0.374174	-0.388818	0.0112541	-0.340267	-0.348063	-0.356869	-0.348889	-0.50784	-0.361616	-0.394226	1.69322	-0.405163	-0.865629	-0.304051	-0.00739764	-0.0551521	0.418447	-0.418968	-0.139399	-0.439272	0.84125	0.0983534	-0.386124	5.57568	-0.496311	-0.321751	4.50727	-0.596684	0.495988	-1.3428	0.375469	0.743923	0.083448
ECD_01963	putative glycosyl transferase	0.365109	0.624628	0.560294	0.601025	1.05642	0.614804	0.588759	1.21684	0.473569	-0.273465	0.123749	0.117363	0.0797596	0.149485	0.143528	0.167547	0.146999	0.201724	0.205135	0.182112	0.205625	0.222741	0.499898	0.195193	0.192019	0.184582	0.21761	0.0474868	-1.13032	0.427151	-0.350118	0.497716	0.480657	0.454649	0.503757	0.635752	0.39427	0.494912	0.46013	0.464195	0.507454	0.439128	0.376149	-0.0192577	0.506615	-0.358077	-0.0286329	1.2627
ECD_01624	glutaredoxin-4	0.494308	-0.0399456	-0.0665107	-0.00355704	-0.317594	-0.0578347	-0.0325061	-0.0927936	-0.132001	0.140461	-0.0830331	-0.0789694	-0.0961128	-0.0535634	-0.057458	-0.0321863	-0.0433286	0.0852539	-0.81613	-0.806744	-0.797527	-0.790083	-0.841693	-0.809043	-0.832861	-0.83734	-0.784612	-0.911312	-0.231734	-0.253997	-0.232955	-0.692071	-0.774735	-0.758223	-0.744298	-0.801611	-0.134516	-0.724395	-0.729189	-0.765904	-0.714948	-0.803501	-0.801406	2.17112	-0.817855	-1.66803	0.225331	1.4088
ECD_02056	transcriptional activator of csgD and csgBA	0.0478466	0.975764	0.901848	0.943766	0.576631	0.967221	0.928558	0.89178	1.67904	-0.451352	0.880089	0.874678	0.832089	0.905087	0.897365	0.920063	0.915362	-0.369973	1.30756	1.28834	1.30218	1.30882	1.51407	1.28769	1.32118	1.29696	1.30442	1.10072	0.0101226	0.165776	0.668413	0.992217	0.961265	0.9545	1.00307	0.941727	0.434181	0.989859	0.931573	0.929596	1.04117	0.954113	0.842579	0.639711	1.70676	-0.138464	0.707929	-0.233055
ECD_01572	pyridine nucleotide transhydrogenase, alpha subunit	-0.365114	0.997258	0.97653	1.03575	0.701961	0.976594	1.0016	0.93126	0.908023	-0.744897	-0.000540936	0.00294653	-0.0188408	0.0208949	0.0307087	0.0460639	0.0230492	-0.278582	0.328336	0.336098	0.346164	0.344008	0.258767	0.334628	0.606211	0.312536	0.35594	0.223756	-0.660034	0.39516	-0.0943946	0.423898	0.321788	0.377386	0.98264	0.302343	0.432654	0.367777	0.356557	0.377637	0.83051	0.336211	1.01109	-0.857424	1.54444	-0.666778	0.0871145	-0.224966
ECD_02090	nucleoside permease	-0.202533	-0.075515	-0.15077	-0.11184	-0.525967	-0.0875348	-0.121978	-0.14861	-0.244508	0.244084	-0.334028	-0.341848	-0.370845	-0.311655	-0.312808	-0.290231	-0.304462	0.361716	0.454342	0.428347	0.450683	0.448503	0.376577	0.440588	0.446404	0.438904	0.462825	1.11924	0.954104	-0.571859	0.345431	-0.160661	-0.167641	-0.194524	-0.139468	0.327172	-0.542364	-0.153524	-0.180482	-0.20191	-0.147773	-0.179266	-0.29251	0.79833	-1.61237	-0.510026	0.31617	0.283628
ECD_03520	hypothetical protein	-0.100691	0.0496176	0.661385	0.340343	1.57372	-0.0135208	0.0419879	-0.0472432	0.187068	-0.099721	-0.0461808	-0.00535361	0.250069	0.215494	0.21533	0.217194	3.66086	-0.237599	0.0465752	0.0299978	0.0187509	0.0524487	0.244255	0.39145	0.337081	0.197002	-0.169148	0.667074	-0.133115	-0.190605	-0.170127	-0.188201	0.141047	0.73688	0.687086	0.421724	0.10325	-0.202511	-0.342573	-0.424652	-0.0994943	-0.193355	-0.40556	-0.275811	0.154768	0.105529	0.255661	-0.479177
ECD_00996	hybrid sensory histidine kinase in two-component regulatory system with TorR	0.160047	0.0653327	-0.0207341	5.48212	1.14282	0.0400634	0.0171185	-0.0408066	-0.081678	-0.145566	-0.254137	-0.242207	-0.27997	-0.217027	-0.221127	-0.213289	-0.210842	0.109275	-0.122217	-0.153028	-0.12438	-0.12769	-0.243312	-0.128889	-0.142415	-0.148471	-0.120992	-0.26809	0.0077855	-0.421233	0.18087	-0.225982	-0.289536	-0.036133	-0.010365	0.147776	-0.0478875	-0.311443	0.831815	-0.26303	-0.27091	-0.257819	0.369763	-0.0341161	0.85317	0.412304	0.0557154	0.94058
ECD_00318	taurine dioxygenase, 2-oxoglutarate-dependent	0.0520656	-0.178155	-0.00459862	-0.181423	0.139554	-0.211641	-0.170127	-0.254467	0.0754192	-0.0709038	0.131433	5.48176	0.866103	4.02129	-0.0349218	-0.01098	-0.0282538	-0.00035889	-0.114535	-0.110898	-0.114914	-0.0890272	-0.203102	-0.119744	-0.118082	-0.0113791	-0.123979	-0.160506	0.352035	0.48554	0.238374	-0.121963	-0.177721	-0.232977	0.0476971	-0.322373	0.00326136	-0.159349	0.544583	-0.236558	-0.107155	-0.196332	1.15925	0.257312	-0.409673	-0.51613	-0.339057	0.932903
ECD_02281	acetyl-CoA:oxalate CoA-transferase	-0.218915	-0.121945	0.31865	0.165308	0.0861213	-0.166815	-0.139209	-0.20214	-0.299156	-0.568378	0.0338106	0.0534651	0.0978982	0.077317	0.0753562	0.0929386	0.0973895	0.188351	0.484282	0.472698	0.483025	0.491275	0.384368	0.463559	0.485097	0.449241	0.513431	0.421308	0.703849	-0.11469	0.306644	-0.161378	0.0117881	-0.228981	0.30458	-0.230975	0.147083	-0.234101	-0.252662	0.0657979	-0.228257	-0.236076	-0.212408	0.452766	0.918695	-0.246569	-0.326142	0.56227
ECD_04070	50S ribosomal subunit protein L9	-0.707159	2.35519	2.2459	2.32785	1.90625	2.3205	2.34415	2.24329	2.10533	-0.916489	2.72395	2.67392	2.60059	2.81991	2.82586	2.81344	2.8798	-0.770984	2.29467	2.30137	2.28446	2.25436	2.11087	2.266	2.25792	2.22525	2.22504	1.70321	-1.95168	0.640677	-0.701941	2.38149	2.35265	2.37942	2.29155	2.06924	-1.39218	2.34831	2.27963	2.21003	2.46409	2.37082	2.37565	0.134971	-0.000450363	-0.331418	2.35665	1.64205
ECD_00139	putative periplasmic pilin chaperone	0.423747	0.510226	0.471986	0.486715	1.45743	0.48749	0.493626	0.44193	0.273526	0.125216	0.0553763	0.067893	0.00443082	0.137527	0.13776	0.152038	0.144963	-0.144726	0.0949338	0.10211	0.100133	0.111166	-0.000883739	0.0890916	0.0473023	0.0428208	0.0752828	-0.203461	0.384584	0.135434	-0.167392	-0.145121	-0.17599	-0.217576	-0.188779	0.394738	-0.171645	-0.14538	-0.206663	-0.0336295	-0.103971	-0.234347	-0.389659	-0.935819	0.786075	-1.21867	5.45493	0.361054
ECD_00134	putative fimbrial-like adhesin protein	0.118574	5.0802	-0.412644	-0.39587	0.442157	-0.397672	5.45389	-0.439139	-0.607918	0.227094	0.295474	-0.04002	-0.77324	-0.644514	-0.643461	-0.626215	-0.640055	-0.589996	-0.611445	-0.602899	-0.605071	-0.593419	-0.705927	-0.616086	-0.661692	-0.664539	-0.632472	-0.0700703	-0.518935	-0.0363222	-0.339721	-0.339825	-0.370917	-0.412334	-0.383285	-0.0855551	0.017515	-0.340459	-0.401972	-0.425056	-0.298732	0.497035	0.635495	0.100302	0.0259685	0.297938	0.899109	0.278202
ECD_03884	GNAT-family putative N-acetyltransferase; acetyl coenzyme A-binding protein	0.0583492	0.656926	-0.0856155	-0.0179941	0.928363	-0.0592262	-0.0889944	-0.0949121	-0.237859	-0.0488592	-0.134571	-0.134425	-0.208848	-0.0474283	-0.053723	-0.0670632	-0.0709224	-0.059235	0.0540987	0.0343672	0.0444511	0.0144225	-0.176792	0.0433416	0.493905	-0.0531536	0.532759	0.30805	-0.41674	-0.124893	-0.252241	-0.135809	0.0611458	0.656017	0.843909	0.118407	-0.117038	-0.141551	-0.26314	0.431185	-0.0638764	0.825235	0.752329	-1.54017	0.683761	-0.386943	0.341369	-1.2086
ECD_01409	ATP-binding protein, periplasmic, function unknown	-0.483021	0.194282	0.173102	0.215485	-0.018751	0.177162	0.213767	0.137155	0.107656	-0.544238	-0.993671	-0.988461	-1.01668	-0.986916	-0.985506	-0.954517	-0.981766	-0.264035	0.120565	0.120669	0.130393	0.139138	0.0971779	0.118776	0.127891	0.103293	0.150317	0.0610092	0.447761	0.667469	-0.998477	-0.179828	-0.254046	-0.247252	-0.205803	-0.357109	-0.888807	-0.255877	-0.198591	-0.214734	-0.1993	-0.246751	-0.273233	-4.26631	2.1249	-0.507769	5.42568	1.65897
ECD_02190	2-succinyl-6-hydroxy-2, 4-cyclohexadiene-1-carboxylate synthase	-0.0497088	0.133098	0.352867	0.100027	0.267532	0.0852084	0.129718	0.0746995	-0.0380322	-0.174741	-0.168619	0.424924	0.167161	-0.134565	-0.139375	0.767884	-0.129864	0.100924	0.0157159	0.00824091	0.02221	-0.00144701	-0.0485433	-0.000598398	0.0119192	-0.0101806	0.0351042	0.143238	-0.463507	-0.271498	-0.270096	0.101055	0.219991	0.0642576	0.103418	0.0284375	0.150117	0.0934615	0.0148782	0.379391	0.0873707	0.212902	-0.0281773	0.0399804	-0.114039	-1.27476	-0.237555	-0.661514
ECD_00592	phospholipid:lipid A palmitoyltransferase	-0.632011	0.335473	0.257001	0.310212	0.942293	0.290037	0.290008	0.264573	0.149936	-1.00282	0.490467	0.481854	0.38992	0.564889	0.570966	0.568221	0.602539	-0.119814	0.969451	0.947283	0.935283	0.950774	0.833547	0.943952	0.932451	0.948131	1.39999	0.66069	0.275082	0.138945	0.0194293	0.463349	0.438343	0.420808	0.439432	0.358426	0.310914	0.456547	0.44656	0.397347	0.484045	0.405778	0.60486	-0.508828	2.33906	-1.13683	0.1326	1.12984
ECD_02135	ferredoxin-type protein, role in electron transfer to periplasmic nitrate reductase NapA	0.103597	-0.265145	-0.333438	-0.299405	-0.731268	-0.286608	-0.276196	-0.317666	-0.000674854	-0.0311659	-0.0209469	-0.0537967	-0.091522	-0.00119041	-0.00457768	0.0184113	0.0141375	-0.205949	-0.574236	-0.592522	-0.573608	0.172428	-0.640775	-0.588859	-0.582994	-0.599361	-0.5573	-0.758376	-0.123329	-0.667052	-0.208618	-0.174795	-0.198611	-0.175174	-0.170508	-0.22751	0.419239	-0.184833	-0.195473	-0.202572	-0.188055	-0.191182	-0.299	-0.132058	2.25195	-1.75194	-0.575611	-1.62799
ECD_04123	DUF898 family inner membrane protein	-0.0567858	0.625142	0.519627	0.547849	0.552702	0.543398	0.575903	0.498906	0.377713	-0.0409261	0.505925	0.486808	0.40562	0.597931	0.637385	0.623171	0.676637	-0.409381	0.0529782	0.0456747	0.0484139	0.0637146	-0.0438351	0.0377842	0.0394052	0.008782	0.0235284	-0.379276	-0.191862	-0.54548	0.111764	0.285764	0.256798	1.51464	0.214931	0.0624723	0.32774	0.267854	0.215515	0.174427	0.332145	0.259331	0.0876285	-0.0120279	0.770221	-0.510996	-0.0536899	0.323005
ECD_00833	Terminase, ATPase subunit	-0.121539	0.792381	0.721338	0.755268	0.640459	0.887217	0.773551	0.717707	0.648235	-0.293243	0.422945	0.410812	0.36341	0.448249	0.441004	0.459126	0.464675	0.161695	0.437345	0.427911	0.435885	0.4459	0.353941	0.647049	0.398453	0.420438	0.433861	0.252965	-0.807461	-0.0778458	0.112734	0.686542	0.568103	0.548391	0.650224	0.837726	-0.101258	0.568821	0.581986	0.626906	0.583645	0.602955	0.633269	0.529682	-0.0932432	-1.00268	0.500608	0.390328
ECD_00616	Hsp70 family chaperone Hsc62; RpoD-binding transcription inhibitor	-0.0956477	-0.219344	-0.281317	-0.240068	-0.78535	-0.251877	-0.241215	0.545217	1.56407	-0.119376	-0.0949743	-0.123041	-0.173818	-0.0233273	-0.0137058	-0.0104425	0.00617449	-0.112144	-0.0422532	-0.058054	-0.0571385	-0.0379028	-0.150805	-0.0600908	-0.0800904	-0.061633	0.118811	0.188036	-0.554243	0.0495823	0.0272503	-0.235268	-0.252675	-0.285841	-0.230535	0.0696275	-0.046946	-0.237749	-0.229252	0.145498	-0.20128	0.134792	0.218619	-0.0431623	-2.53232	0.150496	0.836758	1.40145
ECD_01291	putative TIM alpha/beta barrel enzyme	-0.158666	-0.105574	-0.163319	-0.147497	-0.260684	-0.145057	-0.0961747	-0.17258	-0.227221	0.437945	0.413252	0.416174	0.379469	0.437821	0.431372	0.442936	0.457566	-0.136314	-0.288975	-0.294423	-0.284616	-0.268709	0.29228	-0.296179	-0.287304	-0.307226	-0.325985	-0.410844	-0.0895252	-0.164333	0.395698	0.430225	0.373734	0.378619	0.398508	0.316233	0.123205	0.359947	0.406883	0.43059	0.41257	0.387777	0.743356	-0.212335	-1.34901	0.50768	-0.0993562	-0.557971
ECD_00331	PsiF family protein	-0.277275	0.00352836	-0.0630326	-0.0102998	0.533813	-0.0211815	0.00415101	-0.059568	-0.157737	0.44653	5.34707	0.226719	-0.148286	-0.0430872	-0.0209672	-0.00530421	-0.026563	-0.32397	0.0323392	0.0314428	0.0311568	0.0529941	-0.0540408	0.025265	0.0211027	-0.0101806	0.0213229	0.323047	0.0517665	-0.99928	0.191358	0.421223	0.0490883	-0.0130994	0.38458	0.538534	0.329107	0.0829962	0.361966	0.343959	0.136325	0.0420285	0.93665	-0.0763543	0.202571	-0.495362	0.159962	-0.0754396
ECD_01195	cation transport regulator	-0.0120118	-0.317566	-0.416569	-0.411836	-0.53407	-0.389983	-0.289317	-0.413837	-0.412282	-0.330636	-1.58995	-1.57193	-1.60745	-1.57986	-1.5838	-1.55552	-1.58339	0.701667	-0.56077	-0.568242	-0.547306	-0.539979	0.731396	-0.565233	-0.557304	-0.586795	-0.545921	-0.591256	0.558254	-1.04367	-0.486981	-0.648035	-0.690365	-0.667038	-0.642201	0.618687	-0.583988	-0.70353	-0.623369	-0.587161	-0.682932	-0.656709	-0.683698	0.494534	2.87971	0.479953	-0.527823	-0.947313
ECD_01681	integration host factor (IHF), DNA-binding protein, alpha subunit	-1.09868	0.612372	1.23536	0.641036	0.327096	0.638278	0.601329	0.543186	0.508847	0.131005	0.0682978	0.0826456	0.0541251	0.0940175	0.0945339	0.117834	0.112891	0.0416252	0.430686	0.426066	0.436061	0.448279	0.365215	0.420699	0.397094	0.418545	0.434687	0.2728	0.664056	0.890833	-0.644884	-0.109298	-0.128774	-0.176459	-0.152369	-0.222839	-0.670535	-0.156192	-0.121459	-0.166359	-0.108804	-0.195337	-0.211606	2.0193	2.83104	-1.33576	0.588257	2.60835
ECD_01775	acyl-CoA synthetase (long-chain-fatty-acid--CoA ligase)	-0.183747	1.43224	1.39992	1.41785	1.10895	1.43368	1.39871	1.33969	1.29657	0.503824	0.994522	0.969091	0.988139	1.02577	1.04611	1.05757	1.06372	0.242602	0.575022	0.566102	0.580569	0.5834	0.539149	0.561501	0.550839	0.559277	0.572733	0.459955	-0.267617	0.053445	0.475926	0.826969	0.780952	0.805819	0.825698	0.723584	-0.723058	0.7836	0.792913	0.731287	0.794921	0.784297	0.728142	-2.25163	-0.48364	-1.37654	0.805963	0.5719
ECD_01926	N-(5'-phospho-L-ribosyl-formimino)-5-amino-1- (5'-phosphoribosyl)-4-imidazolecarboxamide isomerase	0.548632	0.280339	0.236881	0.283736	-0.0416674	0.269773	0.267546	0.219718	0.165235	0.150992	0.388886	0.380711	0.340604	0.405181	0.398327	0.424865	0.424375	-0.413424	0.817533	0.771888	0.782838	0.804398	0.782958	0.791195	0.810572	0.797995	0.811968	0.669418	0.55985	-0.0684966	-0.413142	0.19503	0.164641	1.36854	0.192942	0.17183	0.230784	0.180047	0.149592	0.145978	0.181935	0.143621	0.0766883	0.940042	-1.8651	-0.706664	-0.114292	0.0802075
ECD_02354	malic enzyme: putative oxidoreductase/phosphotransacetylase	0.0158223	0.592111	0.508844	0.56906	0.572787	0.553636	0.542252	0.480121	0.672839	-0.0917065	0.438585	0.460829	0.369369	0.478425	0.502321	0.515016	0.528154	0.431619	0.984036	0.974807	0.970704	0.980643	0.884862	0.944504	0.953753	0.933386	0.988836	0.931161	0.136332	-0.263392	-0.110008	0.468594	0.435643	0.408063	0.639737	0.638947	0.160666	0.59237	0.453017	0.369492	0.47174	0.393908	0.656554	-0.51049	0.784418	-0.197668	0.618985	0.146516
ECD_00187	modulator of Rho-dependent transcription termination	-0.217355	5.30294	-0.0966261	-0.0807902	-0.600806	-0.0814313	0.0527644	-0.124618	-0.293012	0.190277	0.0310881	0.0434361	-0.0216784	0.115324	0.114834	0.126475	0.125475	-0.015571	-0.0292476	-0.0228642	-0.0247511	-0.0140799	-0.12595	-0.0357869	-0.0753399	-0.0807966	-0.0481322	0.577251	0.0204492	0.0592875	0.180987	-0.269316	-0.302759	0.262949	0.0470654	0.209771	0.114659	-0.0562045	0.246562	0.2256	-0.228831	0.0717225	0.139744	-0.0941987	0.457082	-0.734583	-0.367767	0.0117395
ECD_01799	putative transporter	0.0219019	-1.15069	-1.20142	-1.14737	0.552483	-1.15749	-1.16188	-0.591312	-0.624893	0.205637	-0.393474	-0.396157	-0.429366	-0.376698	-0.377085	-0.356282	-0.354457	0.242821	-0.704124	-0.719347	-0.657929	-0.719709	-0.145694	-0.721621	-0.749731	-0.688953	-0.695897	-0.361986	0.635438	0.269405	0.341539	-0.764422	-0.78668	5.29275	-0.768176	-0.836059	0.322359	-0.770617	-0.761448	-0.782417	-0.783094	-0.784572	-0.840509	0.689053	1.86035	0.735451	-0.657442	-1.04689
ECD_00673	UPF0271 family protein	-0.00124289	0.198167	0.167026	0.175464	0.297916	0.176012	0.200815	0.120366	0.0180685	0.906196	0.747476	0.71604	0.693067	0.782465	0.782582	0.788303	0.813423	-0.427447	0.077087	0.0567165	0.0513464	0.0486734	-0.0438528	0.0397951	-0.00902339	0.0244714	0.0323718	-0.17747	0.415867	0.580815	-0.27778	-0.397933	-0.389686	-0.42239	-0.380629	-0.422203	0.356003	-0.380094	-0.396263	-0.430093	-0.360747	-0.404854	-0.51453	-0.634398	-2.26601	-0.448101	-0.0942977	0.13965
ECD_02140	fused DNA-binding transcriptional dual regulator/O6-methylguanine-DNA methyltransferase	-0.121618	0.206376	0.676697	0.169352	0.338282	0.18185	0.722797	0.144559	0.0143073	-0.153454	0.429723	0.426697	0.359065	0.46389	0.460773	0.483601	0.471209	-0.0648181	0.366863	0.353945	0.3663	0.358818	0.297961	0.353732	0.36273	0.347069	0.389345	0.189951	-0.0184707	-0.201347	0.196349	0.0957993	0.0695083	0.555358	0.103604	0.0387541	0.297405	0.0849428	0.0718369	0.0779376	0.0918105	0.0789609	-0.00789312	0.538418	-1.59552	-0.2206	0.513773	1.36919
ECD_01021	deferrrochelatase, periplasmic	0.210382	-0.835026	-0.916339	-0.89325	-0.586984	-0.296648	-0.856289	-0.931694	-0.506097	0.307834	-0.768713	-0.761612	-0.796233	-0.755556	-0.760138	-0.731986	-0.750731	0.31667	-0.328732	-0.351184	-0.322859	-0.324509	0.305088	-0.334486	-0.357999	-0.34811	-0.325998	-0.455968	0.244113	0.0364938	0.0340296	-1.13439	-0.610417	-0.860242	-1.38434	-0.312936	-0.188584	-1.43357	-1.40027	-1.37895	-1.40843	-1.38468	-1.47758	-0.300179	-0.50369	-0.119392	-0.57631	-1.06085
ECD_01216	UPF0056 family inner membrane protein	-0.607086	-0.0468497	-0.106745	-0.0989839	0.974078	-0.0770092	0.00750801	-0.110882	-0.165643	-0.51819	-0.2563	-0.247011	-0.283834	-0.240406	-0.245202	-0.221836	-0.236796	-0.202281	0.0853539	0.0800366	0.089504	0.0952313	-0.029901	0.0834505	0.0679857	0.0551501	0.0819749	-0.0431787	-0.00396196	0.344788	-0.48118	-0.273016	-0.317905	-0.351427	-0.303952	-0.376765	-1.10536	-0.333324	-0.274784	-0.251252	-0.308201	-0.316306	-0.387119	-2.80381	1.79072	0.277066	0.275241	-0.415511
ECD_00947	putative fimbrial-like adhesin protein	-0.789345	-0.551903	-0.625893	-0.610526	-0.118835	-0.586482	-0.573154	-0.640255	-0.687332	0.180022	-0.528531	-0.509535	-0.561612	-0.481541	-0.50211	-0.489468	-0.485078	0.163554	-0.62979	-0.644	-0.627238	-0.618632	-0.746765	-0.638572	-0.672818	-0.646739	-0.653447	-0.815136	-0.516641	-0.236034	0.00761868	-0.560559	-0.60936	-0.627182	-0.529735	0.10711	0.284766	-0.599716	0.262759	-0.594132	-0.59567	-0.580202	-0.737113	0.157615	0.974626	0.0547702	-0.876356	-0.60911
ECD_02206	NADH:ubiquinone oxidoreductase, chain I	-0.61806	1.39347	1.31535	1.35559	1.41439	1.35294	1.36436	1.29274	1.18346	-0.40659	0.928086	0.934258	0.870752	0.963942	0.955431	0.970066	0.98875	-0.897349	0.490578	0.478718	0.506946	0.488166	0.41647	0.93569	0.490652	0.451118	0.492698	0.349918	-0.885922	0.0092655	-0.614155	0.0912956	0.0558456	0.0412349	0.0858914	0.0240495	-1.51299	0.0720705	0.0515494	0.0453674	0.063391	0.0763532	-0.050447	-1.97712	1.11377	0.309021	0.268285	-0.82114
ECD_00552	stimulator of EntF adenylation activity, MbtH-like	0.447976	0.146478	0.0978208	0.122124	-0.274094	0.122977	0.1388	0.0953741	0.000140179	0.577212	0.655379	0.624831	0.566528	0.67794	0.682864	0.684979	0.719908	-0.484783	-0.0116702	-0.0280357	0.0052181	-0.0124634	-0.0695841	-0.0394803	-0.0406074	-0.0358731	0.00153477	-0.203394	-1.4676	-1.88111	-0.669841	-0.57083	-0.618277	-0.574217	-0.582701	-0.591695	-0.878334	-0.597805	-0.580817	-0.569384	-0.555915	-0.563894	-0.673616	0.644809	0.827998	0.779003	-0.0845881	-1.0982
ECD_01801	carboxy-terminal protease for penicillin-binding protein 3	-0.0581397	0.130055	0.0788	0.321205	0.847065	0.377009	0.273888	0.243547	0.163386	0.0119342	-0.75639	-0.754919	-0.632024	-0.745253	-0.735	-0.706035	-0.730369	-0.491585	-1.34796	-1.34985	-1.33139	-1.32297	-1.37625	-1.35053	-1.39753	-1.3601	-1.24547	-1.14113	-0.0592678	-0.121807	-0.180673	-0.887017	-1.04528	-0.885197	-0.880095	-0.817945	-0.400317	-1.02921	-1.02235	-1.04502	-1.03281	-1.0343	-1.08581	2.10959	2.78523	-0.0189594	1.06121	0.602296
ECD_00901	putative isochorismatase family hydrolase	0.233169	-1.92898	-1.99516	-1.9777	-0.613574	-1.61863	-1.92647	-1.98925	-2.02245	0.140815	-2.07652	-2.06175	-2.11085	-2.06039	-2.06433	-2.04184	-2.05548	0.0693933	-2.369	-2.39444	-2.37798	-2.35454	-2.42872	-2.39647	-2.40966	-2.386	-2.38031	-2.47753	-0.0282816	-0.30257	-0.0485147	-1.9503	-1.99418	-1.97831	-1.67356	-1.92015	0.0244617	-1.9814	-0.919881	-1.50429	-1.98798	-1.96963	-2.02305	1.46534	-1.27854	-1.24798	-0.940516	-0.467377
ECD_01859	fused chemotactic sensory histidine kinase in two-component regulatory system with CheB and CheY: sensory histidine kinase/signal sensing protein	-0.0163075	0.204966	0.168908	0.209901	-0.0877296	0.193919	0.18676	0.143252	0.110643	-0.576221	0.746334	0.735978	0.686857	0.782646	0.778606	0.778782	0.831382	-0.829994	0.526523	0.511526	0.524594	0.54477	0.529967	0.517783	0.526697	0.509548	0.54352	0.356158	-0.784724	-0.434678	0.144173	0.723054	0.70311	0.801967	0.734162	0.63587	0.0126949	0.686345	0.688059	0.643329	0.711055	0.688106	0.597239	-1.22018	-0.898704	1.14672	0.727822	0.0511278
ECD_00242	moco insertion factor for PaoABC aldehyde oxidoreductase	0.497988	0.864046	2.14574	0.830574	0.173246	0.843584	0.833178	0.787728	0.620961	-0.441336	0.455038	0.463345	0.393191	0.517268	0.511163	0.528684	0.535895	-0.654603	0.841116	0.835337	0.84392	0.856017	0.748693	0.832331	0.809972	1.79935	0.796967	0.539335	0.19756	0.444506	0.908265	1.79656	0.793048	0.797092	0.821607	1.63966	0.177062	0.818923	0.776018	0.731214	0.865499	0.77739	0.552682	-0.115069	2.0081	-0.408059	0.973411	-0.625428
ECD_02920	DUF1449 family inner membrane protein	-0.285363	1.11247	1.006	1.06323	2.04733	1.0466	1.01461	1.02578	0.854452	0.150765	1.16809	1.17077	1.07416	1.23175	1.21082	1.21334	1.24001	-0.0159369	1.142	1.12725	1.13742	1.14036	0.975467	1.12589	1.1096	1.12133	1.10001	0.80887	0.444828	0.229143	-0.744412	1.01552	0.963906	1.17508	0.95486	0.758712	-0.36256	0.976031	0.929192	0.911276	1.00149	0.911602	1.20133	-1.39301	0.329179	0.553829	1.23697	0.725982
ECD_00438	copper-responsive regulon transcriptional regulator	0.253389	-0.225058	1.12494	-0.25478	-0.720134	-0.251583	-0.240152	-0.292594	-0.333024	-1.10539	-0.692983	-0.724732	-0.731176	-0.674221	-0.664571	-0.643043	-0.646937	0.0531231	-0.325513	-0.328957	-0.31267	-0.286357	-0.376843	-0.322447	-0.368867	-0.351763	-0.334293	-0.531968	0.164574	-0.500435	0.300944	-0.968017	-0.999398	-1.00012	-0.987233	0.256193	-0.68304	-0.991339	-0.968312	-0.988525	-0.97157	-0.970677	-1.0772	-1.38118	-3.27912	-1.03121	-0.910366	-1.99044
ECD_01744	putative MFS sugar transporter, membrane protein	-0.0539317	-0.6131	-0.653617	-0.629145	0.751673	-0.622158	-0.615712	-0.701114	-0.70943	-0.877184	-1.06068	-1.05868	-1.07557	-1.0605	-1.0639	-1.02803	-1.04394	-0.40256	-1.03547	-1.05671	-1.0174	-1.00613	-1.03115	-1.05972	-1.0704	-1.05348	-1.03842	-1.14001	0.400298	-0.506276	0.0981705	-0.627421	-0.667731	-0.603492	0.0199208	-0.660588	1.1119	-0.655158	5.09443	-0.656255	-0.658545	-0.641272	-0.629723	-1.32373	1.13088	-1.04862	-0.761474	-0.423129
ECD_00471	putative carbonate kinase	0.00524269	-0.0752177	-0.134452	-0.112925	-0.38386	-0.105895	-0.105879	-0.153676	-0.234117	-0.0229478	0.0247403	0.00993509	-0.0201795	0.0579087	0.0557867	0.0786975	0.0803388	-0.203712	-0.171762	-0.186901	-0.165638	-0.171018	-0.26912	-0.18897	-0.23045	-0.20237	-0.175037	-0.181428	-0.153567	0.17106	-0.10044	-0.0326211	0.202139	0.0735702	-0.0935758	0.307489	-0.176733	-0.0576087	-0.0671643	-0.0961718	-0.0492892	-0.0765155	0.0317993	-0.175677	-0.336405	0.624327	0.865408	-0.456575
ECD_04371	DUF2387 family putative metal-binding protein	0.322709	-0.115778	-1.01323	-0.999545	-1.8033	-0.98994	-0.998713	-1.09661	-0.276128	0.0498185	-0.92872	-0.940703	0.00617396	-0.885423	-0.890871	-0.843552	-0.868365	0.0197308	-0.823164	-0.821939	-0.806163	-0.805729	-0.980555	-0.818773	-0.871768	-0.849577	-0.910543	-1.22878	0.303372	0.158042	0.15343	-0.937513	-0.975587	-0.359643	0.123548	-1.21454	-0.324394	-0.174635	-1.00294	-1.02234	-0.860676	-0.943169	-1.11108	0.429793	-0.542864	-0.0222659	-1.25913	-0.893817
ECD_01281	regulatory protein for phage-shock-protein operon	-0.028107	-0.443499	-0.502787	-0.0483669	-0.392182	-0.501421	-0.416849	-0.531898	-0.576117	0.374513	-0.897507	-0.891945	-0.921084	-0.886522	-0.889252	-0.860236	-0.883394	0.477348	-0.781838	-0.783663	-0.749441	-0.756659	-0.874637	-0.761048	-0.797575	-0.802537	-0.787582	-0.92271	0.47532	0.0993782	0.462165	-0.705847	-0.741505	-0.748834	-0.704591	-0.349003	0.0482871	-0.728359	-0.694756	-0.673989	-0.708042	-0.711487	-0.806785	2.0464	1.53183	6.58117e-05	-1.04325	0.0875436
ECD_02136	ecotin, a serine protease inhibitor	0.141505	0.32329	0.256039	0.28776	-0.146499	0.303491	0.307846	0.267695	0.135654	-0.633662	-0.208088	-0.240738	-0.2765	-0.190833	-0.193383	-0.167256	-0.178628	0.0257086	-0.235857	-0.249976	-0.231367	-0.242813	-0.296931	-0.246807	-0.252802	-0.263898	-0.222697	-0.419102	-0.130422	-0.506541	-0.0456536	-0.155019	-0.178269	-0.155413	-0.151293	-0.20773	0.250617	-0.164084	-0.174204	-0.181218	-0.168134	-0.171209	-0.0708018	0.452137	2.74862	0.751471	0.208309	-0.851357
ECD_01913	D-alanyl-D-alanine carboxypeptidase; penicillin-binding protein 6b	0.250531	-0.183981	-0.220259	-0.178403	0.416769	-0.195803	-0.191676	-0.242291	-0.292985	0.315251	-0.188786	-0.185279	-0.235043	-0.167686	-0.172538	-0.145784	-0.155929	-0.333005	-0.18833	-0.228107	-0.217818	-0.193553	-0.211048	0.350525	-0.20644	-0.211987	-0.199477	-0.290141	-0.204263	-0.240739	0.06021	-0.259653	-0.296091	-0.0382917	-0.268559	0.371095	0.0794905	-0.278249	-0.302402	-0.312816	-0.243573	-0.314035	0.0809369	0.55279	1.15686	0.0028524	0.0380307	1.18113
ECD_03212	stationary phase-induced protein, putative toxin	0.00195977	0.499839	0.447436	0.478457	0.23098	0.480663	0.467596	0.362245	0.941171	-0.0559982	0.649183	0.644478	0.561079	0.73247	0.724414	0.761455	0.75885	-0.135529	0.691463	0.68188	0.688925	0.671988	0.475833	0.682839	0.628818	0.652972	0.857862	0.175238	-0.154282	0.290986	0.357611	1.59536	0.700382	0.728991	0.643198	0.540036	0.255658	0.706112	0.878552	0.829146	0.823504	0.892202	1.39292	0.252371	0.47119	1.71894	0.226505	-0.516853
ECD_02127	heme export ABC transporter permease	0.0873207	0.692067	0.622585	0.644476	0.205327	0.657574	0.651258	0.619295	0.519075	0.308267	0.793277	1.15246	0.255291	0.350802	0.354115	0.372916	0.367838	-0.278921	0.255019	0.241572	0.256795	0.25195	0.190674	0.243578	0.574487	0.231655	0.274689	0.316882	0.258177	-0.0267854	-0.375595	-0.00242325	-0.0280771	-0.00269026	0.00599749	-0.0550578	0.517967	-0.01562	-0.027901	-0.0352553	-0.0161564	-0.0194167	0.661105	-1.16156	-1.61444	-0.0538652	0.488258	0.422395
ECD_t00054	tRNA-Gly	-0.107203	-0.232621	-0.892807	-0.84292	-0.173406	-0.819962	-0.197284	-0.865253	-0.972849	-0.0270927	-0.703148	-0.323441	-0.785961	-0.659159	-0.675557	-0.643989	-0.652579	0.176949	-0.807322	-0.806343	-0.797357	-0.805579	-0.908124	-0.80209	-0.866694	-0.832748	-0.847317	0.358357	-0.0491246	0.353333	-0.112924	-1.07269	-1.06568	-0.977452	-1.45864	0.077642	-0.412458	-1.41441	-0.534455	-1.49727	-1.38198	-1.45091	-1.64404	0.594886	0.581234	-0.616478	-0.724204	-0.606545
ECD_00274	ankyrin repeat protein	0.405478	0.528062	0.485868	0.523735	-0.156246	0.506776	0.515526	0.460062	0.317061	-0.764156	-0.00479108	-0.0203652	-0.0560292	5.0362	0.0556531	0.0779481	0.0772621	-0.287297	0.413539	0.426349	0.403148	0.420253	0.343234	0.40637	0.390687	0.376935	0.387122	1.0644	-0.105395	0.366626	0.368438	0.330848	0.255816	0.267059	0.766471	0.120697	-0.40549	0.3007	0.25369	0.197371	0.334316	0.242013	1.02013	-0.00279265	0.386725	1.23574	0.583344	0.112531
ECD_00703	quinolinate synthase, subunit A	0.041453	-0.730808	-0.768689	-0.74422	-0.230312	-0.762295	-0.730104	-0.802493	-0.908323	-0.157586	-0.548516	-0.611038	-0.634276	-0.529521	-0.534723	-0.525118	-0.514669	-0.0596133	-0.569034	-0.58244	-0.577427	-0.571644	-0.705042	-0.584596	-0.643262	-0.616527	-0.617555	-0.126526	0.047564	-0.123587	-0.494844	-0.816103	-0.843141	-0.564062	-0.508161	-0.853043	-0.303803	-0.835303	-0.840306	-0.873674	-0.807827	-0.500233	-0.573317	0.28327	1.30612	0.115986	-0.277733	0.369106
ECD_02384	putative formate transporter	-0.527617	-0.0946205	-0.176627	-0.130964	0.855999	-0.147428	-0.139384	-0.2043	-0.263008	0.575693	0.561757	0.552343	1.45343	0.615035	0.608278	0.620967	0.639754	-0.478538	-0.217312	-0.221729	-0.212632	-0.19566	-0.31237	-0.229782	-0.247691	-0.247656	-0.214907	-0.430734	0.329311	0.212354	0.486804	0.495265	0.459363	0.453971	0.481994	0.369213	0.36214	0.472518	0.483803	0.406457	0.491863	0.397946	0.332185	-1.65057	-2.38999	0.827512	5.02865	-1.1311
ECD_01238	component I of anthranilate synthase	0.288112	0.146396	0.0744115	0.104556	-0.189819	0.120362	0.17006	0.083313	0.0137755	0.159859	0.348917	0.36237	0.323154	0.377967	0.370836	0.388099	0.382114	0.360557	0.906681	0.886785	0.905094	1.25718	0.77761	0.893558	0.895891	0.867848	0.885314	0.753349	0.46585	0.24261	0.196068	0.816026	0.746417	0.512804	0.55914	0.488083	0.341902	0.521909	0.577369	0.573076	0.55236	0.613763	0.671689	0.6987	1.12048	-0.648774	0.419381	1.01938
ECD_03507	bifunctional (p)ppGpp synthetase II/ guanosine-3',5'-bis pyrophosphate 3'-pyrophosphohydrolase	-0.304967	0.491452	0.321195	0.462142	-0.0369581	0.445951	0.487238	0.389232	0.158719	-0.647124	0.851386	0.800889	0.188456	0.478445	0.4884	0.47482	0.472389	-0.499657	0.40503	0.399008	0.39242	0.416795	0.159735	0.378121	0.332502	0.304929	0.20266	-0.422875	-0.0278141	0.38568	-0.679031	0.272854	0.953539	-0.370779	0.388604	0.341508	-0.184092	-0.045025	-0.185596	-0.280096	0.0649029	0.624475	-0.246894	0.223752	0.155527	0.332965	0.481645	0.192219
ECD_02081	DUF418 family putative inner membrane protein	-0.149402	0.440035	0.360318	0.40495	0.00264895	0.425659	0.398635	0.363258	0.274827	-0.489025	0.7952	0.455306	0.705488	0.48695	0.485163	0.50159	0.502275	0.192367	1.14674	1.12127	1.14004	1.1373	1.05902	1.12028	1.14	1.12664	1.35573	0.933777	0.489317	0.831619	-0.0441667	0.252238	0.251593	0.205664	0.249972	0.45365	0.0755428	0.269981	0.246827	0.225544	0.267972	0.209785	0.725909	-0.425465	-1.47373	0.777958	0.505295	-0.426647
ECD_04354	nucleoid-associated oriC-binding protein; H-NS and StpA stabilizing factor	-0.00974633	0.555447	0.480313	0.516785	0.493102	0.556059	0.53739	0.489559	0.387081	0.479042	0.351668	0.354925	0.286467	0.420294	0.396908	0.428554	0.428981	0.59289	0.645363	0.637995	0.63499	0.631198	0.544809	0.639128	0.593935	0.614123	0.616194	0.380896	0.484284	0.507429	0.134123	0.614998	0.564342	0.774339	0.892068	0.450586	0.395514	0.575872	0.553386	0.498504	0.597457	0.560271	0.350216	0.359004	-2.69101	-0.00479091	0.514821	-0.859863
ECD_00782	OPG biosynthetic transmembrane phosphoethanolamine transferase	-0.103093	-0.2608	-0.303619	3.76089	0.788337	0.0735911	4.10104	-0.341955	0.557858	-0.0729334	-0.15733	5.00739	-0.237903	-0.12893	-0.136461	-0.128519	-0.124751	0.17539	-0.401143	-0.403379	-0.409775	-0.405443	-0.507353	-0.405643	-0.457469	-0.42505	-0.15535	-0.603951	-0.183868	-0.301805	-0.295639	-0.269486	-0.308896	-0.358184	-0.237275	-0.117436	-0.281983	-0.299784	-0.308491	-0.301748	-0.265658	-0.299065	-0.41462	0.454124	-0.0668084	1.5628	0.222552	0.713947
ECD_00480	FimA-like protein	-0.254876	-0.0257897	-0.0817467	-0.0481527	0.00803732	-0.0678213	-0.0538927	4.98621	-0.174341	0.725875	0.129974	0.110586	0.0799456	0.165562	0.16551	0.181619	0.185391	0.524576	0.652778	0.642795	0.659246	0.651107	0.552399	0.63321	0.605116	0.6329	0.663823	0.353521	0.164646	0.545157	0.0274524	-0.556415	-0.554579	-0.59911	-0.578547	-0.65466	-1.02319	-0.527993	-0.546642	-0.574831	0.530592	-0.544728	0.883767	0.143537	-2.58108	0.268551	0.0498039	0.0853057
ECD_02861	putative ATP-binding protein	0.318225	0.827773	0.715027	0.758492	0.905313	0.780723	0.76603	0.740333	0.59823	-0.236099	0.613515	0.61663	0.546256	4.95702	0.639948	0.660373	0.685485	-0.146508	0.763273	0.727424	0.754034	0.752099	0.651988	0.754394	1.02128	0.714472	0.712536	0.438743	-0.25191	0.0479772	-0.0243813	0.720414	0.663344	0.555471	0.842746	0.463941	-0.336708	0.6609	0.640842	0.606341	0.731891	0.62528	0.863792	-0.506487	-0.893991	0.600836	0.983023	-0.590682
ECD_04178	N-acetylnuraminic acid outer membrane channel protein	-0.0817127	-0.376171	0.553944	-0.415559	-1.34412	-0.431099	-0.420863	0.219474	-0.0682257	0.287377	-0.173043	-0.181961	0.497763	-0.0819935	0.771329	-0.0829979	-0.0124449	-0.148416	-0.334465	-0.346923	-0.347374	-0.336721	-0.46757	-0.354308	-0.349916	-0.372489	0.0913222	0.515228	-0.306773	-0.0808102	-0.00148999	0.0533678	-0.635299	-0.166633	-0.706346	0.341357	-0.103589	-0.0251756	-0.736431	-0.765471	-0.572297	-0.669487	0.513614	-0.145005	-0.814315	-0.706748	0.429126	0.662239
ECD_00032	FKBP-type peptidyl-prolyl cis-trans isomerase (rotamase)	0.515237	1.11443	1.07881	1.9524	0.572654	1.09589	1.08707	1.03856	0.901687	0.620383	0.663469	0.675583	0.608425	0.743552	0.740408	0.752217	0.764326	0.595153	1.35318	1.35066	1.35683	1.36653	1.28251	1.33885	1.34607	1.31547	1.36449	1.14644	0.270183	0.786386	0.614916	1.10185	1.06436	1.08141	1.09162	0.975026	-0.121281	2.14469	1.04424	1.03361	1.1409	1.03534	0.925453	0.798834	-2.27798	-0.740717	0.582572	-0.7494
ECD_02036	hypothetical protein	0.272358	-0.529893	-0.597945	-0.567635	-0.736986	-0.545557	-0.551299	-0.591201	-0.64013	0.642106	-0.562168	-0.570708	-0.620323	-0.555849	-0.553197	-0.515374	-0.557875	0.118773	-1.2295	-1.23237	-1.21064	-1.19424	-1.23718	-1.22992	-1.22558	-1.24581	-1.23453	-1.33793	-1.2318	-1.04356	-0.0825724	-0.825576	-0.835526	-0.803831	-0.800983	-0.787923	0.48259	-0.805792	-0.810622	-0.806331	-0.795537	-0.822784	-0.865272	0.351631	1.35563	-0.4972	-0.878935	-1.55865
ECD_02345	ethanolamine utilization protein, HSP70/actin superfamily protein	0.60275	-0.22973	-0.309297	-0.27136	-0.604033	-0.29121	-0.258138	-0.331227	-0.364764	0.226841	-0.187153	-0.158779	-0.243108	-0.138021	-0.139016	-0.119444	-0.106466	0.908635	-0.688214	-0.691858	-0.68345	-0.663361	-0.130374	-0.704092	-0.697997	-0.726697	-0.670231	-0.278683	0.357339	0.679628	0.230248	-0.775567	-0.806513	-0.805768	-0.802461	2.04127	-0.115476	4.94181	-0.7581	-0.809537	-0.785013	-0.315705	-0.868645	-0.035783	1.42865	-0.584602	-0.744914	-1.6045
ECD_02294	aminopeptidase	0.17248	0.266083	0.215754	0.232001	0.213427	0.222263	0.245778	0.185301	0.0895178	-0.38719	0.255579	0.280835	0.192142	0.292532	0.299023	0.314061	0.318241	0.228295	0.180669	0.175371	0.185048	0.201164	0.0680578	0.147315	0.15853	0.129602	0.189845	0.0238257	0.0551694	0.620783	-0.110659	0.0689017	0.0195789	-0.00500522	0.245089	-0.0179895	-0.150201	0.0307497	0.0293961	-0.00379929	0.0351104	0.0282928	-0.0610993	-0.810362	1.47464	0.881431	0.407169	-0.185354
ECD_03729	TatABCE protein translocation system subunit	-0.0272635	-1.19214	-1.30896	-1.22532	-0.703	-1.29039	0.2983	-1.28602	-1.44495	0.0146471	-1.01956	-1.03233	-1.07857	-0.898769	-0.91697	-0.898692	-0.894462	0.181081	-0.772041	-0.790278	-0.767238	-0.750367	-0.942309	-0.787117	-0.858017	-0.850132	-0.916694	-1.35571	0.493794	-0.306814	-0.531611	-1.34031	-1.37997	0.372323	-1.46318	-0.477489	-0.622559	-1.38035	-1.41951	-1.49566	-1.28295	-1.34232	-1.48829	-2.42303	-0.267451	3.04517	1.04939	0.868758
ECD_01882	glyoxalase III and Hsp31 molecular chaperone	-0.434249	-0.0251881	0.435884	-0.0196962	0.0507694	-0.0243986	-0.0353051	4.92822	0.200668	-0.14113	0.273221	0.269431	0.219961	0.296126	0.297585	0.326339	0.328019	0.378075	0.992672	0.972514	0.986131	1.00393	0.990169	0.979395	1.33877	0.979325	1.18993	1.04884	0.098204	-0.0863789	-0.108186	-0.00291865	-0.024286	0.99628	0.00213972	-0.0913704	-0.35106	0.273205	-0.027901	0.833829	-0.00905875	-0.0416258	-0.122422	0.128506	0.213031	0.664401	0.354128	0.510445
ECD_01838	isochorismatase family protein	-0.177184	0.497236	0.454364	0.501494	0.20574	0.487515	0.471048	0.428599	4.02533	-0.82527	0.371596	0.385122	0.333975	0.390033	0.39772	0.417292	0.426874	-0.374359	1.13523	1.10014	1.11709	1.12677	1.10928	1.11902	1.13011	1.12314	1.14508	0.942874	0.155803	0.592233	0.470606	0.715146	0.704117	0.721647	0.730548	0.943325	0.194431	0.683596	0.6867	0.670403	0.711611	0.684736	0.624588	0.46862	1.15779	-0.772212	0.496951	-0.452266
ECD_01064	putative oxidoreductase	-0.0621956	0.605521	0.540764	0.544272	0.306416	0.565434	0.593365	0.521998	0.475495	-0.0692749	-0.030512	-0.00594273	-0.0490283	0.0216703	0.0154171	0.0202086	-0.0020377	0.0616112	0.495493	0.473697	0.495285	0.485343	0.370348	0.4838	0.473263	0.466111	0.489532	0.376628	0.245573	-0.465535	0.39003	0.905479	0.837803	1.47763	0.917634	0.921123	0.141365	0.844486	0.875359	0.89256	0.887427	1.98957	1.46123	-1.0209	-1.66912	-0.201249	0.146663	-0.238859
ECD_01240	PHP domain protein	0.266616	0.148536	0.0912845	0.106589	-0.179595	0.122762	0.17154	0.084987	0.608679	0.408605	0.80959	0.82245	0.777419	0.845923	0.836239	0.844254	0.85962	0.122526	0.820698	0.801026	0.819307	0.823986	0.691871	0.807771	1.54909	0.781718	0.799131	1.3	0.605182	0.868358	0.367695	0.953475	0.897904	0.904281	0.954748	0.87977	0.535962	0.904466	0.956094	0.951341	0.94176	0.934957	0.860832	1.62708	-1.07684	-1.27203	0.174686	-0.527053
ECD_01810	DUF2511 family protein	0.0318816	-1.71611	-1.76427	-1.71618	-1.85431	-1.72159	-1.71865	-1.77804	-1.78164	-0.121091	-1.88183	-1.87953	-1.90531	-1.88649	-1.88096	-1.8377	-1.88714	0.294638	-1.89527	-1.90036	-1.87491	-1.86026	-1.87836	-1.89339	-1.89889	-1.90992	-1.86548	-1.98281	-0.0901935	-0.691709	-0.26881	-2.29579	-2.31515	-2.23376	-2.27198	-2.27984	-0.105373	-2.29981	-2.26551	-2.27446	-2.31494	-2.29323	-2.27927	0.632421	0.636843	-0.958454	-1.8876	-0.695911
ECD_03079	DUF1016 family protein in the PD-(D/E)XK nuclease superfamily	0.143984	-0.114967	-0.224505	-0.181426	-0.612268	-0.169316	-0.160154	0.0985347	0.0271371	-0.0774078	-0.333051	-0.367828	-0.447413	-0.285886	-0.301556	-0.252365	-0.282523	-0.0321321	-0.2316	-0.246978	-0.24377	-0.227135	-0.405984	-0.23761	-0.285899	-0.270782	0.116318	-0.0898397	0.103712	0.226281	0.215913	-0.146942	-0.185328	-0.0794646	-0.214078	-0.119148	0.212397	-0.18206	-0.027901	0.455546	-0.108037	-0.207546	0.0331935	0.216605	-0.156215	-0.418681	0.297006	0.215258
ECD_02031	hydroxy-methylpyrimidine kinase and hydroxy-phosphomethylpyrimidine kinase	0.070249	1.1693	0.935675	0.240701	0.685908	0.243538	0.228947	0.1901	0.116818	0.0974696	-0.00450152	-0.00684263	-0.0576174	0.0385145	0.0347896	0.0585081	0.0359751	0.507998	0.0458057	0.594963	0.635003	0.64413	-0.0208502	0.0184783	0.0433381	0.0352716	0.0364797	-0.15432	0.533051	-0.173599	0.290643	0.382244	0.335802	0.705226	0.748247	0.347967	0.316264	0.37049	0.340795	0.33575	1.23158	1.18128	1.61954	-0.160847	0.253221	-0.0945547	-0.0772647	1.03536
ECD_02223	putative inner membrane transporter; C4-dicarboxylate anaerobic carrier family protein	0.0767069	0.136852	0.0406883	0.102834	-0.38265	0.0929826	0.130476	0.0518065	-0.062586	-0.27836	0.24077	0.243779	0.204292	0.279854	0.278156	0.299394	0.297927	-0.40366	-0.373082	-0.375241	-0.363142	-0.36197	-0.459056	-0.418684	-0.390351	-0.424054	-0.382729	-0.536756	-0.064567	0.489637	-0.327757	-0.4825	-0.521681	-0.252645	-0.475305	-0.556887	-0.0535319	-0.495544	-0.26959	-0.519211	-0.507442	-0.497126	0.0308793	-0.432869	1.01421	0.177549	0.832468	0.0610405
ECD_00424	protein refolding molecular co-chaperone Hsp90, Hsp70-dependent; heat-shock protein; ATPase	0.0896179	-0.0368065	1.61897	-0.0918584	-0.491373	0.00653461	-0.0973328	-0.038732	-0.207756	0.388731	-0.0101151	-0.0474929	-0.0500057	0.022006	0.0289539	0.0408912	0.927784	0.152593	0.0216666	0.230902	0.0246169	0.0463446	-0.0139688	0.0191524	0.0201405	0.016651	-0.00493477	-0.0260396	0.159742	0.00823425	0.12985	-0.232246	-0.273602	-0.0470768	-0.13042	-0.32536	0.0733776	-0.260859	-0.269789	-0.267523	-0.214305	-0.0470047	-0.374356	0.95779	1.46195	-0.103156	0.516498	4.86216
ECD_00860	putrescine ABC transporter ATPase	-0.238187	0.368774	0.70815	0.330748	0.290393	0.345953	0.339792	0.291702	0.243718	0.226809	0.231429	0.247092	0.191551	0.260155	0.253668	0.271408	0.275469	-0.26672	0.29848	0.293905	0.296505	0.307984	0.197686	0.291893	0.290047	0.278241	0.283146	0.103218	0.17792	-0.468467	-0.00244182	0.208961	0.145196	0.118151	0.215155	0.654812	0.10556	0.12511	0.246675	0.1548	0.164681	0.175111	0.202067	0.030514	-0.439501	-0.38156	0.390838	-0.660003
ECD_02328	N-acetylmuramic acid 6-phosphate (MurNAc-6-P) etherase	0.196568	-0.90413	-0.968052	-0.907782	-1.08508	-0.951427	-0.918711	-0.988139	-0.326148	0.501297	-1.07312	-1.05205	-1.1357	-1.04259	-1.01716	-0.995442	-1.01539	0.371908	-0.98441	-0.985342	-0.985674	-0.967569	-1.07806	-1.0078	-1.01621	-1.03595	-1.00021	-0.971996	0.470997	-0.0919907	0.347906	-0.671931	-0.699912	-0.74413	-0.395458	-0.265146	0.497478	-0.482826	-0.677727	-0.742479	-0.680132	-0.551174	-0.846371	0.718694	-3.23544	-0.398975	-0.894688	-0.360693
ECD_02126	heme export ABC transporter permease; CcmE-interacting protein	-0.0728037	-0.24341	-0.302671	-0.274518	0.078618	-0.267166	-0.269989	-0.309588	-0.427677	0.146934	-0.0203633	-0.0536578	0.593529	0.0050091	-0.000307001	0.0156952	0.0276959	0.489979	-0.194197	-0.221247	-0.201501	-0.218732	-0.26931	-0.216566	-0.183901	-0.212737	-0.168398	-0.375003	0.400247	0.383607	0.305206	-0.488358	-0.521792	-0.517595	-0.478586	-0.540523	0.138807	-0.504884	-0.517738	-0.536846	-0.504082	-0.50514	-0.618591	0.589856	2.00672	-0.085627	-0.688434	-0.824182
ECD_01015	pyrimidine oxygenase, FMN-dependent	-0.232624	-0.354369	-0.427263	-0.406274	-0.694094	-0.366837	-0.378642	-0.442861	-0.483342	-0.273152	-0.109322	-0.104655	-0.141461	-0.0932808	-0.0975705	-0.0770328	-0.0816161	0.34089	-0.0760414	-0.0910507	-0.0738679	-0.0653634	-0.182664	-0.0853005	-0.0942652	-0.0927191	-0.0739933	-0.20836	0.268955	0.489583	-0.584677	-0.121579	0.0493332	-0.115564	-0.107785	0.143119	-0.156655	-0.161976	-0.13122	-0.119593	-0.130321	-0.128513	-0.195302	-0.315232	-1.63006	0.476675	0.593731	0.0298496
ECD_03403	glyoxylate/hydroxypyruvate reductase B	-0.157828	-0.698148	-0.894853	-0.500685	-1.38512	-0.749125	-0.746882	-0.858346	-0.673569	0.154855	-0.889551	-0.838604	-0.288838	-0.679307	-0.668948	-0.679303	-0.680593	-0.196205	-0.850118	-0.885343	-0.878852	-0.909294	-0.726319	-0.919307	-0.593224	-0.972897	-1.07513	-0.780582	-0.0884038	0.125886	-0.123677	-0.287524	-0.741861	-0.133018	-0.120319	0.382166	0.133415	-0.704185	-0.84597	-0.932727	-0.612424	-0.74181	1.45165	0.106372	0.148749	-0.120563	0.0687463	0.985534
ECD_00858	negative regulator of motility; multicopy suppressor of coaA(Ts)	0.152304	-0.323736	-0.397484	-0.36016	-0.705866	-0.345787	-0.34986	0.971685	-0.452005	0.158589	0.0851023	0.0978052	0.0450148	0.109829	0.10358	0.122226	0.1207	-0.141179	-0.882005	-0.885017	-0.879143	-0.867039	-0.975708	-0.887738	-0.928841	-0.903453	-0.899278	-1.0828	-1.39817	0.668435	-0.314517	-0.341307	-0.393098	-0.428356	-0.328484	-0.420975	0.0269717	-0.395714	-0.40574	-0.381086	-0.385285	-0.36406	-0.498159	-2.62047	1.61734	-0.970887	0.233954	1.43181
ECD_01322	Rac prophage; integrase	0.541536	-0.0710569	-0.129797	-0.0944686	-0.364515	-0.106143	-0.0687006	0.513882	-0.187027	0.776573	-0.210729	-0.206409	-0.227684	-0.183233	-0.184595	-0.164194	-0.186498	0.79896	-0.14638	-0.148275	-0.138898	-0.122334	-0.172173	-0.150535	-0.149215	-0.166442	-0.128475	0.179556	0.0881603	-0.177222	-0.537317	0.274041	0.206278	0.210045	0.573754	0.141274	0.446802	0.195404	0.71165	0.247411	0.233281	0.217567	0.306506	0.138383	-1.58745	-0.402945	-0.51287	-1.13111
ECD_02738	2-octaprenylphenol hydroxylase, FAD-dependent	-0.445575	2.895	2.84549	2.84038	2.16016	2.89376	2.82202	2.80955	2.68661	-1.03153	1.84645	1.83662	1.78705	1.91963	1.8815	1.9054	1.94854	-1.94977	1.54452	1.5268	1.5373	1.52217	1.43645	1.52865	1.50049	1.52045	1.51386	1.23752	-1.27133	0.0723686	-1.28479	0.976467	0.930092	0.853057	0.936235	0.817208	-1.86337	0.953878	0.921862	0.882301	0.988826	0.925509	0.76666	-2.52425	-1.69734	-0.787716	1.32705	-0.139144
ECD_00741	7,8-diaminopelargonic acid synthase, PLP-dependent	-0.182197	-0.623687	-0.665631	-0.62983	0.353868	-0.660015	-0.618377	-0.699417	-0.390025	0.463974	0.035407	-0.350112	-0.404218	-0.2875	-0.292689	-0.304375	-0.274518	0.712447	-0.104405	-0.109843	-0.127331	-0.123653	-0.239347	-0.138891	-0.164866	-0.155872	-0.14023	0.545765	0.365487	-0.307561	-0.0998958	-0.652274	-0.655202	-0.479107	-0.0434741	-0.523398	-0.194206	-0.653712	-0.544015	-0.694441	-0.633367	-0.654521	-0.62977	-0.140608	0.842732	-0.105332	-0.193929	0.0925519
ECD_01255	phosphatidylglycerophosphatase B	0.511856	0.799	0.749648	0.75601	0.464024	0.777816	0.802565	1.32802	0.658877	0.261468	1.0136	1.01611	0.975439	1.04311	1.03494	1.03658	1.05329	0.213261	1.10368	1.08992	1.11776	1.11282	0.997641	1.10632	1.11065	1.08013	1.10324	1.21723	-0.0468367	0.0345066	0.0776713	0.589204	0.5346	0.527255	0.580182	0.509998	-0.541817	0.544474	0.569279	0.588048	0.582269	0.570879	0.491369	-0.292064	1.10268	-0.189697	0.86359	0.784927
ECD_02469	tRNA1(Val) (adenine(37)-N6)-methyltransferase	0.0653409	-0.463767	-0.561636	-0.504793	-0.564746	-0.0583134	-0.516457	2.20381	-0.334753	0.277221	-0.480593	-0.478086	-0.513699	-0.406748	-0.404748	-0.402936	-0.389089	0.28983	-0.503139	-0.51432	-0.504724	-0.493502	-0.595943	-0.518976	-0.476932	-0.531294	-0.487657	-0.217797	0.132114	-0.0583599	-0.15246	-0.274027	-0.741667	-0.688449	-0.727651	-0.3732	-0.242272	-0.729742	-0.720155	-0.77079	-0.703019	-0.649642	-0.062189	0.274194	0.119628	1.5153	-0.485652	0.403384
ECD_00591	anaerobic C4-dicarboxylate transport	-0.174404	-0.0995911	-0.479992	-0.419786	-0.36307	-0.435168	-0.437044	-0.466574	-0.576978	0.0884609	-0.135987	4.80449	0.114931	-0.0669464	-0.0665627	-0.0616773	-0.0428451	-0.246363	-0.245311	-0.257896	-0.269744	-0.243353	-0.369217	-0.260674	-0.294532	-0.265748	-0.278946	-0.547724	-0.218735	-0.0738268	-0.0789418	-0.0149776	-0.0416084	-0.0602421	-0.0441158	-0.113106	0.139517	4.42289	-0.027901	-0.072487	0.00261969	-0.0694401	0.348512	-0.0356701	-0.363528	0.25656	-0.11923	-0.15162
ECD_01201	nitrate/nitrite transporter	-0.0218158	-0.76841	-0.857936	0.198627	-0.374302	-0.834761	-0.731888	-0.853203	-0.882522	0.926547	0.0592224	0.0762993	0.031236	0.0874752	0.0811618	0.0911202	0.0905669	-1.03339	-0.360413	-0.363093	-0.35391	-0.349657	0.129826	-0.364944	-0.378523	-0.393853	-0.364977	-0.141257	-0.456592	-0.119529	0.195076	-0.589245	-0.633302	-0.635661	-0.606695	-0.657686	-0.243811	0.312164	-0.588401	-0.564806	-0.625697	-0.608577	-0.683214	-0.674591	-1.46111	1.52662	-0.0977815	1.38299
ECD_02230	transposase_31 family protein	-0.150166	-0.092586	-0.175832	-0.121685	-0.625717	-0.118654	-0.10454	-0.184836	-0.278986	0.0324994	0.261334	0.264815	0.206	0.288667	0.300862	0.322574	0.324132	-0.0418637	-0.266192	-0.270903	-0.257258	-0.247353	-0.342962	-0.281502	0.50318	-0.286872	-0.251872	-0.423655	-0.882164	0.130447	0.976852	0.246732	0.220781	0.221576	0.25764	0.174343	0.249101	0.255798	0.220914	1.31364	0.244257	0.228405	0.128174	-1.03678	-0.173885	-1.07145	0.0991365	-0.992524
ECD_03436	putative regulatory protein	-0.20077	1.10451	0.903628	1.0714	-0.108114	1.07413	1.7463	0.956382	0.831961	-0.186564	0.695985	0.720765	0.620521	0.88322	0.886679	0.8818	0.906751	0.269247	1.60765	4.76956	1.58294	1.59731	2.00911	1.54723	1.45028	1.49627	1.38274	1.09078	0.263106	0.504925	0.223185	1.24581	1.22751	0.906005	1.79153	1.96564	-0.560818	1.23425	1.10648	1.02783	1.36681	1.3863	1.5182	-0.723874	-0.710884	0.100653	1.17671	0.0896202
ECD_00594	fluoride efflux channel, dual topology membrane protein	-0.464612	-1.0706	-1.15098	-1.0923	-0.10793	-1.11846	-1.10157	-1.14785	-0.330887	-0.621814	-0.654675	-0.663755	-0.740664	-0.585393	-0.589286	-0.566083	-0.572415	-0.196996	-1.01507	-1.01845	-1.03935	-1.01122	-1.13524	-1.0219	-1.07261	-1.03794	-1.04949	-0.550126	-0.291971	0.306008	-0.44178	-0.823182	-0.84344	-0.867274	-0.852432	-0.9302	0.022735	-0.821702	0.0466307	-0.876987	-0.80126	-0.879829	0.755791	-6.11156	-3.15808	-2.6754	-0.859116	-0.203342
ECD_04052	DUF1190 family protein	0.0718569	-0.7132	0.312472	-0.731636	-0.720777	-0.749295	-0.689578	-0.795828	-0.764414	0.0487673	-0.733052	-0.777954	-0.821942	-0.656888	-0.621555	-0.625922	-0.626367	-0.142825	-0.598827	-0.589699	-0.608027	-0.632157	-0.779898	-0.370735	-0.669009	-0.680028	-0.716699	-0.823286	-0.12193	-0.00944148	-0.146883	-0.582989	-0.723933	-0.949235	-0.796176	-1.03693	-0.00413036	-0.720114	-0.195212	-0.840094	-0.625363	0.299682	-0.519227	-0.224904	-0.300247	-0.250381	-0.586649	0.360799
ECD_00209	lipoprotein	-0.0869491	1.05233	1.01139	1.02424	3.41908	1.03129	1.02576	0.979123	0.814003	-0.870614	1.28743	1.30227	1.22786	1.38419	1.37542	1.38557	1.41217	-0.75841	0.76478	0.759512	0.767908	0.770354	0.679711	0.75777	0.728532	0.734692	0.743045	0.473541	-1.39213	0.35697	0.5636	1.06237	1.02344	1.42225	1.01735	0.847494	-1.14083	1.04335	0.998062	0.961912	1.07873	0.979172	1.99799	0.537553	-2.16477	1.00637	1.39367	-0.579077
ECD_04065	L-ribulose 5-phosphate 4-epimerase	0.0447917	-0.023183	-0.136315	3.67679	0.162058	-0.0639913	0.417253	-0.113196	-0.27534	0.160225	0.145116	0.0882882	0.505746	0.228162	0.238227	0.243837	0.26406	0.349541	0.530305	0.543939	0.526232	0.589944	0.703574	0.503426	0.480523	0.456045	0.454106	0.539586	0.170516	-0.0085529	0.241222	0.0206236	0.00348024	-0.217339	0.545748	-0.00847435	0.262208	0.00538749	-0.0569122	0.165028	0.108712	0.0148669	0.740921	-0.233063	0.281529	0.0692079	3.43658	-0.819853
ECD_01164	D-amino acid dehydrogenase	-0.258635	-0.870886	-0.950941	-0.980066	-0.752272	-0.937802	-0.86466	-0.946077	-1.00338	0.529534	-1.06576	-0.37137	-1.07404	-1.02875	-1.03406	-1.02132	-1.03165	0.412741	-0.98032	-0.999554	-0.98399	-0.972633	-0.470434	-0.98617	-1.00232	-1.01236	-0.989923	-0.541814	0.290484	0.619817	0.623713	-1.0164	-0.619363	-0.191445	-1.00486	-1.00093	0.450017	-1.04772	-1.01383	-0.991225	-1.03652	-1.03309	-0.198065	1.24051	1.30127	0.2818	-1.09246	-0.513889
ECD_01368	putative ATP-dependent helicase	0.456565	1.16146	1.11458	1.14682	0.860792	1.13728	1.15775	1.08653	1.04448	0.410248	0.363664	0.366885	0.338679	0.391134	0.384612	0.403336	0.403029	0.0702915	0.756012	0.754096	0.764456	0.771323	0.731986	0.752931	0.997332	0.740521	0.763608	0.696429	0.540886	0.35873	-0.00343135	0.349028	0.267785	0.283145	0.310381	0.495152	-0.171572	0.275067	0.312359	0.3246	0.327737	0.280121	0.943542	-0.490575	-0.532304	-1.38406	0.586522	1.34801
ECD_02245	erythronate-4-phosphate dehydrogenase	0.163897	0.0785438	0.000114565	0.317454	-0.332987	0.03625	0.0649884	-0.0128389	-0.0972503	0.371898	-0.204093	-0.197584	0.0352874	-0.159626	-0.157661	-0.1348	-0.136464	0.151391	0.0505909	0.0391902	0.0656301	0.0645119	-0.00669243	0.0284545	0.0502949	0.0274874	0.0703725	-0.100819	0.186256	-0.0354286	0.14837	-0.129946	-0.155405	-0.117348	-0.135394	0.841832	0.478929	-0.125874	-0.164953	-0.173158	-0.137434	-0.147459	0.00128647	-0.490269	1.0921	-0.459692	-0.0892429	0.679647
ECD_02998	N-acetylgalactosamine-specific enzyme IIB component of PTS	0.261604	-0.112139	-0.226967	-0.170797	-0.982487	-0.19963	-0.180679	-0.21865	-0.358769	-0.350482	-0.127918	-0.114312	-0.256505	-0.0754468	-0.0800526	-0.0607149	-0.0627069	0.516015	0.304917	0.277304	0.280539	0.303023	0.150193	0.297064	0.667427	0.255285	0.251648	-0.104815	-0.923153	0.337717	-0.421995	-0.305877	-0.345113	-0.461871	0.262773	0.848804	-0.71008	-0.332575	-0.393453	0.818401	-0.310331	-0.404785	-0.503535	-1.98159	-0.328569	0.6352	-0.0138131	-1.7418
ECD_04150	IS600 ORF1-like protein	0.108821	-0.0662974	-0.146159	0.179924	-1.02343	-0.123748	-0.104739	-0.192051	-0.336092	-0.139068	-0.340018	-0.347798	-0.445391	-0.263492	-0.228965	-0.241565	-0.213615	-0.0494061	-0.324017	-0.326609	-0.327951	-0.312794	-0.445061	-0.335165	-0.359225	0.255567	-0.366091	0.264749	-0.117452	-0.231788	0.14834	-0.0502446	-0.0774699	-0.257864	-0.158576	-0.363265	0.372653	-0.0645165	-0.170814	-0.199162	-0.0181351	0.275487	-0.327722	-0.212025	0.382367	-0.0582238	-0.29167	0.0419813
ECD_00398	thiamine pyrimidine pyrophosphate hydrolase; HMP-PP phosphatase	-0.527509	0.246702	0.152429	-0.141772	1.25142	-0.139426	-0.144755	-0.178354	-0.254454	-0.096221	0.177511	0.144723	0.120866	0.226	0.224986	0.233951	0.256173	0.0378381	0.0743026	0.0706383	0.0704849	0.0864905	0.558645	0.0614069	0.0345835	0.0451417	0.046648	-0.21923	0.30672	-0.177797	-0.05062	1.05995	0.218676	0.194336	0.386838	0.115106	-0.0547644	0.230565	0.21204	0.63255	0.290115	0.234793	0.168612	0.349038	0.867983	1.18904	0.786971	-1.08972
ECD_01631	putative arabinose efflux transporter	0.0413943	0.780383	0.78412	0.813577	1.81526	0.769804	0.777013	0.71829	1.88376	-0.102928	1.93911	1.94537	1.90674	1.97989	1.98266	1.97644	2.0274	-0.242784	1.61114	1.60405	1.61524	1.61515	1.57445	1.60376	1.62596	1.61348	1.65863	1.51909	-0.642115	0.341088	0.256173	3.81205	4.6556	3.75368	3.85336	3.75231	1.45398	3.69741	3.65999	4.01895	3.75677	3.72254	3.63995	0.72344	-0.224589	-0.313658	0.772849	0.0799758
ECD_00781	outer membrane protein X	0.133544	-0.985558	-1.03585	-0.967607	-1.13452	-0.998617	-0.974173	-1.06796	-1.1558	0.119705	-1.1439	-1.20125	-1.21577	-1.11762	-1.13303	-1.11038	-1.12319	0.519683	-0.923571	-0.925493	-0.937213	-0.92498	-0.359816	-0.927795	-0.979563	-0.953163	-0.862186	0.241789	0.193215	-0.27692	0.431707	-1.07993	-1.12038	-1.03624	-0.0171652	-0.216536	0.348154	-1.10733	-1.11953	-1.11038	-1.0834	-1.10806	-1.22365	1.07328	0.699624	0.282063	-0.822639	0.790259
ECD_04167	putative phosphotransferase enzyme IIA component	-0.0299868	0.457051	0.377763	0.418444	1.38052	0.400515	0.41619	0.329606	0.18566	0.452648	0.279641	4.65199	0.381312	0.358752	0.392377	0.376454	0.411946	-0.204386	0.0991112	0.0952177	0.0940115	0.108561	-0.0234559	0.0868203	0.0663398	0.216653	0.0582434	0.134697	0.0880698	0.25207	-0.293281	-0.223626	-0.250582	-0.0194378	0.0971361	-0.537083	0.00555556	-0.237413	-0.0370836	-0.11028	-0.191446	-0.288355	-0.50121	-0.137447	0.322549	0.17663	0.383684	-0.8069
ECD_00418	primosomal replication protein N''	0.346857	-1.87942	-1.9499	-1.90278	-2.52356	-1.91431	-1.88957	-1.92817	-2.01189	-0.273152	-1.87848	-1.91703	-1.9131	-1.85716	-1.84506	-1.82146	-1.84133	0.571149	-1.51757	-1.51697	-1.51239	-1.48935	-1.60548	-1.517	-1.58154	-1.55533	-1.55282	-1.80713	-0.0929062	-0.081006	-0.509184	-2.14751	-2.18411	-2.22239	0.566957	-2.27951	0.00222807	-2.1667	-2.17126	-2.2095	-2.1275	-0.204692	-1.3331	1.32509	0.277622	-0.144133	-1.95198	-0.651794
ECD_01082	23S rRNA pseudouridine(955,2504,2580) synthase	0.0721553	0.207771	0.144296	0.145526	0.265832	0.156761	0.204261	0.11322	0.0648073	0.114132	0.366673	0.371977	0.332341	0.394596	0.387888	0.40221	0.409787	0.0577994	0.293807	0.270313	0.295483	0.290499	0.183536	0.26867	0.283255	0.260855	0.297004	0.413034	-0.118128	0.460744	-0.000123983	0.107088	0.0570937	0.107366	0.123275	0.120115	-0.324035	0.060861	0.0961757	0.120324	0.0740116	0.0894868	0.253059	1.33893	-0.106182	-0.539726	0.148345	-0.642158
ECD_03805	DUF1454 family putative periplasmic protein	-0.180942	0.0291361	-0.078926	0.00072625	0.285476	-0.0452304	0.151538	-0.0668793	0.113763	-0.062635	4.63105	-0.0430774	0.51208	0.0515667	0.0536658	0.0561117	0.0402823	-0.00467726	0.489241	0.457652	0.477719	0.473434	1.01014	0.460378	0.384254	0.392397	0.359784	1.22772	0.225255	0.0659127	-0.031041	0.159319	0.388922	-0.121771	0.382382	0.46098	0.376296	0.127922	0.268055	0.209766	0.221725	0.139318	-0.0531317	-0.0263915	-1.49929	-0.584738	0.064107	-0.028374
ECD_04168	putative nucleoside triphosphatase	0.0682703	-0.0153324	0.10657	-0.0543244	0.770108	-0.0710651	-0.0579945	-0.144083	-0.288421	0.195989	0.0644318	0.317726	-0.0428805	0.143115	0.176888	0.161516	0.195772	0.103698	-0.0153629	-0.0196657	-0.0208318	0.195585	0.237846	0.167006	-0.0473395	-0.0592481	-0.0558454	0.186132	0.0304153	-0.427377	0.369087	0.193655	0.080395	0.490649	0.00400437	0.0902315	0.121332	0.139714	-0.0166094	0.405314	0.141445	0.0445609	0.611638	0.0198878	-0.318171	0.248886	0.0567029	-0.113693
ECD_01408	putative iron outer membrane transporter	-0.0184606	0.0721946	-0.491387	-0.446377	-0.679194	-0.488013	-0.444739	-0.522801	-0.552811	-0.0643134	-0.379899	-0.375001	-0.406299	-0.369105	-0.369334	-0.343177	-0.359366	-0.044432	-0.530044	-0.525798	-0.516559	-0.505913	-0.548875	-0.528194	-0.53062	-0.550238	-0.504276	0.0451994	0.33458	-0.180279	-0.206136	-0.412623	-0.486478	-0.480348	-0.439085	0.26957	0.0865206	-0.48802	-0.43054	-0.446717	-0.432001	-0.479568	-0.49768	0.508045	1.4233	-0.486397	-0.521998	-1.16712
ECD_01290	putative Zn-dependent NAD(P)-binding oxidoreductase	0.579294	-0.0914215	-0.149781	-0.135373	-0.423018	0.397401	-0.0795103	-0.156658	-0.211198	0.940502	0.246475	0.250974	0.218245	0.262052	0.263485	0.277538	0.278064	0.510776	-0.0260448	-0.0326314	-0.00405674	-0.00731793	-0.109461	-0.0157046	-0.021867	-0.0433398	-0.015106	-0.141682	-0.304049	-0.855019	0.244948	0.757379	0.70205	0.70606	0.732505	0.640634	0.507665	0.705366	0.741786	4.62092	0.734591	0.730274	0.639936	-1.65937	-1.18682	3.78665	0.0421716	0.300955
ECD_00551	enterobactin/ferrienterobactin esterase	-0.162074	-0.0147487	-0.0643483	-0.0384381	-0.279178	-0.0384305	-0.0229672	-0.0670823	0.0877011	-0.210021	0.216123	0.185997	0.13157	0.24056	0.248971	0.25383	0.268763	-0.0997219	-0.0396126	-0.0586179	-0.0320052	-0.0539387	-0.135892	0.261511	-0.0849614	-0.0693623	-0.0451948	-0.249243	-0.317942	-0.518271	-0.0453416	0.471982	4.618	-0.128317	-0.102125	0.228223	0.264138	0.496962	-0.104917	-0.115888	-0.0491416	-0.0900689	-0.102484	-0.438645	-0.594103	0.526236	-0.239958	-1.57335
ECD_02257	DUF2544 family putative outer membrane protein	0.0777269	0.537468	0.468583	0.506506	0.678852	0.730895	0.517201	0.441736	0.362003	0.658185	0.74427	1.02023	0.918204	0.768156	0.763375	1.06906	0.793009	-0.0342367	0.705953	0.688495	0.720803	0.712992	0.861283	0.682844	0.699096	0.676092	0.71929	0.556697	0.393926	0.270756	0.277491	0.519412	0.483439	0.469597	0.502825	0.455969	0.31481	0.50412	0.462113	1.73133	0.494769	0.731908	0.486259	-0.391843	-1.73679	0.178673	0.589341	1.51485
ECD_00846	hypothetical protein	-0.124734	0.00995884	-0.0565818	-0.0187037	-0.391505	-0.0223633	-0.0120883	-0.0611778	-0.121829	-0.624917	-0.446636	-0.441891	-0.49262	-0.415016	-0.419691	-0.413607	-0.414713	0.258997	-0.0323674	-0.0476262	-0.0380442	-0.0330411	-0.115847	-0.0496389	-0.0733179	-0.0525861	-0.0477192	0.00229423	-0.0653508	-0.494043	0.101694	-0.0962907	0.325942	0.685428	-0.0725084	0.663836	0.112797	-0.170773	-0.166346	-0.145144	-0.140439	-0.130084	0.327283	-0.484328	0.681093	-0.705612	-0.500369	-1.54878
ECD_00692	cytochrome d terminal oxidase, subunit I	-1.47493	4.51712	4.50998	4.46219	3.87386	4.54183	4.39916	4.35819	4.24509	-3.62801	2.5355	2.47936	2.44038	2.58961	2.57805	2.54657	2.63734	-3.10702	3.57956	3.53279	3.53489	3.52728	3.40032	3.81643	3.5895	3.54883	3.57838	3.32045	-1.56852	0.368073	-3.64215	2.92175	2.87339	3.53273	2.95708	2.90106	-3.8035	2.85908	2.83698	2.81026	2.92625	2.90534	2.76195	-3.27761	0.326936	-1.40355	0.818355	1.19564
ECD_02098	fused fructose-specific PTS enzymes: IIA component/HPr component	-0.100481	-0.269935	-0.352463	-0.316828	-0.710988	-0.301115	-0.312895	-0.339385	-0.438902	0.63082	0.168067	0.151549	0.124906	0.185752	0.181505	0.201402	0.202318	-0.193338	-0.317488	-0.322562	-0.313151	-0.309926	-0.365264	-0.0554132	-0.338176	-0.337446	-0.311017	-0.496654	-0.122167	-0.202438	0.198936	-0.422557	-0.453507	-0.0959541	0.180467	-0.498551	0.151902	-0.43733	-0.440004	-0.471311	-0.436346	-0.436855	-0.204765	1.10503	-1.42573	0.454088	-0.469315	0.270476
ECD_01093	septation protein, ampicillin sensitivity	0.0642128	-0.078473	-0.142006	-0.145268	-0.131832	-0.130111	-0.0970769	-0.171358	0.041216	0.062313	-0.223616	-0.188127	-0.224897	-0.177509	-0.182882	-0.160165	-0.16361	0.122121	-0.00828139	-0.0173106	-0.00279866	0.00776502	0.247855	-0.0185766	-0.0152246	-0.0294461	-0.00853602	-0.108284	0.514678	0.468008	-0.046707	-0.0389246	-0.0884478	-0.0478816	-0.0353705	-0.0396409	-0.0796406	-0.088209	0.129048	-0.0245967	-0.0718796	-0.0565318	0.232157	-0.035079	1.17843	-0.928322	0.251786	0.970402
ECD_00409	DUF1449 family inner membrane protein	-0.182778	-1.02343	-0.503707	-1.05797	-0.728705	-1.0667	-1.05036	-1.08986	-1.16935	0.123794	-0.781459	-0.290387	-0.21644	-0.760064	-0.75174	-0.73376	-0.733199	0.252412	-0.766774	-0.763592	-0.754151	-0.734532	-0.855803	-0.765719	-0.629102	-0.806174	-0.794706	0.208783	0.189452	0.4832	-0.328472	-1.33321	-0.922663	-0.58411	-1.37484	-1.45985	-0.186824	-1.35217	-1.35905	-0.890007	-1.30971	-0.690434	-1.27509	-0.31222	0.0956217	-0.0317873	-1.01338	-0.726347
ECD_00358	HNH nuclease family protein	-0.263682	-1.08912	-1.17573	4.52665	-1.78348	-1.10347	-1.11279	-1.16296	-1.23613	-0.339835	-0.60413	-0.645932	-0.648918	-0.574945	-0.570453	-0.54042	-0.561641	0.0336662	-0.790987	-0.7813	-0.785675	-0.754844	-0.868461	-0.797198	-0.809272	-0.824256	-0.803123	-1.0753	-0.412606	0.00112321	-0.285947	-1.2014	-1.23568	-1.31066	-1.2585	-1.4018	0.0797739	-1.23432	-1.2611	-0.550338	-1.17772	-1.2566	-1.42831	-0.676784	0.720856	0.873888	-0.67495	-1.49435
ECD_00306	4-hyroxy-2-oxovalerate/4-hydroxy-2-oxopentanoic acid aldolase, class I	0.458613	0.419566	0.335538	0.394517	0.607268	0.369789	0.63038	0.318657	0.425142	0.0640557	-0.00740962	-0.0687408	-0.0792597	0.0260954	0.0429491	0.0519627	0.0524669	-0.0231575	0.01757	0.0205963	0.0140413	0.0373534	-0.0604962	0.00900667	0.0100316	-0.0151666	0.268481	-0.232793	0.25669	-0.00423319	0.106561	0.0390862	-0.0372462	-0.0797083	-0.0174178	0.413435	0.208674	-0.00890494	-0.0281041	-0.100876	0.0311455	-0.0593714	-0.245268	0.498462	0.835888	-0.0156536	-0.119793	1.01624
ECD_01055	N-methyltryptophan oxidase, FAD-binding	-0.233208	-0.627301	-0.694787	-0.673049	-0.918783	-0.651899	-0.631391	-0.704682	-0.751699	0.183923	-0.419731	-0.407026	-0.447437	-0.393847	-0.397526	-0.377777	-0.403324	-0.149389	-0.700491	-0.704749	-0.69068	-0.686681	-0.802635	-0.701559	-0.748689	-0.735256	-0.71196	-0.808263	-0.325914	-0.301405	-0.0182845	-0.673294	-0.720683	-0.689571	-0.678707	-0.685602	-0.00050284	-0.725514	-0.678474	-0.6783	-0.354576	-0.695373	-0.746852	-1.72439	1.27054	-0.0995043	-0.619249	0.106294
ECD_01366	putative phosphatase inner membrane protein	-0.525325	0.262343	0.209984	0.245735	1.00134	0.225981	0.263418	4.01256	0.15046	-0.296983	-0.0323279	-0.0281049	-0.0503364	-0.00367242	-0.0054466	0.0134554	-0.00542776	-0.256111	-0.378061	-0.372285	-0.362824	-0.352425	-0.393613	-0.374385	-0.0727596	-0.398978	-0.377861	-0.439571	0.0218453	0.158187	0.0918203	0.0567737	-0.0212092	-0.00964986	0.0146065	-0.0655575	0.0999551	-0.0115967	0.0283465	0.0409217	0.03633	0.837732	0.340391	0.592496	0.636216	-0.0762225	-0.243506	-0.863414
ECD_04218	metal-binding GTPase	0.203829	0.345364	0.267034	0.305839	0.118297	0.892831	0.300632	0.515115	0.0708221	0.337458	0.372077	0.619199	0.262402	1.52042	0.48629	0.467506	0.509611	0.0560161	0.196998	0.192504	0.19137	0.205645	0.0737823	0.184179	0.401187	0.15325	0.156714	-0.30128	0.141036	0.200693	-0.288768	0.216799	0.188236	0.00936088	0.362266	0.214197	0.0337674	0.200215	0.0927612	0.842124	0.248564	0.484665	0.422362	0.106718	0.599166	0.0425507	0.588071	0.210007
ECD_00586	citrate lyase ligase; [citrate [pro-3S]-lyase] ligase	-0.118036	-0.219551	-0.294655	-0.243541	-0.458611	-0.247414	-0.247858	-0.294156	-0.27363	-0.219249	-0.0230034	4.49044	-0.103956	0.0491908	0.0484774	0.0493782	0.077413	-0.266843	-0.221499	-0.232995	-0.234412	-0.21902	-0.351833	-0.24294	-0.268871	-0.243122	-0.247424	-0.293497	0.129562	0.0728631	-0.0327737	0.506929	0.260434	0.547264	0.266437	0.825696	0.366617	0.607592	0.271747	0.242863	0.305257	0.23235	0.121849	-0.176654	-0.692267	-0.0728139	-0.0576481	0.545493
ECD_00783	hypothetical protein	-0.39104	-0.620834	-0.664164	-0.602257	-1.03319	4.48359	-0.614856	-0.700481	0.183054	0.0187166	-0.729808	-0.787133	-0.801485	-0.703832	-0.719171	-0.696193	-0.70976	0.0277492	-0.625205	-0.626557	-0.638305	-0.625801	-0.725023	-0.628927	-0.682273	-0.65518	-0.650451	-0.825116	0.243439	0.0871951	0.482733	-0.490798	-0.529401	-0.579865	-0.459546	-0.569872	0.30769	-0.519685	-0.527343	-0.521082	-0.48676	-0.0362323	-0.63538	0.524518	0.928743	0.0769403	-0.260175	-1.82204
ECD_00531	copper-sensing histidine kinase in two-component regulatory system with CusR	-0.00162823	0.629502	0.57304	0.600544	0.0332394	0.825831	0.606178	0.558819	0.440628	-0.089352	4.48065	0.558802	0.509955	0.60977	0.605758	0.621818	0.635255	0.214086	0.848194	0.835278	0.845155	0.835551	0.749832	0.831889	0.810702	0.825383	1.02066	0.568075	-0.141403	0.374231	-0.439	0.241015	0.192204	0.184257	0.219036	0.140649	-0.140751	0.207875	0.210436	0.201537	0.278044	0.24713	1.10167	-0.410266	0.3272	0.0124738	0.245976	0.889208
ECD_03816	molecular chaperone and ATPase component of HslUV protease	-0.221115	1.08595	0.992336	1.06566	0.0925896	1.03269	0.980317	0.995227	1.39869	-0.182013	1.75642	1.40911	1.32026	1.50683	1.50712	1.49563	1.50765	-0.613943	1.63393	1.59361	1.69791	1.60827	1.55017	1.59678	1.5306	1.53307	1.49418	1.08539	-0.6903	0.254635	-0.179231	1.15789	1.1246	1.50907	0.9951	1.53646	-0.429487	1.11767	1.03032	0.947956	1.2151	1.12197	0.929638	-2.44942	-2.86926	-0.384881	1.07054	1.59778
ECD_02440	putative sugar ABC transporter periplasmic binding protein	-0.00752785	-0.419399	-0.519589	-0.458386	-0.0207701	-0.459656	-0.465434	-0.546277	-0.590957	-0.0792273	-0.209915	-0.198419	-0.22494	-0.138435	-0.129905	-0.135212	-0.120925	-0.0716706	-0.318223	-0.319787	0.120386	-0.297554	-0.409008	-0.331268	-0.341321	-0.345691	-0.318504	-0.483532	0.315535	0.408073	0.231342	0.0994789	-0.488332	-0.514967	0.881048	-0.587172	0.277689	-0.473319	-0.4542	-0.522213	-0.457207	0.297757	-0.0555732	-0.901536	0.55909	0.20586	-0.215527	-1.53822
ECD_00555	ferrienterobactin ABC transporter ATPase	-0.00271159	0.50083	0.438489	0.475571	1.06646	0.479311	0.481763	0.444549	0.317507	-0.0900045	0.777162	0.741485	0.696315	0.814495	0.81243	0.819574	0.846359	0.456331	1.06622	1.04072	1.07295	1.05048	0.961411	1.02804	1.0387	1.03801	1.07185	1.42652	-1.12012	-0.129529	0.897763	1.08056	2.2318	1.04044	1.06204	1.46955	0.0842837	1.04886	1.03779	1.03816	1.0939	1.06594	0.898207	0.115908	0.0574493	-1.87361	0.359556	0.181653
ECD_02289	glutamate-pyruvate aminotransferase; glutamic-pyruvic transaminase (GPT); alanine transaminase	0.287001	-0.628594	-0.690927	-0.665365	0.258876	-0.676758	-0.328988	-0.703958	-0.564185	0.086101	-0.903073	-0.640462	-0.393429	-0.874518	-0.869995	-0.846561	-0.859984	0.508215	-0.725469	-0.729335	-0.719849	-0.714457	-0.273966	-0.684306	-0.743088	-0.76378	-0.350621	-0.200199	0.432213	-0.12109	0.0853173	-1.05123	-1.08445	-0.804742	-1.08768	0.0510407	-0.12154	-1.07114	-1.08707	-0.760158	-1.07395	-1.08365	-0.454977	0.593021	0.911486	0.28877	-0.659819	0.494917
ECD_02826	hypothetical protein	0.849226	0.276706	0.163324	0.215371	-0.317216	0.213677	0.240647	0.194586	0.0865234	0.484187	0.110589	0.115147	0.0620104	0.181227	0.159692	0.19902	0.195359	1.00135	0.228346	0.221454	0.238035	0.255694	0.175955	0.224333	0.232228	0.210462	0.236595	1.86328	-0.893465	0.544227	-0.329329	-0.150895	-0.215815	-0.257082	-0.183372	-0.318447	0.257404	-0.20156	-0.185528	-0.212408	-0.152427	-0.208933	-0.309964	-0.448168	-2.64575	0.614761	0.084161	1.42266
ECD_02435	DoxX family inner membrane protein	0.282794	0.0281529	-0.0709282	0.203041	0.0650862	0.44781	-0.0210995	-0.0906398	-0.146667	0.368071	0.182073	0.191108	0.16166	0.265391	0.259514	0.262518	0.27682	-0.453475	0.6565	0.647358	0.655121	0.670537	1.20208	0.640032	0.652138	0.634737	0.665927	0.723752	0.478773	0.51459	-0.493519	-0.572009	-0.617113	-0.30815	-0.316227	-0.708553	-0.521025	-0.597813	-0.575553	-0.64726	-0.587285	-0.667552	-0.74502	-0.064835	2.011	0.550833	0.0285029	0.891375
ECD_01793	stress protein, member of the CspA-family	-0.634332	-1.54011	-1.58095	-1.53377	-1.81792	-1.5446	-1.53467	-1.60068	-1.62826	-0.146446	-1.62514	-1.649	-1.61446	-1.6129	-1.57061	-1.53607	-1.57504	-0.232751	-2.10077	-2.10936	-2.08883	-2.08264	-2.10457	-2.11318	-2.13562	-2.12499	-1.56182	-2.20734	0.306368	-0.54701	-0.34359	-2.21332	-2.24214	-2.23441	-2.22582	-1.50802	0.042196	-2.22955	-2.2096	0.0300644	-2.23819	-2.24926	-1.40559	0.211601	0.540529	0.611073	-1.71933	-0.347406
ECD_01844	TMAO reductase III (TorYZ), cytochrome c-type subunit	-0.015617	-1.3226	-1.36913	-1.31417	-1.5974	-0.370224	-1.33349	-1.38035	-1.41209	0.0883563	-1.48317	-1.46858	-1.50929	-1.47756	-1.46537	-1.42934	-1.45736	-0.122561	-1.04301	-1.05161	-1.04047	-1.01537	-1.05146	-1.04635	0.147251	-1.06836	-0.414369	-0.0417761	0.417747	-0.036599	0.155695	-1.59686	-1.59885	-1.59459	-1.59167	-0.129129	-0.111413	-1.61263	-1.60266	-1.63553	-1.59807	-1.62558	-1.69824	1.57528	0.408412	-0.0106693	-1.52205	1.15025
ECD_01815	exodeoxyribonuclease 10; DNA exonuclease X	0.110289	0.278076	0.237122	0.294535	-0.019628	0.400284	0.254349	0.394255	0.172461	0.306547	0.913365	1.18341	0.867841	0.940109	0.938637	0.946826	0.977303	-0.0343154	0.256243	0.231644	0.247879	0.260454	0.402477	0.236287	0.234883	0.229919	0.263479	0.231634	-0.832777	-0.280596	0.102404	0.493264	0.462122	0.811884	0.50529	0.439286	0.195268	0.471153	0.471434	0.452536	0.471441	0.62156	0.415897	-1.24174	-1.15394	-0.266188	0.585328	0.373483
ECD_02018	galactitol-specific enzyme IIC component of PTS	0.0925366	-1.38413	-1.44718	-0.780778	-1.00906	-0.596951	4.42885	-1.44113	-1.51413	0.208226	-0.869466	-0.87101	-0.917941	-0.832538	-0.836632	-0.800446	-0.85169	0.00788619	-1.52476	-1.55308	-1.51557	-1.51666	-1.56023	-1.54474	-1.20611	-1.54686	-1.19118	-1.32369	0.0166136	0.151779	0.49078	1.09085	-0.561092	-0.590757	-0.20839	0.0530111	0.128586	-0.532258	-0.569808	-0.127037	-0.5173	-0.587399	-0.0850206	0.952345	1.37006	1.10301	-1.08781	0.735327
ECD_03086	sialic acid-inducible nan operon repressor	0.328991	2.17251	2.08819	2.11129	1.68834	2.12283	2.10198	2.01994	1.9335	-0.22936	1.59481	1.25787	1.17762	1.3393	1.32479	1.36453	1.366	-0.111399	1.67853	1.65661	1.6526	1.66771	1.52896	1.65565	1.63122	1.64454	1.61363	1.95675	-0.0811601	-0.0572391	-0.493134	1.72269	1.67566	1.54967	1.66371	1.40158	-0.589645	1.69252	1.80298	2.701	1.75461	1.66084	2.03271	-1.73124	0.752291	-0.0855166	1.72977	1.2764
ECD_02454	phosphatidylglycerophosphatase C, membrane bound	-0.12754	-0.660199	-0.773488	-0.719196	-0.0993303	-0.100371	-0.711784	-0.804784	-0.826419	-0.434679	-0.638647	-0.634908	-0.654693	-0.566199	-0.566291	-0.544687	-0.55356	-0.212016	-0.853388	-0.855325	-0.848362	-0.829621	-0.934165	-0.863526	-0.87143	-0.880202	-0.850791	-1.01227	0.291141	0.152046	-0.150464	-0.863267	-0.908114	-0.927591	-0.877534	-0.545991	-0.117548	-0.887206	-0.866999	-0.935817	-0.878537	-0.931839	-1.04052	0.185265	-3.28154	0.590956	-0.36092	-1.15796
ECD_00233	xanthine phosphoribosyltransferase; xanthine-guanine phosphoribosyltransferase	-0.105525	0.699102	0.309508	0.321065	0.5036	0.322239	0.334895	0.279672	0.696646	0.0974715	0.266564	1.09095	0.205255	0.356607	0.350658	0.349425	0.374612	-0.180802	0.509912	0.513586	0.514132	1.15773	0.425684	0.511868	0.475487	0.473922	0.475077	0.221657	0.49682	-0.148085	-0.0917405	-0.168838	-0.207222	-0.232118	0.8108	-0.0222357	-0.147185	4.40518	-0.229385	-0.259868	-0.145924	-0.249438	0.292947	0.447669	1.63394	0.0374903	0.153517	0.920938
ECD_00672	putative allophanate hydrolase, subunit 2	-0.366951	0.00966905	-0.275226	0.0120915	0.0898583	-0.265004	-0.240583	-0.319856	-0.0860261	0.0994399	-0.2196	-0.240191	3.21331	-0.17958	-0.184334	-0.175015	-0.158563	0.166675	-0.229431	-0.242314	-0.247123	-0.245589	0.305398	-0.258696	-0.322948	-0.286526	-0.279638	-0.18543	0.199112	-0.235194	-0.00510228	-0.119162	-0.107609	-0.14465	-0.101313	-0.144527	0.304186	-0.103834	0.119477	0.103843	0.109216	-0.128821	0.070523	0.335839	-2.57759	-0.55675	-0.120508	0.440533
ECD_02507	toxic UPF0083 family protein inhibitor of 70S ribosome formation	-0.242764	4.39349	4.3375	4.29851	3.67761	4.38899	4.23584	4.18917	4.15646	-4.15306	2.05831	2.06394	2.01212	2.14022	2.13203	2.11889	2.18552	-1.97057	2.82436	2.79212	2.78406	2.79448	2.71624	2.79141	2.82326	2.80443	2.83099	2.63462	-0.188866	0.583007	-3.7391	1.12317	1.07912	1.04376	1.96581	0.997027	-2.02885	1.07935	1.09258	1.03546	1.10756	1.08478	0.920301	-1.36466	-1.71639	-1.29284	1.00355	-0.351661
ECD_00245	PaoABC aldehyde oxidoreductase, 2Fe-2S subunit	0.446722	0.010634	-0.036825	-0.0206001	0.20755	-0.012818	-0.00765618	0.881614	-0.226112	0.213891	0.601868	0.0699967	-0.00766995	0.115083	0.111979	0.132281	0.565484	0.260842	0.109788	0.105617	0.115245	0.129643	0.0245476	0.10364	0.0763609	0.391567	0.486642	-0.193972	0.158985	0.00699823	0.210313	-0.0104499	-0.0624325	-0.0637949	-0.0430852	-0.21335	-0.202938	-0.0286297	0.554933	0.755376	0.0133794	0.19267	0.377604	-0.78112	0.121853	-0.785872	4.38483	-0.191103
ECD_02168	anaerobic sn-glycerol-3-phosphate dehydrogenase membrane anchor subunit	-0.0715312	0.677053	0.60615	0.641797	0.62113	0.639872	0.65895	0.619085	0.507365	0.75018	0.954096	0.94037	0.888113	0.990005	0.980755	0.994303	1.01112	0.0440429	0.426834	0.415675	0.43	0.410144	0.546315	0.385548	1.13986	0.379006	0.447288	0.238752	-0.124684	-0.950704	-0.66264	0.406902	0.371069	0.373189	0.380869	0.326728	-0.004757	0.382751	0.321438	0.342764	0.38348	0.393073	0.272845	0.0410099	1.6009	-0.312847	0.551149	0.312284
ECD_00750	molybdopterin biosynthesis, protein C	-0.072221	-0.862007	-0.918437	-0.877114	-1.31618	-0.909426	-0.856548	-0.940548	-1.03271	0.215854	-0.747703	-0.788058	-0.821339	-0.733499	-0.746003	-0.721571	-0.727082	0.0656168	-0.700802	-0.701611	-0.704942	-0.689314	-0.424275	-0.707767	-0.744016	-0.733445	-0.718184	0.289009	-0.174702	-0.0887833	0.104485	-0.938049	-0.955301	-1.01158	-0.704498	-0.983899	0.127097	-0.95611	-0.974115	-0.970284	-0.919367	-0.538737	-0.606486	0.628731	-3.20755	-0.233386	-1.11367	-1.42084
ECD_00658	Rhs protein with putative toxin domain; putative neighboring cell growth inhibitor	-0.0972068	-0.186705	-0.223853	-0.188991	4.38022	-0.205099	-0.179662	-0.267824	-0.363558	0.480125	0.553598	3.42463	0.48455	0.59837	0.607635	0.593783	0.644068	-0.0802261	0.299303	0.281063	0.283841	0.283209	0.171725	0.272336	0.232879	0.261583	0.25864	0.0456299	-0.121482	-0.970639	0.5525	-0.223977	-0.203137	-0.2567	-0.213469	-0.261995	-0.0137193	-0.197915	-0.219814	-0.247342	-0.178952	-0.230566	0.424127	1.05807	0.886521	-0.00215518	0.335512	0.389073
ECD_03794	superoxide dismutase, Mn	0.0255726	-0.0959117	-0.340048	-0.260491	-0.766568	-0.306848	-0.16138	-0.331328	0.0069508	0.125055	3.61155	-0.0487918	-0.131656	0.0439899	0.0486817	0.0466542	0.0379298	-0.625468	-0.244789	-0.28041	-0.250583	-0.258351	-0.302164	-0.280341	-0.185657	-0.347163	-0.0994683	-0.391022	0.0705621	-0.101163	-0.205159	-0.458328	-0.509571	-0.436882	-0.511834	0.507442	-0.00368727	-0.498996	0.133409	-0.255439	-0.414269	-0.502383	-0.0994659	-0.750217	-0.855574	0.129186	-0.517928	0.301327
ECD_02178	putative LPS core heptose(II)-phosphate phosphatase	-0.181388	-1.64639	-1.64491	-1.95295	-1.50998	-1.97268	-1.92116	-1.9736	-2.08414	0.0584508	-1.0316	-2.03275	-1.63592	1.80204	-2.0152	-1.97863	-2.01509	0.16437	-1.90236	-1.90676	-1.8925	-1.91437	-1.96316	-1.91632	-1.91436	-1.33196	-1.89154	-1.38408	0.36249	0.230194	0.213934	-2.06691	-1.62542	-1.68007	-1.66872	-0.674804	0.175612	-0.903362	-2.13919	-1.24686	-2.07872	-1.62236	-2.20107	1.47158	0.49092	-0.483889	-1.31771	0.428754
ECD_04038	delta(2)-isopentenylpyrophosphate tRNA-adenosine transferase	-0.193503	2.92359	2.84128	2.86952	1.81327	2.87305	2.87886	2.80259	2.65469	-4.31217	2.73931	2.68055	2.58422	2.85349	2.84342	2.81548	2.89549	-2.68059	3.77853	3.74829	3.75445	3.7135	3.55601	3.71432	3.76681	3.72557	3.70415	3.17183	-0.632839	-0.0804855	-2.06056	2.11254	2.10722	1.89226	2.06953	1.80347	-2.54586	2.11282	2.02012	1.97551	2.21415	2.13134	1.88832	-3.42242	-0.266224	-2.22362	1.11296	4.37399
ECD_04122	GNAT family putative N-acetyltransferase	0.0887022	0.826786	1.30402	0.75988	0.188073	0.746303	0.777361	0.711584	0.548678	-0.357085	0.75648	1.06387	0.647251	0.851042	0.902497	0.889474	0.926206	0.153674	0.758005	0.738186	0.731614	0.7463	0.672496	0.733252	0.911041	0.704741	0.704065	0.263756	0.0905455	0.437604	0.0851585	1.33474	0.510577	0.345908	0.450963	0.84317	0.142128	0.522653	0.806668	0.503124	0.592953	0.492559	0.355188	-0.401232	-3.1616	-0.564414	0.555664	-0.469035
ECD_00461	putative allantoin transporter	0.286568	-0.21548	-0.276694	-0.244398	0.121262	-0.249338	-0.238231	-0.288333	-0.355768	0.132555	0.0723477	-0.603357	-0.634373	-0.560981	-0.537569	-0.520519	-0.523517	0.151598	-0.178063	-0.182763	-0.173145	-0.16333	-0.194037	-0.184727	-0.227868	-0.12368	0.192439	0.436626	0.599405	-0.244002	0.501614	-0.322004	-0.311905	-0.361025	-0.339424	-0.393756	0.117223	-0.296737	-0.316421	-0.226811	-0.284698	-0.311354	-0.481002	0.195164	0.270784	0.464456	-0.571086	0.0201427
ECD_02582	uncharacterized protein	-0.107534	0.18079	0.116478	0.149847	-0.450823	0.169845	0.158846	0.122767	0.0121327	-0.14772	0.0630144	0.0494982	0.0140296	0.110854	0.102338	0.127296	0.132949	-0.298584	0.232742	0.229864	0.235228	0.242219	0.160516	0.227926	0.188121	0.204112	0.275089	0.49514	0.0459173	-0.136445	-0.0264574	0.280317	0.25379	0.260153	0.266156	0.163307	-0.0702611	0.269387	0.254679	0.22267	0.304172	0.435563	0.0715022	0.339766	1.79235	0.351263	0.447361	0.415734
ECD_00971	23S rRNA m(5)C1962 methyltransferase, SAM-dependent	0.309665	0.122332	0.0420408	0.0601363	-0.0659094	0.601501	0.0924061	0.0211107	-0.0422294	-0.165144	0.433837	-0.172392	0.192273	-0.133063	-0.141755	-0.123303	-0.148275	-0.0104946	-0.0697289	-0.0978108	-0.0636031	-0.0480154	0.269502	-0.0752443	-0.100677	-0.0886492	-0.068699	-0.243549	-0.0281901	0.00700815	-0.178829	0.226958	0.177879	0.282588	0.325777	0.435923	0.370253	0.164817	0.152718	0.26935	0.183446	0.198	0.210742	0.111787	1.60517	0.438069	0.0233601	0.0526371
ECD_00857	ribosomal protein S6 modification protein	-0.0740411	-0.875124	-0.949193	-0.911113	-0.692897	-0.909826	-0.899838	-0.950734	-1.0026	-0.134146	-0.861699	-0.848564	-0.897074	-0.842205	-0.846625	-0.821251	-0.838053	0.214863	-1.06438	-1.06482	-1.06275	-1.04938	-0.626459	-1.06734	-1.10367	-1.08754	-1.07584	-1.26257	-0.12173	-0.706481	-0.489322	-1.27138	-1.32136	-1.3626	-1.2677	-0.566481	-0.111107	-1.33878	-1.33115	2.46998	-1.31448	-1.3043	-1.4245	1.07708	-2.87766	0.400247	-0.909507	-0.667125
ECD_02112	bicyclomycin/cysteine/sulfonamide efflux transporter	-0.0413095	-0.635179	-0.728801	-0.671582	-0.369637	-0.679733	-0.676631	-0.722329	-0.478161	-0.212978	-0.383981	-0.391863	-0.426939	-0.368511	-0.373835	-0.350359	-0.356051	0.149284	-0.319106	-0.33547	-0.314156	-0.345678	-0.401543	-0.32574	-0.334368	-0.340529	-0.168173	-0.216399	-0.565195	-0.124054	-0.144902	-0.577644	-0.601185	-0.628108	-0.585953	-0.662146	-0.0349453	-0.583917	2.15302	-0.631356	-0.590324	-0.600081	-0.0616819	-0.544778	-2.43614	-0.287164	-0.448647	0.243483
ECD_02401	exonuclease VII, large subunit	-0.323498	0.0684458	-0.0179346	0.0261777	0.325444	0.46983	0.501906	-0.0372204	0.371136	-0.994807	0.176994	0.18909	0.150102	0.215694	0.213966	0.228793	0.237576	-0.277215	0.273015	0.267391	0.276591	0.29309	0.169529	0.256062	0.248049	0.240555	0.280965	0.0556952	0.392458	-0.392256	-0.689458	0.0883225	0.0542686	0.28811	0.0742895	-0.0306936	-0.580781	0.0627134	0.29753	0.614013	0.0826971	-0.00594273	1.62708	-1.74365	-2.52893	0.699435	0.05244	-0.104616
ECD_03468	glutaredoxin 3	0.0303077	-2.27821	3.8434	-2.30898	-0.463115	-1.29348	-2.28063	-1.289	4.32337	-0.1841	-1.38765	-2.48796	-2.59399	-2.34523	-2.34863	-2.31916	-2.34894	0.0175996	-2.20885	-2.21943	-2.21995	-2.20176	-2.46613	-2.23506	-1.50112	-2.31886	-2.4434	-0.969147	0.13906	0.289252	0.0711608	-2.66563	-1.16959	-1.57442	-2.87361	-1.39562	0.238178	-1.58442	-0.507499	-0.908307	-2.55111	-2.6713	-1.3509	0.189376	0.368049	-0.318362	-1.31058	-0.922883
ECD_00440	PHB domain membrane-anchored putative protease	0.349916	0.0760612	0.0121554	0.0565197	-0.572296	0.0542217	0.303947	0.0162585	0.598889	0.0806685	-0.197158	-0.232323	-0.258874	-0.167851	-0.15734	-0.144864	-0.136695	0.0517598	-0.313491	-0.323	-0.313429	-0.29697	-0.0986846	-0.31639	-0.377456	-0.351279	-0.343557	-0.0163829	0.0124554	0.0628335	-0.0438568	4.32237	-0.261465	0.388231	-0.263828	-0.34804	0.0387022	-0.255097	-0.254206	-0.00420944	-0.229176	0.0451346	-0.252479	-0.0737597	-0.333183	-0.129537	-0.402135	-0.676338
ECD_00974	Modulator of FtsH protease, inner membrane protein	0.30785	0.223812	0.147101	0.159577	0.170976	0.196911	0.197497	0.124534	0.062314	-0.0489198	-0.312521	-0.290655	-0.325867	-0.265436	-0.274849	-0.257478	-0.268086	-0.412109	-0.263143	-0.277855	-0.256943	-0.248991	0.0480608	-0.268573	-0.308093	-0.282785	-0.276071	-0.447653	-0.296341	-0.0168407	0.14989	-0.389907	-0.437602	-0.471896	-0.365846	0.0384476	-0.387703	-0.439269	-0.455313	-0.455082	-0.433298	0.0223812	-0.561971	0.0107193	0.00908293	-0.526778	-0.532524	0.40246
ECD_01300	aromatic amino acid biosynthesis and transport regulon transcriptional regulator; autorepressor; ATPase; phosphatase	0.612059	4.31994	0.399294	0.417906	0.477512	0.410662	0.452952	0.379191	0.323088	0.349488	0.399725	0.762622	0.368139	0.421793	0.416227	0.430967	0.43822	0.22312	0.045457	0.0419553	0.0559513	0.0683966	0.0177941	0.0443865	0.051859	0.0259136	0.0641622	0.475414	0.202774	-0.148112	-0.553744	-0.0810756	-0.151391	0.43449	0.521255	-0.21232	-0.564574	-0.161067	-0.112545	-0.0885545	-0.105414	0.172062	0.140914	0.118264	1.04838	1.08374	0.337112	0.857928
ECD_02423	isc operon transcriptional repressor; suf operon transcriptional activator; oxidative stress- and iron starvation-inducible; autorepressor	0.0150974	-1.23205	-1.87189	-1.81865	-1.18283	-1.53199	-1.14322	-1.29387	-1.55374	0.150403	-1.89141	-1.88696	-1.90728	-1.84238	-1.81172	-1.8211	-1.81499	0.613491	-1.40084	-1.40782	-1.40042	-1.38401	-1.3791	-1.41542	-1.38008	-1.43063	-1.39358	-1.29812	0.342711	-0.425864	0.0140453	-1.64398	-1.82507	-1.80221	-1.2018	-1.2778	0.157599	-1.98406	-1.9683	-1.44536	-1.96986	-1.86145	-1.85017	1.22028	0.0120569	-0.56872	-1.37608	1.01367
ECD_04237	putative DUF2501 family periplasmic protein	0.0646029	-0.132433	-0.212197	-0.170439	-0.051279	0.102241	-0.171265	-0.258462	0.196471	0.119641	3.15625	0.592493	0.033732	-0.0788939	-0.0456279	-0.0628385	1.84908	-0.122744	0.0426407	0.0386804	0.0374975	0.0520248	-0.0799183	0.0302912	0.0100316	-0.00147199	0.00187557	-0.12214	0.11402	-0.0757455	0.447039	0.34347	0.120697	0.376472	1.02119	0.696743	0.230521	0.131978	0.261118	0.591418	0.18175	0.0848377	0.215924	0.00932946	-0.702558	0.00461445	0.0543157	0.157772
ECD_02825	Pyrophosphorylase	-1.05203	-0.117761	-0.220304	-0.176413	1.24397	-0.173422	-0.152983	-0.189922	-0.297198	0.847441	0.538791	0.546701	0.486853	0.61579	0.588789	0.628235	0.637569	0.0554247	0.237976	0.229028	0.245937	0.261223	0.173799	0.230477	0.244566	0.220915	0.697184	0.00129286	-0.328786	-0.496311	-0.0122042	0.85121	-0.173013	1.35515	-0.14639	-0.281947	-0.0963737	-0.159111	-0.143084	-0.182713	-0.110037	-0.167051	-0.270426	-0.28959	0.37587	0.706807	0.16106	1.13568
ECD_02255	N5-glutamine methyltransferase	-0.32838	0.0493482	0.104009	0.0180729	-0.488428	0.100414	0.0352253	-0.0422334	-0.127666	0.700436	0.276787	0.28004	0.20972	0.302756	0.299879	0.318285	0.63322	-0.0320624	0.0783069	0.0724871	0.0863156	0.821074	0.0271925	0.0625903	0.0783385	0.0584422	0.0938025	0.195925	0.528668	-0.0444479	-0.355554	-0.718703	-0.7423	-0.754587	-0.720481	-0.627937	-0.177712	-0.711381	-0.752524	-0.757151	-0.725711	-0.735866	-0.0351128	0.969763	1.05705	-0.443282	-0.154575	-0.791483
ECD_03902	phosphate starvation inducible protein	-0.551727	-0.772754	-0.859708	-0.793451	-1.26295	-0.839328	-0.842581	0.117542	-1.00415	-0.479852	-0.903621	-0.914784	-0.990323	-0.874115	-0.861436	-0.8585	-0.868874	-0.0224794	-1.05067	-1.07695	-1.07028	-1.06898	-1.2338	-1.07929	-1.13622	0.214607	-0.350762	-0.0362371	0.119679	0.0951105	-0.22985	0.181015	-0.642264	0.0380089	-1.22876	-1.51595	0.159298	-1.11326	-1.23031	0.149232	-1.05754	-1.18942	-1.35531	-0.350498	1.04847	-0.0300529	-1.12903	-0.0311565
ECD_03473	LPS(HepIII)-glucuronic acid glycosyltransferase	-0.0193767	-0.401537	-0.603551	-0.43216	-0.313078	-0.404227	-0.404234	-0.368212	-0.666717	-0.0626382	-0.743295	-0.770678	-0.959506	-0.669158	0.167664	-0.690281	-0.69689	-0.00843537	-0.615476	-0.488205	-0.509262	-0.616115	-0.402515	-0.644234	-0.617827	-0.725268	-0.725636	-0.159585	0.215248	0.0986899	0.0491739	-0.579754	-0.638504	-0.711133	-0.47637	-0.258562	-0.0947485	-0.457562	-0.274802	-0.615991	-0.72094	-0.760397	-0.656846	0.090885	-0.279476	-0.0795632	-0.661052	-0.1572
ECD_00392	HU, DNA-binding transcriptional regulator, beta subunit	0.214443	4.27928	0.202951	0.393387	-0.0417586	-0.100235	-0.113068	-0.148169	0.516828	0.313298	-0.471588	-0.250691	-0.221258	2.3701	-0.420966	-0.407343	-0.41713	-0.330352	-1.04583	-1.04687	-1.04705	-1.02109	-1.13088	-1.05065	-1.09924	-1.00943	-0.59686	-0.594151	-0.27427	-0.222222	-0.125845	-0.578312	0.00101679	-0.628173	-0.728186	-0.863647	-0.0313565	-0.731121	-0.75756	-0.32994	-0.672545	-0.74562	-0.908077	0.718464	0.496184	0.147015	-0.217449	0.314931
ECD_04278	uncharacterized protein	0.425355	-0.411196	-0.814865	-0.772614	0.202552	-0.792507	-0.772875	-0.860342	-0.610644	-0.00362709	-1.01495	-0.277721	0.210588	-0.935745	-0.902102	-0.917987	-0.882479	-0.0545055	-0.881981	-0.885583	-0.886862	-0.872185	-1.00442	-0.894018	-0.915271	-0.926368	-0.923181	-0.990119	-0.0938423	0.0889127	0.674307	-0.0138301	-0.835633	-0.0767197	0.108698	-0.324607	0.0439883	0.000250502	-0.935237	-0.96418	-0.7734	0.2851	-1.08753	0.980851	-1.34218	-0.468627	-0.4443	0.41395
ECD_02874	DUF2623 family protein	0.184572	-0.509932	-0.644818	-0.565107	-0.899402	0.0247767	-0.573073	-0.581028	-0.745225	-0.190498	-0.372561	-0.383677	-0.420274	-0.276516	-0.317717	-0.30445	-0.29618	0.0311902	-0.759826	-0.767982	-0.75756	-0.741404	-0.500111	-0.765264	-0.817554	-0.798748	-0.831894	-1.10761	-0.497073	-0.105595	0.259754	-0.275978	-0.335709	-0.447639	-0.353216	-0.234346	0.349791	-0.324452	-0.354533	-0.388919	-0.272913	-0.373437	-0.49275	0.412464	-3.72257	-0.814537	-0.249787	-0.821505
ECD_02525	DNA binding protein, nucleoid-associated	-0.00711385	0.776262	0.7013	0.730533	1.63469	0.726538	0.745728	0.65518	0.598106	0.518081	0.122001	0.122576	0.0729069	0.169379	0.17509	0.186458	0.190087	1.11052	0.874184	0.866006	0.867346	0.876951	1.61741	0.864355	0.840231	0.84458	0.872872	0.700253	-0.0541258	0.155064	-0.0180067	0.22904	0.18222	0.143058	1.46862	1.60307	-0.122745	0.189964	0.202543	0.161368	0.222047	0.199689	0.0271577	0.307384	-2.47008	-2.00183	0.240512	-1.09329
ECD_01619	transcriptional repressor for the nemRA-gloA operon, quinone-, glyoxal-, and HOCl-activated	0.36853	-0.670567	-0.701569	-0.633713	-0.937114	-0.690558	-0.662741	-0.732111	-0.415892	-0.0207714	-0.821388	-0.816919	-0.833163	-0.801351	-0.796339	-0.770021	-0.788426	0.238445	-0.959652	-0.939063	-0.92963	-0.937781	-1.00926	-0.94899	-0.959725	-0.978741	-0.950969	-0.816662	0.288685	0.343083	0.052883	-0.42918	-0.513869	-0.494844	-0.479189	-0.551843	0.69653	-0.465008	-0.471413	-0.506994	-0.452581	-0.541095	-0.54894	1.80829	3.31727	0.121726	-0.795172	0.655295
ECD_02444	fused nitric oxide dioxygenase/dihydropteridine reductase 2	-0.0382708	-0.741548	-0.849334	-0.799425	-0.363539	-0.799304	-0.778922	-0.873277	0.488992	0.356744	4.2421	-0.386037	-0.406839	-0.316795	-0.320136	-0.298715	-0.301713	0.119592	-0.537634	-0.541777	-0.534706	-0.517858	-0.346114	-0.548678	-0.55076	-0.565123	-0.530585	-0.0707544	0.144278	0.0958435	0.205309	-0.619514	-0.664741	-0.683614	-0.564443	0.0995811	-0.165067	-0.64413	-0.624177	-0.694564	-0.634882	-0.688108	-0.792742	-0.0107434	0.0725933	-0.276027	-0.68888	-0.911077
ECD_01900	nicotinate-nucleotide--dimethylbenzimidazole phosphoribosyltransferase	0.258509	-0.523775	-0.0907503	-0.515762	-0.849438	-0.534233	-0.546342	-0.573071	-0.641807	0.830407	0.448067	0.450302	0.403467	0.478952	0.469596	0.485708	0.500374	-0.357008	-0.181461	-0.220145	-0.20997	-0.185201	-0.208172	-0.201683	-0.201666	-0.205885	-0.193638	-0.364984	-0.124445	0.448269	0.14166	-0.42884	-0.43441	-0.468198	-0.446958	-0.475971	-0.322874	-0.414387	-0.454375	-0.481062	-0.397429	-0.489564	-0.0834376	-0.885	1.68281	-2.68669	-0.249697	-1.23082
ECD_01614	putative membrane fusion protein (MFP) of YdhJK efflux pump	-0.298486	0.407435	0.377173	0.397608	0.738032	0.386971	0.410069	0.333389	0.314417	-0.274397	0.0755376	0.0790499	0.0574998	0.0966172	0.0970099	0.122297	0.106756	-0.171521	4.21897	-0.0681272	-0.058454	-0.0589575	-0.119788	-0.0700313	-0.0776329	-0.097788	-0.0552689	-0.184674	-0.380343	-0.663916	-1.31193	0.515378	0.41247	0.916759	0.475177	1.03607	-0.104067	0.495176	0.446308	0.450628	0.495995	0.427823	0.411027	-0.733933	2.50417	-1.47173	0.392099	-0.33495
ECD_02670	exonuclease V (RecBCD complex), gamma chain	-0.105872	2.89295	2.72478	2.83179	2.10181	2.91474	2.78376	2.76816	2.57289	-0.172436	2.09516	2.09632	2.02174	2.18818	2.16465	2.16196	2.22625	-0.426707	1.47955	1.46021	1.4674	1.45	1.46061	1.46474	1.4493	1.44422	1.46485	1.20158	-0.746267	0.182309	-0.531649	1.56593	1.5199	1.44676	1.51879	1.41555	-0.236759	1.53069	1.57864	1.44747	1.55864	1.51734	2.07397	-0.555554	-0.0756062	1.65164	2.28474	2.49201
ECD_00912	5-enolpyruvylshikimate-3-phosphate synthetase	-0.213071	0.945218	0.880505	0.89875	0.988241	0.935559	0.934284	0.867998	0.811119	-0.347427	0.482415	0.854764	0.448675	0.519305	0.511409	0.523531	0.533414	0.397891	0.742617	0.701046	0.738811	0.725883	0.644574	0.732414	0.711437	0.726722	0.720181	0.809212	0.192059	0.325173	-0.163573	0.31059	0.264564	0.557886	0.328374	0.434686	0.0875059	0.266659	0.251963	0.464349	0.296122	0.379731	0.525181	-1.08083	0.71848	-0.68967	0.616636	0.441042
ECD_03031	polynucleotide phosphorylase/polyadenylase	-0.139319	2.11593	2.12374	2.07561	1.34061	2.05641	2.06656	2.1664	1.90459	-1.06637	1.62023	1.62931	1.51122	1.71584	1.70585	2.99696	1.91394	-0.674718	1.47875	1.42953	1.43611	1.46003	1.38202	1.43533	1.42939	1.41802	1.41248	1.18577	-0.698847	-0.286002	-0.28407	1.64578	1.61957	1.37101	1.50353	1.35266	-0.675441	1.49728	1.6251	1.39509	1.56231	1.48375	1.33234	-0.621764	0.930856	-0.749985	1.57164	2.46177
ECD_02336	coproporphyrinogen III oxidase	-0.352609	-0.159799	-0.235356	-0.189577	-0.435004	-0.216629	0.0662085	0.112337	-0.318733	-0.17028	0.0198904	0.0512203	-0.0271964	0.069121	0.0784261	0.0980757	0.101253	-0.0502048	0.208226	0.197155	0.200445	0.210895	0.105284	0.180443	0.188533	0.17728	0.221334	0.0491006	-0.197316	0.139626	0.179806	0.159405	0.290312	0.0821734	0.129613	0.0813069	0.0251226	0.151604	0.126715	0.0962048	0.159199	0.114051	0.521141	0.0126091	0.953335	0.0877993	0.410556	0.0282947
ECD_02428	putative 3-phenylpropionic transporter	-0.0524781	0.678558	0.582455	0.635497	0.593312	0.644527	0.645182	0.734897	0.710072	0.21398	1.00049	1.01661	4.20071	1.09543	1.09393	1.07335	1.12297	0.0561756	0.890375	0.875971	0.884131	0.896279	1.19265	0.870305	0.892852	0.869247	1.24613	1.01379	-0.118941	-0.280475	-0.212922	0.836124	0.785582	1.02121	0.809271	0.709545	0.136534	0.799798	0.810118	0.748792	0.819289	0.739378	1.10194	0.485577	-0.750368	-0.167516	0.641131	1.25402
ECD_02873	hydrogenase 2, small subunit	0.307737	0.777236	0.632864	0.721058	0.491719	0.721865	1.25557	0.696432	0.535822	-0.0407133	0.678124	0.679872	0.640344	0.790463	0.747165	0.755981	0.773846	0.133113	0.667311	0.650977	0.661131	0.675241	0.720711	0.65789	0.619111	0.63096	0.596644	0.35708	0.490574	-0.309134	0.0652977	0.896753	0.83512	0.703721	0.824412	0.720613	0.426808	0.942987	1.00566	0.976387	0.897156	0.978426	0.966364	0.266684	-1.58166	-0.457194	0.282037	-1.23411
ECD_00745	dethiobiotin synthetase	-0.030081	0.499523	0.459085	0.485987	0.312484	0.465593	0.498345	0.419275	0.323906	-0.172764	0.451091	0.419107	0.359661	0.488903	0.477969	0.461256	0.510476	-0.0461233	0.869669	0.858241	0.848974	0.854668	0.719475	0.839505	0.827571	0.828901	0.845032	0.608844	0.287351	-0.0985868	0.147811	0.629592	0.620078	0.844743	0.677201	1.01331	0.244645	0.616753	0.761361	0.571754	0.652918	0.626009	0.461314	0.0340784	0.313745	0.569034	0.40438	-0.0910444
ECD_02071	LrgB family inner membrane protein	0.303265	4.04419	-0.0828434	-0.0361737	-0.0857833	-0.0187877	-0.0379558	-0.0749054	-0.162517	0.550866	0.129186	0.127518	0.0892721	0.148634	0.147158	0.167204	0.156311	0.0913331	0.20256	0.193432	0.205849	0.419246	0.122497	0.194342	0.170724	0.184864	0.190986	0.199177	0.373322	-0.0826163	-0.0874889	0.130033	0.134928	0.0833633	0.141133	0.0824131	-0.154701	0.153612	0.131404	0.0838332	0.16001	0.0989406	0.455357	-0.199506	1.04686	0.758469	0.406695	0.773758
ECD_02574	hydrogenase 3, Fe-S subunit	-0.276433	0.00343508	1.94445	0.212046	0.0384202	-0.0155875	-0.00694267	-0.0557048	0.0570106	-0.384241	0.0821374	4.17506	0.0357746	0.129407	0.121377	0.147111	0.142611	0.0496761	0.179924	0.174853	0.182681	0.187859	0.108066	0.173157	0.13888	0.271199	0.43855	0.0679767	-0.175325	-0.125894	0.0134164	0.224933	0.192837	0.162284	0.275461	0.144612	0.169959	0.204722	0.186947	0.154812	0.237485	0.192279	0.568683	0.213947	-1.00188	0.464694	0.107812	-0.25483
ECD_01391	BenE family inner membrane putative transporter	0.310278	0.368693	0.159004	0.183733	0.838568	0.166469	0.203211	0.125043	0.0920223	0.778806	1.10305	0.612458	0.584232	0.64491	0.640523	0.649947	0.65286	-0.086209	0.4097	0.4249	0.434827	0.428858	0.407547	0.423226	1.00164	0.394021	0.437494	0.37088	0.0697303	0.0935778	-0.25161	0.299785	0.226756	0.230876	0.896556	0.141875	0.288115	0.243625	0.262932	0.268517	0.268515	0.24052	0.231168	0.937667	2.20775	0.188265	0.294432	-0.54467
ECD_00494	DLP12 prophage; putative recombinase	-0.465349	0.171761	0.120976	0.132	0.485675	0.137941	0.154873	0.10298	0.0469574	0.07157	0.0335503	0.0159643	-0.0155792	0.0536745	0.0503527	0.0734174	0.0813276	0.694949	0.722372	0.705167	0.729711	0.724682	0.658503	0.701412	0.73141	0.717834	0.762008	1.02362	-1.18706	-0.684145	-0.79692	0.0253793	-0.0164025	0.0229358	0.0315885	0.0114121	0.488292	0.0104291	0.0184912	0.0281628	0.0648903	0.0562035	-0.0821539	0.935368	-1.98506	-0.0485786	0.416145	1.64932
ECD_03295	stable heat shock chaperone	-0.0909776	-0.977775	-1.07465	-0.10917	0.161141	-1.01472	-0.998084	-1.11787	0.236157	-0.116799	-0.294015	-0.899368	0.304167	-0.802992	-0.802017	-0.7754	-0.797347	0.147464	-0.904351	-0.906322	-0.873741	-0.444068	-1.09228	-0.923207	-0.128674	-0.949734	-0.653092	-0.284322	0.106177	-0.0947222	-0.49316	-1.47703	-0.476163	-0.677005	-1.57289	-1.23746	-0.143519	-1.46574	-1.56915	-0.949853	-1.35918	-0.809186	-1.74818	-1.0331	-1.5457	0.732032	0.378642	0.121287
ECD_00560	isochorismate synthase 1	-0.211045	-0.380659	-0.221716	-0.404311	0.75328	-0.40479	-0.394418	-0.436371	-0.560528	0.118397	-0.230451	-0.23694	-0.310354	-0.175633	-0.170125	-0.159384	-0.148172	-0.0423935	-0.249964	-0.262211	-0.250436	-0.244075	-0.125662	-0.271647	-0.292481	-0.273768	-0.080377	0.143253	-0.0104637	0.245224	0.00199153	-0.207899	-0.225795	-0.27375	-0.126419	-0.354497	0.157834	-0.441066	-0.443549	0.551992	-0.408869	-0.436534	-0.0285419	0.0147544	0.744675	0.0731452	-0.400657	-0.273164
ECD_00513	hypothetical protein	-0.544227	-0.652973	-0.713327	-0.681419	-0.573239	-0.690352	-0.670868	4.12271	-0.210202	0.338083	-0.639338	-0.660195	-0.698788	-0.610606	-0.612804	-0.595415	-0.58769	-0.094409	-1.08586	-1.09427	-1.07847	-1.08647	-1.17353	-1.10004	-1.13369	-1.11154	-1.08076	-1.3694	-0.0342174	-0.841178	-0.0717062	-0.72448	-0.769172	-0.4216	-0.0342337	-0.102812	0.327152	-0.744306	-0.732307	-0.752609	-0.685878	-0.718833	-0.905832	-0.745931	0.390779	-0.372933	-1.2218	-1.84043
ECD_00911	3-phosphoserine/phosphohydroxythreonine aminotransferase	-0.852917	-0.815203	-0.885902	-0.858165	-1.01305	-0.516647	-0.641736	-0.710499	-0.804798	-0.348285	-0.357559	-0.335516	-0.381163	-0.321074	-0.325504	-0.313952	-0.315967	-0.0985755	-0.515246	-0.546157	-0.535883	-0.517951	-0.378068	-0.519689	-0.566854	-0.416389	-0.3333	-0.588349	-0.19242	0.170725	0.00220722	-0.870833	-0.739151	-0.946676	-0.856135	-0.541468	-0.253553	-0.571396	-0.914975	-0.0962727	-0.90875	-0.935098	-0.23329	0.904436	0.734516	-1.40354	-0.188451	4.11253
ECD_01266	DUF559 family endonuclease-related protein	-0.0981818	-0.026745	-0.0867641	-0.0824857	-0.223645	-0.0659879	-0.0270486	-0.0898155	-0.138653	-1.83691	0.198433	0.206213	0.168251	0.217406	0.214953	0.224058	0.24666	0.414321	-0.408378	-0.412645	-0.378901	-0.376396	0.86094	-0.39737	-0.397699	-0.431099	-0.396374	-0.459631	0.491713	-0.350804	-0.374391	0.346132	0.302603	0.352636	0.3626	0.343394	0.482238	0.309886	0.35841	0.384781	0.340097	0.363315	0.313339	-0.386046	4.11234	1.10942	0.569067	0.231804
ECD_01209	UPF0225 family protein	0.0221202	-0.225233	-0.332184	-0.315595	-0.607847	-0.302403	-0.207244	-0.305691	-0.365961	-0.0900789	-0.24933	-0.232711	-0.282119	-0.21503	-0.223395	-0.220699	-0.211536	-0.822354	-0.642944	-0.646131	-0.636774	0.044053	-0.718451	-0.645952	-0.660004	-0.668896	-0.642112	-0.770891	0.427069	-0.0759998	0.188464	-0.455165	-0.497758	-0.502857	-0.00174939	-0.524857	-0.0227868	-0.490786	-0.457821	-0.436347	-0.492418	-0.475125	-0.552842	-0.76301	0.308342	0.367372	-0.681314	0.597385
ECD_00295	putative cyanate transporter	0.223183	0.710545	0.636786	0.698774	0.203462	0.661616	0.699831	0.604519	1.05042	0.184233	0.59253	0.525701	0.516587	0.619882	0.6408	0.653947	0.660383	-0.291387	0.240511	0.241432	0.229712	0.247963	0.746296	0.440106	0.224951	0.514353	0.22724	0.194389	-0.146054	0.338383	-0.305812	0.834806	0.436071	0.845205	1.07194	0.294673	0.148009	0.486807	0.665447	0.709001	0.524642	0.742405	0.224365	-0.249001	1.17862	0.108704	0.243353	-1.20058
ECD_04279	putative methyltransferase	0.044965	-0.611286	-0.34042	-0.648561	-0.544034	-0.315787	-0.250808	-0.735497	-0.517929	0.0715751	-0.265294	-0.687499	-0.784276	-0.604252	-0.569374	-0.580701	-0.555656	0.304224	-0.646065	-0.648148	-0.649556	-0.634167	-0.766585	-0.656766	-0.682236	-0.6915	-0.688638	-1.14486	0.00427889	-0.252263	-0.0129805	-0.840069	-0.865557	-0.19456	-0.554004	-0.875949	-0.180013	-0.851302	-0.956307	-0.98458	-0.807511	-0.904446	-0.161744	-0.134004	-1.89399	1.59003	-0.36582	0.26667
ECD_00431	bifunctional UDP-sugar hydrolase/5'-nucleotidase	0.129259	0.0870787	0.027627	0.0631268	0.0514995	0.0632514	0.0527755	0.0166735	2.60468	0.114929	-0.0478632	-0.0787578	-0.0888513	-0.01316	-0.00516779	0.000714974	0.0196217	0.397639	0.118241	0.111872	0.12149	0.141573	0.304515	0.11541	0.0633199	0.0756548	0.0913005	-0.159337	0.491915	0.0833481	-0.32919	-0.320448	-0.366853	-0.1053	-0.357476	-0.0508667	0.104288	-0.352771	-0.358915	-0.390066	-0.325344	-0.136564	-0.233826	0.517502	0.75066	-0.278504	-0.00984924	-0.116973
ECD_00280	broad specificity NADPH-dependent aldehyde reductase, Zn-containing	-0.0898818	-0.284105	-0.330112	-0.283801	-0.102604	0.030238	-0.284957	-0.358933	1.15071	-0.239455	-0.407316	-0.451614	-0.478081	-0.358453	-0.353701	-0.332888	-0.338808	-0.0178597	-0.444883	-0.436133	-0.456415	-0.437259	-0.511668	-0.452969	-0.45457	-0.486056	-0.460977	0.568838	0.00596013	0.15729	0.050022	-0.473529	-0.557982	-0.561967	-0.538326	0.188879	0.174601	-0.518695	-0.549049	0.235874	-0.471783	0.0741384	0.587371	-0.117981	-1.63874	0.312649	-0.544887	-0.175299
ECD_03122	acrAB operon transcriptional repressor	-0.254097	-0.314855	-0.375134	-0.363909	-1.25947	-0.332176	-0.325834	-0.4158	0.184192	0.188277	1.0654	-0.629066	0.108089	-0.565352	-0.572668	-0.531833	-0.554557	-0.380938	-0.498249	-0.499223	-0.494285	-0.498323	-0.649709	-0.499804	-0.5502	-0.538253	-0.55353	-0.916115	-0.295006	-0.396007	-0.273868	-0.787067	-0.806885	-0.934595	-0.880898	-0.400084	0.120645	-0.817052	-0.883963	-0.939989	-0.757853	-0.820937	0.208167	-0.484319	1.29314	0.964923	1.46883	2.35569
ECD_01798	KDG regulon transcriptional repressor	0.50487	-0.293393	-0.336287	-0.292768	-0.585497	-0.291317	-0.301019	-0.356715	-0.0434082	0.0413699	-0.34331	-0.355756	-0.374901	-0.331625	-0.326724	-0.302861	-0.316045	0.386482	-0.0428761	-0.0787754	-0.0268951	-0.0625862	-0.064296	-0.0803447	-0.0684819	-0.0470102	-0.0437587	-0.160403	0.162128	-0.0997506	0.0217559	-0.633083	-0.661989	-0.212631	-0.636801	-0.720539	-0.234184	-0.410787	-0.636097	-0.669999	-0.428359	-0.650284	0.168777	0.645887	1.09889	-0.852754	-0.653377	-0.0868541
ECD_00538	mechanosensitive channel protein, miniconductance	-0.0401607	-0.261754	-0.0274127	-0.276067	0.385814	0.020913	-0.267851	-0.314602	-0.441581	-0.119474	-0.206336	-0.235028	-0.26983	-0.182813	-0.174054	-0.167951	-0.155844	-0.0864407	0.00192247	-0.00385096	0.011051	-0.00626119	0.4615	-0.00772536	-0.0360526	-0.0168538	0.0133963	0.175314	-0.129135	0.497614	-0.27677	-0.488524	-0.539183	-0.539423	-0.507405	0.0912039	-0.0203835	-0.50061	-0.145171	-0.152828	-0.444314	-0.0601692	0.225066	0.385634	0.484382	1.21557	0.465075	0.232573
ECD_00498	DLP12 prophage; conserved protein	0.144398	0.00519283	-0.0364332	0.658963	-0.2439	-0.0279009	4.07156	0.462861	-0.150713	-0.0289724	0.287338	0.25822	0.225518	0.304881	0.302152	0.320134	0.326199	-0.115822	0.294913	0.473186	0.302371	0.297208	0.410937	0.281051	0.406317	0.276989	0.302393	0.705317	0.617442	0.799044	-0.0902316	-0.186993	0.0743719	0.198509	-0.204688	-0.0435686	-0.292794	-0.202247	0.114257	-0.221458	-0.147541	-0.180471	0.164955	-0.290389	-0.205666	1.11611	0.164423	-0.280326
ECD_01975	Hsp70 chaperone family protein	0.470159	0.551988	0.48869	0.522165	0.180719	0.530477	0.509015	0.480494	0.401152	-0.0280253	1.09756	0.763588	0.698628	0.813376	0.804379	0.820841	0.812213	0.133941	-0.235223	-0.269329	-0.231175	-0.234944	-0.270465	-0.260281	-0.265986	-0.253272	-0.249427	0.174976	-0.401278	-0.404947	-0.446212	0.415464	-0.294023	0.135682	-0.283806	-0.320959	-0.103195	-0.272294	-0.176712	-0.308452	-0.25413	-0.340703	0.207489	-0.316302	0.299993	0.0545852	0.346382	0.293189
ECD_00430	putative fosmidomycin efflux system protein	0.0685886	-0.0256255	-0.0872138	-0.047466	-0.213261	-0.0528876	0.122529	-0.0899791	0.0727471	0.0732275	0.0266843	-0.00384385	-0.0103896	0.056708	0.0662912	0.0779481	0.0833729	0.0763803	0.175574	0.169955	0.411169	0.19997	0.0799079	0.173404	0.119228	0.132478	0.147989	0.127278	0.164933	0.478017	0.276825	0.509663	0.62676	0.428822	0.416159	0.124965	0.26221	0.214459	0.207124	0.173935	0.244268	0.227448	0.668149	0.113183	-0.661075	0.104498	-0.132839	-0.734966
ECD_00470	putative anaerobic allantoin catabolic oxamate carbamoyltransferase; DUF2877 family protein	0.388101	0.472703	0.413831	0.438812	0.710616	0.443101	0.436957	0.390214	1.0329	0.108097	0.414708	0.0176872	0.440596	0.0655289	0.0793562	0.0779481	0.102194	0.306395	0.384145	0.377679	0.389431	0.389533	0.299427	0.375931	0.342757	0.364425	0.384479	0.108154	-0.0520891	-0.0653782	-0.0730333	0.339008	0.367539	0.0850131	0.119594	0.211438	0.207718	0.141199	0.134806	0.099442	0.401989	0.383653	0.530871	-0.450056	0.516075	1.10442	0.0851436	0.108749
ECD_02106	resistance protein for phages lambda and N4, putative membrane-anchored cyclic-di-GMP phosphodiesterase	-0.3865	1.21931	1.15344	1.18484	1.03586	1.20716	1.18255	1.1441	1.04978	-0.432464	1.36941	1.35873	1.52485	1.39976	1.38988	1.39675	1.42894	0.195264	1.78455	1.75107	1.77242	1.73532	1.68151	1.75514	1.76614	1.77231	1.776	1.57614	0.373492	0.551508	-0.545969	1.26732	1.22285	1.2191	1.26942	1.1853	-0.573396	1.24191	1.22697	1.18992	1.24707	1.2431	1.26784	-0.16731	-0.546651	1.23811	1.08307	0.120889
ECD_02814	hypothetical protein	0.299659	-0.153826	0.348025	-0.214878	-0.89887	-0.228884	0.452367	-0.248739	-0.380335	-0.0281295	0.556179	-0.170263	-0.226475	-0.0950866	-0.119377	-0.0883639	-0.0875967	0.37044	-0.105482	-0.116737	-0.106648	-0.0954771	-0.198618	-0.115055	-0.137159	-0.130295	-0.11493	0.211397	0.254247	0.157681	-0.479514	-0.0167959	-0.085511	-0.167934	-0.0777327	-0.256011	-0.0521895	-0.0715691	-0.0807357	0.245388	-0.018517	-0.100923	0.262844	0.159938	1.1578	-0.160971	0.512426	0.587548
ECD_01916	UPF0394 family inner membrane protein	-0.0666075	0.412215	0.376868	0.416021	0.896295	0.414039	0.533424	0.357947	0.304084	0.568513	0.225614	0.22884	0.179436	0.248764	0.243134	0.26708	0.263369	0.130038	0.511189	0.466562	0.496308	0.713038	0.982157	0.499603	0.500762	0.491993	0.521417	0.530389	0.0723619	-0.31184	0.0107773	0.431222	0.390966	0.556626	0.417587	0.396811	0.087074	0.429994	0.37749	0.368984	0.441195	0.369793	0.298394	-0.621933	-0.925559	-0.0614571	0.72439	0.0290537
ECD_01610	anhydro-N-acetylmuramic acid kinase	0.0859231	-0.918248	-0.950695	-0.889297	-0.354539	-0.947462	-0.912905	-0.63	-1.01132	-0.341667	-1.16567	4.03687	-1.17885	-1.14982	-1.14754	2.78087	-1.14651	0.15997	-0.963745	-0.949231	-0.939977	-0.939039	-0.771926	-0.951523	-0.967948	-0.984315	-0.94267	-1.07026	-0.470548	-0.0735583	0.0716864	-0.796032	-0.894387	-0.844191	-0.841788	-0.725591	0.211112	-0.808202	-0.85406	-0.535149	-0.814237	-0.883205	-0.425418	-0.0964293	0.895228	0.00611312	-1.1162	-0.606324
ECD_03067	RNA polymerase, sigma 54 (sigma N) factor	-0.693235	2.6934	2.60338	2.62658	1.75937	2.65057	2.61465	2.53573	2.45013	-4.9425	1.58062	1.55484	1.4753	1.65097	1.64157	1.6562	1.66695	-2.03836	1.12413	1.10774	1.10738	1.1303	0.964955	1.10627	1.09317	1.09603	1.06875	0.729364	-3.63854	0.134351	-2.10083	2.82684	2.76484	2.63773	2.77218	2.50192	-3.08074	2.75649	2.67465	2.66174	2.86038	2.75067	2.57818	-4.68828	-2.16966	-1.69426	1.3169	0.0444037
ECD_04055	DUF1471 family periplasmic protein	0.0680198	0.97771	0.913756	0.949467	0.491174	0.946186	0.984486	0.88163	0.890518	0.327636	0.862066	0.818909	0.765252	0.945331	0.963895	0.963347	0.977579	0.442978	1.51794	1.51757	1.5003	1.47179	1.32617	1.47749	1.4658	1.44341	1.4091	1.60188	0.23133	0.553401	0.104922	0.689217	0.685962	0.458491	0.616312	0.38321	-0.406858	0.675945	0.610097	0.557821	0.783273	0.700622	0.670629	-2.00562	-0.0932432	-0.19533	1.14904	-0.26796
ECD_02359	putative oxidoreductase, FeS binding subunit/NAD/FAD-binding subunit	-0.0747034	0.709155	0.626243	0.678158	0.328268	0.66083	0.648959	0.59136	0.528566	0.147323	0.524413	0.558296	0.464447	0.574938	0.764382	0.601027	0.728154	0.298052	0.811382	0.799377	0.804775	0.820028	0.956266	0.784389	0.787358	0.763522	2.28905	0.736566	0.0734701	0.00606656	-0.149713	0.704043	0.559509	0.524086	0.551487	0.656749	0.258567	0.554962	0.561547	0.494666	0.587398	0.508555	0.619381	0.266832	-0.593465	0.0110752	0.636679	-0.074923
ECD_02623	TPM domain protein, putative phosphatase	0.285114	0.511544	0.474009	0.491687	1.29987	0.54876	0.503334	0.441855	0.382678	-0.688047	0.504051	0.497004	0.45195	0.550716	0.538813	0.563306	0.568805	-0.270587	0.359028	0.353448	0.346646	0.356761	0.282038	0.362966	0.305375	0.323448	0.342	0.405554	-0.439721	-0.216383	-0.198128	0.197024	0.16843	0.126391	0.429314	0.581264	-0.0994159	0.177153	0.155572	0.1178	0.209154	0.172702	-0.00333901	-1.17386	0.989836	-0.194954	0.578431	4.01319
ECD_01789	mannose-specific enzyme IID component of PTS	-0.212056	-1.38227	-0.968427	-1.3868	-1.03305	-1.39858	-1.38325	-1.45548	-1.50672	-0.105325	-1.50244	-1.50802	-1.50075	-1.47124	-1.43606	-1.40356	-1.46502	-0.248541	-1.68976	-1.6879	-1.67822	-1.67089	-1.7084	-1.69509	-1.72669	-1.71304	-1.6879	-1.44492	-0.0791356	-0.186098	-0.0628747	-1.48229	-1.51246	-1.28018	-1.03401	-1.36106	-0.0144435	-1.50297	-1.49436	-1.52343	-1.50971	-1.51855	-1.56637	0.376276	-0.642647	-0.30628	-0.642316	4.00705
ECD_02783	UPF0235 family protein	0.42945	0.272631	0.175365	0.226289	0.425544	0.207767	0.213953	0.199031	0.0592746	0.152532	-0.0814222	-0.0754459	-0.127444	0.00606095	-0.0374715	0.00883474	0.0032119	-0.205876	-0.0839262	-0.0890347	-0.081228	-0.0684069	-0.169384	-0.0907771	-0.12831	-0.123203	0.470838	-0.0248279	0.0247772	-0.0817259	-0.300511	-0.24926	-0.297596	0.230325	0.472511	-0.466706	-0.0860097	-0.283349	0.0976757	-0.34434	-0.233322	0.062381	-0.033903	0.215429	-3.53511	-0.815877	-0.267768	-0.320206
ECD_03625	5-methylaminomethyl-2-thiouridine modification at tRNA U34	-0.582336	4.00001	3.88732	3.98173	2.59908	3.9782	3.9048	3.8932	3.65933	-2.37287	3.01418	2.98704	3.06826	3.24482	3.23722	3.19443	3.25508	-1.74478	3.18063	3.1487	3.16016	3.16497	2.95814	3.14216	3.13136	3.11894	2.98607	2.57393	-2.9459	0.179582	-2.53689	2.83395	2.84549	2.43756	2.61989	2.28341	-1.78507	2.73632	2.68641	2.52633	2.85405	2.77535	2.58055	-2.91824	-1.31973	-0.256107	2.70127	2.13313
ECD_02110	microcin C ABC transporter ATPase	0.478447	1.20825	1.11823	1.16762	0.727894	1.16945	1.15143	1.11037	1.00498	0.0994846	0.745051	0.734713	0.695896	0.76863	0.762576	0.772624	0.792782	0.154793	0.421018	0.400054	0.419989	0.388118	0.331917	0.402619	0.380634	0.39985	0.400311	0.61423	-0.249213	-0.460848	-0.443771	0.444164	0.506414	0.40032	0.445087	0.505554	-0.336409	0.430273	0.39642	0.563546	0.4304	0.397383	0.638058	0.794077	-0.556988	0.464041	0.777233	0.531937
ECD_01124	spermidine/putrescine ABC transporter ATPase	-0.036366	-0.025288	-0.100914	-0.0910577	-0.367214	-0.0803237	-0.0401287	-0.11534	-0.163569	0.408292	0.156538	0.184329	0.146146	0.203726	0.197953	0.218519	0.208925	-0.207602	-0.489202	-0.493939	-0.482762	-0.466794	-0.581702	-0.495287	-0.501476	-0.51359	-0.49611	-0.598885	-0.124323	-0.156525	0.3992	-0.0168833	-0.0595751	-0.00673749	0.00599749	0.0100599	0.272268	-0.0595764	-0.027901	-0.00830459	-0.0288241	-0.0362323	0.583549	-0.738278	3.99168	-1.28125	0.0958534	-0.69905
ECD_t00008	tRNA-Gln	-0.203658	-3.05469	-3.11837	-3.08969	-3.45591	-0.9999	-1.46825	-3.11038	-1.64664	-0.153721	-3.27056	-3.28351	-3.32126	-3.22169	-3.19717	-3.19106	-3.18711	0.5487	-3.21839	-3.22867	-1.18382	-3.2007	-3.31856	-3.23166	-3.26301	-3.24153	-3.274	-2.22761	0.405177	-0.496318	0.264355	-3.2249	-3.22028	-3.24791	-3.18549	-1.26452	0.404131	-3.20091	-3.16976	-3.23297	-3.1831	-3.21743	-3.31835	2.1438	1.89138	-0.187669	-3.24815	0.781453
ECD_02066	DedA family inner membrane protein	-0.148148	-0.16664	-0.251218	-0.195033	-0.559224	2.62594	-0.204186	-0.244044	-0.327644	0.123815	-0.0392352	0.211535	-0.0797344	-0.0210049	-0.0256118	-0.000890231	-0.0157542	0.798593	0.33728	0.321895	0.339319	0.345587	1.26862	0.320112	0.331761	0.320886	0.444146	0.143017	-1.47784	0.610814	-0.25316	-0.784662	-0.789745	-0.8274	-0.766146	-0.826427	-0.421899	-0.738136	-0.789818	-0.80369	-0.741379	-0.804659	-0.231325	-0.350737	-2.47507	-1.71395	-0.628074	-1.5517
ECD_00883	macrolide transporter membrane fusion protein (MFP) component	0.0803011	-0.160137	-0.231492	-0.201266	-0.526039	-0.180434	3.97646	2.77184	-0.297963	-0.125429	0.240019	0.254074	0.963549	0.271772	0.266388	0.273872	0.281078	-0.353761	0.406543	0.369604	0.380591	0.395764	0.299388	0.368941	0.533955	0.39032	0.385227	0.218103	-0.559111	-0.0463361	0.55273	0.299101	0.248441	0.21133	0.316553	0.255515	0.744485	0.255556	0.5046	0.251255	0.260035	0.514571	0.611554	-0.149566	-2.04656	-0.0521308	-0.065705	-0.529909
ECD_01822	6-phosphogluconate dehydratase	0.250254	0.112388	0.0707195	0.129593	-0.179667	0.108637	0.699899	0.0407447	0.0130188	0.316686	0.574751	0.567356	0.525219	0.587168	0.603889	0.61576	0.628332	0.110886	-0.00378756	-0.0328614	-0.0133183	-0.00302744	-0.0198489	-0.0178972	-0.0283032	-0.0221924	-0.00546303	-0.197565	-0.608239	0.220826	-0.267747	-0.0701567	-0.102171	0.201438	-0.0541218	-0.124516	-0.325853	-0.0909529	-0.0865028	-0.102841	-0.0867739	-0.0987755	0.600633	0.736467	0.422229	0.450695	0.0673773	0.562864
ECD_01075	flagellar protein of basal-body outer-membrane L ring	-0.0683875	-1.40595	-1.1018	-1.46026	-1.70223	-1.45016	-1.39538	-1.47829	-1.53877	0.377179	3.96953	-1.20021	-1.23036	-1.19239	-1.19512	-1.1687	-1.19758	-0.422134	-1.3372	-1.34861	-1.33062	-1.33648	-1.43847	-1.35144	-1.37361	-0.805938	-1.35011	-0.85962	-0.244584	-0.417981	0.415575	-1.1264	-1.18401	-1.12139	-0.854098	-1.13224	0.481653	-1.16908	-1.1371	-1.10474	-1.15139	-0.848973	-0.429951	-1.21063	0.227152	-0.947837	-1.29762	-0.413418
ECD_02672	DUF2509 family protein	-0.343672	-0.228946	-0.522804	-0.478395	-1.06388	-0.456867	-0.464936	-0.505188	-0.606833	0.0160598	-0.282691	-0.278603	-0.103892	-0.217058	-0.237001	-0.196351	-0.215509	0.210703	-0.211647	-0.219015	-0.213154	-0.225072	-0.302683	-0.215935	0.119135	-0.245879	-0.237841	-0.342142	0.129447	0.408527	0.0914695	0.0797041	0.0444673	-0.0421896	0.203276	0.233514	0.270727	0.0589161	0.221538	-0.0175059	0.0745525	0.0327287	0.590882	0.35978	0.295816	-0.373919	0.104843	0.00284769
ECD_02392	phosphoribosylglycinamide formyltransferase 1	-0.104059	0.541028	0.458437	0.501118	0.535238	0.504148	0.498886	0.427076	0.355239	0.0878544	0.269377	0.257139	0.232383	0.311944	0.311346	0.32201	0.336634	0.00130674	0.0440493	0.0388865	0.045149	0.0618533	-0.0589919	0.0227575	0.0170324	0.0104881	0.0419875	0.412061	-0.185028	0.0208994	-0.0419642	0.20334	-0.0958655	-0.121288	0.238912	-0.182549	-0.165882	-0.0862238	-0.0804047	0.246543	-0.065851	-0.159982	-0.227612	-1.09763	0.773073	0.217556	3.96428	-1.27934
ECD_01818	extracellular Colicin M immunity family protein	-0.125846	-0.999854	-1.0445	-0.990538	-1.13123	-1.00837	-1.00831	-1.06297	-1.06023	-1.37718	-1.10197	-1.10802	-1.13665	-1.11285	-1.092	-1.05541	-1.09289	0.503006	0.505549	0.468412	0.496014	0.50579	0.517003	0.484384	0.518833	0.500524	0.533589	0.402152	1.33627	0.217756	-0.643342	-1.33856	-1.3622	-1.2808	-0.0713118	-1.32311	-1.37728	-1.34728	-1.31409	-1.3175	-1.35338	-1.34207	-1.32917	0.293215	-1.88786	-0.0802801	-0.681082	1.54794
ECD_03590	tRNA U34 5-methylaminomethyl-2-thiouridine modification GTPase	-0.396761	3.95778	3.82527	3.93125	2.85821	3.92518	3.86183	3.85471	3.62292	-2.42333	2.73065	2.71872	2.65325	2.95695	2.95282	2.93256	2.97842	-2.42487	3.21059	3.18572	3.19227	3.19816	2.9923	3.17418	3.1598	3.14725	3.02275	2.64484	-2.81408	-0.0902915	-0.86424	2.91732	2.87984	2.58862	2.73265	2.37434	-3.88066	2.86779	2.7664	2.65934	2.98256	2.91579	2.70881	-3.77668	-2.13418	-0.859611	2.19007	2.22741
ECD_00847	e14 prophage; putative tail fiber assembly protein	0.283882	0.540134	0.475133	0.500639	0.870924	0.507789	0.506635	0.459657	0.404066	-0.0533121	1.11221	0.898808	0.840808	0.935167	0.927356	0.922075	0.946968	0.520207	0.413414	0.393501	0.403535	0.406371	0.324346	0.39205	0.38128	0.396427	0.402358	0.208719	-0.0758317	0.340311	-0.206715	0.164156	0.108931	0.0819096	0.189312	0.0831525	0.113223	0.476615	0.0911925	0.112358	0.119702	0.130184	-0.000436599	-0.259245	1.65496	0.630739	0.459482	0.0117395
ECD_02096	fused fructose-specific PTS enzymes: IIBcomponent/IIC components	-0.0106858	2.84319	-0.0222037	-0.266517	-0.067631	-0.251015	-0.273534	-0.297238	0.023213	-0.00898805	0.417084	0.227526	0.421263	0.0583128	0.0534026	0.0779481	0.155909	0.314793	0.20976	0.185432	0.207597	0.206213	0.133975	0.197468	0.198873	0.193204	1.16755	0.0560675	-0.122965	-0.129023	0.219422	-0.0158579	0.22358	-0.0498888	0.00599749	0.0625897	0.313361	-0.00151749	-0.0248425	-0.0456832	-0.0018575	0.455911	-0.141864	-0.573837	-0.300736	-0.531309	0.0247078	-0.367108
ECD_01924	histidinol-phosphatase and imidazoleglycerol-phosphate dehydratase	0.146426	-0.604799	-0.649921	-0.599576	0.193005	-0.618027	-0.610641	-0.660545	-0.71489	0.251638	-0.596995	-0.594886	-0.64588	-0.576602	-0.5809	-0.552032	-0.578112	-0.238821	-0.692625	-0.73074	-0.720664	-0.695637	-0.718866	-0.712349	-0.713872	-0.717454	-0.70539	0.356135	-0.392697	0.150196	0.306023	-0.0191341	-0.0480596	-0.0429435	0.0734371	-0.0418564	-0.0431039	-0.0316191	-0.0605583	-0.0638548	-0.0318553	-0.0698796	-0.146284	-0.0932923	0.708696	1.05669	-0.573938	-0.0230091
ECD_00381	cytochrome o ubiquinol oxidase subunit III	0.00137759	-0.103535	-0.181665	0.243798	-0.1678	-0.128545	-0.138254	-0.178467	-0.250804	-0.194975	-0.469328	-0.514416	-0.259527	-0.436989	-0.431345	-0.407169	-0.427029	0.0498025	-0.392589	-0.390986	-0.381497	-0.364683	-0.0911365	-0.399214	-0.405138	-0.422758	-0.19902	-0.136695	-0.0457932	0.00526806	-0.0245476	-0.306614	-0.346639	-0.398128	-0.217158	0.30656	-0.117716	-0.352884	-0.198369	-0.165248	-0.274195	-0.369802	-0.532889	0.162154	-0.307915	-0.504351	-0.655648	-0.9273
ECD_03071	phosphohistidinoprotein-hexose phosphotransferase component of N-regulated PTS system (Npr)	-0.0593762	0.00237026	-0.101427	-0.0646368	-0.364062	-0.0590385	-0.0614866	-0.142041	-0.22137	0.122389	0.305105	0.296632	0.200296	0.378738	0.359746	0.385132	0.387399	-0.082457	-0.131708	-0.155116	-0.15419	-0.131855	-0.298427	-0.156803	-0.170775	-0.166939	-0.192783	-0.0844637	0.307528	0.56698	0.324976	0.385298	0.530894	0.562459	0.32979	0.167183	0.234083	0.334187	0.273957	0.887744	0.425429	0.318992	0.381826	-0.143512	-1.00636	0.0499521	0.167153	0.125513
ECD_02055	inner membrane putative sensory kinase in two-component system with YehT	-0.191647	0.0977741	0.0217171	0.0682296	0.36725	0.085807	0.0595299	0.0200721	-0.0648634	-0.150229	0.0652703	0.0603046	0.0221261	0.0849593	0.0791395	0.108731	0.0882607	-0.0169387	0.101317	0.0906825	0.238151	0.114123	0.0362931	0.0889902	0.0984808	0.0846625	0.089944	-0.107383	-0.290212	-0.0464007	-0.0672698	0.539401	0.449332	0.433988	0.475835	0.757793	0.0741138	0.483144	0.691375	0.429518	0.523814	0.436891	0.3318	-0.0546581	-1.55974	-0.411904	0.42396	0.491811
ECD_02219	UPF0304 family protein	0.0389928	-0.206989	-0.299953	-0.250556	-0.717896	-0.251869	-0.215996	-0.287052	-0.399604	-0.374129	-0.196147	-0.193903	-0.239005	-0.162859	-0.161248	-0.135548	-0.163591	0.347619	0.0406813	0.0257806	0.0563611	0.259837	0.164838	0.000655262	0.0203321	-0.0101806	0.0311905	0.197477	0.0540371	0.150216	-0.0145467	-0.391256	-0.429575	-0.42322	-0.398154	-0.471057	0.145673	-0.40845	-0.425524	-0.431715	-0.42118	-0.407532	-0.237007	0.48547	-2.10184	0.38946	0.125485	-0.441303
ECD_00506	DLP12 prophage; putative phage lysis protein	-0.0592348	0.139232	0.0851346	0.113757	1.06921	0.104876	0.124571	0.0731074	-0.0136477	-0.580954	0.0252556	0.00244044	-0.0430351	0.0488626	0.0462953	0.0676988	0.0689944	-0.616285	-0.602039	-0.608035	-0.592405	-0.594948	-0.696262	-0.614089	-0.654496	-0.629375	1.02438	-0.886448	-0.397118	-0.219557	0.125985	0.185134	0.137769	0.315657	1.52101	0.0905266	-0.0185959	0.15439	0.158308	0.149685	0.222609	0.191936	-0.00836537	0.939203	2.39167	-0.517094	0.457168	-0.905392
ECD_02332	RpoE-regulated lipoprotein	0.211699	-0.0797254	-0.472034	-0.420942	1.00346	-0.449247	-0.422534	-0.490676	0.133828	0.0226061	-0.0447088	-0.0246207	0.302136	-0.00736841	0.00541332	0.0254784	0.00990401	0.370236	-0.388962	-0.393711	-0.392066	-0.375517	-0.200359	-0.405845	-0.412627	-0.43035	-0.0790645	-0.546887	0.151503	-0.5551	0.301311	-0.330238	-0.353993	-0.410341	-0.370132	0.562728	0.0579532	-0.345691	-0.340195	-0.398197	-0.325955	-0.384004	0.636487	1.21192	-1.64527	1.20175	0.243069	1.18904
ECD_02243	tRNA pseudouridine(38-40) synthase	0.376375	3.6465	3.5867	3.59947	3.03561	3.65376	3.55793	3.5026	3.42171	-0.74779	3.71261	3.71198	3.61758	3.81062	3.79326	3.74748	3.90224	-0.41751	2.73117	2.69313	2.72778	2.71053	2.64398	2.68779	2.76395	2.71589	2.76433	2.57745	-1.19849	0.712594	-0.554686	2.48596	2.43575	2.45715	2.50883	2.45259	-0.98218	2.44767	2.39196	2.38014	2.47198	2.45533	2.32738	-2.30615	0.373557	0.243481	2.97417	1.85638
ECD_02062	beta-D-glucoside glucohydrolase, periplasmic	-0.0011539	0.47652	0.393159	0.446845	0.54525	0.450788	0.433912	0.395562	0.31172	-0.00450926	0.549907	0.544781	0.501476	0.569333	0.562706	0.855391	0.581376	0.298903	0.73266	0.718554	0.731858	0.740856	0.876037	0.717284	0.736902	0.718478	0.712195	0.835158	0.380295	-0.138259	-0.0978514	0.591111	0.583326	0.918187	0.592082	0.541884	0.389301	0.59275	0.547982	0.661684	0.63489	0.851799	0.744944	-0.445238	-0.658614	-0.738507	0.648676	0.394089
ECD_03370	inner membrane putative BrbK family alternate lipid exporter	-0.00983274	-0.180073	-0.584152	-0.471708	-0.633385	0.144761	-0.343285	-0.575135	-0.556424	-0.103126	-0.464342	-0.448164	-0.539845	-0.30411	-0.309033	-0.295337	-0.340794	-0.179853	-0.22865	-0.243642	-0.222773	-0.238457	-0.444327	-0.248834	-0.333324	-0.317849	-0.0518145	-0.793934	0.286674	0.186538	0.0684263	-0.301235	-0.313053	-0.107674	0.354451	-0.384941	0.142386	-0.289029	-0.0134082	-0.0591766	0.0489057	-0.312747	-0.408248	0.095371	-0.0333319	0.35594	0.507973	1.26019
ECD_02308	transcriptional regulator of yefH	-0.113209	-0.0271797	-0.0823712	-0.0612824	0.126034	0.155637	-0.0493577	-0.102507	0.198097	0.0621176	0.278539	0.299643	0.23021	0.325012	0.323608	0.346417	0.346472	0.234447	0.545747	0.844431	0.545997	0.557824	0.427228	0.52587	0.524518	0.511477	0.554536	0.719133	0.310918	-0.239547	-0.543943	0.167286	0.148348	0.0983724	0.605528	0.0870561	0.0459572	0.141219	0.153812	0.104136	0.179706	0.1379	0.341871	-0.358108	0.795977	0.85954	1.09684	0.66498
ECD_01563	glucosamine anaerobic growth regulon transcriptional repressor; autorepressor	0.586917	1.58982	1.56741	1.62966	2.655	1.56872	1.58179	1.51402	1.49092	0.71685	2.24235	2.21793	2.19343	2.29008	2.28425	2.26767	2.33108	-3.16071	0.891118	0.878806	0.890697	0.879493	0.78725	0.8797	0.923989	0.889906	0.938145	0.786357	-1.28588	0.03075	1.46683	3.87025	3.75066	3.8529	3.89342	3.78912	0.776097	3.72117	3.67263	3.69187	3.83702	3.77404	3.70591	-2.01349	0.397106	1.40964	1.57216	0.824955
ECD_02253	murein DD-endopeptidase	-0.0193412	-0.203242	3.89252	-0.232379	-0.6668	-0.253687	-0.220039	-0.0381533	-0.382717	-0.141513	-0.041207	-0.0222109	-0.091198	-0.00124783	-0.00355491	0.0169408	0.0230697	0.110924	-0.260452	-0.265432	-0.251715	-0.241911	-0.310706	-0.275432	-0.261984	-0.280906	-0.245774	-0.120229	-0.181487	0.114915	0.386488	-0.428613	-0.452448	-0.442868	-0.430044	-0.237922	-0.157398	-0.421732	-0.462969	-0.1452	-0.40917	-0.445715	-0.250616	0.273783	0.276948	-0.0668264	-0.256527	0.516537
ECD_00780	threonine and homoserine efflux system	0.447421	0.162262	0.119909	0.179626	0.0617435	0.148671	0.164072	0.0797063	-0.00328117	0.335742	0.33203	0.2856	0.246601	3.88856	0.35644	0.357403	0.377226	0.222254	0.0766138	0.0693642	0.063491	0.0655648	0.0976092	0.0676968	0.0304256	0.0563386	0.0640452	-0.00307396	-0.181889	-0.0710787	0.26069	-0.154765	-0.194427	0.215897	-0.122278	-0.233248	-0.000217227	-0.1855	-0.194408	-0.187687	-0.151002	-0.184405	-0.0115881	-0.673577	-2.22798	0.586987	-0.174493	1.39081
ECD_02247	putative arabinose efflux transporter	0.24517	-0.439163	-0.519063	-0.466141	0.179116	0.090284	-0.446682	-0.526295	-0.610583	0.245433	-0.0550253	-0.0513897	-0.102183	-0.0116564	-0.014368	0.00661125	0.008571	0.376414	-0.52624	-0.533292	-0.507296	-0.506411	-0.578427	-0.538781	-0.534922	-0.552404	-0.51056	-0.675204	0.515335	0.130099	0.0496706	-0.276156	-0.600083	-0.112289	-0.580332	0.32158	-0.57336	-0.568418	-0.60504	0.0233969	-0.584286	-0.594265	-0.200956	0.798131	1.29344	1.39096	-0.786785	0.664595
ECD_00852	putative transporter	-0.0176477	0.423146	0.371579	0.393638	0.044061	0.403682	0.404408	0.356685	0.499224	0.12664	0.225589	3.87823	0.179161	0.250583	0.243599	0.259453	0.267783	-0.233726	0.146555	0.136577	0.143194	0.152081	0.307595	0.134699	0.116403	0.129993	0.143295	0.358343	-0.265509	0.422983	0.408805	0.297343	0.495318	0.209068	0.312692	0.219234	-0.112287	0.208255	0.195304	0.24374	0.252674	0.25606	0.137044	-0.164092	-2.20332	-0.459877	-0.155858	0.0412259
ECD_01703	phospho-chitobiase; general 6-phospho-beta-glucosidase activity	0.11272	0.554222	0.520224	0.542093	0.834063	0.545357	0.533755	1.04459	1.15642	0.392855	0.606843	0.609911	0.589568	0.639595	0.645361	0.655884	0.670969	0.420941	0.946212	0.916189	0.935261	0.94203	0.901059	0.916314	1.3096	0.940275	0.945497	0.77478	-0.0564773	-0.0976623	0.0547756	0.674844	0.633228	0.621481	0.660227	0.553232	0.2403	0.643458	0.644692	1.01163	0.64065	0.608489	0.5553	0.942629	3.87619	1.20005	0.41428	0.870955
ECD_02972	DUF805 family inner membrane protein	0.34499	-0.137155	-0.259659	-0.198152	2.14914	-0.228909	-0.218619	-0.247939	-0.409199	-0.534474	-0.246324	-0.255086	-0.344076	-0.162059	-0.177751	-0.159948	0.658225	-0.150659	0.294961	0.261902	0.27838	0.292774	0.147887	0.284937	0.232427	0.248471	0.220688	-0.0850834	-0.482993	-0.490303	-0.906772	0.0106486	-0.0240797	-0.144646	-0.016299	-0.311559	0.101499	-0.015908	-0.0786247	0.796975	0.0204019	-0.0758396	-0.173854	0.725167	1.99712	-2.69187	0.222876	1.30583
ECD_01666	putative electron transfer flavoprotein subunit	0.267962	0.52246	-0.0871981	-0.0436871	0.356648	-0.0534432	0.594759	-0.143371	-0.182558	0.162446	-0.319765	-0.315281	-0.33298	-0.305404	-0.301644	-0.272104	-0.291529	0.0437591	0.0628007	0.0980599	0.107818	0.0821426	0.035472	0.0883679	0.053386	0.0865385	0.0877536	0.416791	0.226768	0.699782	-0.179746	-0.533743	-0.586311	-0.601777	-0.564327	-0.0818775	-0.471077	-0.572502	-0.541737	-0.583527	-0.556111	-0.621786	-0.660919	-0.171183	1.83659	-0.416963	0.00578941	-0.725377
ECD_04040	GTPase, stimulated by 50S subunit binding; Mn(2+) homeostasis regulator	-0.333171	0.341335	0.251375	0.292773	-0.380232	0.278402	0.546507	0.655627	0.340339	0.324318	0.462949	0.418301	0.467737	0.567505	0.564535	0.570429	0.5777	-0.0795489	0.386088	0.378966	0.612021	0.348668	0.416733	0.340513	0.327665	0.315791	0.288587	0.281786	0.00915485	-0.218556	0.317784	0.446968	0.441761	0.226751	0.378161	0.450182	0.144422	0.652709	0.372756	0.410923	0.552144	0.526595	0.910124	0.0691372	-0.512347	0.110913	0.655013	0.42674
ECD_01452	putative periplasmic M16 family zinc metalloendopeptidase	0.0271692	-0.23081	-0.25296	-0.18508	-0.486023	-0.249481	-0.207266	0.350394	-0.314995	0.70318	0.628147	0.614153	0.60331	0.648838	0.652657	0.670673	0.653809	-0.055617	0.228941	0.265101	0.274974	0.248949	0.194703	0.263442	0.26069	0.210931	0.297615	0.167549	0.0564215	-0.56801	-0.143417	0.622234	0.54727	0.565294	0.574063	0.818505	0.169765	0.528766	0.60191	0.56563	0.594685	0.540348	0.50935	-1.08948	2.5899	-0.270279	0.536693	1.80834
ECD_03253	heat shock protein Hsp33	-0.0653223	0.355313	0.275853	3.85814	0.510157	0.330532	0.685184	0.20224	3.73539	-0.0658134	0.105874	0.471432	0.659107	2.3172	0.245708	0.267927	0.270777	-0.118779	0.807793	0.798168	0.799736	0.792827	0.676956	0.792016	0.952155	0.767546	0.800088	0.581206	0.139732	0.0677564	-0.0713703	0.352971	0.754076	0.109524	0.27136	0.198377	0.0951307	0.330469	0.461761	0.645526	0.41675	0.321113	0.116132	0.459889	0.0120526	-0.147979	0.901685	0.639518
ECD_02990	tartronate semialdehyde reductase	0.22062	0.129692	0.0486757	2.00095	0.339636	0.0402179	0.051034	0.0172551	3.855	-0.0767871	0.130194	0.145778	-0.10283	-0.0185193	-0.0255871	-0.00816947	-0.00515946	-0.100423	-0.0698027	-0.100957	-0.0988583	-0.0715657	-0.0157481	-0.076769	-0.0266709	-0.124115	0.169176	-0.24802	0.269459	0.0359881	-0.376681	-0.329103	-0.519921	-0.368414	-0.37828	0.0741934	-0.170466	-0.366805	-0.490578	-0.546992	-0.48965	-0.598507	-0.0801468	0.351668	0.330932	0.189935	-0.0807435	-0.338519
ECD_03217	nitrite reductase (NADH) small subunit	-0.500609	0.723865	0.666874	0.7093	0.701426	0.708574	0.688878	0.597124	0.468688	-0.168862	0.865668	0.8641	0.781031	0.944834	0.938198	0.980344	0.965756	0.110252	1.30632	1.30004	1.29513	1.28221	1.07947	1.29828	1.23111	1.2738	1.44984	0.801655	0.348939	1.09786	-0.400309	0.692086	0.355609	0.221338	0.260357	0.0164535	0.0565937	0.388038	0.306236	0.237876	0.463658	0.358642	0.150594	0.472207	1.09376	0.115977	0.950656	3.85025
ECD_01003	DnaK co-chaperone; curved DNA-binding protein	0.38464	-0.0720183	-0.160429	-0.138569	-0.411666	-0.0879658	0.437323	-0.169863	-0.197358	0.0714714	-0.295142	-0.285551	-0.318491	-0.262593	-0.267964	3.84726	-0.264574	0.00696043	0.00747989	-0.00709838	0.0124659	0.0189649	-0.0878234	0.000905787	-0.00614791	-0.0117418	0.0216531	-0.119375	0.445651	0.228178	-0.290221	-1.05221	-1.10069	-0.246411	-1.03664	-1.09091	-0.0520276	-1.12199	-1.07774	-1.06267	-1.09445	-1.06771	0.107959	-0.399397	-2.37874	-0.807475	-0.463769	-0.451125
ECD_03219	fused siroheme synthase 1,3-dimethyluroporphyriongen III dehydrogenase and siroheme ferrochelatase/uroporphyrinogen methyltransferase	0.149023	1.27434	1.21589	1.26473	0.539453	1.25958	1.23338	1.14028	1.01385	-0.65728	0.57153	0.558096	0.474299	3.84686	0.652523	0.673871	0.680726	0.480048	1.13452	1.128	1.11368	1.09547	1.2525	1.12289	1.04638	1.09161	1.02351	0.614576	0.099651	0.13845	-0.208106	0.566272	0.522826	0.701983	0.432856	0.909821	-0.0987843	0.551976	0.471219	0.402539	0.626948	0.528377	0.319761	0.236059	-0.653542	-0.083567	1.29432	-0.399234
ECD_00132	pantothenate synthetase	0.381105	1.16265	1.12697	1.13629	1.35042	1.14401	1.13553	3.40509	0.918511	0.113542	0.87715	0.88893	0.818253	0.968369	0.965434	0.968218	0.987687	-0.2175	0.56932	0.573165	0.571542	0.581035	0.469655	0.56055	0.528031	0.519539	0.552806	0.271367	-0.344678	-0.209655	-0.33076	0.720043	0.684866	0.648817	3.84525	0.516787	0.0947751	0.712297	0.682009	0.624317	0.76008	0.629885	0.471332	0.251278	1.01221	-0.448999	0.778679	0.149719
ECD_02390	uracil phosphoribosyltransferase	-0.162821	-0.485801	-0.904846	-0.850326	-0.672382	-0.851018	-0.858397	-0.923672	-0.923289	0.0110895	2.08699	-0.656035	-0.676954	-0.605479	-0.60516	-0.586465	-0.589063	-0.0640823	-0.90985	-0.910334	-0.91199	-0.882858	-0.868235	-0.927001	-0.94603	-0.944236	-0.513924	-0.899346	-0.0297645	-0.102568	0.0597021	-0.589934	-0.619755	-0.645055	0.170466	-0.320297	0.432628	-0.60845	-0.601764	-0.66538	-0.435068	-0.516913	-0.404261	0.174258	0.630697	0.178069	-0.528934	-0.585727
ECD_01174	dihydroxyacetone kinase, C-terminal domain	0.680856	0.296754	0.192126	0.192224	-0.0798394	0.216542	0.296956	0.201359	0.156117	-0.672515	-0.147174	-0.0940299	-0.130292	-0.0849377	-0.0904526	-0.097532	-0.100378	0.0238464	0.161035	0.151986	0.164127	0.175711	0.0840053	0.153939	0.151653	0.137815	0.166867	0.0837142	-0.293379	0.123093	0.239541	0.354719	0.305843	0.311065	0.346549	0.329901	0.916889	0.311143	0.341463	0.362639	0.313	0.331602	1.1688	0.0606861	-0.915299	1.24276	0.656142	0.184065
ECD_02470	ATP-dependent RNA helicase	-0.776384	1.3331	1.24578	1.28814	1.06369	1.30783	1.26925	1.27542	3.82766	-1.56559	3.70483	1.07647	1.03509	1.15529	1.15485	1.14767	1.18184	-0.982102	1.32592	1.31262	1.31757	1.33052	1.64615	1.30606	1.30995	1.3005	1.33934	1.47684	-0.83149	-0.0700108	-0.94008	0.957606	0.922777	0.911097	0.944395	0.838256	-1.20423	1.11498	0.938923	0.888235	0.964058	0.885513	1.00468	-0.47482	-0.574306	-0.143334	1.17285	1.18216
ECD_01160	oxidoreductase that catalyzes reoxidation of DsbA protein disulfide isomerase I	0.337426	1.47334	1.41984	1.38087	1.56264	1.43538	1.4439	1.38855	1.33016	-0.327883	0.457744	0.490433	3.30636	0.517083	0.50865	0.513556	0.535886	-0.0920699	0.704511	0.670519	0.695655	0.692668	0.667082	0.689543	0.676816	0.689512	0.665945	0.636857	-0.241094	0.0108216	-0.756834	0.113849	0.0707683	0.119936	0.133185	0.451226	-0.363949	0.0686066	0.464641	0.125515	0.108543	0.0929564	0.0694169	0.118315	0.582202	-0.238855	0.806992	0.580385
ECD_02191	2-succinyl-5-enolpyruvyl-6-hydroxy-3- cyclohexene-1-carboxylate synthase; SEPHCHC synthase	0.227085	0.0289685	-0.0496019	-0.00387396	3.78936	-0.0192596	0.0264669	-0.0288125	-0.141516	-0.0179277	-0.201537	-0.197637	-0.253598	-0.159378	1.01683	-0.138199	-0.161778	0.325511	-0.135628	-0.142128	-0.129466	-0.123255	0.626809	-0.152609	-0.139811	-0.162867	-0.116502	-0.275395	0.611863	0.381148	-0.20618	-0.0410373	-0.352222	-0.0522321	-0.315019	-0.118991	-0.296252	-0.320045	-0.301594	-0.36283	-0.328704	-0.332324	-0.443028	0.501631	-0.775756	-0.770278	-0.31586	-0.134359
ECD_03450	putative Rhs-family protein	0.204142	-1.36909	0.460723	-0.962692	1.56902	-1.39786	-1.36596	-1.48969	-0.847128	-0.403207	-0.394853	0.324475	0.54445	-1.59128	-1.58797	-1.57665	-1.58475	-0.445571	-1.50198	-1.51337	-1.51292	-0.187162	-0.607025	-1.54464	-0.784675	-1.16538	-0.345353	1.53738	0.141948	0.319423	-0.185599	-1.82483	-1.83211	0.951867	-1.09748	0.45288	0.0334957	-1.80676	-1.95484	-0.786773	-1.69565	0.0217152	-0.955068	-0.25827	-0.988217	-0.209239	-1.38791	-0.995088
ECD_01824	putative DNA-binding transcriptional regulator	0.369604	-0.341407	-0.388903	-0.326315	-0.640457	-0.329536	-0.367889	-0.411319	-0.44504	0.224664	-0.414344	-0.42098	-0.455654	-0.411148	-0.391182	-0.367513	-0.382023	0.0487604	-0.485623	-0.513281	-0.483868	-0.484157	-0.503727	-0.495323	-0.504289	-0.502866	-0.482853	-0.680636	0.0564667	0.024604	0.0221767	-0.46055	-0.48702	-0.452556	-0.327139	-0.381849	0.287619	-0.484377	-0.466992	-0.492785	-0.462946	-0.153739	-0.527341	1.25375	0.50218	-0.00169643	-0.279737	0.262754
ECD_00445	acyl-CoA thioesterase 1 and protease I and lysophospholipase L1	0.224569	-0.305322	-0.37207	-0.326801	0.553196	-0.327916	-0.316542	-0.366367	-0.0359287	-0.0407023	3.00064	3.77494	-0.631964	-0.541493	-0.530718	-0.51727	-0.51128	0.00570238	-0.345571	-0.357656	-0.347852	-0.332578	-0.206989	-0.350739	-0.397047	-0.381539	-0.36615	-0.487253	-0.140488	0.106299	0.267899	-0.373672	-0.616617	-0.0130761	-0.0478604	-0.705766	0.0827496	-0.605695	-0.600323	-0.237781	-0.574172	-0.595742	0.54333	0.725724	0.377019	-0.0908036	-0.540312	-1.07225
ECD_02970	putative quinol oxidase subunit	0.37067	0.767217	3.76901	0.719826	0.496433	0.699477	0.685463	0.666206	0.539665	-0.246581	0.509969	0.513967	0.428174	0.604573	0.597391	0.60104	0.633742	0.221997	0.315343	0.289501	0.298298	0.314722	1.26002	0.304754	0.25062	0.270819	0.246261	0.720552	0.237084	-0.161168	0.0539598	0.0326385	0.0112295	-0.126969	0.528672	0.275872	0.141438	0.101781	0.482845	-0.00379929	0.0518424	-0.0437509	0.0311719	-0.55635	0.469006	0.16981	0.113097	0.417506
ECD_00297	lactose permease	-0.0744345	0.0133714	-0.062029	0.00342855	0.11622	-0.0381838	2.57803	-0.0878602	-0.0560372	0.0623413	-0.0881193	0.023532	-0.169548	-0.0596422	-0.0328905	-0.0155458	-0.018136	0.0176319	0.114796	0.243138	0.106102	0.127186	0.0548809	0.0982354	0.100642	0.455307	0.317613	-0.146984	-0.00764523	0.0484217	-0.139348	-0.0958198	-0.182315	-0.219825	0.169196	-0.103779	-0.140861	-0.141684	-0.0377044	-0.117126	-0.104679	0.413585	0.0336987	-0.898467	-3.06568	0.800101	-0.0541021	-0.393985
ECD_04071	Hexuronate transporter	-0.177057	0.882491	0.762293	0.868439	0.434699	0.850989	0.897165	0.791456	1.16039	0.482372	0.785595	1.06987	0.667359	0.869391	0.87918	0.883715	3.76542	-0.272382	1.07001	1.08084	1.06343	1.03525	1.13015	1.04496	1.01531	0.997729	0.996479	0.902688	0.0922206	0.467458	-0.18089	0.514962	0.494108	0.738923	0.899316	0.746976	0.0391094	0.488283	1.10461	0.597992	0.599727	0.508896	1.08663	-0.0636708	-0.798766	0.570591	0.889212	0.482027
ECD_03553	response regulator in two-component regulatory system wtih UhpB	-0.000304172	-0.0972144	-0.186033	-0.138148	-0.280136	-0.0845569	-0.164502	0.0954985	-0.429023	-0.0803829	-0.0582137	-0.322237	-0.176453	-0.0877557	-0.0905727	-0.0791268	-0.0775411	0.187793	-0.136912	-0.137832	-0.14108	-0.115121	-0.103786	-0.163496	-0.209113	-0.221723	-0.337178	0.423741	-0.0532254	0.0490425	0.0975999	-0.0740629	-0.097124	0.734376	-0.238465	0.512051	-0.140014	-0.0841118	1.10095	0.0376145	0.0198521	-0.0732865	0.179966	0.139026	-0.432441	-0.143468	-0.336576	-0.11727
ECD_01889	cytochrome b561-like protein	-0.15099	-0.504408	-0.541511	-0.498241	-0.804333	-0.504484	-0.512239	-0.55514	-0.605199	0.203403	0.190858	0.191754	0.147319	0.233461	0.226585	0.249639	0.22285	0.855524	0.0119823	-0.0136815	0.000197999	0.0155359	1.10252	-0.00617731	0.0342031	0.00271303	0.0390607	-0.159339	0.336779	-0.70923	-0.0202886	0.323629	0.300371	0.306396	0.334778	0.242864	0.043285	0.300137	0.29401	0.260691	0.316999	0.284667	0.20279	0.0820767	2.16191	0.237944	-0.237773	-1.20285
ECD_02977	putative L-serine dehydratase alpha chain	0.0203096	0.157784	0.0144102	0.256627	-0.0669846	-0.0406247	-0.00745324	-0.0465082	0.213523	0.18297	0.103186	0.120587	-0.000889782	0.16793	0.160754	0.185808	0.185608	-0.334675	0.121817	0.0970195	0.1036	0.124385	0.275497	0.114451	0.0502282	0.0738157	0.0692125	0.219123	-0.28517	0.0613602	-0.156282	0.18049	-0.00596419	-0.127699	-0.0126339	0.390525	0.119939	0.129527	-0.057	0.045756	0.043433	0.267558	-0.152287	0.0383532	-0.42603	-0.456095	0.0531081	0.586092
ECD_02097	fructose-1-phosphate kinase	-0.338831	0.0353468	-0.0366193	-0.000789366	0.313058	0.0189755	-0.00447753	-0.033542	-0.128459	-0.0566412	-0.141222	-0.154442	-0.18074	-0.124088	-0.127743	-0.106345	-0.108057	0.0138532	-0.452337	-0.455368	-0.446075	-0.443703	-0.504894	-0.457511	-0.47836	-0.472224	-0.445363	0.121177	0.183845	-0.132968	-0.124984	-0.749117	-0.755127	-0.794184	-0.741756	-0.799498	-0.124623	-0.736052	-0.752737	-0.776063	-0.737127	0.261276	-0.862936	1.45687	0.652467	-0.784422	0.386415	1.79851
ECD_03288	gluconate kinase 2	-0.144007	-0.366731	-0.105711	-0.381154	-0.487335	-0.399082	-0.389837	-0.508639	-0.669402	0.0763128	-0.40606	0.0197678	-0.525352	-0.293757	-0.299789	-0.27491	-0.283066	0.0751634	-0.413451	-0.422731	-0.0340868	-0.421976	-0.611147	-0.439169	-0.485625	-0.464959	-0.136026	-0.293728	-0.466854	0.214445	-0.0636318	-0.501856	-0.52976	-0.109751	-0.594173	-0.160059	0.0303239	-0.499871	-0.599901	0.0864472	0.277067	-0.518913	-0.237129	0.0394415	0.406709	-0.778731	-0.234035	-0.606496
ECD_02436	mutarotase superfamily protein, YphB family	0.163971	-0.189824	-0.289745	-0.229154	0.497252	-0.229651	-0.235664	-0.306209	-0.362058	-0.139398	-0.358202	-0.348764	-0.0686127	-0.279861	-0.284011	-0.274706	-0.274895	-0.221152	-0.440694	-0.44396	-0.436837	-0.418703	-0.52291	-0.452	-0.456185	-0.248929	-0.436806	-0.163982	-0.287116	0.378162	-0.219343	-0.525636	-0.570942	-0.212864	-0.561326	-0.661995	0.0752218	0.0159714	-0.529655	-0.601354	-0.540965	-0.621186	-0.698725	-0.481323	0.749322	-0.499517	-0.211104	0.0305345
ECD_02914	BMFP family putative fusogenic protein	-0.079658	-2.02036	-2.12378	-2.06568	-0.765227	-2.08696	-2.08367	-2.08226	-2.25042	0.13106	-0.295702	-0.71358	-0.72663	-1.86948	-1.88091	-1.85871	-1.87257	0.394693	-1.76626	-1.77698	-1.76824	-1.77667	-1.92456	-1.77472	-1.82414	-1.79157	-1.81789	0.286762	0.231968	0.240801	0.237558	-2.32142	-2.36561	-1.17749	-2.38916	-1.42624	-0.317567	-0.341911	-0.905712	-1.27533	-2.33351	-2.42625	-0.151473	-0.235351	0.192232	-0.352131	-2.18217	-1.67616
ECD_03847	pyridine nucleotide transhydrogenase, soluble	0.135151	0.960235	0.886276	0.949259	0.446829	0.907212	0.863933	0.95528	0.887314	-0.169555	0.513171	0.511249	0.579556	0.625657	0.628565	0.601181	0.61128	-0.804345	0.733405	0.717213	0.728242	0.730792	0.528395	0.716683	0.637538	0.637929	0.65435	0.423074	-0.226428	0.0151764	-0.5111	0.171665	0.218005	-0.0782114	0.287885	0.291276	-0.329965	0.11752	0.192044	0.435379	0.191682	0.496006	0.369693	-0.27351	-0.505972	-0.891028	0.598902	-0.206079
ECD_00742	biotin synthase	-0.0339398	0.5899	1.34666	0.56747	0.105263	0.543989	0.582904	0.511447	0.71868	-0.365185	1.35612	1.31345	1.26212	1.40309	1.39363	1.36351	1.40753	0.243189	0.685275	0.674954	0.671926	0.685354	0.563392	0.660346	0.65183	0.654895	0.670721	0.44871	0.207946	0.184717	0.123628	0.74204	0.74604	0.680903	0.991158	0.705496	-0.106162	0.72529	1.01668	0.695958	0.765075	0.748374	0.58765	0.676945	3.73321	0.60161	0.946545	1.10517
ECD_00581	2-(5''-triphosphoribosyl)-3'-dephosphocoenzyme-A synthase	-0.035309	-0.313615	-0.25929	-0.337543	-0.221671	0.0625749	-0.33798	-0.37265	-0.502576	-0.0120856	-0.0961407	-0.0987268	-0.157572	-0.0154759	-0.0205122	-0.0048304	0.00296222	0.0758202	0.0773864	0.0648654	0.0745592	0.081918	0.107659	0.0547814	0.029038	0.058345	0.0512729	0.144261	0.227606	-0.324154	0.0284183	-0.45775	-0.485857	-0.496484	0.0155917	-0.550203	0.0708856	-0.465902	-0.465866	-0.467832	-0.448948	-0.489477	-0.450501	0.283595	-1.06	-0.374201	-0.515723	-0.00841954
ECD_01974	3-methyl-adenine DNA glycosylase II	0.281458	1.08103	1.01942	1.29775	0.70257	1.06223	1.03106	1.00462	0.925422	0.191	0.660862	0.663106	0.600173	0.710214	0.702111	0.721764	0.70573	-0.703695	0.605692	0.567043	0.605808	0.599991	0.565861	0.576643	0.583747	0.590914	0.596049	0.422091	0.0298087	0.134597	0.190439	0.276955	0.261819	0.239197	0.285378	0.242673	-0.574491	0.278896	3.73175	0.393878	0.306488	0.56319	0.741027	-0.424769	1.35326	0.0103095	0.890064	1.08312
ECD_03244	DNA catabolic protein	0.12146	0.0444011	-0.0404286	0.281339	0.0671393	-0.0108419	-0.00196749	-0.128997	3.73029	0.425012	-0.00308548	0.00354847	-0.125132	0.12333	0.11824	0.14875	0.123988	-0.119807	-0.211137	-0.214794	-0.212323	-0.223294	-0.388485	-0.223867	-0.268942	-0.0101806	-0.319761	-0.260978	-0.306579	0.124635	0.339366	-0.28879	0.11396	-0.523348	-0.442785	-0.695107	-0.524032	0.117051	-0.0545323	-0.493831	-0.238616	-0.172825	-0.586334	-0.0496585	-0.765698	0.279243	-0.000701604	0.443218
ECD_04078	OapA family protein	-0.0536794	0.492593	3.72755	0.470984	0.269272	0.435399	0.704642	0.3736	0.23315	0.0871348	0.660436	0.597916	0.533956	0.749595	0.763905	0.759353	0.791627	0.11164	0.236526	0.243222	0.218052	0.233761	0.0799205	0.220095	0.174331	0.168964	0.40717	0.0947011	-0.301352	0.127582	-0.181809	0.387783	0.0607832	-0.142606	-0.00310337	0.0192321	-0.221673	0.0779406	-0.0033882	0.801528	0.162863	0.0560458	0.226505	-0.0319755	0.36549	0.378943	0.387856	-0.657655
ECD_03997	putative 4Fe-4S mono-cluster protein	0.482962	0.488769	0.404646	0.468221	0.095824	0.410172	0.458895	0.392362	0.917123	0.256369	0.835146	0.784305	0.713592	0.904179	0.900994	0.907704	0.907821	-0.209015	0.731255	0.726778	0.719626	0.696256	0.540304	0.688533	0.681566	0.676281	0.645485	0.199419	-0.0325839	-0.247541	-0.138673	0.677507	0.677542	0.469279	0.637618	1.77589	0.0271301	0.68972	0.613194	0.57507	0.774983	0.682909	0.481507	0.0199967	1.68313	-0.525307	0.68445	-1.38298
ECD_03308	PanD autocleavage accelerator, panothenate synthesis	0.318581	2.12842	2.03963	2.11396	0.885487	2.12284	2.09045	1.98513	1.80576	-1.09477	1.25714	1.24932	1.11875	1.36315	1.35173	1.366	1.36922	-0.223913	2.17471	2.15755	2.17132	2.14659	1.95071	2.12519	2.11204	2.11193	2.04337	1.52974	0.249556	-0.571754	0.232405	1.47307	1.46994	1.22788	1.3689	1.04192	0.199077	1.48193	2.04887	1.29834	1.60174	1.48813	3.72051	-0.631957	-2.49951	0.751806	1.59336	-0.588377
ECD_02839	putative secretion pathway protein, C-type protein	0.00545009	0.175393	-0.137675	-0.082911	-0.294853	-0.0906235	0.153121	-0.108361	3.71802	0.0984905	0.070398	0.0721939	0.0276656	0.146086	0.125904	0.159586	0.493436	0.188508	0.00186064	-0.0214133	-0.0119346	0.00264069	0.0848552	-0.00754118	-0.0334549	-0.0419481	-0.0279146	0.273647	-0.110483	-0.804197	0.0470617	0.528851	0.267139	0.616721	0.607941	0.402457	-0.0290285	0.277107	0.264503	0.236631	0.336067	0.382039	0.44357	0.0369707	-1.35329	0.601328	0.0327891	0.232296
ECD_04274	response regulator in two-component regulatory system with CreC	0.0384512	0.307876	0.420285	0.268868	-0.225957	0.474407	0.265352	0.418522	0.44556	-0.192788	0.829412	0.391541	0.288898	0.482676	0.51502	0.494401	0.540677	0.0681121	0.380784	0.374591	0.373624	0.473375	0.453801	0.366472	0.646275	0.338216	0.34207	-0.117422	0.156576	-0.202141	-0.00320789	0.326263	0.824557	0.11902	0.592748	0.524917	0.0717465	0.307015	0.41086	1.29229	0.357628	0.396845	1.23616	0.0311143	-0.459946	0.167996	0.546156	0.594178
ECD_00325	microcin Bac7 uptake protein; outer membrane surface-exposed lipoprotein	-0.173411	-0.00746131	-0.0801669	-0.0180464	-0.338008	-0.0453806	0.2238	-0.0854655	3.69583	0.413952	0.306956	0.257681	0.23864	0.353622	0.376405	0.387591	0.372451	0.242091	0.356003	0.356499	0.352817	0.377251	0.263811	0.348034	0.348885	0.320078	0.439741	0.608363	0.115209	-0.477053	-0.28737	0.0865554	0.0211978	-0.0346585	0.0452484	-0.120638	0.135994	0.0494009	0.00667883	0.0814393	0.108577	0.292738	0.0504178	0.0164816	0.0698615	-0.120381	0.211962	-1.16396
ECD_01237	fused glutamine amidotransferase (component II) of anthranilate synthase/anthranilate phosphoribosyl transferase	-0.525604	0.215787	-0.242399	-0.212763	0.0827954	-0.19414	-0.162839	-0.237039	-0.308441	0.282919	0.806766	0.342422	0.299802	0.362872	0.354201	0.365913	0.372963	0.119352	0.269339	0.25342	0.271279	0.277687	0.144731	0.259709	0.251032	0.227722	0.244198	0.115183	-0.200896	-0.00838312	-0.0855938	0.0562975	0.00743431	0.0054348	0.0502154	0.769283	-0.442456	0.0189147	0.0758828	0.0716725	0.0463163	0.0393584	-0.0294424	0.186705	1.05424	-1.08694	-0.0683468	0.493655
ECD_03808	stress-induced protein	-0.0710954	0.167455	-0.108947	0.170749	0.368232	-0.0727289	-0.11413	-0.0939467	3.68749	0.184575	0.0806279	0.590802	0.476463	0.186824	0.189093	0.186421	0.178456	-0.0777564	0.0252578	-0.0060464	0.0162592	0.0166358	0.0224913	0.00172926	-0.0821045	0.119756	-0.109806	0.527358	-0.474038	0.22701	-0.263641	-0.249239	-0.275669	-0.0439395	-0.0559095	-0.0829927	-0.165908	-0.279275	-0.356483	-0.238331	-0.186633	-0.269167	-0.0718777	-0.33337	-0.513939	0.233625	0.0120525	-0.340407
ECD_00866	arginine ABC transporter permease	0.349055	-0.354039	0.0203149	-0.382739	0.307227	-0.368275	-0.370266	-0.433483	1.43189	-0.0977256	-0.598575	-0.585624	-0.635616	-0.572469	-0.576973	-0.558729	-0.56505	0.0290831	-0.337453	-0.367385	-0.351062	-0.343632	-0.467048	-0.362649	-0.397005	-0.250257	-0.111674	0.0738809	0.320945	-0.000930898	-0.077228	-0.495951	-0.445414	-0.0294732	-0.50281	-0.563429	-0.0349788	-0.573346	-0.585496	-0.322699	-0.540229	-0.556041	-0.107047	-0.226269	0.336694	-0.696871	-0.451673	-0.85049
ECD_03753	fused DNA-binding response regulator in two-component regulatory system with GlnL: response regulator/sigma54 interaction protein	0.166887	1.25772	1.10732	1.11342	0.474012	1.05675	1.10436	1.01769	0.96129	0.225459	1.02782	0.921359	1.46286	1.03033	1.02263	1.0295	1.04825	-0.0762993	0.859479	0.817127	0.850254	0.851765	0.646119	0.825556	0.777167	0.762529	0.716732	0.610209	0.117582	-0.198785	-0.107328	0.844715	0.801018	0.960406	0.86079	0.708904	0.126816	0.795832	0.751957	0.692029	0.877796	0.823093	0.721316	-0.201699	0.189392	-0.432542	0.75504	0.12016
ECD_02918	fimbrial protein	0.226847	-0.499925	-0.604786	-0.546411	-0.591834	-0.565573	-0.567098	-0.564524	-0.750167	0.40563	-0.444716	-0.440328	-0.533801	-0.39359	-0.412658	-0.393543	-0.408086	-0.0429244	-0.846857	-0.853446	-0.845038	-0.838888	-0.999878	-0.851677	-0.908029	-0.873996	-0.902252	-1.18148	-0.0100914	0.614475	-0.247516	0.152034	0.46104	-0.00132078	0.0903964	0.649149	0.214787	0.113686	0.0669935	0.0489052	0.138169	0.0478855	0.311702	-0.541181	-3.50144	0.313921	-0.316422	-0.698293
ECD_04357	small predicted membrane protein	-0.0583084	-0.703638	-0.78665	-0.7491	0.35937	-0.720301	-0.731624	3.65834	-0.884063	-0.123232	-0.297554	0.217876	-0.336732	-0.236598	-0.271523	-0.236037	-0.250861	-0.197393	-0.351401	-0.359361	-0.355389	-0.366464	-0.444917	-0.352947	-0.428913	-0.381526	-0.396266	0.246965	-0.377421	0.132323	-0.211381	-0.890379	-0.462313	-0.64054	-0.753256	-0.689427	0.125065	-0.159257	-0.934879	-0.966085	-0.886235	-0.96121	-0.599393	-0.525017	0.140462	-1.43572	-0.706454	0.596485
ECD_t00039	tRNA-Ala	0.352419	-1.92952	-1.98446	-1.96775	-2.2994	-1.98071	-1.93217	-1.99687	-2.06271	0.59904	-2.01264	-1.98741	-2.06617	-1.99179	-1.97798	-1.94899	-1.97323	0.258704	-2.22336	-2.21901	-2.20366	-2.18187	-0.922861	-2.25813	-2.25198	-2.27605	-2.2123	-2.29257	0.135322	0.348185	0.778655	-1.71129	-1.7369	-1.7326	-1.72799	-1.72557	0.188148	-1.72788	-1.69578	-1.7199	-1.73047	-0.36478	-1.75867	0.514453	-4.07866	0.643772	-2.22239	-3.04536
ECD_03897	glucosephosphate isomerase	-0.239712	3.31982	3.24772	3.34549	2.26574	3.26959	3.19944	3.20718	3.05221	-2.01163	2.18585	2.17869	2.21419	2.24695	2.24227	2.22894	2.2565	-2.24932	2.23072	2.18459	2.1953	2.18634	2.27442	2.18384	2.15113	2.12722	2.11573	1.98971	-2.70121	0.0654113	-1.59096	1.71375	1.67743	1.90472	1.61435	1.32161	-1.3171	1.71308	1.59244	1.55494	1.77963	1.65711	1.67295	-0.672739	-0.184323	-0.101707	1.78233	3.65119
ECD_01629	transcriptional repressor, hypoxanthine-binding	-1.03478	-0.102206	-0.123522	-0.0835919	-0.246458	-0.111655	-0.115677	-0.169883	-0.17673	0.483567	-1.0947	-1.09075	-1.10428	-1.08344	-1.08488	-1.04828	-1.06359	-0.526956	-1.33798	-1.32925	-1.313	-1.30278	-1.32201	-1.33144	-1.33165	-1.33936	-1.28438	-1.34448	-1.33464	1.03242	-1.41025	-1.29072	-1.35635	-1.32362	-1.29673	-1.33164	-0.140221	-1.32155	-1.29041	-1.33815	-1.31984	-1.37916	-1.34602	0.178613	3.63987	-2.16522	-1.14105	-0.186643
ECD_01770	D-malate oxidase, NAD-dependent; putative tartrate dehydrogenase	-0.355525	-0.310353	0.455315	-0.317845	-0.616874	-0.323203	-0.320305	0.478497	-0.44151	-0.732251	0.21156	0.186758	0.212019	0.235117	0.25814	0.279419	0.263125	-0.292989	-0.915283	-0.916969	-0.905013	-0.898916	-0.945919	-0.925518	-0.970509	-0.942489	-0.943928	-0.49698	0.0188681	0.0264759	0.0324632	-0.567256	-0.600616	-0.595064	-0.587323	-0.672399	-0.82139	-0.593038	-0.586419	-0.634845	-0.595967	-0.604656	-0.654313	1.93587	3.63406	0.691656	0.0325015	-0.829023
ECD_03976	phosphonate ABC transporter periplasmic binding protein	0.455286	0.646831	0.559799	0.624829	-0.0169185	0.580943	0.799165	0.536188	0.431284	0.296809	0.63987	0.614707	0.514426	0.690688	0.684708	0.692556	2.0953	-0.0816492	0.467345	0.460138	0.450888	1.00783	0.276148	0.441955	0.423726	0.425679	0.396417	0.168915	0.138268	0.185523	-0.371134	0.289284	0.635598	0.63357	0.358242	-0.0254165	-0.0376629	0.676768	0.451371	0.967289	0.367231	0.404288	0.378246	0.132403	-0.0408567	0.755865	0.4198	-0.377365
ECD_00886	regulatory protein for ClpA substrate specificity	-0.0636578	-1.42307	-1.49001	-1.458	-1.44493	-1.17102	-1.43003	-1.496	-1.55477	0.0150478	-1.48417	-1.46298	-1.51465	-1.45465	-1.45922	-1.43502	-1.45499	0.0314871	-1.52381	-1.52441	-1.51399	-1.49503	-1.59758	-1.5256	-1.5532	-1.33003	-0.608221	-1.09237	0.0383248	0.0620683	-0.210776	-0.85771	-1.34899	-0.742353	-1.60548	-1.21467	0.213441	-1.65543	-1.67515	-1.64848	-1.65748	-1.68168	-1.46589	0.40793	1.29365	0.244385	-0.808332	-1.61914
ECD_04102	ribosome-associated UPF0307 family protein	-0.447963	0.894917	0.801327	0.886416	-0.088514	1.22782	0.91122	1.20347	0.672674	-0.854467	1.09964	1.07402	0.982527	1.20903	1.23568	1.24683	1.26559	-0.474278	0.766737	0.766777	0.740206	0.779084	1.0101	0.756271	0.727533	0.70087	0.728342	0.625726	-0.182463	0.141359	-0.561144	0.558003	0.965553	0.554647	0.469155	0.429195	-0.406501	0.743287	0.47205	0.403268	0.597148	0.500926	0.521091	0.193463	-0.871438	-0.924135	0.969576	0.865322
ECD_02334	GNAT family putative N-acetyltransferase	-0.151122	0.52206	0.4527	0.491393	-0.0225495	0.475379	0.489866	0.423987	0.35622	-0.0397494	0.203231	0.225458	0.138456	0.257855	0.25482	0.27073	0.283997	0.252848	0.375637	0.366244	0.374129	0.388767	0.622155	0.357947	0.364368	0.342371	0.386506	0.221555	-0.203557	-0.22142	0.226423	-0.0710414	-0.0955139	-0.149056	0.581703	-0.15827	0.139697	-0.0917801	-0.093408	0.875906	-0.0713789	0.488452	-0.234743	-0.00930712	-1.83427	0.215454	0.645348	0.925341
ECD_00643	acyl-CoA esterase	-0.405874	-0.45376	-0.350348	-0.469756	-0.285136	-0.494868	-0.133915	-0.538273	-0.282468	0.00380175	0.195495	0.173622	0.123822	0.256224	0.252315	0.262938	0.282546	0.0568973	-0.328897	-0.341862	-0.362605	-0.345335	-0.40605	-0.343879	-0.38245	-0.360878	-0.365427	0.0374021	-0.189275	-0.136773	0.133976	0.0564023	0.0118379	-0.0435881	0.0743738	-0.0365223	0.224188	0.011122	0.0717279	0.113164	0.0484007	0.0617011	-0.107571	0.310847	-0.989056	0.236899	-0.50037	0.246145
ECD_04198	SpmB family inner membrane protein	0.207447	0.762281	0.462899	0.500726	3.6201	0.486515	0.494143	0.669944	0.264868	-0.172283	0.34593	0.337661	0.235275	0.428486	0.46092	0.440684	0.486202	0.476585	0.913825	0.904199	0.903592	0.9155	1.25956	0.896493	0.946583	1.04711	1.21231	0.693161	0.641303	0.404987	0.492442	0.630656	0.600834	1.03443	0.733485	0.58749	0.0344499	0.61187	0.503469	0.474903	0.662097	0.565369	0.803955	0.235986	0.18192	-0.264685	0.723823	0.00423641
ECD_01084	DUF177 family protein	-0.493662	-0.125282	-0.18907	3.61861	-0.276052	-0.17733	-0.142884	-0.217453	-0.266016	-0.534319	-0.709217	-0.955198	-0.98715	-0.943085	-0.947199	-0.922836	-0.939252	-0.933221	-0.597288	-0.607568	-0.592992	-0.583009	-0.693636	-0.608689	-0.601703	-0.617573	-0.596431	-0.697845	-0.738014	0.18909	-0.280919	-0.374758	-0.426192	-0.374494	-0.304193	-0.361823	-0.360944	-0.42339	-0.389285	-0.365348	-0.408214	-0.31817	-0.429333	1.61537	0.151195	-0.861698	-0.283142	1.49655
ECD_03276	thiosulfate:cyanide sulfurtransferase (rhodanese)	-0.12275	1.10988	0.863178	0.925577	0.444937	1.14797	0.910656	0.784496	0.645308	-0.0818585	0.608014	1.25174	0.980844	0.722805	0.715112	0.739045	0.741099	0.0517029	0.73401	0.726757	0.734003	0.817249	0.957938	0.693636	0.654517	0.662866	0.614815	0.719276	-0.2171	-0.0175449	-0.11337	0.735108	1.61195	0.485697	0.628642	0.830788	0.0130735	0.735592	0.631701	0.605813	0.850611	0.717947	0.451307	0.0513276	0.280679	0.493971	0.543056	-0.0740465
ECD_00120	spermidine synthase (putrescine aminopropyltransferase)	0.144927	0.0307505	-0.00737743	0.00728934	0.0462978	0.00820031	0.0138218	-0.0377986	0.242319	0.0845427	0.652175	-0.0226187	-0.0902928	0.0530656	0.0513733	0.0587566	0.0679996	0.00973801	-0.00388742	0.00279715	1.63336	0.0116524	-0.100374	-0.0101626	0.0125459	-0.0556648	-0.0231105	-0.302437	0.287869	-0.0713362	-0.00224736	0.371142	-0.103522	0.26929	0.0601601	-0.209307	-0.0895066	-0.0743882	-0.137482	0.303933	-0.0299782	-0.160485	0.460335	-0.573269	-2.93897	0.115618	0.217211	0.36139
ECD_01951	colanic acid biosynthesis protein	-0.187178	0.121218	0.0680679	0.107687	3.60715	0.114729	0.097974	0.0530703	-0.00217566	0.0453604	0.0377772	0.0402939	-0.0122391	0.0644775	0.0565965	0.0879248	0.0781814	0.29315	0.460263	0.415523	0.444001	0.458143	0.62211	0.447383	0.448548	0.442077	0.471772	0.309072	0.286258	0.390968	-0.0132288	0.175059	0.132267	0.137996	0.160201	0.1419	0.307482	0.14765	0.120154	0.111849	0.179538	0.113209	0.0548939	-0.325684	-0.770524	-0.242377	0.327969	-0.649415
ECD_03727	aerobic ubiquinone synthesis protein, SCP2 family protein	-1.04509	1.83181	1.72062	1.80336	0.590765	1.74256	1.71022	1.72149	2.10242	-1.31602	1.17894	1.15917	1.10497	3.60428	1.28973	1.29222	1.31935	-0.443651	1.91381	1.8851	1.9026	1.91169	1.6872	1.8895	1.82654	1.83582	1.75828	1.24637	-0.354734	0.186044	-0.34891	1.68749	1.63589	1.39121	1.55311	1.20541	-1.32339	1.6291	1.5589	1.71635	1.74214	1.84931	1.4593	-0.713796	-0.989547	-0.102438	1.47849	0.338918
ECD_00690	fused 2-O-a-mannosyl-D-glycerate specific PTS enzymes: IIA component/IIB component/IIC component	0.208747	0.562145	0.528302	0.536902	0.0343383	0.543927	0.55109	0.694767	0.365363	-0.360146	0.339872	0.285586	0.264852	0.371656	0.36803	0.365266	0.390064	0.369244	0.655941	0.64045	0.638934	0.645566	0.754232	0.639177	0.803216	0.602902	0.624321	0.578683	0.34924	-0.0103328	-0.347423	0.217539	0.193272	0.296741	0.226076	0.188257	-0.124504	0.19659	0.193247	0.346476	0.228283	0.206564	0.139	-1.66383	-1.762	0.147792	0.472493	0.677021
ECD_01459	putative oxidoreductase	0.475633	0.616951	0.597846	0.659158	0.861775	0.603153	0.627852	0.547289	0.524174	1.06335	1.09647	1.0946	1.06019	1.12932	1.12949	1.12904	1.15204	0.684674	0.728349	0.759592	0.770058	0.741792	1.02964	0.758529	0.742775	1.31285	0.801822	0.778248	0.702574	-1.36385	0.316634	0.431926	0.35759	0.37479	0.383051	0.677149	-0.425681	0.36702	0.413181	0.376943	0.40454	0.350169	0.755102	1.25607	0.45816	-1.7019	0.22195	0.345592
ECD_03769	putative transcriptional regulator for sulfoquinovose utilization	-0.0973871	0.872949	0.873468	0.842035	0.558391	0.785891	0.756187	1.04157	0.736641	-0.300465	0.384416	0.386202	0.301232	0.502313	0.4957	0.484033	0.51123	-0.239772	0.67309	0.631423	0.658556	0.852503	0.645247	0.629209	0.665194	0.575284	0.620571	0.272442	-0.209567	0.111513	-0.0364295	0.583818	0.512496	0.330773	0.376849	0.126313	-0.205971	0.585974	0.477172	0.33318	0.595953	0.611077	0.6363	-0.517702	0.690788	0.247622	0.601026	3.59537
ECD_03932	putative inner membrane protein	-0.0616863	-0.0743605	-0.176508	-0.0954043	-0.0503197	-0.18264	-0.160419	-0.184649	-0.311548	0.291876	-0.117548	-0.143437	-0.227522	-0.0551301	-0.0595509	-0.0406041	-0.0555951	0.130417	-0.189098	-0.217454	-0.207895	0.406323	-0.373623	-0.219453	-0.262866	-0.267731	0.317447	-0.0794841	-0.104139	-0.0640244	0.395025	-0.121885	-0.166452	-0.389997	-0.226771	0.697584	0.168884	-0.143243	-0.222665	0.40603	-0.0696764	-0.196259	2.29137	0.138959	-1.71019	-0.0146007	-0.283288	-0.346849
ECD_00194	tRNA-Thr(GGU) m(6)t(6)A37 methyltransferase, SAM-dependent	-0.478615	0.0629359	0.0234476	0.0397355	1.13917	0.0458874	0.0460786	-0.00300266	0.194026	0.107126	0.358703	0.368724	0.29915	0.445059	0.438442	0.450165	0.468176	-0.516114	0.187628	0.19845	0.193257	0.207852	0.114538	0.196603	0.174751	0.156053	0.195463	-0.0775507	-0.346434	-0.118583	0.549635	0.146356	0.118218	0.0786867	0.0986546	-0.0591671	-0.202559	0.147905	0.0847264	0.0503202	0.174847	0.0606598	0.203007	-0.264856	0.10585	0.535859	0.0345699	0.309574
ECD_03434	putative L-xylulose 5-phosphate 3-epimerase	0.10568	-0.459185	-0.661415	-0.490464	-1.5515	-0.48303	-0.0686294	-0.603165	-0.220818	0.442073	-0.379264	-0.358912	-0.450228	-0.197029	-0.191816	-0.190266	-0.179958	0.506089	-0.0760339	-0.0901781	-0.102303	-0.0794938	-0.335263	-0.131893	-0.243282	-0.0675501	-0.306059	-0.784436	0.0440976	0.273097	-0.0715116	0.27498	-0.233949	0.24484	-0.412679	0.0120046	0.219458	3.59185	0.394882	0.189508	-0.0979823	-0.244815	0.0935778	0.0180965	-0.202284	-0.160606	-0.360747	-1.47638
ECD_01045	OPG biosynthetic periplasmic beta-1,6 branching glycosyltransferase	-1.10018	1.01612	0.966252	0.966235	0.689039	1.0017	0.984221	0.936638	0.87593	0.586144	1.55104	1.5644	1.50255	1.60568	1.59165	1.57849	1.63906	-0.629873	0.914464	0.892869	0.909108	0.906259	1.52724	0.90404	0.894968	0.903822	0.917947	1.2045	0.438267	0.152292	0.210978	1.49763	1.07094	1.11286	1.14936	1.11933	0.275483	1.06592	1.0923	1.10967	1.09183	1.09738	1.04094	1.33343	-1.03165	1.45273	0.94035	0.0276168
ECD_01826	myristoyl-acyl carrier protein (ACP)-dependent acyltransferase	-0.761643	2.68571	2.66044	2.68504	2.31765	2.70834	2.59799	2.56773	2.53943	-0.584309	1.73708	1.73595	1.67665	1.78212	1.77403	1.75989	1.85089	-0.779267	0.87131	0.833118	0.853595	0.859687	0.844579	0.849181	0.864376	0.859324	0.87824	0.676302	-3.70892	0.769321	-0.329858	1.27477	1.24045	1.28249	1.29409	1.21676	-1.23704	1.23722	1.24872	1.22255	1.27035	1.24374	1.20138	0.603023	-0.0779767	0.40227	1.59663	0.608738
ECD_01167	murein tetrapeptide carboxypeptidase; LD-carboxypeptidase A	-1.38688	-0.440188	-0.525169	-0.559494	-0.646284	-0.515871	-0.435797	-0.525007	-0.545872	-0.310153	-0.582112	-0.531817	-0.566166	-0.531623	-0.53828	-0.512641	-0.517892	-1.5994	-0.383973	-0.397474	-0.372599	-0.36095	-0.431108	-0.389487	-0.374771	-0.4093	-0.359668	-0.369275	0.67152	-0.366178	0.132863	-0.163124	-0.212929	-0.126026	-0.127264	-0.0971584	-0.346219	-0.204644	-0.153933	-0.117097	-0.194907	-0.157795	-0.147073	-1.14121	3.58759	-1.63336	-0.0848524	-0.531669
ECD_00995	putative 4Fe-4S membrane protein	-0.432095	-0.155363	0.099709	-0.220244	-0.0865676	-0.189074	-0.191808	-0.25414	-0.302489	0.441425	0.062747	0.0729129	0.036773	0.0955962	0.0922481	0.10283	0.0987754	-0.226557	-0.302494	-0.318041	-0.300449	-0.291595	-0.423917	-0.305036	-0.334135	-0.332123	0.358338	-0.453366	0.00513396	0.727778	0.311242	-0.126624	-0.173699	-0.154793	-0.10693	-0.163687	-0.198354	-0.195299	-0.149695	-0.146159	-0.155433	-0.142142	0.63622	-0.0641223	-1.12252	-1.76872	-0.0713776	-0.374866
ECD_04051	UPF0719 family inner membrane protein	-0.675518	0.534698	0.480213	0.494295	-0.356831	0.50145	0.54562	0.449115	0.331642	0.201895	0.776383	0.722391	0.669421	0.8525	0.873839	0.860976	0.880271	-0.741888	0.389724	0.392549	0.378239	0.36467	0.2317	0.348906	0.335371	0.314369	0.29529	-0.141869	-0.667721	0.539626	0.308297	0.685795	0.685348	0.513682	0.640589	0.450582	-0.558939	0.688148	0.643917	0.604848	0.782579	0.719488	0.531849	0.0631378	-2.95992	-1.11513	0.487021	-1.21513
ECD_00361	Nrd regulon repressor	0.429301	0.9469	0.86112	0.919569	0.23939	0.925942	0.909477	0.863431	0.791522	0.508253	0.358876	0.316599	0.309899	0.393688	0.396143	0.418846	0.414471	0.138752	-0.304696	-0.302192	-0.298908	-0.276899	-0.378016	-0.310506	-0.310672	-0.174596	-0.307963	0.325507	-0.0487146	-0.0961599	0.277902	0.0274441	-0.175222	-0.00281235	-0.195475	-0.336882	-0.246625	0.0344887	-0.204813	-0.269116	-0.115163	-0.211902	-0.368342	-0.0584377	0.838479	-0.511747	-0.542537	0.0238061
ECD_02291	response regulator activating yhjX; pyruvate-responsive YpdAB two-component system	0.292811	0.26543	0.492685	0.229574	0.727066	0.22037	0.834892	0.182903	0.0900189	0.785012	0.930486	0.111339	0.0229279	0.122774	0.129394	0.144821	0.14805	-0.166893	0.284819	0.278651	0.288411	0.30412	0.45249	0.250699	0.264327	0.234355	0.294795	0.328922	-0.0710787	-0.0606186	-0.0605538	1.13605	0.310172	0.285514	0.327088	0.526754	0.085258	0.321577	0.320707	0.287664	0.325417	0.583967	0.230171	0.261162	-0.39369	-0.408233	0.683297	0.641274
ECD_01279	4-aminobutyrate aminotransferase, PLP-dependent	0.0660119	0.0197602	-0.0391794	-0.0341476	-0.342263	-0.0376148	0.0447725	-0.0697572	-0.113866	0.193035	0.205398	0.210164	0.173201	0.22611	0.219974	0.23659	0.241913	-0.297985	-0.311684	-0.314703	-0.280344	-0.288122	-0.40582	-0.291941	-0.325246	-0.331563	-0.316319	-0.452293	0.415078	-0.148162	0.765741	0.694381	0.309572	0.308774	0.354182	0.267458	0.456117	0.320288	0.376358	0.36844	0.349226	1.39238	0.254189	-0.458449	-1.23112	1.44143	0.424462	-0.165404
ECD_03717	putative carboxymethylenebutenolidase	-0.0132415	0.231138	-0.169732	-0.0670917	-0.506887	0.0670329	-0.0781986	0.0125954	-0.234124	0.120639	0.0217295	0.0131184	0.290189	0.331902	0.160049	0.171272	0.188078	0.00532297	-0.0882055	-0.114861	-0.0953477	-0.0868294	-0.182901	-0.113239	-0.172161	-0.167111	-0.251766	0.0567628	-0.18262	-0.0540295	0.102683	-0.0871254	-0.0673366	0.0955713	0.0585951	-0.108121	-0.0187303	-0.131845	0.440293	-0.114976	-0.0180152	0.053612	0.0891414	0.179493	-0.0903143	0.146415	-0.0772922	-0.207883
ECD_02021	D-tagatose 1,6-bisphosphate aldolase 2, subunit	-0.112779	-2.40351	-2.46609	-2.42806	-2.73597	-2.42796	3.4476	-2.45979	-1.63622	0.185251	-1.96536	-1.96185	-2.00724	-1.93125	-1.93396	-1.89464	-1.95558	0.103417	-2.32288	-2.34939	-2.3121	-2.31236	-1.80841	-2.34126	-2.36804	-2.34626	-2.34431	-2.00392	0.0106565	-0.149332	0.200039	-2.13764	-2.14547	-0.749243	-2.14206	-2.17594	0.23909	-2.11551	-1.63956	-2.14759	-2.10509	-1.69747	-1.58932	1.29322	-0.0996141	1.00489	-2.29392	0.0837345
ECD_02522	cyaR sRNA-regulated protein	-0.0378267	3.53339	3.29011	-0.0355545	2.75849	-0.0507869	-0.0415011	-0.120644	3.21644	0.0668924	3.13302	0.183	-0.052715	0.0432124	0.0502772	0.058319	0.0692631	-0.1413	-0.114739	-0.119321	0.0227232	-0.113319	-0.196056	-0.121888	-0.156385	-0.148059	-0.121382	0.33673	0.0751407	-0.168962	0.0126778	-0.074995	-0.122204	-0.168529	-0.105526	-0.210923	-0.0309042	-0.114135	-0.11175	-0.138887	-0.0951178	0.281568	-0.0976596	-0.12279	-0.574781	-0.0803081	-0.0843327	-0.714823
ECD_00909	ribosomal protein S12 methylthiotransferase accessory factor	0.129524	0.144295	0.0776289	0.0981295	-0.0386943	0.123912	0.523921	0.0686512	0.411343	0.765415	0.635882	0.657219	0.60462	0.680964	0.673516	0.674077	0.69727	0.0581067	0.212362	0.175599	0.186485	0.201738	0.272187	0.20277	0.172168	0.196026	0.19081	0.228405	-0.393317	-0.296109	-0.307003	-0.391849	-0.43581	-0.471146	-0.376467	-0.217222	-0.570111	-0.432154	-0.445449	-0.421009	-0.405784	-0.439528	-0.521387	0.280873	1.10055	0.0330285	0.697845	-0.140693
ECD_00670	NIF3 family metal-binding protein	0.0466027	-0.0416393	-0.0784083	-0.0678731	0.485678	-0.0682097	0.518577	-0.122923	-0.227003	-0.205279	-0.229854	-0.256441	-0.289895	-0.199235	-0.198057	-0.185229	-0.178879	-0.00132142	-0.321552	-0.336201	-0.34035	-0.341302	-0.454143	-0.348044	-0.414303	-0.377208	-0.381819	0.44113	0.174651	0.305255	0.0507798	-0.481268	-0.457028	-0.507788	-0.466391	0.084269	0.00608494	-0.443952	3.37878	3.53294	-0.425652	-0.48397	-0.597314	-0.351528	-2.2308	0.192499	-0.049653	-1.27167
ECD_04266	trifunctional protein: nicotinamide mononucleotide adenylyltransferase, ribosylnicotinamide kinase, transcriptional repressor	0.0146325	1.43739	-0.180974	1.44581	0.823041	0.941549	1.45094	1.08248	1.29907	0.144539	1.91519	0.118061	1.88005	3.52916	1.24598	0.152364	1.50234	0.225897	0.0993059	0.0935714	0.0925336	0.106231	-0.0255144	0.0853946	0.177308	0.0564227	0.188036	-0.399187	-0.0212968	0.0655761	0.117783	0.192815	-0.0690657	-0.188484	-0.0912454	0.0477075	-0.0189159	1.15329	0.68428	0.873534	-0.115439	0.0997134	0.493094	-0.376137	0.0635198	0.209752	1.51749	-0.109626
ECD_01381	OPG biosynthetic periplasmic protein	0.282463	0.16298	0.434414	0.150089	0.680121	0.136729	0.165154	0.0886673	1.86041	0.220181	2.91255	-0.0386877	-0.316291	-0.264807	-0.271159	-0.251744	-0.253297	-0.016678	0.0294247	0.0391275	0.0494898	0.248096	0.0204923	0.0380663	0.0706013	0.0181462	0.253277	-0.00984408	0.584357	-0.141717	-0.240845	-0.418312	-0.489347	-0.312858	-0.451936	-0.510329	-0.0368516	-0.354732	-0.450153	-0.428935	-0.449072	-0.0362323	-0.0518083	0.646347	0.929488	-0.367139	-0.210949	1.54679
ECD_01168	lytic murein endotransglycosylase E	0.198697	-0.0467758	-0.130565	-0.167541	-0.256758	-0.12055	-0.0473326	-0.13507	-0.155596	-0.447361	-0.914132	-0.863523	-0.894777	-0.867405	-0.872691	-0.842187	-0.858769	0.0324357	-0.495118	-0.507508	-0.48278	-0.470633	-0.541122	-0.499656	-0.488106	-0.521251	-0.471936	-0.480899	0.282142	0.0174917	-0.656208	-0.566349	-0.612103	-0.531271	-0.535443	-0.503212	-0.0191958	-0.600798	-0.547419	-0.51056	-0.597076	-0.560567	-0.547742	0.219252	3.51252	1.40613	0.0297643	-0.419214
ECD_03119	global DNA-binding transcriptional dual regulator	-1.77524	2.44233	2.38038	2.38665	1.46019	3.49556	2.37297	2.31123	2.19172	-0.498672	2.67975	2.64522	2.53985	2.73852	2.71582	2.72688	2.77657	-0.975445	2.5785	2.54837	2.55955	2.55372	2.41457	2.5691	2.56025	2.54594	2.54293	2.78697	-1.71946	-0.254071	-0.601511	2.20411	2.17388	2.05024	2.12827	1.91329	-1.58514	2.15365	2.07754	2.01967	2.22603	2.1717	1.96658	-3.07498	-1.29884	-0.709577	2.44606	1.62078
ECD_00841	hypothetical protein	0.074711	-0.0281439	0.552787	-0.0599268	-0.423839	-0.0431272	-0.0373712	-0.085844	-0.155513	0.0962323	-0.196458	-0.193008	-0.258548	-0.181798	-0.187551	-0.16438	-0.16441	0.226195	-0.388114	-0.395573	0.154842	-0.382265	-0.467722	-0.395476	-0.428569	-0.406269	-0.398902	-0.571702	0.208688	0.184001	-0.09537	-0.158463	-0.413022	-0.235064	-0.344027	0.385108	0.0396014	-0.407719	-0.428171	-0.385968	-0.402074	-0.383094	-0.529062	0.353494	1.42882	0.374441	-0.440139	0.252273
ECD_01802	RNA chaperone, putative ProP translation regulator	-0.269365	0.108162	-0.116129	-0.44199	0.355741	-0.225546	0.0428279	-0.521946	-0.556135	0.0846503	-0.789327	-0.785325	-0.819387	-0.774642	-0.770967	-0.744163	-0.756634	0.121885	-1.05896	-1.06682	-1.0477	-1.0381	-1.08022	-1.06211	-1.08412	-1.07964	-0.360769	-1.2338	0.14129	0.118181	0.132606	-0.388073	-0.698476	-0.399528	-0.671115	-0.20431	0.213446	-0.684772	-0.561426	-0.596444	-0.591399	-0.615803	-0.748628	1.82321	2.17154	0.067428	-0.705513	0.776437
ECD_03425	putative hydrogenase, 4Fe-4S ferredoxin-type component	0.745642	1.15921	0.954026	1.1081	1.30839	1.09659	1.10402	0.987373	0.844226	-0.548914	1.43844	1.47189	3.4857	1.63625	1.63575	1.63355	1.66422	0.0656732	1.15759	1.13935	1.13601	1.15398	0.929856	1.1018	1.02053	1.04664	0.962577	0.402537	0.805411	-0.310362	-0.268476	0.430503	0.408763	0.164307	0.2535	0.655191	-0.451302	0.428235	0.3141	1.1083	0.542607	0.424561	0.247011	-1.03072	-3.16678	-0.294211	0.64758	-1.23309
ECD_03265	DNA catabolic protein	-0.275697	-0.338258	-0.421333	-0.358356	-1.47198	-0.358034	-0.356926	0.61766	-0.334155	0.183556	3.48513	0.117152	-0.557426	-0.257638	-0.263436	-0.240094	-0.248593	-0.160074	-0.268897	-0.272486	-0.263068	-0.266322	0.314493	-0.271888	-0.324319	-0.30809	-0.258244	-0.807615	0.0253722	0.10016	0.216364	-0.187225	-0.371643	0.340523	-0.477074	-0.356893	0.260557	-0.139087	-0.440667	-0.55934	-0.265201	-0.376475	-0.411242	0.708043	0.549776	-0.516269	-0.176709	-0.147184
ECD_00778	glutamine transporter subunit	-0.342211	0.00154767	-0.0473974	0.013333	0.416592	-0.0085637	0.00184654	-0.089671	-0.177713	0.135248	-0.00784532	-0.0449119	-0.0810813	0.0167905	0.00333711	0.0151794	0.0317512	-0.474091	-0.0391636	-0.0449233	-0.047175	-0.0376115	0.188168	-0.0467604	-0.0816684	-0.0617385	-0.0557056	-0.0918746	0.170435	0.0178673	-0.133278	0.119906	0.600138	0.476821	0.16518	0.209477	0.0911959	0.0890825	0.0645879	0.472954	0.121041	0.607131	0.150059	-0.193956	1.22477	0.379879	0.493365	-1.08627
ECD_01590	maltose and glucose-specific PTS enzyme IIB component and IIC component	0.252865	-0.968586	3.1893	-0.971351	0.403971	-0.99262	3.47848	-1.03168	0.147009	-0.177316	-0.951369	-0.947218	-0.966521	-0.927316	-0.921915	-0.902358	-0.909004	-0.026204	-0.535601	-0.525577	-0.515808	-0.516925	-0.109349	-0.527324	-0.531171	-0.552993	-0.510202	-0.701117	0.208842	-0.196475	-0.794748	-0.644454	-1.31555	-0.749511	-1.26449	-0.988439	-0.277532	-1.22883	-1.27412	-1.10721	-1.2077	-0.94221	-1.31237	0.397483	1.22616	-0.314915	-0.803613	0.136363
ECD_01980	multidrug efflux system, subunit B	0.377685	0.942886	0.88985	0.912309	0.606957	0.933079	0.907667	1.09254	0.799976	-0.286768	0.895086	0.892376	0.833951	0.946191	0.937128	0.955165	0.945436	0.392069	1.29711	1.25349	1.29278	1.28466	1.25151	1.2637	1.28457	1.2858	1.29212	1.10996	0.309399	-0.356921	-0.281118	0.653909	0.638308	0.779263	0.655983	0.621869	-0.164096	0.662283	0.622336	0.768103	0.682259	0.612586	0.514882	-0.719672	1.69335	0.270743	1.0471	1.1571
ECD_03017	outer membrane lipoprotein	-0.0341238	3.11884	3.04886	3.04739	2.14646	3.08755	2.99011	2.94832	2.85117	0.844804	3.14247	3.16767	3.02825	3.26747	3.23649	3.21958	3.29849	1.15171	2.63253	2.60255	2.60975	2.62349	2.45065	2.60302	2.58154	2.57012	2.57172	2.23531	-1.62522	-0.864897	0.105558	2.05417	2.00479	2.79844	2.00943	1.73118	-1.26758	1.9972	1.98058	1.88522	2.06163	2.00035	1.86197	0.231777	-1.56925	-0.470657	2.4518	0.151311
ECD_00774	23S rRNA m(6)A1618 methyltransferase, SAM-dependent	0.390103	0.377036	0.324924	0.377266	-0.0462042	0.349054	0.375451	0.2861	0.196732	-0.481536	0.00781447	-0.0330009	-0.0743231	0.0279101	0.0189843	0.027534	0.0451287	-0.719442	0.253821	0.244487	0.252754	0.267943	0.149747	0.243081	0.222104	0.237856	0.245692	0.0604908	0.7484	0.655159	0.190582	0.164567	0.152941	0.116609	0.209102	0.0911518	0.117111	0.161816	0.110593	0.119005	0.168322	0.145928	0.016936	0.506626	2.3374	3.46068	-0.51182	-1.66744
ECD_02681	DUF903 family verified lipoprotein	0.703569	-1.34017	-1.43163	-1.38989	-0.189855	-0.341178	-0.947945	-1.41083	-0.849823	0.285188	-1.34553	-0.698891	-1.40922	-1.29764	-1.31122	-1.27158	-1.30756	0.302815	-1.34407	-1.34543	-1.34274	-1.33733	-0.244101	-1.33923	-1.38885	-1.38115	-1.38195	-0.412287	0.0129905	-0.183453	-0.0216222	-0.802725	-1.96231	-0.951546	-1.98996	-1.71927	-0.43648	-1.26436	-1.96214	-1.21158	-1.92438	-1.96922	-0.705882	0.253356	-0.543948	0.15991	-1.58393	0.899633
ECD_03499	orotate phosphoribosyltransferase	0.379545	0.817104	0.867307	0.786194	1.23931	0.774157	0.80662	0.718823	3.44336	-0.151366	0.337044	0.381558	0.282585	0.589115	0.598604	0.583356	0.568264	0.0625992	0.441241	0.434539	0.428005	0.452057	0.323242	0.413735	0.473449	0.342999	0.243515	0.379452	0.0551731	0.0578152	-0.334905	-0.0875074	0.163311	-0.407178	-0.131187	-0.481137	-0.165693	-0.0942592	-0.077203	0.247154	0.00347178	-0.0851657	0.29575	-0.461917	-1.09768	0.125701	0.419284	-0.930062
ECD_02427	stationary phase inducible protein	0.130665	-0.0131799	-0.11202	-0.0517953	0.0441096	0.0625318	-0.0293961	-0.127958	0.179665	-0.173251	0.0626662	-0.171341	-0.200192	-0.0942238	-0.0997358	3.44124	0.029568	-0.214026	-0.211996	-0.216465	-0.208827	-0.192989	-0.0759644	-0.222835	-0.222356	-0.238876	-0.200208	-0.270248	-0.0475485	0.00635504	-0.104179	-0.249179	-0.29537	-0.193762	-0.26311	-0.364549	-0.368346	-0.275477	-0.256779	-0.218329	-0.264795	-0.317979	-0.28983	0.00658261	-0.591626	-0.436426	-0.114808	0.950642
ECD_03008	galactosamine-6-phosphate isomerase	-0.322513	-0.407429	2.54086	-0.257905	0.241052	0.0862119	-0.470096	-0.520255	-0.607143	-0.0950657	-0.454268	-0.449995	-0.570677	-0.371755	-0.377943	-0.371478	-0.374831	-0.0141345	-0.506189	-0.544767	-0.535295	-0.524217	-0.689171	-0.533816	-0.357914	-0.302715	-0.272572	-0.587126	0.264973	0.12456	0.191406	-0.0108506	-0.270921	-0.688167	-0.582383	-0.427714	0.148333	-0.562173	0.22722	-0.350562	-0.530218	-0.593181	-0.0543871	0.344175	-0.808259	-0.658339	-0.113514	-0.401545
ECD_01850	putative flagellar export pore protein	0.0246975	-0.907403	-0.779185	-0.900443	1.13966	-0.695439	3.43253	-0.969276	-0.811944	0.171156	-0.879559	-0.875365	-0.910058	-0.867321	-0.859362	-0.831408	-0.85438	0.0526993	-0.940773	-0.952332	-0.94094	-0.917229	-0.949682	-0.946721	-0.968948	-0.964074	-0.929241	-0.863203	0.263934	-0.100912	0.0778167	-0.649063	-0.955513	-0.178461	-0.940142	-1.02967	0.349364	-0.972146	-0.965298	-0.998505	-0.702069	-0.97928	-1.05512	-0.13423	1.3272	0.141979	-0.962376	-1.69664
ECD_02215	glutamate-pyruvate aminotransferase; glutamic-pyruvic transaminase (GPT); alanine transaminase	0.0381695	-0.0169668	-0.0946941	-0.0517774	0.293054	-0.0594391	3.42502	-0.103186	-0.0917703	-0.123672	-0.126384	-0.12282	-0.172776	-0.0888494	-0.0887316	-0.0682684	-0.0837287	-0.0394725	-0.265497	-0.274466	-0.246604	-0.264045	-0.346379	-0.299343	-0.27075	-0.306968	-0.266141	-0.246722	-0.160028	0.0795734	-0.302482	-0.565667	-0.738425	-0.746508	-0.711852	0.0297782	-0.334235	-0.720703	-0.734263	-0.35383	-0.732335	-0.719651	-0.481161	0.434037	-0.393946	0.365428	-0.300731	0.147026
ECD_03918	transcriptional repressor, Zn(II)-binding	0.346273	0.818619	1.36721	0.715978	0.644399	2.62754	3.42226	0.720984	2.14485	-0.223505	0.00399081	-0.00930542	3.32637	0.0420424	0.0438111	0.0509925	0.0503879	-0.0782284	0.0765979	0.0404596	0.058532	0.0645829	-0.0980012	0.0547753	0.0896596	-0.0131379	0.0250001	0.258017	-0.249392	0.203531	0.0524663	0.405539	0.366179	0.180746	0.439064	0.858627	-0.312797	0.0743948	0.320012	0.11441	0.149041	0.00823981	0.404172	0.0982107	-0.175947	-0.088059	0.141171	1.73545
ECD_02615	putative flavoprotein	-0.255195	0.545346	0.510982	0.514345	0.691423	0.969942	0.763027	0.473971	0.413458	0.332256	0.855736	0.853956	0.802085	0.907145	0.894021	0.924554	0.933024	-0.345902	0.365729	0.37263	0.366049	0.360957	0.613227	0.371048	0.567091	0.333376	0.510079	0.554564	-0.0730871	-0.102197	0.0389321	0.35822	0.328944	0.730587	0.344009	0.450931	0.220461	0.341627	0.319391	0.511206	0.381897	0.337811	0.408894	0.18762	0.681849	0.194936	0.472088	0.136561
ECD_02326	furfural resistance protein, putative short-chain oxidoreductase	0.332296	0.00902295	-0.0528383	0.003391	-0.529519	0.143725	-0.0163885	0.118154	-0.134037	-0.199458	-0.11324	-0.0976602	-0.183703	-0.0761337	-0.0647158	-0.0495346	-0.0535788	0.292807	0.180507	0.173745	0.173016	0.476225	0.446041	0.153569	0.158022	0.136858	0.174805	0.0186062	0.243258	0.0841527	0.0452393	-0.0367528	-0.0679128	-0.109089	0.706535	0.0909355	0.166868	-0.0649756	-0.0653514	0.120018	-0.0457731	0.0522202	0.501957	0.384018	1.4341	0.39299	-0.0858814	-0.129723
ECD_03611	phosphate ABC transporter permease	-0.302478	0.934289	0.799428	1.16794	0.580834	0.88936	1.25316	0.852594	0.841279	-0.275626	1.01271	0.982788	0.943907	1.23039	1.22924	1.21113	3.40271	0.0161088	1.38145	1.36413	1.37243	1.38615	1.17137	1.35234	1.40957	1.32062	1.55254	1.25908	-0.530029	-0.0663185	-0.199269	0.817321	1.31981	0.463885	0.896101	0.757086	-0.413329	1.06483	0.833761	1.23356	0.889059	1.31321	1.03364	0.412917	-0.617496	-1.18813	0.99208	0.892364
ECD_03107	dTTP/UTP pyrophosphatase; m(5)UTP/m(5)CTP/pseudo-UTP pyrophosphatase	-0.0785275	0.815997	1.04092	0.761951	0.191378	0.979312	0.762938	0.677593	0.89869	-0.00817269	0.374841	0.346174	0.374862	0.428461	0.409297	0.442776	0.447277	0.146395	0.791954	0.775097	0.785349	3.40017	0.864001	0.787511	0.757313	0.770135	0.802835	0.562068	0.382089	0.219484	0.029257	0.530074	0.819841	0.358907	0.525821	0.385304	-0.386779	0.520644	0.533459	0.850074	0.464106	0.580233	0.309168	-0.630836	-0.134348	-0.815945	0.708988	-0.211654
ECD_00244	PaoABC aldehyde oxidoreductase, FAD-containing subunit	-0.10508	0.372024	0.328242	0.338829	0.183952	0.352703	0.347451	0.3032	0.126329	0.388873	2.95725	0.852699	0.777132	0.908803	0.905522	0.914398	0.941635	0.0612571	0.762834	0.753805	0.76268	0.773276	0.666409	0.751187	0.738037	0.711625	0.721709	0.459738	-0.00878219	0.0234652	0.294183	0.77863	0.960199	1.35733	0.750852	1.10219	0.0579529	0.751638	0.710007	3.39888	0.796313	0.953494	0.613544	-0.0160445	0.338425	0.644621	0.955305	0.503958
ECD_01897	ssuEADCB/tauABCD operon transcriptional activator	-0.391706	0.507118	0.471424	0.514974	1.66971	0.514303	0.483986	0.454901	0.395235	0.892871	0.587459	0.586688	0.522039	0.612684	0.6063	0.627582	0.629992	0.126129	1.64816	1.6056	1.61757	1.63109	1.61497	1.60659	1.66128	1.64169	1.66624	1.96332	0.282468	-0.290705	-0.31664	0.49154	0.447426	0.455095	0.471816	0.441643	0.461159	0.9079	0.438415	0.417421	0.495678	0.425578	0.358504	0.191372	2.08955	0.67933	0.579155	1.06052
ECD_03899	extracellular polysaccharide production lipoprotein	-0.328872	-0.254476	-0.331766	-0.272649	-0.0444565	-0.00908832	0.570515	-0.32817	-0.130302	0.166913	-0.105952	-0.11494	0.224603	-0.0620047	-0.0622276	-0.0589534	0.900134	0.372956	0.179741	0.140604	0.143689	0.142842	-0.0209039	0.138891	0.356851	0.0648108	0.0580987	0.327233	-0.123506	0.269271	0.18393	0.245986	0.00482822	0.670156	0.559025	0.69102	0.230335	0.0433394	0.655313	-0.111221	0.100903	0.143221	-0.197957	-0.242054	0.610232	0.856727	-0.670995	-0.51973
ECD_00768	putative dehydrogenase	0.178528	0.367119	0.311078	0.369406	0.621432	0.336736	0.361767	0.640935	0.36951	0.195271	0.575326	0.533476	0.493524	0.600235	0.584139	0.596784	0.611126	0.282963	0.420843	0.415066	0.416181	0.432269	0.315814	0.413236	0.395448	0.394147	0.410133	0.387141	-0.0431237	0.307069	0.26918	0.190072	0.184539	0.14619	0.907681	0.154801	-0.268735	0.19618	0.167015	0.157257	0.202288	0.6154	0.0575268	-0.120706	-0.700412	0.719231	0.462997	0.0370971
ECD_00622	glutamate/aspartate ABC transporter permease	-0.166195	-0.82425	-0.885192	-0.851278	-0.300396	-0.852845	-0.84375	-0.887935	-0.992661	-0.243359	-0.587988	-0.616705	-0.662441	-0.508198	-0.512278	-0.525136	-0.491828	0.0906043	-0.620615	-0.630975	-0.641964	-0.625061	-0.765927	-0.633015	-0.659642	-0.639915	-0.680634	-0.924219	-0.316669	-0.0920296	0.146067	-0.625847	-0.636923	-0.440166	-0.61347	-0.687704	0.258221	-0.616038	-0.610735	-0.688569	-0.586535	-0.401872	-0.558028	0.130497	-2.65518	-0.275596	-0.42278	-0.0427875
ECD_00238	outer membrane phosphoporin protein E	0.453367	0.263836	0.216785	0.22912	0.348371	0.231034	0.583631	0.188389	0.0280712	-0.0605442	-0.156782	-0.140498	-0.216414	-0.0908849	-0.0970609	-0.0750879	-0.0719315	0.0658112	-0.147575	-0.15138	-0.142799	-0.128305	0.443582	-0.153132	-0.180862	-0.182622	-0.185251	-0.0386948	0.394174	0.232981	0.0710454	-0.109444	-0.146988	-0.172653	-0.154328	-0.324928	-0.161361	-0.136751	-0.173176	-0.202306	-0.0942271	-0.189206	0.403131	-0.577273	0.207549	-1.20645	-0.346047	0.8574
ECD_03928	thiamine phosphate synthase	-0.287747	0.459765	0.0878549	3.37997	0.056613	0.203941	0.114301	0.0833231	0.381979	0.183314	0.444608	0.417174	0.611883	0.48779	0.48749	0.500951	0.502926	-0.0972656	0.0656535	0.0391007	0.0486925	0.395312	0.887736	0.0370894	-0.00156947	0.027831	-0.0167449	-0.0473297	-0.0728658	0.174774	-0.142858	0.331453	-0.382743	-0.0879062	-0.0339337	0.0272989	-0.195695	-0.357957	-0.234956	-0.0110667	-0.28851	-0.420814	0.817485	0.0161206	0.574274	-0.58164	0.202455	0.104971
ECD_01652	component of SufBCD complex	-0.183746	0.174636	0.180197	0.210646	0.578524	0.170629	0.191731	0.108517	0.993034	0.0381958	0.210243	0.902909	0.204582	0.242488	0.238927	0.259351	0.264886	-0.0882978	0.589351	0.588967	0.599276	0.91982	0.559539	0.587852	0.591253	0.586887	0.630174	0.494478	0.228189	0.234114	-0.260616	0.483709	0.430957	0.409752	0.476664	0.864363	0.0910175	0.43992	0.454219	0.412469	0.440093	0.419723	0.45308	-2.13659	1.65734	0.855066	0.642388	0.301515
ECD_00595	putative NAD(P)-binding amidase-type enzyme YbeM (C-N hydrolase family)	0.102519	0.162237	0.0740284	0.0092247	0.198301	0.1345	-0.010012	-0.0523033	-0.164189	0.232595	0.130148	-0.265312	-0.327849	-0.157476	-0.160894	-0.174526	-0.135226	0.118562	-0.338943	-0.365601	-0.369365	-0.351837	-0.0832659	-0.367641	-0.387927	-0.356653	-0.225987	-0.0965296	-0.296335	0.130579	-0.128267	-0.414508	-0.453	-0.459444	-0.23444	-0.406291	0.0817281	-0.415671	-0.430374	-0.332519	-0.394566	-0.470268	-0.183716	0.324344	0.710073	0.18744	0.193343	0.961997
ECD_02798	hypothetical protein	0.103623	-1.08776	-1.60107	3.36201	-0.860112	-1.56458	-1.54197	-1.56869	-1.70263	0.160104	-0.604527	-1.09238	-1.73299	-1.60699	-1.64913	-1.58879	-1.61547	0.0215192	-1.60536	-1.60748	-1.60005	-1.58499	-1.69736	-1.60959	-1.39576	-1.64318	-0.822932	0.10623	-0.349585	-0.16106	-0.252227	-1.79539	-1.13649	-0.514435	-1.44973	-0.831585	-0.109097	-1.41207	-1.83333	-0.920008	-1.78064	-1.86436	-1.05908	-0.152917	0.309886	0.907562	-1.1776	0.250799
ECD_03298	glycerophosphodiester phosphodiesterase, cytosolic	-0.0488093	-0.187768	0.153344	-0.198347	-0.10853	-0.00520085	-0.207963	-0.33236	-0.198724	-0.0846996	-0.39347	-0.411216	-0.523758	-0.313544	-0.309095	-0.288095	-0.302912	0.0252234	-0.109195	-0.120346	-0.108663	-0.13213	-0.0240655	-0.160149	-0.209504	-0.181344	-0.0286837	-0.745478	-0.10457	-0.408204	0.131781	-0.303787	-0.400403	-0.420039	-0.488454	-0.399259	-0.0283053	-0.385457	-0.484917	0.0860402	-0.276825	0.0916217	0.0453831	0.15297	0.32356	0.00651501	-0.04471	-0.89318
ECD_01773	putative YeaWX dioxygenase beta subunit, reductase component	-0.451249	0.777224	0.735152	1.64176	1.86154	0.769004	0.755276	0.689285	0.637548	-0.316258	0.69927	0.692542	0.723185	0.744311	0.771708	0.789247	0.768536	-0.545707	0.674011	0.663988	0.67691	0.679169	0.634142	0.656453	0.634615	0.652667	0.653341	0.522644	-0.529243	-1.68729	0.0238274	1.76831	1.71678	1.74579	1.76854	1.67263	0.0397981	1.71099	1.70355	3.02522	1.7349	1.72702	1.66379	-1.46213	3.36087	-0.0547067	1.4478	0.553679
ECD_02131	ferredoxin-type protein	-0.284261	0.314443	0.239597	0.278449	0.180487	0.295481	0.27985	0.25744	0.435081	0.141166	0.113026	0.0825791	0.566038	0.139228	0.136918	0.153968	0.163955	0.192676	0.306746	0.283873	0.305213	0.266473	0.990475	0.28968	0.653139	0.281177	0.325311	1.15217	0.347722	0.0863543	0.0267253	-0.0271861	-0.0579974	-0.0477407	-0.00891793	0.016576	0.04149	-0.0463059	-0.0591731	-0.0725571	-0.0364745	-0.0497172	-0.042736	-0.430894	-0.836223	0.222621	-0.36976	0.218601
ECD_03083	putative N-acetylmannosamine-6-P epimerase	-0.0102838	0.470064	3.35745	0.40595	0.79093	0.416765	0.422874	0.63194	0.240022	0.186493	0.794017	0.753046	1.10928	0.83888	0.829624	0.861524	0.856661	0.00568304	0.276348	0.260773	0.530017	0.282326	0.0925428	0.258985	0.211757	0.23492	0.230058	-0.117381	0.0500207	0.412693	0.0214254	0.288733	0.463913	0.110273	0.498619	0.41467	0.225261	0.264523	0.176974	0.734174	0.325069	0.230045	0.067566	0.158056	0.191275	0.964184	0.648552	0.0822079
ECD_02658	UPF0382 family inner membrane protein	0.11465	3.35499	-0.500493	-0.46392	-0.35499	-0.434225	-0.172165	-0.384824	-0.58122	0.0412324	-0.380176	-0.258226	0.0871652	-0.328593	-0.34843	-0.319515	-0.320586	-0.065789	-0.382075	-0.386411	-0.387466	-0.398427	-0.28739	-0.388673	-0.338899	-0.432857	-0.262773	-0.334256	0.0998464	-0.200672	-0.191886	-0.453435	-0.261211	-0.225161	-0.628053	-0.477884	-0.198791	-0.611776	-0.305549	-0.560132	-0.597481	-0.533862	-0.638016	0.618748	0.183811	0.296764	-0.183188	-0.100498
ECD_01046	OPG biosynthetic ACP-dependent transmembrane UDP-glucose beta-1,2 glycosyltransferase; nutrient-dependent cell size regulator, FtsZ assembly antagonist	-0.294839	1.73911	1.69515	1.69247	1.40383	1.73144	1.70518	1.65966	1.59277	0.256829	1.19168	1.201	1.31946	1.22974	1.21962	1.36671	1.25051	-0.00832549	0.662947	0.648934	0.66406	0.663552	0.549642	0.653306	0.633299	0.635016	0.660695	0.698547	0.219399	-0.10061	-0.295638	0.504607	0.451289	0.490457	0.523296	0.898095	-0.0535782	0.451281	0.479895	0.658737	0.475764	0.825345	0.42536	0.524196	0.53611	0.242595	0.888216	0.776377
ECD_00632	UMP phosphatase	0.0337403	-0.330469	-0.398154	-0.490427	-0.102492	-0.481281	-0.147037	-0.419388	-0.637153	0.2704	-0.459601	-0.478688	-0.523815	-0.314764	-0.402367	-0.391367	-0.380122	0.19569	-0.238883	-0.257095	-0.258059	0.263078	-0.314416	-0.258812	-0.286829	-0.262515	-0.294917	-0.13854	0.176755	0.068358	0.0975866	-0.474232	-0.489766	-0.495827	-0.478329	-0.439071	-0.0748151	-0.477724	-0.318637	-0.542279	-0.441978	-0.484495	0.329553	0.862643	1.48039	0.0916872	-0.268045	0.00681056
ECD_03277	sn-glycerol-3-phosphate dehydrogenase, aerobic, FAD/NAD(P)-binding	-0.0530414	2.08059	2.00722	2.06604	1.15381	2.06544	2.0422	1.9173	1.85588	0.0231736	1.13299	1.13946	0.995533	1.2526	1.2481	1.26123	1.27199	-0.754077	1.21975	1.20943	1.21727	1.18509	1.07959	1.24473	1.23964	1.22433	1.10172	1.05529	-0.888545	0.303017	-0.326938	0.916077	0.916785	0.772457	0.8042	0.985556	-0.332231	1.08923	1.1807	0.704106	1.02398	0.896326	0.979993	-0.0942787	-0.938852	0.251252	1.2527	3.28948
ECD_00582	apo-citrate lyase phosphoribosyl-dephospho-CoA transferase	0.0855415	-0.652885	-0.735939	-0.676006	0.0103853	-0.691772	-0.674145	-0.709738	-0.835032	-0.0701287	-0.461695	0.244778	-0.527274	-0.383413	-0.38762	-0.368892	-0.36804	-1.09305	-1.06181	-1.06788	-1.06986	-1.05196	-0.574026	-1.07848	-1.11953	-1.08724	-1.09284	-0.429846	-0.566702	0.43603	-0.0914649	-0.681315	-0.707883	-0.213115	0.12294	0.478281	-0.0684846	-0.686803	-0.689055	-0.691925	-0.672116	-0.726065	-0.85109	0.196753	0.500199	-1.56065	-0.863313	0.941328
ECD_02613	putative antiterminator regulatory protein	0.0721991	-0.274292	-0.485127	-0.475765	2.15399	0.104596	-0.304403	3.34742	-0.427384	-0.0652291	-0.45205	-0.459003	-0.498349	-0.408717	-0.418963	-0.377973	-0.393403	-0.0560363	-0.350475	-0.338848	-0.345951	-0.348898	-0.289993	-0.340997	-0.403908	-0.38622	-0.367257	0.0859632	-0.0439304	-0.21223	-0.0269798	0.292926	-0.263501	0.0772139	-0.189598	-0.26606	0.147701	-0.249567	-0.270586	-0.305114	-0.211775	-0.256036	-0.309291	0.0696016	-0.751487	-0.332273	-0.589439	-1.14478
ECD_01432	formate dehydrogenase-N, alpha subunit, nitrate-inducible	-0.0681595	0.396122	0.374079	0.394108	0.668057	0.374809	0.406586	0.330567	0.298999	-0.00851992	0.405268	0.408617	0.376542	0.433963	0.434861	0.442627	0.449698	0.392066	0.217186	0.215798	0.225648	0.233695	0.186948	0.214084	0.227364	0.200948	0.24829	0.424225	0.180872	0.00633803	0.102248	0.361023	0.283647	0.311306	0.629784	0.185047	-0.369317	0.448399	0.334317	0.317972	0.340736	0.293454	0.257937	-0.135218	0.696244	-0.439267	0.469527	0.375085
ECD_03778	formate dehydrogenase-O, Fe-S subunit	-0.00450468	-0.117246	0.076332	0.0888105	-0.378453	-0.20875	0.161196	-0.10337	-0.168784	-0.00827184	-0.31895	-0.231973	-0.394039	-0.219971	-0.207615	-0.205429	-0.20535	0.080601	-0.306706	-0.337508	-0.317362	-0.316997	-0.346819	-0.339471	-0.421052	-0.354354	-0.304225	-0.199741	0.16729	0.0678929	0.0446165	-0.260758	-0.310709	0.152133	-0.500625	-0.178718	0.171661	0.0466445	-0.47958	-0.513174	-0.373423	-0.450259	-0.313877	0.165064	0.0870087	-0.476297	-0.575273	0.0230924
ECD_02879	membrane spanning protein in TonB-ExbB-ExbD complex	-0.273757	0.580125	0.464634	0.527828	3.33453	0.522982	0.505985	0.506441	0.34838	-0.338736	0.696713	0.695367	0.644912	0.797754	0.75806	0.766785	0.785056	-0.0606448	0.645233	0.627583	0.642124	0.65274	0.518749	0.630536	0.593524	0.615658	0.575731	0.299696	-0.486052	0.00532643	-0.0809301	0.941393	0.964682	0.177436	0.452123	0.633663	-0.23974	0.312951	0.274113	0.236435	0.354866	0.254475	0.134549	0.519141	-0.348547	-0.0569332	0.582874	-0.283735
ECD_02242	DedA family inner membrane protein	-0.107782	-0.484932	-0.565195	-0.508755	-0.53102	-0.510467	0.312765	-0.569801	-0.651647	-0.402305	-1.20967	-1.19905	-0.662318	-1.18355	-1.16863	-1.13695	-1.15812	-0.074918	-1.12759	-1.13148	-1.10584	-1.1035	-1.17621	-1.14313	-1.14228	-1.15598	-1.11492	-1.28	-0.212165	0.132182	-0.332153	-0.588701	-0.606876	-0.271786	-0.5954	-0.625338	0.290774	-0.576929	-0.607235	-0.615091	-0.591323	-0.608572	-0.712405	1.40005	-0.183476	0.781388	-0.49597	-0.676455
ECD_04015	uncharacterized protein	0.201473	-0.497304	-0.575891	-0.543554	-0.924796	-0.560426	-0.536764	-0.61967	-0.735412	0.170046	-0.40874	-0.465913	-0.542709	-0.306539	-0.310235	-0.319659	-0.282366	-0.413247	-0.681646	-0.688414	-0.692498	-0.718877	-0.0884233	-0.725045	-0.7343	-0.748879	-0.765731	-0.333009	-0.128966	0.0511008	0.248074	-0.442356	-0.889684	-0.667276	-0.927824	-1.20305	-0.483126	-0.877861	-0.948037	-0.989152	-0.778371	-0.880311	-1.09576	-0.333589	0.569033	-0.527732	-0.742498	1.17647
ECD_04160	IS1 protein InsA	-0.11222	-0.912168	-0.991769	-0.950173	-0.0524769	-0.969196	-0.951545	-1.0386	-0.541371	0.345105	-0.728372	-0.736481	-0.837277	-0.647655	-0.614537	-0.632325	-0.592413	0.046041	-1.02759	-1.03055	-1.0319	-1.01693	-1.14931	-1.03907	-1.06211	-1.07243	-1.06941	-1.17847	-0.00622934	0.236598	-0.0362758	-0.888785	-0.91923	-0.499544	-0.993918	-0.71191	-0.184983	-0.908534	0.350738	-1.04664	-0.857508	-0.954663	-1.171	0.525275	0.303244	0.139721	-0.911879	0.0769084
ECD_00962	SOS cell division inhibitor	-0.215028	-1.46291	-1.52599	-1.51188	-1.6326	-1.49066	-1.46995	-1.53357	-1.49832	0.107848	-0.976843	-1.55498	-1.60937	-1.51684	-1.51885	-1.50985	-1.54724	0.200072	-1.53096	-1.55392	-1.52063	-1.52604	-1.5001	-1.53223	-1.57008	-1.49609	-1.54059	-1.70503	-0.0532683	-0.357339	0.137105	-1.56571	-1.61212	-1.03386	-1.42583	-1.16337	-0.0212707	-1.59695	-0.882007	-1.42799	-1.59231	-1.58172	-1.70225	1.81964	1.94792	-1.69517	-0.909091	0.378701
ECD_03102	DUF1656 family putative inner membrane efflux pump associated protein	-0.158582	-0.350446	3.31924	-0.396998	-0.190028	-0.271563	-0.384614	-0.476634	-0.300147	-0.166057	-0.298829	-0.329869	-0.204331	-0.25622	-0.264533	-0.223403	-0.2432	0.021484	-0.487353	-0.502208	-0.492718	-0.475818	-0.228324	-0.500222	-0.541901	-0.519442	-0.572488	-0.616729	-0.339289	0.0437198	-0.0362985	-0.529917	-0.561255	-0.725472	-0.612279	-0.623401	-0.0521586	-0.547873	-0.359688	0.185805	-0.505694	-0.587026	0.221698	0.111259	0.430961	0.44452	0.218145	-0.527378
ECD_01868	L-arabinose ABC transporter ATPase	-0.141343	-0.00825216	-0.0432074	-0.00352504	-0.0127086	-0.0134136	-0.0208124	-0.0687284	0.153493	0.406497	-0.0239854	-0.0210332	-0.0584245	-0.0102263	-0.00783596	0.0238029	0.00873602	0.290702	0.374983	0.363044	0.374433	0.392582	0.380372	0.365861	0.370358	0.358294	0.390109	0.209037	0.32163	-0.455407	0.131862	0.116959	0.0840048	0.113848	0.127484	0.0288977	-0.0191958	0.0795619	0.0881687	0.0547497	0.089752	0.0832619	-0.00418444	0.0268661	1.05712	0.399615	-0.0496288	-0.865832
ECD_02207	NADH:ubiquinone oxidoreductase, membrane subunit H	-0.0991129	2.12515	2.03693	2.08268	2.01747	2.08731	2.0812	2.01899	1.90292	-0.914529	1.51974	1.52208	1.46194	1.57343	1.56252	1.56814	1.60883	-0.448971	1.66285	1.63123	1.66451	1.64778	1.57517	1.62219	1.6761	1.63212	1.67527	1.51998	-0.832055	0.304273	-1.53117	0.702748	0.652794	0.643298	0.702193	0.626612	-1.69525	0.673016	0.875798	0.631958	0.672037	0.685784	0.76914	-0.125254	1.29506	-0.545999	1.96607	0.258798
ECD_02203	NADH:ubiquinone oxidoreductase, membrane subunit L	-0.405017	1.23481	1.14001	1.27547	0.844661	1.1722	2.67738	1.13833	1.0237	-0.479144	0.765615	0.764137	0.711693	0.809946	0.801438	0.820515	0.831418	-0.775346	0.707763	0.696996	0.724197	0.714893	0.639124	0.685484	0.714	0.683165	0.726336	0.761357	-0.532123	0.0956123	-0.776406	0.467023	0.515987	0.411341	0.457184	0.382849	-1.16802	0.447124	0.411331	0.409701	0.441178	0.454874	0.31498	-0.655973	-0.270403	-0.0641405	0.598701	0.21508
ECD_03554	acetolactate synthase 1 small subunit	0.172696	0.589782	0.674348	0.20778	1.02342	0.192342	0.192323	0.159308	0.459001	0.019553	-0.0405886	-0.039149	-0.0918763	0.325804	0.181961	0.193095	0.201968	0.0337502	-0.355462	-0.35959	-0.369133	-0.341413	0.84392	-0.389789	-0.431701	-0.0906212	-0.563461	-0.869656	-0.384923	-0.141767	-0.481433	-0.0463586	-0.586794	-0.595486	-0.262164	-0.421363	-0.083397	-0.583667	-0.699803	-0.805663	-0.469912	-0.442757	-0.111754	-0.0855087	-1.00762	-0.685617	-0.418224	-0.510016
ECD_04064	L-xylulose 5-phosphate 3-epimerase	0.00773013	-0.331817	-0.0683681	-0.141832	-0.0316458	-0.375639	-0.322068	-0.416626	0.236883	-0.172363	-0.156612	-0.211774	-0.262354	-0.0802691	-0.0674275	0.385172	-0.0457967	0.303846	-0.173524	-0.159131	-0.180246	-0.0432791	-0.173067	-0.202754	-0.241996	-0.253608	-0.261843	-0.1534	0.135173	-0.0552449	0.195191	-0.212157	-0.107456	0.0591246	0.71662	-0.525138	0.0176462	-0.220247	-0.111375	-0.348388	-0.123862	-0.213752	0.427798	0.371152	0.0823129	-0.3288	-0.323883	-0.425303
ECD_02770	uncharacterized protein	-0.0487826	-0.516161	-0.609785	-0.577312	0.101762	-0.573354	-0.568008	-0.601603	-0.732605	0.467634	-0.374075	-0.364366	-0.421828	-0.287786	-0.330535	-0.292569	-0.292857	0.0857701	-0.445844	-0.458996	-0.452867	-0.451785	-0.553261	-0.457365	-0.500496	-0.492589	-0.0357981	-0.779764	-0.259342	-0.063017	-0.41365	-0.89152	-0.957185	-1.03975	-0.947947	-1.10133	-0.331519	3.25457	-0.939572	-0.990713	-0.891633	-0.965874	0.212172	0.317129	-0.843449	-0.693249	-0.739616	-0.480057
ECD_00682	succinate dehydrogenase, membrane subunit, binds cytochrome b556	-0.179564	0.57921	0.545837	0.551242	0.0436368	0.559065	0.565973	0.486511	0.381808	-0.273545	0.331991	0.294182	0.256161	0.364199	0.357292	0.372087	0.385838	-0.937058	1.20146	1.18029	1.1765	1.17836	1.04884	1.16491	1.12388	1.15027	1.15612	0.925238	-0.0830769	1.01206	-0.997966	0.44893	1.09714	0.426537	0.472129	0.430806	-1.36424	0.453011	0.436429	0.408513	0.500714	0.44196	0.304711	-3.7898	-2.00498	-1.38088	0.165401	0.138564
ECD_03349	glutathione oxidoreductase	-0.314244	1.01442	1.17836	0.988355	0.153755	1.12136	0.955406	1.14657	0.838992	-0.31968	0.815217	0.916638	0.787927	0.939153	0.930035	0.944045	0.941696	-0.567351	1.06326	1.05216	1.06523	1.04334	0.856916	1.15145	0.987966	1.24833	1.11034	0.595137	0.242152	0.0232011	-0.354658	1.22451	0.836997	0.722249	0.823405	0.391581	-0.382939	1.07203	0.737616	0.998476	0.950793	1.23979	0.86488	-2.23789	-0.897604	-1.06037	0.366364	0.713118
ECD_03197	putative PAS domain-containing DNA-binding transcriptional regulator	0.10065	0.404103	0.334605	0.366385	-0.602802	0.364102	0.350015	0.25585	0.304024	-0.109445	0.178984	0.171629	0.0896451	0.239333	0.232788	0.264176	0.259645	-0.215151	0.51445	0.701606	0.512727	0.509358	0.382404	0.506522	0.442625	0.478011	0.6682	0.115966	0.206835	-0.00136502	0.0569458	0.513184	0.213177	0.962086	0.437882	0.164245	-0.0910632	0.193614	0.159231	0.128138	0.333627	0.894013	0.0514194	-0.0657601	-0.177597	0.395539	0.397257	0.900421
ECD_03576	2-oxo-3-deoxygalactonate 6-phosphate aldolase	-0.420677	-0.52061	-0.21586	-0.0635386	-0.904229	-0.57331	-0.567442	-0.575309	0.394565	0.000293945	-0.663901	-0.645154	-0.710546	-0.441385	-0.439137	-0.425873	-0.434162	0.171332	-0.250546	-0.260916	-0.256008	-0.238235	-0.464291	-0.283826	-0.328993	-0.323099	-0.459582	0.433354	-0.128281	-0.0987896	-0.0783469	-0.702395	0.239696	-0.69358	-0.334356	0.235424	0.0973169	0.463614	-0.618459	-0.921147	-0.628456	-0.701302	-0.895735	-0.345515	-1.80331	0.28431	-0.147119	-1.27032
ECD_02266	beta-ketoacyl-CoA thiolase, anaerobic, subunit	-0.0901842	-0.971539	-1.03401	-0.998952	0.08544	-1.0207	-0.981625	-0.478724	-0.0746982	0.0320846	-0.905382	-0.59428	-0.247439	-0.871105	-0.86832	-0.841501	-0.856708	-0.00843537	-0.561709	-0.862824	-0.844503	-0.842118	-0.783961	-0.725517	-0.887848	-0.903163	-0.854823	-0.881615	0.175751	-0.102033	0.0329497	-0.839748	-0.677292	-0.534144	-0.712343	-0.905297	-0.00756192	-0.8676	-0.41454	-0.898732	-0.876643	-0.873658	-0.996739	-0.0140336	0.874439	-0.00283234	-0.504165	-0.137922
ECD_00563	2,3-dihydro-2,3-dihydroxybenzoate dehydrogenase	-0.0550253	-0.503004	-0.170376	-0.5255	-0.757043	-0.528888	0.143503	-0.558436	-0.25394	0.194097	-0.265499	-0.270219	-0.344714	-0.209464	-0.209199	-0.195542	-0.18353	-0.214947	-0.232961	-0.243731	-0.232096	-0.225527	-0.369857	-0.253345	-0.278311	-0.257797	-0.0779632	-0.376931	-0.185596	-0.112556	-0.0575604	-0.744569	-0.770231	-0.793571	-0.772162	-0.00399193	0.333627	-0.757948	-0.756678	0.0303009	-0.723992	-0.763319	-0.241785	-0.295629	1.12991	0.492273	0.161651	0.0848549
ECD_00917	ComEC family inner membrane protein	-0.196372	0.044189	0.181357	-0.000649582	0.228854	0.0318869	0.0429852	0.309843	-0.0896024	-0.0851398	0.437999	0.459581	0.409385	0.480085	0.473697	0.478075	0.49242	-0.14946	0.140111	0.106558	0.117133	0.133845	0.0412745	0.133348	0.0934879	0.121472	0.115479	-0.0493638	-0.0228848	0.0502329	0.0408139	0.591297	0.468159	0.693317	0.540293	0.487478	0.0265686	0.477759	0.462313	0.483964	0.480353	0.454391	0.872154	-1.08102	-0.956534	-0.505542	0.246541	-0.14645
ECD_02741	UPF0149 family protein	0.107105	0.0927678	0.0743509	0.0410556	-0.283737	0.0699796	0.0865216	0.032024	0.135802	-0.139756	0.0411373	0.0364274	-0.00580694	0.104009	0.0680407	0.111369	1.19946	0.0665351	0.0586063	0.0491118	0.0587321	0.0474149	0.249791	0.0499581	-0.000951076	0.0240134	0.0864639	0.047126	0.173106	0.063401	-0.232674	0.395601	-0.0187745	0.0569074	0.260892	0.366672	-0.0921387	-0.00143368	-0.0342687	-0.074416	0.0421713	0.00159498	0.103659	0.378232	-0.834733	-0.19689	-0.203738	0.0799271
ECD_01435	putative DNA-binding transcriptional regulator	0.989405	0.219166	0.189999	0.207182	0.112411	0.19827	0.230416	0.149548	0.154821	0.80693	-0.153294	-0.152645	-0.179373	-0.134515	-0.134418	-0.119313	-0.115018	0.570795	-0.187151	-0.188758	-0.171797	-0.158497	-0.18169	-0.190344	-0.152863	-0.196709	-0.133055	-0.15956	1.51437	-0.882873	0.384154	-0.586961	-0.65465	-0.597355	-0.597706	-0.686167	0.258474	-0.670253	-0.569057	-0.592405	-0.613002	-0.643872	-0.620642	1.28604	3.27736	-1.31619	-0.260645	-0.574933
ECD_00982	cytochrome bd-II oxidase, subunit II	0.08311	1.31264	1.23647	1.248	0.91745	1.29158	1.26808	1.19558	1.15566	0.857809	1.77158	1.78029	1.72276	1.87022	1.85592	1.8107	1.87134	0.17476	1.22062	1.18582	1.20153	1.20341	1.10988	1.19043	1.22797	1.22197	1.25994	1.0686	0.626714	-0.97257	0.0601808	1.92271	1.86966	1.84948	1.96746	1.94418	-0.625248	1.82638	1.81457	1.81944	1.88597	1.8908	1.74722	0.184207	1.16631	0.449737	1.09539	0.546967
ECD_00649	ornithine decarboxylase isozyme, inducible	0.243302	-0.0926446	-0.154902	-0.10921	0.475015	0.984337	-0.109781	0.104938	0.00148908	0.236752	-0.19271	-0.216411	-0.101374	-0.134771	-0.137665	-0.129794	-0.11218	0.0686997	-0.190412	-0.196412	-0.221492	-0.206571	-0.315863	-0.198676	-0.242885	-0.24015	-0.235217	-0.458559	0.0307961	0.270876	0.00979698	-0.138855	-0.11238	-0.169714	-0.117625	-0.162749	0.126086	-0.0589274	-0.102433	0.0506372	-0.0769717	-0.0341683	-0.228532	-0.341484	-0.584875	0.500067	-0.177398	-0.457205
ECD_03610	phosphate ABC transporter permease	0.382697	0.531499	0.389785	0.516914	0.873716	1.07194	0.494729	0.460913	0.23399	0.0387574	-0.231714	-0.258003	-0.294488	-0.0207964	-0.0195792	-0.029035	-0.0195788	-0.688437	0.353999	0.342829	0.350466	0.367026	0.150988	0.330294	0.274856	0.288872	0.670299	0.941378	0.0444115	-0.327847	-0.143931	0.337796	0.30934	-0.00796585	1.38797	1.10253	0.0548775	0.836097	0.213534	0.102467	0.410427	0.327328	0.14956	0.456917	0.0749796	-0.96585	1.19195	1.09353
ECD_01446	D-ala-D-ala dipeptidase, Zn-dependent	-0.416314	1.47464	1.45752	1.51448	1.19908	1.46401	1.47727	1.39918	1.37643	0.406162	1.59726	1.58224	1.56119	1.63048	1.62984	1.63178	1.65195	-1.19166	3.26273	1.70028	1.71169	1.6792	1.62796	1.70032	1.73663	1.66999	1.76013	1.61919	-0.299878	-1.62243	0.528215	1.87072	1.78524	1.81747	1.83457	1.706	0.310115	1.75894	1.82424	1.78742	1.84045	2.25787	1.74873	0.159671	0.0675617	-0.778076	1.16409	0.524364
ECD_01925	imidazole glycerol phosphate synthase, glutamine amidotransferase subunit	0.221978	0.606731	0.564367	0.608822	0.270824	0.597916	0.589398	0.542921	0.488653	0.800473	0.625001	0.618826	0.564552	0.645431	0.638666	0.658493	0.66353	0.436655	0.694128	0.648532	0.659457	0.681037	0.659518	0.667832	0.687099	0.674554	0.688494	0.545802	-0.343673	0.0324061	-0.103125	1.00778	0.971667	0.985821	1.01228	0.987488	-0.285235	0.98282	0.948164	1.98299	0.993201	0.955377	0.873342	1.28125	-1.31773	0.911761	0.45566	-0.527568
ECD_01976	protein kinase-related putative non-specific DNA-binding protein	0.171072	0.155952	0.101723	0.126864	-0.203299	0.144243	0.123732	0.0890807	0.00721726	0.16954	0.0485797	0.0512203	0.391636	0.0932291	0.0868255	0.112605	0.0825204	-0.705746	0.0985622	0.0622282	0.100603	0.276535	0.0606696	0.0715447	0.0720384	0.0820661	0.0864292	-0.0869581	-0.609839	0.391544	-0.452757	0.115093	0.280662	0.0765267	0.276746	0.0797918	-0.390674	0.123901	0.353455	0.0853208	0.145664	0.229158	-0.0177606	-0.111238	-0.507631	-0.0933743	0.60005	-0.0347831
ECD_02113	16S rRNA pseudouridine(516) synthase	0.104052	0.40016	0.308451	0.361548	-0.0733651	0.358657	0.350541	0.307309	0.201649	0.343878	0.177601	0.169603	0.133333	0.194393	0.188604	0.210287	0.208435	-0.0664544	-0.344658	-0.362705	-0.343101	-0.373617	0.605163	-0.354616	-0.390492	-0.367854	-0.368111	-0.537211	-0.298493	-0.252108	0.551591	0.394594	0.366999	0.345718	0.390966	0.312275	-0.105592	0.381233	0.360884	0.330673	0.380866	0.3715	0.258975	0.392569	0.640384	0.364021	-0.0108599	0.763204
ECD_04039	global sRNA chaperone; HF-I, host factor for RNA phage Q beta replication	-0.144242	0.648978	0.55906	0.603327	0.439046	0.586259	0.635669	0.550071	0.61992	-0.157785	-0.0674522	0.111042	-0.199757	0.0207662	0.0197908	0.0247751	0.0286206	-0.0161999	0.217016	0.210757	0.214119	0.18416	0.0209136	0.173877	0.159268	0.147075	0.330001	-0.00123359	-0.0983595	0.141063	0.105551	0.212962	0.214326	-0.0096008	0.32611	0.0971066	-0.144235	0.224922	0.137322	0.330934	0.316287	0.233009	0.517532	-0.133755	1.18378	0.322913	0.247406	0.515698
ECD_01698	putative transporter	-0.536903	-0.793661	-0.819996	-0.784286	3.24997	1.62296	-0.805492	-0.356323	-0.385888	-0.124139	-0.210801	-0.207275	-0.220795	-0.180877	-0.180028	-0.157023	-0.176562	-0.020061	-0.108681	-0.138495	-0.105281	-0.0361266	-0.14045	0.0682887	-0.140629	-0.126174	0.120769	-0.0225368	0.0690631	0.115236	-0.187893	-0.438991	-0.462906	-0.531862	-0.474181	-0.549184	0.163543	-0.463307	-0.45224	-0.52688	-0.452268	-0.515258	-0.545554	1.06022	1.06301	0.253707	-0.320535	-0.0474341
ECD_01241	putative RNA binding protein	-1.45328	0.163645	0.107051	0.109378	0.965375	0.138925	0.183966	0.0982051	0.0606921	-0.48444	-0.170442	-0.162137	-0.199627	-0.157769	-0.164222	-0.14071	-0.153127	-0.213051	-0.383234	-0.395589	-0.371142	-0.360006	-0.468146	-0.389698	-0.386549	-0.419857	-0.390258	-0.449168	-0.0049582	0.514841	-0.0551251	-0.53507	-0.580665	-0.5379	-0.519274	-0.538382	-0.781585	-0.569261	-0.487198	-0.478658	-0.544582	-0.527731	1.74272	-0.631042	-0.954896	-0.383491	0.00146707	0.354544
ECD_01038	curlin nucleator protein, minor subunit in curli complex	-0.0688285	-0.808268	-0.883222	-0.8812	-0.981694	-0.826664	-0.831711	-0.893714	-0.912003	-0.667566	-0.448987	-0.423865	-0.478652	-0.424063	-0.430388	-0.407381	3.24112	-1.03544	-1.19373	-1.20556	-1.17438	-1.17455	-1.23895	-1.19291	-1.22064	-1.21099	-1.17579	-1.22464	0.737644	-0.160589	-0.864914	-0.673411	-0.715657	-0.634347	-0.630128	-0.602338	0.0186883	-0.716535	-0.662985	-0.626288	-0.670307	-0.665572	-0.68675	1.38833	-2.57685	-0.765154	-1.01863	-1.63997
ECD_00602	septal ring protein, suppressor of prc, minor lipoprotein	0.0900026	-0.663711	-0.729537	-0.454437	-1.20662	-0.702381	-0.268765	-0.732004	-0.834391	-0.172818	-1.03922	-1.04242	-1.12328	-0.961281	-0.963808	-0.954298	-0.945853	0.350371	-0.473368	-0.490899	-0.495024	-0.474934	-0.58425	-0.492395	-0.28131	-0.502518	-0.509654	-0.28635	0.305851	0.265594	0.0365988	-0.921231	-0.94693	-0.0687349	-0.927941	-1.00066	0.0577836	-0.925477	-0.923739	-0.430599	-0.891616	-0.963961	-1.10343	0.392102	0.902678	0.0583602	-0.610092	0.515578
ECD_00777	glutamine transporter subunit	0.350035	0.206619	0.154265	0.207134	-0.215269	0.182667	0.206162	0.114863	0.0446208	0.0179044	0.089813	0.0550363	0.442074	0.110372	0.103211	0.118146	0.120808	-0.367823	-0.3475	-0.352588	-0.119609	-0.338378	-0.219189	-0.354509	-0.38725	-0.366423	-0.196788	-0.549075	-0.164939	0.0891273	-0.331084	-0.368519	-0.278552	-0.0378398	-0.33083	-0.444908	-0.142087	-0.36538	-0.412579	-0.40362	-0.365795	-0.140376	-0.141257	0.156397	1.44626	-0.204932	-0.136358	-0.233844
ECD_00635	glucosamine-6-phosphate deaminase	-0.16702	0.000464861	0.656436	-0.0273175	-0.566049	-0.0265723	-0.0192983	-0.0953022	0.339964	-0.445746	-0.177312	-0.187361	-0.237397	-0.105058	-0.107336	3.23511	-0.0832882	-0.0169616	-0.226572	-0.25618	-0.25364	-0.239873	0.34383	-0.24153	0.414566	-0.254179	-0.281652	-0.515072	0.00668899	0.0711126	-0.249485	-0.26484	-0.285014	-0.334381	-0.270571	0.274108	-0.0814802	-0.273476	-0.270214	0.148276	-0.246213	-0.287285	-0.444325	0.756925	1.564	0.52016	-0.437121	1.69441
ECD_00093	D-alanine:D-alanine ligase	-0.0875323	-0.959121	-0.430161	-0.980039	-0.627734	-0.758829	-0.707718	-1.02072	-0.849997	-0.037473	-1.24863	-0.926742	-1.29537	-1.17111	-1.16924	-1.14898	-1.16964	0.24046	-1.32671	-1.31613	-1.31852	-1.30593	-1.41886	-1.32957	-1.38077	-1.24097	-1.34963	-0.730322	-0.0113765	-0.013951	0.122155	-1.3464	-1.37542	-1.0972	-1.00037	-0.648914	-0.187428	-1.34341	-1.0923	-0.898299	-1.30477	-1.43534	-1.58952	0.593033	-1.45351	-0.54871	-0.950049	-0.162408
ECD_04223	HpaA	0.0254217	0.440523	0.3622	3.22571	-0.0989492	0.385539	0.395769	0.310324	0.270289	0.0933581	0.443009	0.709913	0.333275	0.524436	0.557266	0.538408	0.580591	0.0465587	0.344554	0.337594	0.336683	0.349806	0.44836	0.581377	0.317609	0.302513	0.30652	0.325972	0.231965	0.123984	0.395732	0.446614	0.249563	0.156618	0.171109	0.761252	-0.00866534	0.261569	0.340497	0.747839	0.309859	0.864251	0.0974589	0.00264705	0.761478	0.135589	0.12694	-0.0443301
ECD_00437	putative amino acid transporter	0.0774856	0.23852	0.281026	0.168238	-0.121413	0.322759	0.222373	0.122715	0.0514776	0.0360654	0.223964	0.191668	0.179533	0.250568	0.258728	0.26998	0.282241	0.0121238	0.124015	0.118672	0.12823	0.148804	0.352315	0.271681	0.0671622	0.0807347	0.0961992	-0.16193	-0.0750315	-0.290353	0.0387578	0.0467876	0.0056741	0.523384	0.0117906	0.0841418	0.19764	0.0162767	0.15796	0.0659579	0.0415596	0.297037	0.0126605	0.0955218	-0.301128	0.412166	0.0842064	0.85017
ECD_03937	putative cation/proton antiporter	0.100624	-0.123561	-0.199422	-0.0360651	0.0538412	-0.147426	0.242971	-0.0595865	-0.108387	0.114952	-0.13085	-0.0296882	0.142017	-0.11512	-0.119706	-0.107386	0.0803388	0.0231053	-0.250201	-0.276354	-0.261151	-0.159316	-0.301617	-0.274554	-0.140191	-0.318007	0.0111906	0.489594	0.01765	-0.0199565	8.59744e-05	-0.279533	-0.247245	0.236832	-0.380365	0.214992	0.0363496	-0.105488	-0.300545	0.256705	-0.151207	-0.212593	-0.18075	0.127163	0.520455	0.274349	0.194172	-0.0321989
ECD_02244	putative semialdehyde dehydrogenase	0.00409018	-0.0306137	-0.109743	-0.0584373	-0.556648	-0.0740318	-0.041345	0.350462	0.24522	-0.335017	0.0784885	0.0849569	0.0376572	0.123336	0.125131	0.147407	0.147045	-0.516699	-0.6377	-0.648768	-0.617231	-0.622115	-0.695016	-0.657376	-0.387605	-0.67208	-0.630549	-0.797834	-0.4312	0.263136	-0.0298645	-0.330442	-0.355525	-0.376249	-0.342021	-0.369544	-0.497519	-0.330613	0.00287621	-0.367229	-0.342766	-0.357806	-0.466341	0.142239	-2.46593	-1.57532	0.295734	-0.240072
ECD_00838	putative phage tail protein	-0.263168	0.295323	0.224067	0.262847	-0.102493	0.281256	1.44051	1.3724	0.165038	0.0464014	0.758266	0.761051	0.688952	0.780952	0.772357	0.783155	0.808838	0.00891033	0.556768	0.546365	0.551752	0.558714	0.474139	0.546824	0.507901	0.540688	0.548857	0.379278	-1.43405	-0.341344	0.367069	0.68991	0.623832	0.604797	0.716829	2.04223	-0.0742697	0.624191	0.616443	0.648404	0.646623	0.658905	0.507766	-0.0473557	-1.9497	-1.0542	0.144255	0.689518
ECD_02786	DUF1202 family putative secreted protein	-0.0835664	-0.164041	0.112928	3.07009	-0.2916	-0.228841	-0.213279	-0.237681	-0.377728	-0.182651	-0.0252275	-0.0217593	0.212194	0.0661659	0.0230905	0.0674619	0.0682397	0.103756	-0.167038	-0.172583	-0.164758	-0.152149	-0.262853	-0.174273	-0.234844	-0.206026	-0.187302	-0.15154	-0.00810171	-0.233001	-0.0783611	0.0211389	-0.0318195	0.0791715	0.39478	-0.194196	0.118458	-0.012059	0.0638766	-0.073457	0.031218	-0.0446243	-0.0747096	-0.311092	-0.402743	-0.141454	0.123206	0.486498
ECD_00432	Cys-tRNA(Pro)/Cys-tRNA(Cys) deacylase	-0.115369	0.537736	0.473424	0.500013	0.0332913	1.32892	0.501505	0.465354	0.422816	1.20368	1.1425	1.10931	1.08871	1.17283	1.17546	1.17673	1.2259	-0.220297	0.510726	0.503832	0.520518	0.543438	0.4492	0.507471	0.478463	0.475989	0.505787	0.313818	0.659403	-0.978782	0.0364983	1.21928	1.1647	1.19452	1.21337	1.17747	-0.295163	1.1731	1.18589	1.16549	1.21172	1.22484	2.78597	-1.77596	-2.03989	1.02214	0.409281	-0.679561
ECD_00812	putative drug efflux MFS transporter, inner membrane protein	0.0907785	-0.0915042	-0.16444	-0.123662	-0.386041	-0.123443	-0.0975159	0.217618	-0.248853	0.117394	-0.0270878	-0.0235372	-0.0655062	0.0335745	0.0234012	0.0114249	0.0379501	-0.0543392	-0.0395159	-0.0595723	-0.0587259	-0.0439296	-0.136368	-0.0465186	-0.0847592	-0.079565	-0.0601395	-0.256271	-0.120594	0.0118254	0.0908649	0.147165	-0.051367	0.294473	0.162654	0.216402	0.0599924	-0.000431423	-0.0336155	-0.017992	0.246802	-0.0207673	-0.151703	0.302545	0.892161	0.12227	0.0420172	0.365082
ECD_00279	putative metallo-dependent hydrolase domain deaminase	-0.066994	-0.0563383	0.333997	0.0251318	-0.0177078	-0.017298	0.0210869	0.180898	-0.0536062	0.166999	0.110991	-0.0635166	-0.0956448	0.106183	0.0278244	0.048388	0.0455265	-0.0261049	-0.238684	-0.236071	-0.259325	-0.242738	-0.11936	-0.259283	-0.102518	-0.28512	-0.201013	-0.0906858	0.084766	0.224613	-0.149824	-0.00837654	-0.0317901	0.0595439	-0.0195988	0.652186	0.0323748	0.759956	0.0202386	-0.0348192	-0.0644069	-0.101836	0.057193	0.0809084	-0.525847	-0.416458	-0.0590432	0.163626
ECD_00235	DNA-binding transcriptional regulator	-0.227562	-0.251773	-0.383828	-0.371191	0.0562142	0.143111	-0.355891	-0.409631	-0.571947	0.411513	0.008095	0.0219248	-0.0575968	0.0984339	0.0916102	0.0872329	0.119821	0.133961	-0.104493	-0.104133	-0.103375	-0.0906613	-0.193183	-0.105465	-0.132062	-0.138105	-0.136262	-0.399285	-0.183505	0.0592828	-0.0391278	-0.210308	-0.238411	-0.384031	-0.364117	-0.429413	-0.178402	-0.0931649	-0.0417154	-0.418663	-0.29891	-0.402476	-0.627364	0.387633	0.0905932	0.165826	0.601883	0.123103
ECD_01048	multicopy suppressor of secY and secA	0.441182	0.974135	0.929767	0.928436	1.51646	0.965838	0.942495	3.17097	0.8359	-0.871985	0.638834	0.650358	0.603121	0.67936	0.670608	0.671882	0.688942	0.447906	0.854354	0.83013	0.846149	0.840989	0.728438	0.835711	0.845277	0.833735	0.861772	0.747569	-0.12028	-0.0626779	-0.601518	0.00337206	-0.0457597	-0.0120966	0.911293	0.00325978	-1.07295	-0.0538597	-0.00909939	0.744617	-0.0295608	-0.0193329	-0.0729935	0.515695	-2.00512	-2.70035	-0.141947	-1.01774
ECD_03751	activator of Der GTPase	-0.290451	-0.189822	0.0731054	-0.31371	-0.161092	-0.372453	-0.406335	0.598118	-0.567112	0.0597433	-0.0267426	-0.176381	-0.255438	-0.0736137	-0.0756693	-0.0679014	-0.058726	-0.272645	-0.0660218	-0.10847	-0.0748862	-0.0828069	0.181266	-0.0886123	-0.167973	-0.178296	-0.225681	-0.508962	-0.0689647	0.107672	-0.336196	-0.396886	-0.431013	0.211874	-0.0731073	-0.441513	0.102094	-0.0518395	-0.537793	-0.124958	-0.349705	-0.0329205	-0.212085	0.00557527	-0.931859	-0.649538	-0.104873	-0.3208
ECD_03018	putative inner membrane permease	-0.00431372	-0.189769	-0.277947	-0.240726	-0.199652	-0.250291	0.323761	-0.308541	0.160566	0.153964	0.293723	0.445589	0.207033	0.396082	0.374426	0.391446	0.485174	0.105443	-0.108831	-0.126542	-0.120884	0.218912	0.215426	-0.127572	-0.183286	-0.179946	-0.179268	-0.24089	-0.014177	-0.235175	-0.0743172	-0.0845861	-0.126595	0.832288	0.367391	-0.411019	0.229013	-0.12867	0.0648984	-0.119865	0.215842	-0.132295	0.482634	0.050445	0.409605	-0.151865	0.355817	0.195048
ECD_03845	argininosuccinate lyase	-0.0643704	0.177426	3.16482	0.360797	-0.334722	0.333934	0.326882	0.313672	-0.0634166	-0.168279	0.0433078	0.0377877	-0.0453397	0.159431	0.159426	0.129146	0.136075	-0.0767573	0.235804	0.212397	0.224041	0.228698	0.18849	0.212442	0.133968	0.131635	0.422282	-0.192402	-0.0541643	-0.0348097	-0.0438702	0.0431217	0.0168591	0.726458	0.333891	0.0525998	0.0222001	0.18359	0.295835	0.749836	0.109884	0.0133274	0.395603	0.257647	-1.26189	0.197479	0.244847	-0.727845
ECD_02376	hydrogenase 4, membrane subunit	-0.0448407	-0.434951	-0.522251	-0.4652	-0.0309501	-0.472342	-0.484325	-0.537924	-0.610849	0.32248	-0.0202236	-0.222385	-0.300736	-0.179708	-0.168748	-0.158779	-0.148618	-0.0601877	-0.708803	-0.709602	-0.714693	-0.682257	-0.809638	-0.732285	-0.465088	-0.742984	-0.709474	0.170871	0.145866	-0.0256852	-0.158957	-0.231581	-0.0880961	-0.273062	0.188007	-0.349568	0.293513	-0.160592	-0.0159826	-0.207713	-0.233757	-0.318384	-0.144935	-0.274114	-1.32586	0.248884	-0.387452	-0.366776
ECD_03242	shikimate kinase I	-1.85539	2.22441	2.73741	2.15792	1.07723	2.17354	2.16378	2.04256	1.90704	-0.532998	1.78607	1.79186	1.65445	1.90211	1.89548	1.9064	1.92177	-0.139847	1.92448	1.89604	1.90345	1.90065	1.72471	1.89522	1.86412	1.89072	1.82502	1.94527	-0.279023	-0.90269	0.451625	2.94006	2.87471	2.71751	2.79874	2.5343	-0.531287	2.90769	2.81401	2.71227	2.99233	2.90798	2.63156	-0.244239	-1.57514	1.29328	2.29688	1.02033
ECD_02358	GDP-mannose pyrophosphatase	0.245252	0.17314	0.0797789	0.144744	-0.183948	0.124478	0.115296	0.0618884	0.270373	0.186864	0.00101895	0.039903	0.211645	1.74436	0.0634541	0.0809133	0.0888516	0.17702	0.140623	0.132264	0.137246	0.154181	0.347511	0.116833	0.109683	0.0902034	0.147417	0.193555	-0.0197896	-0.0758811	-0.237053	0.235791	0.192858	0.163567	0.175387	0.269563	-0.12729	0.494559	0.206174	0.429193	0.223577	0.203766	0.510958	-0.258071	-1.91069	-0.309577	0.0760967	0.331348
ECD_00854	glutaredoxin 1, redox coenzyme for ribonucleotide reductase (RNR1a)	0.0311919	0.0922865	0.0282355	0.0549639	1.66192	0.0658556	0.0662085	0.0172551	-0.0304919	-0.465391	-0.239013	-0.223162	-0.276841	-0.212548	-0.218224	-0.197562	-0.200225	-0.121388	0.243058	0.23851	0.241133	0.252637	0.769342	0.236496	0.211573	0.22282	0.380947	0.0466223	0.388087	0.771052	0.221945	-0.0855898	-0.149162	-0.176538	-0.0735277	0.201894	0.672726	-0.169094	-0.158365	-0.139302	-0.12982	-0.119441	-0.247579	0.747405	-2.5442	-0.337616	-0.535957	-0.798128
ECD_01247	putative EmrKY-TolC system oxoacyl-(acyl carrier protein) reductase	0.514966	0.0805497	0.726821	0.0362871	-0.250021	0.0499679	0.105144	0.015955	-0.0618722	-0.228669	-0.0520446	-0.0432405	-0.0799698	-0.0308885	-0.0369467	-0.0157961	-0.0306734	-0.357606	-0.563828	-0.583983	-0.557565	-0.556847	-0.681389	-0.569087	-0.599171	-0.614811	-0.594843	-0.713062	-0.142731	0.349877	0.163123	0.163621	0.124553	0.121719	0.16865	0.672226	0.0240631	0.137707	0.193756	0.186746	0.160527	0.157299	0.089133	0.451362	-1.0947	0.760324	0.506199	-0.541153
ECD_02905	DUF1249 protein YqiB	0.00602205	0.0216766	0.0567466	0.133199	-0.663163	-0.0503586	0.0662554	0.414903	0.100592	-0.134544	-0.155556	0.192516	-0.0692921	-0.0958971	-0.10546	-0.0882371	-0.0854051	0.021299	-0.162656	-0.175847	-0.185084	0.0837394	-0.0133739	-0.19662	-0.175182	-0.207248	-0.0876025	-0.520322	0.0387333	0.122605	-0.129004	-0.0811978	0.0458294	-0.259277	0.186811	0.909838	-0.00966256	-0.118665	-0.15464	0.165048	0.0654039	0.0149629	-0.232988	0.867271	-0.540973	0.497904	0.00681906	0.134602
ECD_02138	microcin J25 efflux ABC transporter permease/ATPase	0.235252	3.14957	0.405441	0.307309	0.401417	0.312928	0.320307	0.439451	2.61277	0.0663384	0.136391	0.126906	0.0612569	0.161493	0.159237	0.185176	0.667228	-0.0477535	-0.0353303	-0.0432956	-0.0314306	-0.0343775	-0.0976631	-0.0441034	-0.0490795	-0.0586173	-0.0175146	0.326494	0.111793	0.0663592	-0.329699	-0.118995	-0.255574	-0.113938	-0.227902	-0.287191	-0.223266	-0.240769	-0.254397	-0.257535	-0.234642	-0.247052	-0.209447	-0.335165	-0.806258	0.119908	-0.16799	-0.310315
ECD_03974	putative DNA-binding transcriptional regulator of phosphonate uptake and biodegradation	-0.528104	-1.00103	-1.08503	-1.013	-0.34	-1.07789	-1.04088	-1.11084	-1.21549	0.214135	-0.787351	-0.807067	-0.907686	-0.730459	-0.734263	-0.732092	-0.127325	-0.0368799	-1.18038	-1.18361	-1.19326	-1.18234	-1.35086	0.0658886	-1.23171	-0.644771	-0.107859	-1.71393	-0.210777	-0.388963	0.0105447	-0.983844	-1.00017	-1.21269	0.0616088	-1.30195	0.272077	-0.965869	-1.04451	0.340728	-0.905428	-0.462742	0.137077	0.146061	0.411047	-0.575495	-0.921952	-0.18978
ECD_00935	nicotinate phosphoribosyltransferase	-0.277995	-0.311834	-0.372333	-0.359611	0.440864	-0.327761	-0.321458	0.0371636	-0.433151	0.521367	0.0763118	0.4111	0.0493672	0.131049	0.115621	0.133787	0.125676	0.498051	-0.266443	-0.271374	-0.260293	-0.243257	-0.336362	-0.269171	-0.287949	-0.286094	-0.271601	-0.435444	0.370452	0.119879	-0.245917	-0.613271	-0.0823379	-0.700127	-0.352411	-0.650443	-0.481647	-0.644149	-0.653124	-0.642377	-0.653466	-0.673219	-0.765969	0.586223	0.539881	-0.0558897	-0.046443	-0.25048
ECD_04246	16S rRNA m(2)G1207 methyltransferase, SAM-dependent	-0.265331	-0.207239	-0.148036	-0.245689	-0.471211	-0.263812	0.0745642	-0.0323248	-0.478831	0.121888	3.14817	-0.261201	-0.361577	-0.173071	-0.139746	-0.156796	-0.118689	0.103116	-0.154556	-0.159753	-0.160846	-0.146902	-0.203836	-0.167994	-0.14585	-0.197822	-0.194229	0.169624	-0.36614	0.382616	-0.030774	-0.215324	-0.243612	0.165587	-0.0508847	0.494978	0.20852	-0.231413	0.0269928	-0.36726	-0.183488	0.0122922	-0.494424	0.44418	-2.69831	-0.140851	-0.329975	-0.201474
ECD_02032	hydoxyethylthiazole kinase	0.129732	0.318316	0.24542	0.289585	1.24369	0.290994	0.279782	0.240228	0.167508	0.683405	0.444031	0.441842	0.392496	0.484836	0.481772	0.507991	0.479578	0.31579	0.504455	0.461882	0.503452	0.505512	1.20298	0.481177	0.4913	0.490372	0.490424	1.03425	0.663981	-0.273764	-0.630355	0.0607334	0.0197871	0.0166864	0.0661633	0.0253534	0.370145	0.0584004	0.0331715	0.0286894	0.0705281	0.0198136	-0.0700811	0.688837	-2.05774	-0.130464	-0.144439	0.71598
ECD_03055	acid stress protein; putative BolA family transcriptional regulator	-0.0834966	0.720412	0.626916	0.662802	0.563213	0.665831	0.66763	0.577896	0.827143	0.338204	0.739688	0.737379	0.639488	0.82602	0.821728	0.827223	0.840955	0.215357	0.084624	0.0666487	0.0643322	0.0915732	-0.0823868	0.0649175	0.3727	0.0424706	0.0296475	0.555669	-0.116254	0.660085	0.251183	0.375809	0.293162	0.180323	0.264021	0.00176482	-0.144487	0.282934	0.217837	1.17957	1.0823	0.268319	0.107172	0.819118	-0.894475	0.675054	0.069462	-0.0897978
ECD_02151	acetyl-CoA acetyltransferase	-0.2845	-0.559217	-0.250474	3.14221	2.94539	-0.593726	-0.575728	-0.606148	-0.319134	0.00840733	-0.187099	0.134826	-0.23808	-0.156912	-0.158849	-0.130409	-0.155631	-0.440119	-0.751427	-0.764433	-0.750909	-0.761925	-0.827035	-0.767006	-0.788372	-0.786997	-0.754001	-0.0835394	-0.360912	-0.559702	-0.323092	-0.489259	-0.516142	-0.498866	-0.497233	-0.550964	0.0755747	-0.4719	-0.521732	-0.505922	-0.47675	-0.502692	-0.580737	-0.113405	-1.59551	0.184393	-0.505206	-1.55499
ECD_00638	chitoporin	-0.0888739	-0.563746	2.59324	-0.589191	3.06255	-0.61594	3.14219	-0.288639	-0.25483	0.11586	-0.7342	-0.559582	-0.791509	-0.239353	-0.674287	-0.65795	-0.653555	0.174059	-0.223916	-0.246445	-0.273375	-0.238107	-0.349886	-0.248105	-0.279587	-0.256129	-0.268882	-0.503575	0.168405	0.208383	-0.143307	-0.779863	-0.448989	-0.233445	0.946088	-0.515895	-0.145669	-0.665847	-0.740153	-0.805024	-0.715679	-0.760383	-0.265472	-0.243261	0.524513	-0.166506	-0.770612	-0.94876
ECD_03214	peptidyl-prolyl cis-trans isomerase A (rotamase A)	-0.139384	-0.549178	-0.610431	-0.934946	0.193077	-0.939664	-0.937976	3.1411	-1.15025	0.376486	-0.662975	-0.666798	-0.0531377	-0.590569	-0.594841	-0.544011	-0.578345	-0.0837389	-0.86819	-0.870787	-0.864479	-0.878179	-0.500347	-0.368004	-0.944082	-0.911558	-0.973837	-0.979577	-0.00939948	-0.16549	0.522942	-0.576388	-0.639338	-0.667837	-0.423811	-0.294818	0.091053	-0.625196	-0.677951	-0.0851003	-0.524893	-0.30318	0.749852	-0.224103	-2.1744	-0.104728	-0.616967	-0.634133
ECD_03511	glutamate transporter	0.165391	0.411727	3.13851	0.547655	0.434072	1.26858	0.597412	0.69251	0.980209	0.247847	0.389301	0.142087	0.0638856	0.103261	0.181078	0.105951	0.0893741	-0.0789209	0.233223	0.220715	0.202026	0.229028	0.714481	0.189458	0.361124	0.112763	0.209911	0.404498	-0.134552	0.0471036	0.0557676	-0.172515	-0.0746636	0.244779	0.341714	-0.0886508	-0.198855	-0.0533362	-0.202114	0.130164	-0.0730758	0.164841	-0.161484	-0.0309099	-1.0554	0.441387	-0.0646516	-0.177082
ECD_00332	diguanylate cyclase, cellulose regualtor	0.328792	0.0548958	-0.011415	0.0407768	-0.435958	0.0305864	3.13058	-0.00892838	0.079184	0.44718	-0.110255	-0.151521	-0.164767	-0.0566863	-0.0351169	-0.0213919	-0.0380077	0.181776	-0.18058	-0.18206	-0.182312	-0.160749	-0.267768	-0.188169	0.431	-0.222697	-0.00735452	-0.270741	-0.00986738	0.0052869	0.242271	-0.403084	-0.472478	-0.42516	-0.264438	-0.61914	0.0374398	-0.437683	-0.479054	-0.306533	-0.386117	-0.480493	-0.0471254	0.0362581	0.122837	0.275266	-0.28595	0.157274
ECD_02033	hypothetical protein	0.0348336	-0.325225	-0.399659	-0.352177	-0.669916	-0.355007	-0.357343	-0.398813	-0.471667	-0.303794	0.0687649	0.0669215	0.0209759	0.105431	0.103857	0.135421	0.0946584	0.779593	-0.746371	-0.77906	-0.738524	-0.731905	-0.795762	-0.760959	-0.778461	-0.767392	-0.769722	-0.946963	1.0141	0.186259	0.42609	-0.66955	-0.704642	-0.709206	-0.148722	-0.706269	0.137884	-0.661768	-0.682151	-0.686044	-0.658243	-0.708901	-0.793728	2.04674	3.12929	-2.01554	-0.385306	-1.39676
ECD_03020	stress-resistance protein	0.224424	0.952568	0.225784	0.263903	1.1711	0.251746	0.261849	0.197851	0.822309	0.188416	-0.231571	-0.204097	-0.311673	-0.129336	-0.150808	-0.13045	-0.133432	-0.720405	-0.285602	-0.305027	-0.297653	-0.278766	-0.0525863	-0.299765	-0.362778	-0.357643	-0.357278	-0.35256	-0.378695	-0.2506	0.106517	-0.445029	-0.483348	0.31519	-0.496793	-0.766837	0.0426216	-0.485566	-0.495704	0.0856547	-0.418033	-0.487947	0.285711	-0.669051	0.734113	0.31568	-0.188303	-0.592092
ECD_00218	type 2 glutamine amidotransferase family protein	-0.678955	0.516825	0.473957	0.901551	0.859659	0.499206	0.493587	0.8078	0.279762	0.0861954	0.311567	0.602698	0.503335	0.414078	0.407108	0.408657	0.428652	0.133084	0.480727	0.481048	0.488807	0.492293	0.389539	0.479881	0.454967	0.452109	0.466061	0.197943	0.229391	-0.287387	-0.0927753	0.660495	0.619596	0.598162	1.08073	1.12316	0.350933	0.796631	0.591307	0.560515	0.669355	0.579619	0.371907	-0.270846	-0.118305	0.126738	0.180972	2.20694
ECD_01589	transcriptional repressor of Mal regulon	0.55495	0.0548182	0.0324217	0.0397355	-0.0924167	0.0245251	0.0662085	-0.00967679	0.00148908	-0.412417	-0.729241	-0.725553	-0.745056	-0.717197	-0.708228	-0.68594	-0.702594	-0.0784242	-0.847149	-0.835169	-0.818635	-0.815766	-0.853526	-0.83712	-0.824651	-0.858416	-0.802102	-0.870803	-0.100877	-0.652115	-0.135157	0.0679541	-0.0387682	0.0742275	0.0586878	0.0033377	0.290955	0.00132831	0.0105947	0.0367763	0.0471734	0.00403801	0.0422344	0.564419	-0.431546	-0.677997	0.308296	1.08782
ECD_03004	tagatose 6-phosphate aldolase 1, kbaY subunit	-0.17319	-0.0201536	-0.109351	-0.0617402	0.0878212	-0.0975522	0.427692	-0.129163	-0.267934	-0.0302662	0.361124	0.366329	0.478212	0.441454	0.434939	0.454427	0.454571	0.231074	0.564209	0.540168	0.549919	0.560843	0.853188	0.551012	0.501619	0.503791	0.666159	0.304018	0.233395	0.066692	0.416947	0.291546	0.252151	1.01716	0.549968	-0.0320355	-0.048207	0.263994	0.21332	0.754618	0.578996	0.216464	0.207279	-0.0360962	-0.624726	0.518916	-0.00894897	-0.576624
ECD_04139	uncharacterized protein	0.505847	0.765503	1.04595	0.725081	0.556157	0.711519	0.71803	0.811445	0.669628	0.0777469	1.47446	0.285393	0.183926	0.374827	0.407681	0.388986	0.430876	0.0845125	0.361459	0.352525	0.351845	0.364091	0.233055	0.344733	0.338546	0.320867	0.325411	-0.13639	0.127886	0.0530856	-0.312473	0.29816	0.268476	0.442741	0.192563	0.236749	0.0718742	0.279615	0.171403	0.142885	0.329634	0.305828	0.230863	0.669052	0.0756138	-0.349121	0.168833	0.78082
ECD_00601	D-alanyl-D-alanine carboxypeptidase (penicillin-binding protein 5)	0.396966	-0.212931	-0.297221	-0.249049	0.318433	-0.269313	-0.261945	-0.293223	-0.403412	-0.0325745	-0.0816465	-0.0849076	0.0920905	-0.0019938	0.00084692	0.0114802	0.0193175	0.511304	-0.0238577	-0.0403597	-0.0445246	-0.0239617	-0.133231	-0.0419735	-0.0719778	-0.0537419	0.133789	-0.00455678	-0.0521365	0.244305	0.166837	-0.0208195	-0.210655	0.00108194	0.159232	-0.00265017	0.140536	-0.106202	-0.196148	-0.244217	-0.15914	-0.230366	-0.25787	0.806951	1.38311	0.213657	-0.114783	0.114252
ECD_00151	iron(3+)-hydroxamate import ABC transporter periplasmic binding protein	-0.198785	0.651282	0.614295	0.626521	0.33197	0.630558	0.629595	0.579394	0.743646	-0.0145193	0.413647	0.425505	0.964049	0.504043	0.501447	0.505395	0.522173	0.118567	0.738264	0.7412	0.739686	0.748763	0.63761	0.728695	0.698719	0.689128	0.790755	0.440564	-0.273129	-0.0418375	0.0275131	0.732298	0.695838	0.910037	0.694716	1.06513	0.111813	0.722353	0.897368	0.677891	0.772004	1.04074	0.513425	-0.142061	0.640239	0.110505	0.523738	-0.800638
ECD_00352	acyl carrier protein (ACP) phosphodiesterase; ACP hydrolyase	0.041998	-0.217537	-0.303178	-0.242228	-0.0786874	-0.230278	-0.218869	-0.292047	-0.365341	-0.0249963	-0.659728	-0.701567	-0.703932	-0.630078	-0.625744	-0.596291	-0.616168	0.0987663	-0.570279	-0.553503	-0.564171	-0.541989	-0.641058	-0.575735	-0.577042	-0.595109	-0.574002	-0.555073	0.197824	-0.424659	-0.125788	-0.70281	-0.746952	-0.822947	-0.757167	-0.0655098	0.437272	3.11726	-0.17932	-0.82117	-0.680267	-0.765574	0.515617	0.736133	-0.0350952	-0.216797	-0.458369	-0.141153
ECD_02273	putative inner membrane protein	0.0573786	0.487821	0.427433	0.456933	0.113751	0.57424	0.465403	0.405795	0.475015	0.136579	0.708418	0.710832	0.811514	3.11591	0.753012	0.764925	0.784325	0.0864958	0.1781	0.17204	0.189741	0.198538	0.0934485	0.155344	0.158271	0.142861	0.202563	0.387565	-0.413925	0.245924	-0.00787487	0.644903	0.595289	0.58671	0.623308	0.594325	-0.0011358	0.613747	0.600141	0.577306	0.62061	0.614451	0.486129	-0.164887	-0.291389	0.351785	0.606194	1.10579
ECD_04177	N-acetylneuraminic acid mutarotase	-0.0570562	0.356617	2.24147e-05	0.0397355	-0.164863	0.0231109	0.0357675	-0.0502052	0.715504	0.20931	0.0151223	0.00688202	-0.0952073	0.0973936	0.129952	0.110142	0.154691	0.0744576	0.219517	0.212506	0.211589	0.224694	0.0931506	0.204483	0.785749	0.592871	0.181536	0.941365	-0.0114254	-0.128116	-0.157679	0.540098	0.729725	-0.109513	0.73276	0.179911	-0.113738	-0.139171	-0.246539	-0.275082	-0.0911477	-0.188075	-0.402153	-0.170717	0.577249	0.0104344	-0.0530886	-0.71741
ECD_03015	UPF0102 family protein	0.307623	1.13084	1.14603	1.07713	0.514528	1.05692	1.05314	1.00806	0.975105	0.170381	0.891704	0.927444	0.789028	0.99926	0.97917	0.980855	1.37253	-0.303594	0.532968	0.517717	0.52035	0.549909	0.401277	0.523225	0.459226	0.463914	0.459355	0.490163	-0.401656	0.375868	-0.141307	0.463238	0.437488	0.555984	0.728769	0.958331	-0.182541	0.429992	0.415745	0.480838	0.47901	0.418968	0.338952	0.765062	0.506902	-0.126949	0.75492	0.647004
ECD_01842	tRNA (cmo5U34)-carboxymethyltransferase, carboxy-SAM-dependent	-0.168452	0.162401	0.116718	0.152765	0.915984	0.156618	0.141823	0.1029	0.0711683	0.177596	0.225817	0.229544	0.190224	0.243617	0.249599	0.270329	0.263778	0.185375	0.125	0.0944516	0.114055	0.127456	0.107155	0.115965	0.101484	0.10709	0.12347	0.851906	-0.821367	0.208306	0.336189	0.0242624	0.00412544	0.0362169	0.0388177	0.616342	-0.275575	0.0014434	0.0122199	-0.0143783	0.00805663	-0.00366429	-0.0630047	-1.23592	3.11024	1.71068	-0.0279092	-0.246453
ECD_00065	L-ribulokinase	0.0283908	0.201588	0.163453	0.178136	-0.0559433	0.179025	0.184649	0.133038	0.577353	-0.209768	0.720821	0.463247	0.395823	0.538255	0.536771	0.544748	0.552094	-0.195027	0.230703	0.2365	0.234668	0.245063	0.357769	0.223649	0.185702	0.179556	0.350374	0.310317	-0.221559	0.156686	0.0821269	0.330412	0.296155	0.258653	0.463602	0.633146	0.121395	0.687332	0.260246	0.236897	0.370687	0.240313	0.349783	0.0576363	0.628409	1.74037	3.03435	0.637724
ECD_00487	Excisionase	-0.653946	0.581353	0.535694	0.55194	0.650863	0.545013	0.562747	0.511957	0.423134	-0.583768	1.67759	1.65536	1.60739	1.70907	1.70457	1.70773	1.74162	0.53886	1.56747	1.54626	1.56726	1.54689	1.44898	1.53511	1.52866	1.5529	1.57844	1.75551	-0.311457	0.068855	0.887808	2.13685	2.58366	2.09865	2.13818	2.0584	0.663015	2.1505	2.10605	2.09407	2.17565	2.141	1.9621	-2.16501	-0.779795	2.13022	1.99523	0.602294
ECD_00389	ATPase and specificity subunit of ClpX-ClpP ATP-dependent serine protease	-0.16248	0.270152	0.18147	0.232974	-0.420835	0.248158	0.214465	0.19652	0.117008	-0.23575	0.0805414	0.0512203	0.0326164	0.126113	0.133635	0.145339	0.144947	-0.19803	0.182448	0.176485	0.184705	0.202153	0.108316	0.174528	0.168445	0.150406	0.149952	-0.12836	0.232266	-0.0582783	-0.328756	0.101285	0.0625841	0.0195971	0.414169	0.132972	-0.157565	0.0840573	0.0520175	0.401201	0.132786	0.0610516	0.458484	-0.0788651	-0.682825	-0.274776	-0.0616859	0.815545
ECD_01405	methionine N-acyltransferase; L-amino acid N-acyltransferase	-1.83723	0.71219	0.693345	0.730945	0.441196	0.698809	0.722053	0.648295	0.618325	1.5227	2.18981	2.19062	3.09346	2.24002	2.22446	2.2052	2.29379	-0.0440566	1.10149	1.09221	1.10296	1.10739	1.06742	1.09145	1.12676	1.09081	1.14016	1.03356	0.00383356	-0.717392	0.365413	1.52579	1.4364	1.47917	1.53177	1.34382	-0.504363	1.43762	1.46886	1.45428	1.50239	1.45544	1.42557	0.205639	-0.038183	1.29151	1.21524	2.11433
ECD_00577	putative Zn-dependent NAD(P)-binding oxidoreductase	0.225496	0.00718893	-0.0694172	-0.0118794	-0.326129	-0.0217759	-0.0151976	-0.0486891	0.56909	-0.402027	-0.29658	-0.299137	-0.357686	-0.216256	-0.221166	-0.205031	-0.199472	0.22854	-0.0527076	-0.0650014	-0.0553117	-0.0478352	0.0318477	-0.0751132	-0.101423	-0.0718855	-0.0789782	-0.259846	-0.04698	-0.130612	-0.000324234	-0.000742304	-0.0299493	0.131403	0.0386313	-0.0845995	0.301943	-0.0122346	0.415531	0.0637462	0.0157148	-0.0362323	-0.165554	0.154987	-0.240607	0.592326	0.278755	-0.174014
ECD_02588	putative class II aldolase	0.0834786	3.09212	0.684377	0.716988	2.64136	0.747403	1.61781	0.792285	0.589808	-0.267835	0.270194	0.561006	0.226286	0.31489	0.30805	0.546202	0.336292	-0.245202	0.36283	0.359199	0.364666	0.391441	0.408833	0.36108	0.347105	0.334741	0.360515	0.344871	0.0345428	0.185123	-0.0185219	0.630045	0.282483	0.250929	0.298931	0.650014	0.0907162	0.302046	0.412106	0.375451	0.329834	0.284679	0.649074	0.359491	0.568629	1.03793	2.16232	0.430238
ECD_02621	hypothetical protein	0.118796	-0.515296	-0.34686	-0.317245	0.38755	-0.4812	-0.512595	-0.576403	-0.637277	0.247753	-0.458008	-0.459095	-0.21282	-0.414899	-0.425069	-0.383797	-0.399875	-0.47951	-0.613415	-0.600086	-0.60737	-0.609535	-0.328507	-0.60244	-0.670116	-0.650358	-0.352537	0.266419	0.289649	0.158196	-0.39376	-0.884375	-0.907477	-0.956216	-0.903567	-0.76394	-0.285113	-0.893401	-0.911969	-0.946275	-0.859547	-0.904283	-1.06941	-0.246346	0.738455	-0.446975	-0.433549	-0.974975
ECD_02246	putative flagella assembly protein	-0.0330854	-0.0919056	-0.168243	-0.120087	-0.38255	-0.135949	-0.103653	-0.18057	3.08185	0.200734	0.7896	0.570707	0.519567	0.614304	0.614439	0.630604	0.644205	0.0753508	0.558187	0.551046	0.565058	0.573877	0.661016	0.541311	0.560734	0.539265	0.575001	0.69912	0.657847	-0.279226	0.111246	0.285998	0.420797	0.493603	0.288011	0.548774	0.265701	0.291496	0.254914	0.587444	0.282447	0.26868	0.294405	-0.385955	1.15807	-0.124131	0.311027	0.178331
ECD_02967	membrane-anchored ribosome-binding protein	-0.0759982	-0.256731	0.318766	-0.294621	-0.658283	-0.332133	0.331059	-0.344744	-0.500495	-0.132132	-0.104328	-0.112569	0.303283	-0.0302977	-0.0394677	-0.0208373	-0.0154024	0.205534	-0.0488386	-0.0634024	-0.0544423	-0.0405633	-0.193501	-0.0541081	-0.111261	-0.0858401	0.260635	-0.417903	0.0377158	-0.0157562	-0.259398	-0.475429	-0.478785	-0.626579	-0.494093	-0.791648	-0.00537797	-0.474905	-0.538964	-0.263353	-0.470514	-0.543835	-0.164813	0.613302	-1.45082	0.0647823	-0.292628	-0.370218
ECD_04141	putative MFS transporter, membrane protein	-0.0517309	-0.46249	-0.543064	-0.499631	0.669093	-0.521081	-0.497966	0.612104	-0.730151	-0.0617226	-0.555874	-0.5636	-0.660649	-0.479992	-0.445229	-0.456984	-0.430975	0.254206	0.061427	0.0578642	0.0566239	0.071327	-0.0607526	0.0494267	0.561919	0.0170225	1.34088	0.569885	0.242037	-0.312805	0.36311	0.0843238	-0.58244	0.32288	-0.0275977	-0.20351	-0.266032	-0.568386	-0.673591	1.08141	-0.524195	-0.621105	-0.832942	-1.06761	0.205268	0.907771	0.190351	-0.794737
ECD_03340	acid resistance protein, inner membrane	0.167336	-0.280613	0.0922926	0.162152	1.42942	-0.283149	2.25508	-0.427431	-0.617325	0.0174121	0.38895	-0.0872636	0.268691	0.0527207	0.044826	0.063287	0.0507298	-0.00454431	-0.0658032	-0.07732	-0.0611989	0.125804	0.0141185	-0.0822916	0.188391	0.084428	0.167582	-0.160872	-0.571133	0.0826459	0.0678028	0.0475407	-0.113743	-0.0292784	0.109023	0.395667	-0.00477036	-0.110931	0.269771	0.0759781	-0.0149618	-0.107019	0.339552	-0.413419	-0.310158	0.403275	-0.123021	0.0355367
ECD_03940	DUF485 family inner membrane protein	0.0357858	3.07618	-0.389473	2.11104	0.237466	-0.408697	-0.366335	-0.411519	-0.51906	0.253066	0.0948204	-0.26203	0.00608414	-0.160782	-0.164522	-0.163265	-0.170786	0.101926	-0.337277	-0.359897	-0.349456	-0.333598	-0.516778	-0.361094	-0.405596	-0.411954	-0.0483844	-0.434558	0.247322	0.180903	-0.0204154	-0.445181	-0.486485	-0.168661	-0.414116	0.519274	0.0659053	-0.461532	-0.560792	-0.092972	-0.400583	-0.510001	0.0886994	-0.0185794	-0.179632	-0.0384019	-0.22265	-0.653093
ECD_03016	DnaA initiator-associating factor for replication initiation	-0.375708	0.876309	0.775128	0.819969	0.929072	0.807431	0.858337	0.753979	0.768224	-0.0304285	1.12787	1.09961	0.967184	1.16443	1.1523	1.15752	1.17654	-0.00173768	1.04739	1.0283	1.03148	1.05378	1.10527	1.02817	1.36159	0.975523	0.976351	0.869875	0.255516	0.461121	-0.382585	1.00898	0.939109	0.827312	0.935044	1.20999	-0.0868038	0.93036	0.913344	0.946323	0.989382	0.92285	1.22828	0.144328	-0.0120447	0.572627	0.785517	0.279038
ECD_02284	formyl-CoA transferase, NAD(P)-binding	0.287786	0.714428	0.654325	0.678702	0.191044	0.665964	0.688571	0.633549	0.53573	-1.5145	0.946133	0.969056	0.878813	0.987814	0.983444	0.99947	1.01475	-0.962732	1.28307	1.26964	1.28028	1.2806	1.17033	1.25174	1.28366	1.25151	1.30657	1.09848	-0.905134	0.369721	0.272498	1.10386	0.580837	0.562553	0.606452	0.557597	-0.451403	0.597734	0.578019	0.550473	0.609801	0.598385	0.462239	0.933122	-0.774539	1.23143	1.69927	3.07329
ECD_03880	sensory histidine kinase in two-component regulatory system with ZraR	0.0866363	0.189817	0.187752	0.299694	-0.0521429	0.511409	0.191961	0.285537	0.272301	-0.256605	0.143257	0.143244	0.222994	0.208089	0.221062	0.20929	0.211291	-0.0683678	0.165894	0.14681	0.218884	0.129319	0.188308	0.152433	0.0967234	0.0597651	0.0281784	-0.129931	-0.104146	0.181457	0.0782607	0.367576	0.335671	0.232053	0.351993	-0.0124191	0.184232	0.315471	0.239375	0.245097	0.461123	0.382978	0.279608	0.0722198	-0.286995	0.0743932	0.495401	0.187063
ECD_02105	murein DD-endopeptidase, space-maker hydrolase, mutational suppressor of prc thermosensitivity, outer membrane lipoprotein, weak murein LD-carboxypeptidase	-0.162759	-1.42525	-0.77925	-1.60549	-0.560798	-1.59979	-1.58327	-1.63099	-1.29067	0.297979	0.887754	-1.38518	-1.32812	-1.50478	-1.50727	-1.47352	-1.50289	0.203818	-1.48443	-1.4969	-1.4779	-1.3014	-1.43886	-1.49537	-1.54339	-1.51154	-1.00134	-1.31891	0.170691	0.169206	-0.186456	-1.89546	-1.92725	-1.84242	-1.65464	-1.87531	-0.335397	-1.78351	-1.78204	-1.79108	-1.91243	-1.8053	-2.03791	1.46794	1.46863	0.118224	0.434601	0.395857
ECD_03978	metalloprotein superfamily protein	0.0451869	-1.99145	-2.07986	-2.01141	-1.23944	-1.22715	-2.01969	2.81218	-2.20393	-0.0345975	-0.502012	-0.851916	-1.86696	-1.70194	-1.70483	-1.69231	-1.71475	-0.271352	-1.8734	-1.87443	-1.04265	-1.87735	-1.19974	-1.89589	-1.93076	-1.68191	-0.536459	-0.80319	0.474448	-0.102725	-0.0459722	-1.0404	-2.2575	-1.4855	0.15693	-0.409656	-0.110548	-2.22377	-1.15199	-0.813397	-2.16924	-1.36767	-1.20718	0.371646	-0.0777355	-0.270818	-1.71904	0.366102
ECD_00433	TraB family protein	0.196342	-0.321587	-0.524794	-0.484196	-0.755331	-0.495832	-0.488849	-0.527592	-0.60226	0.237607	-0.296835	3.06137	-0.35706	-0.27057	-0.263861	-0.251241	-0.243343	-0.254126	-0.576986	-0.576153	-0.566495	-0.547964	-0.155653	-0.571429	-0.631736	-0.614743	-0.602742	-0.472276	-0.0525871	-0.00920508	-0.203575	-0.387644	-0.574809	-0.607874	-0.572116	-0.512571	0.0107272	-0.557259	-0.560675	-0.593573	-0.536583	-0.554047	-0.385213	0.103904	0.598722	-0.267682	-0.520296	-0.648091
ECD_00561	2,3-dihydroxybenzoate-AMP ligase component of enterobactin synthase multienzyme complex	0.177602	0.696514	0.73608	0.673092	0.187443	0.803372	2.52709	0.637751	0.600333	-0.182984	0.235183	0.204893	0.154969	0.291273	0.291477	1.33136	0.317292	-0.148952	0.28223	0.270793	0.28335	0.290657	0.17571	0.264313	0.236611	0.262425	0.27061	0.0197021	-0.264613	-0.116761	-0.0907524	0.194826	0.0694037	0.15346	0.200424	0.104517	-0.115116	0.0803837	0.0795587	0.268415	0.117516	0.17323	0.52653	0.187179	0.434464	-0.15693	0.294049	-0.390504
ECD_02781	UPF0001 family protein, PLP-binding	-0.121874	0.771494	0.675895	0.723303	0.198683	0.709298	0.705929	0.693053	0.721045	0.0859446	1.02706	1.03023	0.969998	1.12279	1.07568	1.10895	1.13323	-0.183007	0.990827	0.980476	0.990002	1.00024	0.911173	0.980336	0.962567	0.958559	0.976229	0.853868	-0.279508	0.029373	-0.0442627	1.15269	1.09993	1.02143	1.32285	1.05688	0.0926526	1.11082	1.32202	1.04672	1.16748	1.08858	0.940539	-0.40093	0.687097	-0.61918	0.661814	0.281478
ECD_03904	maltose transporter subunit	-0.225482	0.505212	0.632081	0.483073	0.309247	0.660766	0.658817	0.564305	0.397494	0.141726	0.361275	0.33804	0.244389	0.394613	0.69862	0.400535	0.405071	-0.111327	0.191547	0.161174	0.165507	0.316417	0.161236	0.160047	0.106017	0.0931692	0.084329	0.233309	0.0626035	-0.242562	0.304796	0.431452	0.209165	0.305956	0.312607	0.194339	-0.0441135	0.539238	0.131246	1.12124	0.315434	0.185382	0.266191	-0.0012106	-1.46296	0.392792	0.159071	0.785156
ECD_01287	putative ABC sugar transporter periplasmic binding protein	0.419537	0.806938	0.749294	0.751413	0.699786	0.751631	0.826437	0.713571	0.66987	-0.143008	0.491511	0.496275	0.459252	0.512121	3.0495	0.522632	0.527696	-0.525807	0.327756	0.320835	0.342058	0.346098	0.234222	0.33049	0.322212	0.310639	0.331997	0.195324	0.18059	-0.174563	-0.215596	0.324335	0.283822	0.282818	0.330998	0.227663	0.0347948	0.293365	0.32319	0.343638	0.320888	0.31769	0.21883	-0.103517	0.204398	-0.162678	0.720546	0.454809
ECD_00371	tRNA s(4)U8 sulfurtransferase	-0.146945	0.314491	0.0897649	0.152355	-0.114473	0.148872	0.1392	0.102337	0.0315235	-0.163874	0.0978682	0.0524078	0.0502628	0.130154	0.133549	0.15732	0.14749	-0.0594989	0.123586	0.121063	0.128348	0.147597	0.0435409	0.116755	0.113921	0.0982725	0.11393	-0.135112	-0.0666658	0.187648	-0.0927715	0.479282	0.215995	0.14678	0.198923	0.193963	0.168592	0.212558	0.182451	0.189613	0.277218	0.233889	0.393548	0.38326	0.160251	-0.0533809	0.295841	0.461956
ECD_00019	transcriptional activator of nhaA	0.0147306	0.0710407	0.0324217	0.0480561	1.04724	0.0477023	0.249577	0.00389527	-0.164765	-0.0890796	-0.215356	-0.20299	-0.267887	-0.131239	-0.131661	-0.119762	-0.121232	-0.0222126	-0.0931116	-0.0869181	-0.0888409	-0.0782756	-0.190315	-0.0998198	-0.138868	-0.144556	-0.111921	0.456516	0.0412752	-0.0410817	-0.140825	-0.374828	-0.095686	0.373612	-0.281196	-0.101984	-0.630745	-0.375737	-0.437464	-0.185036	-0.333779	-0.464289	-0.620223	-0.345165	-0.43734	-0.40226	0.255379	0.436453
ECD_03755	glutamine synthetase	0.156445	1.96885	1.59097	1.68696	0.924131	1.62893	1.56724	1.5932	1.6913	0.19916	1.88682	1.48033	1.37567	1.58829	1.57953	1.58252	1.61014	0.3572	1.62162	1.57774	1.61108	1.61189	1.5293	1.58636	1.54216	1.52574	1.48037	1.44367	0.283316	0.111035	0.355104	1.46154	1.51966	1.54035	1.74817	1.4905	0.164474	1.55598	1.30163	1.38083	1.49409	1.43944	1.48258	-1.12172	-0.239786	0.419154	1.52427	2.54509
ECD_02885	2,5-diketo-D-gluconate reductase A	-0.0658475	-0.00196091	-0.108165	0.0335323	3.03858	-0.0544965	-0.0662232	-0.070963	0.0931133	0.0146361	-0.212992	-0.21382	-0.273526	-0.127111	-0.14679	-0.157472	-0.129859	0.096315	0.0315131	0.026544	0.416352	0.0413317	0.0743155	0.0244056	-0.0181915	0.00167039	-0.0456621	-0.047882	-0.0236184	-0.00159596	-0.351738	-0.195228	-0.256749	-0.373526	-0.265866	-0.0707517	-0.122805	-0.235355	-0.263606	-0.30666	-0.210112	-0.301057	-0.321044	0.144644	-0.548668	0.102495	0.183625	0.36611
ECD_01245	23S rRNA pseudouridine(2605) synthase	0.0177733	0.169745	0.112552	0.127681	0.843607	0.144065	0.192503	0.106024	0.037359	0.471628	-0.209574	-0.200914	-0.235211	-0.194196	-0.197419	-0.172223	-0.202428	0.181808	0.238768	0.224973	0.242635	0.250031	0.116756	0.231006	0.2164	0.195672	0.211671	0.0846483	0.284446	0.421328	-0.178332	-0.785081	-0.829685	-0.836968	-0.421226	-0.862557	-0.922119	-0.815378	-0.755667	-0.759743	-0.793601	-0.800939	-0.867382	1.91363	-1.70923	-0.438041	-0.505188	0.883585
ECD_03465	serine acetyltransferase	-0.4104	0.946288	0.742413	0.900576	1.17664	0.91065	0.930575	0.827879	0.651408	-2.09887	0.670792	0.729965	0.618921	0.871691	0.864091	0.873198	0.880993	-0.691095	1.05777	1.04342	1.05017	1.06337	0.828424	1.02663	0.93652	0.960435	0.851336	2.13364	0.476748	-1.55225	-0.393044	0.988274	0.9745	0.712365	0.842623	0.515936	-0.773549	0.98751	0.878709	0.799192	1.11017	1.00753	0.85979	-0.726271	-2.08254	3.03266	1.90207	0.000468477
ECD_02201	NADH:ubiquinone oxidoreductase, membrane subunit N	0.0234343	1.73872	1.64451	1.69372	1.3886	1.67512	1.69745	1.63319	1.52314	-0.643093	0.35459	0.357735	0.305541	0.398576	0.391105	0.409213	0.421327	-0.568654	0.54944	0.525712	0.558056	0.543158	0.470355	0.515711	0.630979	0.513147	0.554246	0.517624	-0.0804296	-0.0398883	-1.33412	0.634714	0.512563	0.504035	0.545446	0.949751	-0.859397	0.537842	0.501524	0.645123	0.532899	0.546631	0.406243	-0.396072	-0.331436	-0.278331	0.308251	-0.340051
ECD_02209	NADH:ubiquinone oxidoreductase, chain F	-0.522829	1.25113	1.80505	1.21481	0.837102	1.20817	1.22819	1.15352	1.29602	-0.481521	0.295548	0.298879	0.245944	0.325099	0.318373	0.338307	0.340766	-0.708605	1.03041	1.01618	1.04476	1.02492	1.11766	0.991954	1.03501	0.99265	1.03493	1.04477	0.190382	-0.259213	-0.678801	0.26117	0.73365	0.379679	0.257057	0.35807	-0.896308	0.239792	0.218182	0.211842	0.232943	0.24584	0.117839	-0.0600229	-0.918176	-0.437753	0.0443765	-0.128261
ECD_01163	SpoVR family stationary phase protein	0.0757919	0.745933	0.676865	0.633061	0.911774	0.699555	0.735818	0.672639	0.601923	-0.536498	0.616104	0.636824	0.599389	0.675229	0.667277	0.66485	0.666888	-0.375971	0.489308	0.461223	0.480537	0.481752	0.410785	0.481469	0.47058	0.463951	0.477369	0.413296	0.19438	0.404719	-0.0618712	0.927344	0.873727	0.928646	1.16838	1.25266	0.279041	0.865304	0.890711	0.909196	0.909265	0.904543	0.865134	0.0472707	-0.117818	-0.3041	0.50394	-0.024017
ECD_03492	formamidopyrimidine/5-formyluracil/ 5-hydroxymethyluracil DNA glycosylase	0.101719	-0.479866	-0.385977	-0.509051	-1.06875	-0.533847	-0.313473	-0.573796	-0.695425	0.0522112	-0.602453	-0.575593	-0.655468	-0.351923	-0.34187	-0.355087	-0.374826	-0.0983045	-0.489271	-0.500055	-0.501895	-0.0365099	-0.57419	-0.513364	-0.563574	-0.585221	-0.433563	-0.467429	-0.249579	0.0644679	-0.0825825	-0.367689	-0.138305	-0.489562	-0.11445	-0.0746867	-0.185529	-0.551829	-0.700891	-0.464508	-0.454722	-0.289601	0.691204	-0.240757	-1.49966	0.134359	-0.536161	0.149393
ECD_02396	uncharacterized protein	0.0528062	-0.62978	-0.716278	-0.666578	0.0829339	0.0398714	-0.661411	-0.736117	-0.800296	0.114429	-0.823824	-0.813136	-0.845653	-0.793357	-0.785751	-0.765893	0.318658	0.0265128	-0.682804	-0.686702	-0.686811	-0.65879	-0.100236	-0.701876	-0.727706	-0.721554	-0.689521	-0.913096	0.0941326	0.107473	-0.631564	-0.959417	-0.991293	-1.0218	-0.98496	-1.08358	-0.00335306	-0.975976	-0.959113	-1.02375	-0.963306	-1.05388	0.19335	0.161227	-2.91916	0.421175	-0.381215	-1.06075
ECD_02943	putative tRNA binding protein; putative tRNA corner chaperone	0.33864	1.22241	1.11943	1.16744	0.77862	1.15885	1.10412	1.12205	0.964942	0.0224067	1.36277	1.24332	1.15065	1.30583	1.28186	1.29507	1.31679	-0.342214	1.07114	1.04838	1.04234	1.03227	0.878504	1.04579	1.02563	1.03151	1.00733	0.717999	0.102259	0.0121984	0.329655	1.15191	1.05456	0.936255	1.03202	0.873125	0.0366866	1.07934	1.00513	1.32775	1.08834	1.02177	0.902565	0.185263	1.06883	0.0400139	0.657503	0.0117395
ECD_02399	GMP synthetase (glutamine aminotransferase)	-0.531151	3.01034	2.93269	2.95727	2.37561	2.99593	2.91624	2.86	2.79582	-1.0102	2.00345	2.01227	1.96208	2.05661	2.05623	2.04696	2.10235	-1.66941	2.06105	2.04203	2.0509	2.06304	1.94688	2.03026	2.05123	2.03971	2.07067	1.84055	-0.976471	0.00808872	-2.73517	1.59228	1.54027	1.52821	1.57665	1.46726	-2.11411	1.54515	1.55088	1.4863	1.57881	1.48871	1.40897	-2.6862	0.517802	-0.0141288	2.42655	1.79537
ECD_04193	fructuronate-inducible hexuronate regulon transcriptional repressor; autorepressor	0.357294	2.95441	1.96894	1.99898	1.0566	1.99477	1.98107	1.90078	1.7562	-0.0244042	1.63356	1.6249	1.51859	1.72074	1.75153	1.72523	1.78434	0.842265	1.85029	1.83569	1.83562	1.84522	1.71535	1.82859	2.442	1.81361	1.8195	1.86399	-0.58753	0.0900389	0.526519	2.0592	2.02202	1.85404	1.96171	1.74939	0.502855	2.02764	1.91334	1.88417	2.08874	1.99218	1.77147	-0.168498	-2.23062	0.233089	1.50509	-0.425603
ECD_02046	DUF4132 domain-containing protein	0.237256	0.595979	0.526155	0.561652	0.505222	0.581792	0.55983	0.528833	0.442073	0.00876655	0.329809	0.424768	0.275802	0.348234	0.343058	0.368522	0.355099	-0.47933	0.499979	0.459381	0.502133	0.484203	0.429672	0.488453	0.579825	0.57074	0.477738	0.452884	0.308789	0.492855	0.00495674	0.19405	0.174045	0.173818	0.197231	0.425095	-0.151878	0.221922	0.340784	0.159378	0.258571	0.168917	0.325294	-0.35953	0.150013	0.197694	0.370827	0.281906
ECD_00806	D-alanyl-D-alanine carboxypeptidase; penicillin-binding protein 6a	0.295856	-0.0940338	0.0713021	-0.128548	0.53446	-0.117828	-0.10027	-0.177083	0.454967	-0.0523405	-0.317463	-0.325086	-0.384874	-0.257344	-0.268301	-0.26292	-0.26239	0.0107728	0.0146603	0.00279715	0.00935874	0.0275014	-0.0700723	0.00861983	-0.0308375	-0.0101806	-0.00815071	-0.00299883	-0.109073	0.00537792	-0.19573	-0.295326	-0.345399	-0.0529988	-0.270763	-0.151033	0.0945122	-0.33223	-0.342527	-0.342885	-0.323567	-0.336536	0.0980128	0.318638	1.41346	0.378292	-0.0602302	-0.26321
ECD_02212	NADH:ubiquinone oxidoreductase, chain B	-0.328894	0.829418	0.753358	0.892969	0.588468	0.886845	1.02243	0.738237	0.630464	-0.555047	0.168123	0.171502	0.113583	0.190207	0.199909	0.222092	0.205887	-0.467697	0.0411419	0.0327768	0.0606325	0.0434603	0.0906273	0.00783364	0.246026	-0.000780851	0.0399452	0.167859	-0.167318	0.460464	-0.453577	0.0527293	-0.0335667	-0.0386184	0.00299709	-0.0791576	-0.594447	-0.00934414	-0.027901	0.0718263	-0.0191516	0.200514	0.220239	0.337165	-1.9574	-0.0658525	-0.550577	-0.10287
ECD_00873	putative NAD(P)H-dependent oxidoreductase	-0.176192	0.737462	0.677773	0.7066	0.726614	0.728661	1.05465	0.659334	1.08331	-0.276419	0.966272	0.974212	0.918793	0.993711	0.98502	0.996371	1.01539	-0.916712	0.563501	0.517593	0.529344	0.54017	0.70074	0.517952	0.552939	0.554218	0.552217	0.374718	-0.609259	-0.079345	-0.124301	1.0357	0.97435	0.950284	1.39135	1.09755	0.0527516	0.941902	1.13903	1.27824	0.98891	0.990212	0.86464	-1.32594	1.83276	-0.182918	1.11486	2.98734
ECD_04240	DUF3815 family inner membrane protein	-0.252495	0.536167	0.457979	0.496478	0.0248588	0.481396	0.490827	0.932478	0.261209	-0.358522	0.636252	0.628014	0.5259	0.718343	0.75093	0.731201	1.00896	-0.345063	0.698525	0.691696	0.690815	0.704009	0.957993	0.683655	0.671329	0.656409	0.9211	0.919435	-0.528176	-0.142799	-0.0712304	0.828635	0.798144	0.621907	0.723892	0.744722	0.113788	0.80868	0.69979	0.671197	0.859902	1.09097	1.64968	-0.308413	-2.74379	0.267201	0.971803	0.162284
ECD_03643	UPF0438 family protein	0.491701	0.873137	0.729326	0.849958	0.13734	1.23229	0.805667	0.927554	1.1104	-0.130459	-0.206462	-0.137503	-0.270789	-0.0179642	0.0055017	-0.0187235	-0.00816366	-0.0252836	0.446541	0.4281	0.436988	0.452437	0.62116	0.416024	0.354872	0.670461	0.239486	-0.0596053	-0.153921	0.424444	-0.0512564	0.376791	-0.109546	-0.132601	-0.0113219	0.656068	-0.159077	0.311158	0.428585	0.365861	0.00119336	-0.0773241	0.0948665	-0.23886	0.195271	-1.38329	0.179863	2.98506
ECD_01315	p-aminobenzoyl-glutamate hydrolase, A subunit	0.0231208	0.992098	0.934167	0.96405	0.668864	0.959936	0.982168	0.9121	0.867187	0.0700193	1.18434	1.19155	1.1586	1.2303	1.22389	1.22105	1.24572	-0.16973	1.01118	0.999272	1.01056	1.02291	0.975233	0.998973	1.02585	0.997581	1.03788	1.25185	-0.776552	-0.309886	0.0392919	1.23505	1.16047	1.17217	1.21015	1.10812	0.402132	1.14462	1.18653	1.60571	1.19253	1.17668	1.10701	0.995849	2.9825	1.14208	0.939396	0.291894
ECD_03424	valine-pyruvate aminotransferase; transaminase C; alanine-valine transaminase	-0.0338673	-0.495126	-0.630446	-0.532238	-0.41082	-0.391624	-0.54102	0.546266	-0.266023	-0.046588	-0.762396	-0.575937	-0.293412	-0.566564	-0.562228	-0.556673	-0.557255	0.0494884	-0.634844	-0.326954	-0.66092	-0.318327	-0.894951	-0.202014	-0.373807	-0.755162	-0.435147	-0.537443	0.0374119	0.0839789	0.0710198	-0.211664	-0.503611	-0.5345	-0.757317	-0.0301835	0.072935	-0.217338	-0.260861	-0.515904	-0.547636	-0.420408	-0.400424	0.0416448	0.317122	0.207971	-0.447092	0.0132043
ECD_02774	Zn-dependent metalloprotease-related protein	0.0980329	0.266917	0.171344	0.208181	-0.45743	0.203704	0.210221	0.185132	0.0524922	-0.0965964	0.518372	0.526413	1.55409	0.606509	0.557261	0.599624	0.604095	0.665673	0.742269	0.732681	0.73818	0.748336	0.642261	0.732909	0.691246	0.696268	0.720232	0.908995	0.00608122	-0.0295877	0.102468	-0.177543	-0.234515	-0.32638	-0.244806	-0.393233	-0.0864954	-0.231408	-0.228673	-0.277084	-0.175991	0.775314	-0.394068	-1.38031	2.12079	1.17118	0.32528	0.603595
ECD_02506	UPF0125 family protein	-0.306546	1.1892	0.324321	0.339842	0.99698	0.360185	0.351333	0.27151	0.871039	-0.35161	0.522257	0.529161	0.489797	0.588839	0.586065	0.59258	0.614108	0.410772	0.86654	0.849669	0.839689	0.857091	0.774686	0.847093	0.835683	0.835628	0.85802	0.671461	-0.286888	-0.0465526	-0.269238	0.192164	0.151261	0.482375	0.16297	0.465584	-0.359206	0.153844	0.169427	0.322822	0.177364	0.154161	0.18956	0.098635	-0.628673	0.450913	0.245742	0.46096
ECD_00761	putative ABC transporter ATPase	0.16048	0.377446	-0.0520592	0.00880409	0.109097	-0.0271366	0.0118704	-0.0794153	0.345367	0.386872	-0.0211055	-0.0581061	-0.0929564	0.0126791	-0.0127081	-0.00239152	0.0131227	0.0352092	-0.480197	-0.482508	-0.484479	-0.475022	-0.570731	-0.484762	-0.51161	-0.511518	-0.484127	-0.682378	-0.418811	0.0614284	0.25745	-0.00959199	-0.0151996	0.0657663	0.0291602	0.218117	0.245446	-0.00359047	0.14893	-0.0472512	0.0176667	-0.0143895	0.000684085	0.219665	-0.177889	0.474478	-0.172655	1.51243
ECD_00255	50S ribosomal protein L31 type B; alternative zinc-limitation L31 protein	0.218399	0.57406	0.529309	0.548442	0.954848	0.548746	0.967515	0.510709	0.337921	0.273111	0.0620409	0.0849378	0.00715045	0.136996	0.135915	0.149729	0.154041	0.441455	0.400341	0.392938	0.389504	0.415624	0.305483	0.390956	1.2543	0.348075	0.355502	0.0887973	0.513834	-0.325645	-0.217465	0.321099	0.2672	0.771035	0.282526	1.47396	0.0294536	1.12455	0.257353	1.13684	0.328101	0.250551	1.47346	-0.66024	2.4601	0.387057	0.561048	-1.00894
ECD_02084	colicin IA outer membrane receptor and translocator; ferric iron-catecholate transporter	-0.127965	-0.11382	-0.195613	-0.146777	0.0370338	-0.131526	-0.14675	-0.184624	0.232359	0.144561	0.111305	-0.036212	-0.0699465	-0.00361512	-0.00574325	0.00989371	0.0136628	-0.0904735	-0.0299206	-0.0481705	-0.0302684	-0.0297021	0.00595172	-0.0500447	-0.0736744	-0.0551146	-0.0515521	-0.1541	-0.0271922	0.373403	0.124002	-0.0145035	-0.0058784	0.193291	0.211173	-0.0551605	-0.0448548	0.0176268	0.145749	0.285207	0.0160732	0.0499551	0.0825485	0.195202	0.936598	-0.115156	0.20816	0.631769
ECD_02607	phosphoadenosine phosphosulfate reductase; PAPS reductase, thioredoxin dependent	-1.81028	2.58859	2.52804	2.53043	1.93604	2.59994	2.52176	2.46771	2.96698	-2.2542	1.82282	1.80656	1.76476	1.87946	1.86198	1.87828	1.9084	-1.61085	2.59784	2.57786	2.57277	2.57628	2.50513	2.58913	2.57165	2.57243	2.59471	2.80243	1.1359	0.440804	-0.459689	1.9878	1.95257	1.92139	1.9806	1.87259	0.446168	1.95776	1.9279	1.89829	1.99808	1.96368	1.77812	-1.56555	1.80621	1.07795	2.6846	1.21435
ECD_02785	HemN family putative oxidoreductase	-0.177268	0.59082	0.614287	0.543071	0.468701	0.528036	0.536243	0.513447	0.90405	-0.221452	0.670807	0.676281	2.96652	0.764363	0.718681	0.757174	0.769454	-0.549959	0.387745	0.379756	0.38787	0.399358	0.298967	0.378363	0.348828	0.350481	0.371093	0.742822	0.0304261	-0.0800797	0.0285948	0.372823	0.296663	0.397535	0.477029	0.130092	-0.351938	0.309693	0.299844	0.24748	0.362138	0.414255	0.460752	-0.397258	-0.305881	-0.217051	0.333853	0.0553197
ECD_03400	GNAT family putative N-acetyltransferase	-0.0277458	2.74999	-0.218796	-0.0679699	0.394008	-0.0762727	-0.0930829	0.122878	-0.043855	-0.227233	-0.148631	-0.286824	0.66217	-0.137361	-0.132979	-0.13499	-0.131454	0.226875	-0.140074	-0.18568	-0.155959	-0.180244	-0.387095	-0.206008	-0.156269	-0.245372	-0.047838	0.210662	-0.169415	0.0282203	-0.226431	-0.526701	-0.25038	0.332919	-0.160432	-0.253168	-0.282313	-0.518922	1.92963	-0.577328	-0.412913	-0.551029	-0.611389	0.183644	-0.705799	0.428077	-0.282832	0.45637
ECD_04043	DUF2065 family protein	-0.47051	0.236667	0.150555	0.175309	-0.855345	0.179537	0.216582	0.127103	-0.0276792	-0.0437111	0.301887	0.921364	0.185952	0.408801	0.404567	0.404507	0.421145	-0.289389	0.638327	0.629267	0.628139	0.597052	0.988091	0.588932	0.591546	0.572675	1.12403	0.785627	-0.0516377	-0.0839374	-0.171694	0.0766087	0.0705287	-0.144066	0.00706958	-0.240262	-0.0299942	0.0805311	0.00362342	-0.0447224	0.615461	0.0959439	-0.1415	-0.582178	-1.10217	0.550512	0.745426	0.543654
ECD_01198	putative invasin	-0.250803	-0.076335	-0.174848	-0.156346	-0.450396	-0.147969	-0.0501338	-0.174042	-0.203147	0.729219	1.58246	0.641312	0.592338	0.657652	0.649648	0.653462	0.666973	-0.113923	0.240251	0.226461	0.241097	0.242439	0.14896	0.2302	0.234117	0.211193	0.241529	0.121901	-0.70379	-1.22852	-0.251502	0.154079	0.104846	0.0879989	0.142072	0.0716087	-0.2394	0.089105	0.141328	0.164506	0.117771	0.120292	0.0388816	0.496736	2.96431	1.07188	0.335385	-0.396544
ECD_04134	D-gluconate kinase, thermosensitive	-0.0870005	-0.885136	-0.970936	-0.921476	-0.222892	-0.944907	-0.917537	-1.00665	-1.15056	0.321834	-0.467967	-0.480417	-0.567273	-0.391312	-0.356814	-0.36955	-0.341313	0.0383159	-0.629344	-0.630822	-0.63229	-0.616619	-0.746595	-0.639513	-0.666664	-0.6752	-0.672477	-1.12816	-0.182142	0.0593284	-0.0570548	-0.660143	-0.687703	-0.874914	-0.769739	-0.971685	0.295906	-0.673739	-0.769928	-0.80744	-0.628931	-0.725472	-0.933278	0.623237	0.0378248	-0.252892	-0.54291	0.0415611
ECD_02429	hca operon transcriptional regulator	0.238821	-0.249334	-0.349438	-0.28818	-0.809867	-0.0449404	-0.266506	-0.364397	-0.413153	-0.0186297	0.56788	0.004825	-0.0263162	0.0675403	0.0699714	0.0769729	0.0803388	0.445228	0.0400191	0.0365608	0.0441394	0.0604505	-0.0469915	0.0300717	0.0276614	0.0124346	0.0509127	-0.12979	0.0807432	0.270032	-0.35846	-0.454886	-0.499723	-0.515551	-0.488157	-0.590504	-0.193973	-0.481267	-0.466587	-0.531031	-0.470247	-0.550517	-0.338758	-0.433849	0.404524	-0.581425	-0.400473	-1.17649
ECD_00744	malonyl-ACP O-methyltransferase, SAM-dependent	0.0791316	0.984923	0.940102	0.961965	0.500044	0.93958	0.976331	0.905367	0.800138	0.726947	0.770766	0.728595	0.682139	0.811769	0.804423	0.781972	0.808407	0.621531	0.424981	0.421647	0.42152	0.424768	0.300787	0.409938	0.650924	0.394425	0.410334	0.183271	0.078237	0.747728	0.193766	0.0915806	0.09666	1.15768	0.129759	0.0571977	-0.0650316	0.078983	0.434171	0.0590481	0.120271	0.0957723	-0.0581381	0.473057	1.72793	-0.800916	0.35624	1.47398
ECD_00579	ribonuclease I	-0.0768514	0.25199	-0.0798373	-0.022649	-0.0960542	-0.0348934	0.257923	-0.0587139	-0.188559	-0.525823	-0.167667	-0.170279	-0.229373	-0.0866659	-0.0918143	-0.0765422	-0.0677927	0.0205605	0.0575647	0.188258	0.0538268	0.0607245	0.147569	0.034082	0.0111593	0.039223	0.0323718	0.0165779	0.00872121	-0.0939478	0.0579859	-0.176597	-0.206753	0.180114	-0.197889	-0.265278	0.0682878	-0.191904	-0.190818	0.124335	-0.163911	-0.0170399	0.168608	-0.159981	0.920009	-0.455997	0.344996	0.598467
ECD_01103	beta N-acetyl-glucosaminidase	-0.25277	-0.19687	-0.272335	-0.274148	0.434067	-0.251646	-0.216474	-0.288905	-0.311565	-0.282434	-0.432387	-0.41537	-0.451587	-0.403082	-0.411472	-0.392936	-0.388138	0.354908	-0.061965	-0.076037	-0.0538825	-0.0412442	-0.121862	-0.0766634	-0.0404493	-0.0719212	1.95624	-0.0709229	0.293336	0.716783	-0.714663	-0.870224	-0.913772	-0.841325	-0.849812	-0.80108	0.108147	-0.924957	-0.854143	-0.817427	-0.901633	-0.86874	-0.858683	0.946645	2.95556	-0.0263171	-0.328789	-0.799654
ECD_00388	proteolytic subunit of ClpA-ClpP and ClpX-ClpP ATP-dependent serine proteases	0.280757	0.435681	0.3559	0.396134	0.411947	0.483915	0.392837	0.37139	0.283015	-0.346821	0.53587	0.500811	0.486553	0.580334	0.585495	0.595947	0.597236	0.0788758	0.510649	0.509654	0.512765	0.534892	0.436822	0.501406	0.499244	0.481579	0.480679	0.370208	0.375138	-0.053321	-0.313693	0.13142	0.0898355	0.207623	0.104898	0.131675	-0.441628	0.10724	0.262909	0.0182102	0.159888	0.086303	-0.0694047	-0.44867	0.949329	-1.36102	0.509421	2.95303
ECD_00436	glutaminase 1	-0.0248896	-0.764815	-0.648512	-0.786436	0.166967	-0.79883	-0.789303	-0.837325	-0.902429	-0.224162	-0.265977	-0.600055	-0.627189	-0.54267	-0.535609	-0.521653	-0.516685	0.256037	-0.383514	-0.383976	-0.374185	-0.356241	-0.326882	-0.379098	-0.435668	-0.420338	-0.167415	-0.34072	0.0728952	0.0383273	0.0961074	-0.510422	-0.318579	-0.588357	0.173096	-0.104325	-0.00910121	-0.545201	-0.352002	-0.138746	-0.518573	-0.539307	-0.320815	0.206046	0.799106	0.113755	2.53094	0.0555367
ECD_03652	ketol-acid reductoisomerase, NAD(P)-binding	0.068665	2.94721	1.82023	1.57458	1.0419	2.17489	2.13296	1.95144	1.71568	-0.0468324	1.46325	1.54621	1.52876	1.23841	1.76339	1.92925	1.9745	0.0649484	-1.33591	-1.54746	-1.54321	-1.4119	-0.827257	-1.16569	-1.3569	-1.39113	-1.45647	-0.519243	-0.00887144	0.036329	0.0759232	-1.34253	-1.15324	-0.529846	-0.989605	-0.638814	0.146997	-1.51345	-0.807408	-0.403217	-1.04115	-0.649286	-1.16983	0.469673	-0.045036	0.10879	0.850682	0.624792
ECD_03385	DUF2636 family cellulose production small membrane protein	0.0475601	-0.634737	-0.789891	-0.669733	-0.52628	-0.66066	-0.520064	-0.632481	-0.971646	0.00130834	2.79948	-0.333317	2.94604	-0.650967	-0.655959	-0.660734	-0.665753	0.0131285	-0.772242	-0.786473	-0.77478	0.0441263	-0.674705	-0.801791	-0.769306	-0.335064	-0.301938	-0.735953	-0.0706356	-0.20726	-0.220196	-1.19813	-1.19158	-0.256213	-1.34794	0.03909	0.00990545	-0.652779	-0.457156	0.0496505	-1.07068	0.199166	-0.874456	0.141332	0.827443	-0.0894035	-0.504254	-0.267747
ECD_03252	ribosome-associated heat shock protein Hsp15	0.113384	-1.6983	-1.25793	-1.7301	-1.1097	-0.637245	-1.70479	-1.83692	-0.706767	-0.237856	-2.21058	-2.1872	-2.34888	-2.06968	-2.07331	-2.03975	-2.06273	0.145681	-2.03506	-2.03631	-1.5641	-2.03889	-0.263417	-2.04348	-2.1082	-2.08118	-2.16247	-1.51999	-0.203399	-0.129427	0.00569359	-1.94554	-2.00767	-1.67693	-1.31658	-0.537206	-0.0886738	-1.95529	-2.03396	-2.15511	-1.88654	-1.53821	-1.40617	0.50659	0.116985	-0.160989	-1.98022	-0.715799
ECD_01904	IS2 transposase TnpB	-0.166291	0.036451	-0.00718804	0.136011	0.0389875	0.0384327	0.0179907	-0.0204673	-0.0820709	-0.334109	0.213265	0.21642	0.433957	0.237233	0.2313	0.254159	0.252934	-0.529394	-0.393491	-0.433369	-0.404203	-0.387199	-0.028689	-0.400906	-0.412989	-0.416049	0.0166389	0.288809	0.0902144	0.113362	-0.319973	-0.443627	-0.389652	-0.482767	-0.461084	-0.135382	-0.401221	-0.362915	-0.470561	-0.49727	-0.412364	-0.504447	-0.553458	0.569981	0.145702	-0.471825	0.434824	-0.49299
ECD_01226	membrane spanning protein in TonB-ExbB-ExbD transport complex	0.274799	0.455293	0.389187	0.410784	0.92693	0.436795	0.49247	0.381579	0.313285	0.179393	0.596043	0.60532	0.563546	0.625845	0.616779	0.629341	0.638848	0.436874	-0.0163584	-0.0304681	-0.0155013	-0.00658693	-0.147962	-0.0268406	-0.0212837	-0.0399138	-0.0391506	-0.175072	0.509456	-0.0160711	-0.197548	1.27538	1.21263	1.20225	1.26308	2.3416	-0.0552159	1.21392	1.23364	1.24676	1.23595	1.22882	1.16688	-0.256098	1.52832	-0.338044	0.836591	-0.498794
ECD_02218	sugar phosphatase	-0.0361073	0.45693	0.366299	0.41087	-0.0646602	0.415785	0.438286	0.370091	0.257193	0.657163	0.00394038	0.523593	-0.042534	0.041414	0.0415949	0.0620386	0.0460561	0.263358	0.12618	0.11342	0.141653	0.123649	0.0407552	0.0899147	0.128099	0.0927957	0.131216	0.533735	0.176843	-0.588376	0.456392	0.490168	0.44001	0.451746	0.49271	0.401986	0.517474	0.459698	0.435955	0.429098	0.459112	0.472557	1.0972	0.39589	1.111	0.0474364	0.428788	-0.86696
ECD_00791	putative pyruvate formate lyase activating enzyme	-0.181972	0.504913	-0.783614	-0.720077	0.214144	-0.747226	-0.723961	-0.817263	-0.890202	-0.185015	-0.439508	-0.485535	0.758081	-0.405662	-0.416362	-0.407453	-0.398125	-0.175306	-0.741848	-0.737602	-0.751093	-0.738727	-0.828833	-0.740678	-0.792962	-0.774523	-0.758701	-0.0141476	-0.581676	-0.0674121	0.0154014	-0.962374	-1.00799	-1.0536	-0.933235	-0.119022	-0.60182	-0.994071	-0.993997	-0.996079	-0.971904	-0.99658	-1.11303	0.0451488	-2.69818	-1.57376	-0.671158	1.91883
ECD_03776	formate dehydrogenase formation protein	0.000561771	0.0999804	-0.0214839	0.250199	0.129202	0.00809718	0.410497	-0.00503073	-0.171584	0.0536876	-0.00513756	0.00121537	-0.079437	0.102818	0.121101	0.107932	0.115729	0.263549	0.263954	0.22959	0.497767	0.253263	0.0464586	0.228386	1.08433	0.184132	0.673315	-0.0455563	0.374446	-0.331118	-0.249905	-0.174638	-0.233719	-0.0105454	0.248454	0.0957137	-0.169705	-0.219027	0.456442	0.675667	-0.134615	-0.202498	-0.192469	-0.20581	0.623938	0.21577	-0.114289	-0.24512
ECD_00107	putative prepilin peptidase-dependent pilin	0.197711	0.0422147	0.00371569	0.0191181	0.0484951	0.190186	0.0268084	-0.0252621	0.0324021	0.0223178	-0.202409	-0.189856	-0.0167456	-0.120675	-0.120288	-0.105451	-0.11378	0.0246714	-0.128777	-0.121256	-0.123288	-0.112101	0.00828708	-0.134317	-0.177062	-0.181138	-0.148783	-0.246248	0.00407325	0.00810611	-0.198635	0.0410315	-0.284495	-0.32572	-0.296493	-0.338184	-0.286782	-0.254166	-0.315839	0.178552	-0.212175	-0.342617	0.182829	-0.41835	0.508669	0.0709786	-0.121676	0.0492806
ECD_03730	TatABCE protein translocation system subunit	0.157072	0.686424	1.03317	0.659642	-0.240001	1.13056	1.06472	0.84018	0.391179	-0.459529	0.32712	0.313655	0.260315	0.463187	0.443605	0.447336	0.471847	0.307528	1.10571	1.07918	1.09639	1.51738	0.891633	1.08331	1.01431	1.02617	0.948038	0.437367	0.26049	0.260522	-0.21934	0.874047	0.693254	0.0260695	0.186579	-0.160455	-0.0688237	0.268886	1.02028	0.111173	0.378605	0.296117	0.437153	-1.25426	0.442048	0.490104	0.834319	0.044538
ECD_03754	sensory histidine kinase in two-component regulatory system with GlnG	0.232474	0.613238	0.708676	0.591878	0.128497	0.604373	0.582958	1.00853	0.587889	-0.202179	0.468675	0.48035	0.63623	0.582304	0.575481	0.585544	0.596995	-0.147287	0.708893	0.667385	0.700446	0.70236	0.640259	0.675712	0.625034	0.611375	0.565412	0.427858	-0.228819	0.0377896	-0.0182527	0.782548	1.11209	0.477001	0.94484	0.551766	0.0349098	2.7882	0.662117	0.645307	0.815648	0.760976	0.768801	-1.16795	-0.240871	0.0978944	0.387746	-0.0841052
ECD_03287	gluconate transporter, low affinity GNT 1 system	-0.137295	0.117004	0.0253921	0.100776	0.243578	0.269378	0.259932	-0.0318069	0.452569	0.273817	0.114366	0.123433	2.91489	0.229201	0.222642	0.252295	0.245194	0.208657	0.426432	0.785665	0.428687	0.421585	0.232538	0.401619	0.352233	0.377446	0.659305	0.710973	-0.115921	0.270637	0.173725	0.189245	0.154715	0.0780818	0.223559	-0.22513	0.0678032	0.400164	0.0925601	-0.0159105	0.29564	0.170651	-0.0926704	-0.148919	-0.935381	0.485451	0.1399	1.40927
ECD_03935	redox-sensitive transcriptional activator of soxS; autorepressor	0.0626137	-0.192155	-0.576257	-0.493256	-0.945126	-0.584361	-0.564556	-0.590242	-0.310067	-0.348942	-0.367236	-0.404906	-0.487311	-0.29918	-0.303755	-0.293419	-0.305347	-0.628984	-0.330945	-0.357967	-0.342696	-0.332302	0.0549393	-0.356062	-0.395356	-0.0206519	0.0844527	0.295553	-0.00594692	0.0694142	0.0193161	-0.205557	-0.253741	-0.469227	-0.302769	-0.569636	-0.0340217	-0.233255	-0.322517	-0.099725	-0.165212	-0.281947	0.398392	0.0190809	-4.1836	0.331183	-0.437635	-0.507398
ECD_00755	UPF0104 family inner membrane protein	0.231128	0.161911	0.551471	0.155446	0.306347	0.11787	0.163351	0.0786364	0.368911	0.0752454	0.283921	0.246279	0.208621	0.300141	0.292978	0.291536	0.318087	-0.00364103	0.449829	0.442008	0.449152	0.451823	0.340889	0.440422	0.420964	0.428273	0.732214	0.238872	-0.224946	0.0650046	-0.0556313	0.237322	0.204195	0.156209	0.44106	0.163526	-0.0822318	0.20698	0.401572	0.183834	0.254829	0.219966	0.656123	-0.477416	-0.339399	0.153027	0.22919	0.417035
ECD_00473	N5-carboxyaminoimidazole ribonucleotide mutase	0.00221152	-1.05704	-1.11212	-1.08881	-1.68172	-0.211229	-1.07073	-1.1197	-1.21297	-0.282684	-0.607897	-0.625154	-0.658184	-0.574754	-0.575421	-0.554769	-0.558494	0.130623	-0.88485	-0.889355	-0.87221	-0.881603	-0.328663	-0.894258	-0.94122	-0.907036	-0.877571	-0.121084	-0.104342	0.203983	-0.199202	-0.769991	-1.37085	-1.41804	-1.40148	-1.46737	-0.0571777	-1.34692	-1.35073	-1.39309	-1.33993	-1.36643	0.00502213	-0.0297643	-3.60797	-0.0805843	-0.966541	0.0730626
ECD_03339	hypothetical protein	-0.368636	0.0932417	-0.0242961	0.0705111	1.10675	0.0900686	0.0499675	-0.0525369	0.323029	-0.345756	0.450308	0.457133	-0.658955	-0.403105	-0.410461	-0.390046	-0.407083	-0.0684683	-0.0343918	-0.0454688	-0.029393	-0.050868	-0.239129	-0.0504932	-0.11395	-0.103824	0.397192	1.68301	0.219319	-0.402672	-0.175824	-0.51544	-0.522749	-0.137009	0.495612	-0.970797	-0.228713	-0.519255	-0.60564	-0.136881	-0.424647	-0.516774	0.0173205	-0.52992	0.184043	-0.714756	-0.563543	-2.75104
ECD_01923	histidinol-phosphate aminotransferase	-0.053019	-0.165303	-0.208167	-0.162458	0.263263	0.998331	-0.180349	1.04169	-0.282278	0.25405	-0.0800471	-0.0785193	-0.13522	-0.0524706	-0.0592538	-0.0394754	-0.044689	-0.195274	-0.286917	-0.325755	-0.315568	-0.290869	-0.313824	-0.307275	-0.306811	-0.311232	-0.298951	-0.0211504	0.0705125	-0.12499	-0.150299	-0.428271	-0.456236	0.0636461	-0.432987	-0.452239	-0.121515	-0.439039	-0.467528	0.329222	-0.440741	0.266911	-0.555451	0.118586	2.13679	-1.1705	0.0500369	0.729803
ECD_03783	putative peptidase	0.0385381	-0.171959	2.31897	-0.203239	-0.590384	0.0212194	-0.116227	-0.275328	-0.444985	-0.111055	-0.405795	-0.214106	-0.300738	-0.31001	-0.298325	-0.298844	-0.304738	0.0456915	-0.305898	-0.343927	-0.312918	-0.325743	-0.504168	-0.337764	-0.427178	-0.413608	-0.326559	0.0297276	-0.366749	0.228745	0.0980652	-0.357836	-0.407522	-0.515055	-0.24537	-0.55489	0.0253406	-0.405872	-0.206436	-0.571931	-0.310226	-0.064099	-0.24551	-0.31527	-0.252764	-0.44169	-0.300878	-0.0638952
ECD_02548	regulatory protein for RecA	-0.450792	1.08516	1.02405	1.0489	0.451441	1.07021	1.0494	1.01249	0.895235	-0.197974	1.62506	1.61651	1.55991	1.68145	1.68036	1.68291	2.90374	0.462911	1.82326	1.80113	1.81253	1.80243	1.97663	1.81238	1.8113	1.79849	1.84509	1.6639	-0.251584	-0.480688	-0.00270281	1.97465	1.93999	1.91734	2.16969	1.85317	-0.237199	1.94476	2.22088	1.89591	1.99544	1.94043	1.75912	-1.65969	-1.90518	0.484252	1.271	0.0955286
ECD_04037	methyl-directed mismatch repair protein	0.00464075	2.42108	1.86812	0.302741	0.35851	0.277653	0.312759	0.225198	2.9023	-0.181921	0.14464	0.297264	1.88459	0.25055	0.247142	0.251424	1.64921	0.0791048	1.79955	0.121191	0.303342	0.261465	-0.0696615	0.0827566	0.587533	0.0583333	0.0323718	-0.114755	0.0228597	0.318788	-0.142856	0.0801891	2.03207	0.30637	0.500535	0.391489	0.0407211	0.290524	0.00510267	0.220358	0.182555	0.606609	-0.137801	0.357624	0.612221	0.365277	0.0514901	1.17653
ECD_01074	flagellar component of cell-distal portion of basal-body rod	-0.0886749	-0.810166	-0.874085	-0.865142	-1.10876	-0.42929	-0.801977	-0.884168	-0.944572	0.634678	-0.403369	-0.389217	-0.421348	-0.361255	-0.3662	-0.359137	-0.375334	-0.464967	-1.05118	-1.06347	-1.04538	-1.05165	-0.734301	-1.0662	-1.08592	-1.0869	-1.06324	-1.16431	-0.142186	0.585648	-0.253912	-1.09184	-1.14901	-1.08685	-1.09722	-1.09768	0.0426706	-1.13377	-1.10138	-0.593878	-1.11672	-1.113	-0.755049	-0.348448	-0.451678	0.815511	-0.739217	0.218773
ECD_00624	hypothetical protein	-0.146176	0.492156	0.433757	0.462251	0.560236	0.768036	0.462048	0.421029	0.405442	0.0271775	0.219899	0.190997	0.471482	0.301809	0.29697	0.281266	0.320828	-0.0532067	0.32522	0.313046	0.302318	0.318394	0.192307	0.31123	0.289581	0.307203	0.366709	0.164146	0.335994	0.112649	0.204892	0.483937	0.468542	0.554365	0.501134	0.423889	0.201579	0.486215	0.683693	0.521105	0.522135	0.730672	0.537514	-0.326319	0.746078	0.531515	0.744022	0.171023
ECD_00387	peptidyl-prolyl cis/trans isomerase (trigger factor)	0.0652557	-0.233549	-0.311004	-0.266661	0.53525	-0.111113	0.188753	-0.29735	-0.0153287	0.103647	-0.4163	-0.45095	-0.461172	-0.376757	-0.36986	-0.353067	-0.366242	0.111722	-0.30481	-0.306488	-0.305728	-0.280558	-0.380859	-0.310736	-0.319245	-0.332713	-0.339148	-0.100108	-0.0778322	0.141641	0.155758	-0.477526	0.0197662	-0.322583	-0.402431	-0.099206	0.0303626	-0.497949	-0.525296	-0.590166	-0.451873	-0.379933	-0.67691	1.13674	1.60811	-0.215324	-0.358598	1.57811
ECD_01078	flagellar hook-filament junction protein 1	0.0279792	-0.193269	-0.255242	-0.250318	0.893492	-0.233469	-0.193123	0.114143	-0.333634	0.0566975	-0.00253978	0.00307381	-0.0335209	0.0216048	0.016221	0.0353617	0.0318673	-0.0123949	-0.129514	-0.15318	-0.133978	-0.145423	-0.255136	-0.154551	-0.141511	-0.157089	-0.130671	-0.242017	0.378546	-0.0410776	-0.306156	-0.490577	-0.557867	-0.118735	-0.472743	-0.483082	0.130863	-0.551112	-0.527058	0.0393945	-0.523513	-0.272704	-0.247344	-0.73852	1.14536	-0.296766	-0.444507	-0.289988
ECD_01581	fumarate hydratase (fumarase A), aerobic Class I	0.204733	-0.0913353	-0.121767	-0.0922305	-0.156294	-0.12938	-0.0834314	0.0362597	0.0497965	-0.0895458	-0.553016	-0.411344	-0.547487	-0.511915	-0.50626	-0.481469	-0.505502	-0.209121	-0.219128	-0.276872	-0.267162	-0.268114	-0.335674	-0.278665	-0.283412	-0.304881	-0.262194	-0.399686	-0.274917	-0.147063	-0.344769	-0.353849	-0.466806	-0.423748	-0.403559	-0.305962	-0.444654	-0.425225	-0.29759	-0.401251	-0.368429	-0.463554	-0.37754	0.175355	1.16471	-0.908902	-0.201734	-0.7795
ECD_01188	SIRB family inner membrane protein	-0.0232881	-0.634615	-0.734391	-0.735512	0.0802896	-0.708269	-0.609239	-0.728628	-0.727293	0.0463364	-1.07929	-1.05415	-1.09513	-1.05692	-1.06257	-1.04589	-1.06025	-0.116836	-1.1746	-1.17788	-1.1575	-1.14829	-1.24894	-1.17538	-1.1793	-1.20364	-1.16395	-1.20688	0.227161	0.685972	0.358803	-0.825571	-0.867059	-0.821998	-0.81024	-0.819476	-0.181536	-0.87959	-0.798864	-0.762652	-0.86025	-0.834152	-0.843533	-0.176312	2.89403	-2.35152	-0.87703	-1.29709
ECD_00271	c-di-GMP-specific phosphodiesterase	-0.249133	0.413607	0.750574	0.391431	0.686819	0.374805	0.667509	0.332293	0.180836	-0.23491	0.378019	0.603126	0.321486	0.441707	0.447209	0.459539	0.466154	0.143048	0.674087	0.690601	0.671064	0.68208	1.24988	0.677529	0.64934	0.638145	0.646651	0.619215	0.254651	0.104447	-0.357292	0.0812779	0.00419354	0.0166864	0.0360962	-0.12833	-0.137334	0.0495506	0.571428	0.219771	0.378546	-0.00856407	0.805319	-1.34274	-0.980136	0.385228	0.401077	-0.980973
ECD_00633	N-acetylglucosamine-inducible nag divergent operon transcriptional repressor	-0.400272	2.21493	2.17152	2.17778	1.60376	2.21381	2.16461	2.09474	2.02432	-0.36462	1.63756	1.61696	1.55699	1.71774	1.70664	1.69418	1.75941	-0.447353	1.00465	0.984198	0.978006	0.984359	0.870526	0.991574	0.961836	0.991013	0.965631	0.719317	-0.145002	1.16762	0.0656848	1.22534	1.18958	1.15221	1.22445	1.17353	-0.00624473	1.19502	1.2043	1.12689	1.24345	1.19919	1.03997	-0.545588	-0.732584	-0.380006	1.66067	2.89143
ECD_03979	zinc-ribbon family protein	0.0792648	0.316506	0.174001	0.0412545	1.09616	0.00110924	0.0335125	0.449058	-0.148844	-0.0584246	0.341122	-0.00398669	0.219182	0.0728082	0.0689278	0.0734711	0.0615533	0.278254	0.130435	0.126105	0.110938	0.11793	-0.055728	0.0993451	0.0785542	0.0756894	0.469922	-0.143628	0.0824147	-0.118198	0.269539	0.949743	0.0101275	0.611586	-0.00994574	0.703413	0.05471	0.0444125	-0.0435786	-0.0723966	0.10446	0.0173641	0.691544	-0.129237	-0.77676	-0.245778	-0.153561	-0.412804
ECD_01972	uridine/cytidine kinase	0.315998	0.877873	0.814544	0.848124	0.505925	0.85631	0.834955	0.806429	1.23077	-0.170716	0.830467	0.831979	0.762054	0.889236	0.877825	0.885955	0.897839	0.138178	0.383173	0.345051	0.383655	0.378038	1.95704	0.354585	0.360078	0.367951	0.372801	1.03522	0.254935	-0.566088	-0.424724	0.211918	0.201551	0.186083	0.215211	0.176694	-0.827247	0.222042	0.18995	0.185808	0.24269	0.156108	0.0921999	-0.469478	2.88795	0.511376	1.10694	0.137906
ECD_04196	hypochlorite-responsive transcription factor	0.0314943	-0.483665	-0.215697	-0.157055	-0.744902	-0.54244	-0.518664	-0.607001	-0.750985	-0.13108	-0.153472	-0.161363	-0.260043	-0.075583	-0.0415192	-0.0558459	-0.0239873	0.446108	-0.26316	-0.266527	-0.267807	-0.253017	0.229137	-0.274989	0.187767	-0.307709	0.0175934	0.315677	0.0724349	0.0531926	0.00925316	-0.340149	-0.366882	0.0541826	0.90569	0.823496	-0.0553426	-0.353549	-0.459559	-0.487931	-0.307911	0.276038	0.384388	-0.366323	0.73941	-0.48116	0.312505	-0.0261282
ECD_02395	cyclic-di-GMP phosphodiesterase, anaerobic	-0.336367	0.304613	0.220419	0.265332	0.134996	0.265842	0.34919	0.269079	0.347859	-0.329858	0.492544	0.483127	0.45224	0.532419	0.530279	0.543593	0.555807	0.0652842	0.339986	0.325762	0.335025	0.3511	0.237577	0.314541	0.309018	0.300435	0.341018	0.189047	0.285299	-0.254437	-0.0297817	0.307429	0.398041	0.253139	0.524582	0.254917	0.197503	0.287937	0.297358	1.79402	0.308282	0.214311	0.339981	-0.358545	-0.183985	0.0450451	0.353038	-0.447658
ECD_02445	regulatory protein P-II for glutamine synthetase	-0.581351	0.252459	-0.122566	-0.0766332	-0.576636	-0.0713977	-0.0618812	-0.153908	-0.178848	0.35885	0.602735	0.608703	0.582752	0.68474	0.679179	0.692512	0.707996	-0.101868	0.206714	0.200547	0.207896	0.223824	0.123744	0.193894	0.19743	0.180665	0.215773	0.159686	0.163118	0.0360893	0.357206	0.461368	0.411845	0.974815	0.452433	0.33418	0.0879924	0.429253	0.445965	0.375354	0.444891	0.391981	0.678375	0.0332031	-2.52496	-0.141306	0.139319	0.956169
ECD_02434	phenylpropionate dioxygenase, ferredoxin reductase subunit	-0.0138848	0.30583	0.20757	0.264669	1.29491	0.268664	0.357628	0.184637	0.324844	0.0383068	0.059433	0.0685165	0.13683	0.142152	0.136485	0.140252	0.152799	0.0429001	0.00462467	-0.00170318	0.00573046	0.0224465	-0.0811986	-0.00937255	-0.00503042	-0.0191078	0.0113721	-0.0452582	0.110256	0.0711978	0.048529	0.371639	-0.195732	-0.220968	-0.105553	0.277142	-0.0157863	-0.178649	-0.15889	-0.230892	-0.163646	-0.243925	0.289401	0.32991	-1.42936	0.392014	0.0847707	-0.240771
ECD_03441	signal-anchored membrane fusion protein (MFP) component of efflux pump	0.213402	0.431373	0.693376	0.403353	0.0949847	0.897092	0.405019	0.287897	0.448552	0.15702	0.504055	2.87958	0.399763	0.378289	0.385683	0.380756	0.808655	-0.0455898	0.25978	0.239273	0.235505	0.244498	0.0782804	0.201485	0.111789	0.146564	0.206061	0.454862	0.0527375	0.0977758	-0.0236631	0.342589	0.38272	0.308098	0.317928	0.409542	-0.0300814	0.210624	0.341405	0.543859	0.132876	0.100743	0.439577	-0.25298	0.250666	0.156433	0.0441523	-0.0666783
ECD_02202	NADH:ubiquinone oxidoreductase, membrane subunit M	-0.519623	0.861927	0.763736	0.8214	0.364121	0.79195	0.836994	0.767899	0.657768	-0.327701	0.275978	0.125677	0.0775588	0.160857	0.1552	0.179868	0.176715	-0.583202	0.230059	0.209859	0.241838	0.228557	0.322165	0.342343	0.221408	0.191267	0.231507	0.609218	-0.346609	0.277873	-1.16804	0.176972	0.129961	0.388571	0.159718	0.0876996	-1.17994	0.321658	0.124408	0.123029	0.147639	0.161298	0.242821	0.239541	-0.237668	0.107337	-0.208252	-0.263946
ECD_01929	regulator of length of O-antigen component of lipopolysaccharide chains	0.179242	-1.79142	-1.46058	-1.79168	-1.23597	-1.8012	-1.78731	1.17196	-1.89061	0.185328	-1.36832	-1.6457	-1.46665	-1.24347	-1.63652	-1.59515	-1.62939	0.261417	-1.87645	-1.90879	-1.89862	-1.87275	-1.7188	-1.57965	-1.51355	-1.90477	-1.74415	-1.16968	0.411767	0.160384	0.154815	-2.02353	-1.70788	-2.05604	-1.89514	-1.68126	0.0213295	-2.0276	-1.74047	-2.06036	-2.01452	-1.75079	-1.93128	1.00203	0.979525	0.333891	-1.64396	-0.385639
ECD_02904	3',5' cAMP phosphodiesterase	0.0267591	0.847876	0.740801	0.797769	2.87253	1.09877	0.755562	0.810221	0.603611	-0.200936	0.385315	0.403014	0.291628	0.45815	0.445643	0.457722	0.468131	0.0394218	0.538024	0.512755	0.517	0.528202	0.381625	0.505529	0.686066	0.614993	0.766679	0.445631	0.00428986	-0.00313835	0.0823133	0.530921	0.471685	0.528459	0.473805	0.283758	0.179777	0.614657	0.604366	0.416004	0.517324	0.423979	0.510981	-0.849434	-0.781257	-0.819471	0.589286	-0.567249
ECD_01486	UPF0056 family inner membrane protein	0.222576	1.08453	1.07136	1.12169	0.77875	1.05844	1.0881	1.00845	0.985209	0.218182	0.627302	0.626361	0.601055	0.648864	0.653049	0.667026	0.656601	-0.817445	1.03476	1.03806	1.04862	1.04458	0.950324	1.03714	1.05156	1.02197	1.06643	0.930927	-0.415286	0.254387	0.589584	1.2412	1.16269	1.16873	1.20538	1.09727	-0.746348	1.16481	1.1993	1.14823	1.20163	1.14602	1.10824	-1.30883	2.87153	0.18857	0.89734	0.230043
ECD_00932	aspartate aminotransferase, PLP-dependent	-2.26267	-0.430551	-0.48992	-0.484704	-0.653718	-0.444524	-0.431302	-0.497092	-0.518184	0.495647	-0.458992	-0.430528	-0.485112	-0.418919	-0.427793	-0.406749	-0.416704	-0.296283	-1.08754	-1.08821	-1.06958	-1.04625	-1.1147	-1.08685	-1.09825	-1.10477	-1.07589	-1.16537	-0.075371	0.293053	-1.02897	-1.19565	-1.23521	-1.23393	-1.15549	-1.15966	-0.287311	-1.22101	-1.20736	-1.18409	-1.2322	-1.23278	-1.26731	2.04253	-1.66534	-1.85786	0.0332954	2.87031
ECD_00021	putative usher protein	-0.496988	0.78334	0.752866	0.75227	0.0580603	0.773187	0.737549	0.694074	0.523533	-0.180261	0.506106	0.518235	0.450962	0.593064	0.591651	0.599856	0.606648	-0.516883	0.637163	0.642212	0.640458	0.6505	0.538863	0.629453	0.593522	0.586525	0.619488	0.868334	-0.536709	-0.121443	-0.633264	0.202713	0.170028	0.130469	1.17486	-0.00194805	-1.05399	0.199317	0.136447	1.46995	0.243396	0.112939	0.665254	-0.682129	-2.9341	0.585823	0.21563	-1.42483
ECD_01919	putative epimerase	0.288345	0.176679	0.142202	0.186197	0.250895	0.173396	0.168347	0.307851	0.0665919	-0.246634	-0.0601114	0.21161	-0.115142	-0.0326085	-0.0393826	-0.0194543	-0.0150878	-0.17638	0.0390008	0.0113457	0.0213838	0.0416263	0.0211938	0.0105341	0.0230058	0.0217922	0.123192	-0.112253	0.134073	0.144291	-0.0257352	0.143932	-0.0275423	-0.018405	0.00599749	-0.0174818	0.203451	-0.0138773	0.155621	0.202397	-0.00839997	-0.0468142	0.218374	0.628357	0.168133	0.278191	-0.0719822	-0.560761
ECD_04373	UV-inducible membrane toxin, DinQ-AgrB type I toxin-antitoxin system	-0.429274	0.847813	-0.377887	-0.277472	0.550702	-0.264041	-0.300232	-0.400109	-0.590678	-0.524315	-0.494709	-0.498626	0.917137	-0.380091	-0.385624	-0.365923	-0.390395	-0.36822	-0.224834	-0.230771	-0.213701	-0.235645	-0.425515	-0.249998	-0.310282	-0.297015	-0.356191	-0.283724	0.116487	-0.0317033	0.429916	0.129478	0.126783	-0.151625	0.00599749	-0.32365	0.161923	0.152147	0.0318287	-0.0608321	0.230899	0.130497	0.683365	-0.135787	0.709296	-0.245744	-0.230011	2.8684
ECD_03046	transcript cleavage factor	-0.170834	0.52481	0.419235	0.454248	0.866724	0.443528	0.466819	0.372677	0.307596	-0.890101	-0.229369	-0.228892	-0.323799	-0.148008	-0.145506	-0.139813	-0.140278	-0.185142	0.0525384	0.0335685	0.0279015	0.0582787	-0.118355	0.031857	-0.00477125	-0.00703283	-0.0168583	-0.369951	-0.237026	0.197937	-0.125233	-0.129075	-0.169697	-0.320122	-0.198896	-0.271861	-0.500788	-0.185108	-0.236301	-0.27166	-0.115453	-0.203626	-0.349329	0.150068	0.0975773	-0.787452	0.274542	-0.275875
ECD_00343	manno(fructo)kinase	0.0883118	-0.454824	-0.541626	-0.476872	-0.770796	-0.476635	-0.464073	-0.533698	-0.61542	-0.0458512	-0.634289	-0.352675	-0.357228	-0.597961	-0.588907	-0.568399	-0.578124	-0.0462809	-0.807368	-0.791919	-0.801309	-0.770092	-0.876196	-0.812864	-0.716086	-0.663886	-0.812335	-0.298122	0.0100043	0.194289	-0.126812	-0.571986	-0.66787	-0.699466	-0.388242	-0.6563	-0.00841982	-0.793866	-0.82731	-0.859085	-0.753798	-0.826343	-0.473718	0.373079	-0.343753	-0.279312	-0.476592	0.00977045
ECD_00887	ATPase and specificity subunit of ClpA-ClpP ATP-dependent serine protease, chaperone activity	0.351229	-0.270063	-0.334287	-0.307938	0.0813486	-0.283536	-0.288175	-0.350845	-0.156427	0.133485	-0.469129	-0.448248	-0.503032	-0.435866	-0.441766	-0.42242	1.21102	-0.00284565	-0.781296	-0.786514	-0.775616	-0.758801	-0.860491	-0.787146	-0.801907	-0.800653	-0.786138	-0.733626	-0.0629088	0.202461	-0.051849	-0.54151	-0.387482	-0.625222	-0.417538	-0.192618	-0.0321671	-0.581193	-0.603505	-0.577014	-0.578159	-0.467232	-0.481334	0.308644	-0.221498	-0.981284	-0.551249	0.156632
ECD_03780	formate dehydrogenase formation protein	-0.188961	0.106493	0.262353	0.0769525	-0.0258333	0.00909154	-0.0257218	0.184702	0.175008	0.186399	0.164889	0.30853	2.86284	0.265481	0.275846	0.270486	0.27567	-0.0774389	0.229731	0.188905	0.220201	0.206226	0.0265816	0.195406	0.263848	0.123973	0.0996067	0.162112	0.226022	0.119898	-0.205753	0.473504	-0.131633	0.17373	0.430492	0.612872	-0.169566	-0.116254	-0.205999	-0.00379929	-0.0212931	0.37842	0.0793507	-0.0737587	0.320383	-0.081382	0.108641	-0.188357
ECD_03746	periplasmic protein disulfide isomerase I	-0.177759	1.35832	1.2494	1.3367	0.565675	1.4664	1.25125	1.52949	1.28158	-0.755927	0.320022	0.327902	0.470613	0.615985	0.433641	0.435129	0.44744	-0.250383	0.726042	0.686635	0.725108	0.945306	0.495505	0.702923	0.626738	0.619572	0.566653	0.475207	-0.242712	0.0440106	-0.520874	0.371577	0.250787	0.59743	0.916542	-0.0550981	-0.358268	0.243017	0.34105	0.5674	0.329867	0.262405	0.307185	0.240159	0.873011	-0.244915	-0.26409	0.64681
ECD_02035	hypothetical protein	-0.310613	0.183411	0.116013	0.153998	-0.183508	0.171183	0.145782	0.504832	0.0321912	-0.473993	0.155808	0.147486	0.102465	0.187979	0.183134	0.213666	0.180706	0.114293	0.594617	0.571768	0.597906	0.604932	0.53519	0.58117	0.589917	0.576601	0.577027	0.396348	0.105019	-0.345401	0.529457	0.70007	0.679783	0.987628	0.708347	0.665675	-0.236297	0.701252	0.667423	1.07159	0.728623	1.35918	0.909506	0.381883	-1.46221	-0.0449316	0.473164	1.24256
ECD_02831	putative type II secretion protein GspK	-0.0201238	2.84967	-0.132786	-0.243092	-0.253583	0.131145	-0.236158	-0.272711	-0.190416	0.21911	-0.00445927	0.0124613	-0.0603653	0.063364	0.0473542	0.0747173	0.0697963	0.25459	-0.403617	-0.412449	-0.400033	-0.399182	-0.499227	-0.411095	-0.168551	-0.39534	-0.431203	-0.714965	0.0189022	0.0701836	-0.265422	-0.231706	-0.295312	0.519044	-0.291899	-0.149867	0.430673	-0.287021	0.0475549	0.0107252	-0.236078	-0.316237	-0.114828	-0.0214279	-0.472951	0.329995	-0.033828	-0.357092
ECD_00059	membrane-anchored DnaK co-chaperone, DNA-binding protein	-0.0263458	-0.185981	-0.224599	-0.208938	0.674587	-0.209315	-0.200858	0.413679	-0.236103	-0.0338555	-0.575548	-0.563165	-0.627901	-0.491584	-0.491937	-0.479806	-0.48181	0.0209638	-0.465496	-0.457736	-0.45981	-0.448515	-0.31275	-0.470827	-0.51422	-0.518028	-0.48575	0.0375186	-0.0826371	-0.0749729	0.0946502	-0.765313	-0.637116	-0.666835	-0.724783	-0.668013	-0.100239	-0.764376	-0.825235	-0.848291	-0.72399	-0.854519	-0.493476	0.0452892	-0.183121	0.319016	-0.421421	-0.746769
ECD_00130	aspartate 1-decarboxylase	0.415523	0.0409464	0.00371328	0.0163292	-0.0101342	0.0198263	0.0202632	-0.0302331	-0.198677	0.0816127	-0.183614	-0.171237	-0.236063	-0.0997539	-0.10012	-0.088014	0.0807636	0.0248288	-0.704283	-0.695335	-0.697509	-0.685653	-0.798093	-0.708569	-0.755235	-0.757628	-0.725599	-0.829311	-0.0949321	0.522412	0.30441	-0.424406	-0.455734	-0.496754	-0.467558	-0.490987	-0.159918	-0.425456	-0.487102	-0.510172	-0.383374	-0.513745	-0.66943	-0.304199	-3.54526	0.125125	-0.398227	-1.17378
ECD_02484	23S rRNA pseudouridine(1911,1915,1917) synthase	-1.06183	-0.000981978	1.62998	-0.0395955	-0.186836	0.0905162	-0.0447722	-0.109481	0.0761926	-0.210664	0.410809	0.413185	0.44952	0.487984	0.48819	0.487351	0.512934	-0.0784372	0.260674	0.250411	0.254932	0.266514	0.176266	0.243459	0.292924	0.233365	0.267433	0.191453	-0.213375	-0.0225261	-0.333735	0.129991	0.147036	-0.00367924	0.179607	-0.0886179	-0.424313	0.0304749	0.0354776	-0.0186747	0.055398	-0.0257765	-0.115023	0.137779	0.32636	-0.260807	0.264894	0.243467
ECD_00580	citrate/succinate antiporter; citrate carrier	-0.00488945	0.158248	-0.0525078	-0.0542529	1.76689	-0.0659375	-0.0569675	-0.00173562	-0.0297509	0.0200324	0.170227	0.167413	0.106332	0.253682	0.247668	0.259799	0.27577	0.0178064	-0.00510112	-0.0185273	0.105797	-0.00182691	-0.00338409	-0.0285032	0.044126	-0.0235148	-0.0303985	0.229046	-0.0254047	0.0557068	0.137346	-0.0253928	0.178757	0.0348064	0.282079	0.08453	0.04362	0.0675093	-0.0385568	0.0802108	-0.0126115	0.0321188	-0.0710754	-0.125216	-0.98982	-0.109507	0.0256837	0.649898
ECD_03132	dehydroshikimate reductase, NAD(P)-binding	0.0599058	2.00123	1.93765	1.96115	1.01003	1.98751	1.95125	1.87955	1.75578	-0.0321031	1.3732	1.33722	1.25421	1.4189	1.4073	1.4275	1.43812	-0.0103396	1.59583	1.56935	1.5798	1.58697	1.43242	1.58366	1.5525	1.56232	1.5333	1.16194	-0.305859	0.66937	-0.33664	1.95203	1.91363	1.81296	1.86734	2.4754	0.362242	1.90425	1.86784	1.79875	1.98093	1.92813	1.71129	-3.66698	-1.8848	0.24974	1.71796	1.2984
ECD_04185	periplasmic chaperone	-0.410135	0.806727	0.728433	0.755613	2.84034	0.751784	0.761735	0.67638	0.563164	-0.0790615	1.6554	0.629702	0.528821	0.711832	0.7432	0.728769	0.774192	-0.546506	0.402206	0.398166	0.403829	0.421319	0.314442	0.389821	0.391104	0.365492	0.382616	-0.00885034	-0.120626	-0.273549	-1.0226	0.745501	1.67751	0.586743	0.663391	0.506097	-0.0827298	0.72726	0.642595	0.626595	0.777024	0.704051	0.539354	-0.251784	-2.81451	1.51521	0.546047	-1.06563
ECD_04105	anaerobic ribonucleotide reductase activating protein	0.210141	-0.118889	-0.216903	0.360837	0.373421	-0.186391	-0.0974575	0.785061	-0.14119	-0.292243	-0.52037	-0.544316	-0.167382	-0.415962	-0.386929	-0.367074	-0.119858	0.0770982	-0.386678	-0.381829	-0.408915	-0.367818	0.0727104	-0.392918	-0.230426	-0.451755	-0.438018	-0.414012	0.219905	-0.0915427	-0.00154811	-0.147698	-0.362703	0.111658	-0.050233	0.155839	-0.153832	0.142541	0.0687972	-0.482606	-0.301321	-0.399901	0.225919	-0.00561406	-0.0524829	-0.27814	2.83831	0.197004
ECD_01292	putative NADH-binding oxidoreductase	0.301964	0.272752	0.209766	0.0666387	0.409865	0.0688153	0.30304	0.0417736	-0.0127658	0.392389	0.439349	0.442457	0.407574	0.461644	0.455999	0.47046	0.478384	0.116107	0.302979	0.292493	0.302779	0.316342	0.204701	0.291345	0.644469	0.288234	0.270619	0.174487	0.342781	-0.0606918	-0.232195	0.275052	0.219612	0.222816	0.242014	0.728159	-0.235618	0.206623	0.6074	0.277886	0.25767	0.232665	0.160404	0.333291	-1.05577	1.15317	0.194847	0.426331
ECD_00463	putative uracil/xanthine transporter	0.224282	0.121643	0.172989	0.0914038	0.000780565	0.18917	0.0951969	0.367887	0.276111	0.194105	-0.0496161	-0.0788398	-0.105332	-0.0266142	-0.0116457	-0.0026851	0.0118008	0.273059	0.299288	0.293624	0.305266	0.305725	0.310314	0.291779	0.256319	0.278985	0.298205	0.0330714	0.288501	-0.393515	-0.108364	0.269535	0.0468315	0.149354	-0.102899	0.643222	-0.129703	0.119381	-0.0950223	0.00643652	-0.0604765	-0.0872737	0.464044	0.0416169	0.501132	0.54278	0.238457	0.286233
ECD_03481	UDP-galactose:(Galactosyl) LPS alpha1,2-galactosyltransferase	0.234488	-0.578434	0.606078	-0.618332	0.818303	-0.624348	0.536311	-0.672717	-0.87096	0.103249	0.773415	-0.44146	-0.533809	-0.245571	-0.251593	-0.240656	-0.263192	-0.0718699	-0.24501	-0.257904	-0.254114	-0.233229	-0.464521	-0.272141	-0.335506	-0.344506	0.687636	1.28718	-0.459083	0.0579556	-0.0745991	-0.53641	-0.547522	1.08772	-0.707964	-1.03655	-0.449902	-0.541566	-0.653435	-0.724976	-0.435642	-0.49636	-0.674982	-0.823735	-1.79695	0.561263	0.57206	0.610602
ECD_00829	hypothetical protein	0.456424	-0.451708	-0.537061	-0.505425	-0.706286	-0.484344	-0.463199	-0.514377	-0.560606	-0.459013	-0.0706653	-0.0672548	-0.130794	-0.0552181	-0.0628867	-0.0433641	-0.036469	-2.42545	-0.447904	-0.45393	-0.455419	-0.435233	-0.511222	-0.45321	-0.481814	-0.461082	1.33995	-0.559551	-1.1993	1.12658	-0.592297	-0.970074	-1.02043	-1.00453	-0.927132	-0.982722	-0.438359	-1.02047	-0.993615	-0.947084	-1.01204	-0.973333	-1.06332	-3.17629	2.72248	-0.604666	-0.737705	1.00368
ECD_02261	putative periplasmic pilin chaperone	0.00247892	-0.155338	-0.213968	-0.185422	1.01379	-0.211005	-0.161838	-0.243549	-0.328384	0.292758	0.146968	-0.196865	0.221531	-0.178879	-0.168292	-0.145685	-0.155408	0.204606	0.27339	0.254048	0.277673	0.279866	0.175666	0.230032	0.251659	0.211815	0.28107	0.0983861	0.241816	-0.487906	0.0656728	-0.109452	-0.15827	0.0519564	-0.138793	-0.103782	0.139146	-0.131769	-0.174021	0.133085	-0.0566836	-0.137425	0.0354992	0.358642	0.997907	-0.422454	0.0849269	0.195998
ECD_03348	23S rRNA m(6)A2030 methyltransferase, SAM-dependent	0.0258991	-0.191257	-0.313719	-0.0366403	-0.968792	0.149527	-0.23802	-0.255197	-0.254616	0.412578	-0.369902	-0.38607	-0.491605	-0.248519	-0.256719	-0.239354	-0.0446674	0.102042	-0.342964	-0.349688	-0.337108	-0.356979	-0.0280596	-0.368136	-0.42658	-0.412384	-0.217726	-0.325803	0.135385	0.008313	0.0434371	-0.223582	-0.325306	0.193495	0.00694896	-0.250611	0.116047	-0.298552	0.0111681	-0.34878	-0.212521	0.0534759	-0.187336	-0.0688617	-0.0800474	-0.311591	-0.364136	0.384008
ECD_02965	modulator of EnvZ/OmpR regulon	-0.117182	-0.102878	-0.210789	0.00228701	0.288867	-0.178143	2.50906	-0.193054	-0.350475	-0.259971	2.81454	-0.237978	-0.138392	-0.156649	-0.171026	-0.145782	-0.142865	0.000693559	-0.107711	-0.121343	-0.115377	-0.0995622	0.232806	-0.115208	-0.169197	-0.140851	-0.16713	0.0285715	0.169951	0.235472	0.0534263	-0.102155	-0.124716	0.00889823	-0.136157	-0.139035	0.08056	-0.113668	-0.187057	-0.0883277	-0.105835	0.0930712	0.48453	-0.137709	-0.787448	-0.184092	0.209697	-1.11635
ECD_03210	bifunctional acetylornithine aminotransferase and succinyldiaminopimelate aminotransferase	0.10203	0.384373	0.377549	0.36417	0.73228	0.928284	0.682737	2.81439	0.137651	0.107784	0.312338	0.310968	0.414142	0.389117	0.383316	0.428539	0.406985	-0.045463	0.438771	0.432227	0.440172	0.420536	0.610234	0.432772	0.375695	0.393495	0.433989	0.370958	0.287544	0.0165095	-0.226008	0.0832804	0.0182474	0.251387	0.0309972	-0.101925	-0.204725	0.0279395	0.326217	0.234912	0.129749	0.0368871	0.374465	-0.423765	-0.389865	-0.0125765	0.118277	-0.237506
ECD_01873	ferritin iron storage protein (cytoplasmic)	0.176247	-0.897153	-0.935384	-0.888407	-0.450382	-0.912102	-0.212766	-0.949779	-0.317023	-0.381634	-0.897144	-0.893723	-0.926479	-0.889039	-0.884653	-0.845731	-0.877418	0.158988	-0.863362	-0.872629	-0.861423	-0.836636	0.195467	-0.867293	-0.882571	-0.888244	-0.85389	-1.03143	0.223632	-0.59334	-0.210885	-0.889131	-0.914238	-0.900449	-0.884266	-0.98864	0.133973	-0.918418	-0.903249	-0.096906	-0.911855	-0.924038	0.647178	-0.508895	2.81317	-0.13481	-0.836626	-0.153547
ECD_01794	DUF2527 family heat-induced protein	-0.497667	-1.78432	-1.82626	-1.77743	-1.64056	-1.78962	-1.77675	-1.84339	-1.87087	0.624168	-1.43789	-1.46179	-1.4276	-1.42522	-1.38308	-1.34909	-1.38683	0.0282513	-1.81277	-1.82181	-1.80123	-1.79525	-1.81706	-1.82558	-1.04951	-1.83667	-1.80743	-1.91921	0.219124	0.327695	0.000761101	-1.81165	-1.84127	-1.83501	-0.935882	-1.49774	-0.0318561	-1.83135	-1.15817	-1.46098	-1.83893	-1.84788	-1.89546	1.55651	-0.881237	0.139083	-1.65685	-0.792824
ECD_00260	reactive chlorine stress species (RCS) resistance protein; pyridine nucleotide-dependent disulfide oxidoreductase family	0.350597	1.92763	2.22358	2.30561	1.81076	1.88639	1.88537	1.84885	1.67398	0.178549	2.26155	2.27679	2.17923	2.35012	2.34734	2.33665	2.39177	-0.354388	2.05705	2.07222	2.05259	2.08224	2.80612	2.06073	2.04792	2.02855	2.43432	1.78065	1.01915	0.282819	-0.434838	0.972294	0.917947	0.903383	0.930019	1.98762	-1.01127	0.930635	0.90951	0.8395	0.975662	0.892707	0.66839	-0.166484	0.266721	0.459079	1.21058	-0.345407
ECD_02302	nucleoside (except guanosine) transporter	-0.213588	-0.050011	2.80469	-0.0843635	-0.589761	-0.100114	-0.0746831	-0.135597	-0.0173971	-0.109774	-0.107949	-0.0835498	-0.159532	-0.0671512	-0.0607885	-0.0379098	-0.0411544	0.0772119	0.133637	0.126145	0.136019	0.147697	0.0245568	0.0951896	0.100179	0.0770826	0.130411	-0.0236402	-0.0307106	-0.141704	-0.213137	0.2101	0.115486	0.0602662	-0.062545	-0.111561	-0.619368	-0.0597245	-0.0591669	-0.0994246	-0.0491042	-0.0546838	0.0185205	-1.06774	0.667938	0.0137942	-0.220448	-0.238696
ECD_00048	putative 4Fe-4S ferredoxin-type protein	-0.14979	-0.266516	-0.305365	-0.289177	-0.948111	-0.29022	-0.280457	-0.332966	-0.501795	0.219676	0.210033	0.221895	0.152078	0.300448	0.297841	0.301838	0.318738	0.0892542	0.196081	0.200339	0.198626	0.208298	0.0966628	0.187672	0.154013	0.145994	0.179101	-0.10243	-0.355814	-0.116527	-0.045789	-0.0373056	-0.073545	-0.109075	-0.0752807	-0.241428	0.254692	-0.0467677	-0.112551	-0.136202	0.634875	-0.128138	0.957057	0.616696	-0.536949	-0.140858	-0.127597	-0.698227
ECD_02103	Zn-stimulated GTPase involved in zinc homeostasis; mutants are cadmium and EDTA sensitive; Zn(2+) binding protein	-0.661909	0.236331	0.149655	0.179442	-0.222535	0.195053	0.18623	0.153056	0.0513609	0.291698	-0.080949	-0.0905617	-0.11867	-0.0648795	-0.0643586	-0.0432155	-0.0501771	-0.45056	-0.0103781	-0.0348251	-0.0146506	-0.0476718	-0.105953	-0.0318499	-0.046297	-0.0290908	-0.0279149	-0.223346	-0.691391	0.816241	0.916643	-0.0546396	-0.0916159	-0.0993091	-0.0495451	-0.134052	-0.485233	-0.0709771	-0.0850699	-0.122439	-0.0687866	-0.0675566	-0.20359	0.747997	-0.183347	0.282011	-0.132499	-1.07761
ECD_03865	stationary phase growth adaptation protein	-0.00215801	-0.0035218	-0.082953	-0.141565	0.627445	0.728395	-0.212225	-0.0222925	-0.248739	0.0672278	-0.196593	-0.200384	-0.115271	-0.186449	-0.182473	-0.206316	-0.222642	-0.225931	-0.160403	-0.175302	-0.164446	-0.161293	-0.282271	-0.175993	-0.155442	-0.038075	-0.168443	-0.144302	-0.0389442	0.137433	0.00555316	-0.221683	-0.0696153	-0.628023	-0.504535	-0.176722	-0.123379	-0.199167	-0.298435	-0.0822164	-0.290065	0.0545116	-0.158488	-0.664076	-0.646128	-0.124317	2.80376	-0.177424
ECD_02859	putative inner membrane polysaccharide flippase	-0.10471	-0.218152	0.0688904	-0.284577	-0.343452	-0.280196	-0.269933	-0.297885	-0.439784	0.0666503	-0.0344797	0.238779	-0.104905	0.0442256	-0.0124528	0.0123544	0.15919	-0.243481	-0.220494	-0.248287	-0.224285	-0.22169	-0.136281	-0.235847	-0.275595	-0.14693	0.175038	-0.214938	-0.0281991	0.166598	0.149746	-0.0898908	0.0564517	-0.0512241	-0.162943	-0.150588	-0.0804658	0.00242793	-0.159974	-0.201912	-0.0900039	-0.181031	0.0310118	-0.0853863	0.0139452	0.0469199	0.0924744	0.220465
ECD_00429	inner membrane putative NAD(P)-binding transporter	0.101116	-0.193031	0.037629	-0.216943	0.0911986	-0.216866	-0.226247	-0.263734	-0.337117	0.15314	-0.00716064	-0.0377373	-0.0438435	2.80082	0.0342219	0.0450074	0.0640919	0.106774	-0.198347	-0.203992	-0.194447	-0.174023	-0.193783	-0.200543	-0.248115	-0.241426	-0.225944	0.859441	-0.0918107	0.1921	0.158532	-0.507175	-0.55224	0.184086	-0.542575	-0.143551	-0.167282	-0.541707	-0.026043	-0.182279	-0.51159	-0.24687	-0.466485	0.589043	0.464435	-0.0790252	0.133655	-0.171993
ECD_00687	succinyl-CoA synthetase, beta subunit	-0.0867655	0.776435	0.741473	0.749921	0.251548	0.753727	0.76515	0.688927	0.593212	-0.0390504	0.348127	0.305723	0.672254	0.387046	0.38042	0.37414	0.401358	-0.634737	0.266869	0.249758	0.255182	0.25925	0.126659	0.248053	0.294713	0.221963	0.237957	0.384249	-0.632365	-0.57657	-0.914767	0.161241	0.46881	0.135173	0.181048	0.600347	-0.857664	0.155821	0.141651	0.123405	0.198575	0.148603	0.537045	-0.701256	-1.91007	-0.588404	0.301191	-0.0840277
ECD_03238	D-ribulose-5-phosphate 3-epimerase	-1.61232	2.53224	2.46198	2.47077	1.39638	2.49504	2.48096	2.3554	2.21743	-2.86089	2.61599	2.62721	2.48085	2.72955	2.72463	2.72866	2.7709	-1.19702	2.80028	2.77788	2.78543	2.77828	2.60377	2.77746	2.75545	2.7748	2.71199	2.24358	-1.30418	-0.320336	-1.46808	2.14042	2.08648	1.92182	1.9759	1.73277	-2.19027	2.11253	2.01429	1.92186	2.19134	2.11268	1.84283	-2.35608	0.0318812	-0.793286	1.3489	0.455667
ECD_03182	putative general secretory pathway component, cryptic	-0.20576	-0.0934306	-0.160713	0.0135289	1.66273	-0.125865	-0.125499	-0.217527	-0.341739	0.214157	-0.00336798	-0.0221668	-0.103032	0.0447807	0.0374288	0.0698546	0.0648267	0.0341113	0.00822872	0.00279715	0.0124659	0.0171977	-0.008839	-0.000392321	-0.0635137	-0.0154283	-0.0922842	-0.0853094	-0.0259963	0.210174	-0.268639	-0.220253	-0.258479	-0.123668	-0.331509	0.019078	-0.107191	-0.0967466	0.236088	0.038983	-0.144155	0.0678235	-0.457873	-0.0145408	-1.63391	-0.484424	0.2782	-0.75795
ECD_00189	PDDEXK superfamily protein	0.043845	0.0434473	0.00598791	0.0193668	-0.645913	0.021978	0.0239719	0.499032	-0.196071	-0.394521	-0.0728882	-0.0604987	-0.125195	0.0109004	0.0105902	0.0228561	0.02042	-0.279725	0.332651	0.333047	0.331689	0.339614	0.55014	0.54604	0.298443	0.285354	0.319388	0.117435	0.235232	-0.35371	0.304708	0.322676	0.509001	0.992768	0.450015	0.527245	0.18875	0.318574	0.255447	2.43071	0.363254	0.232867	0.0756554	-0.124123	-1.32024	0.554768	0.496749	0.257516
ECD_01713	succinylglutamate desuccinylase	-0.113155	-0.673527	-0.710798	-0.69335	0.97179	-0.687629	-0.680413	-0.775657	-0.778158	0.0218729	-1.01324	-1.00886	-1.01603	-1.00347	-0.993721	-0.958959	-0.986122	0.863931	-1.11934	-1.12601	-1.10258	-1.08216	-1.10279	-1.12866	-1.15158	-1.13456	-1.12139	-0.543261	0.210245	-0.0485701	-0.184455	-1.29447	-1.32583	-1.30291	-1.2955	-0.735539	0.0132075	-1.31043	-1.27923	-1.35661	-1.32638	-1.3356	-1.33318	2.34698	2.57218	1.1867	-0.8718	0.332045
ECD_04152	hypothetical protein	-0.0391041	-0.172668	-0.350775	-0.308485	-0.375968	-0.328468	-0.308466	-0.39599	-0.539994	-0.131244	2.79251	-0.633801	1.81919	-0.549412	-0.514901	-0.527574	-0.499456	0.20945	-0.190519	-0.193702	-0.194973	-0.180088	-0.31221	-0.202186	-0.224606	-0.235178	-0.232026	-0.105238	0.242819	-0.500565	-0.153635	-0.721156	-0.537732	-0.0741133	-0.47672	-0.132297	-0.0976412	-0.437249	-0.483471	-0.427887	-0.689003	-0.696063	-0.999113	-0.0356701	-3.24431	0.0706378	-0.618192	-0.181518
ECD_01930	UDP-glucose 6-dehydrogenase	-0.0863516	-1.21546	-1.41409	-1.36278	-0.363554	-1.18829	-1.35575	-1.10622	-1.4615	0.36366	-1.21012	-1.21756	-1.26559	-1.20276	-1.20647	-1.16843	-1.19508	-0.0682017	-1.50578	-1.539	-1.52873	-1.50326	-1.52212	-1.52191	-1.53482	-1.53348	-1.52062	-1.31136	0.0389266	-0.0202845	0.210223	-1.44048	-1.47023	-1.35867	-1.36154	-1.4746	0.0127537	-1.4475	-1.33574	-1.48167	-1.4319	-1.26324	-1.49394	0.638411	-0.358992	0.22479	-1.23804	0.244715
ECD_00634	N-acetylglucosamine-6-phosphate deacetylase	-1.76585	2.52739	2.4834	2.49061	2.52756	2.52533	2.47901	2.40864	2.33885	-0.542651	1.70595	1.68537	1.62555	1.78593	1.77494	1.76273	1.82715	-0.419668	1.66789	1.64474	1.63889	1.644	1.53093	1.65245	1.63003	1.65612	1.63145	1.38354	-1.62982	-0.0680875	-0.870028	1.21166	1.1783	1.55565	1.20815	1.15937	-0.964919	1.18544	1.19664	1.11948	1.2304	1.18619	1.6386	-2.78348	1.66766	0.42477	2.29443	1.44214
ECD_10005	Excisionase	-0.256419	-1.73484	0.339418	-1.74313	-2.04775	-1.76056	-1.71859	-1.78663	-1.85816	-0.389504	-1.74598	-1.78959	-1.81739	-1.72716	-1.73078	-1.72258	-1.72219	0.0453398	-1.41576	-1.41917	-1.41521	0.00241593	-1.50242	-1.42187	-1.46841	-1.46997	-1.43783	-1.60331	0.66352	-0.656957	-0.129733	-1.46665	-1.47914	-1.47535	-1.42452	-1.44661	-0.282312	-1.46525	-1.46678	-1.47476	-1.44835	-1.4397	-1.56626	-0.151108	2.7846	-0.247594	-1.38445	-2.27744
ECD_01917	putrescine importer, low affinity	0.298812	-0.481467	2.66768	-0.475697	2.71166	0.258629	-0.480579	-0.530684	-0.145657	-0.0294166	-0.0706512	-0.639494	-0.440262	-0.626679	-0.632186	-0.600696	-0.611376	0.10558	-0.440158	-0.482149	-0.452808	-0.436784	-0.466249	-0.449434	-0.455549	-0.461239	-0.432607	0.348911	0.124678	0.00485596	-0.438107	-0.777469	-0.817307	-0.387909	-0.795655	-0.461091	0.14659	-0.799707	0.0421364	-0.603691	-0.772229	-0.496746	-0.154469	0.48218	1.1369	0.635999	-0.202051	-0.550537
ECD_00404	acyl-CoA thioesterase 2	0.0449395	0.476064	0.211884	0.250136	-0.391988	0.249308	0.450279	0.229047	0.14079	-0.254202	0.431581	0.141796	0.123918	0.201508	0.21448	0.229982	0.230036	0.18229	-0.0776708	-0.0835846	-0.0740295	-0.0574308	0.526612	-0.0740313	-0.126973	-0.12058	-0.105062	-0.370101	0.100799	0.188722	-0.229458	0.117752	0.0703305	0.0511757	0.0762477	-0.0249452	-0.153512	0.364374	0.802288	0.0212623	0.134724	0.0880908	0.376523	-0.121148	0.666378	-0.369663	0.422103	-0.0529243
ECD_00981	cytochrome bd-II oxidase, subunit I	0.0541974	-0.316785	-0.169901	-0.375616	2.22842	-0.33774	-0.339819	-0.420089	-0.464553	-0.151299	-0.195165	-0.180839	-0.213717	-0.105098	-0.110591	-0.136302	-0.165571	-0.0958158	-0.55736	2.78262	-0.548488	-0.551879	-0.644679	-0.560103	-0.593407	-0.579863	-0.558412	-0.507192	0.337778	0.285834	0.225051	-0.387472	-0.43337	-0.468363	-0.365736	0.174749	0.0425279	-0.207463	-0.456074	-0.20724	-0.430386	-0.416162	-0.55805	-0.34315	1.11811	0.301421	-0.209746	0.376239
ECD_01828	zinc ABC transporter periplasmic binding protein	-0.215259	-0.770841	-0.815482	-0.76188	-1.05192	-0.773264	-0.781318	-0.832797	-0.860548	-0.861562	-0.77316	-0.768875	-0.81166	-0.762028	-0.757134	-0.725892	-0.743999	0.140432	-0.662478	-0.693007	-0.66338	-0.665046	-0.684379	-0.674702	-0.675972	-0.677807	-0.657252	0.621303	0.561254	0.320271	-0.0882297	-0.586949	0.444813	-0.582512	-0.576783	0.389133	0.31403	-0.610738	-0.593578	-0.620783	-0.589341	-0.616814	-0.65443	-0.170828	-2.35958	-0.664669	-0.874103	1.31895
ECD_02957	putative membrane-bound redox modulator	0.0308	0.276912	0.369983	0.237382	0.464298	0.370667	0.201613	1.69969	0.347931	0.00208431	0.132285	0.183368	0.145323	0.222578	1.25304	0.300314	0.245359	-0.0208912	0.352116	0.338429	0.343599	0.34783	0.250748	0.3437	0.28858	0.407476	0.28539	0.0325624	0.0161465	-0.137198	0.0300098	0.538985	0.417503	0.642704	0.472382	0.582731	-0.0038146	0.423804	0.358437	0.411145	0.432655	0.44277	0.266413	-0.212196	0.498807	-0.0215647	0.196581	-0.0780906
ECD_01879	response regulator in two-component regulatory system with BarA	0.452191	-1.00443	-1.04338	-1.00692	-1.14487	-1.00837	-1.00235	-1.05508	-1.06762	-0.883316	-0.5998	-0.60238	-0.640004	-0.59932	-0.594037	-0.542487	-0.582296	-0.924407	-0.992725	-0.998688	-0.979829	-0.952497	-0.944388	-0.993495	-0.988366	-1.00871	-0.963275	-1.0772	-0.0479158	-0.31673	0.0963155	-0.770029	-0.785998	-0.741032	-0.74565	-0.787241	0.0151916	-0.797939	-0.761563	-0.78205	-0.775145	-0.784169	-0.812161	0.151772	2.77795	-1.41308	-1.21198	-1.85845
ECD_00834	putative capsid scaffolding protein	0.589612	2.3348	2.26941	2.29113	2.77517	2.33097	2.29251	2.2437	2.17485	0.2868	1.98406	1.98619	1.90974	2.02592	2.01287	2.0039	2.06382	-0.392734	1.75302	1.73367	1.74012	1.74299	1.65531	1.73521	1.72135	1.74329	1.75379	2.07665	0.283798	0.468153	0.771919	1.26762	1.20454	1.18699	1.70452	1.18285	-0.321456	1.20396	1.17548	1.21896	1.22137	1.24073	1.0856	-1.99231	-0.869393	0.533444	1.27941	1.05507
ECD_00966	DNA helicase IV	-0.161277	-0.544373	-0.608327	-0.59631	0.0691759	-0.569511	-0.560746	-0.623036	-0.392826	0.0931586	-0.422591	-0.404967	-0.466632	-0.35952	-0.363885	-0.363534	-0.381233	-0.0410151	-0.539052	-0.564084	-0.530518	-0.536875	-0.349874	-0.542133	-0.611164	-0.561277	-0.546681	-0.313068	0.0590978	-0.0846069	0.131375	-0.594277	-0.661344	-0.682401	-0.570163	-0.659756	-0.197146	-0.41864	-0.648668	-0.432247	-0.626945	-0.626529	-0.314705	-0.506834	1.61449	1.7035	-0.277628	-0.137478
ECD_02729	flavinator of succinate dehydrogenase; antitoxin of CptAB toxin-antitoxin pair	0.19968	1.35246	1.29207	1.30113	0.661528	1.34068	1.29795	1.27516	1.16771	-0.955979	0.305851	0.303672	0.264432	0.370832	0.337415	0.372476	0.362863	-0.749488	0.949603	0.93713	0.943973	0.929125	1.62958	0.942447	0.88885	0.916846	0.904675	1.02084	-0.657496	0.171771	-0.911031	0.556351	0.513115	0.436348	0.516985	0.398599	-0.197767	0.532798	0.505845	0.470387	0.571137	0.503216	0.487152	-0.888937	-0.0213914	0.136956	0.364792	0.934896
ECD_04236	OPG periplasmic biosynthetic phosphoglycerol transferases I (membrane-bound) and II (soluble)	0.0820156	2.76635	-0.107673	0.0587788	0.117804	0.034339	0.46645	0.0352774	0.141422	-0.0724624	0.13118	0.0245718	0.261597	0.112395	0.145802	0.129074	0.16644	0.0702485	0.0240459	0.0193288	0.0181955	0.0323613	-0.0591314	0.0110303	-0.00715209	-0.019556	0.0968039	0.0518888	0.0650269	0.0915281	0.104761	-0.093061	-0.0140411	-0.2232	0.248264	-0.0165597	-0.0268999	-0.107587	0.0400213	-0.0396612	-0.06099	0.233041	-0.0252882	-0.189055	-0.227679	-0.0935367	0.173991	-0.233552
ECD_01812	CopC family protein	0.0883342	-0.484891	-0.531278	-0.487135	-0.624345	-0.48754	-0.494838	-0.552012	-0.555107	-0.0133719	-0.778689	-0.776869	-0.80741	-0.777632	-0.774174	-0.738357	-0.758119	-0.299318	-0.788241	-0.798376	-0.772259	-0.759874	-0.776464	-0.790786	-0.782057	-0.799267	-0.753403	-0.873628	-0.193044	0.0752136	-0.516426	-0.981343	-1.00416	-0.917603	-0.953357	-0.963004	-0.650232	-0.99144	-0.962457	-0.968445	-1.00139	-0.987868	-0.967002	0.705776	2.76518	-0.705211	-0.739416	0.123205
ECD_01276	repressor for the divergent puu operons, putrescine inducible	0.376156	-0.0963912	-0.525019	-0.510169	-0.797856	-0.507833	-0.453753	-0.52993	-0.586483	-0.153862	-0.583532	-0.574656	-0.307642	-0.563131	-0.56863	-0.546671	-0.558059	0.420461	-0.479948	-0.486019	-0.459134	-0.460559	0.0346555	-0.470564	-0.487552	-0.497674	-0.271171	-0.62056	-0.0986137	-0.553092	0.0791792	-0.832162	-0.867364	-0.875354	-0.851449	-0.904705	0.25453	-0.552361	-0.819951	-0.806121	-0.834239	-0.837742	-0.93278	2.03266	1.9783	-0.0541838	0.532218	-0.0437495
ECD_02211	NADH:ubiquinone oxidoreductase, fused CD subunit	-0.252777	1.13702	1.06192	2.67005	0.796362	1.09874	1.1162	1.04303	1.06433	-0.686491	2.75778	0.448675	0.388653	0.470154	0.478942	0.49782	0.489212	-0.563952	0.747113	0.732994	0.761479	0.74167	0.657423	0.708745	0.751591	0.709263	0.751425	0.767158	-0.686964	0.0425259	-0.601921	0.547497	0.498671	0.499997	0.545848	0.459903	-0.726749	0.519257	0.496872	0.602964	0.516786	0.53055	0.511328	0.323998	0.835107	-0.462852	0.364674	0.760212
ECD_00828	hypothetical protein	-0.382531	-0.381851	-0.464357	-0.421815	0.305595	-0.414603	-0.391049	-0.446665	-0.490045	-0.297372	-1.03966	-1.03693	-1.09107	-1.00893	-1.03784	-1.00669	-1.02219	-0.12388	-0.585247	-0.589301	-0.576167	-0.55446	-0.620444	-0.589338	-0.614666	-0.599717	-0.566795	-0.692097	0.341156	1.07887	0.427927	-0.953337	-1.00041	-0.98767	-0.909471	-0.958407	0.191051	-1.00371	-0.969493	0.43285	-0.989252	-0.957881	0.207727	-1.44532	-2.13976	0.140826	-0.396417	-0.403865
ECD_00785	putative transporter	0.140362	0.193497	0.144926	0.209451	-0.231377	2.75672	0.200624	0.106052	0.03347	-0.166382	0.0945542	0.047504	0.0140296	0.129355	0.117984	0.124484	0.139312	0.228594	0.560029	0.552038	0.537926	0.543474	0.454872	0.55044	0.981473	0.518472	0.537728	0.359024	-0.191092	-0.33711	0.0926416	0.379124	0.123585	0.523579	0.199643	0.400841	0.0972527	0.134414	0.130885	0.347785	0.162758	0.1384	0.389792	0.290575	0.218586	1.58869	0.221064	-0.0436364
ECD_03352	arsenate reductase	0.023726	0.580883	0.457712	0.55894	2.28279	0.580068	0.528617	0.431964	0.240896	-0.103588	-0.13909	-0.142174	-0.26659	-0.0236529	-0.0288389	-0.00956057	-0.0228586	0.250224	0.192778	0.182092	0.200094	0.176872	-0.0113597	0.170182	0.112503	0.123089	1.34317	-0.186766	0.0873719	-0.414596	-0.0728508	-0.0135882	-0.0111379	-0.29304	-0.135718	-0.0980079	-0.174313	0.0164022	-0.100913	0.381114	0.0977266	-0.00837962	-0.284844	0.196455	0.334703	0.748247	0.00487393	-0.337611
ECD_01702	chito-oligosaccharide deacetylase	0.140289	-1.31709	-1.35531	-1.32444	-0.230631	-1.33272	-1.31999	-1.41643	-1.44264	0.180943	-1.57401	-1.56923	-1.57278	-1.56212	-1.54904	-1.51191	-1.55794	-0.13783	-1.68495	-1.70901	-1.6736	-1.65978	-1.70011	-1.71182	-1.74181	-1.7087	-1.31317	-1.37441	0.0443952	-0.673634	-0.0961902	-1.90937	-1.93351	-1.49969	-1.54556	-2.0324	-0.103134	-1.91907	-1.91524	-1.41127	-1.93319	-1.99688	-2.01711	1.11898	1.37106	0.83361	-1.4105	0.840378
ECD_02060	putative ABC transporter permease	-0.221646	-0.451259	-0.52831	-0.4797	-0.361134	-0.464814	-0.485336	-0.526041	0.750166	0.897019	-0.217796	-0.222477	-0.261387	-0.203701	-0.208429	-0.17915	-0.198638	-0.237329	-0.345403	-0.356644	-0.339727	-0.331568	-0.405473	-0.358931	-0.358863	-0.364736	-0.364768	-0.559271	0.32459	0.132688	-0.180881	-0.306565	-0.309831	0.648875	-0.310643	-0.357673	0.0794061	-0.297052	0.472127	0.129256	-0.261619	-0.336473	0.259535	-0.546787	2.52945	-0.31811	-0.14407	0.183056
ECD_00945	putative fimbrial-like adhesin protein	0.00382081	0.549043	0.608459	0.487317	2.75035	0.518887	0.516307	0.452628	0.405543	0.124087	0.407517	0.429225	0.372123	0.459286	0.451326	0.451171	0.461482	0.177643	0.350848	0.33532	0.352313	0.640381	0.232775	0.340916	0.310112	0.334812	0.909868	0.166621	0.0199791	-0.397841	-0.230866	0.29172	0.244262	0.22805	0.696537	1.21426	-0.244972	0.254717	0.277977	0.272552	0.256967	0.272873	0.714381	-0.189783	0.796132	-0.20908	0.382954	-0.169637
ECD_04187	minor component of type 1 fimbriae	0.0217235	-0.847312	-0.928191	-0.884126	0.393161	-0.90639	-0.881507	-0.970086	0.124827	-0.0381798	-1.3174	-1.32502	-1.42105	-1.24274	-1.20755	-1.21771	-1.19528	0.0875028	-1.30919	-1.30944	-1.31103	-1.29479	-1.42755	-1.31828	-1.3488	-1.35589	-0.800477	-1.2279	-0.285782	0.157056	-0.26643	-1.16671	-1.19135	-0.777878	-0.742832	-1.48075	-0.135588	-1.17647	-0.569157	-1.3089	-1.13393	-1.23084	-1.44172	0.25469	0.542359	-0.328059	-1.05186	0.837549
ECD_01056	biofilm regulator	0.471495	-0.17011	-0.236921	0.323003	0.435582	0.316654	-0.176135	-0.249481	-0.296371	0.107353	-0.659816	-0.646983	-0.686131	-0.635463	-0.638596	-0.616866	-0.646948	0.34891	-0.388644	-0.396109	-0.384741	-0.37998	-0.488316	-0.389348	-0.427681	-0.419769	-0.400501	-0.0827058	-0.119127	1.02618	-0.389355	0.150907	-0.590577	-0.558925	-0.550579	-0.552357	-0.182678	-0.594566	-0.563138	-0.551531	-0.578781	-0.578743	-0.613853	0.48796	-2.3488	-1.01572	-0.65117	1.12419
ECD_00975	hydrogenase 1, small subunit	0.0392253	0.588677	0.509245	0.52678	0.184496	0.567902	0.555058	0.630704	0.426113	0.0821957	1.2298	1.25904	1.21549	1.30881	1.29665	1.3025	1.30623	-0.109419	0.71755	0.68365	0.718503	0.731414	0.622932	0.706922	0.697719	0.819811	0.72412	0.932588	0.185302	0.383451	0.160906	0.533132	0.588278	0.568092	0.55983	0.453784	-0.0998099	0.467447	0.453673	0.452962	0.489093	0.503664	0.428992	-0.474692	-0.201646	0.270463	0.512535	0.571996
ECD_01843	trimethylamine N-oxide reductase system III, catalytic subunit	0.297754	1.01886	0.975974	1.00608	0.723792	1.01755	0.986724	0.951239	0.919539	-0.562257	1.24354	0.981963	0.936732	1.00384	1.00726	1.0187	1.03347	-0.685741	0.993922	0.968436	0.985105	0.997743	0.966737	0.975592	0.987078	1.11034	1.00673	0.94874	-0.464875	0.238678	0.362363	0.789786	0.764758	0.802783	0.809589	0.719786	-0.111433	0.758481	0.765227	0.738172	0.77232	0.760626	0.697204	-0.470269	-0.693511	0.205357	0.792727	0.697531
ECD_00797	glutathione ABC transporter periplasmic binding protein	0.0236425	0.332076	0.277562	0.324703	0.336605	0.443354	0.327266	0.243506	0.300645	0.435706	0.205844	0.184404	0.12851	0.247078	0.235114	0.243977	0.259245	-0.0853745	0.0618377	0.0543752	0.0503603	0.0606789	-0.035491	0.052744	0.132312	0.033998	0.0438342	0.500061	0.211818	0.0767425	-0.0868967	0.419742	0.368195	0.380962	0.698364	0.689179	-0.0628878	0.383892	0.372828	0.362303	0.408679	0.383333	0.332772	0.533067	0.216804	-0.0814046	-0.0153101	-0.155964
ECD_04010	suppressor of F exclusion of phage T7	0.137781	-0.360508	-0.44387	-0.402135	1.51468	-0.439042	-0.386264	-0.476304	-0.328181	-0.492243	-0.446774	-0.502751	-0.568177	-0.36011	-0.358367	-0.348929	-0.357744	-0.0741484	-0.255941	-0.257675	-0.0233619	-0.0331615	-0.446659	-0.294905	-0.316822	-0.326726	-0.3447	-0.813926	0.576756	-0.24954	0.100228	-0.590451	-0.563908	-1.05553	-0.887704	0.459447	-0.12026	-0.522487	-0.897417	-0.933066	-0.746256	-0.837204	-0.386625	-0.0284064	-0.975264	0.00298785	-0.024589	-1.5433
ECD_03685	diaminopimelate epimerase	-4.85953	2.26996	2.48726	2.25879	0.960408	2.20712	2.18784	2.18315	1.93884	-5.03592	1.91833	1.91572	1.87031	2.11612	2.12447	2.74425	2.14577	-5.06131	1.43025	1.40254	1.41247	1.42783	1.20798	1.39298	1.35181	1.36326	1.25204	0.673338	-4.95891	-0.482948	-6.49328	-0.000720726	-0.0484709	-0.347824	-0.0890878	-0.543065	-6.75311	-0.0525434	0.126995	-0.240493	0.0548423	-0.0283369	-0.066272	-4.84189	-0.00635336	-0.285708	2.285	0.469542
ECD_03112	putative acryloyl-CoA reductase	-0.03998	-0.468082	-0.331614	-0.514335	0.110145	-0.235903	-0.304897	-0.193797	-0.292502	0.0314986	-0.788621	-0.827324	-0.90101	-0.751681	-0.762964	-0.723516	-0.738966	0.164185	-0.446295	-0.459581	-0.446935	-0.440244	-0.595588	-0.441132	-0.349269	-0.289998	-0.512056	-0.537424	0.12426	0.0922346	0.00945884	-0.643637	-0.66875	-0.380677	-0.376857	-0.200734	-0.157157	-0.666429	-0.75262	-0.805803	-0.622239	-0.326755	-0.523819	0.0611036	0.558338	-0.0192371	-0.465884	-1.01984
ECD_03987	adi system transcriptional activator	0.0954522	-1.07161	-1.15768	-1.08996	1.43911	-1.15331	-1.09573	-1.16232	-1.28216	0.247485	-0.801978	-0.841841	-0.913971	-0.737929	-0.737433	-0.72178	-0.742343	-0.33554	-1.28104	-1.28212	-1.29709	-1.29987	-1.47156	-1.32528	-1.34232	-1.34642	-1.38318	0.730204	-0.4297	0.141332	-0.164902	-1.39812	-0.687527	-0.942921	-0.283137	-0.00999608	-0.188802	-1.37072	-1.44822	-0.283673	-1.30464	-0.706434	-0.856259	-0.670321	-5.17487	-0.509076	-1.53755	-0.573471
ECD_00159	deoxyguanosine triphosphate triphosphohydrolase	-0.115167	0.0363273	-0.00221204	0.0132586	-0.0648382	0.241249	0.0211034	0.516714	0.291589	-0.0886549	0.186088	2.73501	0.133205	0.270461	0.914097	0.281405	0.280746	-0.112242	0.349592	0.263937	0.262153	0.27229	0.200432	0.251151	0.214747	0.248286	0.252754	0.133593	-0.406983	0.0616851	0.0827779	0.583887	0.399206	0.547665	0.39351	0.867227	0.322169	0.427329	0.400743	0.438834	0.517265	0.343431	0.615971	-0.220222	-0.465505	0.30882	0.397714	-0.0906017
ECD_04257	2-deoxyribose-5-phosphate aldolase, NAD(P)-linked	0.258728	-0.28468	-0.364712	-0.322399	-1.01076	-0.254184	-0.322398	-0.409928	-0.367069	0.0731332	-0.630396	-0.638231	-0.73635	-0.553146	-0.518848	-0.532318	-0.502382	-0.00732516	-0.374426	-0.378277	-0.379512	-0.364947	0.187621	-0.386681	-0.216605	-0.418635	-0.415368	-0.375096	0.0306807	0.203897	-0.0148837	-0.690534	-0.716618	-0.384954	-0.800204	-0.572807	-0.189664	-0.702802	-0.589903	-0.400285	-0.65813	-0.755055	-0.620266	-0.0075264	0.0143084	0.0650897	-0.538204	-0.141772
ECD_00636	N-acetyl glucosamine specific PTS enzyme IIC, IIB, and IIA components	0.137056	-0.366162	-0.248784	0.907476	-0.539521	-0.27948	-0.379296	-0.181489	-0.28986	0.10578	-0.337938	-0.347458	-0.396157	-0.274013	-0.272721	-0.262669	-0.251607	-0.0744927	-0.648388	-0.675587	-0.676523	-0.658393	-0.774558	-0.619653	-0.716139	-0.575957	-0.547575	-0.45714	-0.13806	0.0453378	0.00913381	-0.633734	-0.612163	-0.461108	-0.359386	-0.297793	0.0784989	-0.599493	-0.594905	-0.658445	-0.574512	-0.615544	-0.238658	0.391013	0.151099	0.308722	-0.213361	-0.343527
ECD_02832	putative type II secretion protein GspJ	-0.622902	-0.335647	-0.452382	-0.396346	-0.913988	-0.401078	-0.366857	-0.413728	-0.514159	-0.464405	-0.0823379	-0.0603478	-0.12363	-0.0120578	-0.0280715	0.00547719	0.000481364	0.423372	0.0269717	0.00615303	0.0369061	0.0389849	-0.0309788	0.0213374	0.0171032	-0.00861097	0.0173959	-0.210128	0.328062	-1.05214	0.967994	0.479241	0.417465	0.366455	0.44267	2.72651	-0.071684	0.424517	0.435939	0.410893	0.474972	0.418965	0.306963	0.84625	2.21827	-2.05698	-0.095708	0.086738
ECD_03943	nitrite reductase, formate-dependent, penta-heme cytochrome c	0.0209518	0.187161	-0.043673	-0.0191153	0.228479	-0.070008	0.0662085	-0.145327	0.136825	0.216355	0.28382	0.599375	2.72538	0.210303	0.204675	0.20883	0.188464	-0.0400329	-0.0704693	0.0201583	-0.072867	-0.0074206	0.0180264	-0.0946674	-0.0924179	-0.132439	0.0947391	-0.339431	0.165292	0.140797	0.272835	-0.0191341	0.134959	0.0243205	0.185406	-0.200589	0.314372	-0.0405784	-0.142635	0.0485083	0.0224648	-0.0271572	-0.237094	0.253436	-0.274578	0.309738	0.19906	-0.456434
ECD_01176	dhaKLM operon transcription activator	-0.181906	-1.09558	-0.651468	-1.19753	-1.13335	-0.982504	-1.08153	-1.20134	-1.22134	-0.140489	-0.947521	-0.906179	-0.956545	-0.902776	-0.906578	-0.903311	-0.920201	-0.159939	-1.19344	-1.19372	-1.18444	-1.17612	-1.27452	-1.19368	-1.21644	-1.22158	-1.20272	-1.27719	-0.130738	-0.141921	0.0155691	-1.32915	-1.37136	-1.36907	-1.33855	-1.35096	0.138119	-1.35824	-1.32372	-1.30007	-1.36513	-1.34821	-0.343665	-0.365716	0.767019	-0.131777	-1.12798	-1.05636
ECD_02679	methyl-directed mismatch repair protein	0.00763832	-0.371593	1.21501	-0.407327	1.1912	-0.374457	1.17979	-0.431202	2.49579	0.0699656	-0.252013	-0.474523	0.991242	-0.41665	-0.437643	-0.397209	0.34172	0.00490061	0.7147	-0.561682	-0.565161	0.740977	-0.449686	-0.56104	-0.616936	-0.592407	-0.390389	-0.068923	0.0129767	0.0818004	-0.125879	-0.163457	-0.430366	-0.232364	-0.313509	-0.256057	-0.130838	-0.537697	-0.17247	-0.0741184	0.514031	-0.561626	1.02631	-0.112568	-0.166796	1.01722	2.71869	0.875042
ECD_02339	putative ethanol utilization carboxysome structural protein	0.0482561	0.497153	0.421791	0.466835	0.170118	0.440624	0.464098	0.398829	0.484048	0.315224	0.537771	0.565931	0.479221	0.596627	0.592823	1.93551	0.624591	-0.0629821	0.288566	0.280074	0.283141	0.294734	0.505957	0.263063	0.447419	0.2557	0.299117	0.129536	-0.0952004	-0.189702	0.0313966	0.15794	0.139439	0.195746	0.27754	0.258888	0.0310186	0.155376	0.130616	0.187289	0.164383	0.32238	0.127008	-0.0964842	0.506852	0.206545	0.41777	0.696646
ECD_02068	putative outer membrane protein	-0.0427694	-0.425537	-0.510096	-0.453732	-0.842594	-0.45318	-0.19431	-0.500107	-0.339395	0.0709132	-0.314465	-0.320416	-0.352067	-0.299435	-0.300107	-0.27404	-0.298419	0.219588	-0.0616672	-0.100754	-0.0590115	-0.0762034	-0.137964	-0.102529	-0.0957128	-0.0919098	0.130852	-0.284744	-0.195946	0.183187	0.13514	-0.443741	-0.452418	0.355334	-0.427806	-0.485452	-0.0078287	-0.405973	-0.454324	2.71685	-0.407278	-0.47049	0.600616	0.150677	0.00697359	-0.620047	-0.0188988	-0.225434
ECD_00003	homoserine kinase	-0.28323	-0.295884	-0.335052	-0.318215	0.0186758	-0.320098	0.349481	-0.361407	-0.293525	0.427356	-0.258725	-0.246448	-0.312201	-0.173426	-0.174249	-0.163774	-0.161824	-0.254772	-0.506556	-0.497213	-0.499445	-0.487416	-0.599996	-0.510496	-0.558292	-0.148693	-0.369353	-0.805509	-0.279418	0.0299226	-0.151514	-0.358969	-0.380072	-0.659031	-0.631577	0.0210083	-0.00215685	-0.583466	0.0947244	-0.407722	-0.544512	-0.0110006	-0.587608	-0.126067	0.631087	-0.0419492	0.303462	-0.482766
ECD_03733	transcription antitermination protein	-0.0318839	0.780877	0.54082	0.754022	-0.225275	0.57113	0.548591	0.559406	0.633448	-0.226089	0.109027	0.106673	0.0425554	0.224361	0.23604	0.233427	0.251267	-0.0692318	0.208296	0.18333	0.202417	0.214229	0.131546	0.189309	0.105869	0.126021	0.0464536	-0.258345	-0.271545	-0.0628	-0.275846	0.292189	0.0875816	0.0994506	0.0304614	0.21961	-0.16227	-0.0239217	0.49311	0.201887	0.0765148	0.164991	0.0351576	0.421754	-0.46296	1.40927	-0.0578221	0.130538
ECD_02296	putative enzyme IIC component of PTS	-0.109177	0.681029	2.70668	0.646534	0.965639	0.765803	0.876998	0.596925	0.504095	-0.142519	2.03499	0.623795	0.531459	0.640457	0.64535	0.654579	0.672157	0.405173	0.596066	0.588014	0.598034	0.601509	0.494952	0.569465	0.818722	0.560709	0.663985	0.522508	0.211706	0.0861405	0.180863	0.498483	0.44856	0.639868	0.487894	0.966639	0.117745	0.45924	0.500523	0.641322	0.464537	0.459276	0.52976	0.159731	0.236263	0.192164	0.531388	0.868218
ECD_00788	DUF1479 family protein	-0.0215367	-0.871583	-0.922512	-0.853016	-1.29501	-0.886746	-0.854675	-0.952157	-0.738088	0.243563	-0.807581	-0.854286	-0.884341	-0.776882	-0.786788	-0.774952	-0.772272	0.0913226	-0.926788	-0.927015	-0.942003	-0.932872	-0.567689	-0.929557	-0.99209	-0.973791	-0.956469	-0.771705	-0.0321374	0.487669	-0.203623	-0.67347	-1.23235	-1.27885	-0.94285	-0.775443	-0.149985	-1.21787	-0.391334	2.70207	-1.19684	-1.22149	-0.866224	0.341511	0.209216	0.185081	-0.805277	0.499113
ECD_02180	undecaprenyl phosphate-L-Ara4FN transferase	0.0526486	-0.51268	-0.682024	-0.636397	-0.969539	-0.652606	-0.608363	-0.659221	-0.437553	-0.0830243	-0.74904	-0.551402	-0.783472	-0.714094	-0.719362	-0.690133	-0.712203	0.4334	-0.727117	-0.737324	-0.722459	-0.747011	-0.473225	-0.746189	-0.475082	-0.75601	-0.668086	-0.494085	0.230446	0.0617112	-0.0118812	-0.947002	-0.969616	-0.984789	-0.553327	0.0613802	0.201173	-0.951032	-1.02821	-0.989931	-0.740968	-0.95563	-0.171536	1.58946	0.921102	-0.0163649	-0.45372	0.877244
ECD_02404	BamABCDE complex OM biogenesis lipoprotein	-1.06935	2.5188	2.4477	2.4617	1.88583	2.51085	2.42158	2.37726	2.31151	-0.209894	2.55883	2.56642	2.50459	2.6271	2.62139	2.59006	2.6933	-1.46209	1.65552	1.6392	1.64954	1.66111	1.53972	1.62917	1.65106	1.63058	1.6736	1.44649	-1.80649	0.615747	-1.36518	1.04123	1.00569	0.988566	1.02894	0.923364	-0.608846	1.01295	1.9926	0.959761	1.03523	0.946854	0.870411	-0.978056	-0.939551	1.37069	1.80182	0.456264
ECD_00893	leucine-responsive global transcriptional regulator	0.0493898	-0.257724	-0.337806	-0.538982	-0.576486	-0.518105	-0.516533	-0.57016	-0.636009	0.509931	-0.180833	-0.16522	-0.220634	-0.14604	-0.151868	-0.138206	-0.144675	-0.00413579	-0.830768	-0.834296	-0.822195	-0.803186	-0.900757	-0.83391	-0.853734	-0.853336	-0.713527	-0.868113	0.232049	0.20418	-0.243971	-0.253452	-0.30426	-0.112783	-0.235844	-0.297309	0.120402	0.148657	-0.325676	-0.287589	-0.292564	-0.318811	-0.418688	0.517069	0.425883	0.223472	-0.401829	0.801778
ECD_02225	phosphodiesterase activity on bis-pNPP	-0.142662	-0.331308	-0.427884	-0.359162	-0.173455	-0.375834	0.0720806	-0.41512	-0.333628	0.156043	-0.0342639	2.35935	0.185384	0.00403062	0.00404995	0.0302648	0.0218342	0.123546	-0.125732	-0.132002	-0.114482	-0.114485	-0.19869	-0.161574	-0.132245	-0.157822	-0.115804	-0.152999	0.0232799	-0.138984	-0.100224	0.142839	0.10309	0.175353	0.431537	0.0742754	0.0849165	0.125531	0.267773	0.102315	0.119929	0.127392	0.170738	0.41859	1.27382	-0.481559	-0.0518031	0.299167
ECD_03695	Magnesium and cobalt transport protein corA	0.248277	0.305446	0.187031	0.284247	-0.811713	0.210969	1.82366	0.223704	0.0279463	1.3195	1.38831	1.38588	1.3442	1.55991	1.55072	1.54557	1.58671	0.039418	0.396842	0.384617	0.396338	0.416242	2.29201	0.368567	0.348252	0.335193	0.253085	1.61248	0.695967	-0.743943	1.47221	0.658794	0.61801	0.372142	0.494678	0.218016	0.511572	0.611048	0.555188	0.462133	0.713026	2.6843	0.523921	-0.648779	1.74247	0.17114	0.246445	-1.66913
ECD_03714	hypothetical protein	0.0603644	0.123678	0.287009	0.394983	0.331435	0.0336501	0.170121	0.0277472	-0.177549	0.1928	0.064247	0.225393	0.494472	0.240042	0.212904	0.2172	0.230597	0.0836447	0.0680834	0.0441271	0.0559878	0.0643834	0.740474	0.247726	0.0290104	0.130947	-0.0923582	-0.0707178	-0.0400171	-0.13445	0.0701654	0.0210612	0.0330081	0.0526716	0.062759	0.0791421	0.15113	-0.0404126	-0.028308	0.149391	0.139882	-0.0662749	-0.00923918	0.444074	-0.758743	0.0533448	1.98467	-0.526958
ECD_04276	inner membrane protein	-0.160674	0.192054	0.184763	0.152245	-0.494236	0.270677	0.146271	0.33048	0.0255274	-0.0426639	0.85766	0.828046	0.499438	0.699941	0.775261	0.705845	0.762944	-0.0314101	0.666575	0.656486	0.655902	0.667595	0.536695	0.648834	0.645763	0.62676	0.749341	0.440023	0.275763	-0.0195125	0.288806	0.547803	0.516277	0.491647	0.632604	0.512547	-0.0749487	0.641523	0.416285	0.387525	0.578801	0.482007	0.40402	-0.343553	0.0466201	0.573272	0.565944	0.886615
ECD_03464	tRNA Leu mC34,mU34 2'-O-methyltransferase, SAM-dependent	0.25791	-1.05472	-0.41706	-1.08788	-0.125368	-1.09704	-1.05787	-0.175514	-1.3735	-1.00364	-1.78357	-0.192165	-1.82613	-1.58372	-1.58516	-1.57541	-0.869175	0.198951	-1.56708	-1.57819	-1.57652	-1.56173	-1.19158	-0.520531	-1.72344	-0.787741	-1.79502	-0.797671	-0.319264	0.158296	-0.229487	-0.771751	-1.98809	-2.30314	-1.5301	-1.83944	-0.0583396	-1.97007	-2.11267	-2.19155	-1.85684	-1.9811	-0.528893	0.368743	-3.01117	-1.24551	-0.654243	-0.935009
ECD_01912	DNA gyrase inhibitor	-0.0192412	0.158305	0.123146	0.162059	-0.160233	0.160436	1.03337	0.0966597	0.0446649	-1.22144	-0.441657	-0.437802	-0.47473	-0.422751	-0.427734	-0.395765	-0.417826	0.755561	0.0964258	0.0529867	0.0825018	0.0978499	0.0770938	0.0858798	0.614197	0.0763438	0.105338	-0.0737021	0.606761	-0.153747	-0.0509224	-0.717052	-0.754735	0.219653	-0.737562	-0.752093	0.0661633	-0.735583	-0.754039	-0.123747	-0.703934	-0.777778	-0.844188	-1.67327	-1.98985	-0.710744	-0.306782	-1.27843
ECD_01478	altronate oxidoreductase, NAD-dependent	-1.38943	-0.0666881	-0.0825784	-0.0190702	-0.344694	-0.0818918	-0.0503992	-0.128287	-0.158453	-1.9249	0.87514	0.873866	0.845292	0.900807	0.903582	0.912362	0.913784	0.800555	0.834853	0.840232	0.850625	0.847567	0.753085	0.839062	0.84785	0.820666	0.864708	0.731324	0.566272	-0.0979288	-0.469178	1.30725	0.600999	0.603942	0.639118	0.532093	-0.245582	0.604758	0.640806	0.589785	0.638356	0.582468	0.54587	-2.91475	-0.987429	-0.477668	0.0360399	-0.586784
ECD_04263	SMP_2 family putative membrane-anchored periplasmic protein	-0.0426315	-0.285396	-0.364586	-0.323935	-1.2473	0.0427219	0.231011	-0.41304	0.28476	-0.0280422	-0.180752	-0.188697	-0.287907	-0.102217	-0.0683862	-0.083547	-0.0497552	-0.0629902	-0.292299	-0.296237	-0.297453	-0.282925	0.0313375	-0.30463	-0.324962	-0.336442	-0.333141	0.218062	0.378941	-0.606328	-0.0301894	0.250751	0.177541	0.17118	0.0397834	0.246316	0.280781	0.12649	0.018125	-0.0104449	0.176692	0.0799414	-0.134984	-0.0527329	-1.45428	0.00348071	0.0882911	-0.408079
ECD_01953	colanic biosynthesis UDP-glucose lipid carrier transferase	-0.209525	0.66805	0.614216	0.654844	1.77268	0.660412	0.646567	0.6023	0.545839	-0.00423987	0.888131	0.882711	0.826962	0.926001	0.916688	0.927236	0.937978	-0.817244	0.301161	0.272945	0.300679	0.313456	0.750182	0.294187	0.283097	0.277351	0.467423	0.154555	0.468375	0.531446	0.202302	0.851024	0.828342	0.809222	0.844452	2.66776	-0.17059	0.843534	0.780596	0.768473	0.874887	0.786035	0.726783	-0.774078	1.16632	0.193796	0.780495	0.857037
ECD_03301	sn-glycerol-3-phosphate ABC transporter permease	-0.0695274	0.466987	0.255807	0.329375	0.577697	0.336363	0.441382	0.196546	0.547327	-0.144538	0.38087	0.122127	0.203428	0.225087	0.218826	0.23099	0.228368	0.0255985	0.443453	0.430126	0.442035	0.41786	0.60954	0.400028	0.365559	0.53982	0.313251	0.278731	0.00123948	-0.0187683	0.00295761	0.55568	0.227055	0.677501	0.10863	0.212556	0.014399	0.135506	-0.0307058	-0.0291525	0.185479	0.239676	0.178151	-0.301345	-0.224739	-0.344653	0.100878	-0.102843
ECD_02342	reactivating factor for ethanolamine ammonia lyase	0.363695	-0.274277	-0.0817012	-0.302431	-0.50247	-0.333389	-0.295741	-0.368	-0.197152	-0.267771	-0.642172	-0.391526	-0.455325	-0.901362	-0.897852	-0.872035	-0.887407	0.361046	-0.496552	-0.500507	-0.493213	-0.476067	-0.566197	-0.514923	-0.525869	-0.535379	-0.49345	-0.659374	-0.12279	0.164124	-0.106275	-0.747741	-0.780496	-0.283247	-0.272067	-0.837983	0.169216	-0.762795	-0.206622	-0.298019	-0.757281	-0.810647	0.496188	0.501315	0.481198	0.0288642	-0.381404	0.609313
ECD_01030	glyoxylate/hydroxypyruvate reductase A	1.08335	2.35657	2.29482	2.287	1.99508	2.34827	2.29545	2.24567	2.18498	0.0661574	0.500682	0.513658	0.460389	0.531518	0.523169	0.536828	0.533457	-0.159034	1.07839	1.04899	1.07795	1.07376	0.971671	1.06639	1.06501	1.06398	1.08533	0.963373	0.487508	0.682546	0.0736934	1.21045	1.18379	1.2217	1.23548	1.21352	-0.86778	1.15395	1.17404	1.19721	1.19822	1.19711	1.1113	-2.0703	0.455019	1.3332	2.66532	1.67993
ECD_00831	retron EC86 RNA-directed DNA polymerase-like protein	0.159355	-0.469805	-0.555162	-0.512262	-0.0595803	-0.501356	-0.481274	-0.532458	-0.60904	0.0365591	-0.526375	-0.530401	-0.584828	-0.51586	-0.520184	-0.491762	-0.503798	0.720981	-0.225398	-0.250674	-0.241394	-0.226553	0.891052	-0.232121	-0.286297	-0.244882	-0.227578	0.367172	-1.17875	-0.778883	0.119354	0.105715	0.0471584	0.0210906	0.132388	0.0226239	0.929075	0.0435629	0.0359617	0.0751033	0.0620017	0.0771889	-0.0679204	-2.58889	1.38932	0.660613	-0.415047	-1.52278
ECD_03985	lipid A phosphoethanolamine transferase	-0.249998	-0.416389	-0.564288	-0.60304	-0.58158	-0.570265	-0.090469	-0.225115	-0.446424	0.172057	-0.513103	-0.350814	-0.557408	-0.486041	-0.486577	-0.474914	-0.489227	0.105738	-0.655739	-0.660404	-0.676709	-0.554792	-0.600126	-0.70483	-0.581282	-0.621785	-0.624041	-0.43855	0.102532	0.0960857	0.0963535	-0.469833	-0.819596	-0.556945	-0.363411	-0.16113	0.117912	-0.614767	-0.315231	-0.121133	-0.702813	-0.606291	-0.62468	0.100338	0.0397167	-0.332553	0.894697	0.37042
ECD_03530	hypothetical protein	0.288996	0.136752	-0.0536425	0.106191	-1.11421	0.0798583	0.121635	0.0357061	-0.155598	-0.440869	0.120385	0.146689	2.66141	0.350899	0.368629	0.364184	0.359324	-0.534826	0.445967	0.443091	0.43656	0.464675	0.258026	0.423538	0.384725	0.355274	2.03293	-0.285856	-0.641788	0.28358	0.158289	0.829185	0.802473	0.572626	0.659775	0.340097	1.21643	0.817636	0.691554	0.634277	0.907861	0.85785	2.06697	0.938475	1.00237	0.22281	-0.0124296	0.960837
ECD_02728	toxin of CptAB toxin-antitoxin pair	0.6132	0.271313	0.54485	0.229369	0.246122	0.258803	0.236882	0.201939	0.329061	0.0139002	2.66063	0.25032	-0.345905	-0.242066	1.31722	-0.238193	-0.251728	-0.0549284	-0.115711	-0.125699	-0.116613	-0.0182164	-0.0709541	-0.117416	-0.186035	-0.0556098	-0.163892	-0.283084	-0.141109	0.0406708	0.103214	-0.407168	-0.447308	-0.425853	-0.142586	0.155328	-0.108481	-0.31092	-0.220565	-0.381055	-0.391582	-0.459832	-0.238457	0.599114	-0.709586	0.0643015	-0.194185	-0.625614
ECD_01673	3-deoxy-D-arabino-heptulosonate-7-phosphate synthase, tryptophan repressible	-0.00814868	-0.185838	1.46266	-0.187175	-0.300251	-0.165802	-0.194099	-0.274401	-0.277537	-0.19037	0.449206	0.462454	0.423489	0.481178	0.475154	0.485271	0.525437	-0.506049	-0.466052	-0.468111	-0.451608	-0.432131	-0.499658	-0.47036	-0.481907	-0.474736	-0.459242	-0.53618	-1.17562	-0.76655	0.07295	0.187961	0.165887	0.17229	0.174168	1.74852	-0.991392	0.133965	0.190181	0.158161	0.187393	0.125817	0.158687	-2.21351	-0.114092	0.648779	0.772249	0.332539
ECD_00397	putative ABC transporter periplasmic binding protein	-0.0871278	0.00700318	-0.034653	0.0804317	0.00770761	0.0513049	0.139897	-0.0667537	-0.0269288	0.0517776	0.0169232	0.186325	-0.0354723	0.0617369	0.069727	0.0779481	0.0820188	0.0285171	1.41528e-06	0.00139486	0.00078364	0.0190986	0.028181	-0.00843709	-0.0498243	-0.0327706	0.0375118	0.0490504	0.170421	-0.102562	0.0153095	0.304198	-0.15108	-0.180202	0.147022	0.111227	0.0719233	-0.0140927	-0.152128	0.258892	-0.0824593	-0.137871	0.334353	0.0611775	-0.0276794	-0.573865	0.270971	0.929143
ECD_00268	betaine aldehyde dehydrogenase, NAD-dependent	0.229291	0.0684458	2.4575	0.0430114	0.239049	0.0275992	0.0475588	-0.0122455	0.58542	0.0751685	0.0066393	0.0127183	-0.0465693	0.0761926	0.0791507	0.0912876	0.105094	0.359242	0.408477	0.420301	0.411401	0.530336	0.471324	0.417481	0.379698	0.375241	0.469343	0.655665	-0.27848	-0.120364	0.116902	0.0341606	-0.0434078	-0.0331465	-0.0128937	-0.178222	0.134025	0.000262324	-0.0280266	0.262848	0.0352076	-0.0117032	0.489866	0.0416829	-0.068181	0.1629	0.0210479	-0.728389
ECD_02787	periplasmic L-asparaginase 2	-0.0261586	0.703586	0.724716	2.12222	0.600308	0.581532	0.598023	0.568946	0.517111	0.0168629	0.625951	0.75067	0.563617	0.720033	0.672241	0.712113	0.725132	0.179229	0.718771	0.760369	0.718905	0.729641	0.6287	0.709261	0.681769	0.685693	0.845528	0.461039	-0.183217	-0.0534758	-0.142079	0.528376	0.476749	0.556836	0.533525	0.354882	0.0474368	0.488614	0.848712	0.796181	0.543452	0.462376	0.747873	-0.386894	-0.6855	-0.236273	0.481422	0.206271
ECD_03835	putative enzyme IIB component of PTS	-0.0254683	-0.00823806	0.0532247	-0.0201311	-0.197468	0.0410874	0.0662085	0.377402	-0.199139	-0.0137468	-0.104448	0.00777042	0.183651	0.000920139	0.00379498	-0.000897626	-0.0122636	0.00828579	0.172306	0.133035	0.257613	0.157212	0.0625251	0.133393	0.0975139	0.0729434	0.0419985	-0.0730505	-0.0251857	0.140412	0.303023	0.0504676	0.145873	-0.0270505	-0.1386	0.151746	0.0962082	-0.0615106	0.101276	-0.225124	0.0165391	0.0733563	0.450252	-0.0582434	-0.77948	0.313262	0.103259	-0.467657
ECD_02753	oxidative stress defense protein	0.0601709	0.605855	0.752635	0.554168	0.147737	0.573959	0.566562	0.710649	0.655415	0.11582	0.491921	0.483211	0.435919	0.559653	0.52833	0.560709	0.564739	0.0856452	0.505845	0.489477	0.499349	0.501587	0.707912	0.502679	0.451637	0.466603	0.501482	0.367193	-0.143729	0.0740551	-0.294726	0.462166	0.5498	0.511595	0.469008	0.574801	-0.189544	0.5592	0.556364	0.820265	0.601879	0.414884	0.333248	-0.0597187	-1.89292	0.0174838	0.553771	0.0385814
ECD_03659	thioredoxin 1	-0.601287	1.87131	1.74108	1.82312	0.67495	1.8073	1.78342	1.77622	1.57453	-0.352916	1.86467	1.83429	1.80177	2.0807	2.07383	2.04225	2.08922	-0.37882	1.91329	1.88957	1.907	1.92346	2.65207	1.88006	1.86785	1.84614	2.52052	1.2138	-2.85082	0.574782	0.619029	1.56285	1.52042	1.25841	1.3999	1.09972	0.435913	1.51133	1.44313	1.36828	1.64166	1.56687	1.42878	-3.21557	2.46343	-0.0939946	1.23586	1.3511
ECD_00725	acyl-CoA thioesterase, lipoprotein	0.0780465	-0.394132	1.19805	-0.482066	-0.423266	-0.377873	1.19603	1.08049	-0.548212	0.0624183	-0.0178003	-0.226469	-0.262733	-0.14633	-0.15188	-0.160332	-0.135054	0.0821209	-0.451079	-0.325347	-0.463198	-0.367149	-0.415325	-0.462994	-0.512539	-0.508002	-0.304888	-0.452513	0.290701	0.0540182	-0.158348	-0.507029	-0.33016	-0.641572	-0.468454	-0.103782	-0.0311866	0.403135	-0.538443	-0.497636	-0.560164	-0.518431	-0.567083	-0.0205684	0.795182	0.406692	-0.493794	0.112778
ECD_03180	putative general secretory pathway component, cryptic	0.428465	0.598687	0.535447	0.563181	0.071756	0.576276	0.563652	0.473235	0.759862	0.0281347	0.563359	0.539443	0.455195	0.612909	0.604261	0.629543	0.635755	-0.245894	0.314146	0.308753	0.318477	0.318075	0.111023	0.305089	0.243426	1.30741	0.203777	1.01772	-0.0766536	0.309846	0.132498	0.582975	0.665576	1.16894	0.0652073	0.27451	-0.0450259	0.11925	0.0856552	0.0315202	0.234155	0.128694	0.435686	0.53073	-0.548277	0.53274	1.09613	0.305111
ECD_00879	putative transporter	-0.0840389	-0.0956657	-0.160607	-0.12866	-0.212815	-0.110295	-0.110981	-0.174454	0.201576	0.194838	-0.27323	-0.264265	-0.311221	-0.246845	-0.252406	-0.237425	-0.239905	-0.135887	-0.2139	-0.246972	-0.236488	-0.220029	-0.152722	-0.248107	-0.252733	-0.232882	-0.239036	0.23082	0.275993	-0.526279	0.209342	-0.160425	-0.201189	-0.240923	-0.137377	-0.196928	0.270863	-0.199636	-0.219327	-0.197474	-0.196996	-0.196238	-0.301771	-0.389089	-1.97224	0.71334	-0.341754	0.786306
ECD_03697	PRK11371 family inner membrane protein	0.13939	-0.707628	0.521865	-0.738067	-0.928294	-0.803605	-0.774177	-0.790586	-0.0993607	0.0759622	0.485261	-0.495539	-0.521987	-0.31457	-0.326499	-0.312072	-0.299471	0.0175539	-0.631475	-0.643699	-0.630013	-0.616275	-0.792977	-0.663565	-0.683435	-0.696602	0.312664	-1.27162	-0.377021	0.0533003	0.24016	-0.289139	-0.326845	0.0468444	-0.448078	-0.728979	-0.0424517	0.385385	-0.384254	0.286393	-0.234853	-0.282621	-0.430582	-0.287781	0.194714	-0.196984	-0.736069	-0.641639
ECD_03457	uncharacterized protein	0.0400233	-0.0580021	-0.36954	-0.420069	-1.3184	-0.20262	-0.395868	-0.510737	-0.587452	0.251654	-0.534382	0.154071	-0.342468	-0.341636	-0.345602	-0.335029	-0.334424	-0.0957352	-0.420721	-0.433062	-0.429001	-0.424277	-0.677824	-0.470721	-0.594035	-0.522741	-0.657414	-0.536817	-0.153846	0.124882	-0.107973	-0.0740886	-0.783775	-0.242614	-0.17503	-0.675134	-0.221387	-0.763331	0.0279572	0.0815257	-0.654949	-0.779249	-0.733582	-0.141579	-0.0661835	0.0522479	-0.624159	-0.109842
ECD_03571	DUF1375 family outer membrane protein	0.0603815	1.16126	1.00226	1.14883	-0.0766457	1.10621	1.09652	2.63866	0.874754	-0.263689	0.893131	0.903784	0.82982	1.09956	1.0987	1.11315	1.12633	-0.00538216	0.657243	0.645977	0.652537	0.674227	0.46758	0.621324	0.608935	0.581851	0.471468	-0.0818574	-2.145	0.407192	-3.50282	1.19649	1.17807	0.919787	1.0351	0.705293	-1.42086	1.17463	1.08446	1.01123	1.30507	1.22171	1.06791	0.731388	-2.98841	-1.66792	0.921103	-0.990559
ECD_02930	transcriptional activator of ttdABT	-0.556783	-1.07591	0.208635	-1.13024	-0.853204	-1.14428	-1.15447	-1.14855	-0.900321	0.352278	-0.726264	-0.727133	-0.818068	-0.684773	-0.691374	-0.11733	-0.694008	0.363732	-0.492062	-0.500144	0.263048	-0.485662	-0.642798	-0.502193	1.94054	-0.525291	-0.41836	1.06096	0.569774	-0.131009	0.0292056	-0.945551	-0.993635	-1.11718	-1.02789	-1.22232	0.126579	-0.963152	-1.04012	-1.05693	-0.967943	-1.05246	0.247022	-0.0947732	0.882085	-0.802845	-1.17532	2.63625
ECD_02875	putative hydrolase	0.132595	0.503936	0.375776	2.20899	0.810031	0.347543	0.338148	0.457674	2.63613	0.0900537	0.722793	0.332225	0.489279	0.445918	0.40261	0.408216	0.434139	-0.0458752	0.406247	0.392181	0.59203	0.416648	0.34965	0.509259	0.359754	0.371457	0.339731	0.302998	0.310376	-0.0438698	0.0152519	0.489187	0.327226	0.618205	0.232953	0.130703	-0.0148389	0.255368	0.223519	0.612857	0.31021	0.209752	0.4473	-0.0356035	-0.46257	0.392711	0.707703	-0.157527
ECD_01562	putative dethiobiotin synthetase	0.300977	-1.29497	-1.32265	-1.2466	-1.5787	-1.3291	-1.27998	-1.34983	-0.439496	0.3562	-1.41557	-1.41555	-1.4314	-1.40539	-1.39303	-1.36837	-1.41255	0.43293	-1.84112	-1.83905	-1.00392	-1.81096	-1.91526	-1.84184	-1.86963	-1.86458	-1.83827	-1.95667	-0.218073	-0.429362	0.744301	-1.0883	-1.15999	-1.14847	-1.14271	-1.21693	0.480393	-1.11855	-1.12337	-1.13654	-1.12346	0.0148754	-1.20983	0.890056	1.79514	-0.192469	-1.55774	-2.21584
ECD_02448	sensor protein kinase regulating glmY sRNA in two-component system with response regulator GlrR	-0.00585302	-0.0849438	-0.0693305	-0.144598	-0.415761	-0.142977	-0.138616	-0.230978	-0.252308	-0.185984	-0.0657375	-0.0623291	-0.0853743	0.0106898	0.0091825	0.0256588	0.0285528	-0.0387518	-0.51432	-0.518839	-0.511739	-0.495068	-0.435223	-0.525695	-0.526736	-0.541553	-0.506939	-0.491106	-0.03877	-0.02968	0.180048	0.326181	-0.203707	-0.225895	0.201182	-0.0256538	0.201499	-0.18657	-0.166631	0.154231	-0.17555	-0.219411	0.688612	0.235366	-0.00308335	-0.227947	0.0196252	0.357291
ECD_00434	putative DNA-binding transcriptional regulator	-0.751088	-0.531996	-0.599233	-0.566137	-1.0269	-0.56576	-0.555131	-0.596807	-0.639217	-0.605262	-0.501346	-0.533174	-0.540405	-0.487249	-0.478707	-0.456423	-0.456131	0.124468	-0.106606	-0.109214	-0.0930957	-0.0682473	-0.163767	-0.100024	-0.147245	-0.144439	-0.115853	-0.305563	-1.25971	0.140205	-0.529503	-0.916305	-0.954028	-0.94613	-0.933146	-0.967671	-0.288732	-0.93848	-0.914732	-0.934946	-0.920296	-0.916773	-1.02337	1.43614	-2.0323	-0.397224	0.407408	-0.681827
ECD_02721	isopentenyl diphosphate isomerase	0.133655	0.415878	0.149467	0.176551	0.560432	0.347404	0.190599	0.155659	0.302263	-0.187922	0.102864	0.103273	0.169707	0.170378	0.128408	0.164318	0.148474	-0.0681558	0.331247	0.320962	0.325206	0.313065	0.235173	0.327659	0.258181	0.302763	0.354112	0.299683	0.234731	0.189185	-0.081786	0.181734	0.132734	0.150902	0.173333	0.139458	0.0469832	0.387184	0.476411	0.194368	0.184825	0.225458	0.232822	-0.163574	-1.16688	-0.34791	0.129553	0.519189
ECD_00856	nitroreductase A, NADPH-dependent, FMN-dependent	-0.439712	-0.97449	-1.04504	-1.00985	-0.768156	-1.01026	-0.996499	-1.04819	-1.09973	0.138301	-0.782003	-0.768993	-0.818742	-0.760982	-0.765942	-0.742524	-0.754824	-0.187534	-1.24037	-1.24258	-1.23679	-1.22431	-0.952032	-1.2454	-1.28531	-1.26237	-1.25095	-1.44127	0.403288	0.229546	0.456724	-0.262222	-0.317267	-0.134601	-0.242235	0.324064	0.49251	-0.338424	0.129293	0.152672	-0.306631	-0.296244	-0.423529	0.602776	0.846863	-0.59863	-0.3921	-0.910241
ECD_02726	site-specific tyrosine recombinase	-1.19484	2.55002	2.49753	2.49656	1.83396	2.55431	2.47313	2.45067	2.40053	-1.55871	2.08113	2.07874	2.02533	2.16383	2.12574	2.12827	2.17958	-2.03515	1.96296	1.94695	1.95367	2.07749	1.86452	1.95323	1.91546	1.94131	1.929	1.66029	-2.12065	-0.256585	-2.73142	0.996065	0.948436	0.878326	0.959143	0.839758	-1.65812	0.960445	0.932067	1.158	1.11873	0.935657	1.98466	-3.16387	1.64059	2.61784	2.29266	2.10447
ECD_02188	O-succinylbenzoyl-CoA synthase	0.030872	0.659176	0.562096	1.06481	2.61633	0.594549	0.625991	0.576648	0.466677	-0.337492	0.00588351	0.00948427	0.145075	0.0557617	0.0511629	0.0723077	0.0674656	0.511266	0.550659	0.53795	0.554307	0.552031	0.481406	0.526338	0.560785	0.528203	0.576404	0.447574	0.50501	0.135517	0.395125	0.476846	0.820812	0.433467	0.479874	0.724721	-0.0622653	0.463724	0.420473	0.415128	0.454618	0.459134	0.582605	0.327344	1.5739	-0.0322832	0.236865	-0.819738
[truncated: 2,276 more rows]
[truncated: 2 more columns]

## Sheet: Solid plate assays
sysName	desc	set2IT082 NoPhageControl	set2IT070 T2_phage_9.6875_MOI	set2IT071 T3_phage_3.4375_MOI	set2IT072 T4_phage_221.875_MOI	set2IT073 T5_phage_625_MOI	set2IT074 T6_phage_62.5_MOI	set2IT075 T7_phage_31.25_MOI	set2IT076 P1_phage_9.375_MOI	set2IT077 P2_phage_0.5625_MOI	set2IT078 lambda1857_phage_12.5_MOI	set2IT079 CEV1_phage_0.3125_MOI	set2IT080 CEV2_phage_84.375_MOI	set2IT081 LZ4_phage_4.6875_MOI
[truncated: 3,061 more rows]

[truncated: 2 more sheets: BL21_hits_fit5, Fig 7A data]
