# Supplementary material for: High-throughput mapping of the phage resistance landscape in E. coli
Source: PLoS Biol. 2020 Oct 13;18(10):e3000877. doi: 10.1371/journal.pbio.3000877 (PMC7553319; doi:10.1371/journal.pbio.3000877)
Supplement: S9 Table — Dub-seq, dual-barcoded shotgun expression library sequencing. (XLSX) [file pbio.3000877.s017.xlsx]

## Sheet: Info
S9 Table
This file contains Dub-seq BL21 data for diverse phages
Planktonic Assay	sheet provide fitness score data for each gene at different condition. Column headers provide information on phages and its multiplicity of infection value.
Solid plate assay	sheet provide fitness score data for each gene at different condition. Column headers provide information on phages and its multiplicity of infection value.
High_fitness	sheet provides filtered data that pass our stringent filters (Methods)
Fig7B data	dataset used in generating Fig 7B heatmap in the main text

## Sheet: Planktonic assays
gene_name	IT034_NoPhageControl	IT037_T2_phage_9.6875_MOI_LIQUIDassay	IT038_T3_phage_3.4375_MOI_LIQUIDassay	IT039_T4_phage_221.875_MOI_LIQUIDassay	IT040_T5_phage_625_MOI_LIQUIDassay	IT041_T6_phage_62.5_MOI_LIQUIDassay	IT042_T7_phage_31.25_MOI_LIQUIDassay	IT043_P1_phage_9.375_MOI_LIQUIDassay	IT044_P2_phage_0.5625_MOI_LIQUIDassay	IT045_lambda1857_phage_12.5_MOI_LIQUIDassay	IT046_CEV1_phage_0.3125_MOI_LIQUIDassay	IT047_CEV2_phage_84.375_MOI_LIQUIDassay	IT048_LZ4_phage_4.6875_MOI_LIQUIDassay
feoB	-0.195179	0.358971	0.0742806	1.08808	2.80426	-0.518156	1.04851	-0.126614	1.44645	0.911587	0	9.34216	-0.011058
glgC	-0.31311	-0.885059	-0.0934628	0.622068	-0.235217	-0.180371	9.19403	1.27459	4.79039	0.100676	0.6959	-0.65762	1.37243
dgsA	-0.185809	4.40027	0.0783726	3.56295	1.04638	4.64639	3.60006	3.98784	0.568542	7.6196	2.14888	1.2241	2.58132
ydiE	-0.546906	-0.000939094	-0.194796	0.16697	2.91819	-0.0275633	0	-0.216365	0.119635	-0.482607	0	5.67323	0
bolA	0.825366	-1.21427	1.08197	0	1.25988	2	0.991195	1.1129	1.10851	5.32635	2.80993	1.12918	3.39603
clpA	0.13912	1.74185	0.42637	-0.456378	0.193298	0.0934418	0	0.0435025	1.12166	5.06858	2.46549	1.99387	-0.732896
ravA	0.910829	1.69536	1.14099	0.644935	1.81656	1.42258	1.51261	1.14725	2.00343	5.04172	3.7378	2.83955	1.82475
ydfI	-0.351087	3.39037	0.0918597	2.29954	0.246428	3.04087	2.34992	2.31688	0.378026	4.88351	0.80978	0.57044	1.89109
mdtB	1.33077	1.07742	0.668767	0.846777	1.11119	2.41229	-1.07313	3.06174	1.39525	4.82002	3.41487	2.46053	1.11083
ybiW	-1.21466	-1.64518	1.17983	0.220811	1.5328	0.602951	2.74409	0.993625	2.64817	4.75786	3.13634	2.48231	0.825578
ycjX	0.892797	1.15835	0.554924	1.0314	1.44465	1.46678	1.72594	1.36481	1.45493	4.72767	3.01094	2.1746	1.37955
dnaK	-0.681015	1.42488	-1.44255	0.779242	0.46425	2.05235	1.61124	2.51154	-0.570834	4.66618	0.627087	-0.0369186	1.00272
macB	2.94486	1.89269	1.66359	2.3358	1.95414	1.78277	2.58279	2.43812	1.83972	4.64332	4.05213	3.26336	2.85852
yciT	0	1.30781	-0.0528105	0.199492	0	1.16475	0.953771	1.12005	0	4.61113	0	0.89561	-0.0857828
mdtA	0.637365	1.24695	1.08981	0.936854	1.33579	0.816999	1.25172	1.28628	1.44072	4.50462	3.01556	1.83458	0.808967
secA	0.369435	0.216141	0.300884	0.597739	-0.194717	1.21074	-0.0782501	0.253721	0.495564	4.48902	2.09451	0.96161	0.753814
yhbX	0	1.09153	0	1.68089	0	1.40711	1.65045	1.48078	4.35383	1.01639	0.598535	0.709995	1.05288
malP	-0.0686845	1.02321	0.279709	0.631294	0.841131	0.586249	1.14329	0.660669	0.387538	4.3522	2.0541	1.87651	0.516103
ynjC	0.517462	1.54687	1.01765	1.07994	1.57543	1.14089	1.67875	1.5559	1.23269	4.32067	3.11575	2.78054	1.43716
fdnG	-0.851737	-0.27681	0.602849	2.31745	1.59162	1.90139	1.37775	0.0818951	-0.528424	4.23832	3.61164	2.13327	1.01078
yjiY	0.19496	0.861191	0.622458	2.22239	0.290855	1.11806	1.4543	0.74366	2.36941	4.23681	-0.159478	2.43089	1.30844
ybhQ	0.320444	0.847189	0.630152	1.20986	1.55197	0.402756	0.381605	1.17264	1.0041	4.22736	2.39954	1.57274	1.0953
treA	0.672589	1.76312	0.753635	0.902907	1.65704	1.79796	1.7548	1.24247	1.5121	4.20675	3.03677	2.79983	2.02546
pflD	-0.0652628	2.5672	1.39818	1.08488	1.81079	1.53542	0.969504	0.821797	0.28743	4.19536	3.07185	2.57129	1.65567
msbA	-0.440831	1.83883	0.845696	0.461631	0.561124	1.12689	1.03385	-0.00648706	1.51985	4.17422	2.22688	0.989355	0.973335
nuoG	0.952278	-0.648528	-0.356746	1.56828	1.55907	1.04891	1.69277	1.63387	2.30317	4.04836	3.0933	2.58413	0.291766
hcr	0.0680778	0.768997	0.698253	0.671366	1.23994	0.644421	0.396812	1.24711	1.25482	4.02503	2.74071	1.96594	0.777555
bcsA	-1.39471	2.01173	1.17293	0.483726	1.66496	0.404796	0	-0.0795993	2.17504	4.01536	1.84347	2.06494	1.09284
cpxR	-2.39187	-1.32457	-0.568438	0.472068	-1.7466	0.210368	0.260165	0.191184	-1.37801	4.00094	1.27685	-1.72154	0.195551
ydhC	-0.0360628	1.02798	0.737528	0.913153	1.50972	0.486692	0.862484	1.16923	1.13482	3.95482	2.28342	2.77158	1.00343
eutA	-0.922609	1.13466	0.815018	0.93778	0.930957	0.613913	2.10086	1.8453	1.20363	3.95449	2.61217	2.1505	1.26635
entH	-0.156584	0	0.640865	0.640841	1.777	0.0351592	0.84932	0.590791	1.23609	3.91977	2.42165	2.0867	0.278866
wcaB	0.205232	0.449292	0.691834	0.267769	1.13462	0.597056	0.606054	0.427993	1.20898	3.79503	2.57429	1.98311	1.39617
yphG	-0.0226313	0.454566	-0.115373	0.140863	0.381625	0.910995	-0.90458	-0.378512	-0.972247	3.79271	3.13403	1.44976	0.60131
mukE	0.407791	1.20464	0.672062	1.33512	1.26874	0.486745	1.34966	1.14007	1.15509	3.77799	2.49973	2.49283	1.60001
malE	-0.128915	1.28781	0.381817	1.15744	0.854535	1.43341	1.06563	1.04616	0.91376	3.76551	1.51897	1.27237	1.06288
ydhQ	0.235243	1.20553	0.747277	0.443965	0.890927	0.785393	-0.3136	0.616412	0.867586	3.74835	2.24788	2.83906	1.29144
hepA	-0.561636	0.811486	0.778746	0.677475	0.389555	0.239805	0.883661	0.226148	1.74718	3.74458	2.94115	0.28131	0.539303
ydcR	0.90121	0.128605	1.12843	1.21694	1.47995	0.801375	1.03761	0.916423	1.84523	3.73172	3.52738	2.28211	0.96341
folD	0.357048	0.913281	0.384341	0.696586	1.36955	1.07156	0.444014	0.518666	1.11029	3.72887	2.66484	1.4449	0.389678
yeaX	0.707996	1.19019	0.496503	0.818008	1.03629	1.08517	0.822638	0.211068	0.866151	3.70329	1.89205	1.95323	1.44498
yqeB	-0.184612	0.122163	0.503164	0.482803	0.379397	0.583033	1.81641	0.396762	1.34086	3.69092	2.05244	1.93247	0.980276
yddW	0.343526	1.22573	0.6073	0.712494	0.287489	0.429767	1.28429	0.0159835	0.308947	3.67411	2.14086	1.34652	0.760732
uvrC	-0.383221	-1.75402	0.122724	-0.689212	0.55155	-1.37851	0.265345	0.0544478	0.0456746	3.64254	0.388349	1.59831	-0.96573
ydeE	1.53382	0.0355523	1.07558	0.12817	1.02934	0.355427	1.04524	0	0.541481	3.61208	1.43125	0.833383	0
dxs	0.356023	1.20875	0.869188	0.260049	0.842003	2.83996	1.06147	0	1.16654	3.59197	2.677	2.04996	0.0913192
ybgH	-0.930496	0.74671	0.15595	0.434182	0.0787296	0.852824	1.56987	0.79682	0.764208	3.58767	1.95098	0.110208	1.4263
mhpB	0.824209	1.46148	0.633872	0.913252	1.4799	1.27931	0.663566	0.938603	1.62357	3.58048	2.36318	1.92196	1.20343
ybaP	-0.378851	0.422401	0.560985	1.26026	1.05999	1.56826	1.00164	1.75199	0.237715	3.56766	2.30829	1.37552	0.614153
trpE	-0.680151	0.464351	1.02511	1.25854	0.674317	1.91484	1.41072	1.30022	1.15497	3.5637	1.99747	1.77198	1.09176
ytfM	0.620649	0.89252	1.0825	0.744733	0.65698	0.798305	0.567633	0.715455	0.511917	3.56337	2.39005	1.82292	1.22066
ycfT	-0.204729	-0.420474	0.427123	0.510097	0.791313	0.458624	0.766077	0.920522	0.639194	3.5631	2.21291	1.27227	0.826425
lacY	0	0.877849	0.125981	0.368804	1.3886	0.790637	0.524585	0.515442	1.71505	3.54941	2.45545	1.59493	1.39823
ybhC	-0.897283	-0.455725	-0.0716678	-0.320666	0.178938	-0.504919	3.51462	-0.0224105	0.488352	0.0632333	0	0.125351	0.992345
atpD	0	1.16798	0.298593	1.45581	0.615509	1.37862	0.680821	0.948994	1.01884	3.5032	1.81858	1.37936	0.746374
nhaB	0.724045	-0.405432	-0.172485	0.534688	0.308445	1.80678	0.407541	0.140002	2.10551	3.46121	1.45008	-0.00365455	1.42212
damX	0.432221	0	0.0430035	-0.194471	0.912237	-0.387351	0	0	-0.28477	0	-0.191578	3.46074	0.0886117
murI	0.81101	0.211162	-0.294698	0	0.456275	2.65762	-0.692427	0	-0.0820221	3.44924	0.845614	1.96677	-0.187498
bglX	1.13154	0.55314	-0.183049	0.353308	0.409948	0.920096	0.48347	-0.274389	2.17506	3.44224	0.334883	0.90151	0.351674
acnA	0.681436	0.658336	0.454535	0.611733	-0.529901	0.329951	0.448924	0.399613	0.117013	3.43002	0.0992554	0.75403	-0.287122
acrB	-1.0751	-2.18286	-0.199204	-1.38109	-0.59976	-1.48543	-0.841571	-1.63743	3.42705	0.410933	-0.762961	-1.57469	0.66432
trpD	0.605889	0.962096	0.777994	0.141522	1.30642	1.35254	0.45969	0.951746	0.83059	3.39422	2.73121	2.27005	1.30416
uxaC	-1.18003	0.494449	0.962149	0.175511	0.568686	-0.00359982	1.04235	0.603528	0.224537	3.39234	2.21233	1.2431	0.246392
fhiA	0.0708287	1.21606	0.677661	1.16182	1.07809	0.656854	0.816246	1.48707	0.820886	3.38841	2.51482	1.91188	1.02125
fadH	-0.458845	0.913885	0.770541	0.298781	0.72496	0.504875	1.14389	0.830557	1.15444	3.36582	2.5138	2.20212	1.81681
kdpC	0.227214	0.194661	0.584846	0.640007	1.03356	0.577303	1.62522	0.861696	0.90907	3.35912	1.73351	2.06812	0.640062
kup	0.179029	2.1479	0.589653	1.3546	1.15073	1.35384	1.44246	1.35107	1.01717	3.33395	2.0022	2.24628	0.599257
yacC	0.294368	1.44054	0.579109	0.587694	1.11481	0.936361	0.755916	0.849401	0.425061	3.33292	2.17968	1.77222	0.767513
pbpC	1.73759	0.698366	0.69969	1.78905	1.72284	1.00228	1.61865	-0.118687	3.0107	2.69554	3.29958	2.07613	2.51197
livG	0.436769	1.01838	0.801971	0.564968	1.28696	1.28736	0.821257	0.598352	1.72564	3.29464	1.58419	1.90033	0.694665
ynjI	0.0560104	0.464292	0.692994	0.420153	1.34821	0.811469	0.739386	0.618605	0.8402	3.28738	2.1311	1.57781	0.9127
rluA	0.485939	1.35759	0.435903	0.695964	0.760519	0.508896	0.208321	0.524672	0.71496	3.28489	2.1867	1.54152	0.556174
araB	0.541333	0.0680402	0.538841	0.668637	0.88729	0.518545	0.497409	0.302874	0.421679	3.274	2.16564	1.305	0.440017
mrcA	-1.5424	0.904458	1.36086	0.0918223	1.00367	0.871169	-0.157204	0.322315	0.40198	3.27175	1.36143	0.276185	0.522823
smtA	0.653198	0.9637	0.489424	0.60575	0.757477	1.0769	1.07079	0.965328	1.13362	3.25815	2.29484	1.43117	0.62401
rbbA	0.103337	0.450108	-0.0600573	3.25567	0.000186663	-0.0196375	-0.110431	-0.187673	-0.455049	1.79955	0.556741	0.44134	0.432883
yfhK	0	0.799258	0.503924	0.913388	1.05654	0.444362	0.662078	0.411431	0.980566	3.2348	2.04511	1.82986	1.43671
rnhA	0	1.81553	0	1.39534	0	1.23796	0.647106	0.0156022	0	0.287323	3.23013	0	2.8808
flgD	0.24134	0.797975	0.448716	0.43709	0.52196	0.566552	0	0	0.52295	3.22372	1.3862	1.26519	0.46469
ubiG	-0.0154997	0.527209	0.229262	0.841227	0.709928	1.02785	1.20718	0.80417	0.712843	3.21257	1.48989	1.41644	0.882846
hypF	-0.63767	1.10749	0.659324	0.45841	0.753799	1.23857	2.27028	0.0670447	0.871707	2.79171	3.20219	2.51797	0.883392
fadJ	-0.243616	0.717763	0.376724	0.486424	0.567673	0.464414	-0.27213	-0.0107845	0.859643	3.1992	1.88549	1.8656	0.719038
tynA_2	0	0.44133	0.313793	0.8543	0.26679	0.214769	1.65111	0.986764	2.14733	3.19252	2.46555	1.07654	2.41467
ybiC	-0.106601	-0.533956	0	-0.288905	-0.137747	0.120275	-0.480612	0	1.0576	0.54565	3.19054	1.219	1.26748
cysJ	0.376549	0.299582	0.240922	0.571541	0.589864	0.358365	1.54605	0.915685	0.247417	3.16962	1.18044	1.79916	0.292479
pflC	0.486184	0.897528	0.545917	0.266889	0.93284	0.680261	1.64663	1.11721	0.983497	3.16663	2.35048	1.65592	0.309956
ycbZ	0.240403	1.66513	0.130944	0.296982	-0.59976	1.19265	3.15843	1.04064	1.61683	1.24101	-0.0848889	-0.31166	0.0204641
higA	0.255437	0.188618	0.729196	0.760323	0.934741	1.01552	1.11492	0.716741	0.665699	3.1453	2.08864	0.930525	0.502141
yjaB	-2.65913	1.22685	0.931415	0.0751784	0.845149	1.17249	0.981246	0.881869	0.482314	3.13404	3.13225	2.14727	-0.201339
yhfW	-0.157266	0.938626	0.478874	0.378135	0.465412	0.734825	0.510875	0.233562	0.617288	3.10566	0.628235	0.273933	0.267645
yoaB	0.644238	1.66219	0.745982	1.03138	1.10681	1.15391	1.28152	0.453216	1.29973	3.07872	2.31993	1.96795	1.55373
rep	-0.643076	0.967178	0.549225	0.588748	1.02304	1.07952	1.69949	0.882324	1.34995	3.05759	1.5722	1.55067	0.384984
lacA	0.469758	0.624466	0.717488	0.391614	0.98249	0.916636	1.27535	0.827373	1.2813	3.04948	2.45869	2.20061	0.8059
norV	-0.204546	0.921261	0.686932	0.36724	0.790983	0.814824	0.94729	0.749004	1.62555	3.03489	2.28967	1.43533	1.02415
ybl76	0.598246	0	0	0.30044	1.54123	2.11209	0	0.844009	1.19193	3.01641	1.83526	1.67194	0
nrfD	-0.18804	0.666134	0.256722	0.251591	0.734003	0.577101	0.231366	0.198944	0.822157	3.01357	2.12678	1.25474	0.716884
yhbV	0	0.668408	0.740768	0.579366	0.992433	0.716513	1.15191	0.707081	1.41579	3.01344	1.98427	1.36072	0.594733
argG	0	1.31935	-0.309033	2.67436	0	1.05457	2.93726	3.0129	1.23017	0	0.876426	0.447866	1.18407
speF	-0.3235	0.0614963	0.392488	0.0703169	0.822882	0.300638	0.225739	-0.0810843	0.850547	3.00692	2.1336	1.2373	0.000448821
ybbP	0.931195	1.12207	0.191016	0.693742	0.361354	0.830178	0.786609	1.16147	0.825483	2.9993	1.87903	1.05345	0.350665
bamC	0.465378	0.175951	1.49736	0.309208	0.493818	0.398571	1.27556	0.402393	1.17827	2.99122	1.4917	1.44899	0.286232
hslU	0	1.45546	0.523479	0.594874	0.557856	0.722224	0.951812	0.568771	0.494662	2.9812	1.15615	0.626107	0.312279
ylcI	-1.46874	-1.03476	-0.10382	-0.540596	-0.281635	0.462377	-0.529397	-0.796935	-0.875897	2.97868	-0.133692	-0.62689	0.785338
ygbJ	0.306209	1.13347	0.754798	0.798077	0.610418	0.825021	0.790455	0.731646	0.775443	2.97725	1.40872	1.22748	0.851358
yfiE	0.213073	0.611591	0.495069	0.101723	0.793097	0.469295	0.802341	0.754966	1.39574	2.97574	1.79565	0.854379	0.806484
fruA	0.00727836	0.201247	-0.0727917	0	0.906857	0.127418	0	0.282229	0.486799	2.97486	1.13207	1.21827	1.09965
menH	0.464957	0.6742	0.574079	0.183781	0.387267	0.645971	1.06224	0.332291	0.113838	2.9721	1.8727	1.13235	0.685981
trpT	-0.521447	0.094005	0	-0.0972972	-0.280287	0.585866	0	-0.353637	-0.947373	2.93219	0.547129	0.709099	0
hypD	0.287148	0.599388	0.478831	0.538905	0.0484603	0.836741	0.534761	0.400482	0.855783	2.93089	1.49069	0.716363	0.493983
livJ	0	0.639902	0.128374	0	0.745554	0.981695	0.644211	0.574409	0.514489	2.91693	2.13244	0.970083	1.37609
acrD	-0.361425	0.45145	0.058913	0.679068	0.387519	1.19073	0.852076	0.227741	0.561125	2.91146	0.54734	0.999034	1.95136
nrfE	0.366579	1.16668	0.842814	1.01786	1.31596	0.689352	1.02172	0.863531	1.37425	2.90155	2.40665	2.11781	1.75365
yhaH	0.174462	1.1082	0.914831	0.161695	1.56021	0.902319	0.434566	0.820041	1.08454	2.89942	2.08754	1.72565	0.895273
prpE	-0.80258	0.485788	0.427837	1.95813	0.194963	1.10865	1.18279	0.993365	0.475991	2.89739	1.52831	1.74824	0.44562
ddpA	0.828579	0.945282	0.570019	0.336519	0.571799	0.440182	1.25952	0.710908	1.21456	2.89731	2.07437	1.51164	1.63364
fadD	-0.15238	0.782163	0	0.80124	0.343476	0.704721	0.793591	0.649728	0.536605	2.89406	1.19417	1.75053	0.396187
ycgY	0.238905	0.289074	0.555945	0.558882	1.09003	0.509821	0.0530064	1.00555	1.15858	2.88723	1.97365	1.54302	0.431794
mdtO	-0.960552	0.00443023	0.252538	0.303729	0.492787	0.19695	0.0599929	0.386286	1.44037	2.88104	1.12453	0.769682	0.238967
yrhB	0.417761	0.65162	0.225664	0.351074	0.634878	0.541211	0.321079	1.05451	1.21069	2.87743	0.811397	1.25151	1.1546
cusA	-0.355207	0.121991	1.07088	-0.661198	1.16453	0.234465	-0.121679	0.667425	-0.926311	2.86779	2.62936	-0.532874	-0.937716
nudJ	-0.19987	0.31934	0.436772	0.62364	0	1.03119	1.2233	0.326084	0.0629771	2.8554	1.89821	1.05983	0.740036
hemF	0.0638877	0.837523	0.552158	0.68049	0.692149	0.274041	0.686342	0.894045	1.03961	2.85089	1.94908	1.71985	0.353791
dos	0	0	0.0487019	0.717591	-1.01292	1.91928	0.445194	-0.0670463	-0.0721765	2.84727	0.958151	-0.0987271	1.23179
rpsL	0	1.41269	-0.84212	-0.0347654	-0.96233	0.344648	0	2.19265	2.84684	-0.0347654	0.526546	0.965235	0.172467
glmU	0.18806	0.259249	0.318444	0.452679	0.0320289	0.712667	0	0.555513	0.753305	2.82078	1.58593	0.830576	0.565046
ybdL	0.0430916	0.0982977	0.628535	0.361504	0.682924	0.432248	0.966245	0.880278	0.602496	2.80808	1.38755	1.67403	0.969507
exuT	-0.563388	-0.00637015	0.0866971	0.664306	0.442372	0.465534	1.32261	0.618598	0.875459	2.8044	1.43759	0.939518	0.299444
tnaB	0.221015	0.534252	0.381169	0.584818	1.00955	0.459817	0.597738	0.545992	0.82196	2.79687	1.82017	0.947197	0.0127508
yfhG	0.390815	0.514121	0.536873	0.193773	0.901056	0.131314	0.919643	0.447632	0.912822	2.79607	2.03746	1.89861	1.03792
pncB	-0.807176	-0.767213	-0.448207	-0.465439	0.169571	-0.569776	0.574081	0.570702	2.78982	-1.84334	-0.893864	-1.15904	-0.741957
yoaA	-0.679442	0	0.251088	0.116462	0.192833	0	0.107053	1.18053	0.827669	2.78607	2.09411	1.14827	0
malQ	0.120555	-0.485157	0.284357	0.343313	0.400647	0.55057	1.03213	0.682209	-0.12629	2.78262	1.09012	0.936137	0.992011
pta	0	-0.534919	0.853737	0.802264	0.643545	0.357487	1.2068	-0.167019	0.661933	2.78225	2.19215	1.2398	1.57012
ybl139	0	0.723923	0.490502	0.937108	1.188	0.911626	1.3639	0.810176	0.184256	2.78145	1.92723	1.41689	0.88243
bamA	-0.376268	0.270854	-1.40084	0.902703	-1.14604	-0.201634	-0.557778	-1.35364	-2.94737	2.77273	0.427723	-0.968973	1.79611
can	-0.282	1.04548	0.697861	0.579338	0.602596	0.597662	1.21752	1.03931	0.300878	2.74461	1.44057	0.226299	1.27507
gyrA	-3.19256	1.32903	0.293836	-0.328623	0.774636	1.56704	0.210897	2.73697	1.62866	2.6154	2.61143	1.7997	0.39486
fecA	-0.233794	0.537802	0.27243	0.63928	0.632632	0.143676	0.275229	0.130333	1.47479	2.73475	1.44692	1.28349	0.433
lafU	0.47831	0.68273	0.687173	0.281415	0.890287	0.814061	1.5164	0.888048	0.670285	2.73381	1.52107	1.24469	0.529136
hydN	0	0.275058	0.657926	0.428621	1.10532	0.383352	0.646645	0.198671	1.65383	2.72441	1.81808	1.46752	0.492064
efeO	0	0.998286	0.194027	0.209677	0.856348	0.821885	0.806016	0.495835	0.379997	2.71156	1.41504	2.04676	0.935857
glgB	0.517934	0.840317	0.0585988	0.247362	-0.0325141	0.184644	0.457668	0.729221	0.337031	2.71002	1.3318	1.20483	0.804647
uvrA	-1.53647	-1.65028	-0.737148	-0.0724041	-0.763888	-0.0144962	-0.124658	-0.239631	2.70776	-0.647107	-0.322475	-0.750472	0.755126
cheA	-0.00143632	0.719856	0.948799	0.963682	0.644482	0	1.38202	0.84608	0.442219	2.70628	2.23231	1.55854	0.425175
yehM	-0.471875	0.602363	0.364921	0	0.450698	1.13406	1.23761	0.344091	1.22596	2.69558	1.45067	0.941979	0.382859
ydhK	-0.070373	0.282032	0.424117	0.358157	0.500832	0.0805324	0.0848496	0.0958329	0.347302	2.68621	0.814555	0.904927	0.22541
uxaB	-0.357862	0.0981382	1.20019	-0.107151	0.84377	0.771571	0.710858	0.909495	-0.161702	2.66346	2.41481	1.30302	1.33413
yjeP	0	1.23217	-0.161639	1.61891	-0.510383	0	0.570082	1.36257	1.18387	2.65605	0	0.647698	0.75743
ompW	0.117295	0.308783	0.48091	0.24389	0.82715	0.432764	0.215858	0.812179	0.267925	2.65335	0.83092	1.44622	0.296891
bisC	0	0.315488	0.381748	0.869607	1.07813	1.03734	0.832555	0.267128	0	2.65213	1.33165	0.860764	0.999455
cueO	0	0.139318	0.150568	0.680946	0.304631	0.429085	0.687702	1.24844	1.20069	2.65118	1.27818	1.48327	0.207907
psiE	0	0.559017	0.282597	0.142482	0.529569	0.833488	0.580595	0.576449	0.608244	2.64535	0.867906	0.118824	0.920782
ptrA	-0.501819	0.0603402	0.352732	0.165955	0.269214	0.0616188	1.41299	0.409616	0.0345827	2.10273	2.63373	1.98723	0.447176
hupA	-0.358204	2.62323	0	2.1352	1.77416	2.00428	1.04706	1.4012	-0.616714	1.81782	0.233354	0.00675199	0.932799
yncG	1.13329	1.34076	0.586076	0	0.196167	0.354866	0	-0.0549079	0.581445	2.62306	2.28882	1.6827	1.03663
kdpD	-0.366155	0.690241	0.235394	1.47273	0.372819	1.33937	1.40841	1.09368	0.942849	1.89066	2.6215	1.19264	0.472755
ytfL	-0.378367	0.444455	-0.117306	-0.0594111	0.251418	0.80266	2.05325	0.0107122	0.367286	2.62142	0.281813	0.571726	-0.0859288
gshB	0	0.94469	0.0263121	0.285449	0.532515	0.0860878	0.407726	0.833218	0.290903	2.61208	2.05924	1.01349	0.653929
lpxK	0.00956645	0.455296	0.450167	0.307963	0.689264	0.613675	0.695854	0.698362	0.608487	2.60047	1.47648	1.25353	0.553817
yeaW	0.00234237	0.428487	0.849734	0.660126	0.876152	0.939283	0.746967	1.28771	1.24157	2.58003	2.4552	1.79518	0.443214
glcA	0.229678	0.474256	0.427754	0.734109	0.819276	1.2218	0.955431	1.06045	1.32385	2.5761	1.4131	1.69604	0.825033
cbrA	0	0.18123	0.215641	0.409092	0.268745	0.267294	0.11739	0.156893	1.0038	2.57482	0.575493	0.308874	0.207121
atpC	0.234077	1.24755	0.690841	0.427405	0.992816	0.688937	1.23866	1.28509	0.525104	2.56393	1.68069	1.47786	1.122
yafM	0.351439	0.436464	0.344188	0.0969068	0.733743	0.50078	0.00614971	0.0938925	0.93083	2.56385	1.79325	1.18209	0.937805
ypdE	0.419144	0.67251	0.277855	0.437771	0.470302	0.376726	0.709047	0.733112	0.526812	2.5591	1.50327	0.96532	0.124451
htrE	0.0946625	2.55033	0.252125	-0.105107	-0.371269	-0.779134	0.41695	0.139858	-1.42375	0.157196	-0.0454839	0	-0.451315
ynl73	1.01761	0.287262	0.332132	1.92909	-0.151974	0.163367	1.42912	0.769071	0	2.54958	-0.0698317	0.287208	0.608836
rsd	0.625621	0.705461	0.586922	0.658183	1.05585	1.10089	0.227166	0.344545	1.70306	2.54631	1.57187	1.72279	0.241516
ddpB	0.0142249	0.475426	0.26634	0.0661901	0.586906	0.268641	0.38611	0.544612	0.555346	2.54459	1.51988	1.06826	0
sucA	-0.852706	2.53138	-0.199204	1.42626	0.792558	0.321928	0.965784	1.16993	-1.42381	0.048363	0.851749	0.554589	2.14975
gcd	0.40592	0	0.947195	0.152548	0	0.0915469	-0.309339	0.942178	2.12751	2.52703	1.4613	1.86336	0.332987
pal	0.714334	1.03953	-0.369129	1.25634	-0.547292	0.567041	1.2109	-0.584963	2.52174	-0.706524	-0.388565	0.647698	-0.60514
tig	-2.39187	-1.32971	-0.153401	0.472068	-0.424673	0.367732	1.01159	1.21573	-0.378007	1.67913	-0.32484	-0.721536	2.51748
mukF	-3.46004	0.0979241	0.0605618	0	1.29153	2.51326	-0.0565835	0	-0.861216	0.476821	1.63082	0.472353	0
yhhK	0.642007	0.998004	0.634385	0.94435	1.24091	1.36672	1.2367	0.728237	1.12683	2.5111	2.14799	2.177	0.487019
nikR	0.370048	0.645795	0.513496	0.50758	0.634939	0.0598913	0.990794	0.51365	0.41238	2.50995	1.4728	1.46046	0.196806
ybaK	-0.218701	0.269364	0.197369	0.113652	0.80687	0.213215	0.63431	0.207614	0.887182	2.48454	1.10036	1.40329	0.337904
tap	0.0339872	0.140999	0.253432	0.409345	0.586024	0.0415206	0.517484	0.473029	0.854226	2.47923	1.49618	1.17213	0.595792
ushA	-0.240184	0.351614	0.185768	0.567817	0.832265	0.441325	1.32292	0.598905	0.848409	2.47071	0.979773	1.11661	0.145617
yadG	0	0.511959	0.0491251	0.498212	0.771912	0.862147	0.608823	0.8768	1.61057	2.46416	1.01689	1.5782	0.980393
eutB	0.156714	1.15083	0.585963	0.45366	0.507937	0.984113	0.610384	0.367563	0.526765	2.46271	0.843198	1.10902	0.309736
aceE	2.45542	0.817136	-1.4216	1.61891	0.570165	0.514573	1.15843	0.36257	-1.23117	0.241008	0.237039	-1.57469	1.34239
acrE	0.368204	0.168104	0.450983	0.0431743	0.683843	0.554737	0.543919	0.315705	0.627681	2.45197	1.3044	1.22546	0.515351
hsdR	2.1012	1.1445	0.282328	1.86827	-0.819885	1.40136	0.822826	1.61193	0.655624	2.44973	0.840036	1.20518	1.22918
groL	0.228659	0	0.606726	0.709275	0	0	0.0829277	0.0892862	0	2.43744	0.873793	0.294381	0.580968
fabH	-0.744853	-0.824765	-0.0691293	2.43443	-0.350797	-0.507932	-0.00242203	0	-2.14636	0	-1.08437	-0.0540809	-0.243636
rbsC	0.0975409	0.58348	0.0304655	0	0.404777	0.556179	0.0228145	-0.098057	0.508547	2.41897	1.25561	0.99514	0.457182
ptsG	-0.224498	-0.0557013	0.0471266	-1.02313	0.00811818	0.154853	-0.233612	-0.38323	1.35469	2.4154	0.960048	-0.381773	-0.653408
argB	-0.164998	0.106735	0.304594	0.147069	0.264849	0.121989	0.161112	0.272717	0.0612682	2.41081	0.97498	0.857702	0.298617
rhsD	-0.165589	1.98403	-0.11977	2.28331	0.386566	0.594008	0.237864	-0.557995	-1.15173	2.40791	-1.09856	-0.910297	-0.578173
rfbD	0.437634	0.779483	0.203548	0.481609	0.528951	0.797994	0.483299	0.726188	0.363589	2.40373	1.75353	1.41531	1.17489
menD	-0.0277518	0.530906	0.224918	0.869855	1.0147	0	0.76288	0.550829	1.93616	2.39984	2.06536	1.39278	0.582176
yeaZ	0.35477	0.21668	0.448263	0.469113	0.737316	0.569139	0.403109	0.284816	0.711209	2.38802	0.91409	1.269	0.732107
yhjQ	0.187221	0.381816	0.336777	0.649063	0.49731	0.598251	0.0297481	0.602172	0.248582	2.37102	1.66236	1.01979	0.685153
pabA	0	0.228923	0.195686	0	0.783868	0	0	0.513885	0	2.36271	0.841021	1.17959	0
norR	-0.645666	0.215299	0.51397	0.531422	0.515304	-0.0601716	0.156768	0.592005	0.0882733	2.35959	0.789872	1.26975	0.208834
dtpB	0	0	0.608758	0.484185	0.635824	0.370274	1.18049	0.933068	0.692391	2.35738	1.13416	0.691	0
rnd	0	0.362056	0.70017	0.366842	0.773111	0.234325	0.729005	0.44658	0.933939	2.34168	0.944305	1.32571	0.497037
yehW	0	1.57373	0.595186	0	0.859826	0.684647	1.41455	0.732716	0.913203	2.33607	2.10428	1.53459	0.53755
potC	0	0.543109	0.25544	0.311488	1.01711	0.759397	0.982865	0.106079	0	2.32871	1.1364	1.42854	0.606257
yoaE	-0.444251	0.056283	-0.230264	0.768719	-0.172948	0.198806	0.439081	0.46494	-0.0165304	2.32798	0.844527	-0.275217	-0.0206509
ilvI	0.864398	1.00084	0.391307	0.771682	0.711156	0.570573	0.256092	1.54412	0.328116	2.31668	1.82636	0.908154	0.637971
mdtM	0.397293	0.0881486	-0.0644583	0.41822	0	0.483466	0.676607	0.0411356	0.160119	2.31617	0.974239	0.256279	0.240562
ugpB	0	0.688502	0.0697104	0.164162	0.263856	0.41038	0.323753	0.368582	0.411605	2.31075	0.67413	0.548452	0.219787
agaS	-0.934424	0	0.658908	-0.136763	0.552694	0.267929	0.237169	0.27458	0.278338	2.31069	0.968798	0.611778	0.207755
yihU	0.0410147	0.342302	0.443274	0	0.829781	0.772496	0.587929	0.636755	0.358144	2.30823	1.39263	1.16955	0.292581
yfaQ	0.0469388	0.316667	0.255261	0.224919	0.567418	0.397557	0.781456	0.76244	0.898888	2.30506	0.73859	1.45464	0.702177
maeB	-0.404913	0.604431	0.648882	0.513989	-0.0773902	0.436161	0	0.532653	0.291828	2.29919	0.908746	1.74642	1.06642
yccF	0.566526	0.359938	0.445083	0.137479	0.900222	0.558471	1.45606	0.526925	0.831151	2.29409	1.81569	1.23724	0.324988
yccU	0	0.0135753	0.0184447	0	0.982007	0.318321	0.552783	0	0.221528	2.28296	1.20656	1.51264	0.350135
lexA	-1.59737	-0.733958	-0.503862	-0.166715	0	0	0.632689	0.0182347	-0.185913	2.28101	0.419578	0.57069	0.601488
hflX	0.271475	0.562992	0.112881	0.103654	0	0	0	0.172284	0	2.2791	1.90658	0	0.160869
ybiY	0.47427	0.556492	0.660106	1.12749	0.76314	0.674131	1.28189	1.08163	0.866028	2.27402	2.03109	1.32761	0.431411
ybl227	0	0.194622	0.49764	0.206661	0.582897	0.242149	0.726318	0.435326	1.07765	2.26283	0.546718	1.32134	0.186049
ydiM	0.183418	0.460025	0.399795	0.443284	0.380354	0	0.280269	0.920936	1.6185	2.26042	1.63908	1.43353	0.640496
fixA	0.292432	0.275008	0.336726	0.558303	0.699531	0.420923	0.682007	0.115024	0.642119	2.25945	0.908468	0.858503	0.121928
yraJ	0	0.966406	0.0898646	0.859747	0	0.321169	0.818784	0.621909	0	2.25929	0	0	0.833229
malK	-0.0192801	0.780553	-0.116709	0.525857	0.0815642	0.49818	0.884573	0.787974	0.174585	2.25516	0.465675	0.222047	0
ybjN	-0.083975	0.214414	0	0	0	0.353676	0.470496	0.603423	0.148143	2.24782	0.595018	-0.292999	0.0253797
frvR	-0.052887	0.486776	0.232676	0.930488	0.801697	1.38407	0.810519	0.732651	1.81454	2.24516	1.37086	1.09245	0
potH	0.47673	0.139617	0.446934	0.0633377	0.69442	0.0559123	-0.179563	0.846219	0.315429	2.24183	0.884473	0.735234	-0.00450994
yhfK	0.148108	0.75318	0.330168	0.165335	0.359797	0.0736774	0.154606	0.0350357	0.534093	2.12852	2.24103	0.765972	0.538721
pulF	0.174884	0.323202	0.239892	0.433409	0.243014	0.85085	0.116395	0.108893	0.33952	2.23888	1.3171	-0.35914	0.0241847
chbF	-0.0055998	0.400275	0.346039	0.422218	0.215064	-0.148167	0	0	0.357002	2.23659	0.826923	0.263245	0.415138
ydcS	0.633758	0.966599	0.637715	0.413904	0.69405	0.745885	0.933476	0.767217	0.82411	2.23342	1.5841	1.11328	1.01096
ttcA	0	0.705293	0.51986	0.495099	1.32753	0.387669	0.0606414	0.297634	0.934621	2.23103	1.51685	1.72283	0.62577
yddG	0.648858	0.201277	0.362881	0.298644	0.998068	0.856714	0.966199	0.537179	0.606984	2.20814	1.48531	1.18667	0.686347
lacZ	-0.574178	2.20576	-0.0635534	-0.00272574	-0.0514701	0.600456	0.744313	-0.259065	0.533494	-0.588146	0.245667	0.644582	-0.571725
srmB	0	-0.0317463	0.055972	0.110196	0.276821	1.08937	0.528959	0.900125	1.28691	2.20244	1.0082	1.3723	1.01955
yeaY	0.121992	0	0	0	2.19807	0.0954982	0.618151	0.351848	0	0	0.276946	0.951726	0.364586
yjbB	-0.264663	-0.0868074	0.318698	0.0994212	0.310586	-0.550271	0.891923	0.114506	-0.497029	2.18509	0.282068	0.171627	0
glpD	0	0.0719807	0.154506	-0.340306	0.87832	0.0221258	-0.52818	0.0660301	0.268217	2.17461	-0.188231	0	-0.462393
yrfG	0.137685	0.176775	0.112212	0.867298	0.282651	0.721185	0.234431	0.103021	0	2.16561	0.713312	0.407525	0.314642
aegA	-0.4153	0.781579	0.587539	0.338651	0.708186	0.917059	0.526871	1.19962	0.26698	2.15974	1.64026	1.06165	0.53879
ilvD	0.0415658	0.00479809	0.257239	-0.0292901	0	0.0284029	0.987053	0.235514	-0.316067	2.15931	0.910268	0.702527	0
nudK	0.10662	0.0654888	0.143777	0.27851	0.128779	0.194611	0.216018	0	0.790309	2.15451	0.752631	0.635781	0.135968
gsiA	-0.0336723	0.498635	-0.0200093	-0.122691	-0.0835338	0.466008	0.400983	0.145192	1.14875	2.14529	1.43395	0.0387741	0.0780729
entS	0.205967	0	0.449237	0.579521	0.536873	0.757792	0.653565	0.0674017	0.835102	2.14063	1.42245	1.24573	0.50141
thiC	-0.45535	-0.317054	0.240681	0.0975921	0.410033	0	1.04524	0.509975	0.332684	2.13646	1.51697	0.290305	0.69587
ugpC	0.347766	0	0.0788628	0.0748797	0.439493	0.297005	0.317276	0.205918	0.879203	2.13372	1.31382	1.05813	0.0405831
mdtC	-0.639303	-0.314109	-0.263335	-0.0972972	-0.315967	2.12029	1.44222	-0.353637	0.374556	-0.475199	-0.15724	-1.2909	-0.373815
cirA	0.0430304	-0.193278	-0.0942278	0.447532	0.249693	0.135677	1.68321	0.352157	-0.817581	2.11601	1.2221	-0.500145	0.463496
ybbM	-0.0621027	0.657908	0.200497	0.304824	0.670845	0.480088	0.836602	0.621546	0.279071	2.10692	0.790052	0.581436	0.267596
treF	-0.417969	-0.220159	-0.302061	-0.690545	-0.74825	-0.183686	-0.943507	-0.739366	2.09355	0.529752	-0.507774	-1.22319	-0.355867
gltP	-0.751101	-0.108862	-0.338473	0.726722	0.298645	0	1.37355	0.803716	-0.482265	2.09176	1.69024	-0.230667	0.311858
glcD	0.227036	0.197652	0.361927	0.208823	0.4982	0.591668	0.298438	0.636602	0.203499	2.08939	1.49812	0.894385	-0.32534
parC	-0.457312	-0.926253	0.00334281	0.337768	-0.107392	0.279818	0.11032	-0.442569	-0.140664	2.08134	0.474974	0.903214	0.0235
mhpR	0.446818	0	0.340507	1.17523	0.0149258	0.664943	0.591807	0.395948	-0.362682	2.07974	0.504861	0.389849	0.809755
mlrA	0.18739	0.700097	0.217008	0.168172	0.31236	0.382489	0.491321	0.135975	0	2.0763	0.886041	0.916595	0.202544
ygbI	0.132279	0.459839	0.38119	0.133632	0.644234	0.572642	0	0	0.0912712	2.07498	1.10619	1.00273	0.656425
menA	0.213986	0.594061	0.229578	0.721915	0.418117	0.290852	0.424074	0.532884	0.949626	2.07302	1.23358	1.05751	0.970756
yqcE	0.361804	0.306737	0.331271	0.247093	0.62537	0.560854	0.0735973	0.00292707	0.794497	1.43908	2.07226	1.25057	0.85671
ygfB	0.345323	0.622551	0.194632	0.992576	-0.00516128	0.402339	0.880861	1.13098	0.584432	2.07054	0.428882	0.868654	1.1236
yajO	0.020298	0.424819	0.191375	0.554808	0.32711	0.562225	0.149532	0.646594	0.325527	2.06946	0.41442	0.48027	0.265107
hybC	0.215453	0.652074	0.0886435	0.0464925	-0.144713	0.44149	0.406155	0.193759	0	2.06479	0.697252	0.0764724	0.231082
ybiO	0.748291	0.162145	0.00665752	0.283655	-0.500187	1.0834	0.0487963	0.36993	2.0643	0.249633	-0.30831	-0.342589	-0.0923918
ygiH	0	0	0.2422	0	0.388512	0.271073	0.423318	0	1.54162	2.06298	1.06622	0.288616	0
appC	0.0527465	0.560296	0.327008	0.194961	0.315078	0.0945043	0.262335	0.170277	0.107976	2.0588	1.06616	0.641346	-0.430174
selB	0.0895279	0.0290674	0	0.215172	0.460107	0.183057	0.360789	0.244473	1.67056	2.05514	1.14903	1.3175	0.560431
dusC	0.0127995	0.633716	0.547832	0.641039	0.885134	0	0.885466	0.304275	0.489895	2.05489	1.34096	1.14339	0.904224
ygjV	0	0.446418	0.45684	0.591491	0.631612	0.233309	0.299365	0.414988	0.310263	2.05305	1.49366	0.993795	0.203992
helD	-0.667244	-0.284546	0.455273	-0.0252973	0.704919	0	1.30813	0.928446	0.599621	1.97099	2.04916	1.95379	0.43543
rplU	0.721029	-1.59145	0	1	-1.32964	0	2.04605	-0.25634	-1.85008	-0.498787	-1.32305	0	-0.0215489
arcB	-0.0273598	0.354636	0.0435797	0.524469	0.467698	0.318158	0.0527543	0.350229	0.974031	2.04332	0.519673	1.41496	0.586861
ygfS	0	0	0.129563	0	0.0138464	0.00907279	0	0.461689	0.285524	2.03832	1.04522	0.967372	0
yfeC	-0.0909381	1.11806	0	0.591769	0	0.0694954	0.17298	0.393366	0.128942	1.14893	0.534064	0.313281	2.03628
ybl35	-0.170635	2.02645	-0.34098	1.51711	0.385087	1.40339	1.37897	1.19666	-0.0081542	0.380533	0.692206	0.907869	0.926484
yjeM	0.247167	0.693394	0.468406	0.545494	0	0.661147	0.508149	0.437349	0.494467	2.02555	1.32625	0.965163	0.575842
yjbT	0.255645	0.360239	0.955387	0.659091	1.16022	0	0.46004	0.580006	0.913903	2.02151	1.99278	1.90254	0.536772
bcsB	-0.0574953	0.618875	0.200731	1.43014	0.641783	0.324702	0.929037	0.519404	0.850319	2.01076	1.47544	0.703418	1.20584
ygfX	0	0.592261	0.0623782	0	0.501849	0.112369	0	0.0326032	0.969683	2.0077	0.755762	0.585597	0.497898
gntK	-0.42055	0.00210434	0.338436	0.270957	0.526366	0.317511	0	0	0	2.00524	1.03868	0.415873	0.0420127
ybhB	0.98237	0	0.452891	0	1.20255	0.505735	0	0	0.97356	2.00179	1.36284	1.09268	1.08379
treB	-1.13137	0.166651	-0.130813	-0.695418	-0.672379	-0.37891	-0.123882	-0.339149	-1.02261	2.00135	-0.29228	-0.167631	0.0380878
ybcF	0	-0.290752	0.297096	0.196625	0.372681	0.288991	0.730988	0	0.351624	1.99985	0.80983	0.781309	0.142647
yjeK	0.260326	0	0.00291971	0	0	0	1.99728	0.433593	0	0.146773	0	0	0.446103
yhhJ	-0.305891	-0.100038	0.0795952	1.19121	0.0665008	0.575972	1.03024	1.09604	0.0740799	1.99229	0.648349	0.0682313	0.611345
ynfD	0.147726	0.933267	0.432616	0.341229	0.40977	0.0595104	0.610741	0.647046	0.934588	1.98614	1.49991	1.39004	0.344273
fdrA	-0.598607	0.675243	0.148588	0.964582	0.165016	0.72891	0.858189	0.87924	0.53784	1.98348	0.917849	0.54451	0.529328
yhjA	-0.0830252	0.656112	0.368523	0.279371	0.385495	-0.253435	0.459687	0.624531	-0.0412698	1.98226	1.53073	0.151127	0.582919
fhuE	0.471053	0.662255	0.961393	0.0898921	0.372424	0.573395	0.871616	1.16719	0.813908	1.82559	1.25262	1.96946	0.635878
frlC	0.0664371	0.178661	0.102582	0.113205	0.0226483	0.237697	0.26977	0.00813443	0.436029	1.96227	0	0.47356	0.214552
ffh	0.21506	0.0178333	0.149744	-0.639824	0.578912	-1.0072	-1.1003	0.518873	1.95856	1.17867	0.0937821	0.254034	0.405586
rplC	-1.6522	0.389641	0.278847	0.0660061	-0.069699	0.114167	0	0.128891	1.95767	0	-2.69304	-1.93434	-0.649744
cmk	0.878106	-0.182864	-1.4216	0.0366707	0.385705	1.95723	0.282859	0.236673	0	-0.758992	-1.76296	0.505448	0.342392
pheP	-0.213469	0.648755	0.1359	0.165664	0.0257783	0.250475	1.36642	0.34672	1.95429	1.43106	0.711391	0.268238	0.345632
frlB	0.1658	0.40144	1.22679	0.385872	0.624069	0.321729	0.599548	0.762558	0.418234	1.95423	1.2225	0.955423	0.768261
iscR	0.230777	0	-0.369129	-0.203092	-0.96233	0	0	0	1.95346	-2.58099	0.224476	-0.811733	-0.47961
sad	0	0.270203	0	0.185797	-0.140595	0.0497913	0.576036	0.597812	-0.215135	1.95267	1.28898	0.68781	0.0460879
msrA	0	0.392149	0.22643	0.15735	0.419885	0.107885	0.430785	0.694148	0.725801	1.95074	1.185	0.62109	0.498081
nagZ	0	0.49178	0	0.100948	0.363785	0.771565	0.742774	0	0.420318	1.94434	0.552601	0.88259	0
yehL	0.19591	0.397642	0.378871	0.394921	0.638592	0.471966	0.637353	0.0226377	0.500899	1.94198	1.65576	1.0223	0.481372
yfdZ	0.111808	0.700666	0.505821	1.0173	0.0676937	0.921547	0.604312	0.779843	0.487219	1.94073	0.973976	1.24372	0.657728
nuoH	0.122756	0.490319	0.160875	0.0434952	0.417631	0.361184	0.517015	0.375756	0.182145	1.93932	1.42559	0.670863	0.361357
aslA	0.128972	-0.278066	0.145148	0.29135	-0.0390022	0.0212524	0.0634377	1.92766	0.157373	-0.864329	-0.227266	0.422698	0.237055
osmF	0.615889	0.437247	0.160483	0.297094	0.218016	0	0.614658	0.650358	1.54953	1.92035	0.784682	1.0699	0.206162
proX	0.436384	0.329833	0.0843489	0.546922	0.427315	0.722829	0.764045	0.337516	0.884242	1.9196	1.53796	0.948787	0.459054
yciC	0.355031	0.786886	0.0595443	0.450259	0.694313	0.73496	0.668739	0.821802	1.64767	1.55988	1.9171	0.434398	1.1391
rnr	-0.226841	0.149933	-0.11129	-0.0413408	0	0.266011	-0.501821	-1.29768	-2.30645	1.90878	0	0.249181	-1.31786
aes	-0.585976	0.83974	0.0327986	1.52851	0.0162135	0.713095	0.803665	0.816726	0.220395	1.90728	0.484715	0.992739	0
yhjJ	0.0873173	0	0.0321226	0.343534	0.0497805	0.402084	0.529952	0.371412	0	1.90086	1.06854	0.751054	-0.00394324
gmhB	0	-0.485266	-1.11559	-0.723482	-0.412645	0	-1.18396	0.0201779	-1.25163	-0.726	-2.42005	0	1.90064
hcp	-0.180614	0.547794	0.55798	0.266472	0.873233	0.623991	0.286789	0.253181	1.51686	1.89922	1.80322	1.19998	0.226207
mnmG	-1.03153	1.00129	0.40126	-0.00140101	-0.262197	0.453071	0.206416	1.8989	1.08276	1.22505	0.916666	0.923207	0.303624
ypeC	0.219569	0.475262	0.218689	0.262968	0.563413	0.658538	0	0.190263	0.0884292	1.89774	0.862022	0.384439	0.396446
yjbH	0.563631	0.173615	0.15077	0.109955	0.111438	0.734574	0	0.0339297	0	1.89627	0.883441	0.271131	-0.361299
xylH	-0.872425	-0.121056	-0.336245	0.162893	-0.00241365	0.64014	0.151095	0.032883	0.41086	1.89431	0.977697	0.59967	0.792786
malS	-0.533491	0.87069	0.144559	0.406247	0	0.0338002	0.324473	0.107162	1.15499	1.89353	1.41809	0.854197	-0.0765968
rob	-0.575973	-0.463695	-0.34125	-0.204441	0	-0.368895	0	-0.346312	1.88495	0	-0.267398	0	-0.0799458
gutQ	0	0.262008	0.540481	0.338077	0.762848	0.147566	0.269783	0.73822	1.05801	1.88163	1.85056	1.28084	0.305803
ybjT	0	0.751036	0.45585	0.175524	0.222913	0.507456	0.853429	0.337151	0	1.87851	0.323407	1.0214	0.400428
mdlA	-0.137895	0.337185	0.281785	0.417415	0.284033	0.0264513	-0.00536569	0.00131906	-0.238468	1.86926	1.02343	0.205758	0.158408
livK	0.408042	0.179047	0.367969	0.804723	0.339597	0.219924	0.0543314	0.639142	0.411431	1.86671	1.32807	1.08132	1.41262
scpA	0.122676	0.110761	0.0980272	0.534912	0.11715	0.162596	0	0.668875	1.86198	1.73196	0.468792	0.503204	0.0432109
yahJ	-0.142447	-0.0707125	-0.0691591	-0.377669	-0.17969	0.253314	0	0.15027	-0.0889666	1.86168	1.23928	0.232045	0.258234
ynjB	0.244028	0.736697	0.188516	0.14941	0.74484	0.633081	0.666002	0	0.653718	1.86149	1.78225	1.48951	0.648291
mgtA	-0.281822	-1.12997	-0.357345	0.387622	0.103717	0.52527	0	0	0	1.86026	0.920929	0.0177225	0.605332
yhbU	0.242741	0.630395	0.357906	0.235771	0.507906	0.301993	0.581386	0	0.754217	1.85986	1.0022	1.58394	0.778201
yagX	-0.632698	-0.11378	0.041307	0.697506	0.26609	0.146704	0.225639	0.0847784	1.85487	1.57117	1.2754	0.379969	0.127539
gudX	-0.183295	0.733747	0.209769	0.858982	0.285601	0.682564	0.699977	1.33519	0.897488	1.85433	1.28866	0.582309	0.933525
fadB	-0.301668	0.245686	0.302714	0.309689	0.250304	0.309289	0.209283	0.00215766	0.440748	1.8519	1.34977	0.240963	0.470484
amiA	0.833185	0.888288	0.72118	0.292018	0.535362	0.694767	0.798392	0.0828306	0	1.8517	1.1989	1.00101	0.428709
ydiJ	-0.179348	0.728447	-0.0728169	-0.788494	-1.05908	0.10717	-0.298742	-0.263119	1.84663	-0.0298863	0.207673	-0.972148	0.160319
flhB	0	0.000938988	0.288579	0.20792	0.240633	0.340954	0.354953	0.0142797	0.449194	1.84549	1.69773	0.759948	0.165932
yifN	0.20964	0.720456	0.328453	0.548449	0.3433	0.173556	0.0351044	0.375619	0.544636	1.84265	1.20184	0.719561	0.500652
torZ	0	0.776798	0.312017	-0.0626088	0.166496	1.24452	0.438056	-0.965015	0.937596	1.83614	-0.0681123	0.759613	0.236306
wcaC	0.470695	1.3937	0.374349	0.805546	1.05006	1.14079	1.04765	1.06576	0.517876	1.83218	1.6606	1.46272	1.13729
argE	0	0.233733	-0.0540323	0.271401	0	0.0526558	0.200273	0.503969	-0.395257	1.8308	0.489143	0.742567	0.0620353
hfq	-0.40226	-1.10664	0.0907124	0.0445471	0.84704	-0.165859	-0.0705733	0	0.280972	1.82963	0	0.684522	0.559279
yhcM	0.431921	-1.09652	0.514545	0.388839	1.04923	0.422848	1.8294	0.253851	0	1.32178	1.67678	0.923269	0.443246
yfeO	0.603454	0.704358	0.452702	0.844193	0.669054	0.838863	0.754017	0.746476	0.713702	1.82825	1.376	1.22432	0.918099
yjjL	0.14382	0.320219	0.109081	0.173978	0.591735	0.601286	0.19245	0.682582	1.10831	1.82079	1.13628	0.818853	0.30124
aidB	-0.363326	0.0388257	0.250446	0.309053	0.197541	0.444209	1.03768	0.651663	0.0044582	1.82076	0.766452	1.31223	0.274927
asmA	-0.152528	0.824213	-0.096858	0.0371993	0.49252	0.525178	1.3717	0.118369	0.560362	1.81907	0.770715	1.45251	0.380586
uvrB	-1.8971	-0.611654	-0.452311	-0.618129	-0.588871	-1.72247	-1.07861	-1.68042	1.8172	1.37013	1.27144	0.381149	-0.894647
rseB	-0.230687	0.332867	-0.195302	-0.207547	-0.0432854	0	0	0.00899164	1.81674	0.367753	0	0	-0.281917
yihG	-0.191367	1.23569	0.0932768	0.728196	-0.2534	1.81654	1.38082	0.584963	0	-0.358347	-1.24809	-0.879337	0.564785
rhlB	0.2003	-0.151682	0	0	-0.282038	-0.194994	0	-0.118145	0.0739293	1.81627	-0.0210192	0.0511709	0
proP	0.492777	0.467173	0.0946162	0.56183	0.1789	0.411698	0.547992	0.0657667	-0.32939	1.81504	0.117507	-0.0563031	0.286525
ftsP	0.382027	1.10351	0.123855	0.51479	0.484358	0.930422	0	-0.0091839	-0.287502	1.81157	1.3827	1.34762	0.347593
ssnA	0	0.295452	0.187455	0.91472	0.368126	0.772473	0.602409	0.379094	0.410584	1.80926	0.807031	0.750155	0.501903
cpxP	0	-0.00513821	0	0	0.234883	0.157364	0.751423	0.0245446	0	1.80747	1.13528	0.288044	0
kefC	0.273171	0.517227	0.321287	0	0.335437	0.53933	1.13489	0.611929	0.266763	1.80522	0.883177	0	0.149439
garL	-0.107045	0.140132	0.189963	0.146677	0.0561105	0.346821	0.0198297	0.358625	0.306297	1.80098	0.773517	0.795145	0
yrfF	-0.133504	0.393413	0.151588	0.857145	0.380555	0.575196	0.95227	0.528048	-0.177981	1.80081	0.889188	0.110948	0.738399
glvA	0.130499	0.165102	0.0981701	0.25457	0	0.57302	0.549381	0.543317	0.091149	1.79878	0.4066	0.340734	0.727486
tsr	-0.173133	-0.281796	-0.00987629	0.368695	0.368952	0.377197	0.0933731	0.327224	1.36534	1.7944	0.206314	0.896868	1.05522
ygcP	0.238293	0.367401	0.354682	0.912444	0.452103	0.758778	0.833032	0.735913	0.543519	1.79349	0.49849	0.57268	0.644424
yhcB	0.130702	-0.212264	0.784594	-0.0229336	0.380283	0	1.31925	0.372911	0.772518	1.79312	0.719556	0.818715	0.670192
zntA	0.57416	0.508315	0.271552	0	0.7925	0	0.232933	0.277595	0.574698	1.78943	1.76732	1.57184	0.248538
hofM	0	-0.0389282	0.19113	0	0.212005	0.039988	-0.00787049	0.0263355	0.0945721	1.78898	0.48495	0.767628	0
argK	-0.0845398	0.155228	0.20058	0.439531	0.323365	0.245988	0.778721	0.690289	0.257261	1.78424	0.676053	0.223427	-0.0479556
fecD	0	0.325368	0.340206	0.195519	0.533997	0.103206	0.229223	0.421544	0	1.78294	1.14545	0.918387	0.141792
narK	-0.201007	1.02021	0.436579	0.665213	0.628718	0.557054	0.880339	0.537733	1.33216	1.78261	1.66841	1.11058	0.759927
garK	0.0099574	0	0.175912	-0.166324	0.242792	0.510608	-0.0211125	0.164475	0.35782	1.78101	0.320983	0.327146	0
yjfC	-0.0608403	0.471753	0	0	-0.0808074	0.624825	0.40591	0.236601	0	1.77783	0.270744	0.120193	0.284682
aslB	0.180439	-0.624148	-0.111136	1.77631	-0.604441	0	0.150822	0	-0.320477	-0.709957	-0.956182	-0.432614	0
gapA	0.285517	-0.670365	-0.117091	0	0.830257	-0.973903	-1.282	0	0.00601064	1.77628	0.826777	0.0574879	-0.581494
eutH	-0.155554	0.0155535	0	0.0854336	0.659214	0.44597	0.69896	0.173313	0.454356	1.77616	1.33312	1.07975	0.7072
dld	-1.01502	-0.100654	-0.0899661	0.521394	0.0528797	0.37811	0.846547	0.568916	0.190764	1.77558	0.996591	0.54464	0.640145
glnA	-0.263656	0.653807	0.333301	1.00204	-0.100769	0.317009	1.28013	0.215388	-0.115052	1.77252	0.426685	0.459709	0.753553
ydiF	-0.049788	0.82416	0.489497	0.165239	0.302226	0.488695	0.286669	0	0.730992	1.76827	1.48202	0.789497	0.579885
livF	0.290264	0	0.0532392	0.556326	0.265342	0.340551	0.277896	0.64251	0.20292	1.76661	1.13823	0.623873	0.742725
nadR	0.103389	0.72303	-0.184334	0.416444	-0.17359	0.0704873	0.488623	0.0631173	0.228268	1.76135	0.617914	0.587836	0.116089
cyaA	-1.23729	0	-1.25326	0	-1.09472	1.69744	1.75633	-0.0395284	-1.63326	-1.16109	-0.580097	1.72365	-0.0428168
acs	0.0185451	0.490452	0.456265	0.788086	0.551709	0.449303	1.17497	0.742526	1.58648	1.7555	0.326971	1.24757	1.23304
katG	0.197921	-0.537723	0.371954	0.093839	0.354385	1.02146	0.288622	0.36979	-0.298722	1.74967	1.16063	0.405815	0.0895755
ybaB	-0.749275	0.205702	0.355314	0.370609	0	0.403445	0.243848	0.290987	0	1.7491	0.496182	0.503576	0.357
ivy	-0.020032	0.0778155	0	-0.0565893	0	0.228448	0	-0.110064	0.187127	1.7482	0.155555	-0.220861	-0.286973
malF	0.14992	0.1017	0.45851	0.450856	0.322542	0.102226	0.23376	0.56148	0.747625	1.74683	1.20102	0.384814	0.0362533
sucC	0	0.520157	0.389731	1.24406	0.235441	0.921937	1.74379	0.355612	0.444728	1.39593	0.824638	0.81722	0.75486
pdxY	-0.575633	0.0386027	0	0.2805	0.00612457	0	0.504736	0.0360711	-0.0126711	1.73786	0.476301	0.285881	-0.154776
yeaL	0	0	0.0271778	0	0	0.292049	0	0	0	1.73767	0.0309794	0.0600541	0
ygbN	0.0288343	0.331128	0	0.170304	0.0290239	0.00878003	0.230555	0.172894	0.46905	1.73743	0.925712	0.474393	0
mdtK	0.129483	0.0128671	-0.372865	0.107122	0.1619	0.901885	0.354161	-0.149218	-1.43087	1.7367	0.639584	-0.542694	-0.300913
ybl128	0.0926909	-0.274124	0.434404	0.108016	1.43821	0.0724268	-0.0970395	0.203894	0.667525	0.0941633	1.03331	1.73423	0.693521
phoB	-0.0901955	0.654182	0.280097	0.549256	0.406837	0.529554	0.382991	0.257616	0.13643	1.73313	1.09289	0.839066	0.0104893
ddpX	0.55942	0.864891	0.365475	0.49207	0.588865	0.939425	0.687294	0.368299	0.752308	1.73191	1.01346	1.22401	0.52289
ftsZ	-2.13811	1.73141	-0.577716	0.725825	1.2076	0.621488	1.26534	0.469485	-1.12425	-0.652077	-1.65605	1.53222	0.449307
pepN	-0.466155	0.269328	1.3777	1.17949	-0.954748	0.349117	1.73098	0.0976274	0	0.645523	0	0.0465368	0.207326
yliF	-0.453228	-0.343531	-0.325919	-0.134592	-0.424611	0	-0.137973	1.72777	0.756923	0.858581	0.219933	0.334284	0.774503
potB	0.35454	0.436889	0.16714	0.451387	0.042573	0	0	0.359044	1.38653	1.72162	1.39915	0.924054	0.102547
zraS	0.0484128	0.43731	0.0778761	0.699839	0.114213	0.157172	0.50229	0	1.13937	1.71958	0.786008	0.347992	0.0535786
gspB	0.554326	0.114003	-0.306007	-0.260465	-0.313849	-0.505402	0	0.621541	-0.47491	-0.776049	0	-0.818439	1.71694
yigL	0	0.314109	0.254171	0.139145	0.521274	0.369972	0.352426	0	0.044996	1.71343	0.815418	0.237682	0.564785
dppD	0.305058	0.338559	0.0447041	0.273422	0.55145	0.0376478	0.00319592	0.360673	0.681225	1.71243	0.592985	0.926205	0
ydeA	0	0.0762299	0.182205	0.158688	0.545924	0.210491	0.166569	0.500019	0.564173	1.71034	0.341121	0.0351123	0.892845
kdpA	-0.511027	0.574142	0.170975	0.514173	0.3816	-0.19159	0.500427	0.0891697	0	1.70995	0.816345	0	0.483843
aer	0.286534	0.190464	0.123221	0.219464	0.416519	0.785742	0.466064	0.254993	0.423037	1.70777	0.734753	1.02171	0.340012
fldA	-1.96331	-1.09357	-0.596899	-1.66359	0.312227	-1.79701	-1.15316	-0.364054	1.70518	-2.07058	-1.26719	0	0
ybhS	-0.1772	0.307073	0.126488	0.420212	0.146062	0.403978	0.190483	0.145549	0.377001	1.70322	0.75335	0.68311	0
ptrB	-0.460452	-0.966393	0.103139	-0.081988	-0.0976264	-0.0389315	0.864287	0.351978	0.941201	1.7029	1.63523	-0.119384	-0.43102
ycbR	0	0	0.37192	0.032056	0.231283	0	0.820944	0.269999	0.57125	1.7014	0.921768	0.47862	0.0964306
yqjG	0.056865	0	0.445991	0.449493	0.545485	0.104446	1.10197	0.499806	0.935577	1.70101	1.55265	1.06452	0.0170112
araC	-0.176083	0.343256	0.0378253	0.623186	0.191506	0.10867	0.165944	0.477351	0.506197	1.69964	1.22804	0.201199	0.152077
yhbO	0.126774	0.169089	0.176891	0.164312	0	0.182475	0.109637	0.569798	0.424898	1.69829	0.521317	0.637132	0
serW	0	0.985953	0	0	-0.00874875	0	1.69293	0.864155	0	0	-0.0244377	0	0.0376485
topB	0.0809219	0.339774	0	0.534799	0.113505	0.678912	1.08423	0.781028	0	1.68862	0.884417	0.523434	0.466962
galR	0.139153	1.05666	0.365822	0.694523	0.496013	0.820666	0.931015	0.750749	0.358195	1.68776	1.41194	0.934306	0.0799482
pgi	0.140603	0.022048	0.0232502	0.295852	0.616913	0.609806	0.397811	-0.499478	-0.272763	1.68463	1.31502	0.799715	0.282328
yliE	1.06835	0.696012	0.286383	1.32393	0	1.68151	1.41417	0.319128	-0.746957	0.933444	0.751932	0	0.932957
nirB	0.287324	-0.401017	-0.0956999	1.67733	-0.849229	-0.275007	-1.94939	-0.748938	-1.17275	-0.256646	0	-0.10606	0.690316
ygjQ	0.291877	0.669808	0.392154	0.356058	0.47238	0.453166	0.0550682	0.178325	0.269528	1.67693	0.514298	0.401918	0.336362
ilvB	0	0.317587	0.270469	0.175183	0.124388	0	0.320041	0.253876	-0.655697	1.67495	0.228139	0.604255	0
rbsA	-0.0702784	1.30536	0.372303	0.597907	0.0986239	0.185302	0.902562	0.0959116	1.66772	0.020737	0.415863	0.965805	-0.206932
putP	0.542272	0.189435	-0.272156	0.559293	0.187971	0.949876	1.66685	0.821953	0.498221	1.51532	1.49121	0.304735	0.573016
hyfJ	-0.0908494	0.102251	0.147938	0.193704	0.414578	0.0762039	0.1208	0	0.198761	1.66631	0.62954	0.729181	0.183662
mdtD	0	0	-0.134799	0.336361	0.305089	0.565574	0.941239	0.247028	0.746262	1.66461	1.02835	0.415478	0.516347
yiaM	0.000467058	0.351432	0.240925	0.37475	0.64562	0.104605	0.164189	0.404056	0	1.66401	0.674618	1.1938	0.558525
clcA	-0.121226	0.310363	0.0108061	0.346759	0.276938	0.189163	0.127021	0.655412	0.177372	1.66233	0.600268	0.574172	0.416428
flgC	0.0549924	0	0.34062	0.00176051	0.437497	0.278118	0	0.851276	0.368402	1.66205	1.22148	0.77639	0.448426
mutL	-0.135627	-0.73446	-0.263084	-0.584842	-0.139749	0.787544	0.0564718	-0.987422	1.66157	0.298341	-1.00231	-0.514793	-0.860498
fhuB	-0.0517333	0.132548	0.0928352	0.407584	0.159291	0.507372	0	0.237556	0.746262	1.65473	1.44742	0.757667	-0.275785
fhuD	0.50336	0.286314	0.205235	0.297833	0.578125	0.537461	0.203298	0.736557	0.300113	1.65032	0.665566	0.705331	0.279776
rmuC	-0.296619	0	0.0312056	-0.0463807	0.72085	0	0.464986	0	0.308841	1.65021	1.14458	0.688175	0.65005
ltaE	0.15507	0.429304	0.053025	0.335152	0.431741	0.21002	0.338979	0.211266	0.403483	1.29567	1.64916	0.48443	0.148857
ygcF	0.952278	1.08844	0.643254	-0.431716	-0.190954	1.04891	0.107803	0.311944	0.888133	0.775345	1.64584	-0.0403577	1.29177
proQ	-0.471199	0.0287669	-0.189159	0	-0.529138	-0.0945541	0.476907	0.359581	1.64044	-0.251127	-0.344946	-0.915851	0.186847
dhaR	-0.674442	0.106692	0.112361	0.317011	-0.0144658	0.169427	0.20094	-0.214462	0.594624	1.63395	1.15613	0.646197	0.760184
ycgV	0.0262783	-2.23349	0.402246	0.568284	-2.06542	0.463947	0.107803	1.63387	-2.28179	0.190382	-1.22862	1.18203	-0.708234
gatD	-0.374099	0.285345	0.129674	-0.375971	0.424403	-0.099538	-0.0579931	0	0	1.62993	0.990441	1.23125	0.344297
ybl147	-0.190676	0.193868	0.0773459	0.733314	0.666154	0.51115	0.13907	0.299435	-0.205105	1.6279	0.977515	0.477995	0.149069
ftsH	-0.272133	-1.30325	0.38666	0.105239	-0.434251	0.793383	1.62688	0.348899	-0.857583	0.489118	0.989059	-1.07161	0.732399
yfaA	0.245386	0.747574	0.174052	0.655452	0.43627	0.524288	0.52411	0.258719	0.456401	1.62594	0.967291	0.717249	0.134779
yccA	0	0	0	0.0252305	-0.159438	-0.0738952	0.542199	0.130085	-0.224547	-0.983848	0	-0.517439	1.62567
ygjG	-0.164047	0.645323	0	0	0.120935	0.0912652	0.0948236	0	0.399504	1.62553	0.461868	0.527749	0.283276
lamB	0.676228	0.607451	0.431482	1.14664	0.838808	0.159783	0.393318	0.997199	0	0	1.62326	1.44648	0.0219855
xdhA	-0.823083	0.0563036	-0.174058	0	-0.0422393	0	0.0231774	0	0.0695643	1.31381	0.232431	1.62306	0.0657523
hemL	-0.0701968	0.295021	0.214229	-0.0188069	-0.0141575	0.180733	0.891389	0.413835	-0.0427628	1.62295	0.397631	0.148966	0.120584
ygcN	0.411336	0.218891	0.0274767	0.140707	0.264441	0.47513	0.711488	0	0.0601661	1.62083	0.128853	0.218206	0.39024
yfaW	0.0364598	0.105927	0.159072	0.38054	0.117076	0.392652	0.189466	0.258581	0.54736	1.62025	1.18314	0.586198	0.123753
yigB	-0.118777	0.35379	0.360774	0.30273	0.28534	0.00112195	0.518264	0.107276	0.867083	1.61774	0.335351	0.838226	0.0725641
degS	-0.0649948	0.363187	0.0917785	0.270699	0.0278181	0.389763	0.366671	0.46764	-0.0954689	1.6142	0.696224	0.548987	-0.3929
chaA	-0.318004	0.769635	-0.151385	0.321873	-0.0447797	0	0.842356	0	0.532815	1.61155	0	0.132677	0.724669
torA	-0.277709	-0.36725	0.475114	0.423388	0.526985	0.0858164	0.183906	0.498197	1.22215	1.61005	1.17415	0.860411	0
ybiB	-0.101485	0	0.411437	0.0459139	0.446872	0.346924	0.146299	0.783601	0	1.60838	0.959452	0.979818	0.854099
pqiA	0.0245662	0.0938075	-0.0558126	0	0.0665297	0.0663858	0.538897	0.102404	1.02504	1.60811	1.38669	0.540702	0.363349
ulaE	-0.612247	0.498861	0.100206	0.0302845	0	0.616753	0.337578	0.438363	0.455129	1.60078	0.25898	0.013653	0.936404
mdlB	0.0665582	-0.0907985	0.110274	0.463545	-0.177032	0.824744	0.237702	0	0.0665642	1.59952	0.077152	-0.0844135	0.394316
sodC	0.0391884	0	0.204165	0.194152	0.197635	0.297411	0.502233	-0.054295	0.0790602	1.59638	0.965224	0.740438	0.238053
mdtL	0	0.054293	0.188186	0	0	-0.12831	0	0.126075	0.415062	1.59629	0.604234	0.756434	0
rrfF	-0.31245	0.565597	0	-0.143985	0.148702	0	0	-1.05889	1.5953	0.404507	-0.582707	-0.382136	-0.893985
ycdT	1.21074	1.59455	0.478808	0.0746483	0.00346481	0.0649537	0	-0.407273	-0.487838	-0.277585	0	-0.356861	0.861954
glmS	0.247033	0.0511276	0.415622	0.311345	0.156863	0.266893	0.578557	0.048528	0.802153	1.59167	0.405152	0.938923	0.479978
gadC	-0.542288	0.0348735	-0.45061	-0.366175	-0.033022	-0.0244412	0.132266	-0.464635	1.59139	1.06183	0.0888164	0	-0.0746525
cpdB	-0.0647347	0.0507168	0.133051	0.785607	0.0688762	0.374097	0.923027	0.0973218	0.847581	1.59037	1.36767	0.671345	0.396314
mgsA	0	0.190936	0.388908	0.112787	0.533342	0.835218	0.128049	0.892115	0.422668	1.59012	0.820266	0.583408	0.439722
eda	-0.221229	-0.128793	0.288172	0.344224	0	0.1145	0.0513135	0	-0.0178069	1.59011	0.463544	0.303991	0.260851
pepQ	0.33532	-0.0506143	0.289	0.169233	0.0489819	0.0310431	0.271821	0.646309	0.952529	1.58483	0.928254	0.400999	0.352714
ydfR	0	1.58326	0	0.402452	0	1.53057	0.645516	0.829216	0	1.11543	0.683192	0	0
ybl194	0.11283	0.475275	0	0.39618	0	0.49176	0.11731	0	0.354376	1.58309	1.21566	0.553232	0.50854
cysD	0.12826	0.683163	0.110624	0.103248	0.365585	0.128916	0.628211	0.308932	0.296609	1.58113	1.21233	1.02207	0.118981
ygcE	0	0.891713	0.203094	-0.179806	0.215883	0.0509457	-0.0237544	-0.130761	0.113747	1.57947	0.367615	0	0.0348243
ybl136	0.499583	0.509937	0.230177	0.224768	0	0.403296	0.62758	0.419192	1.02427	1.57742	0.840491	0.858456	0.335303
mrcB	-0.111967	0.671046	0.217417	0.379886	0.475895	0.907067	1.41941	0.462582	-1.83867	0.586947	0.65898	1.57696	-0.557595
yjcC	-0.198825	-1.24159	-0.394076	-0.491534	0.214288	0	-0.107509	0.452077	1.57646	-0.410124	0.571929	0	-0.134358
secD	0.0262783	1.57386	0.264743	0.568284	-0.650386	0.463947	1.1078	1.31194	-0.281792	0	-0.813587	0	0.291766
yifK	-0.159944	0.215679	-0.00759801	0.179671	0.327578	-0.611556	-0.365772	1.56808	0.763655	1.17568	-0.909719	-1.01393	-0.0208455
sufS	0.229175	0.209398	0	0	0.350954	0	0	0.518848	0	1.56747	1.01694	0.738802	0.160619
lrhA	0.614799	-1.1304	-0.954092	0.671377	-2.54729	1.56704	1.2109	0.415037	-1.1787	-0.706524	-0.710493	-1.52223	0.39486
ynjA	-0.146219	0	0	0.0269328	0	0.339774	0.464306	0.401126	-0.214009	1.56538	0.508537	0	0.13628
rrmA	-0.15382	0	-0.0892492	0	0.0359604	0	0	0.0357379	0	0	1.56322	-0.244211	0
rppH	-3.84706	-0.462972	-0.43867	-0.983126	0.190522	0.4975	0.556393	-0.239466	1.55912	0.638972	-1.78003	-0.591768	-1.25964
ybl118	0.174852	0.465777	0.268495	0.362163	0.0668518	0.61952	0.504843	-0.0611288	0.77035	1.55812	1.47247	1.04213	0.387059
rpoD	-1.92952	0.302563	-0.603595	-0.0655883	-1.28426	-1.16993	-0.526069	-0.321928	0.543768	1.55651	-1.8625	-0.937264	-1.34211
tufA	-0.163259	-0.510799	-0.0857975	0.156438	-0.449883	-0.00328411	0.523201	0.391728	1.55426	-0.446827	-0.176223	-0.85365	0.102103
prpR	0	0.106648	0.314357	0.354198	0.296083	0.141371	0.37508	0.0256687	0.397988	1.55367	0.800612	0.755433	0
tgt	0.0900438	-0.443899	0.0208453	0.172836	0.447256	0.571686	0.348567	0.104846	0.928696	1.55358	0.211332	0.409276	0
ybl34	-0.0659132	1.49462	0	1.49333	0.252838	1.28401	0.953923	0.588673	0.297127	0.550568	0.474657	1.55127	0.767223
sufE	0	-0.0167504	0.194383	0	0.126298	0	0	0	0.555802	1.5512	0.699477	0.376533	0.194624
nagE	0.0101586	-0.344283	0.00170824	-0.794286	1.55038	-0.38405	-2.06212	-0.857981	-0.549034	-1.2791	-0.236508	0.680488	-0.549379
exuR	-0.438018	0.22414	0.293366	0.529722	0.386637	0.832474	0.927451	0.0230883	0.483779	1.55023	1.50616	1.5078	1.0455
aceK	1.05952	0.819478	0.301491	0.627682	0	0.5026	0.342442	0.0614615	0.494358	1.54664	0.878487	0.719207	0.70881
poxB	0.0154147	0.120924	0.20618	0.079815	0	-0.215264	0.190483	0.208031	0.432782	1.54658	0.771871	0.231732	0.0632507
pulE	-0.186177	0.147613	-0.0610868	0.452271	0.266357	0.614829	1.54531	-0.146021	-0.134143	0.750213	0.484803	0.208261	-0.198892
nagC	0.221102	-0.166497	-0.205544	0.0830651	0.457416	0.397764	1.54382	0.657378	-0.869102	1.08392	0.561135	0.579578	0.602713
ybl127	-0.580861	-0.18579	-0.120561	0.66815	1.04322	-0.0169887	0.139005	0.0354935	-0.250971	-0.0841893	0	1.54353	0.849022
ansP	0.624404	0.474087	0.0383837	1.21922	-0.979819	0.253229	1.23042	1.54187	0.230798	1.14361	0.301455	-1.83604	0.942702
hcaB	-0.0116805	0.126104	-0.0643279	-0.0696841	0	0	0.00643399	0.0872213	0	1.54091	0.448383	0.354453	0.123878
lipA	0	1.34899	0.0852148	0.744002	0.0553429	1.54088	1.32241	0.967867	-0.865783	0.23628	0.445686	0	-0.211885
mepA	0.858902	0.437372	0.133676	0.95581	0.165376	0.197358	0.0209708	0	0	1.54047	1.42	1.45974	0.26052
ompF	-0.550152	-1.14896	-0.0952079	-0.932145	-0.369693	0.256	0.607375	-0.688485	1.53971	0.868729	0.729716	-0.114565	0.583819
gltI	0.0756987	-0.385976	-0.180777	0.334168	-0.601109	0.51966	0.575372	0.0644484	0.03026	0.134824	-0.312745	-0.539413	1.53926
pdhR	0.00810418	0.565077	-0.0422512	0.690987	-0.169446	0.369658	0.729037	0.376151	1.53915	0.915876	0.154559	0.539781	0.612867
leuA	0.341312	-0.240357	0	0.228987	0.048272	0.175595	0.143585	-0.061016	1.53824	1.01798	-0.269074	-0.0912866	0.113427
aaeB	-0.956687	-0.664459	-0.238639	-0.108142	-0.880709	-0.522468	1.53761	0.274629	0.797258	-0.21156	-0.977875	-0.454657	-0.279379
gudP	-0.0193406	0.611795	0.137489	0.159712	0.221114	0.590647	0.373315	0.863108	0.90603	1.53623	0.778903	0.513715	0.0226647
ybl95	0.535196	0.618735	0.169617	0.173524	0.144913	-0.576903	0	0	-0.857836	-0.111419	0.361354	1.53575	0
yihR	0.240722	0.0264764	0.157132	0.219495	0.0793099	0.329078	0.496518	0.150997	0.161414	1.5352	0.805372	0.361399	0.277331
dcrB	0	0.0597457	0.225697	-0.006521	0.255424	0.315309	0	0.0205779	0.400518	1.53513	0.600765	0.360177	0.142452
rpsU	0.614799	1.53257	-0.146737	0.0864148	0.774636	-0.0179219	-0.374066	0.830075	-1.1787	-0.706524	1.40498	0.0627358	-1.1901
yccM	-0.662439	-0.362264	0.0303572	0.387843	-0.274525	0.518396	-0.401684	0.188115	-0.413209	1.53216	0.195631	0	-0.174977
yphF	0.00271819	-0.0898384	0.0071346	0.26534	0.275529	0.492613	0.571664	0.114942	0.516836	1.52533	0.687749	0.613397	0.243289
nuoC	-0.597048	0.327259	0	0.501568	0	0.333499	0.26838	0.552817	0	1.5247	0.130951	-0.00356305	0.427164
atpI	0.529222	0.938995	0.924241	-0.0389056	0.641585	0.343971	1.20768	0.0821306	0.731956	1.52415	1.10551	1.30458	0.398401
eutC	0.214755	0	0.116023	0.00659326	0.44603	0.223566	0.357909	0.412963	0.470698	1.51947	1.27733	0.826799	0.434363
ybl78	-0.605892	0.23427	0	-0.433611	0	0.254582	0.230492	0	-0.385027	1.51905	0.702078	0	0.108286
hyfI	0	0.168856	0.235749	0	0.406054	0.578102	1.51855	0.707185	0.718658	1.36472	1.23131	0.46598	0.27219
lepA	0.213637	0.657276	0.570902	0.913413	-0.586014	0.130394	0.336559	0.268754	-0.851962	1.51803	0.93421	0.216961	0
torS	-1.43955	0.517513	0.373649	-0.249737	0.0293785	-0.159086	0.623116	-0.0654343	0.378628	1.51793	0.72004	0.913366	-0.2806
nudC	0.0236007	0	0	0.197986	0.0560727	0	0.450026	0.471036	0	1.51699	0.781205	0.11438	0.582515
mdtF	-0.192556	-1.71536	0.367836	0.0864148	-0.810326	0.567041	0.625934	-1.16993	-1.76366	-2.29149	1.5119	-3.10719	-1.1901
yiiG	0.0848391	0.522699	0.209296	0.2099	0.266503	0.512095	0.193832	0.327011	0.200253	1.51142	0.594238	0.879336	0.00940606
mdoG	0.0507618	0.189575	0.41506	-0.0606005	0.1615	0.386749	0.398531	0	0.491559	0.61021	0.661806	1.51042	0.524184
hisR	0.429582	0	0.0280567	0	0	1.05429	1.5096	0.48725	-1.16345	-0.492868	0	0	-0.135235
yiaN	0.276926	0.0181479	0.22251	0.144984	0.201664	0.682259	0	0.243194	0.593668	1.50955	0.958838	0.424335	0.0881764
visC	-0.0617904	0.0249451	0.047591	0.153002	0.246702	0	0	0	0.139211	1.50809	0.291616	0.531634	0.0797862
intR	-0.260357	0.748352	0.227914	0.172058	0.218095	0.654016	0.521613	0.901639	0.319885	1.50673	0.534608	0.0715186	0.853583
araA	0	0.181292	0	0.213249	0.0190242	0.471304	1.50514	0.117923	0.165615	1.00536	0.664468	0.692616	0.733564
yjjN	0.305981	0.766358	0	0.104886	0.0329481	0.341107	0.54872	0.353074	0.297176	1.50398	0.767135	0.264741	0.168771
carA	-1.10002	0.0344269	-0.0326188	0.226949	-0.366733	0.512412	0.474712	0	-0.0666574	1.50371	0.334279	0.612774	0.131233
fic	0.852833	0.889576	0.529556	0.578306	0.0241994	1.02297	0.817199	0.031469	1.09956	0.918277	1.49996	0.982588	0.88611
cheW	-0.123275	0.530374	0.467428	0.208592	0.294859	0.442154	0.270744	0.552372	0.595849	1.49745	1.05998	0.920419	0.942022
wza	0.252993	0.0742399	0.27454	0.120334	0.262113	0.539801	0.0162689	0.563941	1.49553	1.26817	0.993337	0.588164	0.493317
yijO	0	0	0.1248	0.146375	0.117103	0.0473564	0.456954	0	0	1.49519	0.507305	0.553055	0.403189
ibpA	0	0.418264	0.150039	0.0531288	0	0.143965	0.0768398	0.101325	0.892251	1.49176	0.0264181	0	0
rihA	0.130688	0.321146	0.162916	0.417483	0.276989	0.360987	-0.196933	-0.0954951	0.706473	1.49066	0.69514	0.01962	0.124933
hycC	-0.23326	0.547282	0.0552489	0.0806759	0.130279	0.414254	0.672917	0.240574	0.773035	1.49059	0.671003	0.516128	-0.0203284
sseA	0.232665	0.157382	0	-0.0165285	-0.139863	1.49057	-0.000455494	0.216614	0.235201	0.17187	0.144434	0	0.186365
nrfF	0	0	0.192448	0	0.462503	0.329232	0.375272	0.144178	0.761429	1.48933	0.735562	0.548116	0.6383
yqjA	0	0	0	0.0346571	0.318598	0	0	0.512511	0.262637	1.48691	0.897537	0.127108	0
ybhU	-0.147327	-0.210698	0.287535	0.938999	-0.332138	1.48674	-0.328836	0.875304	-0.259	-1.6613	0.879056	0.461602	0.662481
yghE	-0.0688277	0	0	0	0.20491	0.117236	0	0	0	1.48174	0.638958	0.441836	0
nuoA	-0.448356	0	0	-0.320068	-0.186977	0.103917	0.0811061	1.48023	-0.202964	-0.974661	0	-0.713684	0.705712
pepA	0.287555	0.141552	0.246673	0.374189	0.143312	0.0789694	0.0606929	0.14585	-0.0158023	1.47999	0.505602	0.557176	0.0727037
mraY	-0.0651954	0.688107	0.332367	0.473253	0.45663	1.47954	0.535796	0.373421	0.883989	1.3242	1.0285	0.740584	1.15583
ycjO	-0.0308516	0.226565	0.194775	0.0944568	0	0.216359	0	0.187001	0	1.47925	0.590337	0.255495	0.235994
astA	-0.0598967	0	0.0893406	-0.00717534	0.0741772	0.380504	0.726753	0.235991	0.800654	1.4765	0.844769	0.273427	0.291597
hycE	-0.782877	0.106794	0.135038	0.518688	-0.0178595	0.714571	0	0.261984	-0.242438	1.47545	0.804174	0.0257034	0.0096077
flhD	0.151943	1.47401	-0.395001	0.369724	-0.109074	0.863467	0.263003	0.0476259	-0.461147	0	0.0515738	-0.351549	-0.0207133
ylbE	0	0.115306	0.277152	-0.152835	0.289442	0	0.406065	-0.0817086	-0.409869	1.46838	1.02667	0.806679	0.101534
mtlA	-0.969495	-0.685573	0.329087	0.108835	1.19999	-0.11158	0.490241	0.899951	-0.484356	0.400811	0.540174	1.46835	0.0352195
glcG	-0.595835	0.231355	-0.0533755	0.34506	0	0.0178012	0.168875	0.116424	0	1.46554	0	-0.214326	-0.03147
yecH	-0.101665	0.00253699	0.521501	0	0	0.479609	0.457049	0.189868	0.027137	1.46449	1.11541	0.226484	0.283216
ulaF	-0.000412985	1.00988	0	0.528147	0	0.999118	0.517081	0.43929	0	0.496015	0.632372	0.529457	1.4642
gntT	-0.320062	0.845254	-0.0866007	-0.189617	-0.14511	0.628949	0.719561	0.346524	0.373158	1.46413	-0.0958461	0.0151877	0.432355
dbpA	-0.344423	0.0890929	0.273825	0.171539	0	0.236578	0.671505	0.356924	0.56771	0.901569	1.46343	0.691904	0.372624
dnaE	-0.245024	0.0972439	0.23048	0.133483	1.46325	-2.29278	-1.64893	0.140178	0.0489424	-1.56635	-0.322388	1.01027	0.12
yjtD	0.268148	-0.0620097	0	0.324727	-0.156977	-0.364572	-0.708783	0.068387	1.13762	-0.822328	0.527819	0	1.46325
yajG	-0.825527	-0.483167	0	-0.00869121	0.32623	0	0.223674	0.0183958	0	0	0	1.46233	0.431793
mhpT	0	0	-0.0245142	0	0.394721	0.276179	0.220534	0.128749	0.0543548	1.46178	1.1413	1.03937	0.337584
glyS	-1.3667	0.139631	-0.599778	0.693856	0.117367	-0.380313	0.698612	0.137535	0.193266	1.46091	-0.0684868	0.693373	-0.411738
chaC	0	0.219338	0.15806	0.569104	0.208707	0.483313	0.0222768	0.0948983	0.178688	1.46044	1.41925	0.308877	0.571743
glpX	-0.653717	-0.475063	-0.0608225	0.0750183	-0.280236	-0.0766026	0.414559	0.421468	1.45819	0	-0.491045	-0.176471	-0.640141
yphD	0.1881	0.425955	0.159111	0.114359	0.270733	0.423074	0.0837088	0.169317	0.636986	1.458	0.898578	0.556087	0.0593664
aroA	-0.127384	0	0.278707	0.109838	0.244902	0.654162	0.147875	0.333162	0.264933	1.45756	0.738453	0.529531	0.524948
ubiH	0.0952696	0.369892	0.171015	0	0.173288	0	0.270901	0.34734	0.429736	1.45709	0.684529	0.125373	0
caiT	0	0.506894	0	0.289196	0.184169	0.14039	0.466734	0.867629	1.45684	0.80712	1.21864	0.893924	0.838077
dppF	0	0.260572	0.20466	0.0145718	0.0471251	0.546914	0.585077	0.141071	0.481064	1.45665	1.08724	0.826351	1.0355
yneF	-0.456476	0.659159	0.0434344	0.0795152	0.0956539	0.404177	0.735203	0.675332	0.247406	1.45659	1.28121	0.973056	0.61282
cpsG	0.39708	-0.0608611	0.0414603	0.0316182	-0.0482494	0.120375	-0.210598	-0.289984	0.527494	1.45125	1.06745	0.405827	0.392468
ydhV	0	-0.074465	0	0.362627	0	-0.0689604	0.476513	-0.114813	0.409252	1.44725	1.26687	0.250823	0.107195
wcaK	-0.474247	0.204196	0.274739	0.0417642	0.382417	0.509633	0.417294	0.390687	0.219691	1.44354	1.16449	0.511409	0.434106
ytjB	0	0	0.178014	0.226617	0.31229	-0.2202	0.164942	0.232279	0.25819	1.43997	0.40753	0.0980002	0.0371427
rseC	-0.458684	1.43707	0.0145797	0.309888	-0.0291626	0.119301	0.799695	0.343587	0.0314411	0.0916152	0.288493	0.044207	0.496306
ybiA	-0.0461162	0.450291	0.119677	0.453223	-0.0622907	0.101063	0	0.079845	0.685627	1.43472	1.00091	0.235672	0.139165
mdoH	-1.20663	-1.19914	0.0115367	0.246717	-0.388709	-0.411505	-0.767649	-0.259814	1.43402	0.787116	-0.53608	0.346955	-0.583686
rhaD	-0.017173	0.247631	0.144025	0.802682	0.0776308	0.375183	0.617903	0.354734	1.16679	1.43244	0.840014	0.668244	0.193112
ybl187	-0.291948	0.0394092	0.129438	0.133048	-0.0770238	0.410617	0.0948045	0.100332	0.571629	1.43131	0.371222	0.00492811	0.215136
yebN	0	0.227858	0	0.569264	0	0.633017	0.765508	0	0	1.42897	0	0	0.530009
xerD	-0.24373	0.186964	0.337193	0.196428	0.424067	0.22691	0.0601459	0.0818817	0.749298	1.42626	0.57493	0.383688	0
ybl226	-0.0335172	0.226172	0.146632	0	0.350584	-0.0729816	0.0706426	0.364641	0	1.42434	0.78778	0.602142	0.072406
yaiTU	0.175111	-0.775497	1.42379	0.1226	-0.98166	-0.481737	0.4546	0.36626	-2.72748	1.17988	-0.305826	-0.278523	-0.153918
acpS	0.0144264	0	0.0998598	0	0	0	0	0	0	1.42276	0.551652	0.349904	0.464352
ygfT	-0.0783468	-0.40404	0.129414	0.101235	0.247927	0.867312	0.282992	0.221528	-0.128186	1.42262	0.469366	0	-0.217366
glk	0	1.41958	0.011489	0.428533	0.053184	1.32697	0.914985	0.590867	0.461253	1.42117	0.24715	0.218023	0.683343
fepA	-0.784412	1.41877	-0.287024	0.642287	-0.226163	0.245469	0.889325	0.385947	0.49973	0.0568662	-0.408101	-0.14764	1.15825
yggG	0.0165134	0.218925	-0.061149	0.384449	-0.208711	0.206668	0.392273	0.0371391	0.586722	1.41024	0.178052	0.191066	0.365294
insB-9	0	0	0.101849	0	0.195385	0.0687309	0.77928	0.0516396	0	1.40956	0.57409	0	0.549083
recC	1.3222	1.09679	0.00177386	0.445778	0.148867	1.40803	0.213151	0.357299	0.223582	0.511454	0.233664	0.309912	0.136696
ldrC	0	0	0	0.17372	0.0623363	0	0	0	0.538792	1.40684	0.775123	0	0
yhiL	0.196395	0.320874	0.0779483	-0.398476	0.161189	-0.0464654	0.453686	-0.455376	0.112884	-0.54562	0.750513	1.4056	0.344832
glnW	0	0	0	0	0	0	-0.257583	0	1.40443	0	0.392811	-0.535266	0
ybhR	0	0	0.36475	0	0.348587	0.774579	0.62007	0.348413	0.603134	1.4036	1.10507	0.939632	0.0377615
yegD	-0.174405	0.412419	-0.0422949	0.258962	0.426044	0.252192	0.161659	0	0.181249	1.39829	0.128197	0.904241	0
ccmC	-0.377534	0	0	0	0.175704	0.00819129	0.330301	0	0	1.39205	0.0343498	0	0.277235
betI	-0.127447	0.016639	0.0540761	0.525867	0.226667	0.381396	0.71072	0.0101627	0.0276906	1.38895	0.604438	0.206661	0.409215
gcvH	0.0142135	-0.0394549	0	0.0182893	-0.055145	0	0	0.599674	0.00993858	1.38377	0.542519	0.177748	0
hrpB	-0.290629	-0.523871	0.189601	0.147482	0.217823	-0.0952346	0.255042	-0.15318	-0.328415	1.38376	0	0.22851	-0.764343
ccmB	0	-0.117345	0.123162	0	0.476428	0.434492	0	0.383535	0.339938	0.32904	1.38338	0.112311	0
ybdZ	-0.395444	0.655751	0.0600501	0.206833	0.533756	0.271019	0.00882005	0.289409	0.134514	1.38338	0.671369	0.240102	0.488818
kdsB	0	0.268297	0.0150626	0.00377383	0	0	0	0	0	1.38067	0.730202	0.292941	0.115938
recX	0	0.0583786	-0.0780848	0	-0.0431303	0.285447	0	0.282452	-0.0826706	1.37618	0.492514	0.232166	0
viaA	0.430787	0.201497	0.0386586	0.308093	0.152337	0.37584	0.711845	0.453255	0.458683	1.37599	1.09839	0.940155	0.716317
hpaX	0.246957	0.894125	0	0.445726	0.290612	0.720129	0.131503	0.802759	0	1.37563	1.24348	0.354434	-0.0935845
gsiC	0	-0.131644	0.00642867	0.196335	0.0892326	0.28526	0.405375	0.587228	0.462159	1.37554	0.680239	0.160075	0
kdpB	0	-0.0892667	0.108235	0.339512	0.395177	0.658756	0.151483	0	-0.258338	1.37312	1.26398	0.779725	1.1739
tldD	-0.795856	0.060976	0.2057	0.206502	-0.40687	0.303727	0.447368	0.272987	0.353016	1.37289	-0.108316	-0.214686	0.0853824
glpK	0.0718986	0	0.129591	-0.139769	0.244294	-0.347865	-0.100249	-0.249868	0.555738	1.37125	0.360117	0.512725	-0.520046
sstT	0.76478	0.879033	0	0	0.544165	0.480311	1.37043	0.47583	1.36606	1.29692	0.369323	1.29845	0.41354
yegH	-0.00464942	0.376577	0.0423509	0.366674	0.378195	0.492723	0.729556	-0.00752413	0.90324	1.36964	0.790305	0.650754	0.187891
seqA	0.1029	1.01306	-0.0149027	0.631706	0	-0.183995	0.00530724	1.36812	-0.0731576	0	0.722466	-1.5487	0
yejF	0	0	0	0.275494	0.217	0.81342	0.649647	0.41578	0.834106	1.3665	0.929181	0.845569	0.478609
prc	0.552259	-0.575841	-0.130796	0.154582	-0.489285	0.446486	0.797861	0.624965	0.88386	1.36621	-0.458753	0.628088	-0.371936
ybhO	-0.0931031	0.195204	0.226301	0	0.490209	0.247805	0.92072	0.673365	0.772178	1.36596	0.772641	0.367449	1.08364
metE	0.181556	-1.04877	-0.642746	0.141812	-0.639623	-0.255006	-0.11115	-0.114528	1.36322	-1.52857	-1.37158	-0.890828	-0.927187
ydcK	-0.777138	0.603058	0.34927	0.30657	0.229053	0.164809	0.366355	0.238735	0.469979	1.36279	1.34091	0.418226	0.412478
rpmI	0	0	0	0	0	0.00683239	-0.0832864	0	1.36197	-0.637617	0	0	0
uhpT	-0.527835	-0.663722	-0.308868	-0.3623	-0.141935	-0.485637	1.03791	-0.234841	1.36167	-0.433285	-0.186234	-0.594872	-0.657818
pncA	0	-0.0795757	0.252134	0.297151	0	0	-0.104866	0	0	1.3592	0.77069	0.198627	0.267323
ansA	-0.440144	0	0.0378946	0	0	-0.137381	0.121802	0.0888694	1.35769	0.260979	0.176846	0.0011599	-0.229253
dkgA	-0.655385	-0.423909	-0.148314	0.132897	-0.401395	0.343924	0.24066	0.152424	1.3575	-0.120563	-0.0201438	-0.275374	0.0992556
cobS	-0.343992	0.32015	0.18012	0	0.0904353	0.015076	0	0.0818144	-0.636586	1.35564	0.515413	0.7737	0.449006
yicH	0.205274	0.248067	0.162793	0.473549	0.0700148	0.434876	0.397836	0.435406	0.478077	1.35497	0.676686	0.436776	0.336562
ydiO	0	0.816878	-0.118783	0.377372	-0.0548885	0.5713	0.458294	0.0544305	0.0618543	1.35313	-0.0584874	0	0.607858
aspV	-0.242875	0	-0.231101	0.217703	-0.00398845	0.362569	0.82708	0.251601	0	1.35253	0	0.519589	0
ybdD	0	0	0.091705	0.252246	0.537548	0.281322	0	0	0.857602	1.34877	0.71754	0.381496	0.182346
rpsA	0.92436	1.05398	-0.528382	0.6596	-0.00999177	1.34774	0.791062	0.717352	0	-0.0884544	-0.481916	0	-0.0977605
yeaT	0.0495878	0.123331	0.0516703	0.241747	0.15072	0.309367	0.0779091	0.055917	0.412945	1.34548	0.695534	0.594034	0.17643
lolC	0.835977	-0.670616	-0.155275	0.631785	-0.756027	0	0.969286	1.34531	-1.87988	0	-1.17148	-2.22341	-0.306323
ssuB	0.232653	0.168238	0.00849204	0.292854	0.452664	0.279197	0.0810006	0.361593	0.986892	1.34522	1.08883	0.966898	0.449174
yfcC	-0.240282	0.317497	0.185624	-0.252288	-0.169911	0.0257373	-0.181326	-0.588306	1.25191	1.34369	0.83134	-0.442774	-0.101926
hypC	0.00993359	0.846259	0.198132	0.246779	0.646274	0.434601	0.0602552	0.760709	0.490423	0.934015	1.34299	0.963625	0.471623
copA	-0.651928	0.532815	-0.0657163	-0.423581	-0.0312871	-0.0600444	0.176347	-0.0824271	0.683786	1.22669	1.34123	0.000878452	0.912954
kefB	0	0.821459	-0.198275	0	-0.552837	0.881957	0.944099	0	1.1654	1.19774	0.930045	1.34077	0
glnX	0	-0.0305571	0.154649	0.240523	0.370967	0	0.0265848	-0.242109	0	1.3373	0.213114	0.205991	0.606511
rng	0.951819	0.530362	0.265849	0.353375	-0.0324876	0	-0.0166128	0.308306	0.313198	1.33726	0.352332	0.654815	-0.00272561
serT	-2.11211	-0.992648	-0.832472	0	-0.189185	0	0.885451	1.33708	-0.424045	-0.237796	-0.516318	0	0
yfhR	0	0	0	0	0	0	0	0.21598	1.33143	0.666888	0	-0.0692148	0.37283
ydfZ	0.115339	0	0.2553	0.0468149	0.347288	0.321132	0.440046	0.487179	0.270523	1.32748	0.948147	0.56428	0
folE	-0.39162	-0.126248	-0.00335768	0.00734067	-0.135366	-0.207633	0	-0.155583	-1.0354	1.32588	0.682267	0.175391	0.433622
pulJ	-0.0688311	-0.098632	0.0201943	0	0.0643131	0	-0.151495	0	0.516618	1.32487	0.591035	0	-0.116347
proM	0	0.0358591	0	1.3245	0	0	0	0	0	0	0	-0.484706	0.30175
cpdA	-0.482689	1.32399	-0.0431059	0.264031	0.479803	1.2389	0.907775	0.808847	0	0.475919	0	0.90596	0.277363
cfa	-0.979193	-0.0211826	0	0.770623	0.225274	0.388966	0.676606	0.804639	0.138772	1.2287	1.32339	0.234381	0.24431
ybl159	-0.218238	-0.0345811	-0.0325599	-0.0187916	0.217523	0.000180708	0	0.105998	0.388394	1.32196	0.540916	0.0180364	0
yrhC	0.951554	0.634532	0.409722	0	0.935476	0.0502254	0.452086	0.31077	0	0.872412	1.05201	1.32159	0.590381
arnD	-0.0384738	0.0801518	0.2255	-0.0307383	0.0449725	0.0417168	0.0806262	-0.105636	0.573831	1.32082	0.912453	0	0.726418
ybaS	0.0769334	0.59415	0.0556477	0.21621	0.232601	-0.222277	0.338847	0.171691	0.127823	1.31984	0.805287	0.314778	0.273971
tmcA	0.601012	0.728309	0.0922683	0.0881289	0.0766831	-0.0455878	0.684533	0.307961	0.003629	1.31746	1.02317	0.535316	0
recN	-0.0382142	0.173378	0.221924	0	-0.23988	0.42989	-0.374052	0.191965	0.783944	1.31646	0.238665	0.830587	0.0974423
ybl223	-0.580409	0	0.160505	0.112964	0.551168	0.6819	0.42188	0	0.269408	1.31347	0.338539	0.22911	0
bioA	0	0.262246	0.285213	0.37047	0	0.45109	1.13966	1.31306	0.545785	0.20216	0	0	0.480538
ybl218	0.338282	0.235023	-0.189726	0.408462	-0.472422	1.30865	0.447982	0.640484	-0.262806	0.934252	0.422596	0	1.28912
yphE	-0.37204	0.00140334	0.114066	0.946777	0.226971	-0.00900667	0.34296	0.93473	0.984123	1.30853	1.17526	0.836883	0.0341629
folC	-0.606469	0	0	0.470273	-0.34565	0	0	0.332339	-0.590912	1.30796	0.873586	0.730222	0.244811
metH	0.48598	-0.975422	-0.477189	0.826352	-0.14439	1.30698	-0.634129	0.89194	-0.701795	-0.55155	-0.233591	-1.36725	-0.450166
ybl182	0.444823	0.46699	0.214193	0.260345	0.299216	0.0603969	0.143615	0.20565	0.585415	1.30442	0.589266	0.656183	0.119042
prpB	-0.523768	0	0.0189998	-0.0513204	0.269852	0.343885	0.330299	0.781713	0.331443	1.30441	0.869182	0.297405	0.249764
cysU	-0.100661	0	0.0107397	0	0.0248931	0.179829	0	0	1.08254	1.30292	0.850243	0.229949	0.0010079
yhaB	0.00193425	0	0.0774937	0.0469205	0.251937	0	0.478926	-0.268494	0.145716	-0.026589	0.216534	0.0742872	1.30099
gudD	-0.312403	0.542603	0.170401	0.105608	-0.221818	0.0858239	0.232203	1.0769	0.193392	1.29926	0.872922	0.299543	-0.110093
ybl228	0.117775	0.69007	0.198267	0.462602	0.222427	0.0457355	0.68652	0.549125	0.796124	1.29857	0.244405	0.11671	0.0814724
gsiD	0.178792	0.08003	0.144826	0.358762	0.478329	0.304266	0	0.288547	0	1.29832	0.650286	0.917337	0.476821
fabR	0	-0.386808	-0.0703565	0.0490191	0	0	0.291714	0.0989713	-0.0723323	1.29751	0.253388	0.294394	0
aaeR	-0.118711	0.0469163	0.250427	0	0.131493	0	1.29705	0.284066	0	1.14985	0.678618	0.792739	0.224118
ynfG	-0.617129	0	0.148242	0.0107995	-0.0411985	0.0883915	0.345457	0.179676	1.04325	1.29552	0.511781	-0.254923	0.108451
fis	-0.911931	-0.221595	0.0537721	0	-1.39418	0.437537	1.01323	0.792769	-0.675234	0.312499	-0.0347473	-0.621449	1.28958
yfhA	0.157749	0.601509	0.215835	0.369589	0.0493492	0.22174	0	1.05743	0.426155	1.12906	1.28908	0.575073	0.122091
yohF	0	0.138204	0	0.400381	0.101152	0	0.427309	0.158006	0.67442	1.28833	0.211727	0.238328	0.140858
ybjS	-0.0934968	0.103869	-0.0361496	0.184473	0	0.21036	0.486347	0.276817	0	1.28756	0.19091	0.137886	0.467927
thiK	0.0546668	0	0.557413	0.12748	0.179922	0.343149	0.101415	0.0867462	0	1.28725	1.01301	0.291682	0.16928
ycbS	-0.101273	1.28412	0	0.179588	0.261792	0.441684	0.626898	0.337557	-0.255728	0.663423	0.798222	0.237323	0.880711
chbR	-0.128942	0.271645	0.322802	0.180592	-0.128614	0.376885	0.210209	0.205624	0	1.28375	0.698567	0.50315	0.424891
argH	0	0.231993	0.0146502	0.206088	0.0429857	0.133308	0.597718	0.693939	0.564134	1.14938	1.28242	0.691677	0.647479
arpA_3	0.484862	0.248604	0.115451	0.49883	0.233351	0.281048	0.257035	0	0	1.28154	0.918044	1.11612	0
hyaC	-0.054108	0	0	0	0.127357	0	0.547831	0	0.118097	1.2785	0.598953	0.228898	0.130364
purK	0.0640452	0	0.40541	0.0142355	0.401627	0.00394182	0.150781	0	1.27587	0.609941	0.866094	0.684488	0.32287
thiP	0.0498717	0.961898	0.203511	0	0.726673	0.168387	0.689571	0.350173	0	1.2742	1.15307	0.9921	0.401376
flhA	0.0986575	-0.374929	0.241829	0.588575	0	0.531239	0.0060957	0.726163	0	1.27181	0.643456	0.235482	0.298134
yidL	-0.0222046	0.176782	0.222423	0.245784	0.159038	0.366049	0.692785	0.12557	0.573669	1.01198	1.27154	1.05166	0.216387
phoA	-0.204627	-0.0536349	0.0565916	0.25101	0	0.231291	0.4618	0.0323748	0.300237	1.27108	0.116177	0.0740151	0.161073
melR	-0.0768531	0.0922887	-0.140603	0	0.310147	0.213637	0.248819	0.119385	0.234272	1.26994	0.799578	0.563213	0.487087
ydfJ	0.0111146	0.831745	0.267964	0.434259	0.199926	0	0.170805	0.152974	0.390014	1.26931	0.702467	0.400676	0.0302548
yceM	-0.0318718	0.292645	0.2295	-0.17901	0.0688022	-0.0206261	0	0.41845	0.52722	1.26775	0.783552	0.33394	-0.0656864
trkH	-0.220188	-0.0881218	-0.413061	0.279541	0.0675961	0	-0.127588	-0.338188	1.20382	1.26742	0	-0.0773619	-0.0241074
focB	0.507644	0.297653	0.290115	0.468205	0.268198	0.797336	0.0780499	0.56315	0.26841	0.921708	1.26546	0.129755	0.184227
yehX	0.627922	0.142754	0	0.242489	0	0.523782	0.189028	0.671441	0	1.06941	0.215924	0.140604	1.26538
malT	-2.13811	1.24598	-0.577716	0.725825	-1.49284	0.621488	1.26534	0.469485	-1.12425	-0.652077	0.343954	-1.46778	0.449307
bioF	0	0.444318	0.296863	0	0.122884	0.189032	0.613162	0.194942	0.454559	1.11654	1.26489	0.583888	0
wcaD	0.427163	0.0362404	0.13111	0.267349	0.185432	0.101425	0.230901	0.414931	0.635017	1.2638	0.407385	0.52395	0.8311
yneG	0	0	-0.062507	0.0729771	-0.0792803	0.225799	0.10969	0	0.496692	1.26353	0	0.365593	0.00813394
hyaB	0.164822	0.714015	-0.015968	0.872906	-0.164563	-0.232885	0.400405	0.582158	1.2617	1.20572	0.93812	0.705301	-0.227433
yicI	-0.544092	0	-0.383993	1.08176	0.0708473	-0.355911	0.287946	1.07586	0.382464	1.26087	0.977697	-0.0198551	0.771041
fadM	0	0.271301	0	0	0	0.216707	0	0.00585751	0.47367	1.25971	0.709921	0	0
astD	-0.254934	-0.0289086	0.0260789	0.0120577	0	-0.111782	0.0329725	0.201375	-0.00890687	1.25746	0.309143	0	-0.02942
yfaH	0	0.368233	0	0.00218564	0.135505	0.117348	0.152245	0	0.571615	1.25452	0.0517846	0.171818	0
gatB	-0.0936585	0	0	0.203107	0	0.0608692	0	0	0.591129	1.25386	0	0.273753	-0.0281643
yagR	-0.430215	0.275877	-0.0555152	0.292756	0.444675	0	0.775071	0.134421	0.171295	1.25155	1.11276	0.379361	0.0402001
iaaA	-0.128318	0	0.100828	-0.193582	0.019085	-0.195312	0.135259	-0.136278	0.485049	1.24986	0.0980979	-0.0932495	0
yegT	0	0.411358	0	0.713132	-0.210449	-0.0287634	0.460171	1.24927	-0.828885	0.335231	0.874993	-0.443854	0.144133
yeaU	-0.256909	-0.271639	0.0593422	0.0917605	0	0.346565	0.12436	-0.185318	0	1.24858	0.733909	0.0317646	0.236527
yfbK	0	-0.39009	0.0254118	0.438123	0.238207	0	0.112674	0	0.0198087	-0.141017	0	1.24855	0
cyoA	-0.160687	0.197636	0.292237	0.0636252	-1.32443	-0.0407114	0.603145	1.24793	-1.45312	-0.119289	-0.123258	-0.740004	0.120441
rluD	0	0	0	0	-0.0492692	0.594492	0.0288391	0	-0.357671	1.24781	0.0870048	0	0.383191
yebR	0.012815	0.519329	-0.0788319	0.0285291	0.236819	0.229785	0.120658	0.120542	0.575176	1.2468	0.529532	0.208008	0.546327
ycaM	0.0911516	0.327255	0	0.308473	0.12592	0.03421	0.0659753	0.0654189	0.466199	1.24425	0.743731	0.249227	0.268138
flgI	-0.250839	-0.444595	-0.0528318	0	0	-0.149871	0.0957818	0.0415236	1.24406	0.535056	0.378175	0	0.00561841
ybgD	0.256556	0.275193	0.0911027	0.185327	0.194352	0.0521878	0.241291	-0.20926	0.715378	1.24394	0.848589	0.746022	0.427699
fabA	0.652321	0	-0.825695	0.346329	0.550405	1.24199	0.885849	0.589989	-1.50375	0.372105	0	1.1597	1.17181
phnL	-0.162868	-0.234127	-0.0908308	0	0	0	0	-0.0330918	-0.162787	1.24174	0	0.314263	-0.0695231
uxuR	0.348431	0.215703	0.178083	0.443575	0.141045	0.341766	0.400554	0.29941	0	1.24165	0.720075	0.558155	0.637178
hda	-0.0222034	0.458082	0	0.88617	0.0685189	0.381581	0.214518	-0.0914881	0.364865	1.2404	0.00970368	0	0.388334
ilvE	-0.603955	-0.345659	0.1013	-0.118435	0.133875	0.254989	0.204234	0.382806	-0.0622262	1.24016	0	0.426007	0.44831
yhfT	0.0625968	0	-0.101591	0	0.0851599	0.272751	-0.171791	0.308399	0	1.23929	0.223092	0.143023	0
pntA	-0.435459	-0.172297	-0.0627015	0.00462761	-0.425332	0.171005	1.23881	0.371565	-0.324384	-0.728528	-0.585342	-0.563215	0.492359
kdpE	0.452194	0.704112	0.201975	0.15881	0.639077	0.0176521	0.0613162	0.466911	0.698795	1.04202	0.691071	1.23771	0.934804
wcaI	-0.923502	0.695255	0.187135	0	0.239634	0.333078	0.335972	0.686332	0.540139	1.23726	0.932323	0.402062	0.495818
fadI	-0.00366002	0.0162239	-0.0368904	0	-0.163191	0.079175	0.111431	0.144324	0	1.23666	0.632023	0	0.0448383
cheZ	-0.264291	0.0511186	0.374066	0.206164	0	0.172063	0	0.472417	-0.221308	1.23615	0.387003	0.513617	0
yadD	0.0872716	0.259841	0.258299	0.460738	0.0717686	-0.0345447	0.600784	0.118814	0.288891	1.23495	0.734756	0.598246	0
ycaI	-0.0601149	0.11233	-0.0375119	0.589701	0	0.652031	1.23319	0	-0.387981	1.11218	0.637716	-0.327068	-0.0642264
yfgO	0	0	0	0	0.237191	0	0.007231	0	0.584298	1.23266	0.266294	0.130829	-0.195552
ybl66	-0.8971	-0.513013	0.248255	0.551796	0.606145	-1.1375	-0.493647	-0.289507	-0.460254	0.396286	-0.245112	1.23266	-1.30968
yejE	-0.15164	0.265684	0.0488628	-0.0301343	-0.071653	0.0346861	0.36178	-0.0561405	0	1.23231	0.606832	0.58712	0.0231996
yedZ	-0.0372651	-0.145708	-0.0591124	0	0.0843627	0.182655	0	0.104302	-0.546329	1.23231	0.300985	0.267871	0.248844
eptB	0	0.155177	0	0.294112	0	0.155917	1.23108	0.311232	0	0.258256	-0.230528	0	0.424126
yghD	0	0.276029	0.154555	0.186716	0.146781	0.450611	1.23084	0.292328	0.31392	0.536936	0.549384	0.67862	0.45919
rseA	0.392382	0	0.0803181	0.52121	0.0226165	0.387882	1.20962	0	0.162051	1.23074	0.457275	0.720054	0.467209
fabD	-0.467336	-0.714477	0	-0.719043	0	-0.343012	-0.29486	-0.888571	1.22978	-1.09694	-0.708305	0	-0.643323
gntP	0.826218	0	-0.418765	1.22928	0.250495	0.941555	0.455787	0.313197	-0.517981	-0.327685	-0.750276	-0.709363	0.607684
valW	0.276929	-0.508059	0	0.0206386	0	0.0365259	0	0.600828	0	1.2277	0.603906	0	0.364301
metI	0	0	-0.0495979	0	-0.148413	0	0	-0.0462477	1.22767	0	-0.100345	-0.357275	0.00624972
ldcC	0	-0.168559	0.33195	0.938537	0.0602871	-0.0983934	0.554754	0.362571	0.500647	1.2269	0.394166	0.53264	-0.0558599
hinT	0.220655	0	0.0169049	0.144647	0	0.185403	0.422438	0.213965	0.601301	1.22669	0	0	1.00959
ybl97	-0.173522	0.194086	0	0	0.772057	0.24698	0.431589	0.267539	1.22611	-0.378562	0.223317	1.01121	0
ybl178	0.154665	0.514422	0.0259554	0	0	0.31445	0	0.406502	0.177726	1.22606	0.521136	0.346646	0
fldB	-0.161532	0	0.145215	0.24686	0	0.548809	0.164451	0	0.0658081	0	0.479759	1.226	0.285868
ydfU_2	0	0	0.26982	0	0	0.500382	1.22497	0	0	0.402484	0.252778	0	0
hybB	0	0	0.0538744	-0.290864	0.22174	0.392963	0.258595	-0.0265592	0.156447	1.22487	0.347261	0.902735	-0.0965286
yqcC	0	-0.132393	0	0.201246	0.967129	0.152166	0.0737564	0.196082	0.359939	-0.0786162	0.154509	1.22393	0.427267
srlR	0	0	0.14898	0	0	0.428196	0.328035	0	0.833861	1.2229	0.844397	0.405717	0.170921
hdfR	0	0	-0.400838	0	0	0	0.411577	0	0	0	0	0	1.22267
wzxC	0	0.110134	0.0622268	0.202412	0.0627234	0.497347	-0.239657	0.15651	0.202014	1.22247	1.09	0.093071	0
ptsA	0.332807	0.977384	0.245197	0.439418	0.249445	1.0778	0.844589	0.467454	0.60694	0.900464	1.22175	-0.643941	0.350016
dppC	0	0	-0.00419853	0	0.304449	0.368753	0	0.388502	0.189102	1.22156	0.469641	0.394105	0.184362
araG	-0.662791	0.0532059	-0.093155	-0.155624	-0.00815085	-0.0605069	0.0477891	0	0.168492	1.22142	0.845617	0.348529	0
yicO	-0.617279	0	0.0891796	0.331058	0.512923	0.524852	0.312035	0.219185	0.235687	1.21937	0.450816	1.0469	0.514522
map	-0.156149	-0.0343012	-0.0841194	-0.276186	-0.015821	-0.2149	0.0397487	0.097093	-0.77258	1.21881	0	0	0.15078
ybl134	-0.141373	0.49099	0	0.0618933	-0.132668	-0.0339966	0.172021	0.440343	0.174118	1.21792	0.457579	0.366507	0.290757
cysI	-2.44671	0.417826	0.540795	0.0383219	0.73324	-0.785944	0.066693	0.341423	-0.0618862	-0.457058	0.77471	1.21786	0.547827
higB	0	0.721079	0	0	0	0	0	0.00179371	1.21723	0	0	0.756716	0.648854
narJ	-0.203294	-0.164295	0.137284	-0.0197747	0	-0.000876141	0	-0.0962073	0.162676	0.167356	0.492973	-0.200323	1.21517
ybgI	0	-0.125118	0.124888	0	0	0	0	0	1.21381	0.589931	0.0879315	0.0209298	0
ydfU_1	0.341788	1.21307	1.15371	1.13416	0.147773	0	0	0.749593	0.856505	0.365202	1.06007	0	0.544607
ycbT	0.241607	0	0.195292	0	0.354989	0.042829	0	0.0400355	0	1.21176	0.967217	0.121841	0.784508
betB	0.00473423	-0.867468	0.246785	0	0.161049	0.241425	0.463135	0.153646	-0.100321	1.2108	0.802665	0.71143	0.337483
malG	0.515475	0.081389	0.22392	0.3645	0	0.321513	0.00105416	-0.0246204	0.384297	1.20853	0.0785665	0.423524	0.288916
ybiT	-0.270875	0	-0.176528	0.384477	-0.141904	0.656323	1.20506	0	0	0.0583989	-0.169386	-0.0539068	-0.212469
yiaV	0.205841	0	0.166945	0	0.435387	0.451401	0.0172955	0.112126	0	1.20399	0.888893	0.164933	0
eutL	0.432597	0.204774	0.311285	0.422906	0.195962	0.252581	9.68584e-05	0.280951	0.539276	1.20373	0.157339	0.577678	0
yliJ	0	-0.0804998	0.000350031	0	-0.478228	1.20338	0.133885	0.0302885	-0.110693	-0.417679	-0.0500751	-0.2793	0
cysN	0	0.344283	0	-0.315795	0	0.441384	1.20301	0.192701	0	0.649898	0.616043	0.107855	-0.0693169
ygiQ	0.302398	0.227153	0.268016	0.761779	0	0.666556	1.06439	0.775525	0.628129	1.20265	1.13121	0.512215	0.362434
fabZ	-0.66855	-0.151316	0	0	-0.347981	0.268993	0.301271	0	0.127308	1.20187	0.100937	0.390447	0.0655848
pepP	0	0	0.545193	0	0	-0.457269	0.0420104	0.275414	0.22328	1.19912	0.192564	0.00161014	0.154343
yjiP	0	0.770778	0.185118	0.262236	0.366667	0.224085	0.287326	0	0.226678	1.19911	1.09043	0.509791	0
tppB	0.567003	0.662901	0.494891	0.0877881	-0.302635	0.358852	0.979704	0.11153	0	1.19892	0.156286	-0.387679	0.327244
aas	-0.0761045	0.47182	0.465186	1.19759	0.0396097	1.09981	0.0812693	0.47561	-0.195869	0.874731	0.0588702	-0.01972	0.104513
yiaU	0	0.352266	0.203689	0.0775987	0.179404	0.269105	0.00506759	0.214289	0.565509	1.19636	0.819565	0.677945	0.588179
yeiE	-0.183618	-0.03366	0.166894	0.396804	0	0.00105739	-0.0788698	-0.125157	0.508647	1.1946	0.956326	0.622455	0.430102
murF	-0.499497	0.119385	0	0.350668	0.045695	0	0.408606	0.219905	0.0203461	1.18984	0.369985	0.327156	0
hofQ	-1.12538	-0.047264	0.123807	-0.0990497	0.396079	0.00301393	0.644673	0.1718	0	1.18909	1.16727	0.524255	0.194951
pldB	0.0106697	0.0782079	0.139517	0	0	0	-0.214515	-0.223362	1.18849	0.386328	0.52031	0.389654	-0.0360205
ytfK	0	0	0	0	0.164294	0.833838	0.47303	0	-0.623967	0.287527	0.994418	0.956461	1.18842
ggt	-0.551686	0	0	1.1881	0.216977	0.353187	0.0197911	0.529666	0	0.200912	0	0	0
ybl186	-0.40424	0.0855663	0.233046	0.0133654	0.211418	0.659145	0.799578	0.434152	0.17017	1.18809	0.282028	0.683526	0.912989
yjcD	-0.0291787	-0.0373228	-0.118024	-0.0982978	0.0281346	-0.224924	0.290071	0.616452	-0.755945	1.18298	0.84964	-0.0149588	0.0994362
ppdC	0.0322292	0	0	0.328824	0	0.393752	0.440007	0	0.452937	1.1812	0.218363	0.183891	0.45613
ssuE	0.310386	0.278492	0.391687	0.755652	0.532601	0.864618	0.616263	0	0	1.18115	0.842471	0.736526	0.430764
hyaF	0.164346	0.292307	0.153444	0.0555286	0.377212	0.227829	0.226885	0.229748	1.18089	0.464235	0.46449	0.680664	0.130117
yraM	0	0	0.148014	0	0	0.375173	0	0.112685	0.426412	1.1794	0.345013	0.605006	0.124038
ydcZ	0	0.625321	0.0784134	0.465705	0.205024	0.00986893	0.835316	0	0.637208	1.1792	0.374973	0.0427625	0.361035
puuC	-0.131013	0.123557	0.0929131	0.21087	0.245441	0.488546	0.0308971	0.0762222	-0.171736	1.17831	1.06551	0.447822	0.197991
yiaY	0.418004	0.73221	0.514659	0.710495	0.699682	1.17779	0.770808	0.876505	0.707172	1.15139	1.13221	0.819228	0.914687
polB	-0.0985732	0.100082	-0.0502274	-0.187769	-0.253353	-0.178023	-0.685315	-0.5288	0.558759	1.17351	0.58282	-0.93097	0.759974
yqeA	0	0.164236	0.102312	0.0421295	-0.108502	0.413537	0.248658	0.293832	0.257394	1.17285	1.1086	0.121333	0.0281331
stpA	0	-0.0852792	0	-0.167631	0.624331	-0.343739	-0.246445	-0.480426	0.726248	-0.700273	0	1.17236	0.074528
ypaB	-0.0969781	0.409741	0.0378593	0.106532	0.162306	0.478915	0.400106	0.281101	0	1.17168	0.0242548	0.393273	0.617694
thrA	-0.892928	0.418081	0.0294016	-0.177601	0.0738401	0.686197	-0.397302	0.184611	0.203339	0.47037	1.17044	-0.914996	0
galF	-1.35079	0.355512	0	0.634685	-0.0885165	0.919747	0.879135	0.158952	-0.342258	1.16765	-0.743908	-0.17275	0.201369
amiC	1.16562	0	0.216741	0.105106	-0.118282	0	0.0689513	0.309143	-0.130623	-0.683092	0	0	0.0749241
ulaB	0	0.188233	0	0	0.518436	0	0.346829	0.19191	0.226815	1.1636	0.815967	0.352173	0.0401167
frwC	0	0.334443	0.0648595	0	0.224708	0.545384	0.138768	0	0.701688	1.16166	0.479192	0.70709	-0.262663
uidC	-0.10698	-0.326764	0	-0.201771	0	-0.120442	0.144349	0.12059	0.53336	1.15883	0.709603	0.808275	0.854611
uidR	-0.322374	0.129038	0.00747387	0.848712	0.227311	0.436232	0.727443	0.415848	0.946493	1.15813	0.945572	0.679232	0.34638
gntU	-0.957475	-0.409863	0	0.220525	0.0249382	0.377756	0.735778	0.66188	1.15279	1.15698	0.860508	0.364416	0.559929
ybgJ	0	0	0.584756	-0.244617	0.257254	0.304047	0	0.294522	0	1.1566	0.786813	0	0
rpsD	-0.0906533	0	0.0422507	0.616114	-0.715377	0	1.15563	-0.168547	-0.17732	0	0	-0.40999	-0.116657
yjhR	0.0963289	0.268522	0.268997	0.106296	0	0.0933199	0.424515	0.349463	0	1.15526	0.58459	0.331179	0.483496
ccmF	0.362181	0.801753	-0.0175373	0.595116	0.00761291	-0.117576	0.199127	0.269291	0.552102	1.15332	0.926599	0.722215	0.369842
ubiD	0	1.15171	-0.180501	0.762277	0	0.651849	0.911864	0.646771	0	0.887214	-0.00562782	0.00293847	1.13127
motB	0.181633	0.569169	0.244418	0.222952	0.250013	0.499207	0.731261	0	0.322259	1.15126	0.848842	0.743794	0.87564
fryA	-0.404369	0.0503337	0	0.481396	0.105935	0.567888	1.03821	0.626508	0.298406	1.15035	1.01487	1.0254	0.398837
yjjK	-0.271068	-0.299658	-0.243346	-0.327908	-0.0500835	0.767576	-0.0958178	-0.0509118	1.14972	-0.492688	-0.647392	-0.901534	-0.663717
hcaD	-0.013797	0.485989	0.146231	0.0983917	0.124893	0.631327	0.635742	0.354321	0.915347	1.14932	1.02916	0.387696	0.309523
ispB	0.123218	-0.191371	-0.13113	0.388256	-0.106666	0	0	0.399118	-1.1916	1.1481	0.700654	-1.07748	1.03716
ybl148	-0.574523	0.153526	-0.0747746	1.14552	-0.348301	-0.146939	0.14217	-0.166861	-0.516256	-0.841907	-0.323416	-0.0686247	-0.303759
valV	0.0452697	0	0.116179	0	0.230497	0.319664	0	0	0.771415	0	0	1.14437	0.0271829
recG	-0.49001	0.215558	0.0960746	0	-0.157916	-0.339562	-0.231011	-0.209873	0.794307	0	0	0.0198408	1.14386
yqiG	-0.331012	0	-0.475603	0	-0.0651465	0.454415	0.553528	1.14232	-1.03105	0.144803	0.279453	-0.0607661	0.634915
yebT	-0.480726	-0.838742	-0.0227	1.14152	-1.78141	0	0.886129	-0.229093	-1.24384	-0.41487	-0.121144	-0.434225	-0.249271
yeiB	-0.471291	0.424027	-0.232794	0.162686	-0.0409385	0.166311	-0.361442	0.310077	0.0474012	1.14128	0.374662	0.46579	0.206838
yjiH	0.192389	0.311434	0.150702	0	0.112081	0.449731	0.420632	0.0582618	0.197696	1.13812	0.80665	0.611574	0.235146
hflC	0	-0.247499	0	-0.0966779	0.219097	0.365686	1.13784	0.530783	0.528071	0.451075	0.103127	0.179822	0.0945687
ydaN	-0.194097	0.372626	0	0.608774	0	0.146049	0.0519105	0.27124	0	1.13773	0.16581	0.302783	0
ypdA	0.319647	0.405645	0	0.541636	0	0.103669	0.76888	0.467245	0.88599	1.13723	0.524676	0.37167	0.0652825
acnB	0.317445	0.756445	0.114066	0.667388	0.159633	0.613002	1.13643	-0.0390013	0.88946	-0.452355	0.717344	-0.913127	0.733302
livH	-0.00500936	0.41289	0	0.0503888	0.246455	0	0.0888492	0.456789	0.388449	1.13632	0.259007	0.0403413	0
fdnH	0	0.720019	0.0706248	0.529556	-0.0421193	0.367255	0.199263	0.236747	-0.0567182	1.13624	0.464984	0.238814	0.422922
gadX	0.192818	1.1061	-0.0329203	0	-0.0773125	1.13588	0.172634	-0.0898422	0.79265	0.336127	0.16348	-0.0216055	0.570535
yidK	-0.124744	0	-0.0207907	-0.108067	-0.275629	0.161853	-0.072314	0.136689	-0.0502697	1.13575	0.592961	0.0830314	-0.0680837
yjjV	0.0614164	-0.116355	0	0.343665	0	0.114432	0.263318	0	0.341989	1.13368	0.195905	0.0534454	0
ynfC	0.0795329	0.305991	0.468962	0.0859084	0.398201	0	0.00966647	0	0.438982	1.13331	1.02072	0.444436	0.421383
ribA	-0.225678	0	0.00889419	0.115379	-0.437874	0	0.41969	0.246366	0.382269	1.13276	0.349654	0	0
phnF	0.105314	0.544585	0.368867	0	0.211803	0.011064	0.229093	0.204522	0	0.833682	1.13274	0.4484	0
marC	0	0	0.019105	0.199212	0.00783168	0.467281	0.0733035	0.102084	0	0.477135	0.8369	1.13219	0.227428
yhcO	0.0711823	0	-0.132233	0.0602039	-0.777704	0	0	0	1.13045	-0.225543	0	-0.011601	0.0104663
ybl153	-0.259823	-0.679157	-0.00200311	-0.226052	1.12937	0.424386	0	-0.0617231	0.120527	-0.41877	0	0.869912	0
yjjU	0.190331	0.223259	0.343405	0.269378	0.698665	0.289641	0.185696	-0.0965994	0.275758	0.204268	0.346059	1.12923	0.454147
ybhP	0.739405	0.257058	0.406889	0.0376034	0.426621	0.942969	0.501767	0.174974	0.843396	0.586707	0.890447	1.1288	0
pth	0	0	-0.22285	0.445312	-0.385682	0.153533	0.184705	0.369142	0	1.1275	0.755784	-0.0124896	0.21197
ulaA	0.114199	0.31048	0.0340637	0.130045	0.678337	0.158308	0.333073	0.299334	0	1.12654	0.702155	0.637716	0.293152
yeaI	-0.330477	0.374898	-0.0676345	1.12528	-0.0587728	0.811301	0.24969	-0.24134	0.0912855	-0.39747	0.620269	0.706992	0.809232
yohD	0.369667	0.493193	0.166831	0.00896557	0.273431	0.169796	0	0	0	0.895976	1.12507	0.56368	0.22268
insJK-1_1	0.400291	0.382852	-0.0501594	1.12456	-0.0689856	-0.388639	-0.132978	0.186335	0.521159	0.857111	0.114459	-0.0636045	0.169298
yncL	0	0	0.127099	0	0.298937	0.657509	1.12419	0.548172	0.63585	0.609067	0.648168	0.0792527	0.152344
yfbS	0.359874	0	0.100531	0.587026	0.1344	0.713559	0.486527	0.365697	0.69282	1.12381	0.299646	0.388194	0
yjcE	0.124159	-0.392121	-0.291145	0.282533	-0.434217	0.32354	0.323868	1.12314	-0.0649652	-0.11443	0.374324	0.0737886	0.10602
leuC	-0.41408	0.160647	-0.225781	0.171878	-0.0599775	0	0.329332	0.329996	-0.0697956	1.12077	0.604313	0.978136	0.317856
cydD	-0.420476	-0.463291	-0.344195	0.028178	-0.314965	0.101498	0.396938	0.552141	0.948122	0.7866	1.12035	0.0982152	0.744128
yihV	-0.390472	0.21245	0.267012	0.295045	0.191448	0.216409	0	0.091321	0.872108	1.12021	0.396062	0.328554	-0.125884
ycfM	0	0	0.0342477	0.236676	0	0	0	0	0	0.149598	0.523291	1.11704	0
priA	0.0727915	-0.154574	0.0717942	0.0664722	0.0206652	0.263377	-0.11645	-0.0545992	0.0547769	1.11536	0.573093	0.340055	1.06256
prkB	0	0.317433	0.0760514	0	0.0392054	0.0250538	0	0	0.403213	1.11518	0.751778	0.464582	0
glxK	-0.0483678	-0.255074	0.140587	0	-0.0497162	0.0341076	0.0588124	0.234786	0	1.0782	1.11467	0.197575	0.189725
ychJ	0	0	0	0.469245	-0.00922289	0.0827765	0.148683	0.127105	0	1.11319	0.372418	0.537032	0.0407127
zwf	0.0327059	-0.235769	-0.627335	0.315505	-0.855554	0.585068	1.11193	0.550057	-0.579293	-0.165568	-0.82042	0.43865	0.448988
yijF	0	0.128078	0.143494	0	0	0	0.135279	0	0.407175	1.1109	0.824714	0	0.144802
yfeA	-0.258794	0.386501	0	0	0.0502345	-0.558623	0.443309	0.198926	1.11077	0.884184	0.970121	-0.169426	-0.795189
nagA	-0.139016	0	0.0117612	0.408783	-0.0293789	0.276757	1.0212	0.564211	0.41273	1.11047	0.499258	0.179299	0.229051
creD	-0.791335	0.186946	0	0.157532	-0.311433	0.271442	-0.187948	0	0	1.1039	0.440981	0.172829	-0.0200699
mtn	0.0421298	-0.128549	-0.127768	0.18991	-0.186251	0	0.36676	0.0426901	1.10142	-0.277484	-0.0569526	-0.0189041	0.102918
ybiJ	0.230093	0	-0.0482444	-0.271752	-0.209715	0	0	-0.060681	0.711359	1.09967	0.395928	0.679391	0
yafL	0	0.148653	0	0.684235	0	0.163516	0.27906	0.463596	0	1.09723	0	0	0
ybcS	0.483104	-3.40893	-0.674174	-1.54102	-1.6559	1.09586	-0.0676387	-0.863498	-1.87227	-0.177705	-0.819104	0.782952	-0.298713
gntX	-0.325494	-0.168503	0.0779512	0.328141	0.370967	0.331427	0	0.121469	0	1.09541	0.846083	0.0271555	0.217767
inaA	0	0.204366	0.0160844	0	0	0	0.0490746	0.060584	0.0369248	1.09319	0.700983	0.74564	0.615367
rhaA	-0.400609	-0.327085	0.251438	-0.198051	0.436686	-0.425455	0	0.359331	0.273127	1.09088	0.369425	0.299621	0.00498073
valU	-0.464043	-0.0576805	0	0	0	0.599582	1.09066	0	-0.172634	0	0	-0.97465	0
yihS	0.213433	0.649206	0.115473	0	0.333741	0	0.299268	0.806301	-0.156601	1.08992	0.497777	0.330643	0.670046
gdhA	-0.687259	0.44823	0.231782	0.322684	0	0.0833106	0.5271	0.213907	0.451236	1.08954	0.634763	0.730569	0.584319
ybl98	0.0866834	-0.0216616	0.0233793	0.124524	0.772399	0	0.014868	0.700621	0	0	0.761584	0.820929	1.08946
umuC	0.366038	0.788078	-0.121474	0.387045	0.192204	-0.0968434	0.191809	0.0752195	0.34418	1.08699	0.914154	0	0.916884
yjiA	0.314436	0.167561	0.158681	1.01196	0.406331	0.277138	-0.0502272	-0.0959444	0	1.08655	0.246229	0.417105	0.138306
kbaY	-0.291265	0.661532	0.0421175	0.0510726	0.64179	-0.149888	-0.054963	0.0746241	0.87609	0.967068	0.811516	1.08624	-0.0297033
yacH	0.633252	0.322173	0	0.613748	0.029896	1.08518	0.285442	0.911601	0.531455	1.01708	0.90855	0.338317	0.157651
ydhS	0	0	0	0	-0.0845933	-0.241402	0	0.27078	-0.218309	-0.0973937	-0.0705861	-0.0490551	1.08501
glcB	-0.429826	0	-0.486917	0.0440608	-0.606923	0.179905	-0.166451	0.308926	-0.508453	1.08493	0.376081	0.107169	0.366947
napH	-0.493778	0	0.260609	-0.269537	0	0.0014865	0	0.0611773	0.980103	1.08276	0.0534942	0	0
glpF	0.304233	0.568471	-0.29492	0.918342	0.0555294	0.65086	0.535073	0.631967	0.0844582	1.08251	0.454006	0.252686	0.464594
rssB	0	0.333014	-0.0801598	0.296542	-0.409327	-0.35122	0.231084	0.347996	-0.275639	1.08179	0.411303	0	0.758415
napA	-0.689089	-0.439398	-0.0606499	0.362376	-0.899505	-0.0540629	1.0808	-0.734977	0.446168	0.567327	-1.35283	-0.242516	-0.980748
rluE	0	0.0682016	0.43702	0.354962	0.258326	0	0.458616	0.437638	0.829664	1.01106	0.616868	0.590833	1.08026
ybl96	0	0	0.147155	-0.434265	1.07922	-0.146391	-0.187227	-0.440605	0	0	0.495459	0.423053	-0.607023
entC	-0.497463	-0.507782	0.170018	0.436455	0.0695376	0.391442	0.615911	0.382663	0	1.07742	1.03538	0.136717	0.438089
recT	0	0.261019	0.024418	0.50658	0	0.551226	1.02953	0.820794	1.07613	0.618946	0	0.221409	0.368784
xdhB	0	0	-0.0235165	0.248112	0	0.209924	-0.0712887	0.283362	-0.0817309	1.07609	0.735471	0.0107437	0.028868
atoB	0.0475497	0	0	0.090222	0.131162	0.167045	0.165461	0.37671	0.182414	1.07572	0.266014	0.094042	0.416192
ygcO	0	0.102239	0	0	0.318765	0	0	0	0.370801	0.328222	1.00321	1.07556	0
prmB	0.0508799	0.38655	0.248985	0.0649444	0.0695477	0.155545	0	0.226505	1.07533	0.662875	0.532558	0.0472952	0.125148
rpoS	-0.0822217	0	-0.139078	0.229931	0	0.0151842	0.110686	-0.188764	1.07411	0	0	-0.0704858	0.112698
ugpA	0	0.265319	-0.0440653	0.470764	0.0817037	0.478308	0	0.0697909	0.0440682	1.07221	0.11632	0.480229	0.0790344
allS	0	0.289602	0.312922	0.0326032	0.155134	0.230852	0.420453	0.399589	0.529204	1.07217	0.532465	0.0335136	0.0481567
fieF	-0.658407	0.171931	0.0118517	-0.260158	0.0653536	-0.16156	0	0	-0.0243832	1.07046	0.190587	0.0449864	0.459758
aldB	-0.426336	0.364325	0.118814	0.183026	-0.0192702	0	1.06997	0.127837	0.00378954	0.418842	0.414887	0.10772	0.143874
yhhH	0	0.0646139	0.0162809	0.593313	0.184331	1.06995	0.309749	0.0624802	-0.107626	0.536144	0.34706	0	0
hicB	0	0	0	0	0	0.35204	0.149967	0.0205889	0.321101	1.06932	0.564573	0	0.269668
php	0.0359134	0.00503543	0.245389	0.128132	0.130783	0.384185	0.530278	0.227771	1.01314	1.06817	0.183485	0.580435	0
dnaX	0	0.357818	0	-0.106316	0.0246655	0.206569	0	0.286217	-1.01903	0	0	1.06744	-0.0171723
ydcX	0.149291	0	0	0	0	0	0.0102221	0	0	0.543681	0	1.06694	0
yejB	0.274169	0.211974	0	-0.00404258	-0.0589522	0.0550326	0.285954	0.000163772	1.0668	0.0248656	0.161784	0	0.197174
hscC	0.0443171	0.149782	0.514028	0.220901	0.353358	-0.324858	0	0.332713	0	1.06589	0.596087	0.607255	0.384377
ybl33	0	0	0	0	0	0	0	0	1.06567	0.0903391	0	0	0.210327
codA	-0.268493	-0.557025	-0.0289309	0.0900552	-0.178452	-0.117963	0.00909523	-0.193629	0.78987	1.0628	-0.155817	0.224191	-0.154832
frlA	0.431842	0	0	-0.0513111	0	-0.24128	0.588362	0.256888	0.852415	1.06253	-0.294181	0.18126	-0.66166
yohJ	0	0	0.238588	0.309113	1.0333	0.358206	0.978761	0.622742	0.255625	1.06219	0.654409	0.852891	0.430285
yeaD	0.518875	0.10818	-0.0616059	0.128723	0.299096	0	1.0236	0.0107223	-0.0153751	0.982739	1.06173	0.919084	0
pabC	0	-0.103463	0.101223	0	0.144307	-0.053212	0.184014	0.0378012	0.270224	1.0614	0.265746	0.277979	-0.124386
cspD	0.0208316	-0.389701	0.0574775	0.25175	0.106612	0	0.0137578	0	0.44524	1.06064	0	0	0
yijE	-0.319977	0	0.116727	0.336827	0.426538	0.342542	0.65258	0.365473	0	0.243891	0.215935	1.06024	0.314574
yddB	1.05983	-1.46297	-1.28667	0.338802	-0.879867	0.234465	0.878321	0.0824622	-1.51127	-0.0390998	-0.458106	-0.854802	0.0622843
holB	0.428887	0.507785	0.101222	1.05913	0.0556995	0.049815	0.180967	0.667375	0.0852549	1.00259	0.458622	0	0.0694852
panC	0	0.0405418	0.0938443	0.026541	0.103496	0.384668	0	0.0832326	0.0534112	0.988453	1.05883	0.650234	0.211711
ascF	-0.785	-0.136806	0.0303974	0.371406	0	0	0.0145274	0.323904	0	1.05808	0.716074	0	0.262325
nuoE	0.0189574	0.580968	0.0818538	0.234342	0.154333	0.077122	0.0923774	0.236443	0.600798	1.05783	0.16072	0.33607	0
argY	0	0.187365	-0.0425943	1.05763	0	0	0	0.147169	0	0.574349	-0.514465	-0.655178	0
tnaA	-0.0311641	0.563773	0.0679866	0.324637	0.09364	0.178991	0.113174	0.568613	1.05716	0.339507	0	0.0170889	0.295159
yfbU	0.123618	-0.286714	0	0.0983311	-0.188541	0	0	-0.602784	1.0569	0	0.174772	0	0
yigZ	0.136362	0.155107	0	-0.0171477	0.171821	0.468635	0.162274	0.0438226	0	1.05683	0.762412	0.257926	0.0107774
ndk	-0.17633	0.0432946	0.13707	0.528332	-0.0498555	0	0.347137	0.254535	-0.288159	1.05681	0.797514	0.185364	0.160947
tolB	0.735393	-0.602247	-0.247517	0.142885	0.716133	-0.187475	-0.650928	1.05581	-1.59988	-0.31672	-1.16271	-0.641112	0.433181
ygiF	-1.91448	-0.96004	0.136592	-0.708744	-0.138402	-0.603952	-0.312786	-0.228419	-0.582342	1.05573	0.71396	-0.0650395	-0.104086
rutG	-0.166544	-0.0741154	0.111686	-0.0654137	0.0107356	0.0633985	0	-0.0162686	0.101713	1.05466	0.396275	0.547746	0.328619
pgaB	-0.429181	-0.681576	0.154339	0.18011	-0.0111291	0.457151	0.202637	0.305148	-0.722572	-0.0690205	0.669137	-0.632116	1.05457
zapA	-0.374499	1.05429	0.14383	0	-0.47082	0.889405	0.633036	0	-0.316128	-0.72304	-0.329451	0	0
glnB	-0.0245262	0	0	0.182887	0	0	1.05402	0.496342	0	0.444152	0	0.0519613	0.174069
fabF	-0.166055	0	0	-0.44242	-0.122595	0.404221	-0.284278	-0.381767	0.378301	0.15059	0.502823	1.05351	-0.357714
yejO	-0.238366	-1.11712	0	-0.0316616	0.345578	1.05272	0.17188	0.0424807	0.0107269	0	-0.789201	-0.556594	0.0111089
uxaA	-0.705495	-0.198545	0.0754978	0.100526	0	0.0852571	0.108856	0.3456	1.05233	1.03118	0	0	-0.325832
rffT	-0.0134666	0.0871065	0.0631398	0.0500848	0.190796	0	0.0344333	-0.0396714	0.858858	1.05202	0.394705	0.487965	0
fecC	0.307909	0.316868	0	-0.0168864	0.12221	0.593094	0.162174	0.0956541	1.05027	0.818173	0.463566	0.515096	0.0175869
yjcH	0.209687	0.208499	0	0.721314	0.151856	0.0884292	0.160181	0.211424	0.162369	1.04982	0.293026	0.526982	0
dctA	-1.41402	-1.19501	-0.593582	1.04951	0.24748	0.171252	0.62713	0.121854	0.252901	0.850276	0.964292	-0.452282	0.732751
hyfR	0	-0.0476836	0	0.831571	0	0.601756	0.540922	0	0.863797	1.04939	0.605926	0.364372	0.313338
selD	-0.356913	-0.0797146	-0.0276425	-0.0957491	-0.0624136	-0.345723	0.0613379	0.337802	0.543499	1.04927	0	0.134631	0.463222
yjeI	0.00297578	0.941362	0.332595	0.581934	0.346174	0.592214	0.204062	0.348958	0.125352	0.846758	1.04878	0.745915	0.183217
aroB	-0.0744501	0.0309731	-0.196864	-0.0509214	0.213392	0	0.489868	0.863458	0	1.0468	0.377265	0.255783	0.344658
yccT	0.0530463	0.262009	0.44742	0.571055	0.587534	0.352237	0	0	0	1.04543	0.693673	0.365988	0.558851
phnK	-0.172034	0	0	0.00318084	0.0999858	0.10417	0.14763	0	-0.452606	1.04509	0.375677	0.0662639	-0.324169
yhaC	0.292371	0.470514	-0.0254445	-0.0561041	0.498796	-0.259984	0	0	0.464859	0.0535203	0.307484	1.04473	0
yehY	0.000634884	0.530256	0.176289	0.0872867	0.138138	0.178314	0	0	0.264388	1.0445	0.571633	0.544732	0
yijP	-1.95873	-1.25357	0.0519596	0.117455	-0.679601	0.782487	0.648869	1.04383	-1.03318	0.0271603	-0.293922	-0.517143	0
yjjA	-0.111062	-0.440553	-0.0358867	0.16636	-0.872197	-0.219355	-0.275499	1.04376	-0.103658	-0.469488	0.0367327	-0.852257	-0.142351
focA	-0.724719	0.537498	-0.0899009	0.467738	-0.198263	0.665838	0.173814	0.795995	-0.158958	1.04318	0.184194	0	0.154626
pdxB	-0.0839389	0.0584721	0.0706055	0.199087	-0.155649	0.445113	0.0956373	0	-0.0848999	1.04237	0.540107	0.27725	0
ydaC	0	0	0	0.125732	0	0	0	0	1.04206	0.413975	0.197677	0.244528	0
hmp	0	-0.223915	0.365825	1.04199	-0.0777397	0.385743	0	0	0.638119	0	0.220826	-0.398661	0.434052
gsk	0	-0.0165667	0.316071	0.502994	0.143848	0.51952	0.279168	0.0799593	0.0950003	1.04056	0.60527	0	0.576635
bcr	-0.910375	-0.465767	0	-0.349138	1.02019	0.156506	0.0325236	0.229075	-0.128795	0.636453	1.04033	0.781378	0.418539
ynaI	-0.0152986	-0.0362389	-0.21313	0	-0.256542	0.115282	0.0295941	0.123228	1.03992	-0.0554911	0	0	0.183032
leuW	0.381725	1.03953	-0.784167	0.141119	-0.251836	0.0298482	0	-0.63236	0	-0.996031	0	0.101027	-0.894647
ydaW	0.671464	0.0038551	0.199333	0	0.0922509	0	0.148274	0	0	0	1.03927	0	0.74841
hyfG	-0.0317895	0.452211	0	-0.107748	0	0.113279	-0.0592674	-0.348211	0	1.03813	0.473525	0.163832	-0.0204727
folB	0	0	0	0.083579	0	0.113047	1.03723	0	0.604994	0.47744	0.458298	0.425324	0.210491
ybl54	-0.121054	0	0.196103	1.03711	0	0.932508	0	0	0	0.37232	0	0.615668	0
mhpC	-0.0676143	0.431048	0.113537	0.139585	0.169535	0.0470379	0.526511	0.661029	0.0453541	1.0333	0.503782	0.4912	0.569453
napG	0	0.149408	0.185937	0	0.558195	0.153874	-0.193712	0	0.427215	1.0328	0.975446	0.746824	-0.385144
yhdE	0	0.175978	0.133148	0.0592018	-0.068761	0.404431	0	0.034828	0	1.03266	0.0934802	0	-0.00395638
yhiQ	0.133874	0.458513	0.0922118	0.302341	0.67675	-0.0367881	0.300963	0.0280618	0.136667	0.846525	0.931048	1.03262	0.247558
thrW	-0.197279	0	0	0.114022	0	0	0.0914689	0	0	1.03236	-0.0513266	0	0
yedW	1.03182	0.187086	-0.221572	-0.596103	-0.566845	0.29956	-0.0565835	0.469485	-0.861216	-1.974	-1.39301	-0.0892673	0.934734
yihN	0	0.0131753	0.0587154	0.360034	0.288484	0	-0.0632186	0	0.513808	1.03072	0.577588	0.357295	0.604281
rtn	0.0985581	0.282396	0.113256	0.347121	0	-0.227179	0.188664	0.266782	0.152771	1.02935	0.0958701	0	0.74992
yhhN	0	0	0.114881	0.00646009	0.592031	0.193769	0.263063	0.19454	0.0847835	1.02897	0	0.103328	0
potI	0.115128	0.392776	0.465107	0.454497	0	0.420289	0.193259	0.681183	0.419797	1.02824	0.779775	0.261715	0.0335329
yjgM	-0.251456	-0.312958	-0.366538	0	-0.0743625	0.224737	0	0	0.32488	0	0.531152	0	1.02805
ytjA	0	0	0.230415	0	0.624876	0.159305	0	0	0.781853	1.02786	0.345266	0	0.0202725
yiaC	0.260665	0.179555	0.151716	0	0	0.428708	0	0.435219	0.337436	1.02696	0.488261	0.192044	0.448814
xerC	0.162078	0.0920948	0.17241	0	0.0110049	0.372297	0.0810477	-0.157209	0	1.02225	0.765453	0	-0.00626674
yhjB	-0.864826	-0.0926304	-0.637224	0.542011	0.366875	0.844531	1.02224	-0.272456	-0.38907	0.204881	0.283286	0.493018	0.289769
yjbI	0	-0.299934	0.0405551	-0.454449	0.389526	0.207238	-0.348073	-0.032042	-0.136564	0.147827	0	1.02172	0
cbrC	0	0	0.158493	0	0.327047	0.00580211	-0.0971719	0.0838185	0	1.02083	0	0	0.38424
purH	-0.484895	0.440342	-0.112185	-0.0570054	0.364364	-0.0642567	-0.551471	-0.0348816	0.117122	0.723251	1.01971	-0.0376608	-0.206037
uvrY_2	0.0748664	0.577713	0.124109	0.295591	0.213989	0.250056	0.400607	0.730934	0.263138	0.810784	1.01792	0.101217	0.00462461
ycaD	-0.236831	0.336747	0.133844	0.726797	0	0	0	0.00987231	0	1.01632	0.504353	0.606424	0.461023
yicG	0	0.120417	0.0229297	0	-0.16785	0.0804268	0	0.0712913	0.426171	1.01631	0.170364	0.0609744	0.215947
djlC	0	0.292356	0.0473243	0.0550943	-0.229145	-0.394399	-0.0387436	0.165638	0.500717	1.01606	0.531486	0.0875364	0.1502
ybaQ	-0.527249	0.0870908	0.179033	0	0.529866	0	0.561736	0.447554	0.0478188	0.887082	0.418144	1.01446	0.802597
rutD	0	0.401854	0.0408763	0	0	0	0	0	0.13254	1.01434	0.462417	0.39743	0
ycjF	0	0.700188	0	0.119859	0	0.553263	0	0.136895	0.193413	0.792269	1.01381	0.20853	0.292884
ybhN	0	0	0	0.210045	0.194461	0.0444219	0	0	0	1.0116	0.485086	0.467882	0.073643
araD	-0.0622789	0.259365	0.02943	0	0.0658889	0	0	0.120868	-0.217583	1.01142	0.634622	0.0643896	0
speD	0	0.00562792	0.0451275	1.01052	0	0	0.231103	0.130153	0	0.0121909	0.114689	0	0.0669152
glnG	-0.113566	0.0973264	-0.100686	0.0492496	0	0.186917	0.0135508	-0.161063	0	1.00923	0.0353097	-0.0428237	0.217725
wzyE	0.131269	0.340851	-0.143402	0	0	0.215463	0.509032	0.0966951	0.0864287	1.00918	0.991356	0.556797	-0.096957
ydiN	0.143656	0.495071	0.0707476	0.472444	0	0.632788	0.261992	0	0	0.813782	0.664149	0	1.00907
yrhD	0	0.586737	0	0.381497	0	0.594283	1.00888	0	0	0	0.516874	0.351249	0
kduD_1	-0.473777	0	0	0.49001	0	0.190686	0.730889	1.00772	-0.0156771	-0.652143	0.530402	0	0.446342
efeU	-0.500464	0	-0.131118	0.0517299	-0.143867	0	0.089163	-0.0235597	1.0076	0.34163	0.295621	-0.108363	0.177273
yjgF	-0.423308	0	0.0580399	0.0414663	0	0.334676	0.155937	0.185147	0.227774	1.00706	0.388069	0.634207	0.582433
mrr	1.00668	0.511044	0.113236	0	0	0	-0.0299864	0.0705652	0.143063	0.563592	0.546844	-0.027912	0.2509
murD	-0.138205	-0.298817	0.00669103	0	0	0	0	0.266746	0.141021	1.00618	0.673029	0.126366	-0.0619927
yaeR	-0.275503	0.141998	0.145086	0.22721	0.318779	0.109143	0.424345	0.354422	0.278799	0.682783	1.00559	0.201772	-0.0835129
glgX	0.00439706	0.393852	0.118693	0.477563	0	-0.0242902	0	0.0689002	0.519297	1.0044	0.715543	0.763625	0.441187
yghA	0	0	0	-0.0268631	-0.12494	0	0	0	0	1.00122	0	0.413719	0
eutR	0.219061	0	0	0	0.33846	0	0.507179	-0.0996651	0	0.754789	1.00114	0.367447	0.1865
cmr	-1.02722	0.875073	-0.248865	0.670191	-0.114276	0.690863	1.00024	0.204959	-0.531182	0.367724	0.0696542	-0.045852	0.549499
yhjK	-0.318137	0.315594	0.529219	-0.141135	0.176201	0.237536	-0.118608	0.0669106	-1.45862	0.999851	0.410239	0.262049	-0.194557
ypfN	0	0	-0.116713	0	0	0	0.00540372	0.00804137	0.169785	0.998131	0	0	0
ebgC	-0.185842	0.0998228	0.114367	-0.22813	0.288664	0.210785	-0.23247	0.302559	0.357898	0.959686	0.99667	0.440415	0.318144
ybl115	0.26526	0	0.103513	-0.616082	0.996462	0.0424978	-0.098318	-0.140891	-0.491456	-0.258263	0.0166335	0.441032	0.061285
flgM	0.0123578	0.228931	0	0	0	0.254427	0.675183	0.117378	0.270913	0.996326	0.304419	0	0
mcrC	0.0982285	0.308098	0.191973	0	0.472296	0.489821	-0.10676	0.443099	0.308571	0.546508	0.649925	0.995439	0.550359
fiu	0.0756761	-0.220851	0.0519667	0.0729567	-0.101345	-0.00849335	0	0.84506	0.994201	0	0.467761	0.966677	0
suhB	0.483707	0.765193	0.182814	0.647865	0.282877	0.510918	0.52807	0.193024	0.647374	0.836392	0.993465	0.182283	0.44795
lysU	0.0709746	0	-0.202574	0.344812	-0.840036	0.797535	0.672486	0.99241	0.264891	-0.360603	0	-0.582713	0.420844
grpE	0	0	-0.0767865	0.388078	-0.890178	0.312846	0.419853	0	0.991573	0	-0.126955	0	0.292761
galU	-0.420074	-0.322056	0.237532	0	0	0	0	0.0862433	0	0.644951	0	0.987836	0.697566
rfbA	0.326818	0.381535	0	0.13862	0	0	0.85774	0.0440242	0.424711	0.986117	0.177186	0.599594	0.260033
yfaV	-0.163721	0.122588	-0.03479	0.135582	0.0952609	0	-0.206397	-0.0435518	0.985951	0.824521	0.31735	0.316585	0.652018
yhgA	0.131719	0.821984	0.119292	0.558462	-0.00461964	0.251535	0.224105	0.296706	0.196175	0.984481	0.579833	0.112618	0.209876
actP	-0.375658	0.021567	-0.181994	0.0099231	0.096283	0.279331	-0.0421033	0	0.435153	0.981482	0	0	0.482318
uof	-1.15754	0	0	0	0	0	0	0	0	0	0.616198	0.981306	0
rfbB	0	0.398356	0	-0.129685	0	0	0	0.0616989	0.980438	0	0.12871	0	0.089986
tyrV	0	0.447176	0	0.362929	0.0853756	0.919766	0.340795	0.979145	0.568942	0.45458	0	0	0
ynhG	-0.0768577	-0.977481	0	0.978991	-0.0319588	-0.599091	-0.288568	-0.0844272	-0.796877	0	0.363979	0	0.0594731
yfdE	0	-0.371405	-0.101567	-0.493014	-0.326566	-0.348101	-0.240055	0.0927614	0.977163	-0.0664707	-0.0428199	-0.241878	0.109592
yihT	0.0042934	0.330822	0.158247	0.383177	0.361291	0.274773	0.376768	0	0.407375	0.784741	0.338467	0.976708	0
ydhJ	0	0.0147827	0.0918845	0	0	0.341231	-0.0920807	-0.0135427	-0.0424825	0.976354	0.187005	0.104698	0.121491
nadK	0.293115	0.38837	0	0.543469	-0.347032	0.283797	0.215196	0.159928	0	0.975603	0.315584	0.546486	0.891253
rlmD	-0.198321	0.220196	0.119033	-0.0116984	-0.115826	0.487386	-0.18117	0.22696	-0.207581	0.975024	0.333422	0.402616	0
gatZ	-0.107946	0.0464216	-0.116536	-0.197143	-0.34438	0.658118	0	0.0495747	0.261753	0.97461	-0.212132	-0.318989	0.527004
yfcA	0	0.282694	0	0	0	0	0.256655	0	-0.528149	0.972618	0.380445	0	0.137478
usg	0.229468	0	0.101647	0	0.12588	0	0.507243	0.370191	0.406222	0.972584	0.503372	0.2335	0.629293
glpT	-0.0502891	-0.120891	-0.344195	0.472593	-0.0795191	0.176005	0.704106	-0.243769	0.43093	0.971778	-0.276746	-0.167324	0.0303894
hslV	-0.00906675	0.066351	0	0.486199	0.0405217	0.808606	0.320986	0.155213	0.289365	0.97101	0.17338	0.369677	0
lolD	-0.0200046	0.0990202	0.0724076	0	0.0714781	-0.250942	0.0404283	0.0295096	0.845183	0.97078	0	0.0020601	0.0592671
rne	-0.286844	-0.312147	-0.277861	0.296982	0.730389	0.970253	-0.970854	0.692719	0.446906	-1.08092	0.31721	0.103378	-1.20193
manX	-0.269604	-0.876309	-0.192528	-0.00943832	-0.306675	0.0599724	0.836636	0.441379	0.308154	0.0757855	-0.389855	0.970176	0.954305
bglA	0	-0.050177	0.0792827	0.415303	-0.176691	-0.111831	0.410804	0.969595	0.416466	-0.00173807	-0.18957	-0.245477	-0.104382
ycjN	-0.0477872	0.218766	0.19994	0	0.351375	-0.3235	-0.238972	-0.0345258	0.447912	0.969507	0.776227	0.458188	0.0282376
xdhD	-0.608662	0.327729	0.129803	0.433344	-1.26313	0.621488	0.472863	0.969485	-0.755768	-0.0943381	-0.718811	-0.967779	-0.843174
zraP	0	0.313588	0.228618	0.132688	0.219234	0.539121	0.589028	0.395618	0.102221	0.969195	0.899111	0.601	0.386815
yaaA	0	0	0.0488111	0.00851988	0	0	0.0963508	0	0.123514	0.968745	0.814339	0.483794	0.102022
recD	0.140163	0.52784	0.0736566	0.436962	0.00644538	0.93153	0.269845	0.428072	0.259122	0.966505	0.727437	0.457011	0.323188
pitB	-0.311749	-0.512433	-0.0239173	0.0180066	-0.293693	-0.335413	0.966193	0.0109155	0.00689042	0.125447	-0.2648	-0.799673	0.26237
nusB	-0.950596	0.118065	0	0.394833	0.440776	0.263657	0	0.395096	0	0.965592	0.699331	0.612489	0
yhjV	-0.636804	0	-0.0870055	0.265178	-0.231358	0.0992436	0.475927	0	0.323673	0.964636	0	0	0
adrA	-0.177138	0	0.0453711	0.515208	0.118473	0.363766	0.150773	0.20981	-0.701204	0.963706	0.481184	0.512443	-0.141959
gsiB	0	0.531596	0.0410375	0.412914	0	0.391477	0.838807	0.0835379	0.32485	0.963673	0.628555	0.652486	0.0807205
pstS	-0.0764571	0.00301798	0	0.0126905	-0.00914476	0	-0.0709627	0.141401	0.114531	0.963574	0.318978	0.140605	0.304437
ybl3_2	0	0.334156	0.158461	0.203054	0	0.224396	0	0.154889	0	0	0.417516	0.114021	0.963564
pulG-3	0	0.102896	0	-0.134312	0.45201	0	0.285613	0.365659	-0.253285	0.96302	0.161191	0	0.931136
yihQ	-0.0486583	-0.33897	-0.473073	-0.920371	-0.421169	-0.871347	-0.419158	0.00263362	-1.24302	0.961835	-1.13698	-0.491349	-0.0402649
narV	0	0	0.0670676	0	-0.215443	0.0875683	0.179496	0.105529	0.178669	0.95899	0.273256	0	0.22984
yfcM	0	0	0	0	0	0.0166492	0.0254507	0.229265	0	0.958564	0.0842258	0	0
ftsN	-0.437163	0.0359297	-0.0861882	0	0.595501	0	0	0	0.449592	0	0	0.958309	0
frr	-0.407691	0	-0.254146	0.346002	0	0.463243	0.534935	0	0.157912	0.957645	-0.257055	0.0622603	0.452007
rfaE	0.890609	-0.557184	0.203617	-0.221291	0.218511	0.234916	0.175146	-0.0223876	0.0571389	0.957386	0.528334	0.791466	0.197573
iclR	-0.311345	0.229785	0.103353	0	0.18747	0.00338501	-0.109244	0.237355	0.0672578	0.95713	0.323782	0.589124	0.229243
yfjD	-0.542031	0	-0.433986	0.0976065	0	0.158319	0.314712	0.730768	0	-0.510807	0.344089	0.771892	0.955773
ydcW	-0.542556	-0.44198	0.286131	0.0681079	0.156838	0	0	0	0.200872	0.955305	0	0	0.855335
pgaA	-0.213531	0.954753	0.106895	-0.0198196	-0.365526	-0.374156	0.231699	0.304323	-0.543038	-0.85524	-0.883155	-0.941558	-0.334338
maeA	0	-0.189203	-0.0885646	-0.00555215	-0.0705954	0.079689	-0.01368	-0.134235	0.954724	0.348001	-0.0300781	-0.0853004	-0.344631
sdhC	-0.583639	-0.142385	-0.496393	0.0780692	-0.966481	0.200772	0.95417	0	0	0	0	0	0
yqeC	0	0.013044	0	0.233788	-0.180354	0.294087	0.206037	0.146735	-0.0421063	0.953991	0.699559	0.0443553	0.606471
ybl2	0.103499	-0.0459812	0.145167	0	0.476114	-0.0130632	-0.204462	-0.246541	0.610136	-0.257442	0.10545	0.952901	0.434127
yeaC	0	0	0.0601955	0	0	-0.209895	0.114645	0	0.952713	-0.18217	0	0	-0.0171475
cstA	0.952182	0	0.37399	-0.152316	0.0607192	0	0.895706	0.462422	0.655287	0.435965	0	0.353271	0
yhhS	-0.240376	0.294121	0.132221	0.238153	0.409504	0.19794	0.285992	0.285263	0	0.951547	0.823489	0.858615	0.189699
yieK	0	0	0.0855073	-0.147182	0.31966	0.257288	0	0	0.683929	0.514409	0.951295	0.623729	0.294461
yqjI	0.0117712	0.247568	0.0367317	0.157954	0.107331	0.104973	0	0.271363	0.334057	0.95117	0.310931	0.220817	0.199277
nfi	0	0	0	0	0.0122265	-0.10138	0	0	0.0444437	0.947256	0.418703	0.208718	-0.150361
frdB	-0.669899	-0.0763605	-0.197612	-0.648126	0.205607	-0.170774	0.530291	-0.326636	0	0.947179	0	-0.109952	-0.377565
barA	0.381319	-1.4472	0.0635388	-0.932059	-0.433206	0	0.394093	0.692272	-1.28052	-0.272078	0.448693	-0.281292	0.946538
yfgC	0.158151	0.0316214	0	0.188011	0	0.509319	0.36548	0.527635	-0.648419	0.945996	0.499054	0.0136984	-0.100249
hofC	-0.189018	0.133737	0.0391338	-0.213634	0.0116278	-0.448239	0.845579	0	0.682122	0.94571	0.00606584	-0.613682	0.220995
uup	-0.454854	0.240744	0.158008	0.340912	-0.0044748	0.503652	0.454392	0.599523	0.261127	0.945103	0.753762	-0.0824246	-0.0441256
yneN	0	-0.264459	0.104997	0.288273	0.195359	0	0.099203	-0.149035	0.230035	0.0978481	0	0.945074	0
basR	0.143541	0.11911	0.000384407	0.0784998	0.320338	0	0	0.0831686	0.831279	0.748817	0.943852	0.707185	0.4428
pgpA	-0.0545704	0.00108294	0.0811875	0.316721	0	0	0.277772	0.0466307	0.943239	0.329191	0.371798	0.423823	0.361334
entA	0.0961142	0.572805	0.340335	0	0	0.494241	0	0.38094	0.158777	0.16225	0.463389	0.660069	0.942513
yhbT	0	0	0	0	0.00618583	0.62825	0.0505581	0	0	0.942311	0.532425	0.0865942	0
yjhB	0.135695	0.23143	-0.279414	-0.0923616	0.684808	0.0765552	-0.052842	0.349419	0.942163	-0.0541988	0.675345	0.923677	-0.262987
alaT	-0.222771	0.786921	-0.299808	-2.16619	-0.684422	0.0513992	-1.62667	-1.42253	0.937929	0.0408685	-0.226135	-1.55244	-1.44271
ybbB	0	0	0.0585247	0.817851	0.242619	0.0498235	0.514924	0.570449	0.0269291	0.482486	0.937601	0.465817	0
ghrA	-1.09415	-0.76509	0	0	-0.200114	0.00826829	0	0	-0.257164	0.935715	-0.534787	-0.309272	0.559968
csiE	-0.275785	0.457961	0.0784939	0.618653	0.471153	0.360025	0.0981918	0.254798	0	0.934222	0.758551	0.602121	0.432472
norW	0.576281	-0.138689	0.212488	0.136339	0.549847	0.883225	0.586215	0.327615	0.496733	0.87245	0.933236	0.315838	0.820653
dgoD	0.0236169	0.533646	0	-0.148438	-0.0591606	-0.0471342	0.309562	0.270857	0.932579	0.563532	0.784594	-0.0125964	-0.0657594
ygcR	0	0	0.0864553	0.102229	0.108924	0	0.307714	0.167476	0.342047	0.932526	0.0405758	0	0.320352
ynfL	0	0	-0.00329375	0	0	0	0.260348	0.0256127	0	0.931347	0.208274	0.350032	0.140908
thyA	-0.234426	0	0	0	0	0	0.146818	0.00155804	0	0.930792	0	0.12496	0
ynfE	-0.260787	-0.0498234	0.128188	0.521186	-0.0589755	0.384392	0.930033	-0.16827	0	0.887705	0	0	0.0429865
flgF	0	0.150556	0.191227	0	0.0457503	0.127284	0	0.314023	0.0761854	0.929588	0.361873	0.0158945	0.0978398
yfcUT	-0.0336864	-0.793732	-0.0753251	0.702374	0	0.00899619	-0.289789	-0.00516655	-0.16018	0.929513	0	-0.132205	-0.459586
fimH	-0.453533	0	-0.0431023	0	0.327568	0	0	0.292385	-0.0500033	0.928841	0.161736	0	0.370267
ampD	-0.0999285	0.356732	0.468461	0.570947	0.199304	0.275065	0.0875484	0.100316	0	0.92869	0.859867	0.229772	0.0962472
sufD	0.363391	0.374001	0.108097	0.578764	0	0.897969	0.354634	0.542926	0.310615	0.928393	0.0706492	0.0650905	0.348238
gyrB	-0.471432	-0.278139	-0.530278	0.890436	0	0.719594	0.696783	0.762578	0.439635	0.301998	-0.320204	-1.12467	0.927857
ispG	0.211624	-0.0202601	0	0.00141922	0	0.341926	0.182822	0.295431	0	0.42518	0.927653	0.303084	0.587918
fhuA	-0.46434	0.181933	-0.160659	-0.648741	-3.70953	0.452405	0.128018	0.336569	-1.24658	0.92747	0.0930763	-1.98634	0.211655
trmI	0.0498927	0	0.0294888	0.0437218	0	0.338712	0	0.0757852	0.0329114	0.926101	0.607868	0	0.445411
ompR	0.114942	0.180225	0	-0.0393108	-0.0620805	0	0.169253	-0.0297	0	0.926018	0	0	-0.0137616
yahG	-0.116145	0.294904	0.0988072	-0.0412681	0.0470413	-0.295288	-0.0173927	0.0586125	0.308434	0.924162	0.19223	0.0258763	0.0791351
ydjJ	0.0875033	0.592811	0	0.373027	0.107166	0.426038	0.470454	0.0968376	0.898913	0.922794	0.693953	0.322197	0.588836
eamA	0	0.16665	0.0830512	0	0.335243	0.921775	0.24489	0.781798	0.499658	0.175676	0.89986	0.701777	0.473565
yhiN	-0.0677341	0.493381	-0.0796015	0.283468	0.0956507	0.247781	0.439329	0.230541	0.059703	0.920747	0.485476	0.459987	0.500193
mdaB	-0.0094666	0.0246704	0.0485153	0.198526	0	-0.0567418	-0.0288629	0.0186315	0	0.919873	0.419246	0.307968	0
yihA	0.0651109	0.104727	0.0590563	-0.289658	-0.246546	-0.686476	0.352104	0.322485	0	0.200923	0.558187	0.91891	0.551781
fsr	-0.967681	-0.561368	-0.133338	0.0172544	0.0416792	0.143758	-0.229425	-0.365496	-0.0456798	0.281659	0.918291	0.127089	0.226828
rluF	-0.141193	-0.197568	0	0.918187	-0.296404	0.0259394	0	0.525123	0.0637534	-0.123953	0	-0.341684	0
flhC	0.435872	-0.430135	0.158774	0.460675	0.421995	0.210098	0.853954	0.480644	-1.20096	0.917736	-0.156034	0.749386	-0.30332
rsmH	0	0.0153587	-0.237652	-0.12219	0	0	0.917694	0	-0.323675	0	0	-0.290375	0
hcaT	-0.337611	-0.030909	0.182975	0.202005	0	0.571344	0.417761	0.0760639	-0.241894	0.917624	0.425173	0.0515505	0.309541
ydhW	-0.372908	0.214961	0.185594	0.184756	0.173388	0	0.0241114	0	0.744641	0.917157	0.317266	0.373329	0.0310748
ygdI	-0.62468	0	-0.0246274	0	-0.0652453	0.282955	0.0945685	0.917013	0	-0.314079	-0.431034	-0.390668	0.392522
ribD	0	0.126041	0.276944	-0.310145	0	0.25725	0.916353	0.3597	0.017871	0.471873	0.372123	0.22744	0
xylE	0.915385	0.372406	0.270991	0.137693	0	0	0	0	0.490768	0	0.222644	0.498387	0.0586551
cysW	0.0560971	0.174329	0	0.242435	0.254963	0.0869699	0.0255307	0.255053	0.230937	0.914798	0.165842	0.354171	0.196199
aroC	0	0	0.00534405	0	0	0.253903	0.913994	0.462898	0	0.817952	0.283475	0.3353	0
yhjX	-0.626161	0	0.0431171	-0.0605509	-0.333301	-0.0652371	0.446233	0.284987	-0.309243	0.913973	0	-0.234971	0.330277
yjiK	-0.170216	0.307758	0.0591018	0.0300492	0	0.0719239	-0.124058	0.0506574	-0.196725	0.913746	0.813782	0.351551	0
yccE	0	0.398323	0.0866927	0	0.486475	0.480186	0.41308	0.769136	-0.259565	0.615496	0.345922	0.604805	0.911973
lspA	0	0.0851603	0	0.31327	0	0.149109	0.158808	0.381509	0.018575	0.911047	0.4073	-0.184221	0.507931
tauA	-0.211201	0	0	-0.0959023	0.113707	0.30425	0	0.277639	0.495922	0.842697	0.64351	0.910979	0
hisI	-0.207938	-0.272614	-0.310165	0	-0.279721	-0.038162	0.910903	0.0340504	-0.604028	0	0	-0.128717	0.343139
yncE	-1.04431	-0.633957	-0.266979	-0.220166	-1.00406	-0.0372851	0.910678	0.22593	0.0432774	-0.3842	-1.06717	-0.137525	-0.163351
garD	0.223835	0.640389	-0.00272484	0.814822	0.152644	0.8557	0.451691	0.57773	0	0.444879	0.910027	0.54447	0.202603
rpsM	-0.475804	-0.636037	-0.622292	-0.419225	-0.429141	-1.52356	-0.879706	0.909397	-1.68434	-0.314589	0.00625899	-0.970527	-0.11078
queD	0	0.389965	0.107957	0.14967	0.20464	0.00572047	0.042855	0.129659	0.908438	0.731181	0.61931	0.691882	0.260032
sthA	0.908338	-0.147653	0.104581	0.211869	-0.456117	0.29313	0.464855	0.1555	0.252776	0.163906	0.212466	-0.0378399	-0.060945
ygdT	-0.804881	0	0	0	0	0	0.175904	-0.344028	0	0.326891	0.907885	0.011189	0.110142
yhhX	-0.227026	0	0	0	0.220788	0.239957	0.00876635	0.357662	0	0.429114	0.238767	0	0.907318
hemH	-0.442841	0	-0.12944	0.276318	-0.138191	0.907041	0.678645	0.429296	-0.367575	0	0	0	0.362212
yhaO	0	0.242093	0.0362945	0.268553	0.00151125	0.405946	0.337317	0.326623	0.0734471	0.90647	0.80125	0.826121	0.610737
rffG	-0.374649	0.0754822	0.359698	0.324034	-0.107763	0.319042	0.267125	0	0.894063	0.76947	0.906446	0	0.426936
ybjD	0	-0.0605623	0.249273	0.494345	0.547141	0.238529	0.584664	0.256925	0.651996	0.852408	0.560461	0.906141	0.249654
yjdC	-0.356719	0	0	-0.0970822	0	0	0.235034	0	0	-0.389023	0	0.906057	-0.54779
speG	-0.0134399	0.0127245	0.0542041	0.249314	0.574241	0.659722	0.906045	0.257541	0.31637	0	0.147368	0	0.297249
yagQ	0	0.275109	0	0	0.14836	-0.0349519	0	0	-0.0508259	0.905691	0.078119	0.291644	-0.37546
puuA	0.398282	0.227283	0.173575	0.905093	-0.095701	-0.0589922	0.444613	0.802319	-0.652501	0.227633	-0.224846	-0.792159	-0.149392
ygcQ	0.384535	0.651036	0	0.0710773	0.0163767	0.526867	0.246582	0	0	0.861494	0.904972	0.385221	0
ompX	0.0577365	0	-0.475159	0.0336163	0	0	0.678988	0.146203	-0.941546	-0.11725	0	0	0.904932
pscK	-0.0483234	0.112729	0.156335	0.358078	0.032807	0.425327	0.578976	0.0298733	0.241979	0.0490159	0.904438	0.581423	0.08466
ilvH	0.160467	0	0	0	0.249138	0	0.904432	0	0.139065	0.505663	0.334043	0.116009	0
ycjP	-0.423857	0	0.0414941	0.00266644	-0.246566	0.302255	0.903748	0	0.864068	0.653493	0.132983	0.0253336	0.172422
frdA	-0.0238969	-0.0289541	0	0	0	-0.179524	0.279401	0.0866701	0.903193	0	0.178264	0	0.0291705
rsxD	0.213527	0.478444	0.0326788	0.582306	-0.341584	0.251069	-0.0473888	0.0800327	0.210118	0.902756	0.463074	-0.515561	0.0793546
katE	0.1029	0.37151	0	-1.73361	-0.325477	0	-0.892597	-0.0454785	-0.776327	0.902682	-0.745461	0.0319827	-0.868467
ydjM	0	0.0856408	0	0.112018	0	0.0857243	0.705347	0.360845	0	0.902626	-0.0270867	-0.127679	-0.0446374
yphH	0.405203	-0.123038	0.199339	0.283216	-0.158583	0.142231	0.274351	0.331156	0.122862	0.901828	0.394775	0.326903	-0.296888
iap	0	-0.180822	0	0.485456	0.794704	0	0.818676	0.26729	-0.153496	0.699311	0.901644	0.60381	0.17086
yraN	0.109348	0.208451	0.0762806	0.445189	0	0	0.779982	0.26269	0	0.900422	0.751185	0.174732	0.00843946
gntR	-0.660329	0	0.262508	0.0301254	0.158313	0.20599	0.541478	0.807064	-0.159549	0.900359	0.350823	0.579341	0.12835
evgS	-0.333833	-0.856636	-0.136011	-0.639824	-0.536566	-0.744161	0.899695	0.688798	-0.682545	-1.01773	0.226232	-0.833428	-1.91634
ybl117	0	0	-0.0743644	-0.177767	-0.207301	0.0235788	0.0641146	-0.0393028	0	0.293575	0.0359748	0.899592	0.216714
ybl183	-0.403149	0.301335	0	0.47756	0.321427	0.625582	0.514727	0.254542	0.340825	0.899568	0.675419	0.820057	0.0278458
yfiH	-0.437987	0	0.133855	0.163697	0	0.282849	0.313208	-0.137847	0	0.898681	0.577659	0.526073	0.238215
sirA	0	0.399511	0.0524773	0.0876312	0.494732	0.166229	0.418854	0.341324	0.172781	0.89846	0.61286	0.0786632	0
garP	0.208537	0.897837	0	0.359034	0.07623	0.0816419	0.402146	0.309066	0.00189126	0.615367	0.0521428	0.383811	0.236061
lysP	-0.317154	-0.0770179	0	-0.122299	-0.198936	-0.355277	-0.31153	0.00405352	0.210326	0.897583	0.633506	-0.0997181	0
ybiV	-0.0533004	0.725913	0.265701	-0.0163735	0.361588	-0.139587	0.243991	0.324147	0.795159	0.897219	0.472235	0.651913	0.328508
yaaY	0	0.247204	-0.11692	0	-0.350497	-0.115196	-0.0219615	0.000963366	0.89655	0	-0.48646	-0.725642	-0.555572
ybbO	0	0.639369	0	0.635391	0	0.528341	0.498377	0.262088	0	0.671487	0.89652	0.122068	0
ydeJ	0.231947	0.520936	0.0647784	0.709095	0	0.231308	0	0.0631738	0.403241	0.483476	0.866329	0.200592	0.895922
bioB	-0.409737	0.0377242	0.126108	0.147261	0	0.0765137	0.177489	0	0.0201132	0.895742	0.462531	0	0.661013
yhbJ	0	0	0.311022	0	0.311685	0	-0.321748	0	0	0	0.0545402	0.895664	0.298048
yggW	0	0	-0.140929	0.37971	-0.0937444	0	-0.061204	-0.152357	0.895325	-0.0234443	0	0	0.0499345
yeaE	0	0.450556	-0.03814	-0.0931717	0	0.120283	0	-0.0206562	0.0240146	0.894186	0.590402	0.132619	0.466225
ybl37	-0.256318	0	-0.114517	-0.151801	-0.323514	0	-0.562486	-0.202955	0.892623	-0.719588	-0.326185	-0.333789	-0.138826
ybl135	0.0758596	0.0466075	0.107024	0.118894	-0.122026	0.000447423	0.626562	0.0376227	0.082962	0.892218	0.7303	0.123956	0.00618453
ygbK	0	0	0.273952	0	0.0921379	0.142774	0.280801	0.892106	0.229923	0.688665	0.558125	0.299541	0.526189
rplD	0	-0.199185	0	0.891461	0.383123	0.40622	0.653845	0.263031	0	0.600289	-0.0620601	0	0
livM	0.116884	0	0.0447362	0.0705222	0.299713	0.0130848	0.619728	0.181457	0.152476	0.792563	0.8886	0.631616	0.267637
appB	0.132275	0.00425458	0	0	0.065514	0.0961451	0.401649	0.126706	0	0.887409	0.24208	0.257712	0.205432
ydeI	0	0	0.118769	0.886668	0.293046	0.0150339	0.043625	0	0.105629	0	0	-0.131101	0
entD	-0.854513	0	0.0653621	0.399603	0	0.113982	-1.14584	0.219265	0.134491	0.885619	0.698759	0.513354	-1.06203
rlmE	0	0	-0.582735	0	-0.45356	0.541848	0.884397	0.0160103	0	-0.157151	0.0631724	-0.0191479	0
yfaE	0.216748	0.248384	0.385702	0.300684	0.322331	0.159964	0.515803	0.515872	0.495701	0.701641	0.884075	0	0.134084
ydhF	0.884021	0.776421	-0.0520861	0.136988	0	0	0	-0.248721	0	0	-0.0671113	0	0.494244
lplT	-0.450082	-0.104232	0.263175	-0.171858	-0.462643	0	-0.329873	-0.296353	-0.762633	0.883813	0.11758	-0.184349	0.0599732
galP	-0.795791	0.442367	-0.615661	0.300515	-0.967614	0.40784	0.883813	0	0.193871	-0.512647	-0.521935	-0.339675	0.537561
ybhK	0.273122	-0.0008945	-0.0908479	0.136246	0	0.22879	0.127018	-0.194053	0	0.88177	0.0139639	0.129046	0.0395972
mreB	-0.23015	0.700492	-0.462239	0.341302	-0.792405	0.736966	0.880822	0.877444	-0.216292	-0.0365995	0.863109	-1.3523	0.0647846
torY	0.691016	0	0.208228	0.185394	0.187908	0	0.163673	0.336331	0.0858435	0.340014	0.323353	0.88045	0.0581885
pspC	0	0.072244	0	0.349985	-0.0168205	0	0.250605	0.88039	0.263434	0.183401	0.420044	0	0.141649
dcp	-0.475352	0	0.00164706	0	-0.353842	0.60989	0.880275	0.405586	0	0.0871547	0	0.238858	0.270901
glcE	-0.361681	-0.0106914	-0.0745604	-0.222567	0.0939002	0.125954	0.20132	-0.0189003	-0.00727481	0.879966	0.353978	0.215638	0.0421244
yeaV	-0.252564	0	0.111691	0.302801	0.00888322	0.191246	0.312656	0	0.343549	0.87928	0.374302	0.0944297	0.539271
dapA	0.00321311	0	0.310536	0.0588755	0	0.336562	0.19385	0	0.010685	0.589664	0.783357	0.879205	0
slyD	-0.0129795	0	-0.524031	0	-1.65862	0	0.879101	0.438777	-0.977824	0	-1.11583	-0.654839	0.285003
proS	-0.429842	0	0.285204	0.33984	-0.127783	0.459927	0.768249	0.336791	0.12515	0.0882514	0.20667	-0.0215985	0.878862
kpsS	0.455819	0.878381	-0.016387	0.0175623	0.121472	0.0537068	-0.203063	0.33074	-0.526675	-0.367736	0.28076	0.793449	0.130248
accD	-0.186272	0.50375	-0.2043	0.324815	-0.173161	0.392672	0.438717	0.083076	0.0603082	0.738246	0.00460991	0	0.876396
serB	-0.173045	0.467056	0	0.175893	0	-0.094268	-0.105605	0.0478908	0	0.875687	0.77915	0.0868042	0
ycaL	0.0467955	0.480888	0.0364601	0.582239	0.184461	0.142302	0.87557	0.125897	0.535676	0.540696	0	0.504821	0
dapE	0.189171	0.249768	0	0	0.218259	0.602071	0.8753	0.30968	0.0266232	0.219454	0.453549	0.632096	0
mcrB	0	-0.409372	0	-0.160437	0	0	-0.0475655	-0.0450777	-0.0593295	0	0.0280646	0	0.874066
essD	0	0	-0.166136	-0.0661378	0	-5.77399e-05	0	0.18309	0.873557	0	0	0.664214	0
rnb	-0.602329	0.143804	-0.144854	-1.08417	0.292107	-0.603544	-1.12961	-1.34051	0.87311	-0.654717	-1.09681	-0.339174	-1.62372
gspC	0	0	0	0.240592	0.186644	0	0	-0.00823803	0.358048	0.873039	0.732904	0.466082	0.243156
yhbW	-0.0901334	0.303234	0.0611627	0.317017	0.243621	0.396936	0.670022	0.735029	0.338724	0.717782	0.651611	0.872691	0.122684
marB	-0.316905	0	0	-0.0606484	0	0	0	0.058259	0.295497	0.872183	0.0921846	0.144446	0.305952
srlB	0	0.165852	-0.0938432	0.271659	0	0.426184	0.184333	0.325316	0.804055	0.870455	-0.0770916	-0.550648	0.26015
yoaD	0.0857665	-0.178661	-0.0268064	0.000607345	-0.144397	0	0.0484067	0.0579544	0.355653	0.868795	0.0674905	0.0469543	-0.0647765
gcvP	0.26239	-0.162418	-0.0167544	0.177179	-0.125177	0.124791	0.868412	0	0.203543	0	-0.0422741	0.602574	0
yfbV	0	0	-0.186141	-0.176766	-0.0258218	0.00998642	0.695024	0	0	0.868212	0.0352395	0.43317	0.0619857
gatA	0.00729102	0	-0.270636	0.066054	0.121988	0	0.773743	0.55571	0.060397	0	0.866777	0.102545	0
aspU	-0.934095	-1.09433	0.403905	0.420733	0	-0.164229	-0.337996	0.866144	0.594337	0	-0.937459	-0.486157	-0.154034
cspC	0.312598	0.0357036	0.258581	0.118628	0	0.611502	0.86558	0.395814	-1.87317	-0.69001	0.191721	-1.46902	0
infC	-0.281835	0	0	-0.026115	0	-0.153765	-0.114116	0	0	0	0.865414	0.424901	-0.353977
minD	-0.780105	-0.0606107	0.0379561	0.379509	0.209006	0.152345	0.865374	-0.0279792	-0.203684	0	0.437151	0.499933	0.480164
gadW	-0.356872	0	-0.497275	0.865104	-0.679279	0.255911	0.597985	-0.16413	-0.017079	-0.135625	-0.0421006	-0.365323	-0.0342413
uidA	-0.630938	0.34809	0	0.137572	0.00280461	0.293467	0.500701	0.476729	0	0.864538	0.0682906	-0.490432	0.727575
ybl99	0.11062	0	0.223804	0.109935	0.407502	0.864431	0.0836265	0	0	0.169785	0.272409	0.340405	0.0986108
ligB	-0.0145953	0.664676	0.160507	0.319396	-0.0315153	0.371334	-0.225513	0.0762814	0.429268	0.864394	0.775839	0.309403	0
codB	-0.0749432	0.0423563	0.109369	0.314403	-0.106758	0.323062	0.222873	0	0.108231	0.86366	0.133721	0.671394	-0.324358
ybfM	-0.171834	0	0.329863	0.139475	0	-0.0157578	0.206173	-0.035258	-0.714012	0.863182	0.290902	0	0.0815797
sspB	-0.118506	0	0	0	0.0260905	0.102219	-0.050613	-0.0110987	0.862862	0	0	0	0.0354961
rpsS	0.862713	0.305542	0	0	0	-0.201237	0	0	-0.995382	0.149072	0.559054	-0.668153	0
malZ	-0.945249	-0.225231	0.159405	-0.600122	0.0467137	-0.313514	-0.894587	-0.573454	-0.399191	0.862086	0.0298146	-0.585788	-0.559647
yjeT	0.0577728	0	-0.170972	0.0751439	0	0.247098	0	0	0	0.862036	0.148464	0.0718542	0.861501
hycF	0	0	0.0258381	-0.0767212	0.38785	0	0.310682	0.462923	0.207413	0.860378	0.46036	0.546505	-0.0977886
yieL	-0.722594	-0.560879	0.136963	0.0668521	0.0708977	0.137862	0.261461	0.110347	0.0876721	0.860175	0.497638	0.387411	0.372966
agaD	-0.134296	0	0	0.131998	0	0	0.0817354	0.259114	0.233899	0.860119	0.554474	0	0.0725888
ybl152	0.152706	-0.269067	0.118129	0	0.429289	0.0202053	-0.183432	0	-0.387453	0	0.210886	0.85506	0.859836
yciK	-0.112502	-0.199545	-0.200903	0	0.174941	-0.218282	0.0544233	0	0.85976	0.0992995	0.131561	0.00210162	0
thiH	-0.37711	0	0	0	-0.0271452	0	0	0	-0.369961	0.858939	0	0	0
yahF	-0.113746	0	0.244724	-0.0939148	-0.708943	0.250913	0.857004	0.152114	0	-0.626229	0	0.133261	-0.572639
yraI	-0.0222048	0.193529	0.00699123	-0.132084	0	-0.0180661	0	0.257996	0.380195	0.631226	0.643756	0.856813	0
fimD	-0.395016	-0.531345	0.0451434	0.194667	-0.268407	0.285318	0.321079	0.856623	-1.79375	0.0357795	-0.644085	0	0.113137
zraR	0.450586	0.643612	-0.205615	0.439675	-0.326721	0.608881	0.856241	0.0843631	-0.100558	0.440461	0.744659	-0.213755	0.17264
fklB	-0.620744	0.184991	0.388195	0	-0.391077	0.093112	0.855983	-0.0438777	-0.939358	-1.16744	0.0189714	0.26279	-0.108737
ybdN_2	0	0	0	-0.0273369	-0.29391	0	0	-0.368771	0	0.855527	0	0.034725	-0.224282
sbcC	-2.49763	-0.927565	0.248	-0.561639	0.450457	-0.537332	-0.223958	-0.40496	-1.34169	0.854743	-0.648089	0	0.691369
yneE	0	0	-0.0395689	0.569177	0	0.128079	0.423611	0.037774	0.853379	0	0.118423	0	0.399689
yacL	0.853279	0.125594	0	0.0999006	-0.152547	-0.029358	0.240859	0.304508	0	-0.416417	0.558176	-0.541314	-0.0558222
rstA	0.0867531	0	-0.156574	0	0	0	0.852505	0.103199	0	0.82991	0.153615	-0.0967967	0.171451
ygcS	-0.737445	-0.49772	0.000734044	0.313902	-0.0237897	0.188656	0.0537736	0.497771	0	0.852311	0.545632	0.0792792	0.266491
mhpA	0.411039	0	0.114185	0.220616	0.182532	0.524233	0.241322	0.851997	0.392778	0.506493	0.846944	0.53058	0.0302945
gspD	0.333935	0.235247	0.236173	0	0	0.851873	0	0.0838968	0.563744	0.453846	0.494633	0	0.153912
yjbG	0.0206057	0.371655	0.195778	0	0.300023	0.340532	0	0.187226	0.576945	0.851787	0.824502	0.720613	0.0279804
ydgA	-0.49237	-0.193069	0.202298	0.169905	-0.75839	0.164786	0.00706648	0.511187	0.848605	0.818264	0.720153	-0.570091	0.38608
ydjL	0.19553	0.136394	0.292526	0.367562	0.0597589	0.4432	0.136275	-0.0698817	0.139604	0.712951	0.847709	0.124614	0.431853
upp	-0.268325	0.0165157	0	0.220107	0.150447	0.244761	0.22331	0	-0.171228	0.84766	0.223738	0.199589	0.329315
yhfG	0	0	0.421286	0.188906	0	0.326558	0.317526	0.84694	0	0.102199	0	0.0450013	0.631692
degQ	0.138437	0.456692	0.377792	0.224848	0.0246858	0.301189	0	0.094065	0	0	0	0.84622	0
ypfH	-0.533994	-0.0813886	-0.0655311	-0.180405	0.0843827	0	0	0	0.846061	0	0.162336	-0.00620352	-0.463872
cydA	-1.20267	-1.14051	-0.458678	0.0272791	-0.244068	-0.0430725	0.4135	0.579818	0.488313	0.683362	0.29045	0.845916	0.207842
rfaD	-0.514361	-0.371494	-0.011311	-0.233186	-0.367352	-0.178639	0.266038	-0.341079	0	0.845392	-0.601794	-0.409626	0
nuoM	-0.317532	0.149366	-0.248908	0.250667	-0.8856	0.348826	0.548237	-0.0143401	-0.0329367	0.844897	0.469987	-0.59545	0.800501
caiB	0	-0.686235	0.0904561	0.00332355	-0.261516	-0.556143	0.0241776	0	0.844349	0	-0.441673	0.0759633	-0.619931
dmsC	0	0	-0.229444	0	-0.112716	0	-0.225874	-0.4484	0.843803	0	0	-0.114842	-0.14004
clpX	-0.475433	-0.503496	0	0.103393	-0.299409	0.516049	0.842913	0.404363	-0.95724	-0.575979	-0.235909	-0.581691	0.426876
yajQ	0	0	-0.174457	0.141801	-0.027469	0	0	0.0638501	0	0.842204	0.551626	0.110393	0.355903
yddV	0.128418	0.308001	0.0747091	0.145429	-0.142469	0.142572	0.163562	0.360686	-0.242254	0.663418	0.269912	-0.224897	0.841993
eutD	0.149003	0.486525	0.208803	0	0.383053	0.483902	0	-0.305066	0.337474	0.841895	0.40006	0.353797	-0.513867
ydaM	0	0	0	0	0	0	-0.236875	0	0.798702	0.841829	0	0	0.28663
ybl25	0.294416	0	0	0.0234955	-0.237923	0	0	-0.0237098	-0.620532	0.841151	0.173804	-0.281336	0
ybl130	-0.477606	0	0.0799661	-0.344875	0.541316	0.152136	-0.000616821	-0.0195981	-0.511139	0.840228	0.346425	0.678735	0.36935
yhjC	-0.42421	-0.231325	-0.296909	-0.388049	-0.0719315	-0.429122	-0.351889	-0.1301	0.839982	0.190656	0	-0.173182	-0.69491
ydiU	0	0.0920906	0.089366	0.641918	0.123128	0.839291	0.346027	0	-0.22559	0	-0.292703	0.236736	-0.190561
fadR	-0.62668	-1.17431	-0.216072	-0.231934	0.0814018	-0.379167	0.134895	0.839036	-0.460671	0.162801	-0.778949	0.661938	-0.456119
yddL	0.201131	0.836725	0.221888	0.0428939	0.398917	0	0.367975	0.11578	0.365103	0.685505	0.224181	0.418169	0.503028
sulA	-2.08117	-0.488818	-0.257923	0.195963	0.403713	0.291626	0.735482	0	-0.654112	-0.805904	-1.57459	3.66225e-05	0.836438
pps	0.13652	-1.93253	-0.0853139	-0.196133	-0.0121305	-0.0839409	0.0754336	0.00410463	-0.656675	0.836114	-0.50689	-0.418238	0.144151
kgtP	0.000886053	-0.0521879	-0.155462	-0.231755	-0.348365	0.14839	0.836085	0.527243	0.186981	0	0	-0.247915	-0.194421
lptA	0.246254	-0.106331	-0.037911	0	0.116946	0	0.287917	0.4664	0.835633	-0.0764773	0	0	-0.316402
valX	0.835567	0.193309	0	0	-0.0221693	0	-0.30161	-1.27388	0.0600449	0	0	0	0
trpL	-0.0730721	0	0	0.13944	0	0.164135	0	0	0.203956	0.835395	0.10009	0	0
nanC	0	-0.242601	-0.0872098	0	0.0173067	0.040744	-0.212824	-0.366485	-0.342228	-0.496898	0.273715	0.834772	0.287153
flgA	0.270072	0	0.198082	0	0.311916	0.33041	0	0	0	0.528628	0.240687	0.833701	0.246626
sucB	-0.11479	-0.00821859	0.249623	-0.459699	0.0996753	0.200725	0.550413	0.141986	0.501222	0.833546	0.217766	0.197949	0.0852452
ycbQ	0.676703	0.638191	0	0	0.563412	0.418486	0.311006	0.753319	0	0.146702	0.12487	0.833309	0.817741
yhaK	0	0.248416	0	0	0.224992	0	0	0.185417	0	0.832913	0.0335526	0	-0.142769
ybl58	0.173743	0	0	0	0	0.00990028	0	0	0	0.832658	0	0	0.043966
yecA	0.811452	0.329887	-0.0414064	0.21479	0	0	0.254488	0.208146	-0.790803	0.0134025	0.533432	0.569696	0.832587
yibV	0	-0.0697852	0	0.189524	0.832152	-0.0586013	0.267773	-0.0620068	0.474176	-0.00159603	-0.00134657	0.680942	-0.0200379
ydcI	-1.6528	-0.137194	-0.238271	-0.135154	-0.0577039	0.0989587	0.832102	-0.0357375	-1.15553	0	0.387881	-0.523502	0.526723
rutB	0	0	0.0141768	0	0.124307	0	0.161662	0.0236219	0.698186	0.831699	0.270803	0.181248	0.0238407
yjiG	0	0.254129	0	0.831464	0	0.161408	0.246584	0	0	0	0.153555	0	0
infA	-0.168061	0.431554	0	0	-0.266781	0.830749	0.0679398	0.312857	0.575386	0	0.053624	0	0.430464
murR	0.122305	0.508982	0.0208771	0.0177418	0	0.257859	0.129109	0.30262	0.345763	0.830334	0.827789	0.279735	0.161369
ybl31	0	-0.202008	0	0.270766	0.0431351	0.122157	0.19805	0.169475	0	0.830252	0	0.0876565	-0.116744
dnaG	-0.719949	-0.470258	-0.126453	-1.44843	-0.928188	-0.55277	-0.242248	-0.314799	0.829572	-0.611717	-0.430414	-2.00641	-0.66831
clpS	-0.172145	0	0.135639	0.049868	0.0385447	0.345843	0.106859	0.828742	0.0313191	0.226418	0.368689	-0.0171795	0.0876402
sfmA	0.0628972	0.386862	0	0	0.22252	0.37795	0.363796	0	0	0.434811	0.303412	0.827894	0
ybaO	0.00123358	0.243831	0.0824337	0	0.0924518	0.332402	0.11753	0.187682	0.566674	0.796109	0.827641	0.178941	0.223983
rbsD_1	-0.406427	0	0	0.0652388	0	0	0	0.0537844	0.827623	0.331123	0	0	0
mnmC	-1.00381	-1.36861	0.165414	-0.293557	-0.216085	0.578829	0.245963	0.242584	0.0314775	0.82713	-0.600626	-1.08348	-0.0275934
yohO	0.0230262	0	0.0618213	0.629878	0.335534	0.243532	0.0518165	0.400178	0.673981	0.825579	0.0726971	0.43654	0
ybbC	0.439652	-0.391971	0.00331857	-0.0731839	0.599886	0.431409	0.2488	0	-0.345605	-0.578854	0	0.82495	0.119024
rsuA	0	-0.0831495	-0.177864	0.0293246	0	-0.133519	-0.116981	-0.158856	0.824215	-0.108087	0	0.135652	0.018372
kdgT	-0.0134516	0	-0.0155374	0.105706	-0.1715	-0.0371968	0	0	0.163651	0.823565	0.522499	0.293795	-0.01948
ampE	-0.0770285	0.0825793	0.823035	0.111259	0.337872	0.583187	0.621102	0.494073	0.423413	0	0.11959	0	0.354528
allD	0.332497	-0.00210954	-0.0115473	0.415263	-0.0675323	0	-0.170826	-0.258062	-0.0683625	0.822089	0.439514	0.0052831	0.108149
ybdM	-0.436787	0.821305	0	0.204175	0	0.470472	0	0	0	0.036132	0	0	0
hisS	0.418022	-0.555566	-0.0107262	0.334258	-0.681942	0.355905	0.820342	0.152942	-0.676944	0	0	0	0.445498
osmY	-0.224914	-0.0711239	0.0627707	0.361315	0.0140105	0	0.819048	0.288437	0	0.812789	0.446025	0.742723	0.405181
ylbF	0.456166	0	0	0.0967015	0.0601728	0.155354	0	0.0946382	0	0.818479	0.614561	0	0.580107
pepE	0.076953	-0.00980161	0.219369	0	-0.0422632	-0.0657058	0	-0.0927776	0.243148	0.817444	0.488856	0.0979878	0.468782
ybjX	0.417451	0.0429205	0	0.297391	0	0.169612	0.623306	-0.0135702	0.179077	0.183742	0.326051	0.480075	0.815455
ybfD	0	0	0	0	0	0	0.207004	0	0.815132	-0.0652142	0	0	0.778513
alkA	0	0.0102801	-0.243918	0.027437	-0.308983	-0.117585	-0.00309159	0.234719	0.815065	0	-0.224998	-0.060219	-0.262683
emrE	0	-0.360775	0	-0.118689	0.0623589	0	0.0273258	0	0.0528545	0	0	0.814609	0
yafT	-0.0294934	0	0	0.418802	-0.0338034	0	0	-0.130382	-0.0655142	0.813647	-0.221687	0.536765	0
typA	-1.10581	0	0	-0.00235625	-0.597125	0.173806	0	0.812715	0.0612016	0.478457	0.518437	0.234821	0.0195874
ybcK	-0.26234	-0.940607	0.29584	-0.0477949	0.300992	-0.454424	-0.220054	-0.412674	0.812536	-0.584983	0.458423	0.195002	-0.164612
atoE	-0.271573	0.0904014	-0.114153	-0.231279	0	0	0	0	-0.104934	0.81249	-0.00582163	0.523122	-0.0112154
insB-28	0	-0.224473	0.0947148	0	0.812447	-0.107427	-0.182147	0.410007	-0.216473	-0.155133	-0.0428018	0.679787	0.0900923
rimK	-0.349727	-0.0573338	-0.319556	0.34751	-0.0802463	0.14249	0.0482405	0	-0.368719	0.811598	0	0	0.0853976
hflK	-0.713979	0	0.0397184	-0.133798	-0.620789	-0.391027	-0.000212914	-0.0931944	0.811453	0	0	-0.94858	0.0290681
ychO	0.457452	-0.113178	0	0	-0.216823	-0.107392	0.0839137	-0.0614926	-0.281311	0.810763	0.148933	0	0.12435
emrA	-0.202371	0.424816	-0.0503044	0.409144	-0.2663	-0.0958393	0.253738	0.065987	0	0.633194	0.191487	0.810419	0
ygiL	0	0	-0.0697535	0.158058	-0.112786	0.107284	0	0.247584	0.810272	0	0.38053	0.272193	0.0963093
ybl193	-0.0762796	-0.275277	-0.162643	0.10765	0	0.00974207	0.0829336	0.155188	0.810045	0	0	0	0
frmR	-0.0115227	0.0211292	0.156576	0	0	-0.0017829	0	0.248231	0.809636	0	0.278671	0	0
mutS	0.116437	-0.0113041	-0.279182	0.224656	-0.451646	0.55206	0.48167	0.173594	0.639768	0.809155	0.260156	-0.0909698	-0.393797
yhiJ	0.808628	0.735372	-0.0211327	0.343196	0.601515	0.298012	0.145782	-0.170449	0.261301	-0.339305	0.496717	0.395409	-0.0588887
yejM	-0.0642716	0	0	0.467028	0.213536	0.098531	0.613835	0.808182	0.182339	0	-0.110167	0.323237	0.0790731
yqhA	-0.506814	-0.257721	-0.0130842	0	-0.0691848	0	0	-0.360207	0.808052	0	0.353051	-0.0748749	-0.149511
dedA	-0.26545	-0.120913	-0.140205	0	-0.236042	0.255498	0.0275366	0.240783	-0.501547	0.807497	0.0297155	-0.058613	0.0544464
ycaO	-0.777194	-0.46516	0.386475	0	0	-0.0305729	0.134848	0	-0.256938	0	0.806966	-0.137031	0.64208
malX	0	-0.119142	-0.768692	0.346614	-0.955377	0.58423	0.276904	0.219942	0.0696619	0	-0.236229	-1.0733	0.806557
ispA	-0.307702	0.13988	0	0.662093	0	0	0	0	0.147549	0.806501	0	-0.503236	0
yagW	-0.476391	0.0886531	0.129385	0.0708635	-0.148182	0.180216	-0.0159204	-0.432861	0.806111	0.489474	0.0648358	-0.0251091	-0.168919
pabB	-0.0685227	0	0	0.287057	0.0121212	0.346937	0	0	0.407974	0.805874	0.549875	0	0.209905
mtlD	-0.397277	0.0432883	0.307557	-0.0548625	0.142482	0.413844	0.753103	0.0619173	0.5105	0.804541	0.553142	0.251769	0.309039
yegI	0	0	-0.231905	0.0564109	-0.321105	0.0744458	0.166595	0.156935	0.80395	0.045379	0	-0.17323	-0.0546945
tbpA	-0.0227932	0	0.00487012	0.256811	0	0.179169	0.229348	0.191374	0.491128	0.803215	0.388493	0	0.183823
speA	-1.07659	0	-0.265707	0	-0.243957	0.0173941	0.802452	-0.0840996	0	-0.43133	-0.106457	-0.357236	0
ybl87	0.741093	0.616712	0.0747852	0.327063	-0.176401	0.0403359	-0.245006	-0.116183	0.800473	0.418592	0.0965811	0.167637	-0.11748
ybl162	-0.557728	-0.378344	-0.167128	-0.0784482	-0.23696	0.239904	0.108382	-0.423134	0.799482	-0.255021	0.559235	-1.32689	0.425214
feaB	0.301866	0.12592	-0.151339	0.06178	0.106269	0.473478	0.295401	0.5039	0.797847	0.487694	0.429087	0.159267	-0.0413555
phoE	0.617492	0	0.0169527	0.44592	0.248398	-0.00103369	0.114606	0.147109	0	0.587274	0	0.797777	0.0267265
aceA	-0.554664	-0.486095	-0.0942195	0.0898425	-0.373946	0.166333	0.307487	-0.201084	0.320929	0.796207	-0.081854	0.162624	0.0160715
yaiL	0.283858	-0.0635631	0	-0.150786	0	0.136469	-0.0150808	0.390432	0.794724	0.469528	0	0	-0.119319
dapB	0	0.181526	-0.0421186	0.121793	0.1809	0.205487	0.205065	0.313325	0	0.793538	0.0453408	0.395794	0.0332558
rstB	-0.937595	0.793392	-0.0244928	0.327516	0.0160701	0.38286	0.624589	-0.00810654	-0.481937	0	0.146515	-0.316779	0.206907
recO	0	0	0	0	-0.139181	0.0926183	0.793059	-0.133713	0	0	0	-0.091009	0.023577
rbsD_2	0.120438	0.207758	0.310251	-0.182998	-0.139423	0	0	-0.137537	0.792724	0	0.636144	0	0.396726
insAB-13	0	0	0.102732	0	0.342682	0.0655211	0	-0.136279	0.683904	0.347202	0.172808	0.620226	0.792707
recR	-0.903569	0.575717	0.0165033	0.257844	-0.336965	0	0.125311	0.503785	-0.292596	0.791529	0	0	0.0131323
grxB	-0.45362	-0.351047	0.135119	0	-0.116241	0.024865	0.101272	0	0.543622	0.791516	0.223919	0.0991303	0.101883
dxr	0.0576975	-0.250551	0	0.400098	0.0955976	0.791062	0.100312	0.147369	-0.15798	0.486116	0.242188	0.275895	-0.0139877
ybl32	-1.33668	0	-0.401418	0	-0.00668167	0	0.0851269	0.259199	0	0.790956	0.699644	0.286488	0
yfaX	-0.116125	0.397623	0.108506	0	0	0.471214	0	0	0.165175	0.790839	0.506842	0.359217	0.422282
dmsA	-0.506645	0.611667	-0.0421035	0	-0.0293826	-0.176323	0.467533	0	-2.24399	-0.177761	-0.336208	-0.849176	0.789
proB	0	-0.362467	0.0181358	-0.0600034	0.161686	-0.0733443	-0.0337182	-0.0771353	-0.49937	0.711035	0.52611	0.788846	0.156764
ybaL	-1.19604	-0.485551	0.0279776	0.196948	-0.73616	0.787677	0.381233	0.206593	0.126842	0	0.596027	0.580791	0.139687
ruvB	-0.459623	-0.859936	0	-0.53833	-0.570073	0	0	0.0969726	0	0.787452	-0.506477	-0.430506	0
ilvA	-0.218233	-0.0133414	-0.0197121	0.786538	-0.222488	0.310547	-0.292218	-0.126875	0.777619	-0.407213	-0.292022	-0.259345	-0.348889
puuB	-0.282786	-0.223357	-0.18307	-0.0624764	0	0	0.786273	0.171932	0.0139313	0.65885	0	-0.239098	0.139822
yhaM	-0.971294	0	-0.20938	0.208809	-0.100942	0.0546026	0.409874	0.0968147	0	0.785596	0.483605	0.284403	0
tehA	0	0	0	0.102905	0	0	0.10006	0.147412	0.545743	0.785573	0.0593461	0.111752	0
ftsI	0.225872	0.785389	0.212674	0.674706	-0.744102	-0.174633	0.488487	0	-0.217824	0	-0.18257	0.0607732	0.216158
speC	0.785377	-0.41783	0.0820725	0.101623	-0.574565	0.393527	0.391143	0.0952834	-0.91797	-0.299556	0.276054	-1.19574	0.221346
mqo	-0.891139	-0.590131	-0.830962	0.78295	-1.5643	0.34528	0.548692	0.429117	-0.248288	-0.971766	-1.40354	-1.12116	0.506433
yqgD	0	0	-0.0643889	0	0	0	0.0867235	0	0.292436	0.782543	0	0	0.0595285
oppA	-0.453701	-1.00032	-0.171265	0.099327	-0.132462	0.46506	0.44225	0.78095	-0.0815723	-0.0160234	0	-0.160584	0.0984796
nsrR	-0.356505	0.00695258	-0.0319576	0.460647	0.237446	0.173274	0.307027	0.323737	0.464068	0.780503	0.287015	0.470071	0.322655
yjbF	0.258109	0	0.112764	0.556664	0.0574734	0.159316	0.780314	0	0	0.54049	0	0.0774062	0.184425
sdhA	-0.494414	-0.553055	-0.0526181	-0.517861	0	-0.115796	-0.0559306	0.101341	0.779417	-0.290951	0	0	-0.613552
yhhQ	-0.160726	0	0.150812	0.0433751	0.132183	0.106105	0.203554	0.716649	0.281241	0.779351	0.590263	0.646752	0.325214
ftsA	0	-0.579318	-0.204732	0.778036	-0.364333	0.146003	0.156592	-0.00844444	0.244095	0.261367	-0.776353	-0.721124	-0.659446
valS	-1.98199	-1.50479	-0.241025	-0.703018	-0.59976	0.777608	-0.163499	0.625604	-1.55309	0.241008	0.237039	-0.574694	-0.979536
yhhT	0.0731938	-0.0187818	0	0.0905909	0.0210692	0	0.0379069	0	-0.296324	0.777082	0.598432	0.0116086	-0.326528
hycD	-0.0844481	0.311381	0.00760682	0.248259	0	0.15814	0.571533	0.0176451	0	0.77551	0.270738	0.180948	-0.0805146
abgR	-0.426613	0	-0.225371	0	0	0.104255	0.271188	0.0978586	0.775281	0	0	-0.00366179	0.194229
ypdK	0.305476	0	0.266887	0	0	0	0	0	0.00425528	0	0	0.773407	0
cysQ	-0.185867	0	0.14851	0.10654	0.258439	0.203918	0.419431	0.42553	0.0618105	0.772559	0	0.411557	0
mipA	-0.0268568	0	-0.29214	0.19441	-0.171867	0.259801	0.770947	-0.136381	0.711354	0	0	0	0.325714
ybbD	0	0	0.0247943	0.538915	0.77081	0	0	0	0.0738597	0.0493519	0.316096	0.526638	0.48338
aroE	-0.468418	-0.422115	0	0	0.14622	0.0807455	0	-0.080865	0	0.318961	0	0.357649	0.770749
ydeH	-0.408393	-0.450179	-0.0965077	0	-0.134741	-0.413706	0.429238	0	0.770558	-1.26327	-0.630733	-0.579392	0
flgB	0	-0.0570803	0.0935717	0	0.42298	0.0913562	0.770496	0	0.425834	0	0.578706	0.0783706	0
glnD	-0.874837	-0.182213	0	0.541294	-0.00677423	0.275762	-0.418889	0.281635	-0.531809	0.566448	0.769539	-0.73589	0.247366
mtr	-0.382505	0.154505	-0.27343	-0.33467	-0.126703	0.369882	0.409511	-0.136537	-0.307944	0.0275225	-0.380388	0.117016	0.769479
rssA	0.243141	0.528564	0.0426073	0.042713	-0.283993	0.121341	0.768915	0	0.600667	0.297028	0	0	0.711323
frsA	0.279957	0.515227	0.080768	0.190818	0	0	0.477974	-0.236981	-0.112613	0	0.00684298	0.767899	0
ybgK	0.56741	-0.164861	0.181731	0.0810601	0	0	0.767466	0	0	0.206073	0	-0.596468	0.337313
yiaT	-0.405592	0	0.0156314	-0.124355	0.197573	0	-0.334506	0	0.766483	0	0.5807	0.382632	0.384095
insAB-1	-0.298777	0	0.138592	0	0.766102	0	0.129482	0	-0.225726	-0.0665472	0	0.714886	0
ybl88	-0.0342023	0	0.213716	0.52841	0	-0.417691	-0.0701742	0.765154	0.220478	-0.691559	0.577034	0.527128	0
yhgF	-0.983146	-1.14509	-0.228698	-0.669882	-0.045781	0.468164	0.31045	0.683713	-0.708501	0.76497	0	-0.478057	0.714565
artM	0	-0.0461254	0.0389378	0.0240072	0	0	0	0	0	0.76384	0.0112127	0.22394	0
ybl142	0.0780398	0.352474	0.201063	-0.0972188	0.109045	0.550962	0	-0.00249757	0.282867	0.763741	0.503872	0.599577	-0.276991
uspE	-0.769815	0	0.339938	0.257491	0	0.0811636	0.763393	0.602536	-0.0951259	0.20226	0.194059	0.569559	0.432564
menB	0	0.0404565	0.0395194	0.162415	0.167807	0	0.667446	0.254183	0.763036	0.372895	0	0.35251	0.359511
alaW	0	0.0823858	-0.299687	0	0	0.762922	0.579985	0	0	0	0	0.672181	0
rimN	0	-0.340635	0	0	0	0	0	0	0.177949	0.762916	0.274401	0.122663	0
tauC	-0.352278	0.37821	-0.0631784	0.27277	0.192647	0.597567	0.184832	0.221217	0.126965	0.762506	0.163655	0.5196	0.403092
rimI	-0.34964	-0.675974	-0.0338144	-0.0937962	-0.103525	-0.447872	0	0	0.762232	-0.278825	0	-0.993326	0
prfB	-0.33974	0	-0.00675973	0	0	0.284872	0.385381	0.760181	-0.0569094	0.662814	0	0.126717	0.515712
eptA	-0.193537	-0.167636	0.0631146	0	0	-0.176188	0.759932	0.347584	0	0.742468	0	0.0078958	0.154169
frvB	0	0.431452	-0.195456	0.215642	0.170122	0	-0.0688047	0	0	0.759778	0.23223	0.565472	-0.00249846
ycbX	-0.110007	0.505417	-0.14741	0.34883	-0.152753	0.332578	0.738944	0.219705	-0.387622	0.759769	0.0883395	0.199984	0.41245
wzc	-1.44192	-0.554165	-0.246322	-0.381575	-0.296776	-0.0790551	-0.257326	-0.0289099	0.758397	0.570141	0	-0.155659	-0.561225
insJK-3	0.0173997	0.758063	-0.0405067	0	0	0	0.103653	0.138276	-0.528147	0	-0.118285	-0.712115	0
yhhM	0	0	0	0	0	0	0.043864	0	0.46123	0.758062	0.516255	0.136545	0.194715
ybl18	0	0	0	0	0	0	0	0	0	-0.024886	0	0	0.757755
fhuF	0	0	0	0	0	0	0.396908	0	0.757548	0	0.159405	-0.289384	0
aceF	-0.588843	-0.688022	-0.371188	0.0831345	-0.700969	-0.0260901	0.263429	-0.270073	0.756997	-0.579899	-0.62344	-0.511571	0.378045
ydhL	0	-0.0610381	-0.564304	0	-0.147413	0	0.550862	0.755003	0	0.0444047	0	-0.0300418	-0.265175
gltS	-0.459388	-0.450158	-0.0153675	-0.011188	-0.172594	0.36133	0.754694	0.675424	0	0	-0.199082	0.140415	0.34972
ssuD	-0.03321	0	-0.0169482	0.280519	-0.137061	0	0.170082	0.19168	0.160413	0.274655	0.754112	0	0
elbB	-0.395624	0.120905	0.264688	0	0.0308512	0	0.15105	0.0687472	0	0.391636	0.753762	0.417423	0.335435
yeiH	0	0.477734	0	0.00859178	0.0547198	-0.0353531	0.00420843	0.0166121	0.706534	0.752998	0.376652	0.0662741	0
dsbC	-0.371182	0	0.0631281	0.175519	0	0.246682	0.7525	0.279074	0	0.188399	0.310755	0.0307738	0.115552
ybbL	0.106453	0	0.145483	0	0.472933	0	0.127368	0	0.668681	0.672162	0.752149	0.312411	0.303441
yfeZ	0	0	0.00108689	0	0	0	0	-0.271352	0.751647	0	0	0	0
nanR	-0.0367802	-0.22726	-0.103684	0.00275783	-0.124325	-0.00681541	0.751634	-0.0634631	-0.227964	-0.588877	0.0848953	-0.402254	0.063105
aspA	-0.380376	-0.791962	-0.0306382	0.0565689	-0.452308	0.751392	0.262612	-0.0333747	0	-0.357149	0	-1.58919	0.0968284
yebQ	-0.422025	0.0440546	-0.17576	0.0411803	0	0.127097	0	-0.229985	0	0.349921	-0.252302	0	0.751096
elaB	-0.327391	-0.0656804	0	0.750707	-0.183036	0	-0.0240227	-0.241213	0	0.45409	0	-0.145938	0.206134
leuO	0	0.0377521	0	0	0	0.616466	0	0.0299686	-0.21813	0.486235	0.101268	-0.225113	0.750407
spr	0	-0.0536707	-0.15709	0.0847334	-0.175245	0	0.393318	-0.0198232	-0.23481	0.428336	0	0.750364	0.117453
yncI	-0.217858	-0.293798	-0.0860341	0.402578	0.0876108	-0.430606	0.0840698	0.135982	-0.076863	-0.0157774	0.0304354	0.750169	0.184374
rseP	-0.419671	0.480288	-0.394056	0.605403	-0.480389	0.37151	0.331349	-0.0269578	-0.405527	0.749336	0.380629	-0.632115	0.586227
gcvT	0	0	0.175466	0.714075	-0.135678	0.57652	0.447151	0	-0.0207712	0	0.156814	0.0639421	0.748806
yheV	-0.773665	0.121987	-0.109047	0	-0.104036	0.748801	0	0	0	0.41859	0	0.0338493	0
asnB	-0.84948	0.477108	0.0445748	0.748784	-0.715138	0.465352	0.47068	0	0.600801	-0.00471499	0.195053	-0.253368	0.383996
purB	0.104701	-0.670746	-0.100218	0.0218086	-0.330632	0.274917	0.272341	0	0	0.748441	-0.0486584	0	0.0780129
dnaJ	-0.109529	0	0.128103	-0.0356789	-0.297619	0.0112218	0.0348652	0.352159	-0.476266	0.246215	-0.201676	0	0.747599
trmJ	0.21849	0.33701	0	0.351229	0.00567022	0.127715	0	0.747336	0.252889	0	0.103988	0	0
arsR	0.389192	0.242359	0.31994	0.597962	0.2873	0.216455	0.050741	-0.0339583	0.746329	0.590238	0.577938	0.202021	0.179808
bcsZ	-0.36317	-0.17769	-0.11416	0.272648	-0.418774	0.33551	0.745918	0.094055	-0.339577	-0.034734	0.0175834	-0.887543	0.479952
rffH	-0.0792692	-0.0735281	-0.187102	0.073599	-0.295581	0.458675	0.745587	0.546943	0	0.62244	0	-0.00877337	0.031735
purA	0	-0.165329	0.0492534	0	0	0	0.119547	0.00346042	0	0	0.744516	0.465714	0
rbsK	-0.267067	-0.0669194	-0.0198286	0	-0.0327004	-0.143617	0.14868	0	0	0.215956	0.744022	0.566418	0.0622773
ndh	-1.15924	0	-0.417568	0.507317	-0.515859	0.218139	0.721638	0.404988	-0.894874	-0.267335	-0.121026	0.157048	0.743832
fumB	-0.186479	-0.259363	-0.0975921	0.225311	-0.732186	0.0428869	0.00696367	0	0	0.743729	-0.777558	0	-0.237634
fumC	-0.323676	-0.014225	-0.0343266	0	-0.386585	0.114306	-0.0778677	-0.139234	0.743524	-0.154783	-0.114365	-0.394192	0
insB-21	0.106945	0	0.0544813	0	0.743111	0.0169219	-0.103143	0	0	-0.0796808	0	0.69487	0.0484041
rrfA	0.0842749	-0.718763	-0.239298	-0.0135061	0	0.551675	0.445531	-0.786477	0.743089	-0.492687	-0.341111	-0.722878	0
umuD	-0.167564	0	0	0.187695	0.00309584	-0.0415643	-0.0320719	-0.279715	0.0771608	0	-0.056899	0.74297	-0.0894424
insAB-26	0	-0.514777	0	0	0	0	0	0	0	0	0	0	0.742593
nudB	-0.373587	-0.244172	-0.0384042	0.7425	-0.282606	0.140078	-0.316864	-0.398455	-0.0796159	-0.0631447	-0.147558	-0.409753	-0.0737983
secY	0.478716	0	0	0	0	0	0.00752716	0	0.742271	0	0	-0.269692	-0.232989
frdD	0	0	0	0	0	0.151566	0.0749083	0	0	0.742137	0	0.142498	0
ydhR	-0.398533	-0.237867	-0.0293517	-0.0621754	-0.206928	0	0.741505	0	-0.698429	0	-0.174359	0	0
oxyR	-0.350661	0.330924	0.0465563	0.337214	0.00187176	0.165671	0	0.0434755	0.39243	0.74046	0.578331	0.022415	0.0600231
yigP	-0.0224973	-0.0202027	-0.117073	0	0	-0.0748896	0	0.156624	0.0213186	0.739982	0.116572	0.185497	0
ibsB3	0	0	0	0	0.051	0	0	0.470699	0.739074	0	0	0.300262	0
iraD	-0.0588768	-0.00936001	-0.0512357	0.00456847	0	0.0876195	0.23074	-0.0539891	0.739057	0	0.111358	0	0.0822005
ydjA	0	0.0320579	-0.0705643	0	-0.265034	-0.0811624	0.738921	0.174108	-0.0582856	0	-0.222187	-0.634665	0
yneH	-0.299817	-0.0910896	-0.265145	0.27657	-0.462586	0	0.0891785	0.187479	0.039923	0.320234	0.73874	0.13551	0.327911
yecD	-0.46707	0.552226	0.0516048	0.333321	-0.124052	0.360157	0.313698	0.190187	-0.0649471	0.738643	0	0.132678	0.228031
fecB	0.0287281	0	-0.118486	-0.0748812	0.738513	0.108335	0	-0.022108	0.310948	0.318638	0.257888	0.460552	0.0734752
ybdK	-0.0426721	-0.331199	-0.0225147	0.0883796	-0.375935	0.426896	0.73841	0.354619	-0.21674	-0.517897	-0.248828	-0.684852	-0.545285
aroK	0	-0.783181	-0.095976	0.436665	0	0.245967	0.738312	0	-1.35491	0	0.114972	0	-0.238302
cytR	-0.402456	-0.338535	0.0439156	0.652765	0	0	0.566785	0.591999	0	0.737593	0.443562	0	0.635047
chaB	-0.218707	0	-0.00446056	0	0.0702812	0.0978474	0.525715	0.737159	0	0	0	0	0
frdC	-0.369723	0	0	0	0	0	0	0	0.736841	0	0.572584	0	0
yncD	-1.03268	-0.653344	-1.10408	0.0924968	-0.785737	-0.407746	0.736111	-0.280736	-0.838677	-0.53507	-0.0067181	-1.02029	0.083365
purE	-0.072533	0	0	0	0.0256121	0.316237	0.418776	0.736107	0.236844	0.641239	0.149248	0	0
ydjN	-1.06078	0.0576213	-0.64086	-0.139607	-0.588958	0.034787	0.407192	0.164281	-1.15642	0.735121	-0.275568	0	0.595207
ydjK	0.683218	0.658941	-0.034167	0.668779	0.114402	0	0	-0.154857	-0.380807	0.156405	0.504882	0.734519	0.609986
yidA	-0.353586	0.201991	0.298046	-0.0950143	0.108672	0	0	-0.0163748	0.734383	0.107823	0.0740277	0	0.277378
tyrR	-0.726936	0	-0.143391	0.124122	-0.265803	0	0.734017	0	0.594206	-0.165456	0	0	0.398348
yedY	0.238028	0.0637199	0.112349	0.433046	0.200146	0.0636278	0.100891	0.0172318	0.21693	0.73272	0.441899	0	0.185599
argD	0	0.231853	0.344939	0	0.432862	0.512051	0.267886	0.0201955	0	0.390954	0.732259	0.588958	0.182259
iscA	0	0.00581904	0	-0.0920547	0	0	0.206253	0	0.178131	0.731742	0	0	0.121594
degP	-0.176983	-0.148485	-0.217006	0.730049	-0.337456	-0.258403	0.371719	-0.0420716	-0.186371	-0.09187	-0.0738366	-0.0972203	0.00718999
parE	0	-0.593682	0	-0.0984239	-0.105799	-0.00345976	0.0610316	-0.0864262	0.729863	-0.048614	0.457848	-0.772281	0
lldP	0	-0.0897398	-0.217987	-0.641501	-0.0793814	-0.412504	-0.477192	-0.109908	0.729579	-0.0313058	-0.500753	-0.549201	-0.612029
gfcD	0.397496	0.502868	-0.279766	0.187394	-0.265848	-0.106822	0.0715911	0.729533	-1.18624	-0.614914	-0.363024	-0.528452	-0.00729638
ydfH	0.729275	-0.0759489	-0.269594	0.456618	-0.3616	-1.18587	-1.12697	-1.33787	0.605227	0	0	0	-0.135655
melA	0.516393	-0.223593	0.0954576	0.322774	0.309117	0	0.729079	-0.140961	0.0223183	0.357558	0.318849	0.497006	0.0387804
rtcR	-0.967317	-1.32561	0.0832125	-0.235982	0.200787	0.556065	0.0741221	-0.860661	-0.344584	0.657874	0.35384	0.727281	-0.721482
recJ	0	0.416162	-0.0257818	-0.0863523	-0.342806	0.164767	0.111849	0.011854	0.725836	0.0882896	-0.271033	-0.172492	0
yphA	-0.0958088	0	0	0.0792645	0.0457376	0	-0.0753735	-0.0934394	0.088482	0.725124	0.163417	0.434962	-0.0880804
yliL	0.108273	0.2485	0.074318	0.153187	0.177093	0.275316	0.0852816	0.494296	0.289511	0.723654	0.669668	0.615914	0.00381287
dgoK	0.0427223	-0.0618991	0	-0.236687	0.210399	-0.00464805	0	-0.104279	0.723098	-0.259624	-0.00615352	0	-0.363513
yeiG	-0.0245278	-0.223518	0.0577423	0.722358	-0.0869401	-0.0820855	0.500454	-0.167541	0	0.706579	0.353107	-0.0256492	0.310963
nemA	0	-0.0053415	0	0.534448	0	0.721895	0	0	-1.28912	-0.816066	-1.1046	0	0
feaR	0	-0.00114021	0	0.29576	0	0.228868	0.0111999	0.265322	0.253208	0.721291	0.311973	0	0.046465
yecE	-0.341044	0	-0.0805621	0	-0.343555	0.559959	0.181321	0.125529	-0.39938	0	-0.344136	0	0.720971
cydC	0.00145886	-0.0147731	0.0394219	0.62526	-0.0500836	0.035117	-0.0677816	0.328746	0	0.720709	0.63995	0	-0.190944
atoS	0	0	0.00801109	0.434321	-0.818318	0.504023	-0.00404129	0.720021	-0.301013	0.0488586	-1.01929	-1.19785	0
flgG	0.10854	0	0	0	0.16269	0	0	-0.00287502	0	0.719966	0	0.200175	-0.327521
ychA	0	-0.0443559	-0.14419	0.00342594	-0.638442	0	0	0	0.0775706	0.719342	-0.458791	-0.116916	-0.170836
alsK	-0.384833	0.0811855	0.00167897	0.379103	0.0623199	0.302692	0.244855	0	-0.0965165	0.60334	0.400714	0.719326	0.623747
udk	-0.351928	0	0.0525443	0.134202	-0.174785	0.208419	0.235979	0	0.13275	0.71888	0.673675	0.0463076	0.348291
bioD	-0.583521	-0.206454	-0.028212	-0.180992	0	0	-0.691391	0.104001	0.717454	0	-0.434864	-0.278274	-0.568706
ybfC	0.25774	0	-0.0111894	0	0.254119	0.0927192	-0.268558	-0.159295	-0.180095	-0.804985	0	0.716957	0.158528
agp	-0.751927	0.00104074	-0.0157378	0.0868701	0	0.165231	0.576322	0.473132	0.238894	0.416937	0.716758	-0.0523978	0.0956938
ygiZ	-0.125339	0	0	-0.0715907	0.160046	0.165852	-0.139164	-0.116621	0	0.716547	0.205402	0.706408	0
eutS	0.0461153	0	0.128902	0.339277	0.288221	0.180224	0.144034	0.414145	0.499987	0.530723	0.715752	0.501979	0.3131
ilvG	0.172065	0.0392865	0.0858696	0.265384	0	0	0.715732	0.12146	-0.476948	0	0.0472352	0.295336	0.459828
ydhP	0.183023	-0.209344	0.321254	0.198663	0	0	0.0205994	0	0.714068	0.627605	0.614637	0.671382	0.242997
rhlE	-0.323698	-0.223344	-0.0220094	0.0746269	-0.0904328	-0.0165187	0.713544	0.108909	-0.0736723	0.642199	0.314051	0.137401	-0.0349838
yrdB	-0.0744921	-0.0374123	-0.0364496	-0.409505	0	0.188971	0.250988	0	-0.440556	0	-0.098304	0.712276	0
lptB	0	-0.273146	-0.0827778	-0.139156	0	-0.111536	0	0.711729	-0.343417	-0.0446123	-0.313667	-0.221231	0.0701072
frc	0	0	0	0.711701	-0.407641	0.069141	0.0582894	0.000583432	0.375241	-0.428059	0.0738862	-0.0811426	-0.0877457
cysZ	-0.31307	-0.901144	-0.381718	-0.352675	-0.26398	0.0464741	-0.0745952	-0.18369	-1.35687	0.711059	-0.039334	0.372107	0.0661399
pfkA	-0.871019	-0.108382	0.0344704	0.0584073	0	0.146923	0.710804	0	0.199501	0.271682	0.201563	0.060439	0.0158211
arnT	-0.576056	0.0764696	0	0.226247	0.0650262	-0.0581479	0.132712	0.151258	-0.0658095	0.176658	0	0.710428	0.0744848
yhhZ	0.217841	0.094017	0.153924	0.0443652	0.45502	0	0.0715766	0.268172	0	0.509468	0.709127	0.265201	0.507258
ydiH	-0.259532	0	0.0561116	0	-0.159239	0	0	0.45398	-0.0993941	0.336566	0.708971	-0.157569	0
tatE	-1.24603	0.19262	-0.154571	0	0.206413	-0.251169	0	0	0	0	-0.0026653	0.708968	-0.421603
yejA	0.0569431	0.125831	0.190143	0.296142	-0.495228	0.28977	0.129913	0.0254693	0.708195	0.382258	0.207201	-0.232845	0
pnp	-0.880826	-1.05914	-0.147907	0.707532	-0.445297	0	0.0720242	0.415741	-0.748342	-0.190366	-1.02216	-0.553029	-0.161826
nupC	-0.537487	-0.503208	-0.329624	0.707126	-0.321878	-0.209256	0.197136	0.0681097	-0.0351777	0.654604	-0.525508	-0.677118	0.196603
insF-4	0	0	0	0	0	0.14366	0.706531	0	0	0	-0.139152	0	0
leuT	0.00907753	0	0.116297	0	0	0	0	0.415037	0.0584569	0	0	0	0.706509
wbbC	0	0.043592	0	0.595763	0	0.264703	0.15856	0	0.706013	0.268269	-0.645227	0.197831	0
erfK	-0.769524	0	-0.476575	0.604396	0	0	0.667067	0.699425	0	0.112301	0	-0.969981	0.704858
ade	-0.0792996	0.441467	-0.349635	0.518825	0	0.637236	0.553132	-0.0544543	-0.242247	0.513512	0	0.534219	0.704851
pcnB	0.601063	-1.65561	-0.441659	-0.46503	0.704792	0.138152	0.685686	-0.352887	0.566778	-0.474449	0.606545	-0.366152	-0.534029
yhfS_1	-0.293408	0.58409	0.192116	0	0.242324	0.0491245	0	-0.0587555	0	0.704703	0	0	0
yajR	-0.365423	-0.534532	0	0.0683588	0.0766286	0.0958011	0.291214	0	-0.926327	0.704308	0.668384	0.246948	0
yqeH	0.0789117	0.570781	-0.252619	0.0490874	-0.063641	-0.177692	-0.446609	0	-1.24448	-1.043	0.424597	0	0.703307
ccmD	0	0	0.133272	0	0.31327	0	0.385054	0.278664	0	0.48105	0.398364	0.702446	0.150883
malM	0	0.00071665	0.184934	0	0.483785	0.191006	0.0349322	0.115006	0.702433	0.518799	0.251841	0.496659	0.346436
argC	-0.389484	-0.0592033	0	0.524956	0.0598693	0.150998	0.553375	0.330311	0.15374	0.701661	0.698696	0.232724	0.192436
nuoF	0.0640166	0	0.169417	0.109753	0.417976	0.357832	0.503904	0.137731	0	0.120156	0.635544	0.638206	0.701331
ubiX	-0.111256	-0.0791242	-0.0693087	0.189225	-0.183942	-0.0526779	0.700425	0	0	0.275172	0	-0.0961016	0.0698986
ybl55	0.19681	0	0.131317	0.0441638	0.278522	0.312732	-0.280083	-0.262592	0	0.0674388	0.324875	0.699955	0
dhaM	-0.0206078	0.0731499	0	0.218645	0	0.696133	0.408373	0.172742	-0.182341	0.699746	0.308394	0	0.346685
crl	0	0	0.0656772	0.222286	0	0.289234	0	0	0.440658	0.699056	0.333358	0	0.444493
gnd	-0.388595	-1.04474	-0.563156	0.326202	-0.684677	0.58352	0.699055	0.387678	-0.303552	-0.787539	0.180641	-0.0624477	0.480512
ygcW	0.123539	0	0.00429473	0.620759	0	0	0.0250932	-0.0664873	-0.0829853	0.298197	0	0.697844	0
yfaP	0	0.338247	0.0509719	0.412386	0.176007	0	0	0.0083092	0.102023	0.3977	0.697568	0.310243	0
ycjW	0	0.301697	0.0323347	0.0844465	0.539497	0.152284	0	0.153149	0.00578171	0	0.131001	0.697313	0.246568
ldcA	-0.191213	-0.642176	0	0.147605	0	0.177116	0.517628	0	0.697216	0	0.0764545	-0.292732	0.134301
fes	0	0	-0.072883	0.0991572	0.0319738	0.148178	0.696941	0.490841	-0.0523876	0	0.128801	-0.141689	0
rph	0	-0.0844354	0.140998	0	0	0	0	-0.0126626	0.540653	0.696545	0.00894197	0	0.0168072
yhhY	-0.603637	-0.224392	-0.174338	-0.202662	0.422022	0	0	0.0578909	-0.362065	0	0.57349	0.69593	0.452914
yfbM	0	0	0	0.389827	-0.040747	-0.433272	-0.127869	-0.212842	-0.217948	0	0	0	0.695207
yjjM	0.19448	0.0677833	0.133986	0	0	0.349352	0.0838274	0.112005	0.694786	0.57162	0.0743747	0.638227	0.404958
yfgF	-0.767515	-0.070388	-0.351284	0.160986	-0.927527	0.556649	0.668947	0.550887	0.694142	0.381164	-0.644413	0.317068	0.522464
tdcG	0	-0.311797	-0.221569	0.0596455	0	0.102175	0.394261	-0.243567	-0.265949	0.694012	0	0	0
ompC_2	-0.263954	-0.522484	0	0.0669444	-0.348442	0.138034	0.693762	0.342021	0.63872	-0.169035	-0.761826	-0.421456	0
rlmH	0.164238	0.338901	-0.09718	0.0670953	0.138789	0	0	-0.0356246	0.610313	0.693498	0	0.257514	-0.0299577
yeeF	-0.101867	-0.949943	0.274827	-0.078065	-0.0697192	0.691937	0.298392	0.588505	-0.335611	0.572689	0.46252	-0.146195	-0.100703
creC	0.224679	0.43023	0.0249317	0	-0.186452	-0.141019	0.095604	0	0.477022	0.69191	0	-0.281993	-0.644543
caiC	-0.23063	0	0	-0.00560803	-0.532079	0.0690011	0.0463092	0.0778205	0.458028	0.690362	0.236369	-0.0994759	0
ydhO	0	-0.409328	-0.278613	0	-0.286587	0.690299	0.586751	0.400089	-0.293509	0.308435	0	-0.105514	0
selA	-0.20571	0.0243734	-0.0296576	0.235882	0	-0.139497	-0.240731	-0.0265685	0.690137	0.596232	0.0106638	-0.151288	0.0131541
ybbN	-1.10391	0.0224539	0.231759	0.641576	0	0.370031	0.690099	0.528523	0	0	0	0	0.60048
ccmG	-0.137431	0.0947134	0.0012757	0.112144	0.0827881	0.197983	0.0957235	0.10159	0.011442	0.689557	0.218426	0.0163286	0.150422
frwB	-0.447498	-0.12828	-0.0730899	-0.147665	-0.0713868	0	-0.0296549	0.688844	0	0	0.259807	0.0543367	-0.233207
dksA	-0.460985	0	-0.384587	0.293319	0.242531	0.0300316	0.688751	0.265577	0.472949	0	0.00497534	0.42172	0.0398139
ccmH	-1.03185	-0.296482	0.0164169	-0.0131943	-0.172125	0.173735	0.451739	0	0.688541	0	0	-0.254826	0
torD	0.101093	-0.00151555	0.0120254	0	0.0181475	-0.00575615	-0.0432769	0.164871	0.27774	0.688438	0.110944	0	-0.11557
mntR	0.118577	0.382657	0.0946458	0.0681541	0.038592	0.10007	0.287754	0	0.569324	0.687843	0.357634	0.109284	0.447437
yciN	-0.628387	-0.0538942	-0.0447099	0.218517	0	0.386406	0.35392	0.378951	0.210506	0.686739	0.0931694	0	0.0655296
iscS	-0.672957	-0.544307	-0.580801	-0.498998	-0.034036	-0.386872	0.685891	-0.329109	-0.742745	-0.388558	-0.502999	-0.404299	-0.603917
ybbA	-0.11602	-0.0568577	0	0.0148858	0.271446	0.14992	0	0.414113	0.407803	0.685449	0.368756	0.00488741	-0.314826
ycjT	-0.0724887	0	-0.386167	0.685161	-0.623496	0.238352	0.00720785	0.37136	-0.28523	0.0531755	-0.467793	-0.386413	0.175477
ligA	0.209555	0.212246	-0.206077	0.33891	-0.450251	-0.605624	0.684028	0.0825701	0.0767534	-0.906363	0	-1.20666	0.0623923
fdoG	-0.437399	0	-0.407661	-0.0767272	-0.620805	0.373056	0.683579	-0.0543846	-1.16648	-0.510534	-1.22154	-1.90886	0.395862
hemN	0.120221	0.68356	-0.271756	0.185728	0.303885	0.382081	0.406096	0.388296	0	0	0	0.409898	0.0432303
ccmE	0	0.351208	0	0.153566	0.233624	0.108465	0	0.00274876	0.661101	0.683551	0.549209	0	0
nuoK	-0.330996	0	-0.01486	0	0.293901	0	-0.131892	0	0	0.683102	0	0.576227	0
dusB	-0.174618	0.236875	0.0934038	0.570904	-0.291959	0.384988	0.0825889	-0.166163	0.109513	-0.143866	0.682477	0.0795939	0
galS	0.1386	-0.044703	0	-0.0787189	0.109396	0.0649901	-0.0725664	0.22709	0.68226	0.259394	0.249357	0.450101	-0.212229
deoA	-0.597447	0.681938	-0.0491288	0.267123	-0.595705	0.433972	0.122043	0	0	0	0	-0.126404	0.102095
nikB	0.0484704	-0.00571281	-0.0736361	-0.00252559	0	0.353144	-0.104613	-0.214054	0.681759	0	-0.352858	-0.542772	-0.272739
wcaE	0	0	0	0	0	0	0	0	0.681381	0.0719851	0	0	0
yhhI	0.147914	0	0.024733	0	0.434083	0	-0.0494876	0	0.605181	0.681324	0.426028	0.462123	0.49164
gatY	0.00921156	0	-0.695813	-0.172157	-0.427864	0.681117	0.489809	0.365156	-0.622128	0	-0.156126	-0.406498	0.434435
pinR	0	0	-0.100542	0	0.134427	0.00149981	0	0.472478	0	0	0.186581	0.680628	0.644111
ycjG	0	-0.378177	0.237678	0.320822	0	0.0502978	0.0815919	0.0243573	0.105936	0.679885	0.0333205	-0.315495	-0.044674
nrdA	0.159839	-0.76363	-0.166562	-0.0956272	-0.35557	0	0.679505	-0.396757	-1.44427	-0.30266	0.115834	-0.878179	0.0585168
ycjV	0	0	0	0.0635737	-0.16757	0.210591	0.679413	0.0598858	0	-0.366893	-0.14525	0	0.0621228
ygjP	0	0.161669	0	0.194027	0	0.0653087	0.679399	0.124093	0	0	0.372456	0	0
rffM	-0.273069	-0.139057	-0.0119792	-0.193274	0.00340747	-0.105591	0	0	0.0808135	0.679186	0.336687	0	0.243704
ygfY	0	0	0	0	0	0.0346145	0.38604	0.136413	0	0.678488	0	0	0
araJ	-0.306725	0.0600708	-0.134223	0.131174	-0.343509	0.252098	-0.356848	-0.236963	0.677413	-0.0739122	0.0317775	-0.374182	-0.0742156
bglH	-0.0626446	-0.356771	-0.173783	-0.0646835	-0.36696	0.0640036	-0.0965926	-0.215742	-0.415923	0.124632	-0.155672	0.517609	0.677161
tus	0	0.0206044	0.116623	0.430999	-0.0672957	0.0272232	0.676609	-0.192728	0	0.0303598	-0.311186	-0.621714	0.598083
gnsA	0	0	0	0.231373	0	0.0701254	0.184376	0.228775	-0.791678	0	0	0.676127	0.150167
ygeV	-0.331846	-0.225	-0.0165018	-0.484721	-0.195548	-0.181038	0	0.0430933	0.676039	0	0.0753058	-0.0442316	0.0941265
arcA	-2.11369	0.675249	-2.16056	-1.43791	0.34483	0.275479	0	-1.69425	-3.28798	0	-0.819779	-2.67767	-0.300713
betT	-0.169812	-0.206272	0.0351642	-0.161485	-0.452377	0	0	0.130237	0.674993	0	0	-0.589494	0.439068
gpp	-0.338693	0	-0.067177	-0.187081	-0.133022	-0.0784234	-0.131122	-0.0689723	0.674795	0.17858	-0.141604	0.151053	-0.0283952
ydgI	0.673763	0	0.0701401	0.662599	-0.132259	0.267286	-0.168205	0.219868	-0.183511	0.299028	0.231443	0.204	-0.0278313
ycgZ	-0.273996	-0.139901	-0.150287	0	0	0.485039	-0.0956647	0	0	0	0.129394	0.673337	0
yjcZ	-0.0764295	0.33583	0	0	0.18529	0	0.232637	0.0925037	0.673276	-0.368216	-0.287737	-0.496432	-0.271911
ybl211	-0.404105	0.518039	0.295665	0.580139	-0.507704	-0.113877	-0.0737801	0.130361	0.0632876	-0.0144787	-0.131938	0.320992	0.671426
dcuA	-0.408019	0.0807678	-0.446574	0.0246259	-0.373039	0.585531	0.671296	0.173613	-0.474553	0	0	-0.514427	-0.282753
ybbY	0.263105	-0.291594	0.177855	-0.284023	-0.150021	-0.0901074	-0.0132868	-0.0812694	-0.230532	0.670788	0	0.00475665	0.270068
uxuA	-0.629177	-0.394397	-0.0458259	0.104692	-0.134955	0.19155	0.669748	0.573322	0.670742	0.57624	0.293336	-0.415234	-0.0684397
erpA	-0.104179	0.604489	-0.0894627	0.346517	0	0.149898	0.670595	0	0	0.648601	0.140662	0	0.634226
ybl150	0.270282	0.362787	0.153077	0.0220454	0.450647	0.296116	0.317833	-0.0338775	0.670002	0.425263	0.656227	0.37243	0.115589
yneJ	0.008168	0.201483	0.0733186	0.0617634	0.00326176	0.0467153	0.26666	0.0886207	0.386578	0.66938	0.408936	0.253046	0.623125
tauB	-0.143357	0.490443	0	0.397291	0.41879	0.37686	0.113533	0.407475	0.336111	0.668341	0	0	0.246521
gabD	-0.505353	-0.523587	-0.420339	0.667106	-0.243755	0.398959	0.271392	0.140997	0.234115	0.0726138	-0.481125	-0.833789	0.0054372
rpoH	-0.354472	0	-0.163025	0.468528	0.236683	0	0.477632	0.23707	0	0.129615	0.667089	0.260142	0
yfaD	0	0.125099	0	0.201864	-0.215611	0.422715	0.215349	0.455738	0.300288	0.666351	0.39149	0.0788325	0.185951
rplN	0.12931	0	-0.153835	0.666236	0	0	0	0	0	0	0	0.0364225	0
yafQ	-0.476354	0	0	0	0	0.0165061	0	-0.141353	0	0	0	0.665957	0
yeeL_2	0.132408	0.665677	0.185023	0.296799	0.331168	0.448949	0.332552	0.444756	0.557271	0.663327	0.435396	0.607317	0.413841
purU	-0.0741506	-0.210559	0	0	-0.0555244	0	0.143777	0.282343	-0.159934	0	0	0.144074	0.665129
dnaN	-0.471815	-0.533039	-0.129162	0	-0.369843	-0.115164	0.66454	0.582966	-0.0389045	-0.236057	-0.103526	0	-0.461487
pspA	0	0	0	0.197179	0.014074	0	0	0	0.210679	0.664373	0.585788	0.00285513	0
fixB	0.0234553	0.075027	0	0	0	0	0.282812	0.385778	0	0.663762	0.211198	0.339654	0.245683
ytfR	-0.146189	0	-0.0679117	-0.0226141	-0.114246	0.211623	0.561483	0.382157	0.663688	0	0	0	-0.0143438
speE	0.344386	0	0.195426	0	0	0.662906	0.11966	0.0172567	0.433544	0.0981954	0.38674	0	0.451692
yidZ	0.14855	-0.276613	-0.0117554	0.0754877	-0.320873	-0.170292	0.204867	-0.565052	0.662623	0	-0.626768	-0.147789	-0.0907514
fhlA	0.225436	-0.473757	-0.26605	0.66249	-0.657884	0.0455797	-0.0339716	-0.252396	-0.926143	0	0	-0.0787745	0.630338
sbcD	-0.197209	0	0.288856	0.305968	0	0.0974097	0	0	0.225368	0.617685	0.508611	0.661644	0.249467
pntB	-0.106572	0.125956	-0.166	0.265663	-0.0309307	0	0.660999	0.208207	-0.328221	0	0	-0.518751	0.0881971
mutM	-0.113181	0.376688	0.0729075	0.240936	0.466205	-0.102648	0.492876	-0.226805	-0.050343	0.225866	0.310723	0.660969	0.209459
yggL	0	0.326538	0.21114	0.384068	0	0	0.660396	0	-0.250629	0	0	-0.148882	0
ribB	0.659994	0.321291	0.0561287	0.0708589	-0.317352	0.324197	0.228878	0.055191	0.162715	0.0535559	0.0415854	0.12146	0.447362
ypfJ	-0.046838	-0.0886145	0.0762264	-0.139108	-0.0752793	-0.145648	0.0158605	-0.187824	-0.0520423	0.659865	0.0377154	0.0455079	0
miaB	-0.631653	-0.278322	-0.136937	-0.157185	-0.480307	-0.0464676	0.452236	0.384352	0	0.331207	-0.17936	0.241044	0.659067
yibN	0	0.0278626	0.0288646	0.434534	0	0.18734	0.658404	0.115818	0	0	0	0	0.442133
hokE	0	0.302563	-0.264826	-0.0655883	0	-2.01243	0.473931	-1.18396	-2.91566	-0.121562	0.36059	-0.451837	0.657894
secM	-0.03577	0.652884	-0.0721006	0.448848	-0.335328	-0.0367473	0.593042	0.0189823	-0.203022	0.657741	0.0791918	-0.0449264	-0.0327501
rhtB	0	0	0	0	0	0.150791	0	0.0498525	0	0.656	0.401576	0.155941	0
cpsB	-0.353496	0.139024	0.127337	0.436788	-0.100038	0.231693	0.207143	0.513069	0.229709	0.462689	0.245994	0.655256	0.49843
ybjG	0	0	0	0	0	0.126057	0	0.65512	0	0.54861	0.236649	0	0.392313
yghO	0.242183	0.53716	0.0804583	0.430446	-0.301366	0.381494	0.170588	0.0888269	0.655005	0.0616861	0.0731086	0.11129	0.356596
ybl10	-0.0519038	0.281752	0.211315	-0.378527	0.162487	0	-0.343421	0.0419008	0	0.65494	0.413965	0	0
yhjR	0.0458929	0	0.0492679	0	0	0	0.654272	0	0.200341	0.0817168	0	0	0
ychM	0.361282	0	0.116452	0.0446477	-0.0567052	0.00233807	0	0.318136	0	0.65329	0.0677369	0.241474	0.488932
rhoL	-0.281037	0.0498173	-0.043348	0.368015	0	0.481231	0.652917	0	-0.156073	0.200397	0	0	0
metA	-0.129623	0	0.24801	-0.0282647	-0.0997068	0.0908339	0.133452	0.0979334	0.488715	0.652572	0.30196	0	0
efp	0.502529	0	0	0.239849	-0.413279	0.650122	0	0	0	0.101474	0	-0.486313	0
secF	-0.639614	-0.729305	-0.257076	-0.0919506	-0.252638	-0.238122	-0.257166	0.219943	0.649055	-0.74841	0.420843	0	-0.0944479
kefF	0	0.144041	0.0505517	0.648794	0.0635799	0	0.180007	0.160551	-0.264691	0.635173	0.309955	0	0
yeiR	-0.173199	0	0.05166	0	-0.489935	0.372212	0	-0.338436	0.647992	0	0	-0.222946	-0.0678155
yggP	-0.300557	0	-0.431174	0.647913	-0.324514	0.00702585	0	0	-0.129754	-0.880238	-0.0680703	-0.333039	0
yiiR	-0.106938	-0.233365	0	0	-0.0220563	0	0.0369955	0.115092	0.647794	0	-0.291391	0	-0.222948
accB	-0.480848	-0.0411281	0.122703	0	0.25609	0	0.288889	0.129466	-0.418785	0.647675	0.0199704	0	0.0766114
yghZ	0	-0.0593769	0	0.647355	-0.0310809	0.157676	0.10405	0	0	0.53274	0	0	0
eutT	0	0	0	0.119403	0.150167	0	0.0472812	0	0.491896	0.646602	0.331567	0	0
hofB	0.0353489	-0.346879	-0.154959	0.0513296	0.347122	-0.0604083	0.44841	0.646579	-0.353415	0.4185	0.198334	0.019159	0.359244
manY	-0.455481	0	-0.380145	-0.0887317	-0.597778	0.603678	0.358887	0.422141	-0.0883305	0	0.645422	0.117591	-0.472705
ydeO	0.18592	0	0	0	0	-0.0976532	0.00321645	-0.0259471	0.645321	0.0401386	-0.247586	0	0.39997
asnA	0	0.00922762	-0.0110852	-0.107518	0	0.00344627	0	0.000698131	0	0.64401	0.235292	0.0462156	0.0410994
yjeJ	0.402618	0.350111	0.326375	0	0.226681	0.0735956	0	0.0559047	-0.414565	0.579961	0.513726	0.24743	0.64388
emtA	0	0	0.108844	0	0	0	0	0.0112862	0	0.642332	0	0	0
ppk	0	-0.632268	-0.402411	0.193336	-0.678511	0.115106	0.415184	0.296437	-0.331149	0.439035	-0.62388	-0.831018	0.642325
yjcF	-0.433977	-0.159297	-0.11509	0	0.244677	-0.0568602	-0.0690329	-0.0430608	-0.180382	0.200713	0.169517	0.642224	0.249189
ydcF	-0.546449	-0.768633	0.213658	0.103991	-0.190047	-0.14856	0.24336	0	0.192046	0.641936	0.141245	0.0029881	0.244458
cadC	0.103894	-0.2325	-0.35151	-1.05437	0.0667171	-0.366225	-1.01485	-0.337495	-2.19812	-1.93227	-0.611686	0.641843	-0.830887
gcvR	-0.297999	0	0	0.297771	-0.219828	0.303267	0.641664	0.44655	-0.0146574	0.330835	0.257958	0.00614156	0.422047
cutC	0.641356	-0.509023	0.272721	-0.0839615	-0.116162	-0.00962258	-0.119203	-0.206867	-0.214798	0	-0.0229147	0.031842	0.028914
rsmG	-0.013743	0.228905	0.101794	0.412792	-0.026392	0.183018	0.441361	0.250633	0.116089	0.463134	0.640294	0.557996	0.600538
fsaA	0	-0.0818687	0	0.0860864	0	0	0	0	-0.226058	0	0	0	0.640242
ubiF	-0.256124	0	0.151622	-0.0193795	0	0.247686	0	0	-0.319041	0.640083	0.153029	0.340681	0.322801
yjgL	0.0369201	-0.0189726	-0.14713	0.246871	0.264868	-0.101803	0.134063	0	-1.05934	0	0	0.639854	-0.353251
lnt	-0.0392441	0.377358	0.0572573	-0.0829242	0	-0.105434	0.226125	-0.083884	0	0.153271	0.639832	-0.142412	0.557392
yciQ_1	-0.148394	0.295597	0	0.0486357	0	0.359931	0.52879	0.0640681	0	0	0	0	0.639265
sppA	-0.450654	-0.075821	-0.11463	0.638694	-0.464086	-0.540599	0	0.0706783	-0.058678	0	0.0925557	-0.591328	-0.561822
ybfO	-0.00815053	-0.353898	0.0278563	0.357856	0.228216	0.00253498	0.0196007	-0.0147217	0	-0.0988407	-0.0107321	0.638414	0.0699769
ampH	-0.555886	-0.497611	-0.223674	0.187751	0	0.167012	0.296422	0.0672879	-0.0722983	0	0	-0.412146	0.63816
yibG	-0.172269	0.0524909	0.087552	-0.446107	0.479949	-0.0716704	0	-0.0963732	0	-0.494367	0.167185	0.637675	0
ycgX	0	0.257843	0	0.515944	0.270857	0.333965	0.637581	0.191747	0.290262	0	0.263571	0.160781	0.124551
gshA	0.0595241	0	-0.241686	0.36302	-0.219805	0.248693	0.191288	0.621748	0	0	-0.0318071	0.637044	0
ackA	-0.871913	0.404684	0.0265232	0.00182571	0.0189158	0.637014	0	0.113548	-0.665611	0	0.242198	0	0.128431
cysH	-0.237611	0.203266	-0.132217	0.255248	0	0.635482	0.596048	0.0363584	0.429323	0.251858	0.479789	0.108808	0.389034
ypjD	-0.716145	-0.765669	0	-0.180005	-0.471398	-0.443877	0.12894	-0.263575	-0.504502	-0.115221	0.297669	0	0.635412
kbl	0	-0.250402	-0.0453774	-0.0274219	-0.286514	0.117207	0	0	0.115312	0.635377	-0.332426	-0.19574	0.29624
fhuC	0	0.198903	0.0817768	0	0	0	0.0204169	0.0287234	0	0.396188	0.635149	0.0866819	0.290626
nadB	-0.796381	-0.331124	0	0.229831	-0.0834226	0	0	-0.146923	0.635077	0.294411	-0.148258	-0.35507	0.052155
ybjK	0.0243725	-0.287162	-0.199244	0	0	0.00782993	0.0468006	0.0872413	0.634899	-0.241262	-0.0741503	0	0
dkgB	0	0	0	0.286713	0.477426	-0.817623	0	0	0	0.634052	0	0.408203	0.34699
ygfQ	-0.210181	-0.232185	-0.0286101	0.386522	0.339378	0.328555	0.308794	0	-0.202264	0	0	0	0.633634
gltX	-0.82476	-1.11067	-0.475596	0.102739	0	-0.498194	0.559172	0.314083	-1.24393	-1.1108	-0.690766	0	0.633413
ygiN	0	0.429406	0.0528039	0.135574	0.125225	0.0139671	0.0193353	0.412131	0.631565	0	0	0	0.242558
matC	-0.439475	0.100432	-0.0316669	0.0198606	0.286242	0.0455811	0.192675	0	-0.219048	0.631245	0.229569	0.201299	-0.0701573
yhaL	0	0	-0.0593714	0	0	0.314526	0.371001	0	-0.142753	0	0.628721	0.0411671	0
glpE	-0.30878	0.0615222	0	0.0529253	0.327634	0	0	0.110556	0	0.62839	-0.171763	0.188062	0
wcaA	-0.119231	0.0374068	0.0770563	0.480057	0	0	0.627626	0.0610941	0.269374	0.315626	0.109554	0.222846	0
ybl89	0.160665	0.138532	0	-0.185928	0.277876	0	0	0	0	0	0	0.626888	0.478532
yebS	0.390022	0.245793	-0.0999451	0.242143	-0.0601208	0.280477	0.626875	0.0277224	0	0	0.131922	0	0.280543
sodB	0	-0.126171	0	0.0301624	-0.127508	0.0546241	0.31834	0.0203892	0	0.626846	0.497023	0	0.46191
yihM	0.164885	-0.349338	0	0.411894	0	0.281436	-0.00999496	-0.0198918	0.626565	0.502187	-0.0177756	0.277945	0.204147
ydeN	-0.906714	0.434948	-0.363266	-0.0383198	-0.269894	0.333575	0.211153	-0.365215	-0.38279	0	0.223445	0.0402415	0.625451
pitA	-0.509707	-0.61459	-0.182539	-0.0791673	-0.0315113	0	-0.183478	0.0175688	-0.295979	0.625359	0	0.0985498	0
wzxE	-0.37159	-0.213518	0.00318888	-0.0964868	0.0311778	0.417716	0.024357	0	0.00771135	0.625205	0	0	0.446072
guaD	0	-0.253708	-0.303569	-0.106333	-0.483418	-0.0642062	0	-0.401507	-0.0707479	-0.419647	-0.541166	-0.519553	0.625097
glnQ	0	0	-0.321031	0	0	-0.159441	-0.0465846	-0.0806748	0.625018	-0.303797	0	-0.661456	-0.139778
htpX	-0.0568587	0	-0.348548	0.160658	-0.497159	0.232367	0.624932	0.112059	-0.932431	0.61236	-0.117426	-0.787236	0
puuP	0	0.624921	-0.296921	-0.229543	-0.18	0	-0.495336	0	0.139897	-0.322424	0	-0.407341	0.158665
tisB	-0.230264	0	0.0911103	0	0.624398	0.061836	0.430385	0	-0.206973	0.349167	0	0	-0.0467078
ynfB	0	0.000805286	0.11974	0	0	0	0	0	0	0.624389	0.218257	0.374944	0.407523
ybeB	0	0.249752	0.040277	0	0	0.379864	-0.314977	0.187535	0.611499	0.328045	0.624112	0	0.40453
yjhC	-0.030963	0	0.143963	0	0.360567	0.22901	0.0313366	0	-0.519834	-1.02075	0.0628626	0.623571	-0.432098
nuoL	0	0.135398	0.0833977	-0.0467316	0.367753	0.622201	0.0140285	-0.0318307	-0.510375	0.271258	0.223192	-0.00954267	0.537272
gcl	-0.400674	-0.186872	0	0.481081	-0.355887	0.0705684	0	-0.59265	0.199403	0.621833	0.114521	-0.0829347	0.0492857
efeB	-0.473319	0.170749	-0.214592	0.621518	0	0.0674822	0	0.0524415	-0.235639	0.459239	0.104108	0.384404	-0.17689
pphB	0	0	0	0.0459748	0	0.138433	0.212471	0.0743106	0.620828	0	0	0.0224929	0
yjiC	0.160602	0.620814	0	0.148894	0.450424	0.0730082	0	0	0.103576	0.202146	0.42086	0.611016	0.0734474
pagP	0	0	0	0.267402	-0.0536066	0	0	-0.381178	0.370248	-0.356759	0.0401906	0.620727	0.226173
ynfA	-0.390827	0.226055	0.0874542	0.120479	0	0.352328	0.281237	0.146067	0	0.620667	0.254987	0.0450422	0
insAB-25	0.00130296	0.322271	0	0	0.0640308	0.22172	0.062374	0.261618	0.446997	0.620543	0	0	0.431899
yphC	-0.116473	0	-0.0511812	0.1416	0.140794	0.373214	0.540963	0.247483	-0.170938	0.620364	0	0.0147584	0.192146
yafK	-0.411553	-0.614131	-0.181711	-0.467935	-0.214014	0	0.619798	0	-0.322728	0	-0.582196	0.399174	-0.0256442
hofO	-0.304217	0.211536	0	0.00775401	0	0	0	0	0.619584	0	0	0	0
wzb	-0.00716002	0	0	0	0	0.0809195	0.0109402	0.0599343	0.00816607	0.618646	0.105739	0	0.0763806
prmA	-0.48268	-0.675282	-0.0280466	-0.248256	-0.276223	-0.275278	-0.443847	-0.177852	0.618578	-0.193713	-0.284802	-0.336861	0
fnr	-0.0966727	-0.0462252	0	0	-0.112146	-0.0733093	0.618377	0.474369	0.461833	-0.119845	0	-0.215406	0.190322
ycbV	0	0	0	0.204166	0.0100378	-0.113963	0	-0.0608422	0	0.618322	0.0317393	0	0
yeaJ	0	0	-0.184787	-0.0813094	-0.398217	0.355497	0.618246	0	-0.14662	-0.0525847	0.0394813	-0.084985	0.171744
hchA_2	0.278155	0	0	0	0	-0.00164311	0	0	-0.27328	0	0	0.617395	-0.012128
ygcU	-0.425724	0.326109	0.124866	0	-0.183655	0	-0.160611	0	0.617078	-0.169846	0.259872	0.427026	0.546564
sodA	-0.114867	-0.0888312	-0.294765	-0.041723	-0.12341	0	0.616794	0.211102	-0.525106	0.0980472	0	0	-0.149066
bcsE	0	0.20621	0.0487559	0	0	0.06866	0.109094	0.0566992	0.244072	0.616721	0	0	0.243354
yjdA	0.397221	0.0675267	0	-0.56278	-0.0231541	0.134161	0.0171521	0.456853	0.140691	0.616523	0.374961	-0.880404	-0.337079
glpG	-0.105878	0	0.0308786	0	0	0.376958	0.616443	0	0.341546	0.564582	0	0.0635807	0.298556
sohA	0.138639	0.211133	0	0.26715	0.241951	0.117493	0.616333	0.0853304	0.21411	0.486418	0.554744	0.0776731	0
yrhA	0	0	0	0	0.616233	0	0	0	0.0818588	0.262783	0	0.477	0.276966
infB	0.553023	-0.140766	-0.199204	0.0760449	-1.27414	-0.0282918	0.615564	-0.180295	-0.905548	-0.933374	-1.30583	-1.41004	0.16801
etk	-0.582477	0	0	0.111226	-0.014948	-0.0323714	0.61483	0	0.182021	-0.0489697	0	0	0
ybl157	-0.307347	0.168476	0.0385849	0	0.334284	0	0.0344597	-0.358503	0.0727016	0	0.203712	0.614518	0.414803
ilvM	0	0	0	0	0.0633494	0	0	0.104897	0.0203766	0.203972	0.614087	0.172177	0
hspQ	0	0	0	0	0.00854322	0.0274874	0.0842913	0.613861	0	0.12545	0.0586207	0.30433	0.143149
tmk	0	0	0.124931	0	0.100791	0.613747	0.349014	0	0.0431748	0.592898	0.152117	0.542813	-0.0203367
ylbA	-0.118287	0.226322	0	0.130469	-0.278316	0	0.312171	0.0422742	0.383612	0.613618	0.521148	0	0.0605974
yhaI	0.0955853	0	0	0.332304	0	0	0	0	0	0.0638036	0	0	0.61306
yjeS	0	-0.23484	0.170537	0.303476	-0.279276	0.45492	-0.0878313	-0.383691	-0.46183	-0.694211	0.613038	-0.568099	0.0349703
treC	-0.0430866	0.451222	0.048963	0.0914125	0.0150496	0.0704091	0.109647	-0.0568166	0.305648	0.613003	0.34187	0.0703266	0.330566
yjaG	-0.638025	0	-0.439904	0	0	0	0.385163	0.612844	0	0	0	0	0
ycgE	0	0	0.0833354	0	0	0.0218103	0	0.0309772	0.151413	0.216476	0.612833	-0.0317965	0.351007
yiaW	0	0.184007	0	0.117302	0.0563165	0.0251826	-0.0729849	0.0591126	0.612601	0.407091	0.0828478	0.461953	-0.0602033
leuS	0.445458	0.382196	0.207576	-0.61855	0.612257	0.0218942	-0.126731	-0.218367	0.505871	-0.642358	-0.724574	-0.0616113	-0.150287
yncH	0	0	0	-0.0247705	0.611868	0.247276	-0.335303	-0.162497	0	0	0	0.165089	0
thrC	-0.258838	0	-0.175557	0.0470631	-0.298301	0.149221	0.127992	0.099399	0.179446	0.611519	0.116122	0	0.398569
ycfH	-0.854992	-0.0809433	-0.74267	-0.0524939	-0.352629	0.203372	0.32713	0.611484	-0.470095	-0.0642179	0	-0.42587	0.0490837
arsC	-0.171841	-0.00743484	0	-0.0569861	0.0909343	0.240754	0.100049	0	0	0.447881	0.221178	0.611277	0.346059
fruK	-0.0766676	-0.621969	-0.142517	0.011793	0.0351545	0.290746	0.357545	0.381797	0	0.413198	0.610974	0.126767	0.0186672
trg	-0.100703	-0.0529902	-0.0306871	0.218871	-0.333511	0.174471	0.107572	0.610965	0.346278	0.296509	-0.414675	0	0.585955
intB	-0.205235	0.0804146	0	-0.188516	-0.0387808	0.117078	0.200882	0.11777	0	0.184996	0.286475	-0.0683698	0.610787
flgH	0	-0.0185852	0.00610238	0.32726	0.0934855	0.223059	0.1022	-0.191871	0.36496	0	0.610684	0	0.0663088
yciW	-0.0617665	-0.272553	-0.140409	-0.291885	-0.354383	-0.114456	-0.266829	-0.0957392	0.610242	0	-0.090114	-0.857349	-0.302678
kch	0	-0.0218211	-0.205324	0	-0.127322	-0.458432	0.610225	-0.363533	0.0520708	-0.433869	-0.0311844	0	0
lpd	-0.861877	-0.178915	0.310756	0.61007	-0.153147	0.34216	0.558697	0	0	0.0243407	0.443655	-0.340709	0.599497
ygjJ	-0.141746	0.304331	-0.0760453	-0.013796	0	0	0.610014	0	0.495232	0.348451	0.233087	0.290194	-0.0328895
nrdB	-0.0314941	0	0	-0.00923473	0	0.0924796	0	0	0.609543	0.311336	0	0.299871	0
ybl121	-0.141819	0.0501024	-0.32561	0.516132	-0.0482167	-0.00373271	0.556472	-0.0519764	-0.191587	-0.387047	0.204314	-0.161684	0.609247
bioH	0.0852453	0.0255354	0.0700889	0	0	0.00317068	0.0462069	0	0.385457	0.608647	0	0.274959	0
fecR	-0.422568	-0.387978	-0.114499	-0.173483	0.102555	-0.241743	-0.247621	-0.439174	0.608028	-0.57762	-0.180448	-0.0467332	-0.276283
yshB	-0.322735	0	0	0.193161	0.101662	0	0.0477202	0	0.479106	0.607926	0.177679	0.102812	0
yifL	0	0.23614	-0.0593759	0.607919	-0.192329	0	0	0	0.374688	0.0272468	0	-0.0180203	0
yqgE	-0.148911	0.607673	0.270169	0.104298	0.173754	0	0.452062	0	0	0.413395	0.346215	0.179037	0
ycbU	0	0.282562	0.0356015	0.0843157	0.275769	0	-0.234163	0.0187268	0.0290372	0	0.0836597	0.607429	0
rsmE	-0.42611	0	0	0.355409	0	0.23694	0	0	0	0.607375	0.0331216	0.595531	0
hupB	-0.432873	-0.358002	-0.328087	-1.38912	0.28703	-0.493455	-1.26464	-0.838103	-1.77976	-1.24346	-0.2164	0.607102	0.463647
clpP	-0.484569	-0.309371	-0.234465	-0.327493	-0.19397	-0.751083	-0.198421	0.606727	-0.177139	-0.29261	-0.538565	-0.0652302	-0.474173
ythA	-0.174673	-0.366201	0	0.605726	0	0	0	-0.167356	0	0	0	0	0
ampG	-0.315236	0	0.151789	0.230602	0	0	0.428988	0.301668	0.605186	0	-0.0329642	0.489152	0
ybl184	0	0	-0.05552	0	0	0	0.0548829	0	0	0.60415	0	0	-0.00659851
ytfT	-0.216241	-0.148308	0	0.0577395	0.110311	0.0618248	0	0.60402	0.255698	0	-0.0727254	-0.27977	-0.277242
hpt	-0.262575	0.60363	0.0979673	0	0.10813	0.196648	0	0	0	0	0	0.0598145	0
dhaK	-0.191675	0.0741462	-0.0655803	-0.0566156	-0.12138	-0.16096	-0.0388455	-0.381521	0.602548	-0.027779	-0.430337	0	0.0863224
plsC	-0.143508	0	0.0303609	0	0	0.57492	0.134098	-0.162585	0.0758738	0.602259	0.44068	0.0822415	0.389599
tehB	-0.172467	0	-0.0374045	0	-0.0436603	0.166585	0	0.137577	0.0610058	0.346513	0.0717422	0	0.601911
sgbE	0	-0.0951936	-0.109567	0	0	0.0525263	0.13425	0.21459	0	0.600666	0	-0.247895	0.0201205
ybaT	0.188432	0	0	0.0307634	-0.0871555	-0.0774832	0	0.328801	0.599087	0.395557	-0.200342	0.192427	-0.394937
chpA	-0.489588	0.24118	0.0667341	0.145794	-0.0495699	0	0	0	0.59766	0.0983102	0.213268	-0.505284	-0.0412898
malY	-0.206096	0.597653	-0.0118825	0.593363	-0.112233	0.355639	0.258515	0.310921	0.0942609	0.57125	-0.122635	0	0.0810666
yfaT	0	0.0643562	-0.0372345	-0.0329611	-0.160914	-0.0556869	-0.115748	0.597531	-0.135531	0.259579	0	-0.171259	0.114479
ybfN	-0.0212753	0	0	-0.0290856	0.15338	0	0.251063	0	0	0	0	0	0.59667
thiQ	0.0423213	0	-0.0934466	0	0.0908821	0.136346	0.160387	0.321701	-0.305619	0.596645	0.371608	0	-0.185855
rplX	-1.58727	0.156172	-0.776723	-0.127017	-0.870749	-0.231353	0.350788	-0.383356	-0.684611	0	0.0557542	0.142957	0.596466
ybdG	0	0	0	-0.222208	-0.108868	0.0847917	-0.10425	0.0557687	-0.014189	0.596229	0.071191	0.0910021	0.356213
yibT	-0.0611113	0	0	0.0190689	0	0	0	0	0.0693519	0.595633	0	0	0
otsB	-0.308321	-0.0814954	-0.022015	0	-0.172788	-0.046663	0	0	0.595425	0	-0.353838	-0.596181	-0.14288
yqiH	-0.323842	-0.189859	0	0	-0.0784186	-0.0190231	0.0511629	-0.0310713	0.595178	-0.389907	0.216572	0.344219	0.248835
yajC	0	0	-0.213051	0	0.34627	-0.194723	0	-0.330847	0	0.594774	0.223762	-0.120278	-0.26496
eutM	0	0	0.0818922	-0.186964	0	-0.0316734	0	0	0	0.594503	0	0	0
ymgC	0	0.158658	0	0.152945	0.136288	0.0532705	-0.00584706	0	-0.442232	-0.0121123	0.0789847	0.00491594	0.594165
rbsR	-0.14262	-0.128618	0	0	-0.0674076	0.01241	0.100729	0.204922	0.593503	0.451158	0.0636439	0.127183	0
srlA	0.076848	0	-0.276094	-0.399083	0	-0.0261073	0	0	0	0.593408	-0.594488	-0.152658	-0.174857
rpsI	-0.017288	0	-0.579584	-0.015526	-0.379495	-0.535769	-0.122288	0.592532	0	-0.505791	-0.745735	0	-0.0857324
lgt	0	0.592134	-0.185524	0.113695	-0.249582	0.120451	0.173152	0.0501456	0.215846	0	-0.389415	-0.548774	0.0646205
ybiX	0.185025	0	0.0715537	0.277205	0.00610584	0.200251	0.575111	0	0.198391	0.592109	0	0.281998	0
allB	-0.204799	-0.462575	0.136853	0.459406	-0.552641	-0.0207198	0.106444	0.127577	0.41597	0.393835	0.591564	0.0121852	0.205861
yfaY	-0.191596	0	-0.0802174	0.170613	-0.153359	0	0.207677	0.59142	0	0.485366	0.463701	0.0354249	0
hemX	-0.4209	-0.488459	0.0364265	0	-0.0821001	0	0.104674	0.013863	0.591211	0.435046	-0.0422947	-0.282404	0.0579246
dcuD	0	0.590939	0.0608431	0.564445	0	0.139406	0	-0.0448705	0	-0.158231	0.462718	0.0611747	-0.240282
pgpB	0	0.291607	0.0210952	0	-0.0688564	0.420084	0.226814	0.466843	-0.0183774	0.492192	0.080303	0.590637	0.544364
ybiS	-0.520753	-0.297311	-0.160384	0	0.00317933	-0.174374	-0.222819	0.249509	-0.743853	0.590458	-0.393931	-0.415587	0
pstA	0.0581855	-0.0424355	-0.15851	0.440524	-0.056205	0.590252	0	-0.0243887	0	0	-0.072611	-0.282002	0.153303
fbp	0	-0.138325	0.0746316	0.29545	-0.339368	0.416266	0.414109	0.361548	-0.294845	0.254491	0.115776	0	0.589994
rof	0.543247	-0.0412884	0	0.450681	0.0224899	0.0162312	0.589864	0.133943	0	0	0.211498	0.564275	0.49451
pscG	-0.460255	-0.229524	0	-0.284224	-0.113952	0.126433	0.588584	0.0378111	-0.168177	-0.393568	-0.0208522	-0.0198976	-0.0571294
rfaQ	0	-0.240226	-0.091039	0.207285	0.00652056	0.0716766	0.416869	0.0442403	0.243596	0.195262	0.123619	0.477354	0.588444
yaaU	-0.278423	-0.652883	0	-0.0433306	-0.439906	0.0477611	0.588344	0.181897	-0.0751561	-0.00501953	0	0	0.233973
ygjH	0	0	0.23552	0.0894757	0	0.129291	0.108588	-0.117189	0	0.586226	0	0	0
sbcB	-0.367844	-0.17025	-0.0818822	0	-0.508938	0.160673	0.082636	0.105426	0.58597	-0.657383	-0.21369	-0.207653	-0.0439597
evgA	0.104485	0	-0.100529	0.111581	-0.135218	0.0197598	0.405403	-0.143161	0.583494	0.0309542	0.192201	0.585887	0.15478
ybl75	0.0518228	0.253977	0.0461225	0	0.340876	0.122774	0	0	0	0.576228	0	0.585044	0.368195
gltA	0.550856	-0.366946	0.0863895	0.000328683	-0.41286	-0.131876	0.0812745	0	0.539343	0.516857	0	0	0.584723
ompA	-0.742163	0	-0.0263796	-0.28817	-0.140603	0.135814	0.584683	-0.14139	-0.497311	0.000595192	-0.103191	-1.17637	0.435313
leuE	-0.692219	-0.27022	-0.288635	-0.0682898	-0.273609	0.0702307	0.584164	0	-0.558871	0	0	0	0
araH	-0.017789	-0.11177	0.0839041	0.271782	0.0271263	0.348436	0.350004	0.285832	0.08637	0.583803	0.00584063	0	0.0888306
yehE_1	0	-0.479032	0.105178	-0.333714	0	-0.021712	0	-0.0523529	0.583496	0	0	0	0
rhaB	0	-0.155044	0	0.199297	0.087756	-0.0311578	-0.400098	-0.273892	0.162988	0.583275	0.0139401	0.00830832	-0.10258
grxD	-0.444622	0.0278904	-0.279244	0.583111	-0.498498	0	-0.159753	-0.0521328	-0.728603	0	-0.419292	-0.463042	-0.0822907
ybl131	0	0.562478	-0.0226903	0.0102918	0.0864197	0.275982	0	-0.0033715	-0.030069	-0.0339842	0.124255	0.415562	0.582619
eutK	0	-0.267026	0	0	0	0	0	0	0.582097	0.226138	0	0	-0.288285
frvX	-0.295372	0	-0.0180228	0	0	0	0.455634	0.446669	0.320054	0.582065	0.0874766	0.271588	-0.156044
potF	0	0	0	0.125973	-0.412086	0.0583194	0	0.0982485	0	0	0	0.0159089	0.581995
ybeZ	0.0497852	0	-0.00387254	0.142514	-0.102716	0.320531	0.345497	0.0647145	0.581427	0.411398	0.143775	-0.167826	0.0251274
mrdB	-0.066007	0.128729	0	-0.00525373	-0.0277117	0.384987	-0.0516693	-0.106803	-0.462766	0.580991	0.209251	-0.221236	0.0563772
dapD	-0.149785	0.0699842	-0.0114084	0	-0.135001	0.44809	0	0.295456	0.0932175	0.580893	0.166844	-0.0634508	-0.30864
prlC	-0.167881	0.217654	-0.10019	0	0	0.0900216	0.384236	-0.126032	0.00179475	0.580864	0.572602	-0.326642	-0.291796
insAB-4	0	0	-0.043878	0.531316	0	0	0	0.580575	-0.0241628	0.0243474	0	0	0
nmpC_1	0.579827	0.401735	-0.0810944	0	0.053888	-0.231862	0	0	0	0	-0.279971	0	-0.227783
yiaO	-0.143456	0.00248474	-0.043829	-0.157038	0	0	-0.108034	0	0	0	0	0	0.579643
zupT	0	0	0	0.579498	0	-0.263371	0.261496	-0.162269	-0.266405	-0.0858438	-0.00568291	0	-0.119427
yffB	0	0.0401394	0	0	0.313498	0	0	0	0.297752	0	0.578856	0	0.356145
nhaA	-0.0931756	-0.641529	-0.109669	0	-0.453072	-0.0535679	0.0250047	-0.0575544	-0.855908	-0.456286	-0.348339	-0.322333	0.578186
pepD	-0.690801	0.577455	0	0.138164	-0.0875723	0	0.215793	-0.0334725	-0.404608	0.458515	0.173295	-0.134192	0.323516
insN-2	0	0	0	0	-0.215739	-0.230013	0	-0.164557	0.411211	-0.14999	0	0	0.577318
elaD	-0.391192	-0.084117	0.0585639	-0.122937	0.312229	-0.249519	0.191885	0.0729889	0.499593	-0.548041	-0.018927	0	0.577256
ycbF	-0.23594	-0.217777	0.173758	0	0	0.0354899	0.576786	0	0.462986	0.431663	0.30517	0	-0.0657073
prs	-0.462487	-0.473724	-0.0132271	-0.0732265	-0.0741122	0	0.0970693	0.0963738	-0.912278	0.180167	0	0.574715	0.248291
dpiB	0	0.179357	0.129324	0.574234	-0.354682	0	-0.104412	-0.186279	-0.605803	0	-0.300969	-0.708645	0.0271235
purR	-0.975407	-0.193173	-0.468643	-0.0712615	0	0.0784545	0.573128	0	-0.039868	0	-0.61817	-0.458581	0.0143706
dtd	0	0.166924	0	0	0	-0.0502414	0.389932	0	0.0407137	0.552044	0.572807	-0.10965	0.0260036
cycA	0.100945	-0.320004	0	0	-0.414435	0.572701	0.125319	-0.237772	-0.212361	0	-0.0143037	-0.0416992	0
pykA	-0.567842	-0.34022	-0.129174	0.572439	-0.630104	-0.0202412	0.279121	0.0914845	-1.08183	-0.332999	-0.961149	-0.995748	-0.203146
cheR	0.181307	0.190858	0.0470326	0.188462	0	0.57197	0.000396366	0.103483	0.511478	0	0	0	-0.176674
yebK	-1.02557	-0.460169	-0.270433	0.284534	-0.724695	-0.289336	-0.136918	-0.295365	0.571681	-0.0296825	-0.697263	-0.694065	0.234535
argV	-0.812188	0	0	-0.242885	0.571408	0	0	0	0	0	0	0	0.110141
napC	-0.135987	0	0.0472257	-0.0358374	-0.00877368	0	0	-0.197558	0.570846	0.265118	0	0.115078	-0.299707
ybl196	0	0.570369	0	0	0.00725204	-0.130205	0	0.225297	0.436804	0.15138	-0.119631	0.173488	0
ydcJ	0	0.34867	-0.112051	0.570246	-0.247768	-0.675449	-0.0130536	-0.291606	-0.102477	-0.240482	-0.236193	0.0963604	-0.0713749
dppA	-0.324643	-0.946475	-0.354123	-0.31042	-0.708581	0.569726	0.321431	0.103667	-0.609686	0.284222	-1.16553	-0.640162	-0.127789
fadL	0.569214	-0.148579	0.191004	-0.191082	0	0.0873593	-0.149562	-0.108556	-1.12237	-0.385101	-0.667043	0.055634	0.0406198
argZ	0	0	-0.0358843	0	0	0.344442	0	0	-0.568617	0.568575	-0.0309959	0	-0.136229
yjhP	-0.372235	-0.151459	-0.136273	-0.226952	-0.225145	-0.264921	0.568157	0	-0.179114	0.176083	0	-0.00784898	-0.286566
ypdI	0	0.232469	0	0	0	0.103271	0.119672	-0.267722	0	-0.00701524	0	0.56807	0
kptA	0	0	0.0264049	0.443153	0.245215	0.123268	0	0.328496	0.126584	0.567632	0.27065	0.123082	0.088466
guaB	-0.284016	-0.294592	-0.0468944	0.342409	-0.428267	-0.0714483	0.371155	0.374042	-0.327048	0.567564	0.0597925	-0.281709	-0.261849
pbpG	-0.208308	0.0987774	0	0	-0.0734448	0	0	0.199508	0	0.567358	0.105362	0	0.281734
nadA	-0.331075	-0.422582	-0.151516	0	-0.200407	0	0	0	0	0	-0.13408	-0.682303	0.567229
mhpE	-0.948559	-0.182501	-0.04817	-0.101045	-0.00140157	-0.0749415	0.212487	-0.119306	0.158703	0.566922	0	0	-0.442415
ghrB	-0.379681	0.0919747	0	0	-0.115393	0	0.324195	0.117825	0.566897	-0.278111	0	0	0
cmtA	-0.278352	-0.282827	0	0.141431	-0.12526	0.057206	0.0591496	0.0356212	0.469703	-0.120907	-0.44736	0	0.5665
insB-22	0	0	0	0	0.113925	-0.174847	-0.077957	0	0	0	0	0.566279	0
thiF	0.0874517	0.355173	-0.00628872	0	0.212697	0	0.136204	0.182848	-0.120956	0.565498	0	0	-0.00894651
phoP	-0.172289	0	-0.081489	0.565142	-0.0832642	0.0394526	0.427589	0.136254	0.394602	-0.183138	0	0	-0.180534
glpC	0.107821	0.565094	0	0.337978	0.0464084	-0.00638546	0.477043	0.217139	0	0.455986	0.431638	0.504796	-0.0776532
bioC	0	0.0502559	0	0.11362	0.312809	-0.185908	0	-0.0102366	0	0.564982	0.116556	0	0
mrp	-0.535404	-0.0209662	-0.0592376	0.0705452	-0.477423	-0.0254857	0.56495	0.389694	0	0.0300735	-0.237407	-0.359071	0.0289978
narY	-0.66831	-0.687606	-0.296916	0	-0.146363	0.0273468	0.154014	0.419132	-1.00542	0.56356	-0.212766	-0.613753	-0.066466
ybl120	-0.270729	-0.0737464	-0.164351	0.272704	-0.57654	0.440781	0.563543	0.311171	-1.08345	-0.394422	-0.0834949	-0.646071	0
mppA	0.258201	-1.42936	-0.222851	0.397977	-0.856045	0.562903	0.449346	0.262976	0.352558	0	-1.19387	0	-0.161839
hypA	-0.101943	0	-0.00492823	0	0	0	0.0555855	0.0226848	0.308957	0.562766	0.0211865	0	0
ygfM	-0.3241	0.332024	0.0417464	0	0	0.101894	0	0	0.044445	0.562592	0	0	0.304332
gadE	0.0322084	0.0222233	0	-0.102862	0	0	-0.339665	-0.304999	0.562292	-0.516007	-0.350504	0	0.339933
rimM	-0.121052	0	0	0.344056	-0.337312	0	0.562049	0.178428	0	0	-0.598744	-0.26197	0.0691025
rpsQ	0	-0.239926	0	0.0788745	0	0.210255	0.561715	0	0	-0.395838	-0.03453	-0.242387	0
astB	-0.286207	0.367692	-0.0613593	0	0	0	-0.0749905	0	0.224957	0.5616	-0.00753673	-0.0891927	0.134681
slyB	-0.522068	-0.562308	-0.854169	0.164525	-0.326696	0.336743	0.56151	0	0	-0.436841	-0.481821	0.187281	0.484058
ypfM	-0.0326066	-0.00541695	0	0.452484	0	0.0957211	0	0.370288	0.190573	0.560841	0.00305138	0.150843	0.0609094
uspB	0	-0.191089	0	-0.198615	-0.495215	-0.374487	0	-0.0159154	0	0	-0.219264	-0.25732	0.56069
coaD	0	0	0	0	0	0	0	0	0.310184	0.560087	0.309561	0.0789664	-0.0830875
aroD	0.150081	0	0	0.151037	-0.125314	0	-0.0258439	0.220134	0.560086	0	0	0.282047	0
sufAB	0	0.111148	-0.0493601	-0.0766955	0	0	0	0	-0.277905	0.147189	0.0591806	0	0.559251
aaeA	-0.349401	0.0560715	0	0.416	-0.0565752	0.55851	0.148131	0	0	0	0.0735347	0	0
trxC	-0.396335	-0.142694	0	0.0833379	-0.374001	0	0.117236	0	0	0.207008	0.55843	-0.232714	-0.128496
ribE	0	0.220633	0.123124	0.0467049	0	0.109218	0.558032	0	0.411977	0	0	0	0.432009
yidQ	0	0.00787707	0.0703484	0.299651	-0.0996998	0.26402	0.195768	0.305423	0	0	0	0.557178	-0.0565724
ycfJ	0.276928	0.35944	0	0	-0.0897545	0.275646	0.294053	0	0	0.556767	0.432529	0.443676	0
yadI	0	0	0	0.556076	-0.0191252	0	0	0.19759	0	0.00644927	0	-0.16611	0
dsdX	0	0.204566	-0.424187	0.424142	-0.544108	0.16211	0.555924	-0.220839	-0.925566	0.409139	-0.239874	-0.692306	-0.128701
lolA	-0.24514	-0.121043	0.0926081	-0.770612	-0.040129	-0.301828	-0.190851	0.55575	0.065105	-0.0741211	-0.464467	-0.667509	-0.69621
yhgN	-0.301843	0	-0.108773	-0.0451311	0	0.0722172	0.39032	0.0543901	0.555089	0.386167	0	0.1547	0
emrK	-0.49429	0.381012	0	-0.0479613	-0.644108	0.325597	0.0333075	0.00546557	0.381675	-0.616817	0.05606	-0.667201	0.555074
nadC	0.0537987	0	0	0	0	0	0	0	0.554819	0.26786	0.108384	0.154504	0
yihP	0.086577	-0.448998	-0.145544	-0.282624	-0.43729	-0.311103	-0.129398	-0.650695	0.554412	-0.196306	-0.714866	-0.807343	-0.324155
groS	-0.0209548	0	0	0	0	0.188533	0.554044	0.0033835	0	0.341936	0	-0.112916	0
gatC	0	0.460447	0	0	0.113025	0.358065	0.553881	0	0.20365	0.260148	0.119345	0	0.0701789
yrdD	0.271661	0	-0.126913	0.247031	0	0.0951541	0	0.0778581	0	0.55316	0.422858	0	0
yidD	0	-0.53775	0	0	-0.345408	0.3245	0.552836	-0.0434025	-0.957309	-0.767405	-0.4977	0	0
yheS	-0.231323	-0.219613	-0.0263462	-0.272153	-0.251654	-0.0697251	-0.137119	0.423073	0	0.552583	-0.181562	-0.284473	0.121952
leuD	-0.0310344	0.167647	0	0.552117	0	0.518295	0.377168	0.355312	0.403185	0.341307	0.184285	0.0101154	0.0872931
lysC	-0.225082	-0.218411	-0.109677	0.245543	0.20908	0.171806	0.365015	0.327372	-0.0989475	0.302478	0.209996	-0.251996	0.552057
ptsN	0	0	0.228151	0	0	0	-0.00820429	0	0.342961	0.551359	0.55164	0	0
ybl195	0	0.208803	0.0979129	0.188721	0.206727	0.117795	0.0134919	0.114105	0.121357	0.551367	0.143908	0.440747	0.184521
fepE	0	0.551297	-0.246851	0.214952	-0.390283	0.314134	0.223046	-0.300358	-0.524942	-0.349212	0.422385	0	0.341074
tolC	0.25814	-0.292795	0	-0.246083	-0.132606	0.550631	0.305414	0.0690837	0	-0.465001	0	0.000548574	0.35541
yigM	-0.362856	0	0.0276397	0.019099	0	-0.00469459	0	0.165262	0.550289	0	0	0.0210046	0
citC	0.0925726	3.22445e-05	0.176142	0.335438	-0.558129	0	0	0.375988	0.550245	-0.0624298	0.0729455	-0.582132	0.394095
yheM	0	0.12186	0	0	0.108033	0.0543675	0	0.202265	0.445085	-0.198891	0	0	0.54969
yigF	0	0	0	0	0.0167591	-0.00601879	-0.0936149	0	0.0889974	-0.520063	0	0.549449	0
nanA	-0.067035	-0.151474	-0.139322	0.0193098	-0.0510721	-0.110587	0.00265885	-0.50008	0.549326	-0.459835	-0.141466	-0.289508	0.185531
fkpA	-0.0553622	0	-0.286617	0.377139	-0.162531	0.210592	0.115081	0.40071	-0.637245	0.0332016	0	-0.0513658	0.549067
serX	-0.473028	0	-0.00911094	0.548837	0.312759	0.215892	0.238428	0.0272003	-0.224734	0.0462811	-0.196431	0.0468507	0.158155
yiaG	-0.388173	-1.45544	0	0.47398	-0.361916	-0.307512	0.422479	0.342311	0	-0.0464445	0	0.0963801	0.548279
sgrR	-0.179787	-0.506428	-0.170355	0.0917977	-0.467595	-0.0767632	-0.382092	0.0134084	0.54819	0	-0.384149	-0.46709	-0.0412867
ycgF	-0.439602	-0.28262	-0.201609	0.135291	-0.123702	0.333527	0.429677	0	0	0.546849	-0.155318	0.226627	0.142551
napB	-0.0387286	-0.397073	0	0	-0.0280661	0.196447	0	0	0.134636	0.12195	0.118748	0.546649	0.0998006
pgaC	-0.228799	0.157634	-0.158952	0	0	0.061919	0.546342	-0.0944301	0.0867795	-0.019161	-0.331435	-0.153407	-0.0705186
ybl30	0	0.014802	0	0	0	0.0853146	0.546323	0	-0.306139	0	0	0	0
xanP	-0.328909	-0.343394	-0.00170441	-0.313405	-0.315314	-0.0609404	-0.439515	0.110749	0.5462	-0.0614371	0.035523	-0.365976	0.024797
gabP	-0.451863	-0.209815	-0.333978	0.248881	-0.337826	0.545584	0.492861	0.162175	0.350772	0.281303	-0.292799	-0.428269	-0.0349304
adiC	-0.253563	-0.054558	-0.149471	-0.0288514	-0.0288354	-0.124169	0.545402	0.360186	0.0394642	0.183961	-0.0518412	0.251944	-0.0863243
ybhM	0.113609	0	0.205807	0.194875	0	0	0.0279255	0.118605	0.23968	0.227672	0.251097	0.544746	0.143751
glcC	0.0786274	-0.00711525	0.0109068	0	-0.0739228	0	-0.0179074	0	0.0968482	0.544691	0	0	0
fimB	-0.296348	0.0681577	0.0624099	0	0.157288	0.188435	0.0672762	0.160347	-0.0384211	0	0.173595	0.544658	0
rarA	-1.14402	-0.764644	0.184624	0.516276	-0.82359	0.455778	0.225304	0.544483	-0.692467	0.387016	0.408381	-0.182666	0.239758
yicN	-0.247906	0.544441	0	0	0	0.16682	0.0436977	0.0444802	0.417327	0.443464	0.061665	0	-0.00671575
lysV	0	0	0.0994506	0	0	-0.0604629	0	0	-0.292469	0.247468	0	0.000151657	0.543839
pulK	-0.113013	-0.200634	0.00080852	0.166732	0.140168	0.543603	0.0605901	-0.096172	0.353259	0	0.273452	0.215264	-0.221309
glcF	0	-0.119198	0	0	0.149648	0.0757865	-0.254824	-0.190056	0.543343	0	-0.242615	-0.216346	0.030878
rpmE	-0.242603	0.0623994	-0.142942	0.0758369	0	0	-0.0515052	-0.170132	0.543128	0.362471	0.127769	0	-0.306525
hemE	0	0	0	0.00320013	0.212402	0	0.518476	0.244622	0.298319	0.542633	0.0163511	0.417969	0
rcsF	-0.544052	-1.09321	0.351435	0.1978	0	0.223878	0.542288	0.250382	0	-0.0788867	-0.297798	-0.287858	0.301506
ytfH	-0.240149	-0.163932	-0.0542175	0.112793	-0.206158	0.541796	0	0.0319995	-0.282443	0	-0.0131393	0	-0.148101
bfr	-0.0604078	0.102999	-0.0726178	0	-0.169894	-0.214159	0.0387558	0	0.541653	0	0	0	0
flgE	-0.119174	0	0	0	0	0.54142	0.226618	0.163749	-0.130999	0	0.424988	0.155883	0
nupG	-0.294776	-0.621867	-0.690961	-0.157561	-1.09259	-0.229018	0.539838	0.0342196	-0.494725	-0.212342	-0.704321	-1.1318	-0.184079
qor	-0.362557	0	-0.167851	0.117949	-0.330759	0	0.338457	0.539477	0	-0.18741	-0.379194	-0.768385	0
uxuB	0	0	0.0979732	-0.291139	0.0380516	0.0350468	0	0	0.250956	0.104161	0.539216	0	0
nuoJ	0	0.424925	0	0.0558547	0	0.0586866	0	0.277069	0.538873	0	0.322681	0	0
kdpF	0	0	0	0.075117	0	0.0488637	-0.0440975	0	-0.747888	-0.000942144	0	0.239345	0.538633
glpA	0.250804	0.217218	-0.498502	0.11318	0.0994304	-0.0588609	0.509843	-0.0738129	-0.295708	-0.697457	-0.854389	0.538565	-0.0288937
ppdA	-0.198006	0	0.0630916	0	-0.00857582	0	0.300496	-0.170974	0.0580443	0.538458	0.0822899	0.221088	0.237931
ybeX	-0.508625	0.265179	-0.207167	0.253738	-0.259002	0.178912	0.527576	0.284611	0.381006	0.5384	-0.550662	-0.252638	0.369731
rpsO	-0.745771	0	-0.493585	0.136819	-0.117735	0.538349	0.226719	0.00414901	0	0	-0.452014	-0.303133	-0.0198401
rpsG	0.323906	0.141408	-0.0124359	-0.51625	0	-0.137969	-0.494113	0	0	-0.309189	-0.0248232	0.538074	-0.0176688
cobU	-0.0762992	0.337934	0.0360902	0.361612	0.0337016	0.339262	0.53746	-0.215489	0.0907706	0.281311	0.433309	0	0
mtfA	0	0	-0.310985	0.0894753	0.17954	-0.406687	-0.379616	0	0.132547	0	0.537344	0.208896	-0.59816
ydbD	-0.752245	0.0193657	-0.230461	-0.314054	-0.5219	-0.244217	-0.208063	-0.568164	0.536936	-0.0415679	-0.645537	-0.174859	-0.305335
hipA	-0.0955919	0.536881	-0.27589	0	-0.12782	0.251195	0.145171	-0.156954	0	-0.236554	0	0	0
macA	0.0253246	0.414907	0.412286	0	-0.278282	0.536603	0.426677	0.132994	-0.0750478	-0.55387	0.140817	-0.0965386	0
ygjR	0.0946653	0	0	0.0318784	0	0.100695	0.536407	0.480523	0.123261	0	0	0	0
yecM	0	0	0	0.0701406	-0.154788	-0.219628	-0.127333	0	-0.396695	0.534981	0	0	-0.0106175
yzfA	-0.187605	-0.467621	0	0	0	-0.256261	0	-0.616927	0.534622	-0.628579	-0.633086	0	0
rplS	-0.31721	-1.05243	-0.321194	0.0907116	-0.49353	0.534328	0.0740835	0	-0.309846	0	-0.453322	0	0
cpxA	0.534297	0.30785	-0.0899181	0.0715869	0.141229	-0.179378	0.349085	0	-0.108962	-0.0272621	-0.212802	-0.193878	0.101087
yicJ	0	-0.006057	0	-0.0139177	-0.0905621	0.329387	-0.00263085	0	0.533862	0.156229	0	-0.160491	0.139821
ybl158	-0.189897	-0.326155	0.0817205	-0.496083	0	-0.0112429	0	-0.0222351	0.53371	-0.686784	0	0.366525	-0.456429
ycaN	-0.139072	0	-0.0848559	0.0827317	-0.339409	0	0.532745	0.215405	-0.537366	0.454154	0	-0.423466	0.0777358
ydiP	0.0623934	0	0	0.0858097	0.00659733	-0.115722	0.308774	0.465195	-0.25361	0	0.295178	0.532077	0.343385
fepD	0.0489827	-0.544478	0	0.281187	0.516155	0	0	0.00160621	0.194714	0.531934	0.00452508	0.124116	0
proA	-0.674002	-0.968061	-0.0476237	0.0186138	-0.393618	-0.246302	0.420705	-0.0649163	0	0	-0.345283	-0.246933	0.531917
ybcI	0	0.128346	0.0159277	0	0	0.0184144	0	0.146705	0.11188	0.531314	0.232772	0	-0.306702
ybl125	-0.0191049	0	-0.141556	0.531307	-0.105044	0	-0.0448817	0	-0.180333	-0.185598	0.130129	-0.258206	0
yecR	-0.109461	0	0	0	-0.138905	0	0	0	-0.362694	0	0	0	0.531221
ldrB	0.445361	0	0.0296978	0.295991	0.0588391	0	0	0.127984	0.530999	0	0	0.497969	0
ybl114	-0.0706371	-0.50937	-0.101229	0	0.240812	-0.149578	-0.210287	-0.486586	0	0	0.0502075	0.530717	-0.134608
ubiE	-0.17301	-0.163176	0.0102815	-0.302433	0	0	0.471583	0.0870698	0	0.530473	0	0	0.314536
hokB	-0.246281	0	-0.0230744	-0.198105	0	-0.0650209	0	0.530471	-0.457416	0	-0.0738583	-0.627846	-0.197776
cysP	-0.364579	-0.382645	-0.00291679	0.279802	-4.70042e-05	0	0.529697	0.197666	0	0.0773673	0.24939	0.522914	0.392478
ybl105	-0.262423	0.242912	0.135541	0.456658	-0.176278	0	0	0.0736795	0.0662997	0.529578	-0.231284	0	0
nfsA	-0.637788	0	-0.209464	0.133667	0	0.0258878	0.361986	0.140858	-0.0318656	0.52933	0	0.0248899	-0.0250011
sbmC	-0.124393	0.158423	0	0.0826784	-0.0280757	0.356918	-0.178947	0.529273	-0.00704346	0.439439	0	-0.165387	0
ygdG	-0.257202	0	-0.0507592	-0.377807	-0.264813	-0.0371545	-0.0374672	-0.455126	0.529271	-0.120939	0	-0.405761	-0.277097
cysK	-1.36079	0.0606178	-0.490649	0.16205	-0.0691993	-0.186896	0.458623	0.0371938	-1.31536	-0.182965	0.0600053	-0.280232	0.528741
metG	-0.503182	0.227254	-0.50114	-0.113821	-0.697755	0.0988347	0.0256984	0.52821	-0.518133	-0.348874	-0.886813	-0.0101838	0.0740469
yeeO	-1.75089	-2.08102	0.103656	0	-0.0839041	-0.252739	0	0.180602	0	0.092664	0.527729	-0.222542	-0.543104
sucD	-0.722093	0.178028	0	0.195713	0	0.272814	0.527522	0.177851	-0.449319	0.00815707	0.135824	0	0
yfiQ	0.132891	-0.368348	-0.0876037	0.358082	-0.910702	0.52718	-0.131261	-0.260453	-1.37582	-0.268732	-0.417021	-1.55927	-0.13049
flhE	0	0	0	0	0	0	0	-0.182611	0.146743	0.526797	0	0.180466	-0.136413
metK	-0.264705	-0.0825367	-0.0389254	0.326927	-0.293323	0.467798	0.147229	0.0151166	-0.232912	0.462926	0.526351	0	0
yjhX	-0.106615	0.0360228	0	0	0	0	0	0	0.234233	0.407351	0.526268	0.11846	0.0780245
yheO	0	0	-0.00435544	-0.111163	0	0	0.20915	0	0	0	0.525496	-0.425388	0
edd	-0.481163	-0.695842	0	0.259051	-0.359488	0.3051	0.428288	0.524378	0.225163	0	0.431405	0.0676305	-0.108728
yqfA	-0.21625	-0.0900237	0.405772	0	0	0.0774394	0.0574053	0	0.450301	0.47851	0.524355	0.267154	0.0537356
yjfY	-0.0052888	0	-0.162074	0	-0.0972196	0	0	0	0.52331	0	0	0	0
uspA	0.37665	0	0	0	0	0	0.257841	0	0.0888076	0.267593	0	0	0.523107
lrp	-0.724941	-0.319846	0	-0.0851693	0	0.179575	0.292174	0.523	0	0.453921	-0.138991	-0.0456188	-0.161687
scpC	-0.299902	0	0	-0.0235371	-0.424977	0.289629	0.522989	0.287256	0.204666	-0.0260809	-0.0607219	-0.666505	-0.0772779
ybiI	0.0386637	0.370344	0.0463949	0.0088911	0	0	0	0	0	0	0.109083	0	0.522784
abgA	0	-0.621035	-0.112592	0.124958	-0.26031	-0.292584	-0.0570343	0.522653	0	-0.729848	-0.415897	-0.422479	-0.575529
ykgF	-0.394657	-0.433227	-0.478709	-0.0368381	-0.489362	-0.110334	-0.0225654	-0.0152799	0	-0.836769	-0.18592	0.364144	0.522102
narU	0.305515	0.52189	0.072102	-0.118856	0	0.00199992	0	0	0.371146	-0.152277	-0.202592	-0.141368	0
dam	-0.0856709	-0.00458486	-0.112188	0.280168	0	0.231471	0.521453	0.36128	0.0818128	0.13579	-0.051228	0	0.212863
mlaF	-0.155553	-0.0509194	0.0705083	0.0743532	0	0	0.285602	0	0.0303338	0	0.521287	0.218335	0.405554
waaA	-0.419673	0	-0.0638644	0.153545	-0.129554	0.231086	0.521173	0.0584885	0.520278	0	0.0656597	0.134764	0
leuB	0.165005	0.157355	0.025754	-0.225319	-0.024352	0.188777	0.0246432	-0.0356651	0.521002	0.293525	-0.0196009	0	0.0806437
btuD	0.259713	0.200576	-0.0483941	0.520744	-0.251016	0	0.171356	0.2242	0	0.0186488	0.0426462	-0.00443983	0.0101922
galM	-0.270011	0	-0.0568131	0.233573	0	0	0.520235	0	-0.369374	0	0	0	0
rplE	0.0489219	-1.25815	-0.174957	-1.80881	0	-0.263609	-1.50182	-0.712718	-1.89142	-0.83428	-0.253286	0.519943	-0.317858
fimZ	-0.101392	0	-0.087662	-0.149639	-0.221762	-0.043392	0	0	0.0169693	0	-0.00735943	0.519297	0
spoT	-0.475992	0.092297	0.109355	-0.448091	-0.0710646	0.5184	0	-0.0896515	0.37705	-0.24359	0.0875462	-0.0376971	0.178524
setB	-0.0142305	0	-0.168043	0.342339	-0.21282	0.291453	0.142165	0.518249	0	-0.4369	0	-0.678697	-0.0842531
yadL	-0.480793	0	0	0	0.126685	0.119077	0	0.392864	-0.617279	0.332441	0.517935	0.0569842	0.430846
yidG	-0.124197	0	0	-0.0168591	0	0	0.0600309	0.116861	0.517348	0	0	0	0
yeaM	0	0.260175	0.0132471	0.0519669	0	0	0.0442276	0.0173146	0.313911	0	0.517278	0.303444	0.392679
ybl72	0	0.516605	0.0100482	0	0	0.100377	0	-0.403737	-0.715004	0	-0.0814036	0	0.124165
araF	-0.074379	-0.378012	-0.029027	-0.0311141	-0.152842	0.0666903	0.371929	0.117322	0.158906	0.010912	0	0.196497	0.515926
gfcE	-0.106068	0.128751	-0.048628	0.0819605	-0.525868	0	0.273474	0.0668464	-0.751551	0	0.0153414	0.126446	0.515634
metR	-0.460774	-0.1449	0	0.0369269	0	0	0.264434	0.515567	-0.477521	0.188931	0	0.224179	-0.065709
fecE	-0.304771	0.38972	0.0361036	0.166681	0	0	0	0	0.515543	0.15181	0.305496	0	0.308885
proL	-0.510556	-0.565116	-0.157579	0	0	0	0.51554	0	-0.0560277	-0.182884	-0.0358748	0	0.18061
yhdX	-0.329584	-0.352939	-0.0794351	0	-0.513132	0	0.196187	-0.14374	-0.0561222	0.515491	-0.0755961	-0.132592	-0.150127
yqeG	-0.192245	-0.381563	-0.365318	0.317454	-0.278463	0.515262	0.447049	-0.250634	0.0575749	0	-0.288033	-0.180459	0.172388
yadC	-0.416876	-0.560943	0	-0.0146602	0.514924	-0.0502842	-0.0718921	-0.0963346	-0.0958542	0.390232	0.464485	0.199809	0
ptsH	0	0.0759636	-0.236991	0.48827	-1.09113	0.230484	0.193492	0.514809	-0.0050139	-0.0646436	0	-0.200582	0
yegV	-0.697382	0.217876	0	0.10677	0	0.00845367	0.140909	0	0	0.514783	-0.335337	-0.265103	-0.197412
ybl210	0.0661599	0	0	0.285141	0	0.339271	0.514395	0	0.472666	0.451995	0.199759	0.419894	0.299348
ybl229	0.182598	0	0.03236	0.0654384	0.491578	0.218539	0	0.0688944	0.0429513	0.513857	0.226343	0.322389	0
creB	-0.225481	-0.215346	0.00644266	0.51344	-0.205434	-0.041952	0.147386	-0.145092	0.0172771	-0.479364	-0.33295	-0.422001	0
yfcV	0.0101188	-0.562209	-0.164693	-0.102022	0	-0.11876	-0.181013	0.06977	0	-0.45989	0.00155414	0.513376	0.50072
ybhF	-0.529065	0	0.192578	0.28623	0	0.0230974	-0.0788405	0.132449	0.513292	0.0581444	0.100399	0.252488	-0.466088
thiG	-0.311017	0.0896343	0.245073	0	0	0.332766	0	0.330413	0.140642	0.513258	0.282211	0.395996	0.0728538
setA	-0.576243	0.173951	0.032006	0.0297221	-0.249449	0.15153	0.0799588	0.0699742	0.513177	0.281003	0.221155	0.222993	0.0820151
argX	0.512183	0.0464424	-0.203755	0	0	0	0.0754561	0	0	-0.202825	0	0.444702	-0.135235
proC	0	-0.260914	-0.0410061	0.512159	0	0	0	0	0	0	-0.125516	0	-0.350344
rbsB	-0.0574247	0	-0.0745872	-0.206312	0.06681	0.0754814	-0.114446	0	0.347375	0.512073	0	0.224268	0
icd	0	0.034144	-0.128184	0	0	0.510897	0.212984	0	0	-0.124447	-0.0287546	0	0
ybfB	-0.0348463	0	0	0	0.389655	-0.17304	0	0	0.510229	-0.112716	-0.124065	0	-0.307065
recF	-0.213861	-0.29176	0	0.385445	-0.112929	-0.218991	0	-0.112578	0.509553	-0.380805	-0.320892	-0.735022	0.0285937
rhsA	-0.0178424	0	-0.0749925	0.41939	0	0	-0.369428	0	0	0.247942	0	0.509156	0
yjcS	0	0.407646	0.317798	0	0.267134	0.50915	0.0609084	-0.251995	-0.577475	0.264225	0.160574	0.282677	0.254563
aspC	-0.679901	-0.0180981	0	-0.298803	-0.100179	-0.062445	-0.386447	-0.160864	-0.242022	0.509086	0.0573815	0.0536579	0.11378
metQ	0	0	0.096329	0.117844	0	0.235001	0.507906	0	0.371408	0.458976	-0.208122	0	0.146753
pnuC	-0.0961151	0	0.0414006	-0.0842834	0	0.0724351	0.037524	-0.0372931	0.506973	0.143642	0.0552503	0	-0.0532736
rpoN	0.307921	0.506948	0.0508904	0.185425	-0.418486	0.291875	0.137879	0.152363	-0.0496549	0.473346	0	-0.787133	-0.0231632
ydjO	0	0.0507808	0	0	0.141486	0	0.196601	0.0809174	-0.245983	0	0	0.506854	0
ruvC	0	0	0	0	0	0.0763854	0.287632	0	0.506689	0	-0.346026	0.00738669	0
yceG	-0.149356	-0.0399066	0.506023	0	0.0278058	0	0.022694	0.368981	0.0949438	0	0	0	0
phoU	-0.185119	-0.0656278	0.0686294	0.505591	0	0.0184824	0	-0.183027	-0.16506	0.0371501	-0.162882	0.29161	0
mrdA	0.0767363	0	0	0	-0.402373	-0.464781	0.119333	-0.0691418	-0.186466	0	0.505269	0	-0.00487358
ugpE	0.284766	0.403066	0	0.5048	0	0	0.142815	0.133102	0.0198606	0	0.113576	0.112091	0.265258
hofP	0	0	0.0127104	0	0.30007	0.216766	0.0489813	0	0	0.504378	0.259515	0.314192	0
ydbC_2	-0.106518	-0.399518	-0.120569	-0.761415	-0.0642305	-0.083059	-0.305229	-0.512847	0.504017	-0.373351	-0.48239	-0.331334	-0.102763
phnG	0.0738241	0.0400134	0	-0.167391	0.361095	0.169002	0	0.0881051	0.0235002	0.503674	0	0	0.0150469
entE	-0.798792	-1.03761	-0.0694404	0.503352	-0.11862	0.0727908	0	0	-0.663516	0	-0.07233	-0.589635	0.015127
hemY	-0.414719	0	-0.172138	0.344928	-0.610492	0.326146	0.295576	0.449279	0.337964	0	-0.494355	0.50329	0.00426222
ucpA	-0.0227775	0	-0.0576948	-0.0985841	-0.23448	-0.0445564	0	0	0.502823	0	0.219599	0	0.0585072
yfcE	-0.588951	0	-0.0802544	-0.27673	-0.175704	-0.758954	-0.212558	0.0320941	0.502804	0.0309679	0	-0.402427	-0.0882045
ygaY	0	0.0397782	0.00734832	0	0	0.00860175	-0.0616418	0	0	0.502489	0	0	0
yceO	0	0	0	0	-0.115352	0.0278248	0	-0.000659325	0.502071	0	0	0	0
pflB	-0.408419	-1.07661	-0.770678	0.501412	-0.643728	-0.266823	0	-0.223838	-1.29291	-0.628066	-0.821048	0.305541	-0.10567
aec37	-1.07448	0.277545	-0.331001	0.119113	-0.227555	-0.308854	0.501406	0	-0.61406	-0.516364	-0.346697	-0.0963758	0.267022
marR	-0.420811	-0.577237	-0.0738815	-0.170801	0	0	0.501276	0	0	0	0	0	0
ycfP	-0.9013	0.403758	0	0.0662521	0	0.0431724	0.202112	0.0904754	-0.224297	0	0	0.501272	-0.298229
yqhG	-0.148761	-0.521762	0.100747	-0.45381	0	0.301466	0	0	0.500731	0	-0.0881688	0	-0.159953
rpoZ	-0.0365687	-0.282106	-0.0160026	0	-0.36823	0	0.0120828	-0.0469221	0.50046	0	0	0	-0.0781606
ybiH	0	-0.218579	0.0426567	0	-0.00188179	-0.281791	0	0.113769	0.500137	0.489862	0	0.0780705	-0.168938
cybB	-0.161266	0	0	0.130806	-0.868655	0.499995	0.107957	-0.0108564	-0.861295	-0.2869	0	-0.487935	0.431204
yccX	0	-0.255232	0	0	0.253965	-0.192378	0.367491	0	0.183968	0.430454	0.498935	0.280501	0
[truncated: 2,425 more rows]

## Sheet: Solid Plate asays
gene_name	IT034_NoPhageControl	IT022_T2_phage_9.6875_MOI	IT023_T3_phage_3.4375_MOI	IT024_T4_phage_221.875_MOI	IT025_T5_phage_625_MOI	IT026_T6_phage_62.5_MOI	IT027_T7_phage_31.25_MOI	IT028_P1_phage_9.375_MOI	IT029_P2_phage_0.5625_MOI	IT030_lambda1857_phage_12.5_MOI	IT031_CEV1_phage_0.3125_MOI	IT032_CEV2_phage_84.375_MOI	IT033_LZ4_phage_4.6875_MOI
dgsA	-0.185809	0.713002	0.891818	0.650145	1.26561	0.420568	0.713227	0.650145	0	11.3839	0.148434	5.58901	2.33946
nirB	0.287324	10.9301	-1.27501	-1.1774	-1.31895	-1.20462	-1.20462	-1.1774	0.353726	0	-1.88624	-1.4116	0.270489
dnaK	-0.681015	1.09444	0.996833	1.09444	0.95289	1.06722	1.06722	1.09444	-1.4646	8.77511	-0.254563	3.23273	0.710529
rnb	-0.602329	-2.35393	-2.45154	8.44778	-2.49548	-2.38115	-2.38115	-2.35393	-0.047239	-3.28804	0.961241	-2.73785	-2.73785
ydfI	-0.351087	-0.596463	-0.121488	-0.365608	0.21081	0	-0.12465	-0.510043	0.136581	8.0957	-0.15727	3.74156	1.32351
yedW	1.03182	-0.280901	-0.378512	-0.280901	-0.422455	-0.308122	-0.308122	-0.280901	0.0680184	5.03291	-0.107086	0.920147	7.70587
yfeC	-0.0909381	0	0	0	0	2.48189	0	0	0	0	0.416401	0	7.02112
rppH	-3.84706	0.332076	0.234465	0.332076	0.190522	0.304855	0.304855	0.332076	-0.212089	-0.602036	-0.996609	4.19609	6.53312
hupA	-0.358204	-0.0739217	-0.16798	0	-0.092049	-0.0811464	-0.100152	0	0	6.33033	-1.1167	3.11342	0.263084
glk	0	0.0429484	0	0.0430691	0	0.0340645	0	0.0428309	0	6.24448	0.139471	1.68228	2.07193
cpdA	-0.482689	0.115601	0	1.26309	0.554135	0	0.102752	0.115601	-0.515685	6.12044	1.0917	2.0437	0
yciT	0	0	0	0	0	0	0	0	0.126705	5.83137	0	1.22277	0.825873
infB	0.553023	0.598766	0.501155	0.598766	0.457212	5.41128	1.07154	0.598766	-1.46027	0.457135	-2.5224	1.87581	0.214851
malY	-0.206096	-0.0362249	0.125384	-0.0362249	-0.111112	0.61277	0.156528	-0.0362249	-0.138973	5.33546	-0.223475	0.935807	-0.42014
ftsH	-0.272133	0.811873	0.75632	0.822401	0.768722	0.799646	0.800194	0.799774	0.822818	1.39001	-0.905369	0.536526	5.22294
serV	-1.04225	-0.452429	-0.551178	-0.452429	-0.574196	-0.514307	-0.514307	-0.452429	0	-1.20228	0	-0.514655	4.97907
galF	-1.35079	0.666731	0.634985	1.30327	0.456355	0.643105	0.638652	0.666731	-0.581612	4.83906	-1.54371	1.58471	1.14914
ybl35	-0.170635	0.495546	0.592168	0.980899	4.62537	1.24001	1.36947	0.668156	-0.720909	-0.104673	-0.383416	2.66441	0.948029
ffh	0.21506	-1.90958	-2.0072	-1.90958	1.94886	-1.93681	-1.93681	-1.90958	0.353605	-0.521769	0.26423	-1.2935	4.61339
ybl54	-0.121054	0	0	0	0	4.57341	0	0	0	0	0	0	0
ygiQ	0.302398	0.686473	0.607901	0.705512	0.563958	1.06528	0.67829	0.705512	-0.32561	4.55946	-1.46234	0.437686	0.24169
gadX	0.192818	0	0	0	0.0110095	0	0	0	-0.427817	4.50657	0	1.11093	0
rnr	-0.226841	-0.726139	-0.823749	-0.726139	-0.867693	-0.75336	-0.75336	-0.726139	0.139245	1.18673	-0.832432	-1.11005	4.50361
mreB	-0.23015	1.6565	2.55889	1.6565	1.51495	1.62928	1.62928	1.6565	-1.69502	0.722392	-1.46466	1.27259	4.46875
nuoG	0.952278	0.883486	0.785875	0.883486	0.741932	0.856265	0.856265	0.883486	0.853894	4.1973	2.61369	0.499571	0.499571
macB	2.94486	0.0182645	0	0.0182645	0	0.0114591	0.0114591	0.0182645	3.71018	4.16767	-0.443957	1.16062	-0.181607
yciQ_2	-0.233071	-0.432067	-0.523173	-0.432067	-0.314734	-0.459289	-0.459289	-0.432067	-0.206511	-1.00763	0	0.367597	4.09638
mrcB	-0.111967	0.534124	0.436514	0.534124	0.39257	0.506903	0.506903	0.534124	1.15825	-0.399988	-1.58704	0.650209	4.08539
fdnG	-0.851737	-0.0762787	-0.17389	-0.0762787	-0.217833	-0.1035	-0.1035	-0.0762787	1.43637	1.70274	-0.276794	0.0398063	4.05376
ydfH	0.729275	-1.26119	-0.317733	-1.27656	-0.492844	-1.26997	-1.24557	-1.29822	-0.310493	0	0.120315	-1.73521	4.04167
ybaB	-0.749275	0.279899	0.303503	0.282563	0.60126	0.268466	0.29708	0.280648	-0.0767487	3.96408	-0.954297	0.610855	0.0789537
mdtB	1.33077	-0.297452	-1.39506	-1.29745	-1.43901	-1.32467	-1.32467	-1.29745	1.89019	3.93836	2.28875	1.48856	-1.68137
malK	-0.0192801	0.341496	1.09334	0.341576	0.574859	0.30041	0.452647	0.341576	-0.31875	3.87508	-0.221986	1.28687	0.59799
ydfR	0	0	0	0	0	0	0	0	0.117786	3.70516	0	1.9317	0
lpxD	0	-0.278665	0.461153	-0.278665	0.133751	-0.305887	0	-0.278665	0	-0.536138	0	-0.329247	3.69235
argG	0	1.32621	1.64058	3.68789	1.77754	1.87846	1.99331	3.40326	-1.10316	0.368246	-0.962393	1.64459	2.75959
malE	-0.128915	0.102503	0	0.11564	0.0828533	0	0.117581	0.11564	0.440773	3.67387	-0.0851595	1.67051	1.1196
metG	-0.503182	0.801381	0.70377	3.6643	0.659827	0.77416	0.77416	0.801381	-1.53478	0.467269	-2.91227	0.734459	3.11423
malP	-0.0686845	0.779365	0.681754	0.779365	0.63781	0.752143	0.752143	0.779365	1.65873	3.65435	-0.789824	1.64034	0.538307
yneF	-0.456476	0.272638	0.0880414	0.504318	0.455667	0.882948	0.188322	0.52915	0.458317	0.959867	0.0712872	0	3.62525
acrD	-0.361425	-0.16968	0.594363	3.60033	-0.311235	-0.196902	-0.196902	-0.16968	0.647899	0.814503	-0.427586	-0.553595	0.954259
hupB	-0.432873	0.832974	-3.17153	-3.07392	-0.893542	-3.10114	-2.10114	-3.07392	-0.265565	3.59188	1.12096	-1.45783	-3.45783
bcsA	-1.39471	0.330979	0.173631	0.27967	0.189424	0.286018	0.303757	0.330979	0.726734	1.03031	1.39397	-0.0529363	3.58043
ydhQ	0.235243	-0.519296	-0.616907	-0.519296	-0.66085	-0.546517	-0.346517	-0.519296	2.25873	3.56452	0.746902	0.678167	0.613782
gatY	0.00921156	0.705334	0.728281	0.808571	0.880434	0.820105	0.299809	0.839275	-0.222231	3.55891	-0.637644	0.930627	0.735748
asnB	-0.84948	3.4883	0.475203	0.560729	0.859994	0.549936	0.7439	0.557811	0.628165	2.03308	-0.585585	0.957196	0.452002
nagE	0.0101586	-2.28644	-0.799087	-2.28644	-0.843031	-2.31366	-2.31366	-2.28644	0	-3.22055	1.1128	0	3.47526
metH	0.48598	0.141554	0.0439433	0.141554	0	3.43626	0.114333	0.141554	0.597389	0.792405	2.71976	-0.242361	0.757639
yhfW	-0.157266	-0.00276511	0.0951049	-0.0543289	0	-0.0771114	-0.0139277	-0.036504	0.50458	3.41817	-0.364816	0.502625	0
yjiY	0.19496	-0.266159	-0.367371	-0.266159	1.58869	-0.296982	-0.294398	-0.266159	1.15713	2.11026	3.02605	-0.653675	3.408
pbpC	1.73759	-0.0754658	1.02191	-0.0754658	0.311301	-0.102687	-0.102687	-0.0754658	1.70621	3.38703	0.81881	1.26393	2.50353
msbA	-0.440831	0.848062	0.750452	0.848062	0.706508	0.820841	0.820841	0.848062	0.740156	0.895328	-0.927586	0.664147	3.38524
pgaA	-0.213531	-0.0350994	0.11729	-0.0350994	-0.176654	-0.0623209	-0.0623209	-0.0350994	-0.444884	-0.969211	-0.173952	-0.169014	3.37983
ygfX	0	0	0	0	-9.11134e-05	0	0	0	0	3.37496	-0.697961	0	0
rep	-0.643076	0.0105946	0	0.100733	0.102036	0.0735114	0.0735114	0.100733	0.744034	3.36097	0.325665	1.32536	1.06738
ibpA	0	0	0	0	0.0659244	0	0	0	0.329999	3.35786	0	0.12005	0
typA	-1.10581	0.805862	0.713813	0.805862	0.653842	0.782952	0.782952	0.79774	0.213224	1.24462	0.0772193	0.295296	3.32041
csiE	-0.275785	0.101104	0	0.101104	0	0.0154485	0.193548	0.101104	0.484534	3.3109	-0.432792	0.84079	-0.257835
pdhR	0.00810418	0.807493	0.719006	0.769998	0.635912	0.760438	0.733222	0.769998	0.312323	3.30635	-1.80943	0.840896	0.207185
recC	1.3222	0.928841	0.675602	0.329353	0.787287	0.901619	0.901619	0.928841	1.07905	3.2936	-1.82384	1.16687	0
atpD	0	0.0513754	0.0258084	0.00592086	0.0562032	0.00879132	-0.0200917	0.229793	0.602123	3.29142	-0.0709339	1.34312	0.163832
insJK-1_1	0.400291	-0.357295	-0.454906	-0.357295	-0.498849	-0.384516	-0.384516	-0.357295	0.456083	0	0	-0.24121	3.26712
secA	0.369435	0.400013	0.371148	0.38908	0.752868	0.30778	0.367823	0.38908	0.757659	0.853737	-0.833145	0.408917	3.19402
hslU	0	-0.173076	0.0922398	-0.173076	-0.31463	-0.200297	-0.200297	-0.173076	0.557669	3.19021	-0.976513	0.423834	0
purR	-0.975407	1.84262	0.477679	0.290613	0.455832	0.517635	0.464838	0.425774	-1.12886	1.61464	-0.457124	0.300178	3.18211
htrE	0.0946625	0.500197	0.429804	0.500197	0.426343	0.485995	0.485995	0.500197	-0.633211	0.572431	3.17983	0.212937	0
kdpD	-0.366155	3.17468	0.912727	1.09302	1.13226	1.0658	1.02863	1.09302	1.41646	1.58032	-1.8957	2.65797	2.73099
lpd	-0.861877	0.48063	0.383019	0.48063	0.278767	0.409407	0.703408	0.48063	-1.51015	2.34151	0	1.21608	3.16466
rplU	0.721029	1.3152	1.21759	1.3152	1.17365	1.28798	1.21352	1.3152	-0.71439	0.38109	3.15644	0.931287	0.805063
dos	0	0.945642	0.624373	0.945642	0.818846	0.752151	0.926792	0.929453	0.523585	0.985911	-0.754987	0.421132	3.1557
pstB	-0.561126	0.302642	0.408605	0.34306	0.226246	0.327087	0.323574	0.34306	0	3.15114	-0.217562	0.837313	0.47284
acnA	0.681436	-0.855225	-1.01378	1.52947	-0.804779	-0.875819	-0.875819	-0.892611	1.35191	3.13611	-0.143774	0.858289	-1.33787
rhoL	-0.281037	0.315004	0.364219	0.288808	0.173929	0.308556	0.316202	0.269048	0	3.13579	0	0	0.0465461
yfdZ	0.111808	0.464718	0.906343	0.435317	0.306272	0.408531	0.405631	0.468271	0.525864	3.13423	-1.41303	1.2029	1.30201
gatZ	-0.107946	0	0	0	0	0	1.2293	0	0.0446508	3.13308	0	0.557293	-0.107776
ybl34	-0.0659132	0.0142375	0	0.175771	3.12015	0.334654	0.733104	0	0	0	-0.615327	1.43979	0.397925
aes	-0.585976	0.326848	0.0664383	0.171988	0.226756	0.171854	0.19533	0.210341	0.300324	3.11371	0	1.36418	0.623017
yhbX	0	0	0.0683769	1.38029	0.50837	0.247972	0.319842	3.10534	0.1678	0.327524	-0.0172061	1.2961	0
kup	0.179029	0.264878	0.598095	0.264878	0.0949705	2.5733	0.872216	0.431545	1.82592	3.09028	-1.40156	1.45339	1.18193
gyrA	-3.19256	0.986579	0.888969	0.986579	0.845025	0.959358	0.959358	0.986579	0.442414	3.05247	-2.92707	0.602665	0.602665
gapA	0.285517	-0.620841	-0.732727	-0.620841	-0.745659	3.01391	-0.686533	-0.659311	-0.603489	-1.59342	-1.64397	0	-1.04323
eutA	-0.922609	0.477891	0.337339	0.39147	0.442284	0.341334	0.328299	0.478993	1.70118	3.00062	-0.799098	0.258736	0.237421
mrdA	0.0767363	-0.660105	0	-0.750045	-0.180654	-0.675865	-0.675865	-0.712736	0.53885	0.0609804	0	-0.461319	2.99865
yhhX	-0.227026	0.144822	0.417287	0.146458	0.00160222	0.223566	0.38205	0.191655	0	-0.200075	0	-0.0592568	2.99302
erpA	-0.104179	0.56696	0.50619	0.566416	0.295971	0.539546	0.587089	0.565936	-0.0450335	2.98514	0	0.863967	1.53051
plsB	-0.506388	-0.255064	-0.352675	-0.255064	-0.396618	-0.282286	-0.282286	-0.255064	-1.14661	-0.797926	-1.95335	0	2.97613
dtpB	0	0.585728	0.571428	0.58684	0.555942	0.531073	0.537168	0.58684	0.24914	2.97375	-1.18643	0.795841	0.970595
hypF	-0.63767	-0.084314	-0.11902	0	0.33527	-0.011085	-0.0786151	-0.037439	1.3636	2.97347	-1.3106	0.563358	-0.303332
mngA	-0.521346	0.656851	0.55924	0.656851	1.04362	0.62963	0.62963	0.656851	-1.0024	0.389406	0.773902	0.272936	2.96699
fadD	-0.15238	0.631158	0.518512	0.631158	0.558812	1.11521	0.60169	0.631158	-0.250821	2.94923	-1.92873	0.567027	0.970716
nadK	0.293115	0	0	0	0.0390931	0.0265568	0	0	0.107232	1.94555	0	1.21092	2.90275
yihG	-0.191367	1.62057	1.55889	1.62057	1.50602	1.00901	1.62928	1.54357	0.304984	0.722392	0.512985	1.77259	2.89443
ydiJ	-0.179348	-2.21922	-0.731866	-2.21922	-1.86077	-2.24644	-2.24644	-2.21922	-0.75606	2.87142	1.20995	-0.752913	2.19868
tktA	-0.954686	0.545736	1.16845	0.545736	0.404181	0.22101	0.851847	0.545736	-0.721407	-0.160273	-1.57039	0.328487	2.87034
serT	-2.11211	0.732715	0.731845	0.731845	0.731845	0	0.638095	0.731845	-1.42966	1.00915	-0.455504	0.423187	2.86877
ptsA	0.332807	-0.0525841	0.380151	-0.0443436	0.202102	-0.064966	-0.064966	-0.0443436	0.319241	2.85339	1.63382	1.55093	-0.436499
trpD	0.605889	0	0.118313	0	0	0	0	0	1.69709	2.84114	0	1.23027	0.17968
dnaE	-0.245024	-0.873243	-0.970854	-0.873243	-1.0148	-0.900464	-0.900464	-0.873243	-0.317873	-1.80735	2.83516	-1.25716	-1.25716
pflD	-0.0652628	0.889204	0.806477	0.889204	0.667695	1.77853	0.83333	0.876704	1.99647	2.82765	-2.14791	0.875476	0.76631
ubiG	-0.0154997	0.451519	0.513908	0.514917	0.863659	0.487696	0.567696	0.451519	0.740797	2.82193	-1.1079	0.896431	0.383396
metR	-0.460774	0.103801	0.0485165	0.100456	0	0.0297578	0.079563	0.0854159	-0.0667347	2.81714	-1.24692	0.322092	1.14577
yoaB	0.644238	-0.30676	-0.10591	-0.30676	0	-0.140488	0.247444	-0.265094	1.95791	2.81341	0	0.754238	0.500414
yphG	-0.0226313	-1.1289	-1.22651	-1.1289	-0.270452	-1.15612	-1.15612	-1.1289	1.82336	2.02445	1.87632	2.18763	2.80912
bolA	0.825366	0	0.348191	0	0.629568	0.614655	0.614655	0.611104	0.389947	2.80735	1.31325	1.52319	0
treA	0.672589	-0.372994	0	-0.450607	-0.297148	-0.53697	-0.0771762	-0.439615	1.0671	2.80688	-0.466962	0.900863	0.75722
nuoC	-0.597048	0.358762	0.0245646	0.358762	0.00706692	0.323545	0.334415	0.358762	0	2.80508	-1.21323	1.67986	-0.00779534
frlA	0.431842	0.358828	0.382908	0.410791	0.254236	0.374402	0.0825721	0.394052	-0.276479	2.79599	0	0.581397	0.660491
aegA	-0.4153	0.371388	0.878637	-0.0646635	-0.106218	-0.091885	0.301981	-0.0646635	0.358504	2.78901	-1.27096	-0.0485785	1.50053
fadJ	-0.243616	-0.496447	-0.594058	-0.496447	0.111999	-0.523669	-0.0236686	-0.496447	0.989588	2.78471	1.00958	0.346361	-0.0878809
tldD	-0.795856	0.132537	0.0349265	0.180156	0.212196	0.200554	0.105316	0.132537	0.413745	2.76257	-1.20971	0.230799	0
ybl118	0.174852	-0.00774511	0.0618771	-0.00774511	0.775093	-0.0349666	-0.0349666	-0.00774511	0.913258	2.75533	-0.464461	1.12075	0.169967
arcB	-0.0273598	0.51354	2.75001	0.497201	2.10504	0.489876	0.463291	0.497113	0.504395	0.571144	-1.08715	0.274398	0
yccS	-0.537814	0.514431	0.210993	0.514431	0.622877	0.487209	0.487209	0.514431	0	0	0.61047	0.380516	2.72258
yhhJ	-0.305891	-0.0800828	-0.0403263	-0.0800828	0.179891	1.59634	0.224031	-0.0800828	0.540754	2.20963	0.276646	0.732962	2.71465
rpsG	0.323906	0	0	0	0	0	0	0	-0.324024	-0.652542	0	2.70501	-0.102345
ygbJ	0.306209	0	0.343061	0	0.360533	0	0.0193461	0	1.12683	2.70356	0.602702	0.900972	0
ravA	0.910829	-0.216717	-0.226275	-0.272273	0.085061	-0.299494	-0.188383	-0.272273	2.0787	2.70233	-0.917083	0.236169	0.647433
ybl161	-0.216856	0.270353	0	0.0808007	0.150809	0.0432804	0.0574314	0	-0.381024	2.6969	0.222924	0.372178	0.917258
uxaC	-1.18003	0.497028	0.895543	-0.144093	-0.174536	-0.171315	-0.171315	-0.144093	1.08292	2.68467	-1.5472	0.518171	1.44266
yhjB	-0.864826	0.870515	0.772904	0.870515	0.871818	2.59346	1.12901	0.870515	-0.750579	1.81782	0.349279	0.4866	2.68277
carA	-1.10002	0.746299	0.63543	0.746299	0.639549	0.728549	0.714403	0.593021	-0.0782713	2.67704	-0.774558	0.434057	0.907716
mukE	0.407791	0.535664	0.730167	0.535664	0.485019	0.508442	0.599352	0.535664	1.60732	2.66189	-1.31732	0.931196	0.766187
cspC	0.312598	0.146006	0.197189	0.146006	0.144717	0	0.627195	0.144717	1.21621	0	-0.827664	0	2.65996
ynjC	0.517462	-0.0874773	-0.189745	-0.0874773	0	-0.0941126	-0.0994671	-0.0874773	1.78636	2.65372	0.580684	0.538596	0
mgtA	-0.281822	0.0833262	-0.0142846	0.0833262	-0.0582279	0.0561048	0.0561048	0.0833262	0.441932	1.16688	-0.78659	0.147905	2.65286
metA	-0.129623	0.480277	0.256852	0.480277	0.369545	0.459976	0.459976	0.741979	0	1.12391	-0.122347	0.498472	2.63575
dxs	0.356023	0.331466	1.75062	0.329671	0.642136	0.230604	0.303888	0.331289	1.91115	2.62192	-2.64403	0.723393	0
bcsG	-0.287741	0.15176	0.0074668	0	0.318289	0.158077	0.0707882	0.15176	0	-0.0633152	-0.682447	0	2.61682
rem	0	2.58902	0.142559	0.281861	0.321085	0.277087	0.266218	0.281861	0	0	-0.0681089	0.948712	0.763256
ompX	0.0577365	0.866842	0.634764	0.700743	0.554078	2.54632	0.803523	0.700321	-0.0924561	0	0.357018	0.490635	2.58201
mhpR	0.446818	0.184599	0.352886	0.450497	0.508943	0.423276	0.423276	0.450497	1.11464	2.57485	-0.346936	0.783575	0
yjjN	0.305981	0.281395	0.153129	0.104641	-0.00810492	0.0305623	0.1438	0.0454788	0.770816	2.5546	-0.604387	0.493546	0.923559
fdrA	-0.598607	0.353739	0.337441	0.353027	0.456392	0.329542	0.329542	0.353027	1.01844	2.54683	-0.296644	0.910159	0.477093
mrcA	-1.5424	0.0850885	0.0169324	0.114543	-0.0270109	0.0873218	0.0873218	0.114543	0.0702557	-0.819569	-0.845659	-0.269372	2.54608
dsbG	0.0143803	0	0	0	0	0	0	0	-0.100982	-0.220703	-0.322385	-0.389224	2.54027
menH	0.464957	0	0	0	0.0728109	0	0	0	0.962326	2.53672	0	0.608137	0.35442
xseA	0.301371	-1.37747	0.109878	-1.37747	-1.51903	-1.4047	-1.4047	-1.37747	0.201743	-2.31159	2.53543	-1.76139	-1.76139
gntP	0.826218	1.30856	1.22642	1.30814	1.57345	2.21302	1.28547	1.30953	-0.279387	0.138723	-0.500457	0.905101	2.53381
yehU	-0.768253	0.0417353	0.329816	0.0417353	0.197864	0	0	0	0.264995	-0.305451	-0.817159	-0.283183	2.52916
cusA	-0.355207	0.654004	0.556393	0.654004	0.51245	0.626783	0.626783	0.654004	0.624412	2.52725	0.827819	0.270089	0.270089
ynfA	-0.390827	0.334531	0.282645	0.296383	0.170953	0.361015	0.29121	0.25947	0	2.49938	0	0.400991	0.221121
hybC	0.215453	0.288791	0	0.307154	0.133326	0.272414	0.383428	0.252074	0.00342846	2.48916	-1.04479	0	1.1699
ypaB	-0.0969781	0.110351	0.282499	0.0770178	0.154962	0.106877	0.102628	0.0770178	-0.0446213	2.48187	-0.879183	0.818653	0.747082
folD	0.357048	0.0211567	0	0	0	0	0.0564353	0.0211567	0.863327	2.4788	-0.565296	0.976171	0.89116
rseC	-0.458684	0.428593	0.360678	0.431679	0.268088	0.426093	0.551459	0.431679	0.303677	2.47685	-0.510193	1.41165	0.265115
ssnA	0	0.0645236	0	-0.234352	-0.266186	-0.222892	0	-0.234352	0.853926	2.47603	0.160549	0.537841	0.536386
rlmL	-1.89381	0.402578	0.301433	0.402578	0.817344	0.378869	0.378869	0.402578	-0.807946	0.995253	0.0199519	0.330534	2.4751
ydcR	0.90121	0.618145	0.350634	0.367145	0.405653	0.329422	0.348731	0.366877	2.38997	2.47057	-0.711739	0.429049	0.395844
aceE	2.45542	1.93411	1.8365	1.93411	1.79256	1.90689	1.90689	1.93411	-0.0954803	1	1.82782	1.5502	1.5502
ybl183	-0.403149	0.527219	0.140743	0.24079	0.246896	0	0.108461	0.121981	0	0.174012	-0.0129734	0	2.44733
ybaP	-0.378851	0.532284	0.87972	0.613804	0.618044	0.454513	0.584475	0.532284	0.893068	2.43603	-0.857027	0.785681	0.543649
ybl58	0.173743	-0.102618	-0.059745	-0.102618	-0.0385465	0	0	-0.102618	0	2.4255	0	0	0
rpoN	0.307921	0.746535	0.604701	0.608957	1.36771	0.717532	0.701985	0.753745	1.04504	2.40989	-1.58724	0.901043	0.999455
rdgC	-0.212008	-0.116048	-0.163199	-0.116048	-0.242089	-0.143269	-0.143269	-0.111174	0	-0.106626	0	-0.286655	2.40422
pflB	-0.408419	0.186474	0.075127	0.11244	2.38579	0.0935503	0.0943047	0.112031	-0.431461	-0.64305	-0.407967	0.00870894	1.49711
smtA	0.653198	0	-0.0902293	0.283643	0	-0.01984	0	0	1.28876	2.38508	1.25291	0.257666	0
rnhA	0	0	0.166986	0	0.0182083	0	0	0	-0.210706	0.294939	0	0.0801861	2.37961
yfeA	-0.258794	-0.00346925	0.0951625	-0.00346925	0	-0.0306907	-0.0306907	2.37112	-0.662463	-0.420589	-0.766641	-0.387384	0
glvA	0.130499	0.534998	0.410929	0.534998	0.482143	0.835506	0.733954	0.557584	0.167202	2.36065	0.156133	0.566536	0.131236
ptsH	0	0.816431	0.599958	2.3577	0.822749	0.805536	0.805536	0.816431	-0.421413	0.263331	-0.921504	0.508347	0.526991
bglB	-0.334743	0.258069	0.399456	0.258069	0.116515	0.230848	0.230848	0.258069	-0.410147	0.892548	-0.49025	0.910871	2.35339
ydhC	-0.0360628	0.0707493	0.12487	0.179369	0.210498	0.320431	0.155579	0.14656	1.04444	2.3477	0	0.47337	0.259919
mdtA	0.637365	-0.0525184	-0.0915627	-0.0525184	-0.0160356	-0.063407	-0.063407	-0.0525184	1.99706	2.33454	-0.741171	0.0922491	-0.294739
torA	-0.277709	-0.146003	-0.405642	-0.150287	-0.26264	-0.13952	-0.177108	-0.147584	0.607174	2.33449	-0.723712	0	0.442681
yjaB	-2.65913	0.910104	1.03592	0.910104	0.879282	0.903183	0.903183	0.648401	1.76652	2.33236	0	1.00799	0
fiu	0.0756761	-0.109629	0.00977816	-0.234629	-0.0530631	-0.261851	-0.261851	-0.234629	0.63388	0.468841	0	-0.368544	2.33153
ydiF	-0.049788	-0.219411	0.34156	-0.219411	-0.130196	0.202336	-0.246633	-0.219411	0.446212	2.18253	-0.600448	0.424775	2.31914
nudJ	-0.19987	0.443646	0.420152	0.446125	0.524689	0.649483	0.40952	0.272922	0.355954	2.31566	-0.297557	0.0603681	0
ilvI	0.864398	0.469018	0.204224	0.329986	0.358584	0.308496	0.308496	0.329986	0.984028	2.31414	0	0.430762	1.19243
gabD	-0.505353	0.696132	0.555723	0.700664	0.784451	0.67994	0.662686	0.636047	-0.350753	1.62065	0.0345024	0.513105	2.30939
mcrC	0.0982285	0	0.170659	-0.25605	-0.276304	-0.16115	-0.219521	-0.25605	0.378716	0.839145	0.389587	0.583085	2.3083
zapA	-0.374499	1.04987	1.19131	1.24387	1.16765	1.22922	1.22922	1.24387	-0.573673	0	0	0.912436	2.29756
creD	-0.791335	0	0.610963	0	-0.119191	-0.0152522	-0.0152522	0	0.635618	0.91642	0	0.104337	2.29687
iscR	0.230777	0.11211	0	0.11211	-0.0187984	0	0.00809259	0.11211	0	-0.822002	0	-0.271805	2.29456
yfiN	0	0.250995	0.403542	0.125917	0	1.94351	2.29092	0.269374	0	-0.237512	0.523787	0.270216	-0.0615583
yhbV	0	0	0	0	0.163783	0	0	0	1.01694	2.27341	-0.788068	0.26222	0.874431
ytfL	-0.378367	0.743137	0.572922	0.74339	0.725741	0.720462	0.663514	0.742403	-0.667168	0.505365	-1.54289	0.295981	2.2725
gudX	-0.183295	0	-0.133239	-0.0328224	0.00868972	-0.0849737	-0.000991301	2.27198	0.592508	1.47998	-0.17339	0.461769	0.450996
dkgB	0	0	0	0	-0.121753	-0.00742053	-0.00742053	0	0	-0.111086	0	-0.349087	2.25985
yjjM	0.19448	0.248779	0.038282	0.0720243	0.124871	0.103209	0.111183	0.148913	0.177398	2.25451	-0.469746	0.86688	0.767428
tynA_2	0	-0.0266566	-0.124267	0.473343	-0.168211	0	0.446122	-0.0266566	1.97063	1.53923	2.25233	2.17439	-0.410572
rpsL	0	0.764187	2.25154	0.764187	0.622633	0.736966	0.736966	0.764187	0	0	-1.5645	0	0.380272
thrA	-0.892928	0.181851	0.0959018	0.181851	0	0.182392	0.164865	0.181851	0.539143	1.54011	-0.169885	2.25127	0
srlA	0.076848	-0.139266	-0.308255	-0.139266	-0.220154	-0.154821	-0.154821	-0.139266	-1.29507	0.518566	-0.167547	0.425791	2.24278
hcp	-0.180614	-0.152085	-0.0307145	-0.152085	-0.043639	-0.179306	-0.179306	-0.152085	0.525141	1.22123	-0.728766	0	2.24058
ybdM	-0.436787	0	0	0	0	0	0	0.265338	0	2.23185	0	0.421912	0.00493278
lacY	0	0.00470702	0.238438	0.00470639	0.255004	0	0	0.288337	1.19685	2.23123	-0.872808	0.402155	0.337125
rhsD	-0.165589	1.01355	0.915936	1.01355	0.871992	0.986325	0.986325	1.01355	0.568917	0.0794345	2.22918	0.629632	0.629632
rne	-0.286844	-1.19517	-1.29278	-1.19517	-1.33673	-1.22239	-1.22239	-1.19517	-0.120427	1.67807	1.69854	2.22827	-1.57909
yafT	-0.0294934	0	0	0	0	0	0	0	-0.313299	2.21667	-1.03794	0	-0.087171
yfiQ	0.132891	0.311089	0.180575	0.09056	0.169535	0.283867	0.223325	0.311089	0.289839	0.0682512	-0.929216	2.21613	-0.0728262
rpsD	-0.0906533	2.21596	0.794316	1.06966	0.899875	1.04244	1.04244	0.557112	-0.734205	0	0.154132	0.810286	0.685747
ybhU	-0.147327	-0.553154	-0.650765	-0.553154	-0.694708	-0.580375	-0.580375	-0.553154	1.24507	2.21317	2.17705	0.0629313	-0.937069
hepA	-0.561636	1.13102	1.03341	1.79769	0.989469	1.1038	1.1038	1.13102	0.848914	2.21171	0.0148142	0.747108	0.747108
surA	-0.663482	0	0.0343268	0.30531	-0.0604778	0	0	0	-0.406222	0.0902897	-0.0107648	0	2.21144
rpsM	-0.475804	-0.104023	-0.201634	-0.104023	-0.245577	-0.131245	-0.131245	-0.104023	-0.409193	-1.03814	2.21115	-0.487938	-0.487938
dnaG	-0.719949	-0.133232	-0.230842	-0.133232	-0.274786	-0.160453	-0.160453	-0.133232	-0.534169	-1.06734	-0.853774	-0.517147	2.20616
xylR	-0.52749	-0.438125	-0.516448	-0.387492	-0.568737	-0.0987825	-0.410471	-0.387492	0.494845	-0.774743	0.710954	-0.407484	2.20471
livF	0.290264	-0.015642	-0.0542666	-0.0155529	-0.0735155	-0.0764711	0	-0.0155529	0.837737	2.2019	0	0.331892	0.70458
yhhK	0.642007	0	0	0.102714	0	0.229937	0	0	0.966302	2.19851	-0.0108274	0.0991501	0.878989
uidC	-0.10698	-0.411943	-0.438125	-0.411943	-0.289838	-0.439165	-0.367736	-0.411943	0.265168	-0.117888	-0.238886	-0.27408	2.18672
glcG	-0.595835	0.275672	0.269455	0.589641	0.192543	0.259527	0.250418	0.275672	0	2.18576	-0.686355	0.571034	1.26184
ybl78	-0.605892	0	0	0	0	0	0	0	0	0.353889	0	0.0227311	2.18566
rplF	-0.146184	0	0	0	0	0	0	0	0	-0.0963406	0	0	2.18344
wcaI	-0.923502	0	-0.114761	0	0	-0.315289	0	0	0.757057	2.18261	-0.218353	0.28264	0.413333
yjfC	-0.0608403	-0.00444804	0	-0.00444804	0	-0.0958593	0	-0.0267963	0.0613088	2.18052	0.197447	0.542691	0
accD	-0.186272	0.627559	0.645118	0.436465	0.0951585	0.460697	0.488361	0.440799	-0.166334	2.17428	-0.822093	0.511475	0.414738
yeiT	-0.22248	0.282346	0.373163	0.282346	0.296825	2.17159	0.556404	0.282346	-0.514094	0	-0.536561	0.193852	1.1841
yfhK	0	0.185266	1.07567	0.467667	0.333474	0	0.206751	0.239266	1.39824	2.1711	0	0.989358	0
yhcM	0.431921	0.110013	0.245492	0.141836	1.85473	0.374334	0.296577	0.336543	-1.60899	0.875515	-0.829296	0.279602	2.16227
rplD	0	0.839548	0.97678	0.839548	0.804302	0.839548	0.839548	0.839548	0	0.431752	0	0.792369	2.16147
yebT	-0.480726	0.297928	0.224233	0.371907	0.241314	0.375217	0.375217	0.395022	-0.847553	-0.453317	-0.117732	0.0434036	2.15883
glmU	0.18806	0.216931	-0.0247671	0.0728437	0.166286	0.0456222	0.0456222	0.163753	0.4485	2.15712	-0.321943	0.341844	-0.166984
yhhH	0	0.546861	0.297445	0.546861	0.405307	0.51964	0.440581	0.546861	0.446344	0.0439538	0	1.17035	2.1558
sucC	0	0.390179	0.439525	0.152501	0.0449574	2.1476	0.615692	0.45968	0.305735	1.78224	-0.524572	0.255942	0
torS	-1.43955	-0.462856	-0.560467	-0.462856	-0.60441	-0.490077	-0.490077	-0.462856	0.84908	-1.06363	0.105728	-0.0727947	2.14756
serW	0	1.30983	1.21222	1.30983	1.16828	0	2.14747	0	0	1.77196	-0.778553	0.925917	0.925917
kduD_1	-0.473777	1.0438	1.37713	1.0438	1.0438	1.0438	0.737832	1.0438	-0.536168	2.14022	-0.208289	0.892977	0.892977
mhpB	0.824209	0.109872	0.0453565	0.109872	0.398932	0.158426	0.268274	0.109872	1.65314	2.14005	0.95798	0.10583	0
prpE	-0.80258	0.588185	0.331719	0.428257	0.335472	0.377961	0.50463	0.516501	0.663933	2.13632	-1.20205	0.303136	0
gyrB	-0.471432	1.47247	1.37486	1.31101	1.31305	1.35455	1.44524	1.39439	-0.555006	1.92715	0.718246	1.04638	2.13579
yeaZ	0.35477	-0.0114843	0	-0.0114843	0.0483601	0.104957	0	0	1.07381	2.13146	0	0.597254	0
mhpA	0.411039	-0.00696023	-0.104571	-0.00696023	-0.148514	-0.0341817	-0.0341817	-0.00696023	0.801958	2.12885	-0.21557	0.18898	-0.390875
yeaX	0.707996	-0.0774208	-0.12166	-0.0774208	0	-0.104642	-0.0546423	-0.0774208	0.973622	2.12862	0.555206	1.04257	0.513658
hslV	-0.00906675	0.308332	0.377312	0.0291707	0	0	0	0	0	2.12781	0	1.18307	0.943482
yjeS	0	0.423691	0.32608	0.423691	0.142026	2.12515	0.729803	0.423691	-0.334862	0.148319	-0.370849	0	0
puuA	0.398282	1.04818	1.05792	1.02592	0.985899	1.09151	1.08324	1.11116	-0.316681	0.286183	-0.233999	2.11623	0.472853
ulaE	-0.612247	0	-0.132597	0	-0.03982	1.08763	0.00935958	0	0.3033	0	0	0	2.10835
hyaA	0.206727	0.188845	0.0926834	0.190294	0.0487401	2.10769	0.319323	0.190294	-0.911687	-0.639268	-1.82418	0.320811	0.103331
tktB	-0.0449413	0	0	0	0.188605	-0.000493061	-0.000493061	0	0	0.0570608	-0.42003	0.218761	2.10589
flhD	0.151943	0.0386858	0	0	-0.102868	0.0114644	0.0114644	0.0386858	-0.382479	2.10563	-0.892399	1.32988	-0.345229
argK	-0.0845398	0	-0.0236385	0	0	0	0	0	0.459846	2.10307	0.656424	0.430344	0.356307
hsdR	2.1012	0.0135465	-0.0840643	0.0135465	-0.128008	-0.0136749	-0.0136749	0.0135465	0.662026	0.0794345	1.55933	-0.370368	0.629632
slyD	-0.0129795	0.880599	0.763385	0.880599	0.0512176	2.1002	0.911316	0.962803	-0.297709	0	0.0303777	0	0
alaX	0	0	0	0	0	2.09967	0.188001	0	0	0	0	0	0
rpsI	-0.017288	2.09884	0	0	0	0	0	0	-0.582285	0	-2.05314	0	-0.0976384
glpE	-0.30878	0	0	0	0.0460297	0	0.00753025	0	0	2.09184	-0.98323	0.189912	1.04264
ybeM_2	0	0.734814	0	-0.309805	-0.451359	0	-0.337027	-0.309805	-0.137803	0	0	-0.360387	2.08919
yhjJ	0.0873173	-0.139872	-0.0618673	0.0243125	-0.233963	0.659476	-0.100891	-0.161292	0.472144	2.08861	-0.0662395	0.698464	1.78981
yfeO	0.603454	0.343117	0.307198	0.343094	0.777177	0.319848	0.564195	0.343139	0.187697	2.0874	-1.73623	0.932315	0
bcr	-0.910375	0.0373945	0	0.0365445	0.00213136	0.191256	0.128039	0.282618	0	0.169577	0	-0.13171	2.08694
yadB	-0.312554	0.247068	0.0545808	2.08107	0	0	0.21868	1.16275	-0.92229	-0.019997	-2.21181	0	0
ynl73	1.01761	0.385546	0.56233	0.621703	1.0819	0.519432	0.605537	0.622057	0.914967	-0.0299663	-0.139331	0.852036	2.07972
yjeI	0.00297578	0	0	0.0427675	0.215293	0.623433	0.335209	0	0	2.07783	0	0.569524	0.427542
malS	-0.533491	0.140966	0.154828	0.267953	0.204189	0.912887	0.304894	0.260751	0.938133	2.07657	-0.776891	0.558358	0.992567
kefC	0.273171	0	0.116076	0.111956	0	2.0747	0.153367	0.032811	0.344947	1.28238	-0.127245	0.028041	0.723873
rrmA	-0.15382	0.857088	0.708294	0.857088	0.649835	0	0	0.366827	0	0	0	0	2.07363
ddpB	0.0142249	-0.208119	0.135181	-0.144036	0	-0.150919	-0.151217	-0.198253	1.03485	2.06707	-0.260491	0.477757	0.748677
atpF	-0.553662	0.314045	0.321496	0.314045	0.662786	0.519016	0.286824	0.314045	0	0	0	0	2.0628
rplE	0.0489219	-0.726139	-0.823749	-0.726139	-0.867693	-0.75336	-0.748956	-0.726139	-0.685342	-1.66025	2.06065	-1.11005	-1.11005
agp	-0.751927	0.255576	0.555343	0.552527	0.0959075	0	0.201462	0.315574	0.337477	0.869269	-0.304377	0.144478	2.0584
ubiD	0	1.08708	0.0978954	0.185062	0.367399	0.082561	0.171583	0.385106	0	2.05518	0	0.785647	1.25297
aspU	-0.934095	0.437686	1.92504	0.437686	0.296132	0.410465	0.410465	0.437686	-1.91383	0.503574	2.0476	0.0537713	0
hlyE	0	-0.335407	-0.172559	-0.333355	-0.237964	-0.353293	-0.354763	-0.266517	-0.192747	-0.622823	0	-0.245976	2.04687
ygcP	0.238293	0.0647046	0.0681818	0.0531564	0.0381482	0	0.102612	0.0531564	0.970604	2.04478	0.513344	1.01206	0.289628
hemF	0.0638877	0.0233138	0.55103	0.0233138	0	0	0.0453521	0.0233138	1.81125	2.04384	-0.631472	0.378806	0
trxA	0	0	0	0	0	0	0	0	0	2.04325	0.507861	1.01278	1.50616
yagR	-0.430215	0.136841	0.0833929	0.152218	0.0151901	0.111982	0.128142	0.152218	0.691758	2.04176	0.472128	0.908962	0.452344
ftsZ	-2.13811	2.04103	1.94342	2.04103	1.89947	2.01381	2.01381	2.04103	-0.310493	1.10692	-1.87262	1.65711	1.65711
malT	-2.13811	2.04103	1.94342	2.04103	1.89947	2.01381	2.01381	2.04103	0.859432	1.10692	-1.87262	1.65711	1.65711
yjbT	0.255645	-0.107203	-0.104148	-0.10545	0.131216	-0.0383907	0.129366	-0.105078	1.10701	2.03349	-0.184311	0	0
hsdM	-0.409892	0.220481	0.133018	0.228064	0.0890746	0.203407	0.203407	0.228064	-0.134343	-0.466197	-0.749833	-0.137132	2.03288
yjeM	0.247167	-0.0300314	-0.00264216	-0.0300314	0.0752012	0.508567	0.162701	-0.0300314	0.432968	2.02977	0.617925	0.165612	-0.314886
ydiO	0	0.412346	1.34232	0.598898	0.477797	0.555729	0.579616	0.598898	-0.797963	2.02966	-0.0515988	0.552796	0.036132
norV	-0.204546	0.0330681	-0.0298397	0.0330681	0.135064	0.0197537	0.00882985	0.0330681	0.826009	2.02757	-0.178233	0.439846	0.575761
ompR	0.114942	0	0	0.25516	0	0	0	0	0.394093	2.02669	-0.247948	0.513718	0
ulaF	-0.000412985	0	0	0	0	2.02303	0.60902	0.0172582	0	1.829	0	0.545296	1.62891
wbbC	0	0.684242	0.586631	0.684242	0.487165	1.2375	0.657021	0.684242	-0.1235	0.000130162	0	0.800327	2.01531
nanC	0	0	-0.0211345	0.322364	0.206498	0	0	0	-0.48487	-0.466893	-0.474655	-0.251883	1.9953
yehM	-0.471875	0.286546	0.284945	0.286546	0.144992	0.163183	0.259325	0.286546	1.36431	1.99463	-0.40435	0.523183	0
hmp	0	0.417175	0.150363	0.427004	0.430472	0	0.37221	0.418537	0.0615897	1.09459	-1.05383	0.84858	1.99077
lrhA	0.614799	1.98658	1.88897	1.98658	1.84503	1.95936	1.95936	1.98658	-2.36494	1.05247	-1.92707	1.60266	1.60266
potI	0.115128	0	0	0	0	-0.0363971	-0.00127435	0	0.840984	1.98551	-0.0537134	0	1.02442
valS	-1.98199	0.612184	0.514573	0.612184	0.47063	0.584963	0.584963	0.612184	-1.73934	-0.321928	1.98394	0.228269	0.228269
fecA	-0.233794	-0.0165198	0.525801	-0.0165198	0.133011	1.98328	0.331804	-0.0165198	0.310192	1.111	-2.21771	-0.001951	1.34294
higA	0.255437	0	0.0192663	0	0	0	0	0	1.18732	1.98072	0	0.367614	0.136853
ribA	-0.225678	0	0	0	0	0	0	0	0.515266	1.97853	-1.07753	0.120717	0.85969
ftsI	0.225872	0.660824	0.666559	0.574321	0.56412	0.706976	0.522916	0.48151	0.706201	1.96807	-0.825078	0.453951	1.66195
glgA	-0.6574	0.329719	0	0.0899561	-0.0122803	0.0652044	0.136392	0.0899561	-0.368959	-0.567558	0.130904	-0.183213	1.9672
cmk	0.878106	1.82564	1.38381	1.82622	1.56188	1.81909	1.65897	1.13303	0.243961	0	-1.33225	1.96328	1.31545
rnt	-0.449129	0	0	0	0	0	0	0	-0.437975	0	-1.16448	-0.131361	1.96234
yecD	-0.46707	0.382212	0.238487	0.304787	0	0.287098	0.355091	0.304787	-0.0777373	1.96049	-0.721486	0.457358	0.196887
dcp	-0.475352	0.783174	0.718281	0.783174	0.633202	0.765077	0.765077	0.850213	0	1.9494	-0.686314	1.00218	0.301873
glnX	0	0.21167	0	0.21167	0.172885	0.214853	0	0.481257	0.267128	1.42013	-0.535489	0	1.94864
yfaA	0.245386	0.352599	0.338321	0.352599	0.151898	0.325377	0.325377	0.352599	0.836524	1.70945	0.186447	0.682838	1.94818
pth	0	0.18447	0.528209	0.460169	0.334501	0	0.285366	0.460169	0.0352312	1.94276	-0.342086	0.46638	0
ampG	-0.315236	0	0.702052	1.94076	0.59875	0.688228	0.688228	0.709532	-0.160565	0	-1.09429	0.512431	0
ybl112	-0.268815	0	0	0	0	0	0	0	0	0.527564	-0.507296	0	1.93793
yjcS	0	-0.159237	-0.0652178	-0.159237	-0.290574	-0.258652	-0.175736	-0.159237	0.595962	-0.227262	-1.22424	-0.167816	1.93775
chaA	-0.318004	0.435452	0.647078	0.646776	0.505711	1.93581	0.484528	0.460655	0.0908078	0	-0.576986	0.611068	0.87363
yhjA	-0.0830252	0.199744	0.131245	0.199744	0.0227513	0.180641	0.180641	0.199744	0.384676	1.93439	-0.332449	0.568519	-0.0605848
narY	-0.66831	0.952134	0.788719	0.952134	0.810579	1.05676	1.93058	0.934565	-0.617421	0.563474	0.213361	0.790031	0.413479
fhuA	-0.46434	0.376221	1.04985	0.376221	0.18752	0.348999	0.348999	0.376221	0.0201972	0.775574	0.166351	0.626394	1.92699
yqeB	-0.184612	0.244677	0.147003	0.245972	0.11145	0.200024	0.214385	0.14483	1.06502	1.92458	-1.14845	1.36758	0.357604
ybhQ	0.320444	0	0	0.366629	0	-0.00956491	-0.0145178	0	1.4527	1.92055	0	0	1.02457
kdpB	0	0.652899	0.638826	0.664454	1.91589	0.637232	0.605366	0.664454	0.522292	0	-1.8019	0.549023	0.562737
nmpC_1	0.579827	0	0	0	0	0	0	0	0	0	0	0	1.91586
gltX	-0.82476	0.421345	0.323734	0.421345	0.27979	1.91496	0.394123	0.421345	-1.99406	-0.512768	-2.19982	0.0374295	1.31273
hyaB	0.164822	0.00927254	0	-0.319947	-0.396295	1.25379	-0.0164369	-0.333791	0.211896	0	-0.0624695	0.0295671	1.9137
nanA	-0.067035	0.417073	0.366002	0.273651	0.285782	0.647316	0.279849	0.398578	-0.248837	0.193394	-0.808729	0.130735	1.91331
trpE	-0.680151	0.59173	0.41351	0.617224	0.753665	0.141005	0.65667	0.86392	0.585401	1.91258	-1.34641	1.25318	0.200606
leuZ	0	1.91239	0	-0.509731	-0.651285	0	0	-0.509731	0	-0.618308	0	-0.126264	0
mppA	0.258201	0.797076	1.91173	0.90156	0.760006	0.788679	1.20767	0.90156	-0.231948	-0.00778753	-0.0552205	0.517645	0
exuT	-0.563388	0.535543	0.437932	0.493726	0.538076	0.508322	0.508322	0.535543	0	1.83015	0.344985	0.701118	1.91081
ybl228	0.117775	0.0788314	0	0.0788314	0.135078	0.0557978	0.0557978	0.0788314	0	1.90987	0	0.412887	0
ynfF	-0.317871	0.715877	0.777989	0.715877	0.969248	1.06903	0.696912	0.728589	-0.0886774	1.14806	-1.74028	0.67278	1.90879
tmk	0	-0.0365791	0	0	0.191166	-0.0118574	0	-0.0253787	0.455438	1.9064	-0.0585778	0.145086	0
thiL	0	0.0937449	0	0.129131	0	0	0	0.0622763	0.126607	0	0	0	1.90338
dkgA	-0.655385	0.817245	0.371793	0.594583	0.511852	0.660594	0.622635	0.594583	-0.00421348	0.408487	-0.813812	0.350144	1.90317
infA	-0.168061	0	0	0	0	0	0	1.9009	-0.417884	0	-0.196467	0	0
rng	0.951819	0.129693	0.162076	0.129693	0.0139889	0.102471	0.655535	0.129693	0.953874	1.90047	0	0.0676676	0.875504
cbrA	0	-0.111877	-0.0844875	-0.111877	-0.0380173	0	-0.0974315	-0.0702101	0.46668	1.90045	0	0	0
yjeP	0	0.711835	0.671555	0.711835	0.745453	0.710836	0.710836	0.711835	-0.468213	1.41504	1.89493	0.661049	0.570983
melR	-0.0768531	0.18817	0.145998	0.0129138	0.156618	0	0.0311792	0.0130174	-0.0320188	1.88947	-0.642889	0	0.967935
lpxK	0.00956645	-0.0439011	0.361549	-0.0439011	-0.00832761	0.0494363	0	0.294666	0.82235	1.88623	0	0.506024	0.540377
secD	0.0262783	1.88349	1.78588	1.88349	1.74193	1.85626	1.85626	1.88349	0.33932	0.949374	-2.03016	1.49957	1.49957
yagX	-0.632698	0.147429	0.19025	0.147429	0.00587449	0.120207	0.120207	0.147429	0.865343	1.5835	1.03178	0.120683	1.88192
cheA	-0.00143632	0.606267	0.633656	0.606267	0.776937	0.579045	0.579045	0.606267	1.40752	1.88038	-0.961744	1.49807	0.239943
mcrB	0	-0.0290775	-0.14161	0	0	0.188533	-0.00768493	0	-0.54168	-0.360093	0	0	1.87994
yfaD	0	0.101436	0	0.780143	0	0.935489	0.176053	0.113844	0	1.8789	-0.0743166	0.83161	1.05435
ddpA	0.828579	0	-0.0126214	0.00806635	0.683404	-0.0380325	0	0	0.980375	1.87651	-0.303234	0.45574	1.42715
cfa	-0.979193	0.24494	0.427363	0.517188	0.514044	0.4035	0.493365	0.521875	0.205519	1.87122	0.14104	0.469368	0.103097
copA	-0.651928	0.504633	0.407022	0.504633	0.529746	0.477412	0.477412	0.504633	-0.190723	1.8694	0.75023	0.730252	0.0507165
mdtC	-0.639303	1.21791	1.12029	1.21791	1.07635	1.19068	1.19068	1.21791	-1.54865	1.86876	0.626185	1.83399	0.83399
ybgH	-0.930496	0.64245	0.536909	0.64245	0.499972	0.759316	0.615229	0.64245	0.0904373	1.86202	-1.63667	0.748746	0.227617
cirA	0.0430304	0.262735	0.165124	0.262735	0.62118	0.235513	0.235513	0.262735	1.86184	0.121104	-1.98995	1.03978	-0.12118
ampE	-0.0770285	0.468816	0.651719	0.371374	0.389767	0.495456	0.328742	0.371374	0.433279	1.8569	-1.65732	0.720958	0
asnV	0	1.81616	0.90851	0.985031	0	0	0.963144	0	-1.31343	0	0	1.85678	1.35477
tig	-2.39187	1.78727	1.68966	1.78727	1.64572	1.76005	1.76005	1.78727	0.757678	1.85316	-2.12638	1.40336	1.40336
ydiM	0.183418	0.0100708	0	0.0145269	0	0	0	0.0145269	0.144802	1.8501	-0.13691	0.605523	1.14582
adiY	0	0.208897	0.179945	0.193299	0.199574	0.705115	0.269116	0.207085	-0.203323	-0.536008	-0.459612	0	1.84654
yjcZ	-0.0764295	-0.289834	-0.139578	-0.289834	-0.205485	1.14781	-0.242844	-0.289834	-0.566089	1.84538	-0.755301	0.321789	1.39955
dhaM	-0.0206078	0.216316	0.351769	0.216316	0.13118	0.0834813	0.567229	0.216316	0	1.84392	-0.342807	0.597916	0.662037
yeiM	-0.814909	0.0506308	0.125989	0.0170251	0.0607474	0.0301909	0.0287961	0.0506308	-0.428501	0.179216	0	0.221587	1.84079
pheV	-0.411978	0.723465	0.196043	0.723465	0.573772	0.715361	0.715361	0.723465	-0.940906	0.12215	0	0.505439	1.84041
ybjN	-0.083975	0.406889	0.326104	0.266757	0.557581	0.227851	0.346992	0.715717	1.21965	1.83779	0	0.547087	0.072202
yhaH	0.174462	0	0	0	0.00729277	0	0	0	1.52256	1.83331	-0.709148	0.0553868	0
glnD	-0.874837	-0.360199	-0.45781	-0.360199	-0.501753	-0.387421	-0.187421	-0.360199	0.537878	-0.53284	-1.41813	0.808982	1.83296
yjjK	-0.271068	0.227018	0.212974	0.0841613	0.228321	1.83231	0.199797	0.0841613	-0.886831	-0.421379	-1.46717	-0.156897	0.56683
emrB	-0.454984	0	0	0.130006	-0.0176622	0	0	0	0.0955201	1.06967	-0.512131	0.512878	1.82767
gsiA	-0.0336723	-0.0943644	-0.19016	-0.094379	0.00430519	-0.117041	0.661132	-0.0943644	0.259564	1.82711	-0.0702332	0.679987	0.00498219
yicO	-0.617279	0.144727	0.205858	0.144727	0.456012	0.109506	0.120629	0.144727	0.519182	1.82624	-0.677565	0.305577	0.56152
speA	-1.07659	0.398767	0.720014	0.452842	0.424037	1.82452	0.579594	0.452842	-0.386492	0	0	0.695535	0
fepB	-0.400264	0.0588172	0	0.484526	0.0652464	0.113408	0.0344611	0.0588172	0	0	0.207805	0.454221	1.82444
ydhK	-0.070373	0	-0.00409675	0	0	0	0	0	1.82402	0.323378	0.0157666	0.308403	0
atoS	0	0.177929	0.367584	0.177544	0.0601578	0.392542	0.256656	0.177929	-0.438056	1.82393	-0.323758	0.645555	0
yddJ	-0.338368	-0.178256	-0.0340908	-0.218256	-0.147829	-0.00197875	-0.165477	0.30917	0	-0.793064	-0.0597264	-0.171975	1.8234
hofQ	-1.12538	0	0.516105	0.302349	0.204186	0.293014	0.300048	0.302381	0	0	0	0.101975	1.81973
aidB	-0.363326	0.0553351	0.0589061	0	-0.0148754	0.661555	0.212665	0	-0.390912	1.58548	0.0778315	0.346665	1.81727
kdpE	0.452194	-0.419304	-0.422247	-0.431779	-0.143176	-0.39129	-0.36668	-0.419304	0.707021	0.456491	-0.107163	0	1.81567
lrp	-0.724941	0.753464	0.725517	0.820984	0.913723	0.801897	0.705871	0.820984	-0.448646	0.0959209	-0.0136482	1.81148	0.578006
ybiT	-0.270875	0.760809	0.62275	0.119261	0.338771	0.0769521	0.217427	0.119261	-0.060318	0.41266	-0.32278	0	1.81125
dmsB	-0.503275	0	0	0	0	-0.0184458	0	0	-0.581982	-0.333569	-0.857024	0	1.81033
ycjX	0.892797	0.349384	0.191949	0.295264	0.394631	0.58951	0.35455	0.351326	1.33177	1.80983	0	0.484183	0
yeaW	0.00234237	0.123909	0.0354354	0.617633	0.131659	0.142891	0.205391	0.0413834	1.00992	1.80893	-0.644958	0.301681	0.637016
mipA	-0.0268568	0.498948	0.441203	0.55157	0.360636	0.474969	0.746262	0.498353	-0.142485	-0.304102	-0.623721	0.223539	1.80864
rstB	-0.937595	0	0	0	0	0.242263	0.0796872	1.80622	0	-0.101021	0	0.231063	0
mutL	-0.135627	-0.16588	-0.263491	-0.16588	-0.307435	1.80599	0.0904502	-0.16588	0	-0.599992	-1.2427	-0.549795	-0.299795
ydaM	0	0	0	0	0	0	0	0	0	1.80491	0	0.418695	0
rsd	0.625621	0	-0.10989	-0.273942	0.122528	0	-0.197875	-0.331148	1.80378	1.32396	0	0	0.0735499
macA	0.0253246	0.831731	0.687596	0.822524	0.718253	0.758699	0.80743	0.944755	0.779599	0.785012	-1.61307	0.506808	1.80004
rlmE	0	0.682756	0	0.682756	0.568049	1.79933	0.529493	0.682756	-0.449701	0	-0.897875	0.220272	0.141131
glnB	-0.0245262	0.228263	0.350987	0.215786	0.206479	0.835388	0.35943	0.226534	0.333015	0.612871	-0.336814	0	1.7964
yehW	0	0.105852	0.356565	0.105852	0.208072	0.395269	0.093721	0.1253	0.830571	1.7963	0	0.677639	0
phoB	-0.0901955	-0.0208392	0	-0.0208392	-0.000374568	-0.0427613	-0.00615566	0	0.641151	1.79614	-0.305982	0.272979	0.151626
proW	-0.453846	0.14617	0.112328	0.636884	0.159955	0.165469	0.18465	0.203475	0	0	0	0	1.79566
uidR	-0.322374	0.0691014	0	0.163105	0	0	0.00301116	0.0149642	0.0845565	1.79549	0	0.226851	0.494119
nuoM	-0.317532	0.613663	0.627163	0.613663	0.472109	0.586441	0.697552	0.613663	0.427054	1.79413	-0.793501	1.30911	1.04725
yeiB	-0.471291	-0.214846	0	-0.214846	-0.00591524	1.79329	0	-0.118729	0.290096	1.04603	0.439908	0.406881	1.08575
hycD	-0.0844481	0.649329	0	0	0	0	0	0	0.278242	1.79247	0.246735	0.522125	-0.108809
yohO	0.0230262	0	0	0	0.106877	0	0	0	0.217874	1.78941	-0.472123	0.51436	0
apt	-0.378598	0.243254	0.180354	0.243254	0.120739	0.367056	0.201538	0.243254	0	1.60222	-0.35205	0.175979	1.78909
ycgV	0.0262783	0.883486	1.78588	0.883486	0.741932	0.856265	0.856265	0.883486	0.232405	-0.0506261	-0.708234	0.499571	0.499571
pqiA	0.0245662	0.194455	0.105892	0.194455	0.203727	0.974735	0.282439	0.757643	0.765473	0.649315	0.212531	0.250928	1.78506
hipA	-0.0955919	0	0.000390886	0.0836219	0	1.78312	0.201314	0.0686827	-0.151745	1.2016	-0.0713414	0.50594	0.41446
yajQ	0	-0.0227215	0.20378	-0.0227215	0	0.872866	0.0992763	0	-0.111098	0.173553	-0.00345313	0.317431	1.78249
uidA	-0.630938	-0.0123068	-0.109918	-0.0123068	-0.142001	-0.0395283	-0.0395283	-0.0123068	0.351859	1.78047	-0.421573	0.330191	1.56774
serX	-0.473028	0.964742	0.826088	0.952425	0.968239	1.13883	0.935587	0.952077	-0.404578	1.78039	0	0.583644	0.605674
fryA	-0.404369	1.14478	1.12082	1.25393	1.09148	1.24375	1.18288	1.03853	0.00379729	1.78015	-0.131209	1.12403	0.514641
lafU	0.47831	-0.312054	-0.191288	-0.350791	-0.19021	-0.256684	-0.229374	-0.311689	0.469695	1.77747	-0.315729	0.582783	0.636125
glcA	0.229678	0.176798	0.233033	0.176798	0.31101	0.457269	0.149577	0.176798	0.840357	1.77703	-0.914587	0.376342	1.66949
frr	-0.407691	0.588563	0.921609	1.14285	0.544333	1.18253	0.748762	0.588563	0.147096	1.7762	-0.171984	0.702023	0.805791
wcaK	-0.474247	0.499593	0.413387	0.509451	0.357802	0.354417	0.693302	0.499593	0.334928	1.77587	-1.62453	0.329504	1.15169
hflK	-0.713979	0.0721547	1.77393	0.0688016	0	0.0548649	0	0.0721547	0.250616	0	-1.22494	-0.0225599	1.58116
ygjG	-0.164047	-0.247675	0.0668915	-0.247675	-0.112548	0	-0.271432	-0.247675	0.0898202	1.77012	0	0	0.363669
yncI	-0.217858	0.664432	0.58309	1.76767	0.79647	0.738494	0.641747	0.664432	0	0	-0.854524	0.552836	0.0305158
deoA	-0.597447	0.690602	0.600231	0.690602	1.76572	0.67523	0.929093	0.690602	-0.690111	-0.119526	-0.0338556	0.683091	0.571046
lamB	0.676228	0.267208	0.0235974	0.271561	0.483351	0.252573	0.222126	0.271561	1.40236	-0.594236	0.768162	1.76487	0.961764
aceF	-0.588843	0.0666327	0.63243	1.75901	0.151502	0.408692	0.182268	0.560837	-0.0907424	0.581028	-0.334779	-0.031568	0.278421
puuB	-0.282786	0.0693458	0.147555	0.158335	0.157187	0.190845	0.223812	0.147346	-0.513869	1.75873	-0.270553	0.888086	0.979329
cmr	-1.02722	1.0862	0.987708	0.882092	0.900837	0.854975	0.831087	0.88189	-0.395648	1.75869	-0.573954	0.99184	0.741059
ppdC	0.0322292	0	0	0.599488	0	0	0	0	0.340093	1.75277	0.0598515	0	1.52867
yeaI	-0.330477	0.0652507	0.17696	1.75055	0	0.126322	0.0576917	0.221043	-1.12432	-0.366558	-0.00082237	0.216966	0.961927
bcsB	-0.0574953	0.249647	0.363302	0.146555	0.0341868	0.124946	0.114636	1.74815	0.853192	0.0912461	-0.623079	0.485134	0.576418
glpF	0.304233	0.840308	0.837182	0.844361	0.66775	0.825419	0.825419	0.845626	0.0681377	1.74399	-1.45158	1.19023	0.518562
can	-0.282	0.303154	0.00638445	0.300095	0.670489	0.430813	0.381691	0.367099	0.918377	1.74348	0	0.836152	1.49509
yncG	1.13329	0	0	0	0	0	0.147063	0	1.5421	1.74305	-0.855904	0.270737	0.803297
sucA	-0.852706	1.74147	1.64386	1.74147	1.59991	1.71425	1.71425	1.74147	0.711875	0.807355	-0.172181	1.35755	1.35755
mngB	-1.11467	1.7406	0.381894	0.479504	0.83795	0.452283	0.452283	0.479504	-0.0576691	-0.454608	-0.147342	0.49183	0.0955895
puuC	-0.131013	0.469624	0.084392	0.0357969	0.396355	0.0484756	0.13775	0.130614	0	1.73801	-0.70732	0.341011	0.917787
focA	-0.724719	0.313764	0.354972	0.535864	0.6487	0.51087	0.508607	0.537093	-0.324749	1.66222	0	0.695314	1.7379
ftsW	-0.26983	-0.0171523	-0.0283745	-0.00439144	0.058876	0.306509	-0.0513112	-0.0171523	-0.0331841	-0.380609	-0.364064	-0.276959	1.73637
cpxR	-2.39187	1.59594	1.63195	1.6795	1.60144	1.73618	1.61258	1.59669	-2.56425	0	-2.12638	1.37393	1.40336
yhjQ	0.187221	0	0.119473	0.102618	0	0.0354777	0	0	1.36127	1.73311	0.375496	0.228554	0
ybl142	0.0780398	-0.16922	-0.199956	-0.16922	-0.18754	0.175971	-0.00507906	-0.167546	0.206561	1.73194	0	0.0472301	0.479093
yhjK	-0.318137	0.457074	0.359464	0.457074	0.31552	0.429853	0.429853	0.457074	-1.42698	1.73129	-2.59219	0.765046	0.0731595
aspV	-0.242875	1.11238	1.05971	1.11238	0.973141	0.85785	1.07264	1.11238	-0.425378	1.72907	-0.0268557	1.11831	0.531773
ygcF	0.952278	0.883486	0.785875	0.883486	0.741932	0.856265	0.856265	0.883486	1.23241	-0.0506261	1.72473	0.499571	0.499571
cnu	-0.0352065	0	0	0	0	0	0	0	-0.173213	1.72395	0	0	0
ydiB	-0.00304119	0.309896	0.230014	0.309966	0.252211	0.0531041	0.219836	0.309966	-0.0771814	-0.0582236	0.462688	0.0925021	1.7211
ycbZ	0.240403	1.61218	1.51457	1.61218	1.47063	1.58496	1.58496	1.61218	1.7201	0.678072	-2.30146	1.22827	1.22827
fbaA	-0.419567	0.236904	0.0862447	0.236904	0.273251	0.243441	0.20662	0.241998	-0.572638	-0.155549	-0.0858527	0.316497	1.72005
intR	-0.260357	0.236095	0.541031	0.236095	0.273469	0.307665	0.213927	0.236095	0	1.71975	-0.49028	0.647977	0.734681
nrdF	-0.057691	0	0.329263	0.0662918	-0.0673265	0.00723505	0.022378	0.0467688	-0.300522	0.235167	0	0.185491	1.71647
acs	0.0185451	0.137078	0	0.137078	-0.00447642	0.931983	0.109856	0.137078	1.00596	1.7159	-0.462629	0.596068	0.696458
ydfU_2	0	0	0	0	0.161309	0	0	0	0.918489	1.7149	-1.4895	1.042	1.05779
umuC	0.366038	0.13787	0.040259	0.13787	0.365596	0.110648	0.110648	0.13787	0.963229	1.71319	-0.935918	0.228516	0
mrp	-0.535404	0.395058	0.297448	0.395058	0.253504	0.367837	0.35226	0.395058	-0.502187	1.71306	-0.641865	0.305239	0.330326
leuP	0	0	0	0	1.71117	0	0	0	0	0	0	0	0.616841
mdoG	0.0507618	0.186223	0.409694	0.186223	0.0932662	0.171192	0.147638	0.18486	0.0183934	-0.374511	-0.609848	0	1.71004
rof	0.543247	1.01236	1.12543	1.7086	1.11078	0.805586	1.03984	1.11862	0.481443	0.223002	-1.01239	0.914455	0.943727
holB	0.428887	-0.0636719	-0.253467	0.318894	-0.234728	-0.177792	-0.115037	-0.154837	0.590386	0.0818348	0	0.327361	1.70805
yacC	0.294368	0.075302	0.0985473	0	0	0.256934	0.0294369	0	1.06107	1.70606	0	0.324163	0
fdnH	0	0.258078	0.426582	0.0176199	0.357837	1.14316	0.366907	0.258078	0	1.70536	0.247522	0.753065	1.57318
visC	-0.0617904	0.444452	0.306868	0.00469661	0.244959	0.0910167	0.109965	0.0725491	0.0971352	1.70477	-0.894668	0.0636554	0.321262
wcaB	0.205232	-0.0522587	-0.0848241	-0.0522587	0	-0.074549	0	-0.0224607	1.48231	1.69758	0	0.0904659	0.158549
nrfE	0.366579	0	0	0	-0.0425284	-0.110944	0.114325	0.0518607	1.11879	1.51097	0	0.644194	1.69448
dmsA	-0.506645	-1.07871	-1.17632	-1.07871	-1.22027	-1.08749	-1.10593	-1.07871	-0.204395	-1.67926	1.69414	-1.46263	-1.46263
rnd	0	0.254966	0.435385	0.254966	0.327746	0.202268	0.281927	0.254966	1.63955	1.69326	-0.158503	0.615395	0.401435
ybeX	-0.508625	0.961407	0.920596	0.961407	0.83114	0.891104	0.939669	0.961501	-0.44445	1.69302	-0.972063	1.01529	0.823725
frlC	0.0664371	0.3229	0	0	0	0	0.087979	0	0.643971	1.69089	-0.76697	0	0
lar	0	0	0	0	0	0	0	0	0	1.69057	-0.637857	0.32232	0.829193
efeO	0	0.371657	0.286904	0.283947	0.131026	0.27012	0.346962	0.283947	0	1.68905	-0.525655	0.408433	1.4369
seqA	0.1029	0.947044	0.862496	0.947044	0.780377	0.780377	0.932886	0.947044	-0.231257	0	1.68809	0.569645	0
rtcA	0.032882	-0.208921	-0.244032	-0.208921	-0.287975	-0.236143	-0.236143	-0.208921	-0.144354	-0.192138	0	-0.118776	1.68638
ybbM	-0.0621027	0	0	0	0	0.147973	0	0	0.865505	1.68593	-0.312376	0.0647308	0.0674146
livG	0.436769	-0.0473606	-0.0121688	-0.047408	0	0.392706	0.307229	-0.047408	0.814801	1.68485	-0.24627	0	0.624293
yifE	-0.439783	0.257464	0	0.041368	0	0.204852	0.0641466	0.376547	-0.107986	-0.226407	-0.484072	0	1.68476
flgN	0	0.00492603	0	0.0466173	0	0.246836	0	0.00585325	0.0560065	1.68472	-0.611379	0.284791	0
dctA	-1.41402	1.32447	1.22686	1.32042	1.68292	1.354	1.29725	1.32447	-0.933342	0.825664	-2.14731	1.15748	0.642255
mutH	0	0.175565	0.215727	0.175565	0.061444	0.144131	0.165474	0.175565	-0.0165701	-0.248538	0	0.468687	1.68071
iaaA	-0.128318	-0.138608	-0.156758	-0.138462	-0.259996	-0.184053	-0.0760319	-0.138608	-0.0702515	0.585278	-0.156009	-0.00463589	1.68045
ggt	-0.551686	0.357068	0.904462	0.36988	0.200554	0.590866	0.529515	1.53207	0.276378	1.6804	0.313684	0.782854	0.117767
yceF	0.052611	0.229947	0.160836	0.229947	0.518681	0.721455	0.302213	0.229947	-0.676051	-0.290643	-0.114512	0.0145068	1.67722
grxD	-0.444622	0.397314	0.625108	0.307138	0.224253	0.641219	0.28716	0.285987	-0.485613	1.67486	-1.15623	0.378385	0.15009
rraB	-0.113943	0.589179	0.539095	0.81916	0.78642	0.783994	0.665476	0.647642	-0.145844	1.67486	-0.887275	0.795327	1.00387
cheZ	-0.264291	-0.061107	-0.0160751	-0.061107	-0.016195	-0.0883285	-0.0883285	-0.061107	0.23512	1.6747	0	0.395554	0.734474
oppA	-0.453701	1.03036	0.945826	1.05127	1.67387	0.971483	1.02404	1.05127	-0.259298	0.117154	1.18738	0.667351	0.53433
thiC	-0.45535	0.503455	0.496754	0.503455	0.328484	1.67337	0.476234	0.503455	0.249782	1.3452	0.0663471	0.474712	1.34716
ansP	0.624404	1.67277	1.57516	1.67277	1.53121	1.64555	1.64555	1.67277	0.269744	1.26698	-1.18424	1.28885	1.28885
argC	-0.389484	0.442405	0.310911	0.400152	0.477217	0.510137	0.378681	0.400152	0.373899	1.67267	-0.589059	0.876342	1.29268
ynfE	-0.260787	0.385728	0.267668	0.385728	0.206212	0.308056	0.327927	0.296744	0	0.576528	-0.772352	0	1.6673
rbsA	-0.0702784	0.201964	0.339663	0.254596	0.0971811	0.244567	0.244567	0.254596	0.586939	1.35733	1.66384	0.187629	0.926978
fabA	0.652321	1.66153	1.33252	1.66153	1.51998	1.63431	1.63431	1.66153	0.198105	0.727419	1.39519	1.27762	0.735911
nadR	0.103389	0.610802	0.238566	0.150592	0.00903751	1.14943	0.323896	0.150592	0.550671	1.66119	0.376194	0.61273	0
yciN	-0.628387	0.316798	0.317633	0.305748	0.190784	1.65889	0.655187	0.364088	0.46808	1.48761	-0.25836	0.631541	0.596358
ybl211	-0.404105	-0.194338	-0.282604	-0.194338	-0.335892	-0.221559	-0.221559	-0.194338	0.621251	-0.62845	-0.211833	-0.182012	1.65884
pinR	0	0	0	0	0	0	0	0	0	0	0	-0.0674931	1.65861
fhiA	0.0708287	0.0638879	0.0669057	0.0605882	0.0143309	0.0220625	0.0176658	0.154272	1.40446	1.65774	0	0.471677	0
ybl210	0.0661599	0	-0.0373776	0	0.422695	0.109372	0	0	0.421759	0	0	0.0206383	1.65525
yddB	1.05983	1.654	1.55639	1.654	1.51245	1.62678	1.62678	1.654	-2.69752	0.719892	-2.25964	1.27009	1.27009
ybl187	-0.291948	-0.00158381	0.462982	-0.00158381	-0.0641308	-0.0225085	0	-0.00158381	0.341074	1.65357	-0.0680626	0.443779	0.0785213
ydiP	0.0623934	0.809748	0.0829457	0.252924	0.191564	0.233321	0.229105	0.252924	0	0.370673	0.198737	0.036066	1.65206
tnaB	0.221015	0.162667	0.12943	0.0982061	0.15694	0.313433	0.206389	0.162667	1.15247	1.64365	-0.618674	0.30891	0.996472
yfjD	-0.542031	0.709488	0.629502	0.709488	1.51336	0.704953	0.701695	0.709488	0	1.64238	0	0.406138	0.398405
valV	0.0452697	0	0	0	0	0	0	0	0.0622706	0.904627	-0.680336	0	1.64159
frmA	-0.511418	0	0.00166916	0	-0.135943	0	0	0	-0.571036	-0.269471	-0.570675	0	1.64021
ytfM	0.620649	0.255966	-0.12484	-0.027229	0	-0.0544505	0	-0.027229	1.5122	1.63902	-0.822818	0.0243722	1.21772
alaT	-0.222771	-0.85099	1.63636	-0.85099	-0.992544	-0.878212	-0.878212	-0.85099	-1.39516	-1.7851	-0.677175	-1.23491	-1.23491
torZ	0	-0.19379	-0.276427	-0.161531	-0.26685	-0.316609	-0.304857	-0.289387	0.448765	0.987007	1.63582	-0.592035	0.987662
yebN	0	0	0	0	0.0669882	1.63497	0.848677	0.49155	0	1.6132	-0.515558	0.715162	0
gcvH	0.0142135	0.115724	0.121971	0	0	0.188118	0.0805865	0.0777382	0.106645	1.63314	0	0.124436	1.1802
dld	-1.01502	0.624295	0.526684	0.624295	0.664559	0.597073	0.592206	1.63297	-0.311924	1.3174	-1.11408	0.839013	1.52386
etp	-0.187854	0.0685561	0.0492734	0.0982459	0	0.0727465	0.356024	0.0971172	-0.403208	-0.528847	-0.432922	0	1.63273
glnQ	0	0.345859	0.222825	0.637841	0.261136	0.232238	0.32813	0.455061	-0.0965486	0.418085	-0.204068	0.160859	1.63097
glnA	-0.263656	0.456944	0.423571	0.456944	0.519739	0.43107	0.43107	0.457421	0.141453	1.63062	-0.664307	0.686875	0.392492
hflD	0	0.0143611	0	0.0160327	0.28736	0.0227389	0.0336772	0.0872223	-0.494102	1.6302	0	1.12995	0.817233
yadG	0	0.620224	0.647348	0.669892	0.333578	0.588491	0.618472	0.635514	0.32886	1.63015	0.00012849	0.389282	0.0542017
malQ	0.120555	0.117854	0.351947	-0.0250036	0.165146	0.814359	-0.052225	-0.0250036	0.87722	1.25257	-0.0566036	0.388933	1.62942
ynjI	0.0560104	0	-0.0140939	0	-0.0580373	0	0	0	1.0524	1.62391	-0.347971	0.470824	0.247837
mntR	0.118577	0.332403	0.0810363	0.186448	0.0878249	0.437346	0.237163	0.186448	0.377831	0	-0.40001	0.00444294	1.62353
yheV	-0.773665	0.136292	0.200618	0.136292	0.922517	0.113607	0.113607	0.136292	-0.171742	1.62258	-0.380926	0.522058	0.153753
yheL	0.371706	0.110405	0.086275	0.110405	0	0.133028	0.0269393	0	0.102017	-0.00522161	0	0	1.62122
hofC	-0.189018	-0.164629	-0.458156	-0.164629	0	-0.331692	-0.358493	-0.312067	0.286612	1.61968	-1.03669	0.474392	-0.0498943
pstC	0	0.335267	0	0.105872	0.0254188	0.0902257	0.0902469	0.105872	-0.639161	0	-0.214746	0.398726	1.61424
gcd	0.40592	0.390555	0.200192	0.39132	0.553408	0.581419	0.3437	0.374569	-0.28101	1.6123	-1.3401	0.123391	0
yjjV	0.0614164	0	0.0968727	0	0	0	0	0	0.5402	0	0	-0.00301266	1.60988
yiiM	0	-0.00908761	-0.122081	-0.0244701	0.106983	0.00388759	0.0106376	-0.00908761	0	-0.0494673	0.277353	-0.1953	1.60935
yccF	0.566526	-0.0243406	0.274436	-0.0243406	-0.0211706	-0.0485375	0	-0.0243406	0.768069	1.60916	-0.0999607	0	0.171461
osmF	0.615889	0.470584	0.365214	0.470584	0.677894	0.443363	0.470685	0.520584	0.883336	1.60736	-0.631702	0.315917	1.52763
ydfK	0	0.320324	0.229694	0.318269	0.291732	0.29741	0.298658	0.322875	-0.353924	0	1.60626	0	0.965235
rlmD	-0.198321	-0.196176	-0.193787	-0.196176	-0.020738	-0.223398	-0.223398	1.02538	0.479105	0.586685	0.0834817	0.51239	1.60487
ycbX	-0.110007	0.407424	0.432163	0.407424	0.68311	0.382837	0.382837	0.407424	-0.258667	1.60408	0.0295218	0.809292	0.30267
tolB	0.735393	0.124754	0.0271435	0.124754	0.649867	0.0975329	0.0975329	0.124754	-0.0850275	0.523976	-1.43713	-0.259161	1.60249
gltS	-0.459388	0.917165	0.985406	0.917165	0.775611	0.889944	0.889944	0.917165	-0.621373	1.43162	-0.798179	0.835301	1.59849
dcuA	-0.408019	0.474707	0.48975	0.669123	0.58497	0.71094	0.563273	1.59495	-0.0643175	0	-0.666472	0.230443	0.916938
speC	0.785377	0.916825	0.819215	0.916825	0.775271	0.889604	0.889604	0.916825	-0.794134	0.378954	0.257031	0.929151	1.59489
rstA	0.0867531	0.321517	0.349459	0.447069	0.520181	0.359282	0.265502	0	0.00659443	0	-0.397623	0.166167	1.59487
gntU	-0.957475	0.161251	0.12792	0.32287	0.312825	0.143424	0	0.161251	0.278591	1.59363	0.138844	0.127304	1.38663
cytR	-0.402456	0.47405	0.727702	0.568749	0.430289	0.573302	0.573302	0.589527	0	0.27691	0	0.563535	1.59187
cobU	-0.0762992	0.037779	0	0	0	0	0	1.58645	0.113246	0.531934	-0.30008	0.283345	0.906568
tsgA	0	0	0.206951	0.00201208	0	0.160292	0	0.00201208	-0.00397298	0.643801	0	0	1.5821
hcr	0.0680778	0	-0.0556287	0	0.0785692	0.529763	0.0757768	0	1.48706	1.58193	-0.0174866	0.896227	1.34864
ychM	0.361282	0.0844539	0.222581	0	0.0809423	0	0	0	0.0736628	1.58146	0	0.0716941	0.647589
ycaI	-0.0601149	0.63273	0.450637	0.63273	0.514706	0.61817	0.61817	0.63273	0.442515	0.827041	1.04441	1.2781	1.57993
hyuA	-0.633139	0.103801	0.104371	0.0921468	0.0288575	0.260683	0.131435	0.641583	-0.179224	0.0590136	-0.0279792	0.32706	1.57622
ypfN	0	0	0.194987	0	0	0	0	0.00683068	0	0.863862	0	0	1.5751
prpR	0	0.0908561	-0.136095	-0.0860137	0.0511076	-0.135954	-0.0344869	0	0.302914	1.57486	-0.677439	0.615679	0.307154
ddpX	0.55942	0	0.358448	0	0.0473231	0.375731	6.33061e-06	0	0.942548	1.5743	-0.147526	0.134846	-0.0341695
bglX	1.13154	0.216671	0.11906	0.216671	0.075117	0.18945	0.18945	0.216671	-0.274721	0.839764	1.47543	-0.167244	1.5742
flgD	0.24134	0.0710977	0.0355799	0.0752868	0.0384174	0	0.0579689	0.152071	0.868785	1.57072	0	0	0
yfhG	0.390815	0.00202214	0	0.00528799	0	0.734299	0.163973	0	0.798464	1.56925	-0.418649	0.100186	0.480445
viaA	0.430787	0	0	0	0	-0.00691301	0.0984957	0	0.478812	1.56276	-0.808963	0.614963	0.228046
ybbN	-1.10391	1.08962	1.0042	1.10182	0.960261	0.953525	1.07459	1.08403	0	1.55949	-0.462023	1.153	0.0192752
ybl31	0	0	0	0	0	0.0918769	0	0.734944	0	1.55618	0	0	-0.0977406
hcaD	-0.013797	0	0	-0.260466	-0.159557	-0.435841	-0.0955226	-0.223962	0.748467	1.55615	0.0189135	0.404577	-0.507962
fadH	-0.458845	0.357434	0.251566	0.357434	0.21588	0.330213	0.47307	0.357434	1.55511	1.39866	0.411042	0.417144	0.0577251
ycgY	0.238905	-0.427667	-0.352931	-0.387365	0	-0.39632	-0.42745	-0.416676	0.971844	1.55393	0	0.119183	0
gabP	-0.451863	0.761591	1.01678	0.718449	0.601933	0.697277	0.677866	0.718449	-0.398013	1.17688	-0.0739241	0.624733	1.55277
ygdI	-0.62468	0.409311	0.351557	0.409311	0.332598	0.393205	0.393205	0.409311	-1.31193	0	-0.501821	0.235474	1.55243
yigB	-0.118777	0.0269014	0.0404017	0.082457	-0.0848757	0.387971	0.329239	0.672638	0.674597	1.5521	-0.0667459	0.193369	-0.122925
yiiG	0.0848391	-0.276883	0	-0.276883	-0.113539	-0.11447	0	-0.214057	0.450759	1.08999	-0.354996	0.141187	1.55177
slyX	-0.24543	0.477226	0.390954	0.477226	0.359149	0.880205	0.418389	0.0883738	-0.48124	0	0	0.919253	1.55154
tus	0	0.418187	0.474422	0.418187	0.430479	0.678092	0.372576	0.00136765	-0.64138	-0.139923	0.068151	0.256716	1.55043
yfhL	-0.0229211	0	0.213272	0.112773	0.178413	0	0.192311	0.112773	0	0	0	0	1.5501
yhjG	-0.121312	0.501022	0.396778	0.538919	0.808024	0.521306	0.504699	0.534827	-0.444839	-0.1578	-1.3219	0.533893	1.5474
argE	0	0.292068	0.407271	0.23573	0.0666521	0.169228	0.216176	0.23573	0.581533	1.54658	-1.6263	0	0.693098
proS	-0.429842	1.2106	1.05707	1.2106	1.06904	1.16334	1.18338	1.2106	-0.69272	1.43353	-1.20249	0.80724	1.54519
ynfD	0.147726	0	-0.0810828	0	0	-0.0200025	0.0776738	0.193351	1.35635	1.5449	0	0	0.448009
rsmF	0	0	0	0	0	0	0	0	-0.0627069	-0.429846	0	-0.174265	1.54322
eutC	0.214755	0	0	0	0	0.0411325	0	0	0.722405	1.54069	-0.224774	0.176882	0.363406
yahK	0.005816	0.374562	0.289944	0.386879	0.382776	0.350885	0.349732	0.42735	-0.131573	0	-0.756254	0.527219	1.5389
clpS	-0.172145	0.172569	0.0476705	0.172569	0.111627	0.160659	0.160659	0.172569	0.292811	1.53784	-1.187	0.183007	0.862068
accA	-0.640757	0.487864	0.473472	0.496321	0.418852	0.483554	0.519074	0.487864	-0.476782	1.53781	-0.042521	0.473185	0.184601
yiaU	0	-0.0900178	-0.228576	-0.110147	-0.159256	-0.160519	-0.194825	-0.158088	0.571044	1.21121	-0.978933	-0.03091	1.5378
yajG	-0.825527	1.50866	0.271686	0	0.0496667	0.0894346	0.0894346	0.0989029	-0.945009	0	0	0	1.53568
ydeE	1.53382	1.22317	0.927407	1.22317	1.00382	1.22579	1.20878	1.39094	-1.57907	1.40286	-1.51006	0.76329	0.65238
abgT	-0.192461	0.0653336	0	0.0653336	0.167752	0.402769	0.0141745	0.0653336	-0.967856	-0.14243	0.3199	-0.167719	1.5317
iap	0	1.53092	0.261209	0.360358	0.23493	0.46282	0.23067	0.360358	0.0874007	0.365664	0	0.260686	0
kbaZ	0	0	0	-0.000543849	-0.142098	0	-0.0262591	-0.000543849	0	-0.122178	-0.276032	0.145324	1.53052
fucK	0.393609	0.483155	0.0893126	0.113955	0.154506	0.0657543	0.0766906	0.113955	-0.410932	-0.163162	0.035733	0	1.53017
ydbH	-0.984611	0.116064	0	0	0	0.108322	0	0	-0.0841874	1.53011	-1.40975	-0.228094	0.984684
fimD	-0.26056	0	-0.223779	0.177919	-0.209227	-0.45339	-0.45339	-0.421886	-0.019632	1.5294	-0.464495	0.0592271	0.572376
yhfK	0.148108	-0.585453	-0.683064	-0.585453	-0.727007	-0.612675	-0.612675	-0.585453	1.52824	1.19454	-0.0164272	0.110095	-0.969368
ilvG	0.172065	0.74086	0.0797866	0.415697	0.531536	0.388476	0.388476	0.415697	0.141176	1.5282	-0.102344	0.564326	1.03114
yphC	-0.116473	0.268766	0.128481	0.268766	0.234318	0.233965	0.283819	0.257036	0.0901087	1.52786	-0.766228	1.05381	0
yneG	0	0	0	0.22287	0	0.345303	0	0.242771	0	0.317918	-0.674799	0.0888439	1.52666
ybhF	-0.529065	0.0130481	-0.075044	0	-0.0936148	0.272534	0.0672123	0	0	0.290578	0.268668	-0.268465	1.52558
fepA	-0.784412	1.16501	1.0674	1.16501	1.02345	1.13779	1.13779	1.16501	0.335684	1.52338	-1.95616	1.28109	0.781093
yahG	-0.116145	0	-0.0455225	-0.0962094	-0.182208	-0.123431	-0.00496788	-0.0770425	0.0972428	1.51855	-0.129753	0	0.169348
ugpB	0	-0.540923	-0.135375	-0.540178	-0.508474	-0.54948	-0.505363	-0.540178	0.370991	1.51693	0.0242249	0.202537	1.27279
pepN	-0.466155	1.22182	1.10976	1.22354	1.00788	1.19727	1.19727	1.22312	1.51682	1.38145	-1.99208	1.30497	0.696925
ribF	-0.692795	0.768892	0.671282	0.768892	0.627338	0.741671	0.741671	0.768892	0	1.51622	0	1.20834	0.384977
agaS	-0.934424	0.569372	0.124208	0.142188	0.131746	0.496985	0.132369	0.149933	0.234879	1.51462	-0.530877	0.14582	-0.0492064
yahA	-0.243635	0.160671	-0.006788	0	0	1.5145	0.0721902	0	-0.155007	0	-0.0157173	-0.0606825	1.13761
fixC	0	0	0	0	0	0	0	0.123206	0.182236	0.415481	-0.413911	0	1.51423
asnW	-1.09937	0	0	0	-0.000371237	0	0	1.5128	-0.465451	0	-0.580274	0.932165	0.00222821
putP	0.542272	1.22825	1.13064	1.22825	1.0867	1.20103	1.20103	1.22825	0.414701	1.51225	-0.402558	0.844339	0.844339
rhaB	0	-0.420831	-0.392428	-0.200403	-0.405964	-0.495557	-0.393661	-0.476025	0	0	0.105126	-0.442933	1.51007
sucD	-0.722093	0.764369	0.641601	0.73151	0.640815	1.50755	1.0087	0.245699	-0.148548	0	-0.666402	0.539202	0.743027
sapB	0	0	0.0554452	0	0	0	0	0	0	-0.327354	0	0	1.50534
ackA	-0.871913	0.51286	0.365846	0.462149	0.310335	1.50503	0.679132	0.51286	0	0.211993	-0.231316	0.341103	0.711421
cyaA	-1.23729	1.48701	1.22092	1.48701	1.39046	1.49754	1.50479	1.29238	0	0.597902	-1.63936	1.05607	0.793014
lacA	0.469758	0	0	0	0	0	-0.0121561	0	1.48715	1.50413	0	0.0331208	0.146553
dsdA	0.130958	0.5753	0.470546	0.5753	0.431148	1.25919	0.550895	0.5753	-0.284227	0	0.404736	0.260033	1.50384
ydeM	0	0.249052	0.290942	0.249052	0.284171	0.318204	0.2896	0.249052	-0.678999	0	-0.419386	0.0624536	1.50119
radA	-0.261783	-0.00062228	0.436232	0	0	0	-0.0258218	0	0.0121872	0	0.287219	0.402608	1.50035
yciQ_1	-0.148394	0.195955	0.225778	0.1865	1.50006	0.449942	0.601638	0.313493	-0.0977573	-0.09016	-0.334859	0	0
hybB	0	-0.386116	-0.33167	-0.292882	-0.410023	-0.413337	-0.354513	-0.386116	0.373201	1.49895	0.393261	0.130044	0.37301
ygiL	0	0	0	0	0.140723	0.138596	0	0	-0.0869058	0.417813	0.171971	0.284711	1.49706
bioA	0	0.412644	0.301606	0.412644	0.367389	0.405522	1.49704	0.412644	0	1.44682	-0.352238	0.556025	0.205476
pck	-0.890352	0.572884	0.445694	0.519521	0.644623	0.551079	0.549272	0.572633	-0.245348	-0.111273	-0.903158	0.392338	1.49623
yddW	0.343526	0.355601	0.23395	0.355601	0.298016	0.562753	0.330312	0.351865	1.13741	1.49527	0.442039	0.334229	0.970435
pta	0	0	1.49495	0	0.365821	0	0	0	0.763024	0.685114	-0.754021	0.33106	0.982933
hypE	0.0284022	-0.0961408	-0.0912739	0.238047	-0.0174984	-0.0340267	-0.113443	-0.102278	0	0	0	0	1.4903
ompW	0.117295	0.0261182	0	0	0.0250276	0.458747	0	0	1.48604	1.42138	-1.39666	0.276245	0.26276
ppsR	0	-0.0199058	0.156888	-0.0199058	0.149466	-0.0471273	-0.0471273	-0.0199058	-0.206071	1.48587	-0.492393	0	0
fhuE	0.471053	-0.386581	-0.684192	-0.586581	-0.328135	1.48501	-0.0138026	-0.386581	0.648245	0	-0.069897	-0.170496	0.763458
yddG	0.648858	0.424407	0.487152	0.424407	0.295051	0.443247	0.389588	0.420534	0.867684	1.48429	-0.308388	0.756617	0.75508
dapB	0	0.1863	0.217237	0.1863	0.105092	0.330866	0.363873	0.543949	-0.517961	0.502011	-0.320427	0.352396	1.48391
cobS	-0.343992	0.337805	0.461129	0.559342	0.405949	0.408606	0.529437	0	0.532371	1.03074	0	0	1.48354
degS	-0.0649948	0.06488	0.615809	0.238547	0.344168	0.0602002	0.322788	0.238547	0.5841	1.48025	-1.01368	0.526404	1.06627
ybaS	0.0769334	-0.153583	-0.173254	-0.153583	-0.13022	-0.111628	-0.073643	-0.153583	0.807524	1.47944	-0.249365	0.27564	0.246965
yfiE	0.213073	0.0470271	0	0.0529837	0.115481	0.140882	0	0.0585618	1.11337	1.09723	0.287711	0.229432	1.47891
yojI	0.0170972	-0.0688547	-0.166465	-0.0688547	0.276191	-0.0960761	-0.0960761	-0.0688547	-0.459022	-0.253263	-0.696938	-0.309913	1.47721
kdpC	0.227214	0.0202203	0.124029	0	0.228816	0	0.0557656	0	1.17059	1.47585	-0.0413174	0.0301526	0.336636
glyQ	0	-0.0819413	-0.12089	-0.0496833	0	0.409685	-0.0720081	-0.0496833	-0.202311	0.671566	-0.75505	-0.0328606	1.4754
fis	-0.911931	1.29208	0.996345	1.47438	1.22812	1.46247	1.33221	1.47438	-0.399882	0.499703	0.349768	1.10935	1.04614
ybl130	-0.477606	0	0.0498249	0	0.711612	0	0	0	0	0.0228946	0.375979	0	1.47381
yhaM	-0.971294	0.0449001	0	0.0449001	-0.0552032	0.211567	0.0176786	0.0383747	0.236393	1.47371	-0.366746	0.320474	0
ybl97	-0.173522	0.323405	0.325042	1.47231	0.148119	0.361055	0.378122	0.400715	-0.123864	0	0.603867	0.362065	0
ytfR	-0.146189	0.0827697	0.00101238	0.0324921	0.172157	0	0.0663369	0.538709	0.0117378	0.0681675	-0.363838	0.116124	1.47108
nagC	0.221102	0.400639	0.198417	0.336032	0.412006	0.676335	0.301305	0.251401	0.13974	1.4708	0.728489	1.11596	0.396907
recJ	0	0	0	0	0.0843309	0	0	0	0.492143	0.507642	-0.915291	0.827498	1.46945
ubiE	-0.17301	0.194813	0.0410777	0.151241	0	0.221737	0.235744	0.151241	-0.183311	1.46448	-0.453913	0.255033	0
sthA	0.908338	1.01992	0.561765	0.659376	0.763112	0.632155	0.62012	0.659376	1.19289	0.160747	-0.787294	0.35382	1.46428
ydiN	0.143656	0.318566	0.256757	0.317423	0.335645	1.46403	0.546801	0.317423	0.411239	0.424846	0	0	0
uxuA	-0.629177	0.284303	0.206919	0.286407	0.252052	0.269746	0.263643	0.279433	0.245523	1.46292	-0.146102	0.382016	0
ftsP	0.382027	0.10327	0.130659	0.10327	0.409836	0.0760481	0.201048	0	0.525293	1.46281	0.516904	-0.0306454	0.110433
rluA	0.485939	-1.10752	-0.473762	-1.10752	0.376557	-1.13474	-1.13474	-0.953674	1.46068	1.25281	0.298843	-0.125386	0.083882
potA	-0.815493	0.327862	0.369302	0.324085	0.051629	1.46002	0.630812	0.335055	-0.0547599	0.0226793	-0.493775	0	0
ylbE	0	0.0923714	0.0638352	0.0969977	0.00502297	0.0727119	0.0727119	0.0969977	0.222978	1.45714	0.671882	0.115634	0
ycjF	0	0.0070654	0.0189936	0.0304029	0	0	0	0.10029	0.240064	1.18725	-0.421903	0.116662	1.45632
ymcE	0	0	0	1.37275	0	1.45328	0	0	0	0	0	0	0
pyrF	-0.412602	0.5595	0.461889	0.5595	0.417946	0.532278	0.532278	0.5595	-0.43323	0	-1.2188	0.354553	1.45181
fkpA	-0.0553622	0	0.163018	0	0	0	0.0826633	1.45104	0	0	-0.456827	0	0.566884
lolC	0.835977	1.2854	1.18779	1.2854	1.14384	1.25818	1.25818	1.2854	-1.16245	1.45045	-2.17829	0.431371	0.639866
ydbD	-0.752245	1.31224	-0.128218	0	1.44954	-0.0535829	-0.0578287	0	-0.290716	-0.668896	-0.00480733	-0.403322	0.848874
ybbP	0.931195	0.0102763	-0.00575838	0.0639214	-0.0776327	0.0366999	0.0366999	0.00154912	0.918826	1.44603	-0.728399	-0.319994	0.856576
rfbD	0.437634	0	0	0	0.347602	0	0.0396273	0	1.08796	1.44485	0	0	0.80244
scpA	0.122676	-0.0150863	-0.108399	-0.0150863	0.0126476	0.627312	0.0707588	-0.0150863	0.596459	1.44462	-0.808723	0.368354	0
yfeR	0	0	0	0	0.816385	-0.00471137	-0.00471137	0	0	0	1.44408	-0.0280715	-0.361405
uvrB	-1.8971	-0.302927	-0.400538	-0.302927	-0.444481	-0.330149	-0.330149	-0.302927	-0.40652	-0.237039	1.39813	1.44373	-0.686842
fadE	0.272038	0.0385711	0	0.0385711	-0.0417787	0.0113496	0.0113496	0.0385711	0	1.4428	-0.190041	-0.0120106	-0.345344
rrfA	0.0842749	0.0749734	1.44186	0.0749734	0.183419	0.047752	0.047752	0.0749734	-0.0344911	-0.859139	-0.518736	0	0.917781
hypC	0.00993359	-0.165677	-0.227236	-0.0572258	-0.0745984	0	-0.181808	-0.226308	0.708594	1.44123	-0.166843	0	0.159145
yahJ	-0.142447	0.188134	0.0582099	0.0649648	0.121426	0.152697	0.164223	0.160256	-0.1672	1.44055	-0.390468	0.422254	-0.145839
ycdX	0	0.285219	0	0	0	0	0	0	0	1.4401	0.325646	0.0735313	-0.213123
ygbN	0.0288343	0	0	0	0.234242	0	0	0	0.193392	1.43976	0.532163	0.300603	0.319805
gudP	-0.0193406	-0.388133	-0.352417	-0.386082	-0.192668	-0.0869236	-0.0947127	0.193857	0.662209	1.4396	0.461178	0.190299	0.789097
yfcL	-0.509223	1.00352	0.717136	0.796307	0.669631	1.43935	0.828309	0.778244	-0.300161	1.1659	-1.06386	0.727316	0.0404358
bioD	-0.583521	-0.665708	-0.513319	-0.665708	-0.557262	-0.69293	-0.69293	-0.665708	0.146577	-1.09982	0.446709	-0.614129	1.43893
sdhD	0	0.0670943	0.0767753	0.092639	0.0298054	0.34396	0.0598659	0	-0.417756	0	0.0590318	0.20501	1.43888
ampD	-0.0999285	0	0	0	0	0	0	0	1.08541	1.43744	0	0.622262	0.292644
ppk	0	1.27048	1.43703	1.27048	1.12893	1.24326	1.24326	1.27048	-0.978075	1.15419	0.856663	0.88657	0.874809
yqgB	0	0.339127	0	0.306036	0.172098	0.201182	0.343772	0.306036	0	1.43698	-0.355613	0.399072	0
cybB	-0.161266	0.719585	1.43674	0.702182	0.8341	0.667144	0.805575	0.702182	-0.118775	0.0118964	0	0.407099	0.921966
ispU	-0.915752	0.453921	0.536536	0.467073	0.312438	0.539108	0.47104	0.453921	-0.498802	0	-0.840112	0.172533	1.4355
nusA	-0.335999	0.198866	0.586122	0.176295	0.0949768	0.160657	0.160657	0.176295	0.216814	1.43462	0	0.202762	0.915852
yihU	0.0410147	0.296154	0.475918	0.396943	0.426329	0.864101	0.168074	0.232484	0.308971	1.43319	0	1.40641	0
ybhO	-0.0931031	0.249763	-0.0517048	-0.00643363	0.121643	-0.0447665	0	0.817884	0	1.43317	0	0.81083	0.405164
ybiY	0.47427	0.150801	0.0603637	0.150801	0.102621	0.123579	0.170962	0.150801	0.99082	1.43149	-1.46466	0.302598	0.299466
napC	-0.135987	0	-0.0183871	0	0	0	0	0	0.246509	0.158674	0	0.02752	1.43124
hha	-0.450623	0	0	0	0	0	0	0	-0.389493	0.618295	0	-0.22503	1.43099
yciC	0.355031	0.511493	0.950878	0.531825	0.52318	0.77352	0.52547	0.605571	0.518579	1.42995	0	0.273883	0
cysZ	-0.31307	0	0	0	-0.0361703	0	0	0	-1.19628	1.42937	-1.69317	0	-0.278531
rpsA	0.92436	1.42774	1.16117	1.42774	1.33325	1.42584	1.42584	1.42774	0.265983	0.54069	0.931888	1.00725	1.09089
rarA	-1.14402	0.950898	0.876984	0.950898	0.839849	0.932098	0.932098	0.950898	0.0645576	0.998284	-0.101478	0.728914	1.42707
dbpA	-0.344423	-0.0500286	0	-0.0500286	-0.110969	-0.0716457	-0.034881	-0.0500286	0.7295	1.42697	-1.00108	0.216518	-0.351858
yehL	0.19591	-0.013867	0	-0.013867	-0.140944	-0.107037	0.146868	0	1.17591	1.42633	-0.597947	0	1.3267
rsmI	-0.132345	0.188261	0.17113	0.188261	0.0908805	0.131328	0.155636	0.1861	0.0428597	-0.245602	-1.31951	0.166083	1.42581
flhC	0.435872	1.12964	0.996284	1.12964	0.988082	1.10242	1.10242	1.08429	-0.706136	1.42225	-1.95353	0.745722	0.304713
edd	-0.481163	0.694148	0.291944	0.666639	0.549615	0.646368	0.623673	0.666639	-0.156563	0.101795	-1.47574	0.687584	1.4218
tsr	-0.173133	0.555502	0.0357221	0.0424238	0.264506	0.0152023	0.0152023	0.0424238	0.897546	1.42137	0.217265	0.100615	0
emrE	0	0	0	0	0	0	0	0	-0.0670742	0	0	0	1.42133
yhcB	0.130702	1.19712	0.497853	1.10165	0.708245	0.322497	0.555766	0.517532	0.94228	1.42021	-0.681499	0.53661	0.473562
ybl136	0.499583	-0.102518	0	-0.102518	-0.125083	-0.12974	-0.12974	-0.102518	0.173428	1.41966	0.142424	-0.0213676	0.57404
btuB	-0.00034736	0.100935	0.277431	0.100935	-0.0303362	0.0816663	0.0758323	0.100935	0.0972795	0.820658	-0.509254	0.6558	1.41857
fixA	0.292432	0.115686	0.0956437	0	0.178961	0.0564085	0.0265646	0	0.590145	1.41794	0	0.0167925	0.411577
kduI	-0.494032	-0.17816	-0.0257707	-0.17816	-0.069714	-0.205381	-0.205381	-0.17816	0.101868	0	1.41722	-0.312075	0.0560803
araH	-0.017789	0.657368	0.422581	0.371339	0.833532	0.459636	0.496426	0.691082	0.290397	0.161788	-0.551575	0.306559	1.41663
alkA	0	0.207688	0	0	0.121997	-0.0576159	0	1.20576	0	0	-0.296051	0.0429951	1.41411
rpsQ	0	0.729691	0	0.729691	0	0.70247	0.70247	0.729691	0	1.41398	-2.31889	0.478365	1.07239
bisC	0	0.441571	0.579472	0.441571	0.800017	0.41435	0.41435	0.441571	1.40932	0	0	0.390989	0
ypdA	0.319647	0.272417	0.295092	0.210167	0.174673	0.236922	0.276034	0.22624	0.750578	1.40922	0.234797	0.684047	1.15432
ycbS	-0.101273	0.281157	0.168001	0.281157	0.139603	0.253936	0.246441	0.281157	0.556662	0.611075	0.4089	0.667573	1.40801
treR	0	-0.0795111	-0.184631	-0.0795111	0.24147	-0.114242	-0.101006	-0.0795111	-0.547456	1.40798	0.948154	-0.143393	-0.470935
yfgF	-0.767515	1.40777	0.938597	1.16023	0.955436	0.914636	1.13453	1.11838	0.12458	0.542076	-0.707962	0.921797	0.0921867
recD	0.140163	0.172654	1.06979	0.172654	0.329537	0.151906	0.151906	1.40758	0.266444	0.536979	0.563109	0.726608	0
rhaM	-0.157732	0	0	0	0	0	0.0835461	0	0	0	-0.240294	0	1.40687
yccM	-0.662439	-0.138139	0.692216	-0.138139	0	-0.16536	-0.16536	-0.138139	0.500481	1.40666	-1.16506	0	-0.236339
katE	0.1029	-0.418404	-0.313584	-0.167421	-0.357374	-0.395966	-0.274967	-0.167421	-0.188978	1.40538	0	-0.718137	-0.802319
rodZ	-0.274256	-0.038901	0.270246	0.426176	-0.0355879	-0.0661225	-0.0661225	0	-0.0431324	1.40534	-1.11057	-0.224696	-0.00490971
ygcQ	0.384535	0	0	0	0	0.0818046	0	0	0.538817	1.40473	-0.123482	0	0.271749
alaW	0	0.778542	0.670358	1.17631	0.692543	0	0.83476	0.515084	-0.575945	0.511097	0	0.708175	1.40433
nrfD	-0.18804	-0.0996401	0.0613533	-0.0970016	0	-0.118871	-0.0727265	-0.0133624	0.926118	1.40424	-0.60559	0	0
ybl152	0.152706	-0.138511	0	-0.138511	-0.101683	0	-0.160873	-0.0964938	-0.268502	-0.2131	-0.455898	0.418297	1.4042
yhfG	0	0.582184	0.385251	0.573168	0.149931	0.204297	0.656873	0.573168	0.169239	1.39986	-0.211836	0.459698	0.0240585
rsxE	0	0.0443656	0.250869	0.0443656	0.0779276	0.0428748	0	0.0443656	0.210285	0.165472	-0.521331	0.0983972	1.39901
yggP	-0.300557	0.406574	0.336238	0.406574	0.251785	0.420997	0.396003	0.404854	-0.0152061	1.39598	0	0.319698	0.0242628
gutQ	0	-0.207921	0	-0.207921	0.180479	0.19936	-0.17497	-0.207921	1.12377	1.3949	-1.68641	0.56568	0.464122
ydeS	0	-0.103836	0.054641	0	-0.277006	0	0	0	-0.160481	-0.434967	0	-0.312183	1.39435
trpT	-0.521447	0	0	0	1.07635	0	1.12654	0.841358	0	0	1.39172	0.83399	1.14923
yebS	0.390022	0.5486	0.476854	0.326664	0.29378	0.23507	0.23507	0.25732	-0.255735	0.264621	-1.19048	0.160429	1.39158
nuoF	0.0640166	0.156215	0	0.156215	0.155927	0.118796	0.130346	0.156215	0.0311781	1.38984	-0.035877	0.294861	0.0100211
ydhV	0	0.183446	0.0858356	0.150449	0.17461	0.0165558	0.299082	0.183446	0	1.38974	-0.228398	0.296589	-0.127432
cydD	-0.420476	0.18441	0.125502	0.221921	0.21053	0.18937	0.145871	0.221921	0.365962	0.242968	0.223711	-0.0458553	1.38908
groL	0.228659	0.277065	0.525345	0.334513	0.284625	0.080429	0.12393	0.357151	0.339076	1.38899	-0.335919	0.360883	1.11746
fimB	-0.296348	0.0606526	0.00483241	0.00182904	0.223212	0.600468	0	0.00182904	-0.200504	0	0	-0.0779727	1.38819
rsmE	-0.42611	0	0	0	0	0	0	0	0	1.38788	-1.07281	0	0.483874
lacZ	-0.574178	0.519995	0.422384	0.519995	0.378441	0.492774	0.492774	0.519995	0.679659	0.0858832	1.38747	0.13608	0.63608
suhB	0.483707	0	0	0	0.0855387	0.388177	0.0757916	0	1.38699	0.680088	0	0.135277	0.0185977
ycbL	0	0.272041	0.0201505	0.272041	0.286884	0.253927	0.253927	0.218269	0.510552	1.3869	-0.328792	0.460376	0.672945
cpsB	-0.353496	0.0640064	0.285215	0.98432	0.373464	0.0971077	0.197108	0.124329	0.186782	0.27844	0.556873	0.0989105	1.38358
yoaE	-0.444251	0.543095	0.457686	0.543095	0.419235	0.519277	0.519277	0.543095	-0.0363291	0.660376	0.18889	1.14753	1.3835
sfmD	-0.588191	0	0.544061	0	-0.0431967	0	0	0	-0.161677	-0.725931	1.3835	-0.333121	-0.492243
yphB	-0.256383	0	0	0	-0.127089	0	0	0	0	0	-0.241117	0	1.38313
acnB	0.317445	1.25853	1.08602	1.26807	1.38046	1.11302	1.23498	1.27731	-1.0265	0.598429	-1.92938	1.03106	1.0317
miaA	-0.233264	0.383439	0.36198	0.383329	0.199319	1.37913	0.622582	0.383439	-0.804266	0	0	0.0646054	0.0817271
proQ	-0.471199	1.12498	1.02737	1.07092	0.983431	1.02239	1.02239	1.04364	-0.324581	1.37899	-0.825907	1.14272	0.94107
cyoA	-0.160687	1.37883	1.28122	1.37883	1.23727	1.35161	1.35161	1.37883	-1.53205	0.444715	-1.53482	0.994912	0.994912
glnS	-0.549293	0.297146	0.299535	0.297146	0.455592	1.37867	0.269924	0.297146	0.118102	0.0630338	-0.0683935	-0.0867691	0.171727
yicI	-0.544092	0.503498	0.401548	0.503498	0.393753	0.485026	0.423251	0.48074	1.37771	0.796183	0.247967	0.43862	0
ybdZ	-0.395444	0.0669658	0	0.0669658	0.0313479	0.215062	0.0436331	0.0669658	0.125535	0.430682	-0.31652	0.0737497	1.37767
fruK	-0.0766676	0.140302	0.0654053	0.140325	0.138154	0.289592	0.118918	0.140302	0.171746	0	-1.0097	0.0724179	1.37732
gnd	-0.388595	1.30807	1.37713	1.30807	1.16652	1.28085	1.28085	1.30807	-0.0873469	0.540626	-0.523601	0.924156	0.924156
mltD	0	0.0583144	0.121492	0.0583144	0.124355	1.37615	0.148056	0.0583144	-0.159012	-0.00637887	-0.0592381	-0.0514088	0
tgt	0.0900438	0.464332	0.310903	0.464332	0.319254	0.43711	0.43711	0.464332	-0.122901	0.841422	-1.7589	0.0804168	1.37527
nhaB	0.724045	1.18322	1.08561	1.18322	1.375	1.156	1.156	1.18322	0.448953	1.30575	-1.42813	1.13264	0.799309
infC	-0.281835	0	0	1.37454	0.307723	0	0	0	0	-0.104487	0	-0.0876283	0
yggL	0	0.289558	0.335402	0.309476	0.408408	0.142872	0.329403	0.259328	0.62004	1.37378	0	0.054743	0
rfaE	0.890609	0.22318	0.317009	0	0.23876	0.139817	0.182415	0.22318	0.599128	1.37346	-0.463936	0.0782622	0.67738
yiiE	-0.297493	0	0.00251384	0	0	0.319201	0.0406106	0	0	-0.181017	-0.620363	0.116332	1.37173
sppA	-0.450654	0	0.367122	0.199267	0.136643	0.849727	0	0.136079	0	0	-1.11239	-0.0433739	1.37087
ydcY	0	0	0	0.122858	0	0	0	0	0	0.125013	0	0	1.36921
recF	-0.213861	-0.092957	0	0.484379	-0.159037	-0.167798	0	0	-0.357436	0.224179	-0.38099	-0.0724981	1.36842
glgB	0.517934	0.526764	0.410993	0.48204	0.400419	0.497089	0.509208	0.526764	0.306054	1.36737	-1.22549	0.436773	0.7981
thiG	-0.311017	0.164955	0.15517	0.164955	0.311939	0.158509	0.0811829	0.164955	0.37786	1.36489	-0.855687	0.561415	0.248247
ybfC	0.25774	-0.374956	-0.472567	-0.374956	-0.38443	-0.402177	-0.402177	-0.374956	-0.0863458	-0.878833	-0.656338	-0.592204	1.3632
fsaA	0	-0.00345747	0.0457379	-0.0118376	0.0120463	0	-0.0358015	-0.00345747	0	-0.189036	0	-0.0992684	1.36088
proL	-0.510556	0.728393	0.397215	0.489025	0.753584	0.726571	0.960438	0.489025	-0.838035	0.366084	0	0.121511	1.36037
ybiB	-0.101485	0	0.66724	0	0.0199187	0.359347	0	0	0.828697	0.560012	0	0.149427	1.3602
rimM	-0.121052	1.1089	1.07339	1.10431	1.0131	1.3599	1.3599	1.12944	0	0.0581562	0	0.228939	0.847062
lnt	-0.0392441	0	0	0	0	0.139339	0	0	0.010696	1.35793	0.894026	0	0.741153
gadW	-0.356872	1.02916	0.931547	1.02916	0.882099	1.00194	1.00194	1.02916	-0.702336	1.35581	1.01436	0.784764	0.645243
dcuS	0.219458	0	0.878125	1.35528	0.395845	0	0.62717	0.137399	-0.273544	-0.519836	-0.199005	0	-0.158584
frvR	-0.052887	0.694286	1.3549	0.416789	0.677732	0.662758	0.667064	0.694286	1.2293	1.28595	-0.238251	0.880278	0.138018
ybl121	-0.141819	0.697479	0.81232	0.697479	0.58925	0.678922	0.678922	0.701855	-0.153895	1.35481	0	0.656979	0.950884
ybbO	0	0	0	0	0	0	0	0	0	0.456401	-1.1957	0.404739	1.35313
yggG	0.0165134	0.0486696	0.063083	0.0471334	0	0.0262561	0.0973481	0.0471334	0.213212	1.35102	-0.188714	0.688274	0.513503
nikR	0.370048	0	0	0	0.0272442	0	0.137749	0	0.99585	1.35077	0	0.336416	0.347539
ygeX	-0.527508	0.0132443	-0.0441043	0.00103435	-0.0358253	0	0	0.157658	-0.578657	-0.0387172	-0.0394502	0.0712229	1.34963
ybiI	0.0386637	0	-0.0906422	0	0	0	0	0	0	0.213204	-0.710275	0.0120316	1.34889
gspC	0	0	0.398147	0	-0.0613463	0.0450818	0	0	0.381741	0.198436	0.363331	0.0508129	1.34879
menA	0.213986	0	0	0.0399998	0	0.0382753	0.0382753	0.052477	0.78095	1.34765	0	0.540465	0
pntB	-0.106572	0.201794	0.123766	0.201794	0.080468	0.181867	0.222632	0.270953	-0.0750289	0	-0.0398659	0.733455	1.34396
norW	0.576281	0.152084	0.0544732	0.152084	0.0771965	0.191529	0.191529	0.152084	0.232542	1.34326	0.0758616	0.933184	0.795762
pflC	0.486184	0.04465	-0.0200274	0.04465	0.284515	0.616942	0.130609	0.08215	1.34143	1.01193	0.459986	0.519052	0.261587
yrfF	-0.133504	0.983302	0.990173	0.983302	1.07651	0.86025	1.05843	1.08698	0.978377	1.32169	-1.65351	1.34117	0.415543
atpC	0.234077	-0.0303699	0	-0.126109	0	-0.116294	-0.00189968	0	1.32301	1.34089	-0.492735	0.218297	0
napA	-0.689089	0.409573	0.272885	0.317697	0.231731	0.337766	0.397336	0.409573	-1.21593	1.34076	-2.86208	0.264983	0
yqeF	-0.149119	0.112206	0.0642446	0.112206	0.0170096	0.131775	0.131775	0.112206	-0.370838	1.33948	0.173877	0.306812	0.993406
wzxC	0	0.0756203	0.0561703	0.074306	0.0196384	0.0677557	0.022571	0.0756203	0.440318	1.33845	-0.433004	0.503243	0.243756
ybl98	0.0866834	1.11861	0.688466	0.573806	1.33693	0.822242	0.71731	0.746026	-0.265972	0	-0.304894	0.777976	0.645626
ompA	-0.742163	1.02703	0.929422	1.02703	0.885478	0.999811	1.33314	1.02703	-1.02219	0.759587	-0.122181	0.976451	0
rlmN	-1.09379	0.372903	0.235167	0	0.207146	0	0.00717213	0.206418	-0.126051	0	-0.855622	0	1.333
acrE	0.368204	0	-0.140549	-0.138176	0	-0.165397	-0.117778	-0.138176	1.33164	1.26373	-0.313926	-0.065664	0.0637637
cysH	-0.237611	0.387236	0.523608	0.511304	0.382293	0.473836	1.33104	0.511304	-0.322297	0.44741	-0.109838	0.237356	0.113391
hflX	0.271475	0.419719	0	0.420732	0.105013	0.466028	0.522418	0.419719	0.429589	1.32977	0	0.279056	0
ulaA	0.114199	0.672279	0.750826	0.674457	0.874924	0.596267	0.472571	0.689863	0	0.0298598	-0.287572	0.658395	1.32819
cysP	-0.364579	0.490156	0.379557	0.49009	0.513782	0.435539	0.521293	0.490156	0.0344185	0.985259	-0.156718	0.484317	1.32679
rsxC	-0.719265	0.363553	0.260302	0.363553	0.151534	0.302765	0.201017	0.268118	-1.01847	-0.222881	-0.330735	0.131334	1.32654
galP	-0.795791	0.695975	0.598364	0.695975	0.637754	0.668754	0.752087	0.695975	-0.434738	1.10498	-0.474304	0.69414	1.3263
ygjQ	0.291877	0.194496	0	0.0889863	0	0.0988382	0	0	0.723585	1.11792	0.324712	0.133756	1.32616
aer	0.286534	0.428791	0.0433103	0.0827898	0.286629	0.0625183	0.0573889	0.155455	0.379938	1.32555	-0.0572707	0.00400835	1.03906
fre	-0.509584	0.743258	0.878396	0.896673	0.829863	0.87559	0.872623	0.942837	-0.632071	1.28078	-0.272953	0.771877	1.32531
yfaT	0	-0.154492	-0.173771	-0.154492	0.118294	-0.121108	-0.103381	-0.154492	0	-0.0653993	-0.479786	-0.109015	1.32514
hydN	0	-0.170206	-0.296016	-0.344557	-0.172782	-0.371106	-0.236046	-0.263956	1.0285	1.32491	-0.154258	0.0591018	0.0150657
yfaU	-0.0466617	0.266657	0.249191	0.463575	0.462615	1.32432	0.445636	0.240381	-0.392091	0	-0.778322	0	0.23714
abrB	-0.704253	0.0836285	0.161713	0.0836285	0.171192	0.117569	0.48304	0.0836285	-0.434079	-0.240055	0.577256	-0.0378852	1.32344
ispG	0.211624	0	0	0	-0.105959	0.980145	0	0	-0.147528	0	0.26834	0	1.3218
trpL	-0.0730721	0.027316	0.0967808	0	0	0.48107	0	0	0.17911	1.32154	0	0	1.00402
ttcA	0	0.128346	0.0697475	0.128346	0	0.08681	0.105558	0.128346	0.19102	1.15248	-0.663868	0.387788	1.32151
yejF	0	0	0	0	0	1.31973	0.179654	0	0	0.283022	-0.481012	0.444164	0.247888
cueO	0	0.241891	0.159275	0.280958	0.470421	0.135597	0.23709	0.381288	0.384313	1.31867	-0.848716	0	0.00970469
ilvD	0.0415658	-0.148093	-0.023482	-0.148093	-0.0674254	-0.175315	-0.175315	-0.148093	0.485545	0.156695	0.0357516	1.31861	0.490825
allS	0	0.159174	-0.0800837	0	0.0431312	-0.0351401	0	0	0.375573	0.606719	-0.357429	0	1.3177
ydfZ	0.115339	-0.0901039	-0.131168	-0.0747322	0.137798	-0.108546	-0.132941	-0.0530669	0	1.31744	0.680836	0.163851	0.0304827
yeaJ	0	0.636421	0.508549	0.339276	0.743154	0.557891	0.707723	0.609546	-0.362423	0.74045	0	0.490503	1.31448
tyrT	-0.186314	1.31407	1.21947	1.23398	0.821732	1.22635	1.20609	1.31407	-0.668217	0	0	0.241882	1.04187
mliC	-0.301775	0	0	0	0	0	0	0	0	1.31406	0	0.0653342	0.954478
lysS	0.00551369	-0.0743925	-0.172003	-0.0743925	-0.210642	1.31333	0.0880096	-0.0743925	-0.0127381	0	-0.904407	-0.124974	1.21657
sdsP	-0.183083	0.249798	0.281183	0.249798	0.0864763	0.458572	0.214445	0.249798	0.159016	0.163562	-0.549553	0.112085	1.31273
feaB	0.301866	0.572578	0.604721	0.556852	0.550705	0.547088	0.535205	0.506065	0.117002	1.31194	-0.810815	0.36282	1.04798
yadD	0.0872716	0.32311	0.369188	0.324258	0.230146	0.334265	0.378909	0.319378	0.843384	1.31152	0	0.516855	0.424094
sulA	-2.08117	1.31117	1.21355	1.31117	1.16961	1.28394	1.28394	1.31117	-1.4472	0.377053	-2.08549	1.12725	0.92725
ynjB	0.244028	-0.158229	0	-0.158229	0	-0.203681	-0.17099	-0.158229	0.231078	0.22866	-0.970711	0	1.31078
yhaC	0.292371	-0.280848	-0.0822018	-0.208999	-0.213029	0	-0.268416	-0.252047	-0.281519	-0.580991	0.825862	-0.0721701	1.31032
citD	0.0111976	0	0	0	0	0	0	0	-0.118368	0.229018	0.478664	0.0230638	1.3101
eutB	0.156714	-0.127949	0.57253	-0.127949	0.0151424	-0.155171	-0.155171	-0.0510261	0.314076	1.30997	-0.291753	0.434705	0.296738
amn	0.156489	0.235433	0.499197	0.235433	0.421949	0.208211	0.208211	0.00830031	-0.704707	1.3063	-1.10979	0.518838	0.590131
eutR	0.219061	-0.125952	-0.0389221	-0.125952	-0.0114369	0.92105	0.107685	-0.125952	0.082334	1.30613	0.42711	0.0118033	-0.140586
wcaC	0.470695	0.3371	0.298312	0.3371	0.305782	0.309878	0.297092	0.329731	0.878812	1.30262	-0.606619	0.607549	0
ybl139	0	0.0147957	0	0	0.219172	0	0.093686	0.613307	0.977353	0.792706	0.439773	0.540065	1.30253
narK	-0.201007	0.215556	0.953598	0.215556	1.02467	0.188335	0.188335	0.215556	1.12588	1.30124	-1.15393	1.12549	0.781127
ycfT	-0.204729	0.262049	0.800802	0.262049	0.976279	0.234827	0.234827	0.262049	1.30041	1.03086	-0.681752	0.294949	-0.121866
ydjH	-0.213604	0.878327	0.400586	0.498835	0.355551	0.45931	0.480502	0.504758	0.192378	0.0942405	-0.317216	0.186958	1.29986
yihR	0.240722	0.00376927	-0.133221	-0.0356104	-0.129545	0.429648	0.0758027	-0.0356104	0.606422	0.273792	-0.0958776	-0.0304813	1.2995
hycC	-0.23326	0.204373	-0.159751	-0.0621397	-0.203694	-0.0893612	1.29904	-0.0621397	0	0.765147	0	0.151189	0.467881
cutC	0.641356	0.0476662	0.0109022	0	0	0	-0.0235028	0	1.29854	0.0847151	-0.729728	-0.0412676	0
dhaR	-0.674442	0.106635	0.00902462	0.916079	0.950749	0.0794139	0.0794139	0.106635	0.829854	0.873489	-0.554254	0.574204	1.29741
grxA	0	0.294776	0.421996	0.31987	0.152544	0.259262	0.290057	0	-0.41323	0	0	0.167599	1.29739
treC	-0.0430866	-0.428098	-0.211558	-0.428098	-0.256605	-0.458448	-0.3696	-0.428098	0.307169	0.964288	-1.11912	-0.421586	1.29602
yddV	0.128418	0.0915987	0.404123	0.0915987	0	0.214675	0.0664791	0.140167	-0.212782	1.29459	-0.785223	0.378538	0.364954
rsmC	0	0	0.0313965	0	0.338589	0	0	0	-0.656493	0	-1.16015	0.156275	1.29322
ycfP	-0.9013	0.272494	0.204432	0.0779954	0	0.0598981	0.0493033	0.0836242	0	1.29273	0	0.17653	0
ybl178	0.154665	0.051472	-0.193495	-0.193913	-0.098761	1.29152	-0.0610882	-0.0293557	0.260873	0.5849	-0.390534	0.35807	0.884568
zwf	0.0327059	1.23571	1.16045	1.23571	1.29144	1.21303	1.20444	1.23571	-0.576267	0.288135	-1.04886	0.887849	0.75437
araB	0.541333	-0.103312	0.118198	-0.119564	-0.229585	-0.12969	-0.139889	-0.102153	1.19188	1.29125	0.0517484	0.603599	-0.184672
fhlA	0.225436	0.539189	0.431568	0.45984	0.397635	0.511968	0.511968	0.539189	-0.213893	1.28993	0	0.372793	0
gmr	0	0	0	0.0997234	0.226119	0.0833905	0	0.0997234	-0.867648	1.28789	-0.514403	-0.0159989	-0.0159989
prc	0.552259	0.573543	0.475933	0.573543	0.431989	0.546322	0.546322	0.573543	1.00123	1.28567	-2.3401	0.77011	0.439628
gpmM	-0.695994	0.540042	0.419323	1.28419	0.576865	0.482506	0.520817	0.538587	0.246154	0.923175	0	0.5294	0.255166
ssuE	0.310386	0.144473	0.0183855	0	0	0	0	0	0.968804	1.28322	-0.579636	0.254714	0
wcaA	-0.119231	0	0	0	0.0629906	0	0.108679	0.0626289	0.148719	1.24802	-1.0097	0.316464	1.28236
frc	0	0.003122	0.150516	0.0429606	0	0.0191159	0	0	-0.088517	-0.193963	0.350147	0.206525	1.28117
yrhB	0.417761	0	0	0	0	0	0	0	0.67682	1.27966	0	0.188099	0.0026455
accB	-0.480848	0.447988	1.19862	0.468678	0.302516	0.42087	0.442989	0.468678	-0.302859	0.0763399	0.476761	0.461296	1.27948
yraN	0.109348	0	0	0	0	0.0230315	0	0	0.3779	0.832549	0	0.0578391	1.27937
sdhC	-0.583639	0.558591	0.536141	0.58639	0.555482	0.703729	0.528519	0.662003	-0.435401	1.27904	-0.392681	0.237922	0
wza	0.252993	-0.142801	0.0805985	-0.142801	-0.228883	-0.155773	-0.154014	-0.142098	0.29161	1.27683	-1.16662	-0.208549	0.690708
cspG	0.05467	0	0.0144262	0.303818	0	0.316676	0.0774135	0	-0.083276	0	-0.54787	-0.0481696	1.27641
yqfA	-0.21625	0.000772484	0.00362194	0	0	0	0.0309117	0.000772484	0.32082	1.27618	-0.338641	0.100597	0
yijP	-1.95873	1.25685	1.27497	1.25685	1.12817	1.23211	1.23211	1.25685	-0.50598	0.00165079	-1.90668	1.02148	0.727768
tyrU	0	0	0	0	0	0	0	0	0	-0.0586796	-2.10913	0	1.27305
prfA	-0.362319	0.435716	0.500238	0.489944	0.425313	0.447201	0.460878	0.475501	-0.182662	0.886946	-0.441597	0.503716	1.27269
betI	-0.127447	-0.067309	0	-0.067309	0.020194	-0.0945305	-0.0945305	-0.067309	0.095076	1.27216	0.393504	0.443838	0
cynR	-0.679128	0.084152	0	0.0842336	0.266188	0.00975453	0.118741	0.0828755	-0.493791	0.677116	0.203084	0.0271057	1.27111
yqjA	0	0.141464	0.316943	0.380091	0.0477871	0.117524	0.15465	0.134292	0	1.2711	0	0.0949768	0
yqgE	-0.148911	0.0984834	0.574085	0.478016	0.377094	0.566309	0.500937	0.52602	-0.307764	1.27104	-1.37447	0.731712	0
ybl227	0	0.126817	0.390945	0.126817	0	0.110066	0.110066	0.126817	1.27076	1.1927	1.26828	0.318384	0.482604
fdoG	-0.437399	1.12593	0.986965	1.12593	0.951159	1.08722	1.09871	1.12593	0.0124895	0.191816	-1.4256	1.27033	0.335738
hda	-0.0222034	0.955177	0.807887	0.843092	0.882765	0.994684	0.782385	0.757906	-0.880021	1.26977	-2.28346	0.92323	0
proK	-0.626554	0.615701	0.617202	1.19485	0.550198	0.593723	0.593723	0.615701	-0.377249	0.369538	-0.703053	0.851602	1.26946
leuD	-0.0310344	0.38823	0.321267	0.329942	0.551036	0.253868	0.415404	0	0.142821	1.26932	0.163076	0.35933	0.308922
fadR	-0.62668	0.910578	0.812967	0.910578	1.26902	0.883356	0.883356	0.910578	-1.47624	0	0	0.526663	0.126629
lysP	-0.317154	-0.399803	-0.364081	-0.399803	-0.408024	-0.134204	-0.27223	-0.399803	0.0217421	1.26863	0.342825	0.357696	0.357744
yhfX	-0.417613	0.00533773	0.145961	0.00533773	0.134429	0	0	0.00533773	0	0	0	0.287402	1.26722
yacH	0.633252	-0.00927498	0	-0.00927498	0.241236	0.176006	0	-0.00927498	0	1.26658	-1.46171	0.651816	0.970963
ybhS	-0.1772	0.030936	0.108935	0.320302	-0.0824608	0.121004	0	0.533583	0.674127	1.26598	-0.246061	0.150618	0
kdpF	0	-0.175273	-0.200124	-0.175273	0.483701	-0.20111	-0.133314	-0.175273	0.134205	0	-0.353182	-0.25419	1.26522
sufAB	0	0	0	0	0	0	0	0	0.0257591	0.448022	-0.334426	0	1.26497
pgi	0.140603	0	-0.0922428	0	0.592564	0	0	0	0.280134	0.302138	-0.439675	-0.319587	1.26398
nuoB	-0.0732238	0	0.0506485	0	0.39821	0	0	0	-0.198799	0	-0.598677	0	1.2615
proX	0.436384	0.0818209	0	0	0	0	0	0.010936	0.892257	1.26145	0	0.182174	0.202021
yoaC	0	0	0	0	0	0	-0.137617	0	0	0.60414	0	0.153356	1.26143
flgK	-0.143206	0.12263	0.0640639	0	0.0856428	0	0.103272	0.12263	0.674973	1.26139	0	0.467515	0.51323
aroF	0.126274	1.26136	0.330529	0.38263	0.36981	0.37055	0.362838	0.386249	-0.642567	1.07666	-0.619858	0.250096	0.259643
ybiA	-0.0461162	0	0.132398	0	-0.0603639	0	0.407979	0.0208211	0.732218	1.26128	-0.524139	0.118397	0.825145
rsxA	0	0.738394	0.638144	0.738394	0.212034	0.557111	0.15012	1.031	-0.488444	0.111235	-1.01309	0.407914	1.26125
yphD	0.1881	0.283555	0.507593	0.283555	0.471249	0.323345	0.311615	0.345139	0.04082	0.248305	0	0	1.26104
hyaC	-0.054108	-0.153467	-0.227262	-0.278613	-0.402443	-0.340689	-0.273409	-0.250925	0.567353	1.26033	0	0	0
narQ	-0.396268	-0.396699	0.215028	-0.396699	-0.466825	0.342238	-0.310709	-0.396699	-0.0811944	0.581739	-0.709903	-0.10036	1.25806
glpK	0.0718986	0.465357	0.368527	0.464343	0.763183	0.441857	0.441857	0.464027	-0.863512	1.25716	0	0	0.161878
rluD	0	0.0761278	0.687014	0.0751609	0.156204	0.0685499	0	0.0748653	0	1.25688	0.371734	0	0
gltI	0.0756987	0.474054	0.367216	0.474054	0.422725	0.457165	0.457165	0.474054	-0.839429	0.048082	0	0.206662	1.25612
ygjV	0	0.115456	0.0632234	0.0618459	0.221341	0.0395439	0.016969	0	0.881396	1.25578	-0.713051	0.298614	-0.262304
galR	0.139153	-0.110569	-0.106901	-0.107242	0.293508	-0.126571	-0.126571	-0.107242	1.25463	0.176784	0.737355	0.290982	0.383295
pqqL	-0.522658	-0.544113	-0.641723	-0.544113	-0.352333	-0.571334	-0.571334	-0.544113	-0.643726	-1.47822	1.25264	-0.928028	-0.594694
dksA	-0.460985	0.583425	0.741552	1.07138	0.885848	1.16818	0.585368	1.25228	-0.184634	1.13058	0	0.523311	0.675646
nhaA	-0.0931756	0.335274	0.237663	0.311319	0.277053	0.295991	0.308052	0.335274	-0.872423	0	-0.600398	0.0346922	1.25159
hypD	0.287148	-0.434886	-0.430955	-0.556625	-0.566751	-0.559567	-0.442833	-0.385342	1.03358	1.25062	-0.579472	0.279849	0
tap	0.0339872	0.0766813	0.0853649	0.0766813	0.00759721	0	0.0412661	0.0766813	0.626397	1.2493	-0.616423	0.468427	0.0541461
yicN	-0.247906	0	0	0	0	0.030156	0	0	0.193767	0.135406	0.00475218	0.109187	1.24899
clcA	-0.121226	0	0	0	0.391537	0	0	0	0.605606	0.915037	1.24867	0.161936	0
yihT	0.0042934	0.213967	0.370022	0.159116	0.309028	0.117851	0.261254	0.247671	0.555156	1.24627	-0.111322	0.0926576	0.218857
cydB	0	-0.337911	-0.435522	-0.254492	-0.221208	-0.145663	-0.0680875	-0.337911	0	0	0	-0.271426	1.24514
fecC	0.307909	0	0.333932	0	0	0	0	0	0.236633	0.672724	-0.0080855	0.138318	1.24457
cbl	-0.399947	0	0	0	0	0	0	0	-0.585963	-0.226277	-0.400236	0	1.24358
yneL	-0.560239	0.000154652	0.189785	0.200201	0.0578731	0.0834525	0.164521	0.190822	-0.603573	0.0792638	-1.01922	0.143811	1.24239
yihF	-0.3406	0.071861	0	0.071861	0.0178577	1.24054	0	0.225878	-0.00348726	-0.366982	0.39048	0	0.078257
gsk	0	0.300288	0.399428	0.347832	0.427848	0.321607	0.383915	0.336057	0.145484	0.225539	-0.686741	0	1.23938
fruA	0.00727836	0.348766	0.285078	0.348558	0.46031	0.607084	0.335603	0.348766	0.220945	1.23937	0	0.34656	0.907406
phnI	-0.145248	0.0558378	0.28081	0.0603615	0.0261606	0	0.00370026	0	0	1.23872	0	0.481194	0
serS	-0.691288	0.32586	0.234409	0.32586	0.19356	0.300206	0.300206	0.32586	-0.811906	0.32049	-2.00069	0.210444	1.23844
rffH	-0.0792692	0.40592	0.333268	0.335634	0.265306	0.334974	0.289871	0	0	1.23786	0	0.768225	0
yegT	0	1.23585	1.13824	1.23585	1.0943	1.20863	1.20863	1.23585	-0.0151438	0.301741	0	0.851938	0.527552
yejO	-0.238366	0.208347	0.388019	0.387011	0.242504	0.160407	0.0100377	0.387011	0	0.166004	1.23572	0.281917	0
flgL	-0.331441	0.271963	0.193874	1.23556	0.348544	0.523714	0.250736	0.271963	0	-0.183902	-0.0132394	0.10642	0.183967
ydcS	0.633758	0.175202	-0.13806	-0.090449	0.0544125	0.173874	0	-0.090449	1.13126	0.891086	0.356062	0.440268	1.23235
ybaK	-0.218701	0.0307842	0	0.00664491	0.170223	0	0	0.0307842	0.177852	1.23125	0	0.514436	0.700648
mtlA	-0.969495	0.682387	0.60898	0.532848	0.97249	1.23092	0.634675	0.697304	0	1.04701	-1.03175	0.190072	0.467452
ycaN	-0.139072	0.63198	0.534369	0.63198	0.490426	0.592106	0.654758	0.63198	-0.198787	0	0	0.348065	1.23028
fabB	-1.31684	0.337382	0.386659	0.363889	0.154686	0.299401	0.311161	0.338412	-1.48606	1.22929	-1.97793	0.27719	0.383437
mlrA	0.18739	0	0.045759	0	0	0	0.00822597	0.00165538	0.654319	1.22879	-0.950416	0.155147	0.607139
yeiR	-0.173199	0	-0.0124912	0	0	0	0	0	-0.0595553	-0.848992	0.0157438	0.116971	1.228
erfK	-0.769524	0	0	0	0.798813	1.22673	0	1.14632	0	1.12495	-1.03	0	0
rhaD	-0.017173	0.494468	0.474607	0.494468	0.503469	0.474197	0.452785	0.494468	0.570519	1.22576	0	0.542794	0.0812027
kbl	0	0.406276	0.557216	0.392966	0.570788	0.277852	0.235025	0.394782	-0.227841	1.22325	0.444846	0.583802	0
yebA	0	0	-0.0101132	0	-0.0540565	0	0	0	-0.0946852	1.22316	-1.07409	0.154736	0.431044
nupG	-0.294776	0.7424	0.995709	0.7424	0.798966	0.715179	0.715179	0.7424	-1.05317	0.506408	-0.0104853	0.358485	1.22185
kptA	0	0.0217548	0	0	0.0448161	-0.0297868	0	0	0.188904	1.2216	-0.0278178	0	0.186177
htpX	-0.0568587	0.496492	0.394044	0.623436	0.420195	0.399596	0.473972	0.496492	0.0833391	0.0684999	-0.0431588	0.724702	1.22097
argB	-0.164998	-0.106792	-0.0867557	-0.103984	0.0322144	-0.129648	-0.134013	-0.103984	0.876525	1.22084	0.202767	0.110258	0
efeB	-0.473319	0.00659511	0	0.0354324	0.0565975	0.0227781	0	0.0354324	0.736025	0.964203	-1.00006	0	1.22082
zraS	0.0484128	-0.510617	-0.29688	0	-0.0952006	-0.439177	-0.430589	-0.513134	0.667106	0.699105	-0.266051	0	1.21971
clpX	-0.475433	1.2186	0.882018	1.2186	0.947788	0.587918	1.19137	1.2186	-0.268758	1.069	-0.172466	0.976144	0.993749
eno	0	0.805208	0.707597	0.805208	0.637492	0.511399	1.21844	0.805208	-0.587992	0	-0.478	0.493102	0.0932181
ptsP	-0.347831	0.101589	0.00397836	0.101589	0.460035	0.0743677	0.0743677	0.101589	0.327478	-0.332523	-3.01958	-0.282326	1.21767
rtcR	-0.967317	-0.0816006	1.21703	-0.0816006	0.0268453	-0.0880929	-0.0571338	-0.00977887	-0.0291274	-0.185231	-0.893417	-0.403279	-0.465516
wcaD	0.427163	-0.0308199	-0.157809	-0.0308199	-0.0716305	-0.0410626	-0.0629804	0	0.619926	1.21697	0	0	0.241671
amiC	1.16562	0.486908	0.399324	0.486908	0.576299	0.463328	0.463328	0.489742	0	0.204152	-1.65423	0.294052	1.21689
menD	-0.0277518	1.21295	0.910945	0.314565	0.231965	0.3645	0.3645	0.391722	0.900425	0.198188	0.973097	0.825134	0.80672
rtn	0.0985581	0	0	0	0	0	0	0	0.156669	0.24816	-0.68123	0.259961	1.21284
yjeT	0.0577728	0.487609	0.295242	0.502417	0.457057	0.464288	0.531907	0.487609	0	1.21269	-0.484909	0.856818	0.45309
cysJ	0.376549	0.486524	0.553304	0.636904	1.12983	0.20934	0.61639	0.636904	0.818447	1.13561	0.704116	1.21259	0.700156
gnsA	0	0.364412	0	0	0.28949	0	0.291627	0.364735	0.105122	1.21238	0	0.610708	0
yjeK	0.260326	0.595231	0.591671	0.585406	0.444429	0.516125	0.397379	0.595231	0	0.367022	-0.572304	0.431451	1.21214
ycdT	1.21074	0	0.361133	0	0	0	0	0	-0.547728	0	-0.0251488	0.196051	-0.0121273
astA	-0.0598967	0.0424465	0.522997	0.0424465	0.182612	0.015225	0.0818917	0.0424465	0.271958	1.21065	-0.615665	0.138439	0.22063
ybl144	-0.544417	0.449904	0.352294	0.449904	0.375017	0.154026	0.343755	0.449904	-0.968384	-0.350874	-0.708653	0.168505	1.20986
caiA	-0.294235	0.379898	0.307377	0.363436	0.170593	0.308282	0.368111	0.557429	-0.668315	-0.299162	-0.324949	0	1.20974
hemL	-0.0701968	0.204044	0.423487	0.213383	0.0956817	0.227042	0.230471	0.243343	0.210666	0.543962	-0.309215	0.204104	1.20941
ydfQ	0.164341	0	0.0123815	0	0	0.528014	0.0148273	0	1.20854	0	0	0.116651	0
pheM	-0.503745	0	0	0	0	0	0	0	-0.563237	0	0	-0.0105767	1.20767
speF	-0.3235	0.516097	0.387847	0.516097	0.88535	0.495227	0.484116	0.516097	0.725572	1.20683	0	0.373632	0.939783
wcaM	-0.19758	0.146596	0.224485	0.791591	0.489106	0.096254	0.118965	0.146596	0	0.0946426	0.479436	0.453632	1.20233
aroK	0	1.1383	0.993001	1.19692	1.00065	1.20208	1.16664	1.19676	-1.96412	0.300705	-1.30722	1.12312	0.715305
purF	-0.790244	0.448481	0.271662	0.44364	0.411703	1.20168	0.528645	0.299483	-0.442196	0.0814292	0.466139	0.395876	0.054631
cpsG	0.39708	0.301614	-0.451501	-0.107689	-0.534442	-0.708238	-0.641572	-0.681017	0.45975	1.20159	0.266171	-0.227449	0.308483
uspE	-0.769815	0.726326	0.631658	0.726326	0.637113	1.052	1.11734	0.726326	0	1.00593	0	1.20084	0.41177
ybl147	-0.190676	0.0620022	0.061186	0.0607452	0.707012	0.0693034	0.187783	0.0601632	0.611055	1.1997	-0.411751	0.38173	0.380257
ygfB	0.345323	0.238267	0.120449	0.210552	0.0798864	0.185424	0.185424	0.210552	0.42352	1.19969	-1.52141	0.105597	0.657275
caiT	0	0.0930032	0.182608	0.165433	0.391105	0.288339	0.225093	1.19962	0	0.475419	-0.505986	0.624924	0.187372
sdsR	-0.20277	0.294248	0.236638	0.294248	0.137022	0.48272	0.261173	0.294248	-0.261021	-0.281012	-0.388732	0	1.19958
citE	-0.0155368	0.148091	0.0515635	0.150771	0.0568356	0.123549	0.171168	0.150771	0	1.19935	-0.0325501	0.332418	0
yfaW	0.0364598	0	0.133215	0	0.0958073	0.448839	0.00375281	0	0.247728	1.19925	-0.73338	0.422881	0.612995
ydcK	-0.777138	0.00477007	0	0.110464	0	0.516122	0	0.0923342	1.00912	0.217952	0	0.122189	1.19881
pulG-3	0	0.292227	0.232812	0.292227	0.29302	0.275657	0.388047	0.390419	0	0	0	0.0185597	1.1988
yidR	-0.590631	0	0	0	0.0320856	0	0	0	0	0.442306	1.19839	0.0261839	0.227362
cadA	-0.227763	1.01674	0.659447	0.594231	0.437335	0.571479	0.556553	0.594231	-0.927718	0.117104	-1.52388	0.763058	1.19668
glyS	-1.3667	0.3495	0.587982	0.345748	0.207946	0.219857	0.322279	0.3495	1.19607	-0.334612	-3.37539	0.215585	1.07324
matC	-0.439475	-0.275362	0.0169774	-0.24893	-0.250573	-0.13624	-0.328534	-0.275362	0.396091	0	-0.176657	0.499816	1.19567
ybl132	-0.085638	-0.0163411	0.454817	-0.0163411	0.396933	-0.0995867	-0.0644597	-0.0163411	-0.123323	-0.0376192	0	-0.027313	1.1936
ygfS	0	-0.076031	0	-0.0375695	0	0	-0.0647909	-0.076031	0.545358	1.19221	0	-0.190715	0.213168
djlC	0	-0.0908622	0	-0.0908622	0	-0.115252	-0.122253	-0.104181	0.129725	0.226453	-0.541486	0	1.19121
nudC	0.0236007	-0.233239	-0.0955755	0	0.0332915	0.183854	0	0	0.598353	1.19097	-0.0974347	0.0571002	0
yqjG	0.056865	0.246074	0.578008	0.225039	0.320636	0.228037	0.239503	0.317299	0.286522	0.341703	-0.512869	0.241145	1.19078
hemA	-0.655967	-0.371696	-0.438482	-0.371696	-0.543458	1.1902	-0.0745318	-0.371696	-0.212677	-0.280246	-0.0553261	0	-0.452486
hisS	0.418022	0.708954	0.611344	0.708954	0.5674	0.532592	0.681733	0.708954	0	1.19011	-0.902579	0.467896	0.0574196
ybaE	-0.30709	0.254791	0.552872	0.0568148	0.0480287	0.221909	0.239453	0.254791	0	-0.0617072	0.384942	0.382469	1.19008
udk	-0.351928	0.0214359	0.141605	0.198603	0.258315	0.198639	0.200822	0.222315	-0.103602	0.82888	-0.470203	0.278673	1.1895
arsC	-0.171841	0	0.00419504	0	0	0.00766095	0	0	0	1.1875	0	0.014118	0.101621
yihM	0.164885	0	0.134634	0	0	0	-0.00108234	-0.178757	-0.142169	-0.253134	0.424188	-0.104368	1.18725
ybiV	-0.0533004	-0.5277	-0.579857	-0.5277	-0.479713	0	-0.509467	-0.5277	0.379182	-0.0692135	-0.340792	-0.298349	1.18674
murE	-0.0812908	-0.229657	-0.327268	-0.229657	-0.253564	-0.139232	-0.198055	0.299318	0	1.18657	-0.202327	0	0.0228399
srmB	0	0.711559	0.84709	0.710708	0.560226	0.67093	0.691056	0.709911	0.471169	1.18592	-0.797983	0.47188	0
mdlB	0.0665582	-0.0459267	0.221595	-0.0459267	-0.0289846	-0.0731482	-0.0731482	-0.0459267	0.771146	1.18532	0.114238	0.198699	0.205544
gspE	-0.0951443	0	0.160265	0	0.0598277	0	0	0	-0.37184	-0.38262	0	0.027038	1.18515
betT	-0.169812	0.219962	0.219074	0.233351	0.168399	0.0799212	0.200114	0.233351	-0.421059	-0.189987	-0.532922	0	1.1851
yoaA	-0.679442	0.037343	-0.0337904	0.037343	0.121609	0	0.19826	0.037343	0	0	-0.974472	0.172785	1.18502
yccX	0	0	0	0	0	0	0	0	0	1.18494	-0.383503	0	0.112719
sad	0	0.0583294	0.124648	0.194868	0.0655036	0.767297	0.0940476	0.200443	-0.111927	1.18412	0.118764	0.174664	0.32477
cpdB	-0.0647347	0.370799	0.347557	0.39886	0.18114	0.379703	0.607351	0.335102	0.145519	1.18402	-1.88352	0.797058	0.587435
mepA	0.858902	0.0667067	0	0.13355	0.328679	0	0.104787	0.236151	0.809938	1.18342	0	0.032673	0.447139
ribD	0	0.259669	1.18254	0.959416	0.130215	0.167594	0.347191	0.356782	0.22842	0.834715	-0.130913	0	0
mazG	0	0.0762703	0	0.0810957	0.0252037	0.014963	0.054963	1.18145	-0.221485	0.495855	-0.605747	0.259368	-0.028959
rob	-0.575973	0.0291996	0.227657	0.0109676	0.477544	0	0.0334461	0.0291996	-0.662968	1.17891	-0.782953	0	0.118967
yiaY	0.418004	0.000418878	0.138279	-0.0069521	0.0350624	0.0378427	-0.0341736	0.48405	1.17733	1.0367	-0.149192	0.403688	0.611585
hdfR	0	0.960441	1.12029	1.17654	0	0.985832	0	0	-2.02563	0.283793	0	0	0
amiB	0	0.599897	0.502287	0.599897	0.354862	0.422177	0.565138	1.17647	0.834398	0.124534	-0.429202	0.348063	0.906907
grpE	0	0.945652	0.859467	0.945652	0.672504	0.907696	0.919543	0.945652	0.256665	1.17628	-0.880816	0.371821	0
rssB	0	0.59464	0.465427	0.585895	0.64105	0.567628	0.567157	0.59464	1.01367	1.17479	-0.754934	0.189687	0.757661
insJK-2	0	0	0	0	0	0	0	0	0	0	0	0	1.17448
yjeJ	0.402618	0	0.0184418	0	0	0	0.285763	0	1.17309	0.296985	-0.994341	0	0.127774
yjbF	0.258109	0	0	0.226107	0.483847	0	0	0	0	0	0	0.0871407	1.17291
sufD	0.363391	0	0.168818	0	0.197997	0.0195022	0	0.541747	0.0451946	0.304157	-1.24149	0.279838	1.17114
cynS	0	0.133004	0.614068	0.13299	0	0.124572	0.0467781	0.150046	0.0269887	0	0	0.323656	1.17075
yjbB	-0.264663	0.223934	0.226324	0.223934	0.18238	0.196713	0.196713	0.223934	0.899461	0.600779	-0.610906	0.420755	1.17069
hpaX	0.246957	0	0	0	0	0	0	0	0.972605	1.16906	-0.53593	0.617788	0.0494216
ypdE	0.419144	0.0752014	0.0623778	0.0664838	0	0.0470145	0.0523097	0.0836875	0.947998	1.16893	-0.663127	0	1.00754
yfdE	0	0	0.319255	0	0	0	0	0	-0.602558	-0.592666	-0.324385	-0.211247	1.16884
aroP	-0.331905	0.586591	0.0409713	0.274065	0.236723	0.185758	0.321837	0.274065	-0.0179679	0	-0.268359	0	1.16856
napD	0.196466	0.219053	0.336284	0.224043	0.327916	0.352808	0.1741	0.219053	-0.566694	0	0.330674	0.174952	1.167
topB	0.0809219	0.252795	0.155185	0.252795	0.20215	0.225574	0.225574	0.252795	0.696811	0	0.00999985	0.268415	1.16609
pgm	-0.17093	0.0130632	0	0.0130632	0.0381757	0.152508	0	0.0130632	-0.411286	-0.6429	1.16572	-0.132218	-0.00913655
flhA	0.0986575	0.817188	0.71225	0.817188	0.689581	0.796534	0.794302	0.817188	0.490029	1.16551	-1.25237	0.544391	0.17812
ybeD	0	0	0	0	0	0	0	0	-0.616523	1.16538	0	0	-0.159575
yhiI	0	0.186135	0.0235284	0.0100281	-0.0434725	1.16479	0.230139	0.0100281	-0.730685	-0.159953	0.458566	0.0161441	0.88653
pagP	0	0	0	0	0	0.162572	0	0	-0.270575	-0.26894	-0.615441	-0.0462813	1.16475
mrdB	-0.066007	0.421272	-0.104163	-0.0927411	0.0741242	-0.114518	-0.0256294	-0.0927411	0.530228	0.198095	0.0556201	0.0398883	1.1647
prmA	-0.48268	0	0.351642	0.017604	0	0	0.00799195	0.017604	0.0298018	-0.409191	-0.504969	-0.032597	1.16458
dppD	0.305058	-0.182612	-0.372992	-0.300689	-0.331054	-0.27002	-0.276099	-0.300689	0.715877	1.0188	-0.329264	0	1.16401
sufE	0	-0.0473377	-0.219984	-0.183028	-0.0132641	-0.00395088	-0.201562	-0.183028	0.141191	0.358983	-0.0303323	-0.0927909	1.16325
yejE	-0.15164	0	0	0.297816	0	0	0	0	0.700262	1.16313	-0.593207	0.0494035	0
codA	-0.268493	0.318706	0.303567	0.317355	0.135209	1.16226	0.432872	0.318222	0	0.88845	-0.393042	0.288098	0.292757
rplB	0	0.1048	0	0.1048	0.0166847	0.1048	0.1048	0.1048	-0.309537	0	0.876858	0.0458262	1.16162
yigL	0	0.0191796	0	0.0314473	0.309532	0.124598	0.0082411	0.0865925	0.144716	1.16089	-0.849241	0.164097	0
mqo	-0.891139	1.16042	1.06839	1.1608	1.02577	1.13759	1.12482	1.16042	-0.545901	0.233213	0.0332973	0.78341	0.78341
hcaT	-0.337611	0.0999022	1.16065	0.0999022	0.0514418	0.204247	0.1243	0.0999022	0.664134	0.581751	0	0.146621	0.173976
sbcB	-0.367844	0.396254	0.320323	0.340698	1.1602	0.343956	1.1537	0.340698	-0.641849	-0.318763	0	0.00522302	0
eda	-0.221229	0.17963	0.941111	0.248401	0.187076	0.231025	0.287763	0.248401	0.23748	1.16019	0.0703313	0.486251	0.0244315
yibD	-0.440265	0.49961	0.522401	0.500247	0.502445	1.15926	0.479284	0.528868	-0.31927	0	-0.943027	0.517196	1.13465
sbmC	-0.124393	0	0.0605	0	0.520412	1.15913	0.218182	0	-0.288713	0.258328	-0.760379	0.179622	0
ptrA	-0.501819	0.188676	0.0910656	0.188676	0.0471223	0.161455	0.161455	0.188676	1.15728	0.754564	0.426919	0.304761	-0.195239
ychE	-0.617436	0.285586	0.687975	0.285586	0.269032	0.258364	0.258364	0.285586	-0.693819	-0.398526	-2.15498	-0.0983293	1.15533
glpC	0.107821	0.0391589	0.269857	0	0	0	0	0.033882	0.577641	1.15528	0	0.0290788	0.221051
nsrR	-0.356505	0	0.08425	0.284567	0	0	0	0	0.953021	1.15302	0.087143	0.162887	0.219229
prpB	-0.523768	0.267379	0.29017	0.284856	0.315591	0.702042	0.262176	0.263701	0.817574	0.807245	-0.128661	1.15283	0.278408
wcaE	0	-0.146668	-0.0701479	-0.146668	-0.103933	-0.168467	-0.165295	-0.125931	0	0	-0.166624	0	1.15259
yjcE	0.124159	1.06451	0.326936	0.269449	0.4072	0.293822	0.243369	0.269449	0.0623449	-0.190809	-0.73508	0.0216434	1.15229
mltF_2	0	0.0401153	0	0.0341647	0	0.0103121	0.0092837	0.0341647	-0.0432778	0	-1.04279	0.0133202	1.15111
ghrA	-1.09415	0	0	0.0715227	0.218719	0.558443	0.0468305	0.073266	-0.455542	0	1.15072	0	0
fes	0	0.469901	0.428095	0.469901	0.358029	0.319267	0.462124	0.469901	0.281149	1.14954	0	0.247	0.0427938
oxyR	-0.350661	0	0	-0.0477327	-0.0445456	-0.0742209	0.0511466	-0.0477327	0	1.1492	0	0.063216	0.14463
tauB	-0.143357	0.0145506	0.339741	0.798993	0.304976	0.0155912	0.0690376	0.00910552	0.363439	1.1491	0	0.480853	0.0181165
yqfE	-0.109224	0.334185	0.637604	0.360401	0.137832	0.663155	0.34123	0.360401	0	1.14858	-0.564637	0.423386	0.138993
yciZ	-0.653507	1.14845	0.648123	0.536385	0.528806	0.514608	0.718512	0.536385	-0.565715	0.275592	-0.574434	0.154154	0.4831
efp	0.502529	0.284892	0.254186	0.289708	0.272175	0.316759	0.354719	0.284892	-0.021516	0.191874	0	0.261711	1.14765
recX	0	0	0	0	-0.0776547	0	0	0	0.471099	1.147	0	0.0712091	0.464355
napG	0	-0.245188	-0.393548	0.270639	0	-0.397051	-0.417082	-0.309704	0.301174	1.14672	-0.706943	0.326126	0.872066
lipA	0	0.588553	1.14658	1.03295	0.957212	0.816382	1.0231	0.990397	0	0.993633	-0.552676	0.714851	0
ycjW	0	0.121159	0.26078	0.0664484	0.213698	0	0.0460788	0.136109	0.317078	1.14591	-0.14657	0.384192	0.601481
dadX	-0.235187	0.269154	0.373109	0.269154	0.560481	0.897626	0.453354	0.316029	-0.491437	-0.321791	-0.518629	0.18293	1.14524
pnp	-0.880826	0.231095	0.268289	0.335729	0.219746	0.280558	0.157802	0.306911	0.429427	-0.108326	0.156271	0.132213	1.14415
yjjZ	-0.64479	0	0	0	0	0	0	0	0	0	1.14387	0	-0.214977
cyoB	-0.761689	0	-0.0176043	0	0.0304795	0	0	0	-0.0509005	1.1433	-0.345977	0.362758	0
yeeO	-1.75089	0.675078	0.623019	1.14174	0.468924	0.66056	0.66056	0	0	0	-2.09797	0	0
yhiS	-0.960893	0.384714	0.452372	0.384714	0.576493	0.354939	0.357493	0.384714	-0.377567	-0.0443089	0.307713	0.883081	1.14099
ycfH	-0.854992	0.445716	0.738794	0.318158	0.285045	0.418494	0.418494	0.445716	0	1.11984	-1.2378	0.714076	1.13978
aroE	-0.468418	0.000146688	0.148253	0.274339	0.847072	0.304959	0.258984	0.274339	0.193534	0.859395	-0.110469	0.888005	1.13938
glmS	0.247033	0.0991649	0.586776	0.0991649	0.605184	0.0719434	0.23044	0.0991649	1.13935	0.778624	-0.688055	0.0737461	0.727274
mtr	-0.382505	0.323771	0.402423	0.323771	0.23448	0.302846	0.362303	0.323771	-0.711241	-0.100296	0	0	1.13913
yaaI	-0.389766	0	0.140635	0	0	0.0333567	0	0.00825749	-0.554926	1.13911	-1.25316	0.00387502	0.562001
exuR	-0.438018	0	0	0.229996	0	0	0	0	0.722974	0.295957	1.13898	0	-0.211745
ycjS	-0.0461868	-0.282806	0	-0.282806	-0.202898	-0.310027	-0.310027	-0.216139	-0.0743207	0.181607	0	0.0787491	1.13772
yceI	-0.265874	0.387624	0.129126	0.386751	0.478251	0.627406	0.363558	0.387601	0	0.371048	-0.120384	0.289455	1.13718
rplS	-0.31721	0.413762	0.324176	0.42422	0.3487	0	0	0.38652	0	0.757702	0	1.13712	0.234215
ykiB	-0.100969	0.12042	0	0.123771	0.244658	0	0.0235816	0.120414	-0.205675	-0.464077	0	-0.109306	1.13665
purK	0.0640452	0	0.123099	0.480613	0.0688106	0.140268	0	0	0.247766	0	0.644203	0	1.13617
garR	-0.0732144	0.474617	0.309047	0.474617	0.369316	0.509257	0.467922	0.474617	0.0918187	0.195052	0.0161744	0.44998	1.13613
murI	0.81101	0	-0.0143553	0	-0.0279625	0	0	0	0.721918	1.13584	0.0764981	-0.300659	-0.300659
yjjL	0.14382	-0.155675	-0.103286	-0.155675	-0.0171703	-0.182896	-0.132896	-0.155675	0.592574	1.13567	-0.7882	0	-0.0796062
yeaT	0.0495878	0.0641208	0	0.0641208	0.324265	0.0247692	0.0426302	0.0641208	0.306826	1.13532	0.390359	0	0.444672
emrY	-0.737176	-0.0326495	-0.13026	-0.0326495	-0.174204	-0.059871	-0.059871	-0.0326495	-0.460378	-0.364989	-0.728064	-0.325655	1.13478
tsf	-0.482483	0.163335	0	0.90274	0.0124876	0	0.0736515	0.163335	-0.413743	0.0452159	0	0.00275164	1.13434
dppA	-0.324643	0.402166	0.85796	0.305641	0.271529	0.378607	0.378607	0.402166	-0.654577	-0.0959961	-0.765294	0	1.13408
ybbC	0.439652	0.0922356	0	0.0922356	0.240895	0.170678	0.0650141	0.0922356	0	-0.31732	0.0954518	0.348809	1.13339
tauC	-0.352278	-0.107146	-0.161278	0.10677	0	-0.134367	-0.00393244	-0.107146	0.145762	0.565384	-0.563576	0.0305792	1.13305
yliE	1.06835	0.627426	0.550683	0.575442	0.482956	0.614072	0.608984	0.634005	1.13299	0.201435	-0.180555	0.248089	0.128895
fecR	-0.422568	-0.235039	-0.273827	-0.235039	0	-0.110204	-0.144614	0	-0.667031	-0.381604	-0.596405	0.0887073	1.13297
yejG	-1.10958	0.762228	0.759751	0.745152	0.760885	0.123666	0.639249	0.716471	-0.704389	0	-0.815593	0.240798	1.13251
lsrD_2	-0.231747	0.0628325	0	0	0.0851342	0	0	0	0	-0.534308	0	0	1.1325
yjbH	0.563631	0	0	-0.015082	-0.226936	-0.0728803	-0.108496	-0.0117462	1.13073	0.0281993	-0.00777561	-0.30263	-0.30263
ldhA	0.113632	0.149811	0.25732	0.255224	0.425765	0.161975	0.0488665	0.255224	-0.384807	-0.346485	-0.0923521	0	1.12777
ygcR	0	0.111199	0.176209	0.114114	0.0619412	0.276958	0.133363	0.114114	0.479984	1.12745	-0.03036	0.432071	0.522625
chbR	-0.128942	0.0321469	-0.19625	-0.14968	-0.154822	-0.165695	-0.171092	-0.14968	0.633807	1.12652	0.141752	0.0871962	0.472602
gltA	0.550856	0.399704	0.528228	0.390688	0.262984	0.926616	0.491079	0.384178	0.50974	0.843023	-0.298422	1.12637	0
zraR	0.450586	0.239544	0.402553	0.813444	0.16049	0.274822	0.311383	0.302044	-0.285313	1.12613	0.0803739	0.38637	0.21502
sgcC	-0.187974	0	0	0	0	0	0	0	-0.137653	-0.172254	-1.08498	-0.0729899	1.12609
yehT	0	0.165839	0.0972498	0.165839	0.0598367	0.661994	0.147949	0	0	-0.0745473	0	0	1.12575
flgE	-0.119174	0.135481	0.189688	0.134783	0.0998355	0.11696	0.114985	0.100652	0	1.04638	-0.0167326	1.12477	0.671818
ycgG	0.322019	0.054152	0.0709784	0.0493483	0	0.0972192	0.0288971	0.0493483	-0.243097	-0.0929368	0	0	1.12409
yaaJ	-0.411712	0.273273	0.268442	0.273273	0.27035	0.263331	0.327571	0.284542	-0.258776	0.364838	-0.40847	0.18584	1.12384
ybl113	-0.6798	0.181803	0.109043	0.214727	0.309452	0.198426	0.199027	0.214727	-0.834035	-0.201513	-1.49313	0.167617	1.12184
yjcB	-0.188621	0.62725	0.560388	0.628166	0.65346	0.748855	0.613587	0.628166	-0.275356	0	0	0.549944	1.12179
lpxB	-0.672461	0.115804	0.231944	0.115804	0.0762085	0.0906278	0.0809013	1.12168	0	0	-1.31921	0.0324548	0
cyoC	-0.200737	0.240636	0.311535	0.313196	0.289567	0.307165	0.198134	0.240636	-0.402928	-0.018134	0	0	1.1214
insAB-4	0	0.223555	0.103987	0.223555	0.478242	0.196334	0.191155	0.208553	-0.356135	0	0	1.12124	0
ascG	-0.0925307	0	0.0306361	0	0	0	0	0	0.463674	1.12009	0	0	0.622407
tesA	0	0	0	-0.13838	0	-0.153503	-0.116466	0.0795207	0	1.11944	0	0	0
ymdF	0	0.150191	0.0376214	0.632189	0	0.190661	0.0313166	0.188897	0.199777	0	-0.334543	0.10566	1.11902
ybiW	-1.21466	0.20268	0.105069	0.20268	1.11777	0.175458	0.175458	0.20268	-0.583185	-0.0647658	-1.06151	0.818765	0.926074
flhB	0	0.142497	0.18646	0.142497	0.0588156	0.103089	0.11648	0.142497	1.01235	1.11763	-0.644434	0.475787	0.944309
ybdN_2	0	0.0713744	0.00254247	0.0842162	0	0.0597913	0.0469495	0	-0.0327116	0	-0.711763	-0.250463	1.1176
ybl213	0	-0.0543577	-0.0965201	-0.0565236	-0.0857158	0	-0.0223525	-0.0543577	0	0	0	0.0167221	1.11746
glnG	-0.113566	0.0717385	0.135542	0.0717385	0.0563174	0	0.0336829	0.071438	-0.114686	1.11694	-0.607337	0	0.812374
folC	-0.606469	0.0912058	0	0.254302	0.886918	0.0603811	0.201882	0	0.220947	1.11617	-0.868715	0.390106	0.493361
psiE	0	0	0	0	0.215719	0	0	0	0.303888	1.11274	-0.334115	0.530498	0.421744
yhhS	-0.240376	0.123014	0	0.123014	0.189793	0	0.0957928	0.206348	0.652644	0.895483	-0.672475	0	1.11124
katG	0.197921	0.340348	-0.365556	0.368845	-0.242832	-0.295166	-0.1285	-0.267945	0.412922	1.11107	0.678712	-0.485193	-0.65186
yedY	0.238028	0	0.0884318	0	0.299545	0	0	0	0.288265	0.924408	0.541528	0.174055	1.10955
yciX_2	-0.365451	-0.39492	-0.151134	-0.42441	-0.162919	-0.421431	-0.421431	-0.245377	0	0	-0.168166	0	1.10897
yghG	0	-0.193523	-0.210913	-0.193523	-0.230419	0	-0.212738	-0.193523	0	-0.474775	-0.158952	-0.28369	1.10631
norR	-0.645666	0.260272	0.269275	0.260272	0.226128	0.15597	0.237899	0.260272	0.736851	1.10436	-0.869235	0	0.497145
ybl76	0.598246	0	0	0.0166995	0.145043	0	0.0105882	0.0166995	0.4013	1.10413	0	1.07123	0
yebY	0	-0.152305	-0.238748	-0.270377	-0.253142	-0.290668	-0.261903	-0.270377	-0.166446	0	-0.0811737	-0.235994	1.10388
atoC	-0.552822	0.676079	0.532231	0.678005	0.557166	0.627871	0.646339	0.676079	-0.335086	0.347927	0.176462	0.64809	1.10181
tyrP	-0.0479539	0	0.240205	0.230167	0.111608	1.10136	0.197581	0.231143	-0.0551687	0.586678	-1.56921	0.100502	1.09272
hemE	0	0	0	0	0	0.580518	0	0	0.676134	0	0.324712	-0.022829	1.10103
yhdE	0	0	0.0516787	0	0.110658	0	0	0	0.0431965	1.10094	-0.503503	0	0.384819
dnaX	0	0	0	0	0	0	0	0	0.362783	0.583015	-0.219793	0.23052	1.10086
yihN	0	-0.0718095	-0.0891887	-0.0718095	-0.137786	0.306722	-0.0263554	-0.0436229	0.142497	0.143712	0.664278	0.365677	1.10018
yihI	-0.249511	0.386829	0.283666	0.386829	0.312633	1.1001	0.343023	0.462661	-0.638328	0.225443	-0.224305	0.00393493	0.926968
yfaX	-0.116125	-0.039759	-0.037046	-0.127489	-0.0337096	0	-0.12346	-0.127489	0.679092	1.09896	-0.232009	0	0.552321
mhpC	-0.0676143	0.248653	0.321548	0.248653	0.126073	0.200622	0.153544	0.248653	0.377918	0.692713	0	1.02405	1.09798
glpT	-0.0502891	0.876562	0.749155	0.920397	0.721214	0.605764	0.794363	0.876562	-0.394839	1.09772	-0.643253	0.457284	0.71878
yhbU	0.242741	0.0156957	0	0	0.224226	0	0	0	1.09756	0.383774	0	0.410882	0.172141
ydhF	0.884021	-0.633658	-0.745406	-0.633658	-0.457381	-0.643617	-0.643617	-0.633658	0	1.09718	0.0333428	0	-1.03308
metC	0	0.347052	0	0.0599137	0.0709087	0.0874093	0.03922	0.0595562	-0.201364	0.367041	0.00825167	0.321207	1.09717
rutE	0.235541	0	0	0	-0.114261	0	-0.00568849	0	0.14937	0.0355734	0	0	1.09705
sodC	0.0391884	-0.0232543	0.00597555	-0.0232543	0.0953655	-0.0491479	-0.0491479	-0.0232543	1.09693	0.619656	0.200939	0.825114	0.303132
ugpA	0	-0.0214266	-0.0695299	-0.0268641	-0.0947611	0.265838	0	-0.0268641	0.256065	1.0965	0.514701	0.152524	0.15857
sbmA	0	0.757906	0.692557	0.719444	0.654131	1.0962	0.722185	0.509668	-0.593429	-0.0186426	0	0.410219	0.752352
galU	-0.420074	0.397802	0.411302	0.397802	0.654577	0.37058	0.37058	0.397802	0	1.09608	-1.01861	0.236109	0.38449
glnW	0	0	0.110492	0	0	0	0	0	0	1.09498	0.335216	0.378609	0
hyfA	-0.50646	0	0.00984151	0	0	0.54212	0	0.233324	0.0168511	1.09484	0	0.0786016	0
yraJ	0	1.09447	0.735049	1.09447	0.7569	1.06725	1.06725	1.09447	0.589365	0.953008	-1.66305	0.912588	0
ais	-0.5679	0.595647	0.541515	0.595647	0.454093	0.611904	0.568426	0.595647	-0.106565	0.348762	-0.361183	0.483381	1.09399
hisA	-0.129137	-0.0952056	-0.125967	-0.0478779	-0.0177228	-0.0696551	-0.0829885	-0.0478779	-0.247911	0	-0.174998	0	1.09389
yhdZ	-0.546682	-0.036549	-0.13416	-0.036549	0	0	-0.0637705	-0.036549	-1.04261	-0.315022	-0.0910349	-0.420464	1.09348
mukF	-3.46004	0.183435	0	0.183435	1.09253	0.183435	0.0925262	0.183435	0.432687	0	-1.87723	0	0
msrB	-0.478306	0.196185	0.0863531	0.196185	0.054631	0	0.33563	0.677965	-0.659868	1.09115	0.298745	0.310837	0.582535
allD	0.332497	-0.521633	-0.56994	-0.521633	-0.387648	-0.544107	-0.544107	-0.535569	0.165312	0.170542	-0.0744957	0.0145271	1.09009
murR	0.122305	0	0	0	-0.0261328	0.0705578	0	0	0.299033	1.08994	-0.897424	0.0491856	0.981196
adrA	-0.177138	-0.00749688	0	-0.0993653	-0.0534223	-0.0677632	0.205283	-0.0816761	0.60933	0.400322	0.0363102	-0.06152	1.0897
rsmB	0	0.00346986	0	0.0162173	0	0	0	0.000500949	-0.179116	-0.235597	1.08947	-0.182174	0
rpsC	0.0136194	0	0	0	0.264344	0	0	0	-0.424342	0	0	0	1.08938
gatC	0	0	0	0.3206	0	0	-0.152212	0	0.1904	0.657453	-0.922067	0.262348	1.08816
hyfB	0.0358387	-0.306066	-0.403677	-0.306066	-0.0382409	-0.333287	-0.333287	0.294953	0	0	0	-0.0615251	1.08781
yifN	0.20964	0	0.13223	0	0	0	0	0	1.08708	0.843762	-0.209134	0.409073	0.195898
rbbA	0.103337	-0.37723	-0.474841	-0.37723	-0.518784	-0.404451	-0.404451	-0.37723	0.501622	-0.0188605	-0.765527	0.135096	1.08693
idnT	-0.502958	0.0718967	0.0366992	0	0.480354	0.0620802	0.460477	0.072243	-0.33294	-0.331998	0	0	1.08579
rbsC	0.0975409	0.113272	0.260307	0.0343243	0.0581151	0.0085355	0.0085355	0.0343243	0.827641	0.467688	-0.782575	0.0589018	1.08551
ybaQ	-0.527249	0	0	0	0	0	0	0	0.159977	1.08459	-0.454208	0.0671573	0.173045
ybjD	0	0.58489	0.0840358	0.141539	0.099711	0	0.0600485	0.142359	0.42865	1.03446	0	0.0654659	1.08441
yhiN	-0.0677341	0.0388576	0.0797586	0.0848705	0.397367	1.0842	0.223223	0.0848705	0.173544	0.146599	0	0.0158418	0.665998
exoX	-0.0367423	0.516952	0.508361	0.516952	0.335565	0.491432	0.573982	0.569036	-0.137219	0	-0.837149	0	1.08367
sgrT	0	0	0.198075	0.162894	-0.00356556	0	0.0185353	0.197402	-0.0651007	0.185343	0	0.121886	1.08365
rmf	-0.635659	0	0	0	-0.0119175	0	0	0	0.130703	-0.382114	0	-0.254278	1.08341
fklB	-0.620744	0.203294	0.483233	0.205468	0.280794	0	0.183311	0.219828	-0.363402	1.08306	-1.69873	0.400096	-0.00307105
ampH	-0.555886	0.089022	0.224368	0.242868	0	0.0783553	0.143435	1.08198	0	0.648177	-0.711987	0.435367	0.167613
yhiR	-0.170716	0	0.0861612	-0.00473617	-0.133269	0	-0.0429074	0.322335	-0.477055	0.0706213	-0.814267	-0.169549	1.08154
fhuC	0	-0.155376	-0.0668215	-0.14272	0.0754339	0	-0.0779694	-0.14272	0.102484	1.08122	0	0.102451	0.50083
diaA	0	0.527926	0.697888	0.527926	0.421177	1.07939	0.69757	0.568012	0	0.30807	-0.275947	0.479851	0
sufC	0.0255916	0.225368	0.320576	0.225368	0.345746	0.336643	0.201489	0.0867628	-0.0147343	1.07935	0	0.254319	0
astE	-0.050903	0.478047	0.546332	0.478047	0.336493	1.07901	0.450826	0.525666	-0.0612879	0	0.150211	0.156567	0
ttdA	-0.00760556	0.159074	0.0706334	0.138557	0.272659	0.194774	0.130995	0.138557	0	0.342176	-0.191213	0.183157	1.07852
ykgG	-0.179262	-0.022702	-0.0703128	-0.022702	-0.0642561	0	-0.047288	-0.022702	-0.285318	0.0745291	-0.157402	-0.297159	1.0778
frdB	-0.669899	-0.000476569	-0.0735446	-0.000476569	0.166551	-0.0109464	0	0	-0.165699	0	-0.373445	0	1.07749
ldcA	-0.191213	0.0795391	0.105022	0.0795391	0.0332231	0.0523177	0.314373	0.0795391	0.44958	0.488073	-0.36467	0.15129	1.07689
treB	-1.13137	-0.037545	0.113463	-0.037545	-0.209146	0	-0.0661763	-0.037545	-0.443151	1.07398	0	-0.13771	0.447046
agaE	0	0.0283437	0	0	0.167897	0.0437423	0.00721547	0.109079	0	0.739971	-0.473471	0.0853632	1.07346
yhjR	0.0458929	-0.140728	0	0	-0.173647	0	-0.107343	-0.140728	0.0925444	0	0.0276843	0.0410421	1.07312
abgR	-0.426613	0.224717	0.17596	0.249898	0.0824391	0	0.213282	0.224717	-1.09227	1.07106	0	0.546671	0.842355
ybcF	0	0.138846	0.304964	0.035131	0.00332985	0.227928	0.231667	0.151141	0.825103	1.07062	-0.499779	0.240108	0
malM	0	0.00546162	-0.18803	-0.130419	-0.0485751	-0.157641	-0.117641	-0.130419	0.0384342	0	0.0995397	0.114531	1.06847
yafS	-0.961099	0	0	0	0	1.06746	0	0	-0.160838	0	0	0	0
coaD	0	0	0	0	0	0	0	0	0	0.366941	0	0.0299738	1.06734
xylH	-0.872425	0.11525	0.0295428	0.11525	0.0641292	0.0913481	0.044917	0.11525	-0.0276446	1.06698	-0.53738	0.43394	0.615415
ihfA	0.453216	-0.0378186	-0.0186793	0	-0.0307057	-0.06504	-0.223536	-0.196315	0.582828	0.875611	-0.155622	0	1.06669
ygcG	-0.644278	0	0	0	0.0288421	1.06635	0	0	0	-0.47412	-0.159021	0	0.682986
frdC	-0.369723	-0.0526549	0	-0.0526549	0	-0.0735945	-0.0301623	0	0	1.0656	-0.223806	-0.107608	0.101291
ssuD	-0.03321	0.112753	0.0551504	0.197865	0.246802	0.171172	0.158371	0.176741	0.0179665	0.507998	0.604726	0	1.0653
sbcC	-2.49763	0.0517244	-0.0172181	0.0517244	-0.0735817	0.0245029	0.0245029	0.0517244	-0.70658	0.439506	-1.82061	0.0871912	1.06512
usg	0.229468	0.138193	0.314287	0.189586	0.0758234	0.660215	0.521609	0.108957	0.0478178	0.402018	0	0.454601	1.06492
ndh	-1.15924	1.0197	0.93923	1.06393	0.939093	1.04059	1.04286	1.06273	-1.27086	0	-1.4296	0.89162	0.994584
oxc	-0.240369	0.270655	0.193229	0.267754	0.147194	0.245705	0.812741	1.06364	-0.105182	0.819267	-0.634063	0.162008	0.172005
yabI	-0.374029	0	0	0.539364	0.0208292	0	0	0	0.232754	0.225768	-0.478676	0	1.06364
abgA	0	0.134164	0.10999	0.0491293	0.299049	0.13414	0.112094	0.134164	-0.640232	0	-0.597835	0	1.06315
atpE	0	0	1.06303	0	0	0	0	0	0	0.63909	0.567936	0.124993	0
araC	-0.176083	-0.243076	0.144561	0.0183604	-0.33623	-0.267201	-0.0771174	-0.26042	0.620825	1.0624	-0.114801	0.58615	0.811321
lgt	0	0.333001	0.274436	0.798547	0.245226	0.128544	0.196277	0.230765	-0.379247	0	0.377442	-0.0808506	1.0621
yafM	0.351439	0	-0.279587	-0.299475	-0.150469	-0.209198	-0.326696	-0.25402	1.00129	1.06198	0.214455	-0.0435347	0.366755
yjfP	-0.20005	0.307421	0.0372089	0	-0.0606499	0	0	0	0	-0.0408662	-0.111929	0.00133967	1.06167
ybiO	0.748291	0.286135	0.554731	1.06123	0.178471	0.304362	0.266006	0.242455	-0.20326	0.411153	-0.457574	0	0
ybhP	0.739405	0	0.193771	0	0	0	0	0	0.688206	1.06067	0.118386	0.315667	0.182428
yneK	0.21446	-0.278811	-0.210225	-0.260677	-0.336853	-0.220043	-0.201908	-0.260677	0	-0.0271456	0.027147	-0.0582317	1.06052
yifK	-0.159944	0	0.3123	0	0	-0.0589158	0	0	1.05973	-0.0242017	-0.842774	0.318477	-0.324301
aceK	1.05952	-0.368336	-0.203849	-0.294258	-0.18677	-0.349323	-0.0596172	-0.170728	0.929211	0.775981	-0.626026	0.201201	0.152373
yehQ	0.0637763	0.426422	0.446889	0.426422	0.513803	0.383969	0.381678	0.36064	-0.173662	0.163419	-0.213175	0.0494738	1.05919
prfB	-0.33974	0.183765	0.165316	0.185353	0.169349	0.0365315	0.146694	0.183765	0.278905	1.05866	0	0.410202	0.668542
ycaP	-0.152587	0.261526	0.296468	0.40604	0.299284	0.382611	0.424858	0.383107	-0.195868	0.241556	-0.904188	0.23024	1.05783
ybl222	0.279424	-0.348249	-0.398241	-0.348249	-0.0753319	-0.375471	-0.375471	-0.30063	0	-0.319972	-0.118647	-0.169909	1.0572
ushA	-0.240184	0.16426	0.0490571	0.167822	0.315165	1.05666	0.237196	0.16426	0.318192	0.486028	-1.04024	0	0
ygdT	-0.804881	0.926322	0.225783	0.926322	0.913153	1.05616	0.91579	0.926322	-0.0726789	0	-2.68613	0.374912	0
valU	-0.464043	1.05513	0.868697	1.05513	0.38361	1.0411	1.0108	1.05513	0	0.360848	0.379649	0.68811	0.740742
ykgE	-0.111504	0.00291917	0.133063	0.00291917	0.086664	1.05398	0.0789777	0.0754791	-0.439754	0	-0.334431	4.93717e-05	1.00756
epd	-0.788613	0.24014	0.279093	0.24014	0.243249	0.223138	0.220769	0.328522	-0.0261218	1.05265	-0.933495	0.529939	0.950146
entA	0.0961142	0	0	0	0	0	0	0	0.603508	0.853577	0	0	1.05264
ilvN	0.28296	-0.0069232	-0.0849545	-0.143655	-0.173751	0	-0.151728	-0.0886603	0	1.05234	-0.824451	0	-0.257102
ybl131	0	-0.028412	-0.0309725	-0.028412	0	-0.0592441	-0.0546633	0.112406	-0.0116184	0.198061	0	-0.279449	1.0515
parE	0	0.244013	0.146402	0	0.0539531	0.127664	0.216792	0.244013	-0.0920231	0	-0.441564	0	1.05114
ynjA	-0.146219	0	0	0	0	0	0	0	-0.0215993	1.05112	0	0	0.39952
yobH	-0.432998	0	0.158489	0	0.138892	0.00221285	0	0	-0.51531	-0.290745	0	0	1.05099
ybdD	0	-0.0671035	0	-0.0438477	-0.0884268	-0.094325	-0.094325	0	0.547287	0.615805	0	0.00629357	1.05069
gmk	0	0.100339	-0.00824746	-0.0777402	0.16189	-0.0672969	-0.0344356	0.308457	0.114207	1.05049	-0.991289	0.218579	0.94831
ydhL	0	0.759794	1.05048	0.759794	0.758421	0.815072	0.764488	0.759794	-1.24778	0.391466	-1.2799	0.505699	0.69263
der	0.266189	0.266968	0.969357	0.266968	0.125414	0.239747	0.239747	0.266968	-0.319173	-0.0893505	0	0.083053	1.04963
tmcA	0.601012	-0.0583487	0.0850086	-0.065261	0.127218	-0.0877043	-0.134875	-0.108553	0.96989	1.04957	0.63025	0.867378	-0.0342386
kdsA	-0.448854	-0.525354	-0.616038	-0.525354	-0.524051	-0.552576	-0.409719	-0.096783	0.0294437	0	0.135074	-0.526658	1.04942
insAB-25	0.00130296	0.0166881	0.0505809	0	0	0	0	0	0	1.04927	-0.667952	0.400205	0.967019
rsmG	-0.013743	0	0.00647423	0.000848959	0	0	0.0332938	0.00298538	0.454439	1.04791	-0.815132	-0.0288475	0.566394
prlC	-0.167881	0.203122	0.413019	0.203122	0.0615674	0.1759	0.1759	0.153532	0.166027	-0.154694	-0.314116	0.289093	1.04646
yeeN	0	-0.044241	-0.17197	-0.044241	0.244984	0	-0.0682095	0.45038	-0.120023	0.950095	-0.164209	0	1.0464
yrfG	0.137685	0.147286	0.0918051	0.147286	0.262949	0.117047	0.125896	0.141018	0.707497	1.04495	-0.327526	0.362606	0.513788
yfaP	0	-0.123268	0	-0.0904865	0	0	0	-0.123268	0.534634	1.04465	-0.710189	0	0.543143
ychO	0.457452	0.145559	0.105733	0	0	0	0	0	0.370946	0.301465	0	0	1.04356
fadL	0.569214	0	0	0	-0.0997132	0.253576	0	0	0.168468	-0.617843	-0.473898	-0.224427	1.04317
yeaG	-0.259414	0.0616057	0.304164	0.061786	-0.0120984	0	0.0270832	0.0729061	-0.371271	-0.428574	-0.240228	-0.055616	1.04304
guaB	-0.284016	0.632677	0.535066	0.632677	0.491123	1.04278	0.605456	0.632677	0.497902	0.574215	-0.853162	0.582095	0.464176
gltP	-0.751101	1.04192	0.944313	1.04192	0.90037	1.0147	1.0147	1.04192	0.261819	0.636133	-1.10534	0.658009	0.645378
gntX	-0.325494	0.483251	0.469949	0.277867	0.342053	0.0960832	0.383863	0.369298	0	1.04084	0.0311966	0.450888	0.661472
cdh	0	0.111248	0.359949	0.100887	0	0.235058	0.22911	0.0875878	0	0	-0.434501	0	1.04027
cheW	-0.123275	-0.0641767	0	-0.0641767	0.0217921	-0.111444	-0.0875713	-0.0206355	0.928466	1.03948	0	0.0715272	0.214817
frlB	0.1658	0.221425	0.471688	0.370455	0.382747	0.83964	0.302628	0.370455	0.707317	1.03886	-1.08023	0.371156	0.0835155
dgoA	-0.373137	0	0	0	0	0	0.201643	0	-0.561751	0.507628	-0.635336	0.0151749	1.03837
yfiC	-0.226414	-0.122344	0	-0.122344	-0.0391189	0	-0.149566	-0.122344	0	0.909425	-0.228485	0.403973	1.03812
cpxP	0	0.191331	0.0577098	0.10777	0.0442735	0.0238667	0.147471	0.190586	0	1.03666	0	0.0294239	0
mnmA	0.0354494	0.799817	0.747565	0.794629	0.427141	0.588203	0.842265	1.03644	0	0	0	0	0.985989
ltaE	0.15507	-0.261653	-0.0265306	-0.346924	-0.347222	-0.367815	-0.367815	-0.346924	0.539618	1.03607	-0.278601	-0.2462	-0.23244
ycaL	0.0467955	0.108476	0.452696	0.107897	0.230678	0.087804	0.247922	0.801086	0.660559	1.03569	-0.647283	0.586918	0.234743
rhlE	-0.323698	0.721758	0.336387	0.307473	0.233236	0.284553	0.166995	0.301846	0	0.924826	-1.44105	0.0831133	1.03558
ybl105	-0.262423	0	0	0	0	0	0.0946724	0	0	0	-0.221353	0	1.0355
cybC	0	0.165114	0.381488	0.201881	0.101352	0.133391	0.205259	0.200289	0	0	-0.0763548	0.282125	1.03523
proP	0.492777	0.260619	0.144643	0.265018	0.321473	0	0.236038	0.260619	0.479031	0.903044	-0.103983	0.706321	1.03496
ydjA	0	0.770099	0.365702	0.315296	0.435421	0.215802	1.03322	0.478282	0.113121	0	-0.161607	0.281683	0.438795
mnmG	-1.03153	1.03174	0.493145	0.324052	0.202699	0.309478	0.285496	0.332598	0.0118541	0.587334	0	0.175801	-0.0288059
ptsG	-0.224498	0.0420709	-0.0555399	0.0420709	-0.0994832	0.0148495	0.0148495	0.0420709	0.378489	0.533069	-2.48293	0.0543966	1.03112
qseC	0.101727	0	0	0	0.062198	0.326712	0	0	0	0	1.03047	0	-0.336232
spr	0	0.596071	0.53846	0.596071	0.75021	1.0303	0.60885	0.596071	-0.433455	0.711498	-1.86191	0.298243	0
yegW	0	0.182262	0.110435	0	0.055887	0.162231	0.162231	0.625846	0.333388	0.338842	-0.844752	0.167178	1.02893
yphE	-0.37204	-0.16052	0	-0.16052	-0.115922	-0.0928164	-0.0671224	-0.16052	0.385881	1.02851	0.197714	-0.125653	0.772812
garK	0.0099574	0	0.157735	0	0	0	0.0116971	0	0.132553	0.545818	0.392418	0	1.02717
tyrV	0	0	0	0	0	0	0	0	0	0.677125	-0.430197	1.02716	0
uhpC	-0.32039	-0.181487	-0.301181	0.518468	-0.329156	-0.270817	-0.15797	-0.188608	-0.558618	-0.921639	-0.877916	-0.388872	1.02692
yfcC	-0.240282	0.0138748	-0.083736	0.0138748	-0.127679	-0.0133467	-0.0133467	0.429116	-0.338895	0.557982	-1.66979	-0.37004	1.02628
yadL	-0.480793	0.280415	0.11405	0.280415	0.145016	0.254377	0.254377	0.280415	0	0.267724	-0.209036	0.0871054	1.02609
ydjY	0.107395	-0.0168337	-0.0147188	-0.0168337	0	0	-0.0359469	-0.0168337	0	0	0	0	1.02517
dapA	0.00321311	0	0	0	0.237213	0	0	0	0.0572839	0	-0.518162	0	1.02504
focB	0.507644	0.139063	0.225613	0.0908051	0.0940055	0.0759887	0.0741046	0.293523	0.814932	1.02434	-0.794824	0.0345031	0.71247
dhaL	0.0377064	0	0.00545342	0	0	0.211426	0	0	-0.372293	1.02403	0.0523887	0	0.357071
aceB	-0.400974	0.496871	1.02399	0.496871	0.616734	0.478877	0.478877	0.377915	-0.674223	0.873938	-1.30685	0.31577	0
ybl11	0	0	0	0	0.0262744	0	-0.0351768	0	-0.343338	-0.217857	0	-0.116559	1.02383
xdhB	0	-0.252548	-0.332383	-0.28714	-0.100968	-0.258679	-0.278914	-0.28714	0.474122	1.02372	-0.340098	0.0326128	0.681573
fxsA	-0.217756	0.164608	0.199815	0.307005	0.254837	0.826793	0.433013	0.327409	-0.470709	0	0	0.423607	1.02353
ybcL	-0.187815	0	0	-0.0497551	-0.191309	-0.0769766	-0.0769766	-0.0497551	0	-0.0259071	0.40678	0	1.02312
poxA	-0.257215	0.210147	0.333255	0.210147	0.503615	0.107305	0.160244	0.199943	-0.223476	-0.194232	-0.531471	0.0621663	1.02271
acpT	-0.13664	-0.392348	-0.10561	-0.392348	-0.145077	-0.41793	-0.418103	-0.384811	-0.306541	-0.175978	0.0327217	-0.248452	1.02268
yraR	0.0236886	0	0	0	0	0	0	0	0	1.02257	-0.160358	0.104408	0
gntT	-0.320062	0.378641	0.2984	0.392931	0.254457	0.845589	0.36879	0.396011	-0.307412	1.02174	-1.0085	0.538923	0
lexA	-1.59737	0.456093	0.367069	0.617194	0.543023	0.537558	0.537086	0.539217	-1.25279	0.0823968	-1.02485	0.450978	1.02087
thiP	0.0498717	-0.135707	-0.173322	-0.15547	-0.179729	-0.153267	-0.0328759	-0.226474	1.02069	0.598839	0	-0.610389	-0.235389
helD	-0.667244	-0.125735	0.199333	-0.125735	-0.268346	-0.144891	-0.16107	-0.125735	1.01997	0.613605	-0.758063	0.594228	0
hemY	-0.414719	1.01958	0.208032	0.397218	0.278945	0.705488	0.235368	0.397218	-0.0665243	0.482142	0.0834748	0.210814	1.01599
artI	-0.152825	0	0.270793	0.162795	0	0.167338	0.159833	0.163138	-0.840892	0	0	0.120296	1.01887
mdtG	-0.468404	0.488618	1.01803	0.537337	0.408058	0.51518	0.491924	0.537337	-0.36228	-0.0388863	-0.311533	0.161512	0.0543013
thrC	-0.258838	0.688926	0.694152	0.688926	0.808518	0.777801	0.670134	0.688926	0	0	0	0.618774	1.01802
znuA	-1.35679	0.867242	1.01673	0.858024	0.725688	0.84002	0.84002	0.867242	-0.440367	0	-0.486131	0.944357	0.905778
kdsC	-0.143956	0.139648	0	0	-0.00509731	0	0.266708	0	-0.101556	0.00583305	0	0.134166	1.01667
ygaXY	-0.30486	0	-0.112653	0	0.0258259	0.535244	0	0	0	0	-0.366639	0.301593	1.01655
ybl170	-0.181659	-0.0971372	0	-0.0971372	0.017613	-0.203443	-0.0697768	-0.0971122	-0.443122	-0.499082	0	0.0124022	1.01635
gmd	0.319134	0.460657	0.363046	0.460657	0.369103	1.01621	0.512684	0.510657	-0.276687	0.955887	-0.298345	0.504854	0.20247
flgH	0	0	0	0	0.201316	0	0	0.0506661	0.240231	0.479831	0.381123	0	1.01612
galS	0.1386	-0.688797	-0.284213	-0.688797	-0.608071	0.840108	-0.467647	-0.714429	0.299957	0.112469	-0.137928	-0.101134	1.01605
panB	-0.338493	-0.181027	-0.37323	-0.405876	-0.47408	-0.25284	-0.267596	-0.405876	0	0	-0.0085497	-0.298692	1.01585
hyfI	0	0	0.00495922	0	0	0	0.167879	0	0.216981	1.01514	-0.0501408	0.00466169	-0.0806764
yfiF	-0.759892	0.4963	1.01351	0	0.000852824	0.118083	0.0695421	0.0543518	-1.05973	0	0.216366	0.112462	0
speG	-0.0134399	0	0	0	0.0123616	0	0	0	0.0362168	1.01286	-0.389688	0.636789	0
mdtM	0.397293	0.163756	0.0969388	0.199608	0.31655	0.272386	0.172386	0.199608	-0.0599282	1.01147	0.258396	0.286283	0.0958149
ycgE	0	0.705978	0.122425	0.31568	0	0.263515	0.286671	0.31568	0	0.357558	0	0.00780368	1.01137
dppB	0.317471	0	0.167449	-0.231054	-0.156167	-0.240797	-0.0348637	-0.231054	0.405769	1.01113	-0.0352546	0.028311	-0.0243865
ycjG	0	0.147159	0.0760512	0.196649	0	0.512158	0.139988	0.139687	0.0570809	1.01051	0	0.43483	0
ahpC	-0.60566	0.316983	0.459518	0.321689	0.184268	0.346699	0.257964	1.00953	-0.606192	-0.164786	-0.163617	0.818774	0
rsgA	-0.00201548	0	0	0	0.0473297	0	0	0	0	-0.148716	-0.209309	0	1.00795
tdcF	-0.182994	0	0	0	0	0.119009	0	0	-0.249592	0.197053	0	0	1.00687
cysI	-2.44671	0	0	0	-0.0362806	0	0	0	0.331142	1.00676	-0.186799	0	-0.278641
mrr	1.00668	0.0429524	0	0.0429524	-0.0962911	0	0.0180416	0.0429524	0.856192	0.752107	-0.281684	0.170226	0.189047
yijE	-0.319977	0.350242	0.163047	0.349186	0.435778	0.4097	0.372663	0.399884	0.556935	1.00543	-0.222397	0.26674	0.362532
metN	-0.983926	0.171177	0.088583	0.171177	0.143406	0.650444	0.145127	0.171177	-0.0188014	0.487508	-1.34949	0	1.00494
tppB	0.567003	-0.132734	-0.115515	-0.132734	-0.0334114	-0.069046	-0.159955	-0.132734	0	1.0048	0.335603	0.118334	0.291633
glcD	0.227036	-0.0789117	-0.148592	-0.00579469	-0.0764469	-0.161918	-0.153575	-0.0819837	1.00417	0.687285	0.397541	-0.243454	0
ygiA	-0.243428	0	0	0	-0.0515225	0	0	0	-0.810945	0	0	-0.222455	1.00399
narV	0	-0.0681294	0	-0.127311	-0.0122738	-0.182422	0	0.037192	0.104688	1.00331	-0.232044	0.195187	0.886389
kdgR	0	0.165135	0.120944	0.547516	0.103579	0.0868683	0.146898	0.165135	-0.0436724	0.119237	-0.857966	0.337862	1.00309
yhaB	0.00193425	0	-0.100992	-0.211612	0	-0.215886	-0.0644571	-0.057103	-0.032862	0	0	-0.0622965	1.00303
manX	-0.269604	1.00176	0.916346	1.00176	0.877896	0.977937	0.977937	1.00176	-0.342399	0.382593	-0.19586	0.67435	0.497783
ygbK	0	0.787894	0.354489	0.528096	0.305678	0.510464	0.427602	0.528096	0.221943	1.00139	-0.647678	0.153915	0
upp	-0.268325	0.369261	0.4979	0.368438	0.524346	1.00125	0.344568	0.39865	0.127296	0.714758	-0.375144	0.451983	0.701684
msrA	0	0	0	8.14099e-05	0.616387	0	0.0768537	0.00013075	0.638457	1.00109	-0.586996	0.482021	0.484958
metY	-0.47488	0.0964374	0	0	0	0	0	0	-0.540483	1.00107	-0.674803	0	0.949576
nudK	0.10662	0.398421	0.105945	0.220744	0.380394	0.273559	0.327316	0.227312	0.987551	1.00102	-0.171113	0.245436	0.483979
araF	-0.074379	0.241721	0.362675	1.00077	0.326413	0.264559	0.316224	0.222047	-0.475747	0.542086	-0.518546	0.202232	0.241208
mqsR	0	0	0	0	0	1.00051	0.0512656	0	-0.0528905	0	-0.289617	0.0427827	0.402127
yfgG	-0.113947	0.0300589	0.176414	0.00443689	0.172263	0.35134	0	0.0650096	-0.378469	-0.0820623	-0.376659	0.212816	1.00012
alkB	0	0	0	0	0.167255	0.184394	0	0	-0.102787	0.152329	0.396389	0	0.999967
amiA	0.833185	0.155213	0	0.155213	0.30133	0.140719	0.209143	0.155213	0.610719	0.999849	-0.0934417	0.162307	0.738235
yjgA	-0.111151	0.436943	0.212237	0.342468	0.13988	0.776777	0.293976	0.339844	0.209062	0	0	0.461638	0.999776
yqeG	-0.192245	0.999638	0.907356	0.999638	0.979772	0.970242	0.970242	0.999638	-0.221532	0.216379	-1.52757	0.5941	0.628923
tbpA	-0.0227932	0.222953	0.163299	0.218908	0.242805	0.440284	0.252961	0.128309	0.0389125	0.0831941	-0.256783	0.28421	0.999357
yncD	-1.03268	0.999	0.859568	0.990511	0.870239	0.978492	0.973746	0.99011	-1.45541	0.577681	-0.294089	0.627878	0.845049
soxR	0	0	0	0	0.158602	0	-0.0268291	0	-0.102581	-0.537449	0	-0.128054	0.997919
yhgF	-0.983146	0.447803	0.45974	0.645321	0.487433	0.557508	0.573587	0.588892	0.997683	0.695408	-2.60155	0.55483	0.176019
prfC	-0.980936	0.0267411	0.0773735	0.0267411	0	0	0.00371559	0.154149	-0.222273	0.0425348	0.450539	0	0.99754
tyrR	-0.726936	0.735106	0.642352	0.722419	0.612942	0.667021	0.710806	0.708566	-0.184606	0.341683	-1.0044	0.996917	0.27078
aroA	-0.127384	0.39386	0.117225	0.394936	0.499731	0.381697	0.370048	0.996899	0	0.221745	-0.264332	0.0748086	0.160665
ygfF	-0.276551	-0.464275	-0.524849	-0.0475315	-0.304745	-0.0308197	-0.491496	-0.464275	-0.387075	0.0290901	-0.137072	-0.514857	0.996644
yhiJ	0.808628	-0.00845943	-0.0151611	-0.00845943	0.0318046	0.996317	0.17769	-0.00845943	0	-0.338768	-0.317578	0.0746835	0.907248
ttdT	0.182337	0.409928	0.376953	0.410335	0.37216	0.451664	0.397174	0.410335	0	0.272036	-0.553318	0.23919	0.995015
ycjM	0.0186883	0	-0.51683	-0.393545	-0.349853	0.994693	-0.261541	-0.393545	-0.102006	-0.0401175	0	-0.514959	0
eutS	0.0461153	0	0.250091	-0.0145938	0	0.336763	0	0.643526	0.195751	0.994118	-0.589811	0.474922	0.991705
yhgA	0.131719	0	0	0	0	0.0154503	0.0108341	0	0.310932	0.992417	-0.291238	0.352066	0.281342
yjhV	0	0	0	0	0	0.164265	0.00291761	0	0	0.279429	0	0	0.992345
yejK	-0.0437469	0.882257	0.36582	0.52155	0.559072	0.973406	0.551217	0.515478	-0.190846	0.990949	-0.530016	0.593416	0.120734
ybl182	0.444823	-0.396254	-0.422436	-0.0984818	-0.430665	-0.45919	-0.253658	-0.431968	0.664439	0.460166	-0.516936	-0.334031	0.990813
yecH	-0.101665	0	0	0	0	0.20814	0	0	0.615088	0.990157	0.0023838	0	0
pepE	0.076953	0	0	0	-0.0565921	0	0	0	0.118419	0.989609	-0.606963	0	0.502396
sucB	-0.11479	0.356046	0.325102	0.356046	0.281159	0.328825	0.462158	0.356046	0.230593	0.989027	-1.02111	0.172131	0.961175
bfr	-0.0604078	0.450149	0.223234	0.320844	0.21929	0.98855	0.276777	0.320844	0	0	0	0	0
dnaN	-0.471815	0.987376	0.889765	0.918179	0.845822	0.960155	0.960155	0.987376	-0.934553	0.796419	0.051112	0.746318	0.407972
insAB-18	0	-0.321532	0	-0.321532	0	-0.208386	-0.348754	-0.321532	0	0	0	-0.152614	0.987231
rpoH	-0.354472	0	0.200672	0	-0.0719341	0	0	0	0.320899	-0.408416	-0.525038	-0.068053	0.986885
pal	0.714334	0.986579	0.888969	0.986579	0.845025	0.959358	0.959358	0.986579	0.722522	0.0524674	-2.92707	0.602665	0.602665
yncL	0	0	0	0.104112	0	0	0	0	0	0.986298	-0.702765	0.518096	0
gcvT	0	0.28918	0.26679	0.986261	0.704049	0.340542	0.416008	0.411821	0.318242	0.0278033	-0.343404	0.583375	0.351124
selC	0.0362029	-0.0481478	-0.0203375	0	0	0	0	0.163702	0	-0.0864063	0.385521	0	0.98454
fabZ	-0.66855	0.931588	0.724486	0.931588	0.755127	0.92136	0.857129	0.408672	0	0.984486	0	0.623746	0
sdaA	-0.465827	0.861728	0.76971	0.861845	0.782344	0.984313	0.836535	0.861845	-0.370303	0.124642	-0.800492	0.573699	0.416527
yncE	-1.04431	0.983925	0.886314	0.983925	0.84237	0.956703	0.956703	0.983925	-1.40969	0.160924	-1.33274	0.60001	0.60001
yliL	0.108273	0	0.294065	0	0	0	0	0	0.599572	0.983321	0	0.302275	0
ybhB	0.98237	0.249024	0.210026	0.249024	0.483592	0.227495	0	0.249024	0.55175	0.80042	-0.757556	0.312322	0.187678
pepA	0.287555	0.0826238	0.279131	0.0826238	0.0343027	0.0554023	0.114226	0.0826238	0.548189	0.170795	0.132512	0.027236	0.980913
php	0.0359134	0.563998	0.140937	0.0192499	0.214072	0.0313381	0.00859799	0.0192499	0.980592	0.671878	-0.70306	0.391221	-0.207708
hemH	-0.442841	0.496942	0.369675	0.406053	0.557069	0.355387	0.378931	0.471398	0.123701	0.980193	-0.511115	0.813385	0.684124
birA	-0.844532	0	0	0	0	0	0.316929	0	0.12166	-0.588759	0.124854	0	0.979988
mdtO	-0.960552	-0.0193095	-0.119013	-0.0193095	0.391812	-0.0645793	0.146355	-0.0193095	0.979747	0.0780844	-0.104808	0.153317	0.6569
ydjO	0	0.336904	0.587487	0.346765	0.108672	0.229183	0.239671	0.714638	0	0	-0.210517	0.101704	0.978775
yjcF	-0.433977	-0.441127	-0.539409	-0.441127	-0.511924	-0.397591	-0.466483	0.978678	-0.256344	-0.380568	0	-0.539999	-0.0693032
pepP	0	-0.131811	-0.0869933	0	-0.0743692	0	-0.0478881	0	0.434978	0	0.278583	0.240919	0.978297
garP	0.208537	0	0	-0.00101448	0.321175	-0.028236	0	-0.00101448	0.513051	0.978043	-0.336312	0.589418	-0.284929
pgaB	-0.429181	0.57832	0.680709	0.57832	0.636766	0.551098	0.751098	0.57832	-1.15784	-0.355792	-0.253782	0.394405	0.975783
insA-26	0.0523691	0	0	0	0.155185	0	0	0	0	0.240599	-0.0735237	0.975418	0.709242
trmJ	0.21849	-0.174151	0.210672	-0.174151	-0.0106454	0.973884	0.00100468	-0.174151	0	0.244226	-0.633161	0.0488287	-0.325633
uspG	0	0.117576	-0.104996	-0.0108115	0.0380224	0.105141	-0.00469964	-0.0108115	-0.0560906	-0.652247	-0.147249	0	0.973809
rihC	-0.0969402	0.034002	0	0.034002	0	0.973781	0.0281199	0.343397	-0.235183	0	0.203031	0	0
aldA	-0.0677759	-0.339939	0.168415	-0.339939	-0.359573	-0.367161	-0.367161	-0.339939	0.305683	0.536749	0.528459	0.0430082	0.973519
ybfM	-0.171834	0	0	0	0	0.114661	0	0	0.118312	0.973422	0.192736	0.107298	0.923499
yaaU	-0.278423	0.214563	0.0142586	0.191715	0.181411	0.973181	0.268862	0	-0.536821	0	-0.764888	-0.00441699	0.619598
trpB	-0.302999	0.247488	0.201024	0.25223	0.163307	0.578406	0.223795	0.243103	-0.574512	0.0680911	0.972087	0.379506	-0.131685
yfgD	0.135699	0.151897	0.276498	0.297887	0.256005	0.277531	0.356612	0.338358	0	0.447443	0	0.230546	0.971672
yjiH	0.192389	-0.29654	-0.233702	-0.297455	-0.13809	0	-0.107935	-0.297455	0.412933	0.971605	0.446723	0	0
ybiU	-0.481457	0.221455	0.123844	0.221455	0.290985	0.508727	0.194233	0.221455	0.20192	0.97079	0.121503	0	0.387307
pulF	0.174884	-0.0343497	-0.110741	-0.0343497	-0.145131	-0.0668533	-0.0556534	-0.0343497	0.96981	0.76156	-0.152299	-0.0882864	-0.334805
yggF	0	0.0862785	0.223877	0.0862785	0.0871932	0.0638767	0.0710506	0.0894975	0	0.966538	-0.347976	0.137227	0.578094
yciS	-0.147435	0	0.116467	0	-0.117726	0.323988	-0.00339348	0.192591	0.323655	0.965403	0.241706	0.202001	0
ygbI	0.132279	-0.160486	0	-0.11882	-0.0184007	-0.187708	-0.104375	-0.160486	0.965369	0.684291	0.172601	0.11795	0
rihA	0.130688	-0.00998868	0.336992	-0.00998868	0.963405	-0.027011	-0.0426141	0.117118	0.362557	0.449648	-0.571411	-0.101772	0.656841
ftsQ	-0.325762	0.146868	0.116922	0.0326779	0.00988002	0.120525	0.120525	0.146868	0	-0.121541	-0.797677	0.0334018	0.96264
fabR	0	0	0	0	0	-0.133197	0	0	0	0	-0.591453	0	0.9623
potH	0.47673	-0.206458	0	-0.206458	-0.1475	0.00764361	-0.25791	-0.206458	0.96219	0.493729	-1.19822	0.247208	-0.339328
era	-0.37151	0	0	0.0233727	0.476269	0	0.0687513	0.0233727	0	0	-1.0291	-0.137125	0.962059
cld	-0.160532	0.641715	0.555628	0.641429	0.702237	0.60618	0.549615	0.641429	-0.652639	0.151009	-0.496428	0.470042	0.96182
ydeH	-0.408393	-0.15215	-0.0807218	-0.00929328	0.203314	-0.00929328	-0.00929328	-0.00929328	-0.760725	-0.0892435	-0.738429	0.960954	-0.0390464
selB	0.0895279	0.15662	0.0393145	0.156679	0.265235	0.124052	0.129458	0.0875295	0.734062	0.960135	0	0.000808968	-0.227236
yqjH	-0.0568966	0.217535	0.463246	0.262311	0.146451	0.107032	0.250653	0.252908	0	0.0852393	-0.0130403	0.224905	0.95934
uxaB	-0.357862	0.454209	0.385721	0.419383	0.703865	0.339878	0.444894	0.321153	0.649942	0.958942	0.374152	0.795431	0
mpl	-0.691409	0.346326	0.110206	0.106862	0.39506	0	0.250979	0.128088	0	0.958937	-0.549713	0.018747	0
yraQ	0.290855	0.242756	0.165155	0.242756	0.290868	0.07623	0.173123	0.232734	0.259468	0	-0.897377	0	0.958536
ydgJ	-0.376556	0.567971	0.572825	0.484246	0.367321	0.481654	0.454774	0.621088	0	0	-0.852529	0.0843876	0.957402
yegV	-0.697382	0.286588	0.222128	0.267923	0.203361	0.268612	0.268612	0.956813	0.225197	0.46908	-0.6517	0.671703	0.350208
phnL	-0.162868	-0.445686	-0.399902	-0.193038	-0.359655	-0.489746	-0.4122	-0.402028	0	0.956122	0.371925	-0.0517214	-0.918302
mreD	0	-0.0925019	0	-0.0925019	0	-0.116059	-0.116059	-0.0732711	0.955851	0.161761	0	0.137362	0
lysW	0	0.187064	0.194205	0.208701	0.050416	0.955289	0.207573	0.208701	0	0	0	0.0251903	0.760656
hfq	-0.40226	0.118954	0.0242037	0.118886	0.446569	0	0.117887	0.118954	0	0.955002	-1.2602	0.428959	0
codB	-0.0749432	0.00244232	0.090927	0.00983463	0.642113	0.360553	0	0.00574468	0.680979	0.954897	-0.546761	0.0877794	0.725075
ybiC	-0.106601	-0.29978	-0.384442	-0.29978	-0.195147	-0.279382	-0.327001	-0.29978	-0.00073815	0.954877	-1.10142	0.0220014	0.0509056
yeiW	-0.420381	0.516607	0.0774461	0.208286	0.435918	0.222903	0.186665	0.208286	0	0	-0.109806	0	0.954085
rpmI	0	-0.323382	-0.254326	0.37475	0	-0.350603	0.953	-0.323382	0	0	-0.572145	0.114646	0.0227997
ybaL	-1.19604	0.952691	0.835253	0.943182	0.785625	0.921206	0.908744	0.945537	0.353554	0.633529	-0.520687	0.828834	0.380958
valW	0.276929	0.498961	0.498961	0.498961	0.498961	0.498961	0.498961	0.498961	0	0.475397	-2.04899	0.498961	0.952519
yraH	-0.24925	-0.0979668	0	-0.0938324	0	-0.0844059	0	-0.0979668	0	0.00319517	0	0	0.952365
sgcR	0.0350963	0	0	0	0	0.776912	0	0	-0.692926	0.952342	-0.680334	0.218655	0
cstA	0.952182	0.339653	0.272992	0.339653	0.163042	0.321062	0.321062	0.339653	0	-0.104559	0.800449	0.166798	0.724181
yrhC	0.951554	-0.073462	0	-0.073462	0	-0.15667	-0.188582	-0.073462	0.22989	0.861892	0.803782	0	0
ybl218	0.338282	0.650544	0.552934	0.650544	0.63399	0.748323	0.623323	0.650544	-0.0824971	-0.09898	-0.628779	0.266629	0.951408
purH	-0.484895	-0.440174	-0.137785	-0.440174	-0.581728	-0.467395	-0.467395	-0.440174	-0.173734	0.0257142	0.950918	-0.224089	-0.307096
hokE	0	-0.750386	-0.847997	-0.750386	-0.89194	-0.777608	-0.777608	-0.750386	-0.295099	-1.6791	0.950676	-1.1343	-1.1343
nagA	-0.139016	0.258986	0.458291	0.268063	0	0	0.324067	0.599292	0.311551	0.950311	-0.180426	0.293347	0.469354
nfuA	-0.136812	0.104219	0	0.0184822	0	0.416496	0	0	-0.163768	0.950106	-0.183847	0	0.716212
ligT	-0.0373887	0.0589136	-0.058281	0	0	0	0	0	-0.276894	-0.357976	0.286484	-0.146454	0.950013
yqgC	0	0.0449202	0.411189	0.00054614	0.0579548	0	0	0.00054614	0.047385	0	-0.0403117	0	0.949537
rluE	0	0.529809	0.456817	0.528902	0.442422	0.64284	0.573488	0.597844	0.0908061	0.631033	0.0138641	0.949495	0.678938
queD	0	0.236388	0	0	0.109263	0.628907	0	0	0.878785	0.949293	-0.584865	0	0.722536
ugpE	0.284766	0.199881	0.168311	0.199881	0.141661	0.0703312	0.214327	0.199881	0.29279	0.250974	-0.573467	0.300248	0.948445
rpmH	0	0.541091	0.508749	0.473711	0.461212	0.532072	0.532072	0.541091	0	0.947489	0	0.579223	0
fepE	0	-0.0370184	-0.0558417	-0.0370184	0	0.148836	-0.0600688	0.947268	-0.175704	0.118468	0.0825481	-0.119711	0.790025
pncA	0	0.946917	0	0	-0.0273761	-0.0378858	-0.0378858	0	0.391946	0.0112122	-0.166275	0.423974	0.24678
bcsZ	-0.36317	0.421957	0.471261	0.385875	0.254536	0.360618	0.40701	0.946435	-0.569821	0.177185	-0.997262	0.656847	0.212511
rhtA	-0.0902565	0.134954	0.168963	0.220948	0.175035	0.946412	0.315789	0.221933	-0.390282	-0.0321533	0	0	0
ycjP	-0.423857	0.173393	0.263827	0.252193	0.329531	0.299891	0.198704	0.181867	0.370773	0.94629	-0.421633	0	0
yejA	0.0569431	-0.0228491	-0.0204599	0.946151	-0.164403	-0.0500706	-0.0500706	0.0771509	-0.088253	-0.192576	-0.223606	-0.248268	0
ybl3_2	0	0	0	0	0.106263	0	0	0	0	0	0.945631	0.344665	0.331672
coaA	-1.15895	0.729192	0.631581	0.729192	0.587638	0.701971	0.448427	0.729192	-0.0480334	0	0	0.945277	0.706677
fadI	-0.00366002	0.037882	0	0.037882	0.0835435	0.0798048	0.0264204	0.037882	0.445673	0.944709	0.00535786	0	0
yqcG	0	-0.10896	-0.0954596	-0.10896	0.113709	-0.136181	-0.136181	-0.10896	0	-0.563201	-0.855045	0.0691463	0.943969
mdtK	0.129483	0	0.0322324	0.129843	-0.0117109	0.0562014	0.102622	0.129843	0.0139632	-0.804269	0.943859	0.0520984	-0.254072
poxB	0.0154147	-0.183475	-0.0130966	-0.183475	-0.0689604	-0.0260562	0.112701	0.352228	0.445837	0.943733	-1.07219	-0.187252	-0.148963
nagB	-0.561324	0.163075	0.0531832	0.15827	0.943328	0.596014	0.101399	0.551148	-0.451265	0.548508	-1.51038	0.302126	0.280648
kefB	0	0.181774	0	0.213024	0	0.168048	0.253484	0.213024	0.943173	0	0	0	0.0677374
mcbR	-0.0467947	0.0511733	0.218459	0.0469725	0	0.0243204	0.0433052	0.0458469	-0.251865	-0.141676	-0.0301662	0	0.942488
yaeR	-0.275503	0	0	0.251585	0	0.941287	0.204319	0	0.299718	0.305142	0	0	0
cusR	-0.0932926	-0.0885083	0	-0.0899798	-0.124921	0	0.22516	0.0443226	-0.717257	-0.742089	-0.43699	-0.137953	0.93978
ybl32	-1.33668	0.282921	0.352207	0.31407	0	0.522889	0.242665	0.227419	0	0.167309	-0.591576	0.104924	0.939733
anmK	-0.241837	0.428951	0.493278	0.428951	0.283415	0.93952	0.412377	0.431438	0	0.0365999	-0.355681	0.174168	0.364779
ykgB	-0.391132	0	0	0	0.0769225	0.313596	0.0143205	-0.0647403	-0.136756	0	-0.234228	0.136944	0.939196
yhiM	-0.113156	-0.21327	-0.186182	-0.199169	0	0	-0.472786	-0.485564	-0.11025	-0.180472	0.141549	-0.315036	0.938457
dpiA	-0.361802	0.938154	0.211085	0.328914	0.140002	0.347843	0.316714	0.363913	-0.266113	0	-0.387366	0.524061	0.718045
rcsF	-0.544052	0.800736	0.800736	0.800736	0.820344	0.907784	0.663481	0.800736	0	0.392594	-0.0537959	0.911649	0.938009
phoQ	-0.394368	0	0.228053	0.0239608	0	0.151928	0	0	-0.487922	-0.398102	-0.11846	0.0448947	0.937974
yghT	0	0	0.175195	0.325364	-0.0636362	0.0364378	0.321061	0	-0.0667906	0.748086	0.144797	0.106765	0.937836
ybl186	-0.40424	0.248306	0.436569	0.182563	0.151041	0.758067	0.254797	0.225305	0.59691	0.937686	-0.012998	0.0808356	0.535063
gudD	-0.312403	0.163702	0.128591	0.163702	0.208562	0.406601	0.13648	0	0.141973	0.937274	-0.240686	0.00862592	0.0270362
ydjE	-0.261002	0	0.320118	0.202315	0.276175	0.175094	0.258427	0.202315	0	0	-0.833735	0	0.936462
etk	-0.582477	0.936156	-0.111317	-0.0137061	-0.15526	-0.0409275	-0.0409275	-0.0137061	0	-0.256215	-0.0691196	0.114516	0.912115
ybjS	-0.0934968	0.296152	0.164536	0.296562	0.322447	0.594753	0.275889	0.34428	0.471879	0.817463	0	0.254084	0.934972
lyxK	-0.830792	0.131168	0	0.0949656	0.324186	0.934868	0.107071	0.243121	-0.64031	-0.4056	-0.454455	0	0
glxK	-0.0483678	-0.140174	-0.176701	-0.140174	0.0838136	-0.125024	-0.125024	-0.143585	0	0.257523	-1.06262	-0.295834	0.9342
leuO	0	0.449212	0.574686	0.477018	0.463078	0.454095	0.454095	0.477018	-0.463726	0.619556	-1.53993	0.576436	0.933763
yhhA	0	0.0427073	-0.231668	-0.18774	-0.317772	-0.205452	-0.135452	-0.18774	0	0	-0.554063	-0.315074	0.933447
yjaZ	-0.248643	-0.347894	-0.436476	-0.347894	-0.312977	0.00557711	-0.375115	-0.347894	0	0	-0.130336	-0.246584	0.933234
yeaL	0	0	0	0	0	0.0509448	0	0	0.167743	0.889713	0	0	0.933124
yceQ	-0.313232	0.427854	0.343407	0.427854	0.49282	0.483224	0.386868	0.427854	-0.847243	0.932857	0	0.288427	0.261344
gspM	0	0.0458558	0	0	0	0	0.129195	0	-0.0561395	-0.0985775	0	0	0.932363
yjiQ	0.0224165	0	-0.218295	-0.120685	-0.195572	-0.147906	0	-0.120685	0.197301	0	0	0	0.932199
luxS	0	0.341606	0.358063	0.26127	0.206749	0.813017	0.320449	0.341606	-0.153614	0.00863187	-0.510255	0	0.931583
gadB	-0.182508	0.13267	0	0.616882	0.141029	0.931164	0.108304	0.13267	-0.216714	0.21841	0.197249	0.14606	0.544465
zinT	0	0.317677	0.2204	0.358849	0.0935368	0	0.396418	0.317677	0	0.930327	0	0.410548	0
ybhJ	0	0	0	0	0	0	0	0	-0.176811	-0.102431	0	0	0.930278
yohGH	-0.614593	0.19799	0.408072	0.19799	0.287205	0.929909	0.168756	0.19799	-0.175773	0	0.423629	0.392982	0
hscC	0.0443171	-0.311971	-0.420788	-0.311971	-0.242509	-0.334592	-0.220969	-0.135494	0.928984	0.843695	-0.248434	0.647607	0.400211
yhjD	0	0.01017	-0.0585853	0	0.399527	0.451085	0	0	-0.402235	-0.26569	-0.18311	-0.146434	0.928893
bamC	0.465378	-0.165598	-0.120835	-0.207125	0	0	-0.199789	-0.209605	0.70203	0.928694	-0.4275	0	0
ydfJ	0.0111146	0	0.0401128	0.053987	0.107321	-0.053973	-0.0214546	0.0086356	0.928471	0.916989	-0.229679	0.767251	0.707318
tolC	0.25814	0.129215	0.0134039	0.92847	0.107398	0.0950653	0.199	0.129215	0	-0.493457	-0.543854	0	0
cycA	0.100945	0.0239911	0	0.0562648	0	0.928352	0.0393843	0.00839975	0.211352	-0.116758	-0.00738402	-0.0544254	0
yiaV	0.205841	0	-0.0869257	-0.0757932	0	0	-0.0429445	-0.0454858	0.928247	0.0454947	-0.152136	-0.282249	0.111544
ydiE	-0.546906	0	0	0	0.183901	0	0	0	-0.335554	0	-0.616542	0.186896	0.927848
rffT	-0.0134666	-0.0417302	0.113736	0.0959656	-0.0157435	0.231586	-0.0402014	-0.0660669	0.159779	0.38007	0.111562	-0.139654	0.927796
mtlD	-0.397277	0.492436	0.40547	0.927457	0.302753	0.237446	0.518963	0.442619	0.881233	0.307334	-0.318467	0.359116	0.646335
yecR	-0.109461	0.138404	0	0	0	0	0	0	0	0	-0.341523	0	0.927181
asnU	-1.3978	0.609216	0.518112	0.675882	0.493431	0.583809	0.583809	0.693601	-1.18475	0	-0.527261	0.309686	0.925849
ybl75	0.0518228	0	0.170372	0.115435	0.16035	0	0.0928107	0.115435	0.0572011	0.9256	-0.271058	0.20566	0.316327
argH	0	0.116915	0.0859706	0.116915	0.342784	0.925589	0.283973	0.116915	0.444179	0.45689	-0.173737	0.219837	0.796892
exbD	-0.0215078	0	0	0.0421313	0.0682125	0.0198003	0.0150175	0.0454245	-0.238293	0.0603907	-0.107165	0.137679	0.925392
secM	-0.03577	0.21275	0.568134	0.21275	0.456816	0.185528	0.185528	0.21275	0.148279	0.925113	-0.870445	-0.00960521	0.248475
map	-0.156149	0	0	0.00681516	0	0.432391	0	0	-0.285065	0.810299	0	-0.0384768	0.924655
ycfJ	0.276928	0.0119392	0	0	0	0	0	0	-0.0766407	0.923059	0	0.183114	-0.0702515
mglB	0.0347757	0	0.214586	0	0.707785	0.92296	0.137134	0	0	-0.228225	0	0.206292	0.417905
yahD	-1.33548	-0.085327	0.26661	-0.085327	-0.113572	0.280824	-0.0621041	-0.085327	-1.19983	-0.667452	-1.63063	-0.0820592	0.922739
uraA	-0.621721	0.214605	0.156242	0.218062	0.0183081	0	0.203984	0.291173	0.0102781	0.172413	-0.533512	0	0.922717
pepQ	0.33532	-0.0732927	0.377868	-0.0732927	-0.0971998	-0.100514	-0.100514	-0.0732927	0.883547	0.922627	0.00617053	0.395816	0.304053
yccT	0.0530463	0.173346	0	0.173346	0.233075	0.259739	0.225989	0.173346	0.922381	0	0	0.773434	-0.0765146
ulaB	0	0.136892	0.203195	0.165879	0.128947	0.253378	0.264949	0.160148	0.273792	0.922367	0	0	0.0288273
racC	-1.28436	0	0	0	0	0	0	0	-1.43267	0.922362	-0.892578	0.133216	0.194901
rpsO	-0.745771	0.784075	0.37966	0.470172	0.393458	0.554021	0.922287	0.556624	-0.121415	0.716079	-0.377134	0.721458	0.376049
csgE	0	0	0	0	0	0	0	0	0	-0.494702	-0.134937	0	0.922273
phnF	0.105314	0	0	0	0	0	0	0	0.921701	0	-0.149882	0.0949726	0
speD	0	0	0	0	0.652841	0	0.0731399	0	0.395258	0.851839	0	0	0.921431
sspA	-0.48601	0.486155	0.265725	0.390926	0.010295	0.19348	0.405804	0.352821	0	0.570363	-0.0831492	0.614305	0.920852
hycF	0	0.00777047	0	0	0	0.0103272	0	0	0.353822	0.920717	0.0557233	-0.0164743	-0.188634
arpB_1	-0.29965	0	0	0	0	0.357133	0	0	-0.0940035	0.209357	0	-0.0802792	0.920608
atl	-0.321457	0.37993	0.259945	0	0.135591	0	0	0	-0.163177	0	-0.0244625	0	0.920067
rmuC	-0.296619	0	0.162657	0	0.640054	0	0	0	-0.220845	0.517231	-0.556868	0.0793615	0.919908
leuC	-0.41408	0.223506	0.342286	0.919885	0.145599	0.275701	0.171532	0.438039	0.659489	0.129025	0.302445	0.368669	0.520083
glcE	-0.361681	-0.157725	0	-0.000825754	0	0.156799	0	-0.123048	0.322215	0.380681	0	0.310876	0.919713
yedV	0.0691112	0.294501	0.324087	0.294501	0.305886	0.26728	0.26728	0.294501	-0.4021	0.163237	-0.131924	-0.058718	0.919123
yeaD	0.518875	-0.0381114	-0.0690555	-0.0381114	-0.00733467	-0.0653328	-0.0653328	-0.0381114	0.527131	0.458477	0	-0.222026	0.917808
pspA	0	0	0	0	0	0	0	0	0.917735	0.532587	0.247146	0	0
rffG	-0.374649	0.371071	0.00794316	0.0950734	0.0374888	0.0707747	0.0761601	0.914501	0.708431	0.917298	-0.808402	0	0.154092
gshB	0	0.916726	0	0	0.0177079	0.685827	0	0	0.407833	0	-0.371235	0	0
proB	0	0.0414371	0	0.0414371	0.209704	0.289874	0.327738	0.00544272	0.450094	0.915736	-1.06931	0	0.0630702
argP	-0.541116	0	0	0	0	0.00148233	0	0	-0.348381	0.0262127	-0.0236168	0.0606349	0.915411
xylE	0.915385	-0.0320716	0.269308	-0.0327079	0	0.56345	0	-0.0223987	0.599937	0	-1.33425	0	0.36418
lepA	0.213637	0.915228	0.842565	0.902264	0.897987	0.903556	0.8277	0.902264	0.027918	0	-0.107059	0.0583146	0.653936
yqiI	0	0.914527	0.0952633	0.320265	0.52506	0.41679	0.344126	0.12327	0	0	0	0.287369	0.46737
hemN	0.120221	0.32934	0.342257	0.32934	0.222717	0	0.413379	0.295826	0	0.913929	-0.186149	0.535044	0
yagW	-0.476391	-0.247919	-0.34553	-0.247919	-0.289473	-0.275141	-0.275141	-0.247919	0.913676	-0.171851	-0.757075	0.582886	0.221693
yciX_1	0	0	-0.169334	0	-0.12217	0	0	-0.159235	-0.282168	-0.42741	0	-0.0845757	0.913225
ybjJ	-0.0799295	0	0.10187	0	0	0	0	0	-0.328649	-0.316016	0	0.164946	0.913208
dusC	0.0127995	-0.289618	-0.0915662	0.111098	0	-0.1172	-0.261284	-0.289618	0.91316	0.494894	-0.0278368	0	0
fepD	0.0489827	0.231682	0.250297	0.301265	0.0896101	0.4902	0.206585	0.287256	0.164376	0.447724	-0.882688	0.233776	0.913101
icd	0	0.508291	0.452119	0.50864	0.414027	0.437596	0.461663	0.482124	-0.714433	0	-0.332869	0.137594	0.912449
ybfK	0.0801575	-0.0183849	0	0	0	-0.0163644	0	-0.0183849	0	0.911462	0.0770044	-0.0271627	0.233074
yneN	0	0.606748	0.249373	0.209724	0.21145	0.342	0.182503	0.209724	-0.251869	0.608555	0.0258231	0.143619	0.91047
fhuB	-0.0517333	0.133933	0.21002	0.075699	0.396345	0.076911	0.0435952	0.138568	0.37619	0.909415	0.0265878	0.21743	0.108227
matP	-0.353298	-0.164314	0	-0.164314	-0.305869	-0.191536	-0.108203	-0.164314	0	0	-0.933817	0	0.909373
dam	-0.0856709	0.547571	0.456011	0.535963	0.582147	0.908879	0.562711	0.538941	-0.0917239	0.587824	0	0.552386	0.230633
ybl194	0.11283	0.443152	0.28727	0.36651	0.159971	0.625638	0.347435	0.376016	0.908632	0	0.433751	0.399426	0.0922726
yecA	0.811452	0.908577	0.0125861	0	0	0	0	0	0.349252	-0.0255351	-0.633824	0	0
csrA	-3.27056	0.908577	0.810966	0.908577	0.767023	0.881356	0.881356	0.908577	-1.12102	-0.0255351	-3.00507	0.524662	0.524662
pyrL	-0.205232	0	-0.0955736	-0.0447466	-0.0683862	0	-0.0202794	-0.0447466	0	0	0	0	0.907812
murF	-0.499497	0	0	0.00472582	0	-0.0114072	0	0	0	0.907291	-0.633133	0.120812	0.800699
cydC	0.00145886	0	-0.0271107	0	-0.0849878	0.0886399	0	-0.0481816	0.517925	0.578095	0.434168	0	0.907209
ybcS	0.483104	-0.0321674	-0.389567	-0.0321674	0	-0.0560641	-0.304156	-0.0321674	0.906726	-1.07758	0	0.324129	-0.675871
cusC	-0.290878	0.243402	0.434658	0.451951	0.0329433	0.906653	0	0	-0.254508	-0.202186	0.0320158	0	0
tdh	-0.57648	0.256181	0.121137	0.255934	0.177449	0.892319	0.837381	0.294843	-0.184173	0.154813	-0.773625	0.347604	0.905544
tnaA	-0.0311641	0.4479	0.465094	0.372363	0.221674	0.905478	0.415821	0.4479	0.755902	0	-0.27802	0.556677	0.627198
nuoA	-0.448356	0.328468	0.180209	0.328468	0	0.301246	0.301246	0.328468	-0.276301	0.880833	0.905378	-0.055447	-0.055447
recE_2	0	0.123262	0.0801066	0.123262	0.454811	0	0.0790503	0.123262	0	0	0	0	0.905253
ybl157	-0.307347	0	0	0	-0.243024	0	0	-0.221044	-0.183786	0.290967	0	0.294248	0.905106
yohJ	0	0	0.171777	0.00890072	0.143329	0.00828563	0	0	9.65485e-05	0.904812	0	0	0.697201
ycbU	0	0	0.10882	0	0	0	0.0278553	0	0	0.163537	0	0	0.904425
aroM	0	0	0	0	0	0	0	0	0	0.904391	-0.875532	0.254615	0
arnD	-0.0384738	-0.115491	-0.139028	-0.0567889	-0.0753087	-0.14082	-0.14082	-0.115491	0.33319	0.903938	-0.0972571	0.417826	0
yibT	-0.0611113	0	0	0	0	0.180636	0	0	0	0.903563	0.204174	0	0.494881
gatD	-0.374099	0	0	0	-0.214727	0	0	0	0.903035	0.766203	-0.663162	-0.0754463	0.331559
minD	-0.780105	0.876896	0.779285	0.876896	0.902009	0.639078	0.849675	0.876896	0.0807683	0.109451	0	0.492981	0
narH	-0.519442	0.0861038	0	0.0833422	0	0.0671216	0.0319402	0.0861038	-0.342909	0.901918	-0.601718	0.0393872	0.411473
fucO	0	0	0	0	0	0	0	0	0.00296997	-0.381256	-0.168853	0.901916	0.175272
ybeZ	0.0497852	0.552298	0.84468	0.552298	0.481858	0.546668	0.542216	0.549656	-0.205893	0.90104	0.364816	0	0.294351
yidL	-0.0222046	0	0	0	0.0282508	0	0	0.294452	0.681799	0.900852	0.745869	0.0957406	0.247738
lolD	-0.0200046	-0.286066	-0.148044	-0.28449	0	-0.310686	-0.311818	-0.28449	0.0728074	0.900831	-0.345468	0.470111	0.177897
rpmB	0	0.803542	0.900827	0.803542	0.589573	0.756369	0.77632	0.803542	-0.373191	0	-1.12779	0.469981	0.300216
ybl221	-0.882767	0.530991	0.900383	0.530991	0.344825	0.507957	0.507957	0.530991	-1.14798	0.0618982	-1.62185	0.156429	0.210492
entS	0.205967	-0.0911031	-0.122047	0	0.00136211	-0.118325	-0.118325	-0.0911031	0.900065	0.668203	0.285052	0.0943201	0.199513
lysC	-0.225082	0	0.0300689	0	0	0	0.0351207	0.899523	0	0.304982	0.755646	0	0
ydjK	0.683218	0.255671	0.422612	0.223921	0.12929	0.517231	0.205034	0.224416	0.279734	0.539737	-0.227209	0.0741718	0.899367
coaE	-0.31468	0.26932	0.498666	0.202181	0	0.240001	0.188968	0.202181	0	0.139959	0	0.239178	0.899174
rffE	-0.497197	0.36425	0.299489	0.126352	0.349855	0.334052	0.344709	0.364368	0	0	-0.715682	0	0.898936
rbsB	-0.0574247	0	-0.255459	-0.253079	-0.220366	-0.2803	-0.2803	-0.253079	0.0302175	-0.00993472	0	0	0.898671
yhbS	-0.575141	0.488306	0.295538	0.450219	0.236021	0.43817	0.526694	0.450219	0	0.898492	0	0.73592	0.428976
csiD	0.261181	-0.0570503	0	-0.0570503	0.0676071	-0.0842718	-0.0842718	-0.0570503	-0.469679	-0.143786	-0.951783	-0.082469	0.897602
yjeF	-0.044853	0	-0.0479713	0	-0.0919147	0.200705	0	0	-0.0317158	0.100194	-0.457619	0.319977	0.897514
ade	-0.0792996	0.774669	0.663473	0.774669	0.897273	0.755274	0.752802	0.774669	-0.157863	0.503656	-1.4738	0.688342	0.897279
vacJ	0	0.897149	0.683046	0.650037	0.528394	0.637419	0.614546	0.650037	-0.270189	0.0197818	-0.0439328	0.38058	0.584208
cysQ	-0.185867	0.100096	0.0847627	0.0920386	0.328169	0.0720203	0	0.102738	0.427786	0.493918	0	0	0.896347
yjiJ	-0.318092	0.118836	0.0812836	0.139179	0.169402	0.111958	0.167513	0.139179	-0.0599117	0.0768038	0.264208	0.896144	0.340711
yccB	0	0.201906	0	0.0821613	0	0.0993915	0.0167848	0.0792253	0	0	-0.296563	0	0.895688
malF	0.14992	0.154696	0.0722811	0.0889069	0.00346945	0.895274	0.0542584	0.0889069	0.69216	0.0833189	0.138016	0	0
xylG	-0.65236	0.593336	0.51001	0.593336	0.460302	0.570099	0.895117	0.593336	0	0.124924	-0.035163	0.552547	0.622744
yagQ	0	0	0	0	-0.09739	0	0	0	0.136173	0.894681	0	-0.0414859	0.415507
nrdA	0.159839	-0.199083	-0.362524	-0.199083	-0.317817	-0.352436	-0.246932	-0.199083	-0.398011	-0.759327	-0.702156	-0.312889	0.893659
yjiP	0	0.341827	0	0	0	0	-0.0962767	0	0.893032	0.00629631	0	0.800781	0
ycaD	-0.236831	0.218699	0.179911	0.218699	0.0771445	0.0269692	0.191477	0.277522	0.508802	0.193679	-0.484588	0.0112542	0.892213
mlaD	-0.335035	0	0	0	0	0	0	0	0	0.305207	-0.990642	0	0.892165
ybdL	0.0430916	0.31039	0.166496	0.246181	0.181288	0.232198	0.296407	0.680556	0.723883	0.891423	-0.884526	0.680755	0.554261
lptG	-0.0925564	0.34818	0.518771	0.193042	0.514711	0.159365	0.242936	0.193152	0.129977	-0.386015	-0.642046	0.204538	0.890234
maeA	0	0.144201	0.137499	0.0390706	0.00144323	0.132012	0.126743	0.144974	0	-0.0656538	-0.402181	0.0965503	0.889444
yegK	-0.308901	0.0908642	0.0747824	0.221142	0.0603097	0.888638	0.144378	0.0908642	-0.291896	0.0369966	-0.0223884	0.0413808	0
pdxY	-0.575633	0	0	0	0.0462914	0	0	0	0.533323	0.888574	0	0.0121451	0.187572
yicC	0.0482631	-0.0955762	-0.147732	-0.0955762	-0.146221	0	-0.0773431	-0.0955762	0.382653	0.112883	-0.377535	-0.063199	0.888494
ykgM	-0.124717	0.4065	0.247433	0.4065	0.499283	0.454062	0.46725	0.4065	-0.258622	0.88844	-1.05021	0	0.129262
hyfR	0	0.250296	0.00372815	0.262214	0	0.137956	0.0214109	0.121671	0.159936	0.886605	-0.926158	0.273082	0.395485
ydfU_1	0.341788	0	0	0	0	0	0	0	0	0.885975	0	0	0
mngR	-0.223259	0.0257634	0.305935	0.0410975	0	0	0	0.885126	-0.955359	-0.379313	-0.0403929	0	0
rffC	0	0.769375	0.197959	0.28637	0.206464	0.261714	0.326002	0.33619	-0.238878	0.258289	-0.588301	0.0317075	0.884983
ybeF	-0.551922	0.198074	0.281862	0.0987236	0	0.382744	0.0726605	0.162553	-0.552834	0.341495	-0.817525	0	0.88495
gntK	-0.42055	0.0920388	0.0803658	0.0610434	0	0	0.884916	0.0920388	0.397097	0.356798	0	0.0567258	0.577698
malX	0	0.848883	0.728699	0.884447	0.729818	0.698705	0.868506	0.850996	0	0.142078	-0.105998	0.510432	0.425366
ybl37	-0.256318	0	0	0	0.48055	0	0	0	-0.473573	-0.465177	0.154517	0	0.884354
yheM	0	0	0	0	0	0	0	0.883783	0.372257	-0.281473	0	-0.0763982	0.327273
ybl153	-0.259823	-0.16155	-0.20961	-0.16155	0.882822	-0.250332	-0.178833	-0.0691135	-0.139369	-0.649102	-0.975577	0.591249	0
qor	-0.362557	0.29613	0.228625	0.326235	0.0886781	0.298966	0.340681	0.882565	-0.158214	0	-0.792125	0.250334	0.680697
motA	0.095306	0	0.0714842	0	0	0	0	0.0906942	-0.303833	-0.00559632	0.152701	0	0.882017
yggM	-0.025232	0.150319	0.439352	0.138065	0.283292	0.115668	0.112894	0.197455	0	0	-0.0878865	0.881817	0
trg	-0.100703	0.338246	-0.146399	-0.227398	-0.247032	0.74806	0.454523	-0.227398	0.340034	0.881224	-0.136452	0.217633	-0.0737217
pldA	-0.155966	0	0.0760007	0	-0.132862	0.345253	0.205277	0	0	-0.465004	-0.736939	0	0.880997
yaiL	0.283858	0	-0.0161881	-0.0275619	-0.0293382	0	-0.0708663	0	0	0	0.247754	-0.185731	0.880513
potC	0	0.156415	0	0.196237	0.208659	0.125528	0.121724	0.195226	0.880238	0.845399	0.205781	0.65276	-0.0886661
yidQ	0	0.323026	0.390691	0.15157	0.178037	0.296298	0.134441	0.145433	0.421851	0	0	0.22594	0.880175
gfcD	0.397496	0.813116	0.799596	0.879696	0.760665	0.861946	0.805117	0.873488	-0.930578	0	-0.110272	0.716514	0.744567
pulG-2	0	0.31652	0.257105	0.31652	0.317313	0.29995	0.41234	0.163778	0	0.445316	-1.44903	0.543353	0.879586
ygfQ	-0.210181	0.388861	0.449266	0.452598	0.513101	0.879234	0.355672	0.382151	-0.0615475	0	-0.670561	0.0738453	0
mglA	0	0.803408	0.626092	0.803408	0.325327	0.401326	0.728753	0.878791	-1.06614	0.0456685	0.194602	0.343244	0.142596
sufS	0.229175	-0.376567	0	-0.390821	-0.283951	-0.529965	-0.406458	-0.390821	0.878265	0	0	0.201875	0.145389
dppF	0	0.00146164	0	0	0.240169	0.483325	0.0264493	0.441398	0.440923	0.878147	-0.706966	0.120033	0
potG	0.294991	0.181555	0.363025	0.481824	0.0464659	0.877383	0.178218	0.196024	0.129486	0.300009	-0.502185	0.225983	0.332135
ydiI	0	0.291654	0.17881	0.291654	0.13084	0.350027	0.268253	0.313831	0.23719	0.607457	0	0.6201	0.876968
rfe	0	0.211851	0.389246	0	0.206573	0.27582	0.191717	0.217368	-0.225927	0.0043544	0.0747134	0.211556	0.876383
yghD	0	0.0729309	0.0426543	0.0729309	0.192166	0.0274575	0.0320809	0.224656	0.0232726	0.875741	-0.423513	0.177524	0
manY	-0.455481	0.625546	0.169653	0.625546	0.493015	0.607348	0.607348	0.634569	0	0.875567	-0.452931	0.457902	0.250654
yohD	0.369667	-0.0610858	-0.0341742	-0.0610858	-0.140249	-0.0820554	0.0261645	-0.0754398	0.675825	0.875542	-0.12143	0	0
yjjU	0.190331	0.384224	0.3078	0.384224	0.265345	0.458298	0.359453	0.384224	0.875264	0	-0.145937	0.0604111	0
araG	-0.662791	0.203848	0	0	0	0	0	0.520337	0	0.436238	-0.640735	0.200778	0.874519
fhuD	0.50336	0.0740252	0	-0.0292055	0	0.182431	-0.0876033	-0.0292055	0.874294	0.740549	0.1714	0	0.0338556
yiaM	0.000467058	0	0	0	0	0.256695	0	0	0.857193	0.873292	0	0.611992	0
insB-16	0	0	0	0	0	0	0	0	0	0	0	0	0.873084
aas	-0.0761045	0.0857114	0.113101	0.0857114	0.0691572	0.348731	0.18349	0.0857114	0.871707	0.450639	-1.62583	0.763278	0.555908
asmA	-0.152528	0	0.150462	0.0433572	0.109324	0.134492	0.101742	0.0258036	0.871464	0	-0.581154	0.157179	-0.283738
ibpB	-0.160541	0	0	0.058588	0	0.0577848	0.043663	0.0615214	0	0	0.362401	0.200542	0.871464
recN	-0.0382142	-0.639072	-0.625572	-0.639072	-0.780626	-0.666293	-0.555182	-0.639072	0.690647	0.631472	-0.275465	0.126262	0.871326
rpsP	0	0	0	0	0	0	0	0	-0.683832	0.870703	-1.62419	0.0208148	0
gsiB	0	0.0718734	0.121662	0.248232	0.229577	0.139052	0	0.0850313	0	0.590578	-0.189489	0.177773	0.87032
acrA	0	0.513757	0.47497	0.513757	0.869817	0.486536	0.486536	0.513757	-0.188529	0	-0.590838	0.316309	0.0568031
phoA	-0.204627	0.13312	0.252559	0.221174	0	0.375787	0.0944943	0.13312	0.0888127	0.86957	-0.166446	0	0.0357735
gshA	0.0595241	0.835	0.727104	0.868959	0.777732	0.513147	0.821002	0.835	0.333557	0.0144356	-0.880854	0.600479	0
yieL	-0.722594	0.868655	0.384419	0.406104	0.34593	0.358629	0.372638	0.413478	0.241483	0.306849	-0.227748	0.254164	0.225414
yegH	-0.00464942	0.287963	0.243301	0.284628	0.259919	0.449239	0.252915	0.285978	0.868637	0.862225	-0.624873	0.32157	0.788478
selD	-0.356913	0	0	0	0	0	0	0	0.199453	0.868229	-0.869387	0	0.177934
yijO	0	0	0.0149131	0	0	-0.0827529	0	0	0.265896	0.868146	0	0	0.396159
yfhA	0.157749	0	0	0	0	0.495413	0	0	0.254151	0.867862	-0.60037	0	0.106699
bcp	0	0.439858	0.395675	0.439858	0.867165	0	0.435979	0.195491	-0.415946	0	-0.610662	0.134098	0
ycjV	0	0.521543	0.867038	0.83956	0.284058	0.619096	0.557562	0.579487	-0.56615	0.487265	0	0.688752	0.495648
ygfO	-0.435902	-0.273096	-0.370707	-0.273096	-0.297003	-0.300318	-0.241494	-0.273096	-0.313885	-0.00728229	-0.0616345	-0.238395	0.866681
dacC	-0.321691	0.348228	0.458596	0.3455	0.490614	0.280605	0.0332063	0.360606	0.0866416	0	-1.13825	0.168637	0.865232
yfeD	-0.322921	0	0	0	0	0	0	0	-0.143638	0	0	0	0.864886
lysU	0.0709746	0.776549	0.803938	0.729927	0.634994	0.749327	0.749327	0.776549	-0.368567	0	-0.778937	0.864543	0.5414
fbaB	0.0311276	0.579395	0.257908	0.231432	0.0683187	0.20075	0.356839	0.222221	0.273787	0	0.00369367	0	0.864492
ynfK	0	0	0	0	0	-0.0108055	0	0	0.218092	0.0776178	0.864413	0.222159	0
nrfF	0	-0.426193	-0.170289	-0.476324	-0.430722	-0.02329	-0.45476	-0.480506	0.863381	0.155524	-0.168849	0	0
aroG	-0.0139509	0.0227219	0.863195	0.0195066	0.278092	0.00718767	0.0428272	0.0195066	-0.305232	-0.502724	0	0	-0.0194637
ppdA	-0.198006	-0.0337806	0	-0.0353642	0	0	-0.0464839	-0.0337806	0	0.863143	-0.264179	0.346656	0
rpsS	0.862713	0	0.748841	0	0	0	0	0	0	-0.282843	0	0	0.00598155
fecD	0	0.196646	0.040802	0.170393	0.101682	0.167055	0.15478	0.170393	0.862509	0.357658	-0.142716	0.471139	0.393253
phnH	0	0	0	0	0	-0.0596258	0	0	0	0.0083964	-0.586761	0.00584828	0.86243
yejM	-0.0642716	0.62301	0.856578	0.862379	0.456265	0.522286	0.363744	0.862379	0	0.482034	-0.967016	0.845978	0
purA	0	0.630711	0.636444	0.448124	0.86158	0.622146	0.568051	0.630711	0	0	-0.524545	0	0.142874
yafE	0	-0.116788	-0.0445858	-0.116788	-0.125566	0	-0.0699358	-0.116788	-0.136083	-0.349083	-0.696844	0.0585862	0.861395
ydjJ	0.0875033	0.10196	0.206116	0.169996	0.212304	0.272223	0.152135	0.168934	0.503887	0.860994	-0.428584	0.827648	-0.0607212
xerD	-0.24373	0	0	0	0	0	0	0	0.845204	0.353835	-0.126209	0	0.86041
uidB	-0.3195	0.0106881	0.106571	0.0106881	-0.0948794	0.860021	0	0.0106881	-0.287531	0.0193218	0.027469	-0.134973	0.808251
glpA	0.250804	0.252837	0.155226	0.10998	0.111283	0.0827583	0.0827583	0.10998	-0.247256	0.116577	-0.614318	-0.131078	0.859027
yieE	-0.203597	0	0	0.074814	-0.0427091	0	-0.00731009	0.00732562	0	0	-0.433	0.175054	0.858757
znuC	0	0	0	0.0114822	0	0	0	0	-0.595443	-0.0200395	0	0.156076	0.858736
ypdC	-0.262619	0.462635	0.211268	0.0849719	0.191373	0.0350772	0.245465	0.830272	-0.158458	-0.0338207	-0.0305777	0.0216656	0.858261
ycaO	-0.777194	0.858079	0.345846	0	0	0	0	0	-0.588859	0.84635	-1.93878	0	0
hinT	0.220655	0.380425	0.54339	0.16674	0	0.857345	0.300386	0.352005	0	0.294592	-0.289965	0.265279	0.169199
yfcM	0	0	0	0	0	0	0	0	0	0	0	0	0.85724
mdtH	0	0.210816	0.279904	0.74126	0.500084	0.381999	0.277979	0.224787	0	0.370761	-0.501888	0.857206	0.267563
rimK	-0.349727	0.0643992	0.162284	0.103072	0	0.143025	0.161514	0.369732	0	0	-0.680564	0.196146	0.856661
ynfB	0	0	0.0810337	0	0	0	0	0.0301263	0.608211	0	0	0.184076	0.856661
dadA	-0.854908	0.371159	0.238897	0.371159	0.299163	0.134447	0.449205	0.355534	-1.19312	0.856312	-0.251632	0.710973	0
yciW	-0.0617665	0.0198969	0	0.0198969	0.0768072	0.231132	0.0118116	0.0382264	-0.063078	0	-0.458924	-0.0893466	0.855257
fucU	0.0576336	0	-0.126764	-0.131732	-0.172231	0	-0.0515509	-0.131732	0	0	-0.0730507	-0.171316	0.855065
yqeA	0	-0.0836722	-0.181283	-0.0836722	-0.0758529	-0.00318694	-0.069227	0.180419	0.199229	0.855037	0.0251705	0	0.0177518
degQ	0.138437	0.854662	0	0	0	0.662319	0.141711	0	0.46026	0	0	0	0
hslR	0	0.191165	0.18742	0.191165	0.114307	0.183459	0.178211	0.194882	0	0.322895	0	0.111026	0.853856
ybl185	-0.0133571	0	0	0.249823	0.148693	0.0943053	0.0718943	0.0874062	0.0133965	0.134287	-1.15219	0	0.853397
yacL	0.853279	0.548029	0.697815	0.528943	0.0210575	0.784608	0.54067	0.510461	0.071468	0	-0.903452	0.235126	0.233848
nlpI	-0.256848	0.184134	0.0865233	0	0	0.752624	0.295819	0.85302	0	0.518025	-0.68205	0.453677	0.370582
mioC	-1.43903	0.141518	0.0889285	0.245059	0.0868453	0.147279	0.205956	0.168147	-0.787194	0.852974	-0.650087	0.363147	0.150487
ybl99	0.11062	0.0170149	0	0	0	0	0	0	0	0.392583	0	0.274843	0.852938
fic	0.852833	0.185634	0.220569	0.130569	0.127808	0.642264	0.012835	0.130569	0.791686	0.423007	0	0.461796	0
rpmC	0	0	0.850664	0	0.572767	0	0	0	-0.00579695	0	0	0.026997	0
yqcE	0.361804	-0.153573	-0.162396	-0.153573	0	-0.177885	-0.177885	-0.100138	0.805203	0.790898	-0.273303	0.850601	-0.0510885
trmI	0.0498927	0	0	0	0	0.195775	0	0	0	0.850584	0.132179	0.536976	0.686756
yeeF	-0.101867	0.516646	0.709276	0.516646	0.375092	0.489424	0.739424	0.516646	-0.893346	0.850445	-1.82495	0.382731	0.0151624
bioB	-0.409737	0.0812473	0.121297	0.0812473	0.336403	0.0741514	0	0.0812473	0.182619	0.850372	-0.39333	0	0.0899043
hyfF	-0.178212	0.490622	0.850217	0.423955	0.349068	0.530067	0.396734	0.423955	-0.246375	0.225087	-1.4587	0.0432882	0.29289
pncB	-0.807176	0.849763	0.752152	0.849763	0.708209	0.822542	0.822542	0.849763	-0.840793	-0.0843488	-2.2714	0.465848	0.465848
recT	0	0.429314	0.328394	0.429314	0.481679	0.524468	0.424352	0.429314	0.410504	0.849548	0	0.358386	0
betB	0.00473423	0.090094	-0.00751677	0.090094	0.218636	0.194953	0.0628726	0.090094	0.26291	0.849514	-1.05768	0	0.398919
rpsH	0	0.315807	0.531522	0.315807	0.297735	0.69211	0.290711	0.315807	-0.515726	0	0	0.84951	0
araA	0	0.645326	0.521449	0.645326	0.503772	0.514076	0.618105	0.645326	0.330681	0.849223	0	0.3495	0.261411
insJK	0	0	0.65563	0.0150088	0	0	0	0	0	0	0	0	0.848845
arsR	0.389192	-0.0379108	0.0101165	-0.176056	-0.123704	-0.0410359	-0.211446	-0.141049	0.672247	0	0	-0.0364433	0.848814
wzzE	-0.470161	0.175661	0.040506	0.84793	0.135903	0.307896	0.161665	0.173783	0.223476	0.378635	0	0.146953	0.0831606
argA	-0.0398459	0.0336573	0	0.0336573	0	0.0142382	0.0142382	0	-0.0249087	-0.0286518	0	-0.167997	0.847315
nuoH	0.122756	0	-0.311166	-0.28903	-0.196922	-0.316251	0	-0.28903	0.539729	0.846819	-0.256431	-0.0304754	0.274579
ybl214	0	0.846815	0.0666829	0	0	0.658084	0.158687	0.105938	0.186342	0.384979	-0.204503	0	0
yiaN	0.276926	-0.24391	-0.190524	-0.198455	-0.131602	0	-0.22013	-0.198455	0.796966	0.846272	0	0.110826	-0.0829489
elaA	-0.0671265	0	-0.0864432	0	0	0.226505	0	0	0	0	-0.100546	0	0.846212
ribB	0.659994	0.420416	0.0137581	0.316503	0.470594	0.845944	0.353765	0.3213	0.104585	0.20619	0.00820262	0	0
yghO	0.242183	-0.360659	-0.398843	-0.420277	-0.358741	-0.214136	-0.33888	-0.4716	0.102105	0.476526	-0.387315	0.0391427	0.845343
ldcC	0	0.458231	0.793846	0.289099	0.59234	0	0.289596	0.458231	0.672362	0	0.109785	0.243429	0.845181
cydA	-1.20267	0.742481	0.844871	0.742481	0.600927	0.71526	0.71526	0.742481	-0.596091	0.748457	-1.63952	0.558566	0.109539
chbB	-0.107426	0.392603	0.600848	0.465544	0.394806	0.84463	0.560372	0.465544	0	0.337038	0	0.458288	0.380826
yfdF	0.10505	0	0	0.0167529	0	0	0.0632963	0.0167529	0	-0.332642	-0.673512	0.235317	0.84434
ydcW	-0.542556	0.771807	0.781456	0.647807	0.616386	0.761531	0.730717	0.772324	0.411522	0	-0.360454	0.400221	0.843538
fimD	-0.395016	0.843203	0.745592	0.843203	0.701648	0.815981	0.815981	0.843203	0.422028	0	0	0.459288	0.321511
yidK	-0.124744	-0.302204	-0.305605	-0.295098	-0.356545	-0.325773	-0.228704	-0.301736	0.180333	0.843048	-0.791353	-0.0787949	-0.280187
ompL	0	-0.212947	-0.238555	-0.212947	-0.306619	0.0141885	-0.238272	-0.223621	0.264677	-0.621623	0	0	0.842822
uvrA	-1.53647	0.651025	0.553414	0.651025	0.842804	0.623803	0.623803	0.651025	-0.29791	0.0502462	-2.57764	0.600443	0.26711
yghE	-0.0688277	0	0	0	0	-0.000160249	0	-0.0147762	0.274308	0.842608	0	0	0.50188
fadB	-0.301668	0.266109	0.10552	0.266109	0.124555	0.238888	0.238888	0.266109	0.566759	0.842533	0.281042	0.369879	-0.117806
aec37	-1.07448	0.350439	0.252828	0.323065	0.545955	0.429797	0.318904	0.340266	-0.800236	0.257422	-0.959597	0.679132	0.842316
mlaB	0	0.551205	0.515121	0.452188	0.567843	0.841994	0.368361	0.330801	-0.163073	0.110267	0	0.281035	0
yjfN	0	0	0.0417214	0.069379	0	0	0	0.069379	0	0.84197	0	0.333298	0.134839
truC	-0.54854	0.286653	0.261938	0.520031	0.200131	0.271037	0.604292	0.841854	-0.0193127	0.625385	-0.510702	0	0.391989
yifB	0	-0.101858	-0.140805	-0.0325987	-0.147879	0.598031	-0.0236925	0.0446171	-0.358278	-0.267882	-0.488515	-0.258512	0.841183
secF	-0.639614	0.120186	0.349251	0.0970793	0	0.0929648	0.0929648	0.274032	-0.314528	-0.201379	-0.550025	-0.170244	0.839864
mraY	-0.0651954	0.666984	0.368241	0.233265	0.240652	0.135812	0.207862	0.235083	0.737312	0.839449	-0.737233	0.401232	0
creC	0.224679	-0.609718	-0.158289	-0.609718	-0.626272	-0.636939	-0.636939	-0.609718	0.075619	0.837306	-0.722924	-0.413151	-0.993633
yiaD	-0.00337841	0	0	0	0	0	0	0	0.158118	0.543412	0.836805	0	0.570389
wcaL	-0.506333	0.163025	0.111366	0.108043	0.201692	0.836681	0.179932	0.163025	-0.230361	0.603521	-0.978986	0.389572	-0.146225
fnr	-0.0966727	0.478027	0.45019	0.478027	0.318375	0.83668	0.127517	0.478027	-0.174102	0.207741	-1.17431	0.285035	0
rssA	0.243141	0.0666668	0	0.116222	0	0.104761	0.105861	0.0666668	0.325335	0	-0.539184	0.473576	0.836523
srlB	0	0.00896618	0.071799	0.00896618	0.214735	0.139324	0	0.00896618	0.434006	0.836134	-0.597136	0.587017	0
dinG	-1.55572	0.0555649	-0.0420459	0.0555649	-0.0859892	0	0.278343	0.0555649	-1.15113	-0.878547	-1.37688	0.836132	-0.32835
rplK	-0.071091	0.420792	0.488272	0.420792	0.213698	0.396955	0.396955	0.420792	-0.0445764	0.330423	-0.0169143	0.0999857	0.835863
valX	0.835567	-0.318409	0	-0.318409	-0.459963	-0.340919	-0.340919	-0.318409	0	0.644641	0	-0.674252	-0.259836
yoaG	0	0	0	0	0.174181	0.249471	0	0	0	-0.293585	0.835256	0	0
yigP	-0.0224973	0.368838	-0.00706599	0	0	0.0467704	0.0645405	0	0.184299	0	0	0	0.835211
pcnB	0.601063	0.0576914	-0.0399194	0.0576914	-0.0838628	0.0304699	0.0304699	0.0576914	-0.957616	-0.876421	0.652448	0.173776	0.83474
yeiG	-0.0245278	0.181613	0.0840023	0.181613	0.493883	0.447213	0.778576	0.181613	0.0166096	0.463773	-0.0489667	0.834679	0.383194
gadC	-0.542288	0.0877944	0.834629	0	-0.00400846	0	0.0697102	0.0877944	-0.519443	-0.275326	0.0761823	-0.121369	-0.246369
aroL	-0.675554	0.672716	0.592806	0.83456	0.573324	0.614346	0.644994	0.671931	0	0	-0.815741	0.417759	0.540862
ybl120	-0.270729	0.644172	0.46927	0.644172	0.577523	0.626844	0.626844	0.635422	-0.189972	0	-0.333263	0.207343	0.834029
mutM	-0.113181	0	0.126641	0	0.231152	0.000422479	0	0	0.534469	0.833489	-0.327934	0	0
ugpC	0.347766	0	-0.0430466	0	0	0	0	0	0.833237	0.21579	-0.272057	0.550477	0
nrdE	0.0460219	-0.0332172	0.317847	0	0	0	-0.0539258	0	-0.0531277	0.46224	0.449895	-0.243454	0.832428
ybl125	-0.0191049	0.0688845	0.298365	0.0688845	0.224278	0.0485045	0.0485045	0.0688845	0	0	-0.0196198	0	0.832147
csrD	-0.477907	0.0364348	0.298362	0.0362501	0.0750097	0	0.0102553	0.0362501	-1.10109	-0.1964	0	-0.11212	0.831606
nudB	-0.373587	-0.0368226	-0.0112232	-0.0368089	-0.219295	-0.082276	-0.0601019	-0.0368089	-0.101276	-0.414213	-0.0950964	-0.247996	0.830592
tehA	0	0	0	0	0.0698753	0.0638211	0	0	0	0.829918	-0.93872	0.139023	0
glnK	0.25888	0	0.2531	0	0	0.6218	0.154997	0.0650644	0	0.00032551	-0.24746	-0.108199	0.829511
yhfS_1	-0.293408	0	0	0	0	0.286585	0	0	0.0394762	0.829209	0	0.31562	0
degP	-0.176983	0.17084	0.163241	0.209095	0.314236	0.245517	0.24993	0.197374	-0.137343	-0.41498	-0.618488	0.0889404	0.828986
yeeL_2	0.132408	0.128335	0.225733	0.0980315	0.0641531	0.82872	0.277093	0.208055	0.171644	0.48701	-0.18961	0.257427	0.305833
rarD	-0.00473235	0	0	0	0	0.828464	0	0	-0.042082	0	-0.107118	0	0
zntA	0.57416	0.157233	0	0.00243798	0.0702646	0.218344	0.0854534	0.177641	0.510658	0.827925	-1.43982	0.041341	0.400632
yeaR_2	0	-0.398583	-0.382133	-0.398583	0	0	-0.417978	-0.398583	-0.0804417	-0.131009	0	0	0.827757
yceD	-1.14176	0.250846	0.246629	0.250846	0.319375	0.826983	0.220942	0.250846	-0.021309	0.302751	0	0.671831	0.0569798
yjhX	-0.106615	-0.314869	-0.243936	-0.0788952	-0.250643	-0.277968	-0.342091	-0.283619	0	0	0	-0.184379	0.826131
nikB	0.0484704	-0.55442	-0.106729	-0.55442	-0.517704	-0.574192	-0.564693	0.271687	-0.206344	-0.55297	-0.302039	-0.120972	0.826071
lptA	0.246254	0.825943	0.550301	0.649943	0.610355	0.624149	0.335791	0.663211	0	0	0.266632	0.678411	0
thiK	0.0546668	0	0	0.0344432	0.178055	0	0.0278895	0	0.825773	0.326204	-0.405667	0.282014	0.225061
arpA_1	0	0.203411	0.1058	0.203411	0.254844	0.176189	0.133317	0.203411	0	0	0	0	0.825254
otsA	-0.0256359	0.262026	0.417927	0	0.237872	0.251283	0.33155	0	0	-0.0763172	0.824259	0.193882	0.247189
cusS	-0.6445	-0.143037	-0.289563	-0.143239	-0.231706	-0.201155	-0.177287	-0.17018	0	-0.218078	0.00701775	-0.11869	0.82363
rutG	-0.166544	0.0221828	0	0.277208	0.112653	0.0640203	0.159122	0	0	0.823557	-0.355341	0.155669	0.27901
ompN	-0.956771	0.293286	0.48385	0.293286	0.439907	0.823272	0.266065	0.293286	0	-0.110278	0.0647106	0.197546	0.322946
metK	-0.264705	0.289398	0.75786	0.333071	0.283317	0.822978	0.341934	0.333071	0.365963	0	-0.589447	0	0.093115
[truncated: 2,741 more rows]

## Sheet: High_fitness 
	itnum	condition	gene_index	gene_name	score_cnnls
[truncated: 39 more rows]

[truncated: 1 more sheets: Fig 7B data]
