# Supplementary material for: High-throughput mapping of the phage resistance landscape in E. coli
Source: PLOS journal article supplement (doi:10.1371/journal.pbio.3000877), 2020-10-13
Supplement: S10 (10.1371/journal.pbio.3000877.s010) [file journal.pbio.3000877.s010]

## S2 Table

Summary of known and new high fitness score hits per phage per screen at any MOI.

| <b>E coli K-12 BW25113 RB-TnSeq screen: Total hits 354</b> |                     |           |
|------------------------------------------------------------|---------------------|-----------|
| Phages                                                     | Unique host factors | Known     |
| T2                                                         | 9                   | 1         |
| T3                                                         | 12                  | 4         |
| T4                                                         | 11                  | 4         |
| T5                                                         | 1                   | 1         |
| T6                                                         | 1                   | 1         |
| T7                                                         | 10                  | 10        |
| N4                                                         | 8                   | 3         |
| c1857 Lambda                                               | 16                  | 16        |
| P1                                                         | 11                  | 1         |
| P2                                                         | 15                  | not known |
| 186                                                        | 21                  | 13        |
| CEV1                                                       | 13                  | not known |
| CEV2                                                       | 1                   | 1         |
| LZ4                                                        | 7                   | not known |
|                                                            |                     |           |
| <b>E coli K-12 MG1655 CRISPRi screen: Total hits 542</b>   |                     |           |
| Phages                                                     | Unique host factors | Known     |
| T2                                                         | 4                   | 1         |
| T3                                                         | 139                 | 2         |
| T4                                                         | 24                  | 2         |
| T5                                                         | 9                   | 1         |
| T6                                                         | 7                   | 1         |
| T7                                                         | ND                  | --        |
| N4                                                         | 46                  | 2         |
| c1857 Lambda                                               | 15                  | 8         |
| P1                                                         | ND                  | --        |
| P2                                                         | ND                  | --        |
| 186                                                        | 26                  | 11        |
| CEV1                                                       | 40                  | not known |

|      |    |           |
|------|----|-----------|
| CEV2 | 17 | 1         |
| LZ4  | 7  | not known |

### **E coli K-12 BW25113 Dub-seq screen: Total hits 233**

| Phages       | Unique host factors | Known     |
|--------------|---------------------|-----------|
| T2           | 7                   | not known |
| T3           | 8                   | not known |
| T4           | 6                   | not known |
| T5           | 4                   | not known |
| T6           | 4                   | not known |
| T7           | 5                   | 1         |
| N4           | 20                  | 1         |
| c1857 Lambda | 21                  | not known |
| P1           | 3                   | --        |
| P2           | ND                  | --        |
| 186          | 21                  | not known |
| CEV1         | 12                  | not known |
| CEV2         | 3                   | not known |
| LZ4          | 12                  | not known |

### **E coli BL21 RB-TnSeq screen: Total hits 115**

| Phages       | Unique host factors | Known     |
|--------------|---------------------|-----------|
| T2           | 5                   | 1         |
| T3           | 5                   | 2         |
| T4           | 3                   | 3         |
| T5           | 1                   | 1         |
| T6           | 1                   | 1         |
| T7           | 5                   | 2         |
| N4           | NA                  | --        |
| c1857 Lambda | 18                  | --        |
| P1           | 2                   | --        |
| P2           | ND                  | --        |
| 186          | NA                  | --        |
| CEV1         | 9                   | not known |

|                                                  |                     |           |
|--------------------------------------------------|---------------------|-----------|
| CEV2                                             | 1                   | not known |
| LZ4                                              | 2                   | not known |
|                                                  |                     |           |
| <b>E coli BL21 Dub-seq screen: Total hits 39</b> |                     |           |
| Phages                                           | Unique host factors | Known     |
| T2                                               | 2                   | not known |
| T3                                               | ND                  | not known |
| T4                                               | 1                   | not known |
| T5                                               | 2                   | not known |
| T6                                               | 2                   | not known |
| T7                                               | 2                   | not known |
| N4                                               | NA                  | not known |
| c1857 Lambda                                     | 27                  | not known |
| P1                                               | 3                   | not known |
| P2                                               | 1                   | not known |
| 186                                              | NA                  | not known |
| CEV1                                             | 2                   | not known |
| CEV2                                             | 3                   | not known |
| LZ4                                              | 1                   | not known |
