# Supplementary material for: High-throughput mapping of the phage resistance landscape in E. coli
Source: PLoS Biol. 2020 Oct 13;18(10):e3000877. doi: 10.1371/journal.pbio.3000877 (PMC7553319; doi:10.1371/journal.pbio.3000877)
Supplement: S10 Table — (XLSX) [file pbio.3000877.s018.xlsx]

## Sheet: Primers_Supp Table 10
Primers	Sequence (5'-3')	Usage
Keio_dmsA 11-32 FWD 1	agtaccagaagttctgcgtccg	To verify respective gene deletion in the Keio strains
Keio_dmsA 1772-1793 REV 1	accgttatcttcctgccagtcg	To verify respective gene deletion in the Keio strains
keio_dsrB 94-115 FWD 1	gacctcacgttttgcggtatcg	To verify respective gene deletion in the Keio strains
keio_dsrB 1841-1862 REV 1	atgttgcgaatgtggatggcag	To verify respective gene deletion in the Keio strains
Keio_galU 338-359 FWD 1	atgtcggctggtggtactatcg	To verify respective gene deletion in the Keio strains
Keio_galU 2105-2126 REV 1	aaagctaaacgtgctcagcgtc	To verify respective gene deletion in the Keio strains
keio_ghrA 287-308 FWD 1	gctggaacgggcgctaatttag	To verify respective gene deletion in the Keio strains
keio_ghrA 2067-2088 REV 1	caggatccctaccccatcaacc	To verify respective gene deletion in the Keio strains
keio_gmhA 215-236 FWD 1	tcatagcacctgcccgtacttc	To verify respective gene deletion in the Keio strains
keio_gmhA 1729-1750 REV 1	cattattcggcctacggttcgc	To verify respective gene deletion in the Keio strains
keio_ompF 143-164 FWD 1	agcactttcacggtagcgaaac	To verify respective gene deletion in the Keio strains
keio_ompF 1885-1906 REV 1	ccgaggttaattttgccgggac	To verify respective gene deletion in the Keio strains
Keio_yeaJ 82-103 FWD 1	cccctaaatttcccctccccag	To verify respective gene deletion in the Keio strains
Keio_yeaJ 1663-1684 REV 1	ccgcttcacatttacctaccgc	To verify respective gene deletion in the Keio strains
keio_yedY 85-106 FWD 1	ttcttccctgagatccccgttg	To verify respective gene deletion in the Keio strains
keio_yedY 1838-1859 REV 1	ggcgagtgcgtatcaataacgg	To verify respective gene deletion in the Keio strains
Keio_ygaH 75-96 FWD 1	caaggttatcccgccgttgaag	To verify respective gene deletion in the Keio strains
Keio_ygaH 1865-1886 REV 1	acgtctcgttaatcccctgagc	To verify respective gene deletion in the Keio strains
Keio_yphD 294-315 FWD 1	taccgtattgtccgtgagctgg	To verify respective gene deletion in the Keio strains
Keio_yphD 2163-2184 REV 1	aaatgtgatacaccagcacgcg	To verify respective gene deletion in the Keio strains
pCA24N_F	cgaggccctttcgtcttcac	To verify gene sequences cloned in pCA24N plasmid
pCA24N_R	cgaggcagatcgtcagtcag	To verify gene sequences cloned in pCA24N plasmid
fadL_F	atagaaacatacttgcaacattccagc	To verify phage P1 mediated kanamycin marker transduction to disrupt respective genes into BL21 strain
fadL_R	tgtggataccgcttattgatttgaaag	To verify phage P1 mediated kanamycin marker transduction to disrupt respective genes into BL21 strain
oBA579_yrfF_A_Kan_Disrupt_F	TGAGCACCATTGTGATTTTTTTAGCTGCTTTGCTGGCCTGCTCACTACTTctgatccttcaactcagcaaaagttcgatttattc	For creating igaA mutant A via recombineering
oBA580_yrfF_A_Kan_Disrupt_R	TCCGCGAAGGCGTTGGTCCAGGGCAGCTGACGCCGTCTGGATCGCACTTTgagtcccgtcaagtcagcgtaatgc	For creating igaA mutant A via recombineering
oBA583_yrfF_B_KanR_disrupt_F	CAGGTATTACAGGTGCCTGGCCCAACGGGAGCCAGCGCGGCACCGATCTCctgatccttcaactcagcaaaagttcgatttattc	For creating igaA mutant B via recombineering
oBA584_yrfF_B_KanR_disrupt_R	GGATCGTCGGTAGAGATGCCGTAACGCGTGATAGCGTGTGTCAGCATCATgagtcccgtcaagtcagcgtaatgc	For creating igaA mutant B via recombineering
oBA585_yrfF_D_KanR_Disrupt_F	TGATTCATACCGATTCGCTGCCGCTGGTTATTTCACTCAACGGTCATACGctgatccttcaactcagcaaaagttcgatttattc	For creating igaA mutant D via recombineering
oBA586_yrfF_D_KanR_Disrupt_R	GACGCCTGCGTTGACGGAACAGGTTGCAAGGCATAGCTGCGAGTTTCCTGgagtcccgtcaagtcagcgtaatgc	For creating igaA mutant D via recombineering
oBA575_yrfF_check_F	CAGAATCATGTATTGTGTCCGGTGCGAC	PCR of igaA disruption with kan marker oligo
oBA581_Kan_Nterm_R	TGGAATTTAATCGCGGCCTGGAGC	PCR of igaA disruption with kan marker oligo
oBA582_Kan_Cterm_F	GGTGAGTTTTCTCCTTCATTACAGAAACGGC	PCR of igaA disruption with kan marker oligo
oBA576_yrfF_2/3_R	ATGGTCTGCGCGCCTTTCATCC	PCR of igaA disruption with kan marker oligo
oBA577_KanR_5_seq_R -	aagacgtttcccgttgaatatggctcat	For sanger sequence confirmation of igaA mutants
oBA578_KanR_Cterm_seq_F -	gcagtttcatttgatgctcgatgagtttttctaa	For sanger sequence confirmation of igaA mutants
new gene names	yrfF (igaA) pdeN(rtn); gmr (pdeR); yjcC (pdeC); dosP (pdeO); pdeL (yahA); pdeB (ylaB); pdeI (yliE); dgcJ (yeaJ); yhbJ(rapZ)
