# Supplementary material for: High-throughput mapping of the phage resistance landscape in E. coli
Source: PLoS Biol. 2020 Oct 13;18(10):e3000877. doi: 10.1371/journal.pbio.3000877 (PMC7553319; doi:10.1371/journal.pbio.3000877)
Supplement: S11 Table — (XLSX) [file pbio.3000877.s019.xlsx]

## Sheet: Plasmids_Supp Table 11
Plasmids	Design	Antibiotic	Source	ref
pCA24N-yedY	ASKA plasmid library	Chloramphenicol	Lab stock	PMID: 16769691
pCA24N-deaD	ASKA plasmid library	Chloramphenicol	Lab stock	PMID: 16769691
pCA24N-yahA	ASKA plasmid library	Chloramphenicol	Lab stock	PMID: 16769691
pCA24N-dgcJ	ASKA plasmid library	Chloramphenicol	Lab stock	PMID: 16769691
pCA24N-pdeI	ASKA plasmid library	Chloramphenicol	Lab stock	PMID: 16769691
pCA24N-ylaB/pdeB	ASKA plasmid library	Chloramphenicol	Lab stock	PMID: 16769691
pCA24N- gmhA	ASKA plasmid library	Chloramphenicol	Lab stock	PMID: 16769691
pCA24N-ompF	ASKA plasmid library	Chloramphenicol	Lab stock	PMID: 16769691
pCA24N-dsrB	ASKA plasmid library	Chloramphenicol	Lab stock	PMID: 16769691
pCA24N-rtn	ASKA plasmid library	Chloramphenicol	Lab stock	PMID: 16769691
pCA24N-dosP	ASKA plasmid library	Chloramphenicol	Lab stock	PMID: 16769691
pCA24N-gmr	ASKA plasmid library	Chloramphenicol	Lab stock	PMID: 16769691
pCA24N-ygaH	ASKA plasmid library	Chloramphenicol	Lab stock	PMID: 16769691
pCA24N-dmsA	ASKA plasmid library	Chloramphenicol	Lab stock	PMID: 16769691
pCA24N-ygbE	ASKA plasmid library	Chloramphenicol	Lab stock	PMID: 16769691
pCA24N-igaA	ASKA plasmid library	Chloramphenicol	Lab stock	PMID: 16769691
pCA24N-yedJ	ASKA plasmid library	Chloramphenicol	Lab stock	PMID: 16769691
pCA24N-rcsA	ASKA plasmid library	Chloramphenicol	Lab stock	PMID: 16769691
pCA24N-surA	ASKA plasmid library	Chloramphenicol	Lab stock	PMID: 16769691
pCA24N-yhbj	ASKA plasmid library	Chloramphenicol	Lab stock	PMID: 16769691
pCA24N-pdeC	ASKA plasmid library	Chloramphenicol	Lab stock	PMID: 16769691
pCA24N-yjcF	ASKA plasmid library	Chloramphenicol	Lab stock	PMID: 16769691
pCA24N-flhD	ASKA plasmid library	Chloramphenicol	Lab stock	PMID: 16769691
pCA24N-ghrA	ASKA plasmid library	Chloramphenicol	Lab stock	PMID: 16769691
pCA24N-ydjF	ASKA plasmid library	Chloramphenicol	Lab stock	PMID: 16769691
pCA24N-lrhA	ASKA plasmid library	Chloramphenicol	Lab stock	PMID: 16769691
pCA24N-yphD	ASKA plasmid library	Chloramphenicol	Lab stock	PMID: 16769691
pCA24N-mtlA	ASKA plasmid library	Chloramphenicol	Lab stock	PMID: 16769691
Dub-seq K-12	Dub-seq library	Chloramphenicol	Lab stock	PMID: 30659179
Dub-seq BL21	Dub-seq library	Chloramphenicol	This work	This work
pFAB5526 library	Dub-seq backbone vector	Kanamycin	This work	This work
CRISPRi library	sgRNA library, pT154	carbenicillin	Lab stock	Rishi et al (submitted)
pCA24N	empty vector	Chloramphenicol	Gill Lab, Texas A&M University
pSIM5	Lab stock		Lab stock
new gene names	yrfF (igaA) pdeN(rtn); gmr (pdeR); yjcC (pdeC); dosP (pdeO); pdeL (yahA); pdeB (ylaB); pdeI (yliE); dgcJ (yeaJ); yhbJ(rapZ)
