# Supplementary material for: High-throughput mapping of the phage resistance landscape in E. coli
Source: PLoS Biol. 2020 Oct 13;18(10):e3000877. doi: 10.1371/journal.pbio.3000877 (PMC7553319; doi:10.1371/journal.pbio.3000877)
Supplement: S12 Table — (XLSX) [file pbio.3000877.s020.xlsx]

## Sheet: Strains_Supp Table 12
	Strains	plasmids	Source	Source/reference
	E. coli K-12 BW25113		Lab stock
	E. coli BL21		Lab stock	Studier
	E. coli BL21 DE3 C43		Lucigen	Lucigen
	E. coli MG1655		Lab stock
	DH10B cells		NEB	NEB
	E coli C		Calendar lab stock	Rich Calendar
	E coli W3350		Lucia B. Rothman-Denes	Lucia B. Rothman-Denes
	BW25113 ΔompF		Lab stock	PMID 16738554
	BW25113 ΔygaH		Lab stock	PMID 16738554
	BW25113 ΔdsrB		Lab stock	PMID 16738554
	BW25113 ΔgalU		Lab stock	PMID 16738554
	BW25113 ΔyphD		Lab stock	PMID 16738554
	BW25113 ΔdmsA		Lab stock	PMID 16738554
	BW25113 ΔdgcJ		Lab stock	PMID 16738554
	BW25113 ΔghrA		Lab stock	PMID 16738554
	BW25113 ΔgmhA		Lab stock	PMID 16738554
	BW25113 igaA mutantA			This work
	BW25113 igaA mutantB			This work
	BW25113 igaA mutantC			This work
	BL21 ΔfadL		This work	This work
	BW25113	pCA24N-deaD	This work	This work
	BW25113	pCA24N-yahA	This work	This work
	BW25113	pCA24N-pdeI	This work	This work
	BW25113	pCA24N-ylaB/pdeB	This work	This work
	BW25113	pCA24N-rtn	This work	This work
	BW25113	pCA24N-dosP	This work	This work
	BW25113	pCA24N-gmr	This work	This work
	BW25113	pCA24N-ygaH	This work	This work
	BW25113	pCA24N-dmsA	This work	This work
	BW25113	pCA24N-ygbE	This work	This work
	BW25113 igaA mutantA	pCA24N-igaA-	This work	This work
	BW25113	pCA24N-yedJ	This work	This work
	BW25113	pCA24N-rcsA	This work	This work
	BW25113	pCA24N-yhbj	This work	This work
	BW25113	pCA24N-pdeC	This work	This work
	BW25113	pCA24N-flhD	This work	This work
	BW25113	pCA24N-lrhA	This work	This work
	BW25113	pCA24N-yphD	This work	This work
	BW25113	pCA24N-mtlA	This work	This work
	BW25113	pCA24N-ygaH	This work	This work
	BW25113	pCA24N-dsrB	This work	This work
	BW25113	pCA24N-dgcJ	This work	This work
	BW25113	pCA24N-ghrA	This work	This work
	BW25113	pCA24N- gmhA	This work	This work
	BW25113	Dub-seq K-12 BW25113	Lab stock	PMID: 30659179
	BL21	Dub-seq BL21	This work	This work
	BW25113	pFAB5526 library	This work	This work
	MG1655 with dCas9		Lab stock	Rishi et al.
	MG1655 FRT-kanR-FRT tetR-pTet-dCas9	sgRNA library, pT154, Carbenicillin	Lab stock	Rishi et al.
	E coli WM3064	pKMW3 mariner transposon vector	Lab stock	PMID 25968644
new gene names	yrfF (igaA) pdeN(rtn); gmr (pdeR); yjcC (pdeC); dosP (pdeO); pdeL (yahA); pdeB (ylaB); pdeI (yliE); dgcJ (yeaJ); yhbJ(rapZ)
ET163	Phages			Phage genome accession #
APA752
	T2		Calendar Lab stock, UC Berkeley	MH751506.1
	T3		Arkin Lab stock, UC Berkeley	NC_003298.1
	T4		Elizabeth Kutter Lab, The evergreen state College, Olympia	AF158101.6
	T5		E coli Genetic Stock center, CGSC#: 12144	NC_005859.1
	T6		ATCC 11303-B6	MH550421.1
	T7		E coli Genetic Stock center, CGSC#: 12146	NC_001604.1
	N4		Lucia B. Rothman-Denes, Univ Chicago	EF056009.1
	CEV1		Elizabeth Kutter Lab, The evergreen state College, Olympia	Not determined
	CEV2		Elizabeth Kutter Lab, The evergreen state College, Olympia	Not determined
	LZ4		Elizabeth Kutter Lab, The evergreen state College, Olympia	Not determined
	P1vir		Jason Gill Lab Texas A&M University	NC_005856.1
	P2		Calendar Lab stock, UC Berkeley	AF063097.1
	186		Calendar Lab stock, UC Berkeley	NC_001317.1
	lambda c1857		Calendar Lab stock, UC Berkeley	NC_001416.1
