# Supplementary material for: High-throughput mapping of the phage resistance landscape in E. coli
Source: PLoS Biol. 2020 Oct 13;18(10):e3000877. doi: 10.1371/journal.pbio.3000877 (PMC7553319; doi:10.1371/journal.pbio.3000877)
Supplement: S13 Table — MOI, multiplicity of infection. (XLSX) [file pbio.3000877.s021.xlsx]

## Sheet: MOI_used_runs
Library/assay	expName	Phage	expDescription	Batch	pfu/ml	phage count for 350 ul	1 OD cfu/ml	Cell count at od 0.04, for 350 ul	phage dilution	MOI
RBTnSeq-BW25113	set16IT008	T2	LB_plus_SM_buffer with T2_phage 187.5 MOI	1	60000000000	21000000000	800000000	1.12e+07	0.1	187.5
RBTnSeq-BW25113	set16IT009	T2	LB_plus_SM_buffer with T2_phage 18.75 MOI	1	60000000000	21000000000	800000000	1.12e+07	0.01	18.75
RBTnSeq-BW25113	set16IT010	T2	LB_plus_SM_buffer with T2_phage 1.875 MOI	1	60000000000	21000000000	800000000	1.12e+07	0.001	1.875
RBTnSeq-BW25113	set16IT011	T2	LB_plus_SM_buffer with T2_phage 0.1875 MOI	1	60000000000	21000000000	800000000	1.12e+07	0.0001	0.1875
RBTnSeq-BW25113	set16IT012	T2	LB_plus_SM_buffer with T2_phage 0.01875 MOI	1	60000000000	21000000000	800000000	1.12e+07	1e-05	0.01875
RBTnSeq-BW25113	set16IT013	T2	LB_plus_SM_buffer with T2_phage 0.001875 MOI	1	60000000000	21000000000	800000000	1.12e+07	1e-06	0.001875
RBTnSeq-BW25113	set16IT021	T3	LB_plus_SM_buffer with T3_phage 234.375 MOI	1	75000000000	26250000000	800000000	1.12e+07	0.1	234.375
RBTnSeq-BW25113	set16IT022	T3	LB_plus_SM_buffer with T3_phage 23.4375 MOI	1	75000000000	26250000000	800000000	1.12e+07	0.01	23.4375
RBTnSeq-BW25113	set16IT023	T3	LB_plus_SM_buffer with T3_phage 2.34375 MOI	1	75000000000	26250000000	800000000	1.12e+07	0.001	2.34375
RBTnSeq-BW25113	set16IT024	T3	LB_plus_SM_buffer with T3_phage 0.234375 MOI	1	75000000000	26250000000	800000000	1.12e+07	0.0001	0.234375
RBTnSeq-BW25113	set16IT025	T3	LB_plus_SM_buffer with T3_phage 0.00234375 MOI	1	75000000000	26250000000	800000000	1.12e+07	1e-06	0.00234375
RBTnSeq-BW25113	set16IT026	T3	LB_plus_SM_buffer with T3_phage 0.000234375 MOI	1	75000000000	26250000000	800000000	1.12e+07	1e-07	0.000234375
RBTnSeq-BW25113	set16IT027	T4	LB_plus_SM_buffer with T4_phage 54.6875 MOI	1	175000000000	6.125e+10	800000000	1.12e+07	0.01	54.6875
RBTnSeq-BW25113	set16IT028	T4	LB_plus_SM_buffer with T4_phage 5.46875 MOI	1	175000000000	6.125e+10	800000000	1.12e+07	0.001	5.46875
RBTnSeq-BW25113	set16IT029	T4	LB_plus_SM_buffer with T4_phage 0.546875 MOI	1	175000000000	6.125e+10	800000000	1.12e+07	0.0001	0.546875
RBTnSeq-BW25113	set16IT030	T4	LB_plus_SM_buffer with T4_phage 0.0546875 MOI	1	175000000000	6.125e+10	800000000	1.12e+07	1e-05	0.0546875
RBTnSeq-BW25113	set16IT031	T4	LB_plus_SM_buffer with T4_phage 0.00546875 MOI	1	175000000000	6.125e+10	800000000	1.12e+07	1e-06	0.00546875
RBTnSeq-BW25113	set16IT032	T4	LB_plus_SM_buffer with T4_phage 0.000546875 MOI	1	175000000000	6.125e+10	800000000	1.12e+07	1e-07	0.000546875
RBTnSeq-BW25113	set16IT034	T5	LB_plus_SM_buffer with T5_phage 359.375 MOI	1	115000000000	40250000000	800000000	1.12e+07	0.1	359.375
RBTnSeq-BW25113	set16IT035	T5	LB_plus_SM_buffer with T5_phage 35.9375 MOI	1	115000000000	40250000000	800000000	1.12e+07	0.01	35.9375
RBTnSeq-BW25113	set16IT036	T5	LB_plus_SM_buffer with T5_phage 3.59375 MOI	1	115000000000	40250000000	800000000	1.12e+07	0.001	3.59375
RBTnSeq-BW25113	set16IT037	T5	LB_plus_SM_buffer with T5_phage 0.359375 MOI	1	115000000000	40250000000	800000000	1.12e+07	0.0001	0.359375
RBTnSeq-BW25113	set16IT038	T6	LB_plus_SM_buffer with T6_phage 2343.75 MOI	1	750000000000	2.625e+11	800000000	1.12e+07	0.1	2343.75
RBTnSeq-BW25113	set16IT039	T6	LB_plus_SM_buffer with T6_phage 234.375 MOI	1	750000000000	2.625e+11	800000000	1.12e+07	0.01	234.375
RBTnSeq-BW25113	set16IT040	T6	LB_plus_SM_buffer with T6_phage 23.4375 MOI	1	750000000000	2.625e+11	800000000	1.12e+07	0.001	23.4375
RBTnSeq-BW25113	set16IT041	T6	LB_plus_SM_buffer with T6_phage 2.34375 MOI	1	750000000000	2.625e+11	800000000	1.12e+07	0.0001	2.34375
RBTnSeq-BW25113	set16IT042	T6	LB_plus_SM_buffer with T6_phage 0.234375 MOI	1	750000000000	2.625e+11	800000000	1.12e+07	1e-05	0.234375
RBTnSeq-BW25113	set16IT043	T6	LB_plus_SM_buffer with T6_phage 0.0234375 MOI	1	750000000000	2.625e+11	800000000	1.12e+07	1e-06	0.0234375
RBTnSeq-BW25113	set16IT045	LZ4	LB_plus_SM_buffer with LZ4_phage 4.375 MOI	1	14000000000	4900000000	800000000	1.12e+07	0.01	4.375
RBTnSeq-BW25113	set16IT046	LZ4	LB_plus_SM_buffer with LZ4_phage 0.4375 MOI	1	14000000000	4900000000	800000000	1.12e+07	0.001	0.4375
RBTnSeq-BW25113	set16IT047	LZ4	LB_plus_SM_buffer with LZ4_phage 0.04375 MOI	1	14000000000	4900000000	800000000	1.12e+07	0.0001	0.04375
RBTnSeq-BW25113	set16IT048	LZ4	LB_plus_SM_buffer with LZ4_phage 0.004375 MOI	1	14000000000	4900000000	800000000	1.12e+07	1e-05	0.004375
RBTnSeq-BW25113	set16IT049	CEV1	LB_plus_SM_buffer with CEV1_phage 0.0171875 MOI	1	55000000	19250000	800000000	1.12e+07	0.01	0.0171875
RBTnSeq-BW25113	set16IT050	CEV1	LB_plus_SM_buffer with CEV1_phage 0.000171875 MOI	1	55000000	19250000	800000000	1.12e+07	0.0001	0.000171875
RBTnSeq-BW25113	set16IT051	CEV1	LB_plus_SM_buffer with CEV1_phage 0.00000171875 MOI	1	55000000	19250000	800000000	1.12e+07	1e-05	1.71875e-05
RBTnSeq-BW25113	set16IT053	CEV2	LB_plus_SM_buffer with CEV2_phage 6.40625 MOI	1	20500000000	7175000000	800000000	1.12e+07	0.01	6.40625
RBTnSeq-BW25113	set16IT054	CEV2	LB_plus_SM_buffer with CEV2_phage 0.0640625 MOI	1	20500000000	7175000000	800000000	1.12e+07	0.0001	0.0640625
RBTnSeq-BW25113	set16IT055	CEV2	LB_plus_SM_buffer with CEV2_phage 0.000640625 MOI	1	20500000000	7175000000	800000000	1.12e+07	1e-06	0.000640625
RBTnSeq-BW25113	set16IT073	lambda cI857	LB_plus_SM_buffer withcII857_phage 484.375 MOI	1	155000000000	54250000000	800000000	1.12e+07	0.1	484.375
RBTnSeq-BW25113	set16IT078	186	LB_plus_SM_buffer with I86_phage 1437.5 MOI	1	460000000000	161000000000	800000000	1.12e+07	0.1	1437.5
RBTnSeq-BW25113	set16IT079	186	LB_plus_SM_buffer with I86_phage 143.75 MOI	1	460000000000	161000000000	800000000	1.12e+07	0.01	143.75
RBTnSeq-BW25113	set16IT080	186	LB_plus_SM_buffer with I86_phage 14.375 MOI	1	460000000000	161000000000	800000000	1.12e+07	0.001	14.375
RBTnSeq-BW25113	set16IT081	186	LB_plus_SM_buffer with I86_phage 1.4375 MOI	1	460000000000	161000000000	800000000	1.12e+07	0.0001	1.4375
RBTnSeq-BW25113	set16IT082	N4	LB_plus_SM_buffer with N4_phage 234.375 MOI	1	75000000000	26250000000	800000000	1.12e+07	0.1	234.375
RBTnSeq-BW25113	set16IT083	N4	LB_plus_SM_buffer with N4_phage 23.4375 MOI	1	75000000000	26250000000	800000000	1.12e+07	0.01	23.4375
RBTnSeq-BW25113	set16IT084	N4	LB_plus_SM_buffer with N4_phage 2.34375 MOI	1	75000000000	26250000000	800000000	1.12e+07	0.001	2.34375
RBTnSeq-BW25113	set16IT085	N4	LB_plus_SM_buffer with N4_phage 0.234375 MOI	1	75000000000	26250000000	800000000	1.12e+07	0.0001	0.234375
RBTnSeq-BW25113	set16IT086	N4	LB_plus_SM_buffer with N4_phage 0.0234375 MOI	1	75000000000	26250000000	800000000	1.12e+07	1e-05	0.0234375
RBTnSeq-BW25113	set19IT073	P2	P2 dilution 10-1	1	180000000	6.3e+07	800000000	1.12e+07	0.1	0.5625
RBTnSeq-BW25113	set19IT074	P2	P2 dilution 10-2	1	180000000	6.3e+07	800000000	1.12e+07	0.01	0.05625
RBTnSeq-BW25113	set28IT005	T7	LB_plus_SM_buffer with T7_phage 6.25 MOI	1	2000000000	700000000	800000000	1.12e+07	0.1	6.25
RBTnSeq-BW25113	set28IT006	T7	LB_plus_SM_buffer with T7_phage 0.625 MOI	1	2000000000	700000000	800000000	1.12e+07	0.01	0.625
RBTnSeq-BW25113	set28IT008	P1	LB_plus_SM_buffer with P1_phage 218.75 MOI	1	70000000000	24500000000	800000000	1.12e+07	0.1	218.75
RBTnSeq-BW25113	set28IT009	P1	LB_plus_SM_buffer with P1_phage 21.875 MOI	1	70000000000	24500000000	800000000	1.12e+07	0.01	21.875
RBTnSeq-BW25113	set28IT010	P1	LB_plus_SM_buffer with P1_phage 2.1875 MOI	1	70000000000	24500000000	800000000	1.12e+07	0.001	2.1875
RBTnSeq-BW25113	set28IT011	P1	LB_plus_SM_buffer with P1_phage 0.21875 MOI	1	70000000000	24500000000	800000000	1.12e+07	0.0001	0.21875
RBTnSeq-BW25113	set28IT012	P1	LB_plus_SM_buffer with P1_phage 0.021875 MOI	1	70000000000	24500000000	800000000	1.12e+07	1e-05	0.021875
RBTnSeq-BW25113	set30IT054	T4	T4_phage_221.875_MOI	2	71000000000	24850000000	800000000	1.12e+07	0.1	221.875
RBTnSeq-BW25113	set30IT055	T5	T5_phage_625_MOI	2	200000000000	70000000000	800000000	1.12e+07	0.1	625
RBTnSeq-BW25113	set30IT056	T6	T6_phage_62.5_MOI	2	20000000000	7000000000	800000000	1.12e+07	0.1	62.5
RBTnSeq-BW25113	set30IT057	T7	T7_phage_31.25_MOI	2	10000000000	3500000000	800000000	1.12e+07	0.1	31.25
RBTnSeq-BW25113	set30IT058	P1	P1_phage_9.375_MOI	2	3000000000	1.05e+09	800000000	1.12e+07	0.1	9.375
RBTnSeq-BW25113	set30IT060	lambda cI857	lambda1857_phage_12.5_MOI	2	4000000000	1400000000	800000000	1.12e+07	0.1	12.5
RBTnSeq-BW25113	set30IT062	CEV2	CEV2_phage_84.375_MOI	2	27000000000	9450000000	800000000	1.12e+07	0.1	84.375
RBTnSeq-BW25113	set30IT063	LZ4	LZ4_phage_4.6875_MOI	2	1500000000	5.25e+08	800000000	1.12e+07	0.1	4.6875
RBTnSeq-BW25113	set30IT064	N4	N4_phage_1937.5_MOI	2	620000000000	217000000000	800000000	1.12e+07	0.1	1937.5
RBTnSeq-BW25113	set30IT065	186	186_phage_125_MOI	2	40000000000	14000000000	800000000	1.12e+07	0.1	125
RBTnSeq BL21	set1IT006	T4	T4_phage 0.28125 MOI	1	90000000	3.15e+07	800000000	1.12e+07	0.1	0.28125
RBTnSeq BL21	set1IT007	T4	T4_phage 0.028125 MOI	1	90000000	3.15e+07	800000000	1.12e+07	0.01	0.028125
RBTnSeq BL21	set1IT008	T4	T4_phage 0.0028125 MOI	1	90000000	3.15e+07	800000000	1.12e+07	0.001	0.0028125
RBTnSeq BL21	set1IT009	T4	T4_phage 0.00028125 MOI	1	90000000	3.15e+07	800000000	1.12e+07	0.0001	0.00028125
RBTnSeq BL21	set1IT010	T7	T7_phage 0.0469 MOI	1	15000000	5250000	800000000	1.12e+07	0.1	0.046875
RBTnSeq BL21	set1IT011	T7	T7_phage 0.000469 MOI	1	15000000	5250000	800000000	1.12e+07	0.01	0.0046875
RBTnSeq BL21	set1IT012	T7	T7_phage 0.0000469 MOI	1	15000000	5250000	800000000	1.12e+07	0.001	0.00046875
RBTnSeq BL21	set1IT013	T7	T7_phage 0.00000469 MOI	1	15000000	5250000	800000000	1.12e+07	0.0001	4.6875e-05
RBTnSeq BL21	set1IT031	T5	T5_phage 46.88 MOI	1	15000000000	5250000000	800000000	1.12e+07	0.1	46.875
RBTnSeq BL21	set1IT032	T5	T5_phage 4.688 MOI	1	15000000000	5250000000	800000000	1.12e+07	0.01	4.6875
RBTnSeq BL21	set1IT033	T5	T5_phage 0.4688 MOI	1	15000000000	5250000000	800000000	1.12e+07	0.001	0.46875
RBTnSeq BL21	set1IT034	T5	T5_phage 0.04688 MOI	1	15000000000	5250000000	800000000	1.12e+07	0.0001	0.046875
RBTnSeq BL21	set1IT035	T5	T5_phage 0.004688 MOI	1	15000000000	5250000000	800000000	1.12e+07	1e-05	0.0046875
RBTnSeq BL21	set1IT036	T6	T6_phage 46.88 MOI	1	15000000000	5250000000	800000000	1.12e+07	0.1	46.875
RBTnSeq BL21	set1IT037	T6	T6_phage 4.688 MOI	1	15000000000	5250000000	800000000	1.12e+07	0.01	4.6875
RBTnSeq BL21	set1IT038	T6	T6_phage 0.4688 MOI	1	15000000000	5250000000	800000000	1.12e+07	0.001	0.46875
RBTnSeq BL21	set1IT039	T6	T6_phage 0.04688 MOI	1	15000000000	5250000000	800000000	1.12e+07	0.0001	0.046875
RBTnSeq BL21	set1IT040	T6	T6_phage 0.004688 MOI	1	15000000000	5250000000	800000000	1.12e+07	1e-05	0.0046875
RBTnSeq BL21	set1IT059	LZ4	LZ4_phage 14.063 MOI	1	4500000000	1575000000	800000000	1.12e+07	0.1	14.0625
RBTnSeq BL21	set1IT060	LZ4	LZ4_phage 1.4063 MOI	1	4500000000	1575000000	800000000	1.12e+07	0.01	1.40625
RBTnSeq BL21	set1IT061	LZ4	LZ4_phage 0.14063 MOI	1	4500000000	1575000000	800000000	1.12e+07	0.001	0.140625
RBTnSeq BL21	set1IT062	LZ4	LZ4_phage 0.014063 MOI	1	4500000000	1575000000	800000000	1.12e+07	0.0001	0.0140625
RBTnSeq BL21	set1IT063	LZ4	LZ4_phage 0.0014063 MOI	1	4500000000	1575000000	800000000	1.12e+07	1e-05	0.00140625
RBTnSeq BL21	set1IT065	CEV1	Cev1_phage 6.25 MOI	1	2000000000	700000000	800000000	1.12e+07	0.1	6.25
RBTnSeq BL21	set1IT066	CEV1	Cev1_phage 0.625 MOI	1	2000000000	700000000	800000000	1.12e+07	0.01	0.625
RBTnSeq BL21	set1IT067	CEV1	Cev1_phage 0.00625 MOI	1	2000000000	700000000	800000000	1.12e+07	0.0001	0.00625
RBTnSeq BL21	set1IT068	CEV2	Cev2_phage 7.813 MOI	1	2500000000	875000000	800000000	1.12e+07	0.1	7.8125
RBTnSeq BL21	set1IT069	CEV2	Cev2_phage 0.07813 MOI	1	2500000000	875000000	800000000	1.12e+07	0.001	0.078125
RBTnSeq BL21	set1IT070	CEV2	Cev2_phage 0.007813 MOI	1	2500000000	875000000	800000000	1.12e+07	0.0001	0.0078125
RBTnSeq BL21	set2IT070	T2	T2_phage_9.6875_MOI	1	3100000000	1085000000	800000000	1.12e+07	0.1	9.6875
RBTnSeq BL21	set2IT086	T3	T3_phage_3.4375_MOI	1	1100000000	385000000	800000000	1.12e+07	0.1	3.4375
RBTnSeq BL21	set2IT087	T7	T7_phage_31.25_MOI	2	10000000000	3500000000	800000000	1.12e+07	0.1	31.25
Dub-seq BW25113	Setd1IT047	T2	IT047_T2_Phage-SM-1_MOI_16.66	3	5330000000	1865500000	800000000	1.12e+07	0.1	16.6563
Dub-seq BW25113	Setd1IT048	T2	IT048_T2_Phage-SM-2_MOI_1.66	3	5330000000	1865500000	800000000	1.12e+07	0.01	1.66563
Dub-seq BW25113	Setd1IT049	T2	IT049_T2_Phage-SM-3_MOI_0.16	3	5330000000	1865500000	800000000	1.12e+07	0.001	0.166563
Dub-seq BW25113	Setd1IT050	T2	IT050_T2_Phage-SM-4_MOI_0.016	3	5330000000	1865500000	800000000	1.12e+07	0.0001	0.0166563
Dub-seq BW25113	Setd1IT051	T3	IT051_T3_Phage-SM-1_MOI_4.16	3	1330000000	465500000	800000000	1.12e+07	0.1	4.15625
Dub-seq BW25113	Setd1IT052	T3	IT052_T3_Phage-SM-2_MOI_0.41	3	1330000000	465500000	800000000	1.12e+07	0.01	0.415625
Dub-seq BW25113	Setd1IT053	T3	IT053_T3_Phage-SM-3_MOI_0.0416	3	1330000000	465500000	800000000	1.12e+07	0.001	0.0415625
Dub-seq BW25113	Setd1IT054	T3	IT054_T3_Phage-SM-4_MOI_0.0042	3	1330000000	465500000	800000000	1.12e+07	0.0001	0.00415625
Dub-seq BW25113	Setd1IT055	T4	IT055_T4_Phage-SM-1_MOI_17.71	3	56680000000	19838000000	800000000	1.12e+07	0.01	17.7125
Dub-seq BW25113	Setd1IT056	T4	IT056_T4_Phage-SM-2_MOI_1.771	3	56680000000	19838000000	800000000	1.12e+07	0.001	1.77125
Dub-seq BW25113	Setd1IT057	T4	IT057_T4_Phage-SM-3_MOI_0.1771	3	56680000000	19838000000	800000000	1.12e+07	0.0001	0.177125
Dub-seq BW25113	Setd1IT058	T4	IT058_T4_Phage-SM-4_MOI_0.01771	3	56680000000	19838000000	800000000	1.12e+07	1e-05	0.0177125
Dub-seq BW25113	Setd1IT059	T5	IT059_T5_Phage-SM-1_MOI_1.875	3	6000000000	2.1e+09	800000000	1.12e+07	0.01	1.875
Dub-seq BW25113	Setd1IT060	T5	IT060_T5_Phage-SM-2_MOI_0.1875	3	6000000000	2.1e+09	800000000	1.12e+07	0.001	0.1875
Dub-seq BW25113	Setd1IT061	T5	IT061_T5_Phage-SM-3_MOI_0.01875	3	6000000000	2.1e+09	800000000	1.12e+07	0.0001	0.01875
Dub-seq BW25113	Setd1IT062	T5	IT062_T5_Phage-SM-4_MOI_0.001875	3	6000000000	2.1e+09	800000000	1.12e+07	1e-05	0.001875
Dub-seq BW25113	Setd1IT063	T6	IT063_T6_Phage-SM-1_MOI_15.625	3	5000000000	1750000000	800000000	1.12e+07	0.1	15.625
Dub-seq BW25113	Setd1IT064	T6	IT064_T6_Phage-SM-2_MOI_1.5625	3	5000000000	1750000000	800000000	1.12e+07	0.01	1.5625
Dub-seq BW25113	Setd1IT065	T6	IT065_T6_Phage-SM-3_MOI_0.15625	3	5000000000	1750000000	800000000	1.12e+07	0.001	0.15625
Dub-seq BW25113	Setd1IT066	T6	IT066_T6_Phage-SM-4_MOI_0.015625	3	5000000000	1750000000	800000000	1.12e+07	0.0001	0.015625
Dub-seq BW25113	Setd1IT073	N4	IT073_N4_Phage-SM-1_MOI_0.10416	3	3333000000	1166550000	800000000	1.12e+07	0.001	0.104156
Dub-seq BW25113	Setd1IT074	N4	IT074_N4_Phage-SM-2_MOI_0.010416	3	3333000000	1166550000	800000000	1.12e+07	0.0001	0.0104156
Dub-seq BW25113	Setd1IT075	N4	IT075_N4_Phage-SM-3_MOI_0.0010416	3	3333000000	1166550000	800000000	1.12e+07	1e-05	0.00104156
Dub-seq BW25113	Setd1IT076	N4	IT076_N4_Phage-SM-4_MOI_0.00010416	3	3333000000	1166550000	800000000	1.12e+07	1e-06	0.000104156
Dub-seq BW25113	Setd1IT077	cI857	IT077_cI857_Phage-SM-1_MOI_41.66	3	1333000000	466550000	800000000	1.12e+07	0.1	4.16563
Dub-seq BW25113	Setd1IT078	cI857	IT078_cI857_Phage-SM-2_MOI_4.166	3	1333000000	466550000	800000000	1.12e+07	0.01	0.416563
Dub-seq BW25113	Setd1IT079	cI857	IT079_cI857_Phage-SM-3_MOI_0.4166	3	1333000000	466550000	800000000	1.12e+07	0.001	0.0416563
Dub-seq BW25113	Setd1IT080	cI857	IT080_cI857_Phage-SM-4_MOI_0.04166	3	1333000000	466550000	800000000	1.12e+07	0.0001	0.00416563
Dub-seq BW25113	Setd1IT081	LZ4	IT081_LZ4_Phage-SM-1_MOI_5.94	3	1900000000	665000000	800000000	1.12e+07	0.1	5.9375
Dub-seq BW25113	Setd1IT082	LZ4	IT082_LZ4_Phage-SM-2_MOI_0.594	3	1900000000	665000000	800000000	1.12e+07	0.01	0.59375
Dub-seq BW25113	Setd1IT083	LZ4	IT083_LZ4_Phage-SM-3_MOI_0.0594	3	1900000000	665000000	800000000	1.12e+07	0.001	0.059375
Dub-seq BW25113	Setd1IT084	LZ4	IT084_LZ4_Phage-SM-4_MOI_0.00594	3	1900000000	665000000	800000000	1.12e+07	0.0001	0.0059375
Dub-seq BW25113	Setd1IT085	CEV1	IT085_CEV1_Phage-SM-1_MOI_1.875	3	600000000	210000000	800000000	1.12e+07	0.1	1.875
Dub-seq BW25113	Setd1IT086	CEV1	IT086_CEV1_Phage-SM-2_MOI_0.1875	3	600000000	210000000	800000000	1.12e+07	0.01	0.1875
Dub-seq BW25113	Setd1IT087	CEV1	IT087_CEV1_Phage-SM-3_MOI_0.01875	3	600000000	210000000	800000000	1.12e+07	0.001	0.01875
Dub-seq BW25113	Setd1IT088	CEV1	IT088_CEV1_Phage-SM-4_MOI_0.001875	3	600000000	210000000	800000000	1.12e+07	0.0001	0.001875
Dub-seq BW25113	Setd1IT089	186	IT089_I86_Phage-SM-1_MOI_26.04	3	8333000000	2916550000	800000000	1.12e+07	0.1	26.0406
Dub-seq BW25113	Setd1IT090	186	IT090_I86_Phage-SM-2_MOI_2.604	3	8333000000	2916550000	800000000	1.12e+07	0.01	2.60406
Dub-seq BW25113	Setd1IT091	186	IT091_I86_Phage-SM-3_MOI_0.2604	3	8333000000	2916550000	800000000	1.12e+07	0.001	0.260406
Dub-seq BW25113	Setd1IT092	186	IT092_I86_Phage-SM-4_MOI_0.02604	3	8333000000	2916550000	800000000	1.12e+07	0.0001	0.0260406
Dub-seq BW25113	Setd1IT093	CEV2	IT093_CEV2_Phage-SM-1_MOI_16.67	3	5337000000	1867950000	800000000	1.12e+07	0.1	16.6781
Dub-seq BW25113	Setd1IT094	CEV2	IT094_CEV2_Phage-SM-2_MOI_1.67	3	5337000000	1867950000	800000000	1.12e+07	0.01	1.66781
Dub-seq BW25113	Setd1IT095	CEV2	IT095_CEV2_Phage-SM-3_MOI_0.167	3	5337000000	1867950000	800000000	1.12e+07	0.001	0.166781
Dub-seq BW25113	Setd1IT096	CEV2	IT096_CEV2_Phage-SM-4_MOI_0.0167	3	5337000000	1867950000	800000000	1.12e+07	0.0001	0.0166781
Dub-seq BW25113	Setd2	T7	T7_phage 62.5 MOI	1	2000000000	700000000	800000000	1.12e+07	1	62.5
Dub-seq BW25113	Setd2	T7	T7_phage 6.25 MOI	1	2000000000	700000000	800000000	1.12e+07	0.1	6.25
Dub-seq BW25113	Setd2	T7	T7_phage 0.625 MOI	1	2000000000	700000000	800000000	1.12e+07	0.01	0.625
Dub-seq BW25113	Setd2	T7	T7_phage 0.0625 MOI	1	2000000000	700000000	800000000	1.12e+07	0.001	0.0625
Dub-seq BW25113	Setd2	T7	T7_phage 0.00625 MOI	1	2000000000	700000000	800000000	1.12e+07	0.0001	0.00625
Dub-seq BW25113	Setd2	P1	P1_phage 218.75 MOI	1	70000000000	24500000000	800000000	1.12e+07	0.1	218.75
Dub-seq BW25113	Setd2	P1	P1_phage 21.875 MOI	1	70000000000	24500000000	800000000	1.12e+07	0.01	21.875
Dub-seq BW25113	Setd2	P1	P1_phage 0.21875 MOI	1	70000000000	24500000000	800000000	1.12e+07	0.001	2.1875
Dub-seq BW25113	Setd2	P1	P1_phage 0.021875 MOI	1	70000000000	24500000000	800000000	1.12e+07	0.0001	0.21875
Dub-seq BW25113 solid	Setd3IT004	T2	IT004_T2_phage_9.6875_MOI	2	3100000000	1085000000	800000000	1.12e+07	0.1	9.6875
Dub-seq BW25113 solid	Setd3IT005	T3	IT005_T3_phage_3.4375_MOI	2	1100000000	385000000	800000000	1.12e+07	0.1	3.4375
Dub-seq BW25113 solid	Setd3IT006	T4	IT006_T4_phage_221.875_MOI	2	71000000000	24850000000	800000000	1.12e+07	0.1	221.875
Dub-seq BW25113 solid	Setd3IT007	T5	IT007_T5_phage_625_MOI	2	200000000000	70000000000	800000000	1.12e+07	0.1	625
Dub-seq BW25113 solid	Setd3IT008	T6	IT008_T6_phage_62.5_MOI	2	20000000000	7000000000	800000000	1.12e+07	0.1	62.5
Dub-seq BW25113 solid	Setd3IT009	T7	IT009_T7_phage_31.25_MOI	2	10000000000	3500000000	800000000	1.12e+07	0.1	31.25
Dub-seq BW25113 solid	Setd3IT010	P1	IT010_P1_phage_9.375_MOI	2	3000000000	1.05e+09	800000000	1.12e+07	0.1	9.375
Dub-seq BW25113 solid	Setd3IT011	P2	IT011_P2_phage_0.5625_MOI	2	180000000	6.3e+07	800000000	1.12e+07	0.1	0.5625
Dub-seq BW25113 solid	Setd3IT012	lambda cI857	IT012_lambda cI857_phage_12.5_MOI	2	4000000000	1400000000	800000000	1.12e+07	0.1	12.5
Dub-seq BW25113 solid	Setd3IT013	CEV1	IT013_CEV1_phage_0.3125_MOI	2	100000000	35000000	800000000	1.12e+07	0.1	0.3125
Dub-seq BW25113 solid	Setd3IT014	CEV2	IT014_CEV2_phage_84.375_MOI	2	27000000000	9450000000	800000000	1.12e+07	0.1	84.375
Dub-seq BW25113 solid	Setd3IT015	LZ4	IT015_LZ4_phage_4.6875_MOI	2	1500000000	5.25e+08	800000000	1.12e+07	0.1	4.6875
Dub-seq BW25113 solid	Setd3IT016	N4	IT016_N4_phage_1937.5_MOI	2	620000000000	217000000000	800000000	1.12e+07	0.1	1937.5
Dub-seq BW25113 solid	Setd3IT017	186	IT017_186_phage_125_MOI	2	40000000000	14000000000	800000000	1.12e+07	0.1	125
Dub-seq BL21	Setd3IT037	T2	IT037_T2_phage_9.6875_MOI_LIQUIDassay	2	3100000000	1085000000	800000000	1.12e+07	0.1	9.6875
Dub-seq BL21	Setd3IT038	T3	IT038_T3_phage_3.4375_MOI_LIQUIDassay	2	1100000000	385000000	800000000	1.12e+07	0.1	3.4375
Dub-seq BL21	Setd3IT039	T4	IT039_T4_phage_221.875_MOI_LIQUIDassay	2	71000000000	24850000000	800000000	1.12e+07	0.1	221.875
Dub-seq BL21	Setd3IT040	T5	IT040_T5_phage_625_MOI_LIQUIDassay	2	200000000000	70000000000	800000000	1.12e+07	0.1	625
Dub-seq BL21	Setd3IT041	T6	IT041_T6_phage_62.5_MOI_LIQUIDassay	2	20000000000	7000000000	800000000	1.12e+07	0.1	62.5
Dub-seq BL21	Setd3IT042	T7	IT042_T7_phage_31.25_MOI_LIQUIDassay	2	10000000000	3500000000	800000000	1.12e+07	0.1	31.25
Dub-seq BL21	Setd3IT043	P1	IT043_P1_phage_9.375_MOI_LIQUIDassay	2	3000000000	1.05e+09	800000000	1.12e+07	0.1	9.375
Dub-seq BL21	Setd3IT044	P2	IT044_P2_phage_0.5625_MOI_LIQUIDassay	2	180000000	6.3e+07	800000000	1.12e+07	0.1	0.5625
Dub-seq BL21	Setd3IT045	lambda cI857	IT045_lambda1857_phage_12.5_MOI_LIQUIDassay	2	4000000000	1400000000	800000000	1.12e+07	0.1	12.5
Dub-seq BL21	Setd3IT046	CEV1	IT046_CEV1_phage_0.3125_MOI_LIQUIDassay	2	100000000	35000000	800000000	1.12e+07	0.1	0.3125
Dub-seq BL21	Setd3IT047	CEV2	IT047_CEV2_phage_84.375_MOI_LIQUIDassay	2	27000000000	9450000000	800000000	1.12e+07	0.1	84.375
Dub-seq BL21	Setd3IT048	LZ4	IT048_LZ4_phage_4.6875_MOI_LIQUIDassay	2	1500000000	5.25e+08	800000000	1.12e+07	0.1	4.6875
Dub-seq BL21_Solid	Setd4IT022	T2	IT022_T2_phage_9.6875_MOI	2	3100000000	1085000000	800000000	1.12e+07	0.1	9.6875
Dub-seq BL21_Solid	Setd4IT023	T3	IT023_T3_phage_3.4375_MOI	2	1100000000	385000000	800000000	1.12e+07	0.1	3.4375
Dub-seq BL21_Solid	Setd4IT024	T4	IT024_T4_phage_221.875_MOI	2	71000000000	24850000000	800000000	1.12e+07	0.1	221.875
Dub-seq BL21_Solid	Setd4IT025	T5	IT025_T5_phage_625_MOI	2	200000000000	70000000000	800000000	1.12e+07	0.1	625
Dub-seq BL21_Solid	Setd4IT026	T6	IT026_T6_phage_62.5_MOI	2	20000000000	7000000000	800000000	1.12e+07	0.1	62.5
Dub-seq BL21_Solid	Setd4IT027	T7	IT027_T7_phage_31.25_MOI	2	10000000000	3500000000	800000000	1.12e+07	0.1	31.25
Dub-seq BL21_Solid	Setd4IT028	P1	IT028_P1_phage_9.375_MOI	2	3000000000	1.05e+09	800000000	1.12e+07	0.1	9.375
Dub-seq BL21_Solid	Setd4IT029	P2	IT029_P2_phage_0.5625_MOI	2	180000000	6.3e+07	800000000	1.12e+07	0.1	0.5625
Dub-seq BL21_Solid	Setd4IT030	lambda cI857	IT030_lambda1857_phage_12.5_MOI	2	4000000000	1400000000	800000000	1.12e+07	0.1	12.5
Dub-seq BL21_Solid	Setd4IT031	CEV1	IT031_CEV1_phage_0.3125_MOI	2	100000000	35000000	800000000	1.12e+07	0.1	0.3125
Dub-seq BL21_Solid	Setd4IT032	CEV2	IT032_CEV2_phage_84.375_MOI	2	27000000000	9450000000	800000000	1.12e+07	0.1	84.375
Dub-seq BL21_Solid	Setd4IT033	LZ4	IT033_LZ4_phage_4.6875_MOI	2	1500000000	5.25e+08	800000000	1.12e+07	0.1	4.6875
CRISPRi	Set4	T2	T2_CRPSRI_MOI1	4	35000000000	12250000000	800000000	2.8e+07	0.0023	1.00625
CRISPRi	Set4	T3	T3_CRPSRI_MOI1	4	500000000	175000000	800000000	2.8e+07	0.16	1
CRISPRi	Set4	T4	T4_CRPSRI_MOI1	4	100000000000	35000000000	800000000	2.8e+07	0.0008	1
CRISPRi	Set4	T5	T5_CRPSRI_MOI1	4	350000000000	1.225e+11	800000000	2.8e+07	0.000228571	1
CRISPRi	Set4	T6	T6_CRPSRI_MOI1	4	30000000000	10500000000	800000000	2.8e+07	0.00266667	1
CRISPRi	Set4	T7	T7_CRPSRI_MOI1	4	15000000000	5250000000	800000000	2.8e+07	0.00533333	1
CRISPRi	Set4	186	186_CRPSRI_MOI1	4	35000000000	12250000000	800000000	2.8e+07	0.00228571	1
CRISPRi	Set4	lambda1857	lambda1857_CRPSRI_MOI1	4	2500000000	875000000	800000000	2.8e+07	0.032	1
CRISPRi	Set4	CEV1	CEV1_CRPSRI_MOI1	4	2500000000	875000000	800000000	2.8e+07	0.032	1
CRISPRi	Set4	CEV2	CEV2_CRPSRI_MOI1	4	80000000000	28000000000	800000000	2.8e+07	0.001	1
CRISPRi	Set4	LZ4	LZ4_CRPSRI_MOI1	4	4000000000	1400000000	800000000	2.8e+07	0.02	1
CRISPRi	Set4	N4	N4_CRPSRI_MOI1	4	1300000000000	455000000000	800000000	2.8e+07	6.15385e-05	1
CRISPRi	Set4	P1	P1_CRPSRI_MOI1	2	3000000000	1.05e+09	800000000	2.8e+07	0.0266667	1
CRISPRi	Set4	P2	P2_CRPSRI_MOI1	2	180000000	6.3e+07	800000000	2.8e+07	0.444444	1
